# Supplementary material
Source: PubMed Central journal article supplement (PMC5511561)

Supplementary Figure S1

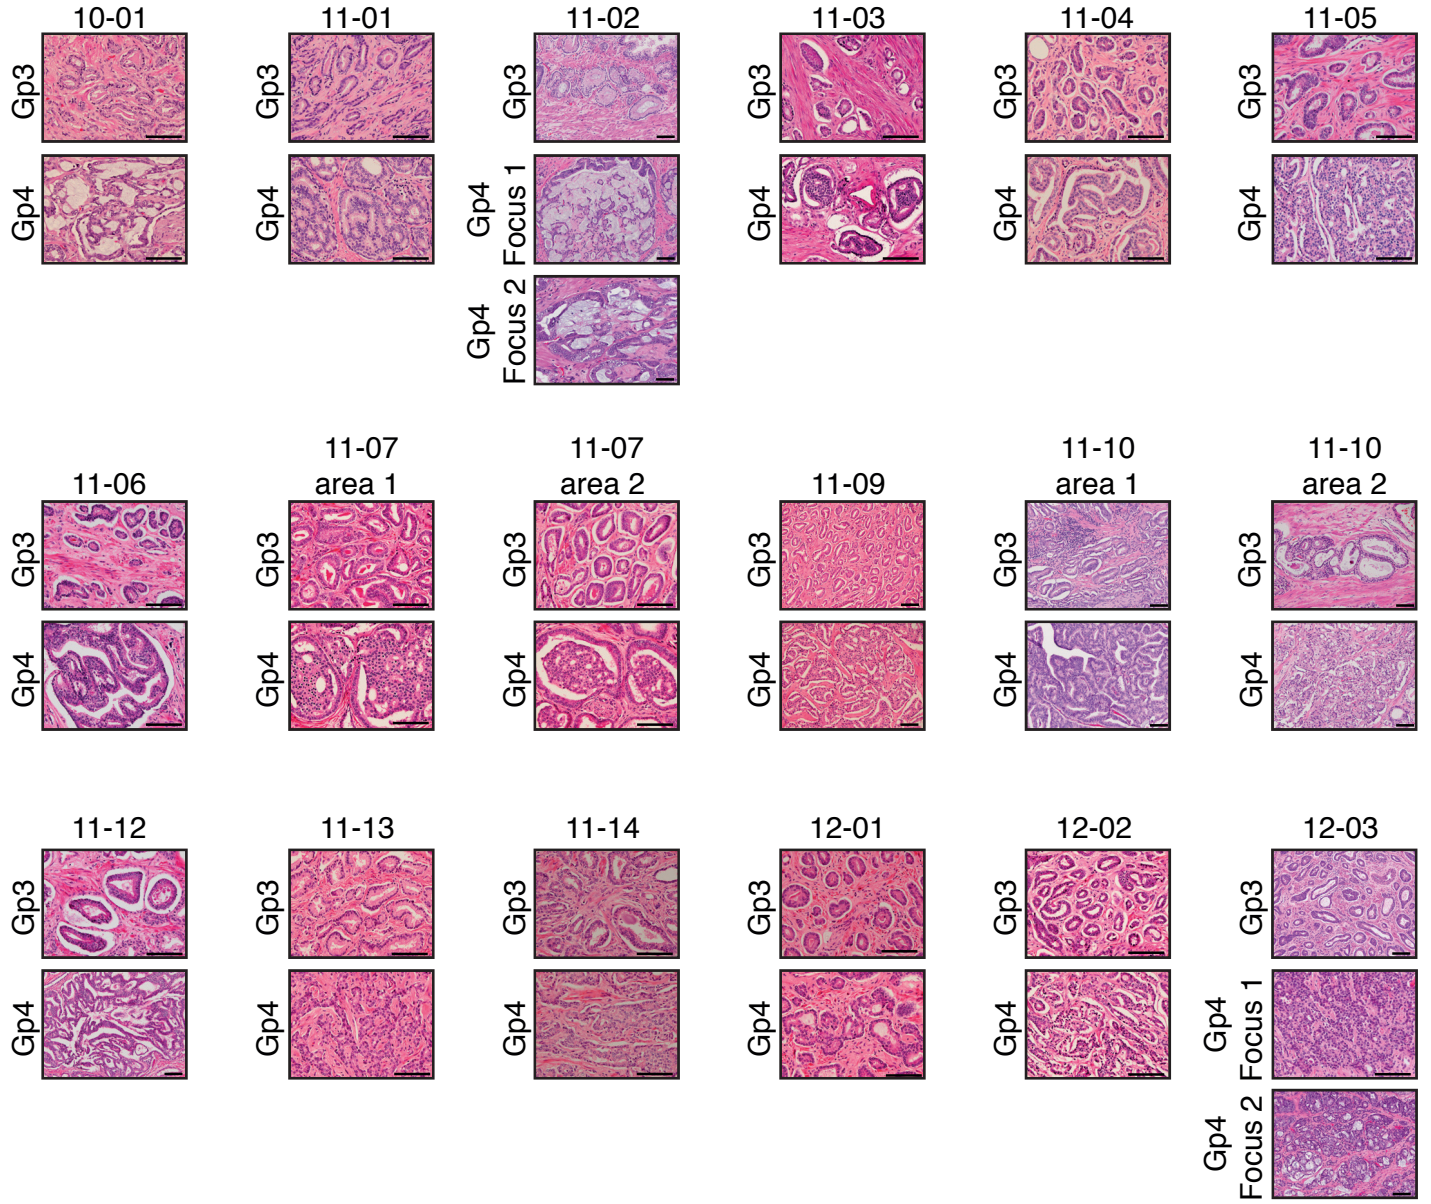

# Supplementary Figure S2

A

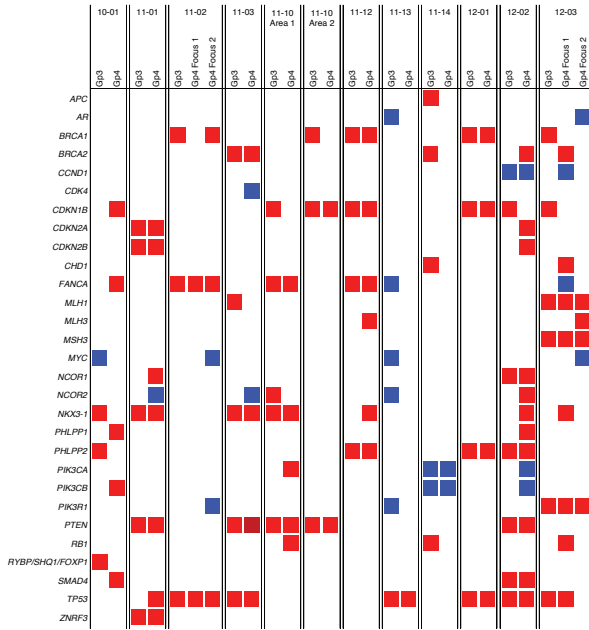

B

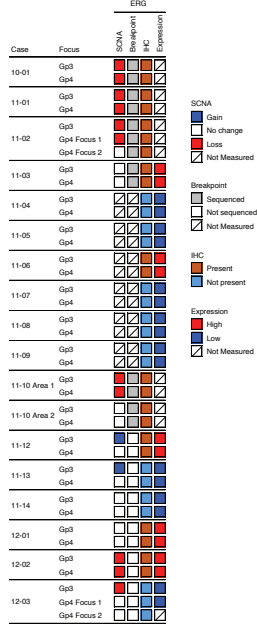

Supplementary Figure S3

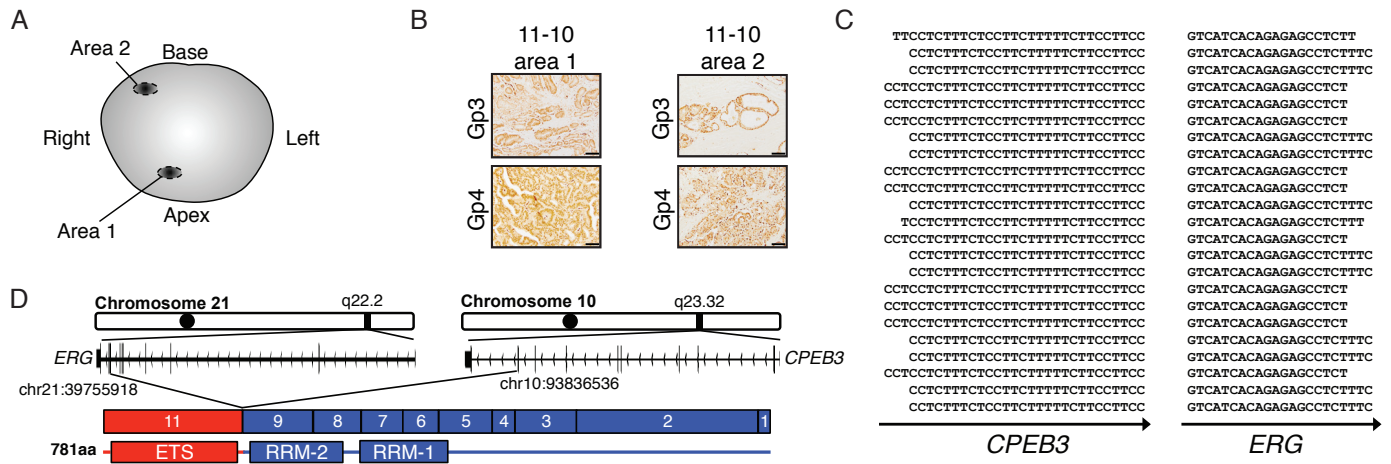

# Supplementary Figure S4

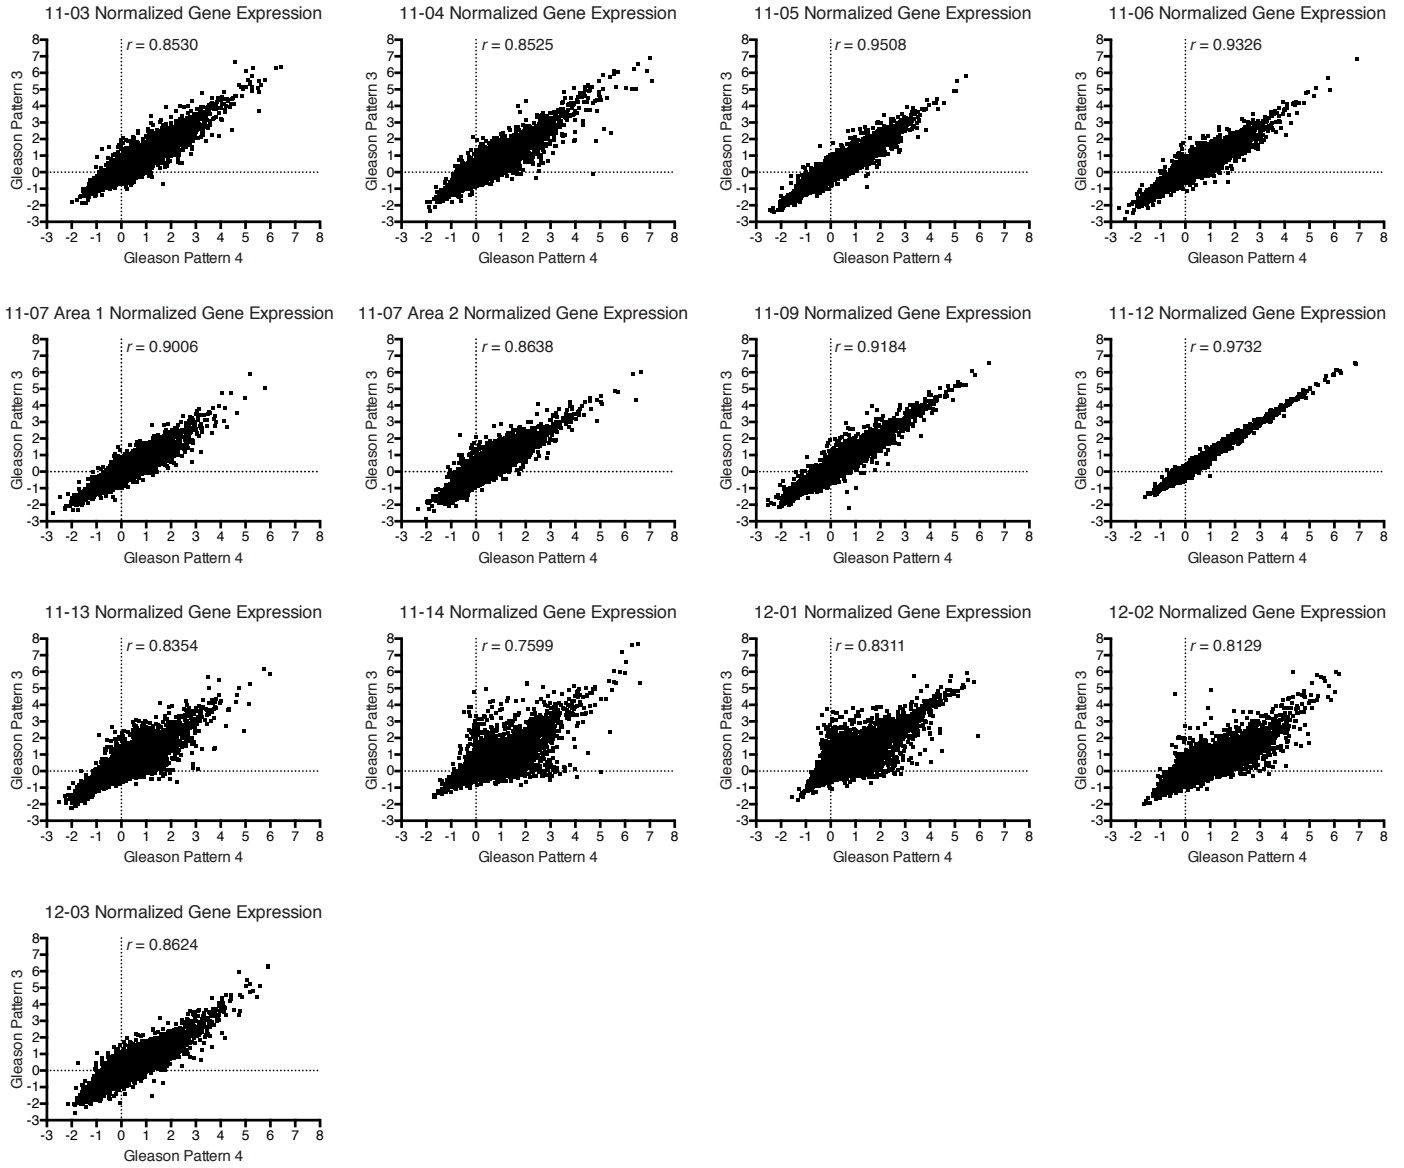

# Supplementary Figure S5

A

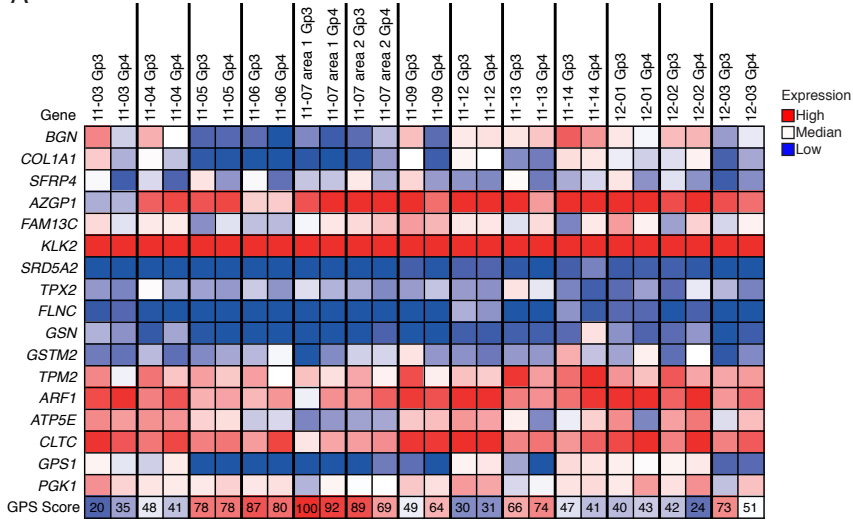

B

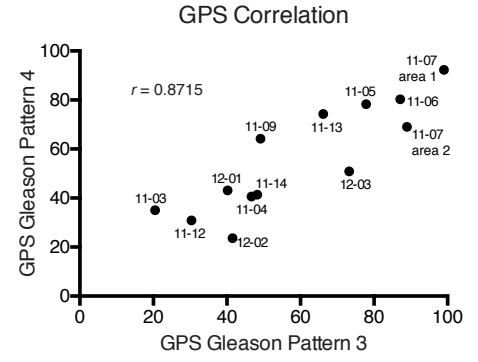

Supplement: NIHMS847247-supplement-2.pdf [file NIHMS847247-supplement-2.pdf]
