# Supplementary material
Source: PubMed Central journal article supplement (PMC5511561)
Supplement: NIHMS847247-supplement-3.pdf [file NIHMS847247-supplement-3.pdf]

**Supplementary Table S1. Clinical characteristics of prostate cancer cases analyzed in this study.** For each case used in this study, the patient's race and age at time of surgery is shown. Also shown are tissue-specific parameters, including the fixative used, the Gleason score of the radical prostatectomy (RP), the pathologic T stage at RP, the extent of tumor involvement of the prostate, % of Gp4 in the overall tumor, Gp4 histologic subtype, and immunoreactivity of index tumor to anti-ERG antibody.

| Case  | Race             | Age | Fixative         | Gleason Score of RP | Stage of RP | Tumor Volume (%) | % of Gp4 in Overall Tumor | ERG Status (IHC) | Gp4 Histologic Subtype                                               |
|-------|------------------|-----|------------------|---------------------|-------------|------------------|---------------------------|------------------|----------------------------------------------------------------------|
| 10-01 | Caucasian        | 52  | formalin         | 3+4=7               | pT2c        | 10               | 30                        | positive         | mucinous cribriform                                                  |
| 11-01 | Caucasian        | 66  | formalin         | 3+4=7               | pT2c        | 5-10             | 40                        | positive         | cribriform and glomeruloid                                           |
| 11-02 | Caucasian        | 54  | formalin         | 3+4=7               | pT2c        | 20               | 20                        | positive         | mucinous cribriform and glomeruloid                                  |
| 11-03 | African American | 63  | PAXgene          | 3+4=7 & Tertiary 5  | pT3b        | 40               | 40                        | positive         | cribriform, ill-defined, and glomeruloid                             |
| 11-04 | Caucasian        | 64  | PAXgene          | 4+3=7 & Tertiary 5  | pT3b        | 30-40            | 50                        | negative         | cribriform and glomeruloid                                           |
| 11-05 | Caucasian        | 55  | PAXgene          | 3+4=7               | pT3a        | 10               | 30                        | negative         | cribriform and glomeruloid                                           |
| 11-06 | Caucasian        | 65  | PAXgene          | 4+3=7 & Tertiary 5  | pT3a        | 30               | 50                        | positive         | cribriform and ill-defined                                           |
| 11-07 | Caucasian        | 66  | PAXgene          | 4+3=7               | pT2c        | 5-10             | 60                        | negative         | cribriform and glomeruloid                                           |
| 11-09 | Caucasian        | 43  | PAXgene          | 4+3=7               | pT3a        | 10               | 60                        | negative         | cribriform and fused                                                 |
| 11-10 | Caucasian        | 50  | formalin         | 3+4=7               | pT3b        | 35               | 40                        | positive         | cribriform and fused (area 1)<br>cribriform and glomeruloid (area 2) |
| 11-12 | Caucasian        | 58  | PAXgene          | 3+4=7               | pT2c        | 10               | 10                        | positive         | cribriform and fused                                                 |
| 11-13 | Hispanic         | 72  | PAXgene          | 4+5=9               | pT3a        | 25               | 80                        | negative         | cribriform and microacinar                                           |
| 11-14 | Caucasian        | 69  | PAXgene          | 4+3=7               | pT2c        | <5               | 60                        | negative         | ill-defined, fused, and cribriform                                   |
| 12-01 | Caucasian        | 50  | PAXgene          | 3+4=7               | pT3a        | 10-20            | 30                        | positive         | ill-defined, fused, glomeruloid and cribriform                       |
| 12-02 | Caucasian        | 54  | PAXgene          | 3+4=7               | pT3a        | 10-15            | 40                        | positive         | mucinous cribriform, ill-defined, and glomeruloid                    |
| 12-03 | Unknown          | 64  | PAXgene/formalin | 4+3=7               | pT2c        | 15-20            | 60                        | negative         | fused and cribriform                                                 |

**Supplementary Table S2.** Shared mutations in each case. For each Gs7 PCa case, all somatic mutations shared by each focus are shown, with the total depth of coverage, variant allele frequency and computed cancer cell fraction (CCF) for each tumor sample. For the benign control, depth of coverage and variant allele frequency are shown.

| Case         | Genomic Coordinates | Classification    | Gene Symbol | Effect   | Description                                                            | Normal coverage (freq.) | Gp3 tumor coverage (freq.) | Gp4 Focus 1 tumor coverage (freq.) | Gp4 Focus 2 tumor coverage (freq.) | Gp3 tumor CCF | Gp4 Focus 1 tumor CCF | Gp4 Focus 2 tumor CCF |
|--------------|---------------------|-------------------|-------------|----------|------------------------------------------------------------------------|-------------------------|----------------------------|------------------------------------|------------------------------------|---------------|-----------------------|-----------------------|
| 10-01        | g.chr7:134253042G>T | Missense Mutation | AKR1B15     | p.A95S   | aldo-keto reductase family 1, member B15                               | 71 (0.00)               | 71 (0.27)                  | 95 (0.29)                          | N/A                                | 0.53          | 0.79                  | N/A                   |
| 10-01        | g.chr21:11064776C>A | RNA               | BAGE2       |          | B melanoma antigen family, member 2 leucine rich repeat transmembrane  | 45 (0.02)               | 42 (0.14)                  | 42 (0.12)                          | N/A                                | 0.38          | 0.32                  | N/A                   |
| 10-01        | g.chr10:68687216G>A | Missense Mutation | LRRTM3      | p.R181H  | neuronal 3                                                             | 59 (0.00)               | 67 (0.48)                  | 72 (0.33)                          | N/A                                | 1.27          | 0.89                  | N/A                   |
| 10-01        | g.chr6:170871040A>G | Silent            | TBP         | p.Q72Q   | TATA box binding protein                                               | 25 (0.00)               | 21 (0.19)                  | 28 (0.29)                          | N/A                                | 0.51          | 0.76                  | N/A                   |
| 10-01        | g.chr21:42871382G>A | Intron            | TMPRSS2     |          | transmembrane protease, serine 2                                       | 99 (0.01)               | 152 (0.29)                 | 162 (0.26)                         | N/A                                | 0.77          | 0.69                  | N/A                   |
| 10-01        | g.chr21:42873082C>T | Intron            | TMPRSS2     |          | transmembrane protease, serine 2                                       | 99 (0.01)               | 104 (0.33)                 | 124 (0.30)                         | N/A                                | 0.87          | 0.80                  | N/A                   |
| 10-01        | g.chr2:179585117A>C | Missense Mutation | TTN         | p.F7791C | titin                                                                  | 90 (0.00)               | 122 (0.40)                 | 144 (0.27)                         | N/A                                | 1.07          | 0.72                  | N/A                   |
| 11-01        | g.chr19:17122463G>A | Silent            | CPAMD8      | p.D171D  | C3 and PZP-like, alpha-2-macroglobulin domain containing 8             | 23 (0.00)               | 26 (0.58)                  | 39 (0.26)                          | N/A                                | 1.54          | 0.68                  | N/A                   |
| 11-01        | g.chr7:27181615G>A  | Missense Mutation | HOXA5       | p.R218C  | homeobox A5                                                            | 103 (0.01)              | 67 (0.75)                  | 101 (0.48)                         | N/A                                | 1.99          | 1.27                  | N/A                   |
| 11-01        | g.chr12:55969047G>T | Missense Mutation | OR2AP1      | p.L283F  | olfactory receptor, family 2, subfamily AP, member 1                   | 71 (0.00)               | 45 (0.58)                  | 84 (0.33)                          | N/A                                | 1.54          | 0.89                  | N/A                   |
| 11-01        | g.chr18:60021761C>T | Missense Mutation | TNFRSF11A   | p.H141Y  | tumor necrosis factor receptor superfamily, member 11a, NFKB activator | 17 (0.00)               | 30 (0.40)                  | 65 (0.45)                          | N/A                                | 1.07          | 1.19                  | N/A                   |
| 11-02        | g.chr2:91888374A>G  | RNA               | AC027612.3  |          |                                                                        | 34 (0.03)               | 28 (0.21)                  | 31 (0.13)                          | 18 (0.39)                          | 0.57          | 0.34                  | 1.04                  |
| 11-02        | g.chr3:195395533C>T | lincRNA           | LINC00969   |          | long intergenic non-protein coding RNA 969                             | 34 (0.03)               | 56 (0.29)                  | 45 (0.16)                          | 72 (0.11)                          | 0.76          | 0.41                  | 0.30                  |
| 11-02        | g.chr7:78325229T>C  | Intron            | MAGI2       |          | membrane associated guanylate kinase, WW and PDZ domain containing 2   | 23 (0.00)               | 29 (0.31)                  | 35 (0.43)                          | 4 (0.75)                           | 0.83          | 1.14                  | 2.00                  |
| 11-02        | g.chr7:103180662G>T | Missense_Mutation | RELN        | p.S2304R | reelin                                                                 | 58 (0.00)               | 63 (0.37)                  | 23 (0.48)                          | 13 (0.77)                          | 0.97          | 1.28                  | 2.05                  |
| 11-03        | g.chr15:77472927C>T | Missense Mutation | PEAK1       | p.V448I  | pseudopodium-enriched atypical kinase 1                                | 59 (0.00)               | 78 (0.09)                  | 46 (0.17)                          | N/A                                | 0.24          | 0.46                  | N/A                   |
| 11-03        | g.chr2:234247364G>A | Silent            | SAG         | p.V329V  | S-antigen; retina and pineal gland (arrestin)                          | 29 (0.00)               | 11 (0.36)                  | 31 (0.87)                          | N/A                                | 0.97          | 2.32                  | N/A                   |
| 11-10 Area 1 | g.chr6:20488432C>T  | Missense Mutation | E2F3        | p.T363I  | E2F transcription factor 3                                             | 46 (0.00)               | 30 (0.33)                  | 28 (0.39)                          | N/A                                | 0.89          | 1.05                  | N/A                   |
| 11-10 Area 1 | g.chr2:237405962G>A | Silent            | IQCA1       | p.Y60Y   | IQ motif containing with AAA domain 1                                  | 65 (0.02)               | 41 (0.37)                  | 32 (0.53)                          | N/A                                | 0.98          | 1.42                  | N/A                   |
| 11-10 Area 2 | g.chr2:27930812C>A  | Missense Mutation | AC074091.13 | p.W74L   |                                                                        | 129 (0.01)              | 358 (1.00)                 | 5 (0.80)                           | N/A                                | 2.66          | 2.13                  | N/A                   |
| 11-10 Area 2 | g.chr10:70726923C>T | Nonsense Mutation | DDX21       | p.Q352*  | DEAD (Asp-Glu-Ala-Asp) box helicase 21                                 | 55 (0.00)               | 284 (0.40)                 | 6 (0.50)                           | N/A                                | 1.07          | 1.33                  | N/A                   |
| 11-10 Area 2 | g.chr21:39816721G>A | Intron            | ERG         |          | v-ets avian erythroblastosis virus E26 oncogene homolog                | 38 (0.00)               | 4 (0.75)                   | 749 (0.27)                         | N/A                                | 2.00          | 0.72                  | N/A                   |
| 11-10 Area 2 | g.chr21:39816763G>A | Intron            | ERG         |          | v-ets avian erythroblastosis virus E26 oncogene homolog                | 33 (0.00)               | 4 (0.75)                   | 518 (0.38)                         | N/A                                | 2.00          | 1.00                  | N/A                   |
| 11-10 Area 2 | g.chr3:49159398G>A  | Silent            | LAMB2       | p.D1634D | laminin, beta 2 (laminin S)                                            | 35 (0.03)               | 332 (0.90)                 | 20 (0.20)                          | N/A                                | 2.39          | 0.53                  | N/A                   |
| 11-10 Area 2 | g.chr7:79050991T>C  | Intron            | MAGI2       |          | membrane associated guanylate kinase, WW and PDZ domain containing 2   | 55 (0.02)               | 29 (0.97)                  | 71 (0.96)                          | N/A                                | 2.57          | 2.55                  | N/A                   |

|              |                      |                   |               |          |                                                                      |            |            |            |           |      |      |      |
|--------------|----------------------|-------------------|---------------|----------|----------------------------------------------------------------------|------------|------------|------------|-----------|------|------|------|
| 11-10 Area 2 | g.chr4:120474859A>G  | Silent            | PDE5A         | p.Y372Y  | phosphodiesterase 5A, cGMP-specific                                  | 26 (0.00)  | 12 (0.92)  | 56 (0.23)  | N/A       | 2.44 | 0.62 | N/A  |
| 11-10 Area 2 | g.chr5:171472006G>C  | Missense Mutation | STK10         | p.N929K  | serine/threonine kinase 10                                           | 29 (0.00)  | 153 (0.99) | 4 (0.75)   | N/A       | 2.65 | 2.00 | N/A  |
| 11-10 Area 2 | g.chr5:75596718G>T   | Missense Mutation | SV2C          | p.A601S  | synaptic vesicle glycoprotein 2C                                     | 143 (0.00) | 306 (0.93) | 6 (0.50)   | N/A       | 2.48 | 1.33 | N/A  |
| 11-12        | g.chr6:135769513G>T  | Missense Mutation | AHI1          | p.A514E  | Abelson helper integration site 1                                    | 160 (0.01) | 418 (0.17) | 10 (0.30)  | N/A       | 0.45 | 0.80 | N/A  |
| 11-12        | g.chr17:65214783C>T  | Silent            | HELZ          | p.G46G   | helicase with zinc finger                                            | 55 (0.02)  | 201 (1.00) | 20 (0.25)  | N/A       | 2.65 | 0.67 | N/A  |
| 11-13        | g.chr10:101943585A>G | Silent            | ERLIN1        | p.A41A   | ER lipid raft associated 1                                           | 74 (0.00)  | 484 (0.22) | 15 (0.27)  | N/A       | 0.59 | 0.71 | N/A  |
| 11-13        | g.chr5:76646896C>T   | Nonsense Mutation | PDE8B         | p.Q342*  | phosphodiesterase 8B                                                 | 15 (0.00)  | 94 (0.80)  | 9 (0.33)   | N/A       | 1.59 | 0.89 | N/A  |
| 11-13        | g.chr7:77203804A>G   | Intron            | PTPN12        |          | protein tyrosine phosphatase, non-receptor type 12                   | 120 (0.00) | 326 (0.99) | 4 (0.75)   | N/A       | 2.65 | 2.00 | N/A  |
| 11-14        | g.chr6:135769534G>A  | Missense Mutation | AHI1          | p.S507F  | Abelson helper integration site 1                                    | 128 (0.01) | 350 (0.79) | 5 (0.60)   | N/A       | 2.12 | 1.60 | N/A  |
| 11-14        | g.chr9:66458640G>A   | lincRNA           | RP11-262H14.1 |          |                                                                      | 21 (0.00)  | 58 (0.19)  | 47 (0.15)  | N/A       | 0.51 | 0.40 | N/A  |
| 11-14        | g.chr11:117789342T>C | Missense Mutation | TMPRSS13      | p.Q78R   | transmembrane protease, serine 13                                    | 20 (0.00)  | 312 (0.62) | 10 (0.50)  | N/A       | 1.67 | 1.33 | N/A  |
| 11-14        | g.chr11:117789345G>C | Missense Mutation | TMPRSS13      | p.A77G   | transmembrane protease, serine 13                                    | 20 (0.00)  | 312 (0.61) | 9 (0.44)   | N/A       | 1.62 | 1.19 | N/A  |
| 12-01        | g.chr1:144018134G>A  | RNA               | SRGAP2B       |          | SLIT-ROBO Rho GTPase activating protein 2B                           | 19 (0.00)  | 29 (0.31)  | 23 (0.17)  | N/A       | 0.83 | 0.46 | N/A  |
| 12-01        | g.chr12:53457177C>A  | Missense Mutation | TENC1         | p.S1249Y | tensin like C1 domain containing phosphatase (tensin 2)              | 139 (0.00) | 227 (0.15) | 293 (0.15) | N/A       | 0.40 | 0.41 | N/A  |
| 12-02        | g.chr10:63852756G>A  | Silent            | ARID5B        | p.Q1178Q | AT rich interactive domain 5B (MRF1-like)                            | 47 (0.00)  | 26 (0.23)  | 13 (0.69)  | N/A       | 0.62 | 1.85 | N/A  |
| 12-02        | g.chr12:42512938T>A  | Missense Mutation | GXYLT1        | p.H117L  | glucoside xylosyltransferase 1                                       | 18 (0.00)  | 29 (0.69)  | 19 (0.32)  | N/A       | 1.84 | 0.84 | N/A  |
| 12-02        | g.chr1:152192219G>C  | Missense Mutation | HRNR          | p.T629S  | hornerin                                                             | 48 (0.00)  | 176 (0.11) | 288 (0.13) | N/A       | 0.39 | 0.35 | N/A  |
| 12-02        | g.chr4:128625402T>G  | Missense Mutation | INTU          | p.M508R  | inturned planar cell polarity protein                                | 79 (0.00)  | 79 (0.47)  | 21 (0.62)  | N/A       | 1.25 | 1.65 | N/A  |
| 12-02        | g.chr7:78644843G>A   | Intron            | MAGI2         |          | membrane associated guanylate kinase, WW and PDZ domain containing 2 | 118 (0.00) | 48 (0.19)  | 33 (0.27)  | N/A       | 0.50 | 0.73 | N/A  |
| 12-02        | g.chr14:82383115G>A  | lincRNA           | RP11-666E17.1 |          |                                                                      | 21 (0.00)  | 8 (0.62)   | 15 (0.33)  | N/A       | 1.67 | 0.89 | N/A  |
| 12-02        | g.chr4:154702787G>A  | Missense Mutation | SFRP2         | p.S235L  | secreted frizzled-related protein 2                                  | 30 (0.00)  | 21 (0.38)  | 95 (0.57)  | N/A       | 1.02 | 1.52 | N/A  |
| 12-03        | g.chr16:74443526C>T  | Missense Mutation | CLEC18B       | p.V418M  | C-type lectin domain family 18, member B                             | 15 (0.00)  | 233 (0.19) | 145 (0.20) | 14 (0.29) | 0.50 | 0.53 | 0.91 |
| 12-03        | g.chr11:533874T>C    | Missense Mutation | HRAS          | p.Q61R   | Harvey rat sarcoma viral oncogene                                    | 28 (0.04)  | 154 (0.28) | 155 (0.52) | 4 (0.25)  | 0.75 | 1.39 | 0.67 |
| 12-03        | g.chr14:106780672T>G | RNA               | IGHV4-28      |          | immunoglobulin heavy variable 4-28                                   | 20 (0.00)  | 151 (0.23) | 85 (0.48)  | 35 (0.26) | 0.60 | 1.29 | 0.69 |
| 12-03        | g.chr14:106780684G>T | RNA               | IGHV4-28      |          | immunoglobulin heavy variable 4-28                                   | 23 (0.00)  | 164 (0.20) | 79 (0.47)  | 38 (0.24) | 0.54 | 1.25 | 0.63 |
| 12-03        | g.chr14:71209301C>T  | Missense Mutation | MAP3K9        | p.R139H  | mitogen-activated protein kinase kinase 9                            | 12 (0)     | 51 (0.41)  | 35 (0.11)  | 15 (0.47) | 1.09 | 0.29 | 1.25 |

**Supplementary Table S3. Resequencing of a subset of shared mutations.** For each mutation shown, the total number of reads covering each position and the number of reads confirming the alteration are shown. Also shown are the locus-specific sequences of the primer pairs for each alteration. Loci that failed to amplify during verification are omitted from this list. 10 of 12 loci (83%) verified successfully.

| Case  | Chr | Position  | Gene Symbol    | Ref Allele | Alt Allele | Effect     | Norm Cov | Gp3 Cov | Gp4 Focus 1 Cov | Gp4 Focus 2 Cov | Norm Alt Reads | Gp3 Alt Reads | Gp4 Focus 1 Alt Read | Gp4 Focus 2 Alt Reads | Forward Seq                       | Reverse Seq                      |
|-------|-----|-----------|----------------|------------|------------|------------|----------|---------|-----------------|-----------------|----------------|---------------|----------------------|-----------------------|-----------------------------------|----------------------------------|
| 10-01 | 7   | 134253042 | <i>AKR1B15</i> | G          | T          | Coding     | 4315     | 2225    | 6362            | N/A             | 7              | 223           | 2343                 | N/A                   | GCCATTGATG<br>CAGAATATCG<br>CCA   | GCCCACCCGAT<br>CCAGATACT         |
| 10-01 | 10  | 68687216  | <i>LRRTM3</i>  | G          | A          | Coding     | 16921    | 12539   | 17292           | N/A             | 26             | 3077          | 4165                 | N/A                   | GAACAGTTTC<br>GGGGCTTGCG          | TGTGCTCCAGG<br>TGAAGTTCTTT<br>GA |
| 10-01 | 21  | 42871382  | <i>TMPRSS2</i> | G          | A          | Non-coding | 4809     | 3510    | 5961            | N/A             | 1              | 1336          | 1492                 | N/A                   | AAGCCGCATT<br>CTGACATCAC<br>TCT   | TGAGGAACCCG<br>ATCAGATATCC<br>AG |
| 10-01 | 21  | 42873082  | <i>TMPRSS2</i> | C          | T          | Non-coding | 13934    | 17334   | 27532           | N/A             | 45             | 7449          | 10729                | N/A                   | ATCAATACTC<br>AAAACCCACA<br>CTTGC | AACTGACTTGG<br>GCACACGGAA        |
| 11-01 | 7   | 27181615  | <i>HOXA5</i>   | G          | A          | Coding     | 80057    | 58726   | 75717           | N/A             | 61             | 50628         | 25920                | N/A                   | TTCCACTTCA<br>TTCTCCGTT<br>TTGG   | GCAGACAACAT<br>AGGCGGCC          |
| 11-02 | 7   | 78325229  | <i>MAGI2</i>   | T          | C          | Non-coding | 502      | 1116    | 2506            | 1634            | 0              | 214           | 546                  | 551                   | CTGCTGCCCC<br>ATCAGGAGG           | CTCAGGGCTGC<br>AGTGAGCTA         |
| 11-02 | 7   | 103180662 | <i>RELN</i>    | G          | T          | Coding     | 3051     | 7821    | 3114            | 754             | 11             | 48            | 1637                 | 266                   | AGTTAATCCT<br>GAAGGGACTG<br>ACCT  | GCCTCTCGTGG<br>AGTCTTCTCA        |
| 11-10 | 6   | 20488432  | <i>E2F3</i>    | C          | T          | Coding     | 5590     | 6056    | 6547            | N/A             | 14             | 1906          | 3076                 | N/A                   | TTGGCAAGTA<br>CCCAAGGGC           | GCTTGTGGTTC<br>CAATACAGATG<br>GT |

|       |    |           |               |   |   |        |       |       |       |      |      |      |       |      |                                   |                                   |
|-------|----|-----------|---------------|---|---|--------|-------|-------|-------|------|------|------|-------|------|-----------------------------------|-----------------------------------|
| 12-02 | 1  | 152192219 | <i>HRNR</i>   | G | C | Coding | 9939  | 8325  | 17586 | N/A  | 2075 | 4796 | 8394  | N/A  | GGCCGCGACT<br>AGGAGACTG           | CACGGATCTAG<br>CTCGGGTCATT        |
| 12-02 | 4  | 154702787 | <i>SFRP2</i>  | G | A | Coding | 62389 | 23501 | 67278 | N/A  | 228  | 6695 | 29967 | N/A  | TGACCAGATA<br>GGCGCGTTG           | AGGAGATAACC<br>TACATCAACCG<br>AGA |
| 12-03 | 11 | 533874    | <i>HRAS</i>   | T | C | Coding | 2388  | 4206  | 16186 | 1852 | 4    | 4110 | 1700  | 1325 | AGACTTGGTG<br>TTGTTGATGG<br>CAAAC | ACGGAAGGTCC<br>TGAGGGGGT          |
| 12-03 | 14 | 71209301  | <i>MAP3K9</i> | C | T | Coding | 20855 | 10403 | 12846 | 2504 | 34   | 9660 | 2427  | 1942 | GCTCCCGTTC<br>CAGGATGTCA<br>A     | CTCTCAGGCCT<br>CACCCCAG           |

---
