# Supplementary material
Source: PubMed Central journal article supplement (PMC5511561)
Supplement: NIHMS847247-supplement-4.pdf [file NIHMS847247-supplement-4.pdf]

**Supplementary Table S4. High frequency mutations unique to each Gp3 or Gp4 tumor focus.** For each focus of tumor, somatic mutations found in only one focus of tumor (Gp3 or Gp4, as indicated) are shown with the cancer cell fraction (CCF) for the mutant allele. To avoid misclassifying a shared mutation or undercovered germline SNP, mutations were considered exclusive if the other foci were covered at a power to conclude the mutation was not present (as described in Methods). Also shown is the reference and alternative allele depth for the matched benign control.

| Case  | Focus | Genomic Coordinates  | Classification    | Gene Symbol | Effect   | Description              | Normal coverage (freq.) | Tumor coverage (freq.) | Tumor CCF |
|-------|-------|----------------------|-------------------|-------------|----------|--------------------------|-------------------------|------------------------|-----------|
| 10-01 | Gp3   | g.chr2:219129752G>A  | Missense Mutation | AAMP        | p.A408V  | angio-associated, migrat | 17 (0.00)               | 31 (0.26)              | 0.69      |
| 10-01 | Gp3   | g.chr7:48563944C>G   | Missense Mutation | ABCA13      | p.L4718V | ATP-binding cassette, s1 | 75 (0.00)               | 31 (0.16)              | 0.43      |
| 10-01 | Gp3   | g.chr11:62287806C>A  | Missense Mutation | AHNAK       | p.V4695L | AHNAK nucleoprotein      | 23 (0.00)               | 28 (0.18)              | 0.48      |
| 10-01 | Gp3   | g.chr11:62292480G>A  | Missense Mutation | AHNAK       | p.P3137S | AHNAK nucleoprotein      | 44 (0.00)               | 45 (0.16)              | 0.41      |
| 10-01 | Gp3   | g.chr6:151674085C>T  | Missense Mutation | AKAP12      | p.A1520V | A kinase (PRKA) ancho    | 54 (0.00)               | 51 (0.16)              | 0.42      |
| 10-01 | Gp3   | g.chr2:202617894G>A  | Missense Mutation | ALS2        | p.S571F  | amyotrophic lateral scl  | 36 (0.00)               | 34 (0.15)              | 0.39      |
| 10-01 | Gp3   | g.chr11:10503646C>T  | Silent            | AMPD3       | p.L164L  | adenosine monophosph     | 32 (0.00)               | 29 (0.17)              | 0.46      |
| 10-01 | Gp3   | g.chr10:61833212G>A  | Missense Mutation | ANK3        | p.S2476F | ankyrin 3, node of Ran   | 34 (0.00)               | 28 (0.21)              | 0.57      |
| 10-01 | Gp3   | g.chr20:56798114G>A  | Silent            | ANKRD60     | p.P185P  | ankyrin repeat domain    | 624 (0.00)              | 32 (0.19)              | 0.50      |
| 10-01 | Gp3   | g.chr20:47628543C>A  | Missense Mutation | ARFGEF2     | p.N1280K | ADP-ribosylation factor  | 23 (0.00)               | 30 (0.20)              | 0.53      |
| 10-01 | Gp3   | g.chr19:42407881G>A  | Missense Mutation | ARHGEF1     | p.R636H  | Rho guanine nucleotide   | 27 (0.00)               | 51 (0.20)              | 0.52      |
| 10-01 | Gp3   | g.chr2:239353312C>A  | Nonsense Mutation | ASB1        | p.S174*  | ankyrin repeat and SOC   | 23 (0.00)               | 29 (0.17)              | 0.46      |
| 10-01 | Gp3   | g.chr7:105254421C>A  | Missense Mutation | ATXN7L1     | p.S787I  | ataxin 7-like 1          | 26 (0.00)               | 22 (0.27)              | 0.73      |
| 10-01 | Gp3   | g.chr12:668573G>A    | Nonsense Mutation | B4GALNT3    | p.W958*  | beta-1,4-N-acetyl-galact | 27 (0.00)               | 40 (0.15)              | 0.40      |
| 10-01 | Gp3   | g.chr11:27679871C>A  | Nonsense Mutation | BDNF        | p.E81*   | brain-derived neurotrop  | 24 (0.00)               | 41 (0.15)              | 0.39      |
| 10-01 | Gp3   | g.chr12:27234157C>A  | Missense Mutation | C12orf71    | p.G254C  | chromosome 12 open re    | 15 (0.00)               | 17 (0.35)              | 0.94      |
| 10-01 | Gp3   | g.chr8:86389428C>A   | Nonsense Mutation | CA2         | p.S196*  | carbonic anhydrase II    | 25 (0.00)               | 48 (0.17)              | 0.44      |
| 10-01 | Gp3   | g.chr3:85440808C>T   | Intron            | CADM2       |          | cell adhesion molecule   | 232 (0.03)              | 26 (0.19)              | 0.51      |
| 10-01 | Gp3   | g.chr3:85517111C>T   | Intron            | CADM2       |          | cell adhesion molecule   | 253 (0.00)              | 53 (0.17)              | 0.45      |
| 10-01 | Gp3   | g.chr3:85567132G>A   | Intron            | CADM2       |          | cell adhesion molecule   | 228 (0.00)              | 27 (0.26)              | 0.69      |
| 10-01 | Gp3   | g.chr2:179770062G>A  | Missense Mutation | CCDC141     | p.S420F  | coiled-coil domain cont  | 52 (0.02)               | 31 (0.16)              | 0.43      |
| 10-01 | Gp3   | g.chr4:77969527C>T   | Missense Mutation | CCNI        | p.E327K  | cyclin I                 | 64 (0.00)               | 61 (0.15)              | 0.39      |
| 10-01 | Gp3   | g.chr11:125859609G>A | Missense Mutation | CDON        | p.S899F  | cell adhesion associated | 39 (0.00)               | 29 (0.17)              | 0.46      |
| 10-01 | Gp3   | g.chr13:25459486G>T  | Missense Mutation | CENPJ       | p.F1135L | centromere protein J     | 50 (0.00)               | 41 (0.15)              | 0.39      |
| 10-01 | Gp3   | g.chr12:10215739C>T  | Silent            | CLEC9A      | p.H135H  | C-type lectin domain fa  | 21 (0.00)               | 23 (0.22)              | 0.58      |

|       |     |                     |                   |          |          |                                     |           |      |
|-------|-----|---------------------|-------------------|----------|----------|-------------------------------------|-----------|------|
| 10-01 | Gp3 | g.chr6:25087146C>T  | RNA               | CMAHP    |          | cytidine monophospho-126 (0.00)     | 42 (0.14) | 0.38 |
| 10-01 | Gp3 | g.chr2:208994346G>A | Missense Mutation | CRYGC    | p.P24L   | crystallin, gamma C 60 (0.00)       | 65 (0.18) | 0.49 |
| 10-01 | Gp3 | g.chr15:75982110C>T | Silent            | CSPG4    | p.L432L  | chondroitin sulfate prote 21 (0.00) | 25 (0.20) | 0.53 |
| 10-01 | Gp3 | g.chr19:41707182T>G | Missense Mutation | CYP2S1   | p.M294R  | cytochrome P450, famil 20 (0.00)    | 28 (0.18) | 0.48 |
| 10-01 | Gp3 | g.chr9:124434229G>A | Intron            | DAB2IP   |          | DAB2 interacting protei 41 (0.00)   | 46 (0.15) | 0.41 |
| 10-01 | Gp3 | g.chr9:124434852C>T | Intron            | DAB2IP   |          | DAB2 interacting protei 21 (0.00)   | 29 (0.17) | 0.46 |
| 10-01 | Gp3 | g.chr9:37861161G>A  | Missense Mutation | DCAF10   | p.E446K  | DDB1 and CUL4 associ 33 (0.00)      | 39 (0.15) | 0.41 |
| 10-01 | Gp3 | g.chr6:24301992G>T  | Missense Mutation | DCDC2    | p.L170I  | doublecortin domain coi 38 (0.00)   | 38 (0.16) | 0.42 |
| 10-01 | Gp3 | g.chr12:31253965C>T | Silent            | DDX11    | p.H651H  | DEAD/H (Asp-Glu-Ala) 28 (0.00)      | 37 (0.22) | 0.58 |
| 10-01 | Gp3 | g.chr2:169952153C>T | Missense Mutation | DHRS9    | p.T279I  | dehydrogenase/reductas 35 (0.03)    | 24 (0.21) | 0.56 |
| 10-01 | Gp3 | g.chr6:83839085C>A  | Missense Mutation | DOPEY1   | p.N733K  | dopey family member 1 36 (0.00)     | 33 (0.15) | 0.40 |
| 10-01 | Gp3 | g.chr3:128753063C>A | Missense Mutation | EFCC1    | p.A447D  | EF-hand and coiled-coil 20 (0.00)   | 35 (0.14) | 0.38 |
| 10-01 | Gp3 | g.chr19:39127542C>G | Missense Mutation | EIF3K    | p.I126M  | eukaryotic translation in 22 (0.00) | 28 (0.18) | 0.48 |
| 10-01 | Gp3 | g.chrX:154130404C>A | Nonsense Mutation | F8       | p.G2013* | coagulation factor VIII, 30 (0.00)  | 21 (0.24) | 0.40 |
| 10-01 | Gp3 | g.chr4:187540380G>A | Missense Mutation | FAT1     | p.R2454W | FAT atypical cadherin 1 70 (0.00)   | 54 (0.35) | 0.94 |
| 10-01 | Gp3 | g.chr5:127645706G>A | Silent            | FBN2     | p.Y1723Y | fibrillin 2 25 (0.00)               | 42 (0.14) | 0.38 |
| 10-01 | Gp3 | g.chrX:131216410C>T | Missense Mutation | FRMD7    | p.G296S  | FERM domain containi 36 (0.00)      | 35 (0.34) | 0.57 |
| 10-01 | Gp3 | g.chr3:179119060C>G | Missense Mutation | GNB4     | p.D322H  | guanine nucleotide bind 55 (0.00)   | 41 (0.15) | 0.39 |
| 10-01 | Gp3 | g.chr7:126544062C>A | Missense Mutation | GRM8     | p.A328S  | glutamate receptor, met 24 (0.00)   | 24 (0.21) | 0.56 |
| 10-01 | Gp3 | g.chr8:130774931G>T | Missense Mutation | GSDMC    | p.T206N  | gasdermin C 32 (0.00)               | 47 (0.13) | 0.41 |
| 10-01 | Gp3 | g.chr11:93796813G>A | Silent            | HEPHL1   | p.V185V  | hephaestin-like 1 38 (0.00)         | 35 (0.14) | 0.38 |
| 10-01 | Gp3 | g.chr19:46832533G>A | Missense Mutation | HIF3A    | p.A504T  | hypoxia inducible factor 28 (0.00)  | 28 (0.18) | 0.48 |
| 10-01 | Gp3 | g.chr10:71144612C>T | Missense Mutation | HK1      | p.P594S  | hexokinase 1 19 (0.00)              | 25 (0.20) | 0.53 |
| 10-01 | Gp3 | g.chr22:35789481C>T | Missense Mutation | HMOX1    | p.P253S  | heme oxygenase (decyc) 39 (0.00)    | 27 (0.19) | 0.49 |
| 10-01 | Gp3 | g.chr1:23637462C>T  | Missense Mutation | HNRNPR   | p.D466N  | heterogeneous nuclear r 24 (0.00)   | 27 (0.22) | 0.59 |
| 10-01 | Gp3 | g.chr2:231973508G>A | Missense Mutation | HTR2B    | p.A390V  | 5-hydroxytryptamine (ser 46 (0.00)  | 31 (0.16) | 0.43 |
| 10-01 | Gp3 | g.chr6:52884123G>T  | Silent            | ICK      | p.L131L  | intestinal cell (MAK-lik 29 (0.00)  | 23 (0.22) | 0.58 |
| 10-01 | Gp3 | g.chr6:52884126G>A  | Silent            | ICK      | p.N130N  | intestinal cell (MAK-lik 30 (0.00)  | 22 (0.23) | 0.61 |
| 10-01 | Gp3 | g.chr15:65622724C>G | Missense Mutation | IGDCC3   | p.V589L  | immunoglobulin superfe 22 (0.00)    | 20 (0.25) | 0.67 |
| 10-01 | Gp3 | g.chr4:143308334C>T | Intron            | INPP4B   |          | inositol polyphosphate- 48 (0.02)   | 47 (0.15) | 0.40 |
| 10-01 | Gp3 | g.chr4:143751676G>A | Intron            | INPP4B   |          | inositol polyphosphate- 29 (0.00)   | 26 (0.27) | 0.72 |
| 10-01 | Gp3 | g.chr2:201369552G>A | Silent            | KCTD18   | p.I97I   | potassium channel tetra 27 (0.00)   | 34 (0.18) | 0.47 |
| 10-01 | Gp3 | g.chr4:123192317G>A | Silent            | KIAA1109 | p.K2546K | KIAA1109 23 (0.00)                  | 17 (0.29) | 0.78 |
| 10-01 | Gp3 | g.chrX:69516908G>A  | Missense Mutation | KIF4A    | p.G99E   | kinesin family member 1 19 (0.00)   | 19 (0.26) | 0.44 |
| 10-01 | Gp3 | g.chr19:51506432G>A | Missense Mutation | KLK9     | p.R230C  | kallikrein-related peptid 15 (0.00) | 38 (0.16) | 0.42 |
| 10-01 | Gp3 | g.chr13:76382060G>A | Nonsense Mutation | LMO7     | p.W314*  | LIM domain 7 62 (0.00)              | 46 (0.20) | 0.52 |

|       |     |                     |                   |         |          |                           |           |           |      |
|-------|-----|---------------------|-------------------|---------|----------|---------------------------|-----------|-----------|------|
| 10-01 | Gp3 | g.chr7:77770299G>A  | Intron            | MAGI2   |          | membrane associated gu    | 19 (0.00) | 31 (0.19) | 0.52 |
| 10-01 | Gp3 | g.chr7:77773950C>T  | Intron            | MAGI2   |          | membrane associated gu    | 24 (0.00) | 36 (0.17) | 0.44 |
| 10-01 | Gp3 | g.chr7:77991803G>A  | Intron            | MAGI2   |          | membrane associated gu    | 73 (0.00) | 48 (0.17) | 0.44 |
| 10-01 | Gp3 | g.chr7:78554059C>A  | Intron            | MAGI2   |          | membrane associated gu    | 18 (0.00) | 30 (0.17) | 0.44 |
| 10-01 | Gp3 | g.chr7:78750926C>T  | Intron            | MAGI2   |          | membrane associated gu    | 39 (0.00) | 22 (0.41) | 1.09 |
| 10-01 | Gp3 | g.chr7:78956693G>A  | Intron            | MAGI2   |          | membrane associated gu    | 48 (0.00) | 63 (0.16) | 0.42 |
| 10-01 | Gp3 | g.chr1:38261466C>A  | Nonsense Mutation | MANEAL  | p.S203*  | mannosidase, endo-alpha   | 26 (0.00) | 20 (0.25) | 0.67 |
| 10-01 | Gp3 | g.chr8:99019726G>A  | Silent            | MATN2   | p.L490L  | matrilin 2                | 33 (0.00) | 40 (0.15) | 0.40 |
| 10-01 | Gp3 | g.chr8:67789741G>A  | Missense Mutation | MCMDC2  | p.R148K  | minichromosome mainte     | 26 (0.00) | 32 (0.19) | 0.50 |
| 10-01 | Gp3 | g.chr6:90499573C>A  | Missense Mutation | MDN1    | p.G386C  | MDN1, midasin homolo      | 36 (0.00) | 43 (0.16) | 0.43 |
| 10-01 | Gp3 | g.chr17:74771205C>T | Missense Mutation | MFS11   | p.P334L  | major facilitator superfa | 24 (0.00) | 28 (0.18) | 0.48 |
| 10-01 | Gp3 | g.chr7:141722104C>T | Silent            | MGAM    | p.D249D  | maltase-glucoamylase (;   | 35 (0.00) | 33 (0.15) | 0.40 |
| 10-01 | Gp3 | g.chr7:141791841G>A | Missense Mutation | MGAM    | p.M2313I | maltase-glucoamylase (;   | 73 (0.00) | 22 (0.27) | 0.73 |
| 10-01 | Gp3 | g.chr14:39716740G>A | Missense Mutation | MIA2    | p.G321E  | melanoma inhibitory act   | 44 (0.00) | 37 (0.19) | 0.50 |
| 10-01 | Gp3 | g.chr19:9057790C>A  | Nonsense Mutation | MUC16   | p.E9886* | mucin 16, cell surface a  | 21 (0.00) | 19 (0.26) | 0.70 |
| 10-01 | Gp3 | g.chr17:10450857T>C | Missense Mutation | MYH2    | p.T95A   | myosin, heavy chain 2, ;  | 34 (0.00) | 34 (0.24) | 0.63 |
| 10-01 | Gp3 | g.chr17:15965088C>T | Silent            | NCOR1   | p.V1836V | nuclear receptor corepre  | 83 (0.00) | 34 (0.21) | 0.55 |
| 10-01 | Gp3 | g.chr2:152467370G>A | Missense Mutation | NEB     | p.T3939I | nebulin                   | 42 (0.00) | 45 (0.16) | 0.41 |
| 10-01 | Gp3 | g.chr19:56307548C>T | Missense Mutation | NLRP11  | p.S747N  | NLR family, pyrin dom     | 19 (0.00) | 17 (0.29) | 0.78 |
| 10-01 | Gp3 | g.chr16:14975421C>T | Missense Mutation | NOMO1   | p.S969F  | NODAL modulator 1         | 25 (0.00) | 23 (0.22) | 0.72 |
| 10-01 | Gp3 | g.chr4:164271621C>A | Missense Mutation | NPY5R   | p.L66I   | neuropeptide Y receptor   | 79 (0.00) | 49 (0.14) | 0.38 |
| 10-01 | Gp3 | g.chr2:50692672G>A  | Missense Mutation | NRXN1   | p.S1131L | neurexin 1                | 38 (0.00) | 32 (0.22) | 0.58 |
| 10-01 | Gp3 | g.chr11:6912839G>A  | Missense Mutation | OR2D2   | p.A298V  | olfactory receptor, famil | 18 (0.00) | 21 (0.24) | 0.63 |
| 10-01 | Gp3 | g.chr11:59271873C>T | Silent            | OR4D11  | p.F275F  | olfactory receptor, famil | 20 (0.00) | 35 (0.14) | 0.38 |
| 10-01 | Gp3 | g.chr11:5424628C>A  | Missense Mutation | OR51J1  | p.H268N  | olfactory receptor, famil | 30 (0.00) | 33 (0.15) | 0.40 |
| 10-01 | Gp3 | g.chr11:5410999C>G  | Missense Mutation | OR51M1  | p.S124C  | olfactory receptor, famil | 31 (0.00) | 34 (0.21) | 0.55 |
| 10-01 | Gp3 | g.chr11:55606372G>A | Missense Mutation | OR5D16  | p.V49M   | olfactory receptor, famil | 41 (0.00) | 34 (0.15) | 0.39 |
| 10-01 | Gp3 | g.chr5:140773089G>A | Missense Mutation | PCDHGA8 | p.D237N  | protocadherin gamma st    | 35 (0.00) | 34 (0.15) | 0.39 |
| 10-01 | Gp3 | g.chr16:70180102C>T | Missense Mutation | PDPR    | p.P645S  | pyruvate dehydrogenase    | 26 (0.00) | 33 (0.27) | 0.73 |
| 10-01 | Gp3 | g.chr17:7139154C>G  | Missense Mutation | PHF23   | p.D205H  | PHD finger protein 23     | 40 (0.00) | 44 (0.18) | 0.48 |
| 10-01 | Gp3 | g.chr18:60444107T>C | Intron            | PHLPP1  |          | PH domain and leucine     | 26 (0.00) | 30 (0.17) | 0.44 |
| 10-01 | Gp3 | g.chr18:60587111G>T | Intron            | PHLPP1  |          | PH domain and leucine     | 54 (0.00) | 28 (0.21) | 0.57 |
| 10-01 | Gp3 | g.chr22:21087278G>A | Silent            | PI4KA   | p.A1423A | phosphatidylinositol 4-k  | 15 (0.00) | 23 (0.22) | 0.58 |
| 10-01 | Gp3 | g.chr7:75140394C>A  | RNA               | PMS2P3  |          | postmeiotic segregation   | 49 (0.00) | 40 (0.15) | 0.40 |
| 10-01 | Gp3 | g.chr7:75145492G>A  | RNA               | PMS2P3  |          | postmeiotic segregation   | 17 (0.00) | 23 (0.26) | 0.70 |
| 10-01 | Gp3 | g.chr14:39649838G>A | Missense Mutation | PNN     | p.E309K  | pinin, desmosome assoc    | 28 (0.00) | 26 (0.19) | 0.51 |

|       |     |                      |                   |               |          |                                                         |            |           |      |
|-------|-----|----------------------|-------------------|---------------|----------|---------------------------------------------------------|------------|-----------|------|
| 10-01 | Gp3 | g.chr2:113309556G>A  | Missense Mutation | POLR1B        | p.A267T  | polymerase (RNA) I pol31                                | 0.00       | 42 (0.17) | 0.44 |
| 10-01 | Gp3 | g.chr14:30102078G>A  | Silent            | PRKD1         | p.Y463Y  | protein kinase D1                                       | 18 (0.00)  | 21 (0.24) | 0.63 |
| 10-01 | Gp3 | g.chr4:148559718G>T  | Missense Mutation | PRMT10        | p.H835N  |                                                         | 79 (0.00)  | 36 (0.17) | 0.44 |
| 10-01 | Gp3 | g.chr2:95953154G>A   | Missense Mutation | PROM2         | p.C729Y  | prominin 2                                              | 23 (0.00)  | 36 (0.17) | 0.44 |
| 10-01 | Gp3 | g.chr9:79325065C>T   | Missense Mutation | PRUNE2        | p.E709K  | prune homolog 2 (Drosophila)                            | 19 (0.00)  | 33 (0.24) | 0.65 |
| 10-01 | Gp3 | g.chr7:77265569G>A   | Intron            | PTPN12        |          | protein tyrosine phosphatase 42                         | 42 (0.00)  | 38 (0.16) | 0.42 |
| 10-01 | Gp3 | g.chr20:34241079G>A  | Silent            | RBM12         | p.N722N  | RNA binding motif protein 18                            | 18 (0.00)  | 32 (0.19) | 0.50 |
| 10-01 | Gp3 | g.chr17:73658855C>A  | Missense Mutation | RECQL5        | p.A159S  | RecQ protein-like 5                                     | 27 (0.00)  | 30 (0.17) | 0.44 |
| 10-01 | Gp3 | g.chr6:72968794G>A   | Silent            | RIMS1         | p.Q1011Q | regulating synaptic membrane protein 51                 | 51 (0.00)  | 30 (0.17) | 0.44 |
| 10-01 | Gp3 | g.chr1:148939806T>G  | lincRNA           | RP11-14N7.2   |          |                                                         | 19 (0.00)  | 22 (0.27) | 0.73 |
| 10-01 | Gp3 | g.chr3:139128513T>A  | RNA               | RP11-319G6.1  |          |                                                         | 28 (0.00)  | 18 (0.28) | 0.49 |
| 10-01 | Gp3 | g.chr3:98030912C>T   | lincRNA           | RP11-325B23.2 |          |                                                         | 29 (0.00)  | 28 (0.21) | 0.57 |
| 10-01 | Gp3 | g.chr3:38616857G>A   | Silent            | SCN5A         | p.Y1198Y | sodium channel, voltage-gated type I                    | 28 (0.00)  | 28 (0.18) | 0.48 |
| 10-01 | Gp3 | g.chr6:25811660C>T   | Missense Mutation | SLC17A1       | p.G382R  | solute carrier family 17 member 1                       | 50 (0.00)  | 32 (0.16) | 0.42 |
| 10-01 | Gp3 | g.chr1:153751848C>T  | Silent            | SLC27A3       | p.L720L  | solute carrier family 27 member 3                       | 27 (0.00)  | 49 (0.14) | 0.38 |
| 10-01 | Gp3 | g.chr10:73121930G>A  | Silent            | SLC29A3       | p.E331E  | solute carrier family 29 member 3                       | 20 (0.00)  | 29 (0.21) | 0.55 |
| 10-01 | Gp3 | g.chr4:20620478G>A   | Missense Mutation | SLIT2         | p.R1479Q | slit homolog 2 (Drosophila)                             | 24 (0.00)  | 41 (0.15) | 0.39 |
| 10-01 | Gp3 | g.chr17:1715350G>A   | Missense Mutation | SMYD4         | p.S65L   | SET and MYND domain-containing protein 4                | 38 (0.00)  | 33 (0.18) | 0.48 |
| 10-01 | Gp3 | g.chr8:121551190C>A  | Missense Mutation | SNTB1         | p.C515F  | syntrophin, beta 1 (dystrophin-binding protein 1)       | 43 (0.00)  | 26 (0.19) | 0.51 |
| 10-01 | Gp3 | g.chr2:228884208C>T  | Silent            | SPHKAP        | p.Q454Q  | SPHK1 interactor, AKA1                                  | 18 (0.00)  | 21 (0.24) | 0.63 |
| 10-01 | Gp3 | g.chr12:64502809C>G  | Missense Mutation | SRGAP1        | p.F637L  | SLIT-ROBO Rho GTPase-activating protein 1               | 30 (0.00)  | 37 (0.19) | 0.50 |
| 10-01 | Gp3 | g.chr4:98633884G>A   | Missense Mutation | STPG2         | p.S429F  | sperm-tail PG-rich repeat domain-containing protein 2   | 100 (0.00) | 73 (0.15) | 0.40 |
| 10-01 | Gp3 | g.chr13:48563103G>A  | Silent            | SUCLA2        | p.V95V   | succinate-CoA ligase, A16                               | 16 (0.00)  | 31 (0.16) | 0.43 |
| 10-01 | Gp3 | g.chr1:33160499C>T   | Silent            | SYNC          | p.R400R  | syncoilin, intermediate filament-associated protein 165 | 165 (0.00) | 64 (0.16) | 0.42 |
| 10-01 | Gp3 | g.chr1:155838187G>A  | Missense Mutation | SYT11         | p.V156I  | synaptotagmin XI                                        | 24 (0.00)  | 44 (0.16) | 0.42 |
| 10-01 | Gp3 | g.chr9:32631119G>T   | Missense Mutation | TAF1L         | p.Q1487K | TAF1 RNA polymerase II subunit 1                        | 27 (0.00)  | 24 (0.21) | 0.56 |
| 10-01 | Gp3 | g.chr11:33087388G>A  | Missense Mutation | TCP11L1       | p.D329N  | t-complex 11, testis-specific                           | 38 (0.00)  | 40 (0.15) | 0.40 |
| 10-01 | Gp3 | g.chr12:106712238G>A | Missense Mutation | TCP11L2       | p.R137K  | t-complex 11, testis-specific                           | 40 (0.00)  | 30 (0.17) | 0.44 |
| 10-01 | Gp3 | g.chr3:52257115G>T   | Silent            | TLR9          | p.G559G  | toll-like receptor 9                                    | 17 (0.00)  | 16 (0.44) | 1.17 |
| 10-01 | Gp3 | g.chrX:101770040G>A  | Silent            | TMSB15A       | p.L18L   | thymosin beta 15a                                       | 53 (0.00)  | 25 (0.36) | 0.60 |
| 10-01 | Gp3 | g.chr17:38652276G>T  | Silent            | TNS4          | p.T134T  | tensin 4                                                | 34 (0.00)  | 37 (0.22) | 0.58 |
| 10-01 | Gp3 | g.chr5:180627015C>A  | Nonsense Mutation | TRIM7         | p.E229*  | tripartite motif containing protein 7                   | 16 (0.00)  | 22 (0.23) | 0.61 |
| 10-01 | Gp3 | g.chr4:70359441G>A   | Silent            | UGT2B4        | p.L280L  | UDP glucuronosyltransferase 2B4                         | 43 (0.00)  | 38 (0.34) | 0.91 |
| 10-01 | Gp3 | g.chr19:17722601C>T  | Missense Mutation | UNC13A        | p.G1541E | unc-13 homolog A (Caenorhabditis elegans)               | 39 (0.00)  | 51 (0.16) | 0.42 |
| 10-01 | Gp3 | g.chr3:14212086C>T   | Intron            | XPC           |          | xeroderma pigmentosum complementation group C           | 40 (0.00)  | 34 (0.15) | 0.39 |
| 10-01 | Gp3 | g.chr10:27412584C>G  | Missense Mutation | YME1L1        | p.A332P  | YME1-like 1 ATPase                                      | 52 (0.00)  | 40 (0.15) | 0.40 |

|       |     |                      |                   |          |          |                                    |              |           |      |
|-------|-----|----------------------|-------------------|----------|----------|------------------------------------|--------------|-----------|------|
| 10-01 | Gp3 | g.chr11:130131111G>A | Nonsense Mutation | ZBTB44   | p.Q220*  | zinc finger and BTB do             | 40 (0.00)    | 25 (0.20) | 0.53 |
| 10-01 | Gp3 | g.chr19:58353193G>A  | Missense Mutation | ZNF587B  | p.C384Y  | zinc finger protein 587B           | 27 (0.00)    | 29 (0.17) | 0.46 |
| 10-01 | Gp3 | g.chr19:22498518T>C  | Silent            | ZNF729   | p.L767L  | zinc finger protein 729            | 54 (0.00)    | 46 (0.15) | 0.41 |
| 10-01 | Gp3 | g.chr19:22498520G>C  | Missense Mutation | ZNF729   | p.L767F  | zinc finger protein 729            | 49 (0.00)    | 41 (0.15) | 0.39 |
| 10-01 | Gp3 | g.chr19:57956683C>G  | Missense Mutation | ZNF749   | p.P723A  | zinc finger protein 749            | 46 (0.00)    | 56 (0.14) | 0.38 |
| 10-01 | Gp3 | g.chr19:52658952C>T  | Missense Mutation | ZNF836   | p.G662R  | zinc finger protein 836            | 27 (0.00)    | 31 (0.16) | 0.43 |
| 10-01 | Gp3 | g.chr6:28359350G>A   | Silent            | ZSCAN12  | p.C239C  | zinc finger and SCAN d             | 56 (0.02)    | 48 (0.23) | 0.61 |
| 10-01 | Gp4 | g.chr17:67085605C>A  | Splice Site       | ABCA6    |          | ATP-binding cassette, s            | 143 (0.00)   | 23 (0.22) | 0.58 |
| 10-01 | Gp4 | g.chr16:20486750C>G  | Missense Mutation | ACSM2A   | p.Q321E  | acyl-CoA synthetase me             | 28 (0.00)    | 49 (0.16) | 0.44 |
| 10-01 | Gp4 | g.chr11:72421435G>A  | Silent            | ARAP1    | p.L471L  | ArfGAP with RhoGAP                 | 16 (0.00)    | 26 (0.23) | 0.62 |
| 10-01 | Gp4 | g.chr2:23985151C>T   | Missense Mutation | ATAD2B   | p.V1108I | ATPase family, AAA d               | 72 (0.01)    | 48 (0.17) | 0.44 |
| 10-01 | Gp4 | g.chr16:84495671G>A  | Silent            | ATP2C2   | p.Q915Q  | ATPase, Ca <sup>++</sup> transport | 45 (0.02)    | 49 (0.20) | 0.39 |
| 10-01 | Gp4 | g.chr3:133185762G>A  | Missense Mutation | BFSP2    | p.V328I  | beaded filament structur           | 43 (0.00)    | 35 (0.17) | 0.46 |
| 10-01 | Gp4 | g.chr14:36334957G>A  | Silent            | BRMS1L   | p.V239V  | breast cancer metastasis           | 30 (0.00)    | 26 (0.19) | 0.51 |
| 10-01 | Gp4 | g.chr15:76430172G>T  | Missense Mutation | C15orf27 | p.V55F   | chromosome 15 open re              | 50 (0.00)    | 85 (0.18) | 0.47 |
| 10-01 | Gp4 | g.chr12:22680775G>A  | Missense Mutation | C2CD5    | p.H77Y   | C2 calcium-dependent               | 32 (0.00)    | 21 (0.24) | 0.63 |
| 10-01 | Gp4 | g.chr9:35679189G>A   | Silent            | CA9      | p.E305E  | carbonic anhydrase IX              | 31 (0.00)    | 50 (0.16) | 0.43 |
| 10-01 | Gp4 | g.chr3:85392375C>T   | Intron            | CADM2    |          | cell adhesion molecule             | 257 (0.02)   | 35 (0.14) | 0.38 |
| 10-01 | Gp4 | g.chr1:200827183C>T  | Missense Mutation | CAMSAP2  | p.A1478V | calmodulin regulated sp            | 28 (0.00)    | 35 (0.14) | 0.38 |
| 10-01 | Gp4 | g.chr3:39374844G>A   | Missense Mutation | CCR8     | p.C341Y  | chemokine (C-C motif)              | 21 (0.00)    | 29 (0.24) | 0.64 |
| 10-01 | Gp4 | g.chr14:23523425C>G  | Silent            | CDH24    | p.L299L  | cadherin 24, type 2                | 25 (0.00)    | 40 (0.20) | 0.53 |
| 10-01 | Gp4 | g.chr15:93492293C>A  | Missense Mutation | CHD2     | p.H497N  | chromodomain helicase              | 44 (0.00)    | 36 (0.17) | 0.44 |
| 10-01 | Gp4 | g.chr11:99827700G>A  | Missense Mutation | CNTN5    | p.R279K  | contactin 5                        | 29 (0.00)    | 32 (0.16) | 0.42 |
| 10-01 | Gp4 | g.chr2:219677060C>A  | Silent            | CYP27A1  | p.R188R  | cytochrome P450, famil             | 25 (0.00)    | 36 (0.17) | 0.44 |
| 10-01 | Gp4 | g.chr9:124409624G>T  | Intron            | DAB2IP   |          | DAB2 interacting protei            | 50 (0.00)    | 60 (0.17) | 0.44 |
| 10-01 | Gp4 | g.chr11:30928254G>A  | Missense Mutation | DCDC1    | p.P1313S | doublecortin domain coi            | 18 (0.00)    | 33 (0.15) | 0.40 |
| 10-01 | Gp4 | g.chr5:134109534G>A  | Missense Mutation | DDX46    | p.S199N  | DEAD (Asp-Glu-Ala-A                | 24 (0.00)    | 35 (0.14) | 0.38 |
| 10-01 | Gp4 | g.chr11:9182280G>A   | Missense Mutation | DENND5A  | p.H806Y  | DENN/MADD domain                   | 19 (0.00)    | 32 (0.16) | 0.42 |
| 10-01 | Gp4 | g.chr10:124376751G>A | Nonsense Mutation | DMBT1    | p.W1493* | deleted in malignant bra           | 48 (0.00)    | 26 (0.19) | 0.51 |
| 10-01 | Gp4 | g.chr1:6696274C>A    | Silent            | DNAJC11  | p.V519V  | DnaJ (Hsp40) homolog,              | 21 (0.00)    | 20 (0.25) | 0.67 |
| 10-01 | Gp4 | g.chr3:19921235C>A   | Missense Mutation | EFHB     | p.W667L  | EF-hand domain family,             | 51 (0.00)    | 31 (0.16) | 0.43 |
| 10-01 | Gp4 | g.chr1:11129671T>C   | Silent            | EXOSC10  | p.P811P  | exosome component 10               | 57 (0.02)    | 49 (0.14) | 0.38 |
| 10-01 | Gp4 | g.chr5:150897262C>A  | Missense Mutation | FAT2     | p.W3794C | FAT atypical cadherin              | 221 (0.00)   | 24 (0.21) | 0.56 |
| 10-01 | Gp4 | g.chr5:56542276G>C   | Missense Mutation | GPBP1    | p.G217R  | GC-rich promoter bindi             | 73 (0.00)    | 83 (0.17) | 0.45 |
| 10-01 | Gp4 | g.chr2:203676499C>A  | Missense Mutation | ICA1L    | p.D294Y  | islet cell autoantigen             | 1,672 (0.00) | 42 (0.14) | 0.38 |

|       |     |                      |                   |          |          |                            |            |            |      |
|-------|-----|----------------------|-------------------|----------|----------|----------------------------|------------|------------|------|
| 10-01 | Gp4 | g.chr14:107211399C>G | RNA               | IGHV3-73 |          | immunoglobulin heavy       | 30 (0.00)  | 49 (0.14)  | 0.38 |
| 10-01 | Gp4 | g.chr2:191231564G>A  | Missense Mutation | INPP1    | p.D137N  | inositol polyphosphate-115 | 15 (0.00)  | 33 (0.18)  | 0.48 |
| 10-01 | Gp4 | g.chr4:143566427G>T  | Intron            | INPP4B   |          | inositol polyphosphate-2   | 30 (0.00)  | 34 (0.15)  | 0.39 |
| 10-01 | Gp4 | g.chr1:196311308G>T  | Missense Mutation | KCNT2    | p.S485Y  | potassium channel, subf    | 24 (0.00)  | 27 (0.22)  | 0.59 |
| 10-01 | Gp4 | g.chr1:44169995G>A   | Missense Mutation | KDM4A    | p.R1050Q | lysine (K)-specific dem    | 26 (0.00)  | 43 (0.16)  | 0.43 |
| 10-01 | Gp4 | g.chr11:93458851C>T  | Missense Mutation | KIAA1731 | p.T298I  | KIAA1731                   | 82 (0.00)  | 48 (0.17)  | 0.44 |
| 10-01 | Gp4 | g.chr4:1816171C>G    | Missense Mutation | LETM1    | p.V734L  | leucine zipper-EF-hand     | 16 (0.00)  | 36 (0.17)  | 0.44 |
| 10-01 | Gp4 | g.chr21:45876913C>A  | Missense Mutation | LRRC3    | p.P129H  | leucine rich repeat conta  | 16 (0.00)  | 24 (0.21)  | 0.56 |
| 10-01 | Gp4 | g.chr21:45876914C>A  | Silent            | LRRC3    | p.P129P  | leucine rich repeat conta  | 16 (0.00)  | 24 (0.21)  | 0.56 |
| 10-01 | Gp4 | g.chr7:78497872A>T   | Intron            | MAGI2    |          | membrane associated gu     | 42 (0.00)  | 48 (0.23)  | 0.61 |
| 10-01 | Gp4 | g.chr17:61766201G>A  | Silent            | MAP3K3   | p.R273R  | mitogen-activated protei   | 20 (0.00)  | 30 (0.20)  | 0.53 |
| 10-01 | Gp4 | g.chr7:99693416C>T   | Missense Mutation | MCM7     | p.D526N  | minichromosome mainte      | 36 (0.00)  | 35 (0.20)  | 0.53 |
| 10-01 | Gp4 | g.chr5:41051137C>A   | Missense Mutation | MROH2B   | p.R429L  | maestro heat-like repeat   | 20 (0.00)  | 34 (0.15)  | 0.39 |
| 10-01 | Gp4 | g.chr19:9064952G>A   | Silent            | MUC16    | p.D7498D | mucin 16, cell surface a   | 16 (0.00)  | 36 (0.17)  | 0.44 |
| 10-01 | Gp4 | g.chr17:8404250G>A   | Missense Mutation | MYH10    | p.A1182V | myosin, heavy chain 10,    | 70 (0.01)  | 50 (0.16)  | 0.43 |
| 10-01 | Gp4 | g.chr2:152534129C>A  | Missense Mutation | NEB      | p.D1242Y | nebulin                    | 36 (0.00)  | 29 (0.17)  | 0.46 |
| 10-01 | Gp4 | g.chr12:80733036G>A  | Missense Mutation | OTOGL    | p.G1660E | otogelin-like              | 25 (0.00)  | 31 (0.29)  | 0.77 |
| 10-01 | Gp4 | g.chr12:3921397G>A   | Silent            | PARP11   | p.S303S  | poly (ADP-ribose) poly     | 145 (0.00) | 21 (0.24)  | 0.49 |
| 10-01 | Gp4 | g.chr2:198953617C>T  | Silent            | PLCL1    | p.L917L  | phospholipase C-like 1     | 63 (0.02)  | 62 (0.16)  | 0.43 |
| 10-01 | Gp4 | g.chr9:8499758G>A    | Silent            | PTPRD    | p.P737P  | protein tyrosine phosph    | 65 (0.00)  | 46 (0.15)  | 0.41 |
| 10-01 | Gp4 | g.chr1:213434967A>G  | Missense Mutation | RPS6KC1  | p.E981G  | ribosomal protein S6 kir   | 17 (0.00)  | 32 (0.28)  | 0.75 |
| 10-01 | Gp4 | g.chr2:166245851C>T  | Silent            | SCN2A    | p.P1845P | sodium channel, voltage    | 46 (0.02)  | 50 (0.16)  | 0.43 |
| 10-01 | Gp4 | g.chr3:72828045C>G   | Intron            | SHQ1     |          | SHQ1, H/ACA ribonucl       | 113 (0.00) | 105 (0.27) | 0.71 |
| 10-01 | Gp4 | g.chr14:21469391C>T  | Missense Mutation | SLC39A2  | p.L195F  | solute carrier family 39   | 27 (0.00)  | 24 (0.25)  | 0.67 |
| 10-01 | Gp4 | g.chr2:92092832T>A   | RNA               | SLC9B1P2 |          | solute carrier family 9, s | 23 (0.00)  | 16 (0.31)  | 0.83 |
| 10-01 | Gp4 | g.chr6:170871052G>A  | Silent            | TBP      | p.Q76Q   | TATA box binding prot      | 15 (0.00)  | 26 (0.31)  | 0.82 |
| 10-01 | Gp4 | g.chr4:83839228G>A   | Silent            | THAP9    | p.Q621Q  | THAP domain containir      | 43 (0.00)  | 44 (0.16)  | 0.42 |
| 10-01 | Gp4 | g.chr15:63089448G>A  | Silent            | TLN2     | p.L2027L | talin 2                    | 47 (0.00)  | 34 (0.15)  | 0.39 |
| 10-01 | Gp4 | g.chr12:94976260C>T  | Missense Mutation | TMCC3    | p.G45R   | transmembrane and coil     | 23 (0.00)  | 31 (0.16)  | 0.43 |
| 10-01 | Gp4 | g.chr11:57077146G>A  | Silent            | TNKS1BP1 | p.S1013S | tankyrase 1 binding prot   | 16 (0.00)  | 34 (0.15)  | 0.39 |
| 10-01 | Gp4 | g.chr7:138252255G>A  | Silent            | TRIM24   | p.Q520Q  | tripartite motif containir | 44 (0.00)  | 31 (0.16)  | 0.43 |
| 10-01 | Gp4 | g.chr3:142731145G>T  | Nonsense Mutation | U2SURP   | p.E58*   | U2 snRNP-associated S      | 36 (0.00)  | 30 (0.20)  | 0.53 |
| 10-01 | Gp4 | g.chr2:234545421G>A  | Missense Mutation | UGT1A10  | p.D85N   | UDP glucuronosyltransf     | 27 (0.00)  | 29 (0.17)  | 0.46 |
| 10-01 | Gp4 | g.chr8:35608225C>T   | Silent            | UNC5D    | p.A618A  | unc-5 homolog D (C. el     | 29 (0.00)  | 25 (0.24)  | 0.64 |
| 11-01 | Gp3 | g.chr10:52569802G>A  | Splice Site       | A1CF     | p.I495I  | APOBEC1 complement 61      | 61 (0.00)  | 28 (0.18)  | 0.48 |

|       |     |                      |                   |         |          |                           |            |            |      |
|-------|-----|----------------------|-------------------|---------|----------|---------------------------|------------|------------|------|
| 11-01 | Gp3 | g.chr12:9229495G>A   | Missense Mutation | A2M     | p.S1130L | alpha-2-macroglobulin     | 67 (0.00)  | 28 (0.32)  | 0.86 |
| 11-01 | Gp3 | g.chr12:9002786C>T   | Missense Mutation | A2ML1   | p.S717L  | alpha-2-macroglobulin-l95 | (0.01)     | 93 (0.30)  | 0.80 |
| 11-01 | Gp3 | g.chr12:9013893G>A   | Splice Site       | A2ML1   | p.G1168R | alpha-2-macroglobulin-l43 | (0.00)     | 25 (0.24)  | 0.64 |
| 11-01 | Gp3 | g.chr3:151474835C>A  | Missense Mutation | AADACL2 | p.P220H  | arylacetamide deacetyla   | 22 (0.00)  | 18 (0.28)  | 0.74 |
| 11-01 | Gp3 | g.chr1:12779548G>T   | Silent            | AADACL3 | p.P23P   | arylacetamide deacetyla   | 86 (0.00)  | 86 (0.15)  | 0.40 |
| 11-01 | Gp3 | g.chr8:117954909G>T  | Missense Mutation | AARD    | p.S146I  | alanine and arginine ricl | 18 (0.00)  | 25 (0.20)  | 0.53 |
| 11-01 | Gp3 | g.chr17:41102732G>C  | Missense Mutation | AARSD1  | p.L373V  | alanyl-tRNA synthetase    | 15 (0.00)  | 17 (0.29)  | 0.78 |
| 11-01 | Gp3 | g.chr7:121721622C>A  | Missense Mutation | AASS    | p.V738L  | aminoadipate-semialdeh    | 44 (0.00)  | 41 (0.20)  | 0.52 |
| 11-01 | Gp3 | g.chr9:107584912C>T  | Missense Mutation | ABCA1   | p.G898D  | ATP-binding cassette, s1  | 21 (0.00)  | 35 (0.86)  | 2.29 |
| 11-01 | Gp3 | g.chr9:107591368C>T  | Nonsense Mutation | ABCA1   | p.W648*  | ATP-binding cassette, s1  | 38 (0.00)  | 30 (0.17)  | 0.44 |
| 11-01 | Gp3 | g.chr9:107593207T>C  | Splice Site       | ABCA1   | p.I631V  | ATP-binding cassette, s1  | 96 (0.00)  | 34 (0.15)  | 0.39 |
| 11-01 | Gp3 | g.chr17:67150020G>T  | Missense Mutation | ABCA10  | p.A1306E | ATP-binding cassette, s1  | 103 (0.00) | 73 (0.18)  | 0.47 |
| 11-01 | Gp3 | g.chr7:48314706G>A   | Missense Mutation | ABCA13  | p.A1815T | ATP-binding cassette, s1  | 64 (0.00)  | 41 (0.29)  | 0.78 |
| 11-01 | Gp3 | g.chr7:48391861C>T   | Missense Mutation | ABCA13  | p.R3489W | ATP-binding cassette, s1  | 35 (0.00)  | 28 (0.43)  | 1.14 |
| 11-01 | Gp3 | g.chr7:48431615G>A   | Missense Mutation | ABCA13  | p.G3918S | ATP-binding cassette, s1  | 50 (0.00)  | 53 (0.25)  | 0.65 |
| 11-01 | Gp3 | g.chr1:94473189C>T   | Splice Site       | ABCA4   |          | ATP-binding cassette, s1  | 56 (0.00)  | 33 (0.21)  | 0.57 |
| 11-01 | Gp3 | g.chr1:94514499C>T   | Missense Mutation | ABCA4   | p.E890K  | ATP-binding cassette, s1  | 32 (0.00)  | 15 (0.40)  | 1.07 |
| 11-01 | Gp3 | g.chr1:94526129C>G   | Missense Mutation | ABCA4   | p.M708I  | ATP-binding cassette, s1  | 49 (0.00)  | 48 (0.19)  | 0.50 |
| 11-01 | Gp3 | g.chr1:94526275C>T   | Missense Mutation | ABCA4   | p.V660M  | ATP-binding cassette, s1  | 20 (0.00)  | 32 (0.16)  | 0.42 |
| 11-01 | Gp3 | g.chr17:67012498G>C  | Missense Mutation | ABCA9   | p.R979G  | ATP-binding cassette, s1  | 36 (0.00)  | 34 (0.26)  | 0.71 |
| 11-01 | Gp3 | g.chr2:169788957G>C  | Missense Mutation | ABCB11  | p.A1048G | ATP-binding cassette, s1  | 127 (0.00) | 82 (0.33)  | 0.88 |
| 11-01 | Gp3 | g.chr2:169824975C>A  | Silent            | ABCB11  | p.A679A  | ATP-binding cassette, s1  | 101 (0.01) | 56 (0.20)  | 0.52 |
| 11-01 | Gp3 | g.chr2:169836388C>A  | Missense Mutation | ABCB11  | p.E395D  | ATP-binding cassette, s1  | 50 (0.00)  | 30 (0.37)  | 0.98 |
| 11-01 | Gp3 | g.chr7:87038599C>T   | Missense Mutation | ABCB4   | p.E1012K | ATP-binding cassette, s1  | 82 (0.00)  | 53 (0.21)  | 0.55 |
| 11-01 | Gp3 | g.chr7:87049342G>A   | Missense Mutation | ABCB4   | p.S789L  | ATP-binding cassette, s1  | 64 (0.00)  | 31 (0.29)  | 0.77 |
| 11-01 | Gp3 | g.chr16:16205319G>A  | Missense Mutation | ABCC1   | p.V987M  | ATP-binding cassette, s1  | 29 (0.00)  | 19 (0.32)  | 0.84 |
| 11-01 | Gp3 | g.chr16:48227838C>T  | Silent            | ABCC11  | p.T820T  | ATP-binding cassette, s1  | 69 (0.00)  | 56 (0.25)  | 0.67 |
| 11-01 | Gp3 | g.chr10:101560189G>A | Missense Mutation | ABCC2   | p.G360R  | ATP-binding cassette, s1  | 180 (0.01) | 84 (0.30)  | 0.79 |
| 11-01 | Gp3 | g.chr10:101571347C>A | Missense Mutation | ABCC2   | p.A652D  | ATP-binding cassette, s1  | 35 (0.00)  | 44 (0.23)  | 0.61 |
| 11-01 | Gp3 | g.chr13:95714961A>C  | Silent            | ABCC4   | p.P1121P | ATP-binding cassette, s1  | 71 (0.00)  | 45 (0.16)  | 0.41 |
| 11-01 | Gp3 | g.chr12:40012847G>C  | Missense Mutation | ABCD2   | p.Q191E  | ATP-binding cassette, s1  | 34 (0.00)  | 33 (0.48)  | 1.29 |
| 11-01 | Gp3 | g.chr12:40013182C>T  | Missense Mutation | ABCD2   | p.G79E   | ATP-binding cassette, s1  | 41 (0.00)  | 25 (0.24)  | 0.64 |
| 11-01 | Gp3 | g.chr1:94980739C>T   | Missense Mutation | ABCD3   | p.S628F  | ATP-binding cassette, s1  | 47 (0.00)  | 35 (0.14)  | 0.38 |
| 11-01 | Gp3 | g.chr14:74766260C>T  | Silent            | ABCD4   | p.L92L   | ATP-binding cassette, s1  | 107 (0.00) | 109 (0.23) | 0.61 |
| 11-01 | Gp3 | g.chr21:43646003G>A  | Missense Mutation | ABCG1   | p.G89R   | ATP-binding cassette, s1  | 51 (0.00)  | 40 (0.35)  | 0.93 |

|       |     |                      |                   |            |          |                                             |           |      |
|-------|-----|----------------------|-------------------|------------|----------|---------------------------------------------|-----------|------|
| 11-01 | Gp3 | g.chr2:44051449C>G   | Missense Mutation | ABCG5      | p.E172Q  | ATP-binding cassette, subfamily 36 (0.00)   | 14 (0.36) | 0.95 |
| 11-01 | Gp3 | g.chr3:100489651G>T  | Silent            | ABI3BP     | p.T848T  | ABI family, member 3 (63 (0.00)             | 59 (0.24) | 0.63 |
| 11-01 | Gp3 | g.chr9:133729574C>T  | Missense Mutation | ABL1       | p.A68V   | ABL proto-oncogene 1, 81 (0.00)             | 42 (0.52) | 1.40 |
| 11-01 | Gp3 | g.chr9:133748254C>T  | Silent            | ABL1       | p.C305C  | ABL proto-oncogene 1, 26 (0.00)             | 44 (0.45) | 1.21 |
| 11-01 | Gp3 | g.chr5:148617026G>T  | Nonsense Mutation | ABLIM3     | p.E302*  | actin binding LIM prote 59 (0.00)           | 23 (0.30) | 0.81 |
| 11-01 | Gp3 | g.chr17:995070G>A    | Silent            | ABR        | p.A122A  | active BCR-related 22 (0.00)                | 17 (0.35) | 0.94 |
| 11-01 | Gp3 | g.chr3:127395393C>T  | Silent            | ABTB1      | p.A165A  | ankyrin repeat and BTB 37 (0.00)            | 30 (0.17) | 0.44 |
| 11-01 | Gp3 | g.chr16:20843514C>T  | Nonsense Mutation | AC004381.6 | p.Q399*  | 52 (0.00)                                   | 32 (0.31) | 0.83 |
| 11-01 | Gp3 | g.chr16:20856404G>A  | Silent            | AC004381.6 | p.Q655Q  | 58 (0.02)                                   | 38 (0.18) | 0.49 |
| 11-01 | Gp3 | g.chr17:28903207G>T  | RNA               | AC006050.2 |          | 18 (0.00)                                   | 12 (0.67) | 1.78 |
| 11-01 | Gp3 | g.chr2:58688722C>A   | lincRNA           | AC007092.1 |          | 57 (0.00)                                   | 52 (0.17) | 0.46 |
| 11-01 | Gp3 | g.chr7:131626093G>T  | lincRNA           | AC009518.4 |          | 47 (0.00)                                   | 26 (0.23) | 0.62 |
| 11-01 | Gp3 | g.chr2:130792397C>A  | RNA               | AC018865.8 |          | 39 (0.00)                                   | 32 (0.38) | 1.00 |
| 11-01 | Gp3 | g.chr17:20418790C>A  | RNA               | AC025627.9 |          | 31 (0.00)                                   | 35 (0.17) | 0.46 |
| 11-01 | Gp3 | g.chr17:37778528G>A  | lincRNA           | AC087491.2 |          | 28 (0.00)                                   | 31 (0.16) | 0.43 |
| 11-01 | Gp3 | g.chr17:20628258G>A  | RNA               | AC126365.1 |          | 30 (0.00)                                   | 19 (0.42) | 1.12 |
| 11-01 | Gp3 | g.chr12:73184273C>T  | RNA               | AC131213.1 |          | 79 (0.00)                                   | 33 (0.30) | 0.81 |
| 11-01 | Gp3 | g.chr3:38168065G>T   | Missense Mutation | ACAA1      | p.S251R  | acetyl-CoA acyltransferase 59 (0.00)        | 71 (0.15) | 0.41 |
| 11-01 | Gp3 | g.chr3:38168079C>T   | Missense Mutation | ACAA1      | p.G247S  | acetyl-CoA acyltransferase 68 (0.00)        | 66 (0.20) | 0.53 |
| 11-01 | Gp3 | g.chr17:35549152G>T  | Missense Mutation | ACACA      | p.P1395Q | acetyl-CoA carboxylase 71 (0.00)            | 33 (0.15) | 0.40 |
| 11-01 | Gp3 | g.chr17:35634885C>G  | Missense Mutation | ACACA      | p.M171I  | acetyl-CoA carboxylase 27 (0.00)            | 11 (0.55) | 1.45 |
| 11-01 | Gp3 | g.chr12:109577473G>C | Missense Mutation | ACACB      | p.R88P   | acetyl-CoA carboxylase 22 (0.00)            | 13 (0.38) | 1.03 |
| 11-01 | Gp3 | g.chr12:109625961C>G | Missense Mutation | ACACB      | p.A713G  | acetyl-CoA carboxylase 20 (0.00)            | 24 (0.25) | 0.67 |
| 11-01 | Gp3 | g.chr12:109685423C>T | Silent            | ACACB      | p.L1862L | acetyl-CoA carboxylase 28 (0.00)            | 23 (0.22) | 0.58 |
| 11-01 | Gp3 | g.chr12:112130610C>T | Nonsense Mutation | ACAD10     | p.R33*   | acyl-CoA dehydrogenase 52 (0.00)            | 42 (0.21) | 0.57 |
| 11-01 | Gp3 | g.chr3:128622975G>A  | Splice Site       | ACAD9      | p.Q343Q  | acyl-CoA dehydrogenase 42 (0.00)            | 18 (0.33) | 0.89 |
| 11-01 | Gp3 | g.chr11:108018112C>T | Silent            | ACAT1      | p.L427L  | acetyl-CoA acetyltransferase 108 (0.00)     | 81 (0.21) | 0.56 |
| 11-01 | Gp3 | g.chr1:226340079G>A  | Silent            | ACBD3      | p.S444S  | acyl-CoA binding domain 45 (0.00)           | 51 (0.29) | 0.78 |
| 11-01 | Gp3 | g.chr11:44098890C>A  | Silent            | ACCS       | p.G206G  | 1-aminocyclopropane-1-carboxylase 15 (0.00) | 24 (0.67) | 1.78 |
| 11-01 | Gp3 | g.chr7:100490940C>T  | Missense Mutation | ACHE       | p.R305Q  | acetylcholinesterase (Yt) 21 (0.00)         | 30 (0.40) | 1.07 |
| 11-01 | Gp3 | g.chr14:23550970G>T  | Missense Mutation | ACIN1      | p.S229Y  | apoptotic chromatin condensation 27 (0.00)  | 26 (0.38) | 1.03 |
| 11-01 | Gp3 | g.chr15:78485903C>T  | Missense Mutation | ACSBG1     | p.C203Y  | acyl-CoA synthetase bulb 53 (0.00)          | 34 (0.18) | 0.47 |
| 11-01 | Gp3 | g.chr5:131290040C>G  | Missense Mutation | ACSL6      | p.D661H  | acyl-CoA synthetase long 17 (0.00)          | 18 (0.33) | 0.89 |
| 11-01 | Gp3 | g.chr16:20563477C>G  | Missense Mutation | ACSM2B     | p.V295L  | acyl-CoA synthetase medium 68 (0.00)        | 31 (0.42) | 1.12 |
| 11-01 | Gp3 | g.chr12:81647289A>G  | Missense Mutation | ACSS3      | p.E612G  | acyl-CoA synthetase short 93 (0.00)         | 51 (0.18) | 0.47 |



|       |     |                      |                   |           |          |                                     |            |      |
|-------|-----|----------------------|-------------------|-----------|----------|-------------------------------------|------------|------|
| 11-01 | Gp3 | g.chr12:81647302G>A  | Silent            | ACSS3     | p.L616L  | acyl-CoA synthetase shc95 (0.00)    | 57 (0.28)  | 0.75 |
| 11-01 | Gp3 | g.chr1:229567370C>A  | Missense Mutation | ACTA1     | p.R337L  | actin, alpha 1, skeletal n42 (0.00) | 25 (0.20)  | 0.53 |
| 11-01 | Gp3 | g.chr9:111625115C>A  | Missense Mutation | ACTL7A    | p.D171E  | actin-like 7A 36 (0.00)             | 43 (0.28)  | 0.74 |
| 11-01 | Gp3 | g.chr2:158397621G>A  | Silent            | ACVR1C    | p.A402A  | activin A receptor, type 59 (0.00)  | 25 (0.20)  | 0.53 |
| 11-01 | Gp3 | g.chr12:52309079G>C  | Missense Mutation | ACVRL1    | p.E107D  | activin A receptor type 128 (0.00)  | 48 (0.19)  | 0.50 |
| 11-01 | Gp3 | g.chr15:43641242G>T  | Splice Site       | ADAL      | p.L257L  | adenosine deaminase-like 75 (0.00)  | 30 (0.17)  | 0.44 |
| 11-01 | Gp3 | g.chr15:58889803C>T  | Silent            | ADAM10    | p.Q730Q  | ADAM metallopeptidas 43 (0.00)      | 28 (0.57)  | 1.52 |
| 11-01 | Gp3 | g.chr2:207437900G>A  | Missense Mutation | ADAM23    | p.C573Y  | ADAM metallopeptidas 64 (0.00)      | 47 (0.19)  | 0.51 |
| 11-01 | Gp3 | g.chr4:175897208G>T  | Nonsense Mutation | ADAM29    | p.E178*  | ADAM metallopeptidas 40 (0.00)      | 33 (0.21)  | 0.57 |
| 11-01 | Gp3 | g.chr1:120437752C>T  | Missense Mutation | ADAM30    | p.G403E  | ADAM metallopeptidas 50 (0.00)      | 37 (0.24)  | 0.65 |
| 11-01 | Gp3 | g.chr21:28209987C>G  | Missense Mutation | ADAMTS1   | p.D939H  | ADAM metallopeptidas 36 (0.00)      | 42 (0.24)  | 0.63 |
| 11-01 | Gp3 | g.chr21:28212679C>A  | Silent            | ADAMTS1   | p.P527P  | ADAM metallopeptidas 71 (0.00)      | 33 (0.15)  | 0.40 |
| 11-01 | Gp3 | g.chr19:8651471C>A   | Nonsense Mutation | ADAMTS10  | p.G792*  | ADAM metallopeptidas 31 (0.00)      | 48 (0.19)  | 0.50 |
| 11-01 | Gp3 | g.chr5:33561165G>A   | Silent            | ADAMTS12  | p.P1364P | ADAM metallopeptidas 24 (0.00)      | 20 (0.25)  | 0.67 |
| 11-01 | Gp3 | g.chr5:33576274G>A   | Missense Mutation | ADAMTS12  | p.T1286I | ADAM metallopeptidas 108 (0.00)     | 34 (0.32)  | 0.86 |
| 11-01 | Gp3 | g.chr9:136305526C>A  | Silent            | ADAMTS13  | p.T616T  | ADAM metallopeptidas 45 (0.00)      | 31 (0.19)  | 0.52 |
| 11-01 | Gp3 | g.chr5:5182189C>T    | Silent            | ADAMTS16  | p.Y178Y  | ADAM metallopeptidas 122 (0.00)     | 60 (0.33)  | 0.89 |
| 11-01 | Gp3 | g.chr15:100871145T>A | Missense Mutation | ADAMTS17  | p.S189C  | ADAM metallopeptidas 51 (0.00)      | 18 (0.39)  | 1.04 |
| 11-01 | Gp3 | g.chr5:178541139G>T  | Missense Mutation | ADAMTS2   | p.T1122N | ADAM metallopeptidas 63 (0.00)      | 29 (0.38)  | 1.01 |
| 11-01 | Gp3 | g.chr12:43792951C>A  | Missense Mutation | ADAMTS20  | p.C1457F | ADAM metallopeptidas 131 (0.00)     | 112 (0.17) | 0.45 |
| 11-01 | Gp3 | g.chr12:43793021C>A  | Missense Mutation | ADAMTS20  | p.G1434C | ADAM metallopeptidas 50 (0.00)      | 25 (0.24)  | 0.64 |
| 11-01 | Gp3 | g.chr21:28327142C>G  | Missense Mutation | ADAMTS5   | p.G385R  | ADAM metallopeptidas 19 (0.00)      | 13 (0.62)  | 1.64 |
| 11-01 | Gp3 | g.chr3:64601011C>A   | Nonsense Mutation | ADAMTS9   | p.G1059* | ADAM metallopeptidas 117 (0.00)     | 69 (0.55)  | 1.47 |
| 11-01 | Gp3 | g.chr9:18906904G>T   | Nonsense Mutation | ADAMTSL1  | p.E1726* | ADAMTS-like 1 68 (0.00)             | 26 (0.58)  | 0.91 |
| 11-01 | Gp3 | g.chr15:84659967G>A  | Splice Site       | ADAMTSL3  |          | ADAMTS-like 3 61 (0.00)             | 42 (0.48)  | 1.27 |
| 11-01 | Gp3 | g.chr7:944753G>C     | Missense Mutation | ADAP1     | p.R149G  | ArfGAP with dual PH d26 (0.00)      | 41 (0.22)  | 0.59 |
| 11-01 | Gp3 | g.chr21:46596513G>A  | Silent            | ADARB1    | p.L299L  | adenosine deaminase, R41 (0.00)     | 28 (0.25)  | 0.67 |
| 11-01 | Gp3 | g.chr14:24788334G>A  | Missense Mutation | ADCY4     | p.H976Y  | adenylate cyclase 4 138 (0.00)      | 74 (0.18)  | 0.47 |
| 11-01 | Gp3 | g.chr16:4165059G>A   | Silent            | ADCY9     | p.L129L  | adenylate cyclase 9 21 (0.00)       | 32 (0.19)  | 0.50 |
| 11-01 | Gp3 | g.chr7:31132320C>T   | Silent            | ADCYAP1R1 | p.D339D  | adenylate cyclase activa 66 (0.00)  | 28 (0.25)  | 0.67 |
| 11-01 | Gp3 | g.chr6:147045434C>A  | Silent            | ADGB      | p.T736T  | androglobin 102 (0.00)              | 65 (0.29)  | 0.78 |
| 11-01 | Gp3 | g.chr6:147045438G>A  | Missense Mutation | ADGB      | p.A738T  | androglobin 102 (0.00)              | 65 (0.34)  | 0.90 |
| 11-01 | Gp3 | g.chr4:100232714G>A  | Silent            | ADH1B     | p.L310L  | alcohol dehydrogenase 179 (0.00)    | 123 (0.17) | 0.46 |
| 11-01 | Gp3 | g.chr8:67357642G>A   | Silent            | ADHFE1    | p.L181L  | alcohol dehydrogenase, 58 (0.00)    | 55 (0.20)  | 0.67 |
| 11-01 | Gp3 | g.chr20:49511043G>A  | Missense Mutation | ADNP      | p.R70W   | activity-dependent neur(30 (0.00)   | 20 (0.50)  | 1.33 |

|       |     |                      |                   |         |          |                           |            |            |      |
|-------|-----|----------------------|-------------------|---------|----------|---------------------------|------------|------------|------|
| 11-01 | Gp3 | g.chr15:73044897G>C  | Missense Mutation | ADPGK   | p.L426V  | ADP-dependent glucoki     | 143 (0.00) | 64 (0.16)  | 0.42 |
| 11-01 | Gp3 | g.chr13:114107713C>T | Missense Mutation | ADPRHL1 | p.G14S   | ADP-ribosylhydrolase li   | 67 (0.00)  | 110 (0.16) | 0.44 |
| 11-01 | Gp3 | g.chr8:26722006G>A   | Missense Mutation | ADRA1A  | p.P161S  | adrenoceptor alpha 1A     | 31 (0.00)  | 19 (0.32)  | 0.47 |
| 11-01 | Gp3 | g.chr22:26081173C>G  | Missense Mutation | ADRBK2  | p.H262D  | adrenergic, beta, receptc | 16 (0.00)  | 26 (0.27)  | 0.72 |
| 11-01 | Gp3 | g.chr22:26105884C>T  | Missense Mutation | ADRBK2  | p.H450Y  | adrenergic, beta, receptc | 84 (0.00)  | 38 (0.32)  | 0.84 |
| 11-01 | Gp3 | g.chr5:148691697C>A  | Missense Mutation | AFAP1L1 | p.P317Q  | actin filament associatec | 27 (0.00)  | 24 (0.21)  | 0.56 |
| 11-01 | Gp3 | g.chr4:74308145G>A   | Splice Site       | AFP     | p.K205K  | alpha-fetoprotein         | 60 (0.00)  | 48 (0.15)  | 0.39 |
| 11-01 | Gp3 | g.chr2:236792067G>A  | Missense Mutation | AGAP1   | p.V377M  | ArfGAP with GTPase d      | 99 (0.00)  | 80 (0.19)  | 0.50 |
| 11-01 | Gp3 | g.chr2:236817491G>T  | Missense Mutation | AGAP1   | p.S422I  | ArfGAP with GTPase d      | 36 (0.00)  | 25 (0.40)  | 1.07 |
| 11-01 | Gp3 | g.chr15:86814893C>A  | Silent            | AGBL1   | p.G631G  | ATP/GTP binding prote     | 32 (0.00)  | 24 (0.67)  | 1.78 |
| 11-01 | Gp3 | g.chr1:100336046G>T  | Missense Mutation | AGL     | p.R252I  | amylo-alpha-1, 6-glucos   | 79 (0.00)  | 65 (0.17)  | 0.45 |
| 11-01 | Gp3 | g.chr1:36437779G>T   | Missense Mutation | AGO3    | p.S156I  | argonaute RISC catalyti   | 41 (0.00)  | 30 (0.17)  | 0.44 |
| 11-01 | Gp3 | g.chr1:36439108C>T   | Silent            | AGO3    | p.I218I  | argonaute RISC catalyti   | 82 (0.01)  | 53 (0.17)  | 0.45 |
| 11-01 | Gp3 | g.chr1:36288544C>A   | Missense Mutation | AGO4    | p.N89K   | argonaute RISC catalyti   | 44 (0.00)  | 67 (0.34)  | 0.92 |
| 11-01 | Gp3 | g.chr2:178402887C>T  | Silent            | AGPS    | p.D647D  | alkylglycerone phosphat   | 133 (0.00) | 50 (0.16)  | 0.43 |
| 11-01 | Gp3 | g.chr1:247006031T>A  | Missense Mutation | AHCTF1  | p.K2226N | AT hook containing trar   | 34 (0.00)  | 22 (0.82)  | 1.72 |
| 11-01 | Gp3 | g.chr1:247070986G>A  | Silent            | AHCTF1  | p.L246L  | AT hook containing trar   | 76 (0.00)  | 63 (0.21)  | 0.43 |
| 11-01 | Gp3 | g.chr6:135639750C>G  | Silent            | AHI1    | p.L1111L | Abelson helper integrati  | 46 (0.00)  | 35 (0.14)  | 0.38 |
| 11-01 | Gp3 | g.chr11:62290902C>A  | Nonsense Mutation | AHNAK   | p.E3663* | AHNAK nucleoprotein       | 45 (0.00)  | 36 (0.58)  | 1.56 |
| 11-01 | Gp3 | g.chr11:62293939G>C  | Silent            | AHNAK   | p.G2650G | AHNAK nucleoprotein       | 27 (0.00)  | 22 (0.64)  | 1.70 |
| 11-01 | Gp3 | g.chr11:62294344C>T  | Missense Mutation | AHNAK   | p.M2515I | AHNAK nucleoprotein       | 60 (0.00)  | 62 (0.27)  | 0.73 |
| 11-01 | Gp3 | g.chr11:62295229G>T  | Silent            | AHNAK   | p.I2220I | AHNAK nucleoprotein       | 49 (0.00)  | 32 (0.25)  | 0.67 |
| 11-01 | Gp3 | g.chr11:62296129G>T  | Silent            | AHNAK   | p.P1920P | AHNAK nucleoprotein       | 79 (0.00)  | 30 (0.23)  | 0.62 |
| 11-01 | Gp3 | g.chr11:62297875C>T  | Silent            | AHNAK   | p.K1338K | AHNAK nucleoprotein       | 52 (0.00)  | 39 (0.41)  | 1.09 |
| 11-01 | Gp3 | g.chr14:105406005C>G | Missense Mutation | AHNAK2  | p.E259D  | AHNAK nucleoprotein       | 99 (0.00)  | 43 (0.19)  | 0.50 |
| 11-01 | Gp3 | g.chr16:31539826G>A  | Silent            | AHSP    | p.V41V   | alpha hemoglobin stabil   | 50 (0.00)  | 34 (0.18)  | 0.47 |
| 11-01 | Gp3 | g.chr6:143457981G>A  | Missense Mutation | AIG1    | p.A51T   | androgen-induced 1        | 102 (0.00) | 63 (0.14)  | 0.38 |
| 11-01 | Gp3 | g.chr6:107016364C>A  | Missense Mutation | AIM1    | p.Q1699K | absent in melanoma 1      | 69 (0.00)  | 65 (0.35)  | 0.55 |
| 11-01 | Gp3 | g.chr1:33480137G>T   | Missense Mutation | AK2     | p.P162T  | adenylate kinase 2        | 82 (0.00)  | 45 (0.18)  | 0.47 |
| 11-01 | Gp3 | g.chr6:109965836G>A  | Missense Mutation | AK9     | p.P272L  | adenylate kinase 9        | 73 (0.00)  | 23 (0.61)  | 0.94 |
| 11-01 | Gp3 | g.chr13:42875157G>T  | Nonsense Mutation | AKAP11  | p.E759*  | A kinase (PRKA) ancho     | 106 (0.00) | 45 (0.20)  | 0.53 |
| 11-01 | Gp3 | g.chr13:42877060C>A  | Nonsense Mutation | AKAP11  | p.S1393* | A kinase (PRKA) ancho     | 29 (0.00)  | 15 (0.33)  | 0.89 |
| 11-01 | Gp3 | g.chr6:151671437G>A  | Silent            | AKAP12  | p.K637K  | A kinase (PRKA) ancho     | 62 (0.00)  | 37 (0.16)  | 0.43 |
| 11-01 | Gp3 | g.chr6:151674176C>A  | Silent            | AKAP12  | p.V1550V | A kinase (PRKA) ancho     | 55 (0.00)  | 43 (0.33)  | 0.87 |
| 11-01 | Gp3 | g.chr14:33242896G>A  | Missense Mutation | AKAP6   | p.E1129K | A kinase (PRKA) ancho     | 61 (0.00)  | 66 (0.61)  | 1.62 |

|       |     |                      |                   |            |          |                           |            |            |      |
|-------|-----|----------------------|-------------------|------------|----------|---------------------------|------------|------------|------|
| 11-01 | Gp3 | g.chr14:33242955G>A  | Silent            | AKAP6      | p.L1148L | A kinase (PRKA) ancho     | 77 (0.00)  | 69 (0.51)  | 1.35 |
| 11-01 | Gp3 | g.chr14:33293299G>C  | Missense Mutation | AKAP6      | p.V2094L | A kinase (PRKA) ancho     | 56 (0.02)  | 40 (0.20)  | 0.53 |
| 11-01 | Gp3 | g.chr7:91630770G>A   | Silent            | AKAP9      | p.K513K  | A kinase (PRKA) ancho     | 75 (0.00)  | 24 (0.25)  | 0.67 |
| 11-01 | Gp3 | g.chr7:91631002G>A   | Missense Mutation | AKAP9      | p.A591T  | A kinase (PRKA) ancho     | 57 (0.00)  | 52 (0.17)  | 0.46 |
| 11-01 | Gp3 | g.chr7:91714132G>A   | Splice Site       | AKAP9      |          | A kinase (PRKA) ancho     | 89 (0.01)  | 56 (0.14)  | 0.38 |
| 11-01 | Gp3 | g.chr7:91724416C>T   | Missense Mutation | AKAP9      | p.L3220F | A kinase (PRKA) ancho     | 80 (0.00)  | 121 (0.19) | 0.51 |
| 11-01 | Gp3 | g.chr7:134134482T>C  | Missense Mutation | AKR1B1     | p.D140G  | aldo-keto reductase fam   | 88 (0.00)  | 22 (0.36)  | 0.97 |
| 11-01 | Gp3 | g.chr1:243736254C>G  | Missense Mutation | AKT3       | p.G265R  | v-akt murine thymoma      | 54 (0.00)  | 38 (0.24)  | 0.63 |
| 11-01 | Gp3 | g.chr10:82012803C>A  | Silent            | AL359195.1 | p.T107T  |                           | 53 (0.00)  | 19 (0.32)  | 0.84 |
| 11-01 | Gp3 | g.chr10:97402833G>A  | Silent            | ALDH18A1   | p.I73I   | aldehyde dehydrogenas     | 48 (0.02)  | 24 (0.25)  | 0.67 |
| 11-01 | Gp3 | g.chr9:75520921G>A   | Silent            | ALDH1A1    | p.A462A  | aldehyde dehydrogenas     | 26 (0.00)  | 26 (0.35)  | 1.13 |
| 11-01 | Gp3 | g.chr14:74538138T>C  | Missense Mutation | ALDH6A1    | p.T164A  | aldehyde dehydrogenas     | 35 (0.00)  | 31 (0.45)  | 1.20 |
| 11-01 | Gp3 | g.chr5:125912859C>T  | Missense Mutation | ALDH7A1    | p.V188I  | aldehyde dehydrogenas     | 22 (0.00)  | 21 (0.38)  | 1.02 |
| 11-01 | Gp3 | g.chr1:165638613C>A  | Missense Mutation | ALDH9A1    | p.Q335H  | aldehyde dehydrogenas     | 15 (0.00)  | 24 (0.46)  | 1.22 |
| 11-01 | Gp3 | g.chr1:95448682C>A   | Missense Mutation | ALG14      | p.A201S  | ALG14, UDP-N-acetylgl     | 111 (0.00) | 33 (0.15)  | 0.40 |
| 11-01 | Gp3 | g.chr3:183963328G>A  | Silent            | ALG3       | p.A84A   | ALG3, alpha-1,3- mann     | 65 (0.02)  | 28 (0.36)  | 0.95 |
| 11-01 | Gp3 | g.chr14:78140431C>T  | Silent            | ALKBH1     | p.G298G  | alkB, alkylolation repair | h21 (0.00) | 20 (0.30)  | 0.80 |
| 11-01 | Gp3 | g.chr11:43941526C>T  | Missense Mutation | ALKBH3     | p.T276I  | alkB, alkylolation repair | h81 (0.00) | 65 (0.29)  | 0.78 |
| 11-01 | Gp3 | g.chr7:102100144G>A  | Silent            | ALKBH4     | p.I76I   | alkB, alkylolation repair | h16 (0.00) | 20 (0.55)  | 1.47 |
| 11-01 | Gp3 | g.chr2:73677141C>T   | Missense Mutation | ALMS1      | p.H1162Y | Alstrom syndrome 1        | 152 (0.00) | 41 (0.37)  | 0.55 |
| 11-01 | Gp3 | g.chr4:113351967C>G  | Missense Mutation | ALPK1      | p.Q422E  | alpha-kinase 1            | 58 (0.00)  | 37 (0.22)  | 0.58 |
| 11-01 | Gp3 | g.chr18:56246073C>G  | Missense Mutation | ALPK2      | p.Q645H  | alpha-kinase 2            | 93 (0.00)  | 56 (0.55)  | 1.48 |
| 11-01 | Gp3 | g.chr12:85677437C>T  | Missense Mutation | ALX1       | p.S105F  | ALX homeobox 1            | 107 (0.00) | 63 (0.14)  | 0.38 |
| 11-01 | Gp3 | g.chrX:63413023G>T   | Silent            | AMER1      | p.G48G   | APC membrane recruitn     | 40 (0.00)  | 57 (0.39)  | 0.64 |
| 11-01 | Gp3 | g.chr11:118081424C>A | Nonsense Mutation | AMICA1     | p.E68*   | adhesion molecule, inte   | 65 (0.00)  | 41 (0.15)  | 0.39 |
| 11-01 | Gp3 | g.chr11:94592721C>T  | Missense Mutation | AMOTL1     | p.P659L  | angiominin like 1         | 55 (0.02)  | 15 (0.53)  | 1.42 |
| 11-01 | Gp3 | g.chr7:38457528G>A   | Missense Mutation | AMPH       | p.P432L  | amphiphysin               | 43 (0.00)  | 14 (0.50)  | 1.33 |
| 11-01 | Gp3 | g.chr4:145916696C>G  | Missense Mutation | ANAPC10    | p.K129N  | anaphase promoting con    | 48 (0.00)  | 42 (0.57)  | 1.52 |
| 11-01 | Gp3 | g.chr8:108334166C>G  | Missense Mutation | ANGPT1     | p.D56H   | angiopoietin 1            | 25 (0.00)  | 49 (0.20)  | 0.54 |
| 11-01 | Gp3 | g.chr4:114275778G>C  | Missense Mutation | ANK2       | p.D1969H | ankyrin 2, neuronal       | 31 (0.00)  | 19 (0.32)  | 0.84 |
| 11-01 | Gp3 | g.chr4:114276620C>A  | Silent            | ANK2       | p.T2249T | ankyrin 2, neuronal       | 53 (0.00)  | 21 (0.29)  | 0.76 |
| 11-01 | Gp3 | g.chr10:61830227C>A  | Missense Mutation | ANK3       | p.G3471V | ankyrin 3, node of Ranv   | 18 (0.00)  | 24 (0.33)  | 0.89 |
| 11-01 | Gp3 | g.chr10:61846574G>A  | Silent            | ANK3       | p.V1203V | ankyrin 3, node of Ranv   | 19 (0.00)  | 37 (0.22)  | 0.58 |
| 11-01 | Gp3 | g.chr17:54535258G>T  | Missense Mutation | ANKFN1     | p.R495M  | ankyrin-repeat and fibro  | 72 (0.00)  | 51 (0.20)  | 0.52 |
| 11-01 | Gp3 | g.chr17:4077203C>A   | Splice Site       | ANKFY1     |          | ankyrin repeat and FYV    | 37 (0.00)  | 16 (0.38)  | 1.00 |

|       |     |                      |                   |             |          |                                     |            |            |      |
|-------|-----|----------------------|-------------------|-------------|----------|-------------------------------------|------------|------------|------|
| 11-01 | Gp3 | g.chr17:4087205G>A   | Splice Site       | ANKFY1      | p.A567V  | ankyrin repeat and FYV 44 (0.00)    | 32 (0.47)  | 1.25       |      |
| 11-01 | Gp3 | g.chr5:14758622C>T   | Silent            | ANKH        | p.L133L  | ANKH inorganic pyropl22 (0.00)      | 45 (0.16)  | 0.41       |      |
| 11-01 | Gp3 | g.chr5:139819747G>A  | Missense Mutation | ANKHD1      | p.V221I  | ankyrin repeat and KH c37 (0.00)    | 43 (0.21)  | 0.56       |      |
| 11-01 | Gp3 | g.chr7:91957144G>A   | Missense Mutation | ANKIB1      | p.M239I  | ankyrin repeat and IBR 83 (0.01)    | 22 (0.41)  | 1.09       |      |
| 11-01 | Gp3 | g.chr2:241420505G>A  | Silent            | ANKMY1      | p.F778F  | ankyrin repeat and MYT43 (0.00)     | 54 (0.15)  | 0.40       |      |
| 11-01 | Gp3 | g.chr13:111532342C>A | Missense Mutation | ANKRD10     | p.C302F  | ankyrin repeat domain 133 (0.00)    | 20 (0.30)  | 0.80       |      |
| 11-01 | Gp3 | g.chr4:73944582C>T   | Silent            | ANKRD17     | p.S2395S | ankyrin repeat domain 138 (0.00)    | 19 (0.26)  | 0.70       |      |
| 11-01 | Gp3 | g.chr4:73957712G>A   | Missense Mutation | ANKRD17     | p.P1878L | ankyrin repeat domain 1134 (0.00)   | 82 (0.20)  | 0.52       |      |
| 11-01 | Gp3 | g.chr9:33548461G>A   | Missense Mutation | ANKRD18B    | p.G497S  | ankyrin repeat domain 1191 (0.00)   | 90 (0.31)  | 0.83       |      |
| 11-01 | Gp3 | g.chr9:95649967C>A   | RNA               | ANKRD19P    |          | ankyrin repeat domain 179 (0.00)    | 27 (0.33)  | 0.89       |      |
| 11-01 | Gp3 | g.chr2:95522916G>A   | RNA               | ANKRD20A8P  |          | ankyrin repeat domain 219 (0.00)    | 16 (0.38)  | 1.00       |      |
| 11-01 | Gp3 | g.chr10:27366395C>A  | Nonsense Mutation | ANKRD26     | p.E317*  | ankyrin repeat domain 253 (0.00)    | 29 (0.17)  | 0.46       |      |
| 11-01 | Gp3 | g.chr3:15762574C>T   | Missense Mutation | ANKRD28     | p.D252N  | ankyrin repeat domain 276 (0.00)    | 20 (0.35)  | 0.93       |      |
| 11-01 | Gp3 | g.chr10:37422914G>A  | Missense Mutation | ANKRD30A    | p.D174N  | ankyrin repeat domain 362 (0.02)    | 41 (0.61)  | 1.63       |      |
| 11-01 | Gp3 | g.chr10:37430847G>T  | Missense Mutation | ANKRD30A    | p.C285F  | ankyrin repeat domain 337 (0.00)    | 27 (0.56)  | 1.48       |      |
| 11-01 | Gp3 | g.chr10:37505182C>T  | Silent            | ANKRD30A    | p.H925H  | ankyrin repeat domain 352 (0.00)    | 31 (0.23)  | 0.60       |      |
| 11-01 | Gp3 | g.chr18:14752910G>A  | Missense Mutation | ANKRD30B    | p.V137M  | ankyrin repeat domain 385 (0.01)    | 65 (0.32)  | 0.86       |      |
| 11-01 | Gp3 | g.chr2:96652614G>T   | Missense Mutation | ANKRD36C    | p.P124Q  | ankyrin repeat domain 3176 (0.01)   | 111 (0.19) | 0.50       |      |
| 11-01 | Gp3 | g.chr7:6075998A>T    | Missense Mutation | ANKRD61     | p.D413V  | ankyrin repeat domain 636 (0.00)    | 38 (0.18)  | 0.49       |      |
| 11-01 | Gp3 | g.chr7:36435884G>A   | Missense Mutation | ANLN        | p.E10K   | anillin, actin binding prc46 (0.00) | 34 (0.18)  | 0.47       |      |
| 11-01 | Gp3 | g.chr7:36492185C>T   | Silent            | ANLN        | p.C1117C | anillin, actin binding prc82 (0.00) | 28 (0.25)  | 0.67       |      |
| 11-01 | Gp3 | g.chr12:101381422C>T | Silent            | ANO4        | p.A201A  | anoctamin 4                         | 99 (0.00)  | 112 (0.13) | 0.46 |
| 11-01 | Gp3 | g.chr12:101491636G>C | Missense Mutation | ANO4        | p.S605T  | anoctamin 4                         | 61 (0.00)  | 47 (0.17)  | 0.45 |
| 11-01 | Gp3 | g.chr2:242138766C>A  | Nonsense Mutation | ANO7        | p.Y169*  | anoctamin 7                         | 33 (0.00)  | 25 (0.28)  | 0.75 |
| 11-01 | Gp3 | g.chr19:17442144C>A  | Missense Mutation | ANO8        | p.M221I  | anoctamin 8                         | 28 (0.00)  | 31 (0.19)  | 0.52 |
| 11-01 | Gp3 | g.chr17:41001368G>A  | Silent            | AOC2        | p.E618E  | amine oxidase, copper c42 (0.00)    | 37 (0.57)  | 1.51       |      |
| 11-01 | Gp3 | g.chr21:33954568C>G  | Missense Mutation | AP000275.65 | p.W275S  |                                     | 48 (0.00)  | 25 (0.20)  | 0.53 |
| 11-01 | Gp3 | g.chr22:23825318G>A  | lincRNA           | AP000345.1  |          |                                     | 119 (0.00) | 65 (0.46)  | 1.23 |
| 11-01 | Gp3 | g.chr11:71117522C>T  | RNA               | AP002387.1  |          |                                     | 40 (0.00)  | 22 (0.32)  | 0.85 |
| 11-01 | Gp3 | g.chr18:15325744G>A  | RNA               | AP005901.1  |          |                                     | 73 (0.00)  | 24 (0.25)  | 0.67 |
| 11-01 | Gp3 | g.chr22:29735047G>T  | Missense Mutation | AP1B1       | p.L692M  | adaptor-related protein c87 (0.00)  | 44 (0.30)  | 0.47       |      |
| 11-01 | Gp3 | g.chr16:71768576C>G  | Missense Mutation | AP1G1       | p.S768T  | adaptor-related protein c77 (0.00)  | 22 (0.45)  | 1.21       |      |
| 11-01 | Gp3 | g.chr11:1006572C>A   | Missense Mutation | AP2A2       | p.L751I  | adaptor-related protein c26 (0.00)  | 56 (0.20)  | 0.52       |      |
| 11-01 | Gp3 | g.chr11:970298C>T    | Missense Mutation | AP2A2       | p.T89M   | adaptor-related protein c64 (0.00)  | 48 (0.17)  | 0.44       |      |
| 11-01 | Gp3 | g.chr5:77334982C>T   | Silent            | AP3B1       | p.K849K  | adaptor-related protein c59 (0.00)  | 32 (0.25)  | 0.67       |      |

|       |     |                      |                   |          |          |                                    |            |      |
|-------|-----|----------------------|-------------------|----------|----------|------------------------------------|------------|------|
| 11-01 | Gp3 | g.chr15:83345228C>T  | Silent            | AP3B2    | p.L518L  | adaptor-related protein c93 (0.00) | 40 (0.17)  | 0.47 |
| 11-01 | Gp3 | g.chr14:31535496G>A  | Missense Mutation | AP4S1    | p.E32K   | adaptor-related protein c93 (0.00) | 89 (0.16)  | 0.42 |
| 11-01 | Gp3 | g.chr12:99056471C>G  | Missense Mutation | APAF1    | p.P281R  | apoptotic peptidase activ50 (0.00) | 28 (0.18)  | 0.61 |
| 11-01 | Gp3 | g.chr9:72071282G>A   | Silent            | APBA1    | p.L557L  | amyloid beta (A4) precu156 (0.01)  | 82 (0.15)  | 0.39 |
| 11-01 | Gp3 | g.chr18:10471917C>A  | Silent            | APCDD1   | p.L211L  | adenomatosis polyposis 74 (0.00)   | 101 (0.18) | 0.48 |
| 11-01 | Gp3 | g.chr11:43345013C>T  | Silent            | API5     | p.L193L  | apoptosis inhibitor 5 58 (0.00)    | 37 (0.19)  | 0.50 |
| 11-01 | Gp3 | g.chr11:43363986G>A  | Missense Mutation | API5     | p.R499K  | apoptosis inhibitor 5 75 (0.00)    | 28 (0.21)  | 0.57 |
| 11-01 | Gp3 | g.chr2:68729963C>T   | Missense Mutation | APLF     | p.S90F   | aprataxin and PNKP lik64 (0.00)    | 63 (0.19)  | 0.51 |
| 11-01 | Gp3 | g.chr19:36369506G>A  | Missense Mutation | APLP1    | p.A534T  | amyloid beta (A4) precu64 (0.00)   | 41 (0.32)  | 0.85 |
| 11-01 | Gp3 | g.chr20:24944611G>A  | Silent            | APMAP    | p.L363L  | adipocyte plasma memb40 (0.00)     | 28 (0.57)  | 1.52 |
| 11-01 | Gp3 | g.chr2:21231247G>T   | Silent            | APOB     | p.S2831S | apolipoprotein B 56 (0.00)         | 29 (0.31)  | 0.83 |
| 11-01 | Gp3 | g.chr2:21252572G>A   | Missense Mutation | APOB     | p.P519L  | apolipoprotein B 48 (0.00)         | 54 (0.35)  | 0.94 |
| 11-01 | Gp3 | g.chr2:21260832G>A   | Silent            | APOB     | p.L179L  | apolipoprotein B 64 (0.00)         | 32 (0.28)  | 0.75 |
| 11-01 | Gp3 | g.chr22:36661852C>G  | Missense Mutation | APOL1    | p.P324A  | apolipoprotein L, 1 58 (0.00)      | 46 (0.15)  | 0.41 |
| 11-01 | Gp3 | g.chr5:115339048C>A  | Missense Mutation | AQPEP    | p.L670I  | 23 (0.00)                          | 14 (0.36)  | 0.95 |
| 11-01 | Gp3 | g.chr15:35210465C>A  | Nonsense Mutation | AQR      | p.G446*  | aquarius intron-binding 15 (0.00)  | 19 (0.37)  | 0.98 |
| 11-01 | Gp3 | g.chr11:72412808T>A  | Missense Mutation | ARAP1    | p.M730L  | ArfGAP with RhoGAP 30 (0.00)       | 23 (0.26)  | 0.70 |
| 11-01 | Gp3 | g.chr14:75136830C>T  | Splice Site       | AREL1    |          | apoptosis resistant E3 ul42 (0.00) | 39 (0.28)  | 0.75 |
| 11-01 | Gp3 | g.chr20:61907886G>A  | Missense Mutation | ARFGAP1  | p.M75I   | ADP-ribosylation factor 30 (0.00)  | 25 (0.32)  | 0.85 |
| 11-01 | Gp3 | g.chr10:32150363C>A  | Missense Mutation | ARHGAP12 | p.S303I  | Rho GTPase activating j34 (0.00)   | 34 (0.38)  | 1.02 |
| 11-01 | Gp3 | g.chr2:144525682C>A  | Missense Mutation | ARHGAP15 | p.Q457K  | Rho GTPase activating j91 (0.00)   | 21 (0.24)  | 0.63 |
| 11-01 | Gp3 | g.chr16:24964266G>A  | Missense Mutation | ARHGAP17 | p.P317L  | Rho GTPase activating j54 (0.00)   | 73 (0.37)  | 0.99 |
| 11-01 | Gp3 | g.chr10:99019270C>A  | Silent            | ARHGAP19 | p.L243L  | Rho GTPase activating j27 (0.00)   | 15 (0.47)  | 1.24 |
| 11-01 | Gp3 | g.chr10:24873973G>A  | Missense Mutation | ARHGAP21 | p.P1749S | Rho GTPase activating j32 (0.00)   | 24 (0.29)  | 0.78 |
| 11-01 | Gp3 | g.chr10:24874007C>G  | Missense Mutation | ARHGAP21 | p.M1737I | Rho GTPase activating j49 (0.00)   | 41 (0.24)  | 0.65 |
| 11-01 | Gp3 | g.chr10:24886925G>C  | Missense Mutation | ARHGAP21 | p.T1049S | Rho GTPase activating j40 (0.00)   | 26 (0.19)  | 0.51 |
| 11-01 | Gp3 | g.chr10:24908879G>T  | Missense Mutation | ARHGAP21 | p.Q649K  | Rho GTPase activating j58 (0.00)   | 35 (0.20)  | 0.53 |
| 11-01 | Gp3 | g.chr10:49654506C>G  | Missense Mutation | ARHGAP22 | p.R681S  | Rho GTPase activating j88 (0.00)   | 80 (0.16)  | 0.43 |
| 11-01 | Gp3 | g.chr10:49667812C>T  | Missense Mutation | ARHGAP22 | p.G198R  | Rho GTPase activating j50 (0.00)   | 41 (0.39)  | 1.04 |
| 11-01 | Gp3 | g.chr2:69049732G>A   | Missense Mutation | ARHGAP25 | p.M447I  | Rho GTPase activating j16 (0.00)   | 21 (0.24)  | 0.63 |
| 11-01 | Gp3 | g.chr11:128855912G>A | Silent            | ARHGAP32 | p.P141P  | Rho GTPase activating j20 (0.00)   | 24 (0.33)  | 0.89 |
| 11-01 | Gp3 | g.chr19:47424258G>C  | Missense Mutation | ARHGAP35 | p.D776H  | Rho GTPase activating j104 (0.00)  | 52 (0.52)  | 1.38 |
| 11-01 | Gp3 | g.chr12:15097764C>A  | Missense Mutation | ARHGDI B | p.D118Y  | Rho GDP dissociation ir48 (0.00)   | 46 (0.17)  | 0.46 |
| 11-01 | Gp3 | g.chr8:1905221C>T    | Missense Mutation | ARHGEF10 | p.S1276L | Rho guanine nucleotide 27 (0.00)   | 20 (0.50)  | 0.75 |
| 11-01 | Gp3 | g.chr1:156906608C>A  | Splice Site       | ARHGEF11 | p.G1544C | Rho guanine nucleotide 37 (0.00)   | 27 (0.33)  | 0.89 |

|       |     |                      |                   |          |          |                                      |           |      |
|-------|-----|----------------------|-------------------|----------|----------|--------------------------------------|-----------|------|
| 11-01 | Gp3 | g.chr11:120348002C>T | Missense Mutation | ARHGEF12 | p.S1147L | Rho guanine nucleotide 37 (0.00)     | 23 (0.22) | 0.58 |
| 11-01 | Gp3 | g.chr3:153870716C>A  | Missense Mutation | ARHGEF26 | p.S494R  | Rho guanine nucleotide 65 (0.00)     | 45 (0.33) | 0.89 |
| 11-01 | Gp3 | g.chr3:56779401G>A   | Silent            | ARHGEF3  | p.V205V  | Rho guanine nucleotide 77 (0.01)     | 64 (0.62) | 1.67 |
| 11-01 | Gp3 | g.chr3:56785099G>A   | Silent            | ARHGEF3  | p.P170P  | Rho guanine nucleotide 86 (0.00)     | 33 (0.15) | 0.40 |
| 11-01 | Gp3 | g.chr2:39193149G>A   | Silent            | ARHGEF33 | p.E782E  | Rho guanine nucleotide 31 (0.00)     | 19 (0.42) | 1.12 |
| 11-01 | Gp3 | g.chr13:111938533C>A | Missense Mutation | ARHGEF7  | p.P507T  | Rho guanine nucleotide 89 (0.01)     | 39 (0.21) | 0.55 |
| 11-01 | Gp3 | g.chr1:27087965G>C   | Splice Site       | ARID1A   |          | AT rich interactive dom 82 (0.00)    | 48 (0.15) | 0.39 |
| 11-01 | Gp3 | g.chr1:27107137G>A   | Missense Mutation | ARID1A   | p.E2033K | AT rich interactive dom 48 (0.00)    | 23 (0.22) | 0.58 |
| 11-01 | Gp3 | g.chr6:157405822C>T  | Silent            | ARID1B   | p.L688L  | AT rich interactive dom 44 (0.00)    | 19 (0.42) | 1.12 |
| 11-01 | Gp3 | g.chr14:58838653G>A  | Missense Mutation | ARID4A   | p.M1240I | AT rich interactive dom 32 (0.00)    | 25 (0.20) | 0.53 |
| 11-01 | Gp3 | g.chr10:63810695G>A  | Missense Mutation | ARID5B   | p.R261K  | AT rich interactive dom 102 (0.00)   | 56 (0.30) | 0.81 |
| 11-01 | Gp3 | g.chr10:63845477G>A  | Missense Mutation | ARID5B   | p.E406K  | AT rich interactive dom 53 (0.00)    | 35 (0.43) | 1.14 |
| 11-01 | Gp3 | g.chr2:232079553G>T  | Missense Mutation | ARMC9    | p.V63F   | armadillo repeat contain 64 (0.00)   | 25 (0.28) | 0.75 |
| 11-01 | Gp3 | g.chr15:80743288G>T  | Silent            | ARNT2    | p.V33V   | aryl-hydrocarbon recept 63 (0.00)    | 30 (0.30) | 0.80 |
| 11-01 | Gp3 | g.chr11:13378628G>T  | Missense Mutation | ARNTL    | p.R69M   | aryl hydrocarbon recept 55 (0.00)    | 35 (0.20) | 0.53 |
| 11-01 | Gp3 | g.chr15:52844162G>A  | Missense Mutation | ARPP19   | p.P103L  | cAMP-regulated phosph 82 (0.00)      | 42 (0.26) | 0.70 |
| 11-01 | Gp3 | g.chr19:4896863G>A   | Silent            | ARRDC5   | p.H107H  | arrestin domain containi 116 (0.00)  | 95 (0.15) | 0.39 |
| 11-01 | Gp3 | g.chrX:2924658C>G    | Missense Mutation | ARSH     | p.T2R    | arylsulfatase family, me 20 (0.00)   | 20 (0.70) | 1.17 |
| 11-01 | Gp3 | g.chr5:149676924C>T  | Silent            | ARSI     | p.G521G  | arylsulfatase family, me 49 (0.00)   | 46 (0.33) | 0.87 |
| 11-01 | Gp3 | g.chr10:52005053G>A  | Nonsense Mutation | ASAH2    | p.Q97*   | N-acylsphingosine amid 105 (0.00)    | 28 (0.39) | 1.05 |
| 11-01 | Gp3 | g.chr3:57312405C>A   | Splice Site       | ASB14    | p.K477N  | ankyrin repeat and SOC 21 (0.00)     | 11 (0.64) | 1.70 |
| 11-01 | Gp3 | g.chrX:15270506G>A   | Silent            | ASB9     | p.D101D  | ankyrin repeat and SOC 26 (0.00)     | 20 (0.60) | 1.00 |
| 11-01 | Gp3 | g.chr1:155408159C>A  | Missense Mutation | ASH1L    | p.Q1929H | ash1 (absent, small, or h 47 (0.00)  | 24 (0.25) | 0.67 |
| 11-01 | Gp3 | g.chr1:155448884G>T  | Nonsense Mutation | ASH1L    | p.Y1259* | ash1 (absent, small, or h 109 (0.00) | 76 (0.17) | 0.46 |
| 11-01 | Gp3 | g.chr7:65546919G>A   | Missense Mutation | ASL      | p.G48S   | argininosuccinate lyase 21 (0.00)    | 19 (0.26) | 0.70 |
| 11-01 | Gp3 | g.chr2:70187951C>G   | Missense Mutation | ASPRV1   | p.Q290H  | aspartic peptidase, retro 70 (0.00)  | 18 (0.28) | 0.42 |
| 11-01 | Gp3 | g.chr1:176934366G>C  | Missense Mutation | ASTN1    | p.P511A  | astrotactin 1 55 (0.00)              | 21 (0.48) | 1.27 |
| 11-01 | Gp3 | g.chr9:119567953G>A  | Missense Mutation | ASTN2    | p.T734I  | astrotactin 2 45 (0.00)              | 25 (0.36) | 0.96 |
| 11-01 | Gp3 | g.chr9:119738421C>A  | Missense Mutation | ASTN2    | p.G524W  | astrotactin 2 31 (0.00)              | 40 (0.30) | 0.80 |
| 11-01 | Gp3 | g.chr20:31019194C>A  | Missense Mutation | ASXL1    | p.N263K  | additional sex combs lik 87 (0.00)   | 52 (0.50) | 1.33 |
| 11-01 | Gp3 | g.chr2:25965296G>A   | Nonsense Mutation | ASXL2    | p.Q1304* | additional sex combs lik 34 (0.00)   | 49 (0.14) | 0.38 |
| 11-01 | Gp3 | g.chr2:25965396C>A   | Missense Mutation | ASXL2    | p.Q1270H | additional sex combs lik 98 (0.00)   | 79 (0.22) | 0.57 |
| 11-01 | Gp3 | g.chr2:25967087C>A   | Missense Mutation | ASXL2    | p.G707W  | additional sex combs lik 38 (0.00)   | 27 (0.74) | 1.98 |
| 11-01 | Gp3 | g.chr2:25967114C>G   | Missense Mutation | ASXL2    | p.G698R  | additional sex combs lik 41 (0.00)   | 25 (0.72) | 1.92 |
| 11-01 | Gp3 | g.chr8:124384876C>A  | Splice Site       | ATAD2    |          | ATPase family, AAA do 46 (0.00)      | 28 (0.29) | 0.76 |

|       |     |                      |                   |          |          |                             |            |            |      |
|-------|-----|----------------------|-------------------|----------|----------|-----------------------------|------------|------------|------|
| 11-01 | Gp3 | g.chr5:81354358G>A   | Silent            | ATG10    | p.K51K   | autophagy related 10        | 42 (0.00)  | 30 (0.20)  | 0.53 |
| 11-01 | Gp3 | g.chr11:64662515C>T  | Missense Mutation | ATG2A    | p.R1916H | autophagy related 2A        | 15 (0.00)  | 30 (0.27)  | 0.71 |
| 11-01 | Gp3 | g.chr2:242608085C>T  | Silent            | ATG4B    | p.D314D  | autophagy related 4B, cy32  | 32 (0.00)  | 42 (0.14)  | 0.38 |
| 11-01 | Gp3 | g.chr11:108151732C>T | Missense Mutation | ATM      | p.A1138V | ATM serine/threonine k 37   | 37 (0.00)  | 26 (0.23)  | 0.62 |
| 11-01 | Gp3 | g.chr11:108158382C>T | Missense Mutation | ATM      | p.T1350M | ATM serine/threonine k 95   | 95 (0.00)  | 59 (0.29)  | 0.77 |
| 11-01 | Gp3 | g.chr11:108214071T>C | Silent            | ATM      | p.S2797S | ATM serine/threonine k 49   | 49 (0.00)  | 31 (0.16)  | 0.43 |
| 11-01 | Gp3 | g.chr15:25925043G>C  | Silent            | ATP10A   | p.P1315P | ATPase, class V, type 1027  | 27 (0.00)  | 21 (0.24)  | 0.63 |
| 11-01 | Gp3 | g.chr15:25936921C>T  | Missense Mutation | ATP10A   | p.V1036I | ATPase, class V, type 1033  | 33 (0.00)  | 25 (0.64)  | 1.71 |
| 11-01 | Gp3 | g.chr4:47593348G>A   | Missense Mutation | ATP10D   | p.E1411K | ATPase, class V, type 1099  | 99 (0.01)  | 57 (0.28)  | 0.75 |
| 11-01 | Gp3 | g.chr13:113487180G>A | Missense Mutation | ATP11A   | p.E468K  | ATPase, class VI, type 1111 | 111 (0.00) | 52 (0.19)  | 0.51 |
| 11-01 | Gp3 | g.chr13:113514675C>A | Silent            | ATP11A   | p.L934L  | ATPase, class VI, type 143  | 143 (0.00) | 27 (0.30)  | 0.79 |
| 11-01 | Gp3 | g.chr13:113514688G>A | Missense Mutation | ATP11A   | p.V939I  | ATPase, class VI, type 143  | 143 (0.00) | 28 (0.32)  | 0.86 |
| 11-01 | Gp3 | g.chrX:138856974G>C  | Silent            | ATP11C   | p.L700L  | ATPase, class VI, type 160  | 160 (0.00) | 35 (0.37)  | 0.62 |
| 11-01 | Gp3 | g.chr13:25264560G>A  | Missense Mutation | ATP12A   | p.G211R  | ATPase, H+/K+ transpo 64    | 64 (0.00)  | 33 (0.15)  | 0.40 |
| 11-01 | Gp3 | g.chr13:25266575G>C  | Silent            | ATP12A   | p.L359L  | ATPase, H+/K+ transpo 55    | 55 (0.00)  | 41 (0.27)  | 0.72 |
| 11-01 | Gp3 | g.chr3:192992921G>A  | Silent            | ATP13A5  | p.N1189N | ATPase type 13A5            | 37 (0.00)  | 16 (0.31)  | 0.83 |
| 11-01 | Gp3 | g.chr3:193068980G>T  | Missense Mutation | ATP13A5  | p.P206Q  | ATPase type 13A5            | 17 (0.00)  | 11 (0.64)  | 1.70 |
| 11-01 | Gp3 | g.chr1:116941664G>T  | Silent            | ATP1A1   | p.L802L  | ATPase, Na+/K+ transp 84    | 84 (0.00)  | 58 (0.24)  | 0.64 |
| 11-01 | Gp3 | g.chr1:169100690C>T  | Missense Mutation | ATP1B1   | p.T270I  | ATPase, Na+/K+ transp 71    | 71 (0.01)  | 34 (0.32)  | 0.86 |
| 11-01 | Gp3 | g.chr16:28898805C>A  | Silent            | ATP2A1   | p.T230T  | ATPase, Ca++ transport 31   | 31 (0.00)  | 15 (0.47)  | 1.24 |
| 11-01 | Gp3 | g.chr12:90049629C>T  | Missense Mutation | ATP2B1   | p.S12N   | ATPase, Ca++ transport 45   | 45 (0.00)  | 35 (0.17)  | 0.46 |
| 11-01 | Gp3 | g.chr1:203669339C>T  | Silent            | ATP2B4   | p.L219L  | ATPase, Ca++ transport 78   | 78 (0.00)  | 82 (0.20)  | 0.52 |
| 11-01 | Gp3 | g.chr16:84482178G>A  | Missense Mutation | ATP2C2   | p.E515K  | ATPase, Ca++ transport 38   | 38 (0.00)  | 23 (0.30)  | 0.64 |
| 11-01 | Gp3 | g.chr16:84494322C>G  | Missense Mutation | ATP2C2   | p.T828S  | ATPase, Ca++ transport 75   | 75 (0.00)  | 39 (0.18)  | 0.38 |
| 11-01 | Gp3 | g.chr17:40639346C>G  | Silent            | ATP6V0A1 | p.T335T  | ATPase, H+ transportin; 21  | 21 (0.00)  | 20 (0.40)  | 1.07 |
| 11-01 | Gp3 | g.chr12:124209209G>A | Silent            | ATP6V0A2 | p.L101L  | ATPase, H+ transportin; 174 | 174 (0.00) | 173 (0.19) | 0.51 |
| 11-01 | Gp3 | g.chr7:138424325C>T  | Missense Mutation | ATP6V0A4 | p.G511E  | ATPase, H+ transportin; 27  | 27 (0.00)  | 22 (0.23)  | 0.61 |
| 11-01 | Gp3 | g.chr8:20075734C>A   | Nonsense Mutation | ATP6V1B2 | p.S446*  | ATPase, H+ transportin; 80  | 80 (0.00)  | 29 (0.55)  | 0.82 |
| 11-01 | Gp3 | g.chr2:46739318G>A   | Missense Mutation | ATP6V1E2 | p.A178V  | ATPase, H+ transportin; 118 | 118 (0.00) | 99 (0.22)  | 0.59 |
| 11-01 | Gp3 | g.chrX:77227181G>T   | Nonsense Mutation | ATP7A    | p.E15*   | ATPase, Cu++ transport 34   | 34 (0.00)  | 29 (0.48)  | 0.80 |
| 11-01 | Gp3 | g.chrX:77268522C>A   | Silent            | ATP7A    | p.A773A  | ATPase, Cu++ transport 39   | 39 (0.00)  | 31 (0.29)  | 0.48 |
| 11-01 | Gp3 | g.chr18:55322617C>A  | Nonsense Mutation | ATP8B1   | p.E914*  | ATPase, aminophospho; 74    | 74 (0.00)  | 67 (0.18)  | 0.48 |
| 11-01 | Gp3 | g.chr18:55351296G>C  | Missense Mutation | ATP8B1   | p.C534W  | ATPase, aminophospho; 99    | 99 (0.00)  | 85 (0.15)  | 0.41 |
| 11-01 | Gp3 | g.chr18:55364917C>A  | Missense Mutation | ATP8B1   | p.D211Y  | ATPase, aminophospho; 22    | 22 (0.00)  | 18 (0.28)  | 0.74 |
| 11-01 | Gp3 | g.chr1:154304134G>A  | Missense Mutation | ATP8B2   | p.E173K  | ATPase, aminophospho; 66    | 66 (0.00)  | 75 (0.17)  | 0.46 |

|       |     |                      |                   |          |          |                                                       |           |           |      |
|-------|-----|----------------------|-------------------|----------|----------|-------------------------------------------------------|-----------|-----------|------|
| 11-01 | Gp3 | g.chr20:50292744G>A  | Missense Mutation | ATP9A    | p.T268I  | ATPase, class II, type 9.27 (0.00)                    | 25 (0.28) | 0.75      |      |
| 11-01 | Gp3 | g.chr3:142281400C>G  | Missense Mutation | ATR      | p.E282Q  | ATR serine/threonine kinase 60 (0.00)                 | 42 (0.24) | 0.63      |      |
| 11-01 | Gp3 | g.chr3:48491495G>C   | Silent            | ATRIP    | p.G100G  | ATR interacting protein 107 (0.00)                    | 39 (0.46) | 1.23      |      |
| 11-01 | Gp3 | g.chr20:3556524G>A   | Missense Mutation | ATRN     | p.A715T  | attractin                                             | 56 (0.00) | 22 (0.27) | 0.73 |
| 11-01 | Gp3 | g.chr20:3575147C>T   | Missense Mutation | ATRN     | p.A1115V | attractin                                             | 68 (0.00) | 28 (0.18) | 0.48 |
| 11-01 | Gp3 | g.chr12:111948269G>A | Missense Mutation | ATXN2    | p.A454V  | ataxin 2                                              | 83 (0.00) | 35 (0.23) | 0.61 |
| 11-01 | Gp3 | g.chr14:92549520C>T  | Missense Mutation | ATXN3    | p.M186I  | ataxin 3                                              | 59 (0.00) | 37 (0.38) | 1.01 |
| 11-01 | Gp3 | g.chr3:63982114C>A   | Silent            | ATXN7    | p.T872T  | ataxin 7                                              | 34 (0.00) | 33 (0.15) | 0.40 |
| 11-01 | Gp3 | g.chr1:110033616C>T  | Silent            | ATXN7L2  | p.S477S  | ataxin 7-like 2                                       | 57 (0.00) | 59 (0.20) | 0.54 |
| 11-01 | Gp3 | g.chr17:42271728C>T  | Missense Mutation | ATXN7L3  | p.S323N  | ataxin 7-like 3                                       | 39 (0.00) | 26 (0.23) | 0.62 |
| 11-01 | Gp3 | g.chr17:42273448C>A  | Missense Mutation | ATXN7L3  | p.Q166H  | ataxin 7-like 3                                       | 28 (0.00) | 28 (0.21) | 0.57 |
| 11-01 | Gp3 | g.chr9:93983144C>T   | Silent            | AUH      | p.Q262Q  | AU RNA binding protein 40 (0.00)                      | 11 (0.64) | 1.70      |      |
| 11-01 | Gp3 | g.chr1:26162102C>A   | Missense Mutation | AUNIP    | p.E152D  | aurora kinase A and nuclear 34 (0.03)                 | 29 (0.21) | 0.55      |      |
| 11-01 | Gp3 | g.chr19:57743588C>A  | Missense Mutation | AURKC    | p.L98I   | aurora kinase C                                       | 37 (0.00) | 18 (0.28) | 0.74 |
| 11-01 | Gp3 | g.chr19:57743589T>C  | Missense Mutation | AURKC    | p.L98P   | aurora kinase C                                       | 36 (0.00) | 18 (0.28) | 0.74 |
| 11-01 | Gp3 | g.chr7:69900767G>C   | Splice Site       | AUTS2    | p.K230N  | autism susceptibility carrier 45 (0.00)               | 26 (0.19) | 0.51      |      |
| 11-01 | Gp3 | g.chr7:70227988C>A   | Missense Mutation | AUTS2    | p.P292H  | autism susceptibility carrier 47 (0.00)               | 85 (0.21) | 0.56      |      |
| 11-01 | Gp3 | g.chr17:63537606C>G  | Missense Mutation | AXIN2    | p.K342N  | axin 2                                                | 54 (0.00) | 44 (0.23) | 0.61 |
| 11-01 | Gp3 | g.chr17:79176168G>C  | Silent            | AZII     | p.G220G  |                                                       | 22 (0.00) | 33 (0.18) | 0.48 |
| 11-01 | Gp3 | g.chr1:235647728G>A  | Silent            | B3GALNT2 | p.I155I  | beta-1,3-N-acetylgalactosaminidase 47 (0.00)          | 50 (0.24) | 0.64      |      |
| 11-01 | Gp3 | g.chr2:62449741C>A   | Nonsense Mutation | B3GNT2   | p.S129*  | UDP-GlcNAc:betaGalactosyltransferase 58 (0.00)        | 28 (0.32) | 0.86      |      |
| 11-01 | Gp3 | g.chr6:70071273C>T   | Nonsense Mutation | BAI3     | p.Q1370* | brain-specific angiogenesis inhibitor 90 (0.00)       | 22 (0.32) | 0.85      |      |
| 11-01 | Gp3 | g.chr17:79077767G>T  | Missense Mutation | BAIAP2   | p.D172Y  | BAI1-associated protein 15 (0.00)                     | 26 (0.19) | 0.51      |      |
| 11-01 | Gp3 | g.chr14:35245657T>A  | Missense Mutation | BAZ1A    | p.R767S  | bromodomain adjacent to zinc finger domain 56 (0.00)  | 23 (0.48) | 1.28      |      |
| 11-01 | Gp3 | g.chr7:72856630C>G   | Missense Mutation | BAZ1B    | p.V1450L | bromodomain adjacent to zinc finger domain 75 (0.00)  | 85 (0.16) | 0.44      |      |
| 11-01 | Gp3 | g.chr12:56998533G>A  | Silent            | BAZ2A    | p.D933D  | bromodomain adjacent to zinc finger domain 17 (0.00)  | 11 (0.45) | 1.21      |      |
| 11-01 | Gp3 | g.chr2:160289802C>T  | Missense Mutation | BAZ2B    | p.A456T  | bromodomain adjacent to zinc finger domain 148 (0.00) | 84 (0.19) | 0.51      |      |
| 11-01 | Gp3 | g.chr4:123664326A>T  | Missense Mutation | BBS12    | p.I427L  | Bardet-Biedl syndrome 82 (0.00)                       | 49 (0.14) | 0.38      |      |
| 11-01 | Gp3 | g.chr16:56519572G>C  | Missense Mutation | BBS2     | p.N663K  | Bardet-Biedl syndrome 55 (0.00)                       | 19 (0.53) | 1.40      |      |
| 11-01 | Gp3 | g.chr19:45317413C>T  | Silent            | BCAM     | p.P263P  | basal cell adhesion molecule 22 (0.00)                | 29 (0.38) | 1.01      |      |
| 11-01 | Gp3 | g.chr1:156621482G>A  | Splice Site       | BCAN     |          | brevican                                              | 44 (0.00) | 27 (0.22) | 0.59 |
| 11-01 | Gp3 | g.chr20:52601849G>A  | Silent            | BCAS1    | p.L373L  | breast carcinoma amplification factor 63 (0.00)       | 58 (0.33) | 0.87      |      |
| 11-01 | Gp3 | g.chr19:41920012C>A  | Missense Mutation | BCKDHA   | p.A145D  | branched chain ketoacid dehydrogenase 24 (0.00)       | 13 (0.54) | 1.44      |      |
| 11-01 | Gp3 | g.chr15:52402134G>A  | Missense Mutation | BCL2L10  | p.T199I  | BCL2-like 10 (apoptosis inhibitor 40 (0.00)           | 17 (0.29) | 0.78      |      |
| 11-01 | Gp3 | g.chr12:122492782C>A | Missense Mutation | BCL7A    | p.Q171K  | B-cell CLL/lymphoma 769 (0.00)                        | 41 (0.29) | 0.78      |      |



|       |     |                      |                   |         |          |                           |            |            |      |
|-------|-----|----------------------|-------------------|---------|----------|---------------------------|------------|------------|------|
| 11-01 | Gp3 | g.chr1:147091188G>T  | Missense Mutation | BCL9    | p.M409I  | B-cell CLL/lymphoma 9     | 76 (0.00)  | 54 (0.15)  | 0.40 |
| 11-01 | Gp3 | g.chr6:136599333G>A  | Missense Mutation | BCLAF1  | p.P229L  | BCL2-associated transcr   | 87 (0.00)  | 31 (0.16)  | 0.43 |
| 11-01 | Gp3 | g.chr16:81320964C>A  | Missense Mutation | BCMO1   | p.A456E  |                           | 49 (0.00)  | 33 (0.21)  | 0.45 |
| 11-01 | Gp3 | g.chr11:112064333G>A | Missense Mutation | BCO2    | p.E39K   | beta-carotene oxygenase   | 66 (0.00)  | 53 (0.23)  | 0.60 |
| 11-01 | Gp3 | g.chrX:39934064G>A   | Missense Mutation | BCOR    | p.L179F  | BCL6 corepressor          | 35 (0.00)  | 43 (0.26)  | 0.43 |
| 11-01 | Gp3 | g.chrX:129148115G>C  | Missense Mutation | BCORL1  | p.S456T  | BCL6 corepressor-like     | 118 (0.00) | 21 (0.29)  | 0.48 |
| 11-01 | Gp3 | g.chr10:13534804C>T  | Missense Mutation | BEND7   | p.R163K  | BEN domain containing     | 60 (0.00)  | 31 (0.23)  | 0.60 |
| 11-01 | Gp3 | g.chr12:70048943T>A  | Missense Mutation | BEST3   | p.D584V  | bestrophin 3              | 36 (0.00)  | 32 (0.19)  | 0.50 |
| 11-01 | Gp3 | g.chr12:70048984G>A  | Silent            | BEST3   | p.S570S  | bestrophin 3              | 48 (0.00)  | 28 (0.21)  | 0.57 |
| 11-01 | Gp3 | g.chr12:70049108G>A  | Missense Mutation | BEST3   | p.S529F  | bestrophin 3              | 67 (0.00)  | 42 (0.24)  | 0.63 |
| 11-01 | Gp3 | g.chr12:70049321C>T  | Missense Mutation | BEST3   | p.G458E  | bestrophin 3              | 53 (0.00)  | 41 (0.20)  | 0.52 |
| 11-01 | Gp3 | g.chr12:26277501G>A  | Missense Mutation | BHLHE41 | p.S26F   | basic helix-loop-helix fa | 49 (0.00)  | 52 (0.19)  | 0.51 |
| 11-01 | Gp3 | g.chr12:32481316G>T  | Missense Mutation | BICD1   | p.V643L  | bicaudal D homolog 1 (l   | 41 (0.00)  | 28 (0.18)  | 0.48 |
| 11-01 | Gp3 | g.chr12:32491864C>T  | Silent            | BICD1   | p.I905I  | bicaudal D homolog 1 (l   | 28 (0.00)  | 30 (0.80)  | 2.13 |
| 11-01 | Gp3 | g.chr11:102195535C>A | Missense Mutation | BIRC3   | p.L99I   | baculoviral IAP repeat c  | 41 (0.00)  | 40 (0.38)  | 1.00 |
| 11-01 | Gp3 | g.chr2:32631617C>A   | Missense Mutation | BIRC6   | p.S490Y  | baculoviral IAP repeat c  | 52 (0.00)  | 37 (0.16)  | 0.43 |
| 11-01 | Gp3 | g.chr2:32664611C>T   | Missense Mutation | BIRC6   | p.H1223Y | baculoviral IAP repeat c  | 53 (0.00)  | 59 (0.32)  | 0.86 |
| 11-01 | Gp3 | g.chr15:91267832G>A  | Intron            | BLM     |          | Bloom syndrome, RecQ      | 164 (0.00) | 107 (0.21) | 0.57 |
| 11-01 | Gp3 | g.chr15:91272857G>A  | Intron            | BLM     |          | Bloom syndrome, RecQ      | 46 (0.00)  | 33 (0.21)  | 0.57 |
| 11-01 | Gp3 | g.chr15:91286958G>T  | Intron            | BLM     |          | Bloom syndrome, RecQ      | 40 (0.00)  | 13 (0.38)  | 1.03 |
| 11-01 | Gp3 | g.chr15:91306494G>A  | Intron            | BLM     |          | Bloom syndrome, RecQ      | 72 (0.00)  | 26 (0.38)  | 1.03 |
| 11-01 | Gp3 | g.chr15:91318061G>A  | Intron            | BLM     |          | Bloom syndrome, RecQ      | 44 (0.00)  | 26 (0.27)  | 0.72 |
| 11-01 | Gp3 | g.chr15:91329939G>T  | Intron            | BLM     |          | Bloom syndrome, RecQ      | 25 (0.00)  | 17 (0.29)  | 0.78 |
| 11-01 | Gp3 | g.chr4:79832378G>T   | Nonsense Mutation | BMP2K   | p.E893*  | BMP2 inducible kinase     | 94 (0.01)  | 42 (0.14)  | 0.38 |
| 11-01 | Gp3 | g.chr6:7880504C>A    | Nonsense Mutation | BMP6    | p.Y490*  | bone morphogenetic pro    | 129 (0.00) | 61 (0.21)  | 0.57 |
| 11-01 | Gp3 | g.chr10:43287184G>A  | Nonsense Mutation | BMS1    | p.W249*  | BMS1 ribosome biogen      | 75 (0.00)  | 55 (0.31)  | 0.82 |
| 11-01 | Gp3 | g.chr15:59971887C>A  | Missense Mutation | BNIP2   | p.G67C   | BCL2/adenovirus E1B       | 169 (0.01) | 32 (0.38)  | 1.00 |
| 11-01 | Gp3 | g.chr4:13590374C>T   | Missense Mutation | BOD1L1  | p.G2751D | bioorientation of chromo  | 51 (0.00)  | 34 (0.15)  | 0.39 |
| 11-01 | Gp3 | g.chr13:73321171C>G  | Missense Mutation | BORA    | p.F468L  | bora, aurora kinase A ac  | 35 (0.00)  | 36 (0.39)  | 1.04 |
| 11-01 | Gp3 | g.chr20:31873953C>T  | Missense Mutation | BPIFB1  | p.P25L   | BPI fold containing fam   | 35 (0.00)  | 20 (0.30)  | 0.80 |
| 11-01 | Gp3 | g.chr20:31644440C>A  | Missense Mutation | BPIFB3  | p.L73M   | BPI fold containing fam   | 48 (0.00)  | 62 (0.19)  | 0.52 |
| 11-01 | Gp3 | g.chr17:65850301C>T  | Missense Mutation | BPTF    | p.H287Y  | bromodomain PHD fing      | 137 (0.01) | 114 (0.17) | 0.44 |
| 11-01 | Gp3 | g.chr17:65862691C>T  | Silent            | BPTF    | p.L516L  | bromodomain PHD fing      | 59 (0.00)  | 21 (0.38)  | 1.02 |
| 11-01 | Gp3 | g.chr17:65909222C>T  | Missense Mutation | BPTF    | p.P1741L | bromodomain PHD fing      | 156 (0.01) | 110 (0.20) | 0.53 |
| 11-01 | Gp3 | g.chr17:41199105G>C  | Intron            | BRCA1   |          | breast cancer 1, early on | 53 (0.00)  | 49 (0.27)  | 0.71 |

|       |     |                      |                   |           |          |                                             |           |      |
|-------|-----|----------------------|-------------------|-----------|----------|---------------------------------------------|-----------|------|
| 11-01 | Gp3 | g.chr17:41200643C>T  | Intron            | BRCA1     |          | breast cancer 1, early on43 (0.00)          | 44 (0.23) | 0.61 |
| 11-01 | Gp3 | g.chr17:41211556C>A  | Intron            | BRCA1     |          | breast cancer 1, early on110 (0.00)         | 65 (0.40) | 1.07 |
| 11-01 | Gp3 | g.chr17:41220070A>G  | Intron            | BRCA1     |          | breast cancer 1, early on64 (0.00)          | 22 (0.23) | 0.61 |
| 11-01 | Gp3 | g.chr17:41221268G>A  | Intron            | BRCA1     |          | breast cancer 1, early on47 (0.00)          | 30 (0.17) | 0.44 |
| 11-01 | Gp3 | g.chr17:41223037C>A  | Missense Mutation | BRCA1     | p.V1632L | breast cancer 1, early on41 (0.00)          | 42 (0.19) | 0.51 |
| 11-01 | Gp3 | g.chr17:41227535C>A  | Intron            | BRCA1     |          | breast cancer 1, early on100 (0.00)         | 33 (0.30) | 0.81 |
| 11-01 | Gp3 | g.chr17:41266636G>C  | Intron            | BRCA1     |          | breast cancer 1, early on98 (0.00)          | 46 (0.26) | 0.70 |
| 11-01 | Gp3 | g.chr13:32917888G>A  | Intron            | BRCA2     |          | breast cancer 2, early on56 (0.00)          | 30 (0.40) | 1.07 |
| 11-01 | Gp3 | g.chr13:32918357C>T  | Intron            | BRCA2     |          | breast cancer 2, early on42 (0.00)          | 23 (0.22) | 0.58 |
| 11-01 | Gp3 | g.chr13:32935957G>A  | Intron            | BRCA2     |          | breast cancer 2, early on69 (0.00)          | 74 (0.55) | 1.48 |
| 11-01 | Gp3 | g.chr13:32957610C>A  | Intron            | BRCA2     |          | breast cancer 2, early on114 (0.00)         | 46 (0.26) | 0.70 |
| 11-01 | Gp3 | g.chr13:32960288C>A  | Intron            | BRCA2     |          | breast cancer 2, early on52 (0.00)          | 35 (0.17) | 0.46 |
| 11-01 | Gp3 | g.chr13:32968178G>A  | Intron            | BRCA2     |          | breast cancer 2, early on49 (0.00)          | 17 (0.65) | 1.73 |
| 11-01 | Gp3 | g.chr13:32970886C>A  | Intron            | BRCA2     |          | breast cancer 2, early on66 (0.00)          | 35 (0.20) | 0.53 |
| 11-01 | Gp3 | g.chr5:137485483C>G  | Missense Mutation | BRD8      | p.E1042Q | bromodomain containin,19 (0.00)             | 15 (0.73) | 1.96 |
| 11-01 | Gp3 | g.chr5:878528C>G     | Missense Mutation | BRD9      | p.E405Q  | bromodomain containin,39 (0.00)             | 34 (0.18) | 0.47 |
| 11-01 | Gp3 | g.chr10:93713541G>A  | Missense Mutation | BTAF1     | p.M204I  | BTAF1 RNA polymerase,157 (0.00)             | 92 (0.16) | 0.43 |
| 11-01 | Gp3 | g.chr6:26505207G>A   | Missense Mutation | BTN1A1    | p.C161Y  | butyrophilin, subfamily 52 (0.00)           | 50 (0.18) | 0.48 |
| 11-01 | Gp3 | g.chr2:111408192G>C  | Missense Mutation | BUB1      | p.P712A  | BUB1 mitotic checkpoint,36 (0.00)           | 23 (0.22) | 0.58 |
| 11-01 | Gp3 | g.chr10:124457767C>T | Missense Mutation | C10orf120 | p.V164I  | chromosome 10 open reading frame,44 (0.02)  | 30 (0.20) | 0.53 |
| 11-01 | Gp3 | g.chr10:96954331C>G  | Missense Mutation | C10orf129 | p.T30S   | chromosome 10 open reading frame,34 (0.00)  | 16 (0.38) | 1.00 |
| 11-01 | Gp3 | g.chr10:50531129C>G  | Missense Mutation | C10orf71  | p.P180R  | chromosome 10 open reading frame,69 (0.00)  | 27 (0.19) | 0.49 |
| 11-01 | Gp3 | g.chr10:50532222C>T  | Silent            | C10orf71  | p.L544L  | chromosome 10 open reading frame,106 (0.01) | 38 (0.26) | 0.70 |
| 11-01 | Gp3 | g.chr10:103773778C>A | Missense Mutation | C10orf76  | p.V225L  | chromosome 10 open reading frame,66 (0.00)  | 84 (0.15) | 0.41 |
| 11-01 | Gp3 | g.chr10:103773783T>A | Splice Site       | C10orf76  |          | chromosome 10 open reading frame,66 (0.00)  | 85 (0.14) | 0.38 |
| 11-01 | Gp3 | g.chr10:128192949G>A | Missense Mutation | C10orf90  | p.P227S  | chromosome 10 open reading frame,45 (0.00)  | 28 (0.18) | 0.48 |
| 11-01 | Gp3 | g.chr11:111795050G>A | Splice Site       | C11orf52  | p.W11*   | chromosome 11 open reading frame,98 (0.00)  | 71 (0.18) | 0.49 |
| 11-01 | Gp3 | g.chr11:122774959G>T | Missense Mutation | C11orf63  | p.S224I  | chromosome 11 open reading frame,55 (0.00)  | 26 (0.35) | 0.92 |
| 11-01 | Gp3 | g.chr11:122828070G>T | Splice Site       | C11orf63  |          | chromosome 11 open reading frame,61 (0.00)  | 73 (0.18) | 0.47 |
| 11-01 | Gp3 | g.chr11:66581374G>A  | Silent            | C11orf80  | p.L141L  | chromosome 11 open reading frame,56 (0.00)  | 23 (0.30) | 0.81 |
| 11-01 | Gp3 | g.chr12:53699994C>T  | Missense Mutation | C12orf10  | p.R56C   | chromosome 12 open reading frame,23 (0.00)  | 21 (0.33) | 0.89 |
| 11-01 | Gp3 | g.chr12:48888640C>A  | Missense Mutation | C12orf54  | p.S101Y  | chromosome 12 open reading frame,61 (0.00)  | 29 (0.48) | 1.29 |
| 11-01 | Gp3 | g.chr14:23467931C>G  | Missense Mutation | C14orf93  | p.R101T  | chromosome 14 open reading frame,29 (0.00)  | 30 (0.23) | 0.62 |
| 11-01 | Gp3 | g.chr16:49433162C>A  | Missense Mutation | C16orf78  | p.F257L  | chromosome 16 open reading frame,41 (0.00)  | 22 (0.27) | 0.73 |
| 11-01 | Gp3 | g.chr17:34190562G>C  | Splice Site       | C17orf66  | p.A190G  | chromosome 17 open reading frame,24 (0.00)  | 28 (0.32) | 0.86 |

|       |     |                     |                   |              |          |                        |            |            |      |
|-------|-----|---------------------|-------------------|--------------|----------|------------------------|------------|------------|------|
| 11-01 | Gp3 | g.chr17:16344368C>T | RNA               | C17orf76-AS1 |          |                        | 100 (0.00) | 105 (0.20) | 0.53 |
| 11-01 | Gp3 | g.chr19:51301693C>G | Missense Mutation | C19orf48     | p.E5Q    | chromosome 19 open rea | 39 (0.00)  | 32 (0.19)  | 0.50 |
| 11-01 | Gp3 | g.chr1:162344163G>A | Missense Mutation | C1orf111     | p.T154I  | chromosome 1 open rea  | 96 (0.00)  | 75 (0.25)  | 0.68 |
| 11-01 | Gp3 | g.chr1:75038319G>A  | Silent            | C1orf173     | p.C1025C |                        | 28 (0.00)  | 35 (0.17)  | 0.46 |
| 11-01 | Gp3 | g.chr1:75038964C>T  | Silent            | C1orf173     | p.R810R  |                        | 30 (0.00)  | 30 (0.23)  | 0.62 |
| 11-01 | Gp3 | g.chr1:75072479C>A  | Missense Mutation | C1orf173     | p.R432M  |                        | 127 (0.00) | 66 (0.20)  | 0.53 |
| 11-01 | Gp3 | g.chr1:186388145G>T | Silent            | C1orf27      | p.V434V  | chromosome 1 open rea  | 22 (0.00)  | 34 (0.50)  | 1.33 |
| 11-01 | Gp3 | g.chr1:43263855G>A  | Missense Mutation | C1orf50      | p.A223T  | chromosome 1 open rea  | 144 (0.00) | 90 (0.36)  | 0.95 |
| 11-01 | Gp3 | g.chr1:150255808C>G | Missense Mutation | C1orf51      | p.P44R   |                        | 49 (0.00)  | 35 (0.26)  | 0.69 |
| 11-01 | Gp3 | g.chr1:150257044A>T | Missense Mutation | C1orf51      | p.M187L  |                        | 23 (0.00)  | 12 (0.42)  | 1.11 |
| 11-01 | Gp3 | g.chr1:152692379C>T | Nonsense Mutation | C1orf68      | p.Q128*  | chromosome 1 open rea  | 113 (0.00) | 50 (0.36)  | 0.96 |
| 11-01 | Gp3 | g.chr1:156263818G>A | Silent            | C1orf85      | p.A263A  | chromosome 1 open rea  | 34 (0.00)  | 27 (0.30)  | 0.79 |
| 11-01 | Gp3 | g.chr1:60463415G>A  | Missense Mutation | C1orf87      | p.P449L  | chromosome 1 open rea  | 41 (0.00)  | 58 (0.24)  | 0.64 |
| 11-01 | Gp3 | g.chr1:60521014G>T  | Silent            | C1orf87      | p.P68P   | chromosome 1 open rea  | 106 (0.00) | 62 (0.45)  | 1.20 |
| 11-01 | Gp3 | g.chr5:34043091G>A  | Missense Mutation | C1QTNF3      | p.T47I   | C1q and tumor necrosis | 97 (0.00)  | 45 (0.18)  | 0.47 |
| 11-01 | Gp3 | g.chr13:24895659C>T | Missense Mutation | C1QTNF9      | p.T252I  | C1q and tumor necrosis | 72 (0.01)  | 40 (0.30)  | 0.80 |
| 11-01 | Gp3 | g.chr13:24895880G>A | Missense Mutation | C1QTNF9      | p.G326R  | C1q and tumor necrosis | 100 (0.00) | 71 (0.17)  | 0.45 |
| 11-01 | Gp3 | g.chr20:20079443G>C | Missense Mutation | C20orf26     | p.V282L  |                        | 41 (0.00)  | 16 (0.50)  | 1.33 |
| 11-01 | Gp3 | g.chr20:20180469C>A | Silent            | C20orf26     | p.R619R  |                        | 80 (0.00)  | 94 (0.32)  | 0.85 |
| 11-01 | Gp3 | g.chr20:20180521C>T | Missense Mutation | C20orf26     | p.P636L  |                        | 65 (0.00)  | 49 (0.14)  | 0.38 |
| 11-01 | Gp3 | g.chr22:19839384T>A | Missense Mutation | C22orf29     | p.D134V  | chromosome 22 open re  | 125 (0.00) | 141 (0.16) | 0.42 |
| 11-01 | Gp3 | g.chr11:73748635C>A | Missense Mutation | C2CD3        | p.Q1923H | C2 calcium-dependent d | 55 (0.00)  | 58 (0.16)  | 0.41 |
| 11-01 | Gp3 | g.chr12:22637656C>G | Missense Mutation | C2CD5        | p.G509R  | C2 calcium-dependent d | 55 (0.00)  | 37 (0.16)  | 0.43 |
| 11-01 | Gp3 | g.chr12:22678633C>T | Missense Mutation | C2CD5        | p.R119H  | C2 calcium-dependent d | 79 (0.00)  | 72 (0.29)  | 0.78 |
| 11-01 | Gp3 | g.chr2:27800169C>T  | Nonsense Mutation | C2orf16      | p.R244*  | chromosome 2 open rea  | 90 (0.00)  | 48 (0.15)  | 0.39 |
| 11-01 | Gp3 | g.chr2:24260619C>T  | Silent            | C2orf44      | p.L582L  | chromosome 2 open rea  | 128 (0.00) | 70 (0.33)  | 0.88 |
| 11-01 | Gp3 | g.chr2:29295037G>T  | Silent            | C2orf71      | p.G697G  | chromosome 2 open rea  | 37 (0.00)  | 19 (0.26)  | 0.70 |
| 11-01 | Gp3 | g.chr19:6685152G>A  | Silent            | C3           | p.T1272T | complement component   | 24 (0.00)  | 15 (0.33)  | 0.89 |
| 11-01 | Gp3 | g.chr3:118866290C>T | Silent            | C3orf30      | p.I418I  | chromosome 3 open rea  | 94 (0.00)  | 61 (0.15)  | 0.39 |
| 11-01 | Gp3 | g.chr3:118870080G>A | Missense Mutation | C3orf30      | p.E518K  | chromosome 3 open rea  | 105 (0.00) | 54 (0.15)  | 0.40 |
| 11-01 | Gp3 | g.chr4:113507733T>C | Missense Mutation | C4orf21      | p.S1262G |                        | 57 (0.00)  | 13 (0.46)  | 1.23 |
| 11-01 | Gp3 | g.chr4:128949890C>T | Silent            | C4orf29      | p.R320R  | chromosome 4 open rea  | 92 (0.00)  | 93 (0.15)  | 0.40 |
| 11-01 | Gp3 | g.chr4:130023885G>T | Missense Mutation | C4orf33      | p.R40S   | chromosome 4 open rea  | 65 (0.00)  | 53 (0.19)  | 0.50 |
| 11-01 | Gp3 | g.chr19:47823691G>A | Silent            | C5AR1        | p.T219T  | complement component   | 26 (0.00)  | 38 (0.16)  | 0.42 |
| 11-01 | Gp3 | g.chr5:134782433C>A | Missense Mutation | C5orf20      | p.Q122H  |                        | 46 (0.00)  | 32 (0.16)  | 0.42 |

|       |     |                     |                   |          |          |                         |             |            |      |
|-------|-----|---------------------|-------------------|----------|----------|-------------------------|-------------|------------|------|
| 11-01 | Gp3 | g.chr5:31545778C>G  | Missense Mutation | C5orf22  | p.Q340E  | chromosome 5 open rea   | 59 (0.00)   | 52 (0.52)  | 1.38 |
| 11-01 | Gp3 | g.chr5:37138892C>T  | Missense Mutation | C5orf42  | p.D2854N | chromosome 5 open rea   | 124 (0.01)  | 99 (0.20)  | 0.54 |
| 11-01 | Gp3 | g.chr5:37198918C>T  | Silent            | C5orf42  | p.K1186K | chromosome 5 open rea   | 26 (0.00)   | 17 (0.29)  | 0.78 |
| 11-01 | Gp3 | g.chr5:7832034C>A   | Missense Mutation | C5orf49  | p.A123S  | chromosome 5 open rea   | 43 (0.00)   | 29 (0.31)  | 0.83 |
| 11-01 | Gp3 | g.chr5:7832083C>A   | Missense Mutation | C5orf49  | p.Q106H  | chromosome 5 open rea   | 50 (0.00)   | 30 (0.17)  | 0.44 |
| 11-01 | Gp3 | g.chr5:171217852G>T | Missense Mutation | C5orf50  | p.R93S   |                         | 64 (0.00)   | 27 (0.26)  | 0.69 |
| 11-01 | Gp3 | g.chr6:88074817G>T  | Missense Mutation | C6orf163 | p.E231D  | chromosome 6 open rea   | 69 (0.01)   | 17 (0.47)  | 0.74 |
| 11-01 | Gp3 | g.chr6:36294411G>A  | Silent            | C6orf222 | p.H304H  | chromosome 6 open rea   | 138 (0.00)  | 79 (0.38)  | 1.01 |
| 11-01 | Gp3 | g.chr7:25175953G>T  | Missense Mutation | C7orf31  | p.L471I  | chromosome 7 open rea   | 85 (0.00)   | 33 (0.18)  | 0.48 |
| 11-01 | Gp3 | g.chr7:50136123G>T  | Nonsense Mutation | C7orf72  | p.G148*  | chromosome 7 open rea   | 30 (0.00)   | 25 (0.36)  | 0.96 |
| 11-01 | Gp3 | g.chr8:96281289G>A  | Silent            | C8orf37  | p.N43N   | chromosome 8 open rea   | 67 (0.00)   | 174 (0.15) | 0.50 |
| 11-01 | Gp3 | g.chr9:35045344C>G  | Missense Mutation | C9orf131 | p.H906Q  | chromosome 9 open rea   | 122 (0.00)  | 56 (0.23)  | 0.62 |
| 11-01 | Gp3 | g.chr9:97522087G>T  | Missense Mutation | C9orf3   | p.A8S    | chromosome 9 open rea   | 64 (0.00)   | 68 (0.21)  | 0.55 |
| 11-01 | Gp3 | g.chr9:97522648C>A  | Missense Mutation | C9orf3   | p.P195T  | chromosome 9 open rea   | 62 (0.00)   | 24 (0.33)  | 0.89 |
| 11-01 | Gp3 | g.chr9:77614646C>A  | Splice Site       | C9orf41  | p.R244I  | chromosome 9 open rea   | 31 (0.00)   | 24 (0.46)  | 1.50 |
| 11-01 | Gp3 | g.chr9:132591818G>A | Missense Mutation | C9orf78  | p.A182V  | chromosome 9 open rea   | 95 (0.01)   | 136 (0.31) | 0.82 |
| 11-01 | Gp3 | g.chr9:136256541C>A | Missense Mutation | C9orf96  | p.D184E  |                         | 28 (0.00)   | 45 (0.49)  | 1.30 |
| 11-01 | Gp3 | g.chr17:49710938G>A | Missense Mutation | CA10     | p.P288L  | carbonic anhydrase X    | 31 (0.00)   | 26 (0.27)  | 0.72 |
| 11-01 | Gp3 | g.chr8:86389481C>G  | Missense Mutation | CA2      | p.P214A  | carbonic anhydrase II   | 24 (0.00)   | 19 (0.26)  | 0.88 |
| 11-01 | Gp3 | g.chr13:49951120G>T | Missense Mutation | CAB39L   | p.Q87K   | calcium binding protein | 56 (0.00)   | 25 (0.20)  | 0.53 |
| 11-01 | Gp3 | g.chr1:65129497C>G  | Missense Mutation | CACHD1   | p.L640V  | cache domain containin  | 82 (0.00)   | 43 (0.44)  | 1.18 |
| 11-01 | Gp3 | g.chr1:65147723C>T  | Nonsense Mutation | CACHD1   | p.R1123* | cache domain containin  | 62 (0.00)   | 57 (0.18)  | 0.47 |
| 11-01 | Gp3 | g.chr19:13345815C>A | Missense Mutation | CACNA1A  | p.E1723D | calcium channel, voltag | 77 (0.00)   | 68 (0.28)  | 0.75 |
| 11-01 | Gp3 | g.chr19:13423522C>A | Silent            | CACNA1A  | p.R543R  | calcium channel, voltag | 45 (0.00)   | 37 (0.46)  | 1.23 |
| 11-01 | Gp3 | g.chr12:2566832C>A  | Missense Mutation | CACNA1C  | p.F239L  | calcium channel, voltag | 115 (0.00)  | 104 (0.20) | 0.54 |
| 11-01 | Gp3 | g.chr12:2695009G>A  | Missense Mutation | CACNA1C  | p.M823I  | calcium channel, voltag | 138 (0.01)  | 71 (0.21)  | 0.56 |
| 11-01 | Gp3 | g.chr12:2786274G>A  | Missense Mutation | CACNA1C  | p.V1663I | calcium channel, voltag | 58 (0.00)   | 28 (0.21)  | 0.57 |
| 11-01 | Gp3 | g.chr1:181707532G>A | Silent            | CACNA1E  | p.T1194T | calcium channel, voltag | 226 (0.00)  | 115 (0.15) | 0.39 |
| 11-01 | Gp3 | g.chr22:40061917G>A | Missense Mutation | CACNA1I  | p.G1337D | calcium channel, voltag | 40 (0.00)   | 37 (0.51)  | 1.37 |
| 11-01 | Gp3 | g.chr1:201028422G>A | Silent            | CACNA1S  | p.Y1140Y | calcium channel, voltag | 35 (0.00)   | 16 (0.50)  | 1.33 |
| 11-01 | Gp3 | g.chr3:54798295G>A  | Missense Mutation | CACNA2D3 | p.E433K  | calcium channel, voltag | 132 (0.00)  | 71 (0.24)  | 0.64 |
| 11-01 | Gp3 | g.chr17:37334308G>A | Nonsense Mutation | CACNB1   | p.R359*  | calcium channel, voltag | 55 (0.00)   | 27 (0.19)  | 0.49 |
| 11-01 | Gp3 | g.chr3:85013798A>G  | Intron            | CADM2    |          | cell adhesion molecule  | 262 (0.00)  | 39 (0.23)  | 0.62 |
| 11-01 | Gp3 | g.chr3:85014855C>T  | Intron            | CADM2    |          | cell adhesion molecule  | 225 (0.00)  | 49 (0.22)  | 0.60 |
| 11-01 | Gp3 | g.chr3:85042350G>A  | Intron            | CADM2    |          | cell adhesion molecule  | 2145 (0.00) | 72 (0.24)  | 0.63 |

|       |     |                    |        |       |                                    |            |      |
|-------|-----|--------------------|--------|-------|------------------------------------|------------|------|
| 11-01 | Gp3 | g.chr3:85054210C>T | Intron | CADM2 | cell adhesion molecule 292 (0.00)  | 44 (0.16)  | 0.42 |
| 11-01 | Gp3 | g.chr3:85066449G>C | Intron | CADM2 | cell adhesion molecule 245 (0.00)  | 40 (0.15)  | 0.40 |
| 11-01 | Gp3 | g.chr3:85080966C>T | Intron | CADM2 | cell adhesion molecule 243 (0.00)  | 22 (0.32)  | 0.85 |
| 11-01 | Gp3 | g.chr3:85088255C>T | Intron | CADM2 | cell adhesion molecule 247 (0.02)  | 22 (0.23)  | 0.61 |
| 11-01 | Gp3 | g.chr3:85103725G>A | Intron | CADM2 | cell adhesion molecule 2134 (0.00) | 84 (0.14)  | 0.38 |
| 11-01 | Gp3 | g.chr3:85113305C>A | Intron | CADM2 | cell adhesion molecule 2105 (0.00) | 38 (0.16)  | 0.42 |
| 11-01 | Gp3 | g.chr3:85150208C>A | Intron | CADM2 | cell adhesion molecule 228 (0.00)  | 12 (0.42)  | 1.11 |
| 11-01 | Gp3 | g.chr3:85191354C>A | Intron | CADM2 | cell adhesion molecule 255 (0.02)  | 16 (0.31)  | 0.83 |
| 11-01 | Gp3 | g.chr3:85226015G>C | Intron | CADM2 | cell adhesion molecule 229 (0.00)  | 26 (0.23)  | 0.62 |
| 11-01 | Gp3 | g.chr3:85259479T>C | Intron | CADM2 | cell adhesion molecule 232 (0.00)  | 33 (0.21)  | 0.57 |
| 11-01 | Gp3 | g.chr3:85265277C>G | Intron | CADM2 | cell adhesion molecule 284 (0.00)  | 41 (0.17)  | 0.46 |
| 11-01 | Gp3 | g.chr3:85315550G>C | Intron | CADM2 | cell adhesion molecule 217 (0.00)  | 19 (0.47)  | 1.26 |
| 11-01 | Gp3 | g.chr3:85330075G>A | Intron | CADM2 | cell adhesion molecule 217 (0.00)  | 20 (0.35)  | 0.93 |
| 11-01 | Gp3 | g.chr3:85335082G>C | Intron | CADM2 | cell adhesion molecule 224 (0.00)  | 15 (0.73)  | 1.96 |
| 11-01 | Gp3 | g.chr3:85348878C>A | Intron | CADM2 | cell adhesion molecule 253 (0.00)  | 32 (0.16)  | 0.42 |
| 11-01 | Gp3 | g.chr3:85384408C>A | Intron | CADM2 | cell adhesion molecule 256 (0.00)  | 27 (0.19)  | 0.49 |
| 11-01 | Gp3 | g.chr3:85404159C>A | Intron | CADM2 | cell adhesion molecule 247 (0.02)  | 32 (0.19)  | 0.50 |
| 11-01 | Gp3 | g.chr3:85410685G>A | Intron | CADM2 | cell adhesion molecule 2128 (0.00) | 68 (0.19)  | 0.51 |
| 11-01 | Gp3 | g.chr3:85410793C>A | Intron | CADM2 | cell adhesion molecule 286 (0.00)  | 22 (0.27)  | 0.73 |
| 11-01 | Gp3 | g.chr3:85427824C>G | Intron | CADM2 | cell adhesion molecule 268 (0.00)  | 33 (0.15)  | 0.40 |
| 11-01 | Gp3 | g.chr3:85431047C>T | Intron | CADM2 | cell adhesion molecule 222 (0.00)  | 15 (0.33)  | 0.89 |
| 11-01 | Gp3 | g.chr3:85438934C>T | Intron | CADM2 | cell adhesion molecule 227 (0.00)  | 21 (0.52)  | 1.40 |
| 11-01 | Gp3 | g.chr3:85458721C>A | Intron | CADM2 | cell adhesion molecule 256 (0.00)  | 46 (0.20)  | 0.52 |
| 11-01 | Gp3 | g.chr3:85471020C>T | Intron | CADM2 | cell adhesion molecule 275 (0.00)  | 43 (0.21)  | 0.56 |
| 11-01 | Gp3 | g.chr3:85472283G>A | Intron | CADM2 | cell adhesion molecule 217 (0.00)  | 28 (0.39)  | 1.05 |
| 11-01 | Gp3 | g.chr3:85479222G>T | Intron | CADM2 | cell adhesion molecule 270 (0.00)  | 40 (0.23)  | 0.60 |
| 11-01 | Gp3 | g.chr3:85544011G>T | Intron | CADM2 | cell adhesion molecule 246 (0.00)  | 13 (0.38)  | 1.03 |
| 11-01 | Gp3 | g.chr3:85560293C>T | Intron | CADM2 | cell adhesion molecule 2182 (0.01) | 100 (0.16) | 0.43 |
| 11-01 | Gp3 | g.chr3:85560294C>T | Intron | CADM2 | cell adhesion molecule 2181 (0.01) | 100 (0.16) | 0.43 |
| 11-01 | Gp3 | g.chr3:85576462G>A | Intron | CADM2 | cell adhesion molecule 2101 (0.00) | 94 (0.20)  | 0.54 |
| 11-01 | Gp3 | g.chr3:85578402G>T | Intron | CADM2 | cell adhesion molecule 297 (0.00)  | 33 (0.21)  | 0.57 |
| 11-01 | Gp3 | g.chr3:85599362C>T | Intron | CADM2 | cell adhesion molecule 234 (0.00)  | 27 (0.59)  | 1.58 |
| 11-01 | Gp3 | g.chr3:85603670G>A | Intron | CADM2 | cell adhesion molecule 279 (0.00)  | 47 (0.15)  | 0.40 |
| 11-01 | Gp3 | g.chr3:85632073T>A | Intron | CADM2 | cell adhesion molecule 260 (0.00)  | 33 (0.15)  | 0.40 |
| 11-01 | Gp3 | g.chr3:85662163G>A | Intron | CADM2 | cell adhesion molecule 280 (0.00)  | 22 (0.23)  | 0.61 |

|       |     |                     |                   |         |          |                                     |            |           |      |
|-------|-----|---------------------|-------------------|---------|----------|-------------------------------------|------------|-----------|------|
| 11-01 | Gp3 | g.chr3:85670914C>T  | Intron            | CADM2   |          | cell adhesion molecule 271 (0.00)   | 54 (0.15)  | 0.40      |      |
| 11-01 | Gp3 | g.chr3:85691169C>A  | Intron            | CADM2   |          | cell adhesion molecule 233 (0.00)   | 30 (0.80)  | 2.13      |      |
| 11-01 | Gp3 | g.chr3:85707077G>A  | Intron            | CADM2   |          | cell adhesion molecule 280 (0.00)   | 74 (0.15)  | 0.40      |      |
| 11-01 | Gp3 | g.chr3:85712593G>C  | Intron            | CADM2   |          | cell adhesion molecule 2153 (0.00)  | 120 (0.17) | 0.47      |      |
| 11-01 | Gp3 | g.chr3:85719172G>T  | Intron            | CADM2   |          | cell adhesion molecule 257 (0.00)   | 66 (0.15)  | 0.40      |      |
| 11-01 | Gp3 | g.chr3:85763900G>A  | Intron            | CADM2   |          | cell adhesion molecule 2170 (0.00)  | 83 (0.16)  | 0.42      |      |
| 11-01 | Gp3 | g.chr3:85783504C>A  | Intron            | CADM2   |          | cell adhesion molecule 2103 (0.00)  | 58 (0.16)  | 0.41      |      |
| 11-01 | Gp3 | g.chr3:85795786C>A  | Intron            | CADM2   |          | cell adhesion molecule 253 (0.00)   | 29 (0.28)  | 0.74      |      |
| 11-01 | Gp3 | g.chr3:85795787T>C  | Intron            | CADM2   |          | cell adhesion molecule 251 (0.00)   | 29 (0.28)  | 0.74      |      |
| 11-01 | Gp3 | g.chr3:85822175G>A  | Intron            | CADM2   |          | cell adhesion molecule 264 (0.00)   | 22 (0.32)  | 0.85      |      |
| 11-01 | Gp3 | g.chr3:85856295G>A  | Intron            | CADM2   |          | cell adhesion molecule 262 (0.00)   | 47 (0.17)  | 0.45      |      |
| 11-01 | Gp3 | g.chr3:85865567C>A  | Intron            | CADM2   |          | cell adhesion molecule 233 (0.00)   | 42 (0.19)  | 0.51      |      |
| 11-01 | Gp3 | g.chr3:85866808C>G  | Intron            | CADM2   |          | cell adhesion molecule 249 (0.00)   | 27 (0.22)  | 0.59      |      |
| 11-01 | Gp3 | g.chr3:85882167G>A  | Intron            | CADM2   |          | cell adhesion molecule 222 (0.00)   | 32 (0.16)  | 0.42      |      |
| 11-01 | Gp3 | g.chr3:85886807G>C  | Intron            | CADM2   |          | cell adhesion molecule 275 (0.00)   | 81 (0.19)  | 0.49      |      |
| 11-01 | Gp3 | g.chr3:85891463G>T  | Intron            | CADM2   |          | cell adhesion molecule 237 (0.03)   | 18 (0.56)  | 1.48      |      |
| 11-01 | Gp3 | g.chr3:85962812G>C  | Intron            | CADM2   |          | cell adhesion molecule 262 (0.00)   | 31 (0.16)  | 0.43      |      |
| 11-01 | Gp3 | g.chr3:85988147G>T  | Intron            | CADM2   |          | cell adhesion molecule 273 (0.00)   | 44 (0.16)  | 0.42      |      |
| 11-01 | Gp3 | g.chr3:86001206T>C  | Intron            | CADM2   |          | cell adhesion molecule 236 (0.00)   | 37 (0.19)  | 0.50      |      |
| 11-01 | Gp3 | g.chr3:86001964A>T  | Intron            | CADM2   |          | cell adhesion molecule 227 (0.00)   | 43 (0.23)  | 0.62      |      |
| 11-01 | Gp3 | g.chr3:86002012C>T  | Intron            | CADM2   |          | cell adhesion molecule 238 (0.00)   | 38 (0.24)  | 0.63      |      |
| 11-01 | Gp3 | g.chr3:86003651G>A  | Intron            | CADM2   |          | cell adhesion molecule 245 (0.00)   | 17 (0.35)  | 0.94      |      |
| 11-01 | Gp3 | g.chr3:86023106C>T  | Intron            | CADM2   |          | cell adhesion molecule 2268 (0.00)  | 225 (0.17) | 0.46      |      |
| 11-01 | Gp3 | g.chr3:86032441G>A  | Intron            | CADM2   |          | cell adhesion molecule 249 (0.00)   | 35 (0.14)  | 0.38      |      |
| 11-01 | Gp3 | g.chr3:86034091C>T  | Intron            | CADM2   |          | cell adhesion molecule 225 (0.00)   | 17 (0.35)  | 0.94      |      |
| 11-01 | Gp3 | g.chr3:86049421G>A  | Intron            | CADM2   |          | cell adhesion molecule 232 (0.00)   | 40 (0.30)  | 0.80      |      |
| 11-01 | Gp3 | g.chr3:86055457C>G  | Intron            | CADM2   |          | cell adhesion molecule 244 (0.00)   | 37 (0.19)  | 0.50      |      |
| 11-01 | Gp3 | g.chr3:86062669C>T  | Intron            | CADM2   |          | cell adhesion molecule 249 (0.02)   | 29 (0.69)  | 1.84      |      |
| 11-01 | Gp3 | g.chr3:86078640T>C  | Intron            | CADM2   |          | cell adhesion molecule 2114 (0.00)  | 46 (0.24)  | 0.64      |      |
| 11-01 | Gp3 | g.chr3:86098964C>A  | Intron            | CADM2   |          | cell adhesion molecule 224 (0.00)   | 30 (0.17)  | 0.44      |      |
| 11-01 | Gp3 | g.chr3:62543174C>A  | Silent            | CADPS   | p.T553T  | Ca <sup>++</sup> -dependent secreti | 63 (0.00)  | 47 (0.26) | 0.68 |
| 11-01 | Gp3 | g.chr7:121960340C>T | Missense Mutation | CADPS2  | p.S1216N | Ca <sup>++</sup> -dependent secreti | 158 (0.01) | 84 (0.18) | 0.48 |
| 11-01 | Gp3 | g.chr3:9804885G>C   | Silent            | CAMK1   | p.P76P   | calcium/calmodulin-dep              | 67 (0.00)  | 40 (0.15) | 0.40 |
| 11-01 | Gp3 | g.chr3:49898923C>G  | Silent            | CAMKV   | p.L130L  | CaM kinase-like vesicle             | 24 (0.00)  | 28 (0.32) | 0.86 |
| 11-01 | Gp3 | g.chr9:138714176C>A | Missense Mutation | CAMSAP1 | p.M777I  | calmodulin regulated sp             | 39 (0.00)  | 47 (0.19) | 0.51 |

|       |     |                      |                   |          |          |                                      |            |      |
|-------|-----|----------------------|-------------------|----------|----------|--------------------------------------|------------|------|
| 11-01 | Gp3 | g.chr1:200818328G>A  | Missense Mutation | CAMSAP2  | p.E811K  | calmodulin regulated sp 55 (0.00)    | 34 (0.29)  | 0.78 |
| 11-01 | Gp3 | g.chr1:7804968C>G    | Missense Mutation | CAMTA1   | p.P1419R | calmodulin binding tran 52 (0.00)    | 27 (0.33)  | 0.89 |
| 11-01 | Gp3 | g.chr3:12859348C>A   | Missense Mutation | CAND2    | p.P973T  | cullin-associated and ne 22 (0.00)   | 39 (0.15)  | 0.41 |
| 11-01 | Gp3 | g.chr2:30964811C>A   | Missense Mutation | CAPN13   | p.G500V  | calpain 13 50 (0.00)                 | 36 (0.22)  | 0.59 |
| 11-01 | Gp3 | g.chr2:30993292C>T   | Silent            | CAPN13   | p.V137V  | calpain 13 133 (0.00)                | 99 (0.16)  | 0.43 |
| 11-01 | Gp3 | g.chr11:34101245G>C  | Missense Mutation | CAPRN1   | p.Q253H  | cell cycle associated pro 79 (0.00)  | 32 (0.31)  | 0.83 |
| 11-01 | Gp3 | g.chr12:18891266G>T  | Missense Mutation | CAPZA3   | p.A22S   | capping protein (actin fi 69 (0.00)  | 26 (0.19)  | 0.51 |
| 11-01 | Gp3 | g.chr1:19683205G>A   | Missense Mutation | CAPZB    | p.S197F  | capping protein (actin fi 115 (0.01) | 46 (0.22)  | 0.58 |
| 11-01 | Gp3 | g.chr19:48741784C>A  | Missense Mutation | CARD8    | p.S22I   | caspase recruitment don 70 (0.00)    | 55 (0.20)  | 0.53 |
| 11-01 | Gp3 | g.chr16:8949158C>T   | Missense Mutation | CARHSP1  | p.E103K  | calcium regulated heat s 32 (0.00)   | 36 (0.25)  | 0.67 |
| 11-01 | Gp3 | g.chr13:111353839G>A | Silent            | CARS2    | p.V113V  | cysteinyl-tRNA synthetæ 59 (0.00)    | 38 (0.21)  | 0.56 |
| 11-01 | Gp3 | g.chr6:90576085G>A   | RNA               | CASP8AP2 |          | caspase 8 associated pro 47 (0.00)   | 19 (0.32)  | 0.50 |
| 11-01 | Gp3 | g.chr20:32212589G>T  | Missense Mutation | CBFA2T2  | p.D238Y  | core-binding factor, runt 139 (0.00) | 63 (0.21)  | 0.55 |
| 11-01 | Gp3 | g.chr14:24897022G>A  | Silent            | CBLN3    | p.F146F  | cerebellin 3 precursor 136 (0.00)    | 64 (0.19)  | 0.50 |
| 11-01 | Gp3 | g.chr1:52821452C>T   | Missense Mutation | CC2D1B   | p.A713T  | coiled-coil and C2 domæ 46 (0.00)    | 62 (0.19)  | 0.52 |
| 11-01 | Gp3 | g.chr4:15482411G>A   | Silent            | CC2D2A   | p.K69K   | coiled-coil and C2 domæ 54 (0.00)    | 40 (0.17)  | 0.47 |
| 11-01 | Gp3 | g.chr2:219886626C>T  | Silent            | CCDC108  | p.G1002G | coiled-coil domain contæ 147 (0.01)  | 204 (0.15) | 0.39 |
| 11-01 | Gp3 | g.chr2:219888771T>C  | Missense Mutation | CCDC108  | p.Y854C  | coiled-coil domain contæ 37 (0.03)   | 57 (0.18)  | 0.47 |
| 11-01 | Gp3 | g.chr2:179912075C>T  | Missense Mutation | CCDC141  | p.G54D   | coiled-coil domain contæ 164 (0.00)  | 142 (0.20) | 0.53 |
| 11-01 | Gp3 | g.chr4:77283435C>A   | Nonsense Mutation | CCDC158  | p.E622*  | coiled-coil domain contæ 93 (0.00)   | 33 (0.36)  | 0.97 |
| 11-01 | Gp3 | g.chr4:77283446G>A   | Missense Mutation | CCDC158  | p.A618V  | coiled-coil domain contæ 86 (0.00)   | 32 (0.38)  | 1.00 |
| 11-01 | Gp3 | g.chr6:109616795C>T  | RNA               | CCDC162P |          | coiled-coil domain contæ 58 (0.00)   | 30 (0.30)  | 0.47 |
| 11-01 | Gp3 | g.chr6:151859277C>T  | Missense Mutation | CCDC170  | p.S95L   | coiled-coil domain contæ 59 (0.00)   | 40 (0.15)  | 0.40 |
| 11-01 | Gp3 | g.chr6:151917524C>T  | Missense Mutation | CCDC170  | p.R508W  | coiled-coil domain contæ 53 (0.00)   | 24 (0.25)  | 0.67 |
| 11-01 | Gp3 | g.chr1:93683421G>T   | Nonsense Mutation | CCDC18   | p.E652*  | coiled-coil domain contæ 31 (0.00)   | 12 (0.58)  | 1.56 |
| 11-01 | Gp3 | g.chr9:100111493G>A  | Silent            | CCDC180  | p.E969E  | coiled-coil domain contæ 39 (0.00)   | 47 (0.53)  | 1.42 |
| 11-01 | Gp3 | g.chr1:169390896C>T  | Missense Mutation | CCDC181  | p.R258K  | coiled-coil domain contæ 114 (0.00)  | 84 (0.20)  | 0.54 |
| 11-01 | Gp3 | g.chr1:43110474G>A   | Missense Mutation | CCDC30   | p.G629E  | coiled-coil domain contæ 217 (0.00)  | 146 (0.20) | 0.53 |
| 11-01 | Gp3 | g.chr12:94772600C>A  | Missense Mutation | CCDC41   | p.L256F  | 66 (0.00)                            | 36 (0.25)  | 0.85 |
| 11-01 | Gp3 | g.chr12:94794724G>C  | Missense Mutation | CCDC41   | p.L151V  | 19 (0.00)                            | 32 (0.38)  | 1.28 |
| 11-01 | Gp3 | g.chr13:52440042C>A  | Silent            | CCDC70   | p.A176A  | coiled-coil domain contæ 41 (0.00)   | 44 (0.16)  | 0.42 |
| 11-01 | Gp3 | g.chr3:49201437C>G   | Missense Mutation | CCDC71   | p.D69H   | coiled-coil domain contæ 30 (0.00)   | 23 (0.30)  | 0.81 |
| 11-01 | Gp3 | g.chr16:66803994G>C  | Missense Mutation | CCDC79   | p.S497R  | coiled-coil domain contæ 160 (0.01)  | 126 (0.15) | 0.40 |
| 11-01 | Gp3 | g.chr2:55529039G>A   | Silent            | CCDC88A  | p.G1519G | coiled-coil domain contæ 113 (0.00)  | 92 (0.15)  | 0.41 |
| 11-01 | Gp3 | g.chr5:68470230C>G   | Missense Mutation | CCNB1    | p.F233L  | cyclin B1 73 (0.00)                  | 31 (0.19)  | 0.52 |

|       |     |                      |                   |          |          |                            |            |           |      |
|-------|-----|----------------------|-------------------|----------|----------|----------------------------|------------|-----------|------|
| 11-01 | Gp3 | g.chr6:41908172G>T   | Missense Mutation | CCND3    | p.T117K  | cyclin D3                  | 39 (0.00)  | 47 (0.17) | 0.45 |
| 11-01 | Gp3 | g.chr4:78081971T>C   | Missense Mutation | CCNG2    | p.V125A  | cyclin G2                  | 43 (0.00)  | 30 (0.27) | 0.71 |
| 11-01 | Gp3 | g.chr5:86695296C>A   | Nonsense Mutation | CCNH     | p.E189*  | cyclin H                   | 90 (0.00)  | 56 (0.54) | 1.43 |
| 11-01 | Gp3 | g.chr10:97817676C>T  | Missense Mutation | CCNJ     | p.S277F  | cyclin J                   | 40 (0.00)  | 55 (0.24) | 0.63 |
| 11-01 | Gp3 | g.chr3:156868139C>A  | Missense Mutation | CCNL1    | p.V236L  | cyclin L1                  | 45 (0.00)  | 38 (0.26) | 0.70 |
| 11-01 | Gp3 | g.chr1:1328795G>T    | Missense Mutation | CCNL2    | p.H214N  | cyclin L2                  | 50 (0.00)  | 42 (0.33) | 0.89 |
| 11-01 | Gp3 | g.chr10:35855074C>T  | Silent            | CCNY     | p.P290P  | cyclin Y                   | 65 (0.00)  | 47 (0.26) | 0.68 |
| 11-01 | Gp3 | g.chr12:69987338C>A  | Silent            | CCT2     | p.V309V  | chaperonin containing T46  | 46 (0.00)  | 27 (0.30) | 0.79 |
| 11-01 | Gp3 | g.chr7:64526798A>T   | RNA               | CCT6P3   |          | chaperonin containing T22  | 22 (0.00)  | 16 (0.31) | 0.83 |
| 11-01 | Gp3 | g.chr22:17071952G>A  | Silent            | CCT8L2   | p.L497L  | chaperonin containing T99  | 99 (0.00)  | 41 (0.17) | 0.46 |
| 11-01 | Gp3 | g.chr6:74533297C>T   | Silent            | CD109    | p.H1426H | CD109 molecule             | 50 (0.00)  | 19 (0.42) | 1.12 |
| 11-01 | Gp3 | g.chr12:7639147G>T   | Silent            | CD163    | p.G802G  | CD163 molecule             | 40 (0.00)  | 24 (0.67) | 1.78 |
| 11-01 | Gp3 | g.chr12:7640154G>T   | Silent            | CD163    | p.A617A  | CD163 molecule             | 68 (0.00)  | 47 (0.15) | 0.40 |
| 11-01 | Gp3 | g.chr18:67540475G>A  | Silent            | CD226    | p.T245T  | CD226 molecule             | 26 (0.00)  | 16 (0.44) | 1.17 |
| 11-01 | Gp3 | g.chr6:47577011C>T   | Silent            | CD2AP    | p.C595C  | CD2-associated protein     | 146 (0.00) | 91 (0.16) | 0.44 |
| 11-01 | Gp3 | g.chr19:51729121C>T  | Silent            | CD33     | p.L161L  | CD33 molecule              | 52 (0.00)  | 17 (0.29) | 0.78 |
| 11-01 | Gp3 | g.chr17:7484231C>A   | Missense Mutation | CD68     | p.Q260K  | CD68 molecule              | 69 (0.00)  | 50 (0.16) | 0.43 |
| 11-01 | Gp3 | g.chr17:7484356G>T   | Missense Mutation | CD68     | p.Q301H  | CD68 molecule              | 59 (0.00)  | 29 (0.17) | 0.46 |
| 11-01 | Gp3 | g.chr2:87017597G>T   | Missense Mutation | CD8A     | p.T86N   | CD8a molecule              | 23 (0.00)  | 47 (0.15) | 0.40 |
| 11-01 | Gp3 | g.chr2:87042746C>A   | Missense Mutation | CD8B     | p.W209L  | CD8b molecule              | 88 (0.01)  | 47 (0.32) | 0.85 |
| 11-01 | Gp3 | g.chr2:107107362C>G  | RNA               | CD8BP    |          | CD8b molecule pseudo       | 54 (0.00)  | 37 (0.30) | 0.79 |
| 11-01 | Gp3 | g.chr19:14516575C>T  | Silent            | CD97     | p.L549L  | CD97 molecule              | 26 (0.00)  | 64 (0.19) | 0.50 |
| 11-01 | Gp3 | g.chr19:14517719C>A  | Silent            | CD97     | p.L718L  | CD97 molecule              | 55 (0.00)  | 73 (0.15) | 0.40 |
| 11-01 | Gp3 | g.chr19:14517733C>G  | Missense Mutation | CD97     | p.S723C  | CD97 molecule              | 69 (0.00)  | 97 (0.14) | 0.38 |
| 11-01 | Gp3 | g.chr13:49842138C>A  | Missense Mutation | CDADC1   | p.P315T  | cytidine and dCMP dea      | 25 (0.00)  | 11 (0.64) | 1.70 |
| 11-01 | Gp3 | g.chr1:100964793C>A  | Missense Mutation | CDC14A   | p.A577E  | cell division cycle 14A    | 21 (0.00)  | 30 (0.40) | 1.07 |
| 11-01 | Gp3 | g.chr5:137661531C>T  | Missense Mutation | CDC25C   | p.M144I  | cell division cycle 25C    | 16 (0.00)  | 13 (0.62) | 1.64 |
| 11-01 | Gp3 | g.chr19:10502250C>T  | Missense Mutation | CDC37    | p.D372N  | cell division cycle 37     | 31 (0.00)  | 35 (0.31) | 0.84 |
| 11-01 | Gp3 | g.chr1:227300073C>G  | Missense Mutation | CDC42BPA | p.K647N  | CDC42 binding protein      | 83 (0.00)  | 51 (0.37) | 0.99 |
| 11-01 | Gp3 | g.chr17:38450702C>T  | Missense Mutation | CDC6     | p.P344S  | cell division cycle 6      | 68 (0.00)  | 38 (0.18) | 0.49 |
| 11-01 | Gp3 | g.chr14:105478219G>A | Silent            | CDCA4    | p.D16D   | cell division cycle assoc  | 26 (0.00)  | 34 (0.44) | 1.18 |
| 11-01 | Gp3 | g.chr5:24487817C>A   | Missense Mutation | CDH10    | p.K774N  | cadherin 10, type 2 (T2-44 | 44 (0.00)  | 35 (0.17) | 0.46 |
| 11-01 | Gp3 | g.chr5:24488007C>T   | Missense Mutation | CDH10    | p.R711Q  | cadherin 10, type 2 (T2-43 | 43 (0.00)  | 34 (0.15) | 0.39 |
| 11-01 | Gp3 | g.chr16:64981886C>A  | Nonsense Mutation | CDH11    | p.E671*  | cadherin 11, type 2, OB-93 | 93 (0.00)  | 43 (0.23) | 0.62 |
| 11-01 | Gp3 | g.chr16:64981895C>A  | Missense Mutation | CDH11    | p.G668C  | cadherin 11, type 2, OB-63 | 63 (0.00)  | 33 (0.33) | 0.89 |



|       |     |                      |                   |          |          |                          |               |            |      |
|-------|-----|----------------------|-------------------|----------|----------|--------------------------|---------------|------------|------|
| 11-01 | Gp3 | g.chr18:64239402G>A  | Missense Mutation | CDH19    | p.P14S   | cadherin 19, type 2      | 59 (0.00)     | 36 (0.33)  | 0.89 |
| 11-01 | Gp3 | g.chr10:73330590C>T  | Missense Mutation | CDH23    | p.A228V  | cadherin-related 23      | 101 (0.00)    | 48 (0.15)  | 0.39 |
| 11-01 | Gp3 | g.chr10:73376961G>A  | Splice Site       | CDH23    |          | cadherin-related 23      | 57 (0.00)     | 30 (0.20)  | 0.53 |
| 11-01 | Gp3 | g.chr10:73548736G>T  | Missense Mutation | CDH23    | p.D1959Y | cadherin-related 23      | 60 (0.00)     | 41 (0.37)  | 0.98 |
| 11-01 | Gp3 | g.chr10:73574956C>T  | Missense Mutation | CDH23    | p.T3334I | cadherin-related 23      | 25 (0.00)     | 38 (0.21)  | 0.56 |
| 11-01 | Gp3 | g.chr18:63477053G>A  | Silent            | CDH7     | p.K108K  | cadherin 7, type 2       | 80 (0.00)     | 45 (0.16)  | 0.41 |
| 11-01 | Gp3 | g.chr5:26881394C>A   | Nonsense Mutation | CDH9     | p.E741*  | cadherin 9, type 2 (T1-c | 107 (0.00)    | 80 (0.24)  | 0.63 |
| 11-01 | Gp3 | g.chr10:85970759C>A  | Silent            | CDHR1    | p.L441L  | cadherin-related family  | 102 (0.00)    | 131 (0.26) | 0.69 |
| 11-01 | Gp3 | g.chr7:105645115G>A  | Missense Mutation | CDHR3    | p.C345Y  | cadherin-related family  | 67 (0.00)     | 26 (0.19)  | 0.51 |
| 11-01 | Gp3 | g.chr7:105660890C>T  | Silent            | CDHR3    | p.L575L  | cadherin-related family  | 128 (0.00)    | 65 (0.32)  | 0.86 |
| 11-01 | Gp3 | g.chr7:105662666C>T  | Silent            | CDHR3    | p.T616T  | cadherin-related family  | 164 (0.00)    | 58 (0.21)  | 0.55 |
| 11-01 | Gp3 | g.chr16:4563763G>A   | Missense Mutation | CDIP1    | p.H24Y   | cell death-inducing p53  | 29 (0.00)     | 35 (0.20)  | 0.53 |
| 11-01 | Gp3 | g.chr17:37676248G>A  | Silent            | CDK12    | p.L1001L | cyclin-dependent kinase  | 40 (0.00)     | 15 (0.47)  | 1.24 |
| 11-01 | Gp3 | g.chr7:40134267C>A   | Missense Mutation | CDK13    | p.D1409E | cyclin-dependent kinase  | 38 (0.00)     | 30 (0.17)  | 0.44 |
| 11-01 | Gp3 | g.chr11:67274950C>A  | Missense Mutation | CDK2AP2  | p.A67S   | cyclin-dependent kinase  | 24 (0.00)     | 33 (0.24)  | 0.65 |
| 11-01 | Gp3 | g.chr6:21201372G>A   | Missense Mutation | CDKAL1   | p.G472E  | CDK5 regulatory subun    | 94 (0.00)     | 53 (0.30)  | 0.81 |
| 11-01 | Gp3 | g.chr14:50811772G>A  | Missense Mutation | CDKL1    | p.P100S  | cyclin-dependent kinase  | 36 (0.00)     | 26 (0.23)  | 0.62 |
| 11-01 | Gp3 | g.chr4:184368044C>T  | Nonsense Mutation | CDKN2AIP | p.Q403*  | CDKN2A interacting pr    | 81 (0.01)     | 78 (0.17)  | 0.44 |
| 11-01 | Gp3 | g.chr5:115146982G>T  | Nonsense Mutation | CDO1     | p.C93*   | cysteine dioxygenase     | tyj37 (0.00)  | 23 (0.35)  | 0.93 |
| 11-01 | Gp3 | g.chr11:125885243C>T | Missense Mutation | CDON     | p.G364E  | cell adhesion associat   | 64 (0.00)     | 60 (0.30)  | 0.80 |
| 11-01 | Gp3 | g.chr5:149562343C>A  | Missense Mutation | CDX1     | p.T153N  | caudal type homeobox     | 158 (0.00)    | 34 (0.18)  | 0.47 |
| 11-01 | Gp3 | g.chr19:45026846C>A  | RNA               | CEACAM20 |          | carcinoembryonic anti    | 20 (0.00)     | 22 (0.23)  | 0.61 |
| 11-01 | Gp3 | g.chr19:42219776C>A  | Nonsense Mutation | CEACAM5  | p.S304*  | carcinoembryonic anti    | 38 (0.00)     | 39 (0.21)  | 0.55 |
| 11-01 | Gp3 | g.chr19:42231188C>G  | Silent            | CEACAM5  | p.A686A  | carcinoembryonic anti    | 78 (0.00)     | 42 (0.14)  | 0.38 |
| 11-01 | Gp3 | g.chr19:42231220G>A  | Missense Mutation | CEACAM5  | p.G697E  | carcinoembryonic anti    | 65 (0.00)     | 44 (0.23)  | 0.61 |
| 11-01 | Gp3 | g.chr2:27016091C>G   | Missense Mutation | CENPA    | p.P123A  | centromere protein A     | 55 (0.00)     | 39 (0.26)  | 0.68 |
| 11-01 | Gp3 | g.chrX:100387178G>T  | Splice Site       | CENPI    |          | centromere protein I     | 53 (0.02)     | 33 (0.33)  | 0.56 |
| 11-01 | Gp3 | g.chr13:25486967C>T  | Missense Mutation | CENPJ    | p.S66N   | centromere protein J     | 49 (0.00)     | 21 (0.24)  | 0.63 |
| 11-01 | Gp3 | g.chr16:81050930G>T  | Splice Site       | CENPN    |          | centromere protein N     | 38 (0.00)     | 24 (0.29)  | 0.78 |
| 11-01 | Gp3 | g.chr17:63848034C>T  | Missense Mutation | CEP112   | p.R761K  | centrosomal protein      | 11246 (0.00)  | 22 (0.41)  | 1.09 |
| 11-01 | Gp3 | g.chr15:49044593C>A  | Missense Mutation | CEP152   | p.G1140V | centrosomal protein      | 15271 (0.00)  | 49 (0.16)  | 0.44 |
| 11-01 | Gp3 | g.chr15:49054746C>T  | Missense Mutation | CEP152   | p.D802N  | centrosomal protein      | 15247 (0.02)  | 26 (0.50)  | 1.33 |
| 11-01 | Gp3 | g.chr1:243329226T>C  | Missense Mutation | CEP170   | p.E679G  | centrosomal protein      | 170196 (0.00) | 179 (0.22) | 0.58 |
| 11-01 | Gp3 | g.chr14:105361091C>T | Silent            | CEP170B  | p.L1487L | centrosomal protein      | 17017 (0.00)  | 26 (0.19)  | 0.51 |
| 11-01 | Gp3 | g.chr18:13059218G>T  | Missense Mutation | CEP192   | p.W1465C | centrosomal protein      | 192112 (0.00) | 55 (0.42)  | 1.12 |

|       |     |                     |                   |        |          |                                     |            |      |
|-------|-----|---------------------|-------------------|--------|----------|-------------------------------------|------------|------|
| 11-01 | Gp3 | g.chr18:13068230T>A | Missense Mutation | CEP192 | p.D1584E | centrosomal protein 192 63 (0.00)   | 46 (0.37)  | 0.99 |
| 11-01 | Gp3 | g.chr18:13124664C>A | Missense Mutation | CEP192 | p.F2503L | centrosomal protein 192 39 (0.00)   | 35 (0.23)  | 0.61 |
| 11-01 | Gp3 | g.chr20:34095916G>T | Missense Mutation | CEP250 | p.W2268L | centrosomal protein 250 128 (0.00)  | 76 (0.25)  | 0.67 |
| 11-01 | Gp3 | g.chr1:180064687G>T | Missense Mutation | CEP350 | p.Q2847H | centrosomal protein 350 54 (0.00)   | 29 (0.21)  | 0.55 |
| 11-01 | Gp3 | g.chr1:180064723C>A | Silent            | CEP350 | p.L2859L | centrosomal protein 350 57 (0.00)   | 27 (0.19)  | 0.49 |
| 11-01 | Gp3 | g.chr1:26581800C>A  | Missense Mutation | CEP85  | p.S116Y  | centrosomal protein 85k 59 (0.02)   | 32 (0.31)  | 0.83 |
| 11-01 | Gp3 | g.chr1:26581801T>A  | Silent            | CEP85  | p.S116S  | centrosomal protein 85k 59 (0.00)   | 32 (0.31)  | 0.83 |
| 11-01 | Gp3 | g.chr3:101451367G>A | Silent            | CEP97  | p.Q199Q  | centrosomal protein 97k 28 (0.00)   | 17 (0.59)  | 1.57 |
| 11-01 | Gp3 | g.chr3:101477067G>C | Missense Mutation | CEP97  | p.M480I  | centrosomal protein 97k 27 (0.00)   | 16 (0.38)  | 1.00 |
| 11-01 | Gp3 | g.chr22:47116799C>T | Splice Site       | CERK   | p.V86I   | ceramide kinase 57 (0.00)           | 25 (0.20)  | 0.53 |
| 11-01 | Gp3 | g.chr1:196796101G>T | Silent            | CFHR1  | p.R132R  | complement factor H-re 123 (0.00)   | 118 (0.15) | 0.41 |
| 11-01 | Gp3 | g.chr4:110670441T>A | Missense Mutation | CFI    | p.S369C  | complement factor I 115 (0.01)      | 129 (0.30) | 0.81 |
| 11-01 | Gp3 | g.chr7:117171127A>G | Missense Mutation | CFTR   | p.M150V  | cystic fibrosis transmem 57 (0.00)  | 35 (0.23)  | 0.61 |
| 11-01 | Gp3 | g.chr15:57835915C>A | Missense Mutation | CGNL1  | p.L1105I | cingulin-like 1 59 (0.00)           | 65 (0.17)  | 0.45 |
| 11-01 | Gp3 | g.chr2:27324720C>T  | Missense Mutation | CGREF1 | p.D127N  | cell growth regulator wi 35 (0.00)  | 23 (0.35)  | 0.93 |
| 11-01 | Gp3 | g.chr14:55005096C>T | Missense Mutation | CGRRF1 | p.L332F  | cell growth regulator wi 24 (0.00)  | 35 (0.20)  | 0.53 |
| 11-01 | Gp3 | g.chr7:132659989G>A | Silent            | CHCHD3 | p.T103T  | coiled-coil-helix-coiled- 52 (0.00) | 54 (0.20)  | 0.54 |
| 11-01 | Gp3 | g.chr3:14157944C>T  | Missense Mutation | CHCHD4 | p.D35N   | coiled-coil-helix-coiled- 59 (0.00) | 34 (0.29)  | 0.78 |
| 11-01 | Gp3 | g.chr5:98205314G>C  | Intron            | CHD1   |          | chromodomain helicase 145 (0.00)    | 96 (0.18)  | 0.47 |
| 11-01 | Gp3 | g.chr5:98226816C>A  | Intron            | CHD1   |          | chromodomain helicase 18 (0.00)     | 14 (0.36)  | 0.95 |
| 11-01 | Gp3 | g.chr1:146763196G>A | Missense Mutation | CHD1L  | p.V785I  | chromodomain helicase 32 (0.00)     | 15 (0.33)  | 0.89 |
| 11-01 | Gp3 | g.chr15:93467644G>A | Silent            | CHD2   | p.E52E   | chromodomain helicase 37 (0.00)     | 20 (0.25)  | 0.67 |
| 11-01 | Gp3 | g.chr15:93510722C>T | Missense Mutation | CHD2   | p.A723V  | chromodomain helicase 62 (0.00)     | 40 (0.30)  | 0.80 |
| 11-01 | Gp3 | g.chr15:93522437G>A | Missense Mutation | CHD2   | p.V934I  | chromodomain helicase 38 (0.03)     | 27 (0.52)  | 1.38 |
| 11-01 | Gp3 | g.chr12:6707165C>G  | Missense Mutation | CHD4   | p.R593P  | chromodomain helicase 126 (0.00)    | 74 (0.20)  | 0.54 |
| 11-01 | Gp3 | g.chr1:6175375A>G   | Intron            | CHD5   |          | chromodomain helicase 21 (0.00)     | 19 (0.47)  | 1.26 |
| 11-01 | Gp3 | g.chr1:6186354C>G   | Intron            | CHD5   |          | chromodomain helicase 32 (0.03)     | 68 (0.15)  | 0.39 |
| 11-01 | Gp3 | g.chr1:6186390C>G   | Intron            | CHD5   |          | chromodomain helicase 31 (0.00)     | 59 (0.17)  | 0.45 |
| 11-01 | Gp3 | g.chr1:6235733C>A   | Intron            | CHD5   |          | chromodomain helicase 69 (0.00)     | 35 (0.17)  | 0.46 |
| 11-01 | Gp3 | g.chr20:40102131C>A | Missense Mutation | CHD6   | p.R832L  | chromodomain helicase 29 (0.00)     | 32 (0.28)  | 0.75 |
| 11-01 | Gp3 | g.chr8:61734614C>T  | Missense Mutation | CHD7   | p.S956L  | chromodomain helicase 59 (0.02)     | 30 (0.23)  | 0.62 |
| 11-01 | Gp3 | g.chr8:61764639G>C  | Silent            | CHD7   | p.L1909L | chromodomain helicase 84 (0.00)     | 46 (0.20)  | 0.52 |
| 11-01 | Gp3 | g.chr8:61765656C>G  | Missense Mutation | CHD7   | p.F2124L | chromodomain helicase 129 (0.00)    | 48 (0.35)  | 0.94 |
| 11-01 | Gp3 | g.chr14:21860964C>T | Missense Mutation | CHD8   | p.R2158H | chromodomain helicase 55 (0.02)     | 47 (0.19)  | 0.51 |
| 11-01 | Gp3 | g.chr14:21884039G>A | Nonsense Mutation | CHD8   | p.R582*  | chromodomain helicase 54 (0.00)     | 40 (0.75)  | 2.00 |

|       |     |                      |                   |         |         |                               |            |            |      |
|-------|-----|----------------------|-------------------|---------|---------|-------------------------------|------------|------------|------|
| 11-01 | Gp3 | g.chr1:111777579C>A  | Missense Mutation | CHI3L2  | p.S127Y | chitinase 3-like 2            | 31 (0.00)  | 30 (0.17)  | 0.44 |
| 11-01 | Gp3 | g.chr1:203192776C>A  | Missense Mutation | CHIT1   | p.M109I | chitinase 1 (chitotriosidase) | 51 (0.00)  | 29 (0.24)  | 0.64 |
| 11-01 | Gp3 | g.chr1:241797990G>C  | Missense Mutation | CHML    | p.T360S | choroideremia-like (Rab)      | 61 (0.00)  | 27 (0.19)  | 0.49 |
| 11-01 | Gp3 | g.chr2:86734627G>A   | Silent            | CHMP3   | p.D166D | charged multivesicular l      | 201 (0.00) | 200 (0.23) | 0.63 |
| 11-01 | Gp3 | g.chr2:86737506C>T   | Missense Mutation | CHMP3   | p.R128K | charged multivesicular l      | 60 (0.00)  | 36 (0.17)  | 0.44 |
| 11-01 | Gp3 | g.chr9:33270684C>T   | Silent            | CHMP5   | p.T95T  | charged multivesicular l      | 60 (0.00)  | 53 (0.15)  | 0.40 |
| 11-01 | Gp3 | g.chrX:109937439C>A  | Nonsense Mutation | CHRDL1  | p.G244* | chordin-like 1                | 34 (0.00)  | 34 (0.24)  | 0.39 |
| 11-01 | Gp3 | g.chr15:34355527C>G  | Nonsense Mutation | CHRM5   | p.Y203* | cholinergic receptor, mu      | 212 (0.00) | 152 (0.14) | 0.39 |
| 11-01 | Gp3 | g.chr2:175624242G>T  | Missense Mutation | CHRNA1  | p.L55M  | cholinergic receptor, nic     | 45 (0.00)  | 16 (0.38)  | 1.00 |
| 11-01 | Gp3 | g.chr15:78885499C>A  | Missense Mutation | CHRNA3  | p.R475L | cholinergic receptor, nic     | 27 (0.00)  | 44 (0.16)  | 0.42 |
| 11-01 | Gp3 | g.chr20:61982280G>A  | Silent            | CHRNA4  | p.C161C | cholinergic receptor, nic     | 28 (0.00)  | 24 (0.21)  | 0.56 |
| 11-01 | Gp3 | g.chr4:40351257G>A   | Missense Mutation | CHRNA9  | p.V242I | cholinergic receptor, nic     | 46 (0.00)  | 32 (0.16)  | 0.42 |
| 11-01 | Gp3 | g.chr4:40351271C>A   | Silent            | CHRNA9  | p.I246I | cholinergic receptor, nic     | 47 (0.00)  | 38 (0.29)  | 0.77 |
| 11-01 | Gp3 | g.chr17:7350464C>G   | Missense Mutation | CHRNB1  | p.S80R  | cholinergic receptor, nic     | 15 (0.00)  | 19 (0.37)  | 0.98 |
| 11-01 | Gp3 | g.chr2:233404511G>T  | Splice Site       | CHRNG   | p.L18L  | cholinergic receptor, nic     | 18 (0.00)  | 35 (0.29)  | 0.76 |
| 11-01 | Gp3 | g.chr2:233407749C>G  | Silent            | CHRNG   | p.L254L | cholinergic receptor, nic     | 117 (0.00) | 87 (0.16)  | 0.43 |
| 11-01 | Gp3 | g.chr11:45671739C>A  | Missense Mutation | CHST1   | p.E245D | carbohydrate (keratan st)     | 20 (0.00)  | 19 (0.32)  | 0.84 |
| 11-01 | Gp3 | g.chr3:142840889C>A  | Missense Mutation | CHST2   | p.Q411K | carbohydrate (N-acetylgl)     | 29 (0.00)  | 25 (0.24)  | 0.64 |
| 11-01 | Gp3 | g.chr18:24497140C>T  | Missense Mutation | CHST9   | p.A139T | carbohydrate (N-acetylgl)     | 84 (0.00)  | 29 (0.21)  | 0.55 |
| 11-01 | Gp3 | g.chr12:120295413C>T | Missense Mutation | CIT     | p.E110K | citron rho-interacting se     | 161 (0.00) | 130 (0.18) | 0.47 |
| 11-01 | Gp3 | g.chr2:113513937G>A  | Silent            | CKAP2L  | p.P337P | cytoskeleton associated       | 62 (0.00)  | 48 (0.27)  | 0.72 |
| 11-01 | Gp3 | g.chr2:122283460C>A  | Silent            | CLASP1  | p.V169V | cytoplasmic linker assoc      | 38 (0.00)  | 24 (0.21)  | 0.56 |
| 11-01 | Gp3 | g.chr2:122286312C>A  | Missense Mutation | CLASP1  | p.V107L | cytoplasmic linker assoc      | 84 (0.00)  | 66 (0.26)  | 0.69 |
| 11-01 | Gp3 | g.chr3:33661229G>A   | Splice Site       | CLASP2  | p.H396Y | cytoplasmic linker assoc      | 28 (0.00)  | 16 (0.38)  | 1.00 |
| 11-01 | Gp3 | g.chr19:40225108A>G  | Missense Mutation | CLC     | p.F40L  | Charcot-Leyden crystal        | 37 (0.00)  | 25 (0.72)  | 1.92 |
| 11-01 | Gp3 | g.chr1:86904648C>T   | Silent            | CLCA2   | p.F354F | chloride channel accesso      | 54 (0.00)  | 41 (0.37)  | 0.98 |
| 11-01 | Gp3 | g.chr1:87038398C>A   | Missense Mutation | CLCA4   | p.L488I | chloride channel accesso      | 56 (0.00)  | 22 (0.23)  | 0.61 |
| 11-01 | Gp3 | g.chr4:170628237G>A  | Missense Mutation | CLCN3   | p.V657I | chloride channel, voltag      | 70 (0.00)  | 33 (0.21)  | 0.57 |
| 11-01 | Gp3 | g.chr1:11886239C>A   | Silent            | CLCN6   | p.I225I | chloride channel, voltag      | 34 (0.00)  | 20 (0.30)  | 0.80 |
| 11-01 | Gp3 | g.chr3:190026195C>T  | Nonsense Mutation | CLDN1   | p.W169* | claudin 1                     | 16 (0.00)  | 16 (0.31)  | 0.83 |
| 11-01 | Gp3 | g.chr13:96212430C>A  | Missense Mutation | CLDN10  | p.L89M  | claudin 10                    | 42 (0.00)  | 39 (0.18)  | 0.48 |
| 11-01 | Gp3 | g.chr16:11071124C>T  | Silent            | CLEC16A | p.H257H | C-type lectin domain fa       | 30 (0.00)  | 21 (0.24)  | 0.63 |
| 11-01 | Gp3 | g.chr7:139226835C>G  | Missense Mutation | CLEC2L  | p.H167Q | C-type lectin domain fa       | 31 (0.00)  | 27 (0.22)  | 0.59 |
| 11-01 | Gp3 | g.chr12:8278257C>A   | Missense Mutation | CLEC4A  | p.F61L  | C-type lectin domain fa       | 45 (0.00)  | 39 (0.21)  | 0.55 |
| 11-01 | Gp3 | g.chr12:122826206C>T | Silent            | CLIP1   | p.L515L | CAP-GLY domain cont:          | 67 (0.00)  | 33 (0.21)  | 0.57 |

|       |     |                      |                   |          |          |                                      |            |      |
|-------|-----|----------------------|-------------------|----------|----------|--------------------------------------|------------|------|
| 11-01 | Gp3 | g.chr7:73814719C>T   | Missense Mutation | CLIP2    | p.S967L  | CAP-GLY domain cont:67 (0.00)        | 122 (0.15) | 0.39 |
| 11-01 | Gp3 | g.chr14:95677128C>A  | Missense Mutation | CLMN     | p.V233L  | calmin (calponin-like, tr45 (0.00)   | 39 (0.23)  | 0.62 |
| 11-01 | Gp3 | g.chr11:57428845C>A  | Silent            | CLP1     | p.A341A  | cleavage and polyadeny 36 (0.00)     | 34 (0.38)  | 1.02 |
| 11-01 | Gp3 | g.chr15:65445948C>A  | Missense Mutation | CLPX     | p.L547F  | caseinolytic mitochondr 84 (0.00)    | 69 (0.14)  | 0.39 |
| 11-01 | Gp3 | g.chr1:36203009C>A   | Missense Mutation | CLSPN    | p.M1226I | claspin 72 (0.00)                    | 34 (0.15)  | 0.39 |
| 11-01 | Gp3 | g.chr17:57760456G>A  | Splice Site       | CLTC     | p.D1292N | clathrin, heavy chain (H 98 (0.00)   | 88 (0.16)  | 0.42 |
| 11-01 | Gp3 | g.chr22:19175514C>G  | Silent            | CLTCL1   | p.L1471L | clathrin, heavy chain-lik 37 (0.00)  | 22 (0.41)  | 1.09 |
| 11-01 | Gp3 | g.chr22:19183825G>C  | Missense Mutation | CLTCL1   | p.H1381Q | clathrin, heavy chain-lik 90 (0.00)  | 65 (0.29)  | 0.78 |
| 11-01 | Gp3 | g.chr18:618053G>C    | Missense Mutation | CLUL1    | p.S43T   | clusterin-like 1 (retinal) 92 (0.00) | 49 (0.16)  | 0.44 |
| 11-01 | Gp3 | g.chr6:25093936G>T   | RNA               | CMAHP    |          | cytidine monophospho-l 102 (0.00)    | 36 (0.31)  | 0.81 |
| 11-01 | Gp3 | g.chr2:7001437C>T    | Silent            | CMPK2    | p.Q290Q  | cytidine monophosphate 36 (0.00)     | 17 (0.35)  | 0.94 |
| 11-01 | Gp3 | g.chr14:23847651C>T  | Missense Mutation | CMTM5    | p.L74F   | CKLF-like MARVEL tr22 (0.00)         | 25 (0.36)  | 0.96 |
| 11-01 | Gp3 | g.chr6:37446206G>C   | Missense Mutation | CMTR1    | p.K725N  | cap methyltransferase 1 97 (0.00)    | 36 (0.17)  | 0.44 |
| 11-01 | Gp3 | g.chr5:79048582C>A   | Nonsense Mutation | CMYA5    | p.S3692* | cardiomyopathy associa 100 (0.00)    | 26 (0.19)  | 0.51 |
| 11-01 | Gp3 | g.chrX:150912804C>G  | Missense Mutation | CNGA2    | p.T610S  | cyclic nucleotide gated c55 (0.00)   | 32 (0.28)  | 0.47 |
| 11-01 | Gp3 | g.chr2:99012317G>A   | Silent            | CNGA3    | p.E232E  | cyclic nucleotide gated c116 (0.00)  | 90 (0.21)  | 0.56 |
| 11-01 | Gp3 | g.chr16:57953128G>A  | Missense Mutation | CNGB1    | p.P611L  | cyclic nucleotide gated c44 (0.00)   | 31 (0.32)  | 0.86 |
| 11-01 | Gp3 | g.chr8:87588130C>T   | Missense Mutation | CNGB3    | p.G778R  | cyclic nucleotide gated c102 (0.00)  | 91 (0.16)  | 0.55 |
| 11-01 | Gp3 | g.chr8:87638241G>T   | Missense Mutation | CNGB3    | p.F516L  | cyclic nucleotide gated c42 (0.00)   | 45 (0.20)  | 0.67 |
| 11-01 | Gp3 | g.chrX:21444682G>T   | Silent            | CNKSR2   | p.L44L   | connector enhancer of k 24 (0.00)    | 16 (0.38)  | 0.62 |
| 11-01 | Gp3 | g.chr1:95367284G>A   | Nonsense Mutation | CNN3     | p.Q148*  | calponin 3, acidic 22 (0.00)         | 14 (0.36)  | 0.95 |
| 11-01 | Gp3 | g.chr10:101120600C>A | Silent            | CNNM1    | p.R576R  | cyclin and CBS domain 101 (0.00)     | 56 (0.20)  | 0.52 |
| 11-01 | Gp3 | g.chr10:101122009C>A | Nonsense Mutation | CNNM1    | p.Y628*  | cyclin and CBS domain 88 (0.00)      | 32 (0.19)  | 0.50 |
| 11-01 | Gp3 | g.chr2:97463272G>A   | Silent            | CNNM4    | p.R523R  | cyclin and CBS domain 25 (0.00)      | 40 (0.15)  | 0.40 |
| 11-01 | Gp3 | g.chr5:154242887G>A  | Missense Mutation | CNOT8    | p.A17T   | CCR4-NOT transcriptio 114 (0.00)     | 77 (0.22)  | 0.59 |
| 11-01 | Gp3 | g.chr1:205034367G>T  | Missense Mutation | CNTN2    | p.G558W  | contactin 2 (axonal) 15 (0.00)       | 11 (0.73)  | 1.94 |
| 11-01 | Gp3 | g.chr3:74316479C>T   | Missense Mutation | CNTN3    | p.V919M  | contactin 3 (plasmacyto 86 (0.01)    | 58 (0.17)  | 0.46 |
| 11-01 | Gp3 | g.chr3:74334540C>A   | Missense Mutation | CNTN3    | p.A874S  | contactin 3 (plasmacyto 103 (0.00)   | 57 (0.19)  | 0.51 |
| 11-01 | Gp3 | g.chr3:2861217C>A    | Silent            | CNTN4    | p.R136R  | contactin 4 72 (0.00)                | 45 (0.27)  | 0.71 |
| 11-01 | Gp3 | g.chr3:3078963G>A    | Silent            | CNTN4    | p.G681G  | contactin 4 92 (0.00)                | 27 (0.22)  | 0.59 |
| 11-01 | Gp3 | g.chr7:146818174G>C  | Silent            | CNTNAP2  | p.R286R  | contactin associated pro 74 (0.00)   | 58 (0.33)  | 0.87 |
| 11-01 | Gp3 | g.chr7:147336208G>A  | Silent            | CNTNAP2  | p.V636V  | contactin associated pro 110 (0.00)  | 44 (0.20)  | 0.55 |
| 11-01 | Gp3 | g.chr9:43737500C>T   | Missense Mutation | CNTNAP3B | p.R124C  | contactin associated pro 180 (0.01)  | 210 (0.16) | 0.42 |
| 11-01 | Gp3 | g.chr2:124999946G>A  | Silent            | CNTNAP5  | p.Q119Q  | contactin associated pro 97 (0.01)   | 55 (0.16)  | 0.44 |
| 11-01 | Gp3 | g.chr2:124999961C>A  | Missense Mutation | CNTNAP5  | p.D124E  | contactin associated pro 41 (0.00)   | 17 (0.53)  | 1.41 |

|       |     |                      |                   |          |          |                            |            |            |      |
|-------|-----|----------------------|-------------------|----------|----------|----------------------------|------------|------------|------|
| 11-01 | Gp3 | g.chr9:123921226G>A  | Missense Mutation | CNTRL    | p.A1620T | centriolin                 | 89 (0.00)  | 56 (0.39)  | 1.05 |
| 11-01 | Gp3 | g.chr17:7840021C>A   | Silent            | CNTROB   | p.T238T  | centrobin, centrosomal I63 | (0.00)     | 77 (0.17)  | 0.45 |
| 11-01 | Gp3 | g.chr7:51095855G>A   | Nonsense Mutation | COBL     | p.Q980*  | cordon-bleu WH2 repea      | 45 (0.00)  | 37 (0.16)  | 0.43 |
| 11-01 | Gp3 | g.chr7:51096199C>A   | Missense Mutation | COBL     | p.S865I  | cordon-bleu WH2 repea      | 31 (0.00)  | 17 (0.82)  | 2.20 |
| 11-01 | Gp3 | g.chr7:51098596C>T   | Missense Mutation | COBL     | p.A473T  | cordon-bleu WH2 repea      | 65 (0.00)  | 41 (0.24)  | 0.65 |
| 11-01 | Gp3 | g.chr2:165578661G>A  | Missense Mutation | COBLL1   | p.P307L  | cordon-bleu WH2 repea      | 24 (0.00)  | 14 (0.43)  | 1.14 |
| 11-01 | Gp3 | g.chr1:230814681T>C  | Missense Mutation | COG2     | p.F350S  | component of oligomeri     | 64 (0.00)  | 26 (0.27)  | 0.56 |
| 11-01 | Gp3 | g.chr1:230827230G>A  | Missense Mutation | COG2     | p.V679I  | component of oligomeri     | 99 (0.00)  | 36 (0.25)  | 0.52 |
| 11-01 | Gp3 | g.chr16:70531264C>A  | Missense Mutation | COG4     | p.K447N  | component of oligomeri     | 111 (0.00) | 127 (0.36) | 0.97 |
| 11-01 | Gp3 | g.chr13:40301647G>C  | Missense Mutation | COG6     | p.L596F  | component of oligomeri     | 77 (0.00)  | 76 (0.17)  | 0.46 |
| 11-01 | Gp3 | g.chr9:101831985C>G  | Missense Mutation | COL15A1  | p.S1328R | collagen, type XV, alp     | 56 (0.00)  | 28 (0.71)  | 1.90 |
| 11-01 | Gp3 | g.chr10:105833004C>T | Splice Site       | COL17A1  |          | collagen, type XVII, alp   | 126 (0.00) | 84 (0.19)  | 0.51 |
| 11-01 | Gp3 | g.chr6:55922502T>A   | Missense Mutation | COL21A1  | p.S943C  | collagen, type XXI, alp    | 23 (0.00)  | 18 (0.50)  | 1.33 |
| 11-01 | Gp3 | g.chr1:86340349C>T   | Missense Mutation | COL24A1  | p.G1041R | collagen, type XXIV, al    | 32 (0.00)  | 25 (0.24)  | 0.64 |
| 11-01 | Gp3 | g.chr1:86437030C>A   | Missense Mutation | COL24A1  | p.G804V  | collagen, type XXIV, al    | 17 (0.00)  | 18 (0.39)  | 1.04 |
| 11-01 | Gp3 | g.chr4:109820327C>A  | Nonsense Mutation | COL25A1  | p.G282*  | collagen, type XXV, alp    | 33 (0.00)  | 29 (0.28)  | 0.74 |
| 11-01 | Gp3 | g.chr9:116931134C>T  | Silent            | COL27A1  | p.P433P  | collagen, type XXVII, a    | 95 (0.00)  | 155 (0.19) | 0.52 |
| 11-01 | Gp3 | g.chr9:116956683G>A  | Splice Site       | COL27A1  |          | collagen, type XXVII, a    | 47 (0.00)  | 37 (0.16)  | 0.43 |
| 11-01 | Gp3 | g.chr9:117002507C>A  | Missense Mutation | COL27A1  | p.P912Q  | collagen, type XXVII, a    | 26 (0.00)  | 23 (0.26)  | 0.70 |
| 11-01 | Gp3 | g.chr9:117072877G>C  | Missense Mutation | COL27A1  | p.D1829H | collagen, type XXVII, a    | 97 (0.00)  | 52 (0.21)  | 0.56 |
| 11-01 | Gp3 | g.chr7:7421216C>T    | Missense Mutation | COL28A1  | p.G722S  | collagen, type XXVIII, :   | 70 (0.00)  | 60 (0.20)  | 0.53 |
| 11-01 | Gp3 | g.chr12:48387801G>A  | Silent            | COL2A1   | p.G282G  | collagen, type II, alpha   | 180 (0.00) | 55 (0.22)  | 0.58 |
| 11-01 | Gp3 | g.chr2:228131774C>T  | Missense Mutation | COL4A3   | p.P492S  | collagen, type IV, alpha   | 26 (0.00)  | 18 (0.28)  | 0.74 |
| 11-01 | Gp3 | g.chr2:227895216G>A  | Missense Mutation | COL4A4   | p.P1306S | collagen, type IV, alpha   | 22 (0.00)  | 31 (0.26)  | 0.69 |
| 11-01 | Gp3 | g.chr2:227924185C>A  | Missense Mutation | COL4A4   | p.R773S  | collagen, type IV, alpha   | 63 (0.00)  | 29 (0.41)  | 1.10 |
| 11-01 | Gp3 | g.chr2:227953503C>A  | Nonsense Mutation | COL4A4   | p.G497*  | collagen, type IV, alpha   | 21 (0.00)  | 18 (0.28)  | 0.74 |
| 11-01 | Gp3 | g.chr9:137619165C>T  | Silent            | COL5A1   | p.Y236Y  | collagen, type V, alpha    | 61 (0.02)  | 59 (0.15)  | 0.41 |
| 11-01 | Gp3 | g.chr19:10087929C>G  | Silent            | COL5A3   | p.G1088G | collagen, type V, alpha    | 38 (0.00)  | 16 (0.31)  | 0.83 |
| 11-01 | Gp3 | g.chr2:238274467G>A  | Silent            | COL6A3   | p.D1904D | collagen, type VI, alpha   | 21 (0.00)  | 35 (0.40)  | 1.07 |
| 11-01 | Gp3 | g.chr3:130292975G>T  | Missense Mutation | COL6A6   | p.E1051D | collagen, type VI, alpha   | 110 (0.00) | 62 (0.39)  | 1.03 |
| 11-01 | Gp3 | g.chr3:130345357G>A  | Missense Mutation | COL6A6   | p.G1636E | collagen, type VI, alpha   | 80 (0.00)  | 86 (0.48)  | 1.27 |
| 11-01 | Gp3 | g.chr1:183938450C>G  | Missense Mutation | COLGALT2 | p.W262S  | collagen beta(1-O)galac    | 73 (0.00)  | 52 (0.15)  | 0.41 |
| 11-01 | Gp3 | g.chr3:15507887G>T   | Missense Mutation | COLQ     | p.Q259K  | collagen-like tail subuni  | 63 (0.00)  | 42 (0.14)  | 0.38 |
| 11-01 | Gp3 | g.chr11:36300113G>T  | Silent            | COMMD9   | p.S35S   | COMM domain contain        | 68 (0.00)  | 28 (0.18)  | 0.48 |
| 11-01 | Gp3 | g.chr1:160262331G>A  | Missense Mutation | COPA     | p.T968I  | coatomer protein compl     | 44 (0.00)  | 28 (0.21)  | 0.57 |

|       |     |                      |                   |           |          |                          |              |           |      |
|-------|-----|----------------------|-------------------|-----------|----------|--------------------------|--------------|-----------|------|
| 11-01 | Gp3 | g.chr1:160278907G>A  | Silent            | COPA      | p.D401D  | coatomer protein compl   | 21 (0.00)    | 46 (0.46) | 1.22 |
| 11-01 | Gp3 | g.chr11:14501150C>A  | Missense Mutation | COPB1     | p.K441N  | coatomer protein compl   | 74 (0.00)    | 40 (0.15) | 0.40 |
| 11-01 | Gp3 | g.chr3:139077930G>T  | Missense Mutation | COPB2     | p.F798L  | coatomer protein compl   | 75 (0.01)    | 23 (0.22) | 0.58 |
| 11-01 | Gp3 | g.chr3:128976576C>A  | Missense Mutation | COPG1     | p.D248E  | coatomer protein compl   | 224 (0.00)   | 97 (0.20) | 0.52 |
| 11-01 | Gp3 | g.chr7:99688883G>A   | Silent            | COPS6     | p.Q224Q  | COP9 signalosome subu    | 70 (0.00)    | 38 (0.29) | 0.77 |
| 11-01 | Gp3 | g.chr12:109041269T>A | Missense Mutation | CORO1C    | p.L445F  | coronin, actin binding p | 39 (0.00)    | 40 (0.17) | 0.47 |
| 11-01 | Gp3 | g.chr16:85834879C>A  | Missense Mutation | COX4I1    | p.A23D   | cytochrome c oxidase st  | 54 (0.00)    | 10 (0.60) | 1.27 |
| 11-01 | Gp3 | g.chr16:85839458C>A  | Missense Mutation | COX4I1    | p.Q121K  | cytochrome c oxidase st  | 21 (0.00)    | 16 (0.38) | 0.79 |
| 11-01 | Gp3 | g.chr7:129951900C>T  | Missense Mutation | CPA4      | p.A339V  | carboxypeptidase A4      | 38 (0.00)    | 48 (0.31) | 0.83 |
| 11-01 | Gp3 | g.chr7:129962438C>T  | Silent            | CPA4      | p.N396N  | carboxypeptidase A4      | 97 (0.00)    | 58 (0.16) | 0.41 |
| 11-01 | Gp3 | g.chr17:28782378C>T  | Missense Mutation | CPD       | p.T1076I | carboxypeptidase D       | 77 (0.00)    | 27 (0.19) | 0.49 |
| 11-01 | Gp3 | g.chr4:166414409C>T  | Silent            | CPE       | p.H400H  | carboxypeptidase E       | 63 (0.02)    | 42 (0.19) | 0.51 |
| 11-01 | Gp3 | g.chr5:173317310C>T  | Nonsense Mutation | CPEB4     | p.Q192*  | cytoplasmic polyadenyl   | 94 (0.00)    | 60 (0.23) | 0.62 |
| 11-01 | Gp3 | g.chr7:120764427C>T  | Nonsense Mutation | CPED1     | p.Q321*  | cadherin-like and PC-es  | 59 (0.00)    | 20 (0.25) | 0.67 |
| 11-01 | Gp3 | g.chr3:131283194C>A  | Splice Site       | CPNE4     |          | copine IV                | 24 (0.00)    | 13 (0.62) | 1.64 |
| 11-01 | Gp3 | g.chr3:9768853G>A    | Missense Mutation | CPNE9     | p.E487K  | copine family member I   | 104 (0.00)   | 59 (0.25) | 0.68 |
| 11-01 | Gp3 | g.chr2:207833941G>T  | Silent            | CPO       | p.G302G  | carboxypeptidase O       | 88 (0.00)    | 58 (0.17) | 0.46 |
| 11-01 | Gp3 | g.chr8:97847274G>A   | Silent            | CPQ       | p.K169K  | carboxypeptidase Q       | 45 (0.00)    | 73 (0.15) | 0.50 |
| 11-01 | Gp3 | g.chr1:207758101C>T  | Missense Mutation | CR1       | p.P1804S | complement component     | 74 (0.00)    | 45 (0.22) | 0.59 |
| 11-01 | Gp3 | g.chr1:207641919C>T  | Missense Mutation | CR2       | p.H165Y  | complement component     | 66 (0.00)    | 31 (0.19) | 0.52 |
| 11-01 | Gp3 | g.chr16:1709991C>T   | Silent            | CRAMP1L   | p.P780P  | Crm, cramped-like (Dro   | 18 (0.00)    | 23 (0.26) | 0.70 |
| 11-01 | Gp3 | g.chr1:197297729C>T  | Missense Mutation | CRB1      | p.A83V   | crumbs family member     | 35 (0.00)    | 15 (0.33) | 0.89 |
| 11-01 | Gp3 | g.chr1:197446835C>G  | Silent            | CRB1      | p.G1237G | crumbs family member     | 41 (0.00)    | 21 (0.52) | 1.40 |
| 11-01 | Gp3 | g.chr2:208434980C>G  | Nonsense Mutation | CREB1     | p.S147*  | cAMP responsive eleme    | 86 (0.00)    | 21 (0.24) | 0.63 |
| 11-01 | Gp3 | g.chr16:3830801G>A   | Silent            | CREBBP    | p.S585S  | CREB binding protein     | 35 (0.00)    | 33 (0.27) | 0.73 |
| 11-01 | Gp3 | g.chr7:30706898C>A   | Silent            | CRHR2     | p.G87G   | corticotropin releasing  | h24 (0.00)   | 28 (0.21) | 0.57 |
| 11-01 | Gp3 | g.chr6:49704148G>A   | Silent            | CRISP3    | p.L62L   | cysteine-rich secretory  | p 64 (0.00)  | 38 (0.24) | 0.63 |
| 11-01 | Gp3 | g.chr17:29119518G>A  | Missense Mutation | CRLF3     | p.S300L  | cytokine receptor-like   | fz 78 (0.00) | 46 (0.15) | 0.41 |
| 11-01 | Gp3 | g.chr3:97596740G>A   | Silent            | CRYBG3    | p.K286K  | beta-gamma crystallin    | d 17 (0.00)  | 13 (0.69) | 1.85 |
| 11-01 | Gp3 | g.chr2:209007394C>T  | Missense Mutation | CRYGB     | p.G166S  | crystallin, gamma B      | 43 (0.00)    | 34 (0.24) | 0.63 |
| 11-01 | Gp3 | g.chr2:209010671G>A  | Nonsense Mutation | CRYGB     | p.Q27*   | crystallin, gamma B      | 37 (0.00)    | 29 (0.24) | 0.64 |
| 11-01 | Gp3 | g.chr13:20978847C>A  | Missense Mutation | CRYL1     | p.G258V  | crystallin, lambda 1     | 91 (0.00)    | 47 (0.23) | 0.62 |
| 11-01 | Gp3 | g.chr1:110466301C>G  | Nonsense Mutation | CSF1      | p.S353*  | colony stimulating facto | 90 (0.00)    | 70 (0.16) | 0.42 |
| 11-01 | Gp3 | g.chr22:37334401C>G  | Missense Mutation | CSF2RB    | p.L851V  | colony stimulating facto | 45 (0.00)    | 84 (0.15) | 0.41 |
| 11-01 | Gp3 | g.chr10:43659488G>A  | Silent            | CSGALNACT | p.E385E  | chondroitin sulfate N-ac | 67 (0.00)    | 52 (0.23) | 0.62 |

|       |     |                      |                   |               |          |                            |            |            |      |
|-------|-----|----------------------|-------------------|---------------|----------|----------------------------|------------|------------|------|
| 11-01 | Gp3 | g.chr8:2818715G>T    | Missense Mutation | CSMD1         | p.P3218Q | CUB and Sushi multiple     | 69 (0.00)  | 18 (0.28)  | 0.41 |
| 11-01 | Gp3 | g.chr1:34003114G>T   | Missense Mutation | CSMD2         | p.P3243T | CUB and Sushi multiple     | 31 (0.00)  | 26 (0.19)  | 0.51 |
| 11-01 | Gp3 | g.chr1:34090173G>A   | Silent            | CSMD2         | p.L730L  | CUB and Sushi multiple     | 20 (0.00)  | 47 (0.15)  | 0.40 |
| 11-01 | Gp3 | g.chr8:113332153G>A  | Missense Mutation | CSMD3         | p.T2408M | CUB and Sushi multiple     | 68 (0.01)  | 17 (0.47)  | 1.25 |
| 11-01 | Gp3 | g.chr8:113518976G>A  | Silent            | CSMD3         | p.D1613D | CUB and Sushi multiple     | 71 (0.00)  | 34 (0.15)  | 0.39 |
| 11-01 | Gp3 | g.chr4:70810573C>T   | Silent            | CSN1S1        | p.F136F  | casein alpha s1            | 144 (0.00) | 117 (0.32) | 0.84 |
| 11-01 | Gp3 | g.chr12:51458038G>A  | Missense Mutation | CSRNP2        | p.L375F  | cysteine-serine-rich nuc   | 53 (0.00)  | 23 (0.26)  | 0.70 |
| 11-01 | Gp3 | g.chr2:166532891G>A  | Missense Mutation | CSRNP3        | p.D192N  | cysteine-serine-rich nuc   | 188 (0.00) | 96 (0.27)  | 0.72 |
| 11-01 | Gp3 | g.chr3:122060367G>T  | Nonsense Mutation | CSTA          | p.G84*   | cystatin A (stefin A)      | 40 (0.00)  | 34 (0.15)  | 0.39 |
| 11-01 | Gp3 | g.chr20:54970777G>A  | Splice Site       | CSTF1         | p.G57R   | cleavage stimulation fac   | 71 (0.00)  | 55 (0.15)  | 0.39 |
| 11-01 | Gp3 | g.chr20:54974152G>C  | Missense Mutation | CSTF1         | p.D259H  | cleavage stimulation fac   | 47 (0.00)  | 41 (0.15)  | 0.39 |
| 11-01 | Gp3 | g.chr5:134678987G>A  | Missense Mutation | CTC-349C3.1   | p.S90N   |                            | 73 (0.00)  | 39 (0.33)  | 0.89 |
| 11-01 | Gp3 | g.chr19:22869250T>A  | RNA               | CTC-457E21.9  |          |                            | 32 (0.00)  | 54 (0.24)  | 0.64 |
| 11-01 | Gp3 | g.chr15:81962787C>A  | lincRNA           | CTD-2034I4.2  |          |                            | 15 (0.00)  | 18 (0.39)  | 1.04 |
| 11-01 | Gp3 | g.chr1:227598522G>A  | lincRNA           | CTD-2090I13.1 |          |                            | 25 (0.00)  | 37 (0.24)  | 0.65 |
| 11-01 | Gp3 | g.chr19:50562849C>T  | RNA               | CTD-2126E3.1  |          |                            | 44 (0.00)  | 22 (0.27)  | 0.73 |
| 11-01 | Gp3 | g.chr17:37214269C>A  | RNA               | CTD-2206N4.4  |          |                            | 42 (0.00)  | 29 (0.31)  | 0.83 |
| 11-01 | Gp3 | g.chr19:51671119C>T  | RNA               | CTD-3187F8.14 |          |                            | 33 (0.00)  | 35 (0.74)  | 1.98 |
| 11-01 | Gp3 | g.chr19:51671126C>T  | RNA               | CTD-3187F8.14 |          |                            | 30 (0.00)  | 34 (0.71)  | 1.88 |
| 11-01 | Gp3 | g.chr18:46238063G>A  | Missense Mutation | CTIF          | p.R194Q  | CBP80/20-dependent tr      | 127 (0.01) | 110 (0.15) | 0.41 |
| 11-01 | Gp3 | g.chr2:204735548C>T  | Nonsense Mutation | CTLA4         | p.Q117*  | cytotoxic T-lymphocyte     | 86 (0.01)  | 78 (0.22)  | 0.58 |
| 11-01 | Gp3 | g.chr20:36365783G>A  | Missense Mutation | CTNBL1        | p.E75K   | catenin, beta like 1       | 29 (0.00)  | 32 (0.22)  | 0.58 |
| 11-01 | Gp3 | g.chr11:57569469C>G  | Silent            | CTNND1        | p.L407L  | catenin (cadherin-associ   | 82 (0.00)  | 36 (0.19)  | 0.52 |
| 11-01 | Gp3 | g.chr5:11732381G>A   | Missense Mutation | CTNND2        | p.A14V   | catenin (cadherin-associ   | 63 (0.00)  | 23 (0.35)  | 0.93 |
| 11-01 | Gp3 | g.chr17:3561388G>A   | Silent            | CTNS          | p.V257V  | cystinosin, lysosomal cy   | 18 (0.00)  | 17 (0.47)  | 1.25 |
| 11-01 | Gp3 | g.chr1:41471750C>T   | Missense Mutation | CTPS1         | p.T427M  | CTP synthase 1             | 20 (0.00)  | 27 (0.22)  | 0.59 |
| 11-01 | Gp3 | g.chrX:16685675C>A   | Missense Mutation | CTPS2         | p.D420Y  | CTP synthase 2             | 21 (0.00)  | 25 (0.92)  | 1.53 |
| 11-01 | Gp3 | g.chr16:67964635G>T  | Silent            | CTRL          | p.V104V  | chymotrypsin-like          | 18 (0.00)  | 29 (0.17)  | 0.46 |
| 11-01 | Gp3 | g.chr11:88033767G>T  | Missense Mutation | CTSC          | p.H230N  | cathepsin C                | 49 (0.00)  | 21 (0.24)  | 0.63 |
| 11-01 | Gp3 | g.chr9:90401753G>A   | RNA               | CTSL3P        |          | cathepsin L family mem     | 43 (0.00)  | 36 (0.17)  | 0.44 |
| 11-01 | Gp3 | g.chr9:90401773C>G   | RNA               | CTSL3P        |          | cathepsin L family mem     | 45 (0.00)  | 35 (0.26)  | 0.69 |
| 11-01 | Gp3 | g.chr1:112999793G>C  | Missense Mutation | CTTNBP2NL     | p.S560T  | CTTNBP2 N-terminal li      | 101 (0.00) | 66 (0.21)  | 0.57 |
| 11-01 | Gp3 | g.chr10:16989269G>A  | Silent            | CUBN          | p.V1769V | cubilin (intrinsic factor- | 34 (0.00)  | 16 (0.50)  | 1.33 |
| 11-01 | Gp3 | g.chr10:17164841C>G  | Missense Mutation | CUBN          | p.L182F  | cubilin (intrinsic factor- | 30 (0.00)  | 40 (0.15)  | 0.40 |
| 11-01 | Gp3 | g.chr10:104184105G>A | Silent            | CUEDC2        | p.I109I  | CUE domain containing      | 52 (0.00)  | 76 (0.14)  | 0.39 |

|       |     |                      |                   |         |          |                           |            |            |      |
|-------|-----|----------------------|-------------------|---------|----------|---------------------------|------------|------------|------|
| 11-01 | Gp3 | g.chr7:148489836G>A  | Missense Mutation | CUL1    | p.A609T  | cullin 1                  | 20 (0.00)  | 16 (0.31)  | 0.83 |
| 11-01 | Gp3 | g.chr13:113909419C>G | Missense Mutation | CUL4A   | p.Q671E  | cullin 4A                 | 18 (0.00)  | 17 (0.41)  | 1.10 |
| 11-01 | Gp3 | g.chr6:43018062G>A   | Silent            | CUL7    | p.D436D  | cullin 7                  | 15 (0.00)  | 38 (0.24)  | 0.63 |
| 11-01 | Gp3 | g.chr6:43167034G>A   | Silent            | CUL9    | p.E1027E | cullin 9                  | 155 (0.01) | 117 (0.19) | 0.50 |
| 11-01 | Gp3 | g.chr10:101993052C>T | Missense Mutation | CWF19L1 | p.D232N  | CWF19-like 1, cell cycl   | 53 (0.02)  | 32 (0.50)  | 1.33 |
| 11-01 | Gp3 | g.chr4:49019310C>A   | Silent            | CWH43   | p.R384R  | cell wall biogenesis 43   | 61 (0.00)  | 53 (0.17)  | 0.45 |
| 11-01 | Gp3 | g.chr3:39307715C>A   | Missense Mutation | CX3CR1  | p.G96C   | chemokine (C-X3-C mo      | 34 (0.00)  | 25 (0.44)  | 1.17 |
| 11-01 | Gp3 | g.chrX:45013232C>A   | Missense Mutation | CXorf36 | p.G295V  | chromosome X open rea     | 52 (0.00)  | 22 (0.27)  | 0.45 |
| 11-01 | Gp3 | g.chr11:7690541G>T   | Missense Mutation | CYB5R2  | p.Q95K   | cytochrome b5 reductas    | 32 (0.00)  | 19 (0.32)  | 0.84 |
| 11-01 | Gp3 | g.chr11:7690542G>T   | Silent            | CYB5R2  | p.P94P   | cytochrome b5 reductas    | 32 (0.00)  | 19 (0.32)  | 0.84 |
| 11-01 | Gp3 | g.chr6:84644355G>T   | Missense Mutation | CYB5R4  | p.V286F  | cytochrome b5 reductas    | 90 (0.00)  | 49 (0.24)  | 0.65 |
| 11-01 | Gp3 | g.chr15:22939178C>T  | Missense Mutation | CYFIP1  | p.L302F  | cytoplasmic FMR1 inter    | 41 (0.00)  | 24 (0.42)  | 1.11 |
| 11-01 | Gp3 | g.chr5:156760428G>T  | Nonsense Mutation | CYFIP2  | p.E761*  | cytoplasmic FMR1 inter    | 46 (0.00)  | 31 (0.32)  | 0.86 |
| 11-01 | Gp3 | g.chr5:156768127C>A  | Missense Mutation | CYFIP2  | p.P853T  | cytoplasmic FMR1 inter    | 25 (0.00)  | 36 (0.22)  | 0.59 |
| 11-01 | Gp3 | g.chr16:50815165G>A  | Silent            | CYLD    | p.E506E  | cylindromatosis (turban   | 76 (0.00)  | 58 (0.19)  | 0.51 |
| 11-01 | Gp3 | g.chr15:74659804G>T  | Silent            | CYP11A1 | p.S41S   | cytochrome P450, famil    | 22 (0.00)  | 35 (0.20)  | 0.53 |
| 11-01 | Gp3 | g.chr15:51514629G>A  | Missense Mutation | CYP19A1 | p.S182L  | cytochrome P450, famil    | 88 (0.00)  | 46 (0.33)  | 0.87 |
| 11-01 | Gp3 | g.chr2:204131355C>G  | Missense Mutation | CYP20A1 | p.T184R  | cytochrome P450, famil    | 100 (0.00) | 125 (0.17) | 0.45 |
| 11-01 | Gp3 | g.chr2:72360239G>A   | Silent            | CYP26B1 | p.Y162Y  | cytochrome P450, famil    | 17 (0.00)  | 22 (0.36)  | 0.55 |
| 11-01 | Gp3 | g.chr19:41597700G>A  | Missense Mutation | CYP2A13 | p.E240K  | cytochrome P450, famil    | 87 (0.00)  | 86 (0.19)  | 0.50 |
| 11-01 | Gp3 | g.chr19:41384694T>A  | Missense Mutation | CYP2A7  | p.I268F  | cytochrome P450, famil    | 26 (0.00)  | 17 (0.29)  | 0.78 |
| 11-01 | Gp3 | g.chr19:41497274C>T  | Missense Mutation | CYP2B6  | p.R22C   | cytochrome P450, famil    | 90 (0.00)  | 30 (0.23)  | 0.62 |
| 11-01 | Gp3 | g.chr10:96698447C>T  | Missense Mutation | CYP2C9  | p.S3F    | cytochrome P450, famil    | 161 (0.00) | 89 (0.20)  | 0.54 |
| 11-01 | Gp3 | g.chr10:96698472C>T  | Silent            | CYP2C9  | p.L11L   | cytochrome P450, famil    | 148 (0.00) | 79 (0.25)  | 0.68 |
| 11-01 | Gp3 | g.chr1:60359411G>T   | Missense Mutation | CYP2J2  | p.P474Q  | cytochrome P450, famil    | 98 (0.00)  | 72 (0.22)  | 0.59 |
| 11-01 | Gp3 | g.chr7:99359716G>T   | Missense Mutation | CYP3A4  | p.L401I  | cytochrome P450, famil    | 61 (0.00)  | 46 (0.17)  | 0.46 |
| 11-01 | Gp3 | g.chr7:99359833C>A   | Nonsense Mutation | CYP3A4  | p.E362*  | cytochrome P450, famil    | 45 (0.02)  | 23 (0.39)  | 1.04 |
| 11-01 | Gp3 | g.chr7:99375696C>T   | Missense Mutation | CYP3A4  | p.C58Y   | cytochrome P450, famil    | 67 (0.01)  | 51 (0.24)  | 0.63 |
| 11-01 | Gp3 | g.chr7:99247735G>A   | Silent            | CYP3A5  | p.V458V  | cytochrome P450, famil    | 108 (0.00) | 55 (0.15)  | 0.39 |
| 11-01 | Gp3 | g.chr7:99306836C>A   | Missense Mutation | CYP3A7  | p.V359L  | cytochrome P450, famil    | 44 (0.00)  | 27 (0.26)  | 0.69 |
| 11-01 | Gp3 | g.chr4:5018692C>T    | Splice Site       | CYTL1   |          | cytokine-like 1           | 67 (0.00)  | 60 (0.33)  | 0.89 |
| 11-01 | Gp3 | g.chr6:39835308C>T   | Silent            | DAAM2   | p.L151L  | dishevelled associated a  | 164 (0.00) | 92 (0.17)  | 0.46 |
| 11-01 | Gp3 | g.chr1:57602244C>A   | Missense Mutation | DAB1    | p.G93V   | Dab, reelin signal transd | 35 (0.00)  | 47 (0.21)  | 0.57 |
| 11-01 | Gp3 | g.chr5:39377119C>A   | Missense Mutation | DAB2    | p.L590F  | Dab, mitogen-responsiv    | 75 (0.00)  | 43 (0.16)  | 0.43 |
| 11-01 | Gp3 | g.chr9:124338691C>T  | Intron            | DAB2IP  |          | DAB2 interacting protei   | 197 (0.00) | 150 (0.15) | 0.41 |



|       |     |                     |                   |         |         |                          |            |            |      |
|-------|-----|---------------------|-------------------|---------|---------|--------------------------|------------|------------|------|
| 11-01 | Gp3 | g.chr9:124341496G>T | Intron            | DAB2IP  |         | DAB2 interacting protei  | 144 (0.00) | 52 (0.15)  | 0.41 |
| 11-01 | Gp3 | g.chr9:124368924G>A | Intron            | DAB2IP  |         | DAB2 interacting protei  | 43 (0.00)  | 26 (0.38)  | 1.03 |
| 11-01 | Gp3 | g.chr9:124380271C>T | Intron            | DAB2IP  |         | DAB2 interacting protei  | 83 (0.00)  | 48 (0.17)  | 0.44 |
| 11-01 | Gp3 | g.chr9:124381391C>A | Intron            | DAB2IP  |         | DAB2 interacting protei  | 191 (0.01) | 128 (0.30) | 0.81 |
| 11-01 | Gp3 | g.chr9:124382316C>G | Intron            | DAB2IP  |         | DAB2 interacting protei  | 46 (0.00)  | 37 (0.76)  | 2.02 |
| 11-01 | Gp3 | g.chr9:124390321G>A | Intron            | DAB2IP  |         | DAB2 interacting protei  | 36 (0.00)  | 14 (0.43)  | 1.14 |
| 11-01 | Gp3 | g.chr9:124395612C>A | Intron            | DAB2IP  |         | DAB2 interacting protei  | 42 (0.00)  | 25 (0.32)  | 0.85 |
| 11-01 | Gp3 | g.chr9:124405956C>T | Intron            | DAB2IP  |         | DAB2 interacting protei  | 59 (0.00)  | 40 (0.15)  | 0.40 |
| 11-01 | Gp3 | g.chr9:124413239C>T | Intron            | DAB2IP  |         | DAB2 interacting protei  | 99 (0.00)  | 94 (0.28)  | 0.74 |
| 11-01 | Gp3 | g.chr9:124422620G>T | Intron            | DAB2IP  |         | DAB2 interacting protei  | 52 (0.00)  | 23 (0.26)  | 0.70 |
| 11-01 | Gp3 | g.chr9:124432161G>T | Intron            | DAB2IP  |         | DAB2 interacting protei  | 84 (0.00)  | 42 (0.17)  | 0.44 |
| 11-01 | Gp3 | g.chr9:124440786G>A | Intron            | DAB2IP  |         | DAB2 interacting protei  | 90 (0.00)  | 104 (0.26) | 0.69 |
| 11-01 | Gp3 | g.chr9:124441780G>A | Intron            | DAB2IP  |         | DAB2 interacting protei  | 68 (0.00)  | 61 (0.26)  | 0.70 |
| 11-01 | Gp3 | g.chr9:124454033G>T | Intron            | DAB2IP  |         | DAB2 interacting protei  | 40 (0.00)  | 29 (0.24)  | 0.64 |
| 11-01 | Gp3 | g.chr9:124456526C>T | Intron            | DAB2IP  |         | DAB2 interacting protei  | 57 (0.00)  | 26 (0.23)  | 0.62 |
| 11-01 | Gp3 | g.chr9:124475337G>T | Intron            | DAB2IP  |         | DAB2 interacting protei  | 51 (0.00)  | 35 (0.17)  | 0.46 |
| 11-01 | Gp3 | g.chr9:124475365C>T | Intron            | DAB2IP  |         | DAB2 interacting protei  | 41 (0.00)  | 32 (0.22)  | 0.58 |
| 11-01 | Gp3 | g.chr9:124478145G>A | Intron            | DAB2IP  |         | DAB2 interacting protei  | 68 (0.00)  | 42 (0.24)  | 0.63 |
| 11-01 | Gp3 | g.chr9:124479041C>G | Intron            | DAB2IP  |         | DAB2 interacting protei  | 33 (0.00)  | 16 (0.44)  | 1.17 |
| 11-01 | Gp3 | g.chr9:124499317G>A | Intron            | DAB2IP  |         | DAB2 interacting protei  | 36 (0.00)  | 16 (0.50)  | 1.33 |
| 11-01 | Gp3 | g.chr9:124501467C>T | Intron            | DAB2IP  |         | DAB2 interacting protei  | 83 (0.00)  | 57 (0.18)  | 0.47 |
| 11-01 | Gp3 | g.chr9:124509314G>A | Intron            | DAB2IP  |         | DAB2 interacting protei  | 60 (0.00)  | 37 (0.16)  | 0.43 |
| 11-01 | Gp3 | g.chr9:124509326G>C | Intron            | DAB2IP  |         | DAB2 interacting protei  | 58 (0.00)  | 33 (0.15)  | 0.40 |
| 11-01 | Gp3 | g.chr9:124510250G>C | Intron            | DAB2IP  |         | DAB2 interacting protei  | 148 (0.01) | 67 (0.15)  | 0.40 |
| 11-01 | Gp3 | g.chr9:124521760C>T | Intron            | DAB2IP  |         | DAB2 interacting protei  | 50 (0.00)  | 43 (0.19)  | 0.50 |
| 11-01 | Gp3 | g.chr9:124540184G>A | Intron            | DAB2IP  |         | DAB2 interacting protei  | 259 (0.00) | 236 (0.15) | 0.40 |
| 11-01 | Gp3 | g.chr1:173794378C>A | Missense Mutation | DARS2   | p.P4H   | aspartyl-tRNA synthetase | 53 (0.00)  | 21 (0.29)  | 0.76 |
| 11-01 | Gp3 | g.chr1:173826789C>A | Silent            | DARS2   | p.P628P | aspartyl-tRNA synthetase | 46 (0.00)  | 25 (0.24)  | 0.64 |
| 11-01 | Gp3 | g.chr17:42825720C>T | Missense Mutation | DBF4B   | p.S359F | DBF4 zinc finger B       | 48 (0.00)  | 31 (0.19)  | 0.52 |
| 11-01 | Gp3 | g.chr5:176894328G>T | Silent            | DBN1    | p.T161T | drebrin 1                | 16 (0.00)  | 27 (0.37)  | 0.99 |
| 11-01 | Gp3 | g.chr1:100672026G>A | Missense Mutation | DBT     | p.T395I | dihydroliipoamide branch | 76 (0.00)  | 62 (0.15)  | 0.39 |
| 11-01 | Gp3 | g.chr8:104453792C>A | Missense Mutation | DCAF13  | p.S551Y | DDB1 and CUL4 associ     | 55 (0.00)  | 29 (0.31)  | 0.83 |
| 11-01 | Gp3 | g.chr19:14071165C>G | Silent            | DCAF15  | p.V531V | DDB1 and CUL4 associ     | 22 (0.00)  | 18 (0.44)  | 1.19 |
| 11-01 | Gp3 | g.chr14:73425428T>C | Missense Mutation | DCAF4   | p.F298S | DDB1 and CUL4 associ     | 25 (0.00)  | 34 (0.35)  | 0.94 |
| 11-01 | Gp3 | g.chr8:88885570C>A  | Missense Mutation | DCAF4L2 | p.L210F | DDB1 and CUL4 associ     | 27 (0.00)  | 25 (0.20)  | 0.67 |

|       |     |                      |                   |         |          |                                           |            |      |
|-------|-----|----------------------|-------------------|---------|----------|-------------------------------------------|------------|------|
| 11-01 | Gp3 | g.chr3:98568381G>A   | Silent            | DCBLD2  | p.I165I  | discoidin, CUB and LC117 (0.00)           | 31 (0.32)  | 0.86 |
| 11-01 | Gp3 | g.chr11:6652320G>A   | Silent            | DCHS1   | p.S1298S | dachsous cadherin-related 25 (0.00)       | 15 (0.33)  | 0.89 |
| 11-01 | Gp3 | g.chr4:155254155G>T  | Missense Mutation | DCHS2   | p.L570M  | dachsous cadherin-related 70 (0.00)       | 60 (0.15)  | 0.40 |
| 11-01 | Gp3 | g.chr4:155256214G>A  | Missense Mutation | DCHS2   | p.T341I  | dachsous cadherin-related 55 (0.00)       | 50 (0.24)  | 0.64 |
| 11-01 | Gp3 | g.chr10:115601320C>A | Splice Site       | DCLRE1A |          | DNA cross-link repair 143 (0.00)          | 22 (0.27)  | 0.73 |
| 11-01 | Gp3 | g.chr12:91539999C>T  | Missense Mutation | DCN     | p.V306I  | decorin 38 (0.00)                         | 23 (0.35)  | 0.93 |
| 11-01 | Gp3 | g.chr13:95117913G>C  | Missense Mutation | DCT     | p.F279L  | dopachrome tautomerase 18 (0.00)          | 13 (0.38)  | 1.03 |
| 11-01 | Gp3 | g.chr11:108577527C>T | Nonsense Mutation | DDX10   | p.Q429*  | DEAD (Asp-Glu-Ala-A 53 (0.00)             | 19 (0.42)  | 1.12 |
| 11-01 | Gp3 | g.chr12:31255454C>A  | Missense Mutation | DDX11   | p.L789I  | DEAD/H (Asp-Glu-Ala 70 (0.00)             | 46 (0.52)  | 1.39 |
| 11-01 | Gp3 | g.chr16:70363866C>A  | Silent            | DDX19B  | p.T306T  | DEAD (Asp-Glu-Ala-A 42 (0.00)             | 48 (0.19)  | 0.50 |
| 11-01 | Gp3 | g.chr1:112303197C>A  | Missense Mutation | DDX20   | p.Q223K  | DEAD (Asp-Glu-Ala-A 60 (0.02)             | 56 (0.18)  | 0.48 |
| 11-01 | Gp3 | g.chr10:70728752A>C  | Missense Mutation | DDX21   | p.T371P  | DEAD (Asp-Glu-Ala-A 25 (0.00)             | 17 (0.29)  | 0.78 |
| 11-01 | Gp3 | g.chrX:134714066G>T  | Nonsense Mutation | DDX26B  | p.E788*  | DEAD/H (Asp-Glu-Ala 45 (0.00)             | 15 (0.40)  | 0.67 |
| 11-01 | Gp3 | g.chr16:68056263G>T  | Silent            | DDX28   | p.S281S  | DEAD (Asp-Glu-Ala-A 46 (0.00)             | 38 (0.16)  | 0.42 |
| 11-01 | Gp3 | g.chr5:55075872G>A   | Missense Mutation | DDX4    | p.G159R  | DEAD (Asp-Glu-Ala-A 62 (0.00)             | 39 (0.18)  | 0.48 |
| 11-01 | Gp3 | g.chr5:134120216G>A  | Missense Mutation | DDX46   | p.G443R  | DEAD (Asp-Glu-Ala-A 98 (0.00)             | 122 (0.17) | 0.46 |
| 11-01 | Gp3 | g.chr10:70666761G>A  | Missense Mutation | DDX50   | p.E128K  | DEAD (Asp-Glu-Ala-A 34 (0.03)             | 23 (0.39)  | 1.04 |
| 11-01 | Gp3 | g.chr10:70706381G>A  | Missense Mutation | DDX50   | p.D737N  | DEAD (Asp-Glu-Ala-A 65 (0.00)             | 48 (0.35)  | 0.94 |
| 11-01 | Gp3 | g.chrX:23019372G>C   | Missense Mutation | DDX53   | p.D400H  | DEAD (Asp-Glu-Ala-A 47 (0.00)             | 12 (0.67)  | 1.11 |
| 11-01 | Gp3 | g.chr4:169195233C>T  | Splice Site       | DDX60   | p.R769Q  | DEAD (Asp-Glu-Ala-A 18 (0.00)             | 12 (0.42)  | 1.11 |
| 11-01 | Gp3 | g.chr1:161093938C>A  | Missense Mutation | DEDD    | p.R105S  | death effector domain c20 (0.00)          | 18 (0.39)  | 1.04 |
| 11-01 | Gp3 | g.chr6:35280141G>T   | Silent            | DEF6    | p.L162L  | differentially expressed 22 (0.00)        | 21 (0.24)  | 0.63 |
| 11-01 | Gp3 | g.chr6:35280153G>T   | Silent            | DEF6    | p.L166L  | differentially expressed 24 (0.00)        | 24 (0.21)  | 0.56 |
| 11-01 | Gp3 | g.chr7:140302030C>A  | Missense Mutation | DENND2A | p.K56N   | DENN/MADD domain 49 (0.00)                | 16 (0.38)  | 1.00 |
| 11-01 | Gp3 | g.chr1:153903016T>A  | Splice Site       | DENND4B | p.I1448I | DENN/MADD domain 62 (0.02)                | 31 (0.32)  | 0.86 |
| 11-01 | Gp3 | g.chr9:19300313C>A   | Missense Mutation | DENND4C | p.A432D  | DENN/MADD domain 32 (0.00)                | 19 (0.37)  | 0.98 |
| 11-01 | Gp3 | g.chr12:31555468C>T  | Missense Mutation | DENND5B | p.M971I  | DENN/MADD domain 92 (0.00)                | 63 (0.16)  | 0.42 |
| 11-01 | Gp3 | g.chr12:31568306G>A  | Silent            | DENND5B | p.D849D  | DENN/MADD domain 21 (0.00)                | 14 (0.79)  | 2.10 |
| 11-01 | Gp3 | g.chr12:123247426G>A | Missense Mutation | DENR    | p.R54K   | density-regulated protein 22 (0.00)       | 23 (0.26)  | 0.70 |
| 11-01 | Gp3 | g.chr8:120940804G>T  | Missense Mutation | DEPTOR  | p.G96V   | DEP domain containing 48 (0.00)           | 22 (0.27)  | 0.73 |
| 11-01 | Gp3 | g.chr1:244849944C>T  | Missense Mutation | DESI2   | p.H30Y   | desumoylating isopeptidase 57 (0.00)      | 47 (0.26)  | 0.68 |
| 11-01 | Gp3 | g.chr12:56330808C>T  | Silent            | DGKA    | p.T24T   | diacylglycerol kinase, alpha 53 (0.00)    | 56 (0.25)  | 0.67 |
| 11-01 | Gp3 | g.chr7:14217750C>G   | Missense Mutation | DGKB    | p.V718L  | diacylglycerol kinase, beta 76 (0.00)     | 92 (0.24)  | 0.64 |
| 11-01 | Gp3 | g.chr11:46400006G>C  | Splice Site       | DGKZ    |          | diacylglycerol kinase, zeta 48 (0.00)     | 26 (0.19)  | 0.51 |
| 11-01 | Gp3 | g.chr1:55340858C>T   | Missense Mutation | DHCR24  | p.E174K  | 24-dehydrocholesterol reductase 29 (0.00) | 29 (0.21)  | 0.55 |

|       |     |                      |                   |        |          |                           |            |            |      |
|-------|-----|----------------------|-------------------|--------|----------|---------------------------|------------|------------|------|
| 11-01 | Gp3 | g.chr14:24766019G>C  | Missense Mutation | DHRS1  | p.S73R   | dehydrogenase/reductas    | 46 (0.00)  | 59 (0.22)  | 0.59 |
| 11-01 | Gp3 | g.chr17:9680562G>T   | Silent            | DHRS7C | p.I173I  | dehydrogenase/reductas    | 42 (0.00)  | 65 (0.28)  | 0.74 |
| 11-01 | Gp3 | g.chr17:9683329C>A   | Silent            | DHRS7C | p.L97L   | dehydrogenase/reductas    | 29 (0.00)  | 54 (0.26)  | 0.69 |
| 11-01 | Gp3 | g.chr2:169939948C>T  | Silent            | DHRS9  | p.L141L  | dehydrogenase/reductas    | 44 (0.00)  | 29 (0.21)  | 0.55 |
| 11-01 | Gp3 | g.chr10:12123535C>T  | Silent            | DHTKD1 | p.I73I   | dehydrogenase E1 and t    | 60 (0.00)  | 50 (0.24)  | 0.64 |
| 11-01 | Gp3 | g.chr10:12139862C>T  | Missense Mutation | DHTKD1 | p.A513V  | dehydrogenase E1 and t    | 33 (0.00)  | 42 (0.14)  | 0.38 |
| 11-01 | Gp3 | g.chr19:47858437G>T  | Nonsense Mutation | DHX34  | p.E283*  | DEAH (Asp-Glu-Ala-H       | 30 (0.00)  | 34 (0.18)  | 0.47 |
| 11-01 | Gp3 | g.chr20:37597835G>A  | Missense Mutation | DHX35  | p.R51K   | DEAH (Asp-Glu-Ala-H       | 62 (0.00)  | 34 (0.15)  | 0.39 |
| 11-01 | Gp3 | g.chr17:41582079G>T  | Missense Mutation | DHX8   | p.W538C  | DEAH (Asp-Glu-Ala-H       | 61 (0.00)  | 28 (0.39)  | 1.05 |
| 11-01 | Gp3 | g.chr1:210010291C>A  | Missense Mutation | DIEXF  | p.S266Y  | digestive organ expansi   | 61 (0.00)  | 24 (0.38)  | 1.00 |
| 11-01 | Gp3 | g.chr12:51090857C>G  | Silent            | DIP2B  | p.S649S  | DIP2 disco-interacting p  | 71 (0.00)  | 59 (0.15)  | 0.41 |
| 11-01 | Gp3 | g.chr12:51127925C>T  | Missense Mutation | DIP2B  | p.S1330L | DIP2 disco-interacting p  | 61 (0.00)  | 59 (0.27)  | 0.72 |
| 11-01 | Gp3 | g.chr10:408515C>A    | Silent            | DIP2C  | p.L903L  | DIP2 disco-interacting p  | 43 (0.00)  | 21 (0.52)  | 1.40 |
| 11-01 | Gp3 | g.chr19:2717707C>A   | Missense Mutation | DIRAS1 | p.R33L   | DIRAS family, GTP-bir     | 18 (0.00)  | 36 (0.19)  | 0.64 |
| 11-01 | Gp3 | g.chr2:189599393C>G  | Missense Mutation | DIRC1  | p.R85S   | disrupted in renal carcin | 40 (0.00)  | 41 (0.20)  | 0.52 |
| 11-01 | Gp3 | g.chr3:122598218C>A  | Missense Mutation | DIRC2  | p.S477Y  | disrupted in renal carcin | 23 (0.00)  | 17 (0.41)  | 1.10 |
| 11-01 | Gp3 | g.chr1:223178570C>G  | Nonsense Mutation | DISP1  | p.Y1277* | dispatched homolog 1 (I   | 94 (0.00)  | 39 (0.18)  | 0.48 |
| 11-01 | Gp3 | g.chrX:153993728C>A  | Missense Mutation | DKC1   | p.H32N   | dyskeratosis congenita    | 122 (0.00) | 26 (0.50)  | 0.83 |
| 11-01 | Gp3 | g.chr3:38126801G>C   | Missense Mutation | DLEC1  | p.G433A  | deleted in lung and esop  | 81 (0.00)  | 44 (0.16)  | 0.42 |
| 11-01 | Gp3 | g.chrX:69720395C>A   | Silent            | DLG3   | p.A772A  | discs, large homolog 3 (  | 16 (0.00)  | 26 (0.23)  | 0.38 |
| 11-01 | Gp3 | g.chrX:69720401C>A   | Missense Mutation | DLG3   | p.F774L  | discs, large homolog 3 (  | 16 (0.00)  | 26 (0.73)  | 1.22 |
| 11-01 | Gp3 | g.chr17:7096417C>A   | Silent            | DLG4   | p.R568R  | discs, large homolog 4 (  | 177 (0.00) | 158 (0.15) | 0.41 |
| 11-01 | Gp3 | g.chr17:7122168T>C   | Start Codon SNP   | DLG4   | p.M1V    | discs, large homolog 4 (  | 50 (0.00)  | 18 (0.28)  | 0.74 |
| 11-01 | Gp3 | g.chr10:79569407G>A  | Silent            | DLG5   | p.H1515H | discs, large homolog 5 (  | 103 (0.00) | 67 (0.37)  | 1.00 |
| 11-01 | Gp3 | g.chr6:170597853C>A  | Missense Mutation | DLL1   | p.A126S  | delta-like 1 (Drosophila) | 26 (0.00)  | 25 (0.20)  | 0.53 |
| 11-01 | Gp3 | g.chr10:124399664C>A | Missense Mutation | DMBT1  | p.Q2222K | deleted in malignant bra  | 92 (0.00)  | 92 (0.18)  | 0.49 |
| 11-01 | Gp3 | g.chr22:38962647C>T  | Missense Mutation | DMC1   | p.G64E   | DNA meiotic recombina     | 47 (0.00)  | 32 (0.19)  | 0.50 |
| 11-01 | Gp3 | g.chrX:31227700G>C   | Missense Mutation | DMD    | p.R3160G | dystrophin                | 24 (0.00)  | 43 (0.35)  | 0.58 |
| 11-01 | Gp3 | g.chrX:32407728G>A   | Missense Mutation | DMD    | p.R1470C | dystrophin                | 35 (0.00)  | 35 (0.23)  | 0.38 |
| 11-01 | Gp3 | g.chr19:36001275C>T  | Missense Mutation | DMKN   | p.E19K   | dermokine                 | 37 (0.00)  | 35 (0.14)  | 0.38 |
| 11-01 | Gp3 | g.chr5:118469514G>A  | Missense Mutation | DMXL1  | p.R632K  | Dmx-like 1                | 68 (0.00)  | 36 (0.25)  | 0.67 |
| 11-01 | Gp3 | g.chr5:118485228C>A  | Missense Mutation | DMXL1  | p.H1236N | Dmx-like 1                | 78 (0.00)  | 48 (0.17)  | 0.44 |
| 11-01 | Gp3 | g.chr5:118485528C>T  | Missense Mutation | DMXL1  | p.L1336F | Dmx-like 1                | 55 (0.00)  | 51 (0.16)  | 0.42 |
| 11-01 | Gp3 | g.chr12:124298369T>C | Silent            | DNAH10 | p.I1112I | dynein, axonemal, heav    | 84 (0.00)  | 31 (0.16)  | 0.43 |
| 11-01 | Gp3 | g.chr12:124358188C>A | Silent            | DNAH10 | p.T2505T | dynein, axonemal, heav    | 23 (0.00)  | 23 (0.83)  | 2.20 |

|       |     |                      |                   |         |          |                           |            |            |      |
|-------|-----|----------------------|-------------------|---------|----------|---------------------------|------------|------------|------|
| 11-01 | Gp3 | g.chr12:124364340C>G | Missense Mutation | DNAH10  | p.L2758V | dynein, axonemal, heav    | 169 (0.00) | 78 (0.31)  | 0.82 |
| 11-01 | Gp3 | g.chr7:21695529G>A   | Missense Mutation | DNAH11  | p.R1675K | dynein, axonemal, heav    | 117 (0.00) | 92 (0.15)  | 0.41 |
| 11-01 | Gp3 | g.chr1:225506331C>T  | Missense Mutation | DNAH14  | p.A2350V | dynein, axonemal, heav    | 64 (0.00)  | 35 (0.14)  | 0.38 |
| 11-01 | Gp3 | g.chr17:76475696C>G  | Missense Mutation | DNAH17  | p.A2586P | dynein, axonemal, heav    | 59 (0.00)  | 57 (0.16)  | 0.42 |
| 11-01 | Gp3 | g.chr17:7695593G>A   | Silent            | DNAH2   | p.V2359V | dynein, axonemal, heav    | 22 (0.00)  | 24 (0.21)  | 0.56 |
| 11-01 | Gp3 | g.chr16:20963789C>A  | Missense Mutation | DNAH3   | p.K3718N | dynein, axonemal, heav    | 43 (0.00)  | 43 (0.19)  | 0.50 |
| 11-01 | Gp3 | g.chr5:13776583C>T   | Nonsense Mutation | DNAH5   | p.W3113* | dynein, axonemal, heav    | 56 (0.00)  | 33 (0.18)  | 0.48 |
| 11-01 | Gp3 | g.chr5:13845029C>A   | Missense Mutation | DNAH5   | p.G1730W | dynein, axonemal, heav    | 63 (0.00)  | 50 (0.18)  | 0.48 |
| 11-01 | Gp3 | g.chr2:196636586G>A  | Missense Mutation | DNAH7   | p.S3744L | dynein, axonemal, heav    | 131 (0.00) | 103 (0.32) | 0.85 |
| 11-01 | Gp3 | g.chr2:196664151C>A  | Missense Mutation | DNAH7   | p.A3408S | dynein, axonemal, heav    | 31 (0.00)  | 23 (0.26)  | 0.70 |
| 11-01 | Gp3 | g.chr2:196728985C>A  | Missense Mutation | DNAH7   | p.C2465F | dynein, axonemal, heav    | 45 (0.00)  | 19 (0.26)  | 0.70 |
| 11-01 | Gp3 | g.chr2:196765016C>A  | Missense Mutation | DNAH7   | p.G1513V | dynein, axonemal, heav    | 106 (0.00) | 38 (0.18)  | 0.49 |
| 11-01 | Gp3 | g.chr6:38749040C>T   | Missense Mutation | DNAH8   | p.S500F  | dynein, axonemal, heav    | 84 (0.01)  | 44 (0.45)  | 1.21 |
| 11-01 | Gp3 | g.chr17:11806083G>T  | Missense Mutation | DNAH9   | p.E3818D | dynein, axonemal, heav    | 48 (0.00)  | 27 (0.19)  | 0.49 |
| 11-01 | Gp3 | g.chr9:34485212C>A   | Missense Mutation | DNAI1   | p.P52T   | dynein, axonemal, interr  | 99 (0.00)  | 146 (0.23) | 0.60 |
| 11-01 | Gp3 | g.chr16:46990969C>T  | Missense Mutation | DNAJA2  | p.G404E  | DnaJ (Hsp40) homolog,     | 165 (0.00) | 109 (0.17) | 0.46 |
| 11-01 | Gp3 | g.chr16:46998611T>A  | Missense Mutation | DNAJA2  | p.Q229L  | DnaJ (Hsp40) homolog,     | 123 (0.00) | 95 (0.19)  | 0.51 |
| 11-01 | Gp3 | g.chr16:4484519G>C   | Splice Site       | DNAJA3  |          | DnaJ (Hsp40) homolog,     | 152 (0.00) | 99 (0.25)  | 0.67 |
| 11-01 | Gp3 | g.chr19:14626916C>T  | Missense Mutation | DNAJB1  | p.D287N  | DnaJ (Hsp40) homolog,     | 56 (0.00)  | 63 (0.16)  | 0.42 |
| 11-01 | Gp3 | g.chr19:14626955G>A  | Missense Mutation | DNAJB1  | p.P274S  | DnaJ (Hsp40) homolog,     | 59 (0.00)  | 60 (0.18)  | 0.49 |
| 11-01 | Gp3 | g.chr1:6705160C>A    | Silent            | DNAJC11 | p.L307L  | DnaJ (Hsp40) homolog,     | 54 (0.00)  | 63 (0.17)  | 0.47 |
| 11-01 | Gp3 | g.chr1:6714023C>T    | Missense Mutation | DNAJC11 | p.S152N  | DnaJ (Hsp40) homolog,     | 85 (0.00)  | 38 (0.21)  | 0.56 |
| 11-01 | Gp3 | g.chr1:6714046C>T    | Silent            | DNAJC11 | p.E144E  | DnaJ (Hsp40) homolog,     | 66 (0.00)  | 45 (0.16)  | 0.41 |
| 11-01 | Gp3 | g.chr3:132218618C>T  | Missense Mutation | DNAJC13 | p.T1461I | DnaJ (Hsp40) homolog,     | 56 (0.00)  | 83 (0.42)  | 1.12 |
| 11-01 | Gp3 | g.chr1:15888765A>G   | Missense Mutation | DNAJC16 | p.Q428R  | DnaJ (Hsp40) homolog,     | 61 (0.00)  | 17 (0.41)  | 1.10 |
| 11-01 | Gp3 | g.chr5:34945012G>A   | Missense Mutation | DNAJC21 | p.V342M  | DnaJ (Hsp40) homolog,     | 282 (0.00) | 155 (0.14) | 0.38 |
| 11-01 | Gp3 | g.chr12:49745186C>T  | Silent            | DNAJC22 | p.N309N  | DnaJ (Hsp40) homolog,     | 40 (0.00)  | 32 (0.16)  | 0.42 |
| 11-01 | Gp3 | g.chr2:25170513C>T   | Missense Mutation | DNAJC27 | p.R265Q  | DnaJ (Hsp40) homolog,     | 66 (0.00)  | 41 (0.15)  | 0.39 |
| 11-01 | Gp3 | g.chr1:65849886C>A   | Missense Mutation | DNAJC6  | p.A226E  | DnaJ (Hsp40) homolog,     | 47 (0.00)  | 19 (0.32)  | 0.84 |
| 11-01 | Gp3 | g.chr17:40134275G>A  | Missense Mutation | DNAJC7  | p.P410L  | DnaJ (Hsp40) homolog,     | 28 (0.00)  | 30 (0.23)  | 0.62 |
| 11-01 | Gp3 | g.chr1:84867762G>A   | Splice Site       | DNASE2B |          | deoxyribonuclease II be   | 93 (0.00)  | 73 (0.33)  | 0.88 |
| 11-01 | Gp3 | g.chr11:6567813G>A   | Missense Mutation | DNHD1   | p.E1882K | dynein heavy chain dom    | 32 (0.00)  | 18 (0.33)  | 0.89 |
| 11-01 | Gp3 | g.chr11:6591267C>T   | Nonsense Mutation | DNHD1   | p.Q4298* | dynein heavy chain dom    | 51 (0.00)  | 28 (0.50)  | 1.33 |
| 11-01 | Gp3 | g.chr1:172001610C>A  | Missense Mutation | DNM3    | p.L220I  | dynamamin 3               | 204 (0.00) | 88 (0.39)  | 1.03 |
| 11-01 | Gp3 | g.chr10:101657967C>T | Silent            | DNMBP   | p.L932L  | dynamamin binding proteir | 57 (0.00)  | 50 (0.22)  | 0.59 |

|       |     |                      |                   |         |          |                                     |            |      |
|-------|-----|----------------------|-------------------|---------|----------|-------------------------------------|------------|------|
| 11-01 | Gp3 | g.chr10:101715472C>A | Missense Mutation | DNMBP   | p.D587Y  | dynamamin binding proteir 63 (0.00) | 55 (0.16)  | 0.44 |
| 11-01 | Gp3 | g.chr19:10270737G>A  | Missense Mutation | DNMT1   | p.T333M  | DNA (cytosine-5-)-metl 27 (0.00)    | 19 (0.79)  | 2.11 |
| 11-01 | Gp3 | g.chr2:25463207G>A   | Silent            | DNMT3A  | p.G539G  | DNA (cytosine-5-)-metl 74 (0.00)    | 23 (0.26)  | 0.70 |
| 11-01 | Gp3 | g.chr20:44430086C>A  | Missense Mutation | DNTTIP1 | p.L163I  | deoxynucleotidyltransfe 64 (0.00)   | 53 (0.21)  | 0.55 |
| 11-01 | Gp3 | g.chr16:30020398C>G  | Missense Mutation | DOC2A   | p.R149T  | double C2-like domains 42 (0.00)    | 33 (0.15)  | 0.40 |
| 11-01 | Gp3 | g.chr10:128798511C>T | Silent            | DOCK1   | p.L309L  | dedicator of cytokinesis 63 (0.00)  | 60 (0.17)  | 0.44 |
| 11-01 | Gp3 | g.chrX:117742300C>A  | Nonsense Mutation | DOCK11  | p.S953*  | dedicator of cytokinesis 21 (0.00)  | 19 (0.42)  | 0.70 |
| 11-01 | Gp3 | g.chr3:51183992G>C   | Silent            | DOCK3   | p.L253L  | dedicator of cytokinesis 84 (0.00)  | 53 (0.15)  | 0.40 |
| 11-01 | Gp3 | g.chr3:51315161C>A   | Nonsense Mutation | DOCK3   | p.C933*  | dedicator of cytokinesis 34 (0.00)  | 16 (0.31)  | 0.83 |
| 11-01 | Gp3 | g.chr7:111644172G>A  | Nonsense Mutation | DOCK4   | p.R18*   | dedicator of cytokinesis 36 (0.00)  | 15 (0.80)  | 2.13 |
| 11-01 | Gp3 | g.chr9:131708059C>T  | Silent            | DOLK    | p.G508G  | dolichol kinase 59 (0.02)           | 55 (0.15)  | 0.39 |
| 11-01 | Gp3 | g.chr9:131708498G>A  | Missense Mutation | DOLK    | p.A362V  | dolichol kinase 121 (0.00)          | 53 (0.17)  | 0.45 |
| 11-01 | Gp3 | g.chr6:83841908C>G   | Missense Mutation | DOPEY1  | p.T877R  | dopey family member 1 72 (0.00)     | 62 (0.26)  | 0.69 |
| 11-01 | Gp3 | g.chr6:83865763C>T   | Missense Mutation | DOPEY1  | p.A2182V | dopey family member 1 39 (0.00)     | 33 (0.15)  | 0.40 |
| 11-01 | Gp3 | g.chr6:83866998A>G   | Silent            | DOPEY1  | p.Q2234Q | dopey family member 1 43 (0.00)     | 21 (0.24)  | 0.63 |
| 11-01 | Gp3 | g.chr21:37642428G>A  | Missense Mutation | DOPEY2  | p.E1869K | dopey family member 2 156 (0.00)    | 105 (0.14) | 0.38 |
| 11-01 | Gp3 | g.chr11:118967933G>A | Silent            | DPAGT1  | p.N360N  | dolichyl-phosphate (UD 107 (0.00)   | 107 (0.21) | 0.55 |
| 11-01 | Gp3 | g.chr11:118971377C>A | Missense Mutation | DPAGT1  | p.K153N  | dolichyl-phosphate (UD 33 (0.00)    | 12 (0.50)  | 1.33 |
| 11-01 | Gp3 | g.chr16:89704074C>T  | Silent            | DPEP1   | p.A296A  | dipeptidase 1 (renal) 39 (0.03)     | 19 (0.26)  | 0.70 |
| 11-01 | Gp3 | g.chr16:68025758G>A  | Silent            | DPEP2   | p.H215H  | dipeptidase 2 39 (0.00)             | 21 (0.29)  | 0.76 |
| 11-01 | Gp3 | g.chr3:109028157C>A  | Nonsense Mutation | DPPA2   | p.E68*   | developmental pluripote 45 (0.00)   | 33 (0.15)  | 0.40 |
| 11-01 | Gp3 | g.chr1:98058829C>T   | Missense Mutation | DPYD    | p.R358H  | dihydropyrimidine dehy 96 (0.00)    | 77 (0.22)  | 0.59 |
| 11-01 | Gp3 | g.chr8:26435782G>A   | Silent            | DPYSL2  | p.Q4Q    | dihydropyrimidinase-lik 46 (0.00)   | 40 (0.53)  | 0.78 |
| 11-01 | Gp3 | g.chr8:26501061C>T   | Silent            | DPYSL2  | p.P306P  | dihydropyrimidinase-lik 23 (0.00)   | 12 (0.50)  | 0.75 |
| 11-01 | Gp3 | g.chr2:26644211C>A   | Missense Mutation | DRC1    | p.A100D  | dynein regulatory comp  44 (0.00)   | 22 (0.36)  | 0.97 |
| 11-01 | Gp3 | g.chr2:26653657G>A   | Missense Mutation | DRC1    | p.A228T  | dynein regulatory comp  90 (0.00)   | 53 (0.19)  | 0.50 |
| 11-01 | Gp3 | g.chr4:9784956G>A    | Missense Mutation | DRD5    | p.D435N  | dopamine receptor D5 50 (0.00)      | 34 (0.18)  | 0.47 |
| 11-01 | Gp3 | g.chr5:31526740C>A   | Silent            | DROSHA  | p.P100P  | drosha, ribonuclease typ 19 (0.00)  | 17 (0.29)  | 0.78 |
| 11-01 | Gp3 | g.chr18:28711715G>C  | Missense Mutation | DSC1    | p.Q777E  | desmocollin 1 44 (0.00)             | 65 (0.20)  | 0.53 |
| 11-01 | Gp3 | g.chr18:28736067G>A  | Missense Mutation | DSC1    | p.A137V  | desmocollin 1 44 (0.00)             | 23 (0.48)  | 1.28 |
| 11-01 | Gp3 | g.chr18:28737474T>G  | Missense Mutation | DSC1    | p.I71L   | desmocollin 1 28 (0.00)             | 12 (0.50)  | 1.33 |
| 11-01 | Gp3 | g.chr11:117340684G>A | Missense Mutation | DSCAML1 | p.P1049L | Down syndrome cell ad  43 (0.02)    | 21 (0.24)  | 0.63 |
| 11-01 | Gp3 | g.chr11:117403108G>T | Missense Mutation | DSCAML1 | p.A274E  | Down syndrome cell ad  20 (0.05)    | 19 (0.53)  | 1.40 |
| 11-01 | Gp3 | g.chr6:7571645G>C    | Missense Mutation | DSP     | p.M577I  | desmoplakin 88 (0.00)               | 29 (0.21)  | 0.55 |
| 11-01 | Gp3 | g.chr6:7583061G>T    | Nonsense Mutation | DSP     | p.E1856* | desmoplakin 67 (0.01)               | 71 (0.25)  | 0.68 |

|       |     |                      |                   |          |          |                            |            |            |      |
|-------|-----|----------------------|-------------------|----------|----------|----------------------------|------------|------------|------|
| 11-01 | Gp3 | g.chr6:56422189T>C   | Silent            | DST      | p.E4645E | dystonin                   | 18 (0.00)  | 15 (0.40)  | 1.07 |
| 11-01 | Gp3 | g.chr6:56464922G>A   | Missense Mutation | DST      | p.A3669V | dystonin                   | 74 (0.00)  | 40 (0.45)  | 1.20 |
| 11-01 | Gp3 | g.chr6:56468411G>A   | Missense Mutation | DST      | p.S3420F | dystonin                   | 158 (0.00) | 109 (0.28) | 0.76 |
| 11-01 | Gp3 | g.chr12:58001386G>A  | Missense Mutation | DTX3     | p.G247D  | deltex 3, E3 ubiquitin li  | 51 (0.00)  | 57 (0.19)  | 0.51 |
| 11-01 | Gp3 | g.chr11:58959625C>T  | Nonsense Mutation | DTX4     | p.Q426*  | deltex 4, E3 ubiquitin li  | 79 (0.00)  | 58 (0.29)  | 0.78 |
| 11-01 | Gp3 | g.chr15:45400349C>A  | Silent            | DUOX2    | p.L490L  | dual oxidase 2             | 38 (0.00)  | 36 (0.19)  | 0.52 |
| 11-01 | Gp3 | g.chr1:161723007G>A  | Missense Mutation | DUSP12   | p.V273I  | dual specificity phospho   | 31 (0.00)  | 23 (0.35)  | 0.93 |
| 11-01 | Gp3 | g.chr6:348108C>A     | Missense Mutation | DUSP22   | p.A90D   | dual specificity phospho   | 49 (0.00)  | 25 (0.20)  | 0.53 |
| 11-01 | Gp3 | g.chr14:102469137C>T | Missense Mutation | DYNC1H1  | p.T1573I | dynein, cytoplasmic 1, h   | 52 (0.00)  | 50 (0.20)  | 0.53 |
| 11-01 | Gp3 | g.chr14:102493587G>A | Missense Mutation | DYNC1H1  | p.V2950I | dynein, cytoplasmic 1, h   | 128 (0.01) | 40 (0.15)  | 0.40 |
| 11-01 | Gp3 | g.chr14:102507948C>A | Silent            | DYNC1H1  | p.I3993I | dynein, cytoplasmic 1, h   | 24 (0.00)  | 24 (0.38)  | 1.00 |
| 11-01 | Gp3 | g.chr7:95616462C>G   | Missense Mutation | DYNC1I1  | p.L297V  | dynein, cytoplasmic 1, i   | 98 (0.00)  | 67 (0.36)  | 0.96 |
| 11-01 | Gp3 | g.chr7:95665064G>A   | Splice Site       | DYNC1I1  | p.S472N  | dynein, cytoplasmic 1, i   | 87 (0.00)  | 64 (0.19)  | 0.50 |
| 11-01 | Gp3 | g.chr11:103004414G>T | Missense Mutation | DYNC2H1  | p.W695L  | dynein, cytoplasmic 2, h   | 121 (0.00) | 49 (0.33)  | 0.87 |
| 11-01 | Gp3 | g.chr1:206822002C>T  | Silent            | DYRK3    | p.L487L  | dual-specificity tyrosine  | 131 (0.00) | 59 (0.15)  | 0.41 |
| 11-01 | Gp3 | g.chr13:96274690G>T  | Missense Mutation | DZIP1    | p.N339K  | DAZ interacting zinc fir   | 113 (0.00) | 144 (0.18) | 0.48 |
| 11-01 | Gp3 | g.chr12:77449762C>A  | Missense Mutation | E2F7     | p.W81L   | E2F transcription factor   | 37 (0.03)  | 56 (0.32)  | 0.86 |
| 11-01 | Gp3 | g.chr10:131646681G>A | Missense Mutation | EBF3     | p.P368L  | early B-cell factor 3      | 24 (0.00)  | 25 (0.52)  | 1.39 |
| 11-01 | Gp3 | g.chr1:43632895C>T   | Silent            | EBNA1BP2 | p.E183E  | EBNA1 binding protein      | 71 (0.00)  | 58 (0.17)  | 0.46 |
| 11-01 | Gp3 | g.chr3:172520714C>T  | Missense Mutation | ECT2     | p.H653Y  | epithelial cell transformi | 50 (0.00)  | 39 (0.15)  | 0.41 |
| 11-01 | Gp3 | g.chr6:139164224C>G  | Missense Mutation | ECT2L    | p.H151D  | epithelial cell transformi | 28 (0.00)  | 29 (0.24)  | 0.64 |
| 11-01 | Gp3 | g.chr6:139164240C>T  | Missense Mutation | ECT2L    | p.T156I  | epithelial cell transformi | 31 (0.00)  | 27 (0.26)  | 0.69 |
| 11-01 | Gp3 | g.chr1:236645568G>A  | Splice Site       | EDARADD  | p.E79E   | EDAR-associated death      | 53 (0.00)  | 32 (0.28)  | 0.53 |
| 11-01 | Gp3 | g.chr15:74963984C>A  | Missense Mutation | EDC3     | p.G99V   | enhancer of mRNA dec       | 40 (0.00)  | 14 (0.43)  | 1.14 |
| 11-01 | Gp3 | g.chr20:33714069G>C  | Nonsense Mutation | EDEM2    | p.Y318*  | ER degradation enhance     | 54 (0.00)  | 52 (0.15)  | 0.41 |
| 11-01 | Gp3 | g.chr5:83402480C>T   | Nonsense Mutation | EDIL3    | p.W213*  | EGF-like repeats and di    | 42 (0.00)  | 34 (0.38)  | 1.02 |
| 11-01 | Gp3 | g.chr12:93173007C>A  | Missense Mutation | EEA1     | p.D1180Y | early endosome antigen     | 38 (0.03)  | 33 (0.58)  | 1.54 |
| 11-01 | Gp3 | g.chr13:32527498C>G  | RNA               | EEF1DP3  |          | eukaryotic translation el  | 44 (0.02)  | 47 (0.17)  | 0.45 |
| 11-01 | Gp3 | g.chr11:62338459G>C  | Missense Mutation | EEF1G    | p.T167S  | eukaryotic translation el  | 163 (0.00) | 99 (0.16)  | 0.43 |
| 11-01 | Gp3 | g.chr19:3982406C>T   | Missense Mutation | EEF2     | p.G210D  | eukaryotic translation el  | 27 (0.00)  | 47 (0.15)  | 0.40 |
| 11-01 | Gp3 | g.chr22:44063077C>G  | Missense Mutation | EFCAB6   | p.K630N  | EF-hand calcium bindin     | 117 (0.00) | 48 (0.15)  | 0.39 |
| 11-01 | Gp3 | g.chr3:19921152C>A   | Missense Mutation | EFHB     | p.D695Y  | EF-hand domain family.     | 29 (0.00)  | 13 (0.46)  | 1.23 |
| 11-01 | Gp3 | g.chr3:19921185T>C   | Missense Mutation | EFHB     | p.I684V  | EF-hand domain family.     | 29 (0.00)  | 15 (0.67)  | 1.78 |
| 11-01 | Gp3 | g.chr1:15752440C>T   | Nonsense Mutation | EFHD2    | p.Q128*  | EF-hand domain family.     | 37 (0.00)  | 29 (0.34)  | 0.92 |
| 11-01 | Gp3 | g.chr1:155057672G>A  | Silent            | EFNA3    | p.G73G   | ephrin-A3                  | 37 (0.00)  | 49 (0.14)  | 0.38 |

|       |     |                      |                   |         |          |                                      |            |      |
|-------|-----|----------------------|-------------------|---------|----------|--------------------------------------|------------|------|
| 11-01 | Gp3 | g.chr8:132980611C>A  | Silent            | EFR3A   | p.R309R  | EFR3 homolog A (S. ce 154 (0.01)     | 89 (0.17)  | 0.45 |
| 11-01 | Gp3 | g.chr14:23829031G>T  | Missense Mutation | EFS     | p.A219D  | embryonal Fyn-associat 24 (0.00)     | 19 (0.32)  | 0.84 |
| 11-01 | Gp3 | g.chr17:42959076G>A  | Silent            | EFTUD2  | p.D169D  | elongation factor Tu GT 37 (0.00)    | 27 (0.33)  | 0.89 |
| 11-01 | Gp3 | g.chr4:110890220C>G  | Missense Mutation | EGF     | p.P515A  | epidermal growth factor 108 (0.00)   | 61 (0.28)  | 0.74 |
| 11-01 | Gp3 | g.chrX:13651103G>A   | Splice Site       | EGFL6   |          | EGF-like-domain, multi 77 (0.00)     | 42 (0.40)  | 0.67 |
| 11-01 | Gp3 | g.chr5:38427253G>A   | Silent            | EGFLAM  | p.L651L  | EGF-like, fibronectin ty 50 (0.00)   | 27 (0.26)  | 0.69 |
| 11-01 | Gp3 | g.chr2:62934395C>A   | Silent            | EHBP1   | p.S23S   | EH domain binding prot 80 (0.00)     | 37 (0.27)  | 0.72 |
| 11-01 | Gp3 | g.chr2:62934407C>A   | Silent            | EHBP1   | p.L27L   | EH domain binding prot 61 (0.00)     | 28 (0.36)  | 0.95 |
| 11-01 | Gp3 | g.chr9:140622973C>T  | Missense Mutation | EHMT1   | p.S272L  | euchromatic histone-lys 42 (0.00)    | 18 (0.28)  | 0.74 |
| 11-01 | Gp3 | g.chr19:40023077C>T  | Silent            | EID2B   | p.V122V  | EP300 interacting inhibi 17 (0.00)   | 21 (0.24)  | 0.63 |
| 11-01 | Gp3 | g.chr15:40259908C>A  | Missense Mutation | EIF2AK4 | p.Q461K  | eukaryotic translation in 54 (0.00)  | 56 (0.34)  | 0.90 |
| 11-01 | Gp3 | g.chr15:40293216C>T  | Missense Mutation | EIF2AK4 | p.H984Y  | eukaryotic translation in 114 (0.00) | 40 (0.30)  | 0.80 |
| 11-01 | Gp3 | g.chr14:67843258T>A  | Missense Mutation | EIF2S1  | p.Y142N  | eukaryotic translation in 31 (0.00)  | 35 (0.14)  | 0.38 |
| 11-01 | Gp3 | g.chr20:32693214G>A  | Silent            | EIF2S2  | p.D51D   | eukaryotic translation in 21 (0.00)  | 33 (0.58)  | 1.54 |
| 11-01 | Gp3 | g.chr12:10659637G>T  | Missense Mutation | EIF2S3L | p.R379I  | 80 (0.00)                            | 39 (0.15)  | 0.41 |
| 11-01 | Gp3 | g.chr10:120825038G>A | Missense Mutation | EIF3A   | p.T332I  | eukaryotic translation in 30 (0.00)  | 23 (0.39)  | 1.04 |
| 11-01 | Gp3 | g.chr7:2400484G>T    | Missense Mutation | EIF3B   | p.K213N  | eukaryotic translation in 48 (0.00)  | 23 (0.22)  | 0.58 |
| 11-01 | Gp3 | g.chr16:28734799G>A  | Missense Mutation | EIF3C   | p.E323K  | eukaryotic translation in 180 (0.01) | 55 (0.15)  | 0.39 |
| 11-01 | Gp3 | g.chr8:117668163G>A  | Silent            | EIF3H   | p.V227V  | eukaryotic translation in 48 (0.00)  | 23 (0.26)  | 0.70 |
| 11-01 | Gp3 | g.chr15:44846829G>A  | Missense Mutation | EIF3J   | p.E125K  | eukaryotic translation in 55 (0.00)  | 37 (0.24)  | 0.65 |
| 11-01 | Gp3 | g.chr3:184039368C>T  | Silent            | EIF4G1  | p.S245S  | eukaryotic translation in 36 (0.00)  | 35 (0.14)  | 0.38 |
| 11-01 | Gp3 | g.chr3:184043688C>T  | Silent            | EIF4G1  | p.I970I  | eukaryotic translation in 47 (0.00)  | 14 (0.43)  | 1.14 |
| 11-01 | Gp3 | g.chr11:10820590C>A  | Missense Mutation | EIF4G2  | p.W869C  | eukaryotic translation in 74 (0.00)  | 44 (0.23)  | 0.61 |
| 11-01 | Gp3 | g.chr11:10820591C>A  | Missense Mutation | EIF4G2  | p.W869L  | eukaryotic translation in 72 (0.00)  | 44 (0.20)  | 0.55 |
| 11-01 | Gp3 | g.chr7:73609092G>T   | Missense Mutation | EIF4H   | p.G164V  | eukaryotic translation in 56 (0.00)  | 31 (0.19)  | 0.52 |
| 11-01 | Gp3 | g.chr13:41507662G>A  | Nonsense Mutation | ELF1    | p.Q587*  | E74-like factor 1 (ets do 91 (0.00)  | 38 (0.26)  | 0.70 |
| 11-01 | Gp3 | g.chr5:95242361G>C   | Missense Mutation | ELL2    | p.Q203E  | elongation factor, RNA 107 (0.00)    | 101 (0.23) | 0.61 |
| 11-01 | Gp3 | g.chr7:37253022G>A   | Missense Mutation | ELMO1   | p.A291V  | engulfment and cell mot 16 (0.00)    | 15 (0.33)  | 0.89 |
| 11-01 | Gp3 | g.chr7:73474292G>A   | Silent            | ELN     | p.L497L  | elastin 22 (0.00)                    | 40 (0.28)  | 0.73 |
| 11-01 | Gp3 | g.chr10:103988958C>T | Silent            | ELOVL3  | p.F254F  | ELOVL fatty acid elong 56 (0.00)     | 69 (0.20)  | 0.54 |
| 11-01 | Gp3 | g.chr14:89093181C>T  | Splice Site       | EML5    |          | echinoderm microtubule 50 (0.00)     | 31 (0.39)  | 1.03 |
| 11-01 | Gp3 | g.chr14:89153569C>A  | Nonsense Mutation | EML5    | p.G949*  | echinoderm microtubule 58 (0.00)     | 29 (0.48)  | 1.29 |
| 11-01 | Gp3 | g.chr2:55056593G>A   | Missense Mutation | EML6    | p.E276K  | echinoderm microtubule 44 (0.00)     | 27 (0.41)  | 1.09 |
| 11-01 | Gp3 | g.chr2:55143971G>A   | Missense Mutation | EML6    | p.D1192N | echinoderm microtubule 50 (0.00)     | 23 (0.74)  | 1.97 |
| 11-01 | Gp3 | g.chr2:55189679C>A   | Silent            | EML6    | p.T1663T | echinoderm microtubule 29 (0.00)     | 22 (0.32)  | 0.85 |

|       |     |                      |                   |         |          |                          |            |            |      |
|-------|-----|----------------------|-------------------|---------|----------|--------------------------|------------|------------|------|
| 11-01 | Gp3 | g.chr1:225706957C>A  | Nonsense Mutation | ENAH    | p.E268*  | enabled homolog (Dros    | 127 (0.01) | 111 (0.30) | 0.79 |
| 11-01 | Gp3 | g.chr4:71508264C>A   | Missense Mutation | ENAM    | p.P374Q  | enamelin                 | 65 (0.00)  | 31 (0.39)  | 1.03 |
| 11-01 | Gp3 | g.chr5:73930813C>A   | Missense Mutation | ENC1    | p.D427Y  | ectodermal-neural corte  | 121 (0.00) | 81 (0.16)  | 0.43 |
| 11-01 | Gp3 | g.chr5:73930863C>T   | Missense Mutation | ENC1    | p.R410H  | ectodermal-neural corte  | 76 (0.00)  | 56 (0.14)  | 0.38 |
| 11-01 | Gp3 | g.chr9:130605455G>A  | Missense Mutation | ENG     | p.T46I   | endoglin                 | 37 (0.00)  | 28 (0.25)  | 0.67 |
| 11-01 | Gp3 | g.chr9:130605511T>A  | Silent            | ENG     | p.T27T   | endoglin                 | 32 (0.00)  | 22 (0.45)  | 1.21 |
| 11-01 | Gp3 | g.chr12:7028861C>A   | Missense Mutation | ENO2    | p.P148T  | enolase 2 (gamma, neur   | 32 (0.00)  | 21 (0.29)  | 0.76 |
| 11-01 | Gp3 | g.chr6:46129364C>A   | Missense Mutation | ENPP5   | p.C378F  | ectonucleotide pyrophos  | 65 (0.00)  | 36 (0.44)  | 1.19 |
| 11-01 | Gp3 | g.chr14:74440651C>A  | Missense Mutation | ENTPD5  | p.C272F  | ectonucleoside triphospl | 19 (0.00)  | 32 (0.22)  | 0.58 |
| 11-01 | Gp3 | g.chr22:41569667A>T  | Missense Mutation | EP300   | p.N1553I | E1A binding protein p3   | 40 (0.00)  | 22 (0.23)  | 0.61 |
| 11-01 | Gp3 | g.chr22:41569703G>T  | Missense Mutation | EP300   | p.R1565M | E1A binding protein p3   | 55 (0.02)  | 53 (0.17)  | 0.45 |
| 11-01 | Gp3 | g.chr22:41569744G>A  | Missense Mutation | EP300   | p.D1579N | E1A binding protein p3   | 54 (0.00)  | 76 (0.14)  | 0.39 |
| 11-01 | Gp3 | g.chr12:132474647C>A | Missense Mutation | EP400   | p.Q850K  | E1A binding protein p4   | 132 (0.00) | 89 (0.22)  | 0.60 |
| 11-01 | Gp3 | g.chr1:29424320C>A   | Splice Site       | EPB41   | p.P729H  | erythrocyte membrane p   | 33 (0.00)  | 17 (0.47)  | 1.25 |
| 11-01 | Gp3 | g.chr20:34765969C>T  | Silent            | EPB41L1 | p.D146D  | erythrocyte membrane p   | 53 (0.00)  | 35 (0.20)  | 0.53 |
| 11-01 | Gp3 | g.chr20:34800270C>T  | Missense Mutation | EPB41L1 | p.T719I  | erythrocyte membrane p   | 57 (0.00)  | 36 (0.19)  | 0.52 |
| 11-01 | Gp3 | g.chr18:5407734G>A   | Splice Site       | EPB41L3 | p.S708L  | erythrocyte membrane p   | 25 (0.00)  | 19 (0.42)  | 1.12 |
| 11-01 | Gp3 | g.chr15:43503612A>T  | Splice Site       | EPB42   |          | erythrocyte membrane p   | 28 (0.00)  | 23 (0.35)  | 0.93 |
| 11-01 | Gp3 | g.chr10:32575769G>A  | Splice Site       | EPC1    | p.P415L  | enhancer of polycomb h   | 34 (0.00)  | 16 (0.31)  | 0.83 |
| 11-01 | Gp3 | g.chr18:43497747C>T  | Missense Mutation | EPG5    | p.G1046R | ectopic P-granules auto  | 89 (0.00)  | 53 (0.15)  | 0.40 |
| 11-01 | Gp3 | g.chr3:89499503C>G   | Missense Mutation | EPHA3   | p.I891M  | EPH receptor A3          | 73 (0.00)  | 35 (0.20)  | 0.53 |
| 11-01 | Gp3 | g.chr2:222294743G>T  | Silent            | EPHA4   | p.V875V  | EPH receptor A4          | 59 (0.00)  | 53 (0.25)  | 0.65 |
| 11-01 | Gp3 | g.chr3:96962983T>A   | Missense Mutation | EPHA6   | p.H486Q  | EPH receptor A6          | 120 (0.00) | 48 (0.17)  | 0.44 |
| 11-01 | Gp3 | g.chr6:94068009C>A   | Missense Mutation | EPHA7   | p.R318M  | EPH receptor A7          | 79 (0.00)  | 46 (0.39)  | 0.62 |
| 11-01 | Gp3 | g.chr1:92511122G>A   | Nonsense Mutation | EPHX4   | p.W170*  | epoxide hydrolase 4      | 94 (0.00)  | 52 (0.29)  | 0.77 |
| 11-01 | Gp3 | g.chr17:48614050G>T  | Missense Mutation | EPN3    | p.D45Y   | epsin 3                  | 23 (0.00)  | 37 (0.16)  | 0.43 |
| 11-01 | Gp3 | g.chr1:220153478G>A  | Silent            | EPRS    | p.D1220D | glutamyl-prolyl-tRNA s   | 86 (0.00)  | 102 (0.22) | 0.58 |
| 11-01 | Gp3 | g.chr2:26590072C>A   | Missense Mutation | EPT1    | p.F98L   | ethanolaminephosphotr    | 75 (0.00)  | 88 (0.19)  | 0.52 |
| 11-01 | Gp3 | g.chr17:56276960C>A  | Missense Mutation | EPX     | p.L448M  | eosinophil peroxidase    | 62 (0.00)  | 31 (0.29)  | 0.77 |
| 11-01 | Gp3 | g.chr17:27184975G>A  | Missense Mutation | ERAL1   | p.G170S  | Era-like 12S mitochond   | 73 (0.00)  | 45 (0.24)  | 0.65 |
| 11-01 | Gp3 | g.chr5:96228073G>T   | Silent            | ERAP2   | p.T347T  | endoplasmic reticulum    | 49 (0.00)  | 25 (0.24)  | 0.64 |
| 11-01 | Gp3 | g.chr17:37883113C>T  | Missense Mutation | ERBB2   | p.R1006C | v-erb-b2 avian erythrobl | 46 (0.00)  | 66 (0.15)  | 0.40 |
| 11-01 | Gp3 | g.chr12:56489522T>C  | Missense Mutation | ERBB3   | p.F663L  | v-erb-b2 avian erythrobl | 61 (0.00)  | 104 (0.16) | 0.44 |
| 11-01 | Gp3 | g.chr2:212288940C>T  | Missense Mutation | ERBB4   | p.G936R  | v-erb-b2 avian erythrobl | 28 (0.00)  | 17 (0.35)  | 0.94 |
| 11-01 | Gp3 | g.chr16:14020486C>A  | Missense Mutation | ERCC4   | p.R153S  | excision repair cross-co | 47 (0.00)  | 64 (0.16)  | 0.42 |



|       |     |                     |                   |                   |          |                                      |           |      |
|-------|-----|---------------------|-------------------|-------------------|----------|--------------------------------------|-----------|------|
| 11-01 | Gp3 | g.chr10:50724167C>A | Missense Mutation | ERCC6-PGBDp.V800F |          | ERCC6-PGBD3 readthr 36 (0.00)        | 38 (0.16) | 0.42 |
| 11-01 | Gp3 | g.chr21:39764199C>T | Intron            | ERG               |          | v-ets avian erythroblastc 43 (0.00)  | 51 (0.16) | 0.42 |
| 11-01 | Gp3 | g.chr21:39764703C>A | Intron            | ERG               |          | v-ets avian erythroblastc 52 (0.00)  | 32 (0.19) | 0.50 |
| 11-01 | Gp3 | g.chr21:39786077T>A | Intron            | ERG               |          | v-ets avian erythroblastc 84 (0.00)  | 41 (0.17) | 0.46 |
| 11-01 | Gp3 | g.chr21:39786981C>A | Intron            | ERG               |          | v-ets avian erythroblastc 94 (0.00)  | 40 (0.20) | 0.53 |
| 11-01 | Gp3 | g.chr21:39791180G>A | Intron            | ERG               |          | v-ets avian erythroblastc 60 (0.00)  | 46 (0.17) | 0.46 |
| 11-01 | Gp3 | g.chr21:39795958C>T | Intron            | ERG               |          | v-ets avian erythroblastc 58 (0.00)  | 43 (0.16) | 0.43 |
| 11-01 | Gp3 | g.chr21:39809690T>A | Intron            | ERG               |          | v-ets avian erythroblastc 104 (0.00) | 92 (0.21) | 0.55 |
| 11-01 | Gp3 | g.chr21:39828788C>A | Intron            | ERG               |          | v-ets avian erythroblastc 53 (0.00)  | 50 (0.28) | 0.75 |
| 11-01 | Gp3 | g.chr21:39837524G>C | Intron            | ERG               |          | v-ets avian erythroblastc 15 (0.00)  | 22 (0.32) | 0.85 |
| 11-01 | Gp3 | g.chr21:39846893C>A | Intron            | ERG               |          | v-ets avian erythroblastc 83 (0.00)  | 41 (0.20) | 0.52 |
| 11-01 | Gp3 | g.chr21:39850483C>G | Intron            | ERG               |          | v-ets avian erythroblastc 75 (0.00)  | 30 (0.20) | 0.53 |
| 11-01 | Gp3 | g.chr21:39895293C>T | Intron            | ERG               |          | v-ets avian erythroblastc 41 (0.00)  | 14 (0.71) | 0.81 |
| 11-01 | Gp3 | g.chr21:39983506G>A | Intron            | ERG               |          | v-ets avian erythroblastc 98 (0.00)  | 94 (0.44) | 0.50 |
| 11-01 | Gp3 | g.chr21:39997450C>A | Intron            | ERG               |          | v-ets avian erythroblastc 72 (0.00)  | 14 (0.57) | 0.65 |
| 11-01 | Gp3 | g.chr21:40014991A>T | Intron            | ERG               |          | v-ets avian erythroblastc 117 (0.00) | 37 (0.35) | 0.40 |
| 11-01 | Gp3 | g.chr21:40019201C>G | Intron            | ERG               |          | v-ets avian erythroblastc 71 (0.00)  | 18 (0.33) | 0.38 |
| 11-01 | Gp3 | g.chr1:44687268G>A  | Nonsense Mutation | ERI3              | p.R326*  | ERI1 exoribonuclease f 30 (0.00)     | 15 (0.47) | 1.24 |
| 11-01 | Gp3 | g.chr7:64453300C>T  | Silent            | ERV3-1            | p.T35T   | endogenous retrovirus g 64 (0.00)    | 38 (0.26) | 0.70 |
| 11-01 | Gp3 | g.chr6:11104920C>A  | Silent            | ERVFRD-1          | p.R208R  | endogenous retrovirus g 60 (0.00)    | 36 (0.17) | 0.44 |
| 11-01 | Gp3 | g.chr3:138187699C>G | Silent            | ESYT3             | p.A470A  | extended synaptotagmin 114 (0.00)    | 69 (0.14) | 0.39 |
| 11-01 | Gp3 | g.chr3:138189862G>A | Silent            | ESYT3             | p.V578V  | extended synaptotagmin 55 (0.00)     | 39 (0.18) | 0.48 |
| 11-01 | Gp3 | g.chr1:93160923G>T  | Missense Mutation | EVI5              | p.L329I  | ecotropic viral integratic 78 (0.00) | 87 (0.20) | 0.52 |
| 11-01 | Gp3 | g.chr17:74004276C>A | Missense Mutation | EVPL              | p.E1670D | envoplakin 28 (0.00)                 | 30 (0.17) | 0.44 |
| 11-01 | Gp3 | g.chr22:29692283G>A | Missense Mutation | EWSR1             | p.G412R  | EWS RNA-binding prot 56 (0.00)       | 51 (0.43) | 0.69 |
| 11-01 | Gp3 | g.chr15:41482158C>G | Missense Mutation | EXD1              | p.A345P  | exonuclease 3'-5' domai 39 (0.00)    | 71 (0.15) | 0.41 |
| 11-01 | Gp3 | g.chr15:41482279C>G | Silent            | EXD1              | p.L304L  | exonuclease 3'-5' domai 34 (0.03)    | 29 (0.31) | 0.83 |
| 11-01 | Gp3 | g.chr6:486749G>A    | Silent            | EXOC2             | p.L899L  | exocyst complex compo 80 (0.00)      | 63 (0.32) | 0.85 |
| 11-01 | Gp3 | g.chr7:133689666G>A | Splice Site       | EXOC4             | p.V784I  | exocyst complex compo 36 (0.00)      | 20 (0.35) | 0.93 |
| 11-01 | Gp3 | g.chr7:133749271C>A | Missense Mutation | EXOC4             | p.T972N  | exocyst complex compo 83 (0.00)      | 41 (0.15) | 0.39 |
| 11-01 | Gp3 | g.chr14:57676467G>C | Missense Mutation | EXOC5             | p.Q586E  | exocyst complex compo 72 (0.00)      | 25 (0.24) | 0.64 |
| 11-01 | Gp3 | g.chr2:72945249C>T  | Missense Mutation | EXOC6B            | p.E218K  | exocyst complex compo 72 (0.00)      | 57 (0.26) | 0.40 |
| 11-01 | Gp3 | g.chr1:231471790G>A | Missense Mutation | EXOC8             | p.H564Y  | exocyst complex compo 49 (0.00)      | 37 (0.24) | 0.50 |
| 11-01 | Gp3 | g.chr3:38542937G>T  | Silent            | EXOG              | p.G85G   | endo/exonuclease (5'-3') 26 (0.00)   | 41 (0.24) | 0.65 |
| 11-01 | Gp3 | g.chr10:99197027G>A | Silent            | EXOSC1            | p.S134S  | exosome component 1 25 (0.00)        | 13 (0.38) | 1.03 |

|       |     |                      |                   |          |          |                           |            |           |      |
|-------|-----|----------------------|-------------------|----------|----------|---------------------------|------------|-----------|------|
| 11-01 | Gp3 | g.chr1:11129788C>A   | Splice Site       | EXOSC10  |          | exosome component 10      | 40 (0.00)  | 61 (0.38) | 1.01 |
| 11-01 | Gp3 | g.chr9:37783940C>T   | Missense Mutation | EXOSC3   | p.A149T  | exosome component 3       | 105 (0.00) | 47 (0.26) | 0.39 |
| 11-01 | Gp3 | g.chr3:45038655C>T   | Missense Mutation | EXOSC7   | p.R111W  | exosome component 7       | 37 (0.00)  | 64 (0.50) | 1.33 |
| 11-01 | Gp3 | g.chr11:108382224C>A | Missense Mutation | EXPH5    | p.R1337M | exophilin 5               | 57 (0.00)  | 29 (0.21) | 0.55 |
| 11-01 | Gp3 | g.chr11:108383794G>T | Missense Mutation | EXPH5    | p.Q814K  | exophilin 5               | 61 (0.00)  | 33 (0.15) | 0.40 |
| 11-01 | Gp3 | g.chr11:44193165G>C  | Missense Mutation | EXT2     | p.R393P  | exostosin glycosyltransf  | 47 (0.00)  | 20 (0.25) | 0.67 |
| 11-01 | Gp3 | g.chr11:44219484C>T  | Missense Mutation | EXT2     | p.R471W  | exostosin glycosyltransf  | 36 (0.00)  | 31 (0.16) | 0.43 |
| 11-01 | Gp3 | g.chr11:44219504C>T  | Silent            | EXT2     | p.S477S  | exostosin glycosyltransf  | 47 (0.00)  | 49 (0.20) | 0.54 |
| 11-01 | Gp3 | g.chr1:101342383G>A  | Silent            | EXTL2    | p.T157T  | exostosin-like glycosyltr | 96 (0.00)  | 45 (0.27) | 0.71 |
| 11-01 | Gp3 | g.chr1:28319954C>A   | Silent            | EYA3     | p.R420R  | EYA transcriptional coa   | 24 (0.00)  | 27 (0.26) | 0.69 |
| 11-01 | Gp3 | g.chr6:66205171G>T   | Missense Mutation | EYS      | p.L45I   | eyes shut homolog (Dro    | 115 (0.00) | 71 (0.14) | 0.38 |
| 11-01 | Gp3 | g.chr7:148512620G>C  | Missense Mutation | EZH2     | p.C508W  | enhancer of zeste 2 poly  | 54 (0.00)  | 59 (0.17) | 0.45 |
| 11-01 | Gp3 | g.chr5:76029110C>A   | Missense Mutation | F2R      | p.L354I  | coagulation factor II (th | 59 (0.00)  | 48 (0.25) | 0.67 |
| 11-01 | Gp3 | g.chr5:75914401G>A   | Missense Mutation | F2RL2    | p.P22L   | coagulation factor II (th | 65 (0.00)  | 42 (0.19) | 0.51 |
| 11-01 | Gp3 | g.chr2:88425713C>A   | Missense Mutation | FABP1    | p.M74I   | fatty acid binding protei | 92 (0.00)  | 41 (0.22) | 0.59 |
| 11-01 | Gp3 | g.chr5:159656588G>A  | Silent            | FABP6    | p.E8E    | fatty acid binding protei | 95 (0.00)  | 79 (0.19) | 0.51 |
| 11-01 | Gp3 | g.chr8:82373740C>A   | Nonsense Mutation | FABP9    | p.G7*    | fatty acid binding protei | 47 (0.02)  | 24 (0.29) | 0.97 |
| 11-01 | Gp3 | g.chr6:170627546T>A  | Nonsense Mutation | FAM120B  | p.C356*  | family with sequence si   | 92 (0.00)  | 87 (0.18) | 0.49 |
| 11-01 | Gp3 | g.chrX:54117822G>A   | Missense Mutation | FAM120C  | p.R784C  | family with sequence si   | 19 (0.00)  | 41 (0.51) | 0.85 |
| 11-01 | Gp3 | g.chr13:51854790G>C  | Missense Mutation | FAM124A  | p.A347P  | family with sequence si   | 32 (0.00)  | 34 (0.15) | 0.39 |
| 11-01 | Gp3 | g.chr13:51854803C>G  | Missense Mutation | FAM124A  | p.P351R  | family with sequence si   | 40 (0.00)  | 35 (0.14) | 0.38 |
| 11-01 | Gp3 | g.chr2:201862207G>A  | Missense Mutation | FAM126B  | p.P196L  | family with sequence si   | 17 (0.00)  | 31 (0.32) | 0.86 |
| 11-01 | Gp3 | g.chr1:184859260G>A  | Missense Mutation | FAM129A  | p.H139Y  | family with sequence si   | 113 (0.00) | 67 (0.21) | 0.56 |
| 11-01 | Gp3 | g.chr2:220043714G>T  | Missense Mutation | FAM134A  | p.D118Y  | family with sequence si   | 59 (0.00)  | 30 (0.37) | 0.98 |
| 11-01 | Gp3 | g.chr5:16475174C>A   | Silent            | FAM134B  | p.T249T  | family with sequence si   | 40 (0.00)  | 25 (0.24) | 0.64 |
| 11-01 | Gp3 | g.chr17:40738798C>T  | Silent            | FAM134C  | p.K163K  | family with sequence si   | 60 (0.00)  | 44 (0.16) | 0.42 |
| 11-01 | Gp3 | g.chr4:89653185G>A   | Silent            | FAM13A   | p.D937D  | family with sequence si   | 55 (0.00)  | 38 (0.42) | 1.12 |
| 11-01 | Gp3 | g.chr10:61083806G>A  | Missense Mutation | FAM13C   | p.H129Y  | family with sequence si   | 55 (0.00)  | 52 (0.33) | 0.87 |
| 11-01 | Gp3 | g.chr4:187088396C>A  | Missense Mutation | FAM149A  | p.T452K  | family with sequence si   | 49 (0.00)  | 28 (0.29) | 0.76 |
| 11-01 | Gp3 | g.chr13:108518248C>A | Nonsense Mutation | FAM155A  | p.E233*  | family with sequence si   | 19 (0.00)  | 27 (0.78) | 2.07 |
| 11-01 | Gp3 | g.chr10:116602841G>A | Silent            | FAM160B1 | p.L224L  | family with sequence si   | 114 (0.01) | 60 (0.18) | 0.49 |
| 11-01 | Gp3 | g.chr8:21956798G>A   | Missense Mutation | FAM160B2 | p.V360I  | family with sequence si   | 28 (0.00)  | 25 (0.72) | 1.07 |
| 11-01 | Gp3 | g.chr2:62065707C>A   | Missense Mutation | FAM161A  | p.A573S  | family with sequence si   | 24 (0.00)  | 26 (0.27) | 0.72 |
| 11-01 | Gp3 | g.chr1:179783273C>A  | Silent            | FAM163A  | p.G151G  | family with sequence si   | 85 (0.00)  | 92 (0.14) | 0.38 |
| 11-01 | Gp3 | g.chr10:15255020G>C  | Missense Mutation | FAM171A1 | p.A856G  | family with sequence si   | 118 (0.00) | 62 (0.16) | 0.43 |

|       |     |                      |                   |          |          |                                      |           |      |
|-------|-----|----------------------|-------------------|----------|----------|--------------------------------------|-----------|------|
| 11-01 | Gp3 | g.chr6:119345170C>A  | Missense Mutation | FAM184A  | p.C203F  | family with sequence si160 (0.00)    | 21 (0.43) | 0.66 |
| 11-01 | Gp3 | g.chr10:128936223G>A | Missense Mutation | FAM196A  | p.P440S  | family with sequence si185 (0.00)    | 28 (0.36) | 0.95 |
| 11-01 | Gp3 | g.chr10:128974605C>T | Missense Mutation | FAM196A  | p.E19K   | family with sequence si129 (0.00)    | 70 (0.53) | 1.41 |
| 11-01 | Gp3 | g.chr4:159052012A>T  | Silent            | FAM198B  | p.V426V  | family with sequence si123 (0.00)    | 13 (0.38) | 1.03 |
| 11-01 | Gp3 | g.chr3:68587949G>A   | Missense Mutation | FAM19A1  | p.C101Y  | family with sequence si1103 (0.00)   | 82 (0.18) | 0.49 |
| 11-01 | Gp3 | g.chr9:34726829G>A   | Silent            | FAM205A  | p.S136S  | family with sequence si136 (0.00)    | 11 (0.55) | 1.45 |
| 11-01 | Gp3 | g.chr9:34835782C>A   | RNA               | FAM205B  |          | family with sequence si117 (0.00)    | 71 (0.25) | 0.68 |
| 11-01 | Gp3 | g.chr10:5799546G>A   | Missense Mutation | FAM208B  | p.G2266R | family with sequence si196 (0.00)    | 79 (0.23) | 0.61 |
| 11-01 | Gp3 | g.chr18:13671970C>A  | Missense Mutation | FAM210A  | p.G159V  | family with sequence si188 (0.00)    | 54 (0.19) | 0.49 |
| 11-01 | Gp3 | g.chr3:49841925C>T   | Silent            | FAM212A  | p.P123P  | family with sequence si132 (0.00)    | 56 (0.14) | 0.38 |
| 11-01 | Gp3 | g.chr20:58519289C>G  | Silent            | FAM217B  | p.L97L   | family with sequence si161 (0.00)    | 35 (0.29) | 0.76 |
| 11-01 | Gp3 | g.chr2:24406211G>C   | Missense Mutation | FAM228A  | p.E74Q   | family with sequence si175 (0.00)    | 32 (0.16) | 0.42 |
| 11-01 | Gp3 | g.chr6:116833356C>T  | Missense Mutation | FAM26E   | p.T166I  | family with sequence si143 (0.00)    | 19 (0.84) | 1.31 |
| 11-01 | Gp3 | g.chr7:121011355C>T  | Splice Site       | FAM3C    | p.V91I   | family with sequence si127 (0.00)    | 11 (0.82) | 2.18 |
| 11-01 | Gp3 | g.chr6:24875943C>G   | Missense Mutation | FAM65B   | p.S26T   | family with sequence si188 (0.00)    | 66 (0.21) | 0.57 |
| 11-01 | Gp3 | g.chr20:49209612G>A  | Silent            | FAM65C   | p.V774V  | family with sequence si183 (0.00)    | 59 (0.20) | 0.54 |
| 11-01 | Gp3 | g.chr8:11986063C>T   | RNA               | FAM66D   |          | family with sequence si154 (0.01)    | 38 (0.32) | 0.47 |
| 11-01 | Gp3 | g.chr1:93309107G>T   | Missense Mutation | FAM69A   | p.L374I  | family with sequence si184 (0.00)    | 47 (0.19) | 0.51 |
| 11-01 | Gp3 | g.chr18:72113869T>C  | Missense Mutation | FAM69C   | p.E283G  | family with sequence si137 (0.00)    | 23 (0.39) | 1.04 |
| 11-01 | Gp3 | g.chr6:54805935G>A   | Silent            | FAM83B   | p.E722E  | family with sequence si152 (0.00)    | 31 (0.16) | 0.43 |
| 11-01 | Gp3 | g.chr20:33874555C>T  | Missense Mutation | FAM83C   | p.G676D  | family with sequence si144 (0.00)    | 54 (0.17) | 0.44 |
| 11-01 | Gp3 | g.chr20:33874600C>T  | Missense Mutation | FAM83C   | p.R661H  | family with sequence si120 (0.00)    | 18 (0.28) | 0.74 |
| 11-01 | Gp3 | g.chr20:37580315C>G  | Missense Mutation | FAM83D   | p.H334D  | family with sequence si1123 (0.00)   | 92 (0.17) | 0.46 |
| 11-01 | Gp3 | g.chr11:67564291G>A  | RNA               | FAM86C2P |          | family with sequence si175 (0.00)    | 74 (0.16) | 0.43 |
| 11-01 | Gp3 | g.chr3:75476963C>G   | RNA               | FAM86DP  |          | family with sequence si157 (0.00)    | 21 (0.24) | 0.63 |
| 11-01 | Gp3 | g.chr12:8376747C>A   | Missense Mutation | FAM90A1  | p.C63F   | family with sequence si193 (0.00)    | 80 (0.16) | 0.43 |
| 11-01 | Gp3 | g.chr9:35078600A>T   | Splice Site       | FANCG    |          | Fanconi anemia, comple29 (0.00)      | 32 (0.16) | 0.42 |
| 11-01 | Gp3 | g.chr9:35078627C>A   | Missense Mutation | FANCG    | p.Q94H   | Fanconi anemia, comple27 (0.00)      | 38 (0.21) | 0.56 |
| 11-01 | Gp3 | g.chr15:89849279G>T  | Nonsense Mutation | FANCI    | p.E1131* | Fanconi anemia, comple65 (0.00)      | 48 (0.25) | 0.67 |
| 11-01 | Gp3 | g.chr10:127685183G>A | Missense Mutation | FANK1    | p.G149R  | fibronectin type III and :100 (0.00) | 54 (0.22) | 0.59 |
| 11-01 | Gp3 | g.chr2:163031454G>A  | Missense Mutation | FAP      | p.S631L  | fibroblast activation pro 57 (0.00)  | 26 (0.19) | 0.51 |
| 11-01 | Gp3 | g.chr2:242380806C>T  | Missense Mutation | FARP2    | p.P416S  | FERM, RhoGEF and pl129 (0.00)        | 25 (0.24) | 0.64 |
| 11-01 | Gp3 | g.chr5:7867160T>A    | Missense Mutation | FASTKD3  | p.H346L  | FAST kinase domains 3 56 (0.00)      | 57 (0.16) | 0.42 |
| 11-01 | Gp3 | g.chr4:187524720C>T  | Missense Mutation | FAT1     | p.E3654K | FAT atypical cadherin 1 77 (0.00)    | 56 (0.18) | 0.48 |
| 11-01 | Gp3 | g.chr4:187532632G>T  | Missense Mutation | FAT1     | p.A3254E | FAT atypical cadherin 1 122 (0.00)   | 36 (0.17) | 0.44 |

|       |     |                      |                   |        |          |                                    |            |      |
|-------|-----|----------------------|-------------------|--------|----------|------------------------------------|------------|------|
| 11-01 | Gp3 | g.chr4:187538347G>T  | Missense Mutation | FAT1   | p.P2963T | FAT atypical cadherin 186 (0.00)   | 35 (0.14)  | 0.38 |
| 11-01 | Gp3 | g.chr4:187627754G>T  | Silent            | FAT1   | p.G1076G | FAT atypical cadherin 159 (0.00)   | 20 (0.30)  | 0.80 |
| 11-01 | Gp3 | g.chr11:92088031C>G  | Nonsense Mutation | FAT3   | p.S768*  | FAT atypical cadherin 3208 (0.00)  | 95 (0.24)  | 0.65 |
| 11-01 | Gp3 | g.chr11:92523109G>A  | Splice Site       | FAT3   | p.V1296I | FAT atypical cadherin 366 (0.00)   | 51 (0.18)  | 0.47 |
| 11-01 | Gp3 | g.chr11:92568145C>T  | Silent            | FAT3   | p.V3177V | FAT atypical cadherin 369 (0.00)   | 38 (0.16)  | 0.42 |
| 11-01 | Gp3 | g.chr4:126329650G>A  | Missense Mutation | FAT4   | p.G1874E | FAT atypical cadherin 445 (0.00)   | 62 (0.16)  | 0.43 |
| 11-01 | Gp3 | g.chr4:126336801C>T  | Missense Mutation | FAT4   | p.T2228I | FAT atypical cadherin 447 (0.00)   | 47 (0.21)  | 0.57 |
| 11-01 | Gp3 | g.chr4:126373542C>A  | Missense Mutation | FAT4   | p.L3791I | FAT atypical cadherin 459 (0.00)   | 32 (0.19)  | 0.50 |
| 11-01 | Gp3 | g.chr6:99771429C>T   | Silent            | FAXC   | p.T238T  | failed axon connections 44 (0.00)  | 11 (0.45)  | 0.71 |
| 11-01 | Gp3 | g.chr17:73922445C>A  | Missense Mutation | FBF1   | p.D206Y  | Fas (TNFRSF6) binding40 (0.00)     | 37 (0.16)  | 0.43 |
| 11-01 | Gp3 | g.chr15:48703488C>T  | Missense Mutation | FBN1   | p.S2772N | fibrillin 1 124 (0.00)             | 91 (0.15)  | 0.41 |
| 11-01 | Gp3 | g.chr15:48704809C>T  | Missense Mutation | FBN1   | p.R2728K | fibrillin 1 42 (0.00)              | 23 (0.57)  | 1.51 |
| 11-01 | Gp3 | g.chr15:48704920C>T  | Missense Mutation | FBN1   | p.G2691D | fibrillin 1 79 (0.00)              | 44 (0.57)  | 1.52 |
| 11-01 | Gp3 | g.chr15:48707842C>T  | Missense Mutation | FBN1   | p.D2648N | fibrillin 1 48 (0.00)              | 24 (0.21)  | 0.56 |
| 11-01 | Gp3 | g.chr15:48734035C>T  | Missense Mutation | FBN1   | p.E2016K | fibrillin 1 120 (0.00)             | 118 (0.32) | 0.86 |
| 11-01 | Gp3 | g.chr5:127624945C>T  | Splice Site       | FBN2   |          | fibrillin 2 50 (0.00)              | 56 (0.20)  | 0.52 |
| 11-01 | Gp3 | g.chr5:127648481C>T  | Missense Mutation | FBN2   | p.R1575H | fibrillin 2 145 (0.00)             | 100 (0.21) | 0.56 |
| 11-01 | Gp3 | g.chr19:9922296G>A   | Missense Mutation | FBXL12 | p.P62S   | F-box and leucine-rich r 19 (0.00) | 66 (0.15)  | 0.40 |
| 11-01 | Gp3 | g.chr3:33415133C>T   | Silent            | FBXL2  | p.G173G  | F-box and leucine-rich r 38 (0.00) | 18 (0.50)  | 1.33 |
| 11-01 | Gp3 | g.chr3:33415166G>T   | Silent            | FBXL2  | p.L184L  | F-box and leucine-rich r 32 (0.00) | 18 (0.44)  | 1.19 |
| 11-01 | Gp3 | g.chr12:117612508G>T | Nonsense Mutation | FBXO21 | p.C229*  | F-box protein 21 39 (0.00)         | 45 (0.18)  | 0.47 |
| 11-01 | Gp3 | g.chr7:100198173G>T  | Missense Mutation | FBXO24 | p.C465F  | F-box protein 24 17 (0.00)         | 26 (0.46)  | 1.23 |
| 11-01 | Gp3 | g.chr6:146125831G>A  | Missense Mutation | FBXO30 | p.P571S  | F-box protein 30 72 (0.00)         | 56 (0.14)  | 0.38 |
| 11-01 | Gp3 | g.chr6:146126284G>A  | Missense Mutation | FBXO30 | p.L420F  | F-box protein 30 76 (0.00)         | 48 (0.25)  | 0.67 |
| 11-01 | Gp3 | g.chr6:146126308C>A  | Nonsense Mutation | FBXO30 | p.E412*  | F-box protein 30 81 (0.00)         | 45 (0.16)  | 0.41 |
| 11-01 | Gp3 | g.chr6:146127381G>A  | Missense Mutation | FBXO30 | p.P54L   | F-box protein 30 123 (0.00)        | 89 (0.15)  | 0.39 |
| 11-01 | Gp3 | g.chr1:16632321G>A   | Missense Mutation | FBXO42 | p.P115L  | F-box protein 42 45 (0.00)         | 21 (0.24)  | 0.63 |
| 11-01 | Gp3 | g.chr6:153296361C>A  | Nonsense Mutation | FBXO5  | p.E167*  | F-box protein 5 46 (0.00)          | 39 (0.33)  | 0.89 |
| 11-01 | Gp3 | g.chr22:32894131C>T  | Splice Site       | FBXO7  | p.L395L  | F-box protein 7 53 (0.00)          | 23 (0.26)  | 0.70 |
| 11-01 | Gp3 | g.chr6:52957272A>T   | Missense Mutation | FBXO9  | p.R233S  | F-box protein 9 85 (0.01)          | 34 (0.18)  | 0.47 |
| 11-01 | Gp3 | g.chr17:18668054G>A  | Splice Site       | FBXW10 |          | F-box and WD repeat d 59 (0.02)    | 33 (0.42)  | 1.13 |
| 11-01 | Gp3 | g.chr17:18673325G>T  | Missense Mutation | FBXW10 | p.G645W  | F-box and WD repeat d 66 (0.00)    | 28 (0.29)  | 0.76 |
| 11-01 | Gp3 | g.chr1:161512880C>T  | Silent            | FCGR3A | p.V229V  | Fc fragment of IgG, low 85 (0.01)  | 46 (0.35)  | 0.93 |
| 11-01 | Gp3 | g.chr19:17887068C>A  | Missense Mutation | FCHO1  | p.R399S  | FCH domain only 1 50 (0.00)        | 54 (0.15)  | 0.40 |
| 11-01 | Gp3 | g.chr1:157736746C>T  | Missense Mutation | FCRL2  | p.R393K  | Fc receptor-like 2 36 (0.00)       | 54 (0.33)  | 0.89 |

|       |     |                      |                   |        |          |                           |             |            |      |
|-------|-----|----------------------|-------------------|--------|----------|---------------------------|-------------|------------|------|
| 11-01 | Gp3 | g.chr1:161680656C>A  | Silent            | FCRLA  | p.V79V   | Fc receptor-like A        | 66 (0.00)   | 36 (0.17)  | 0.44 |
| 11-01 | Gp3 | g.chr18:55221632G>T  | Missense Mutation | FECH   | p.P313T  | ferrochelata              | 194 (0.00)  | 73 (0.15)  | 0.40 |
| 11-01 | Gp3 | g.chr2:97361570C>A   | RNA               | FER1L5 |          | fer-1-like family membe   | 29 (0.00)   | 21 (0.24)  | 0.63 |
| 11-01 | Gp3 | g.chr2:97370094G>A   | RNA               | FER1L5 |          | fer-1-like family membe   | 99 (0.01)   | 59 (0.15)  | 0.41 |
| 11-01 | Gp3 | g.chr8:124987502G>A  | Silent            | FER1L6 | p.L213L  | fer-1-like family membe   | 109 (0.00)  | 36 (0.17)  | 0.44 |
| 11-01 | Gp3 | g.chr8:124993043C>G  | Missense Mutation | FER1L6 | p.P468A  | fer-1-like family membe   | 65 (0.00)   | 45 (0.18)  | 0.47 |
| 11-01 | Gp3 | g.chr8:125047531G>A  | Missense Mutation | FER1L6 | p.R767Q  | fer-1-like family membe   | 58 (0.00)   | 28 (0.21)  | 0.57 |
| 11-01 | Gp3 | g.chr3:186370296C>T  | Missense Mutation | FETUB  | p.S277F  | fetuin B                  | 66 (0.00)   | 33 (0.21)  | 0.57 |
| 11-01 | Gp3 | g.chr11:125318455C>G | Missense Mutation | FEZ1   | p.A369P  | fasciculation and elonga  | 27 (0.00)   | 15 (0.53)  | 1.42 |
| 11-01 | Gp3 | g.chr2:36805951G>C   | Missense Mutation | FEZ2   | p.A231G  | fasciculation and elonga  | 65 (0.00)   | 26 (0.27)  | 0.72 |
| 11-01 | Gp3 | g.chr2:36805993G>T   | Nonsense Mutation | FEZ2   | p.S217*  | fasciculation and elonga  | 64 (0.00)   | 25 (0.24)  | 0.64 |
| 11-01 | Gp3 | g.chr4:155507801C>T  | Silent            | FGA    | p.E260E  | fibrinogen alpha chain    | 151 (0.00)  | 81 (0.15)  | 0.40 |
| 11-01 | Gp3 | g.chr4:155510029C>T  | Missense Mutation | FGA    | p.E94K   | fibrinogen alpha chain    | 71 (0.00)   | 75 (0.17)  | 0.46 |
| 11-01 | Gp3 | g.chr12:32764179G>A  | Missense Mutation | FGD4   | p.A546T  | FYVE, RhoGEF and PF       | 84 (0.00)   | 53 (0.23)  | 0.60 |
| 11-01 | Gp3 | g.chr3:14922096A>T   | Missense Mutation | FGD5   | p.R892S  | FYVE, RhoGEF and PF       | 37 (0.03)   | 17 (0.53)  | 1.41 |
| 11-01 | Gp3 | g.chr4:123813528C>A  | Missense Mutation | FGF2   | p.L149I  | fibroblast growth factor  | 39 (0.00)   | 28 (0.21)  | 0.57 |
| 11-01 | Gp3 | g.chr15:49716709G>A  | Missense Mutation | FGF7   | p.R72Q   | fibroblast growth factor  | 41 (0.00)   | 42 (0.19)  | 0.51 |
| 11-01 | Gp3 | g.chr4:155528065G>A  | Silent            | FGG    | p.F307F  | fibrinogen gamma chain    | 63 (0.00)   | 53 (0.17)  | 0.45 |
| 11-01 | Gp3 | g.chr8:17739581C>A   | Missense Mutation | FGL1   | p.E57D   | fibrinogen-like 1         | 44 (0.00)   | 22 (0.27)  | 0.41 |
| 11-01 | Gp3 | g.chr1:15692399G>T   | Nonsense Mutation | FHAD1  | p.E1020* | forkhead-associated (FH   | 39 (0.00)   | 24 (0.21)  | 0.56 |
| 11-01 | Gp3 | g.chr16:67271636C>A  | Silent            | FHOD1  | p.L226L  | formin homology 2 dom     | 83 (0.00)   | 28 (0.18)  | 0.48 |
| 11-01 | Gp3 | g.chr18:34156508G>A  | Splice Site       | FHOD3  | p.K202K  | formin homology 2 dom     | 36 (0.00)   | 35 (0.14)  | 0.38 |
| 11-01 | Gp3 | g.chr11:27016667G>A  | Silent            | FIBIN  | p.G198G  | fin bud initiation factor | 160 (0.02)  | 33 (0.27)  | 0.73 |
| 11-01 | Gp3 | g.chr2:164466811C>T  | Missense Mutation | FIGN   | p.A511T  | fidgetin                  | 37 (0.00)   | 16 (0.44)  | 1.17 |
| 11-01 | Gp3 | g.chr2:164467783G>T  | Missense Mutation | FIGN   | p.P187T  | fidgetin                  | 89 (0.00)   | 68 (0.16)  | 0.43 |
| 11-01 | Gp3 | g.chr7:50514217T>C   | Missense Mutation | FIGNL1 | p.R257G  | fidgetin-like 1           | 78 (0.00)   | 46 (0.17)  | 0.46 |
| 11-01 | Gp3 | g.chr6:76023092G>A   | Missense Mutation | FILIP1 | p.T819M  | filamin A interacting pro | 124 (0.01)  | 105 (0.21) | 0.56 |
| 11-01 | Gp3 | g.chr6:76023689T>A   | Missense Mutation | FILIP1 | p.E620V  | filamin A interacting pro | 120 (0.00)  | 111 (0.43) | 1.15 |
| 11-01 | Gp3 | g.chr9:115936836C>T  | Missense Mutation | FKBP15 | p.A751T  | FK506 binding protein     | 1103 (0.00) | 68 (0.18)  | 0.47 |
| 11-01 | Gp3 | g.chr9:115945138G>T  | Missense Mutation | FKBP15 | p.Q608K  | FK506 binding protein     | 181 (0.01)  | 83 (0.63)  | 1.67 |
| 11-01 | Gp3 | g.chr12:2907894G>A   | Missense Mutation | FKBP4  | p.G139E  | FK506 binding protein     | 458 (0.00)  | 40 (0.28)  | 0.73 |
| 11-01 | Gp3 | g.chr7:72744243G>A   | Missense Mutation | FKBP6  | p.G119E  | FK506 binding protein     | 63 (0.00)   | 32 (0.16)  | 0.42 |
| 11-01 | Gp3 | g.chr7:33014262G>A   | Silent            | FKBP9  | p.V85V   | FK506 binding protein     | 60 (0.00)   | 51 (0.20)  | 0.52 |
| 11-01 | Gp3 | g.chr7:55750402C>A   | RNA               | FKBP9L |          |                           | 205 (0.00)  | 134 (0.21) | 0.56 |
| 11-01 | Gp3 | g.chr9:108366630T>C  | Silent            | FKTN   | p.T168T  | fukutin                   | 33 (0.00)   | 35 (0.26)  | 0.69 |

|       |     |                     |                   |        |          |                             |            |            |      |
|-------|-----|---------------------|-------------------|--------|----------|-----------------------------|------------|------------|------|
| 11-01 | Gp3 | g.chr1:152324090G>A | Missense Mutation | FLG2   | p.H2058Y | filaggrin family member     | 74 (0.00)  | 79 (0.29)  | 0.78 |
| 11-01 | Gp3 | g.chr1:152325869G>A | Missense Mutation | FLG2   | p.H1465Y | filaggrin family member     | 34 (0.00)  | 33 (0.24)  | 0.65 |
| 11-01 | Gp3 | g.chr17:18149723C>T | Silent            | FLII   | p.K1035K | flightless I homolog (Dr    | 28 (0.00)  | 34 (0.18)  | 0.47 |
| 11-01 | Gp3 | g.chr7:128493049C>A | Missense Mutation | FLNC   | p.Q2058K | filamin C, gamma            | 20 (0.00)  | 29 (0.17)  | 0.46 |
| 11-01 | Gp3 | g.chr17:27209696C>T | Silent            | FLOT2  | p.V120V  | flotillin 2                 | 41 (0.00)  | 31 (0.16)  | 0.43 |
| 11-01 | Gp3 | g.chr13:28963952C>A | Missense Mutation | FLT1   | p.K650N  | fms-related tyrosine kin    | 68 (0.00)  | 44 (0.45)  | 1.21 |
| 11-01 | Gp3 | g.chr13:28601234G>A | Missense Mutation | FLT3   | p.P733L  | fms-related tyrosine kin    | 48 (0.00)  | 23 (0.48)  | 1.28 |
| 11-01 | Gp3 | g.chr1:146685000G>A | Missense Mutation | FMO5   | p.A121V  | flavin containing monoc     | 51 (0.00)  | 32 (0.16)  | 0.42 |
| 11-01 | Gp3 | g.chr2:216285423G>T | Silent            | FN1    | p.R550R  | fibronectin 1               | 53 (0.00)  | 54 (0.22)  | 0.59 |
| 11-01 | Gp3 | g.chr2:216288983C>A | Missense Mutation | FN1    | p.G368C  | fibronectin 1               | 77 (0.00)  | 21 (0.24)  | 0.63 |
| 11-01 | Gp3 | g.chr17:80684374G>T | Missense Mutation | FN3KRP | p.D163Y  | fructosamine 3 kinase re    | 70 (0.01)  | 54 (0.20)  | 0.54 |
| 11-01 | Gp3 | g.chr1:94000452G>T  | Missense Mutation | FNBP1L | p.G326V  | formin binding protein      | 143 (0.00) | 24 (0.38)  | 1.00 |
| 11-01 | Gp3 | g.chr1:109261570C>A | Missense Mutation | FNDC7  | p.T166K  | fibronectin type III dom    | 96 (0.00)  | 60 (0.15)  | 0.40 |
| 11-01 | Gp3 | g.chr17:33456448G>T | Missense Mutation | FNDC8  | p.W198L  | fibronectin type III dom    | 104 (0.00) | 52 (0.17)  | 0.46 |
| 11-01 | Gp3 | g.chr17:33456514C>T | Missense Mutation | FNDC8  | p.T220I  | fibronectin type III dom    | 75 (0.00)  | 42 (0.21)  | 0.57 |
| 11-01 | Gp3 | g.chr9:20720380C>T  | Splice Site       | FOCAD  | p.T45I   | focadhesin                  | 42 (0.00)  | 23 (0.26)  | 0.43 |
| 11-01 | Gp3 | g.chr9:20946722G>C  | Missense Mutation | FOCAD  | p.C1193S | focadhesin                  | 42 (0.00)  | 20 (0.40)  | 0.65 |
| 11-01 | Gp3 | g.chr9:20990351C>A  | Missense Mutation | FOCAD  | p.P1745Q | focadhesin                  | 24 (0.00)  | 15 (0.33)  | 0.54 |
| 11-01 | Gp3 | g.chr11:49207337G>A | Missense Mutation | FOLH1  | p.P237L  | folate hydrolase (prostat   | 85 (0.00)  | 45 (0.18)  | 0.47 |
| 11-01 | Gp3 | g.chr11:94039713T>A | Missense Mutation | FOLR4  | p.L58H   | folate receptor 4, delta (j | 77 (0.00)  | 96 (0.16)  | 0.42 |
| 11-01 | Gp3 | g.chr14:75747586G>A | Missense Mutation | FOS    | p.R201Q  | FBJ murine osteosarcon      | 61 (0.00)  | 32 (0.16)  | 0.42 |
| 11-01 | Gp3 | g.chr16:86612614C>T | Silent            | FOXL1  | p.N95N   | forkhead box L1             | 38 (0.00)  | 56 (0.27)  | 0.57 |
| 11-01 | Gp3 | g.chr14:89817129C>T | Nonsense Mutation | FOXN3  | p.W189*  | forkhead box N3             | 72 (0.00)  | 101 (0.16) | 0.42 |
| 11-01 | Gp3 | g.chr7:114174761G>A | Splice Site       | FOXP2  | p.Q86Q   | forkhead box P2             | 42 (0.00)  | 16 (0.31)  | 0.83 |
| 11-01 | Gp3 | g.chr4:79207678C>T  | Missense Mutation | FRAS1  | p.R507C  | Fraser extracellular matr   | 68 (0.00)  | 60 (0.17)  | 0.44 |
| 11-01 | Gp3 | g.chr4:79258838A>G  | Silent            | FRAS1  | p.P763P  | Fraser extracellular matr   | 95 (0.00)  | 60 (0.15)  | 0.40 |
| 11-01 | Gp3 | g.chr4:79410210G>A  | Silent            | FRAS1  | p.R2978R | Fraser extracellular matr   | 56 (0.00)  | 45 (0.49)  | 1.30 |
| 11-01 | Gp3 | g.chr4:79461864C>A  | Missense Mutation | FRAS1  | p.D3875E | Fraser extracellular matr   | 81 (0.00)  | 30 (0.17)  | 0.44 |
| 11-01 | Gp3 | g.chr9:14805106C>A  | Missense Mutation | FREM1  | p.V1107L | FRAS1 related extracell     | 50 (0.00)  | 29 (0.34)  | 0.54 |
| 11-01 | Gp3 | g.chr4:144619135C>T | Silent            | FREM3  | p.G898G  | FRAS1 related extracell     | 80 (0.00)  | 45 (0.20)  | 0.53 |
| 11-01 | Gp3 | g.chr10:13789767C>A | Missense Mutation | FRMD4A | p.A173S  | FERM domain containin       | 47 (0.00)  | 23 (0.35)  | 0.93 |
| 11-01 | Gp3 | g.chr3:69221044G>A  | Missense Mutation | FRMD4B | p.H1025Y | FERM domain containin       | 53 (0.00)  | 59 (0.22)  | 0.59 |
| 11-01 | Gp3 | g.chr15:44166607G>T | Missense Mutation | FRMD5  | p.H397N  | FERM domain containin       | 51 (0.00)  | 20 (0.25)  | 0.67 |
| 11-01 | Gp3 | g.chr10:49386184G>A | Missense Mutation | FRMPD2 | p.S934F  | FERM and PDZ domain         | 44 (0.02)  | 17 (0.53)  | 1.41 |
| 11-01 | Gp3 | g.chrX:12734578C>T  | Missense Mutation | FRMPD4 | p.P667L  | FERM and PDZ domain         | 94 (0.00)  | 39 (0.33)  | 0.56 |

|       |     |                      |                   |          |          |                                           |            |           |      |
|-------|-----|----------------------|-------------------|----------|----------|-------------------------------------------|------------|-----------|------|
| 11-01 | Gp3 | g.chr13:32605992C>A  | Silent            | FRY      | p.S20S   | furry homolog (Drosophila)                | 21 (0.00)  | 29 (0.17) | 0.46 |
| 11-01 | Gp3 | g.chr13:32753033G>A  | Missense Mutation | FRY      | p.V912I  | furry homolog (Drosophila)                | 103 (0.00) | 54 (0.22) | 0.59 |
| 11-01 | Gp3 | g.chr13:32808724G>A  | Silent            | FRY      | p.E1847E | furry homolog (Drosophila)                | 80 (0.00)  | 31 (0.16) | 0.43 |
| 11-01 | Gp3 | g.chr13:32811634C>T  | Missense Mutation | FRY      | p.R1977W | furry homolog (Drosophila)                | 89 (0.00)  | 50 (0.16) | 0.43 |
| 11-01 | Gp3 | g.chr13:32811969C>T  | Silent            | FRY      | p.L2088L | furry homolog (Drosophila)                | 33 (0.00)  | 12 (0.42) | 1.11 |
| 11-01 | Gp3 | g.chr9:108270952C>A  | Missense Mutation | FSD1L    | p.A65D   | fibronectin type III and IV               | 41 (0.00)  | 27 (0.41) | 1.09 |
| 11-01 | Gp3 | g.chr2:186657419C>A  | Missense Mutation | FSIP2    | p.H1852Q | fibrous sheath interactin                 | 28 (0.00)  | 33 (0.15) | 0.40 |
| 11-01 | Gp3 | g.chr2:186661467G>C  | Missense Mutation | FSIP2    | p.V3202L | fibrous sheath interactin                 | 109 (0.00) | 54 (0.20) | 0.54 |
| 11-01 | Gp3 | g.chr2:186669767C>T  | Missense Mutation | FSIP2    | p.S5245L | fibrous sheath interactin                 | 78 (0.00)  | 49 (0.27) | 0.71 |
| 11-01 | Gp3 | g.chr5:132535055G>C  | Missense Mutation | FSTL4    | p.A754G  | follistatin-like 4                        | 33 (0.00)  | 24 (0.21) | 0.56 |
| 11-01 | Gp3 | g.chr17:61897718G>T  | Missense Mutation | FTSJ3    | p.P718H  | FtsJ homolog 3 (E. coli)                  | 63 (0.00)  | 44 (0.32) | 0.85 |
| 11-01 | Gp3 | g.chr1:78430418C>A   | Missense Mutation | FUBP1    | p.M250I  | far upstream element (F)                  | 70 (0.00)  | 27 (0.22) | 0.59 |
| 11-01 | Gp3 | g.chr2:84518188G>T   | RNA               | FUNDC2P2 |          | FUN14 domain containing                   | 83 (0.00)  | 41 (0.27) | 0.41 |
| 11-01 | Gp3 | g.chr10:135169297C>A | Nonsense Mutation | FUOM     | p.E70*   | fucose mutarotase                         | 82 (0.00)  | 51 (0.22) | 0.58 |
| 11-01 | Gp3 | g.chr19:49206333G>A  | Silent            | FUT2     | p.E40E   | fucosyltransferase 2 (secretory)          | 42 (0.00)  | 17 (0.35) | 0.94 |
| 11-01 | Gp3 | g.chr17:7497631C>T   | Silent            | FXR2     | p.Q315Q  | fragile X mental retardation              | 52 (0.02)  | 40 (0.17) | 0.47 |
| 11-01 | Gp3 | g.chr5:39201934C>A   | Nonsense Mutation | FYB      | p.G377*  | FYN binding protein                       | 100 (0.00) | 32 (0.16) | 0.42 |
| 11-01 | Gp3 | g.chr7:90895452G>T   | Missense Mutation | FZD1     | p.W419C  | frizzled class receptor 1                 | 19 (0.00)  | 49 (0.22) | 0.60 |
| 11-01 | Gp3 | g.chr8:28360564C>T   | Missense Mutation | FZD3     | p.P12S   | frizzled class receptor 3                 | 88 (0.00)  | 30 (0.30) | 0.45 |
| 11-01 | Gp3 | g.chr11:86663436C>G  | Missense Mutation | FZD4     | p.C121S  | frizzled class receptor 4                 | 76 (0.00)  | 29 (0.21) | 0.55 |
| 11-01 | Gp3 | g.chr4:144381635G>A  | Missense Mutation | GAB1     | p.D630N  | GRB2-associated binding protein           | 114 (0.01) | 59 (0.27) | 0.72 |
| 11-01 | Gp3 | g.chr11:77938042C>T  | Missense Mutation | GAB2     | p.A226T  | GRB2-associated binding protein           | 29 (0.00)  | 28 (0.25) | 0.67 |
| 11-01 | Gp3 | g.chr9:101235575C>A  | Missense Mutation | GABBR2   | p.W284C  | gamma-aminobutyric acid receptor          | 35 (0.00)  | 17 (0.35) | 0.94 |
| 11-01 | Gp3 | g.chr9:101235579C>G  | Missense Mutation | GABBR2   | p.G283A  | gamma-aminobutyric acid receptor          | 35 (0.00)  | 15 (0.40) | 1.07 |
| 11-01 | Gp3 | g.chr1:151090641G>A  | Missense Mutation | GABPB2   | p.G419E  | GA binding protein transmembrane          | 68 (0.00)  | 62 (0.19) | 0.52 |
| 11-01 | Gp3 | g.chr5:161292730G>A  | Missense Mutation | GABRA1   | p.R64H   | gamma-aminobutyric acid receptor          | 33 (0.00)  | 12 (0.75) | 2.00 |
| 11-01 | Gp3 | g.chr5:160721162G>A  | Missense Mutation | GABRB2   | p.R489W  | gamma-aminobutyric acid receptor          | 38 (0.00)  | 39 (0.18) | 0.48 |
| 11-01 | Gp3 | g.chrX:151131090G>A  | Missense Mutation | GABRE    | p.S123F  | gamma-aminobutyric acid receptor          | 29 (0.00)  | 12 (0.50) | 0.83 |
| 11-01 | Gp3 | g.chr6:89910911C>T   | Missense Mutation | GABRR1   | p.D83N   | gamma-aminobutyric acid receptor          | 151 (0.00) | 25 (0.28) | 0.44 |
| 11-01 | Gp3 | g.chr6:89978911C>A   | Nonsense Mutation | GABRR2   | p.E111*  | gamma-aminobutyric acid receptor          | 71 (0.00)  | 39 (0.54) | 0.85 |
| 11-01 | Gp3 | g.chr10:26505798C>A  | Silent            | GAD2     | p.S20S   | glutamate decarboxylase                   | 17 (0.00)  | 22 (0.23) | 0.61 |
| 11-01 | Gp3 | g.chr14:88407804C>T  | Missense Mutation | GALC     | p.R590K  | galactosylceramidase                      | 105 (0.00) | 75 (0.28) | 0.75 |
| 11-01 | Gp3 | g.chr2:38908501G>T   | Missense Mutation | GALM     | p.G142V  | galactose mutarotase (alpha)              | 64 (0.00)  | 52 (0.42) | 1.13 |
| 11-01 | Gp3 | g.chr18:33267136G>C  | Silent            | GALNT1   | p.R282R  | polypeptide N-acetylgalactosyltransferase | 32 (0.00)  | 38 (0.24) | 0.63 |
| 11-01 | Gp3 | g.chr5:153677564G>A  | Missense Mutation | GALNT10  | p.R109Q  | polypeptide N-acetylgalactosyltransferase | 82 (0.00)  | 75 (0.16) | 0.43 |

|       |     |                      |                   |         |          |                                       |            |      |
|-------|-----|----------------------|-------------------|---------|----------|---------------------------------------|------------|------|
| 11-01 | Gp3 | g.chr9:101606469G>A  | Missense Mutation | GALNT12 | p.C479Y  | polypeptide N-acetylglal 29 (0.00)    | 25 (0.64)  | 1.71 |
| 11-01 | Gp3 | g.chr2:155158086C>T  | Silent            | GALNT13 | p.F380F  | polypeptide N-acetylglal 96 (0.00)    | 23 (0.30)  | 0.81 |
| 11-01 | Gp3 | g.chr12:51757937C>T  | Silent            | GALNT6  | p.K339K  | polypeptide N-acetylglal 21 (0.00)    | 23 (0.39)  | 1.04 |
| 11-01 | Gp3 | g.chr16:81388072G>A  | Silent            | GAN     | p.T115T  | gigaxonin 93 (0.00)                   | 40 (0.23)  | 0.48 |
| 11-01 | Gp3 | g.chr16:81388228G>C  | Silent            | GAN     | p.T167T  | gigaxonin 34 (0.00)                   | 16 (0.31)  | 0.66 |
| 11-01 | Gp3 | g.chr3:115439685G>A  | Missense Mutation | GAP43   | p.E261K  | growth associated protei94 (0.00)     | 75 (0.24)  | 0.64 |
| 11-01 | Gp3 | g.chr9:128088819A>G  | Silent            | GAPVD1  | p.G640G  | GTPase activating prote 58 (0.00)     | 35 (0.17)  | 0.46 |
| 11-01 | Gp3 | g.chr18:29890186G>A  | Silent            | GAREM   | p.Y121Y  | GRB2 associated, regul: 87 (0.00)     | 53 (0.36)  | 0.96 |
| 11-01 | Gp3 | g.chr21:34889371A>G  | Missense Mutation | GART    | p.F678L  | phosphoribosylglycinar 73 (0.00)      | 36 (0.25)  | 0.67 |
| 11-01 | Gp3 | g.chr7:99821598G>A   | Silent            | GATS    | p.G106G  | GATS, stromal antigen 75 (0.00)       | 95 (0.15)  | 0.39 |
| 11-01 | Gp3 | g.chr4:22749459G>A   | RNA               | GBA3    |          | glucosidase, beta, acid 377 (0.00)    | 33 (0.52)  | 1.37 |
| 11-01 | Gp3 | g.chr1:155186219T>G  | RNA               | GBAP1   |          | glucosidase, beta, acid p35 (0.00)    | 32 (0.25)  | 0.67 |
| 11-01 | Gp3 | g.chr1:155188682G>T  | RNA               | GBAP1   |          | glucosidase, beta, acid p24 (0.00)    | 34 (0.18)  | 0.47 |
| 11-01 | Gp3 | g.chr10:104117924C>T | Silent            | GBF1    | p.T256T  | golgi brefeldin A resista 149 (0.00)  | 134 (0.17) | 0.46 |
| 11-01 | Gp3 | g.chr1:89661045G>A   | Missense Mutation | GBP4    | p.H100Y  | guanylate binding protei36 (0.00)     | 21 (0.43)  | 1.14 |
| 11-01 | Gp3 | g.chr1:89727943C>G   | Missense Mutation | GBP5    | p.W536S  | guanylate binding protei36 (0.00)     | 20 (0.25)  | 0.67 |
| 11-01 | Gp3 | g.chr7:150846136C>T  | Missense Mutation | GBX1    | p.G211D  | gastrulation brain home(240 (0.00)    | 247 (0.18) | 0.48 |
| 11-01 | Gp3 | g.chr2:109087433C>T  | Nonsense Mutation | GCC2    | p.Q550*  | GRIP and coiled-coil do 73 (0.00)     | 34 (0.24)  | 0.63 |
| 11-01 | Gp3 | g.chr2:109103012C>A  | Missense Mutation | GCC2    | p.H1280N | GRIP and coiled-coil do 73 (0.00)     | 75 (0.20)  | 0.53 |
| 11-01 | Gp3 | g.chr6:53370683G>A   | Missense Mutation | GCLC    | p.S403F  | glutamate-cysteine ligas 70 (0.00)    | 41 (0.27)  | 0.72 |
| 11-01 | Gp3 | g.chr12:120611566C>A | Missense Mutation | GCN1L1  | p.M419I  | GCN1 general control o 53 (0.00)      | 38 (0.24)  | 0.63 |
| 11-01 | Gp3 | g.chr9:79117881C>G   | Missense Mutation | GCNT1   | p.A195G  | glucosaminyl (N-acetyl)94 (0.00)      | 74 (0.19)  | 0.62 |
| 11-01 | Gp3 | g.chr5:74325521C>T   | Silent            | GCNT4   | p.Q114Q  | glucosaminyl (N-acetyl)45 (0.00)      | 23 (0.22)  | 0.58 |
| 11-01 | Gp3 | g.chr12:7848241G>A   | Silent            | GDF3    | p.V28V   | growth differentiation fa 31 (0.00)   | 33 (0.18)  | 0.48 |
| 11-01 | Gp3 | g.chr20:34022523C>A  | Missense Mutation | GDF5    | p.E230D  | growth differentiation fa 40 (0.00)   | 47 (0.17)  | 0.45 |
| 11-01 | Gp3 | g.chr10:5842620G>T   | Missense Mutation | GDI2    | p.H32N   | GDP dissociation inhibi 121 (0.00)    | 72 (0.22)  | 0.59 |
| 11-01 | Gp3 | g.chr5:37815859G>T   | Missense Mutation | GDNF    | p.A177E  | glial cell derived neurotr 112 (0.00) | 45 (0.38)  | 1.01 |
| 11-01 | Gp3 | g.chr8:95262647C>G   | Missense Mutation | GEM     | p.S261T  | GTP binding protein ov: 88 (0.00)     | 66 (0.12)  | 0.40 |
| 11-01 | Gp3 | g.chr5:154271151C>T  | Silent            | GEMIN5  | p.R1304R | gem (nuclear organelle) 28 (0.00)     | 34 (0.24)  | 0.63 |
| 11-01 | Gp3 | g.chr5:154271152C>T  | Missense Mutation | GEMIN5  | p.R1304K | gem (nuclear organelle) 29 (0.00)     | 34 (0.24)  | 0.63 |
| 11-01 | Gp3 | g.chr5:154316621C>T  | Silent            | GEMIN5  | p.E97E   | gem (nuclear organelle) 55 (0.00)     | 44 (0.30)  | 0.79 |
| 11-01 | Gp3 | g.chr3:158363992C>G  | Silent            | GFM1    | p.S91S   | G elongation factor, mit 19 (0.00)    | 21 (0.67)  | 1.78 |
| 11-01 | Gp3 | g.chr6:55198590G>A   | Missense Mutation | GFRAL   | p.G55D   | GDNF family receptor a 121 (0.00)     | 166 (0.23) | 0.61 |
| 11-01 | Gp3 | g.chr22:22989308C>T  | Silent            | GGTLC2  | p.N87N   | gamma-glutamyltransfe: 60 (0.00)      | 61 (0.16)  | 0.44 |
| 11-01 | Gp3 | g.chr17:40344277C>T  | Missense Mutation | GHDC    | p.A291T  | GH3 domain containing 20 (0.00)       | 35 (0.14)  | 0.38 |



|       |     |                      |                   |         |          |                                      |           |      |
|-------|-----|----------------------|-------------------|---------|----------|--------------------------------------|-----------|------|
| 11-01 | Gp3 | g.chr11:59604702G>A  | Silent            | GIF     | p.L272L  | gastric intrinsic factor (v52 (0.00) | 34 (0.41) | 1.10 |
| 11-01 | Gp3 | g.chr2:233659483C>T  | Silent            | GIGYF2  | p.P430P  | GRB10 interacting GYF97 (0.00)       | 73 (0.26) | 0.69 |
| 11-01 | Gp3 | g.chr2:233704566C>G  | Missense Mutation | GIGYF2  | p.S919C  | GRB10 interacting GYF22 (0.00)       | 22 (0.59) | 1.58 |
| 11-01 | Gp3 | g.chr2:233709157G>T  | Missense Mutation | GIGYF2  | p.D1054Y | GRB10 interacting GYF18 (0.00)       | 12 (0.58) | 1.56 |
| 11-01 | Gp3 | g.chr7:150389647G>A  | Silent            | GIMAP2  | p.L91L   | GTPase, IMAP family n30 (0.00)       | 16 (0.31) | 0.83 |
| 11-01 | Gp3 | g.chr7:150270139G>A  | Silent            | GIMAP4  | p.A327A  | GTPase, IMAP family n28 (0.00)       | 12 (0.42) | 1.11 |
| 11-01 | Gp3 | g.chr7:150439822C>T  | Nonsense Mutation | GIMAP5  | p.Q199*  | GTPase, IMAP family n37 (0.00)       | 31 (0.23) | 0.60 |
| 11-01 | Gp3 | g.chr7:150439983G>A  | Silent            | GIMAP5  | p.Q252Q  | GTPase, IMAP family n40 (0.00)       | 16 (0.31) | 0.83 |
| 11-01 | Gp3 | g.chr16:58438480C>A  | Silent            | GINS3   | p.A166A  | GINS complex subunit 16 (0.00)       | 12 (0.42) | 1.11 |
| 11-01 | Gp3 | g.chr15:35045322C>T  | Missense Mutation | GJD2    | p.R108H  | gap junction protein, del57 (0.00)   | 32 (0.16) | 0.42 |
| 11-01 | Gp3 | g.chrX:30709267C>G   | Missense Mutation | GK      | p.T122S  | glycerol kinase 18 (0.00)            | 19 (0.63) | 1.05 |
| 11-01 | Gp3 | g.chr15:69548650C>A  | Missense Mutation | GLCE    | p.H105N  | glucuronic acid epimera 101 (0.00)   | 36 (0.19) | 0.52 |
| 11-01 | Gp3 | g.chr9:6604587C>T    | Splice Site       | GLDC    |          | glycine dehydrogenase (83 (0.00)     | 37 (0.38) | 0.60 |
| 11-01 | Gp3 | g.chr9:131285912G>T  | Silent            | GLE1    | p.V228V  | GLE1 RNA export med 47 (0.00)        | 34 (0.41) | 1.10 |
| 11-01 | Gp3 | g.chr7:42063136G>A   | Silent            | GLI3    | p.V476V  | GLI family zinc finger 322 (0.00)    | 29 (0.28) | 0.74 |
| 11-01 | Gp3 | g.chr7:42262826C>T   | Silent            | GLI3    | p.T9T    | GLI family zinc finger 323 (0.00)    | 17 (0.41) | 1.10 |
| 11-01 | Gp3 | g.chr12:75875711C>A  | Missense Mutation | GLIPR1  | p.P91Q   | GLI pathogenesis-relate 71 (0.00)    | 27 (0.22) | 0.59 |
| 11-01 | Gp3 | g.chr4:175710056C>T  | Missense Mutation | GLRA3   | p.R37Q   | glycine receptor, alpha 37 (0.00)    | 31 (0.16) | 0.43 |
| 11-01 | Gp3 | g.chr10:131943513C>T | Missense Mutation | GLRX3   | p.P44L   | glutaredoxin 3 48 (0.00)             | 24 (0.21) | 0.56 |
| 11-01 | Gp3 | g.chr12:129360498G>A | Silent            | GLT1D1  | p.K36K   | glycosyltransferase 1 do40 (0.03)    | 35 (0.77) | 2.06 |
| 11-01 | Gp3 | g.chr12:104383226G>A | Missense Mutation | GLT8D2  | p.P337L  | glycosyltransferase 8 do50 (0.00)    | 20 (0.25) | 0.67 |
| 11-01 | Gp3 | g.chr11:58723441G>T  | Nonsense Mutation | GLYATL1 | p.E284*  | glycine-N-acyltransferase 20 (0.00)  | 13 (0.69) | 1.85 |
| 11-01 | Gp3 | g.chr3:179137194C>T  | Missense Mutation | GNB4    | p.D66N   | guanine nucleotide bind 63 (0.00)    | 33 (0.36) | 0.97 |
| 11-01 | Gp3 | g.chr9:36233988C>A   | Missense Mutation | GNE     | p.G194V  | glucosamine (UDP-N-ac 77 (0.01)      | 27 (0.41) | 0.62 |
| 11-01 | Gp3 | g.chr3:52723211T>A   | Nonsense Mutation | GNL3    | p.L177*  | guanine nucleotide bind 39 (0.00)    | 69 (0.19) | 0.50 |
| 11-01 | Gp3 | g.chr12:102155359C>T | Missense Mutation | GNPTAB  | p.M966I  | N-acetylglucosamine-1- 49 (0.00)     | 50 (0.28) | 0.75 |
| 11-01 | Gp3 | g.chr12:102179940G>A | Silent            | GNPTAB  | p.L141L  | N-acetylglucosamine-1- 27 (0.00)     | 33 (0.33) | 0.89 |
| 11-01 | Gp3 | g.chr9:131019933G>A  | Missense Mutation | GOLGA2  | p.R862W  | golgin A2 69 (0.00)                  | 39 (0.21) | 0.55 |
| 11-01 | Gp3 | g.chr12:133381339C>A | Missense Mutation | GOLGA3  | p.E520D  | golgin A3 26 (0.00)                  | 40 (0.17) | 0.47 |
| 11-01 | Gp3 | g.chr3:37365621G>A   | Silent            | GOLGA4  | p.Q770Q  | golgin A4 31 (0.00)                  | 28 (0.25) | 0.67 |
| 11-01 | Gp3 | g.chr3:37366433C>A   | Nonsense Mutation | GOLGA4  | p.S1041* | golgin A4 59 (0.00)                  | 30 (0.27) | 0.71 |
| 11-01 | Gp3 | g.chr3:121414107C>A  | Missense Mutation | GOLGB1  | p.D1755Y | golgin B1 53 (0.00)                  | 20 (0.30) | 0.80 |
| 11-01 | Gp3 | g.chr3:121416230T>C  | Missense Mutation | GOLGB1  | p.E1047G | golgin B1 60 (0.00)                  | 26 (0.19) | 0.51 |
| 11-01 | Gp3 | g.chr17:28849325C>T  | Missense Mutation | GOSR1   | p.R226W  | golgi SNAP receptor co.28 (0.00)     | 22 (0.55) | 1.45 |
| 11-01 | Gp3 | g.chr17:4835967C>A   | Missense Mutation | GP1BA   | p.S23Y   | glycoprotein Ib (platelet 63 (0.00)  | 41 (0.22) | 0.59 |

|       |     |                      |                   |            |          |                                     |           |      |
|-------|-----|----------------------|-------------------|------------|----------|-------------------------------------|-----------|------|
| 11-01 | Gp3 | g.chr17:4835968C>A   | Silent            | GP1BA      | p.S23S   | glycoprotein Ib (platelet 63 (0.00) | 41 (0.22) | 0.59 |
| 11-01 | Gp3 | g.chr10:113920612G>T | Silent            | GPAM       | p.S503S  | glycerol-3-phosphate ac 35 (0.00)   | 25 (0.24) | 0.64 |
| 11-01 | Gp3 | g.chr6:24456803G>A   | Silent            | GPLD1      | p.G357G  | glycosylphosphatidylinc 109 (0.00)  | 26 (0.19) | 0.51 |
| 11-01 | Gp3 | g.chr4:176556076G>A  | Missense Mutation | GPM6A      | p.R273W  | glycoprotein M6A 53 (0.00)          | 41 (0.20) | 0.52 |
| 11-01 | Gp3 | g.chrX:135405376G>T  | Missense Mutation | GPR112     | p.E170D  | G protein-coupled recep 27 (0.00)   | 18 (0.28) | 0.46 |
| 11-01 | Gp3 | g.chrX:135427820A>G  | Missense Mutation | GPR112     | p.N652S  | G protein-coupled recep 46 (0.00)   | 34 (0.26) | 0.44 |
| 11-01 | Gp3 | g.chrX:135429941G>A  | Missense Mutation | GPR112     | p.S1359N | G protein-coupled recep 34 (0.00)   | 20 (0.25) | 0.42 |
| 11-01 | Gp3 | g.chrX:135430843C>T  | Missense Mutation | GPR112     | p.P1660S | G protein-coupled recep 28 (0.00)   | 24 (0.42) | 0.69 |
| 11-01 | Gp3 | g.chr2:26534912C>G   | Missense Mutation | GPR113     | p.D493H  | G protein-coupled recep 27 (0.00)   | 12 (0.75) | 2.00 |
| 11-01 | Gp3 | g.chr6:142711446C>T  | Missense Mutation | GPR126     | p.P425L  | G protein-coupled recep 57 (0.00)   | 32 (0.19) | 0.50 |
| 11-01 | Gp3 | g.chr3:100373865G>A  | Silent            | GPR128     | p.P227P  | G protein-coupled recep 59 (0.02)   | 36 (0.56) | 1.48 |
| 11-01 | Gp3 | g.chr3:100413790C>T  | Missense Mutation | GPR128     | p.P485L  | G protein-coupled recep 68 (0.00)   | 58 (0.17) | 0.46 |
| 11-01 | Gp3 | g.chr12:131593347C>A | Missense Mutation | GPR133     | p.H342N  | G protein-coupled recep 24 (0.00)   | 27 (0.33) | 0.89 |
| 11-01 | Gp3 | g.chr1:236341927G>T  | Missense Mutation | GPR137B    | p.L226F  | G protein-coupled recep 73 (0.00)   | 22 (0.41) | 0.78 |
| 11-01 | Gp3 | g.chr1:236341928G>T  | Nonsense Mutation | GPR137B    | p.E227*  | G protein-coupled recep 73 (0.00)   | 22 (0.41) | 0.78 |
| 11-01 | Gp3 | g.chr5:145895263C>A  | Missense Mutation | GPR151     | p.M138I  | G protein-coupled recep 44 (0.00)   | 40 (0.17) | 0.47 |
| 11-01 | Gp3 | g.chr1:6314735C>G    | Missense Mutation | GPR153     | p.E77D   | G protein-coupled recep 18 (0.00)   | 19 (0.58) | 1.54 |
| 11-01 | Gp3 | g.chr12:57389174C>A  | Missense Mutation | GPR182     | p.L61M   | G protein-coupled recep 26 (0.00)   | 29 (0.21) | 0.55 |
| 11-01 | Gp3 | g.chr12:57389224C>A  | Silent            | GPR182     | p.V77V   | G protein-coupled recep 25 (0.00)   | 31 (0.19) | 0.52 |
| 11-01 | Gp3 | g.chr12:57390068C>T  | Missense Mutation | GPR182     | p.H359Y  | G protein-coupled recep 18 (0.00)   | 34 (0.15) | 0.39 |
| 11-01 | Gp3 | g.chr16:57685144C>T  | Missense Mutation | GPR56      | p.R33C   | G protein-coupled recep 17 (0.00)   | 20 (0.70) | 1.87 |
| 11-01 | Gp3 | g.chr2:53956635G>A   | Missense Mutation | GPR75-ASB3 | p.S143F  | GPR75-ASB3 readthrou 125 (0.00)     | 97 (0.14) | 0.38 |
| 11-01 | Gp3 | g.chr5:89933661C>A   | Silent            | GPR98      | p.G712G  | G protein-coupled recep 37 (0.00)   | 37 (0.19) | 0.50 |
| 11-01 | Gp3 | g.chr5:89990235G>C   | Missense Mutation | GPR98      | p.L2554F | G protein-coupled recep 65 (0.00)   | 25 (0.48) | 1.28 |
| 11-01 | Gp3 | g.chr5:176025465G>T  | Missense Mutation | GPRIN1     | p.D457E  | G protein regulated indu 17 (0.00)  | 11 (0.64) | 1.70 |
| 11-01 | Gp3 | g.chr16:46940848C>G  | Missense Mutation | GPT2       | p.D179E  | glutamic pyruvate trans 28 (0.00)   | 15 (0.60) | 1.60 |
| 11-01 | Gp3 | g.chr1:53072361C>T   | Silent            | GPX7       | p.S48S   | glutathione peroxidase 763 (0.00)   | 61 (0.16) | 0.44 |
| 11-01 | Gp3 | g.chr11:123480981T>C | Silent            | GRAMD1B    | p.H475H  | GRAM domain containi 29 (0.00)      | 17 (0.53) | 1.41 |
| 11-01 | Gp3 | g.chr5:125816397C>T  | Silent            | GRAMD3     | p.L245L  | GRAM domain containi 53 (0.00)      | 34 (0.24) | 0.63 |
| 11-01 | Gp3 | g.chr22:47069680C>G  | Missense Mutation | GRAMD4     | p.F451L  | GRAM domain containi 24 (0.00)      | 43 (0.16) | 0.43 |
| 11-01 | Gp3 | g.chr7:50660672G>T   | Missense Mutation | GRB10      | p.H588N  | growth factor receptor-b 25 (0.00)  | 12 (0.50) | 1.33 |
| 11-01 | Gp3 | g.chr7:50663163G>C   | Missense Mutation | GRB10      | p.Q537E  | growth factor receptor-b 111 (0.00) | 35 (0.17) | 0.46 |
| 11-01 | Gp3 | g.chr2:11752668G>A   | Silent            | GREB1      | p.L1018L | growth regulation by est 83 (0.00)  | 55 (0.15) | 0.39 |
| 11-01 | Gp3 | g.chr5:153054134C>A  | Nonsense Mutation | GRIA1      | p.Y268*  | glutamate receptor, iono 54 (0.00)  | 52 (0.17) | 0.46 |
| 11-01 | Gp3 | g.chr4:158256933C>A  | Missense Mutation | GRIA2      | p.F459L  | glutamate receptor, iono 67 (0.00)  | 34 (0.24) | 0.63 |

|       |     |                      |                   |             |         |                           |            |            |      |
|-------|-----|----------------------|-------------------|-------------|---------|---------------------------|------------|------------|------|
| 11-01 | Gp3 | g.chr10:87484283C>A  | Missense Mutation | GRID1       | p.D562Y | glutamate receptor, iono  | 79 (0.00)  | 22 (0.23)  | 0.61 |
| 11-01 | Gp3 | g.chr4:94693326G>T   | Missense Mutation | GRID2       | p.D901Y | glutamate receptor, iono  | 81 (0.00)  | 33 (0.24)  | 0.65 |
| 11-01 | Gp3 | g.chr11:120732718C>A | Silent            | GRIK4       | p.I265I | glutamate receptor, iono  | 154 (0.00) | 65 (0.34)  | 0.90 |
| 11-01 | Gp3 | g.chr11:120732736C>A | Missense Mutation | GRIK4       | p.F271L | glutamate receptor, iono  | 212 (0.00) | 92 (0.34)  | 0.90 |
| 11-01 | Gp3 | g.chr12:13906452G>A  | Missense Mutation | GRIN2B      | p.P270L | glutamate receptor, iono  | 39 (0.00)  | 32 (0.16)  | 0.42 |
| 11-01 | Gp3 | g.chr12:66788031G>T  | Missense Mutation | GRIP1       | p.P644T | glutamate receptor inter: | 76 (0.00)  | 23 (0.22)  | 0.58 |
| 11-01 | Gp3 | g.chr3:14567038C>G   | RNA               | GRIP2       |         | glutamate receptor inter: | 58 (0.00)  | 42 (0.14)  | 0.38 |
| 11-01 | Gp3 | g.chr1:182152111G>T  | lincRNA           | GS1-122H1.2 |         |                           | 23 (0.00)  | 36 (0.17)  | 0.44 |
| 11-01 | Gp3 | g.chr7:76982959C>G   | Splice Site       | GSAP        |         | gamma-secretase activa    | 206 (0.00) | 82 (0.16)  | 0.42 |
| 11-01 | Gp3 | g.chr7:77011907C>T   | Silent            | GSAP        | p.L170L | gamma-secretase activa    | 23 (0.00)  | 27 (0.26)  | 0.69 |
| 11-01 | Gp3 | g.chr16:85697065C>A  | Missense Mutation | GSE1        | p.P830Q | Gse1 coiled-coil protein  | 23 (0.00)  | 23 (0.74)  | 1.56 |
| 11-01 | Gp3 | g.chr20:33533871G>A  | Missense Mutation | GSS         | p.P54S  | glutathione synthetase    | 46 (0.00)  | 71 (0.15)  | 0.41 |
| 11-01 | Gp3 | g.chr4:106639143G>A  | Missense Mutation | GSTCD       | p.E125K | glutathione S-transferas  | 47 (0.00)  | 38 (0.24)  | 0.63 |
| 11-01 | Gp3 | g.chr7:142961658C>A  | Missense Mutation | GSTK1       | p.L58M  | glutathione S-transferas  | 138 (0.00) | 88 (0.18)  | 0.48 |
| 11-01 | Gp3 | g.chr7:142965229C>T  | Missense Mutation | GSTK1       | p.H195Y | glutathione S-transferas  | 256 (0.00) | 247 (0.15) | 0.41 |
| 11-01 | Gp3 | g.chr1:110217380G>A  | Silent            | GSTM2       | p.K193K | glutathione S-transferas  | 38 (0.00)  | 28 (0.25)  | 0.67 |
| 11-01 | Gp3 | g.chr10:106037784C>T | Silent            | GSTO2       | p.Y92Y  | glutathione S-transferas  | 21 (0.00)  | 19 (0.68)  | 1.82 |
| 11-01 | Gp3 | g.chr10:106039188C>A | Missense Mutation | GSTO2       | p.L143M | glutathione S-transferas  | 97 (0.00)  | 112 (0.16) | 0.43 |
| 11-01 | Gp3 | g.chr10:106059025G>A | Missense Mutation | GSTO2       | p.D239N | glutathione S-transferas  | 41 (0.00)  | 34 (0.15)  | 0.39 |
| 11-01 | Gp3 | g.chr1:89352997A>G   | Missense Mutation | GTF2B       | p.V24A  | general transcription fac | 73 (0.00)  | 33 (0.33)  | 0.89 |
| 11-01 | Gp3 | g.chr12:124144743G>A | Silent            | GTF2H3      | p.V296V | general transcription fac | 94 (0.00)  | 63 (0.29)  | 0.76 |
| 11-01 | Gp3 | g.chr9:135554540T>C  | Missense Mutation | GTF3C4      | p.F512L | general transcription fac | 45 (0.00)  | 27 (0.26)  | 0.69 |
| 11-01 | Gp3 | g.chr7:89983832T>C   | Silent            | GTPBP10     | p.I96I  | GTP-binding protein 10    | 35 (0.00)  | 54 (0.26)  | 0.69 |
| 11-01 | Gp3 | g.chr7:90012375C>A   | Missense Mutation | GTPBP10     | p.Q295K | GTP-binding protein 10    | 113 (0.00) | 73 (0.32)  | 0.84 |
| 11-01 | Gp3 | g.chr6:43592675G>A   | Missense Mutation | GTPBP2      | p.S277L | GTP binding protein 2     | 26 (0.00)  | 19 (0.26)  | 0.70 |
| 11-01 | Gp3 | g.chr11:106681181C>T | Missense Mutation | GUCY1A2     | p.M431I | guanylate cyclase 1, sol  | 56 (0.00)  | 43 (0.23)  | 0.62 |
| 11-01 | Gp3 | g.chr7:65429388G>A   | Silent            | GUSB        | p.L571L | glucuronidase, beta       | 85 (0.00)  | 89 (0.19)  | 0.51 |
| 11-01 | Gp3 | g.chr11:6737984G>A   | RNA               | GVINP1      |         | GTPase, very large inter  | 115 (0.01) | 77 (0.16)  | 0.42 |
| 11-01 | Gp3 | g.chr20:23345114G>A  | Missense Mutation | GZF1        | p.D32N  | GDNF-inducible zinc fi    | 52 (0.00)  | 49 (0.20)  | 0.54 |
| 11-01 | Gp3 | g.chr20:23350824G>C  | Missense Mutation | GZF1        | p.E628Q | GDNF-inducible zinc fi    | 98 (0.00)  | 45 (0.18)  | 0.47 |
| 11-01 | Gp3 | g.chr5:54327195C>A   | Missense Mutation | GZMK        | p.Q123K | granzyme K (granzyme      | 27 (0.00)  | 14 (0.43)  | 1.14 |
| 11-01 | Gp3 | g.chr2:26415187C>T   | Silent            | HADHA       | p.K664K | hydroxyacyl-CoA dehy      | 44 (0.00)  | 27 (0.37)  | 0.99 |
| 11-01 | Gp3 | g.chr19:35775870C>T  | Silent            | HAMP        | p.D60D  | hepcidin antimicrobial p  | 44 (0.00)  | 27 (0.19)  | 0.49 |
| 11-01 | Gp3 | g.chr5:82937482C>A   | Nonsense Mutation | HAPLN1      | p.G300* | hyaluronan and proteogl   | 95 (0.00)  | 40 (0.42)  | 1.13 |
| 11-01 | Gp3 | g.chr5:140073524C>A  | Missense Mutation | HARS2       | p.T63N  | histidyl-tRNA synthetas   | 69 (0.00)  | 39 (0.26)  | 0.68 |

|       |     |                      |                   |       |         |                                    |            |      |
|-------|-----|----------------------|-------------------|-------|---------|------------------------------------|------------|------|
| 11-01 | Gp3 | g.chr15:42853598C>A  | Missense Mutation | HAUS2 | p.H129Q | HAUS augmin-like com 17 (0.00)     | 18 (0.33)  | 0.89 |
| 11-01 | Gp3 | g.chr9:19058309C>A   | Missense Mutation | HAUS6 | p.G819V | HAUS augmin-like com 31 (0.00)     | 16 (0.56)  | 0.89 |
| 11-01 | Gp3 | g.chr1:154247680C>A  | Missense Mutation | HAX1  | p.Q203K | HCLS1 associated prote 34 (0.00)   | 29 (0.59)  | 1.56 |
| 11-01 | Gp3 | g.chr6:135308816C>T  | Silent            | HBS1L | p.T399T | HBS1-like translational 94 (0.00)  | 60 (0.35)  | 0.93 |
| 11-01 | Gp3 | g.chr12:123187249G>A | Silent            | HCAR2 | p.L194L | hydroxycarboxylic acid 68 (0.00)   | 37 (0.32)  | 0.86 |
| 11-01 | Gp3 | g.chr12:123187253A>G | Missense Mutation | HCAR2 | p.F193S | hydroxycarboxylic acid 66 (0.00)   | 37 (0.30)  | 0.79 |
| 11-01 | Gp3 | g.chr20:30659476T>A  | Missense Mutation | HCK   | p.M4K   | HCK proto-oncogene, S 38 (0.00)    | 26 (0.42)  | 1.13 |
| 11-01 | Gp3 | g.chr20:30659477G>A  | Missense Mutation | HCK   | p.M4I   | HCK proto-oncogene, S 38 (0.00)    | 25 (0.44)  | 1.17 |
| 11-01 | Gp3 | g.chr3:121366234C>T  | Missense Mutation | HCLS1 | p.E74K  | hematopoietic cell-speci 18 (0.00) | 37 (0.73)  | 1.95 |
| 11-01 | Gp3 | g.chr5:141009680G>A  | Silent            | HDAC3 | p.P98P  | histone deacetylase 3 102 (0.00)   | 91 (0.25)  | 0.67 |
| 11-01 | Gp3 | g.chr7:18554373G>A   | Intron            | HDAC9 |         | histone deacetylase 9 40 (0.00)    | 20 (0.30)  | 0.80 |
| 11-01 | Gp3 | g.chr7:18570751C>A   | Intron            | HDAC9 |         | histone deacetylase 9 26 (0.00)    | 46 (0.74)  | 1.97 |
| 11-01 | Gp3 | g.chr7:18572923C>T   | Intron            | HDAC9 |         | histone deacetylase 9 90 (0.00)    | 39 (0.15)  | 0.41 |
| 11-01 | Gp3 | g.chr7:18578758G>A   | Intron            | HDAC9 |         | histone deacetylase 9 23 (0.00)    | 11 (0.55)  | 1.45 |
| 11-01 | Gp3 | g.chr7:18580880C>T   | Intron            | HDAC9 |         | histone deacetylase 9 33 (0.00)    | 24 (0.38)  | 1.00 |
| 11-01 | Gp3 | g.chr7:18585801G>C   | Intron            | HDAC9 |         | histone deacetylase 9 25 (0.00)    | 27 (0.59)  | 1.58 |
| 11-01 | Gp3 | g.chr7:18593276G>A   | Intron            | HDAC9 |         | histone deacetylase 9 25 (0.00)    | 33 (0.21)  | 0.57 |
| 11-01 | Gp3 | g.chr7:18603392G>T   | Intron            | HDAC9 |         | histone deacetylase 9 39 (0.00)    | 44 (0.16)  | 0.42 |
| 11-01 | Gp3 | g.chr7:18606135C>A   | Intron            | HDAC9 |         | histone deacetylase 9 49 (0.00)    | 23 (0.22)  | 0.58 |
| 11-01 | Gp3 | g.chr7:18610344C>T   | Intron            | HDAC9 |         | histone deacetylase 9 69 (0.00)    | 78 (0.19)  | 0.51 |
| 11-01 | Gp3 | g.chr7:18610370C>T   | Intron            | HDAC9 |         | histone deacetylase 9 46 (0.00)    | 65 (0.23)  | 0.62 |
| 11-01 | Gp3 | g.chr7:18638822G>C   | Intron            | HDAC9 |         | histone deacetylase 9 34 (0.00)    | 12 (0.42)  | 1.11 |
| 11-01 | Gp3 | g.chr7:18650386G>A   | Intron            | HDAC9 |         | histone deacetylase 9 90 (0.00)    | 62 (0.16)  | 0.43 |
| 11-01 | Gp3 | g.chr7:18656880C>T   | Intron            | HDAC9 |         | histone deacetylase 9 251 (0.00)   | 124 (0.30) | 0.80 |
| 11-01 | Gp3 | g.chr7:18703110G>A   | Intron            | HDAC9 |         | histone deacetylase 9 87 (0.00)    | 43 (0.21)  | 0.56 |
| 11-01 | Gp3 | g.chr7:18703321G>C   | Intron            | HDAC9 |         | histone deacetylase 9 111 (0.00)   | 98 (0.14)  | 0.38 |
| 11-01 | Gp3 | g.chr7:18703910G>A   | Intron            | HDAC9 |         | histone deacetylase 9 40 (0.00)    | 24 (0.21)  | 0.56 |
| 11-01 | Gp3 | g.chr7:18726067C>G   | Intron            | HDAC9 |         | histone deacetylase 9 70 (0.00)    | 51 (0.18)  | 0.47 |
| 11-01 | Gp3 | g.chr7:18743577C>T   | Intron            | HDAC9 |         | histone deacetylase 9 59 (0.00)    | 69 (0.30)  | 0.81 |
| 11-01 | Gp3 | g.chr7:18744844C>T   | Intron            | HDAC9 |         | histone deacetylase 9 159 (0.01)   | 126 (0.16) | 0.42 |
| 11-01 | Gp3 | g.chr7:18747538G>T   | Intron            | HDAC9 |         | histone deacetylase 9 55 (0.00)    | 21 (0.33)  | 0.89 |
| 11-01 | Gp3 | g.chr7:18748306G>T   | Intron            | HDAC9 |         | histone deacetylase 9 206 (0.00)   | 127 (0.27) | 0.71 |
| 11-01 | Gp3 | g.chr7:18765431G>C   | Intron            | HDAC9 |         | histone deacetylase 9 55 (0.00)    | 32 (0.16)  | 0.42 |
| 11-01 | Gp3 | g.chr7:18781915A>T   | Intron            | HDAC9 |         | histone deacetylase 9 49 (0.00)    | 33 (0.18)  | 0.48 |
| 11-01 | Gp3 | g.chr7:18782854C>A   | Intron            | HDAC9 |         | histone deacetylase 9 32 (0.00)    | 30 (0.40)  | 1.07 |

|       |     |                      |                   |         |          |                        |            |           |      |
|-------|-----|----------------------|-------------------|---------|----------|------------------------|------------|-----------|------|
| 11-01 | Gp3 | g.chr7:18795762C>A   | Intron            | HDAC9   |          | histone deacetylase 9  | 104 (0.00) | 54 (0.15) | 0.40 |
| 11-01 | Gp3 | g.chr7:18827796C>A   | Intron            | HDAC9   |          | histone deacetylase 9  | 26 (0.00)  | 26 (0.23) | 0.62 |
| 11-01 | Gp3 | g.chr7:18868301G>T   | Intron            | HDAC9   |          | histone deacetylase 9  | 22 (0.00)  | 33 (0.30) | 0.81 |
| 11-01 | Gp3 | g.chr7:18881170G>C   | Intron            | HDAC9   |          | histone deacetylase 9  | 59 (0.00)  | 45 (0.29) | 0.77 |
| 11-01 | Gp3 | g.chr7:18884275G>A   | Intron            | HDAC9   |          | histone deacetylase 9  | 80 (0.00)  | 28 (0.32) | 0.86 |
| 11-01 | Gp3 | g.chr7:18888154G>A   | Intron            | HDAC9   |          | histone deacetylase 9  | 30 (0.00)  | 13 (0.69) | 1.85 |
| 11-01 | Gp3 | g.chr7:18893714G>T   | Intron            | HDAC9   |          | histone deacetylase 9  | 16 (0.00)  | 12 (0.50) | 1.33 |
| 11-01 | Gp3 | g.chr7:18898987C>T   | Intron            | HDAC9   |          | histone deacetylase 9  | 65 (0.00)  | 42 (0.33) | 0.89 |
| 11-01 | Gp3 | g.chr7:18905831G>C   | Intron            | HDAC9   |          | histone deacetylase 9  | 97 (0.00)  | 25 (0.32) | 0.85 |
| 11-01 | Gp3 | g.chr7:18932937C>G   | Intron            | HDAC9   |          | histone deacetylase 9  | 98 (0.00)  | 42 (0.19) | 0.51 |
| 11-01 | Gp3 | g.chr7:18934013G>A   | Intron            | HDAC9   |          | histone deacetylase 9  | 70 (0.00)  | 46 (0.39) | 1.04 |
| 11-01 | Gp3 | g.chr7:18934787C>T   | Intron            | HDAC9   |          | histone deacetylase 9  | 97 (0.00)  | 62 (0.19) | 0.52 |
| 11-01 | Gp3 | g.chr7:18940332G>C   | Intron            | HDAC9   |          | histone deacetylase 9  | 24 (0.00)  | 17 (0.47) | 1.25 |
| 11-01 | Gp3 | g.chr7:18950407T>A   | Intron            | HDAC9   |          | histone deacetylase 9  | 43 (0.00)  | 35 (0.31) | 0.84 |
| 11-01 | Gp3 | g.chr7:18956016G>T   | Intron            | HDAC9   |          | histone deacetylase 9  | 65 (0.00)  | 25 (0.20) | 0.53 |
| 11-01 | Gp3 | g.chr7:18957458C>T   | Intron            | HDAC9   |          | histone deacetylase 9  | 45 (0.00)  | 54 (0.17) | 0.44 |
| 11-01 | Gp3 | g.chr7:18963182C>G   | Intron            | HDAC9   |          | histone deacetylase 9  | 103 (0.00) | 53 (0.17) | 0.45 |
| 11-01 | Gp3 | g.chr7:18964894C>G   | Intron            | HDAC9   |          | histone deacetylase 9  | 78 (0.00)  | 30 (0.23) | 0.62 |
| 11-01 | Gp3 | g.chr7:18978399C>A   | Intron            | HDAC9   |          | histone deacetylase 9  | 24 (0.00)  | 15 (0.40) | 1.07 |
| 11-01 | Gp3 | g.chr7:18988866A>G   | Intron            | HDAC9   |          | histone deacetylase 9  | 143 (0.00) | 96 (0.26) | 0.69 |
| 11-01 | Gp3 | g.chr7:18995697C>T   | Intron            | HDAC9   |          | histone deacetylase 9  | 59 (0.00)  | 41 (0.20) | 0.52 |
| 11-01 | Gp3 | g.chr7:19016278G>A   | Intron            | HDAC9   |          | histone deacetylase 9  | 52 (0.00)  | 18 (0.28) | 0.74 |
| 11-01 | Gp3 | g.chr7:19021421C>T   | Intron            | HDAC9   |          | histone deacetylase 9  | 27 (0.00)  | 40 (0.45) | 1.20 |
| 11-01 | Gp3 | g.chr1:236736065C>T  | Missense Mutation | HEATR1  | p.G1175S | HEAT repeat containing | 70 (0.00)  | 72 (0.22) | 0.42 |
| 11-01 | Gp3 | g.chr1:236736113C>G  | Missense Mutation | HEATR1  | p.E1159Q | HEAT repeat containing | 49 (0.00)  | 59 (0.24) | 0.45 |
| 11-01 | Gp3 | g.chr1:236746439G>C  | Missense Mutation | HEATR1  | p.L767V  | HEAT repeat containing | 92 (0.00)  | 88 (0.20) | 0.39 |
| 11-01 | Gp3 | g.chr1:236759283G>A  | Missense Mutation | HEATR1  | p.S269F  | HEAT repeat containing | 82 (0.00)  | 46 (0.28) | 0.54 |
| 11-01 | Gp3 | g.chr14:73974895C>A  | Missense Mutation | HEATR4  | p.K608N  | HEAT repeat containing | 62 (0.00)  | 49 (0.18) | 0.49 |
| 11-01 | Gp3 | g.chr2:37232852G>A   | Missense Mutation | HEATR5B | p.H1610Y | HEAT repeat containing | 44 (0.00)  | 35 (0.23) | 0.61 |
| 11-01 | Gp3 | g.chr14:31583232G>C  | Missense Mutation | HECTD1  | p.L1903V | HECT domain containir  | 39 (0.00)  | 37 (0.16) | 0.43 |
| 11-01 | Gp3 | g.chr14:31598182G>A  | Silent            | HECTD1  | p.G1465G | HECT domain containir  | 74 (0.00)  | 49 (0.18) | 0.49 |
| 11-01 | Gp3 | g.chr10:93272106G>C  | Missense Mutation | HECTD2  | p.G766R  | HECT domain containir  | 74 (0.00)  | 37 (0.19) | 0.50 |
| 11-01 | Gp3 | g.chr1:45475086C>T   | Missense Mutation | HECTD3  | p.G315D  | HECT domain containir  | 73 (0.00)  | 66 (0.21) | 0.57 |
| 11-01 | Gp3 | g.chr1:45475672C>T   | Missense Mutation | HECTD3  | p.V249I  | HECT domain containir  | 56 (0.00)  | 42 (0.26) | 0.70 |
| 11-01 | Gp3 | g.chr12:112600244G>C | Missense Mutation | HECTD4  | p.L4256V | HECT domain containir  | 60 (0.00)  | 19 (0.26) | 0.70 |

|       |     |                      |                   |           |          |                                     |            |      |
|-------|-----|----------------------|-------------------|-----------|----------|-------------------------------------|------------|------|
| 11-01 | Gp3 | g.chr12:112681213G>A | Silent            | HECTD4    | p.V1488V | HECT domain containir 17 (0.00)     | 27 (0.22)  | 0.59 |
| 11-01 | Gp3 | g.chr7:43519220G>A   | Silent            | HECW1     | p.V1003V | HECT, C2 and WW dor 25 (0.00)       | 18 (0.33)  | 0.89 |
| 11-01 | Gp3 | g.chr2:197183986G>A  | Missense Mutation | HECW2     | p.A187V  | HECT, C2 and WW dor 28 (0.00)       | 24 (0.71)  | 1.89 |
| 11-01 | Gp3 | g.chr3:124729347G>A  | Silent            | HEG1      | p.D1003D | heart development prote 61 (0.00)   | 38 (0.21)  | 0.56 |
| 11-01 | Gp3 | g.chr3:124731563C>G  | Missense Mutation | HEG1      | p.V954L  | heart development prote 115 (0.00)  | 155 (0.20) | 0.53 |
| 11-01 | Gp3 | g.chr17:65105537G>A  | Missense Mutation | HELZ      | p.P1395L | helicase with zinc finger 89 (0.00) | 76 (0.17)  | 0.46 |
| 11-01 | Gp3 | g.chr15:63908067G>A  | Missense Mutation | HERC1     | p.P4665L | HECT and RLD domain 28 (0.00)       | 24 (0.50)  | 1.33 |
| 11-01 | Gp3 | g.chr15:63920958T>A  | Missense Mutation | HERC1     | p.Q4341H | HECT and RLD domain 110 (0.01)      | 76 (0.30)  | 0.81 |
| 11-01 | Gp3 | g.chr15:63930724C>A  | Silent            | HERC1     | p.L3993L | HECT and RLD domain 190 (0.00)      | 190 (0.14) | 0.38 |
| 11-01 | Gp3 | g.chr15:63967142T>C  | Silent            | HERC1     | p.E2415E | HECT and RLD domain 101 (0.00)      | 76 (0.37)  | 0.98 |
| 11-01 | Gp3 | g.chr15:63988469G>C  | Missense Mutation | HERC1     | p.L1659V | HECT and RLD domain 54 (0.00)       | 16 (0.31)  | 0.83 |
| 11-01 | Gp3 | g.chr15:64039190C>G  | Missense Mutation | HERC1     | p.G816A  | HECT and RLD domain 57 (0.00)       | 28 (0.18)  | 0.48 |
| 11-01 | Gp3 | g.chr15:28483329C>T  | Silent            | HERC2     | p.L1261L | HECT and RLD domain 249 (0.00)      | 146 (0.27) | 0.73 |
| 11-01 | Gp3 | g.chr15:28491088G>A  | Silent            | HERC2     | p.N1172N | HECT and RLD domain 64 (0.00)       | 24 (0.25)  | 0.67 |
| 11-01 | Gp3 | g.chr15:28513758G>A  | Missense Mutation | HERC2     | p.P484L  | HECT and RLD domain 17 (0.00)       | 14 (0.43)  | 1.14 |
| 11-01 | Gp3 | g.chr15:28902482G>T  | RNA               | HERC2P9   |          | hect domain and RLD 2 47 (0.00)     | 30 (0.30)  | 0.80 |
| 11-01 | Gp3 | g.chr4:89574166G>A   | Missense Mutation | HERC3     | p.A204T  | HECT and RLD domain 43 (0.00)       | 35 (0.14)  | 0.38 |
| 11-01 | Gp3 | g.chr16:56976099G>T  | Missense Mutation | HERPUD1   | p.D321Y  | homocysteine-inducible 93 (0.00)    | 122 (0.22) | 0.59 |
| 11-01 | Gp3 | g.chr3:57232934C>T   | Silent            | HESX1     | p.G68G   | HESX homeobox 1 69 (0.00)           | 35 (0.23)  | 0.61 |
| 11-01 | Gp3 | g.chr5:74016278C>A   | Missense Mutation | HEXB      | p.F481L  | hexosaminidase B (beta 47 (0.00)    | 55 (0.20)  | 0.53 |
| 11-01 | Gp3 | g.chr17:80382306C>T  | Missense Mutation | HEXDC     | p.L41F   | hexosaminidase (glycos 69 (0.00)    | 48 (0.25)  | 0.67 |
| 11-01 | Gp3 | g.chr3:120365852G>C  | Missense Mutation | HGD       | p.L173V  | homogentisate 1,2-dioxy 73 (0.00)   | 53 (0.28)  | 0.75 |
| 11-01 | Gp3 | g.chr7:81335719C>T   | Nonsense Mutation | HGF       | p.W547*  | hepatocyte growth facto 38 (0.00)   | 40 (0.30)  | 0.80 |
| 11-01 | Gp3 | g.chr7:81339465G>A   | Silent            | HGF       | p.Y513Y  | hepatocyte growth facto 20 (0.00)   | 19 (0.68)  | 1.82 |
| 11-01 | Gp3 | g.chr8:43033323C>T   | Silent            | HGSNAT    | p.L320L  | heparan-alpha-glucosam 166 (0.01)   | 126 (0.18) | 0.49 |
| 11-01 | Gp3 | g.chr1:210560862G>A  | Nonsense Mutation | HHAT      | p.W70*   | hedgehog acyltransferas 57 (0.00)   | 32 (0.25)  | 0.67 |
| 11-01 | Gp3 | g.chr4:145655924G>T  | Missense Mutation | HHIP      | p.V598L  | hedgehog interacting pr 40 (0.00)   | 22 (0.27)  | 0.73 |
| 11-01 | Gp3 | g.chr1:222705411C>T  | Nonsense Mutation | HHIPL2    | p.W540*  | HHIP-like 2 18 (0.00)               | 24 (0.21)  | 0.56 |
| 11-01 | Gp3 | g.chr14:62205006C>G  | Nonsense Mutation | HIF1A     | p.S485*  | hypoxia inducible factor 29 (0.00)  | 35 (0.43)  | 1.14 |
| 11-01 | Gp3 | g.chr11:119003405C>T | Silent            | HINFP     | p.T263T  | histone H4 transcription 23 (0.00)  | 38 (0.16)  | 0.42 |
| 11-01 | Gp3 | g.chr22:19349352C>A  | Silent            | HIRA      | p.L626L  | histone cell cycle regula 61 (0.00) | 51 (0.24)  | 0.63 |
| 11-01 | Gp3 | g.chr6:26033526C>T   | Missense Mutation | HIST1H2AB | p.D91N   | histone cluster 1, H2ab 63 (0.00)   | 80 (0.19)  | 0.50 |
| 11-01 | Gp3 | g.chr6:26046002C>A   | Missense Mutation | HIST1H3C  | p.P122T  | histone cluster 1, H3c 31 (0.00)    | 31 (0.16)  | 0.43 |
| 11-01 | Gp3 | g.chr6:27778141G>T   | Missense Mutation | HIST1H3H  | p.C97F   | histone cluster 1, H3h 23 (0.00)    | 43 (0.19)  | 0.50 |
| 11-01 | Gp3 | g.chr6:143092384C>A  | Missense Mutation | HIVEP2    | p.Q1164H | human immunodeficien 164 (0.00)     | 84 (0.18)  | 0.48 |

|       |     |                      |                   |           |          |                                                         |            |      |
|-------|-----|----------------------|-------------------|-----------|----------|---------------------------------------------------------|------------|------|
| 11-01 | Gp3 | g.chr10:70992584C>T  | Silent            | HKDC1     | p.V97V   | hexokinase domain cont 145 (0.00)                       | 87 (0.22)  | 0.58 |
| 11-01 | Gp3 | g.chr21:38309024C>T  | Missense Mutation | HLCS      | p.G241R  | holocarboxylase synthetase 52 (0.00)                    | 27 (0.30)  | 0.79 |
| 11-01 | Gp3 | g.chr3:129017248G>A  | Missense Mutation | HMCES     | p.D169N  | 5-hydroxymethylcytosine 78 (0.01)                       | 37 (0.22)  | 0.58 |
| 11-01 | Gp3 | g.chr1:186055386A>G  | Missense Mutation | HMCN1     | p.S2965G | hemicentin 1 61 (0.00)                                  | 56 (0.14)  | 0.38 |
| 11-01 | Gp3 | g.chr1:186059988C>A  | Missense Mutation | HMCN1     | p.P3276T | hemicentin 1 28 (0.00)                                  | 34 (0.15)  | 0.39 |
| 11-01 | Gp3 | g.chr1:24128986G>T   | Missense Mutation | HMGCL     | p.S315R  | 3-hydroxymethyl-3-methylglutaryl-CoA synthase 31 (0.00) | 36 (0.17)  | 0.44 |
| 11-01 | Gp3 | g.chr6:55360335G>A   | Missense Mutation | HMGCLL1   | p.P226L  | 3-hydroxymethyl-3-methylglutaryl-CoA synthase 32 (0.00) | 14 (0.36)  | 0.95 |
| 11-01 | Gp3 | g.chr5:149431569C>T  | Silent            | HMGXB3    | p.Y1231Y | HMG box domain containing 35 (0.00)                     | 23 (0.26)  | 0.70 |
| 11-01 | Gp3 | g.chr22:35783031C>T  | Silent            | HMOX1     | p.F166F  | heme oxygenase (decyl) 22 (0.00)                        | 22 (0.36)  | 0.97 |
| 11-01 | Gp3 | g.chr5:177633888G>A  | Silent            | HNRNPAB   | p.G178G  | heterogeneous nuclear ribonucleoprotein A20 (0.00)      | 22 (0.64)  | 1.70 |
| 11-01 | Gp3 | g.chr2:38812866G>A   | Missense Mutation | HNRNPLL   | p.P156S  | heterogeneous nuclear ribonucleoprotein L34 (0.00)      | 14 (0.43)  | 1.14 |
| 11-01 | Gp3 | g.chr14:23745541G>T  | Missense Mutation | HOMEZ     | p.A299D  | homeobox and leucine zipper 66 (0.00)                   | 53 (0.38)  | 1.01 |
| 11-01 | Gp3 | g.chr14:23746049G>A  | Missense Mutation | HOMEZ     | p.R130W  | homeobox and leucine zipper 47 (0.00)                   | 32 (0.16)  | 0.42 |
| 11-01 | Gp3 | g.chr19:12874391C>G  | Missense Mutation | HOOK2     | p.S652T  | hook microtubule-tether 99 (0.00)                       | 77 (0.22)  | 0.59 |
| 11-01 | Gp3 | g.chr7:27238953G>A   | Silent            | HOXA13    | p.G248G  | homeobox A13 21 (0.00)                                  | 54 (0.17)  | 0.44 |
| 11-01 | Gp3 | g.chr17:46690779G>A  | Missense Mutation | HOXB8     | p.R173C  | homeobox B8 41 (0.00)                                   | 72 (0.15)  | 0.41 |
| 11-01 | Gp3 | g.chr12:54350240C>G  | Missense Mutation | HOXC12    | p.L247V  | homeobox C12 101 (0.00)                                 | 82 (0.15)  | 0.39 |
| 11-01 | Gp3 | g.chr16:72110415C>A  | Missense Mutation | HPR       | p.P161H  | haptoglobin-related protein 58 (0.00)                   | 40 (0.45)  | 1.20 |
| 11-01 | Gp3 | g.chr16:72110562C>A  | Missense Mutation | HPR       | p.P210H  | haptoglobin-related protein 67 (0.00)                   | 36 (0.17)  | 0.44 |
| 11-01 | Gp3 | g.chr16:72110906G>A  | Missense Mutation | HPR       | p.V325M  | haptoglobin-related protein 96 (0.00)                   | 52 (0.19)  | 0.51 |
| 11-01 | Gp3 | g.chr10:100202920G>A | Silent            | HPS1      | p.L26L   | Hermansky-Pudlak syndrome 22 (0.00)                     | 18 (0.39)  | 1.04 |
| 11-01 | Gp3 | g.chr5:175111023G>T  | Missense Mutation | HRH2      | p.D263Y  | histamine receptor H2 31 (0.00)                         | 15 (0.33)  | 0.89 |
| 11-01 | Gp3 | g.chr2:20838308C>T   | Missense Mutation | HS1BP3    | p.E171K  | HCLS1 binding protein 21 (0.00)                         | 12 (0.58)  | 1.56 |
| 11-01 | Gp3 | g.chr2:20838346C>T   | Missense Mutation | HS1BP3    | p.S158N  | HCLS1 binding protein 33 (0.00)                         | 29 (0.45)  | 1.20 |
| 11-01 | Gp3 | g.chr2:20840851C>G   | Missense Mutation | HS1BP3    | p.K96N   | HCLS1 binding protein 88 (0.00)                         | 134 (0.15) | 0.40 |
| 11-01 | Gp3 | g.chr16:26147093A>T  | Missense Mutation | HS3ST4    | p.T299S  | heparan sulfate (glucosaminyl) 35 (0.00)                | 25 (0.36)  | 0.96 |
| 11-01 | Gp3 | g.chr16:67470770G>A  | Missense Mutation | HSD11B2   | p.R361H  | hydroxysteroid (11-beta) oxidoreductase 24 (0.00)       | 97 (0.29)  | 0.77 |
| 11-01 | Gp3 | g.chr16:84163943T>A  | Missense Mutation | HSDL1     | p.Q105L  | hydroxysteroid dehydrogenase 73 (0.00)                  | 23 (0.35)  | 0.74 |
| 11-01 | Gp3 | g.chr16:67202957C>A  | Missense Mutation | HSF4      | p.Q403K  | heat shock transcription factor 41 (0.00)               | 35 (0.14)  | 0.38 |
| 11-01 | Gp3 | g.chr4:190395893G>A  | RNA               | HSP90AA4P |          | heat shock protein 90kDa 162 (0.00)                     | 43 (0.16)  | 0.43 |
| 11-01 | Gp3 | g.chr4:190395894A>G  | RNA               | HSP90AA4P |          | heat shock protein 90kDa 161 (0.00)                     | 40 (0.17)  | 0.47 |
| 11-01 | Gp3 | g.chr6:44219757C>T   | Missense Mutation | HSP90AB1  | p.A495V  | heat shock protein 90kDa 97 (0.00)                      | 136 (0.26) | 0.69 |
| 11-01 | Gp3 | g.chr12:104340684C>G | Missense Mutation | HSP90B1   | p.L743V  | heat shock protein 90kDa 53 (0.00)                      | 32 (0.16)  | 0.42 |
| 11-01 | Gp3 | g.chr14:65008910G>A  | Missense Mutation | HSPA2     | p.G448D  | heat shock 70kDa protein 30 (0.00)                      | 25 (0.32)  | 0.85 |
| 11-01 | Gp3 | g.chr9:128001325C>T  | Silent            | HSPA5     | p.R297R  | heat shock 70kDa protein 40 (0.00)                      | 44 (0.20)  | 0.55 |

|       |     |                      |                   |         |          |                                 |            |            |      |
|-------|-----|----------------------|-------------------|---------|----------|---------------------------------|------------|------------|------|
| 11-01 | Gp3 | g.chr13:47466607G>A  | Silent            | HTR2A   | p.I177I  | 5-hydroxytryptamine (serotonin) | 163 (0.00) | 89 (0.17)  | 0.45 |
| 11-01 | Gp3 | g.chrX:114141732G>A  | Silent            | HTR2C   | p.R377R  | 5-hydroxytryptamine (serotonin) | 67 (0.00)  | 44 (0.23)  | 0.38 |
| 11-01 | Gp3 | g.chr4:3208313C>A    | Missense Mutation | HTT     | p.Q1937K | huntingtin                      | 36 (0.00)  | 26 (0.58)  | 1.54 |
| 11-01 | Gp3 | g.chr4:3211581C>A    | Missense Mutation | HTT     | p.Q2107K | huntingtin                      | 131 (0.00) | 51 (0.16)  | 0.42 |
| 11-01 | Gp3 | g.chr4:3237112C>A    | Missense Mutation | HTT     | p.A2853E | huntingtin                      | 27 (0.00)  | 17 (0.29)  | 0.78 |
| 11-01 | Gp3 | g.chr4:3237906C>A    | Nonsense Mutation | HTT     | p.S2939* | huntingtin                      | 86 (0.00)  | 38 (0.26)  | 0.70 |
| 11-01 | Gp3 | g.chrX:53569469C>T   | Missense Mutation | HUWE1   | p.R3804Q | HECT, UBA and WWE22             | 22 (0.00)  | 20 (0.35)  | 0.58 |
| 11-01 | Gp3 | g.chrX:53569486C>T   | Silent            | HUWE1   | p.Q3798Q | HECT, UBA and WWE20             | 20 (0.00)  | 17 (0.35)  | 0.59 |
| 11-01 | Gp3 | g.chrX:53585653C>T   | Missense Mutation | HUWE1   | p.G2708D | HECT, UBA and WWE40             | 40 (0.00)  | 12 (0.42)  | 0.69 |
| 11-01 | Gp3 | g.chr7:123508870C>G  | Silent            | HYAL4   | p.T181T  | hyaluronoglucosaminidase        | 46 (0.00)  | 44 (0.30)  | 0.79 |
| 11-01 | Gp3 | g.chr15:78825824C>A  | Missense Mutation | HYKK    | p.R312S  | hydroxylysine kinase            | 59 (0.00)  | 47 (0.15)  | 0.40 |
| 11-01 | Gp3 | g.chr11:125770022C>A | Silent            | HYLS1   | p.S253S  | hydroletharus syndrome          | 74 (0.00)  | 30 (0.17)  | 0.44 |
| 11-01 | Gp3 | g.chr6:82927854C>A   | Splice Site       | IBTK    | p.V417L  | inhibitor of Bruton agan        | 36 (0.00)  | 31 (0.19)  | 0.52 |
| 11-01 | Gp3 | g.chr2:203644321C>A  | Missense Mutation | ICA1L   | p.D462Y  | islet cell autoantigen 1,672    | 72 (0.00)  | 37 (0.30)  | 0.79 |
| 11-01 | Gp3 | g.chr2:203653633G>T  | Missense Mutation | ICA1L   | p.S388Y  | islet cell autoantigen 1,625    | 25 (0.00)  | 32 (0.16)  | 0.42 |
| 11-01 | Gp3 | g.chr6:52876892G>A   | Missense Mutation | ICK     | p.S429F  | intestinal cell (MAK-like)      | 39 (0.00)  | 29 (0.21)  | 0.55 |
| 11-01 | Gp3 | g.chr15:90630754C>T  | Nonsense Mutation | IDH2    | p.W135*  | isocitrate dehydrogenase        | 53 (0.00)  | 34 (0.24)  | 0.63 |
| 11-01 | Gp3 | g.chr10:1088687G>T   | Missense Mutation | IDI1    | p.T141K  | isopentenyl-diphosphate         | 24 (0.00)  | 26 (0.35)  | 0.92 |
| 11-01 | Gp3 | g.chr10:91178007G>C  | Missense Mutation | IFIT5   | p.G351R  | interferon-induced prote        | 38 (0.00)  | 39 (0.18)  | 0.48 |
| 11-01 | Gp3 | g.chr9:21367522C>A   | Missense Mutation | IFNA13  | p.C163F  | interferon, alpha 13            | 72 (0.01)  | 14 (0.71)  | 1.16 |
| 11-01 | Gp3 | g.chr9:21481134C>A   | Missense Mutation | IFNE    | p.S187I  | interferon, epsilon             | 201 (0.00) | 139 (0.27) | 0.43 |
| 11-01 | Gp3 | g.chr6:137527280G>A  | Silent            | IFNGR1  | p.C122C  | interferon gamma receptor       | 86 (0.00)  | 29 (0.24)  | 0.64 |
| 11-01 | Gp3 | g.chr3:129185759G>T  | Missense Mutation | IFT122  | p.R197I  | intraflagellar transport 153    | 153 (0.00) | 37 (0.51)  | 1.37 |
| 11-01 | Gp3 | g.chr3:129233239C>A  | Missense Mutation | IFT122  | p.L999I  | intraflagellar transport 118    | 118 (0.00) | 25 (0.24)  | 0.64 |
| 11-01 | Gp3 | g.chr20:42247607G>A  | Missense Mutation | IFT52   | p.G214S  | intraflagellar transport 545    | 545 (0.00) | 34 (0.18)  | 0.47 |
| 11-01 | Gp3 | g.chr20:42271264G>A  | Splice Site       | IFT52   | p.Q422Q  | intraflagellar transport 543    | 543 (0.00) | 48 (0.23)  | 0.61 |
| 11-01 | Gp3 | g.chr3:107925528T>A  | Missense Mutation | IFT57   | p.N201Y  | intraflagellar transport 552    | 552 (0.00) | 29 (0.21)  | 0.55 |
| 11-01 | Gp3 | g.chr3:185375078A>G  | Missense Mutation | IGF2BP2 | p.I461T  | insulin-like growth factor      | 35 (0.00)  | 12 (0.42)  | 1.11 |
| 11-01 | Gp3 | g.chr6:160484536G>A  | Missense Mutation | IGF2R   | p.E1254K | insulin-like growth factor      | 61 (0.00)  | 30 (0.17)  | 0.44 |
| 11-01 | Gp3 | g.chr17:38610251C>T  | Silent            | IGFBP4  | p.H193H  | insulin-like growth factor      | 45 (0.00)  | 71 (0.20)  | 0.53 |
| 11-01 | Gp3 | g.chr19:46627402C>A  | Missense Mutation | IGFL3   | p.G31C   | IGF-like family member          | 64 (0.00)  | 25 (0.28)  | 0.75 |
| 11-01 | Gp3 | g.chr19:46627552G>T  | Missense Mutation | IGFL3   | p.L18I   | IGF-like family member          | 50 (0.00)  | 30 (0.33)  | 0.89 |
| 11-01 | Gp3 | g.chr1:201169501C>A  | Missense Mutation | IGFN1   | p.Q199K  | immunoglobulin-like an          | 24 (0.00)  | 17 (0.35)  | 0.94 |
| 11-01 | Gp3 | g.chr14:106091465C>A | RNA               | IGHG4   |          | immunoglobulin heavy chain      | 19 (0.00)  | 24 (0.29)  | 0.78 |
| 11-01 | Gp3 | g.chr11:68705728G>A  | Missense Mutation | IGHMBP2 | p.C897Y  | immunoglobulin mu chain         | 27 (0.00)  | 24 (0.38)  | 1.00 |



|       |     |                      |                   |             |          |                            |            |            |      |
|-------|-----|----------------------|-------------------|-------------|----------|----------------------------|------------|------------|------|
| 11-01 | Gp3 | g.chr15:22448537C>A  | RNA               | IGHV1OR15-1 |          | immunoglobulin heavy       | 46 (0.00)  | 30 (0.20)  | 0.53 |
| 11-01 | Gp3 | g.chr14:106926273G>A | RNA               | IGHV3-43    |          | immunoglobulin heavy       | 54 (0.00)  | 37 (0.54)  | 1.44 |
| 11-01 | Gp3 | g.chr2:89417305C>A   | RNA               | IGKV1-17    |          | immunoglobulin kappa       | 93 (0.00)  | 34 (0.15)  | 0.39 |
| 11-01 | Gp3 | g.chr2:90192965C>A   | RNA               | IGKV1D-13   |          | immunoglobulin kappa       | 65 (0.00)  | 40 (0.28)  | 0.73 |
| 11-01 | Gp3 | g.chr2:89459317C>A   | RNA               | IGKV6-21    |          | immunoglobulin kappa       | 52 (0.00)  | 66 (0.17)  | 0.44 |
| 11-01 | Gp3 | g.chr22:22764343G>C  | RNA               | IGLV1-40    |          | immunoglobulin lambda      | 70 (0.00)  | 52 (0.21)  | 0.56 |
| 11-01 | Gp3 | g.chrX:130412616C>A  | Missense Mutation | IGSF1       | p.K611N  | immunoglobulin superfa     | 25 (0.00)  | 15 (0.47)  | 0.78 |
| 11-01 | Gp3 | g.chr3:151163182G>A  | Silent            | IGSF10      | p.H1529H | immunoglobulin superfa     | 64 (0.00)  | 34 (0.15)  | 0.39 |
| 11-01 | Gp3 | g.chr3:151164485G>T  | Missense Mutation | IGSF10      | p.A1095D | immunoglobulin superfa     | 26 (0.00)  | 26 (0.27)  | 0.72 |
| 11-01 | Gp3 | g.chr11:18738428T>C  | Missense Mutation | IGSF22      | p.K365E  | immunoglobulin superfa     | 68 (0.00)  | 46 (0.17)  | 0.46 |
| 11-01 | Gp3 | g.chr11:18741429G>A  | Missense Mutation | IGSF22      | p.A177V  | immunoglobulin superfa     | 108 (0.00) | 83 (0.24)  | 0.64 |
| 11-01 | Gp3 | g.chr5:140037180G>T  | Missense Mutation | IK          | p.K281N  | IK cytokine, down-regu     | 146 (0.00) | 46 (0.20)  | 0.52 |
| 11-01 | Gp3 | g.chr9:111653606C>A  | Missense Mutation | IKBKAP      | p.G1013C | inhibitor of kappa light   | 163 (0.00) | 71 (0.20)  | 0.53 |
| 11-01 | Gp3 | g.chr9:111668667C>G  | Missense Mutation | IKBKAP      | p.S520T  | inhibitor of kappa light   | 136 (0.00) | 28 (0.18)  | 0.48 |
| 11-01 | Gp3 | g.chr12:56428465G>C  | Missense Mutation | IKZF4       | p.G325R  | IKAROS family zinc fir     | 58 (0.00)  | 21 (0.33)  | 0.89 |
| 11-01 | Gp3 | g.chr5:158745788G>A  | Silent            | IL12B       | p.L271L  | interleukin 12B            | 97 (0.01)  | 36 (0.17)  | 0.44 |
| 11-01 | Gp3 | g.chr1:67833543G>C   | Missense Mutation | IL12RB2     | p.E432Q  | interleukin 12 receptor,   | 195 (0.00) | 129 (0.17) | 0.45 |
| 11-01 | Gp3 | g.chr15:81601120C>T  | Missense Mutation | IL16        | p.T1326I | interleukin 16             | 61 (0.00)  | 22 (0.27)  | 0.73 |
| 11-01 | Gp3 | g.chr13:21295985C>T  | Silent            | IL17D       | p.C167C  | interleukin 17D            | 16 (0.00)  | 32 (0.25)  | 0.67 |
| 11-01 | Gp3 | g.chr3:9965629G>T    | Missense Mutation | IL17RC      | p.E300D  | interleukin 17 receptor    | 21 (0.00)  | 29 (0.17)  | 0.46 |
| 11-01 | Gp3 | g.chr3:57130498G>A   | Missense Mutation | IL17RD      | p.L715F  | interleukin 17 receptor I  | 107 (0.00) | 95 (0.18)  | 0.48 |
| 11-01 | Gp3 | g.chr3:57132109G>A   | Missense Mutation | IL17RD      | p.S541F  | interleukin 17 receptor I  | 24 (0.00)  | 11 (0.55)  | 1.45 |
| 11-01 | Gp3 | g.chr3:9950957G>A    | Nonsense Mutation | IL17RE      | p.W264*  | interleukin 17 receptor I  | 40 (0.03)  | 24 (0.21)  | 0.56 |
| 11-01 | Gp3 | g.chr2:113591039C>A  | Missense Mutation | IL1B        | p.M71I   | interleukin 1, beta        | 46 (0.00)  | 31 (0.45)  | 1.20 |
| 11-01 | Gp3 | g.chr3:190326927G>A  | Missense Mutation | IL1RAP      | p.G165E  | interleukin 1 receptor ac  | 16 (0.00)  | 17 (0.53)  | 1.41 |
| 11-01 | Gp3 | g.chr3:190341152G>T  | Silent            | IL1RAP      | p.V241V  | interleukin 1 receptor ac  | 25 (0.00)  | 15 (0.40)  | 1.07 |
| 11-01 | Gp3 | g.chr2:102851377G>T  | Nonsense Mutation | IL1RL2      | p.E440*  | interleukin 1 receptor-lil | 65 (0.02)  | 26 (0.35)  | 0.92 |
| 11-01 | Gp3 | g.chr6:137322745G>A  | Missense Mutation | IL20RA      | p.L538F  | interleukin 20 receptor,   | 103 (0.00) | 51 (0.31)  | 0.84 |
| 11-01 | Gp3 | g.chr4:123536976G>T  | Nonsense Mutation | IL21        | p.S74*   | interleukin 21             | 38 (0.00)  | 35 (0.14)  | 0.38 |
| 11-01 | Gp3 | g.chr12:56733768C>G  | Silent            | IL23A       | p.L150L  | interleukin 23, alpha su   | 27 (0.00)  | 12 (0.58)  | 1.56 |
| 11-01 | Gp3 | g.chr19:14153267G>A  | Silent            | IL27RA      | p.L179L  | interleukin 27 receptor,   | 49 (0.00)  | 30 (0.47)  | 1.24 |
| 11-01 | Gp3 | g.chr5:131398045G>A  | Missense Mutation | IL3         | p.R82K   | interleukin 3              | 149 (0.01) | 75 (0.25)  | 0.68 |
| 11-01 | Gp3 | g.chr5:55204208C>A   | Silent            | IL31RA      | p.I490I  | interleukin 31 receptor    | 62 (0.00)  | 53 (0.17)  | 0.45 |
| 11-01 | Gp3 | g.chr5:55212936G>A   | Silent            | IL31RA      | p.K761K  | interleukin 31 receptor    | 71 (0.00)  | 25 (0.44)  | 1.17 |
| 11-01 | Gp3 | g.chr5:55237352G>A   | Missense Mutation | IL6ST       | p.P772L  | interleukin 6 signal tran  | 38 (0.00)  | 29 (0.24)  | 0.64 |

|       |     |                     |                   |        |          |                                 |            |            |      |
|-------|-----|---------------------|-------------------|--------|----------|---------------------------------|------------|------------|------|
| 11-01 | Gp3 | g.chr7:128034653G>A | Splice Site       | IMPDH1 | p.S427S  | IMP (inosine 5'-monophosphate)  | 44 (0.00)  | 24 (0.33)  | 0.89 |
| 11-01 | Gp3 | g.chr6:76731869G>A  | Silent            | IMPG1  | p.L210L  | interphotoreceptor matrix       | 56 (0.00)  | 13 (0.46)  | 1.23 |
| 11-01 | Gp3 | g.chr1:62594604G>A  | Missense Mutation | INADL  | p.R1753H | InaD-like (Drosophila)          | 127 (0.00) | 93 (0.17)  | 0.46 |
| 11-01 | Gp3 | g.chr11:61912726C>A | Missense Mutation | INCENP | p.Q601K  | inner centromere protein        | 52 (0.02)  | 74 (0.18)  | 0.47 |
| 11-01 | Gp3 | g.chr7:41729275C>T  | Missense Mutation | INHBA  | p.M418I  | inhibin, beta A                 | 66 (0.00)  | 30 (0.20)  | 0.53 |
| 11-01 | Gp3 | g.chr15:41319799G>C | Missense Mutation | INO80  | p.P1015A | INO80 complex subunit           | 36 (0.00)  | 24 (0.42)  | 1.11 |
| 11-01 | Gp3 | g.chr2:206872033G>C | Missense Mutation | INO80D | p.D631E  | INO80 complex subunit           | 53 (0.00)  | 41 (0.44)  | 1.17 |
| 11-01 | Gp3 | g.chr2:99152594G>T  | Missense Mutation | INPP4A | p.M130I  | inositol polyphosphate- $\zeta$ | 29 (0.00)  | 24 (0.38)  | 1.00 |
| 11-01 | Gp3 | g.chr4:142950446G>T | Intron            | INPP4B |          | inositol polyphosphate- $\zeta$ | 50 (0.00)  | 20 (0.40)  | 1.07 |
| 11-01 | Gp3 | g.chr4:142956004G>T | Intron            | INPP4B |          | inositol polyphosphate- $\zeta$ | 61 (0.02)  | 39 (0.18)  | 0.48 |
| 11-01 | Gp3 | g.chr4:142961873C>T | Intron            | INPP4B |          | inositol polyphosphate- $\zeta$ | 52 (0.00)  | 61 (0.18)  | 0.48 |
| 11-01 | Gp3 | g.chr4:142965031G>A | Intron            | INPP4B |          | inositol polyphosphate- $\zeta$ | 87 (0.00)  | 87 (0.22)  | 0.58 |
| 11-01 | Gp3 | g.chr4:142983390G>T | Intron            | INPP4B |          | inositol polyphosphate- $\zeta$ | 259 (0.00) | 226 (0.26) | 0.70 |
| 11-01 | Gp3 | g.chr4:142997217G>T | Intron            | INPP4B |          | inositol polyphosphate- $\zeta$ | 46 (0.00)  | 54 (0.22)  | 0.59 |
| 11-01 | Gp3 | g.chr4:143006417G>C | Intron            | INPP4B |          | inositol polyphosphate- $\zeta$ | 51 (0.00)  | 33 (0.18)  | 0.48 |
| 11-01 | Gp3 | g.chr4:143006453C>T | Intron            | INPP4B |          | inositol polyphosphate- $\zeta$ | 51 (0.00)  | 34 (0.29)  | 0.78 |
| 11-01 | Gp3 | g.chr4:143021486C>A | Intron            | INPP4B |          | inositol polyphosphate- $\zeta$ | 84 (0.00)  | 34 (0.15)  | 0.39 |
| 11-01 | Gp3 | g.chr4:143029161G>C | Intron            | INPP4B |          | inositol polyphosphate- $\zeta$ | 67 (0.00)  | 15 (0.40)  | 1.07 |
| 11-01 | Gp3 | g.chr4:143031801C>T | Intron            | INPP4B |          | inositol polyphosphate- $\zeta$ | 60 (0.00)  | 33 (0.18)  | 0.48 |
| 11-01 | Gp3 | g.chr4:143031810C>T | Intron            | INPP4B |          | inositol polyphosphate- $\zeta$ | 62 (0.00)  | 31 (0.19)  | 0.52 |
| 11-01 | Gp3 | g.chr4:143043362C>A | Missense Mutation | INPP4B | p.G685V  | inositol polyphosphate- $\zeta$ | 54 (0.00)  | 10 (0.60)  | 1.60 |
| 11-01 | Gp3 | g.chr4:143044720G>A | Intron            | INPP4B |          | inositol polyphosphate- $\zeta$ | 42 (0.00)  | 17 (0.29)  | 0.78 |
| 11-01 | Gp3 | g.chr4:143047819C>T | Intron            | INPP4B |          | inositol polyphosphate- $\zeta$ | 59 (0.00)  | 37 (0.16)  | 0.43 |
| 11-01 | Gp3 | g.chr4:143053592A>T | Intron            | INPP4B |          | inositol polyphosphate- $\zeta$ | 32 (0.00)  | 27 (0.22)  | 0.59 |
| 11-01 | Gp3 | g.chr4:143057588C>T | Intron            | INPP4B |          | inositol polyphosphate- $\zeta$ | 71 (0.00)  | 45 (0.24)  | 0.65 |
| 11-01 | Gp3 | g.chr4:143067854G>T | Intron            | INPP4B |          | inositol polyphosphate- $\zeta$ | 106 (0.00) | 43 (0.28)  | 0.74 |
| 11-01 | Gp3 | g.chr4:143101044G>A | Intron            | INPP4B |          | inositol polyphosphate- $\zeta$ | 255 (0.00) | 150 (0.15) | 0.39 |
| 11-01 | Gp3 | g.chr4:143105372A>G | Intron            | INPP4B |          | inositol polyphosphate- $\zeta$ | 40 (0.00)  | 25 (0.32)  | 0.85 |
| 11-01 | Gp3 | g.chr4:143117806G>T | Intron            | INPP4B |          | inositol polyphosphate- $\zeta$ | 61 (0.00)  | 53 (0.15)  | 0.40 |
| 11-01 | Gp3 | g.chr4:143121580C>T | Intron            | INPP4B |          | inositol polyphosphate- $\zeta$ | 83 (0.00)  | 29 (0.17)  | 0.46 |
| 11-01 | Gp3 | g.chr4:143160185G>A | Intron            | INPP4B |          | inositol polyphosphate- $\zeta$ | 87 (0.01)  | 52 (0.15)  | 0.41 |
| 11-01 | Gp3 | g.chr4:143160212C>G | Intron            | INPP4B |          | inositol polyphosphate- $\zeta$ | 57 (0.02)  | 41 (0.17)  | 0.46 |
| 11-01 | Gp3 | g.chr4:143169166G>T | Intron            | INPP4B |          | inositol polyphosphate- $\zeta$ | 52 (0.00)  | 38 (0.18)  | 0.49 |
| 11-01 | Gp3 | g.chr4:143174439G>A | Intron            | INPP4B |          | inositol polyphosphate- $\zeta$ | 82 (0.00)  | 57 (0.16)  | 0.42 |
| 11-01 | Gp3 | g.chr4:143184415C>A | Intron            | INPP4B |          | inositol polyphosphate- $\zeta$ | 70 (0.00)  | 25 (0.20)  | 0.53 |

|       |     |                     |        |        |                                            |            |      |
|-------|-----|---------------------|--------|--------|--------------------------------------------|------------|------|
| 11-01 | Gp3 | g.chr4:143185249G>A | Intron | INPP4B | inositol polyphosphate- $\zeta$ 81 (0.00)  | 23 (0.22)  | 0.58 |
| 11-01 | Gp3 | g.chr4:143204706C>T | Intron | INPP4B | inositol polyphosphate- $\zeta$ 36 (0.00)  | 37 (0.24)  | 0.65 |
| 11-01 | Gp3 | g.chr4:143206519C>G | Intron | INPP4B | inositol polyphosphate- $\zeta$ 36 (0.00)  | 26 (0.35)  | 0.92 |
| 11-01 | Gp3 | g.chr4:143236596C>T | Intron | INPP4B | inositol polyphosphate- $\zeta$ 75 (0.01)  | 50 (0.22)  | 0.59 |
| 11-01 | Gp3 | g.chr4:143269979G>T | Intron | INPP4B | inositol polyphosphate- $\zeta$ 38 (0.00)  | 35 (0.26)  | 0.69 |
| 11-01 | Gp3 | g.chr4:143269990C>T | Intron | INPP4B | inositol polyphosphate- $\zeta$ 40 (0.00)  | 35 (0.20)  | 0.53 |
| 11-01 | Gp3 | g.chr4:143276581T>A | Intron | INPP4B | inositol polyphosphate- $\zeta$ 34 (0.00)  | 22 (0.55)  | 1.45 |
| 11-01 | Gp3 | g.chr4:143289115G>C | Intron | INPP4B | inositol polyphosphate- $\zeta$ 51 (0.00)  | 35 (0.37)  | 0.99 |
| 11-01 | Gp3 | g.chr4:143319192G>A | Intron | INPP4B | inositol polyphosphate- $\zeta$ 53 (0.00)  | 37 (0.27)  | 0.72 |
| 11-01 | Gp3 | g.chr4:143323254C>A | Intron | INPP4B | inositol polyphosphate- $\zeta$ 99 (0.00)  | 41 (0.15)  | 0.39 |
| 11-01 | Gp3 | g.chr4:143324268G>A | Intron | INPP4B | inositol polyphosphate- $\zeta$ 53 (0.00)  | 20 (0.30)  | 0.80 |
| 11-01 | Gp3 | g.chr4:143327970G>A | Intron | INPP4B | inositol polyphosphate- $\zeta$ 62 (0.00)  | 54 (0.15)  | 0.40 |
| 11-01 | Gp3 | g.chr4:143328971A>G | Intron | INPP4B | inositol polyphosphate- $\zeta$ 92 (0.00)  | 31 (0.16)  | 0.43 |
| 11-01 | Gp3 | g.chr4:143332643C>T | Intron | INPP4B | inositol polyphosphate- $\zeta$ 107 (0.01) | 78 (0.18)  | 0.48 |
| 11-01 | Gp3 | g.chr4:143370256T>C | Intron | INPP4B | inositol polyphosphate- $\zeta$ 83 (0.01)  | 85 (0.16)  | 0.44 |
| 11-01 | Gp3 | g.chr4:143387319G>A | Intron | INPP4B | inositol polyphosphate- $\zeta$ 87 (0.00)  | 50 (0.16)  | 0.43 |
| 11-01 | Gp3 | g.chr4:143424065A>G | Intron | INPP4B | inositol polyphosphate- $\zeta$ 42 (0.00)  | 11 (0.45)  | 1.21 |
| 11-01 | Gp3 | g.chr4:143426572G>A | Intron | INPP4B | inositol polyphosphate- $\zeta$ 49 (0.00)  | 43 (0.19)  | 0.50 |
| 11-01 | Gp3 | g.chr4:143429289G>A | Intron | INPP4B | inositol polyphosphate- $\zeta$ 63 (0.00)  | 68 (0.15)  | 0.39 |
| 11-01 | Gp3 | g.chr4:143438888C>T | Intron | INPP4B | inositol polyphosphate- $\zeta$ 111 (0.00) | 49 (0.16)  | 0.44 |
| 11-01 | Gp3 | g.chr4:143458252C>T | Intron | INPP4B | inositol polyphosphate- $\zeta$ 88 (0.00)  | 35 (0.20)  | 0.53 |
| 11-01 | Gp3 | g.chr4:143465613C>G | Intron | INPP4B | inositol polyphosphate- $\zeta$ 37 (0.00)  | 33 (0.64)  | 1.70 |
| 11-01 | Gp3 | g.chr4:143470430C>G | Intron | INPP4B | inositol polyphosphate- $\zeta$ 44 (0.02)  | 10 (0.50)  | 1.33 |
| 11-01 | Gp3 | g.chr4:143475809T>A | Intron | INPP4B | inositol polyphosphate- $\zeta$ 112 (0.01) | 64 (0.27)  | 0.71 |
| 11-01 | Gp3 | g.chr4:143481307C>A | Intron | INPP4B | inositol polyphosphate- $\zeta$ 36 (0.00)  | 26 (0.65)  | 1.74 |
| 11-01 | Gp3 | g.chr4:143487073G>A | Intron | INPP4B | inositol polyphosphate- $\zeta$ 70 (0.00)  | 12 (0.50)  | 1.33 |
| 11-01 | Gp3 | g.chr4:143487871C>A | Intron | INPP4B | inositol polyphosphate- $\zeta$ 103 (0.00) | 63 (0.16)  | 0.42 |
| 11-01 | Gp3 | g.chr4:143492128G>T | Intron | INPP4B | inositol polyphosphate- $\zeta$ 45 (0.00)  | 46 (0.28)  | 0.75 |
| 11-01 | Gp3 | g.chr4:143498451C>A | Intron | INPP4B | inositol polyphosphate- $\zeta$ 39 (0.03)  | 15 (0.47)  | 1.24 |
| 11-01 | Gp3 | g.chr4:143504762G>T | Intron | INPP4B | inositol polyphosphate- $\zeta$ 51 (0.00)  | 37 (0.30)  | 0.79 |
| 11-01 | Gp3 | g.chr4:143511240G>A | Intron | INPP4B | inositol polyphosphate- $\zeta$ 283 (0.00) | 288 (0.18) | 0.48 |
| 11-01 | Gp3 | g.chr4:143520126G>A | Intron | INPP4B | inositol polyphosphate- $\zeta$ 32 (0.00)  | 62 (0.27)  | 0.73 |
| 11-01 | Gp3 | g.chr4:143544647G>T | Intron | INPP4B | inositol polyphosphate- $\zeta$ 29 (0.00)  | 22 (0.23)  | 0.61 |
| 11-01 | Gp3 | g.chr4:143577577C>T | Intron | INPP4B | inositol polyphosphate- $\zeta$ 42 (0.00)  | 24 (0.54)  | 1.44 |
| 11-01 | Gp3 | g.chr4:143578173C>G | Intron | INPP4B | inositol polyphosphate- $\zeta$ 27 (0.00)  | 29 (0.21)  | 0.55 |

|       |     |                      |                   |             |          |                                    |            |      |
|-------|-----|----------------------|-------------------|-------------|----------|------------------------------------|------------|------|
| 11-01 | Gp3 | g.chr4:143588413C>T  | Intron            | INPP4B      |          | inositol polyphosphate-41 (0.00)   | 45 (0.31)  | 0.83 |
| 11-01 | Gp3 | g.chr4:143602706G>A  | Intron            | INPP4B      |          | inositol polyphosphate-47 (0.00)   | 57 (0.18)  | 0.47 |
| 11-01 | Gp3 | g.chr4:143617513G>A  | Intron            | INPP4B      |          | inositol polyphosphate-56 (0.00)   | 28 (0.18)  | 0.48 |
| 11-01 | Gp3 | g.chr4:143653369G>A  | Intron            | INPP4B      |          | inositol polyphosphate-29 (0.00)   | 13 (0.38)  | 1.03 |
| 11-01 | Gp3 | g.chr4:143664070G>A  | Intron            | INPP4B      |          | inositol polyphosphate-30 (0.00)   | 35 (0.14)  | 0.38 |
| 11-01 | Gp3 | g.chr4:143675191G>A  | Intron            | INPP4B      |          | inositol polyphosphate-37 (0.00)   | 31 (0.16)  | 0.43 |
| 11-01 | Gp3 | g.chr4:143689289G>A  | Intron            | INPP4B      |          | inositol polyphosphate-108 (0.00)  | 26 (0.38)  | 1.03 |
| 11-01 | Gp3 | g.chr4:143698258C>A  | Intron            | INPP4B      |          | inositol polyphosphate-106 (0.00)  | 44 (0.18)  | 0.48 |
| 11-01 | Gp3 | g.chr4:143700731G>A  | Intron            | INPP4B      |          | inositol polyphosphate-117 (0.00)  | 97 (0.14)  | 0.38 |
| 11-01 | Gp3 | g.chr4:143715379G>A  | Intron            | INPP4B      |          | inositol polyphosphate-21 (0.00)   | 18 (0.56)  | 1.48 |
| 11-01 | Gp3 | g.chr4:143719631C>A  | Intron            | INPP4B      |          | inositol polyphosphate-17 (0.00)   | 22 (0.27)  | 0.73 |
| 11-01 | Gp3 | g.chr4:143744298C>T  | Intron            | INPP4B      |          | inositol polyphosphate-92 (0.00)   | 27 (0.19)  | 0.49 |
| 11-01 | Gp3 | g.chr4:143745379G>A  | Intron            | INPP4B      |          | inositol polyphosphate-55 (0.00)   | 17 (0.29)  | 0.78 |
| 11-01 | Gp3 | g.chr4:143746908G>A  | Intron            | INPP4B      |          | inositol polyphosphate-180 (0.00)  | 110 (0.15) | 0.41 |
| 11-01 | Gp3 | g.chr4:143750320T>C  | Intron            | INPP4B      |          | inositol polyphosphate-34 (0.00)   | 25 (0.64)  | 1.71 |
| 11-01 | Gp3 | g.chr4:143765787G>T  | Intron            | INPP4B      |          | inositol polyphosphate-106 (0.00)  | 85 (0.20)  | 0.53 |
| 11-01 | Gp3 | g.chr1:38353933G>A   | Missense Mutation | INPP5B      | p.P294L  | inositol polyphosphate-29 (0.00)   | 33 (0.15)  | 0.40 |
| 11-01 | Gp3 | g.chr1:38353983C>G   | Missense Mutation | INPP5B      | p.Q277H  | inositol polyphosphate-28 (0.00)   | 33 (0.21)  | 0.57 |
| 11-01 | Gp3 | g.chr17:60002426G>A  | Silent            | INTS2       | p.L110L  | integrator complex subu134 (0.00)  | 76 (0.28)  | 0.74 |
| 11-01 | Gp3 | g.chr1:153745729G>A  | Missense Mutation | INTS3       | p.G1038S | integrator complex subu95 (0.00)   | 32 (0.16)  | 0.42 |
| 11-01 | Gp3 | g.chr7:65173473C>A   | RNA               | INTS4L2     |          | integrator complex subu34 (0.03)   | 39 (0.18)  | 0.48 |
| 11-01 | Gp3 | g.chr4:128637517G>T  | Missense Mutation | INTU        | p.V919F  | inturned planar cell pola28 (0.00) | 25 (0.24)  | 0.64 |
| 11-01 | Gp3 | g.chr13:98637686G>A  | Missense Mutation | IPO5        | p.M61I   | importin 5 76 (0.00)               | 41 (0.20)  | 0.52 |
| 11-01 | Gp3 | g.chr13:98637699C>A  | Missense Mutation | IPO5        | p.L66I   | importin 5 81 (0.00)               | 41 (0.32)  | 0.85 |
| 11-01 | Gp3 | g.chr12:30802127C>T  | Missense Mutation | IPO8        | p.A533T  | importin 8 89 (0.01)               | 63 (0.14)  | 0.38 |
| 11-01 | Gp3 | g.chr2:237246950C>A  | Missense Mutation | IQCA1       | p.V678L  | IQ motif containing witl117 (0.00) | 46 (0.22)  | 0.58 |
| 11-01 | Gp3 | g.chr2:237272521C>A  | Nonsense Mutation | IQCA1       | p.E591*  | IQ motif containing witl76 (0.00)  | 76 (0.32)  | 0.84 |
| 11-01 | Gp3 | g.chr2:237272526C>A  | Missense Mutation | IQCA1       | p.C589F  | IQ motif containing witl74 (0.00)  | 74 (0.31)  | 0.83 |
| 11-01 | Gp3 | g.chr12:113633544C>A | Nonsense Mutation | IQCD        | p.E294*  | IQ motif containing D 39 (0.00)    | 23 (0.26)  | 0.70 |
| 11-01 | Gp3 | g.chr3:159604056C>T  | Silent            | IQCJ-SCHIP1 | p.D273D  | IQCJ-SCHIP1 readthrou50 (0.00)     | 29 (0.24)  | 0.64 |
| 11-01 | Gp3 | g.chr16:19741781G>A  | Missense Mutation | IQCK        | p.E71K   | IQ motif containing K 31 (0.00)    | 42 (0.29)  | 0.76 |
| 11-01 | Gp3 | g.chr15:91019945G>A  | Silent            | IQGAP1      | p.L945L  | IQ motif containing GT197 (0.00)   | 53 (0.32)  | 0.86 |
| 11-01 | Gp3 | g.chr1:156505014C>T  | Missense Mutation | IQGAP3      | p.V1150I | IQ motif containing GT166 (0.00)   | 142 (0.20) | 0.54 |
| 11-01 | Gp3 | g.chr3:10251293C>A   | Missense Mutation | IRAK2       | p.H149N  | interleukin-1 receptor-a:23 (0.00) | 16 (0.31)  | 0.83 |
| 11-01 | Gp3 | g.chr4:185309945C>T  | Silent            | IRF2        | p.S339S  | interferon regulatory fac51 (0.00) | 14 (0.36)  | 0.95 |

|       |     |                      |                   |             |          |                                 |            |            |      |
|-------|-----|----------------------|-------------------|-------------|----------|---------------------------------|------------|------------|------|
| 11-01 | Gp3 | g.chr16:47196555C>A  | Missense Mutation | ITFG1       | p.A492S  | integrin alpha FG-GAP           | 51 (0.00)  | 43 (0.28)  | 0.74 |
| 11-01 | Gp3 | g.chr5:52160873C>T   | Silent            | ITGA1       | p.V151V  | integrin, alpha 1               | 79 (0.01)  | 55 (0.20)  | 0.53 |
| 11-01 | Gp3 | g.chr1:145530383G>A  | Missense Mutation | ITGA10      | p.E200K  | integrin, alpha 10              | 70 (0.00)  | 79 (0.18)  | 0.47 |
| 11-01 | Gp3 | g.chr1:145535883C>T  | Missense Mutation | ITGA10      | p.R691C  | integrin, alpha 10              | 58 (0.00)  | 13 (0.46)  | 1.23 |
| 11-01 | Gp3 | g.chr17:48154801G>A  | Missense Mutation | ITGA3       | p.R710Q  | integrin, alpha 3 (antigen 37)  | 37 (0.00)  | 39 (0.15)  | 0.41 |
| 11-01 | Gp3 | g.chr17:48155574G>A  | Silent            | ITGA3       | p.S741S  | integrin, alpha 3 (antigen 37)  | 69 (0.00)  | 62 (0.35)  | 0.95 |
| 11-01 | Gp3 | g.chr2:173339739C>A  | Missense Mutation | ITGA6       | p.Q357K  | integrin, alpha 6               | 24 (0.00)  | 13 (0.54)  | 1.44 |
| 11-01 | Gp3 | g.chr10:15714677C>T  | Missense Mutation | ITGA8       | p.A250T  | integrin, alpha 8               | 55 (0.00)  | 33 (0.36)  | 0.97 |
| 11-01 | Gp3 | g.chr17:3620025C>T   | Missense Mutation | ITGAE       | p.G1134D | integrin, alpha E (antigen 183) | 183 (0.00) | 89 (0.24)  | 0.63 |
| 11-01 | Gp3 | g.chr16:31288342G>A  | Silent            | ITGAM       | p.V395V  | integrin, alpha M (comp)        | 21 (0.00)  | 28 (0.21)  | 0.57 |
| 11-01 | Gp3 | g.chr2:187532428G>A  | Silent            | ITGAV       | p.P786P  | integrin, alpha V               | 98 (0.01)  | 31 (0.26)  | 0.69 |
| 11-01 | Gp3 | g.chr7:20438579G>A   | Missense Mutation | ITGB8       | p.G415S  | integrin, beta 8                | 27 (0.00)  | 20 (0.25)  | 0.67 |
| 11-01 | Gp3 | g.chr3:52833884C>G   | Missense Mutation | ITIH3       | p.P341R  | inter-alpha-trypsin inhib       | 63 (0.02)  | 49 (0.14)  | 0.38 |
| 11-01 | Gp3 | g.chr10:7621720G>C   | Missense Mutation | ITIH5       | p.I472M  | inter-alpha-trypsin inhib       | 28 (0.00)  | 17 (0.47)  | 1.25 |
| 11-01 | Gp3 | g.chr12:26752200G>C  | Missense Mutation | ITPR2       | p.Q1294E | inositol 1,4,5-trisphosph       | 66 (0.00)  | 46 (0.26)  | 0.70 |
| 11-01 | Gp3 | g.chr21:35134278T>A  | Missense Mutation | ITSN1       | p.L259Q  | intersectin 1 (SH3 domain)      | 76 (0.00)  | 52 (0.15)  | 0.41 |
| 11-01 | Gp3 | g.chr2:24484463G>A   | Missense Mutation | ITSN2       | p.T835I  | intersectin 2                   | 48 (0.00)  | 75 (0.16)  | 0.43 |
| 11-01 | Gp3 | g.chr6:150715381C>T  | Missense Mutation | IYD         | p.A226V  | iodotyrosine deiodinase         | 78 (0.00)  | 44 (0.18)  | 0.48 |
| 11-01 | Gp3 | g.chr1:65344806G>A   | Silent            | JAK1        | p.L77L   | Janus kinase 1                  | 50 (0.00)  | 47 (0.36)  | 0.96 |
| 11-01 | Gp3 | g.chr10:133961531G>A | Missense Mutation | JAKMIP3     | p.E609K  | Janus kinase and microtub       | 21 (0.00)  | 23 (0.30)  | 0.81 |
| 11-01 | Gp3 | g.chr7:27872454C>G   | Missense Mutation | JAZF1       | p.V233L  | JAZF zinc finger 1              | 74 (0.00)  | 39 (0.31)  | 0.82 |
| 11-01 | Gp3 | g.chr15:42136678G>A  | Missense Mutation | JMJD7-PLA2C | p.V528I  | JMJD7-PLA2G4B read              | 148 (0.00) | 145 (0.15) | 0.40 |
| 11-01 | Gp3 | g.chr3:124196149C>A  | Missense Mutation | KALRN       | p.L1385I | kalirin, RhoGEF kinase          | 52 (0.02)  | 31 (0.23)  | 0.60 |
| 11-01 | Gp3 | g.chr3:124398380G>C  | Missense Mutation | KALRN       | p.V82L   | kalirin, RhoGEF kinase          | 36 (0.00)  | 26 (0.35)  | 0.92 |
| 11-01 | Gp3 | g.chr9:732573G>A     | Missense Mutation | KANK1       | p.M1067I | KN motif and ankyrin re         | 139 (0.00) | 62 (0.26)  | 0.41 |
| 11-01 | Gp3 | g.chr12:49065666C>T  | Missense Mutation | KANSL2      | p.D209N  | KAT8 regulatory NSL c           | 196 (0.00) | 104 (0.17) | 0.46 |
| 11-01 | Gp3 | g.chr2:97270020G>T   | Missense Mutation | KANSL3      | p.L706M  | KAT8 regulatory NSL c           | 30 (0.00)  | 15 (0.47)  | 1.24 |
| 11-01 | Gp3 | g.chr10:76602934T>A  | Missense Mutation | KAT6B       | p.W107R  | K(lysine) acetyltransfer        | 62 (0.00)  | 71 (0.31)  | 0.83 |
| 11-01 | Gp3 | g.chr13:41705491G>T  | Missense Mutation | KBTBD6      | p.A386D  | kelch repeat and BTB (F         | 79 (0.00)  | 42 (0.17)  | 0.44 |
| 11-01 | Gp3 | g.chr3:67054609C>T   | Silent            | KBTBD8      | p.N406N  | kelch repeat and BTB (F         | 66 (0.00)  | 47 (0.17)  | 0.45 |
| 11-01 | Gp3 | g.chr11:30032321G>A  | Silent            | KCNA4       | p.D635D  | potassium voltage-gated         | 62 (0.00)  | 35 (0.49)  | 1.30 |
| 11-01 | Gp3 | g.chr19:49573971G>A  | Silent            | KCNA7       | p.N240N  | potassium voltage-gated         | 48 (0.00)  | 48 (0.17)  | 0.44 |
| 11-01 | Gp3 | g.chr1:6145265G>A    | Splice Site       | KCNAB2      | p.A95T   | potassium voltage-gated         | 37 (0.00)  | 14 (0.36)  | 0.95 |
| 11-01 | Gp3 | g.chr20:47990765G>A  | Silent            | KCNB1       | p.S444S  | potassium voltage-gated         | 29 (0.00)  | 30 (0.43)  | 1.16 |
| 11-01 | Gp3 | g.chr20:47991481G>A  | Silent            | KCNB1       | p.L206L  | potassium voltage-gated         | 43 (0.00)  | 29 (0.31)  | 0.83 |

|       |     |                     |                   |          |          |                          |            |            |      |
|-------|-----|---------------------|-------------------|----------|----------|--------------------------|------------|------------|------|
| 11-01 | Gp3 | g.chr8:73849231C>A  | Silent            | KCNB2    | p.I547I  | potassium voltage-gated  | 80 (0.00)  | 50 (0.12)  | 0.40 |
| 11-01 | Gp3 | g.chr8:73849540G>A  | Silent            | KCNB2    | p.P650P  | potassium voltage-gated  | 42 (0.00)  | 33 (0.15)  | 0.50 |
| 11-01 | Gp3 | g.chr8:73849570T>A  | Silent            | KCNB2    | p.P660P  | potassium voltage-gated  | 61 (0.02)  | 29 (0.28)  | 0.92 |
| 11-01 | Gp3 | g.chr17:40315246C>A | Splice Site       | KCNH4    | p.G862W  | potassium voltage-gated  | 27 (0.00)  | 18 (0.28)  | 0.74 |
| 11-01 | Gp3 | g.chr17:40327651G>T | Silent            | KCNH4    | p.I311I  | potassium voltage-gated  | 30 (0.00)  | 17 (0.29)  | 0.78 |
| 11-01 | Gp3 | g.chr14:63174643C>T | Silent            | KCNH5    | p.E850E  | potassium voltage-gated  | 45 (0.00)  | 26 (0.27)  | 0.72 |
| 11-01 | Gp3 | g.chr2:163228368C>T | Missense Mutation | KCNH7    | p.V1188I | potassium voltage-gated  | 75 (0.00)  | 48 (0.15)  | 0.39 |
| 11-01 | Gp3 | g.chr2:163250985A>G | Missense Mutation | KCNH7    | p.L875P  | potassium voltage-gated  | 26 (0.00)  | 48 (0.19)  | 0.50 |
| 11-01 | Gp3 | g.chr6:18197404C>A  | Silent            | KDM1B    | p.I230I  | lysine (K)-specific demε | 42 (0.00)  | 24 (0.33)  | 0.89 |
| 11-01 | Gp3 | g.chr5:137727178A>G | Silent            | KDM3B    | p.E619E  | lysine (K)-specific demε | 99 (0.00)  | 24 (0.21)  | 0.56 |
| 11-01 | Gp3 | g.chr5:137762882G>T | Nonsense Mutation | KDM3B    | p.E1503* | lysine (K)-specific demε | 74 (0.00)  | 74 (0.30)  | 0.79 |
| 11-01 | Gp3 | g.chr11:94731574C>T | Silent            | KDM4D    | p.D346D  | lysine (K)-specific demε | 36 (0.00)  | 25 (0.20)  | 0.53 |
| 11-01 | Gp3 | g.chr1:202698199G>A | Missense Mutation | KDM5B    | p.R1534C | lysine (K)-specific demε | 50 (0.02)  | 45 (0.33)  | 0.89 |
| 11-01 | Gp3 | g.chr1:202731917G>A | Silent            | KDM5B    | p.S276S  | lysine (K)-specific demε | 123 (0.00) | 104 (0.18) | 0.49 |
| 11-01 | Gp3 | g.chr17:7754457G>T  | Missense Mutation | KDM6B    | p.Q1264H | lysine (K)-specific demε | 33 (0.00)  | 21 (0.24)  | 0.63 |
| 11-01 | Gp3 | g.chr18:61011667G>T | Silent            | KDSR     | p.G223G  | 3-ketodihydrosphingosii  | 104 (0.00) | 112 (0.21) | 0.57 |
| 11-01 | Gp3 | g.chr19:6420461G>A  | Silent            | KHSRP    | p.Y149Y  | KH-type splicing regula  | 24 (0.00)  | 25 (0.28)  | 0.75 |
| 11-01 | Gp3 | g.chr17:26948453C>T | Missense Mutation | KIAA0100 | p.G1675R | KIAA0100                 | 60 (0.00)  | 32 (0.25)  | 0.67 |
| 11-01 | Gp3 | g.chr17:26962288G>T | Missense Mutation | KIAA0100 | p.L773M  | KIAA0100                 | 89 (0.00)  | 48 (0.19)  | 0.50 |
| 11-01 | Gp3 | g.chr19:34818457T>A | Missense Mutation | KIAA0355 | p.S279R  | KIAA0355                 | 34 (0.00)  | 32 (0.34)  | 0.92 |
| 11-01 | Gp3 | g.chr17:6493272G>A  | Silent            | KIAA0753 | p.A871A  | KIAA0753                 | 27 (0.00)  | 12 (0.67)  | 1.78 |
| 11-01 | Gp3 | g.chr17:6511743G>A  | Missense Mutation | KIAA0753 | p.T585I  | KIAA0753                 | 97 (0.00)  | 63 (0.19)  | 0.51 |
| 11-01 | Gp3 | g.chr5:5461121G>A   | Silent            | KIAA0947 | p.S558S  |                          | 60 (0.00)  | 70 (0.37)  | 0.99 |
| 11-01 | Gp3 | g.chr1:92642888C>T  | Missense Mutation | KIAA1107 | p.T275I  | KIAA1107                 | 83 (0.00)  | 40 (0.20)  | 0.53 |
| 11-01 | Gp3 | g.chr1:92646248C>A  | Missense Mutation | KIAA1107 | p.A565E  | KIAA1107                 | 34 (0.00)  | 34 (0.32)  | 0.86 |
| 11-01 | Gp3 | g.chr4:123170680G>A | Silent            | KIAA1109 | p.K1851K | KIAA1109                 | 66 (0.00)  | 55 (0.18)  | 0.48 |
| 11-01 | Gp3 | g.chr7:141366198G>A | Nonsense Mutation | KIAA1147 | p.Q237*  | KIAA1147                 | 26 (0.00)  | 36 (0.17)  | 0.44 |
| 11-01 | Gp3 | g.chrX:118215397G>A | Silent            | KIAA1210 | p.L1675L | KIAA1210                 | 86 (0.00)  | 52 (0.29)  | 0.48 |
| 11-01 | Gp3 | g.chr4:37432311G>T  | Nonsense Mutation | KIAA1239 | p.E159*  |                          | 43 (0.00)  | 32 (0.19)  | 0.50 |
| 11-01 | Gp3 | g.chr3:128690239C>A | Missense Mutation | KIAA1257 | p.Q241H  | KIAA1257                 | 126 (0.00) | 99 (0.15)  | 0.40 |
| 11-01 | Gp3 | g.chr3:113737644C>A | Silent            | KIAA1407 | p.G348G  | KIAA1407                 | 45 (0.00)  | 33 (0.15)  | 0.40 |
| 11-01 | Gp3 | g.chr3:113761588G>T | Missense Mutation | KIAA1407 | p.P126Q  | KIAA1407                 | 48 (0.00)  | 15 (0.67)  | 1.78 |
| 11-01 | Gp3 | g.chr9:5769254C>A   | Missense Mutation | KIAA1432 | p.T1141N |                          | 98 (0.00)  | 40 (0.35)  | 0.55 |
| 11-01 | Gp3 | g.chr7:138583765G>A | Silent            | KIAA1549 | p.N1261N | KIAA1549                 | 90 (0.00)  | 93 (0.17)  | 0.46 |
| 11-01 | Gp3 | g.chr7:138603909C>T | Missense Mutation | KIAA1549 | p.D155N  | KIAA1549                 | 99 (0.00)  | 72 (0.19)  | 0.52 |

|       |     |                     |                   |           |          |                            |            |            |      |
|-------|-----|---------------------|-------------------|-----------|----------|----------------------------|------------|------------|------|
| 11-01 | Gp3 | g.chr11:33565594G>A | Missense Mutation | KIAA1549L | p.V532M  | KIAA1549-like              | 204 (0.00) | 149 (0.15) | 0.39 |
| 11-01 | Gp3 | g.chr11:33589661A>T | Missense Mutation | KIAA1549L | p.N1076I | KIAA1549-like              | 23 (0.00)  | 9 (0.67)   | 1.78 |
| 11-01 | Gp3 | g.chr12:32135977C>A | Silent            | KIAA1551  | p.L696L  | KIAA1551                   | 42 (0.00)  | 42 (0.14)  | 0.38 |
| 11-01 | Gp3 | g.chr12:32145377C>T | Missense Mutation | KIAA1551  | p.P1718S | KIAA1551                   | 73 (0.00)  | 71 (0.15)  | 0.41 |
| 11-01 | Gp3 | g.chr6:111587126C>T | Missense Mutation | KIAA1919  | p.H121Y  | KIAA1919                   | 43 (0.00)  | 30 (0.33)  | 0.52 |
| 11-01 | Gp3 | g.chrX:73960813C>T  | Silent            | KIAA2022  | p.Q1193Q | KIAA2022                   | 29 (0.00)  | 18 (0.39)  | 0.65 |
| 11-01 | Gp3 | g.chr1:200586947G>C | Nonsense Mutation | KIF14     | p.S302*  | kinesin family member      | 102 (0.00) | 54 (0.15)  | 0.40 |
| 11-01 | Gp3 | g.chr20:16409611C>T | Silent            | KIF16B    | p.T487T  | kinesin family member      | 63 (0.00)  | 31 (0.26)  | 0.69 |
| 11-01 | Gp3 | g.chr1:21031139C>A  | Missense Mutation | KIF17     | p.M308I  | kinesin family member      | 23 (0.00)  | 47 (0.15)  | 0.40 |
| 11-01 | Gp3 | g.chr17:43004387G>A | Missense Mutation | KIF18B    | p.T779I  | kinesin family member      | 23 (0.00)  | 11 (0.55)  | 1.45 |
| 11-01 | Gp3 | g.chr1:10356996A>T  | Missense Mutation | KIF1B     | p.N635Y  | kinesin family member      | 43 (0.00)  | 22 (0.23)  | 0.61 |
| 11-01 | Gp3 | g.chr12:39688279C>T | Missense Mutation | KIF21A    | p.D1658N | kinesin family member      | 83 (0.00)  | 78 (0.22)  | 0.58 |
| 11-01 | Gp3 | g.chr1:200965348C>A | Missense Mutation | KIF21B    | p.E751D  | kinesin family member      | 96 (0.00)  | 44 (0.18)  | 0.48 |
| 11-01 | Gp3 | g.chr1:200969562G>T | Missense Mutation | KIF21B    | p.D547E  | kinesin family member      | 36 (0.00)  | 20 (0.25)  | 0.67 |
| 11-01 | Gp3 | g.chr16:29814107G>T | Missense Mutation | KIF22     | p.S365I  | kinesin family member      | 57 (0.00)  | 40 (0.17)  | 0.47 |
| 11-01 | Gp3 | g.chr9:34257363C>T  | Missense Mutation | KIF24     | p.E748K  | kinesin family member      | 142 (0.01) | 50 (0.16)  | 0.43 |
| 11-01 | Gp3 | g.chr1:245809504C>G | Nonsense Mutation | KIF26B    | p.S727*  | kinesin family member      | 42 (0.00)  | 26 (0.65)  | 1.74 |
| 11-01 | Gp3 | g.chr1:45216132C>A  | Missense Mutation | KIF2C     | p.T112N  | kinesin family member      | 150 (0.00) | 72 (0.15)  | 0.41 |
| 11-01 | Gp3 | g.chr1:45220448G>C  | Missense Mutation | KIF2C     | p.W230C  | kinesin family member      | 147 (0.00) | 99 (0.14)  | 0.38 |
| 11-01 | Gp3 | g.chr1:45226316G>T  | Missense Mutation | KIF2C     | p.S542I  | kinesin family member      | 33 (0.00)  | 30 (0.17)  | 0.44 |
| 11-01 | Gp3 | g.chr5:132046737G>T | Nonsense Mutation | KIF3A     | p.S381*  | kinesin family member      | 75 (0.00)  | 38 (0.18)  | 0.49 |
| 11-01 | Gp3 | g.chr5:132062179C>T | Missense Mutation | KIF3A     | p.A98T   | kinesin family member      | 94 (0.00)  | 73 (0.44)  | 1.17 |
| 11-01 | Gp3 | g.chr5:154395472G>T | Nonsense Mutation | KIF4B     | p.E685*  | kinesin family member      | 184 (0.00) | 88 (0.16)  | 0.42 |
| 11-01 | Gp3 | g.chr12:57958721G>A | Missense Mutation | KIF5A     | p.V156M  | kinesin family member      | 32 (0.00)  | 22 (0.41)  | 1.09 |
| 11-01 | Gp3 | g.chr12:57963357G>C | Missense Mutation | KIF5A     | p.E336D  | kinesin family member      | 77 (0.00)  | 108 (0.18) | 0.47 |
| 11-01 | Gp3 | g.chr12:57972035G>T | Missense Mutation | KIF5A     | p.E816D  | kinesin family member      | 62 (0.00)  | 40 (0.20)  | 0.53 |
| 11-01 | Gp3 | g.chr6:39512344T>G  | Missense Mutation | KIF6      | p.R471S  | kinesin family member      | 57 (0.00)  | 22 (0.23)  | 0.61 |
| 11-01 | Gp3 | g.chr19:55284899G>A | Missense Mutation | KIR2DL1   | p.R62K   | killer cell immunoglobulin | 15 (0.00)  | 13 (0.62)  | 1.64 |
| 11-01 | Gp3 | g.chr19:55340886C>T | Silent            | KIR3DL1   | p.F357F  | killer cell immunoglobulin | 85 (0.01)  | 46 (0.26)  | 0.70 |
| 11-01 | Gp3 | g.chr1:158058186G>A | Missense Mutation | KIRREL    | p.C127Y  | kin of IRRE like (Droso)   | 46 (0.00)  | 61 (0.46)  | 1.22 |
| 11-01 | Gp3 | g.chr19:36350494C>T | Missense Mutation | KIRREL2   | p.P212S  | kin of IRRE like 2 (Dros)  | 45 (0.00)  | 24 (0.21)  | 0.56 |
| 11-01 | Gp3 | g.chr2:10188283C>A  | Silent            | KLF11     | p.T273T  | Kruppel-like factor 11     | 43 (0.00)  | 26 (0.19)  | 0.51 |
| 11-01 | Gp3 | g.chr4:38691488C>T  | Missense Mutation | KLF3      | p.A228V  | Kruppel-like factor 3 (b)  | 116 (0.00) | 27 (0.19)  | 0.49 |
| 11-01 | Gp3 | g.chr10:3826273C>A  | Intron            | KLF6      |          | Kruppel-like factor 6      | 20 (0.00)  | 22 (0.50)  | 1.33 |
| 11-01 | Gp3 | g.chr16:87782400G>A | Nonsense Mutation | KLHDC4    | p.Q129*  | kelch domain containing    | 99 (0.00)  | 23 (0.26)  | 0.70 |

|       |     |                     |                   |         |          |                                          |            |           |      |
|-------|-----|---------------------|-------------------|---------|----------|------------------------------------------|------------|-----------|------|
| 11-01 | Gp3 | g.chr1:205308854G>T | Missense Mutation | KLHDC8A | p.D153E  | kelch domain containing 17               | 17 (0.00)  | 18 (0.33) | 0.89 |
| 11-01 | Gp3 | g.chr3:49211718C>G  | Silent            | KLHDC8B | p.P141P  | kelch domain containing 23               | 23 (0.00)  | 15 (0.47) | 1.24 |
| 11-01 | Gp3 | g.chr18:30257157C>G | Silent            | KLHL14  | p.V575V  | kelch-like family member 67              | 67 (0.01)  | 38 (0.21) | 0.56 |
| 11-01 | Gp3 | g.chr4:166232672C>T | Missense Mutation | KLHL2   | p.P436S  | kelch-like family member 86              | 86 (0.00)  | 45 (0.16) | 0.41 |
| 11-01 | Gp3 | g.chr2:170591945G>A | Missense Mutation | KLHL23  | p.G141R  | kelch-like family member 23              | 23 (0.00)  | 28 (0.29) | 0.76 |
| 11-01 | Gp3 | g.chr2:170592626G>A | Missense Mutation | KLHL23  | p.G368S  | kelch-like family member 90              | 90 (0.00)  | 48 (0.15) | 0.39 |
| 11-01 | Gp3 | g.chr4:39083752G>C  | Missense Mutation | KLHL5   | p.L276F  | kelch-like family member 54              | 54 (0.00)  | 33 (0.18) | 0.48 |
| 11-01 | Gp3 | g.chr3:183217491C>T | Missense Mutation | KLHL6   | p.R345H  | kelch-like family member 47              | 47 (0.00)  | 26 (0.19) | 0.51 |
| 11-01 | Gp3 | g.chr3:183226234G>A | Silent            | KLHL6   | p.C174C  | kelch-like family member 60              | 60 (0.00)  | 34 (0.24) | 0.63 |
| 11-01 | Gp3 | g.chr19:51559900C>T | Missense Mutation | KLK13   | p.E260K  | kallikrein-related peptidase 54          | 54 (0.00)  | 55 (0.24) | 0.63 |
| 11-01 | Gp3 | g.chr19:51559937G>A | Silent            | KLK13   | p.V247V  | kallikrein-related peptidase 50          | 50 (0.00)  | 42 (0.17) | 0.44 |
| 11-01 | Gp3 | g.chr7:151845353G>A | Silent            | KMT2C   | p.L4553L | lysine (K)-specific methyltransferase 34 | 34 (0.00)  | 50 (0.20) | 0.53 |
| 11-01 | Gp3 | g.chr7:151856094C>T | Missense Mutation | KMT2C   | p.G3842R | lysine (K)-specific methyltransferase 37 | 37 (0.00)  | 30 (0.17) | 0.44 |
| 11-01 | Gp3 | g.chr7:151884347C>T | Splice Site       | KMT2C   | p.D1670N | lysine (K)-specific methyltransferase 33 | 33 (0.00)  | 34 (0.21) | 0.55 |
| 11-01 | Gp3 | g.chr12:49434175G>A | Missense Mutation | KMT2D   | p.R2460C | lysine (K)-specific methyltransferase 23 | 23 (0.00)  | 31 (0.29) | 0.77 |
| 11-01 | Gp3 | g.chr3:186459877G>A | Silent            | KNG1    | p.Q564Q  | kininogen 1                              | 80 (0.00)  | 61 (0.18) | 0.48 |
| 11-01 | Gp3 | g.chr17:66038449G>T | Missense Mutation | KPNA2   | p.W184L  | karyopherin alpha 2 (Ran)                | 111 (0.01) | 74 (0.22) | 0.58 |
| 11-01 | Gp3 | g.chr1:32635597G>A  | Silent            | KPNA6   | p.E453E  | karyopherin alpha 6 (importin alpha 6)   | 54 (0.00)  | 45 (0.18) | 0.47 |
| 11-01 | Gp3 | g.chr17:45738531G>A | Missense Mutation | KPNB1   | p.C83Y   | karyopherin (importin) beta 27           | 27 (0.00)  | 29 (0.21) | 0.55 |
| 11-01 | Gp3 | g.chr12:25380198G>T | Missense Mutation | KRAS    | p.T87N   | Kirsten rat sarcoma virus 24             | 24 (0.00)  | 31 (0.55) | 1.46 |
| 11-01 | Gp3 | g.chr12:25398232C>A | Silent            | KRAS    | p.V29V   | Kirsten rat sarcoma virus 36             | 36 (0.03)  | 37 (0.24) | 0.65 |
| 11-01 | Gp3 | g.chr17:8272813C>A  | Missense Mutation | KRBA2   | p.S291I  | KRAB-A domain containing 44              | 44 (0.00)  | 26 (0.38) | 1.03 |
| 11-01 | Gp3 | g.chr17:38976883C>T | Silent            | KRT10   | p.E249E  | keratin 10                               | 64 (0.00)  | 60 (0.15) | 0.40 |
| 11-01 | Gp3 | g.chr17:39741296G>A | Missense Mutation | KRT14   | p.T180I  | keratin 14                               | 51 (0.00)  | 27 (0.26) | 0.69 |
| 11-01 | Gp3 | g.chr12:95228286G>A | RNA               | KRT19P2 |          | keratin 19 pseudogene 277                | 277 (0.00) | 42 (0.14) | 0.49 |
| 11-01 | Gp3 | g.chr17:38956024G>T | Missense Mutation | KRT28   | p.A41D   | keratin 28                               | 19 (0.00)  | 11 (0.82) | 2.18 |
| 11-01 | Gp3 | g.chr12:53187908C>T | Missense Mutation | KRT3    | p.D285N  | keratin 3                                | 20 (0.00)  | 27 (0.37) | 0.99 |
| 11-01 | Gp3 | g.chr12:52632550C>T | Silent            | KRT7    | p.L228L  | keratin 7                                | 43 (0.00)  | 28 (0.18) | 0.48 |
| 11-01 | Gp3 | g.chr12:52635334G>T | Missense Mutation | KRT7    | p.D258Y  | keratin 7                                | 53 (0.00)  | 35 (0.14) | 0.38 |
| 11-01 | Gp3 | g.chr12:52946598G>A | Silent            | KRT71   | p.A88A   | keratin 71                               | 26 (0.00)  | 34 (0.18) | 0.47 |
| 11-01 | Gp3 | g.chr12:52946670C>T | Silent            | KRT71   | p.G64G   | keratin 71                               | 28 (0.00)  | 38 (0.18) | 0.49 |
| 11-01 | Gp3 | g.chr12:52967153G>A | Missense Mutation | KRT74   | p.R137C  | keratin 74                               | 17 (0.00)  | 25 (0.36) | 0.96 |
| 11-01 | Gp3 | g.chr12:53169381C>T | Silent            | KRT76   | p.R202R  | keratin 76                               | 31 (0.00)  | 17 (0.35) | 0.94 |
| 11-01 | Gp3 | g.chr12:52574300C>T | Silent            | KRT80   | p.E221E  | keratin 80                               | 42 (0.00)  | 13 (0.38) | 1.03 |
| 11-01 | Gp3 | g.chr12:52799673C>T | Missense Mutation | KRT82   | p.R130H  | keratin 82                               | 66 (0.02)  | 44 (0.30) | 0.79 |



|       |     |                      |                   |           |          |                           |            |           |      |
|-------|-----|----------------------|-------------------|-----------|----------|---------------------------|------------|-----------|------|
| 11-01 | Gp3 | g.chr21:46011416C>T  | Missense Mutation | KRTAP10-6 | p.C317Y  | keratin associated protei | 22 (0.00)  | 38 (0.16) | 0.42 |
| 11-01 | Gp3 | g.chr21:31933428C>G  | Missense Mutation | KRTAP19-7 | p.G61R   | keratin associated protei | 94 (0.00)  | 52 (0.17) | 0.46 |
| 11-01 | Gp3 | g.chr21:31709889C>A  | Missense Mutation | KRTAP27-1 | p.R33I   | keratin associated protei | 82 (0.00)  | 74 (0.32) | 0.86 |
| 11-01 | Gp3 | g.chr17:25934955G>T  | Silent            | KSR1      | p.R555R  | kinase suppressor of ras  | 40 (0.00)  | 29 (0.17) | 0.46 |
| 11-01 | Gp3 | g.chr12:117968754C>A | Silent            | KSR2      | p.S598S  | kinase suppressor of ras  | 57 (0.00)  | 19 (0.37) | 0.98 |
| 11-01 | Gp3 | g.chr3:134322856C>A  | Silent            | KY        | p.R517R  | kyphoscoliosis peptidas   | 52 (0.00)  | 25 (0.36) | 0.96 |
| 11-01 | Gp3 | g.chr6:130392196G>A  | Missense Mutation | L3MBTL3   | p.V390I  | l(3)mbt-like 3 (Drosoph   | 95 (0.00)  | 84 (0.15) | 0.41 |
| 11-01 | Gp3 | g.chr13:44464290C>T  | Nonsense Mutation | LACC1     | p.Q392*  | laccase (multicopper oxi  | 56 (0.00)  | 29 (0.24) | 0.64 |
| 11-01 | Gp3 | g.chr18:6973091G>C   | Missense Mutation | LAMA1     | p.L2247V | laminin, alpha 1          | 88 (0.00)  | 47 (0.15) | 0.40 |
| 11-01 | Gp3 | g.chr18:6978322G>A   | Silent            | LAMA1     | p.S2021S | laminin, alpha 1          | 50 (0.00)  | 26 (0.27) | 0.72 |
| 11-01 | Gp3 | g.chr18:7037710C>A   | Missense Mutation | LAMA1     | p.S535I  | laminin, alpha 1          | 44 (0.00)  | 15 (0.40) | 1.07 |
| 11-01 | Gp3 | g.chr18:7080338G>A   | Silent            | LAMA1     | p.P60P   | laminin, alpha 1          | 89 (0.00)  | 57 (0.16) | 0.42 |
| 11-01 | Gp3 | g.chr6:129813598C>T  | Silent            | LAMA2     | p.A2738A | laminin, alpha 2          | 147 (0.00) | 55 (0.22) | 0.58 |
| 11-01 | Gp3 | g.chr18:21484044C>A  | Missense Mutation | LAMA3     | p.L2156M | laminin, alpha 3          | 70 (0.01)  | 41 (0.29) | 0.78 |
| 11-01 | Gp3 | g.chr7:107577700C>T  | Missense Mutation | LAMB1     | p.E1262K | laminin, beta 1           | 63 (0.02)  | 25 (0.60) | 1.60 |
| 11-01 | Gp3 | g.chr7:107580528C>A  | Missense Mutation | LAMB1     | p.V1223L | laminin, beta 1           | 50 (0.00)  | 12 (0.58) | 1.56 |
| 11-01 | Gp3 | g.chr7:107594199C>T  | Splice Site       | LAMB1     | p.G952D  | laminin, beta 1           | 67 (0.00)  | 42 (0.21) | 0.57 |
| 11-01 | Gp3 | g.chr3:49167389C>A   | Missense Mutation | LAMB2     | p.A430S  | laminin, beta 2 (laminin  | 57 (0.00)  | 20 (0.35) | 0.93 |
| 11-01 | Gp3 | g.chr1:209805930G>A  | Nonsense Mutation | LAMB3     | p.Q274*  | laminin, beta 3           | 47 (0.00)  | 30 (0.17) | 0.44 |
| 11-01 | Gp3 | g.chr1:209811935C>G  | Missense Mutation | LAMB3     | p.R81P   | laminin, beta 3           | 27 (0.00)  | 44 (0.20) | 0.55 |
| 11-01 | Gp3 | g.chr9:133963151G>A  | Missense Mutation | LAMC3     | p.R1475H | laminin, gamma 3          | 34 (0.00)  | 40 (0.40) | 1.07 |
| 11-01 | Gp3 | g.chrX:119581775C>A  | Missense Mutation | LAMP2     | p.G221V  | lysosomal-associated m    | 21 (0.00)  | 18 (0.44) | 0.74 |
| 11-01 | Gp3 | g.chr22:33780227G>T  | Missense Mutation | LARGE     | p.T319N  | like-glycosyltransferase  | 51 (0.00)  | 49 (0.24) | 0.65 |
| 11-01 | Gp3 | g.chr5:145524042G>T  | Missense Mutation | LARS      | p.L550M  | leucyl-tRNA synthetase    | 37 (0.00)  | 32 (0.31) | 0.83 |
| 11-01 | Gp3 | g.chr3:45533051C>A   | Missense Mutation | LARS2     | p.Q428K  | leucyl-tRNA synthetase    | 52 (0.00)  | 46 (0.33) | 0.87 |
| 11-01 | Gp3 | g.chr6:150004617G>A  | Silent            | LATS1     | p.T536T  | large tumor suppressor    | 185 (0.00) | 46 (0.15) | 0.41 |
| 11-01 | Gp3 | g.chr11:111428306T>C | Silent            | LAYN      | p.I241I  | layilin                   | 270 (0.00) | 91 (0.15) | 0.41 |
| 11-01 | Gp3 | g.chr2:30546402G>T   | Nonstop Mutation  | LBH       | p.*49Y   | limb bud and heart deve   | 151 (0.00) | 53 (0.15) | 0.40 |
| 11-01 | Gp3 | g.chr6:80197235A>C   | Missense Mutation | LCA5      | p.I527S  | Leber congenital amauro   | 68 (0.00)  | 16 (0.31) | 0.83 |
| 11-01 | Gp3 | g.chr21:40778134C>T  | Missense Mutation | LCA5L     | p.E563K  | Leber congenital amauro   | 39 (0.00)  | 12 (0.58) | 0.66 |
| 11-01 | Gp3 | g.chr4:17847472C>A   | Missense Mutation | LCORL     | p.A277S  | ligand dependent nuclea   | 79 (0.00)  | 45 (0.33) | 0.89 |
| 11-01 | Gp3 | g.chr11:18425354G>C  | Missense Mutation | LDHA      | p.E236Q  | lactate dehydrogenase A   | 33 (0.00)  | 26 (0.35) | 0.92 |
| 11-01 | Gp3 | g.chr12:21796927A>T  | Silent            | LDHB      | p.I121I  | lactate dehydrogenase B   | 36 (0.00)  | 29 (0.31) | 0.83 |
| 11-01 | Gp3 | g.chr12:21797026G>T  | Silent            | LDHB      | p.A88A   | lactate dehydrogenase B   | 25 (0.00)  | 34 (0.15) | 0.39 |
| 11-01 | Gp3 | g.chr19:11230832C>A  | Missense Mutation | LDLR      | p.S637Y  | low density lipoprotein   | 127 (0.00) | 18 (0.33) | 0.89 |

|       |     |                     |                   |                 |         |                             |                |            |      |
|-------|-----|---------------------|-------------------|-----------------|---------|-----------------------------|----------------|------------|------|
| 11-01 | Gp3 | g.chr19:11240277C>T | Silent            | LDLR            | p.P826P | low density lipoprotein     | 164 (0.00)     | 33 (0.15)  | 0.40 |
| 11-01 | Gp3 | g.chr11:63283134G>T | Missense Mutation | LGALS12         | p.Q272H | lectin, galactoside-binding | 19 (0.00)      | 12 (0.50)  | 1.33 |
| 11-01 | Gp3 | g.chr19:35616200G>A | Missense Mutation | LGI4            | p.A504V | leucine-rich repeat         | LGI 16 (0.00)  | 32 (0.19)  | 0.50 |
| 11-01 | Gp3 | g.chr12:71977707C>A | Silent            | LGR5            | p.V639V | leucine-rich repeat         | cont 57 (0.00) | 24 (0.62)  | 1.67 |
| 11-01 | Gp3 | g.chr2:48936161C>A  | Splice Site       | LHCGR           | p.L202L | luteinizing hormone/chc     | 71 (0.00)      | 27 (0.22)  | 0.59 |
| 11-01 | Gp3 | g.chr17:33310124C>A | Missense Mutation | LIG3            | p.Q34K  | ligase III, DNA, ATP-de     | 42 (0.00)      | 25 (0.20)  | 0.53 |
| 11-01 | Gp3 | g.chr19:55106171G>A | Missense Mutation | LILRA1          | p.V38M  | leukocyte immunoglobu       | 64 (0.00)      | 39 (0.18)  | 0.48 |
| 11-01 | Gp3 | g.chr19:54845216G>A | Missense Mutation | LILRA4          | p.P426S | leukocyte immunoglobu       | 50 (0.02)      | 42 (0.14)  | 0.38 |
| 11-01 | Gp3 | g.chr19:54783780C>T | Missense Mutation | LILRB2          | p.R74Q  | leukocyte immunoglobu       | 77 (0.00)      | 64 (0.28)  | 0.75 |
| 11-01 | Gp3 | g.chr12:50571267C>A | Missense Mutation | LIMA1           | p.E621D | LIM domain and actin b      | 50 (0.00)      | 24 (0.25)  | 0.67 |
| 11-01 | Gp3 | g.chr12:50616135C>A | Missense Mutation | LIMA1           | p.R100I | LIM domain and actin b      | 19 (0.05)      | 14 (0.36)  | 0.95 |
| 11-01 | Gp3 | g.chr4:41526432G>A  | Silent            | LIMCH1          | p.L58L  | LIM and calponin homo       | 35 (0.00)      | 56 (0.16)  | 0.43 |
| 11-01 | Gp3 | g.chr4:41648780T>A  | Missense Mutation | LIMCH1          | p.V353D | LIM and calponin homo       | 72 (0.00)      | 35 (0.23)  | 0.61 |
| 11-01 | Gp3 | g.chr7:73530281G>A  | Missense Mutation | LIMK1           | p.M550I | LIM domain kinase 1         | 37 (0.00)      | 31 (0.19)  | 0.52 |
| 11-01 | Gp3 | g.chr2:128396970C>G | Silent            | LIMS2           | p.V152V | LIM and senescent cell      | :93 (0.00)     | 115 (0.21) | 0.56 |
| 11-01 | Gp3 | g.chr18:1363061C>A  | lincRNA           | LINC00470       |         | long intergenic non-prot    | 47 (0.02)      | 22 (0.50)  | 1.33 |
| 11-01 | Gp3 | g.chr3:108897260A>T | lincRNA           | LINC00488       |         | long intergenic non-prot    | 16 (0.00)      | 10 (0.70)  | 1.87 |
| 11-01 | Gp3 | g.chr3:108897261C>T | lincRNA           | LINC00488       |         | long intergenic non-prot    | 16 (0.00)      | 10 (0.70)  | 1.87 |
| 11-01 | Gp3 | g.chr6:10430289G>A  | lincRNA           | LINC00518       |         | long intergenic non-prot    | 50 (0.00)      | 32 (0.16)  | 0.42 |
| 11-01 | Gp3 | g.chr6:10430302G>A  | lincRNA           | LINC00518       |         | long intergenic non-prot    | 49 (0.00)      | 29 (0.17)  | 0.46 |
| 11-01 | Gp3 | g.chr7:47805840T>A  | RNA               | LINC00525       |         | long intergenic non-prot    | 22 (0.00)      | 14 (0.36)  | 0.95 |
| 11-01 | Gp3 | g.chr13:21894838C>A | lincRNA           | LINC00539       |         | long intergenic non-prot    | 16 (0.00)      | 30 (0.20)  | 0.53 |
| 11-01 | Gp3 | g.chr21:35335554C>G | RNA               | LINC00649       |         | long intergenic non-prot    | 21 (0.00)      | 23 (0.22)  | 0.58 |
| 11-01 | Gp3 | g.chr3:106825105C>A | lincRNA           | LINC00882       |         | long intergenic non-prot    | 85 (0.00)      | 71 (0.21)  | 0.56 |
| 11-01 | Gp3 | g.chr3:106825649C>T | lincRNA           | LINC00882       |         | long intergenic non-prot    | 61 (0.00)      | 33 (0.30)  | 0.81 |
| 11-01 | Gp3 | g.chr3:195392946T>C | lincRNA           | LINC00969       |         | long intergenic non-prot    | 55 (0.02)      | 33 (0.18)  | 0.48 |
| 11-01 | Gp3 | g.chr15:77906638G>A | Silent            | LINGO1          | p.G537G | leucine rich repeat and     | I 39 (0.00)    | 46 (0.15)  | 0.41 |
| 11-01 | Gp3 | g.chr15:77907737G>T | Nonsense Mutation | LINGO1          | p.S171* | leucine rich repeat and     | I 57 (0.00)    | 90 (0.17)  | 0.44 |
| 11-01 | Gp3 | g.chr10:90484356G>T | Missense Mutation | LIPK            | p.G19V  | lipase, family member       | K 37 (0.00)    | 18 (0.39)  | 0.53 |
| 11-01 | Gp3 | g.chr10:90528622C>T | Silent            | LIPN            | p.I203I | lipase, family member       | N 69 (0.00)    | 22 (0.41)  | 0.56 |
| 11-01 | Gp3 | g.chr10:90537820G>A | Missense Mutation | LIPN            | p.A340T | lipase, family member       | N 68 (0.00)    | 38 (0.29)  | 0.40 |
| 11-01 | Gp3 | g.chr1:145498775C>T | Silent            | LIX1L           | p.C337C | Lix1 homolog (chicken)      | 83 (0.00)      | 72 (0.15)  | 0.41 |
| 11-01 | Gp3 | g.chr22:37361505T>C | RNA               | LL22NC01-81G9.3 |         |                             | 75 (0.01)      | 42 (0.29)  | 0.76 |
| 11-01 | Gp3 | g.chr15:75116803G>A | Missense Mutation | LMAN1L          | p.G479S | lectin, mannose-binding     | 90 (0.00)      | 69 (0.25)  | 0.66 |
| 11-01 | Gp3 | g.chr12:49494202G>T | Missense Mutation | LMBR1L          | p.S403R | limb development meml       | 193 (0.00)     | 140 (0.22) | 0.59 |

|       |     |                     |                   |          |          |                            |            |           |      |
|-------|-----|---------------------|-------------------|----------|----------|----------------------------|------------|-----------|------|
| 11-01 | Gp3 | g.chr16:1004514G>A  | Silent            | LMF1     | p.L116L  | lipase maturation factor   | 73 (0.00)  | 35 (0.14) | 0.38 |
| 11-01 | Gp3 | g.chr3:197748464G>A | Missense Mutation | LMLN     | p.E542K  | leishmanolysin-like (me    | 52 (0.00)  | 46 (0.15) | 0.41 |
| 11-01 | Gp3 | g.chr13:76393627G>A | Silent            | LMO7     | p.K488K  | LIM domain 7               | 29 (0.00)  | 20 (0.30) | 0.80 |
| 11-01 | Gp3 | g.chr18:44102127G>C | Missense Mutation | LOXHD1   | p.S563R  | lipoxygenase homology      | 21 (0.00)  | 18 (0.33) | 0.89 |
| 11-01 | Gp3 | g.chr18:44125286C>G | Missense Mutation | LOXHD1   | p.D94H   | lipoxygenase homology      | 23 (0.00)  | 14 (0.79) | 2.10 |
| 11-01 | Gp3 | g.chr15:74241853G>A | Silent            | LOXL1    | p.V552V  | lysyl oxidase-like 1       | 31 (0.00)  | 16 (0.38) | 1.00 |
| 11-01 | Gp3 | g.chr6:160905166G>C | RNA               | LPAL2    |          | lipoprotein, Lp(a)-like    | 247 (0.00) | 33 (0.42) | 1.13 |
| 11-01 | Gp3 | g.chr1:82436153G>C  | Missense Mutation | LPHN2    | p.L959F  | latrophilin 2              | 71 (0.00)  | 42 (0.19) | 0.51 |
| 11-01 | Gp3 | g.chr1:82456601G>A  | Silent            | LPHN2    | p.P1384P | latrophilin 2              | 49 (0.00)  | 24 (0.29) | 0.78 |
| 11-01 | Gp3 | g.chr18:2931284C>T  | Missense Mutation | LPIN2    | p.G476S  | lipin 2                    | 27 (0.00)  | 23 (0.22) | 0.58 |
| 11-01 | Gp3 | g.chr1:99772002C>G  | Missense Mutation | LPPR4    | p.I576M  |                            | 50 (0.00)  | 22 (0.23) | 0.61 |
| 11-01 | Gp3 | g.chr4:155665568G>A | Silent            | LRAT     | p.A30A   | lecithin retinol acyltrans | 23 (0.00)  | 24 (0.25) | 0.67 |
| 11-01 | Gp3 | g.chr4:151849757C>G | Missense Mutation | LRBA     | p.D154H  | LPS-responsive vesicle     | 32 (0.00)  | 22 (0.36) | 0.97 |
| 11-01 | Gp3 | g.chr7:133812142C>T | Missense Mutation | LRGUK    | p.L8F    | leucine-rich repeats and   | 63 (0.00)  | 37 (0.16) | 0.43 |
| 11-01 | Gp3 | g.chr10:85994071C>T | Missense Mutation | LRIT1    | p.G218D  | leucine-rich repeat, imm   | 19 (0.00)  | 14 (0.36) | 0.95 |
| 11-01 | Gp3 | g.chr8:105509727C>A | Missense Mutation | LRP12    | p.R351S  | low density lipoprotein    | 125 (0.00) | 29 (0.52) | 1.38 |
| 11-01 | Gp3 | g.chr2:141283899C>A | Nonsense Mutation | LRP1B    | p.E2595* | low density lipoprotein    | 153 (0.00) | 20 (0.25) | 0.67 |
| 11-01 | Gp3 | g.chr2:170101314C>A | Missense Mutation | LRP2     | p.A970S  | low density lipoprotein    | 123 (0.00) | 21 (0.48) | 1.27 |
| 11-01 | Gp3 | g.chr12:12315272C>A | Missense Mutation | LRP6     | p.V712L  | low density lipoprotein    | 191 (0.00) | 91 (0.27) | 0.73 |
| 11-01 | Gp3 | g.chr1:53727740C>T  | Splice Site       | LRP8     | p.E191E  | low density lipoprotein    | 123 (0.00) | 11 (0.45) | 1.21 |
| 11-01 | Gp3 | g.chr14:24532540G>A | Missense Mutation | LRRC16B  | p.S926N  | leucine rich repeat conta  | 20 (0.00)  | 27 (0.19) | 0.49 |
| 11-01 | Gp3 | g.chr17:62859116G>A | Missense Mutation | LRRC37A3 | p.A1025V | leucine rich repeat conta  | 88 (0.00)  | 44 (0.16) | 0.42 |
| 11-01 | Gp3 | g.chr17:62864646C>T | Missense Mutation | LRRC37A3 | p.G996E  | leucine rich repeat conta  | 69 (0.00)  | 33 (0.27) | 0.73 |
| 11-01 | Gp3 | g.chr7:127668792G>T | Silent            | LRRC4    | p.I634I  | leucine rich repeat conta  | 79 (0.00)  | 34 (0.21) | 0.55 |
| 11-01 | Gp3 | g.chr17:17900940C>G | Missense Mutation | LRRC48   | p.H331D  | leucine rich repeat conta  | 43 (0.00)  | 55 (0.18) | 0.48 |
| 11-01 | Gp3 | g.chr17:17919414G>T | Missense Mutation | LRRC48   | p.G455W  | leucine rich repeat conta  | 85 (0.00)  | 96 (0.16) | 0.42 |
| 11-01 | Gp3 | g.chr15:71302202C>T | Silent            | LRRC49   | p.A194A  | leucine rich repeat conta  | 82 (0.01)  | 34 (0.15) | 0.39 |
| 11-01 | Gp3 | g.chr15:42836299G>A | Silent            | LRRC57   | p.T234T  | leucine rich repeat conta  | 94 (0.00)  | 68 (0.22) | 0.59 |
| 11-01 | Gp3 | g.chr1:90399220C>A  | Nonsense Mutation | LRRC8D   | p.S198*  | leucine rich repeat conta  | 27 (0.00)  | 36 (0.17) | 0.44 |
| 11-01 | Gp3 | g.chr1:90399848T>C  | Silent            | LRRC8D   | p.S407S  | leucine rich repeat conta  | 50 (0.00)  | 27 (0.30) | 0.79 |
| 11-01 | Gp3 | g.chr8:86041607C>T  | Missense Mutation | LRRC1    | p.A540V  | leucine rich repeat and c  | 79 (0.00)  | 22 (0.32) | 1.06 |
| 11-01 | Gp3 | g.chr12:85450933C>T | Nonsense Mutation | LRRIQ1   | p.R788*  | leucine-rich repeats and   | 90 (0.00)  | 42 (0.33) | 0.89 |
| 11-01 | Gp3 | g.chr12:40728846G>T | Missense Mutation | LRRK2    | p.L1945F | leucine-rich repeat kinas  | 56 (0.00)  | 30 (0.23) | 0.62 |
| 11-01 | Gp3 | g.chr3:3887642C>T   | Silent            | LRRN1    | p.I439I  | leucine rich repeat neurc  | 56 (0.00)  | 55 (0.31) | 0.82 |
| 11-01 | Gp3 | g.chr3:194365345G>A | Missense Mutation | LSG1     | p.A585V  | large 60S subunit nucle    | 43 (0.00)  | 17 (0.41) | 1.10 |

|       |     |                      |                   |            |          |                                                            |            |            |      |
|-------|-----|----------------------|-------------------|------------|----------|------------------------------------------------------------|------------|------------|------|
| 11-01 | Gp3 | g.chr12:21175799C>A  | Missense Mutation | LST3       | p.S166Y  |                                                            | 143 (0.00) | 48 (0.15)  | 0.39 |
| 11-01 | Gp3 | g.chr12:96416006C>A  | Silent            | LTA4H      | p.V168V  | leukotriene A4 hydrolase                                   | 26 (0.00)  | 25 (0.48)  | 1.63 |
| 11-01 | Gp3 | g.chr2:33518241C>A   | Missense Mutation | LTBP1      | p.L664M  | latent transforming growth factor beta 1                   | 23 (0.00)  | 16 (0.44)  | 1.17 |
| 11-01 | Gp3 | g.chr6:144178561G>A  | Silent            | LTV1       | p.E173E  | LTV1 ribosome biogenesis factor 1                          | 34 (0.00)  | 14 (0.43)  | 1.14 |
| 11-01 | Gp3 | g.chr6:144184359G>T  | Missense Mutation | LTV1       | p.R418L  | LTV1 ribosome biogenesis factor 1                          | 106 (0.00) | 55 (0.15)  | 0.39 |
| 11-01 | Gp3 | g.chr12:91502700C>G  | Missense Mutation | LUM        | p.Q19H   | lumican                                                    | 19 (0.00)  | 17 (0.29)  | 0.78 |
| 11-01 | Gp3 | g.chr2:160667085G>T  | Missense Mutation | LY75-CD302 | p.Q1551K | LY75-CD302 readthrough                                     | 61 (0.00)  | 26 (0.19)  | 0.51 |
| 11-01 | Gp3 | g.chr2:160746763G>T  | Missense Mutation | LY75-CD302 | p.L255M  | LY75-CD302 readthrough                                     | 64 (0.00)  | 39 (0.18)  | 0.48 |
| 11-01 | Gp3 | g.chr2:160755242C>A  | Missense Mutation | LY75-CD302 | p.K141N  | LY75-CD302 readthrough                                     | 96 (0.00)  | 47 (0.15)  | 0.40 |
| 11-01 | Gp3 | g.chr2:99860539G>A   | Missense Mutation | LYG2       | p.A148V  | lysozyme G-like 2                                          | 82 (0.01)  | 58 (0.16)  | 0.41 |
| 11-01 | Gp3 | g.chr1:235866056G>A  | Silent            | LYST       | p.I3455I | lysosomal trafficking regulator                            | 38 (0.00)  | 23 (0.48)  | 0.91 |
| 11-01 | Gp3 | g.chr1:235950552G>T  | Missense Mutation | LYST       | p.Q1604K | lysosomal trafficking regulator                            | 93 (0.00)  | 60 (0.28)  | 0.54 |
| 11-01 | Gp3 | g.chr1:235973079C>A  | Nonsense Mutation | LYST       | p.E347*  | lysosomal trafficking regulator                            | 82 (0.00)  | 35 (0.23)  | 0.43 |
| 11-01 | Gp3 | g.chr1:9994861C>T    | Missense Mutation | LZIC       | p.A99T   | leucine zipper and CTN domain containing 123               | 123 (0.00) | 66 (0.27)  | 0.73 |
| 11-01 | Gp3 | g.chr10:102763365C>T | Silent            | LZTS2      | p.T170T  | leucine zipper, putative                                   | 40 (0.00)  | 40 (0.25)  | 0.67 |
| 11-01 | Gp3 | g.chr7:20199255C>A   | Silent            | MACC1      | p.V243V  | metastasis associated in colon cancer 1                    | 75 (0.00)  | 61 (0.25)  | 0.66 |
| 11-01 | Gp3 | g.chr1:39765893G>A   | Silent            | MACF1      | p.E836E  | microtubule-actin crosslinker 1                            | 27 (0.00)  | 32 (0.22)  | 0.58 |
| 11-01 | Gp3 | g.chr1:39788680G>A   | Splice Site       | MACF1      | p.E1417E | microtubule-actin crosslinker 1                            | 24 (0.00)  | 39 (0.31)  | 0.82 |
| 11-01 | Gp3 | g.chr1:39800239G>A   | Missense Mutation | MACF1      | p.S2665N | microtubule-actin crosslinker 1                            | 37 (0.00)  | 16 (0.62)  | 1.67 |
| 11-01 | Gp3 | g.chr1:39806281G>A   | Silent            | MACF1      | p.L3446L | microtubule-actin crosslinker 1                            | 40 (0.00)  | 29 (0.17)  | 0.46 |
| 11-01 | Gp3 | g.chr1:39893242G>A   | Missense Mutation | MACF1      | p.G5483S | microtubule-actin crosslinker 1                            | 98 (0.00)  | 55 (0.35)  | 0.92 |
| 11-01 | Gp3 | g.chr1:39906797G>A   | Splice Site       | MACF1      | p.E6089E | microtubule-actin crosslinker 1                            | 40 (0.00)  | 27 (0.19)  | 0.49 |
| 11-01 | Gp3 | g.chr1:39913818G>A   | Silent            | MACF1      | p.K6593K | microtubule-actin crosslinker 1                            | 41 (0.00)  | 32 (0.31)  | 0.83 |
| 11-01 | Gp3 | g.chr11:47312298G>C  | Missense Mutation | MADD       | p.A1098P | MAP-kinase activating phosphatase 3                        | 36 (0.00)  | 24 (0.33)  | 0.89 |
| 11-01 | Gp3 | g.chr11:47330905G>T  | Missense Mutation | MADD       | p.E1335D | MAP-kinase activating phosphatase 3                        | 25 (0.00)  | 10 (0.60)  | 1.60 |
| 11-01 | Gp3 | g.chr11:47350629C>A  | Silent            | MADD       | p.L1624L | MAP-kinase activating phosphatase 3                        | 74 (0.00)  | 52 (0.15)  | 0.41 |
| 11-01 | Gp3 | g.chr16:79632746C>A  | Missense Mutation | MAF        | p.V352L  | v-maf avian musculoaponeurosis                             | 17 (0.00)  | 30 (0.23)  | 0.62 |
| 11-01 | Gp3 | g.chrX:151935277G>C  | Missense Mutation | MAGEA3     | p.P297R  | melanoma antigen family 3                                  | 34 (0.00)  | 24 (0.33)  | 0.56 |
| 11-01 | Gp3 | g.chrX:140994279T>A  | Missense Mutation | MAGEC1     | p.S363R  | melanoma antigen family 70                                 | 70 (0.00)  | 30 (0.27)  | 0.44 |
| 11-01 | Gp3 | g.chr3:184428919G>T  | Missense Mutation | MAGEF1     | p.H231N  | melanoma antigen family 31                                 | 31 (0.00)  | 14 (0.43)  | 1.14 |
| 11-01 | Gp3 | g.chr3:65350542C>A   | Silent            | MAGI1      | p.G1025G | membrane associated guanine nucleotide exchange factor 17  | 17 (0.00)  | 15 (0.73)  | 1.96 |
| 11-01 | Gp3 | g.chr3:65479297C>A   | Missense Mutation | MAGI1      | p.R147L  | membrane associated guanine nucleotide exchange factor 22  | 22 (0.00)  | 15 (0.40)  | 1.07 |
| 11-01 | Gp3 | g.chr7:77667353C>A   | Intron            | MAGI2      |          | membrane associated guanine nucleotide exchange factor 86  | 86 (0.00)  | 98 (0.26)  | 0.68 |
| 11-01 | Gp3 | g.chr7:77667354C>A   | Intron            | MAGI2      |          | membrane associated guanine nucleotide exchange factor 86  | 86 (0.00)  | 95 (0.26)  | 0.70 |
| 11-01 | Gp3 | g.chr7:77674923G>C   | Intron            | MAGI2      |          | membrane associated guanine nucleotide exchange factor 101 | 101 (0.00) | 109 (0.22) | 0.59 |

|       |     |                    |                   |       |          |                     |               |            |      |
|-------|-----|--------------------|-------------------|-------|----------|---------------------|---------------|------------|------|
| 11-01 | Gp3 | g.chr7:77679026G>A | Intron            | MAGI2 |          | membrane associated | gu 62 (0.00)  | 33 (0.18)  | 0.48 |
| 11-01 | Gp3 | g.chr7:77680166G>C | Intron            | MAGI2 |          | membrane associated | gu 63 (0.00)  | 34 (0.21)  | 0.55 |
| 11-01 | Gp3 | g.chr7:77687132G>A | Intron            | MAGI2 |          | membrane associated | gu 76 (0.00)  | 72 (0.22)  | 0.59 |
| 11-01 | Gp3 | g.chr7:77696136G>A | Intron            | MAGI2 |          | membrane associated | gu 111 (0.01) | 105 (0.32) | 0.86 |
| 11-01 | Gp3 | g.chr7:77708353G>T | Missense Mutation | MAGI2 | p.T1206K | membrane associated | gu 32 (0.00)  | 26 (0.58)  | 1.54 |
| 11-01 | Gp3 | g.chr7:77713709C>A | Intron            | MAGI2 |          | membrane associated | gu 96 (0.00)  | 45 (0.16)  | 0.41 |
| 11-01 | Gp3 | g.chr7:77724893C>T | Intron            | MAGI2 |          | membrane associated | gu 45 (0.00)  | 28 (0.18)  | 0.48 |
| 11-01 | Gp3 | g.chr7:77753744G>T | Intron            | MAGI2 |          | membrane associated | gu 51 (0.00)  | 20 (0.35)  | 0.93 |
| 11-01 | Gp3 | g.chr7:77753989T>C | Intron            | MAGI2 |          | membrane associated | gu 55 (0.00)  | 22 (0.41)  | 1.09 |
| 11-01 | Gp3 | g.chr7:77762382G>A | Intron            | MAGI2 |          | membrane associated | gu 77 (0.00)  | 26 (0.23)  | 0.62 |
| 11-01 | Gp3 | g.chr7:77769784G>A | Intron            | MAGI2 |          | membrane associated | gu 21 (0.00)  | 17 (0.65)  | 1.73 |
| 11-01 | Gp3 | g.chr7:77777094C>T | Intron            | MAGI2 |          | membrane associated | gu 68 (0.00)  | 48 (0.23)  | 0.61 |
| 11-01 | Gp3 | g.chr7:77781013G>T | Intron            | MAGI2 |          | membrane associated | gu 74 (0.01)  | 48 (0.31)  | 0.83 |
| 11-01 | Gp3 | g.chr7:77781096C>A | Intron            | MAGI2 |          | membrane associated | gu 76 (0.00)  | 46 (0.15)  | 0.41 |
| 11-01 | Gp3 | g.chr7:77781102C>T | Intron            | MAGI2 |          | membrane associated | gu 75 (0.00)  | 46 (0.17)  | 0.46 |
| 11-01 | Gp3 | g.chr7:77797834C>G | Intron            | MAGI2 |          | membrane associated | gu 48 (0.00)  | 22 (0.55)  | 1.45 |
| 11-01 | Gp3 | g.chr7:77798485C>A | Intron            | MAGI2 |          | membrane associated | gu 37 (0.00)  | 25 (0.32)  | 0.85 |
| 11-01 | Gp3 | g.chr7:77803733G>A | Intron            | MAGI2 |          | membrane associated | gu 46 (0.00)  | 36 (0.17)  | 0.44 |
| 11-01 | Gp3 | g.chr7:77806660G>T | Intron            | MAGI2 |          | membrane associated | gu 41 (0.00)  | 33 (0.15)  | 0.40 |
| 11-01 | Gp3 | g.chr7:77808344C>A | Intron            | MAGI2 |          | membrane associated | gu 67 (0.00)  | 64 (0.17)  | 0.46 |
| 11-01 | Gp3 | g.chr7:77810868A>G | Intron            | MAGI2 |          | membrane associated | gu 51 (0.02)  | 35 (0.57)  | 1.52 |
| 11-01 | Gp3 | g.chr7:77816945G>A | Intron            | MAGI2 |          | membrane associated | gu 72 (0.00)  | 35 (0.29)  | 0.76 |
| 11-01 | Gp3 | g.chr7:77818554C>A | Intron            | MAGI2 |          | membrane associated | gu 61 (0.00)  | 24 (0.21)  | 0.56 |
| 11-01 | Gp3 | g.chr7:77839885C>A | Intron            | MAGI2 |          | membrane associated | gu 85 (0.00)  | 44 (0.43)  | 1.15 |
| 11-01 | Gp3 | g.chr7:77858873G>A | Intron            | MAGI2 |          | membrane associated | gu 33 (0.00)  | 22 (0.32)  | 0.85 |
| 11-01 | Gp3 | g.chr7:77885297G>C | Silent            | MAGI2 | p.P670P  | membrane associated | gu 20 (0.00)  | 27 (0.22)  | 0.59 |
| 11-01 | Gp3 | g.chr7:77896561C>T | Intron            | MAGI2 |          | membrane associated | gu 38 (0.00)  | 42 (0.48)  | 1.27 |
| 11-01 | Gp3 | g.chr7:77906183G>A | Intron            | MAGI2 |          | membrane associated | gu 17 (0.00)  | 19 (0.74)  | 1.96 |
| 11-01 | Gp3 | g.chr7:77907022C>T | Intron            | MAGI2 |          | membrane associated | gu 55 (0.02)  | 30 (0.27)  | 0.71 |
| 11-01 | Gp3 | g.chr7:77909135C>T | Intron            | MAGI2 |          | membrane associated | gu 62 (0.02)  | 63 (0.43)  | 1.14 |
| 11-01 | Gp3 | g.chr7:77916572C>T | Intron            | MAGI2 |          | membrane associated | gu 88 (0.00)  | 23 (0.35)  | 0.93 |
| 11-01 | Gp3 | g.chr7:77939110G>A | Intron            | MAGI2 |          | membrane associated | gu 85 (0.00)  | 27 (0.33)  | 0.89 |
| 11-01 | Gp3 | g.chr7:77980926C>T | Intron            | MAGI2 |          | membrane associated | gu 49 (0.00)  | 33 (0.15)  | 0.40 |
| 11-01 | Gp3 | g.chr7:78011569G>A | Intron            | MAGI2 |          | membrane associated | gu 29 (0.00)  | 20 (0.30)  | 0.80 |
| 11-01 | Gp3 | g.chr7:78014742G>A | Intron            | MAGI2 |          | membrane associated | gu 55 (0.00)  | 29 (0.59)  | 1.56 |

|       |     |                    |        |       |                        |            |            |      |
|-------|-----|--------------------|--------|-------|------------------------|------------|------------|------|
| 11-01 | Gp3 | g.chr7:78018102G>T | Intron | MAGI2 | membrane associated gu | 40 (0.00)  | 39 (0.23)  | 0.62 |
| 11-01 | Gp3 | g.chr7:78021807G>T | Intron | MAGI2 | membrane associated gu | 21 (0.00)  | 13 (0.38)  | 1.03 |
| 11-01 | Gp3 | g.chr7:78043988C>T | Intron | MAGI2 | membrane associated gu | 65 (0.00)  | 31 (0.19)  | 0.52 |
| 11-01 | Gp3 | g.chr7:78047085C>A | Intron | MAGI2 | membrane associated gu | 65 (0.00)  | 25 (0.20)  | 0.53 |
| 11-01 | Gp3 | g.chr7:78059319C>T | Intron | MAGI2 | membrane associated gu | 48 (0.00)  | 43 (0.19)  | 0.50 |
| 11-01 | Gp3 | g.chr7:78064406G>A | Intron | MAGI2 | membrane associated gu | 33 (0.00)  | 18 (0.50)  | 1.33 |
| 11-01 | Gp3 | g.chr7:78066884C>A | Intron | MAGI2 | membrane associated gu | 20 (0.00)  | 25 (0.68)  | 1.81 |
| 11-01 | Gp3 | g.chr7:78073820G>C | Intron | MAGI2 | membrane associated gu | 21 (0.00)  | 27 (0.33)  | 0.89 |
| 11-01 | Gp3 | g.chr7:78078430G>A | Intron | MAGI2 | membrane associated gu | 50 (0.00)  | 38 (0.18)  | 0.49 |
| 11-01 | Gp3 | g.chr7:78095224C>G | Intron | MAGI2 | membrane associated gu | 34 (0.00)  | 15 (0.33)  | 0.89 |
| 11-01 | Gp3 | g.chr7:78117050G>T | Intron | MAGI2 | membrane associated gu | 124 (0.00) | 90 (0.18)  | 0.47 |
| 11-01 | Gp3 | g.chr7:78122111C>A | Intron | MAGI2 | membrane associated gu | 50 (0.00)  | 37 (0.19)  | 0.50 |
| 11-01 | Gp3 | g.chr7:78127422C>G | Intron | MAGI2 | membrane associated gu | 38 (0.00)  | 24 (0.25)  | 0.67 |
| 11-01 | Gp3 | g.chr7:78134910C>A | Intron | MAGI2 | membrane associated gu | 22 (0.00)  | 21 (0.24)  | 0.63 |
| 11-01 | Gp3 | g.chr7:78141470G>C | Intron | MAGI2 | membrane associated gu | 38 (0.03)  | 21 (0.33)  | 0.89 |
| 11-01 | Gp3 | g.chr7:78143934C>A | Intron | MAGI2 | membrane associated gu | 71 (0.00)  | 100 (0.16) | 0.43 |
| 11-01 | Gp3 | g.chr7:78155504G>A | Intron | MAGI2 | membrane associated gu | 25 (0.00)  | 16 (0.56)  | 1.50 |
| 11-01 | Gp3 | g.chr7:78178956G>T | Intron | MAGI2 | membrane associated gu | 29 (0.00)  | 36 (0.17)  | 0.44 |
| 11-01 | Gp3 | g.chr7:78198248G>C | Intron | MAGI2 | membrane associated gu | 61 (0.00)  | 36 (0.17)  | 0.44 |
| 11-01 | Gp3 | g.chr7:78200714G>T | Intron | MAGI2 | membrane associated gu | 25 (0.00)  | 24 (0.29)  | 0.78 |
| 11-01 | Gp3 | g.chr7:78204209G>A | Intron | MAGI2 | membrane associated gu | 56 (0.02)  | 47 (0.23)  | 0.62 |
| 11-01 | Gp3 | g.chr7:78227790G>A | Intron | MAGI2 | membrane associated gu | 159 (0.00) | 91 (0.19)  | 0.50 |
| 11-01 | Gp3 | g.chr7:78237470G>A | Intron | MAGI2 | membrane associated gu | 70 (0.00)  | 59 (0.29)  | 0.77 |
| 11-01 | Gp3 | g.chr7:78243228C>T | Intron | MAGI2 | membrane associated gu | 22 (0.00)  | 16 (0.50)  | 1.33 |
| 11-01 | Gp3 | g.chr7:78260792C>T | Intron | MAGI2 | membrane associated gu | 32 (0.00)  | 25 (0.28)  | 0.75 |
| 11-01 | Gp3 | g.chr7:78261105C>T | Intron | MAGI2 | membrane associated gu | 68 (0.00)  | 48 (0.27)  | 0.72 |
| 11-01 | Gp3 | g.chr7:78263808G>T | Intron | MAGI2 | membrane associated gu | 110 (0.01) | 82 (0.17)  | 0.46 |
| 11-01 | Gp3 | g.chr7:78288429C>G | Intron | MAGI2 | membrane associated gu | 44 (0.00)  | 15 (0.33)  | 0.89 |
| 11-01 | Gp3 | g.chr7:78307697G>A | Intron | MAGI2 | membrane associated gu | 48 (0.00)  | 17 (0.29)  | 0.78 |
| 11-01 | Gp3 | g.chr7:78310016C>G | Intron | MAGI2 | membrane associated gu | 35 (0.00)  | 23 (0.22)  | 0.58 |
| 11-01 | Gp3 | g.chr7:78328786G>T | Intron | MAGI2 | membrane associated gu | 29 (0.00)  | 21 (0.24)  | 0.63 |
| 11-01 | Gp3 | g.chr7:78343930C>A | Intron | MAGI2 | membrane associated gu | 107 (0.01) | 69 (0.29)  | 0.77 |
| 11-01 | Gp3 | g.chr7:78345337G>T | Intron | MAGI2 | membrane associated gu | 75 (0.00)  | 50 (0.22)  | 0.59 |
| 11-01 | Gp3 | g.chr7:78353868G>A | Intron | MAGI2 | membrane associated gu | 116 (0.00) | 96 (0.27)  | 0.72 |
| 11-01 | Gp3 | g.chr7:78364012C>A | Intron | MAGI2 | membrane associated gu | 117 (0.00) | 63 (0.35)  | 0.93 |

|       |     |                    |        |       |                     |               |            |      |
|-------|-----|--------------------|--------|-------|---------------------|---------------|------------|------|
| 11-01 | Gp3 | g.chr7:78381258C>G | Intron | MAGI2 | membrane associated | gu 29 (0.00)  | 21 (0.43)  | 1.14 |
| 11-01 | Gp3 | g.chr7:78385646C>A | Intron | MAGI2 | membrane associated | gu 57 (0.00)  | 13 (0.54)  | 1.44 |
| 11-01 | Gp3 | g.chr7:78398758T>A | Intron | MAGI2 | membrane associated | gu 83 (0.00)  | 47 (0.17)  | 0.45 |
| 11-01 | Gp3 | g.chr7:78404136G>A | Intron | MAGI2 | membrane associated | gu 49 (0.00)  | 18 (0.39)  | 1.04 |
| 11-01 | Gp3 | g.chr7:78406920C>A | Intron | MAGI2 | membrane associated | gu 104 (0.01) | 80 (0.23)  | 0.60 |
| 11-01 | Gp3 | g.chr7:78411627T>A | Intron | MAGI2 | membrane associated | gu 38 (0.00)  | 13 (0.54)  | 1.44 |
| 11-01 | Gp3 | g.chr7:78418330G>A | Intron | MAGI2 | membrane associated | gu 80 (0.00)  | 51 (0.35)  | 0.94 |
| 11-01 | Gp3 | g.chr7:78427851G>T | Intron | MAGI2 | membrane associated | gu 41 (0.00)  | 25 (0.28)  | 0.75 |
| 11-01 | Gp3 | g.chr7:78446463T>A | Intron | MAGI2 | membrane associated | gu 42 (0.00)  | 39 (0.18)  | 0.48 |
| 11-01 | Gp3 | g.chr7:78466496C>T | Intron | MAGI2 | membrane associated | gu 42 (0.00)  | 22 (0.45)  | 1.21 |
| 11-01 | Gp3 | g.chr7:78473946C>G | Intron | MAGI2 | membrane associated | gu 35 (0.00)  | 20 (0.35)  | 0.93 |
| 11-01 | Gp3 | g.chr7:78479687A>T | Intron | MAGI2 | membrane associated | gu 23 (0.00)  | 13 (0.54)  | 1.44 |
| 11-01 | Gp3 | g.chr7:78515013T>A | Intron | MAGI2 | membrane associated | gu 51 (0.00)  | 22 (0.36)  | 0.97 |
| 11-01 | Gp3 | g.chr7:78528328G>A | Intron | MAGI2 | membrane associated | gu 39 (0.00)  | 17 (0.47)  | 1.25 |
| 11-01 | Gp3 | g.chr7:78579254C>A | Intron | MAGI2 | membrane associated | gu 38 (0.00)  | 38 (0.18)  | 0.49 |
| 11-01 | Gp3 | g.chr7:78585475T>A | Intron | MAGI2 | membrane associated | gu 61 (0.00)  | 48 (0.27)  | 0.72 |
| 11-01 | Gp3 | g.chr7:78599931A>T | Intron | MAGI2 | membrane associated | gu 24 (0.00)  | 16 (0.56)  | 1.50 |
| 11-01 | Gp3 | g.chr7:78606695C>A | Intron | MAGI2 | membrane associated | gu 40 (0.03)  | 49 (0.51)  | 1.36 |
| 11-01 | Gp3 | g.chr7:78612904C>T | Intron | MAGI2 | membrane associated | gu 58 (0.00)  | 45 (0.22)  | 0.59 |
| 11-01 | Gp3 | g.chr7:78641772G>A | Intron | MAGI2 | membrane associated | gu 34 (0.00)  | 24 (0.33)  | 0.89 |
| 11-01 | Gp3 | g.chr7:78699512G>T | Intron | MAGI2 | membrane associated | gu 20 (0.00)  | 21 (0.29)  | 0.76 |
| 11-01 | Gp3 | g.chr7:78725410G>A | Intron | MAGI2 | membrane associated | gu 76 (0.00)  | 43 (0.19)  | 0.50 |
| 11-01 | Gp3 | g.chr7:78726901C>A | Intron | MAGI2 | membrane associated | gu 81 (0.00)  | 16 (0.38)  | 1.00 |
| 11-01 | Gp3 | g.chr7:78738252G>C | Intron | MAGI2 | membrane associated | gu 72 (0.00)  | 42 (0.19)  | 0.51 |
| 11-01 | Gp3 | g.chr7:78748117C>A | Intron | MAGI2 | membrane associated | gu 107 (0.00) | 31 (0.29)  | 0.77 |
| 11-01 | Gp3 | g.chr7:78754049G>A | Intron | MAGI2 | membrane associated | gu 109 (0.00) | 115 (0.21) | 0.56 |
| 11-01 | Gp3 | g.chr7:78765768G>C | Intron | MAGI2 | membrane associated | gu 78 (0.00)  | 38 (0.42)  | 1.12 |
| 11-01 | Gp3 | g.chr7:78766286G>A | Intron | MAGI2 | membrane associated | gu 36 (0.00)  | 27 (0.30)  | 0.79 |
| 11-01 | Gp3 | g.chr7:78767068C>G | Intron | MAGI2 | membrane associated | gu 73 (0.00)  | 53 (0.21)  | 0.55 |
| 11-01 | Gp3 | g.chr7:78772133C>T | Intron | MAGI2 | membrane associated | gu 60 (0.00)  | 41 (0.17)  | 0.46 |
| 11-01 | Gp3 | g.chr7:78773800C>T | Intron | MAGI2 | membrane associated | gu 19 (0.00)  | 13 (0.54)  | 1.44 |
| 11-01 | Gp3 | g.chr7:78784736G>A | Intron | MAGI2 | membrane associated | gu 68 (0.00)  | 26 (0.19)  | 0.51 |
| 11-01 | Gp3 | g.chr7:78798819G>A | Intron | MAGI2 | membrane associated | gu 39 (0.00)  | 33 (0.18)  | 0.48 |
| 11-01 | Gp3 | g.chr7:78817911C>A | Intron | MAGI2 | membrane associated | gu 66 (0.00)  | 16 (0.38)  | 1.00 |
| 11-01 | Gp3 | g.chr7:78829362C>A | Intron | MAGI2 | membrane associated | gu 54 (0.00)  | 26 (0.19)  | 0.51 |

|       |     |                     |                   |          |          |                          |            |            |      |
|-------|-----|---------------------|-------------------|----------|----------|--------------------------|------------|------------|------|
| 11-01 | Gp3 | g.chr7:78833089G>T  | Intron            | MAGI2    |          | membrane associated gu   | 51 (0.02)  | 14 (0.36)  | 0.95 |
| 11-01 | Gp3 | g.chr7:78846880C>A  | Intron            | MAGI2    |          | membrane associated gu   | 40 (0.00)  | 23 (0.22)  | 0.58 |
| 11-01 | Gp3 | g.chr7:78848063G>C  | Intron            | MAGI2    |          | membrane associated gu   | 41 (0.00)  | 34 (0.29)  | 0.78 |
| 11-01 | Gp3 | g.chr7:78908293C>T  | Intron            | MAGI2    |          | membrane associated gu   | 106 (0.00) | 71 (0.17)  | 0.45 |
| 11-01 | Gp3 | g.chr7:78919867T>A  | Intron            | MAGI2    |          | membrane associated gu   | 41 (0.02)  | 29 (0.28)  | 0.74 |
| 11-01 | Gp3 | g.chr7:78929156G>T  | Intron            | MAGI2    |          | membrane associated gu   | 63 (0.00)  | 37 (0.24)  | 0.65 |
| 11-01 | Gp3 | g.chr7:78929514G>A  | Intron            | MAGI2    |          | membrane associated gu   | 60 (0.00)  | 52 (0.15)  | 0.41 |
| 11-01 | Gp3 | g.chr7:78930685C>T  | Intron            | MAGI2    |          | membrane associated gu   | 36 (0.00)  | 12 (0.42)  | 1.11 |
| 11-01 | Gp3 | g.chr7:78940756G>A  | Intron            | MAGI2    |          | membrane associated gu   | 117 (0.00) | 130 (0.16) | 0.43 |
| 11-01 | Gp3 | g.chr7:78941199C>G  | Intron            | MAGI2    |          | membrane associated gu   | 62 (0.00)  | 47 (0.21)  | 0.57 |
| 11-01 | Gp3 | g.chr7:78982776C>A  | Intron            | MAGI2    |          | membrane associated gu   | 71 (0.00)  | 27 (0.22)  | 0.59 |
| 11-01 | Gp3 | g.chr7:78983850G>T  | Intron            | MAGI2    |          | membrane associated gu   | 88 (0.00)  | 58 (0.21)  | 0.55 |
| 11-01 | Gp3 | g.chr7:78992992C>T  | Intron            | MAGI2    |          | membrane associated gu   | 45 (0.00)  | 16 (0.31)  | 0.83 |
| 11-01 | Gp3 | g.chr7:79023756G>A  | Intron            | MAGI2    |          | membrane associated gu   | 68 (0.00)  | 23 (0.35)  | 0.93 |
| 11-01 | Gp3 | g.chr7:79028770G>T  | Intron            | MAGI2    |          | membrane associated gu   | 47 (0.02)  | 42 (0.26)  | 0.70 |
| 11-01 | Gp3 | g.chr7:79042782C>T  | Intron            | MAGI2    |          | membrane associated gu   | 73 (0.00)  | 51 (0.41)  | 1.10 |
| 11-01 | Gp3 | g.chr7:79044579G>C  | Intron            | MAGI2    |          | membrane associated gu   | 103 (0.00) | 75 (0.31)  | 0.82 |
| 11-01 | Gp3 | g.chr7:79057185C>G  | Intron            | MAGI2    |          | membrane associated gu   | 56 (0.00)  | 44 (0.25)  | 0.67 |
| 11-01 | Gp3 | g.chr18:56377300C>T | Silent            | MALT1    | p.I307I  | mucosa associated lymph  | 32 (0.00)  | 27 (0.26)  | 0.69 |
| 11-01 | Gp3 | g.chr9:72785532C>T  | Missense Mutation | MAMDC2   | p.H546Y  | MAM domain containin     | 27 (0.00)  | 26 (0.31)  | 0.82 |
| 11-01 | Gp3 | g.chr11:95825854G>A | Silent            | MAML2    | p.A447A  | mastermind-like 2 (Dros  | 71 (0.00)  | 41 (0.22)  | 0.59 |
| 11-01 | Gp3 | g.chr1:118039497G>T | Missense Mutation | MAN1A2   | p.G466V  | mannosidase, alpha, cla  | 72 (0.00)  | 33 (0.24)  | 0.65 |
| 11-01 | Gp3 | g.chr12:27916189G>A | Missense Mutation | MANSC4   | p.P169S  | MANSC domain contain     | 158 (0.01) | 131 (0.15) | 0.39 |
| 11-01 | Gp3 | g.chr15:43818556C>T | Nonsense Mutation | MAP1A    | p.Q1867* | microtubule-associated j | 67 (0.00)  | 27 (0.37)  | 0.99 |
| 11-01 | Gp3 | g.chr1:242161885G>A | Missense Mutation | MAP1LC3C | p.P51L   | microtubule-associated j | 23 (0.00)  | 40 (0.38)  | 1.00 |
| 11-01 | Gp3 | g.chr2:210561422C>A | Missense Mutation | MAP2     | p.A1446D | microtubule-associated j | 42 (0.00)  | 14 (0.50)  | 1.33 |
| 11-01 | Gp3 | g.chr17:67532295G>A | Silent            | MAP2K6   | p.E307E  | mitogen-activated protei | 22 (0.00)  | 30 (0.20)  | 0.53 |
| 11-01 | Gp3 | g.chr5:56178236C>A  | Missense Mutation | MAP3K1   | p.T1070K | mitogen-activated protei | 30 (0.00)  | 39 (0.18)  | 0.48 |
| 11-01 | Gp3 | g.chr5:56178257C>A  | Nonsense Mutation | MAP3K1   | p.S1077* | mitogen-activated protei | 33 (0.00)  | 36 (0.19)  | 0.52 |
| 11-01 | Gp3 | g.chr17:61767726C>A | Missense Mutation | MAP3K3   | p.A385D  | mitogen-activated protei | 70 (0.00)  | 33 (0.24)  | 0.65 |
| 11-01 | Gp3 | g.chr6:161508945G>A | Missense Mutation | MAP3K4   | p.V928M  | mitogen-activated protei | 73 (0.00)  | 29 (0.17)  | 0.46 |
| 11-01 | Gp3 | g.chr6:161530934C>T | Missense Mutation | MAP3K4   | p.R1462C | mitogen-activated protei | 106 (0.00) | 40 (0.23)  | 0.60 |
| 11-01 | Gp3 | g.chr6:136990504G>A | Missense Mutation | MAP3K5   | p.T428I  | mitogen-activated protei | 111 (0.00) | 71 (0.31)  | 0.83 |
| 11-01 | Gp3 | g.chr19:39108509G>C | Missense Mutation | MAP4K1   | p.F9L    | mitogen-activated protei | 18 (0.00)  | 19 (0.47)  | 1.26 |
| 11-01 | Gp3 | g.chr11:75298305C>A | Missense Mutation | MAP6     | p.K747N  | microtubule-associated j | 100 (0.00) | 81 (0.23)  | 0.63 |



|       |     |                     |                   |         |          |                          |            |           |      |
|-------|-----|---------------------|-------------------|---------|----------|--------------------------|------------|-----------|------|
| 11-01 | Gp3 | g.chr15:52342279G>A | Missense Mutation | MAPK6   | p.M215I  | mitogen-activated protei | 30 (0.00)  | 40 (0.50) | 1.33 |
| 11-01 | Gp3 | g.chr5:179665334G>A | Missense Mutation | MAPK9   | p.S292L  | mitogen-activated protei | 53 (0.00)  | 37 (0.22) | 0.58 |
| 11-01 | Gp3 | g.chr15:42105901C>G | Missense Mutation | MAPKBP1 | p.P301R  | mitogen-activated protei | 84 (0.00)  | 30 (0.17) | 0.44 |
| 11-01 | Gp3 | g.chr17:60799902C>T | Missense Mutation | MARCH10 | p.D721N  | membrane-associated ri   | 25 (0.00)  | 40 (0.17) | 0.47 |
| 11-01 | Gp3 | g.chr5:10417406G>A  | Missense Mutation | MARCH6  | p.V725M  | membrane-associated ri   | 100 (0.00) | 39 (0.23) | 0.62 |
| 11-01 | Gp3 | g.chr2:119748200G>T | Nonsense Mutation | MARCO   | p.G367*  | macrophage receptor wi   | 46 (0.02)  | 18 (0.44) | 1.19 |
| 11-01 | Gp3 | g.chr2:198571445C>A | Nonsense Mutation | MARS2   | p.S439*  | methionyl-tRNA synthe    | 33 (0.00)  | 26 (0.19) | 0.51 |
| 11-01 | Gp3 | g.chr3:186971069C>A | Missense Mutation | MASP1   | p.C147F  | mannan-binding lectin s  | 32 (0.00)  | 26 (0.31) | 0.82 |
| 11-01 | Gp3 | g.chr3:187003676G>A | Silent            | MASP1   | p.I32I   | mannan-binding lectin s  | 43 (0.00)  | 20 (0.55) | 1.47 |
| 11-01 | Gp3 | g.chr1:11087672C>A  | Missense Mutation | MASP2   | p.R444L  | mannan-binding lectin s  | 23 (0.00)  | 13 (0.69) | 1.85 |
| 11-01 | Gp3 | g.chr19:18234060C>A | Missense Mutation | MAST3   | p.L116I  | microtubule associated ε | 15 (0.00)  | 28 (0.39) | 1.05 |
| 11-01 | Gp3 | g.chr19:18255992G>C | Missense Mutation | MAST3   | p.V969L  | microtubule associated ε | 58 (0.00)  | 43 (0.16) | 0.43 |
| 11-01 | Gp3 | g.chr2:149226434C>A | Missense Mutation | MBD5    | p.P308T  | methyl-CpG binding do    | 22 (0.00)  | 29 (0.34) | 0.92 |
| 11-01 | Gp3 | g.chr6:20118704C>G  | Missense Mutation | MBOAT1  | p.W325C  | membrane bound O-acy     | 46 (0.00)  | 38 (0.21) | 0.56 |
| 11-01 | Gp3 | g.chr18:74728936C>A | Missense Mutation | MBP     | p.R10M   | myelin basic protein     | 32 (0.00)  | 26 (0.19) | 0.51 |
| 11-01 | Gp3 | g.chr18:58038622G>A | Missense Mutation | MC4R    | p.P321S  | melanocortin 4 receptor  | 33 (0.00)  | 14 (0.50) | 1.33 |
| 11-01 | Gp3 | g.chr18:58038863A>T | Missense Mutation | MC4R    | p.N240K  | melanocortin 4 receptor  | 38 (0.00)  | 12 (0.42) | 1.11 |
| 11-01 | Gp3 | g.chrX:138684645G>T | Missense Mutation | MCF2    | p.Q662K  | MCF.2 cell line derived  | 27 (0.00)  | 14 (0.36) | 0.60 |
| 11-01 | Gp3 | g.chr3:127334746C>T | Silent            | MCM2    | p.D490D  | minichromosome maint     | 25 (0.00)  | 16 (0.69) | 1.83 |
| 11-01 | Gp3 | g.chr21:47679006C>T | Splice Site       | MCM3AP  |          | minichromosome maint     | 29 (0.00)  | 22 (0.45) | 1.21 |
| 11-01 | Gp3 | g.chr21:47703692C>A | Missense Mutation | MCM3AP  | p.G427V  | minichromosome maint     | 57 (0.00)  | 31 (0.29) | 0.77 |
| 11-01 | Gp3 | g.chr21:47703693C>A | Missense Mutation | MCM3AP  | p.G427W  | minichromosome maint     | 58 (0.00)  | 32 (0.28) | 0.75 |
| 11-01 | Gp3 | g.chr21:47704095G>T | Missense Mutation | MCM3AP  | p.S369Y  | minichromosome maint     | 72 (0.00)  | 61 (0.16) | 0.44 |
| 11-01 | Gp3 | g.chr8:48880043C>G  | Missense Mutation | MCM4    | p.T391R  | minichromosome maint     | 97 (0.00)  | 43 (0.19) | 0.50 |
| 11-01 | Gp3 | g.chr2:136630370C>G | Missense Mutation | MCM6    | p.E51Q   | minichromosome maint     | 102 (0.00) | 44 (0.23) | 0.61 |
| 11-01 | Gp3 | g.chr12:69222704C>T | Missense Mutation | MDM2    | p.S195L  | MDM2 proto-oncogene      | 95 (0.00)  | 40 (0.20) | 0.53 |
| 11-01 | Gp3 | g.chr6:90500056G>A  | Missense Mutation | MDN1    | p.S307F  | MDN1, midasin homolo     | 76 (0.00)  | 41 (0.54) | 0.85 |
| 11-01 | Gp3 | g.chr6:83949350C>A  | Missense Mutation | ME1     | p.A274S  | malic enzyme 1, NADP     | 52 (0.00)  | 38 (0.21) | 0.56 |
| 11-01 | Gp3 | g.chr18:48473428C>A | Nonsense Mutation | ME2     | p.Y543*  | malic enzyme 2, NAD(+)   | 15 (0.00)  | 16 (0.44) | 1.17 |
| 11-01 | Gp3 | g.chr11:86159283C>A | Silent            | ME3     | p.L382L  | malic enzyme 3, NADP     | 49 (0.00)  | 41 (0.15) | 0.39 |
| 11-01 | Gp3 | g.chr1:37967588C>T  | Missense Mutation | MEAF6   | p.G117E  | MYST/Esal-associated     | 56 (0.00)  | 68 (0.26) | 0.71 |
| 11-01 | Gp3 | g.chr3:150883718G>C | Missense Mutation | MED12L  | p.E481D  | mediator complex subur   | 80 (0.00)  | 42 (0.40) | 1.08 |
| 11-01 | Gp3 | g.chr3:151101985G>C | Missense Mutation | MED12L  | p.M1600I | mediator complex subur   | 51 (0.00)  | 32 (0.31) | 0.83 |
| 11-01 | Gp3 | g.chr17:60039045G>A | Silent            | MED13   | p.T1720T | mediator complex subur   | 119 (0.00) | 80 (0.16) | 0.43 |
| 11-01 | Gp3 | g.chr17:60108887G>C | Missense Mutation | MED13   | p.H309Q  | mediator complex subur   | 60 (0.00)  | 45 (0.16) | 0.41 |

|       |     |                      |                   |         |          |                                                     |            |      |
|-------|-----|----------------------|-------------------|---------|----------|-----------------------------------------------------|------------|------|
| 11-01 | Gp3 | g.chr19:39883103G>A  | Splice Site       | MED29   |          | mediator complex subunit 19 (0.00)                  | 12 (0.50)  | 1.33 |
| 11-01 | Gp3 | g.chr17:17394714C>T  | Nonsense Mutation | MED9    | p.Q116*  | mediator complex subunit 52 (0.00)                  | 37 (0.19)  | 0.50 |
| 11-01 | Gp3 | g.chr15:100252768C>T | Missense Mutation | MEF2A   | p.P429L  | myocyte enhancer factor 143 (0.00)                  | 38 (0.16)  | 0.42 |
| 11-01 | Gp3 | g.chr5:126776434G>T  | Missense Mutation | MEGF10  | p.C746F  | multiple EGF-like domain 87 (0.00)                  | 68 (0.15)  | 0.39 |
| 11-01 | Gp3 | g.chr2:66796193G>T   | Nonsense Mutation | MEIS1   | p.G376*  | Meis homeobox 1 122 (0.01)                          | 65 (0.29)  | 0.78 |
| 11-01 | Gp3 | g.chr19:47918062G>T  | Missense Mutation | MEIS3   | p.P153H  | Meis homeobox 3 31 (0.00)                           | 56 (0.14)  | 0.38 |
| 11-01 | Gp3 | g.chr6:46777180C>T   | Silent            | MEP1A   | p.L96L   | meprin A, alpha (PABA) 25 (0.04)                    | 12 (0.50)  | 1.33 |
| 11-01 | Gp3 | g.chr4:88766656C>T   | Silent            | MEPE    | p.S212S  | matrix extracellular phosphoglycan 50 (0.00)        | 21 (0.62)  | 1.65 |
| 11-01 | Gp3 | g.chr2:112765988G>A  | Silent            | MERTK   | p.E632E  | MER proto-oncogene, tyrosine kinase 33 (0.00)       | 13 (0.38)  | 1.03 |
| 11-01 | Gp3 | g.chr15:81274485G>A  | Silent            | MESDC2  | p.H84H   | mesoderm development 24 (0.00)                      | 18 (0.78)  | 2.07 |
| 11-01 | Gp3 | g.chr7:130144882C>A  | Missense Mutation | MEST    | p.F331L  | mesoderm specific transcription factor 76 (0.00)    | 55 (0.22)  | 0.58 |
| 11-01 | Gp3 | g.chr4:99978961T>C   | Missense Mutation | METAP1  | p.I330T  | methionyl aminopeptidase 23 (0.00)                  | 18 (0.44)  | 1.19 |
| 11-01 | Gp3 | g.chr12:95905757G>C  | Missense Mutation | METAP2  | p.E351Q  | methionyl aminopeptidase 24 (0.00)                  | 21 (0.38)  | 1.30 |
| 11-01 | Gp3 | g.chr6:110636581T>C  | Missense Mutation | METTL24 | p.Q174R  | methyltransferase like 2 27 (0.00)                  | 23 (0.30)  | 0.47 |
| 11-01 | Gp3 | g.chr12:82796837G>A  | Missense Mutation | METTL25 | p.E403K  | methyltransferase like 2 48 (0.00)                  | 28 (0.46)  | 1.24 |
| 11-01 | Gp3 | g.chr17:60522242G>A  | Missense Mutation | METTL2A | p.G285D  | methyltransferase like 2 50 (0.00)                  | 34 (0.21)  | 0.55 |
| 11-01 | Gp3 | g.chr17:60525092G>C  | Missense Mutation | METTL2A | p.R316T  | methyltransferase like 2 165 (0.00)                 | 69 (0.17)  | 0.46 |
| 11-01 | Gp3 | g.chr7:128141012C>A  | Missense Mutation | METTL2B | p.F324L  | methyltransferase like 2 148 (0.00)                 | 93 (0.19)  | 0.52 |
| 11-01 | Gp3 | g.chr14:21967704G>T  | Missense Mutation | METTL3  | p.Q462K  | methyltransferase like 3 69 (0.00)                  | 39 (0.23)  | 0.62 |
| 11-01 | Gp3 | g.chr15:44106856G>A  | Nonsense Mutation | MFAP1   | p.Q154*  | microfibrillar-associated protein 37 (0.00)         | 28 (0.21)  | 0.57 |
| 11-01 | Gp3 | g.chr4:170913264C>A  | Missense Mutation | MFAP3L  | p.M165I  | microfibrillar-associated protein 32 (0.00)         | 23 (0.26)  | 0.70 |
| 11-01 | Gp3 | g.chr12:8804282G>A   | Missense Mutation | MFAP5   | p.L75F   | microfibrillar associated protein 56 (0.00)         | 31 (0.16)  | 0.43 |
| 11-01 | Gp3 | g.chr2:228212100G>A  | Splice Site       | MFF     | p.R200K  | mitochondrial fission factor 75 (0.00)              | 26 (0.23)  | 0.62 |
| 11-01 | Gp3 | g.chr1:12057430C>T   | Missense Mutation | MFN2    | p.P184L  | mitofusin 2 43 (0.00)                               | 25 (0.28)  | 0.75 |
| 11-01 | Gp3 | g.chr1:12065958C>T   | Silent            | MFN2    | p.S562S  | mitofusin 2 91 (0.00)                               | 59 (0.15)  | 0.41 |
| 11-01 | Gp3 | g.chr1:40430904G>T   | Silent            | MFS2A   | p.L125L  | major facilitator superfamily 54 (0.00)             | 28 (0.18)  | 0.48 |
| 11-01 | Gp3 | g.chr15:41988355G>T  | Nonsense Mutation | MGA     | p.E383*  | MGA, MAX dimerization factor 167 (0.00)             | 177 (0.14) | 0.38 |
| 11-01 | Gp3 | g.chr15:42003201C>A  | Nonsense Mutation | MGA     | p.S913*  | MGA, MAX dimerization factor 120 (0.00)             | 53 (0.21)  | 0.55 |
| 11-01 | Gp3 | g.chr15:42040978C>T  | Missense Mutation | MGA     | p.R1786W | MGA, MAX dimerization factor 87 (0.00)              | 56 (0.14)  | 0.38 |
| 11-01 | Gp3 | g.chr15:42041335G>T  | Missense Mutation | MGA     | p.A1844S | MGA, MAX dimerization factor 90 (0.00)              | 66 (0.15)  | 0.40 |
| 11-01 | Gp3 | g.chr15:42041359C>A  | Missense Mutation | MGA     | p.P1852T | MGA, MAX dimerization factor 75 (0.00)              | 53 (0.34)  | 0.91 |
| 11-01 | Gp3 | g.chr15:42041819C>G  | Missense Mutation | MGA     | p.A2005G | MGA, MAX dimerization factor 113 (0.00)             | 105 (0.45) | 1.19 |
| 11-01 | Gp3 | g.chr7:141752219C>T  | Silent            | MGAM    | p.N977N  | maltase-glucoamylase (alpha) 62 (0.00)              | 35 (0.23)  | 0.61 |
| 11-01 | Gp3 | g.chr7:141756670C>A  | Silent            | MGAM    | p.T1207T | maltase-glucoamylase (alpha) 100 (0.00)             | 61 (0.16)  | 0.44 |
| 11-01 | Gp3 | g.chr14:50088575C>T  | Missense Mutation | MGAT2   | p.P197S  | mannosyl (alpha-1,6-)-glucosyltransferase 45 (0.00) | 47 (0.15)  | 0.40 |

|       |     |                      |                   |           |          |                         |            |            |      |
|-------|-----|----------------------|-------------------|-----------|----------|-------------------------|------------|------------|------|
| 11-01 | Gp3 | g.chr14:39716420C>T  | Silent            | MIA2      | p.V214V  | melanoma inhibitory act | 92 (0.00)  | 89 (0.18)  | 0.48 |
| 11-01 | Gp3 | g.chr11:12371424G>A  | Nonsense Mutation | MICALCL   | p.W590*  | MICAL C-terminal like   | 47 (0.00)  | 35 (0.20)  | 0.53 |
| 11-01 | Gp3 | g.chr1:67411919G>C   | Missense Mutation | MIER1     | p.E41Q   | mesoderm induction ear  | 54 (0.00)  | 32 (0.38)  | 1.00 |
| 11-01 | Gp3 | g.chr17:4789775C>T   | Missense Mutation | MINK1     | p.T268I  | misshapen-like kinase 1 | 80 (0.00)  | 84 (0.23)  | 0.60 |
| 11-01 | Gp3 | g.chr13:24443477G>C  | Silent            | MIPEP     | p.S299S  | mitochondrial intermedi | 74 (0.00)  | 56 (0.32)  | 0.86 |
| 11-01 | Gp3 | g.chr13:24443483C>G  | Silent            | MIPEP     | p.G297G  | mitochondrial intermedi | 89 (0.00)  | 63 (0.16)  | 0.42 |
| 11-01 | Gp3 | g.chr6:52013794C>A   | lincRNA           | MIR133BHG |          |                         | 58 (0.00)  | 34 (0.41)  | 1.10 |
| 11-01 | Gp3 | g.chr11:62338436C>T  | Splice Site       | MIR3654   |          | microRNA 3654           | 144 (0.00) | 88 (0.24)  | 0.64 |
| 11-01 | Gp3 | g.chr19:54194141C>T  | RNA               | MIR520A   |          | microRNA 520a           | 107 (0.00) | 57 (0.18)  | 0.47 |
| 11-01 | Gp3 | g.chr3:168269712C>T  | RNA               | MIR551B   |          | microRNA 551b           | 24 (0.00)  | 12 (0.42)  | 1.11 |
| 11-01 | Gp3 | g.chr17:5392666C>A   | Missense Mutation | MIS12     | p.L162I  | MIS12 kinetochore com   | 97 (0.00)  | 103 (0.31) | 0.83 |
| 11-01 | Gp3 | g.chr14:45693434C>G  | Missense Mutation | MIS18BP1  | p.A786P  | MIS18 binding protein   | 148 (0.00) | 47 (0.15)  | 0.40 |
| 11-01 | Gp3 | g.chr10:129904227C>A | Missense Mutation | MKI67     | p.E1959D | marker of proliferation | 143 (0.00) | 42 (0.24)  | 0.63 |
| 11-01 | Gp3 | g.chr10:129904719G>C | Missense Mutation | MKI67     | p.I1795M | marker of proliferation | 138 (0.00) | 40 (0.25)  | 0.67 |
| 11-01 | Gp3 | g.chr20:10393924G>A  | Missense Mutation | MKKS      | p.S80F   | McKusick-Kaufman syr    | 70 (0.00)  | 51 (0.20)  | 0.52 |
| 11-01 | Gp3 | g.chr16:14345755C>T  | Missense Mutation | MKL2      | p.P764S  | MKL/myocardin-like 2    | 51 (0.00)  | 20 (0.25)  | 0.67 |
| 11-01 | Gp3 | g.chr16:14345814C>G  | Missense Mutation | MKL2      | p.N783K  | MKL/myocardin-like 2    | 46 (0.00)  | 19 (0.37)  | 0.98 |
| 11-01 | Gp3 | g.chr3:37061895C>T   | Nonsense Mutation | MLH1      | p.Q86*   | mutL homolog 1          | 55 (0.00)  | 47 (0.23)  | 0.62 |
| 11-01 | Gp3 | g.chr3:37089121C>A   | Missense Mutation | MLH1      | p.L374M  | mutL homolog 1          | 38 (0.00)  | 33 (0.52)  | 1.37 |
| 11-01 | Gp3 | g.chr14:75514630C>T  | Missense Mutation | MLH3      | p.A577T  | mutL homolog 3          | 75 (0.00)  | 42 (0.26)  | 0.70 |
| 11-01 | Gp3 | g.chr1:233518169C>T  | Silent            | MLK4      | p.I941I  |                         | 51 (0.00)  | 23 (0.22)  | 0.58 |
| 11-01 | Gp3 | g.chr16:74716628C>G  | Missense Mutation | MLKL      | p.E293Q  | mixed lineage kinase do | 35 (0.00)  | 38 (0.21)  | 0.56 |
| 11-01 | Gp3 | g.chr16:74729196C>A  | Splice Site       | MLKL      | p.D154Y  | mixed lineage kinase do | 42 (0.00)  | 34 (0.38)  | 1.02 |
| 11-01 | Gp3 | g.chr4:146567269G>C  | Missense Mutation | MMAA      | p.E232Q  | methylmalonic aciduria  | 121 (0.00) | 36 (0.19)  | 0.52 |
| 11-01 | Gp3 | g.chr11:102667893C>A | Splice Site       | MMP1      | p.R117S  | matrix metallopeptidase | 41 (0.00)  | 34 (0.21)  | 0.55 |
| 11-01 | Gp3 | g.chr11:102643737C>T | Splice Site       | MMP10     | p.G356E  | matrix metallopeptidase | 20 (0.00)  | 13 (0.54)  | 1.44 |
| 11-01 | Gp3 | g.chr11:102742630G>A | RNA               | MMP12     |          | matrix metallopeptidase | 28 (0.00)  | 22 (0.23)  | 0.61 |
| 11-01 | Gp3 | g.chr11:102742631G>A | RNA               | MMP12     |          | matrix metallopeptidase | 31 (0.00)  | 21 (0.24)  | 0.63 |
| 11-01 | Gp3 | g.chr11:102824965G>T | Missense Mutation | MMP13     | p.A186D  | matrix metallopeptidase | 36 (0.00)  | 30 (0.17)  | 0.44 |
| 11-01 | Gp3 | g.chr11:102495929G>A | Missense Mutation | MMP20     | p.A41V   | matrix metallopeptidase | 43 (0.00)  | 41 (0.29)  | 0.78 |
| 11-01 | Gp3 | g.chr6:97677083C>A   | Missense Mutation | MMS22L    | p.A576S  | MMS22-like, DNA repa    | 44 (0.00)  | 13 (0.38)  | 0.60 |
| 11-01 | Gp3 | g.chr6:97677093C>A   | Missense Mutation | MMS22L    | p.K572N  | MMS22-like, DNA repa    | 50 (0.00)  | 20 (0.55)  | 0.85 |
| 11-01 | Gp3 | g.chr18:33778689C>A  | Missense Mutation | MOCOS     | p.T90N   | molybdenum cofactor st  | 33 (0.00)  | 12 (0.50)  | 1.33 |
| 11-01 | Gp3 | g.chr20:49576643G>T  | Missense Mutation | MOCS3     | p.V422L  | molybdenum cofactor sy  | 18 (0.00)  | 11 (0.73)  | 1.94 |
| 11-01 | Gp3 | g.chr2:74690433C>T   | Silent            | MOGS      | p.E220E  | mannosyl-oligosacchari  | 62 (0.02)  | 28 (0.36)  | 0.54 |

|       |     |                      |                   |          |          |                          |              |            |      |
|-------|-----|----------------------|-------------------|----------|----------|--------------------------|--------------|------------|------|
| 11-01 | Gp3 | g.chr16:77228430C>A  | Nonsense Mutation | MON1B    | p.S116*  | MON1 secretory traffick  | 19 (0.00)    | 13 (0.54)  | 1.44 |
| 11-01 | Gp3 | g.chr9:124931986C>G  | Silent            | MORN5    | p.G86G   | MORN repeat containin    | 90 (0.00)    | 80 (0.16)  | 0.43 |
| 11-01 | Gp3 | g.chr9:13140078G>A   | Missense Mutation | MPDZ     | p.A1304V | multiple PDZ domain p    | 167 (0.00)   | 89 (0.48)  | 0.76 |
| 11-01 | Gp3 | g.chr11:58978599G>A  | Silent            | MPEG1    | p.S580S  | macrophage expressed     | 118 (0.00)   | 16 (0.38)  | 1.00 |
| 11-01 | Gp3 | g.chr16:133062G>C    | Silent            | MPG      | p.R109R  | N-methylpurine-DNA g     | 37 (0.00)    | 42 (0.19)  | 0.51 |
| 11-01 | Gp3 | g.chr12:123645802C>A | Nonsense Mutation | MPHOSPH9 | p.E1088* | M-phase phosphoprotein   | 80 (0.00)    | 53 (0.19)  | 0.50 |
| 11-01 | Gp3 | g.chr12:123687393G>A | Missense Mutation | MPHOSPH9 | p.S520F  | M-phase phosphoprotein   | 43 (0.00)    | 29 (0.28)  | 0.74 |
| 11-01 | Gp3 | g.chr2:27535933C>T   | Missense Mutation | MPV17    | p.G27R   | MpV17 mitochondrial i    | 28 (0.00)    | 21 (0.43)  | 1.14 |
| 11-01 | Gp3 | g.chr4:6642607C>T    | Silent            | MRFAP1   | p.I6I    | Morf4 family associated  | 34 (0.00)    | 42 (0.14)  | 0.38 |
| 11-01 | Gp3 | g.chr11:18956171C>A  | Missense Mutation | MRGPRX1  | p.C54F   | MAS-related GPR, men     | 49 (0.02)    | 34 (0.18)  | 0.47 |
| 11-01 | Gp3 | g.chr11:18195292C>G  | Missense Mutation | MRGPRX4  | p.F163L  | MAS-related GPR, men     | 69 (0.00)    | 55 (0.31)  | 0.82 |
| 11-01 | Gp3 | g.chr5:41055906C>T   | Missense Mutation | MROH2B   | p.S324N  | maestro heat-like repeat | 89 (0.00)    | 39 (0.41)  | 1.09 |
| 11-01 | Gp3 | g.chr8:142505493C>T  | RNA               | MROH5    |          | maestro heat-like repeat | 31 (0.00)    | 26 (0.38)  | 1.03 |
| 11-01 | Gp3 | g.chr1:55158122C>T   | Silent            | MROH7    | p.L913L  | maestro heat-like repeat | 38 (0.00)    | 29 (0.72)  | 1.93 |
| 11-01 | Gp3 | g.chr20:35742391A>G  | Splice Site       | MROH8    |          | maestro heat-like repeat | 63 (0.00)    | 48 (0.15)  | 0.39 |
| 11-01 | Gp3 | g.chr8:55060038C>T   | Missense Mutation | MRPL15   | p.A217V  | mitochondrial ribosoma   | 24 (0.00)    | 46 (0.15)  | 0.51 |
| 11-01 | Gp3 | g.chr11:59573975C>A  | Missense Mutation | MRPL16   | p.D201Y  | mitochondrial ribosoma   | 51 (0.00)    | 37 (0.19)  | 0.50 |
| 11-01 | Gp3 | g.chr6:42176037C>A   | Missense Mutation | MRPS10   | p.S199I  | mitochondrial ribosoma   | 57 (0.00)    | 84 (0.35)  | 0.92 |
| 11-01 | Gp3 | g.chr6:42176053C>A   | Nonsense Mutation | MRPS10   | p.E194*  | mitochondrial ribosoma   | 50 (0.02)    | 70 (0.14)  | 0.38 |
| 11-01 | Gp3 | g.chr19:39423003C>G  | Missense Mutation | MRPS12   | p.T27S   | mitochondrial ribosoma   | 28 (0.00)    | 46 (0.15)  | 0.41 |
| 11-01 | Gp3 | g.chr3:15094121C>A   | Missense Mutation | MRPS25   | p.R87S   | mitochondrial ribosoma   | 59 (0.00)    | 37 (0.41)  | 1.08 |
| 11-01 | Gp3 | g.chr17:73258946C>T  | Nonsense Mutation | MRPS7    | p.Q113*  | mitochondrial ribosoma   | 32 (0.00)    | 17 (0.35)  | 0.94 |
| 11-01 | Gp3 | g.chr9:125033266G>A  | Silent            | MRRF     | p.K32K   | mitochondrial ribosome   | 265 (0.00)   | 190 (0.23) | 0.62 |
| 11-01 | Gp3 | g.chr1:19583972G>A   | Missense Mutation | MRTO4    | p.V100M  | mRNA turnover 4 hom      | 144 (0.01)   | 86 (0.16)  | 0.43 |
| 11-01 | Gp3 | g.chr11:10648112C>A  | Missense Mutation | MRVI1    | p.A257S  | murine retrovirus integr | 46 (0.00)    | 40 (0.20)  | 0.53 |
| 11-01 | Gp3 | g.chr11:60231788G>T  | Missense Mutation | MS4A1    | p.A103S  | membrane-spanning 4-d    | 54 (0.00)    | 40 (0.20)  | 0.53 |
| 11-01 | Gp3 | g.chr11:124637460A>C | Missense Mutation | MSANTD2  | p.I431S  | Myb/SANT-like DNA-t      | 17 (0.00)    | 11 (0.55)  | 1.45 |
| 11-01 | Gp3 | g.chr2:47643563G>A   | Silent            | MSH2     | p.E357E  | mutS homolog 2           | 37 (0.00)    | 32 (0.16)  | 0.42 |
| 11-01 | Gp3 | g.chr5:80150109G>A   | Missense Mutation | MSH3     | p.A992T  | mutS homolog 3           | 78 (0.00)    | 49 (0.47)  | 1.25 |
| 11-01 | Gp3 | g.chr3:135871387C>T  | Silent            | MSL2     | p.Q112Q  | male-specific lethal 2   | hc 43 (0.00) | 28 (0.61)  | 1.62 |
| 11-01 | Gp3 | g.chr10:75184896G>A  | Missense Mutation | MSS51    | p.L375F  | MSS51 mitochondrial tr   | 78 (0.00)    | 46 (0.24)  | 0.64 |
| 11-01 | Gp3 | g.chr2:190922014C>G  | Silent            | MSTN     | p.A366A  | myostatin                | 52 (0.00)    | 47 (0.17)  | 0.45 |
| 11-01 | Gp3 | g.chr16:56670818G>A  | RNA               | MT1JP    |          | metallothionein 1J, pseu | 101 (0.01)   | 125 (0.17) | 0.45 |
| 11-01 | Gp3 | g.chr16:56667316G>A  | Splice Site       | MT1M     | p.K31K   | metallothionein 1M       | 52 (0.00)    | 27 (0.19)  | 0.49 |
| 11-01 | Gp3 | g.chr2:42909604G>A   | Missense Mutation | MTA3     | p.V256I  | metastasis associated 1  | 167 (0.00)   | 90 (0.27)  | 0.71 |

|       |     |                     |                   |         |           |                                   |            |            |      |
|-------|-----|---------------------|-------------------|---------|-----------|-----------------------------------|------------|------------|------|
| 11-01 | Gp3 | g.chr1:38280964C>G  | Missense Mutation | MTF1    | p.E702D   | metal-regulatory transcr          | 57 (0.02)  | 189 (0.76) | 2.02 |
| 11-01 | Gp3 | g.chr1:38304382C>T  | Missense Mutation | MTF1    | p.E232K   | metal-regulatory transcr          | 31 (0.00)  | 17 (0.35)  | 0.94 |
| 11-01 | Gp3 | g.chr20:60768617C>T | Silent            | MTG2    | p.G47G    | mitochondrial ribosome            | 34 (0.00)  | 29 (0.24)  | 0.64 |
| 11-01 | Gp3 | g.chr6:151247409G>T | Nonsense Mutation | MTHFD1L | p.G412*   | methylenetetrahydrofolate         | 41 (0.00)  | 22 (0.50)  | 1.33 |
| 11-01 | Gp3 | g.chr2:74438403G>A  | Missense Mutation | MTHFD2  | p.V250I   | methylenetetrahydrofolate         | 105 (0.00) | 35 (0.26)  | 0.39 |
| 11-01 | Gp3 | g.chr2:55481875C>A  | Nonsense Mutation | MTIF2   | p.E140*   | mitochondrial translation         | 38 (0.00)  | 43 (0.21)  | 0.56 |
| 11-01 | Gp3 | g.chr15:31239475G>A | Missense Mutation | MTMR10  | p.A469V   | myotubularin related protein      | 68 (0.00)  | 46 (0.28)  | 0.75 |
| 11-01 | Gp3 | g.chr1:149906117C>A | Missense Mutation | MTMR11  | p.S145I   | myotubularin related protein      | 31 (0.00)  | 38 (0.18)  | 0.49 |
| 11-01 | Gp3 | g.chr3:9714399C>A   | Silent            | MTMR14  | p.A236A   | myotubularin related protein      | 37 (0.00)  | 35 (0.23)  | 0.61 |
| 11-01 | Gp3 | g.chr1:11188096C>T  | Missense Mutation | MTOR    | p.E2000K  | mechanistic target of rapamycin   | 139 (0.00) | 50 (0.22)  | 0.59 |
| 11-01 | Gp3 | g.chr10:30615506G>C | Missense Mutation | MTPAP   | p.A280G   | mitochondrial poly(A) polymerase  | 52 (0.00)  | 79 (0.23)  | 0.61 |
| 11-01 | Gp3 | g.chr10:30625844G>T | Missense Mutation | MTPAP   | p.P223Q   | mitochondrial poly(A) polymerase  | 98 (0.00)  | 37 (0.16)  | 0.43 |
| 11-01 | Gp3 | g.chr1:236966919G>A | Missense Mutation | MTR     | p.D76N    | 5-methyltetrahydrofolate          | 59 (0.00)  | 26 (0.27)  | 0.51 |
| 11-01 | Gp3 | g.chr13:41834950G>A | Nonsense Mutation | MTRF1   | p.Q32*    | mitochondrial translation         | 59 (0.00)  | 73 (0.16)  | 0.44 |
| 11-01 | Gp3 | g.chr5:7886756G>A   | Silent            | MTRR    | p.A362A   | 5-methyltetrahydrofolate          | 75 (0.00)  | 44 (0.16)  | 0.42 |
| 11-01 | Gp3 | g.chr7:100648276G>A | Missense Mutation | MUC12   | p.G4954D  | mucin 12, cell surface associated | 44 (0.00)  | 42 (0.17)  | 0.44 |
| 11-01 | Gp3 | g.chr7:100648457G>T | Missense Mutation | MUC12   | p.M5014I  | mucin 12, cell surface associated | 84 (0.00)  | 32 (0.19)  | 0.50 |
| 11-01 | Gp3 | g.chr3:124641127A>G | Missense Mutation | MUC13   | p.S220P   | mucin 13, cell surface associated | 94 (0.00)  | 79 (0.19)  | 0.51 |
| 11-01 | Gp3 | g.chr19:8999431C>T  | Missense Mutation | MUC16   | p.G13582S | mucin 16, cell surface associated | 251 (0.00) | 44 (0.27)  | 0.73 |
| 11-01 | Gp3 | g.chr19:9047542C>A  | Missense Mutation | MUC16   | p.R11363S | mucin 16, cell surface associated | 163 (0.00) | 63 (0.27)  | 0.72 |
| 11-01 | Gp3 | g.chr19:9047912G>A  | Missense Mutation | MUC16   | p.A11240V | mucin 16, cell surface associated | 31 (0.00)  | 15 (0.40)  | 1.07 |
| 11-01 | Gp3 | g.chr19:9048635G>A  | Missense Mutation | MUC16   | p.T10999I | mucin 16, cell surface associated | 96 (0.00)  | 43 (0.21)  | 0.56 |
| 11-01 | Gp3 | g.chr19:9050139C>T  | Missense Mutation | MUC16   | p.V10498I | mucin 16, cell surface associated | 89 (0.00)  | 54 (0.17)  | 0.44 |
| 11-01 | Gp3 | g.chr19:9059156G>A  | Silent            | MUC16   | p.N9430N  | mucin 16, cell surface associated | 105 (0.00) | 49 (0.33)  | 0.87 |
| 11-01 | Gp3 | g.chr19:9059399G>A  | Silent            | MUC16   | p.T9349T  | mucin 16, cell surface associated | 172 (0.00) | 34 (0.21)  | 0.55 |
| 11-01 | Gp3 | g.chr19:9065814G>A  | Missense Mutation | MUC16   | p.P7211L  | mucin 16, cell surface associated | 73 (0.00)  | 52 (0.21)  | 0.56 |
| 11-01 | Gp3 | g.chr19:9066659G>A  | Silent            | MUC16   | p.S6929S  | mucin 16, cell surface associated | 165 (0.00) | 93 (0.17)  | 0.46 |
| 11-01 | Gp3 | g.chr19:9068139C>A  | Missense Mutation | MUC16   | p.G6436V  | mucin 16, cell surface associated | 112 (0.00) | 105 (0.23) | 0.61 |
| 11-01 | Gp3 | g.chr19:9068630C>T  | Silent            | MUC16   | p.V6272V  | mucin 16, cell surface associated | 65 (0.00)  | 71 (0.24)  | 0.64 |
| 11-01 | Gp3 | g.chr19:9073240G>A  | Missense Mutation | MUC16   | p.P4736S  | mucin 16, cell surface associated | 179 (0.01) | 129 (0.15) | 0.39 |
| 11-01 | Gp3 | g.chr19:9077241G>A  | Missense Mutation | MUC16   | p.T3402I  | mucin 16, cell surface associated | 162 (0.00) | 100 (0.21) | 0.56 |
| 11-01 | Gp3 | g.chr19:9084156T>A  | Silent            | MUC16   | p.G2553G  | mucin 16, cell surface associated | 120 (0.01) | 100 (0.15) | 0.40 |
| 11-01 | Gp3 | g.chr19:9084680C>A  | Missense Mutation | MUC16   | p.A2379S  | mucin 16, cell surface associated | 72 (0.00)  | 38 (0.37)  | 0.98 |
| 11-01 | Gp3 | g.chr19:9085128C>A  | Missense Mutation | MUC16   | p.L2229F  | mucin 16, cell surface associated | 63 (0.00)  | 36 (0.50)  | 1.33 |
| 11-01 | Gp3 | g.chr19:9086063C>T  | Missense Mutation | MUC16   | p.G1918R  | mucin 16, cell surface associated | 146 (0.00) | 59 (0.17)  | 0.45 |

|       |     |                      |                   |         |          |                                      |            |      |
|-------|-----|----------------------|-------------------|---------|----------|--------------------------------------|------------|------|
| 11-01 | Gp3 | g.chr19:9086065G>C   | Missense Mutation | MUC16   | p.P1917R | mucin 16, cell surface a:144 (0.00)  | 58 (0.16)  | 0.41 |
| 11-01 | Gp3 | g.chr19:9088078G>A   | Missense Mutation | MUC16   | p.T1246I | mucin 16, cell surface a:114 (0.00)  | 76 (0.22)  | 0.60 |
| 11-01 | Gp3 | g.chr19:9088858G>T   | Nonsense Mutation | MUC16   | p.S986*  | mucin 16, cell surface a:172 (0.01)  | 46 (0.46)  | 1.22 |
| 11-01 | Gp3 | g.chr7:100674448C>T  | Nonsense Mutation | MUC17   | p.Q44*   | mucin 17, cell surface a:69 (0.00)   | 45 (0.22)  | 0.59 |
| 11-01 | Gp3 | g.chr7:100675194C>A  | Missense Mutation | MUC17   | p.T166N  | mucin 17, cell surface a:42 (0.00)   | 34 (0.53)  | 1.41 |
| 11-01 | Gp3 | g.chr7:100679669T>C  | Missense Mutation | MUC17   | p.S1658P | mucin 17, cell surface a:76 (0.00)   | 54 (0.17)  | 0.44 |
| 11-01 | Gp3 | g.chr7:100679676G>A  | Missense Mutation | MUC17   | p.S1660N | mucin 17, cell surface a:75 (0.00)   | 52 (0.15)  | 0.41 |
| 11-01 | Gp3 | g.chr7:100679856C>T  | Missense Mutation | MUC17   | p.P1720L | mucin 17, cell surface a:189 (0.00)  | 107 (0.19) | 0.50 |
| 11-01 | Gp3 | g.chr11:1092417C>G   | Missense Mutation | MUC2    | p.S1412R | mucin 2, oligomeric mu 17 (0.00)     | 26 (0.31)  | 0.82 |
| 11-01 | Gp3 | g.chr11:1265777C>T   | Missense Mutation | MUC5B   | p.T2556I | mucin 5B, oligomeric m 153 (0.00)    | 56 (0.18)  | 0.48 |
| 11-01 | Gp3 | g.chr11:1267898C>T   | Missense Mutation | MUC5B   | p.S3263F | mucin 5B, oligomeric m 104 (0.00)    | 100 (0.36) | 0.96 |
| 11-01 | Gp3 | g.chr9:113530242G>A  | Missense Mutation | MUSK    | p.A355T  | muscle, skeletal, receptc 81 (0.00)  | 49 (0.18)  | 0.49 |
| 11-01 | Gp3 | g.chr9:113562694G>A  | Missense Mutation | MUSK    | p.S679N  | muscle, skeletal, receptc 103 (0.00) | 33 (0.18)  | 0.48 |
| 11-01 | Gp3 | g.chr6:49416594G>C   | Missense Mutation | MUT     | p.A460G  | methylmalonyl CoA mu 74 (0.00)       | 28 (0.21)  | 0.57 |
| 11-01 | Gp3 | g.chr10:112038940G>A | Missense Mutation | MXI1    | p.R147Q  | MAX interactor 1, dime 75 (0.00)     | 62 (0.60)  | 1.59 |
| 11-01 | Gp3 | g.chrX:3241466G>A    | Missense Mutation | MXRA5   | p.P754S  | matrix-remodelling asso 36 (0.00)    | 26 (0.42)  | 0.71 |
| 11-01 | Gp3 | g.chr17:4442839G>A   | Silent            | MYBBP1A | p.V1286V | MYB binding protein (F44 (0.00)      | 28 (0.29)  | 0.76 |
| 11-01 | Gp3 | g.chr8:67488365C>T   | Silent            | MYBL1   | p.K449K  | v-myb avian myeloblast 55 (0.00)     | 18 (0.28)  | 0.92 |
| 11-01 | Gp3 | g.chr20:42343854C>A  | Missense Mutation | MYBL2   | p.F635L  | v-myb avian myeloblast 90 (0.00)     | 45 (0.18)  | 0.47 |
| 11-01 | Gp3 | g.chr13:77672819G>A  | Missense Mutation | MYCBP2  | p.P2786S | MYC binding protein 2, 67 (0.00)     | 52 (0.15)  | 0.41 |
| 11-01 | Gp3 | g.chr13:77739493G>A  | Missense Mutation | MYCBP2  | p.S2087L | MYC binding protein 2, 20 (0.00)     | 23 (0.43)  | 1.16 |
| 11-01 | Gp3 | g.chr13:77785394C>T  | Silent            | MYCBP2  | p.V1070V | MYC binding protein 2, 27 (0.00)     | 20 (0.35)  | 0.93 |
| 11-01 | Gp3 | g.chr13:77786180C>G  | Missense Mutation | MYCBP2  | p.G1020A | MYC binding protein 2, 51 (0.00)     | 36 (0.22)  | 0.59 |
| 11-01 | Gp3 | g.chr1:40363420C>G   | Missense Mutation | MYCL    | p.R270T  | v-myc avian myelocytot 35 (0.00)     | 14 (0.36)  | 0.95 |
| 11-01 | Gp3 | g.chr17:10404651C>G  | Missense Mutation | MYH1    | p.E1172Q | myosin, heavy chain 1, :88 (0.00)    | 32 (0.38)  | 1.00 |
| 11-01 | Gp3 | g.chr17:10231375C>T  | Nonsense Mutation | MYH13   | p.W833*  | myosin, heavy chain 13, 61 (0.00)    | 29 (0.21)  | 0.55 |
| 11-01 | Gp3 | g.chr17:10258017C>A  | Nonsense Mutation | MYH13   | p.E329*  | myosin, heavy chain 13, 50 (0.00)    | 26 (0.23)  | 0.62 |
| 11-01 | Gp3 | g.chr17:10258048T>A  | Silent            | MYH13   | p.G318G  | myosin, heavy chain 13, 38 (0.00)    | 35 (0.23)  | 0.61 |
| 11-01 | Gp3 | g.chr3:108163626T>C  | Missense Mutation | MYH15   | p.E859G  | myosin, heavy chain 15 51 (0.00)     | 32 (0.31)  | 0.83 |
| 11-01 | Gp3 | g.chr3:108163630C>T  | Missense Mutation | MYH15   | p.G858R  | myosin, heavy chain 15 48 (0.00)     | 32 (0.31)  | 0.83 |
| 11-01 | Gp3 | g.chr17:10450920C>T  | Missense Mutation | MYH2    | p.D74N   | myosin, heavy chain 2, :44 (0.00)    | 46 (0.28)  | 0.75 |
| 11-01 | Gp3 | g.chr17:10450928G>T  | Missense Mutation | MYH2    | p.T71K   | myosin, heavy chain 2, :44 (0.02)    | 44 (0.23)  | 0.61 |
| 11-01 | Gp3 | g.chr17:10451041C>A  | Missense Mutation | MYH2    | p.G66V   | myosin, heavy chain 2, :57 (0.00)    | 11 (0.73)  | 1.94 |
| 11-01 | Gp3 | g.chr17:10536005C>A  | Nonsense Mutation | MYH3    | p.E1582* | myosin, heavy chain 3, :93 (0.00)    | 44 (0.18)  | 0.48 |
| 11-01 | Gp3 | g.chr17:10558361C>A  | Missense Mutation | MYH3    | p.M7I    | myosin, heavy chain 3, :72 (0.00)    | 34 (0.21)  | 0.55 |

|       |     |                      |                   |        |          |                                         |            |      |
|-------|-----|----------------------|-------------------|--------|----------|-----------------------------------------|------------|------|
| 11-01 | Gp3 | g.chr17:10348564G>T  | Missense Mutation | MYH4   | p.A1762D | myosin, heavy chain 4, s110 (0.00)      | 50 (0.24)  | 0.64 |
| 11-01 | Gp3 | g.chr17:10358013C>A  | Missense Mutation | MYH4   | p.E850D  | myosin, heavy chain 4, s129 (0.00)      | 86 (0.16)  | 0.43 |
| 11-01 | Gp3 | g.chr17:10367997C>A  | Splice Site       | MYH4   |          | myosin, heavy chain 4, s53 (0.00)       | 56 (0.16)  | 0.43 |
| 11-01 | Gp3 | g.chr14:23884417C>G  | Missense Mutation | MYH7   | p.M1782I | myosin, heavy chain 7, s40 (0.00)       | 41 (0.29)  | 0.78 |
| 11-01 | Gp3 | g.chr20:33568414C>T  | Missense Mutation | MYH7B  | p.P168S  | myosin, heavy chain 7B s86 (0.00)       | 56 (0.14)  | 0.38 |
| 11-01 | Gp3 | g.chr20:33568515C>G  | Missense Mutation | MYH7B  | p.N201K  | myosin, heavy chain 7B s15 (0.00)       | 22 (0.45)  | 1.21 |
| 11-01 | Gp3 | g.chr17:10310068C>T  | Missense Mutation | MYH8   | p.G704S  | myosin, heavy chain 8, s76 (0.00)       | 29 (0.17)  | 0.46 |
| 11-01 | Gp3 | g.chr22:36714311G>A  | Missense Mutation | MYH9   | p.L390F  | myosin, heavy chain 9, s151 (0.00)      | 26 (0.23)  | 0.62 |
| 11-01 | Gp3 | g.chr16:46755077G>A  | Missense Mutation | MYLK3  | p.T307I  | myosin light chain kinase s57 (0.00)    | 47 (0.19)  | 0.51 |
| 11-01 | Gp3 | g.chr3:169492117G>C  | Missense Mutation | MYNN   | p.E12Q   | myoneurin s64 (0.00)                    | 40 (0.15)  | 0.40 |
| 11-01 | Gp3 | g.chr17:27421767C>A  | Silent            | MYO18A | p.L1537L | myosin XVIIIa s50 (0.00)                | 33 (0.48)  | 1.29 |
| 11-01 | Gp3 | g.chr2:192225382T>A  | Silent            | MYO1B  | p.V196V  | myosin IB s168 (0.00)                   | 59 (0.24)  | 0.63 |
| 11-01 | Gp3 | g.chr17:1381424G>A   | Missense Mutation | MYO1C  | p.T418M  | myosin IC s19 (0.00)                    | 24 (0.25)  | 0.67 |
| 11-01 | Gp3 | g.chr15:59515276C>T  | Missense Mutation | MYO1E  | p.A298T  | myosin IE s68 (0.00)                    | 24 (0.25)  | 0.67 |
| 11-01 | Gp3 | g.chr15:59553664C>A  | Missense Mutation | MYO1E  | p.Q64H   | myosin IE s71 (0.00)                    | 39 (0.18)  | 0.48 |
| 11-01 | Gp3 | g.chr12:109838964G>A | Missense Mutation | MYO1H  | p.E197K  | myosin IH s65 (0.00)                    | 57 (0.21)  | 0.56 |
| 11-01 | Gp3 | g.chr2:171240280G>A  | Missense Mutation | MYO3B  | p.A416T  | myosin IIIB s51 (0.00)                  | 15 (0.40)  | 1.07 |
| 11-01 | Gp3 | g.chr2:171264249C>T  | Missense Mutation | MYO3B  | p.L849F  | myosin IIIB s153 (0.01)                 | 113 (0.24) | 0.64 |
| 11-01 | Gp3 | g.chr2:171509509G>A  | Missense Mutation | MYO3B  | p.D1302N | myosin IIIB s34 (0.00)                  | 63 (0.44)  | 1.19 |
| 11-01 | Gp3 | g.chr18:47566666C>A  | Missense Mutation | MYO5B  | p.D53Y   | myosin VB s70 (0.00)                    | 18 (0.28)  | 0.74 |
| 11-01 | Gp3 | g.chr15:52517714C>G  | Missense Mutation | MYO5C  | p.E1075Q | myosin VC s38 (0.00)                    | 26 (0.27)  | 0.72 |
| 11-01 | Gp3 | g.chr2:128341711G>C  | Missense Mutation | MYO7B  | p.C453S  | myosin VIIb s83 (0.00)                  | 71 (0.24)  | 0.64 |
| 11-01 | Gp3 | g.chr19:17256288G>T  | Missense Mutation | MYO9B  | p.G308C  | myosin IXb s42 (0.00)                   | 24 (0.33)  | 0.89 |
| 11-01 | Gp3 | g.chr18:3126880G>T   | Missense Mutation | MYOM1  | p.P937H  | myomesin 1 s52 (0.00)                   | 26 (0.19)  | 0.51 |
| 11-01 | Gp3 | g.chr18:3135560C>G   | Missense Mutation | MYOM1  | p.V732L  | myomesin 1 s42 (0.00)                   | 23 (0.48)  | 1.28 |
| 11-01 | Gp3 | g.chr11:61545950G>A  | Missense Mutation | MYRF   | p.V668M  | myelin regulatory factor s51 (0.00)     | 34 (0.15)  | 0.39 |
| 11-01 | Gp3 | g.chr11:61548617C>A  | Silent            | MYRF   | p.T860T  | myelin regulatory factor s45 (0.02)     | 31 (0.19)  | 0.52 |
| 11-01 | Gp3 | g.chr20:62838947G>T  | Splice Site       | MYT1   | p.G133V  | myelin transcription factor s35 (0.00)  | 38 (0.21)  | 0.56 |
| 11-01 | Gp3 | g.chr20:62848635G>A  | Splice Site       | MYT1   |          | myelin transcription factor s49 (0.00)  | 33 (0.27)  | 0.73 |
| 11-01 | Gp3 | g.chr2:1891298C>T    | Silent            | MYT1L  | p.K866K  | myelin transcription factor s129 (0.00) | 100 (0.20) | 0.53 |
| 11-01 | Gp3 | g.chr15:57921976C>T  | Missense Mutation | MYZAP  | p.A201V  | myocardial zonula adhesion s41 (0.00)   | 22 (0.27)  | 0.73 |
| 11-01 | Gp3 | g.chr16:48580077G>T  | Missense Mutation | N4BP1  | p.Q772K  | NEDD4 binding protein s105 (0.00)       | 109 (0.18) | 0.49 |
| 11-01 | Gp3 | g.chr4:40121835C>T   | Nonsense Mutation | N4BP2  | p.Q702*  | NEDD4 binding protein s39 (0.00)        | 29 (0.21)  | 0.55 |
| 11-01 | Gp3 | g.chr13:41897299G>A  | Silent            | NAA16  | p.L170L  | N(alpha)-acetyltransferase s60 (0.00)   | 20 (0.30)  | 0.80 |
| 11-01 | Gp3 | g.chr12:112481511C>A | Missense Mutation | NAA25  | p.R723L  | N(alpha)-acetyltransferase s83 (0.00)   | 52 (0.19)  | 0.51 |

|       |     |                      |                   |         |          |                            |            |            |      |
|-------|-----|----------------------|-------------------|---------|----------|----------------------------|------------|------------|------|
| 11-01 | Gp3 | g.chr12:56620177C>T  | Missense Mutation | NABP2   | p.T137I  | nucleic acid binding pro   | 62 (0.00)  | 61 (0.30)  | 0.79 |
| 11-01 | Gp3 | g.chr11:71184393G>A  | Missense Mutation | NADSYN1 | p.E177K  | NAD synthetase 1           | 40 (0.03)  | 32 (0.22)  | 0.58 |
| 11-01 | Gp3 | g.chr22:42463190C>A  | Missense Mutation | NAGA    | p.Q143H  | N-acetylgalactosaminid     | 38 (0.00)  | 21 (0.24)  | 0.63 |
| 11-01 | Gp3 | g.chr13:101997663C>G | Silent            | NALCN   | p.L251L  | sodium leak channel, no    | 69 (0.00)  | 37 (0.16)  | 0.43 |
| 11-01 | Gp3 | g.chr9:100840508C>T  | Missense Mutation | NANS    | p.S161L  | N-acetylneuraminic acic    | 73 (0.00)  | 31 (0.19)  | 0.52 |
| 11-01 | Gp3 | g.chr11:34163869G>A  | Silent            | NAT10   | p.G953G  | N-acetyltransferase 10     | 35 (0.00)  | 25 (0.28)  | 0.75 |
| 11-01 | Gp3 | g.chr11:20066795C>A  | Silent            | NAV2    | p.R1097R | neuron navigator 2         | 105 (0.00) | 29 (0.24)  | 0.64 |
| 11-01 | Gp3 | g.chr11:20117292G>A  | Silent            | NAV2    | p.G1933G | neuron navigator 2         | 133 (0.00) | 95 (0.32)  | 0.84 |
| 11-01 | Gp3 | g.chr11:20125247C>A  | Missense Mutation | NAV2    | p.N2143K | neuron navigator 2         | 34 (0.00)  | 42 (0.29)  | 0.76 |
| 11-01 | Gp3 | g.chr2:15506719G>T   | Missense Mutation | NBAS    | p.L1268M | neuroblastoma amplifie     | 61 (0.02)  | 20 (0.25)  | 0.67 |
| 11-01 | Gp3 | g.chr2:203980755G>T  | Missense Mutation | NBEAL1  | p.D823Y  | neurobeachin-like 1        | 38 (0.00)  | 27 (0.26)  | 0.69 |
| 11-01 | Gp3 | g.chr2:203980758C>A  | Missense Mutation | NBEAL1  | p.L824M  | neurobeachin-like 1        | 39 (0.00)  | 26 (0.23)  | 0.62 |
| 11-01 | Gp3 | g.chr2:204000460T>A  | Missense Mutation | NBEAL1  | p.W1263R | neurobeachin-like 1        | 181 (0.00) | 123 (0.15) | 0.39 |
| 11-01 | Gp3 | g.chr2:204009533C>G  | Missense Mutation | NBEAL1  | p.P1658A | neurobeachin-like 1        | 36 (0.00)  | 30 (0.33)  | 0.89 |
| 11-01 | Gp3 | g.chr1:16913617C>A   | Missense Mutation | NBPF1   | p.V236F  | neuroblastoma breakpoi     | 69 (0.00)  | 32 (0.25)  | 0.67 |
| 11-01 | Gp3 | g.chr1:146401702C>T  | Silent            | NBPF12  | p.V270V  | neuroblastoma breakpoi     | 76 (0.00)  | 40 (0.30)  | 0.80 |
| 11-01 | Gp3 | g.chr1:148756484C>A  | Missense Mutation | NBPF16  | p.Q605K  |                            | 152 (0.00) | 89 (0.16)  | 0.42 |
| 11-01 | Gp3 | g.chr12:6626131T>C   | Silent            | NCAPD2  | p.D375D  | non-SMC condensin I c      | 93 (0.01)  | 75 (0.31)  | 0.82 |
| 11-01 | Gp3 | g.chr4:17814734G>C   | Missense Mutation | NCAPG   | p.Q170H  | non-SMC condensin I c      | 19 (0.00)  | 18 (0.61)  | 1.63 |
| 11-01 | Gp3 | g.chr4:17816613G>A   | Missense Mutation | NCAPG   | p.A228T  | non-SMC condensin I c      | 38 (0.00)  | 27 (0.30)  | 0.79 |
| 11-01 | Gp3 | g.chr7:158451093C>G  | Missense Mutation | NCAPG2  | p.R666P  | non-SMC condensin II c     | 21 (0.00)  | 32 (0.47)  | 1.25 |
| 11-01 | Gp3 | g.chr2:97020047G>A   | Missense Mutation | NCAPH   | p.D366N  | non-SMC condensin I c      | 79 (0.00)  | 42 (0.17)  | 0.44 |
| 11-01 | Gp3 | g.chr3:196663904C>G  | Missense Mutation | NCBP2   | p.G80A   | nuclear cap binding prot   | 49 (0.00)  | 20 (0.35)  | 0.93 |
| 11-01 | Gp3 | g.chr12:54925573C>A  | Silent            | NCKAP1L | p.L915L  | NCK-associated protein 23  | 3 (0.00)   | 16 (0.38)  | 1.00 |
| 11-01 | Gp3 | g.chr2:133541922G>T  | Missense Mutation | NCKAP5  | p.A821D  | NCK-associated protein 294 | 3 (0.00)   | 164 (0.21) | 0.57 |
| 11-01 | Gp3 | g.chr2:24980983C>A   | Missense Mutation | NCOA1   | p.S1341R | nuclear receptor coactiv   | 36 (0.00)  | 27 (0.70)  | 1.88 |
| 11-01 | Gp3 | g.chr8:71036216C>T   | Missense Mutation | NCOA2   | p.G1399D | nuclear receptor coactiv   | 28 (0.00)  | 36 (0.14)  | 0.46 |
| 11-01 | Gp3 | g.chr8:71060655G>C   | Missense Mutation | NCOA2   | p.Q820E  | nuclear receptor coactiv   | 54 (0.00)  | 42 (0.21)  | 0.71 |
| 11-01 | Gp3 | g.chr8:71068923C>G   | Missense Mutation | NCOA2   | p.M559I  | nuclear receptor coactiv   | 205 (0.00) | 151 (0.13) | 0.44 |
| 11-01 | Gp3 | g.chr20:46271050C>T  | Silent            | NCOA3   | p.H1058H | nuclear receptor coactiv   | 24 (0.00)  | 29 (0.38)  | 1.01 |
| 11-01 | Gp3 | g.chr20:44695693C>A  | Splice Site       | NCOA5   |          | nuclear receptor coactiv   | 67 (0.00)  | 38 (0.21)  | 0.56 |
| 11-01 | Gp3 | g.chr17:16022753C>T  | Missense Mutation | NCOR1   | p.M633I  | nuclear receptor corepre   | 18 (0.00)  | 26 (0.35)  | 0.92 |
| 11-01 | Gp3 | g.chr20:26094530G>C  | RNA               | NCOR1P1 |          | nuclear receptor corepre   | 129 (0.00) | 51 (0.22)  | 0.58 |
| 11-01 | Gp3 | g.chr12:124904514C>T | Missense Mutation | NCOR2   | p.G491S  | nuclear receptor corepre   | 33 (0.00)  | 24 (0.33)  | 0.89 |
| 11-01 | Gp3 | g.chr17:8351938G>A   | Missense Mutation | NDEL1   | p.E154K  | nudE neurodevelopment      | 37 (0.00)  | 27 (0.19)  | 0.49 |



|       |     |                      |                   |        |          |                           |            |           |      |
|-------|-----|----------------------|-------------------|--------|----------|---------------------------|------------|-----------|------|
| 11-01 | Gp3 | g.chr5:141511424C>A  | Missense Mutation | NDFIP1 | p.P39T   | Nedd4 family interactin   | 22 (0.00)  | 19 (0.32) | 0.84 |
| 11-01 | Gp3 | g.chr4:121957733C>A  | Missense Mutation | NDNF   | p.A465S  | neuron-derived neurotro   | 54 (0.00)  | 24 (0.25) | 0.67 |
| 11-01 | Gp3 | g.chr8:134274403G>A  | Silent            | NDRG1  | p.T71T   | N-myc downstream regu     | 22 (0.00)  | 18 (0.61) | 1.63 |
| 11-01 | Gp3 | g.chr10:75567689C>T  | Missense Mutation | NDST2  | p.S153N  | N-deacetylase/N-sulfotr   | 43 (0.00)  | 52 (0.15) | 0.41 |
| 11-01 | Gp3 | g.chr9:32572895G>A   | Missense Mutation | NDUFB6 | p.S55F   | NADH dehydrogenase (92    | 0.00)      | 32 (0.28) | 0.46 |
| 11-01 | Gp3 | g.chr11:67376968C>A  | Silent            | NDUFV1 | p.T124T  | NADH dehydrogenase (25    | 0.00)      | 26 (0.27) | 0.72 |
| 11-01 | Gp3 | g.chr2:152342351C>A  | Nonsense Mutation | NEB    | p.E8501* | nebulin                   | 103 (0.00) | 37 (0.38) | 1.01 |
| 11-01 | Gp3 | g.chr2:152359394C>G  | Missense Mutation | NEB    | p.L7947F | nebulin                   | 65 (0.00)  | 32 (0.16) | 0.42 |
| 11-01 | Gp3 | g.chr2:152363516C>A  | Missense Mutation | NEB    | p.Q7821H | nebulin                   | 15 (0.00)  | 24 (0.25) | 0.67 |
| 11-01 | Gp3 | g.chr2:152382562G>A  | Silent            | NEB    | p.V7357V | nebulin                   | 160 (0.00) | 78 (0.22) | 0.58 |
| 11-01 | Gp3 | g.chr2:152398039C>A  | Missense Mutation | NEB    | p.K6868N | nebulin                   | 111 (0.00) | 74 (0.28) | 0.76 |
| 11-01 | Gp3 | g.chr2:152404162C>T  | Missense Mutation | NEB    | p.E6750K | nebulin                   | 125 (0.00) | 40 (0.35) | 0.93 |
| 11-01 | Gp3 | g.chr2:152541424T>A  | Missense Mutation | NEB    | p.Q901H  | nebulin                   | 25 (0.00)  | 22 (0.27) | 0.73 |
| 11-01 | Gp3 | g.chr3:27326389G>A   | Missense Mutation | NEK10  | p.S618F  | NIMA-related kinase 10    | 59 (0.00)  | 45 (0.38) | 1.01 |
| 11-01 | Gp3 | g.chr1:211846988C>T  | Missense Mutation | NEK2   | p.S131N  | NIMA-related kinase 2     | 45 (0.00)  | 33 (0.15) | 0.40 |
| 11-01 | Gp3 | g.chr17:27068184C>A  | Silent            | NEK8   | p.V607V  | NIMA-related kinase 8     | 73 (0.00)  | 41 (0.29) | 0.78 |
| 11-01 | Gp3 | g.chr12:44913817C>T  | Missense Mutation | NELL2  | p.G791S  | NEL-like 2 (chicken)      | 40 (0.00)  | 26 (0.19) | 0.51 |
| 11-01 | Gp3 | g.chr12:45004650C>T  | Silent            | NELL2  | p.G516G  | NEL-like 2 (chicken)      | 86 (0.00)  | 29 (0.24) | 0.64 |
| 11-01 | Gp3 | g.chr12:45105148T>C  | Silent            | NELL2  | p.S372S  | NEL-like 2 (chicken)      | 17 (0.00)  | 26 (0.23) | 0.62 |
| 11-01 | Gp3 | g.chr15:73468803G>A  | Missense Mutation | NEO1   | p.V359I  | neogenin 1                | 21 (0.00)  | 33 (0.18) | 0.48 |
| 11-01 | Gp3 | g.chr17:7221232C>A   | Silent            | NEURL4 | p.P1360P | neuralized E3 ubiquitin   | 42 (0.00)  | 33 (0.21) | 0.57 |
| 11-01 | Gp3 | g.chr1:204931257C>G  | Missense Mutation | NFASC  | p.S237C  | neurofascin               | 56 (0.00)  | 20 (0.50) | 1.33 |
| 11-01 | Gp3 | g.chr20:50133392C>A  | Silent            | NFATC2 | p.R421R  | nuclear factor of activat | 45 (0.00)  | 17 (0.29) | 0.78 |
| 11-01 | Gp3 | g.chr19:36387840G>A  | Silent            | NFKBID | p.L43L   | nuclear factor of kappa l | 21 (0.00)  | 25 (0.20) | 0.53 |
| 11-01 | Gp3 | g.chr4:47900814G>A   | Missense Mutation | NFXL1  | p.A350V  | nuclear transcription fac | 75 (0.00)  | 88 (0.24) | 0.64 |
| 11-01 | Gp3 | g.chr12:104522241A>T | Missense Mutation | NFYB   | p.Y21N   | nuclear transcription fac | 43 (0.00)  | 51 (0.16) | 0.42 |
| 11-01 | Gp3 | g.chr1:115828974G>A  | Missense Mutation | NGF    | p.T148I  | nerve growth factor (bet  | 74 (0.00)  | 29 (0.21) | 0.55 |
| 11-01 | Gp3 | g.chr3:25778939T>A   | Missense Mutation | NGLY1  | p.N255Y  | N-glycanase 1             | 48 (0.00)  | 33 (0.15) | 0.40 |
| 11-01 | Gp3 | g.chr15:90814824C>A  | Missense Mutation | NGRN   | p.P227H  | neugrin, neurite outgrow  | 90 (0.00)  | 74 (0.22) | 0.58 |
| 11-01 | Gp3 | g.chr1:236205462C>A  | Missense Mutation | NID1   | p.D295Y  | nidogen 1                 | 16 (0.00)  | 18 (0.28) | 0.53 |
| 11-01 | Gp3 | g.chr2:201759986G>C  | Splice Site       | NIF3L1 |          | NIF3 NGG1 interacting     | 18 (0.00)  | 33 (0.21) | 0.57 |
| 11-01 | Gp3 | g.chr5:43280264C>A   | Silent            | NIM1   | p.I248I  |                           | 76 (0.00)  | 44 (0.30) | 0.79 |
| 11-01 | Gp3 | g.chr14:51208373G>A  | Missense Mutation | NIN    | p.T1792I | ninein (GSK3B interacti   | 45 (0.02)  | 55 (0.84) | 2.23 |
| 11-01 | Gp3 | g.chr14:51224859C>A  | Missense Mutation | NIN    | p.Q963H  | ninein (GSK3B interacti   | 83 (0.01)  | 92 (0.29) | 0.78 |
| 11-01 | Gp3 | g.chr14:51230655G>A  | Nonsense Mutation | NIN    | p.Q555*  | ninein (GSK3B interacti   | 30 (0.00)  | 36 (0.19) | 0.52 |

|       |     |                      |                   |         |          |                             |            |           |      |
|-------|-----|----------------------|-------------------|---------|----------|-----------------------------|------------|-----------|------|
| 11-01 | Gp3 | g.chr3:52526114C>A   | Missense Mutation | NISCH   | p.S1377R | nischarin                   | 24 (0.00)  | 36 (0.17) | 0.44 |
| 11-01 | Gp3 | g.chr12:10588569C>T  | Missense Mutation | NKG2-E  | p.G6E    |                             | 36 (0.00)  | 50 (0.22) | 0.59 |
| 11-01 | Gp3 | g.chrX:118724476G>A  | Silent            | NKRF    | p.S304S  | NFKB repressing factor      | 27 (0.00)  | 29 (0.28) | 0.46 |
| 11-01 | Gp3 | g.chr3:42687447G>A   | Missense Mutation | NKTR    | p.E1457K | natural killer cell trigger | 55 (0.00)  | 19 (0.37) | 0.98 |
| 11-01 | Gp3 | g.chr17:33463187C>T  | Splice Site       | NLE1    |          | notchless homolog 1 (D)     | 120 (0.00) | 91 (0.29) | 0.76 |
| 11-01 | Gp3 | g.chr3:173998751G>A  | Silent            | NLGN1   | p.R710R  | neuroligin 1                | 56 (0.00)  | 27 (0.22) | 0.59 |
| 11-01 | Gp3 | g.chr2:32460564C>A   | Silent            | NLRC4   | p.L896L  | NLR family, CARD dor        | 37 (0.00)  | 40 (0.30) | 0.80 |
| 11-01 | Gp3 | g.chr16:57060439C>T  | Silent            | NLRC5   | p.A528A  | NLR family, CARD dor        | 89 (0.00)  | 55 (0.15) | 0.39 |
| 11-01 | Gp3 | g.chr16:57095565C>T  | Missense Mutation | NLRC5   | p.A1369V | NLR family, CARD dor        | 15 (0.00)  | 24 (0.21) | 0.56 |
| 11-01 | Gp3 | g.chr19:56552397G>A  | Missense Mutation | NLRP5   | p.E966K  | NLR family, pyrin dom:      | 69 (0.00)  | 61 (0.46) | 1.22 |
| 11-01 | Gp3 | g.chr19:56569710G>T  | Missense Mutation | NLRP5   | p.S1135I | NLR family, pyrin dom:      | 43 (0.00)  | 35 (0.17) | 0.46 |
| 11-01 | Gp3 | g.chr19:56241249C>A  | Missense Mutation | NLRP9   | p.A648S  | NLR family, pyrin dom:      | 59 (0.02)  | 33 (0.24) | 0.65 |
| 11-01 | Gp3 | g.chr5:137451432G>C  | Missense Mutation | NME5    | p.L193V  | NME/NM23 family mer         | 38 (0.00)  | 33 (0.55) | 1.45 |
| 11-01 | Gp3 | g.chr17:43181098G>A  | Missense Mutation | NMT1    | p.D396N  | N-myristoyltransferase      | 82 (0.00)  | 40 (0.20) | 0.53 |
| 11-01 | Gp3 | g.chr2:232389810G>T  | Missense Mutation | NMUR1   | p.H409N  | neuromedin U receptor       | 18 (0.00)  | 45 (0.16) | 0.41 |
| 11-01 | Gp3 | g.chr5:43587459G>A   | RNA               | NNT-AS1 |          | NNT antisense RNA 1         | 35 (0.00)  | 37 (0.32) | 0.86 |
| 11-01 | Gp3 | g.chr7:30492478G>A   | Silent            | NOD1    | p.D185D  | nucleotide-binding oligo    | 16 (0.00)  | 37 (0.32) | 0.86 |
| 11-01 | Gp3 | g.chr2:10712249C>T   | Missense Mutation | NOL10   | p.R672H  | nucleolar protein 10        | 113 (0.00) | 45 (0.40) | 1.07 |
| 11-01 | Gp3 | g.chr2:10712278C>T   | Silent            | NOL10   | p.L662L  | nucleolar protein 10        | 79 (0.00)  | 29 (0.31) | 0.83 |
| 11-01 | Gp3 | g.chr9:33464082G>A   | Nonsense Mutation | NOL6    | p.Q953*  | nucleolar protein 6 (RN     | 116 (0.00) | 57 (0.23) | 0.61 |
| 11-01 | Gp3 | g.chr9:95062258G>A   | Silent            | NOL8    | p.V1034V | nucleolar protein 8         | 82 (0.00)  | 68 (0.51) | 1.37 |
| 11-01 | Gp3 | g.chr9:95086417G>A   | Silent            | NOL8    | p.R9R    | nucleolar protein 8         | 28 (0.00)  | 64 (0.39) | 1.04 |
| 11-01 | Gp3 | g.chr12:117681231C>A | Missense Mutation | NOS1    | p.D979Y  | nitric oxide synthase 1 (   | 62 (0.00)  | 42 (0.19) | 0.51 |
| 11-01 | Gp3 | g.chr1:120462232G>A  | Silent            | NOTCH2  | p.G1828G | notch 2                     | 21 (0.00)  | 14 (0.43) | 1.14 |
| 11-01 | Gp3 | g.chr1:120539898G>A  | Missense Mutation | NOTCH2  | p.T158I  | notch 2                     | 52 (0.00)  | 23 (0.26) | 0.70 |
| 11-01 | Gp3 | g.chr19:46443277C>T  | Silent            | NOVA2   | p.Q441Q  | neuro-oncological ventr     | 22 (0.00)  | 72 (0.18) | 0.48 |
| 11-01 | Gp3 | g.chr11:89177365T>C  | Missense Mutation | NOX4    | p.N129D  | NADPH oxidase 4             | 58 (0.00)  | 43 (0.21) | 0.56 |
| 11-01 | Gp3 | g.chr15:24922060G>A  | Missense Mutation | NPAP1   | p.G349D  | nuclear pore associated     | 46 (0.00)  | 26 (0.19) | 0.51 |
| 11-01 | Gp3 | g.chr11:66192299G>A  | Missense Mutation | NPAS4   | p.M646I  | neuronal PAS domain p       | 55 (0.00)  | 23 (0.57) | 1.51 |
| 11-01 | Gp3 | g.chr18:21123440C>A  | Nonsense Mutation | NPC1    | p.E742*  | Niemann-Pick disease, t     | 145 (0.00) | 65 (0.26) | 0.70 |
| 11-01 | Gp3 | g.chr4:72994572C>A   | Silent            | NPFFR2  | p.A88A   | neuropeptide FF recepto     | 18 (0.00)  | 14 (0.36) | 0.95 |
| 11-01 | Gp3 | g.chr18:11619753G>C  | RNA               | NPPIB1P |          | nuclear pore complex in     | 64 (0.00)  | 20 (0.35) | 0.93 |
| 11-01 | Gp3 | g.chr18:11625558G>C  | RNA               | NPPIB1P |          | nuclear pore complex in     | 106 (0.00) | 31 (0.32) | 0.86 |
| 11-01 | Gp3 | g.chr17:79534516G>C  | Missense Mutation | NPLOC4  | p.S498C  | nuclear protein localizat   | 79 (0.00)  | 55 (0.18) | 0.48 |
| 11-01 | Gp3 | g.chr7:34698162C>A   | Nonsense Mutation | NPSR1   | p.Y46*   | neuropeptide S receptor     | 32 (0.00)  | 11 (0.55) | 1.45 |

|       |     |                      |                   |         |          |                                           |            |      |
|-------|-----|----------------------|-------------------|---------|----------|-------------------------------------------|------------|------|
| 11-01 | Gp3 | g.chr4:156136234C>T  | Silent            | NPY2R   | p.V381V  | neuropeptide Y receptor 20 (0.00)         | 21 (0.29)  | 0.76 |
| 11-01 | Gp3 | g.chr16:69747024C>G  | Missense Mutation | NQO1    | p.K104N  | NAD(P)H dehydrogenase 92 (0.00)           | 80 (0.15)  | 0.40 |
| 11-01 | Gp3 | g.chr16:69752154T>A  | Nonsense Mutation | NQO1    | p.K59*   | NAD(P)H dehydrogenase 45 (0.00)           | 28 (0.29)  | 0.76 |
| 11-01 | Gp3 | g.chrX:30322813G>C   | Silent            | NR0B1   | p.T432T  | nuclear receptor subfam 48 (0.00)         | 43 (0.23)  | 0.39 |
| 11-01 | Gp3 | g.chr11:47283131G>A  | Missense Mutation | NR1H3   | p.E248K  | nuclear receptor subfam 32 (0.00)         | 48 (0.15)  | 0.39 |
| 11-01 | Gp3 | g.chr3:119531648C>A  | Missense Mutation | NR1I2   | p.S251Y  | nuclear receptor subfam 29 (0.00)         | 18 (0.33)  | 0.89 |
| 11-01 | Gp3 | g.chr12:95416032G>T  | Missense Mutation | NR2C1   | p.N595K  | nuclear receptor subfam 17 (0.00)         | 10 (0.50)  | 1.70 |
| 11-01 | Gp3 | g.chr15:96880759C>A  | Missense Mutation | NR2F2   | p.R385S  | nuclear receptor subfam 69 (0.00)         | 47 (0.17)  | 0.45 |
| 11-01 | Gp3 | g.chr10:115393896T>G | Missense Mutation | NRAP    | p.K501T  | nebulin-related anchorin 48 (0.00)        | 64 (0.28)  | 0.75 |
| 11-01 | Gp3 | g.chr5:111071185A>G  | Missense Mutation | NREP    | p.F8S    | neuronal regeneration re 80 (0.00)        | 35 (0.23)  | 0.61 |
| 11-01 | Gp3 | g.chr7:129297211C>T  | Missense Mutation | NRF1    | p.T7I    | nuclear respiratory factor 19 (0.00)      | 24 (0.38)  | 1.00 |
| 11-01 | Gp3 | g.chr2:206617671C>G  | Missense Mutation | NRP2    | p.S672R  | neuropilin 2 57 (0.00)                    | 35 (0.23)  | 0.61 |
| 11-01 | Gp3 | g.chr2:50723126T>A   | Missense Mutation | NRXN1   | p.D1036V | neurexin 1 125 (0.00)                     | 74 (0.35)  | 0.94 |
| 11-01 | Gp3 | g.chr2:50850490C>T   | Missense Mutation | NRXN1   | p.A399T  | neurexin 1 133 (0.00)                     | 104 (0.17) | 0.46 |
| 11-01 | Gp3 | g.chr5:176710891C>T  | Missense Mutation | NSD1    | p.T2038I | nuclear receptor binding 99 (0.00)        | 55 (0.16)  | 0.44 |
| 11-01 | Gp3 | g.chr17:44828925G>A  | Silent            | NSF     | p.G700G  | N-ethylmaleimide-sensitive 69 (0.00)      | 56 (0.18)  | 0.48 |
| 11-01 | Gp3 | g.chr8:59499055C>T   | Missense Mutation | NSMAF   | p.C803Y  | neutral sphingomyelinase 37 (0.00)        | 29 (0.17)  | 0.58 |
| 11-01 | Gp3 | g.chr10:104850509C>A | Missense Mutation | NT5C2   | p.M436I  | 5'-nucleotidase, cytosolic 28 (0.00)      | 19 (0.26)  | 0.70 |
| 11-01 | Gp3 | g.chr17:39987139C>A  | Missense Mutation | NT5C3B  | p.W73C   | 5'-nucleotidase, cytosolic 61 (0.00)      | 36 (0.17)  | 0.44 |
| 11-01 | Gp3 | g.chr1:233092110G>A  | Missense Mutation | NTPCR   | p.G72E   | nucleoside-triphosphatase 35 (0.00)       | 33 (0.18)  | 0.38 |
| 11-01 | Gp3 | g.chr9:87570348G>A   | Silent            | NTRK2   | p.R680R  | neurotrophic tyrosine kinase 24 (0.00)    | 29 (0.17)  | 0.46 |
| 11-01 | Gp3 | g.chr12:106464663C>A | Missense Mutation | NUAK1   | p.V241L  | NUAK family, SNF1-like 32 (0.00)          | 32 (0.16)  | 0.42 |
| 11-01 | Gp3 | g.chr13:48619932C>T  | Silent            | NUDT15  | p.L164L  | nudix (nucleoside diphosphate) 43 (0.02)  | 26 (0.42)  | 1.13 |
| 11-01 | Gp3 | g.chr10:12209716G>T  | Silent            | NUDT5   | p.P215P  | nudix (nucleoside diphosphate) 106 (0.00) | 68 (0.15)  | 0.39 |
| 11-01 | Gp3 | g.chr16:77769832C>T  | Silent            | NUDT7   | p.L99L   | nudix (nucleoside diphosphate) 57 (0.00)  | 22 (0.23)  | 0.61 |
| 11-01 | Gp3 | g.chr14:73751025G>A  | Missense Mutation | NUMB    | p.S238F  | numb homolog (Drosophila) 110 (0.00)      | 78 (0.17)  | 0.44 |
| 11-01 | Gp3 | g.chr6:17637632G>A   | Missense Mutation | NUP153  | p.A739V  | nucleoporin 153kDa 70 (0.01)              | 88 (0.32)  | 0.85 |
| 11-01 | Gp3 | g.chr6:17640220G>A   | Missense Mutation | NUP153  | p.P599L  | nucleoporin 153kDa 28 (0.00)              | 17 (0.35)  | 0.94 |
| 11-01 | Gp3 | g.chr11:47840927C>A  | Splice Site       | NUP160  | p.R454I  | nucleoporin 160kDa 102 (0.00)             | 38 (0.16)  | 0.42 |
| 11-01 | Gp3 | g.chr7:135307609G>A  | Missense Mutation | NUP205  | p.S1472N | nucleoporin 205kDa 28 (0.00)              | 12 (0.50)  | 1.33 |
| 11-01 | Gp3 | g.chr7:135327961C>T  | Missense Mutation | NUP205  | p.P1805L | nucleoporin 205kDa 70 (0.00)              | 35 (0.26)  | 0.69 |
| 11-01 | Gp3 | g.chr1:154061998G>A  | Missense Mutation | NUP210L | p.R754C  | nucleoporin 210kDa-like 54 (0.00)         | 39 (0.21)  | 0.55 |
| 11-01 | Gp3 | g.chr9:134072980G>A  | Missense Mutation | NUP214  | p.G1367S | nucleoporin 214kDa 50 (0.00)              | 25 (0.20)  | 0.53 |
| 11-01 | Gp3 | g.chrX:106397368C>G  | Missense Mutation | NUP62CL | p.Q101H  | nucleoporin 62kDa C-terminal 49 (0.00)    | 49 (0.27)  | 0.44 |
| 11-01 | Gp3 | g.chr11:3720557G>A   | Missense Mutation | NUP98   | p.T1255I | nucleoporin 98kDa 77 (0.00)               | 49 (0.31)  | 0.82 |

|       |     |                      |                   |         |          |                           |            |           |      |
|-------|-----|----------------------|-------------------|---------|----------|---------------------------|------------|-----------|------|
| 11-01 | Gp3 | g.chrX:101821737G>A  | RNA               | NXF4    |          | nuclear RNA export fac    | 36 (0.00)  | 22 (0.27) | 0.45 |
| 11-01 | Gp3 | g.chr1:228432111G>T  | Missense Mutation | OBSCN   | p.W1199L | obscurin, cytoskeletal c  | 79 (0.00)  | 41 (0.20) | 0.52 |
| 11-01 | Gp3 | g.chr1:228434246G>T  | Missense Mutation | OBSCN   | p.A1351S | obscurin, cytoskeletal c  | 90 (0.00)  | 49 (0.16) | 0.44 |
| 11-01 | Gp3 | g.chr1:228509488C>A  | Missense Mutation | OBSCN   | p.H5939Q | obscurin, cytoskeletal c  | 45 (0.00)  | 37 (0.16) | 0.43 |
| 11-01 | Gp3 | g.chr4:71063863G>A   | Missense Mutation | ODAM    | p.G122S  | odontogenic, ameloblast   | 47 (0.00)  | 23 (0.30) | 0.81 |
| 11-01 | Gp3 | g.chr9:131231556C>T  | Missense Mutation | ODF2    | p.S110L  | outer dense fiber of sper | 77 (0.00)  | 39 (0.15) | 0.41 |
| 11-01 | Gp3 | g.chr7:44715749G>A   | Splice Site       | OGDH    |          | oxoglutarate (alpha-ketc  | 19 (0.00)  | 17 (0.35) | 0.94 |
| 11-01 | Gp3 | g.chr11:7530823C>T   | Missense Mutation | OLFML1  | p.R205W  | olfactomedin-like 1       | 67 (0.00)  | 82 (0.15) | 0.39 |
| 11-01 | Gp3 | g.chr1:114522157C>T  | Missense Mutation | OLFML3  | p.L7F    | olfactomedin-like 3       | 47 (0.00)  | 36 (0.22) | 0.59 |
| 11-01 | Gp3 | g.chr1:114523915C>T  | Nonsense Mutation | OLFML3  | p.R249*  | olfactomedin-like 3       | 32 (0.00)  | 21 (0.33) | 0.89 |
| 11-01 | Gp3 | g.chr6:74078948G>A   | Silent            | OOEP    | p.H62H   | oocyte expressed protein  | 62 (0.00)  | 48 (0.19) | 0.50 |
| 11-01 | Gp3 | g.chrX:67283979G>A   | Silent            | OPHN1   | p.S625S  | oligophrenin 1            | 37 (0.00)  | 21 (0.33) | 0.56 |
| 11-01 | Gp3 | g.chrX:67413765C>A   | Missense Mutation | OPHN1   | p.V390F  | oligophrenin 1            | 20 (0.00)  | 14 (0.50) | 0.83 |
| 11-01 | Gp3 | g.chr10:13178833G>A  | Silent            | OPTN    | p.T567T  | optineurin                | 49 (0.00)  | 10 (0.80) | 2.13 |
| 11-01 | Gp3 | g.chr11:6891892C>A   | Missense Mutation | OR10A2  | p.P303T  | olfactory receptor, famil | 19 (0.00)  | 11 (0.55) | 1.45 |
| 11-01 | Gp3 | g.chr14:22038856G>A  | Missense Mutation | OR10G3  | p.T7I    | olfactory receptor, famil | 28 (0.00)  | 26 (0.19) | 0.51 |
| 11-01 | Gp3 | g.chr11:123900387G>C | Missense Mutation | OR10G8  | p.A20P   | olfactory receptor, famil | 45 (0.02)  | 32 (0.34) | 0.92 |
| 11-01 | Gp3 | g.chr11:123900946C>G | Missense Mutation | OR10G8  | p.A206G  | olfactory receptor, famil | 55 (0.00)  | 31 (0.77) | 2.06 |
| 11-01 | Gp3 | g.chr19:15904960G>T  | Missense Mutation | OR10H5  | p.M34I   | olfactory receptor, famil | 48 (0.02)  | 28 (0.43) | 1.14 |
| 11-01 | Gp3 | g.chr1:159409910C>T  | Missense Mutation | OR10J1  | p.T121I  | olfactory receptor, famil | 39 (0.00)  | 18 (0.33) | 0.89 |
| 11-01 | Gp3 | g.chr14:19377774G>T  | Missense Mutation | OR11H12 | p.A61S   | olfactory receptor, famil | 144 (0.00) | 54 (0.17) | 0.44 |
| 11-01 | Gp3 | g.chr10:45798917G>A  | Silent            | OR13A1  | p.A318A  | olfactory receptor, famil | 70 (0.00)  | 31 (0.19) | 0.52 |
| 11-01 | Gp3 | g.chr9:107367442G>T  | Missense Mutation | OR13C2  | p.S156Y  | olfactory receptor, famil | 50 (0.00)  | 41 (0.32) | 0.85 |
| 11-01 | Gp3 | g.chr9:107380165C>A  | Missense Mutation | OR13C9  | p.M107I  | olfactory receptor, famil | 138 (0.00) | 95 (0.26) | 0.70 |
| 11-01 | Gp3 | g.chr1:248512448C>T  | Silent            | OR14C36 | p.V124V  | olfactory receptor, famil | 48 (0.00)  | 30 (0.23) | 0.49 |
| 11-01 | Gp3 | g.chr17:3300829C>T   | Silent            | OR1E1   | p.L292L  | olfactory receptor, famil | 51 (0.00)  | 30 (0.27) | 0.71 |
| 11-01 | Gp3 | g.chr9:125273799C>T  | Missense Mutation | OR1J2   | p.T240I  | olfactory receptor, famil | 47 (0.00)  | 28 (0.18) | 0.48 |
| 11-01 | Gp3 | g.chr7:99474257C>G   | Missense Mutation | OR2AE1  | p.V134L  | olfactory receptor, famil | 66 (0.00)  | 38 (0.16) | 0.42 |
| 11-01 | Gp3 | g.chr11:6806593G>A   | Missense Mutation | OR2AG1  | p.G109S  | olfactory receptor, famil | 55 (0.00)  | 48 (0.15) | 0.39 |
| 11-01 | Gp3 | g.chr7:143657511G>A  | Missense Mutation | OR2F1   | p.V150I  | olfactory receptor, famil | 46 (0.00)  | 29 (0.21) | 0.55 |
| 11-01 | Gp3 | g.chr9:114090114C>G  | Silent            | OR2K2   | p.V200V  | olfactory receptor, famil | 45 (0.02)  | 40 (0.42) | 1.13 |
| 11-01 | Gp3 | g.chr1:248202418G>C  | Missense Mutation | OR2L2   | p.M283I  | olfactory receptor, famil | 40 (0.00)  | 26 (0.31) | 0.65 |
| 11-01 | Gp3 | g.chr1:248186039C>G  | Missense Mutation | OR2L5   | p.L264V  | olfactory receptor, famil | 60 (0.00)  | 64 (0.22) | 0.46 |
| 11-01 | Gp3 | g.chr5:180582488G>A  | Missense Mutation | OR2V2   | p.M182I  | olfactory receptor, famil | 77 (0.00)  | 59 (0.24) | 0.63 |
| 11-01 | Gp3 | g.chr17:3194976G>T   | Missense Mutation | OR3A1   | p.Q301K  | olfactory receptor, famil | 81 (0.00)  | 54 (0.17) | 0.44 |

|       |     |                      |                   |        |         |                                     |            |      |
|-------|-----|----------------------|-------------------|--------|---------|-------------------------------------|------------|------|
| 11-01 | Gp3 | g.chr11:51412047C>T  | Missense Mutation | OR4A5  | p.A117T | olfactory receptor, famil54 (0.00)  | 42 (0.14)  | 0.38 |
| 11-01 | Gp3 | g.chr11:50003738A>G  | Silent            | OR4C12 | p.Y100Y | olfactory receptor, famil131 (0.00) | 49 (0.14)  | 0.38 |
| 11-01 | Gp3 | g.chr11:123810725C>T | Silent            | OR4D5  | p.L134L | olfactory receptor, famil39 (0.00)  | 40 (0.35)  | 0.93 |
| 11-01 | Gp3 | g.chr15:102359080G>T | Missense Mutation | OR4F15 | p.G231C | olfactory receptor, famil81 (0.00)  | 33 (0.21)  | 0.57 |
| 11-01 | Gp3 | g.chr14:20502258G>C  | Silent            | OR4K13 | p.V220V | olfactory receptor, famil55 (0.00)  | 24 (0.46)  | 1.22 |
| 11-01 | Gp3 | g.chr14:20444103G>C  | Missense Mutation | OR4K15 | p.M142I | olfactory receptor, famil33 (0.00)  | 38 (0.50)  | 1.33 |
| 11-01 | Gp3 | g.chr14:20248542C>T  | Missense Mutation | OR4M1  | p.R21W  | olfactory receptor, famil56 (0.00)  | 56 (0.14)  | 0.38 |
| 11-01 | Gp3 | g.chr14:20248842G>A  | Missense Mutation | OR4M1  | p.D121N | olfactory receptor, famil86 (0.00)  | 79 (0.20)  | 0.54 |
| 11-01 | Gp3 | g.chr11:4976408G>T   | Missense Mutation | OR51A2 | p.S179Y | olfactory receptor, famil48 (0.00)  | 27 (0.30)  | 0.79 |
| 11-01 | Gp3 | g.chr11:5373439G>A   | Silent            | OR51B6 | p.K234K | olfactory receptor, famil40 (0.00)  | 11 (0.55)  | 1.45 |
| 11-01 | Gp3 | g.chr11:4842809G>C   | Missense Mutation | OR51F2 | p.C65S  | olfactory receptor, famil140 (0.01) | 150 (0.17) | 0.44 |
| 11-01 | Gp3 | g.chr11:4843533C>T   | Silent            | OR51F2 | p.Y306Y | olfactory receptor, famil32 (0.00)  | 53 (0.25)  | 0.65 |
| 11-01 | Gp3 | g.chr11:4843587G>A   | Silent            | OR51F2 | p.K324K | olfactory receptor, famil29 (0.00)  | 44 (0.18)  | 0.48 |
| 11-01 | Gp3 | g.chr11:5475624C>G   | Silent            | OR51I2 | p.A302A | olfactory receptor, famil90 (0.00)  | 47 (0.15)  | 0.40 |
| 11-01 | Gp3 | g.chr11:5411194C>T   | Missense Mutation | OR51M1 | p.S189L | olfactory receptor, famil60 (0.00)  | 22 (0.59)  | 1.58 |
| 11-01 | Gp3 | g.chr11:5443536C>T   | Missense Mutation | OR51Q1 | p.L36F  | olfactory receptor, famil30 (0.00)  | 11 (0.55)  | 1.45 |
| 11-01 | Gp3 | g.chr11:5878701C>T   | Missense Mutation | OR52E8 | p.G78S  | olfactory receptor, famil148 (0.00) | 94 (0.21)  | 0.57 |
| 11-01 | Gp3 | g.chr11:4615953G>A   | Missense Mutation | OR52I1 | p.V229I | olfactory receptor, famil206 (0.00) | 153 (0.16) | 0.42 |
| 11-01 | Gp3 | g.chr11:4825601C>A   | Missense Mutation | OR52R1 | p.A4S   | olfactory receptor, famil57 (0.00)  | 19 (0.42)  | 1.12 |
| 11-01 | Gp3 | g.chr11:5968864C>T   | Silent            | OR56A3 | p.I96I  | olfactory receptor, famil61 (0.00)  | 80 (0.17)  | 0.47 |
| 11-01 | Gp3 | g.chr3:97806113T>C   | Missense Mutation | OR5AC2 | p.F33L  | olfactory receptor, famil73 (0.01)  | 64 (0.19)  | 0.50 |
| 11-01 | Gp3 | g.chr11:58126529G>A  | Missense Mutation | OR5B17 | p.T5I   | olfactory receptor, famil32 (0.00)  | 31 (0.23)  | 0.60 |
| 11-01 | Gp3 | g.chr3:98216621G>A   | Missense Mutation | OR5K2  | p.A33T  | olfactory receptor, famil148 (0.01) | 64 (0.22)  | 0.58 |
| 11-01 | Gp3 | g.chr11:56230787C>T  | Missense Mutation | OR5M9  | p.A31T  | olfactory receptor, famil47 (0.00)  | 37 (0.19)  | 0.50 |
| 11-01 | Gp3 | g.chr11:56230814G>A  | Nonsense Mutation | OR5M9  | p.Q22*  | olfactory receptor, famil33 (0.00)  | 23 (0.39)  | 1.04 |
| 11-01 | Gp3 | g.chr11:55681354G>A  | Silent            | OR5W2  | p.F235F | olfactory receptor, famil56 (0.00)  | 30 (0.23)  | 0.62 |
| 11-01 | Gp3 | g.chr12:55688902C>A  | Missense Mutation | OR6C6  | p.G39W  | olfactory receptor, famil16 (0.00)  | 15 (0.33)  | 0.89 |
| 11-01 | Gp3 | g.chr14:23103244G>A  | Missense Mutation | OR6J1  | p.P158L | olfactory receptor, famil45 (0.00)  | 36 (0.17)  | 0.44 |
| 11-01 | Gp3 | g.chr1:158747006G>A  | Silent            | OR6N2  | p.L140L | olfactory receptor, famil76 (0.00)  | 22 (0.27)  | 0.73 |
| 11-01 | Gp3 | g.chr14:21109275G>A  | Silent            | OR6S1  | p.C192C | olfactory receptor, famil34 (0.00)  | 25 (0.32)  | 0.85 |
| 11-01 | Gp3 | g.chr7:142750079C>T  | Silent            | OR6V1  | p.I214I | olfactory receptor, famil143 (0.00) | 88 (0.17)  | 0.45 |
| 11-01 | Gp3 | g.chr7:142760352G>A  | RNA               | OR6W1P |         | olfactory receptor, famil48 (0.00)  | 29 (0.17)  | 0.46 |
| 11-01 | Gp3 | g.chr19:14910043C>T  | Silent            | OR7C1  | p.G302G | olfactory receptor, famil42 (0.00)  | 26 (0.19)  | 0.51 |
| 11-01 | Gp3 | g.chr11:124440109C>T | Missense Mutation | OR8A1  | p.L49F  | olfactory receptor, famil36 (0.00)  | 27 (0.30)  | 0.79 |
| 11-01 | Gp3 | g.chr11:124412651C>A | Silent            | OR8B12 | p.L300L | olfactory receptor, famil33 (0.00)  | 18 (0.33)  | 0.89 |

|       |     |                      |                   |          |          |                                      |            |      |
|-------|-----|----------------------|-------------------|----------|----------|--------------------------------------|------------|------|
| 11-01 | Gp3 | g.chr11:124310170C>T | Missense Mutation | OR8B8    | p.G271D  | olfactory receptor, famil45 (0.00)   | 28 (0.18)  | 0.48 |
| 11-01 | Gp3 | g.chr11:124310500G>A | Missense Mutation | OR8B8    | p.A161V  | olfactory receptor, famil61 (0.00)   | 42 (0.14)  | 0.38 |
| 11-01 | Gp3 | g.chr11:124120953T>A | RNA               | OR8G1    |          | olfactory receptor, famil111 (0.00)  | 65 (0.28)  | 0.74 |
| 11-01 | Gp3 | g.chr11:55890374C>A  | Missense Mutation | OR8H3    | p.H176N  | olfactory receptor, famil54 (0.00)   | 40 (0.15)  | 0.40 |
| 11-01 | Gp3 | g.chr11:56086095C>A  | Missense Mutation | OR8K3    | p.L105I  | olfactory receptor, famil60 (0.00)   | 28 (0.32)  | 0.86 |
| 11-01 | Gp3 | g.chr12:48919467C>G  | Missense Mutation | OR8S1    | p.S18C   | olfactory receptor, famil49 (0.00)   | 24 (0.33)  | 0.89 |
| 11-01 | Gp3 | g.chr11:56143408C>T  | Silent            | OR8U1    | p.C103C  | olfactory receptor, famil139 (0.00)  | 42 (0.19)  | 0.51 |
| 11-01 | Gp3 | g.chr12:55523599C>G  | Missense Mutation | OR9K2    | p.A16G   | olfactory receptor, famil71 (0.00)   | 26 (0.27)  | 0.72 |
| 11-01 | Gp3 | g.chr2:201785027T>A  | Missense Mutation | ORC2     | p.N462Y  | origin recognition comp 30 (0.00)    | 31 (0.42)  | 1.12 |
| 11-01 | Gp3 | g.chr2:201822820G>A  | Silent            | ORC2     | p.D9D    | origin recognition comp 23 (0.00)    | 28 (0.32)  | 0.86 |
| 11-01 | Gp3 | g.chr16:46725021C>A  | Missense Mutation | ORC6     | p.P62T   | origin recognition comp 48 (0.00)    | 34 (0.21)  | 0.55 |
| 11-01 | Gp3 | g.chr11:59349024G>A  | Missense Mutation | OSBP     | p.T561I  | oxysterol binding protei 31 (0.00)   | 18 (0.44)  | 1.19 |
| 11-01 | Gp3 | g.chr11:59349028C>G  | Splice Site       | OSBP     |          | oxysterol binding protei 17 (0.00)   | 16 (0.50)  | 1.33 |
| 11-01 | Gp3 | g.chr3:125279339C>G  | Missense Mutation | OSBPL11  | p.D347H  | oxysterol binding protei 30 (0.00)   | 28 (0.39)  | 1.05 |
| 11-01 | Gp3 | g.chr18:21750351C>G  | Silent            | OSBPL1A  | p.T786T  | oxysterol binding protei 97 (0.01)   | 48 (0.17)  | 0.44 |
| 11-01 | Gp3 | g.chr7:24843989C>A   | Nonsense Mutation | OSBPL3   | p.E838*  | oxysterol binding protei 104 (0.00)  | 113 (0.18) | 0.47 |
| 11-01 | Gp3 | g.chr7:24882020C>G   | Missense Mutation | OSBPL3   | p.D427H  | oxysterol binding protei 37 (0.00)   | 35 (0.34)  | 0.91 |
| 11-01 | Gp3 | g.chr2:179197461G>A  | Missense Mutation | OSBPL6   | p.E156K  | oxysterol binding protei 42 (0.00)   | 18 (0.28)  | 0.74 |
| 11-01 | Gp3 | g.chr14:20916149G>A  | Missense Mutation | OSGEP    | p.T236I  | O-sialoglycoprotein end 78 (0.00)    | 33 (0.42)  | 1.13 |
| 11-01 | Gp3 | g.chr8:90937598G>A   | Silent            | OSGIN2   | p.E496E  | oxidative stress induced 117 (0.01)  | 107 (0.21) | 0.69 |
| 11-01 | Gp3 | g.chr6:159262696C>A  | RNA               | OSTCP1   |          | oligosaccharyltransferas 33 (0.00)   | 22 (0.23)  | 0.61 |
| 11-01 | Gp3 | g.chr16:21689926G>A  | Splice Site       | OTOA     | p.D31N   | otoanchorin 45 (0.00)                | 56 (0.25)  | 0.67 |
| 11-01 | Gp3 | g.chr16:21716536G>T  | Missense Mutation | OTOA     | p.A343S  | otoanchorin 48 (0.00)                | 40 (0.17)  | 0.47 |
| 11-01 | Gp3 | g.chr12:80747224G>T  | Missense Mutation | OTOGL    | p.V1822L | otogelin-like 63 (0.00)              | 45 (0.20)  | 0.53 |
| 11-01 | Gp3 | g.chr20:16729070C>A  | Missense Mutation | OTOR     | p.F8L    | otoraplin 195 (0.00)                 | 125 (0.15) | 0.41 |
| 11-01 | Gp3 | g.chr4:146058825C>A  | Missense Mutation | OTUD4    | p.L1034F | OTU deubiquitinase 4 117 (0.00)      | 58 (0.22)  | 0.60 |
| 11-01 | Gp3 | g.chr4:146065514C>T  | Missense Mutation | OTUD4    | p.D499N  | OTU deubiquitinase 4 124 (0.01)      | 42 (0.17)  | 0.44 |
| 11-01 | Gp3 | g.chr4:146083793C>A  | Splice Site       | OTUD4    | p.Q165H  | OTU deubiquitinase 4 19 (0.00)       | 13 (0.54)  | 1.44 |
| 11-01 | Gp3 | g.chr14:57507914G>A  | RNA               | OTX2-AS1 |          | OTX2 antisense RNA 1 80 (0.01)       | 59 (0.31)  | 0.81 |
| 11-01 | Gp3 | g.chr12:29644126C>A  | Splice Site       | OVCH1    |          | ovochoymase 1 51 (0.00)              | 30 (0.37)  | 0.98 |
| 11-01 | Gp3 | g.chr1:111957416C>A  | Silent            | OVGP1    | p.V569V  | oviductal glycoprotein 124 (0.00)    | 13 (0.54)  | 1.44 |
| 11-01 | Gp3 | g.chr5:41840601C>A   | Missense Mutation | OXCT1    | p.R228S  | 3-oxoacid CoA transferæ 67 (0.00)    | 35 (0.20)  | 0.53 |
| 11-01 | Gp3 | g.chr3:25833080G>C   | Missense Mutation | OXSM     | p.G190A  | 3-oxoacyl-ACP synthasæ 71 (0.00)     | 46 (0.24)  | 0.64 |
| 11-01 | Gp3 | g.chr3:38278418G>A   | Missense Mutation | OXSRI    | p.S347N  | oxidative stress responsi 201 (0.00) | 127 (0.16) | 0.42 |
| 11-01 | Gp3 | g.chr3:38278449C>A   | Silent            | OXSRI    | p.L357L  | oxidative stress responsi 183 (0.00) | 123 (0.16) | 0.43 |

|       |     |                      |                   |             |          |                           |              |            |      |
|-------|-----|----------------------|-------------------|-------------|----------|---------------------------|--------------|------------|------|
| 11-01 | Gp3 | g.chr12:121570878G>C | Silent            | P2RX7       | p.V35V   | purinergic receptor P2X 7 | 79 (0.00)    | 45 (0.29)  | 0.77 |
| 11-01 | Gp3 | g.chr12:121622149G>C | Silent            | P2RX7       | p.L444L  | purinergic receptor P2X 6 | 60 (0.00)    | 22 (0.36)  | 0.97 |
| 11-01 | Gp3 | g.chr3:49039020C>T   | Silent            | P4HTM       | p.L196L  | prolyl 4-hydroxylase, tr  | 27 (0.00)    | 24 (0.54)  | 1.44 |
| 11-01 | Gp3 | g.chr12:56500780C>T  | Missense Mutation | PA2G4       | p.A75V   | proliferation-associated  | 31 (0.00)    | 33 (0.27)  | 0.73 |
| 11-01 | Gp3 | g.chr8:101730445C>A  | Missense Mutation | PABPC1      | p.W86L   | poly(A) binding protein   | 40 (0.00)    | 31 (0.26)  | 0.69 |
| 11-01 | Gp3 | g.chr11:66001701C>A  | Missense Mutation | PACS1       | p.P698T  | phosphofurin acidic clu   | 57 (0.00)    | 73 (0.23)  | 0.62 |
| 11-01 | Gp3 | g.chr11:47201128G>C  | Missense Mutation | PACSN3      | p.Q205E  | protein kinase C and cas  | 34 (0.00)    | 29 (0.24)  | 0.64 |
| 11-01 | Gp3 | g.chr1:17548940C>A   | Missense Mutation | PADI1       | p.A83D   | peptidyl arginine deim    | 99 (0.00)    | 55 (0.35)  | 0.92 |
| 11-01 | Gp3 | g.chr1:17681042C>A   | Silent            | PADI4       | p.G390G  | peptidyl arginine deim    | 44 (0.02)    | 17 (0.47)  | 1.25 |
| 11-01 | Gp3 | g.chrX:55247880C>T   | Missense Mutation | PAGE5       | p.P42L   | P antigen family, memb    | 18 (0.00)    | 23 (0.26)  | 0.43 |
| 11-01 | Gp3 | g.chr4:169433328G>A  | Missense Mutation | PALLD       | p.E225K  | palladin, cytoskeletal    | as:91 (0.00) | 45 (0.24)  | 0.65 |
| 11-01 | Gp3 | g.chr4:169630213C>A  | Missense Mutation | PALLD       | p.F512L  | palladin, cytoskeletal    | as:69 (0.00) | 30 (0.60)  | 1.60 |
| 11-01 | Gp3 | g.chr9:112899172G>A  | Missense Mutation | PALM2-AKAP1 | p.E450K  | PALM2-AKAP2 readth        | 74 (0.01)    | 42 (0.24)  | 0.63 |
| 11-01 | Gp3 | g.chr12:56718365C>A  | Splice Site       | PAN2        | p.Q576H  | PAN2 poly(A) specific     | 150 (0.00)   | 68 (0.24)  | 0.63 |
| 11-01 | Gp3 | g.chr11:93911705C>T  | Silent            | PANX1       | p.D164D  | pannexin 1                | 47 (0.00)    | 37 (0.22)  | 0.58 |
| 11-01 | Gp3 | g.chr11:124489539G>A | Missense Mutation | PANX3       | p.R296Q  | pannexin 3                | 47 (0.00)    | 38 (0.76)  | 2.04 |
| 11-01 | Gp3 | g.chr2:61007904G>A   | Nonsense Mutation | PAPOLG      | p.W299*  | poly(A) polymerase gan    | 93 (0.00)    | 78 (0.24)  | 0.65 |
| 11-01 | Gp3 | g.chr1:176668247G>T  | Missense Mutation | PAPPA2      | p.V920L  | pappalysin 2              | 102 (0.00)   | 51 (0.22)  | 0.58 |
| 11-01 | Gp3 | g.chr15:69682044C>A  | Missense Mutation | PAQR5       | p.T146N  | progesterin and adipoQ    | re 29 (0.00) | 22 (0.36)  | 0.97 |
| 11-01 | Gp3 | g.chr10:34666954G>T  | Missense Mutation | PARD3       | p.L494I  | par-3 family cell polarit | 83 (0.00)    | 50 (0.16)  | 0.43 |
| 11-01 | Gp3 | g.chr12:3939135T>C   | Missense Mutation | PARP11      | p.E23G   | poly (ADP-ribose) poly    | 170 (0.00)   | 43 (0.16)  | 0.43 |
| 11-01 | Gp3 | g.chr3:122419680T>A  | Missense Mutation | PARP14      | p.F760Y  | poly (ADP-ribose) poly    | 163 (0.00)   | 42 (0.14)  | 0.38 |
| 11-01 | Gp3 | g.chr15:72552956G>A  | Missense Mutation | PARP6       | p.R207C  | poly (ADP-ribose) poly    | 189 (0.01)   | 102 (0.23) | 0.60 |
| 11-01 | Gp3 | g.chr3:122274497C>T  | Missense Mutation | PARP9       | p.C209Y  | poly (ADP-ribose) poly    | 130 (0.00)   | 32 (0.16)  | 0.42 |
| 11-01 | Gp3 | g.chr11:12495499G>T  | Missense Mutation | PARVA       | p.R129L  | parvin, alpha             | 32 (0.00)    | 18 (0.39)  | 1.04 |
| 11-01 | Gp3 | g.chr2:242065820G>A  | Missense Mutation | PASK        | p.A837V  | PAS domain containing     | 28 (0.00)    | 17 (0.29)  | 0.78 |
| 11-01 | Gp3 | g.chr11:125616249G>A | Missense Mutation | PATE1       | p.R17K   | prostate and testis expe  | 32 (0.00)    | 20 (0.25)  | 0.67 |
| 11-01 | Gp3 | g.chr2:223086025C>G  | Missense Mutation | PAX3        | p.G291R  | paired box 3              | 167 (0.00)   | 70 (0.17)  | 0.46 |
| 11-01 | Gp3 | g.chr21:47333867C>A  | Silent            | PCBP3       | p.S169S  | poly(rC) binding protei   | 28 (0.00)    | 57 (0.21)  | 0.56 |
| 11-01 | Gp3 | g.chr3:51992976C>T   | Splice Site       | PCBP4       |          | poly(rC) binding protei   | 35 (0.00)    | 44 (0.18)  | 0.48 |
| 11-01 | Gp3 | g.chr13:100953746C>T | Silent            | PCCA        | p.G366G  | propionyl CoA carboxyl    | 54 (0.00)    | 42 (0.24)  | 0.63 |
| 11-01 | Gp3 | g.chr10:55570354C>T  | Missense Mutation | PCDH15      | p.V1489M | protocadherin-related     | 1564 (0.00)  | 47 (0.28)  | 0.74 |
| 11-01 | Gp3 | g.chr5:140166721C>T  | Silent            | PCDHA1      | p.D282D  | protocadherin alpha 1     | 66 (0.00)    | 48 (0.15)  | 0.39 |
| 11-01 | Gp3 | g.chr5:140167076T>C  | Missense Mutation | PCDHA1      | p.F401L  | protocadherin alpha 1     | 46 (0.00)    | 65 (0.17)  | 0.45 |
| 11-01 | Gp3 | g.chr5:140167078C>T  | Silent            | PCDHA1      | p.F401F  | protocadherin alpha 1     | 46 (0.00)    | 65 (0.20)  | 0.53 |

|       |     |                     |                   |          |          |                            |            |            |      |
|-------|-----|---------------------|-------------------|----------|----------|----------------------------|------------|------------|------|
| 11-01 | Gp3 | g.chr5:140236058C>A | Missense Mutation | PCDHA10  | p.P142H  | protocadherin alpha 10     | 58 (0.00)  | 35 (0.20)  | 0.53 |
| 11-01 | Gp3 | g.chr5:140250862C>T | Missense Mutation | PCDHA11  | p.T725M  | protocadherin alpha 11     | 23 (0.00)  | 27 (0.30)  | 0.79 |
| 11-01 | Gp3 | g.chr5:140257295G>A | Silent            | PCDHA12  | p.G746G  | protocadherin alpha 12     | 35 (0.00)  | 47 (0.23)  | 0.62 |
| 11-01 | Gp3 | g.chr5:140262082G>A | Missense Mutation | PCDHA13  | p.V77I   | protocadherin alpha 13     | 115 (0.00) | 59 (0.29)  | 0.77 |
| 11-01 | Gp3 | g.chr5:140221424G>A | Missense Mutation | PCDHA8   | p.S173N  | protocadherin alpha 8      | 25 (0.00)  | 35 (0.20)  | 0.53 |
| 11-01 | Gp3 | g.chr5:140580774C>A | Missense Mutation | PCDHB11  | p.T476K  | protocadherin beta 11      | 18 (0.00)  | 63 (0.89)  | 2.37 |
| 11-01 | Gp3 | g.chr5:140589224G>A | Missense Mutation | PCDHB12  | p.V249M  | protocadherin beta 12      | 19 (0.00)  | 27 (0.30)  | 0.79 |
| 11-01 | Gp3 | g.chr5:140480606G>A | Missense Mutation | PCDHB3   | p.D125N  | protocadherin beta 3       | 119 (0.00) | 44 (0.20)  | 0.55 |
| 11-01 | Gp3 | g.chr5:140515474C>A | Missense Mutation | PCDHB5   | p.P153H  | protocadherin beta 5       | 81 (0.00)  | 63 (0.16)  | 0.42 |
| 11-01 | Gp3 | g.chr5:140531224C>A | Missense Mutation | PCDHB6   | p.N462K  | protocadherin beta 6       | 22 (0.00)  | 23 (0.22)  | 0.58 |
| 11-01 | Gp3 | g.chr5:140885008C>A | Missense Mutation | PCDHGA12 | p.D844E  | protocadherin gamma st 87  | 87 (0.00)  | 49 (0.16)  | 0.44 |
| 11-01 | Gp3 | g.chr5:140724944C>G | Missense Mutation | PCDHGA3  | p.N448K  | protocadherin gamma st 36  | 36 (0.00)  | 39 (0.62)  | 1.64 |
| 11-01 | Gp3 | g.chr5:140725588C>A | Missense Mutation | PCDHGA3  | p.A663D  | protocadherin gamma st 15  | 15 (0.00)  | 34 (0.18)  | 0.47 |
| 11-01 | Gp3 | g.chr5:140735293G>A | Missense Mutation | PCDHGA4  | p.G176S  | protocadherin gamma st 64  | 64 (0.02)  | 27 (0.22)  | 0.59 |
| 11-01 | Gp3 | g.chr5:140764086G>C | Silent            | PCDHGA7  | p.P540P  | protocadherin gamma st 42  | 42 (0.00)  | 22 (0.32)  | 0.85 |
| 11-01 | Gp3 | g.chr5:140752278G>A | Missense Mutation | PCDHGB3  | p.E773K  | protocadherin gamma st 48  | 48 (0.02)  | 19 (0.37)  | 0.98 |
| 11-01 | Gp3 | g.chr5:140866367C>A | Missense Mutation | PCDHGC4  | p.P543T  | protocadherin gamma st 72  | 72 (0.00)  | 44 (0.18)  | 0.48 |
| 11-01 | Gp3 | g.chr11:82876652T>A | Missense Mutation | PCF11    | p.L238H  | PCF11 cleavage and pol     | 119 (0.00) | 56 (0.14)  | 0.38 |
| 11-01 | Gp3 | g.chr17:36894833C>A | Missense Mutation | PCGF2    | p.K147N  | polycomb group ring fin    | 26 (0.00)  | 21 (0.29)  | 0.76 |
| 11-01 | Gp3 | g.chr7:82582498T>C  | Missense Mutation | PCLO     | p.T2591A | piccolo presynaptic cyto   | 91 (0.01)  | 38 (0.24)  | 0.63 |
| 11-01 | Gp3 | g.chr7:82595686G>A  | Missense Mutation | PCLO     | p.P1140S | piccolo presynaptic cyto   | 183 (0.00) | 69 (0.17)  | 0.46 |
| 11-01 | Gp3 | g.chr7:82785092C>A  | Missense Mutation | PCLO     | p.V289L  | piccolo presynaptic cyto   | 58 (0.00)  | 49 (0.24)  | 0.65 |
| 11-01 | Gp3 | g.chr8:17810531G>T  | Missense Mutation | PCM1     | p.R375M  | pericentriolar material    | 145 (0.00) | 14 (0.43)  | 0.64 |
| 11-01 | Gp3 | g.chr6:150094279C>A | Missense Mutation | PCMT1    | p.Q114K  | protein-L-isoaspartate     | 142 (0.00) | 15 (0.40)  | 1.07 |
| 11-01 | Gp3 | g.chr14:60591309C>A | Missense Mutation | PCNXL4   | p.P807Q  | pecanex-like 4 (Drosopl    | 149 (0.00) | 59 (0.34)  | 0.90 |
| 11-01 | Gp3 | g.chr1:161254226C>A | Silent            | PCP4L1   | p.G54G   | Purkinje cell protein 4 li | 52 (0.00)  | 35 (0.14)  | 0.38 |
| 11-01 | Gp3 | g.chr5:95730615C>T  | Missense Mutation | PCSK1    | p.V613I  | proprotein convertase st   | 132 (0.00) | 98 (0.17)  | 0.46 |
| 11-01 | Gp3 | g.chr5:95746652C>T  | Silent            | PCSK1    | p.S307S  | proprotein convertase st   | 26 (0.00)  | 24 (0.62)  | 1.67 |
| 11-01 | Gp3 | g.chr20:17417373C>T | Missense Mutation | PCSK2    | p.P244S  | proprotein convertase st   | 68 (0.00)  | 56 (0.21)  | 0.57 |
| 11-01 | Gp3 | g.chr9:78686696G>T  | Missense Mutation | PCSK5    | p.S259I  | proprotein convertase st   | 100 (0.01) | 50 (0.12)  | 0.39 |
| 11-01 | Gp3 | g.chr9:78925616G>T  | Missense Mutation | PCSK5    | p.G1218C | proprotein convertase st   | 37 (0.00)  | 28 (0.29)  | 0.94 |
| 11-01 | Gp3 | g.chr9:78947464C>T  | Silent            | PCSK5    | p.C1535C | proprotein convertase st   | 40 (0.00)  | 47 (0.36)  | 1.18 |
| 11-01 | Gp3 | g.chr12:54966415G>A | Missense Mutation | PDE1B    | p.D168N  | phosphodiesterase 1B, c    | 246 (0.00) | 121 (0.21) | 0.57 |
| 11-01 | Gp3 | g.chr12:54970365C>T | Missense Mutation | PDE1B    | p.R422C  | phosphodiesterase 1B, c    | 15 (0.00)  | 20 (0.35)  | 0.93 |
| 11-01 | Gp3 | g.chr11:14808054G>T | Silent            | PDE3B    | p.L367L  | phosphodiesterase 3B, c    | 120 (0.00) | 38 (0.16)  | 0.42 |



|       |     |                      |                   |         |          |                                    |           |      |
|-------|-----|----------------------|-------------------|---------|----------|------------------------------------|-----------|------|
| 11-01 | Gp3 | g.chr11:14889171C>A  | Silent            | PDE3B   | p.S951S  | phosphodiesterase 3B, c 19 (0.00)  | 11 (0.45) | 1.21 |
| 11-01 | Gp3 | g.chr1:66384404C>T   | Missense Mutation | PDE4B   | p.S56F   | phosphodiesterase 4B, c 23 (0.00)  | 15 (0.47) | 1.24 |
| 11-01 | Gp3 | g.chr1:144918838G>C  | Missense Mutation | PDE4DIP | p.L587V  | phosphodiesterase 4D ir 75 (0.00)  | 54 (0.19) | 0.49 |
| 11-01 | Gp3 | g.chr5:149274832A>G  | Missense Mutation | PDE6A   | p.S548P  | phosphodiesterase 6A, c 34 (0.03)  | 35 (0.14) | 0.38 |
| 11-01 | Gp3 | g.chr10:95400236G>T  | Missense Mutation | PDE6C   | p.R553S  | phosphodiesterase 6C, c 44 (0.00)  | 29 (0.34) | 0.92 |
| 11-01 | Gp3 | g.chr15:85661014C>T  | Missense Mutation | PDE8A   | p.H560Y  | phosphodiesterase 8A 53 (0.00)     | 70 (0.19) | 0.50 |
| 11-01 | Gp3 | g.chr21:44108103C>A  | Splice Site       | PDE9A   | p.R73S   | phosphodiesterase 9A 21 (0.00)     | 18 (0.33) | 0.89 |
| 11-01 | Gp3 | g.chr7:540877C>A     | Silent            | PDGFA   | p.V152V  | platelet-derived growth 71 (0.00)  | 48 (0.19) | 0.50 |
| 11-01 | Gp3 | g.chr5:149497194G>T  | Missense Mutation | PDGFRB  | p.P1042T | platelet-derived growth 21 (0.00)  | 28 (0.21) | 0.57 |
| 11-01 | Gp3 | g.chr3:122865032G>A  | Silent            | PDIA5   | p.K356K  | protein disulfide isomer:80 (0.00) | 56 (0.16) | 0.43 |
| 11-01 | Gp3 | g.chr13:33344486G>A  | Silent            | PDS5B   | p.P1284P | PDS5, regulator of cohe 96 (0.00)  | 98 (0.15) | 0.41 |
| 11-01 | Gp3 | g.chr10:27013023G>A  | Missense Mutation | PDSS1   | p.A268T  | prenyl (decaprenyl) dipt 81 (0.00) | 64 (0.22) | 0.58 |
| 11-01 | Gp3 | g.chr16:70065868C>T  | RNA               | PDXDC2P |          | pyridoxal-dependent de 40 (0.00)   | 57 (0.56) | 1.50 |
| 11-01 | Gp3 | g.chr21:45168938C>T  | Silent            | PDXK    | p.I147I  | pyridoxal (pyridoxine, v 21 (0.00) | 24 (0.29) | 0.78 |
| 11-01 | Gp3 | g.chr20:1961185G>T   | Silent            | PDYN    | p.P183P  | prodynorphin 59 (0.00)             | 51 (0.25) | 0.68 |
| 11-01 | Gp3 | g.chr20:1961186G>T   | Missense Mutation | PDYN    | p.P183H  | prodynorphin 60 (0.00)             | 52 (0.25) | 0.67 |
| 11-01 | Gp3 | g.chr10:119042887G>C | Nonsense Mutation | PDZD8   | p.Y1119* | PDZ domain containing 56 (0.00)    | 22 (0.27) | 0.73 |
| 11-01 | Gp3 | g.chr1:145748375C>T  | Missense Mutation | PDZK1   | p.T83I   | PDZ domain containing 27 (0.00)    | 9 (0.56)  | 1.48 |
| 11-01 | Gp3 | g.chr1:145931877C>T  | RNA               | PDZK1P1 |          | PDZ domain containing 142 (0.00)   | 30 (0.53) | 1.42 |
| 11-01 | Gp3 | g.chr15:77473505C>T  | Missense Mutation | PEAK1   | p.S255N  | pseudopodium-enriched 65 (0.00)    | 42 (0.21) | 0.57 |
| 11-01 | Gp3 | g.chr2:64322385A>G   | Silent            | PELI1   | p.N236N  | pellino E3 ubiquitin pro 41 (0.00) | 17 (0.41) | 1.10 |
| 11-01 | Gp3 | g.chr11:66239924G>A  | Missense Mutation | PELI3   | p.D123N  | pellino E3 ubiquitin pro 23 (0.00) | 16 (0.50) | 1.33 |
| 11-01 | Gp3 | g.chr17:17412827C>A  | Missense Mutation | PEMT    | p.V130L  | phosphatidylethanolami 26 (0.00)   | 22 (0.27) | 0.73 |
| 11-01 | Gp3 | g.chr8:57354154G>A   | Silent            | PENK    | p.L161L  | proenkephalin 48 (0.00)            | 24 (0.38) | 1.25 |
| 11-01 | Gp3 | g.chr8:57354299C>A   | Missense Mutation | PENK    | p.K112N  | proenkephalin 63 (0.00)            | 39 (0.13) | 0.43 |
| 11-01 | Gp3 | g.chr17:8049957G>T   | Missense Mutation | PER1    | p.S621Y  | period circadian clock 1 33 (0.00) | 38 (0.16) | 0.42 |
| 11-01 | Gp3 | g.chr22:30974829G>T  | Silent            | PES1    | p.R421R  | pescadillo ribosomal bic 63 (0.00) | 27 (0.26) | 0.41 |
| 11-01 | Gp3 | g.chr1:145517388C>A  | Splice Site       | PEX11B  | p.L58I   | peroxisomal biogenesis 37 (0.00)   | 24 (0.21) | 0.56 |
| 11-01 | Gp3 | g.chr17:33904507C>G  | Missense Mutation | PEX12   | p.R77T   | peroxisomal biogenesis 118 (0.00)  | 69 (0.16) | 0.43 |
| 11-01 | Gp3 | g.chr12:7355232C>A   | Missense Mutation | PEX5    | p.Q260K  | peroxisomal biogenesis 67 (0.00)   | 72 (0.18) | 0.48 |
| 11-01 | Gp3 | g.chr17:8168914C>T   | Silent            | PFAS    | p.I834I  | phosphoribosylformylgl 32 (0.00)   | 31 (0.26) | 0.69 |
| 11-01 | Gp3 | g.chr3:48587606G>A   | Silent            | PFKFB4  | p.T53T   | 6-phosphofructo-2-kina 24 (0.00)   | 24 (0.21) | 0.56 |
| 11-01 | Gp3 | g.chr6:28254916G>A   | Missense Mutation | PGBD1   | p.V205M  | piggyBac transposable e 71 (0.00)  | 45 (0.40) | 1.07 |
| 11-01 | Gp3 | g.chr6:49754785C>A   | Missense Mutation | PGK2    | p.R39M   | phosphoglycerate kinas 19 (0.00)   | 14 (0.57) | 1.52 |
| 11-01 | Gp3 | g.chr19:15586684G>A  | Missense Mutation | PGLYRP2 | p.S266F  | peptidoglycan recogniti 21 (0.00)  | 27 (0.19) | 0.49 |

|       |     |                     |                   |         |         |                          |            |            |      |
|-------|-----|---------------------|-------------------|---------|---------|--------------------------|------------|------------|------|
| 11-01 | Gp3 | g.chr1:153303279G>C | Nonsense Mutation | PGLYRP4 | p.Y362* | peptidoglycan recogniti  | 60 (0.00)  | 52 (0.19)  | 0.51 |
| 11-01 | Gp3 | g.chr1:153312954C>T | Missense Mutation | PGLYRP4 | p.G243R | peptidoglycan recogniti  | 24 (0.00)  | 16 (0.38)  | 1.00 |
| 11-01 | Gp3 | g.chr1:153314209G>C | Missense Mutation | PGLYRP4 | p.I173M | peptidoglycan recogniti  | 18 (0.00)  | 12 (0.92)  | 2.44 |
| 11-01 | Gp3 | g.chr1:28793042G>A  | Missense Mutation | PHACTR4 | p.A206T | phosphatase and actin re | 42 (0.00)  | 46 (0.20)  | 0.52 |
| 11-01 | Gp3 | g.chr17:27251171C>A | Silent            | PHF12   | p.L157L | PHD finger protein 12    | 21 (0.00)  | 14 (0.43)  | 1.14 |
| 11-01 | Gp3 | g.chr4:129770157C>T | Missense Mutation | PHF17   | p.L107F |                          | 28 (0.00)  | 39 (0.21)  | 0.55 |
| 11-01 | Gp3 | g.chr9:123636944G>A | Silent            | PHF19   | p.L26L  | PHD finger protein 19    | 53 (0.02)  | 107 (0.26) | 0.70 |
| 11-01 | Gp3 | g.chr8:133829268G>A | Missense Mutation | PHF20L1 | p.G440E | PHD finger protein 20-l  | 54 (0.00)  | 49 (0.14)  | 0.38 |
| 11-01 | Gp3 | g.chr6:64404483G>A  | Missense Mutation | PHF3    | p.G837S | PHD finger protein 3     | 73 (0.00)  | 46 (0.28)  | 0.75 |
| 11-01 | Gp3 | g.chr1:120266061C>T | Missense Mutation | PHGDH   | p.A118V | phosphoglycerate dehyd   | 38 (0.00)  | 33 (0.15)  | 0.40 |
| 11-01 | Gp3 | g.chr1:120286612C>A | Missense Mutation | PHGDH   | p.S517R | phosphoglycerate dehyd   | 58 (0.00)  | 25 (0.28)  | 0.75 |
| 11-01 | Gp3 | g.chr16:30768239C>A | Missense Mutation | PHKG2   | p.H348N | phosphorylase kinase, g  | 22 (0.00)  | 22 (0.23)  | 0.61 |
| 11-01 | Gp3 | g.chr3:111630546C>A | Missense Mutation | PHLDB2  | p.S23Y  | pleckstrin homology-lik  | 26 (0.00)  | 28 (0.18)  | 0.48 |
| 11-01 | Gp3 | g.chr18:60396694C>T | Intron            | PHLPP1  |         | PH domain and leucine    | 35 (0.00)  | 29 (0.17)  | 0.46 |
| 11-01 | Gp3 | g.chr18:60401233C>T | Intron            | PHLPP1  |         | PH domain and leucine    | 74 (0.00)  | 41 (0.17)  | 0.46 |
| 11-01 | Gp3 | g.chr18:60412703T>A | Intron            | PHLPP1  |         | PH domain and leucine    | 56 (0.02)  | 32 (0.53)  | 1.42 |
| 11-01 | Gp3 | g.chr18:60426563C>T | Intron            | PHLPP1  |         | PH domain and leucine    | 51 (0.00)  | 28 (0.25)  | 0.67 |
| 11-01 | Gp3 | g.chr18:60434413G>A | Intron            | PHLPP1  |         | PH domain and leucine    | 35 (0.00)  | 19 (0.42)  | 1.12 |
| 11-01 | Gp3 | g.chr18:60440727C>A | Intron            | PHLPP1  |         | PH domain and leucine    | 61 (0.00)  | 25 (0.36)  | 0.96 |
| 11-01 | Gp3 | g.chr18:60446952G>A | Intron            | PHLPP1  |         | PH domain and leucine    | 45 (0.00)  | 45 (0.16)  | 0.41 |
| 11-01 | Gp3 | g.chr18:60467946G>T | Intron            | PHLPP1  |         | PH domain and leucine    | 42 (0.00)  | 20 (0.35)  | 0.93 |
| 11-01 | Gp3 | g.chr18:60470171G>A | Intron            | PHLPP1  |         | PH domain and leucine    | 151 (0.00) | 94 (0.15)  | 0.40 |
| 11-01 | Gp3 | g.chr18:60475104G>C | Intron            | PHLPP1  |         | PH domain and leucine    | 72 (0.00)  | 51 (0.22)  | 0.58 |
| 11-01 | Gp3 | g.chr18:60483041T>A | Intron            | PHLPP1  |         | PH domain and leucine    | 24 (0.00)  | 19 (0.26)  | 0.70 |
| 11-01 | Gp3 | g.chr18:60490220C>A | Intron            | PHLPP1  |         | PH domain and leucine    | 23 (0.00)  | 22 (0.27)  | 0.73 |
| 11-01 | Gp3 | g.chr18:60496229C>G | Intron            | PHLPP1  |         | PH domain and leucine    | 32 (0.00)  | 36 (0.33)  | 0.89 |
| 11-01 | Gp3 | g.chr18:60518435G>T | Intron            | PHLPP1  |         | PH domain and leucine    | 113 (0.00) | 112 (0.20) | 0.52 |
| 11-01 | Gp3 | g.chr18:60523459G>A | Intron            | PHLPP1  |         | PH domain and leucine    | 73 (0.00)  | 49 (0.16)  | 0.44 |
| 11-01 | Gp3 | g.chr18:60532872G>T | Intron            | PHLPP1  |         | PH domain and leucine    | 81 (0.00)  | 37 (0.16)  | 0.43 |
| 11-01 | Gp3 | g.chr18:60550776C>A | Intron            | PHLPP1  |         | PH domain and leucine    | 77 (0.00)  | 45 (0.16)  | 0.41 |
| 11-01 | Gp3 | g.chr18:60551286C>T | Intron            | PHLPP1  |         | PH domain and leucine    | 18 (0.00)  | 20 (0.35)  | 0.93 |
| 11-01 | Gp3 | g.chr18:60551293C>G | Intron            | PHLPP1  |         | PH domain and leucine    | 19 (0.00)  | 18 (0.44)  | 1.19 |
| 11-01 | Gp3 | g.chr18:60553488G>A | Intron            | PHLPP1  |         | PH domain and leucine    | 133 (0.01) | 60 (0.22)  | 0.58 |
| 11-01 | Gp3 | g.chr18:60586844C>A | Intron            | PHLPP1  |         | PH domain and leucine    | 83 (0.00)  | 61 (0.21)  | 0.57 |
| 11-01 | Gp3 | g.chr18:60593869G>C | Intron            | PHLPP1  |         | PH domain and leucine    | 106 (0.00) | 75 (0.59)  | 1.56 |

|       |     |                     |                     |         |          |                                  |            |            |      |
|-------|-----|---------------------|---------------------|---------|----------|----------------------------------|------------|------------|------|
| 11-01 | Gp3 | g.chr18:60601773C>T | Intron              | PHLPP1  |          | PH domain and leucine            | 67 (0.00)  | 69 (0.14)  | 0.39 |
| 11-01 | Gp3 | g.chr18:60605833C>A | Intron              | PHLPP1  |          | PH domain and leucine            | 16 (0.00)  | 26 (0.31)  | 0.82 |
| 11-01 | Gp3 | g.chr18:60612387G>A | Silent              | PHLPP1  | p.G1069G | PH domain and leucine            | 35 (0.00)  | 35 (0.20)  | 0.53 |
| 11-01 | Gp3 | g.chr18:60634170C>T | Intron              | PHLPP1  |          | PH domain and leucine            | 199 (0.00) | 109 (0.23) | 0.61 |
| 11-01 | Gp3 | g.chr16:71697863C>T | Intron              | PHLPP2  |          | PH domain and leucine            | 47 (0.00)  | 33 (0.27)  | 0.73 |
| 11-01 | Gp3 | g.chr16:71703586G>A | Intron              | PHLPP2  |          | PH domain and leucine            | 59 (0.00)  | 32 (0.28)  | 0.75 |
| 11-01 | Gp3 | g.chr16:71703608C>A | Intron              | PHLPP2  |          | PH domain and leucine            | 54 (0.00)  | 45 (0.22)  | 0.59 |
| 11-01 | Gp3 | g.chr16:71724583G>A | Nonsense Mutation   | PHLPP2  | p.R150*  | PH domain and leucine            | 60 (0.00)  | 27 (0.30)  | 0.79 |
| 11-01 | Gp3 | g.chr16:71736628C>A | Silent              | PHLPP2  | p.L97L   | PH domain and leucine            | 37 (0.00)  | 13 (0.54)  | 1.44 |
| 11-01 | Gp3 | g.chr7:77551987G>A  | Silent              | PHTF2   | p.E299E  | putative homeodomain t83         | (0.00)     | 46 (0.22)  | 0.58 |
| 11-01 | Gp3 | g.chr7:77552010C>A  | Nonsense Mutation   | PHTF2   | p.S307*  | putative homeodomain t86         | (0.01)     | 43 (0.23)  | 0.62 |
| 11-01 | Gp3 | g.chr4:25254085G>A  | Silent              | PI4K2B  | p.K137K  | phosphatidylinositol 4-k         | 56 (0.00)  | 21 (0.48)  | 1.27 |
| 11-01 | Gp3 | g.chr22:21153471C>T | Silent              | PI4KA   | p.L638L  | phosphatidylinositol 4-k         | 36 (0.00)  | 39 (0.21)  | 0.55 |
| 11-01 | Gp3 | g.chr1:151271436C>A | Missense Mutation   | PI4KB   | p.Q606H  | phosphatidylinositol 4-k         | 45 (0.02)  | 33 (0.27)  | 0.73 |
| 11-01 | Gp3 | g.chr22:38461035G>T | Missense Mutation   | PICK1   | p.L60F   | protein interacting with         | 33 (0.00)  | 35 (0.20)  | 0.53 |
| 11-01 | Gp3 | g.chr22:38471075C>T | Missense Mutation   | PICK1   | p.P395L  | protein interacting with         | 18 (0.00)  | 21 (0.29)  | 0.76 |
| 11-01 | Gp3 | g.chr1:172411172C>G | Silent              | PIGC    | p.L197L  | phosphatidylinositol gly         | 34 (0.00)  | 50 (0.22)  | 0.59 |
| 11-01 | Gp3 | g.chr17:34892981G>T | Missense Mutation   | PIGW    | p.V11F   | phosphatidylinositol gly         | 36 (0.00)  | 26 (0.35)  | 0.92 |
| 11-01 | Gp3 | g.chr3:196460660G>C | Missense Mutation   | PIGX    | p.V181L  | phosphatidylinositol gly         | 63 (0.00)  | 41 (0.22)  | 0.59 |
| 11-01 | Gp3 | g.chr1:9784385G>A   | Missense Mutation   | PIK3CD  | p.G924R  | phosphatidylinositol-4,5         | 23 (0.00)  | 16 (0.44)  | 1.17 |
| 11-01 | Gp3 | g.chr5:67569301G>T  | Nonsense Mutation   | PIK3R1  | p.E140*  | phosphoinositide-3-kina          | 77 (0.00)  | 38 (0.39)  | 1.05 |
| 11-01 | Gp3 | g.chr2:209200096C>T | Silent              | PIKFYVE | p.A1403A | phosphoinositide kinase          | 148 (0.01) | 132 (0.42) | 1.11 |
| 11-01 | Gp3 | g.chr17:36935699G>A | Silent              | PIP4K2B | p.Y197Y  | phosphatidylinositol-5- $\gamma$ | 80 (0.00)  | 32 (0.19)  | 0.50 |
| 11-01 | Gp3 | g.chr9:71532592G>A  | Silent              | PIP5K1B | p.Q300Q  | phosphatidylinositol-4- $\gamma$ | 42 (0.00)  | 27 (0.37)  | 0.99 |
| 11-01 | Gp3 | g.chr22:32058206C>A | De novo Start OutOf | PISD    |          | phosphatidylserine deca          | 23 (0.00)  | 28 (0.25)  | 0.40 |
| 11-01 | Gp3 | g.chr17:1456298C>T  | Splice Site         | PITPNA  | p.S66N   | phosphatidylinositol tra         | 78 (0.01)  | 44 (0.32)  | 0.85 |
| 11-01 | Gp3 | g.chr10:3181119G>A  | Missense Mutation   | PITRM1  | p.A965V  | pitrilysin metallopeptid         | 84 (0.00)  | 41 (0.17)  | 0.46 |
| 11-01 | Gp3 | g.chr7:47897397G>A  | Nonsense Mutation   | PKD1L1  | p.Q1466* | polycystic kidney diseas         | 24 (0.00)  | 16 (0.44)  | 1.17 |
| 11-01 | Gp3 | g.chr5:137226219C>T | Silent              | PKD2L2  | p.T27T   | polycystic kidney diseas         | 74 (0.00)  | 73 (0.22)  | 0.58 |
| 11-01 | Gp3 | g.chr2:42284415C>A  | Missense Mutation   | PKDCC   | p.P426Q  | protein kinase domain c          | 36 (0.00)  | 20 (0.45)  | 1.20 |
| 11-01 | Gp3 | g.chr22:46653797G>A | Missense Mutation   | PKDREJ  | p.P1808L | polycystin (PKD) famil           | 204 (0.00) | 198 (0.18) | 0.47 |
| 11-01 | Gp3 | g.chr6:51889437C>T  | Missense Mutation   | PKHD1   | p.G1724E | polycystic kidney and h          | 175 (0.01) | 79 (0.38)  | 1.01 |
| 11-01 | Gp3 | g.chr6:51889754G>A  | Silent              | PKHD1   | p.I1618I | polycystic kidney and h          | 67 (0.00)  | 23 (0.26)  | 0.70 |
| 11-01 | Gp3 | g.chr8:110456985C>A | Silent              | PKHD1L1 | p.I1629I | polycystic kidney and h          | 236 (0.00) | 121 (0.15) | 0.40 |
| 11-01 | Gp3 | g.chr8:110461618C>T | Missense Mutation   | PKHD1L1 | p.P2026L | polycystic kidney and h          | 72 (0.00)  | 60 (0.15)  | 0.40 |

|       |     |                     |                   |         |          |                         |             |            |      |
|-------|-----|---------------------|-------------------|---------|----------|-------------------------|-------------|------------|------|
| 11-01 | Gp3 | g.chr8:110523074G>C | Missense Mutation | PKHD1L1 | p.V3822L | polycystic kidney and h | 90 (0.00)   | 64 (0.20)  | 0.54 |
| 11-01 | Gp3 | g.chr8:110523107A>G | Missense Mutation | PKHD1L1 | p.T3833A | polycystic kidney and h | 75 (0.00)   | 49 (0.27)  | 0.71 |
| 11-01 | Gp3 | g.chr15:72502732G>T | Missense Mutation | PKM     | p.L112I  | pyruvate kinase, muscle | 93 (0.00)   | 98 (0.14)  | 0.38 |
| 11-01 | Gp3 | g.chr1:89250495G>A  | Missense Mutation | PKN2    | p.D387N  | protein kinase N2       | 29 (0.00)   | 19 (0.53)  | 1.40 |
| 11-01 | Gp3 | g.chr12:33003840C>A | Missense Mutation | PKP2    | p.R413L  | plakophilin 2           | 92 (0.00)   | 45 (0.24)  | 0.65 |
| 11-01 | Gp3 | g.chr3:119334902C>A | Silent            | PLA1A   | p.V63V   | phospholipase A1 mem    | 19 (0.00)   | 23 (0.30)  | 0.81 |
| 11-01 | Gp3 | g.chr16:14766496G>T | Missense Mutation | PLA2G10 | p.L156I  | phospholipase A2, grou  | 23 (0.00)   | 40 (0.15)  | 0.40 |
| 11-01 | Gp3 | g.chr15:42373730C>G | Missense Mutation | PLA2G4D | p.A302P  | phospholipase A2, grou  | 75 (0.01)   | 56 (0.14)  | 0.38 |
| 11-01 | Gp3 | g.chr15:42285004G>A | Silent            | PLA2G4E | p.S467S  | phospholipase A2, grou  | 23 (0.00)   | 20 (0.35)  | 0.93 |
| 11-01 | Gp3 | g.chr8:57080709G>A  | Silent            | PLAG1   | p.D40D   | pleiomorphic adenoma    | ξ33 (0.00)  | 16 (0.38)  | 1.25 |
| 11-01 | Gp3 | g.chr8:57080825C>G  | Missense Mutation | PLAG1   | p.A2P    | pleiomorphic adenoma    | ξ50 (0.00)  | 21 (0.29)  | 0.96 |
| 11-01 | Gp3 | g.chr6:144263008G>A | Silent            | PLAGL1  | p.S315S  | pleiomorphic adenoma    | ξ149 (0.00) | 109 (0.21) | 0.56 |
| 11-01 | Gp3 | g.chr20:30784717C>A | Missense Mutation | PLAGL2  | p.Q343H  | pleiomorphic adenoma    | ξ43 (0.00)  | 33 (0.15)  | 0.40 |
| 11-01 | Gp3 | g.chr19:44153107G>C | Missense Mutation | PLAUR   | p.L315V  | plasminogen activator,  | ι52 (0.00)  | 31 (0.29)  | 0.77 |
| 11-01 | Gp3 | g.chr15:40582818C>T | Missense Mutation | PLCB2   | p.G1057S | phospholipase C, beta   | 287 (0.00)  | 76 (0.25)  | 0.67 |
| 11-01 | Gp3 | g.chr3:155200357G>A | Missense Mutation | PLCH1   | p.S1161F | phospholipase C, eta    | 120 (0.00)  | 17 (0.71)  | 1.88 |
| 11-01 | Gp3 | g.chr2:198949132C>T | Silent            | PLCL1   | p.R297R  | phospholipase C-like    | 191 (0.00)  | 57 (0.18)  | 0.47 |
| 11-01 | Gp3 | g.chr2:198949152G>A | Missense Mutation | PLCL1   | p.C304Y  | phospholipase C-like    | 189 (0.00)  | 54 (0.19)  | 0.49 |
| 11-01 | Gp3 | g.chr2:198949952G>T | Missense Mutation | PLCL1   | p.D571Y  | phospholipase C-like    | 143 (0.00)  | 31 (0.32)  | 0.86 |
| 11-01 | Gp3 | g.chr5:41382023C>A  | Missense Mutation | PLCXD3  | p.K239N  | phosphatidylinositol-sp | ε43 (0.02)  | 24 (0.33)  | 0.89 |
| 11-01 | Gp3 | g.chr2:179365841G>A | Missense Mutation | PLEKHA3 | p.R238Q  | pleckstrin homology do  | ι73 (0.00)  | 12 (0.42)  | 1.11 |
| 11-01 | Gp3 | g.chr1:204210941G>A | Splice Site       | PLEKHA6 | p.P745L  | pleckstrin homology do  | ι60 (0.00)  | 34 (0.15)  | 0.39 |
| 11-01 | Gp3 | g.chr12:6428028C>G  | Missense Mutation | PLEKHG6 | p.P465A  | pleckstrin homology do  | ι23 (0.00)  | 27 (0.19)  | 0.49 |
| 11-01 | Gp3 | g.chr12:6428261C>A  | Missense Mutation | PLEKHG6 | p.T504N  | pleckstrin homology do  | ι21 (0.00)  | 30 (0.20)  | 0.53 |
| 11-01 | Gp3 | g.chr2:208725924C>G | Silent            | PLEKHM3 | p.V671V  | pleckstrin homology do  | ι58 (0.00)  | 34 (0.21)  | 0.55 |
| 11-01 | Gp3 | g.chr19:4512931C>T  | Silent            | PLIN4   | p.V333V  | perilipin 4             | 35 (0.00)   | 19 (0.26)  | 0.70 |
| 11-01 | Gp3 | g.chr5:57750785T>A  | Nonsense Mutation | PLK2    | p.K607*  | polo-like kinase 2      | 118 (0.00)  | 117 (0.21) | 0.55 |
| 11-01 | Gp3 | g.chr4:128812302C>A | Missense Mutation | PLK4    | p.S588Y  | polo-like kinase 4      | 23 (0.00)   | 16 (0.56)  | 1.50 |
| 11-01 | Gp3 | g.chr4:155461937C>T | Splice Site       | PLRG1   | p.K279K  | pleiotropic regulator   | 173 (0.00)  | 34 (0.26)  | 0.71 |
| 11-01 | Gp3 | g.chr17:37296061C>A | Missense Mutation | PLXDC1  | p.G34V   | plexin domain contain   | ι24 (0.00)  | 30 (0.17)  | 0.44 |
| 11-01 | Gp3 | g.chr17:37296062C>G | Missense Mutation | PLXDC1  | p.G34R   | plexin domain contain   | ι24 (0.00)  | 30 (0.17)  | 0.44 |
| 11-01 | Gp3 | g.chr3:126751304C>A | Missense Mutation | PLXNA1  | p.T1769K | plexin A1               | 41 (0.00)   | 22 (0.32)  | 0.85 |
| 11-01 | Gp3 | g.chr7:131866155C>T | Silent            | PLXNA4  | p.T1159T | plexin A4               | 70 (0.00)   | 26 (0.19)  | 0.51 |
| 11-01 | Gp3 | g.chr3:48464182G>A  | Silent            | PLXNB1  | p.L428L  | plexin B1               | 21 (0.00)   | 16 (0.50)  | 1.33 |
| 11-01 | Gp3 | g.chr3:48464299G>A  | Missense Mutation | PLXNB1  | p.R389W  | plexin B1               | 26 (0.00)   | 27 (0.48)  | 1.28 |

|       |     |                      |                   |         |          |                                     |            |      |
|-------|-----|----------------------|-------------------|---------|----------|-------------------------------------|------------|------|
| 11-01 | Gp3 | g.chr1:205811861C>G  | Missense Mutation | PM20D1  | p.M282I  | peptidase M20 domain c33 (0.00)     | 42 (0.38)  | 1.02 |
| 11-01 | Gp3 | g.chr7:6760378G>T    | RNA               | PMS2CL  |          | PMS2 C-terminal like p:34 (0.00)    | 31 (0.19)  | 0.52 |
| 11-01 | Gp3 | g.chr6:99848489C>T   | Missense Mutation | PNISR   | p.R782Q  | PNN-interacting serine/184 (0.00)   | 95 (0.31)  | 0.47 |
| 11-01 | Gp3 | g.chr6:160240034C>T  | Silent            | PNLDC1  | p.V438V  | poly(A)-specific ribonuc35 (0.00)   | 28 (0.36)  | 0.95 |
| 11-01 | Gp3 | g.chr19:46974230G>A  | Silent            | PNMAL1  | p.I21I   | paraneoplastic Ma antigen33 (0.00)  | 35 (0.34)  | 0.91 |
| 11-01 | Gp3 | g.chr14:39650483C>T  | Silent            | PNN     | p.L524L  | pinin, desmosome assoc 87 (0.00)    | 86 (0.19)  | 0.50 |
| 11-01 | Gp3 | g.chr9:140438006C>A  | Missense Mutation | PNPLA7  | p.K103N  | patatin-like phospholipa 15 (0.00)  | 29 (0.24)  | 0.64 |
| 11-01 | Gp3 | g.chr3:127379902C>G  | Missense Mutation | PODXL2  | p.T344R  | podocalyxin-like 2 76 (0.00)        | 60 (0.17)  | 0.44 |
| 11-01 | Gp3 | g.chr3:119190176C>G  | Missense Mutation | POGLUT1 | p.T66S   | protein O-glucosyltransf69 (0.00)   | 47 (0.15)  | 0.40 |
| 11-01 | Gp3 | g.chr1:151377999G>A  | Missense Mutation | POGZ    | p.P1162L | pogo transposable elemε48 (0.02)    | 47 (0.15)  | 0.40 |
| 11-01 | Gp3 | g.chr1:151378074G>A  | Missense Mutation | POGZ    | p.A1137V | pogo transposable elemε44 (0.00)    | 56 (0.14)  | 0.38 |
| 11-01 | Gp3 | g.chr12:133202878G>C | Missense Mutation | POLE    | p.T2119R | polymerase (DNA direc 24 (0.00)     | 34 (0.18)  | 0.47 |
| 11-01 | Gp3 | g.chr14:50140843G>T  | Missense Mutation | POLE2   | p.Q139K  | polymerase (DNA direc 63 (0.00)     | 29 (0.21)  | 0.55 |
| 11-01 | Gp3 | g.chr6:43572393C>T   | Missense Mutation | POLH    | p.P309L  | polymerase (DNA direc 82 (0.00)     | 63 (0.16)  | 0.42 |
| 11-01 | Gp3 | g.chr6:43581422C>T   | Missense Mutation | POLH    | p.L424F  | polymerase (DNA direc 98 (0.00)     | 80 (0.21)  | 0.57 |
| 11-01 | Gp3 | g.chr10:103345146G>C | Missense Mutation | POLL    | p.S167C  | polymerase (DNA direc 21 (0.00)     | 20 (0.35)  | 0.93 |
| 11-01 | Gp3 | g.chr2:113326388C>G  | Silent            | POLR1B  | p.L605L  | polymerase (RNA) I pol61 (0.00)     | 42 (0.19)  | 0.51 |
| 11-01 | Gp3 | g.chr17:7415476G>T   | Splice Site       | POLR2A  |          | polymerase (RNA) II (E 18 (0.00)    | 10 (0.50)  | 1.33 |
| 11-01 | Gp3 | g.chr16:57503972C>A  | Missense Mutation | POLR2C  | p.A180E  | polymerase (RNA) II (E 33 (0.00)    | 25 (0.36)  | 0.96 |
| 11-01 | Gp3 | g.chr11:62532878G>T  | Splice Site       | POLR2G  |          | polymerase (RNA) II (E 51 (0.00)    | 41 (0.20)  | 0.52 |
| 11-01 | Gp3 | g.chr10:79737276A>G  | Missense Mutation | POLR3A  | p.I1378T | polymerase (RNA) III (I109 (0.00)   | 62 (0.15)  | 0.39 |
| 11-01 | Gp3 | g.chr10:79785514T>A  | Missense Mutation | POLR3A  | p.T62S   | polymerase (RNA) III (I35 (0.00)    | 30 (0.20)  | 0.53 |
| 11-01 | Gp3 | g.chr1:145608408C>T  | Missense Mutation | POLR3C  | p.M133I  | polymerase (RNA) III (I121 (0.01)   | 85 (0.16)  | 0.44 |
| 11-01 | Gp3 | g.chr1:145457292G>A  | Missense Mutation | POLR3GL | p.P134S  | polymerase (RNA) III (I16 (0.00)    | 21 (0.29)  | 0.76 |
| 11-01 | Gp3 | g.chr18:14533145G>A  | Missense Mutation | POTEC   | p.L324F  | POTE ankyrin domain f 66 (0.00)     | 28 (0.18)  | 0.48 |
| 11-01 | Gp3 | g.chr1:167334738G>A  | Silent            | POU2F1  | p.Q43Q   | POU class 2 homeobox 46 (0.00)      | 41 (0.34)  | 0.91 |
| 11-01 | Gp3 | g.chr1:167370776C>T  | Missense Mutation | POU2F1  | p.T502M  | POU class 2 homeobox 26 (0.00)      | 17 (0.29)  | 0.78 |
| 11-01 | Gp3 | g.chr22:46614288G>C  | Missense Mutation | PPARA   | p.M166I  | peroxisome proliferator- 157 (0.00) | 110 (0.15) | 0.39 |
| 11-01 | Gp3 | g.chr12:81747019C>A  | Missense Mutation | PPFIA2  | p.D625Y  | protein tyrosine phosphε210 (0.00)  | 198 (0.16) | 0.42 |
| 11-01 | Gp3 | g.chr12:82147793G>T  | Silent            | PPFIA2  | p.R70R   | protein tyrosine phosphε43 (0.00)   | 29 (0.24)  | 0.64 |
| 11-01 | Gp3 | g.chr19:49641646G>A  | Missense Mutation | PPFIA3  | p.A680T  | protein tyrosine phosphε20 (0.00)   | 45 (0.24)  | 0.65 |
| 11-01 | Gp3 | g.chr12:27835572C>A  | Missense Mutation | PPFIBP1 | p.P728H  | PTPRF interacting prote60 (0.00)    | 29 (0.17)  | 0.46 |
| 11-01 | Gp3 | g.chr12:42792759C>A  | Missense Mutation | PPHLN1  | p.S171Y  | periphilin 1 23 (0.00)              | 28 (0.18)  | 0.48 |
| 11-01 | Gp3 | g.chr12:42792760T>A  | Silent            | PPHLN1  | p.S171S  | periphilin 1 23 (0.00)              | 27 (0.19)  | 0.49 |
| 11-01 | Gp3 | g.chr7:44839030G>A   | Missense Mutation | PPIA    | p.G47D   | peptidylprolyl isomerase68 (0.00)   | 61 (0.33)  | 0.87 |

|       |     |                      |                   |          |          |                              |            |            |      |
|-------|-----|----------------------|-------------------|----------|----------|------------------------------|------------|------------|------|
| 11-01 | Gp3 | g.chr5:102495032G>T  | Splice Site       | PPIP5K2  | p.K640N  | diphosphoinositol penta      | 43 (0.00)  | 33 (0.24)  | 0.65 |
| 11-01 | Gp3 | g.chr12:63226000G>A  | Missense Mutation | PPM1H    | p.T102I  | protein phosphatase, M $\xi$ | 27 (0.00)  | 29 (0.17)  | 0.46 |
| 11-01 | Gp3 | g.chr4:89199653A>G   | Missense Mutation | PPM1K    | p.L28P   | protein phosphatase, M $\xi$ | 41 (0.00)  | 25 (0.24)  | 0.64 |
| 11-01 | Gp3 | g.chr1:202385984G>A  | Missense Mutation | PPP1R12B | p.D121N  | protein phosphatase 1, r     | 52 (0.02)  | 52 (0.15)  | 0.41 |
| 11-01 | Gp3 | g.chr17:37790236G>A  | Silent            | PPP1R1B  | p.L114L  | protein phosphatase 1, r     | 77 (0.00)  | 47 (0.17)  | 0.45 |
| 11-01 | Gp3 | g.chr11:111631661C>A | Missense Mutation | PPP2R1B  | p.V141L  | protein phosphatase 2, r     | 25 (0.00)  | 30 (0.33)  | 0.89 |
| 11-01 | Gp3 | g.chr14:102359423C>T | Missense Mutation | PPP2R5C  | p.S259F  | protein phosphatase 2, r     | 42 (0.00)  | 30 (0.23)  | 0.62 |
| 11-01 | Gp3 | g.chr14:63920434C>G  | Missense Mutation | PPP2R5E  | p.E109D  | protein phosphatase 2, r     | 26 (0.00)  | 33 (0.45)  | 1.21 |
| 11-01 | Gp3 | g.chr10:75198161G>A  | Missense Mutation | PPP3CB   | p.P472S  | protein phosphatase 3, c     | 86 (0.00)  | 44 (0.23)  | 0.61 |
| 11-01 | Gp3 | g.chr8:22368632C>T   | Missense Mutation | PPP3CC   | p.A173V  | protein phosphatase 3, c     | 142 (0.00) | 48 (0.27)  | 0.40 |
| 11-01 | Gp3 | g.chr9:127933448G>A  | Silent            | PPP6C    | p.D29D   | protein phosphatase 6, c     | 49 (0.00)  | 46 (0.30)  | 0.81 |
| 11-01 | Gp3 | g.chr19:55757044T>A  | Missense Mutation | PPP6R1   | p.Y77F   | protein phosphatase 6, r     | 15 (0.00)  | 22 (0.23)  | 0.61 |
| 11-01 | Gp3 | g.chr11:68343428C>G  | Missense Mutation | PPP6R3   | p.L256V  | protein phosphatase 6, r     | 42 (0.00)  | 56 (0.39)  | 1.05 |
| 11-01 | Gp3 | g.chr11:68343437G>A  | Missense Mutation | PPP6R3   | p.E259K  | protein phosphatase 6, r     | 46 (0.02)  | 69 (0.49)  | 1.31 |
| 11-01 | Gp3 | g.chr10:103909687C>T | Silent            | PPRC1    | p.S1632S | peroxisome proliferator-     | 76 (0.00)  | 37 (0.16)  | 0.43 |
| 11-01 | Gp3 | g.chr5:64867676G>A   | Missense Mutation | PPWD1    | p.G178R  | peptidylprolyl isomeras      | 58 (0.00)  | 41 (0.22)  | 0.59 |
| 11-01 | Gp3 | g.chr22:22890747C>T  | Silent            | PRAME    | p.Q424Q  | preferentially expressed     | 74 (0.00)  | 40 (0.15)  | 0.40 |
| 11-01 | Gp3 | g.chr1:12854277C>T   | Silent            | PRAMEF1  | p.L167L  | PRAME family member          | 305 (0.00) | 151 (0.15) | 0.41 |
| 11-01 | Gp3 | g.chr1:12854487C>T   | Silent            | PRAMEF1  | p.L237L  | PRAME family member          | 281 (0.00) | 132 (0.17) | 0.46 |
| 11-01 | Gp3 | g.chr1:12887512G>A   | Silent            | PRAMEF11 | p.L115L  | PRAME family member          | 115 (0.00) | 93 (0.38)  | 1.00 |
| 11-01 | Gp3 | g.chr1:12837389G>T   | Missense Mutation | PRAMEF12 | p.A367S  | PRAME family member          | 87 (0.00)  | 40 (0.15)  | 0.40 |
| 11-01 | Gp3 | g.chr1:12837411G>T   | Missense Mutation | PRAMEF12 | p.R374L  | PRAME family member          | 91 (0.00)  | 42 (0.14)  | 0.38 |
| 11-01 | Gp3 | g.chr1:13475086G>T   | Missense Mutation | PRAMEF18 | p.A348D  | PRAME family member          | 37 (0.00)  | 21 (0.43)  | 1.14 |
| 11-01 | Gp3 | g.chr1:13475107C>T   | Missense Mutation | PRAMEF18 | p.R341Q  | PRAME family member          | 27 (0.00)  | 17 (0.53)  | 1.41 |
| 11-01 | Gp3 | g.chr15:91524785C>A  | Missense Mutation | PRC1     | p.D206Y  | protein regulator of cyto    | 71 (0.00)  | 33 (0.15)  | 0.40 |
| 11-01 | Gp3 | g.chr6:106553788G>A  | Missense Mutation | PRDM1    | p.G549S  | PR domain containing         | 136 (0.00) | 13 (0.46)  | 0.72 |
| 11-01 | Gp3 | g.chr11:129780402C>A | Silent            | PRDM10   | p.L1044L | PR domain containing         | 150 (0.00) | 33 (0.24)  | 0.65 |
| 11-01 | Gp3 | g.chr8:70970875C>T   | Splice Site       | PRDM14   | p.K462K  | PR domain containing         | 160 (0.00) | 55 (0.13)  | 0.42 |
| 11-01 | Gp3 | g.chr8:70970914G>T   | Silent            | PRDM14   | p.I449I  | PR domain containing         | 168 (0.00) | 69 (0.19)  | 0.63 |
| 11-01 | Gp3 | g.chr21:43277385C>A  | Missense Mutation | PRDM15   | p.G99V   | PR domain containing         | 141 (0.00) | 39 (0.15)  | 0.41 |
| 11-01 | Gp3 | g.chr16:90126855G>A  | Missense Mutation | PRDM7    | p.S376L  | PR domain containing         | 730 (0.00) | 38 (0.26)  | 0.70 |
| 11-01 | Gp3 | g.chr2:27354881G>A   | Silent            | PREB     | p.L332L  | prolactin regulatory ele     | 51 (0.02)  | 50 (0.18)  | 0.48 |
| 11-01 | Gp3 | g.chr2:27354883G>A   | Missense Mutation | PREB     | p.L332F  | prolactin regulatory ele     | 51 (0.00)  | 50 (0.18)  | 0.48 |
| 11-01 | Gp3 | g.chr1:203452858C>A  | Missense Mutation | PRELP    | p.H182Q  | proline/arginine-rich en     | 60 (0.00)  | 37 (0.22)  | 0.58 |
| 11-01 | Gp3 | g.chr1:203453022C>A  | Missense Mutation | PRELP    | p.P237Q  | proline/arginine-rich en     | 105 (0.01) | 75 (0.19)  | 0.50 |

|       |     |                      |                   |          |          |                                            |            |            |      |
|-------|-----|----------------------|-------------------|----------|----------|--------------------------------------------|------------|------------|------|
| 11-01 | Gp3 | g.chr1:186278068C>T  | Missense Mutation | PRG4     | p.L1073F | proteoglycan 4                             | 114 (0.00) | 62 (0.32)  | 0.86 |
| 11-01 | Gp3 | g.chr12:42858962G>T  | Missense Mutation | PRICKLE1 | p.P292T  | prickle homolog 1 (Drosophila)             | 27 (0.00)  | 28 (0.18)  | 0.48 |
| 11-01 | Gp3 | g.chr12:120117776G>A | Missense Mutation | PRKAB1   | p.M69I   | protein kinase, AMP-activated              | 40 (0.00)  | 47 (0.19)  | 0.51 |
| 11-01 | Gp3 | g.chr12:120117802T>C | Missense Mutation | PRKAB1   | p.I78T   | protein kinase, AMP-activated              | 38 (0.00)  | 41 (0.22)  | 0.59 |
| 11-01 | Gp3 | g.chr17:66519037G>T  | Silent            | PRKAR1A  | p.T106T  | protein kinase, cAMP-dependent             | 37 (0.00)  | 16 (0.44)  | 1.17 |
| 11-01 | Gp3 | g.chr3:53217572G>A   | Silent            | PRKCD    | p.L254L  | protein kinase C, delta                    | 25 (0.00)  | 34 (0.18)  | 0.47 |
| 11-01 | Gp3 | g.chr3:53223978G>A   | Silent            | PRKCD    | p.L611L  | protein kinase C, delta                    | 91 (0.00)  | 68 (0.15)  | 0.39 |
| 11-01 | Gp3 | g.chr2:46237822G>T   | Splice Site       | PRKCE    |          | protein kinase C, epsilon                  | 46 (0.00)  | 29 (0.17)  | 0.46 |
| 11-01 | Gp3 | g.chr14:61924356C>G  | Missense Mutation | PRKCH    | p.H413D  | protein kinase C, eta                      | 45 (0.00)  | 33 (0.82)  | 2.18 |
| 11-01 | Gp3 | g.chr10:6506277C>T   | Silent            | PRKCQ    | p.A481A  | protein kinase C, theta                    | 232 (0.00) | 174 (0.15) | 0.40 |
| 11-01 | Gp3 | g.chr2:179314986C>T  | Missense Mutation | PRKRA    | p.G73D   | protein kinase, interferon-inducible       | 92 (0.00)  | 43 (0.23)  | 0.62 |
| 11-01 | Gp3 | g.chr7:102040085T>C  | Missense Mutation | PRKRIP1  | p.M42T   | PRKR interacting protein                   | 34 (0.00)  | 40 (0.42)  | 1.13 |
| 11-01 | Gp3 | g.chrX:3573255G>A    | Silent            | PRKX     | p.I178I  | protein kinase, X-linked                   | 42 (0.00)  | 40 (0.30)  | 0.50 |
| 11-01 | Gp3 | g.chr6:22294726C>A   | Missense Mutation | PRL      | p.C39F   | prolactin                                  | 20 (0.00)  | 28 (0.21)  | 0.57 |
| 11-01 | Gp3 | g.chr4:148594930G>T  | Missense Mutation | PRMT10   | p.A145E  |                                            | 43 (0.00)  | 30 (0.27)  | 0.71 |
| 11-01 | Gp3 | g.chr16:68379688C>A  | Nonsense Mutation | PRMT7    | p.Y346*  | protein arginine methyltransferase         | 30 (0.00)  | 26 (0.35)  | 0.92 |
| 11-01 | Gp3 | g.chr4:16035014C>T   | Missense Mutation | PROM1    | p.G132E  | prominin 1                                 | 97 (0.00)  | 47 (0.28)  | 0.74 |
| 11-01 | Gp3 | g.chr1:150325375C>T  | Missense Mutation | PRPF3    | p.R658C  | pre-mRNA processing factor                 | 36 (0.00)  | 58 (0.17)  | 0.46 |
| 11-01 | Gp3 | g.chr1:109238328C>A  | Missense Mutation | PRPF38B  | p.T94K   | pre-mRNA processing factor                 | 44 (0.00)  | 34 (0.15)  | 0.39 |
| 11-01 | Gp3 | g.chr12:50025684G>A  | Missense Mutation | PRPF40B  | p.M90I   | PRP40 pre-mRNA processing factor           | 60 (0.00)  | 86 (0.33)  | 0.87 |
| 11-01 | Gp3 | g.chr12:50036776C>T  | Missense Mutation | PRPF40B  | p.H728Y  | PRP40 pre-mRNA processing factor           | 18 (0.00)  | 24 (0.33)  | 0.89 |
| 11-01 | Gp3 | g.chr6:4032916G>C    | Missense Mutation | PRPF4B   | p.G389R  | pre-mRNA processing factor                 | 67 (0.00)  | 85 (0.34)  | 0.91 |
| 11-01 | Gp3 | g.chr6:4032980C>A    | Missense Mutation | PRPF4B   | p.S410Y  | pre-mRNA processing factor                 | 58 (0.00)  | 72 (0.28)  | 0.74 |
| 11-01 | Gp3 | g.chr17:1556844G>A   | Missense Mutation | PRPF8    | p.R2121W | pre-mRNA processing factor                 | 49 (0.00)  | 35 (0.20)  | 0.53 |
| 11-01 | Gp3 | g.chr17:1562797G>A   | Silent            | PRPF8    | p.I1664I | pre-mRNA processing factor                 | 85 (0.00)  | 101 (0.15) | 0.40 |
| 11-01 | Gp3 | g.chr17:1585160C>A   | Missense Mutation | PRPF8    | p.V203L  | pre-mRNA processing factor                 | 33 (0.00)  | 23 (0.39)  | 1.04 |
| 11-01 | Gp3 | g.chr7:18067306T>A   | Nonsense Mutation | PRPS1L1  | p.K34*   | phosphoribosyl pyrophosphatase             | 219 (0.00) | 141 (0.23) | 0.61 |
| 11-01 | Gp3 | g.chr17:18781017G>T  | Silent            | PRPSAP2  | p.V82V   | phosphoribosyl pyrophosphatase             | 22 (0.00)  | 31 (0.23)  | 0.60 |
| 11-01 | Gp3 | g.chr19:50118234G>A  | Silent            | PRR12    | p.R1664R | proline rich 12                            | 28 (0.00)  | 35 (0.49)  | 1.30 |
| 11-01 | Gp3 | g.chr22:32081672C>T  | Silent            | PRR14L   | p.R2099R | proline rich 14-like                       | 66 (0.00)  | 36 (0.28)  | 0.44 |
| 11-01 | Gp3 | g.chr22:32134537C>T  | Missense Mutation | PRR14L   | p.A104T  | proline rich 14-like                       | 24 (0.00)  | 23 (0.70)  | 1.11 |
| 11-01 | Gp3 | g.chr9:134360087G>T  | Missense Mutation | PRRC2B   | p.Q1131H | proline-rich coiled-coil domain containing | 82 (0.00)  | 64 (0.17)  | 0.46 |
| 11-01 | Gp3 | g.chr1:171511289C>T  | Missense Mutation | PRRC2C   | p.P1560S | proline-rich coiled-coil domain containing | 102 (0.00) | 61 (0.16)  | 0.44 |
| 11-01 | Gp3 | g.chr1:171546708G>A  | Missense Mutation | PRRC2C   | p.S2362N | proline-rich coiled-coil domain containing | 153 (0.01) | 211 (0.16) | 0.42 |
| 11-01 | Gp3 | g.chr7:142457361T>C  | Missense Mutation | PRSS1    | p.F9S    | protease, serine, 1 (trypsin-like)         | 80 (0.00)  | 31 (0.16)  | 0.43 |

|       |     |                     |                   |         |          |                             |            |            |      |
|-------|-----|---------------------|-------------------|---------|----------|-----------------------------|------------|------------|------|
| 11-01 | Gp3 | g.chr6:84234030C>A  | Nonsense Mutation | PRSS35  | p.Y290*  | protease, serine, 35        | 34 (0.00)  | 10 (0.50)  | 1.33 |
| 11-01 | Gp3 | g.chr7:141537702C>A | Missense Mutation | PRSS37  | p.V130F  | protease, serine, 37        | 62 (0.00)  | 23 (0.22)  | 0.58 |
| 11-01 | Gp3 | g.chr16:58314455G>A | Silent            | PRSS54  | p.F287F  | protease, serine, 54        | 27 (0.00)  | 18 (0.28)  | 0.74 |
| 11-01 | Gp3 | g.chr10:25160939C>A | Silent            | PRTFDC1 | p.T131T  | phosphoribosyl transferase  | 45 (0.00)  | 66 (0.26)  | 0.69 |
| 11-01 | Gp3 | g.chr15:55964725C>A | Silent            | PRTG    | p.L653L  | protogenin                  | 56 (0.00)  | 74 (0.15)  | 0.40 |
| 11-01 | Gp3 | g.chr15:55974675C>T | Missense Mutation | PRTG    | p.G188E  | protogenin                  | 50 (0.02)  | 28 (0.32)  | 0.86 |
| 11-01 | Gp3 | g.chr10:73578818C>T | Silent            | PSAP    | p.V467V  | prosaposin                  | 49 (0.00)  | 37 (0.22)  | 0.58 |
| 11-01 | Gp3 | g.chr5:139217259C>G | Missense Mutation | PSD2    | p.A572G  | pleckstrin and Sec7 domain  | 54 (0.00)  | 50 (0.28)  | 0.75 |
| 11-01 | Gp3 | g.chr5:139221949C>T | Silent            | PSD2    | p.L736L  | pleckstrin and Sec7 domain  | 17 (0.00)  | 15 (0.47)  | 1.24 |
| 11-01 | Gp3 | g.chr14:73678531G>A | Missense Mutation | PSEN1   | p.S245N  | presenilin 1                | 43 (0.00)  | 40 (0.28)  | 0.73 |
| 11-01 | Gp3 | g.chr1:227068358G>A | Silent            | PSEN2   | p.G4G    | presenilin 2                | 175 (0.00) | 61 (0.15)  | 0.39 |
| 11-01 | Gp3 | g.chr1:227081758G>C | Missense Mutation | PSEN2   | p.G408R  | presenilin 2                | 25 (0.00)  | 14 (0.36)  | 0.95 |
| 11-01 | Gp3 | g.chr19:43579555C>G | Silent            | PSG2    | p.R220R  | pregnancy specific beta-2   | 247 (0.00) | 203 (0.15) | 0.39 |
| 11-01 | Gp3 | g.chr19:43242967G>A | Silent            | PSG3    | p.T113T  | pregnancy specific beta-68  | 68 (0.00)  | 34 (0.21)  | 0.55 |
| 11-01 | Gp3 | g.chr19:43689077G>C | Missense Mutation | PSG5    | p.T96S   | pregnancy specific beta-71  | 71 (0.00)  | 36 (0.19)  | 0.52 |
| 11-01 | Gp3 | g.chr19:43411315G>A | Silent            | PSG6    | p.L240L  | pregnancy specific beta-77  | 77 (0.00)  | 63 (0.17)  | 0.47 |
| 11-01 | Gp3 | g.chr19:43262204C>T | Missense Mutation | PSG8    | p.R220Q  | pregnancy specific beta-187 | 187 (0.01) | 113 (0.19) | 0.52 |
| 11-01 | Gp3 | g.chr14:90736646C>A | Missense Mutation | PSMC1   | p.L380M  | proteasome (prosome, n28)   | 28 (0.00)  | 34 (0.15)  | 0.39 |
| 11-01 | Gp3 | g.chr3:184021785G>A | Silent            | PSMD2   | p.E458E  | proteasome (prosome, n65)   | 65 (0.00)  | 43 (0.23)  | 0.62 |
| 11-01 | Gp3 | g.chr3:184022152G>A | Silent            | PSMD2   | p.V504V  | proteasome (prosome, n59)   | 59 (0.00)  | 45 (0.16)  | 0.41 |
| 11-01 | Gp3 | g.chr9:123580283G>A | Silent            | PSMD5   | p.I472I  | proteasome (prosome, n44)   | 44 (0.00)  | 25 (0.32)  | 0.85 |
| 11-01 | Gp3 | g.chr2:54115127C>A  | Splice Site       | PSME4   |          | proteasome (prosome, n31)   | 31 (0.00)  | 24 (0.25)  | 0.67 |
| 11-01 | Gp3 | g.chr2:54115128T>A  | Splice Site       | PSME4   |          | proteasome (prosome, n31)   | 31 (0.00)  | 24 (0.25)  | 0.67 |
| 11-01 | Gp3 | g.chr2:54127089C>G  | Missense Mutation | PSME4   | p.Q1117H | proteasome (prosome, n53)   | 53 (0.00)  | 39 (0.23)  | 0.62 |
| 11-01 | Gp3 | g.chr20:1108081C>T  | Nonsense Mutation | PSMF1   | p.Q99*   | proteasome (prosome, n110)  | 110 (0.00) | 45 (0.29)  | 0.77 |
| 11-01 | Gp3 | g.chr20:1145057C>T  | Missense Mutation | PSMF1   | p.P234L  | proteasome (prosome, n105)  | 105 (0.00) | 37 (0.16)  | 0.43 |
| 11-01 | Gp3 | g.chr9:72333308C>A  | Missense Mutation | PTAR1   | p.A387S  | protein prenyltransferase   | 17 (0.00)  | 17 (0.53)  | 1.41 |
| 11-01 | Gp3 | g.chr10:27688110C>A | Missense Mutation | PTCHD3  | p.D473Y  | patched domain containing   | 25 (0.00)  | 21 (0.57)  | 1.52 |
| 11-01 | Gp3 | g.chr6:47846092C>G  | Missense Mutation | PTCHD4  | p.E830Q  | patched domain containing   | 54 (0.02)  | 33 (0.55)  | 1.45 |
| 11-01 | Gp3 | g.chr8:97345688C>A  | Missense Mutation | PTDSS1  | p.S439Y  | phosphatidylserine synthase | 31 (0.00)  | 39 (0.36)  | 1.20 |
| 11-01 | Gp3 | g.chr10:89646386C>A | Intron            | PTEN    |          | phosphatase and tensin      | 123 (0.00) | 22 (0.59)  | 0.81 |
| 11-01 | Gp3 | g.chr10:89647711G>A | Intron            | PTEN    |          | phosphatase and tensin      | 166 (0.00) | 28 (0.29)  | 0.39 |
| 11-01 | Gp3 | g.chr10:89695984C>G | Intron            | PTEN    |          | phosphatase and tensin      | 179 (0.01) | 12 (0.58)  | 0.80 |
| 11-01 | Gp3 | g.chr10:89698360G>C | Intron            | PTEN    |          | phosphatase and tensin      | 155 (0.00) | 27 (0.63)  | 0.86 |
| 11-01 | Gp3 | g.chr5:40692300C>A  | Silent            | PTGER4  | p.T429T  | prostaglandin E receptor    | 27 (0.00)  | 26 (0.31)  | 0.82 |



|       |     |                      |                   |        |          |                                         |           |      |
|-------|-----|----------------------|-------------------|--------|----------|-----------------------------------------|-----------|------|
| 11-01 | Gp3 | g.chr2:209353823G>T  | Missense Mutation | PTH2R  | p.G388V  | parathyroid hormone 2 r 19 (0.00)       | 22 (0.23) | 0.61 |
| 11-01 | Gp3 | g.chr1:32377301C>T   | Missense Mutation | PTP4A2 | p.G106R  | protein tyrosine phosphatase 33 (0.00)  | 23 (0.26) | 0.70 |
| 11-01 | Gp3 | g.chr9:96866587C>A   | Missense Mutation | PTPDC1 | p.H742N  | protein tyrosine phosphatase 44 (0.00)  | 39 (0.18) | 0.48 |
| 11-01 | Gp3 | g.chr7:77170376C>A   | Intron            | PTPN12 |          | protein tyrosine phosphatase 72 (0.00)  | 48 (0.17) | 0.44 |
| 11-01 | Gp3 | g.chr7:77174591C>A   | Intron            | PTPN12 |          | protein tyrosine phosphatase 51 (0.00)  | 50 (0.36) | 0.96 |
| 11-01 | Gp3 | g.chr7:77176791G>A   | Intron            | PTPN12 |          | protein tyrosine phosphatase 58 (0.00)  | 60 (0.15) | 0.40 |
| 11-01 | Gp3 | g.chr7:77180656G>A   | Intron            | PTPN12 |          | protein tyrosine phosphatase 37 (0.00)  | 24 (0.33) | 0.89 |
| 11-01 | Gp3 | g.chr7:77186727C>T   | Intron            | PTPN12 |          | protein tyrosine phosphatase 124 (0.00) | 63 (0.14) | 0.38 |
| 11-01 | Gp3 | g.chr7:77186744C>A   | Intron            | PTPN12 |          | protein tyrosine phosphatase 70 (0.00)  | 23 (0.35) | 0.93 |
| 11-01 | Gp3 | g.chr7:77193778G>A   | Intron            | PTPN12 |          | protein tyrosine phosphatase 28 (0.00)  | 11 (0.45) | 1.21 |
| 11-01 | Gp3 | g.chr7:77206847C>A   | Intron            | PTPN12 |          | protein tyrosine phosphatase 90 (0.00)  | 40 (0.38) | 1.00 |
| 11-01 | Gp3 | g.chr7:77247479G>C   | Intron            | PTPN12 |          | protein tyrosine phosphatase 57 (0.00)  | 39 (0.26) | 0.68 |
| 11-01 | Gp3 | g.chr7:77260319G>A   | Intron            | PTPN12 |          | protein tyrosine phosphatase 57 (0.00)  | 39 (0.15) | 0.41 |
| 11-01 | Gp3 | g.chr4:87622897C>A   | Silent            | PTPN13 | p.R380R  | protein tyrosine phosphatase 59 (0.00)  | 35 (0.17) | 0.46 |
| 11-01 | Gp3 | g.chr4:87694111G>C   | Splice Site       | PTPN13 | p.L1788L | protein tyrosine phosphatase 21 (0.00)  | 12 (0.58) | 1.56 |
| 11-01 | Gp3 | g.chr4:87731062C>A   | Nonsense Mutation | PTPN13 | p.C2413* | protein tyrosine phosphatase 97 (0.00)  | 45 (0.24) | 0.65 |
| 11-01 | Gp3 | g.chr1:214588019C>T  | Missense Mutation | PTPN14 | p.R132Q  | protein tyrosine phosphatase 57 (0.00)  | 41 (0.41) | 1.11 |
| 11-01 | Gp3 | g.chr14:88951505C>A  | Splice Site       | PTPN21 |          | protein tyrosine phosphatase 44 (0.00)  | 38 (0.18) | 0.49 |
| 11-01 | Gp3 | g.chr1:114380392C>A  | Missense Mutation | PTPN22 | p.G544C  | protein tyrosine phosphatase 36 (0.00)  | 47 (0.15) | 0.40 |
| 11-01 | Gp3 | g.chr11:18755173C>A  | Missense Mutation | PTPN5  | p.S313I  | protein tyrosine phosphatase 24 (0.00)  | 16 (0.31) | 0.83 |
| 11-01 | Gp3 | g.chr12:7064613G>A   | Missense Mutation | PTPN6  | p.D238N  | protein tyrosine phosphatase 52 (0.00)  | 63 (0.19) | 0.51 |
| 11-01 | Gp3 | g.chr15:75763077C>A  | Missense Mutation | PTPN9  | p.G435C  | protein tyrosine phosphatase 105 (0.00) | 46 (0.20) | 0.52 |
| 11-01 | Gp3 | g.chr20:3003453C>G   | Missense Mutation | PTPRA  | p.Q474E  | protein tyrosine phosphatase 28 (0.00)  | 15 (0.47) | 1.24 |
| 11-01 | Gp3 | g.chr10:129854475C>G | Missense Mutation | PTPRE  | p.P170R  | protein tyrosine phosphatase 29 (0.00)  | 46 (0.35) | 0.93 |
| 11-01 | Gp3 | g.chr3:62142789C>T   | Missense Mutation | PTPRG  | p.A244V  | protein tyrosine phosphatase 91 (0.00)  | 29 (0.17) | 0.46 |
| 11-01 | Gp3 | g.chr11:48157787C>T  | Silent            | PTPRJ  | p.I604I  | protein tyrosine phosphatase 39 (0.00)  | 31 (0.23) | 0.60 |
| 11-01 | Gp3 | g.chr12:71286584G>A  | Missense Mutation | PTPRR  | p.H78Y   | protein tyrosine phosphatase 95 (0.00)  | 34 (0.44) | 1.18 |
| 11-01 | Gp3 | g.chr19:5208258C>A   | Missense Mutation | PTPRS  | p.V1878F | protein tyrosine phosphatase 22 (0.00)  | 34 (0.24) | 0.63 |
| 11-01 | Gp3 | g.chr20:40710634G>A  | Missense Mutation | PTPRT  | p.T1387I | protein tyrosine phosphatase 36 (0.00)  | 39 (0.44) | 1.16 |
| 11-01 | Gp3 | g.chr11:112103898C>G | Missense Mutation | PTS    | p.Q86E   | 6-pyruvoyltetrahydropterin 71 (0.00)    | 41 (0.22) | 0.59 |
| 11-01 | Gp3 | g.chr5:159849828C>A  | Missense Mutation | PTTG1  | p.N68K   | pituitary tumor-transforming 101 (0.00) | 85 (0.16) | 0.44 |
| 11-01 | Gp3 | g.chr11:125764109C>A | Missense Mutation | PUS3   | p.E339D  | pseudouridylate synthase 42 (0.00)      | 46 (0.15) | 0.41 |
| 11-01 | Gp3 | g.chr7:105148776G>T  | Missense Mutation | PUS7   | p.P62T   | pseudouridylate synthase 53 (0.00)      | 69 (0.22) | 0.58 |
| 11-01 | Gp3 | g.chr19:45153134G>A  | Missense Mutation | PVR    | p.V161M  | poliovirus receptor 36 (0.00)           | 32 (0.19) | 0.50 |
| 11-01 | Gp3 | g.chr6:36359607G>T   | Missense Mutation | PXT1   | p.F115L  | peroxisomal, testis specific 41 (0.00)  | 12 (0.50) | 1.33 |

|       |     |                      |                   |          |          |                                   |            |            |      |
|-------|-----|----------------------|-------------------|----------|----------|-----------------------------------|------------|------------|------|
| 11-01 | Gp3 | g.chr3:49136553G>A   | Missense Mutation | QARS     | p.P583L  | glutamyl-tRNA synthetase 1        | 41 (0.00)  | 32 (0.28)  | 0.75 |
| 11-01 | Gp3 | g.chr3:49094974G>T   | Missense Mutation | QRICH1   | p.S220Y  | glutamine-rich 1                  | 21 (0.00)  | 31 (0.16)  | 0.43 |
| 11-01 | Gp3 | g.chr11:32956112C>A  | Missense Mutation | QSER1    | p.S974Y  | glutamine and serine rich 1       | 71 (0.00)  | 45 (0.24)  | 0.65 |
| 11-01 | Gp3 | g.chr7:140111735G>T  | Missense Mutation | RAB19    | p.R88L   | RAB19, member RAS c21             | 21 (0.00)  | 13 (0.54)  | 1.44 |
| 11-01 | Gp3 | g.chr11:87882999G>A  | Silent            | RAB38    | p.D109D  | RAB38, member RAS c34             | 34 (0.00)  | 32 (0.22)  | 0.58 |
| 11-01 | Gp3 | g.chr1:52403066G>A   | Missense Mutation | RAB3B    | p.R83W   | RAB3B, member RAS c21             | 21 (0.00)  | 29 (0.52)  | 1.38 |
| 11-01 | Gp3 | g.chr17:5241354C>T   | Missense Mutation | RABEP1   | p.P190L  | rabaptin, RAB GTPase 139          | 139 (0.00) | 29 (0.34)  | 0.92 |
| 11-01 | Gp3 | g.chr9:125760961C>T  | Silent            | RABGAP1  | p.V430V  | RAB GTPase activating 82          | 82 (0.00)  | 108 (0.21) | 0.57 |
| 11-01 | Gp3 | g.chr2:114398999C>T  | Missense Mutation | RABL2A   | p.S159L  | RAB, member of RAS c325           | 325 (0.00) | 120 (0.21) | 0.56 |
| 11-01 | Gp3 | g.chr5:131925424C>T  | Silent            | RAD50    | p.I449I  | RAD50 homolog (S. cerevisiae)     | 38 (0.00)  | 33 (0.21)  | 0.57 |
| 11-01 | Gp3 | g.chr1:46725765T>A   | Missense Mutation | RAD54L   | p.L134H  | RAD54-like (S. cerevisiae)        | 33 (0.00)  | 59 (0.47)  | 1.27 |
| 11-01 | Gp3 | g.chr1:46733164T>A   | Missense Mutation | RAD54L   | p.Y309N  | RAD54-like (S. cerevisiae)        | 50 (0.00)  | 25 (0.28)  | 0.75 |
| 11-01 | Gp3 | g.chr1:46738149G>A   | Missense Mutation | RAD54L   | p.R394Q  | RAD54-like (S. cerevisiae)        | 86 (0.00)  | 48 (0.15)  | 0.39 |
| 11-01 | Gp3 | g.chr3:51667591A>G   | Splice Site       | RAD54L2  |          | RAD54-like 2 (S. cerevisiae)      | 24 (0.04)  | 33 (0.24)  | 0.65 |
| 11-01 | Gp3 | g.chr3:51673458G>C   | Silent            | RAD54L2  | p.L628L  | RAD54-like 2 (S. cerevisiae)      | 24 (0.00)  | 28 (0.54)  | 1.43 |
| 11-01 | Gp3 | g.chr3:51679084T>A   | Missense Mutation | RAD54L2  | p.V832E  | RAD54-like 2 (S. cerevisiae)      | 60 (0.00)  | 71 (0.14)  | 0.38 |
| 11-01 | Gp3 | g.chr12:110943421G>A | Splice Site       | RAD9B    |          | RAD9 homolog B (S. pombe)         | 24 (0.00)  | 30 (0.20)  | 0.53 |
| 11-01 | Gp3 | g.chr2:121036352G>A  | Missense Mutation | RALB     | p.E38K   | v-ral simian leukemia virus 55    | 55 (0.00)  | 31 (0.16)  | 0.43 |
| 11-01 | Gp3 | g.chr18:9517187G>C   | Missense Mutation | RALBP1   | p.A197P  | ralA binding protein 1            | 35 (0.00)  | 27 (0.19)  | 0.49 |
| 11-01 | Gp3 | g.chr18:9533721G>T   | Missense Mutation | RALBP1   | p.S533I  | ralA binding protein 1            | 61 (0.00)  | 55 (0.15)  | 0.39 |
| 11-01 | Gp3 | g.chr20:20563755C>T  | Silent            | RALGAPA2 | p.V882V  | Ral GTPase activating p97         | 97 (0.00)  | 35 (0.40)  | 1.07 |
| 11-01 | Gp3 | g.chr20:37191325G>A  | Missense Mutation | RALGAPB  | p.E1224K | Ral GTPase activating p31         | 31 (0.00)  | 20 (0.25)  | 0.67 |
| 11-01 | Gp3 | g.chr9:129961315T>C  | Missense Mutation | RALGPS1  | p.F406S  | Ral GEF with PH domain 15         | 15 (0.00)  | 17 (0.29)  | 0.78 |
| 11-01 | Gp3 | g.chr1:178852651C>A  | Missense Mutation | RALGPS2  | p.S296Y  | Ral GEF with PH domain 42         | 42 (0.00)  | 24 (0.21)  | 0.56 |
| 11-01 | Gp3 | g.chr20:32659995G>C  | Missense Mutation | RALY     | p.E39Q   | RALY heterogeneous nuclear        | 40 (0.00)  | 34 (0.21)  | 0.55 |
| 11-01 | Gp3 | g.chr8:85799931G>A   | Missense Mutation | RALYL    | p.E260K  | RALY RNA binding protein 136      | 136 (0.00) | 77 (0.13)  | 0.43 |
| 11-01 | Gp3 | g.chr7:45222905C>A   | Missense Mutation | RAMP3    | p.P114H  | receptor (G protein-coupled)      | 45 (0.00)  | 30 (0.27)  | 0.71 |
| 11-01 | Gp3 | g.chr22:20109945G>C  | Splice Site       | RANBP1   |          | RAN binding protein 1             | 25 (0.00)  | 26 (0.27)  | 0.72 |
| 11-01 | Gp3 | g.chr6:13639938C>A   | Missense Mutation | RANBP9   | p.R461L  | RAN binding protein 9             | 69 (0.00)  | 49 (0.16)  | 0.44 |
| 11-01 | Gp3 | g.chr1:21938240C>T   | Missense Mutation | RAP1GAP  | p.G228S  | RAP1 GTPase activating protein 38 | 38 (0.00)  | 41 (0.27)  | 0.72 |
| 11-01 | Gp3 | g.chr17:2901516T>C   | Splice Site       | RAP1GAP2 | p.L349P  | RAP1 GTPase activating protein 66 | 66 (0.00)  | 23 (0.30)  | 0.81 |
| 11-01 | Gp3 | g.chr9:134465363T>A  | Missense Mutation | RAPGEF1  | p.Y757F  | Rap guanine nucleotide 27         | 27 (0.00)  | 13 (0.69)  | 1.85 |
| 11-01 | Gp3 | g.chr4:160251103G>A  | Missense Mutation | RAPGEF2  | p.V254M  | Rap guanine nucleotide 55         | 55 (0.00)  | 22 (0.55)  | 1.45 |
| 11-01 | Gp3 | g.chr2:173885381T>A  | Missense Mutation | RAPGEF4  | p.F731I  | Rap guanine nucleotide 93         | 93 (0.00)  | 93 (0.16)  | 0.43 |
| 11-01 | Gp3 | g.chr7:22190104G>A   | Missense Mutation | RAPGEF5  | p.P299L  | Rap guanine nucleotide 118        | 118 (0.00) | 39 (0.18)  | 0.48 |

|       |     |                     |                   |          |          |                                                |            |      |
|-------|-----|---------------------|-------------------|----------|----------|------------------------------------------------|------------|------|
| 11-01 | Gp3 | g.chr17:38348926C>T | Silent            | RAPGEFL1 | p.F424F  | Rap guanine nucleotide 205 (0.00)              | 100 (0.33) | 0.88 |
| 11-01 | Gp3 | g.chr3:25638016G>T  | Missense Mutation | RARB     | p.S419I  | retinoic acid receptor, beta 111 (0.00)        | 71 (0.31)  | 0.83 |
| 11-01 | Gp3 | g.chr3:158415579G>A | Missense Mutation | RARRES1  | p.P258L  | retinoic acid receptor related 32 (0.00)       | 20 (0.55)  | 1.47 |
| 11-01 | Gp3 | g.chr6:88227897G>C  | Missense Mutation | RARS2    | p.H501D  | arginyl-tRNA synthetase 115 (0.00)             | 48 (0.29)  | 0.46 |
| 11-01 | Gp3 | g.chr22:35947596C>T | Silent            | RASD2    | p.F106F  | RASD family, member 20 (0.00)                  | 25 (0.20)  | 0.53 |
| 11-01 | Gp3 | g.chr4:82363478C>G  | Silent            | RASGEF1B | p.V327V  | RasGEF domain family, 43 (0.00)                | 26 (0.23)  | 0.62 |
| 11-01 | Gp3 | g.chr5:80419472T>A  | Missense Mutation | RASGRF2  | p.S828T  | Ras protein-specific guanine 41 (0.00)         | 25 (0.28)  | 0.75 |
| 11-01 | Gp3 | g.chr13:48982669A>G | Intron            | RB1      |          | retinoblastoma 1 65 (0.00)                     | 36 (0.36)  | 0.96 |
| 11-01 | Gp3 | g.chr13:48982954C>T | Intron            | RB1      |          | retinoblastoma 1 15 (0.00)                     | 30 (0.27)  | 0.71 |
| 11-01 | Gp3 | g.chr13:49003114G>A | Intron            | RB1      |          | retinoblastoma 1 53 (0.00)                     | 49 (0.14)  | 0.38 |
| 11-01 | Gp3 | g.chr13:49009323G>A | Intron            | RB1      |          | retinoblastoma 1 41 (0.00)                     | 19 (0.42)  | 1.12 |
| 11-01 | Gp3 | g.chr13:49026878C>T | Intron            | RB1      |          | retinoblastoma 1 39 (0.00)                     | 34 (0.26)  | 0.71 |
| 11-01 | Gp3 | g.chr13:49028641G>A | Intron            | RB1      |          | retinoblastoma 1 88 (0.00)                     | 68 (0.16)  | 0.43 |
| 11-01 | Gp3 | g.chr8:53540715C>A  | Missense Mutation | RB1CC1   | p.D1505Y | RB1-inducible coiled-coil 16 (0.00)            | 14 (0.50)  | 1.67 |
| 11-01 | Gp3 | g.chr20:18470621G>A | Silent            | RBBP9    | p.R116R  | retinoblastoma binding protein 24 (0.00)       | 26 (0.54)  | 1.44 |
| 11-01 | Gp3 | g.chr16:7568190G>T  | Missense Mutation | RBFOX1   | p.Q59H   | RNA binding protein, family 82 (0.00)          | 98 (0.14)  | 0.38 |
| 11-01 | Gp3 | g.chr7:127977191C>G | Missense Mutation | RBM28    | p.A203P  | RNA binding motif protein 24 (0.00)            | 11 (0.64)  | 1.70 |
| 11-01 | Gp3 | g.chr7:155567697G>T | Missense Mutation | RBM33    | p.D1159Y | RNA binding motif protein 50 (0.00)            | 55 (0.18)  | 0.48 |
| 11-01 | Gp3 | g.chr4:155720400G>A | Silent            | RBM46    | p.P362P  | RNA binding motif protein 52 (0.00)            | 35 (0.17)  | 0.46 |
| 11-01 | Gp3 | g.chr12:7280952G>T  | Missense Mutation | RBP5     | p.Q46K   | retinol binding protein 5 24 (0.00)            | 29 (0.17)  | 0.46 |
| 11-01 | Gp3 | g.chr4:26422283C>A  | Silent            | RBPJ     | p.L143L  | recombination signal binding protein 29 (0.00) | 12 (0.50)  | 1.33 |
| 11-01 | Gp3 | g.chr1:173921211G>A | Silent            | RC3H1    | p.P812P  | ring finger and CCCH-type 26 (0.00)            | 11 (0.45)  | 1.21 |
| 11-01 | Gp3 | g.chr1:173939703C>A | Missense Mutation | RC3H1    | p.R425I  | ring finger and CCCH-type 39 (0.00)            | 28 (0.21)  | 0.57 |
| 11-01 | Gp3 | g.chr9:125622331G>A | Silent            | RC3H2    | p.L572L  | ring finger and CCCH-type 105 (0.01)           | 112 (0.28) | 0.74 |
| 11-01 | Gp3 | g.chr9:125622370C>A | Missense Mutation | RC3H2    | p.A559S  | ring finger and CCCH-type 71 (0.00)            | 73 (0.15)  | 0.40 |
| 11-01 | Gp3 | g.chr13:49070381G>A | Silent            | RCBTB2   | p.I487I  | regulator of chromosome 32 (0.00)              | 24 (0.25)  | 0.67 |
| 11-01 | Gp3 | g.chr13:49070390C>A | Missense Mutation | RCBTB2   | p.K484N  | regulator of chromosome 29 (0.00)              | 23 (0.26)  | 0.70 |
| 11-01 | Gp3 | g.chr11:63682198C>G | Missense Mutation | RCOR2    | p.V137L  | REST corepressor 2 98 (0.01)                   | 67 (0.39)  | 1.03 |
| 11-01 | Gp3 | g.chr2:18736733C>A  | Missense Mutation | RDH14    | p.L245F  | retinol dehydrogenase 1 75 (0.00)              | 39 (0.18)  | 0.48 |
| 11-01 | Gp3 | g.chr7:103197536C>T | Missense Mutation | RELN     | p.M1895I | reelin 24 (0.00)                               | 22 (0.32)  | 0.85 |
| 11-01 | Gp3 | g.chr7:103214648C>T | Missense Mutation | RELN     | p.A1468T | reelin 69 (0.00)                               | 28 (0.18)  | 0.48 |
| 11-01 | Gp3 | g.chr4:57797423C>T  | Missense Mutation | REST     | p.P800L  | RE1-silencing transcript 92 (0.00)             | 33 (0.15)  | 0.40 |
| 11-01 | Gp3 | g.chr1:151315845G>C | Silent            | RFX5     | p.A277A  | regulatory factor X, 5 (intron) 44 (0.00)      | 23 (0.22)  | 0.58 |
| 11-01 | Gp3 | g.chr15:56387853G>A | Silent            | RFX7     | p.G594G  | regulatory factor X, 7 155 (0.00)              | 86 (0.20)  | 0.53 |
| 11-01 | Gp3 | g.chr19:19308988G>A | Missense Mutation | RFXANK   | p.D171N  | regulatory factor X-associated 25 (0.00)       | 29 (0.34)  | 0.92 |

|       |     |                      |                   |         |          |                           |            |            |      |
|-------|-----|----------------------|-------------------|---------|----------|---------------------------|------------|------------|------|
| 11-01 | Gp3 | g.chr13:42041015C>A  | Missense Mutation | RGCC    | p.P98T   | regulator of cell cycle   | 80 (0.01)  | 91 (0.15)  | 0.41 |
| 11-01 | Gp3 | g.chr2:108476215C>T  | Missense Mutation | RGPD4   | p.H558Y  | RANBP2-like and GRIF      | 82 (0.00)  | 37 (0.22)  | 0.58 |
| 11-01 | Gp3 | g.chr10:86014161C>A  | Missense Mutation | RGR     | p.L202I  | retinal G protein couple  | 77 (0.00)  | 22 (0.23)  | 0.61 |
| 11-01 | Gp3 | g.chr4:3318590C>T    | Silent            | RGS12   | p.I231I  | regulator of G-protein si | 80 (0.00)  | 25 (0.32)  | 0.85 |
| 11-01 | Gp3 | g.chr1:163042289G>T  | Splice Site       | RGS4    | p.R50I   | regulator of G-protein si | 76 (0.00)  | 70 (0.20)  | 0.53 |
| 11-01 | Gp3 | g.chr1:163044236C>T  | Silent            | RGS4    | p.F168F  | regulator of G-protein si | 101 (0.00) | 91 (0.46)  | 1.23 |
| 11-01 | Gp3 | g.chr16:109806C>T    | Missense Mutation | RHBDF1  | p.A581T  | rhomboid 5 homolog 1      | 27 (0.00)  | 23 (0.22)  | 0.58 |
| 11-01 | Gp3 | g.chr16:110440G>T    | Missense Mutation | RHBDF1  | p.P552H  | rhomboid 5 homolog 1      | 22 (0.00)  | 17 (0.35)  | 0.94 |
| 11-01 | Gp3 | g.chr15:90020037G>T  | Missense Mutation | RHCG    | p.F420L  | Rh family, C glycoprote   | 36 (0.00)  | 26 (0.19)  | 0.51 |
| 11-01 | Gp3 | g.chr2:20647562C>A   | Silent            | RHOB    | p.I112I  | ras homolog family mer    | 15 (0.00)  | 30 (0.17)  | 0.44 |
| 11-01 | Gp3 | g.chr14:63749897C>T  | Missense Mutation | RHOJ    | p.P154L  | ras homolog family mer    | 73 (0.00)  | 57 (0.18)  | 0.47 |
| 11-01 | Gp3 | g.chr17:30538135C>A  | Splice Site       | RHOT1   | p.F612L  | ras homolog family mer    | 120 (0.00) | 67 (0.34)  | 0.92 |
| 11-01 | Gp3 | g.chr1:228879131G>C  | Missense Mutation | RHOU    | p.E141Q  | ras homolog family mer    | 99 (0.00)  | 93 (0.16)  | 0.43 |
| 11-01 | Gp3 | g.chr22:45818184G>C  | Missense Mutation | RIBC2   | p.E118Q  | RIB43A domain with cc     | 115 (0.00) | 67 (0.21)  | 0.56 |
| 11-01 | Gp3 | g.chr22:45818253G>C  | Missense Mutation | RIBC2   | p.V141L  | RIB43A domain with cc     | 152 (0.00) | 100 (0.16) | 0.43 |
| 11-01 | Gp3 | g.chr12:130927013G>A | Missense Mutation | RIMBP2  | p.T278I  | RIMS binding protein 2    | 28 (0.00)  | 40 (0.17)  | 0.47 |
| 11-01 | Gp3 | g.chr22:21742765G>T  | Missense Mutation | RIMBP3B | p.V1540L | RIMS binding protein 3    | 64 (0.02)  | 26 (0.23)  | 0.62 |
| 11-01 | Gp3 | g.chr6:73023229G>A   | Silent            | RIMS1   | p.Q1328Q | regulating synaptic men   | 34 (0.00)  | 37 (0.30)  | 0.79 |
| 11-01 | Gp3 | g.chr7:105190920G>A  | Silent            | RINT1   | p.T440T  | RAD50 interactor 1        | 76 (0.00)  | 70 (0.14)  | 0.38 |
| 11-01 | Gp3 | g.chr6:3083435C>A    | Nonsense Mutation | RIPK1   | p.Y192*  | receptor (TNFRSF)-inte    | 78 (0.01)  | 45 (0.18)  | 0.47 |
| 11-01 | Gp3 | g.chr14:24807744C>A  | Missense Mutation | RIPK3   | p.Q167H  | receptor-interacting seri | 30 (0.00)  | 10 (0.60)  | 1.60 |
| 11-01 | Gp3 | g.chr1:40703828C>A   | Missense Mutation | RLF     | p.H1152N | rearranged L-myc fusio    | 40 (0.00)  | 23 (0.48)  | 1.28 |
| 11-01 | Gp3 | g.chr1:40705706C>T   | Nonsense Mutation | RLF     | p.Q1778* | rearranged L-myc fusio    | 19 (0.00)  | 44 (0.48)  | 1.27 |
| 11-01 | Gp3 | g.chr15:41029891C>G  | Missense Mutation | RMDN3   | p.A387P  | regulator of microtubule  | 29 (0.00)  | 24 (0.29)  | 0.78 |
| 11-01 | Gp3 | g.chr14:21052184G>T  | Missense Mutation | RNASE11 | p.S150R  | ribonuclease, RNase A     | 159 (0.00) | 32 (0.22)  | 0.58 |
| 11-01 | Gp3 | g.chr14:21250221G>A  | Silent            | RNASE6  | p.Q121Q  | ribonuclease, RNase A     | 178 (0.00) | 66 (0.15)  | 0.40 |
| 11-01 | Gp3 | g.chr3:49740131G>T   | Silent            | RNF123  | p.L565L  | ring finger protein 123   | 151 (0.00) | 131 (0.18) | 0.49 |
| 11-01 | Gp3 | g.chr5:179393906G>C  | Missense Mutation | RNF130  | p.N350K  | ring finger protein 130   | 65 (0.00)  | 38 (0.16)  | 0.42 |
| 11-01 | Gp3 | g.chr6:127608673G>A  | Silent            | RNF146  | p.Q304Q  | ring finger protein 146   | 85 (0.00)  | 20 (0.30)  | 0.47 |
| 11-01 | Gp3 | g.chr11:74546969C>A  | Silent            | RNF169  | p.R441R  | ring finger protein 169   | 25 (0.00)  | 14 (0.43)  | 1.14 |
| 11-01 | Gp3 | g.chr13:25352485G>A  | Missense Mutation | RNF17   | p.G124S  | ring finger protein 17    | 40 (0.00)  | 64 (0.27)  | 0.71 |
| 11-01 | Gp3 | g.chr8:101300201C>T  | Missense Mutation | RNF19A  | p.G68S   | ring finger protein 19A,  | 97 (0.00)  | 53 (0.17)  | 0.45 |
| 11-01 | Gp3 | g.chr17:78318709G>C  | Missense Mutation | RNF213  | p.G2241R | ring finger protein 213   | 42 (0.00)  | 27 (0.19)  | 0.49 |
| 11-01 | Gp3 | g.chr17:78319754C>A  | Nonsense Mutation | RNF213  | p.S2589* | ring finger protein 213   | 18 (0.00)  | 13 (0.69)  | 1.85 |
| 11-01 | Gp3 | g.chr17:78321522G>A  | Silent            | RNF213  | p.V3178V | ring finger protein 213   | 44 (0.00)  | 31 (0.19)  | 0.52 |

|       |     |                      |                   |                |          |                                |            |            |      |
|-------|-----|----------------------|-------------------|----------------|----------|--------------------------------|------------|------------|------|
| 11-01 | Gp3 | g.chr17:78321687G>A  | Silent            | RNF213         | p.Q3233Q | ring finger protein 213        | 34 (0.00)  | 28 (0.18)  | 0.48 |
| 11-01 | Gp3 | g.chr17:78343330C>A  | Silent            | RNF213         | p.R4111R | ring finger protein 213        | 50 (0.00)  | 43 (0.30)  | 0.81 |
| 11-01 | Gp3 | g.chr17:78360091G>C  | Missense Mutation | RNF213         | p.D4910H | ring finger protein 213        | 103 (0.00) | 59 (0.32)  | 0.86 |
| 11-01 | Gp3 | g.chr7:5780768G>C    | Missense Mutation | RNF216         | p.H294D  | ring finger protein 216        | 22 (0.00)  | 13 (0.38)  | 1.03 |
| 11-01 | Gp3 | g.chr7:5781384C>T    | Silent            | RNF216         | p.L88L   | ring finger protein 216        | 109 (0.00) | 72 (0.24)  | 0.63 |
| 11-01 | Gp3 | g.chr12:121858429C>A | Nonsense Mutation | RNF34          | p.S259*  | ring finger protein 34, E53    | 0.00       | 23 (0.22)  | 0.58 |
| 11-01 | Gp3 | g.chr17:56438228G>C  | Silent            | RNF43          | p.A255A  | ring finger protein 43         | 19 (0.00)  | 21 (0.24)  | 0.63 |
| 11-01 | Gp3 | g.chr11:498017G>C    | Missense Mutation | RNH1           | p.L361V  | ribonuclease/angiogenin21      | 0.00       | 29 (0.21)  | 0.55 |
| 11-01 | Gp3 | g.chr3:78685113C>G   | Silent            | ROBO1          | p.G1061G | roundabout, axon guidance      | 137 (0.00) | 50 (0.16)  | 0.43 |
| 11-01 | Gp3 | g.chr1:151801912G>T  | Silent            | RORC           | p.T21T   | RAR-related orphan receptor 21 | 0.00       | 16 (0.31)  | 0.83 |
| 11-01 | Gp3 | g.chr8:55534130G>A   | Missense Mutation | RP1            | p.D202N  | retinitis pigmentosa 1 (a29)   | 0.00       | 38 (0.29)  | 0.97 |
| 11-01 | Gp3 | g.chr8:55539440G>T   | Missense Mutation | RP1            | p.G1000C | retinitis pigmentosa 1 (a117)  | 0.01       | 93 (0.16)  | 0.54 |
| 11-01 | Gp3 | g.chr8:55541789G>A   | Missense Mutation | RP1            | p.V1783I | retinitis pigmentosa 1 (a41)   | 0.00       | 39 (0.18)  | 0.60 |
| 11-01 | Gp3 | g.chr6:85140387G>A   | lincRNA           | RP1-90L14.1    |          |                                | 62 (0.00)  | 46 (0.15)  | 0.41 |
| 11-01 | Gp3 | g.chr6:85140425C>T   | lincRNA           | RP1-90L14.1    |          |                                | 49 (0.00)  | 29 (0.17)  | 0.46 |
| 11-01 | Gp3 | g.chr15:72905283C>A  | lincRNA           | RP11-1006G14.2 |          |                                | 20 (0.00)  | 11 (0.55)  | 1.45 |
| 11-01 | Gp3 | g.chr12:57689283G>A  | Nonsense Mutation | RP11-123K3.4   | p.Q28*   |                                | 127 (0.00) | 111 (0.26) | 0.70 |
| 11-01 | Gp3 | g.chr17:45128035G>A  | RNA               | RP11-156P1.3   |          |                                | 91 (0.00)  | 41 (0.24)  | 0.65 |
| 11-01 | Gp3 | g.chr19:23445102G>T  | RNA               | RP11-15H20.6   |          |                                | 68 (0.00)  | 35 (0.31)  | 0.84 |
| 11-01 | Gp3 | g.chr3:149768893G>A  | RNA               | RP11-167H9.4   |          |                                | 27 (0.00)  | 37 (0.16)  | 0.43 |
| 11-01 | Gp3 | g.chr13:47033250C>T  | lincRNA           | RP11-189B4.6   |          |                                | 89 (0.00)  | 34 (0.53)  | 1.41 |
| 11-01 | Gp3 | g.chr7:128109067G>A  | RNA               | RP11-212P7.3   |          |                                | 76 (0.00)  | 30 (0.43)  | 1.16 |
| 11-01 | Gp3 | g.chr3:101713471G>A  | lincRNA           | RP11-221J22.1  |          |                                | 38 (0.00)  | 31 (0.35)  | 0.95 |
| 11-01 | Gp3 | g.chr3:70300929G>C   | RNA               | RP11-231I13.2  |          |                                | 58 (0.00)  | 32 (0.19)  | 0.50 |
| 11-01 | Gp3 | g.chrX:115828035G>A  | lincRNA           | RP11-232D9.3   |          |                                | 24 (0.00)  | 19 (0.42)  | 0.70 |
| 11-01 | Gp3 | g.chr15:76072686A>G  | RNA               | RP11-24M17.5   |          |                                | 25 (0.00)  | 21 (0.62)  | 1.65 |
| 11-01 | Gp3 | g.chr15:76073158G>T  | RNA               | RP11-24M17.5   |          |                                | 38 (0.00)  | 16 (0.38)  | 1.00 |
| 11-01 | Gp3 | g.chr15:76074731G>A  | RNA               | RP11-24M17.5   |          |                                | 99 (0.00)  | 64 (0.17)  | 0.46 |
| 11-01 | Gp3 | g.chr16:74382979C>T  | RNA               | RP11-252A24.2  |          |                                | 74 (0.00)  | 31 (0.19)  | 0.52 |
| 11-01 | Gp3 | g.chr7:128220161C>A  | RNA               | RP11-274B21.1  |          |                                | 24 (0.00)  | 15 (0.60)  | 1.60 |
| 11-01 | Gp3 | g.chr13:24860997G>T  | Missense Mutation | RP11-307N16    | p.C737F  |                                | 50 (0.00)  | 37 (0.16)  | 0.43 |
| 11-01 | Gp3 | g.chr13:24871578C>T  | Silent            | RP11-307N16    | p.S974S  |                                | 59 (0.02)  | 24 (0.21)  | 0.56 |
| 11-01 | Gp3 | g.chr9:105966994C>G  | lincRNA           | RP11-341A22.2  |          |                                | 43 (0.00)  | 42 (0.14)  | 0.38 |
| 11-01 | Gp3 | g.chr10:28725848G>A  | lincRNA           | RP11-351M16.3  |          |                                | 86 (0.00)  | 54 (0.15)  | 0.40 |
| 11-01 | Gp3 | g.chr16:22574786T>A  | RNA               | RP11-368J21.3  |          |                                | 64 (0.00)  | 31 (0.42)  | 1.12 |

|       |     |                      |                   |                      |         |                           |            |            |      |
|-------|-----|----------------------|-------------------|----------------------|---------|---------------------------|------------|------------|------|
| 11-01 | Gp3 | g.chr9:84547797C>A   | lincRNA           | RP11-383M4.6         |         |                           | 22 (0.00)  | 14 (0.43)  | 1.14 |
| 11-01 | Gp3 | g.chr12:20095272G>A  | lincRNA           | RP11-405A12.2        |         |                           | 32 (0.00)  | 38 (0.18)  | 0.49 |
| 11-01 | Gp3 | g.chr1:83920447C>G   | lincRNA           | RP11-413G15.1        |         |                           | 108 (0.00) | 30 (0.17)  | 0.44 |
| 11-01 | Gp3 | g.chr2:96191452G>A   | lincRNA           | RP11-440D17.3        |         |                           | 16 (0.00)  | 19 (0.32)  | 0.84 |
| 11-01 | Gp3 | g.chr14:24518610G>A  | RNA               | RP11-468E2.9         |         |                           | 16 (0.00)  | 15 (0.33)  | 0.89 |
| 11-01 | Gp3 | g.chr10:52388587G>A  | RNA               | RP11-50E11.3         |         |                           | 48 (0.00)  | 32 (0.25)  | 0.67 |
| 11-01 | Gp3 | g.chr17:60374210G>T  | RNA               | RP11-51L5.5          |         |                           | 21 (0.00)  | 13 (0.38)  | 1.03 |
| 11-01 | Gp3 | g.chr17:42000158G>T  | RNA               | RP11-527L4.5         |         |                           | 213 (0.00) | 90 (0.17)  | 0.44 |
| 11-01 | Gp3 | g.chr17:42000167G>T  | RNA               | RP11-527L4.5         |         |                           | 216 (0.00) | 92 (0.15)  | 0.41 |
| 11-01 | Gp3 | g.chr12:31265976C>A  | RNA               | RP11-551L14.1        |         |                           | 47 (0.00)  | 27 (0.22)  | 0.59 |
| 11-01 | Gp3 | g.chr6:75115397C>T   | lincRNA           | RP11-554D15.1        |         |                           | 17 (0.00)  | 11 (0.45)  | 1.21 |
| 11-01 | Gp3 | g.chr1:162351759C>A  | Missense Mutation | RP11-565P22.1p.S132Y |         |                           | 24 (0.00)  | 15 (0.40)  | 1.07 |
| 11-01 | Gp3 | g.chr4:159199306G>A  | RNA               | RP11-597D13.7        |         |                           | 21 (0.00)  | 13 (0.38)  | 1.03 |
| 11-01 | Gp3 | g.chr5:89538131G>C   | RNA               | RP11-61G23.1         |         |                           | 16 (0.00)  | 21 (0.38)  | 1.02 |
| 11-01 | Gp3 | g.chr12:104309589G>A | RNA               | RP11-642P15.1        |         |                           | 81 (0.00)  | 45 (0.42)  | 1.13 |
| 11-01 | Gp3 | g.chr12:104309661G>A | RNA               | RP11-642P15.1        |         |                           | 71 (0.01)  | 43 (0.49)  | 1.30 |
| 11-01 | Gp3 | g.chr12:90313412G>T  | lincRNA           | RP11-654D12.2        |         |                           | 52 (0.00)  | 42 (0.17)  | 0.44 |
| 11-01 | Gp3 | g.chr11:82516608G>T  | lincRNA           | RP11-718B12.2        |         |                           | 37 (0.00)  | 33 (0.15)  | 0.40 |
| 11-01 | Gp3 | g.chr11:82517018G>C  | lincRNA           | RP11-718B12.2        |         |                           | 52 (0.00)  | 33 (0.15)  | 0.40 |
| 11-01 | Gp3 | g.chr3:128634309G>T  | Missense Mutation | RP11-723O4.6p.S473Y  |         |                           | 55 (0.00)  | 33 (0.18)  | 0.48 |
| 11-01 | Gp3 | g.chr4:171278500A>G  | lincRNA           | RP11-789C1.2         |         |                           | 18 (0.00)  | 15 (0.33)  | 0.89 |
| 11-01 | Gp3 | g.chr17:43627078C>T  | lincRNA           | RP11-798G7.6         |         |                           | 302 (0.00) | 114 (0.18) | 0.49 |
| 11-01 | Gp3 | g.chr14:21388065C>A  | lincRNA           | RP11-84C10.3         |         |                           | 96 (0.00)  | 79 (0.27)  | 0.71 |
| 11-01 | Gp3 | g.chr10:27535744G>A  | lincRNA           | RP11-85G18.6         |         |                           | 52 (0.00)  | 80 (0.19)  | 0.50 |
| 11-01 | Gp3 | g.chr10:27539647C>A  | lincRNA           | RP11-85G18.6         |         |                           | 122 (0.00) | 47 (0.23)  | 0.62 |
| 11-01 | Gp3 | g.chr1:19213006C>G   | Splice Site       | RP13-279N23.2        |         |                           | 21 (0.00)  | 13 (0.38)  | 1.03 |
| 11-01 | Gp3 | g.chr1:87104673C>T   | RNA               | RP4-651E10.4         |         |                           | 24 (0.00)  | 22 (0.45)  | 1.21 |
| 11-01 | Gp3 | g.chr20:21142502G>T  | RNA               | RP4-777D9.2          |         |                           | 48 (0.00)  | 23 (0.26)  | 0.70 |
| 11-01 | Gp3 | g.chr20:21142632G>T  | RNA               | RP4-777D9.2          |         |                           | 50 (0.00)  | 75 (0.16)  | 0.43 |
| 11-01 | Gp3 | g.chr20:22381239C>G  | lincRNA           | RP5-1004I9.1         |         |                           | 33 (0.00)  | 26 (0.38)  | 1.03 |
| 11-01 | Gp3 | g.chr16:72762501C>T  | RNA               | RP5-991G20.1         |         |                           | 21 (0.00)  | 19 (0.26)  | 0.70 |
| 11-01 | Gp3 | g.chr14:47120455C>T  | Missense Mutation | RPL10L               | p.R162H | ribosomal protein L10-l1  | 78 (0.00)  | 77 (0.18)  | 0.48 |
| 11-01 | Gp3 | g.chr17:41150800G>T  | Silent            | RPL27                | p.V11V  | ribosomal protein L27     | 55 (0.00)  | 60 (0.15)  | 0.40 |
| 11-01 | Gp3 | g.chr15:71089232G>A  | RNA               | RPL29P30             |         | ribosomal protein L29 p47 | 47 (0.00)  | 41 (0.22)  | 0.59 |
| 11-01 | Gp3 | g.chr3:197678079C>A  | Missense Mutation | RPL35A               | p.Q21K  | ribosomal protein L35a    | 50 (0.00)  | 41 (0.17)  | 0.46 |

|       |     |                     |                   |         |          |                           |            |            |      |
|-------|-----|---------------------|-------------------|---------|----------|---------------------------|------------|------------|------|
| 11-01 | Gp3 | g.chr3:197678083G>A | Missense Mutation | RPL35A  | p.R22K   | ribosomal protein L35a    | 52 (0.00)  | 41 (0.17)  | 0.46 |
| 11-01 | Gp3 | g.chr3:134070786G>A | RNA               | RPL39P5 |          | ribosomal protein L39 p27 | 33 (0.00)  | 33 (0.18)  | 0.48 |
| 11-01 | Gp3 | g.chr6:4996615T>A   | Missense Mutation | RPP40   | p.Y177F  | ribonuclease P/MRP 40162  | 21 (0.00)  | 21 (0.24)  | 0.63 |
| 11-01 | Gp3 | g.chr20:36718262G>C | Silent            | RPRD1B  | p.L322L  | regulation of nuclear pre | 114 (0.00) | 110 (0.15) | 0.41 |
| 11-01 | Gp3 | g.chr1:150443068G>T | Silent            | RPRD2   | p.G548G  | regulation of nuclear pre | 71 (0.00)  | 45 (0.16)  | 0.41 |
| 11-01 | Gp3 | g.chr1:150443342G>C | Missense Mutation | RPRD2   | p.A640P  | regulation of nuclear pre | 55 (0.00)  | 24 (0.21)  | 0.56 |
| 11-01 | Gp3 | g.chr1:150444380G>A | Missense Mutation | RPRD2   | p.G986S  | regulation of nuclear pre | 191 (0.00) | 110 (0.23) | 0.61 |
| 11-01 | Gp3 | g.chr1:150444520G>A | Silent            | RPRD2   | p.K1032K | regulation of nuclear pre | 138 (0.00) | 134 (0.29) | 0.78 |
| 11-01 | Gp3 | g.chr14:91444717C>A | Missense Mutation | RPS6KA5 | p.R109S  | ribosomal protein S6 kir  | 103 (0.00) | 107 (0.18) | 0.47 |
| 11-01 | Gp3 | g.chr1:152127922G>C | Missense Mutation | RPTN    | p.D551E  | repetin                   | 191 (0.00) | 133 (0.14) | 0.38 |
| 11-01 | Gp3 | g.chr1:152129238A>T | Missense Mutation | RPTN    | p.F113I  | repetin                   | 142 (0.01) | 74 (0.20)  | 0.54 |
| 11-01 | Gp3 | g.chr1:152129243C>T | Missense Mutation | RPTN    | p.C111Y  | repetin                   | 139 (0.01) | 73 (0.21)  | 0.55 |
| 11-01 | Gp3 | g.chr17:78857678G>T | Missense Mutation | RPTOR   | p.R583M  | regulatory associated pr  | 18 (0.00)  | 36 (0.17)  | 0.44 |
| 11-01 | Gp3 | g.chr1:39311722C>T  | Missense Mutation | RRAGC   | p.E313K  | Ras-related GTP binding   | 43 (0.00)  | 23 (0.22)  | 0.58 |
| 11-01 | Gp3 | g.chr11:4142932C>T  | Silent            | RRM1    | p.A325A  | ribonucleotide reductase  | 56 (0.00)  | 41 (0.22)  | 0.59 |
| 11-01 | Gp3 | g.chr2:10267028C>A  | Missense Mutation | RRM2    | p.T199K  | ribonucleotide reductase  | 44 (0.00)  | 47 (0.21)  | 0.57 |
| 11-01 | Gp3 | g.chr10:99160176C>A | Silent            | RRP12   | p.L85L   | ribosomal RNA process     | 37 (0.00)  | 26 (0.31)  | 0.82 |
| 11-01 | Gp3 | g.chr8:109001311G>A | Nonsense Mutation | RSPO2   | p.R86*   | R-spondin 2               | 27 (0.00)  | 32 (0.16)  | 0.42 |
| 11-01 | Gp3 | g.chr10:16806412C>A | Missense Mutation | RSU1    | p.Q86H   | Ras suppressor protein    | 193 (0.00) | 27 (0.26)  | 0.69 |
| 11-01 | Gp3 | g.chr3:187416420C>G | Missense Mutation | RTP2    | p.E182Q  | receptor (chemosensory    | 56 (0.00)  | 35 (0.14)  | 0.38 |
| 11-01 | Gp3 | g.chr18:67697314C>A | Missense Mutation | RTTN    | p.M1893I | rotatin                   | 45 (0.00)  | 57 (0.44)  | 1.17 |
| 11-01 | Gp3 | g.chr18:67733080G>A | Nonsense Mutation | RTTN    | p.Q1578* | rotatin                   | 48 (0.00)  | 25 (0.24)  | 0.64 |
| 11-01 | Gp3 | g.chr18:67741222C>A | Missense Mutation | RTTN    | p.D1525Y | rotatin                   | 30 (0.00)  | 34 (0.41)  | 1.10 |
| 11-01 | Gp3 | g.chr10:70136620C>G | Missense Mutation | RUFY2   | p.E439Q  | RUN and FYVE domain       | 30 (0.00)  | 47 (0.21)  | 0.57 |
| 11-01 | Gp3 | g.chr4:71588327C>T  | Missense Mutation | RUFY3   | p.P13S   | RUN and FYVE domain       | 96 (0.00)  | 49 (0.18)  | 0.49 |
| 11-01 | Gp3 | g.chr8:93027024G>A  | Missense Mutation | RUNX1T1 | p.P84L   | runt-related transcriptio | 17 (0.00)  | 25 (0.24)  | 0.80 |
| 11-01 | Gp3 | g.chr9:35560097G>T  | Nonsense Mutation | RUSC2   | p.E1154* | RUN and SH3 domain c      | 104 (0.01) | 97 (0.29)  | 0.77 |
| 11-01 | Gp3 | g.chr3:127816246G>T | Missense Mutation | RUVBL1  | p.H245N  | RuvB-like AAA ATPase      | 15 (0.00)  | 10 (0.90)  | 2.40 |
| 11-01 | Gp3 | g.chr3:72431459G>A  | Intron            | RYBP    |          | RING1 and YY1 binding     | 56 (0.00)  | 13 (0.38)  | 1.03 |
| 11-01 | Gp3 | g.chr3:72433016C>T  | Intron            | RYBP    |          | RING1 and YY1 binding     | 41 (0.00)  | 22 (0.32)  | 0.85 |
| 11-01 | Gp3 | g.chr3:72435351C>G  | Intron            | RYBP    |          | RING1 and YY1 binding     | 46 (0.00)  | 53 (0.15)  | 0.40 |
| 11-01 | Gp3 | g.chr3:72448187G>T  | Intron            | RYBP    |          | RING1 and YY1 binding     | 54 (0.00)  | 40 (0.17)  | 0.47 |
| 11-01 | Gp3 | g.chr3:72452244C>T  | Intron            | RYBP    |          | RING1 and YY1 binding     | 74 (0.00)  | 30 (0.17)  | 0.44 |
| 11-01 | Gp3 | g.chr3:72489335C>G  | Intron            | RYBP    |          | RING1 and YY1 binding     | 59 (0.00)  | 32 (0.44)  | 1.17 |
| 11-01 | Gp3 | g.chr19:39013898G>T | Missense Mutation | RYR1    | p.E3463D | ryanodine receptor 1 (sk  | 28 (0.00)  | 44 (0.50)  | 1.33 |

|       |     |                      |                   |        |          |                                     |           |      |
|-------|-----|----------------------|-------------------|--------|----------|-------------------------------------|-----------|------|
| 11-01 | Gp3 | g.chr19:39051877G>T  | Missense Mutation | RYR1   | p.R4136L | ryanodine receptor 1 (sk25 (0.00)   | 32 (0.19) | 0.50 |
| 11-01 | Gp3 | g.chr1:237789064G>A  | Silent            | RYR2   | p.K2042K | ryanodine receptor 2 (ca34 (0.00)   | 21 (0.52) | 0.99 |
| 11-01 | Gp3 | g.chr1:237813372G>A  | Missense Mutation | RYR2   | p.E2570K | ryanodine receptor 2 (ca113 (0.00)  | 42 (0.24) | 0.45 |
| 11-01 | Gp3 | g.chr15:33840353G>A  | Missense Mutation | RYR3   | p.G255R  | ryanodine receptor 3 23 (0.00)      | 30 (0.20) | 0.53 |
| 11-01 | Gp3 | g.chr15:34032126G>A  | Missense Mutation | RYR3   | p.A2584T | ryanodine receptor 3 92 (0.00)      | 40 (0.17) | 0.47 |
| 11-01 | Gp3 | g.chr15:34077877G>C  | Missense Mutation | RYR3   | p.D3095H | ryanodine receptor 3 40 (0.00)      | 31 (0.16) | 0.43 |
| 11-01 | Gp3 | g.chr4:6698677G>A    | Missense Mutation | S100P  | p.D66N   | S100 calcium binding p144 (0.00)    | 61 (0.31) | 0.83 |
| 11-01 | Gp3 | g.chr1:101704878C>G  | Missense Mutation | S1PR1  | p.T113S  | sphingosine-1-phosphat47 (0.00)     | 30 (0.20) | 0.53 |
| 11-01 | Gp3 | g.chr13:23905396C>T  | Missense Mutation | SACS   | p.V4207I | sacsin molecular chaper41 (0.00)    | 24 (0.25) | 0.67 |
| 11-01 | Gp3 | g.chr19:47653627G>A  | Missense Mutation | SAE1   | p.D127N  | SUMO1 activating enzy23 (0.00)      | 47 (0.15) | 0.40 |
| 11-01 | Gp3 | g.chr16:51173422G>T  | Nonsense Mutation | SALL1  | p.S904*  | spalt-like transcription f22 (0.00) | 15 (0.33) | 0.89 |
| 11-01 | Gp3 | g.chr14:77843865C>A  | Missense Mutation | SAMD15 | p.A35D   | sterile alpha motif doma27 (0.00)   | 32 (0.16) | 0.42 |
| 11-01 | Gp3 | g.chr22:44379873G>T  | Missense Mutation | SAMM50 | p.Q356H  | SAMM50 sorting and a:67 (0.00)      | 88 (0.38) | 1.00 |
| 11-01 | Gp3 | g.chr17:26715552G>A  | Silent            | SARM1  | p.V605V  | sterile alpha and TIR m:82 (0.00)   | 61 (0.57) | 1.53 |
| 11-01 | Gp3 | g.chr3:18436271G>A   | Missense Mutation | SATB1  | p.R297W  | SATB homeobox 1 67 (0.00)           | 45 (0.36) | 0.95 |
| 11-01 | Gp3 | g.chr14:51101994C>T  | Missense Mutation | SAV1   | p.M353I  | salvador family WW do79 (0.00)      | 63 (0.22) | 0.59 |
| 11-01 | Gp3 | g.chr6:39073255C>A   | Nonsense Mutation | SAYSD1 | p.E169*  | SAYSVFN motif domai64 (0.00)        | 23 (0.22) | 0.58 |
| 11-01 | Gp3 | g.chr11:9990036G>T   | Silent            | SBF2   | p.S484S  | SET binding factor 2 51 (0.02)      | 29 (0.21) | 0.55 |
| 11-01 | Gp3 | g.chr12:123829964G>C | Missense Mutation | SBNO1  | p.R131G  | strawberry notch homol:55 (0.00)    | 44 (0.16) | 0.42 |
| 11-01 | Gp3 | g.chr8:73993441C>A   | Silent            | SBSPON | p.P74P   | somatomedin B and thrc53 (0.00)     | 45 (0.13) | 0.44 |
| 11-01 | Gp3 | g.chr11:121174176C>A | Missense Mutation | SC5D   | p.A31D   | sterol-C5-desaturase 82 (0.00)      | 47 (0.17) | 0.45 |
| 11-01 | Gp3 | g.chr21:33068904G>C  | Missense Mutation | SCAF4  | p.P313A  | SR-related CTD-associa15 (0.00)     | 14 (0.50) | 1.33 |
| 11-01 | Gp3 | g.chr6:155154360G>A  | Missense Mutation | SCAF8  | p.G1216D | SR-related CTD-associa28 (0.00)     | 30 (0.17) | 0.44 |
| 11-01 | Gp3 | g.chr15:76673884C>A  | Silent            | SCAPER | p.L1180L | S-phase cyclin A-associ42 (0.00)    | 24 (0.25) | 0.67 |
| 11-01 | Gp3 | g.chr10:102107961C>G | Missense Mutation | SCD    | p.D56E   | stearoyl-CoA desaturase95 (0.00)    | 35 (0.23) | 0.61 |
| 11-01 | Gp3 | g.chr3:38888612G>A   | Missense Mutation | SCN11A | p.A1650V | sodium channel, voltage67 (0.00)    | 33 (0.27) | 0.73 |
| 11-01 | Gp3 | g.chr2:166848742C>A  | Missense Mutation | SCN1A  | p.M1653I | sodium channel, voltage66 (0.00)    | 25 (0.28) | 0.75 |
| 11-01 | Gp3 | g.chr2:166894463G>T  | Silent            | SCN1A  | p.I895I  | sodium channel, voltage125 (0.00)   | 63 (0.14) | 0.38 |
| 11-01 | Gp3 | g.chr2:166172242G>A  | Missense Mutation | SCN2A  | p.E549K  | sodium channel, voltage71 (0.00)    | 19 (0.42) | 1.12 |
| 11-01 | Gp3 | g.chr2:165984240G>C  | Missense Mutation | SCN3A  | p.S1098R | sodium channel, voltage27 (0.00)    | 31 (0.19) | 0.52 |
| 11-01 | Gp3 | g.chr17:62020336G>C  | Missense Mutation | SCN4A  | p.L1380V | sodium channel, voltage57 (0.00)    | 42 (0.24) | 0.63 |
| 11-01 | Gp3 | g.chr3:38601881G>A   | Silent            | SCN5A  | p.I1333I | sodium channel, voltage29 (0.00)    | 24 (0.29) | 0.78 |
| 11-01 | Gp3 | g.chr2:167304195C>A  | Missense Mutation | SCN7A  | p.M438I  | sodium channel, voltage102 (0.00)   | 42 (0.31) | 0.83 |
| 11-01 | Gp3 | g.chr12:52156446C>T  | Nonsense Mutation | SCN8A  | p.R844*  | sodium channel, voltage36 (0.00)    | 47 (0.15) | 0.40 |
| 11-01 | Gp3 | g.chr12:52162891C>T  | Silent            | SCN8A  | p.H1048H | sodium channel, voltage55 (0.00)    | 49 (0.47) | 1.25 |



|       |     |                      |                   |          |          |                                     |            |      |
|-------|-----|----------------------|-------------------|----------|----------|-------------------------------------|------------|------|
| 11-01 | Gp3 | g.chr2:167108293C>A  | Nonsense Mutation | SCN9A    | p.E1141* | sodium channel, voltage 127 (0.01)  | 51 (0.33)  | 0.89 |
| 11-01 | Gp3 | g.chr16:23364346C>A  | Missense Mutation | SCNN1B   | p.A179E  | sodium channel, non-vo 45 (0.00)    | 27 (0.33)  | 0.89 |
| 11-01 | Gp3 | g.chr16:23366642G>A  | Missense Mutation | SCNN1B   | p.C203Y  | sodium channel, non-vo 20 (0.00)    | 31 (0.23)  | 0.60 |
| 11-01 | Gp3 | g.chr16:23223396A>G  | Silent            | SCNN1G   | p.K406K  | sodium channel, non-vo 39 (0.00)    | 30 (0.17)  | 0.44 |
| 11-01 | Gp3 | g.chr17:10590153G>A  | Missense Mutation | SCO1     | p.S221F  | SCO1 cytochrome c oxi 81 (0.00)     | 75 (0.33)  | 0.89 |
| 11-01 | Gp3 | g.chr7:29980416G>A   | Silent            | SCRN1    | p.Y207Y  | secernin 1 37 (0.03)                | 33 (0.18)  | 0.48 |
| 11-01 | Gp3 | g.chr17:45916900A>T  | Missense Mutation | SCRN2    | p.S156T  | secernin 2 76 (0.00)                | 34 (0.15)  | 0.39 |
| 11-01 | Gp3 | g.chr6:35205680G>T   | Splice Site       | SCUBE3   | p.E238D  | signal peptide, CUB dor 59 (0.00)   | 15 (0.40)  | 1.07 |
| 11-01 | Gp3 | g.chr6:35208959G>T   | Missense Mutation | SCUBE3   | p.G371C  | signal peptide, CUB dor 260 (0.00)  | 248 (0.18) | 0.48 |
| 11-01 | Gp3 | g.chr6:35214033G>T   | Missense Mutation | SCUBE3   | p.A935S  | signal peptide, CUB dor 109 (0.00)  | 88 (0.24)  | 0.64 |
| 11-01 | Gp3 | g.chr12:100717403C>G | Missense Mutation | SCYL2    | p.T499R  | SCY1-like 2 (S. cerevisi 17 (0.00)  | 49 (0.14)  | 0.49 |
| 11-01 | Gp3 | g.chr1:169824012G>T  | Missense Mutation | SCYL3    | p.S523Y  | SCY1-like 3 (S. cerevisi 22 (0.00)  | 38 (0.18)  | 0.49 |
| 11-01 | Gp3 | g.chr1:161310383G>A  | Splice Site       | SDHC     |          | succinate dehydrogenas 38 (0.00)    | 28 (0.50)  | 1.33 |
| 11-01 | Gp3 | g.chr16:5046970C>T   | Missense Mutation | SEC14L5  | p.L299F  | SEC14-like 5 (S. cerevisi 16 (0.00) | 28 (0.18)  | 0.48 |
| 11-01 | Gp3 | g.chr9:139357927G>A  | Silent            | SEC16A   | p.C1367C | SEC16 homolog A (S. c 38 (0.00)     | 22 (0.23)  | 0.61 |
| 11-01 | Gp3 | g.chr9:139372015G>T  | Missense Mutation | SEC16A   | p.A18D   | SEC16 homolog A (S. c 23 (0.00)     | 39 (0.18)  | 0.48 |
| 11-01 | Gp3 | g.chr1:177899766C>A  | Nonsense Mutation | SEC16B   | p.E1009* | SEC16 homolog B (S. c 23 (0.00)     | 23 (0.22)  | 0.58 |
| 11-01 | Gp3 | g.chr10:121663649G>A | Missense Mutation | SEC23IP  | p.V321I  | SEC23 interacting prote 90 (0.00)   | 50 (0.40)  | 1.07 |
| 11-01 | Gp3 | g.chr10:121689133C>A | Nonsense Mutation | SEC23IP  | p.Y776*  | SEC23 interacting prote 23 (0.00)   | 14 (0.36)  | 0.95 |
| 11-01 | Gp3 | g.chr5:134002579G>A  | Missense Mutation | SEC24A   | p.G211E  | SEC24 family member 48 (0.02)       | 40 (0.20)  | 0.53 |
| 11-01 | Gp3 | g.chr4:119718894C>G  | Missense Mutation | SEC24D   | p.A329P  | SEC24 family member 133 (0.00)      | 23 (0.26)  | 0.70 |
| 11-01 | Gp3 | g.chr4:83748542G>C   | Missense Mutation | SEC31A   | p.P1091A | SEC31 homolog A (S. c 58 (0.00)     | 56 (0.20)  | 0.52 |
| 11-01 | Gp3 | g.chr10:12204250G>A  | Silent            | SEC61A2  | p.R402R  | Sec61 alpha 2 subunit ( 93 (0.00)   | 72 (0.35)  | 0.93 |
| 11-01 | Gp3 | g.chr4:25849096C>T   | Missense Mutation | SEL1L3   | p.D185N  | sel-1 suppressor of lin-1 21 (0.00) | 13 (0.62)  | 1.64 |
| 11-01 | Gp3 | g.chr1:151339276G>A  | Missense Mutation | SELENBP1 | p.H196Y  | selenium binding protei 52 (0.00)   | 39 (0.38)  | 1.03 |
| 11-01 | Gp3 | g.chr12:109017984G>T | Missense Mutation | SELPLG   | p.P50T   | selectin P ligand 35 (0.00)         | 21 (0.24)  | 0.63 |
| 11-01 | Gp3 | g.chr7:83610695C>T   | Missense Mutation | SEMA3A   | p.D532N  | sema domain, immunog 17 (0.00)      | 16 (0.31)  | 0.83 |
| 11-01 | Gp3 | g.chr7:84636138C>G   | Missense Mutation | SEMA3D   | p.G630R  | sema domain, immunog 57 (0.00)      | 48 (0.31)  | 0.83 |
| 11-01 | Gp3 | g.chr3:52472946G>A   | Missense Mutation | SEMA3G   | p.S500F  | sema domain, immunog 98 (0.01)      | 117 (0.23) | 0.62 |
| 11-01 | Gp3 | g.chr1:156142714C>T  | Missense Mutation | SEMA4A   | p.S411F  | sema domain, immunog 56 (0.00)      | 37 (0.16)  | 0.43 |
| 11-01 | Gp3 | g.chr2:74902715C>G   | Missense Mutation | SEMA4F   | p.A479G  | sema domain, immunog 67 (0.01)      | 52 (0.27)  | 0.41 |
| 11-01 | Gp3 | g.chr3:185324164C>T  | Missense Mutation | SENP2    | p.R166C  | SUMO1/sentrin/SMT3 105 (0.00)       | 70 (0.19)  | 0.50 |
| 11-01 | Gp3 | g.chr3:185327061G>T  | Missense Mutation | SENP2    | p.K215N  | SUMO1/sentrin/SMT3 18 (0.00)        | 15 (0.53)  | 1.42 |
| 11-01 | Gp3 | g.chr15:72432326A>G  | Missense Mutation | SENP8    | p.H121R  | SUMO/sentrin specific 161 (0.00)    | 32 (0.22)  | 0.58 |
| 11-01 | Gp3 | g.chr5:132097188C>A  | Missense Mutation | SEPT8    | p.M306I  | septin 8 44 (0.00)                  | 31 (0.19)  | 0.52 |

|       |     |                     |                   |          |          |                           |            |            |      |
|-------|-----|---------------------|-------------------|----------|----------|---------------------------|------------|------------|------|
| 11-01 | Gp3 | g.chr22:42969989C>T | Silent            | SERHL2   | p.S291S  | serine hydrolase-like 2   | 113 (0.00) | 127 (0.25) | 0.67 |
| 11-01 | Gp3 | g.chr6:122768351G>A | Missense Mutation | SERINC1  | p.P304S  | serine incorporator 1     | 57 (0.00)  | 23 (0.43)  | 0.67 |
| 11-01 | Gp3 | g.chr20:43129879A>G | Missense Mutation | SERINC3  | p.I373T  | serine incorporator 3     | 70 (0.00)  | 49 (0.14)  | 0.38 |
| 11-01 | Gp3 | g.chr14:94780864G>A | Missense Mutation | SERPINA6 | p.S41L   | serpin peptidase inhibitc | 104 (0.00) | 59 (0.19)  | 0.50 |
| 11-01 | Gp3 | g.chr6:2838164C>T   | Missense Mutation | SERPINB1 | p.E126K  | serpin peptidase inhibitc | 74 (0.00)  | 32 (0.38)  | 1.00 |
| 11-01 | Gp3 | g.chr6:2892071C>T   | Missense Mutation | SERPINB9 | p.S240N  | serpin peptidase inhibitc | 45 (0.00)  | 38 (0.26)  | 0.70 |
| 11-01 | Gp3 | g.chr17:1657640G>A  | Missense Mutation | SERPINF2 | p.V430M  | serpin peptidase inhibitc | 20 (0.00)  | 44 (0.18)  | 0.48 |
| 11-01 | Gp3 | g.chr18:42281770G>A | Silent            | SETBP1   | p.E153E  | SET binding protein 1     | 84 (0.00)  | 97 (0.42)  | 1.13 |
| 11-01 | Gp3 | g.chr18:42530116G>A | Missense Mutation | SETBP1   | p.G271R  | SET binding protein 1     | 16 (0.00)  | 15 (0.40)  | 1.07 |
| 11-01 | Gp3 | g.chr4:140441505G>A | Missense Mutation | SETD7    | p.L230F  | SET domain containing     | 44 (0.00)  | 62 (0.15)  | 0.39 |
| 11-01 | Gp3 | g.chr9:135145074C>A | Missense Mutation | SETX     | p.L2405F | senataxin                 | 60 (0.00)  | 36 (0.61)  | 1.63 |
| 11-01 | Gp3 | g.chr22:26747101C>A | Missense Mutation | SEZ6L    | p.Q831K  | seizure related 6 homolc  | 36 (0.00)  | 16 (0.50)  | 1.33 |
| 11-01 | Gp3 | g.chr22:26747102A>T | Missense Mutation | SEZ6L    | p.Q831L  | seizure related 6 homolc  | 36 (0.00)  | 16 (0.50)  | 1.33 |
| 11-01 | Gp3 | g.chr11:64536718C>A | Silent            | SF1      | p.G226G  | splicing factor 1         | 82 (0.00)  | 29 (0.45)  | 1.20 |
| 11-01 | Gp3 | g.chr11:64536741G>A | Missense Mutation | SF1      | p.R219W  | splicing factor 1         | 74 (0.00)  | 25 (0.48)  | 1.28 |
| 11-01 | Gp3 | g.chr11:65828175G>A | Silent            | SF3B2    | p.L567L  | splicing factor 3b, subur | 57 (0.00)  | 76 (0.32)  | 0.84 |
| 11-01 | Gp3 | g.chr16:70601377G>A | Missense Mutation | SF3B3    | p.G964R  | splicing factor 3b, subur | 64 (0.00)  | 55 (0.25)  | 0.68 |
| 11-01 | Gp3 | g.chr10:81373703G>T | Missense Mutation | SFTPA1   | p.S209I  | surfactant protein A1     | 95 (0.00)  | 86 (0.29)  | 0.78 |
| 11-01 | Gp3 | g.chr10:81317314G>A | Missense Mutation | SFTPA2   | p.T133I  | surfactant protein A2     | 75 (0.01)  | 53 (0.83)  | 2.21 |
| 11-01 | Gp3 | g.chr10:81701235C>T | Missense Mutation | SFTPD    | p.G196S  | surfactant protein D      | 59 (0.00)  | 35 (0.23)  | 0.61 |
| 11-01 | Gp3 | g.chr5:174940487C>A | Silent            | SFXN1    | p.P206P  | sideroflexin 1            | 24 (0.00)  | 24 (0.33)  | 0.89 |
| 11-01 | Gp3 | g.chr1:67137668G>A  | Missense Mutation | SGIP1    | p.E184K  | SH3-domain GRB2-like 15   | (0.00)     | 18 (0.72)  | 1.93 |
| 11-01 | Gp3 | g.chr1:67139016C>T  | Silent            | SGIP1    | p.L205L  | SH3-domain GRB2-like 211  | (0.00)     | 154 (0.15) | 0.40 |
| 11-01 | Gp3 | g.chr1:67147987C>T  | Missense Mutation | SGIP1    | p.P417L  | SH3-domain GRB2-like 113  | (0.00)     | 22 (0.23)  | 0.61 |
| 11-01 | Gp3 | g.chr6:134491566G>A | Missense Mutation | SGK1     | p.P379L  | serum/glucocorticoid re;  | 26 (0.00)  | 25 (0.24)  | 0.64 |
| 11-01 | Gp3 | g.chr8:8233893C>G   | Missense Mutation | SGK223   | p.D676H  |                           | 58 (0.00)  | 44 (0.32)  | 0.47 |
| 11-01 | Gp3 | g.chr2:201436492C>T | Missense Mutation | SGOL2    | p.L475F  | shugoshin-like 2 (S. pon  | 162 (0.00) | 174 (0.24) | 0.63 |
| 11-01 | Gp3 | g.chr14:64153166C>T | Missense Mutation | SGPP1    | p.G328E  | sphingosine-1-phosphat    | 47 (0.00)  | 32 (0.25)  | 0.67 |
| 11-01 | Gp3 | g.chr5:171785849C>T | Missense Mutation | SH3PXD2B | p.G199S  | SH3 and PX domains 2I     | 25 (0.00)  | 19 (0.26)  | 0.70 |
| 11-01 | Gp3 | g.chr5:148418000G>A | Silent            | SH3TC2   | p.L280L  | SH3 domain and tetratri   | 122 (0.01) | 68 (0.24)  | 0.63 |
| 11-01 | Gp3 | g.chr9:91652989G>T  | Silent            | SHC3     | p.T525T  | SHC (Src homology 2 d     | 28 (0.00)  | 28 (0.64)  | 1.71 |
| 11-01 | Gp3 | g.chr7:155604814C>A | Start Codon SNP   | SHH      | p.M1I    | sonic hedgehog            | 44 (0.00)  | 36 (0.28)  | 0.74 |
| 11-01 | Gp3 | g.chr19:41084066C>A | Silent            | SHKBP1   | p.V89V   | SH3KBP1 binding prote     | 104 (0.00) | 30 (0.53)  | 1.42 |
| 11-01 | Gp3 | g.chr19:41086809G>A | Missense Mutation | SHKBP1   | p.A271T  | SH3KBP1 binding prote     | 16 (0.00)  | 13 (0.54)  | 1.44 |
| 11-01 | Gp3 | g.chr17:18232191C>G | Missense Mutation | SHMT1    | p.R442T  | serine hydroxymethyltra   | 43 (0.00)  | 45 (0.16)  | 0.41 |

|       |     |                     |                   |         |          |                              |            |           |      |
|-------|-----|---------------------|-------------------|---------|----------|------------------------------|------------|-----------|------|
| 11-01 | Gp3 | g.chr3:72810776C>T  | Intron            | SHQ1    |          | SHQ1, H/ACA ribonucl         | 58 (0.00)  | 44 (0.34) | 0.91 |
| 11-01 | Gp3 | g.chr3:72811090A>G  | Intron            | SHQ1    |          | SHQ1, H/ACA ribonucl         | 23 (0.00)  | 19 (0.47) | 1.26 |
| 11-01 | Gp3 | g.chr3:72817109C>G  | Intron            | SHQ1    |          | SHQ1, H/ACA ribonucl         | 71 (0.00)  | 52 (0.42) | 1.13 |
| 11-01 | Gp3 | g.chr3:72818847C>A  | Intron            | SHQ1    |          | SHQ1, H/ACA ribonucl         | 49 (0.00)  | 34 (0.53) | 1.41 |
| 11-01 | Gp3 | g.chr3:72828443G>A  | Intron            | SHQ1    |          | SHQ1, H/ACA ribonucl         | 115 (0.00) | 54 (0.15) | 0.40 |
| 11-01 | Gp3 | g.chr3:72832249C>T  | Intron            | SHQ1    |          | SHQ1, H/ACA ribonucl         | 130 (0.00) | 81 (0.22) | 0.59 |
| 11-01 | Gp3 | g.chr3:72832695C>T  | Intron            | SHQ1    |          | SHQ1, H/ACA ribonucl         | 38 (0.00)  | 17 (0.35) | 0.94 |
| 11-01 | Gp3 | g.chr3:72850305C>T  | Intron            | SHQ1    |          | SHQ1, H/ACA ribonucl         | 38 (0.00)  | 21 (0.38) | 1.02 |
| 11-01 | Gp3 | g.chr3:72857648C>T  | Intron            | SHQ1    |          | SHQ1, H/ACA ribonucl         | 64 (0.00)  | 50 (0.18) | 0.48 |
| 11-01 | Gp3 | g.chr3:72858723C>A  | Intron            | SHQ1    |          | SHQ1, H/ACA ribonucl         | 39 (0.00)  | 12 (0.50) | 1.33 |
| 11-01 | Gp3 | g.chr3:72859283G>T  | Intron            | SHQ1    |          | SHQ1, H/ACA ribonucl         | 74 (0.00)  | 35 (0.26) | 0.69 |
| 11-01 | Gp3 | g.chr3:72860361C>A  | Intron            | SHQ1    |          | SHQ1, H/ACA ribonucl         | 103 (0.00) | 46 (0.24) | 0.64 |
| 11-01 | Gp3 | g.chr3:72866034C>T  | Intron            | SHQ1    |          | SHQ1, H/ACA ribonucl         | 83 (0.00)  | 34 (0.15) | 0.39 |
| 11-01 | Gp3 | g.chr3:72871776G>A  | Intron            | SHQ1    |          | SHQ1, H/ACA ribonucl         | 55 (0.00)  | 54 (0.19) | 0.49 |
| 11-01 | Gp3 | g.chr3:72874293C>T  | Intron            | SHQ1    |          | SHQ1, H/ACA ribonucl         | 46 (0.02)  | 48 (0.25) | 0.67 |
| 11-01 | Gp3 | g.chr3:72878247G>A  | Intron            | SHQ1    |          | SHQ1, H/ACA ribonucl         | 53 (0.02)  | 50 (0.22) | 0.59 |
| 11-01 | Gp3 | g.chr3:72878543G>T  | Intron            | SHQ1    |          | SHQ1, H/ACA ribonucl         | 67 (0.00)  | 86 (0.20) | 0.53 |
| 11-01 | Gp3 | g.chr3:72887174G>C  | Intron            | SHQ1    |          | SHQ1, H/ACA ribonucl         | 61 (0.00)  | 68 (0.26) | 0.71 |
| 11-01 | Gp3 | g.chr4:77660203G>A  | Missense Mutation | SHROOM3 | p.G293S  | shroom family member         | 16 (0.00)  | 16 (0.44) | 1.17 |
| 11-01 | Gp3 | g.chr3:164709985G>T | Silent            | SI      | p.R1655R | sucrase-isomaltase (alph     | 44 (0.00)  | 16 (0.38) | 1.00 |
| 11-01 | Gp3 | g.chr21:38115852C>A | Missense Mutation | SIM2    | p.P388Q  | single-minded family b       | 35 (0.00)  | 30 (0.63) | 1.69 |
| 11-01 | Gp3 | g.chr15:75705350C>A | Missense Mutation | SIN3A   | p.Q170H  | SIN3 transcription regul     | 38 (0.03)  | 36 (0.28) | 0.74 |
| 11-01 | Gp3 | g.chr14:72128132G>A | Missense Mutation | SIPA1L1 | p.V735I  | signal-induced prolifera     | 32 (0.00)  | 18 (0.33) | 0.89 |
| 11-01 | Gp3 | g.chr14:72190434C>T | Missense Mutation | SIPA1L1 | p.L1427F | signal-induced prolifera     | 52 (0.00)  | 34 (0.15) | 0.39 |
| 11-01 | Gp3 | g.chr14:72190523G>A | Silent            | SIPA1L1 | p.Q1456Q | signal-induced prolifera     | 68 (0.00)  | 79 (0.49) | 1.32 |
| 11-01 | Gp3 | g.chr14:72202073G>T | Missense Mutation | SIPA1L1 | p.E1696D | signal-induced prolifera     | 119 (0.00) | 56 (0.27) | 0.71 |
| 11-01 | Gp3 | g.chr20:1629808C>T  | Missense Mutation | SIRPG   | p.S107N  | signal-regulatory proteir    | 63 (0.00)  | 31 (0.16) | 0.43 |
| 11-01 | Gp3 | g.chr19:39384478G>A | Silent            | SIRT2   | p.A31A   | sirtuin 2                    | 21 (0.00)  | 13 (0.54) | 1.44 |
| 11-01 | Gp3 | g.chr1:160465980G>T | Silent            | SLAMF6  | p.R85R   | SLAM family member           | 57 (0.00)  | 23 (0.26) | 0.70 |
| 11-01 | Gp3 | g.chr16:56926026G>A | Silent            | SLC12A3 | p.G800G  | solute carrier family 12     | 46 (0.00)  | 48 (0.23) | 0.61 |
| 11-01 | Gp3 | g.chr20:44663639G>T | Missense Mutation | SLC12A5 | p.E35D   | solute carrier family 12     | 30 (0.00)  | 45 (0.16) | 0.41 |
| 11-01 | Gp3 | g.chr15:34551102C>T | Missense Mutation | SLC12A6 | p.R152H  | solute carrier family 12     | 15 (0.00)  | 13 (0.38) | 1.03 |
| 11-01 | Gp3 | g.chr17:26822771C>T | Silent            | SLC13A2 | p.T469T  | solute carrier family 13     | 84 (0.00)  | 57 (0.21) | 0.56 |
| 11-01 | Gp3 | g.chr13:99368170G>T | Missense Mutation | SLC15A1 | p.Q229K  | solute carrier family 15     | 61 (0.00)  | 42 (0.17) | 0.44 |
| 11-01 | Gp3 | g.chrX:73744551C>T  | Silent            | SLC16A2 | p.F311F  | solute carrier family 16, 26 | (0.00)     | 24 (0.46) | 0.76 |

|       |     |                      |                   |           |         |                                      |           |      |
|-------|-----|----------------------|-------------------|-----------|---------|--------------------------------------|-----------|------|
| 11-01 | Gp3 | g.chr17:62950350G>A  | RNA               | SLC16A6P1 |         | SLC16A6 pseudogene 141 (0.00)        | 49 (0.18) | 0.49 |
| 11-01 | Gp3 | g.chr19:49934036C>A  | Missense Mutation | SLC17A7   | p.A475S | solute carrier family 17 (33 (0.00)  | 27 (0.30) | 0.79 |
| 11-01 | Gp3 | g.chr12:100813706G>A | Silent            | SLC17A8   | p.E513E | solute carrier family 17 (45 (0.00)  | 37 (0.24) | 0.83 |
| 11-01 | Gp3 | g.chr10:119003695C>A | Missense Mutation | SLC18A2   | p.A112D | solute carrier family 18 (70 (0.00)  | 25 (0.32) | 0.85 |
| 11-01 | Gp3 | g.chr1:169437466G>T  | Missense Mutation | SLC19A2   | p.S416R | solute carrier family 19 (38 (0.00)  | 39 (0.26) | 0.68 |
| 11-01 | Gp3 | g.chr11:35339051C>T  | Start Codon SNP   | SLC1A2    | p.M1I   | solute carrier family 1 (84 (0.00)   | 38 (0.29) | 0.77 |
| 11-01 | Gp3 | g.chr11:2937971G>A   | Splice Site       | SLC22A18  |         | solute carrier family 22, 19 (0.00)  | 41 (0.22) | 0.59 |
| 11-01 | Gp3 | g.chr6:160664675C>T  | Missense Mutation | SLC22A2   | p.R403H | solute carrier family 22 (27 (0.00)  | 23 (0.35) | 0.93 |
| 11-01 | Gp3 | g.chr5:131670540G>T  | Missense Mutation | SLC22A4   | p.L392F | solute carrier family 22 (138 (0.00) | 67 (0.31) | 0.84 |
| 11-01 | Gp3 | g.chr20:4913102G>A   | Splice Site       | SLC23A2   | p.P36L  | solute carrier family 23 (24 (0.04)  | 25 (0.32) | 0.85 |
| 11-01 | Gp3 | g.chr15:65916816C>A  | Missense Mutation | SLC24A1   | p.T133K | solute carrier family 24 (73 (0.00)  | 35 (0.17) | 0.46 |
| 11-01 | Gp3 | g.chr15:65918221G>A  | Silent            | SLC24A1   | p.K601K | solute carrier family 24 (129 (0.00) | 72 (0.19) | 0.52 |
| 11-01 | Gp3 | g.chr2:172648079G>A  | Silent            | SLC25A12  | p.L489L | solute carrier family 25 (57 (0.02)  | 47 (0.15) | 0.40 |
| 11-01 | Gp3 | g.chr7:95818905T>C   | Missense Mutation | SLC25A13  | p.Y279C | solute carrier family 25 (86 (0.00)  | 49 (0.18) | 0.49 |
| 11-01 | Gp3 | g.chr22:18066185G>T  | Missense Mutation | SLC25A18  | p.M98I  | solute carrier family 25 (44 (0.00)  | 51 (0.33) | 0.89 |
| 11-01 | Gp3 | g.chr22:18066190G>T  | Missense Mutation | SLC25A18  | p.R100L | solute carrier family 25 (44 (0.00)  | 51 (0.33) | 0.89 |
| 11-01 | Gp3 | g.chr12:98993839C>G  | Missense Mutation | SLC25A3   | p.P251A | solute carrier family 25 (33 (0.00)  | 30 (0.23) | 0.79 |
| 11-01 | Gp3 | g.chr12:98995188C>A  | Missense Mutation | SLC25A3   | p.T324N | solute carrier family 25 (28 (0.00)  | 15 (0.47) | 1.59 |
| 11-01 | Gp3 | g.chr3:39431045C>A   | Silent            | SLC25A38  | p.L43L  | solute carrier family 25, 32 (0.00)  | 18 (0.33) | 0.89 |
| 11-01 | Gp3 | g.chr19:6432215C>A   | Splice Site       | SLC25A41  | p.V70L  | solute carrier family 25, 19 (0.00)  | 15 (0.47) | 1.24 |
| 11-01 | Gp3 | g.chr7:103018201C>A  | Missense Mutation | SLC26A5   | p.D611Y | solute carrier family 26 (30 (0.00)  | 23 (0.70) | 1.86 |
| 11-01 | Gp3 | g.chr7:103061885G>A  | Missense Mutation | SLC26A5   | p.P26L  | solute carrier family 26 (38 (0.00)  | 29 (0.24) | 0.64 |
| 11-01 | Gp3 | g.chr3:48667359C>T   | Missense Mutation | SLC26A6   | p.G456D | solute carrier family 26 (43 (0.00)  | 60 (0.18) | 0.49 |
| 11-01 | Gp3 | g.chr8:92330496C>T   | Missense Mutation | SLC26A7   | p.P177L | solute carrier family 26 (27 (0.00)  | 33 (0.18) | 0.61 |
| 11-01 | Gp3 | g.chr8:92352780G>C   | Splice Site       | SLC26A7   |         | solute carrier family 26 (32 (0.00)  | 24 (0.29) | 0.97 |
| 11-01 | Gp3 | g.chr6:35919238G>A   | Silent            | SLC26A8   | p.L757L | solute carrier family 26 (34 (0.00)  | 30 (0.17) | 0.44 |
| 11-01 | Gp3 | g.chr1:153752394C>T  | Silent            | SLC27A3   | p.Y784Y | solute carrier family 27 (16 (0.00)  | 15 (0.33) | 0.89 |
| 11-01 | Gp3 | g.chr12:7973921C>G   | Splice Site       | SLC2A14   | p.V289L | solute carrier family 2 (148 (0.00)  | 23 (0.22) | 0.58 |
| 11-01 | Gp3 | g.chr9:136343416G>A  | Missense Mutation | SLC2A6    | p.P72L  | solute carrier family 2 (125 (0.00)  | 34 (0.26) | 0.71 |
| 11-01 | Gp3 | g.chr9:116021143G>A  | Splice Site       | SLC31A1   |         | solute carrier family 31 (52 (0.00)  | 23 (0.22) | 0.58 |
| 11-01 | Gp3 | g.chr4:25665858C>A   | Missense Mutation | SLC34A2   | p.F95L  | solute carrier family 34 (124 (0.00) | 70 (0.27) | 0.72 |
| 11-01 | Gp3 | g.chr1:100476969C>T  | Nonsense Mutation | SLC35A3   | p.Q172* | solute carrier family 35 (25 (0.00)  | 16 (0.38) | 1.00 |
| 11-01 | Gp3 | g.chr3:112299708C>G  | Missense Mutation | SLC35A5   | p.I248M | solute carrier family 35, 39 (0.00)  | 23 (0.30) | 0.81 |
| 11-01 | Gp3 | g.chr7:133994231C>A  | Splice Site       | SLC35B4   | p.R26R  | solute carrier family 35 (29 (0.00)  | 25 (0.24) | 0.64 |
| 11-01 | Gp3 | g.chr3:136573697C>G  | Missense Mutation | SLC35G2   | p.P132R | solute carrier family 35, 52 (0.00)  | 14 (0.43) | 1.14 |

|       |     |                      |                   |          |         |                                      |            |      |
|-------|-----|----------------------|-------------------|----------|---------|--------------------------------------|------------|------|
| 11-01 | Gp3 | g.chr7:140035248G>A  | Silent            | SLC37A3  | p.L483L | solute carrier family 37, 102 (0.00) | 75 (0.15)  | 0.39 |
| 11-01 | Gp3 | g.chr12:46622995C>G  | Missense Mutation | SLC38A1  | p.M85I  | solute carrier family 38, 50 (0.00)  | 38 (0.21)  | 0.56 |
| 11-01 | Gp3 | g.chr12:46764380C>A  | Missense Mutation | SLC38A2  | p.V77L  | solute carrier family 38, 112 (0.00) | 120 (0.17) | 0.44 |
| 11-01 | Gp3 | g.chr3:50256437G>A   | RNA               | SLC38A3  |         | solute carrier family 38, 41 (0.00)  | 44 (0.20)  | 0.55 |
| 11-01 | Gp3 | g.chr12:47172308G>C  | Silent            | SLC38A4  | p.P323P | solute carrier family 38, 62 (0.00)  | 33 (0.21)  | 0.57 |
| 11-01 | Gp3 | g.chr5:54922379G>A   | Silent            | SLC38A9  | p.F480F | solute carrier family 38, 109 (0.00) | 73 (0.19)  | 0.51 |
| 11-01 | Gp3 | g.chr2:196571361C>T  | Missense Mutation | SLC39A10 | p.S413F | solute carrier family 39, 36 (0.00)  | 39 (0.18)  | 0.48 |
| 11-01 | Gp3 | g.chr8:22273657C>T   | Silent            | SLC39A14 | p.A337A | solute carrier family 39, 22 (0.00)  | 16 (0.56)  | 0.84 |
| 11-01 | Gp3 | g.chr14:21469282C>T  | Silent            | SLC39A2  | p.P158P | solute carrier family 39, 40 (0.00)  | 17 (0.29)  | 0.78 |
| 11-01 | Gp3 | g.chr3:125741762G>A  | Silent            | SLC41A3  | p.V204V | solute carrier family 41, 37 (0.00)  | 26 (0.62)  | 1.64 |
| 11-01 | Gp3 | g.chr5:33954530C>A   | Missense Mutation | SLC45A2  | p.S323I | solute carrier family 45, 20 (0.00)  | 15 (0.47)  | 1.24 |
| 11-01 | Gp3 | g.chr17:19458620G>A  | Silent            | SLC47A1  | p.V190V | solute carrier family 47, 50 (0.00)  | 29 (0.21)  | 0.55 |
| 11-01 | Gp3 | g.chr2:162730483G>T  | Nonsense Mutation | SLC4A10  | p.E306* | solute carrier family 4, s134 (0.00) | 81 (0.22)  | 0.59 |
| 11-01 | Gp3 | g.chr4:72338501G>A   | Missense Mutation | SLC4A4   | p.A573T | solute carrier family 4 (ε87 (0.00)  | 96 (0.42)  | 1.11 |
| 11-01 | Gp3 | g.chr16:24919380C>T  | Silent            | SLC5A11  | p.I454I | solute carrier family 5 (ε75 (0.00)  | 71 (0.23)  | 0.60 |
| 11-01 | Gp3 | g.chr11:26718750G>T  | Missense Mutation | SLC5A12  | p.P334Q | solute carrier family 5 (ε128 (0.00) | 83 (0.16)  | 0.42 |
| 11-01 | Gp3 | g.chr11:26743236C>A  | Missense Mutation | SLC5A12  | p.W9L   | solute carrier family 5 (ε101 (0.00) | 63 (0.16)  | 0.42 |
| 11-01 | Gp3 | g.chr2:27427747C>A   | Missense Mutation | SLC5A6   | p.G263C | solute carrier family 5 (ε33 (0.00)  | 17 (0.29)  | 0.78 |
| 11-01 | Gp3 | g.chr19:49797171T>A  | Missense Mutation | SLC6A16  | p.S511C | solute carrier family 6, r180 (0.00) | 85 (0.21)  | 0.56 |
| 11-01 | Gp3 | g.chr19:49812618G>A  | Silent            | SLC6A16  | p.F309F | solute carrier family 6, r25 (0.00)  | 69 (0.22)  | 0.58 |
| 11-01 | Gp3 | g.chr1:110734731C>G  | Silent            | SLC6A17  | p.A334A | solute carrier family 6 (r25 (0.00)  | 21 (0.24)  | 0.63 |
| 11-01 | Gp3 | g.chr3:45804495T>G   | Missense Mutation | SLC6A20  | p.D458A | solute carrier family 6 (r71 (0.00)  | 38 (0.26)  | 0.70 |
| 11-01 | Gp3 | g.chr11:20648352C>A  | Missense Mutation | SLC6A5   | p.F453L | solute carrier family 6 (r49 (0.00)  | 20 (0.45)  | 1.20 |
| 11-01 | Gp3 | g.chr1:44468052G>A   | Silent            | SLC6A9   | p.L234L | solute carrier family 6 (r49 (0.00)  | 39 (0.15)  | 0.41 |
| 11-01 | Gp3 | g.chr8:87242398C>A   | Missense Mutation | SLC7A13  | p.G37C  | solute carrier family 7 (ε67 (0.01)  | 61 (0.15)  | 0.49 |
| 11-01 | Gp3 | g.chr14:23243213C>T  | Missense Mutation | SLC7A7   | p.G453D | solute carrier family 7 (ε50 (0.00)  | 26 (0.31)  | 0.82 |
| 11-01 | Gp3 | g.chr14:23244715G>T  | Missense Mutation | SLC7A7   | p.P345T | solute carrier family 7 (ε54 (0.02)  | 34 (0.24)  | 0.63 |
| 11-01 | Gp3 | g.chr14:23282476G>A  | Silent            | SLC7A7   | p.C44C  | solute carrier family 7 (ε77 (0.00)  | 97 (0.19)  | 0.49 |
| 11-01 | Gp3 | g.chr14:23596512C>G  | Missense Mutation | SLC7A8   | p.V277L | solute carrier family 7 (ε41 (0.00)  | 21 (0.33)  | 0.89 |
| 11-01 | Gp3 | g.chr19:33334858C>T  | Splice Site       | SLC7A9   |         | solute carrier family 7 (ε23 (0.00)  | 20 (0.35)  | 0.93 |
| 11-01 | Gp3 | g.chr14:70633465G>A  | Missense Mutation | SLC8A3   | p.R559W | solute carrier family 8 (ε20 (0.00)  | 9 (0.56)   | 1.48 |
| 11-01 | Gp3 | g.chr12:113748055G>T | Missense Mutation | SLC8B1   | p.P414H | solute carrier family 8 (ε17 (0.00)  | 14 (0.43)  | 1.14 |
| 11-01 | Gp3 | g.chr1:27429801G>T   | Silent            | SLC9A1   | p.G496G | solute carrier family 9, s32 (0.00)  | 32 (0.25)  | 0.67 |
| 11-01 | Gp3 | g.chr1:27440435C>A   | Missense Mutation | SLC9A1   | p.S232I | solute carrier family 9, s18 (0.00)  | 23 (0.26)  | 0.70 |
| 11-01 | Gp3 | g.chr5:476469C>A     | Nonsense Mutation | SLC9A3   | p.E639* | solute carrier family 9, s18 (0.00)  | 42 (0.14)  | 0.38 |

|       |     |                     |                   |         |         |                                      |            |      |
|-------|-----|---------------------|-------------------|---------|---------|--------------------------------------|------------|------|
| 11-01 | Gp3 | g.chr2:103130615C>T | Silent            | SLC9A4  | p.S542S | solute carrier family 9, s38 (0.00)  | 41 (0.32)  | 0.85 |
| 11-01 | Gp3 | g.chr4:103964510T>A | Silent            | SLC9B2  | p.G306G | solute carrier family 9, s58 (0.00)  | 37 (0.19)  | 0.50 |
| 11-01 | Gp3 | g.chr1:173493956C>T | Missense Mutation | SLC9C2  | p.G826S | solute carrier family 9, r46 (0.00)  | 30 (0.23)  | 0.62 |
| 11-01 | Gp3 | g.chr12:21422669C>A | Missense Mutation | SLCO1A2 | p.R477I | solute carrier organic an 36 (0.00)  | 16 (0.31)  | 0.83 |
| 11-01 | Gp3 | g.chr12:21358916C>A | Silent            | SLCO1B1 | p.I482I | solute carrier organic an 82 (0.00)  | 45 (0.18)  | 0.47 |
| 11-01 | Gp3 | g.chr12:21358924G>A | Missense Mutation | SLCO1B1 | p.C485Y | solute carrier organic an 77 (0.00)  | 43 (0.26)  | 0.68 |
| 11-01 | Gp3 | g.chr11:74913947G>T | Splice Site       | SLCO2B1 | p.G334* | solute carrier organic an 38 (0.00)  | 24 (0.29)  | 0.78 |
| 11-01 | Gp3 | g.chr15:92690336C>G | Missense Mutation | SLCO3A1 | p.I545M | solute carrier organic an 34 (0.00)  | 44 (0.27)  | 0.73 |
| 11-01 | Gp3 | g.chr5:101599462G>A | Silent            | SLCO4C1 | p.I275I | solute carrier organic an 155 (0.01) | 111 (0.20) | 0.53 |
| 11-01 | Gp3 | g.chr8:70744100G>A  | Missense Mutation | SLCO5A1 | p.A270V | solute carrier organic an 25 (0.00)  | 22 (0.27)  | 0.91 |
| 11-01 | Gp3 | g.chr10:98806550G>A | Silent            | SLIT1   | p.L572L | slit homolog 1 (Drosoph 46 (0.00)    | 49 (0.14)  | 0.38 |
| 11-01 | Gp3 | g.chr4:20270494C>T  | Silent            | SLIT2   | p.L129L | slit homolog 2 (Drosoph 60 (0.00)    | 27 (0.22)  | 0.59 |
| 11-01 | Gp3 | g.chr5:168244429C>A | Silent            | SLIT3   | p.L223L | slit homolog 3 (Drosoph 28 (0.00)    | 29 (0.24)  | 0.64 |
| 11-01 | Gp3 | g.chrX:144904520C>A | Missense Mutation | SLITRK2 | p.L193I | SLIT and NTRK-like fa 51 (0.02)      | 27 (0.37)  | 0.62 |
| 11-01 | Gp3 | g.chr3:164907847C>T | Missense Mutation | SLITRK3 | p.D258N | SLIT and NTRK-like fa 53 (0.00)      | 40 (0.25)  | 0.67 |
| 11-01 | Gp3 | g.chr15:59181664C>A | Missense Mutation | SLTM    | p.R723S | SAFB-like, transcriptio 79 (0.00)    | 44 (0.30)  | 0.79 |
| 11-01 | Gp3 | g.chr5:159830391G>A | Silent            | SLU7    | p.S554S | SLU7 splicing factor ho 132 (0.00)   | 128 (0.23) | 0.62 |
| 11-01 | Gp3 | g.chr5:159842297G>C | Nonsense Mutation | SLU7    | p.S2*   | SLU7 splicing factor ho 39 (0.00)    | 23 (0.48)  | 1.28 |
| 11-01 | Gp3 | g.chr15:67462938C>T | Silent            | SMAD3   | p.N174N | SMAD family member 47 (0.00)         | 27 (0.30)  | 0.79 |
| 11-01 | Gp3 | g.chr15:67479777G>A | Missense Mutation | SMAD3   | p.A318T | SMAD family member 88 (0.00)         | 56 (0.25)  | 0.67 |
| 11-01 | Gp3 | g.chr18:48567677G>A | Intron            | SMAD4   |         | SMAD family member 54 (0.00)         | 68 (0.25)  | 0.67 |
| 11-01 | Gp3 | g.chr18:48567763C>T | Intron            | SMAD4   |         | SMAD family member 35 (0.00)         | 26 (0.27)  | 0.72 |
| 11-01 | Gp3 | g.chr18:48568520G>A | Intron            | SMAD4   |         | SMAD family member 55 (0.00)         | 32 (0.47)  | 1.25 |
| 11-01 | Gp3 | g.chr18:48579460C>T | Intron            | SMAD4   |         | SMAD family member 52 (0.00)         | 34 (0.29)  | 0.78 |
| 11-01 | Gp3 | g.chr18:48586223G>A | Intron            | SMAD4   |         | SMAD family member 50 (0.02)         | 21 (0.43)  | 1.14 |
| 11-01 | Gp3 | g.chr18:48587850C>G | Intron            | SMAD4   |         | SMAD family member 82 (0.00)         | 76 (0.17)  | 0.46 |
| 11-01 | Gp3 | g.chr5:135510322G>A | Splice Site       | SMAD5   |         | SMAD family member 39 (0.00)         | 26 (0.54)  | 1.44 |
| 11-01 | Gp3 | g.chr6:71567723G>A  | Missense Mutation | SMAP1   | p.G354S | small ArfGAP 1 23 (0.00)             | 23 (0.30)  | 0.81 |
| 11-01 | Gp3 | g.chr1:40882500G>T  | Missense Mutation | SMAP2   | p.S219I | small ArfGAP2 38 (0.00)              | 35 (0.29)  | 0.76 |
| 11-01 | Gp3 | g.chr9:2039602G>C   | Missense Mutation | SMARCA2 | p.M164I | SWI/SNF related, matri: 60 (0.00)    | 12 (0.50)  | 0.79 |
| 11-01 | Gp3 | g.chr19:11121100G>T | Missense Mutation | SMARCA4 | p.A723S | SWI/SNF related, matri: 101 (0.00)   | 53 (0.21)  | 0.55 |
| 11-01 | Gp3 | g.chr19:11132594G>T | Missense Mutation | SMARCA4 | p.S937I | SWI/SNF related, matri: 27 (0.00)    | 28 (0.18)  | 0.48 |
| 11-01 | Gp3 | g.chr4:95191922G>A  | Missense Mutation | SMARCA4 | p.A79T  | SWI/SNF-related, matri: 50 (0.00)    | 37 (0.30)  | 0.79 |
| 11-01 | Gp3 | g.chr2:217293433C>A | Missense Mutation | SMARCA4 | p.P421Q | SWI/SNF related, matri: 39 (0.00)    | 21 (0.29)  | 0.76 |
| 11-01 | Gp3 | g.chr3:47814324C>A  | Missense Mutation | SMARCC1 | p.A100S | SWI/SNF related, matri: 49 (0.02)    | 36 (0.25)  | 0.67 |

|       |     |                      |                   |             |          |                                      |            |      |
|-------|-----|----------------------|-------------------|-------------|----------|--------------------------------------|------------|------|
| 11-01 | Gp3 | g.chr18:2738517G>A   | Silent            | SMCHD1      | p.V1133V | structural maintenance c22 (0.00)    | 11 (0.45)  | 1.21 |
| 11-01 | Gp3 | g.chr18:2772321C>T   | Missense Mutation | SMCHD1      | p.S1709L | structural maintenance c39 (0.00)    | 48 (0.38)  | 1.00 |
| 11-01 | Gp3 | g.chr18:2784536A>T   | Missense Mutation | SMCHD1      | p.K1879I | structural maintenance c75 (0.00)    | 51 (0.18)  | 0.47 |
| 11-01 | Gp3 | g.chr18:2784607G>T   | Missense Mutation | SMCHD1      | p.G1903W | structural maintenance c53 (0.00)    | 41 (0.22)  | 0.59 |
| 11-01 | Gp3 | g.chr16:18860691G>A  | Missense Mutation | SMG1        | p.P1824L | SMG1 phosphatidylinos 92 (0.00)      | 92 (0.20)  | 0.52 |
| 11-01 | Gp3 | g.chr16:18893627C>T  | Missense Mutation | SMG1        | p.D385N  | SMG1 phosphatidylinos 172 (0.01)     | 169 (0.17) | 0.46 |
| 11-01 | Gp3 | g.chr2:130911430C>T  | Missense Mutation | SMPD4       | p.A619T  | sphingomyelin phospho 34 (0.00)      | 46 (0.24)  | 0.64 |
| 11-01 | Gp3 | g.chr2:130912753G>T  | Missense Mutation | SMPD4       | p.L496M  | sphingomyelin phospho 45 (0.00)      | 65 (0.22)  | 0.57 |
| 11-01 | Gp3 | g.chr16:88747586G>C  | Missense Mutation | SNAI3       | p.H205D  | snail family zinc finger 25 (0.00)   | 31 (0.26)  | 0.69 |
| 11-01 | Gp3 | g.chr20:10329870C>G  | RNA               | SNAP25-AS1  |          | SNAP25 antisense RNA22 (0.00)        | 23 (0.30)  | 0.81 |
| 11-01 | Gp3 | g.chr1:227968246G>A  | Missense Mutation | SNAP47      | p.G423R  | synaptosomal-associated 16 (0.00)    | 34 (0.15)  | 0.39 |
| 11-01 | Gp3 | g.chr9:15459848C>T   | Missense Mutation | SNAPC3      | p.P407L  | small nuclear RNA activ 100 (0.00)   | 50 (0.64)  | 1.01 |
| 11-01 | Gp3 | g.chr15:25328809C>T  | RNA               | SNHG14      |          | small nucleolar RNA ho 55 (0.00)     | 34 (0.71)  | 1.88 |
| 11-01 | Gp3 | g.chr15:25429512T>A  | RNA               | SNHG14      |          | small nucleolar RNA ho 95 (0.00)     | 76 (0.18)  | 0.49 |
| 11-01 | Gp3 | g.chr15:25429513C>A  | RNA               | SNHG14      |          | small nucleolar RNA ho 97 (0.00)     | 73 (0.19)  | 0.51 |
| 11-01 | Gp3 | g.chr1:38005984C>T   | Missense Mutation | SNIP1       | p.E234K  | Smad nuclear interactin 56 (0.00)    | 30 (0.17)  | 0.44 |
| 11-01 | Gp3 | g.chr1:38006005C>A   | Nonsense Mutation | SNIP1       | p.E227*  | Smad nuclear interactin 52 (0.00)    | 28 (0.18)  | 0.48 |
| 11-01 | Gp3 | g.chr15:25492563C>T  | RNA               | SNORD115-42 |          | small nucleolar RNA, C 63 (0.00)     | 43 (0.16)  | 0.43 |
| 11-01 | Gp3 | g.chr3:43389720C>A   | Missense Mutation | SNRK        | p.Q657K  | SNF related kinase 25 (0.00)         | 15 (0.33)  | 0.89 |
| 11-01 | Gp3 | g.chr2:96940882G>A   | Silent            | SNRNP200    | p.D2093D | small nuclear ribonuclec 75 (0.00)   | 39 (0.26)  | 0.68 |
| 11-01 | Gp3 | g.chr2:96942847C>G   | Missense Mutation | SNRNP200    | p.E2022Q | small nuclear ribonuclec 44 (0.00)   | 39 (0.18)  | 0.48 |
| 11-01 | Gp3 | g.chr16:69333551C>T  | Silent            | SNTB2       | p.T468T  | syntrophin, beta 2 (dyst 29 (0.00)   | 18 (0.33)  | 0.89 |
| 11-01 | Gp3 | g.chr17:46196394C>T  | Nonsense Mutation | SNX11       | p.Q129*  | sorting nexin 11 92 (0.00)           | 111 (0.16) | 0.43 |
| 11-01 | Gp3 | g.chr16:29370676G>T  | RNA               | SNX29P2     |          | sorting nexin 29 pseudo 65 (0.00)    | 28 (0.18)  | 0.48 |
| 11-01 | Gp3 | g.chr16:29437256C>A  | lincRNA           | SNX29P2     |          | sorting nexin 29 pseudo 18 (0.00)    | 12 (0.58)  | 1.56 |
| 11-01 | Gp3 | g.chr1:179310326C>T  | Missense Mutation | SOAT1       | p.L221F  | sterol O-acyltransferase 103 (0.00)  | 62 (0.15)  | 0.39 |
| 11-01 | Gp3 | g.chr18:67992276C>G  | Silent            | SOCS6       | p.S124S  | suppressor of cytokine s 26 (0.00)   | 26 (0.54)  | 1.44 |
| 11-01 | Gp3 | g.chr6:160103551C>A  | Nonsense Mutation | SOD2        | p.E169*  | superoxide dismutase 2, 50 (0.00)    | 57 (0.19)  | 0.51 |
| 11-01 | Gp3 | g.chr21:34924738G>T  | Missense Mutation | SON         | p.M1067I | SON DNA binding prot 41 (0.00)       | 25 (0.32)  | 0.85 |
| 11-01 | Gp3 | g.chr10:108412140C>T | Splice Site       | SORCS1      | p.E825E  | sortilin-related VPS10 d 50 (0.00)   | 22 (0.36)  | 0.97 |
| 11-01 | Gp3 | g.chr10:106602567G>C | Silent            | SORCS3      | p.T215T  | sortilin-related VPS10 d 25 (0.00)   | 12 (0.58)  | 1.56 |
| 11-01 | Gp3 | g.chr11:121444948A>T | Splice Site       | SORL1       |          | sortilin-related receptor, 33 (0.00) | 30 (0.20)  | 0.53 |
| 11-01 | Gp3 | g.chr11:121461774C>A | Nonsense Mutation | SORL1       | p.C336*  | sortilin-related receptor, 69 (0.00) | 46 (0.20)  | 0.52 |
| 11-01 | Gp3 | g.chr1:109856981G>T  | Missense Mutation | SORT1       | p.L795M  | sortilin 1 58 (0.00)                 | 40 (0.17)  | 0.47 |
| 11-01 | Gp3 | g.chr14:50671052G>A  | Silent            | SOS2        | p.L55L   | son of sevenless homolc 30 (0.00)    | 46 (0.17)  | 0.46 |

|       |     |                     |                   |            |          |                           |            |            |      |
|-------|-----|---------------------|-------------------|------------|----------|---------------------------|------------|------------|------|
| 11-01 | Gp3 | g.chr1:204091074G>C | Silent            | SOX13      | p.V274V  | SRY (sex determining r    | 37 (0.00)  | 26 (0.19)  | 0.51 |
| 11-01 | Gp3 | g.chr12:23818492C>G | Missense Mutation | SOX5       | p.G263R  | SRY (sex determining r    | 126 (0.00) | 71 (0.24)  | 0.64 |
| 11-01 | Gp3 | g.chr11:16208421G>C | Missense Mutation | SOX6       | p.L206V  | SRY (sex determining r    | 129 (0.00) | 59 (0.37)  | 0.99 |
| 11-01 | Gp3 | g.chr1:118584556G>A | Missense Mutation | SPAG17     | p.A975V  | sperm associated antige   | 109 (0.00) | 23 (0.26)  | 0.70 |
| 11-01 | Gp3 | g.chr17:26905693G>T | Silent            | SPAG5      | p.L1065L | sperm associated antige   | 71 (0.00)  | 33 (0.21)  | 0.57 |
| 11-01 | Gp3 | g.chr17:49071194G>T | Missense Mutation | SPAG9      | p.Q763K  | sperm associated antige   | 46 (0.00)  | 21 (0.24)  | 0.63 |
| 11-01 | Gp3 | g.chr17:49075848G>A | Missense Mutation | SPAG9      | p.L585F  | sperm associated antige   | 69 (0.00)  | 37 (0.24)  | 0.65 |
| 11-01 | Gp3 | g.chr5:151047047G>A | Missense Mutation | SPARC      | p.T189I  | secreted protein, acidic, | 26 (0.00)  | 13 (0.54)  | 1.44 |
| 11-01 | Gp3 | g.chr4:88414882G>A  | Missense Mutation | SPARCL1    | p.A232V  | SPARC-like 1 (hevin)      | 47 (0.00)  | 34 (0.18)  | 0.47 |
| 11-01 | Gp3 | g.chr17:48632670C>T | Silent            | SPATA20    | p.N745N  | spermatogenesis associa   | 28 (0.00)  | 50 (0.40)  | 1.07 |
| 11-01 | Gp3 | g.chr9:40701757C>A  | Missense Mutation | SPATA31A3  | p.H79Q   | SPATA31 subfamily A,      | 61 (0.00)  | 21 (0.24)  | 0.63 |
| 11-01 | Gp3 | g.chr9:65506462C>A  | Missense Mutation | SPATA31A7  | p.L366F  | SPATA31 subfamily A,      | 152 (0.00) | 28 (0.43)  | 1.14 |
| 11-01 | Gp3 | g.chr9:84607970C>A  | Missense Mutation | SPATA31D1  | p.S862Y  | SPATA31 subfamily D,      | 80 (0.00)  | 35 (0.20)  | 0.53 |
| 11-01 | Gp3 | g.chr9:84609615G>A  | Silent            | SPATA31D1  | p.R1410R | SPATA31 subfamily D,      | 102 (0.00) | 63 (0.14)  | 0.38 |
| 11-01 | Gp3 | g.chr9:84530553C>T  | RNA               | SPATA31D5P |          | SPATA31 subfamily D,      | 107 (0.00) | 126 (0.15) | 0.40 |
| 11-01 | Gp3 | g.chr9:84531501G>A  | RNA               | SPATA31D5P |          | SPATA31 subfamily D,      | 56 (0.00)  | 34 (0.15)  | 0.39 |
| 11-01 | Gp3 | g.chr9:84531761C>A  | RNA               | SPATA31D5P |          | SPATA31 subfamily D,      | 62 (0.00)  | 25 (0.20)  | 0.53 |
| 11-01 | Gp3 | g.chr9:90501738G>A  | Missense Mutation | SPATA31E1  | p.G779D  | SPATA31 subfamily E,      | 120 (0.01) | 54 (0.19)  | 0.49 |
| 11-01 | Gp3 | g.chr9:90501757G>A  | Silent            | SPATA31E1  | p.V785V  | SPATA31 subfamily E,      | 117 (0.00) | 52 (0.17)  | 0.46 |
| 11-01 | Gp3 | g.chr2:169730191C>T | Missense Mutation | SPC25      | p.E152K  | SPC25, NDC80 kinetoc      | 18 (0.00)  | 42 (0.17)  | 0.44 |
| 11-01 | Gp3 | g.chr17:8660607G>A  | Missense Mutation | SPDYE4     | p.H105Y  | speedy/RINGO cell cyc     | 48 (0.00)  | 27 (0.26)  | 0.69 |
| 11-01 | Gp3 | g.chr22:24730458G>A | Missense Mutation | SPECC1L    | p.G826E  | sperm antigen with calp   | 71 (0.00)  | 45 (0.71)  | 1.90 |
| 11-01 | Gp3 | g.chr5:35753823C>T  | Missense Mutation | SPEF2      | p.T1138I | sperm flagellar 2         | 48 (0.00)  | 31 (0.19)  | 0.52 |
| 11-01 | Gp3 | g.chr5:35793286C>G  | Missense Mutation | SPEF2      | p.T1522R | sperm flagellar 2         | 26 (0.00)  | 19 (0.32)  | 0.84 |
| 11-01 | Gp3 | g.chr5:35793290C>G  | Silent            | SPEF2      | p.V1523V | sperm flagellar 2         | 27 (0.00)  | 19 (0.32)  | 0.84 |
| 11-01 | Gp3 | g.chr5:35807354C>G  | Splice Site       | SPEF2      | p.P1788R | sperm flagellar 2         | 73 (0.00)  | 33 (0.42)  | 1.13 |
| 11-01 | Gp3 | g.chr1:16199523C>T  | Missense Mutation | SPEN       | p.S99F   | spen family transcriptio  | 18 (0.00)  | 23 (0.65)  | 1.74 |
| 11-01 | Gp3 | g.chr1:16261746G>A  | Missense Mutation | SPEN       | p.G3004E | spen family transcriptio  | 27 (0.00)  | 28 (0.21)  | 0.57 |
| 11-01 | Gp3 | g.chr2:228881492G>A | Missense Mutation | SPHKAP     | p.P1360S | SPHK1 interactor, AKA     | 25 (0.00)  | 30 (0.20)  | 0.53 |
| 11-01 | Gp3 | g.chr9:91090080C>A  | Nonsense Mutation | SPIN1      | p.S226*  | spindlin 1                | 29 (0.00)  | 17 (0.29)  | 0.78 |
| 11-01 | Gp3 | g.chr5:147496007G>A | Missense Mutation | SPINK5     | p.G697D  | serine peptidase inhibito | 34 (0.00)  | 26 (0.42)  | 1.13 |
| 11-01 | Gp3 | g.chr5:147496025C>G | Missense Mutation | SPINK5     | p.T703S  | serine peptidase inhibito | 38 (0.00)  | 24 (0.46)  | 1.22 |
| 11-01 | Gp3 | g.chr20:55906926G>C | Missense Mutation | SPO11      | p.D57H   | SPO11 meiotic protein c   | 38 (0.00)  | 28 (0.18)  | 0.48 |
| 11-01 | Gp3 | g.chr17:47701627G>A | Intron            | SPOP       |          | speckle-type POZ protei   | 55 (0.00)  | 29 (0.24)  | 0.64 |
| 11-01 | Gp3 | g.chr17:47706019C>A | Intron            | SPOP       |          | speckle-type POZ protei   | 49 (0.00)  | 27 (0.19)  | 0.49 |



|       |     |                      |                   |         |          |                           |            |            |      |
|-------|-----|----------------------|-------------------|---------|----------|---------------------------|------------|------------|------|
| 11-01 | Gp3 | g.chr17:47711492T>A  | Intron            | SPOP    |          | speckle-type POZ protei   | 31 (0.00)  | 11 (0.45)  | 1.21 |
| 11-01 | Gp3 | g.chr17:47720198G>A  | Intron            | SPOP    |          | speckle-type POZ protei   | 67 (0.00)  | 55 (0.29)  | 0.78 |
| 11-01 | Gp3 | g.chr17:47729786G>C  | Intron            | SPOP    |          | speckle-type POZ protei   | 33 (0.00)  | 18 (0.33)  | 0.89 |
| 11-01 | Gp3 | g.chr17:47731607C>G  | Intron            | SPOP    |          | speckle-type POZ protei   | 51 (0.00)  | 38 (0.16)  | 0.42 |
| 11-01 | Gp3 | g.chr17:47735971G>C  | Intron            | SPOP    |          | speckle-type POZ protei   | 63 (0.02)  | 50 (0.34)  | 0.91 |
| 11-01 | Gp3 | g.chr17:47739021C>T  | Intron            | SPOP    |          | speckle-type POZ protei   | 80 (0.00)  | 63 (0.22)  | 0.59 |
| 11-01 | Gp3 | g.chr17:47749601C>T  | Intron            | SPOP    |          | speckle-type POZ protei   | 48 (0.00)  | 58 (0.21)  | 0.55 |
| 11-01 | Gp3 | g.chr15:38643514G>A  | Silent            | SPRED1  | p.E328E  | sprouty-related, EVH1 c   | 69 (0.00)  | 38 (0.16)  | 0.42 |
| 11-01 | Gp3 | g.chr15:38643590G>A  | Missense Mutation | SPRED1  | p.D354N  | sprouty-related, EVH1 c   | 100 (0.00) | 43 (0.19)  | 0.50 |
| 11-01 | Gp3 | g.chr1:153012802C>G  | Missense Mutation | SPRR2D  | p.Q7H    | small proline-rich protei | 54 (0.00)  | 20 (0.50)  | 1.33 |
| 11-01 | Gp3 | g.chr1:158647576G>C  | Silent            | SPTA1   | p.L287L  | spectrin, alpha, erythro  | 31 (0.00)  | 22 (0.27)  | 0.73 |
| 11-01 | Gp3 | g.chr1:158650450C>T  | Missense Mutation | SPTA1   | p.E201K  | spectrin, alpha, erythro  | 37 (0.00)  | 21 (0.29)  | 0.76 |
| 11-01 | Gp3 | g.chr9:131383491C>T  | Missense Mutation | SPTAN1  | p.R1925C | spectrin, alpha, non-eryt | 49 (0.00)  | 34 (0.15)  | 0.39 |
| 11-01 | Gp3 | g.chr2:54872518G>A   | Silent            | SPTBN1  | p.L1474L | spectrin, beta, non-eryth | 18 (0.00)  | 21 (0.43)  | 1.14 |
| 11-01 | Gp3 | g.chr2:54882305G>A   | Missense Mutation | SPTBN1  | p.G1974E | spectrin, beta, non-eryth | 26 (0.00)  | 19 (0.32)  | 0.84 |
| 11-01 | Gp3 | g.chr11:66458772G>A  | Nonsense Mutation | SPTBN2  | p.Q1850* | spectrin, beta, non-eryth | 47 (0.00)  | 62 (0.18)  | 0.47 |
| 11-01 | Gp3 | g.chr19:41077930G>A  | Nonsense Mutation | SPTBN4  | p.W2442* | spectrin, beta, non-eryth | 81 (0.00)  | 29 (0.21)  | 0.55 |
| 11-01 | Gp3 | g.chr15:42144849G>T  | Missense Mutation | SPTBN5  | p.Q3478K | spectrin, beta, non-eryth | 71 (0.00)  | 45 (0.22)  | 0.59 |
| 11-01 | Gp3 | g.chr15:42165759C>T  | Silent            | SPTBN5  | p.R1646R | spectrin, beta, non-eryth | 31 (0.00)  | 36 (0.33)  | 0.89 |
| 11-01 | Gp3 | g.chr15:45968449G>C  | Missense Mutation | SQRDL   | p.D269H  | sulfide quinone reductas  | 76 (0.00)  | 37 (0.16)  | 0.43 |
| 11-01 | Gp3 | g.chr22:42266957G>A  | Missense Mutation | SREBF2  | p.G262D  | sterol regulatory elemen  | 89 (0.00)  | 59 (0.24)  | 0.63 |
| 11-01 | Gp3 | g.chr1:144014117C>T  | RNA               | SRGAP2B |          | SLIT-ROBO Rho GTPa        | 34 (0.00)  | 31 (0.16)  | 0.43 |
| 11-01 | Gp3 | g.chr11:126137484C>G | Missense Mutation | SRPR    | p.G81R   | signal recognition partic | 32 (0.00)  | 19 (0.32)  | 0.84 |
| 11-01 | Gp3 | g.chr3:133534479G>A  | Silent            | SRPRB   | p.V152V  | signal recognition partic | 22 (0.00)  | 15 (0.87)  | 2.31 |
| 11-01 | Gp3 | g.chrX:99924277G>A   | Silent            | SRPX2   | p.V376V  | sushi-repeat containing j | 33 (0.00)  | 36 (0.25)  | 0.42 |
| 11-01 | Gp3 | g.chr17:2224681G>C   | Missense Mutation | SRR     | p.A161P  | serine racemase           | 82 (0.00)  | 72 (0.24)  | 0.63 |
| 11-01 | Gp3 | g.chr1:24993367G>A   | Missense Mutation | SRRM1   | p.A564T  | serine/arginine repetitiv | 38 (0.00)  | 41 (0.15)  | 0.39 |
| 11-01 | Gp3 | g.chr17:56082798G>A  | Missense Mutation | SRSF1   | p.P239L  | serine/arginine-rich spli | 46 (0.02)  | 51 (0.33)  | 0.89 |
| 11-01 | Gp3 | g.chr2:170665054G>T  | Missense Mutation | SSB     | p.R206I  | Sjogren syndrome antig    | 67 (0.00)  | 35 (0.23)  | 0.61 |
| 11-01 | Gp3 | g.chr19:56011269G>C  | Missense Mutation | SSC5D   | p.G598R  | scavenger receptor cyste  | 37 (0.00)  | 53 (0.19)  | 0.50 |
| 11-01 | Gp3 | g.chr19:56011370G>A  | Nonsense Mutation | SSC5D   | p.W631*  | scavenger receptor cyste  | 30 (0.00)  | 19 (0.37)  | 0.98 |
| 11-01 | Gp3 | g.chr17:27957960C>T  | Missense Mutation | SSH2    | p.V1391M | slingshot protein phosph  | 43 (0.02)  | 25 (0.40)  | 1.07 |
| 11-01 | Gp3 | g.chr17:27975232G>A  | Nonsense Mutation | SSH2    | p.R426*  | slingshot protein phosph  | 52 (0.00)  | 27 (0.19)  | 0.49 |
| 11-01 | Gp3 | g.chr7:149493510C>T  | RNA               | SSPO    |          | SCO-spondin               | 115 (0.00) | 171 (0.16) | 0.44 |
| 11-01 | Gp3 | g.chrX:48123243C>T   | Silent            | SSX1    | p.D119D  | synovial sarcoma, X bre   | 56 (0.02)  | 32 (0.38)  | 0.62 |

|       |     |                      |                   |             |          |                            |            |            |      |
|-------|-----|----------------------|-------------------|-------------|----------|----------------------------|------------|------------|------|
| 11-01 | Gp3 | g.chr1:44303978C>A   | Missense Mutation | ST3GAL3     | p.F99L   | ST3 beta-galactoside al    | 64 (0.00)  | 42 (0.19)  | 0.51 |
| 11-01 | Gp3 | g.chr11:8720484C>A   | Missense Mutation | ST5         | p.R492L  | suppression of tumorige    | 90 (0.00)  | 48 (0.19)  | 0.50 |
| 11-01 | Gp3 | g.chr11:8751632G>A   | Missense Mutation | ST5         | p.P402L  | suppression of tumorige    | 92 (0.00)  | 70 (0.16)  | 0.42 |
| 11-01 | Gp3 | g.chr11:8752074G>A   | Missense Mutation | ST5         | p.R255W  | suppression of tumorige    | 22 (0.00)  | 41 (0.20)  | 0.52 |
| 11-01 | Gp3 | g.chr2:107459912C>T  | Silent            | ST6GAL2     | p.K174K  | ST6 beta-galactosamide     | 28 (0.00)  | 47 (0.19)  | 0.51 |
| 11-01 | Gp3 | g.chr9:130658583G>T  | Missense Mutation | ST6GALNAC   | p.P19T   | ST6 (alpha-N-acetyl-ne     | 19 (0.00)  | 16 (0.38)  | 1.00 |
| 11-01 | Gp3 | g.chr7:116771961G>A  | Silent            | ST7         | p.E196E  | suppression of tumorige    | 52 (0.00)  | 27 (0.59)  | 1.58 |
| 11-01 | Gp3 | g.chr15:93007574G>A  | Missense Mutation | ST8SIA2     | p.A363T  | ST8 alpha-N-acetyl-neu     | 60 (0.02)  | 39 (0.33)  | 0.89 |
| 11-01 | Gp3 | g.chr3:136141326C>T  | Missense Mutation | STAG1       | p.D655N  | stromal antigen 1          | 131 (0.00) | 45 (0.22)  | 0.59 |
| 11-01 | Gp3 | g.chr7:99786463C>T   | Missense Mutation | STAG3       | p.P180L  | stromal antigen 3          | 20 (0.00)  | 17 (0.35)  | 0.94 |
| 11-01 | Gp3 | g.chr7:99797859G>A   | Splice Site       | STAG3       | p.G560S  | stromal antigen 3          | 31 (0.00)  | 29 (0.21)  | 0.55 |
| 11-01 | Gp3 | g.chr7:38256671C>A   | Missense Mutation | STARD3NL    | p.L143I  | STARD3 N-terminal lik      | 124 (0.00) | 98 (0.28)  | 0.73 |
| 11-01 | Gp3 | g.chr15:42977889G>A  | Silent            | STARD9      | p.G1371G | StAR-related lipid trans   | 92 (0.00)  | 34 (0.15)  | 0.39 |
| 11-01 | Gp3 | g.chr2:191905858G>A  | Missense Mutation | STAT4       | p.T423I  | signal transducer and ac   | 69 (0.00)  | 19 (0.37)  | 0.98 |
| 11-01 | Gp3 | g.chr2:120005539G>C  | Silent            | STEAP3      | p.L259L  | STEAP family member        | 37 (0.00)  | 48 (0.15)  | 0.39 |
| 11-01 | Gp3 | g.chr7:87908787C>A   | Missense Mutation | STEAP4      | p.V436F  | STEAP family member        | 47 (0.00)  | 34 (0.29)  | 0.78 |
| 11-01 | Gp3 | g.chr4:26959288C>A   | Missense Mutation | STIM2       | p.H113N  | stromal interaction mole   | 24 (0.00)  | 14 (0.50)  | 1.33 |
| 11-01 | Gp3 | g.chr2:220473879G>C  | Missense Mutation | STK11IP     | p.D624H  | serine/threonine kinase    | 31 (0.00)  | 39 (0.15)  | 0.41 |
| 11-01 | Gp3 | g.chr2:242438722G>T  | Missense Mutation | STK25       | p.P179T  | serine/threonine kinase    | 25 (0.00)  | 22 (0.32)  | 0.85 |
| 11-01 | Gp3 | g.chr7:23751900G>A   | Missense Mutation | STK31       | p.A49T   | serine/threonine kinase    | 40 (0.00)  | 22 (0.41)  | 1.09 |
| 11-01 | Gp3 | g.chr2:219540778C>G  | Missense Mutation | STK36       | p.T154R  | serine/threonine kinase    | 73 (0.00)  | 45 (0.22)  | 0.59 |
| 11-01 | Gp3 | g.chr6:36463687G>T   | Silent            | STK38       | p.A424A  | serine/threonine kinase    | 153 (0.00) | 81 (0.15)  | 0.40 |
| 11-01 | Gp3 | g.chr1:36809024G>A   | Missense Mutation | STK40       | p.P344S  | serine/threonine kinase    | 32 (0.00)  | 18 (0.44)  | 1.19 |
| 11-01 | Gp3 | g.chr9:124111602C>A  | Splice Site       | STOM        |          | stomatin                   | 28 (0.00)  | 21 (0.29)  | 0.76 |
| 11-01 | Gp3 | g.chr2:48808017C>T   | Missense Mutation | STON1       | p.S82F   | stonin 1                   | 42 (0.00)  | 18 (0.50)  | 1.33 |
| 11-01 | Gp3 | g.chr14:81743659G>C  | Missense Mutation | STON2       | p.P666A  | stonin 2                   | 29 (0.00)  | 15 (0.47)  | 1.24 |
| 11-01 | Gp3 | g.chr2:202343101G>A  | Missense Mutation | STRADB      | p.G283S  | STE20-related kinase ac    | 69 (0.00)  | 16 (0.38)  | 1.00 |
| 11-01 | Gp3 | g.chr7:129094038A>T  | Missense Mutation | STRIP2      | p.S196C  | striatin interacting prote | 24 (0.00)  | 20 (0.35)  | 0.93 |
| 11-01 | Gp3 | g.chr14:31404368C>G  | Splice Site       | STRN3       |          | striatin, calmodulin bind  | 86 (0.00)  | 64 (0.22)  | 0.58 |
| 11-01 | Gp3 | g.chr11:125484218G>A | Splice Site       | STT3A       |          | STT3A, subunit of the o    | 208 (0.00) | 179 (0.26) | 0.69 |
| 11-01 | Gp3 | g.chr20:57243177C>A  | Silent            | STX16-NPEPL | p.I129I  | STX16-NPEPL1 readth        | 39 (0.00)  | 22 (0.36)  | 0.97 |
| 11-01 | Gp3 | g.chr3:93733920G>T   | Missense Mutation | STX19       | p.A65E   | syntaxin 19                | 30 (0.00)  | 44 (0.16)  | 0.42 |
| 11-01 | Gp3 | g.chr6:132792621C>A  | Missense Mutation | STX7        | p.R123I  | syntaxin 7                 | 77 (0.00)  | 29 (0.28)  | 0.74 |
| 11-01 | Gp3 | g.chr19:48387043C>T  | Splice Site       | SULT2A1     |          | sulfotransferase family,   | 22 (0.00)  | 34 (0.21)  | 0.55 |
| 11-01 | Gp3 | g.chr7:56136314C>T   | Silent            | SUMF2       | p.V69V   | sulfatase modifying fact   | 27 (0.00)  | 23 (0.22)  | 0.58 |

|       |     |                      |                   |         |          |                           |            |            |      |
|-------|-----|----------------------|-------------------|---------|----------|---------------------------|------------|------------|------|
| 11-01 | Gp3 | g.chr6:44921155C>G   | Splice Site       | SUPT3H  |          | suppressor of Ty 3 hom    | 96 (0.00)  | 57 (0.16)  | 0.42 |
| 11-01 | Gp3 | g.chr17:27008316C>T  | Silent            | SUPT6H  | p.Y464Y  | suppressor of Ty 6 hom    | 30 (0.00)  | 20 (0.50)  | 1.33 |
| 11-01 | Gp3 | g.chr10:70945784G>A  | Missense Mutation | SUPV3L1 | p.E105K  | suppressor of var1, 3-lik | 83 (0.00)  | 34 (0.21)  | 0.55 |
| 11-01 | Gp3 | g.chr9:136199150G>T  | Missense Mutation | SURF6   | p.A214E  | surfeit 6                 | 34 (0.00)  | 70 (0.17)  | 0.46 |
| 11-01 | Gp3 | g.chr9:114860943C>T  | Splice Site       | SUSD1   |          | sushi domain containing   | 28 (0.00)  | 22 (0.23)  | 0.61 |
| 11-01 | Gp3 | g.chr22:24583547C>T  | Missense Mutation | SUSD2   | p.H634Y  | sushi domain containing   | 33 (0.00)  | 75 (0.19)  | 0.50 |
| 11-01 | Gp3 | g.chr5:75490887G>T   | Missense Mutation | SV2C    | p.G242C  | synaptic vesicle glycopr  | 121 (0.01) | 117 (0.15) | 0.39 |
| 11-01 | Gp3 | g.chr5:75594750C>A   | Missense Mutation | SV2C    | p.T545K  | synaptic vesicle glycopr  | 54 (0.00)  | 25 (0.28)  | 0.75 |
| 11-01 | Gp3 | g.chr5:75597330C>T   | Missense Mutation | SV2C    | p.L654F  | synaptic vesicle glycopr  | 82 (0.01)  | 55 (0.18)  | 0.48 |
| 11-01 | Gp3 | g.chr9:113168874G>T  | Nonsense Mutation | SVEP1   | p.C2979* | sushi, von Willebrand f   | 32 (0.00)  | 26 (0.27)  | 0.72 |
| 11-01 | Gp3 | g.chr9:113169077C>G  | Missense Mutation | SVEP1   | p.G2912R | sushi, von Willebrand f   | 96 (0.00)  | 42 (0.40)  | 1.08 |
| 11-01 | Gp3 | g.chr9:113171134C>A  | Missense Mutation | SVEP1   | p.R2226L | sushi, von Willebrand f   | 39 (0.00)  | 25 (0.56)  | 1.49 |
| 11-01 | Gp3 | g.chr6:10955415C>T   | Missense Mutation | SYCP2L  | p.S674F  | synaptonemal complex      | 70 (0.00)  | 48 (0.15)  | 0.39 |
| 11-01 | Gp3 | g.chr3:12112913G>A   | RNA               | SYN2    |          | synapsin II               | 34 (0.00)  | 39 (0.38)  | 1.03 |
| 11-01 | Gp3 | g.chr1:33160576G>T   | Missense Mutation | SYNC    | p.L375M  | syncoilin, intermediate   | 62 (0.00)  | 42 (0.17)  | 0.44 |
| 11-01 | Gp3 | g.chr6:152621896G>A  | Silent            | SYNE1   | p.H5854H | spectrin repeat containir | 41 (0.00)  | 56 (0.14)  | 0.38 |
| 11-01 | Gp3 | g.chr14:64540793C>T  | Missense Mutation | SYNE2   | p.T3635I | spectrin repeat containir | 76 (0.00)  | 55 (0.22)  | 0.58 |
| 11-01 | Gp3 | g.chr14:95932427G>T  | Silent            | SYNE3   | p.A156A  | spectrin repeat containir | 35 (0.00)  | 54 (0.15)  | 0.40 |
| 11-01 | Gp3 | g.chr21:34011378G>A  | Missense Mutation | SYNJ1   | p.S1291F | synaptojanin 1            | 32 (0.00)  | 25 (0.20)  | 0.53 |
| 11-01 | Gp3 | g.chr21:34029338C>T  | Missense Mutation | SYNJ1   | p.A891T  | synaptojanin 1            | 50 (0.00)  | 43 (0.16)  | 0.43 |
| 11-01 | Gp3 | g.chr15:99671257C>G  | Missense Mutation | SYNM    | p.L612V  | synemin, intermediate fi  | 63 (0.00)  | 46 (0.15)  | 0.41 |
| 11-01 | Gp3 | g.chr15:99673001C>T  | Missense Mutation | SYNM    | p.A881V  | synemin, intermediate fi  | 71 (0.00)  | 42 (0.19)  | 0.51 |
| 11-01 | Gp3 | g.chr12:79693296G>A  | Missense Mutation | SYT1    | p.E259K  | synaptotagmin I           | 156 (0.01) | 70 (0.14)  | 0.38 |
| 11-01 | Gp3 | g.chr16:19234398C>T  | Missense Mutation | SYT17   | p.S267L  | synaptotagmin XVII        | 40 (0.00)  | 22 (0.27)  | 0.73 |
| 11-01 | Gp3 | g.chr18:40850408G>A  | Silent            | SYT4    | p.V392V  | synaptotagmin IV          | 82 (0.00)  | 58 (0.45)  | 1.20 |
| 11-01 | Gp3 | g.chr18:40854059G>C  | Missense Mutation | SYT4    | p.P112R  | synaptotagmin IV          | 74 (0.00)  | 61 (0.33)  | 0.87 |
| 11-01 | Gp3 | g.chr11:85411607G>A  | Silent            | SYTL2   | p.N769N  | synaptotagmin-like 2      | 19 (0.00)  | 19 (0.47)  | 1.26 |
| 11-01 | Gp3 | g.chrX:99955986C>T   | Missense Mutation | SYTL4   | p.R149K  | synaptotagmin-like 4      | 19 (0.00)  | 19 (0.32)  | 0.53 |
| 11-01 | Gp3 | g.chr1:43903151C>T   | Nonsense Mutation | SZT2    | p.R2031* | seizure threshold 2 hom   | 61 (0.00)  | 47 (0.30)  | 0.79 |
| 11-01 | Gp3 | g.chr6:132938814C>A  | Silent            | TAAR2   | p.G132G  | trace amine associated r  | 43 (0.00)  | 30 (0.20)  | 0.53 |
| 11-01 | Gp3 | g.chr6:132910018T>A  | Missense Mutation | TAAR5   | p.I270L  | trace amine associated r  | 52 (0.02)  | 58 (0.17)  | 0.46 |
| 11-01 | Gp3 | g.chr6:132891849G>A  | Missense Mutation | TAAR6   | p.R130K  | trace amine associated r  | 90 (0.00)  | 37 (0.22)  | 0.58 |
| 11-01 | Gp3 | g.chr6:149691182C>A  | Silent            | TAB2    | p.R17R   | TGF-beta activated kina   | 60 (0.00)  | 41 (0.17)  | 0.46 |
| 11-01 | Gp3 | g.chr10:123843441G>T | Nonsense Mutation | TACC2   | p.G476*  | transforming, acidic coil | 66 (0.00)  | 47 (0.21)  | 0.57 |
| 11-01 | Gp3 | g.chr10:123843447A>T | Nonsense Mutation | TACC2   | p.K478*  | transforming, acidic coil | 66 (0.02)  | 48 (0.23)  | 0.61 |

|       |     |                      |                   |         |          |                           |            |           |      |
|-------|-----|----------------------|-------------------|---------|----------|---------------------------|------------|-----------|------|
| 11-01 | Gp3 | g.chr10:123843936G>A | Missense Mutation | TACC2   | p.A641T  | transforming, acidic coil | 28 (0.00)  | 22 (0.32) | 0.85 |
| 11-01 | Gp3 | g.chr10:123844578G>A | Missense Mutation | TACC2   | p.G855R  | transforming, acidic coil | 163 (0.00) | 80 (0.20) | 0.53 |
| 11-01 | Gp3 | g.chr10:123970420G>A | Silent            | TACC2   | p.E238E  | transforming, acidic coil | 148 (0.00) | 55 (0.25) | 0.68 |
| 11-01 | Gp3 | g.chr10:123976295G>T | Missense Mutation | TACC2   | p.D578Y  | transforming, acidic coil | 99 (0.01)  | 76 (0.41) | 1.09 |
| 11-01 | Gp3 | g.chr10:8006910G>A   | Silent            | TAF3    | p.L479L  | TAF3 RNA polymerase       | 67 (0.00)  | 41 (0.20) | 0.52 |
| 11-01 | Gp3 | g.chr18:23969894G>T  | Missense Mutation | TAF4B   | p.C836F  | TAF4b RNA polymeras       | 88 (0.01)  | 58 (0.26) | 0.69 |
| 11-01 | Gp3 | g.chr11:760138G>A    | Missense Mutation | TALDO1  | p.D116N  | transaldolase 1           | 64 (0.00)  | 30 (0.23) | 0.62 |
| 11-01 | Gp3 | g.chr3:11858677C>T   | Missense Mutation | TAMM41  | p.G233S  | TAM41, mitochondrial      | 84 (0.00)  | 47 (0.19) | 0.51 |
| 11-01 | Gp3 | g.chr2:160087198C>A  | Missense Mutation | TANC1   | p.T1754K | tetratricopeptide repeat, | 64 (0.00)  | 32 (0.19) | 0.50 |
| 11-01 | Gp3 | g.chr2:160087263G>T  | Nonsense Mutation | TANC1   | p.G1776* | tetratricopeptide repeat, | 73 (0.00)  | 34 (0.21) | 0.55 |
| 11-01 | Gp3 | g.chr17:61489029C>A  | Missense Mutation | TANC2   | p.F1175L | tetratricopeptide repeat, | 54 (0.00)  | 66 (0.18) | 0.48 |
| 11-01 | Gp3 | g.chr16:68943221C>A  | Silent            | TANGO6  | p.G636G  | transport and golgi orga  | 81 (0.00)  | 68 (0.15) | 0.39 |
| 11-01 | Gp3 | g.chr16:29990328C>A  | Missense Mutation | TAOK2   | p.A129E  | TAO kinase 2              | 124 (0.00) | 54 (0.15) | 0.40 |
| 11-01 | Gp3 | g.chr1:6639076C>T    | Missense Mutation | TAS1R1  | p.S653L  | taste receptor, type 1, m | 46 (0.00)  | 75 (0.15) | 0.39 |
| 11-01 | Gp3 | g.chr12:10978124A>G  | Missense Mutation | TAS2R10 | p.C249R  | taste receptor, type 2, m | 78 (0.00)  | 54 (0.20) | 0.54 |
| 11-01 | Gp3 | g.chr7:141478496G>T  | Missense Mutation | TAS2R4  | p.V70F   | taste receptor, type 2, m | 68 (0.00)  | 35 (0.14) | 0.38 |
| 11-01 | Gp3 | g.chr8:125506111G>T  | Missense Mutation | TATDN1  | p.H252N  | TatD DNase domain coi     | 61 (0.02)  | 38 (0.16) | 0.42 |
| 11-01 | Gp3 | g.chr8:125535177C>T  | Splice Site       | TATDN1  |          | TatD DNase domain coi     | 67 (0.00)  | 36 (0.17) | 0.44 |
| 11-01 | Gp3 | g.chr10:96269894G>A  | Silent            | TBC1D12 | p.L549L  | TBC1 domain family, nr    | 48 (0.00)  | 41 (0.15) | 0.39 |
| 11-01 | Gp3 | g.chr12:72314522C>T  | Silent            | TBC1D15 | p.T537T  | TBC1 domain family, nr    | 65 (0.00)  | 61 (0.16) | 0.44 |
| 11-01 | Gp3 | g.chr12:65268936G>C  | Missense Mutation | TBC1D30 | p.V552L  | TBC1 domain family, nr    | 85 (0.00)  | 80 (0.28) | 0.73 |
| 11-01 | Gp3 | g.chr6:121427190C>G  | Missense Mutation | TBC1D32 | p.M1148I | TBC1 domain family, nr    | 63 (0.00)  | 29 (0.52) | 0.80 |
| 11-01 | Gp3 | g.chr6:121600267C>A  | Splice Site       | TBC1D32 | p.S578I  | TBC1 domain family, nr    | 53 (0.00)  | 36 (0.44) | 0.69 |
| 11-01 | Gp3 | g.chr17:34590452C>A  | Start Codon SNP   | TBC1D3C | p.M1I    | TBC1 domain family, nr    | 160 (0.01) | 76 (0.24) | 0.63 |
| 11-01 | Gp3 | g.chr2:101656644C>T  | Missense Mutation | TBC1D8  | p.R344K  | TBC1 domain family, nr    | 39 (0.00)  | 15 (0.40) | 1.07 |
| 11-01 | Gp3 | g.chr3:186272730G>C  | Missense Mutation | TBCCD1  | p.H239D  | TBCC domain containir     | 39 (0.00)  | 19 (0.26) | 0.70 |
| 11-01 | Gp3 | g.chr17:80724152T>C  | Missense Mutation | TBCD    | p.Y115H  | tubulin folding cofactor  | 79 (0.00)  | 19 (0.26) | 0.70 |
| 11-01 | Gp3 | g.chr11:67402720C>A  | Missense Mutation | TBX10   | p.G8C    | T-box 10                  | 34 (0.00)  | 62 (0.18) | 0.47 |
| 11-01 | Gp3 | g.chr1:168262423C>A  | Missense Mutation | TBX19   | p.H170Q  | T-box 19                  | 21 (0.00)  | 40 (0.20) | 0.53 |
| 11-01 | Gp3 | g.chr1:168274295C>A  | Missense Mutation | TBX19   | p.N259K  | T-box 19                  | 66 (0.02)  | 28 (0.21) | 0.57 |
| 11-01 | Gp3 | g.chr12:114837349C>T | Missense Mutation | TBX5    | p.D111N  | T-box 5                   | 109 (0.00) | 47 (0.32) | 0.85 |
| 11-01 | Gp3 | g.chr7:139706946T>A  | Missense Mutation | TBXAS1  | p.I397N  | thromboxane A synthas     | 85 (0.00)  | 38 (0.34) | 0.91 |
| 11-01 | Gp3 | g.chrX:102508766C>T  | Missense Mutation | TCEAL8  | p.G48R   | transcription elongation  | 49 (0.00)  | 21 (0.24) | 0.40 |
| 11-01 | Gp3 | g.chr1:24078283G>A   | Missense Mutation | TCEB3   | p.M396I  | transcription elongation  | 63 (0.00)  | 32 (0.25) | 0.67 |
| 11-01 | Gp3 | g.chr1:24080655C>T   | Nonsense Mutation | TCEB3   | p.Q535*  | transcription elongation  | 85 (0.00)  | 75 (0.24) | 0.64 |

|       |     |                      |                   |         |          |                                     |            |           |      |
|-------|-----|----------------------|-------------------|---------|----------|-------------------------------------|------------|-----------|------|
| 11-01 | Gp3 | g.chr15:57545504C>A  | Silent            | TCF12   | p.I435I  | transcription factor 12             | 37 (0.00)  | 21 (0.43) | 1.14 |
| 11-01 | Gp3 | g.chr15:57555353C>A  | Silent            | TCF12   | p.I542I  | transcription factor 12             | 37 (0.00)  | 18 (0.28) | 0.74 |
| 11-01 | Gp3 | g.chr15:57555365C>A  | Missense Mutation | TCF12   | p.N546K  | transcription factor 12             | 38 (0.00)  | 17 (0.29) | 0.78 |
| 11-01 | Gp3 | g.chr22:42607146T>A  | Missense Mutation | TCF20   | p.K1389M | transcription factor 20             | 19 (0.00)  | 16 (0.50) | 1.33 |
| 11-01 | Gp3 | g.chr22:42607396G>T  | Missense Mutation | TCF20   | p.Q1306K | transcription factor 20             | 20 (0.00)  | 24 (0.75) | 2.00 |
| 11-01 | Gp3 | g.chr22:31013451C>A  | Missense Mutation | TCN2    | p.L355M  | transcobalamin II                   | 23 (0.00)  | 27 (0.26) | 0.41 |
| 11-01 | Gp3 | g.chr6:167790057G>T  | Silent            | TCP10   | p.R185R  | t-complex 10                        | 30 (0.00)  | 19 (0.37) | 0.98 |
| 11-01 | Gp3 | g.chr12:124158178C>A | Missense Mutation | TCTN2   | p.T95K   | tectonic family member 46           | 0.00       | 52 (0.17) | 0.46 |
| 11-01 | Gp3 | g.chr10:97453126G>A  | Missense Mutation | TCTN3   | p.L122F  | tectonic family member 59           | 0.00       | 50 (0.18) | 0.48 |
| 11-01 | Gp3 | g.chr10:115958986G>A | Missense Mutation | TDRD1   | p.E147K  | tudor domain containing 55          | 0.00       | 20 (0.45) | 1.20 |
| 11-01 | Gp3 | g.chr10:115978214C>T | Missense Mutation | TDRD1   | p.P789S  | tudor domain containing 30          | 0.00       | 31 (0.23) | 0.60 |
| 11-01 | Gp3 | g.chr10:115980446G>A | Missense Mutation | TDRD1   | p.E872K  | tudor domain containing 62          | 0.00       | 61 (0.15) | 0.39 |
| 11-01 | Gp3 | g.chr19:33233717G>T  | Missense Mutation | TDRD12  | p.Q117H  | tudor domain containing 84          | 0.00       | 31 (0.29) | 0.77 |
| 11-01 | Gp3 | g.chr2:21360974G>A   | Missense Mutation | TDRD15  | p.R212K  | tudor domain containing 96          | 0.00       | 42 (0.40) | 1.08 |
| 11-01 | Gp3 | g.chr2:21364413C>A   | Silent            | TDRD15  | p.A1358A | tudor domain containing 21          | 0.00       | 21 (0.43) | 1.14 |
| 11-01 | Gp3 | g.chr13:61084813G>A  | Silent            | TDRD3   | p.L262L  | tudor domain containing 171         | 0.00       | 87 (0.17) | 0.46 |
| 11-01 | Gp3 | g.chr1:179603605G>A  | Silent            | TDRD5   | p.K380K  | tudor domain containing 41          | 0.00       | 27 (0.19) | 0.49 |
| 11-01 | Gp3 | g.chr11:121060480C>T | Silent            | TECTA   | p.D2086D | tectorin alpha                      | 31 (0.00)  | 21 (0.33) | 0.89 |
| 11-01 | Gp3 | g.chr10:114053799G>T | Missense Mutation | TECTB   | p.Q217H  | tectorin beta                       | 43 (0.00)  | 49 (0.14) | 0.38 |
| 11-01 | Gp3 | g.chr17:73987556C>T  | Silent            | TEN1    | p.L34L   | TEN1 CST complex subunit 125        | 0.01       | 55 (0.36) | 0.97 |
| 11-01 | Gp3 | g.chr17:73987578G>A  | Missense Mutation | TEN1    | p.V42I   | TEN1 CST complex subunit 130        | 0.00       | 55 (0.18) | 0.48 |
| 11-01 | Gp3 | g.chrX:123775822C>T  | Missense Mutation | TENM1   | p.M632I  | teneurin transmembrane 24           | 0.00       | 27 (0.81) | 1.36 |
| 11-01 | Gp3 | g.chr5:167673981G>A  | Missense Mutation | TENM2   | p.G1774S | teneurin transmembrane 73           | 0.00       | 34 (0.18) | 0.47 |
| 11-01 | Gp3 | g.chr11:78380490C>A  | Silent            | TENM4   | p.V2300V | teneurin transmembrane 79           | 0.00       | 62 (0.21) | 0.56 |
| 11-01 | Gp3 | g.chr14:20837923C>T  | Missense Mutation | TEP1    | p.G2337R | telomerase-associated protein 37    | 0.00       | 20 (0.30) | 0.80 |
| 11-01 | Gp3 | g.chr16:75690408G>T  | Missense Mutation | TERF2IP | p.D367Y  | telomeric repeat binding protein 66 | 0.00       | 66 (0.17) | 0.44 |
| 11-01 | Gp3 | g.chr1:45821011G>A   | Silent            | TESK2   | p.H168H  | testis-specific kinase 2            | 18 (0.00)  | 27 (0.22) | 0.59 |
| 11-01 | Gp3 | g.chr12:55359851G>T  | Missense Mutation | TESPA1  | p.N144K  | thymocyte expressed, protein 56     | 0.00       | 51 (0.18) | 0.47 |
| 11-01 | Gp3 | g.chr10:70450739C>A  | Missense Mutation | TET1    | p.A1860D | tet methylcytosine dioxygenase 46   | 0.02       | 26 (0.19) | 0.51 |
| 11-01 | Gp3 | g.chr4:106158268G>T  | Nonsense Mutation | TET2    | p.E1057* | tet methylcytosine dioxygenase 39   | 0.00       | 35 (0.43) | 1.14 |
| 11-01 | Gp3 | g.chr2:74326583C>T   | Nonsense Mutation | TET3    | p.R1015* | tet methylcytosine dioxygenase 21   | 0.00       | 28 (0.25) | 0.38 |
| 11-01 | Gp3 | g.chr17:56663355G>A  | Silent            | TEX14   | p.S965S  | testis expressed 14                 | 91 (0.00)  | 71 (0.21) | 0.56 |
| 11-01 | Gp3 | g.chr17:62290419C>A  | Missense Mutation | TEX2    | p.G387W  | testis expressed 2                  | 68 (0.00)  | 32 (0.19) | 0.50 |
| 11-01 | Gp3 | g.chr17:62291341G>T  | Silent            | TEX2    | p.P79P   | testis expressed 2                  | 171 (0.00) | 92 (0.14) | 0.38 |
| 11-01 | Gp3 | g.chr22:37387576C>T  | Missense Mutation | TEX33   | p.E231K  | testis expressed 33                 | 94 (0.00)  | 81 (0.16) | 0.43 |

|       |     |                     |                   |               |          |                            |            |            |      |
|-------|-----|---------------------|-------------------|---------------|----------|----------------------------|------------|------------|------|
| 11-01 | Gp3 | g.chr3:133476628G>T | Missense Mutation | TF            | p.D296Y  | transferrin                | 28 (0.00)  | 18 (0.33)  | 0.89 |
| 11-01 | Gp3 | g.chr3:133485235C>A | Missense Mutation | TF            | p.P482T  | transferrin                | 26 (0.00)  | 29 (0.41)  | 1.10 |
| 11-01 | Gp3 | g.chr6:50683011C>T  | Silent            | TFAP2D        | p.F74F   | transcription factor AP-2  | 51 (0.00)  | 37 (0.24)  | 0.65 |
| 11-01 | Gp3 | g.chr16:4312368G>T  | Missense Mutation | TFAP4         | p.T104N  | transcription factor AP-2  | 36 (0.03)  | 56 (0.32)  | 0.86 |
| 11-01 | Gp3 | g.chr16:4312394G>A  | Silent            | TFAP4         | p.Y95Y   | transcription factor AP-2  | 35 (0.03)  | 43 (0.47)  | 1.24 |
| 11-01 | Gp3 | g.chr6:155578979G>A | Silent            | TFB1M         | p.Y344Y  | transcription factor B1    | 149 (0.00) | 41 (0.17)  | 0.46 |
| 11-01 | Gp3 | g.chr21:43771054C>A | Missense Mutation | TFF2          | p.D5Y    | trefoil factor 2           | 15 (0.00)  | 10 (0.50)  | 1.33 |
| 11-01 | Gp3 | g.chr22:26892072C>A | Missense Mutation | TFIP11        | p.A606S  | tuftelin interacting prote | 219 (0.00) | 152 (0.17) | 0.46 |
| 11-01 | Gp3 | g.chr2:188332652G>A | Silent            | TFPI          | p.H212H  | tissue factor pathway inl  | 20 (0.00)  | 16 (0.44)  | 1.17 |
| 11-01 | Gp3 | g.chr19:54610415G>C | Missense Mutation | TFPT          | p.S235C  | TCF3 (E2A) fusion part     | 18 (0.00)  | 19 (0.47)  | 1.26 |
| 11-01 | Gp3 | g.chr3:195782058C>T | Missense Mutation | TFRC          | p.V598M  | transferrin receptor       | 96 (0.00)  | 94 (0.28)  | 0.74 |
| 11-01 | Gp3 | g.chr8:133899496G>T | Nonsense Mutation | TG            | p.E627*  | thyroglobulin              | 57 (0.00)  | 69 (0.43)  | 1.16 |
| 11-01 | Gp3 | g.chr8:133925456G>A | Missense Mutation | TG            | p.E1442K | thyroglobulin              | 16 (0.00)  | 12 (0.58)  | 1.56 |
| 11-01 | Gp3 | g.chr8:134030071C>T | Missense Mutation | TG            | p.S2204F | thyroglobulin              | 24 (0.00)  | 38 (0.18)  | 0.49 |
| 11-01 | Gp3 | g.chr3:30713279G>A  | Missense Mutation | TGFBR2        | p.E202K  | transforming growth fac    | 61 (0.00)  | 37 (0.27)  | 0.72 |
| 11-01 | Gp3 | g.chr3:30713295G>A  | Missense Mutation | TGFBR2        | p.R207Q  | transforming growth fac    | 59 (0.00)  | 39 (0.23)  | 0.62 |
| 11-01 | Gp3 | g.chr20:35207193C>A | Missense Mutation | TGIF2-C20orf2 | p.L6I    | TGIF2-C20orf24 readth      | 36 (0.00)  | 38 (0.21)  | 0.56 |
| 11-01 | Gp3 | g.chr20:36760789G>A | Silent            | TGM2          | p.L577L  | transglutaminase 2         | 36 (0.00)  | 34 (0.41)  | 1.10 |
| 11-01 | Gp3 | g.chr20:36766732G>A | Silent            | TGM2          | p.A466A  | transglutaminase 2         | 36 (0.00)  | 23 (0.22)  | 0.58 |
| 11-01 | Gp3 | g.chr20:2291737A>T  | Missense Mutation | TGM3          | p.T168S  | transglutaminase 3         | 51 (0.00)  | 11 (0.45)  | 1.21 |
| 11-01 | Gp3 | g.chr15:43568686C>A | Missense Mutation | TGM7          | p.K700N  | transglutaminase 7         | 81 (0.00)  | 23 (0.22)  | 0.58 |
| 11-01 | Gp3 | g.chr8:56699292G>C  | Missense Mutation | TGS1          | p.A279P  | trimethylguanosine synt    | 86 (0.00)  | 40 (0.20)  | 0.67 |
| 11-01 | Gp3 | g.chr8:56711632C>A  | Missense Mutation | TGS1          | p.P568T  | trimethylguanosine synt    | 44 (0.00)  | 18 (0.28)  | 0.93 |
| 11-01 | Gp3 | g.chr11:2189381C>T  | Silent            | TH            | p.E203E  | tyrosine hydroxylase       | 23 (0.00)  | 28 (0.18)  | 0.48 |
| 11-01 | Gp3 | g.chr2:43801682G>A  | Missense Mutation | THADA         | p.H508Y  | thyroid adenoma associ     | 70 (0.00)  | 41 (0.15)  | 0.39 |
| 11-01 | Gp3 | g.chr16:67877055G>A | Missense Mutation | THAP11        | p.E200K  | THAP domain containir      | 19 (0.00)  | 48 (0.17)  | 0.44 |
| 11-01 | Gp3 | g.chr2:242572729G>A | Silent            | THAP4         | p.A281A  | THAP domain containir      | 25 (0.00)  | 49 (0.37)  | 0.98 |
| 11-01 | Gp3 | g.chr4:83829077C>A  | Silent            | THAP9         | p.S240S  | THAP domain containir      | 49 (0.00)  | 65 (0.28)  | 0.74 |
| 11-01 | Gp3 | g.chr15:39881440G>A | Missense Mutation | THBS1         | p.G604E  | thrombospondin 1           | 110 (0.00) | 56 (0.21)  | 0.57 |
| 11-01 | Gp3 | g.chr15:39885634C>G | Missense Mutation | THBS1         | p.T1011S | thrombospondin 1           | 74 (0.00)  | 55 (0.25)  | 0.68 |
| 11-01 | Gp3 | g.chr5:79378234G>A  | Missense Mutation | THBS4         | p.R806Q  | thrombospondin 4           | 19 (0.00)  | 21 (0.33)  | 0.89 |
| 11-01 | Gp3 | g.chrX:122866867C>A | Silent            | THOC2         | p.A2A    | THO complex 2              | 22 (0.00)  | 31 (0.39)  | 0.65 |
| 11-01 | Gp3 | g.chr19:2794854T>C  | Missense Mutation | THOP1         | p.F108L  | thimet oligopeptidase      | 145 (0.00) | 45 (0.13)  | 0.44 |
| 11-01 | Gp3 | g.chr17:38244615G>A | Missense Mutation | THRA          | p.V282I  | thyroid hormone recept     | 50 (0.00)  | 52 (0.33)  | 0.87 |
| 11-01 | Gp3 | g.chr1:36759517C>A  | Missense Mutation | THRAP3        | p.P699H  | thyroid hormone recept     | 44 (0.00)  | 37 (0.22)  | 0.58 |

|       |     |                      |                   |          |          |                           |            |            |      |
|-------|-----|----------------------|-------------------|----------|----------|---------------------------|------------|------------|------|
| 11-01 | Gp3 | g.chr1:36766490G>A   | Silent            | THRAP3   | p.K769K  | thyroid hormone receptc   | 69 (0.00)  | 44 (0.18)  | 0.48 |
| 11-01 | Gp3 | g.chr3:24164392C>A   | Nonsense Mutation | THRB     | p.E472*  | thyroid hormone receptc   | 93 (0.00)  | 54 (0.26)  | 0.69 |
| 11-01 | Gp3 | g.chr3:24185104C>G   | Missense Mutation | THRB     | p.G224A  | thyroid hormone receptc   | 66 (0.00)  | 31 (0.29)  | 0.77 |
| 11-01 | Gp3 | g.chr21:32595896C>A  | Missense Mutation | TIAM1    | p.W607C  | T-cell lymphoma invasi    | 84 (0.00)  | 75 (0.15)  | 0.39 |
| 11-01 | Gp3 | g.chr6:155486506C>A  | Missense Mutation | TIAM2    | p.A87D   | T-cell lymphoma invasi    | 32 (0.00)  | 32 (0.16)  | 0.42 |
| 11-01 | Gp3 | g.chr1:43772563G>C   | Silent            | TIE1     | p.L179L  | tyrosine kinase with imr  | 34 (0.00)  | 22 (0.36)  | 0.97 |
| 11-01 | Gp3 | g.chr4:153691553C>T  | Missense Mutation | TIGD4    | p.E202K  | tigger transposable elem  | 62 (0.00)  | 32 (0.16)  | 0.42 |
| 11-01 | Gp3 | g.chr5:149374924G>T  | Missense Mutation | TIGD6    | p.L330I  | tigger transposable elem  | 46 (0.00)  | 26 (0.27)  | 0.72 |
| 11-01 | Gp3 | g.chr5:149375756G>T  | Silent            | TIGD6    | p.T52T   | tigger transposable elem  | 53 (0.00)  | 30 (0.27)  | 0.71 |
| 11-01 | Gp3 | g.chr12:56822406C>A  | Missense Mutation | TIMELESS | p.E445D  | timeless circadian clock  | 15 (0.00)  | 15 (0.33)  | 0.89 |
| 11-01 | Gp3 | g.chr19:39976402G>T  | Silent            | TIMM50   | p.T149T  | translocase of inner mitc | 44 (0.00)  | 28 (0.25)  | 0.67 |
| 11-01 | Gp3 | g.chr15:30011091G>T  | Silent            | TJP1     | p.P1009P | tight junction protein 1  | 79 (0.00)  | 52 (0.19)  | 0.51 |
| 11-01 | Gp3 | g.chr9:71869158C>T   | Silent            | TJP2     | p.S1147S | tight junction protein 2  | 67 (0.00)  | 60 (0.23)  | 0.62 |
| 11-01 | Gp3 | g.chr19:3730685G>A   | Silent            | TJP3     | p.V207V  | tight junction protein 3  | 24 (0.00)  | 49 (0.20)  | 0.54 |
| 11-01 | Gp3 | g.chrX:153555936G>A  | Splice Site       | TKTL1    |          | transketolase-like 1      | 37 (0.00)  | 22 (0.32)  | 0.53 |
| 11-01 | Gp3 | g.chr9:84208125G>T   | Missense Mutation | TLE1     | p.L466I  | transducin-like enhance   | 16 (0.00)  | 30 (0.27)  | 0.87 |
| 11-01 | Gp3 | g.chr10:98146799C>A  | Missense Mutation | TLL2     | p.C588F  | tolloid-like 2            | 36 (0.00)  | 35 (0.23)  | 0.61 |
| 11-01 | Gp3 | g.chr4:187004848G>A  | Missense Mutation | TLR3     | p.E393K  | toll-like receptor 3      | 99 (0.00)  | 48 (0.25)  | 0.67 |
| 11-01 | Gp3 | g.chr1:223283850C>T  | Missense Mutation | TLR5     | p.E842K  | toll-like receptor 5      | 33 (0.00)  | 28 (0.46)  | 1.24 |
| 11-01 | Gp3 | g.chr3:52256399G>A   | Missense Mutation | TLR9     | p.A798V  | toll-like receptor 9      | 37 (0.00)  | 29 (0.21)  | 0.55 |
| 11-01 | Gp3 | g.chr8:38852890C>A   | Missense Mutation | TM2D2    | p.D88Y   | TM2 domain containing     | 25 (0.00)  | 38 (0.26)  | 0.39 |
| 11-01 | Gp3 | g.chr14:24662386C>T  | Missense Mutation | TM9SF1   | p.M354I  | transmembrane 9 super     | 47 (0.00)  | 33 (0.15)  | 0.40 |
| 11-01 | Gp3 | g.chr16:19027802C>A  | Silent            | TMC7     | p.L114L  | transmembrane channel     | 47 (0.00)  | 35 (0.17)  | 0.46 |
| 11-01 | Gp3 | g.chr16:19033117G>A  | Splice Site       | TMC7     | p.M209I  | transmembrane channel     | 48 (0.00)  | 46 (0.17)  | 0.46 |
| 11-01 | Gp3 | g.chr1:20097919G>A   | Missense Mutation | TMCO4    | p.A79V   | transmembrane and coil    | 54 (0.00)  | 105 (0.14) | 0.38 |
| 11-01 | Gp3 | g.chr2:193049181C>G  | Missense Mutation | TMEFF2   | p.G104A  | transmembrane protein     | 46 (0.00)  | 43 (0.16)  | 0.43 |
| 11-01 | Gp3 | g.chr17:7339800C>T   | Missense Mutation | TMEM102  | p.P168S  | transmembrane protein     | 20 (0.00)  | 31 (0.29)  | 0.77 |
| 11-01 | Gp3 | g.chr17:41365186T>A  | Missense Mutation | TMEM106A | p.F42L   | transmembrane protein     | 37 (0.00)  | 25 (0.40)  | 1.07 |
| 11-01 | Gp3 | g.chr11:102272781G>A | Missense Mutation | TMEM123  | p.T105I  | transmembrane protein     | 122 (0.00) | 164 (0.35) | 0.93 |
| 11-01 | Gp3 | g.chr4:4247979G>A    | Silent            | TMEM128  | p.T63T   | transmembrane protein     | 35 (0.00)  | 34 (0.18)  | 0.47 |
| 11-01 | Gp3 | g.chr2:98375490G>A   | Nonsense Mutation | TMEM131  | p.R1745* | transmembrane protein     | 137 (0.00) | 41 (0.56)  | 1.50 |
| 11-01 | Gp3 | g.chr12:126128684G>A | Silent            | TMEM132B | p.T495T  | transmembrane protein     | 59 (0.00)  | 26 (0.27)  | 0.72 |
| 11-01 | Gp3 | g.chr11:87017012C>T  | Missense Mutation | TMEM135  | p.H245Y  | transmembrane protein     | 45 (0.00)  | 68 (0.37)  | 0.98 |
| 11-01 | Gp3 | g.chr19:48836684G>A  | Missense Mutation | TMEM143  | p.S391F  | transmembrane protein     | 16 (0.00)  | 27 (0.33)  | 0.89 |
| 11-01 | Gp3 | g.chr10:104230656C>A | Silent            | TMEM180  | p.L162L  | transmembrane protein     | 15 (0.00)  | 14 (0.36)  | 0.95 |

|       |     |                      |                   |           |          |                                                        |            |            |      |
|-------|-----|----------------------|-------------------|-----------|----------|--------------------------------------------------------|------------|------------|------|
| 11-01 | Gp3 | g.chr12:72094736G>A  | Silent            | TMEM19    | p.L324L  | transmembrane protein 117 (0.00)                       | 28 (0.21)  | 0.57       |      |
| 11-01 | Gp3 | g.chr4:166021870G>A  | Missense Mutation | TMEM192   | p.H117Y  | transmembrane protein 127 (0.00)                       | 38 (0.18)  | 0.49       |      |
| 11-01 | Gp3 | g.chr9:74345767G>T   | Missense Mutation | TMEM2     | p.Q543K  | transmembrane protein 160 (0.00)                       | 50 (0.12)  | 0.39       |      |
| 11-01 | Gp3 | g.chr19:11453535C>A  | Missense Mutation | TMEM205   | p.G176W  | transmembrane protein 151 (0.00)                       | 48 (0.23)  | 0.61       |      |
| 11-01 | Gp3 | g.chr7:129841795G>T  | Silent            | TMEM209   | p.T156T  | transmembrane protein 135 (0.00)                       | 23 (0.30)  | 0.81       |      |
| 11-01 | Gp3 | g.chr7:129841811C>T  | Missense Mutation | TMEM209   | p.S151N  | transmembrane protein 139 (0.00)                       | 26 (0.31)  | 0.82       |      |
| 11-01 | Gp3 | g.chr3:171571529C>T  | Silent            | TMEM212   | p.Y144Y  | transmembrane protein 175 (0.00)                       | 37 (0.32)  | 0.86       |      |
| 11-01 | Gp3 | g.chr7:138487671C>T  | Missense Mutation | TMEM213   | p.R37W   | transmembrane protein 131 (0.00)                       | 32 (0.22)  | 0.58       |      |
| 11-01 | Gp3 | g.chr7:138487710G>A  | Missense Mutation | TMEM213   | p.A50T   | transmembrane protein 134 (0.00)                       | 38 (0.21)  | 0.56       |      |
| 11-01 | Gp3 | g.chr14:93652640G>T  | Missense Mutation | TMEM251   | p.R7L    | transmembrane protein 1107 (0.00)                      | 60 (0.23)  | 0.62       |      |
| 11-01 | Gp3 | g.chr14:93652886G>A  | Missense Mutation | TMEM251   | p.C89Y   | transmembrane protein 136 (0.00)                       | 48 (0.17)  | 0.44       |      |
| 11-01 | Gp3 | g.chr14:57070547C>A  | Missense Mutation | TMEM260   | p.S120Y  | transmembrane protein 1105 (0.00)                      | 110 (0.15) | 0.41       |      |
| 11-01 | Gp3 | g.chr9:108467918G>A  | Nonsense Mutation | TMEM38B   | p.W51*   | transmembrane protein 159 (0.00)                       | 59 (0.19)  | 0.50       |      |
| 11-01 | Gp3 | g.chr9:108468032C>A  | Silent            | TMEM38B   | p.I89I   | transmembrane protein 158 (0.00)                       | 42 (0.40)  | 1.08       |      |
| 11-01 | Gp3 | g.chr12:64202533G>T  | Silent            | TMEM5     | p.P331P  | transmembrane protein 148 (0.00)                       | 50 (0.34)  | 0.91       |      |
| 11-01 | Gp3 | g.chr6:44107455C>T   | Silent            | TMEM63B   | p.A187A  | transmembrane protein 144 (0.00)                       | 35 (0.14)  | 0.38       |      |
| 11-01 | Gp3 | g.chr17:48356637G>C  | Missense Mutation | TMEM92    | p.D150H  | transmembrane protein 153 (0.00)                       | 22 (0.23)  | 0.61       |      |
| 11-01 | Gp3 | g.chr17:38991022G>A  | Missense Mutation | TMEM99    | p.C85Y   | transmembrane protein 133 (0.00)                       | 18 (0.39)  | 1.04       |      |
| 11-01 | Gp3 | g.chr17:28651890C>T  | Missense Mutation | TMIGD1    | p.C195Y  | transmembrane and immunoglobulin-like domain 66 (0.02) | 37 (0.16)  | 0.43       |      |
| 11-01 | Gp3 | g.chr4:68688095G>A   | Missense Mutation | TMPRSS11D | p.T406I  | transmembrane protease 165 (0.00)                      | 122 (0.16) | 0.42       |      |
| 11-01 | Gp3 | g.chr12:51237657C>T  | Nonsense Mutation | TMPRSS12  | p.Q74*   | transmembrane (C-terminal) domain 42 (0.00)            | 48 (0.15)  | 0.39       |      |
| 11-01 | Gp3 | g.chr21:42868254G>A  | Intron            | TMPRSS2   |          | transmembrane protease 100 (0.00)                      | 48 (0.77)  | 0.88       |      |
| 11-01 | Gp3 | g.chr21:42871568C>T  | Intron            | TMPRSS2   |          | transmembrane protease 123 (0.00)                      | 87 (0.16)  | 0.43       |      |
| 11-01 | Gp3 | g.chr21:42878424C>T  | Intron            | TMPRSS2   |          | transmembrane protease 50 (0.00)                       | 70 (0.19)  | 0.50       |      |
| 11-01 | Gp3 | g.chr11:117975428C>A | Silent            | TMPRSS4   | p.S111S  | transmembrane protease 29 (0.00)                       | 23 (0.48)  | 1.28       |      |
| 11-01 | Gp3 | g.chr12:29670490G>A  | Missense Mutation | TMTC1     | p.A742V  | transmembrane and tetra-spanning domain 145 (0.01)     | 95 (0.21)  | 0.56       |      |
| 11-01 | Gp3 | g.chr13:101264750C>T | Missense Mutation | TMTC4     | p.A526T  | transmembrane and tetra-spanning domain 17 (0.00)      | 13 (0.38)  | 1.03       |      |
| 11-01 | Gp3 | g.chr6:138192394G>A  | Silent            | TNFAIP3   | p.L10L   | tumor necrosis factor, alpha 168 (0.00)                | 24 (0.42)  | 1.11       |      |
| 11-01 | Gp3 | g.chr5:118728942G>A  | Missense Mutation | TNFAIP8   | p.V155I  | tumor necrosis factor, alpha 101 (0.00)                | 56 (0.43)  | 1.14       |      |
| 11-01 | Gp3 | g.chr8:22972217G>T   | Missense Mutation | TNFRSF10C | p.G72C   | tumor necrosis factor receptor 37 (0.00)               | 15 (0.33)  | 0.50       |      |
| 11-01 | Gp3 | g.chr1:175066560C>T  | Silent            | TNN       | p.D532D  | tenascin N                                             | 53 (0.00)  | 15 (0.47)  | 1.24 |
| 11-01 | Gp3 | g.chr7:128619098C>T  | Missense Mutation | TNPO3     | p.R601H  | transportin 3                                          | 171 (0.00) | 132 (0.14) | 0.38 |
| 11-01 | Gp3 | g.chr1:175375532C>T  | Missense Mutation | TNR       | p.D107N  | tenascin R                                             | 71 (0.00)  | 45 (0.36)  | 0.95 |
| 11-01 | Gp3 | g.chr7:5396677C>A    | Silent            | TNRC18    | p.L1688L | trinucleotide repeat containing domain 115 (0.00)      | 87 (0.17)  | 0.46       |      |
| 11-01 | Gp3 | g.chr16:24816434C>T  | Missense Mutation | TNRC6A    | p.L1362F | trinucleotide repeat containing domain 76 (0.00)       | 29 (0.24)  | 0.64       |      |



|       |     |                      |                   |          |          |                            |            |            |      |
|-------|-----|----------------------|-------------------|----------|----------|----------------------------|------------|------------|------|
| 11-01 | Gp3 | g.chr22:40657846G>T  | Silent            | TNRC6B   | p.V78V   | trinucleotide repeat cont  | 51 (0.00)  | 28 (0.57)  | 1.52 |
| 11-01 | Gp3 | g.chr7:47436421C>T   | Missense Mutation | TNS3     | p.E334K  | tensin 3                   | 63 (0.00)  | 35 (0.23)  | 0.61 |
| 11-01 | Gp3 | g.chr17:53014475C>A  | Silent            | TOM1L1   | p.T307T  | target of myb1 (chicken    | 49 (0.00)  | 13 (0.38)  | 1.03 |
| 11-01 | Gp3 | g.chr7:22852795C>A   | Missense Mutation | TOMM7    | p.G100V  | translocase of outer mitc  | 41 (0.00)  | 38 (0.16)  | 0.42 |
| 11-01 | Gp3 | g.chr7:22852796C>A   | Missense Mutation | TOMM7    | p.G100W  | translocase of outer mitc  | 41 (0.00)  | 38 (0.16)  | 0.42 |
| 11-01 | Gp3 | g.chr8:145656493G>A  | Silent            | TONSL    | p.H1259H | tonsoku-like, DNA repa     | 26 (0.00)  | 49 (0.22)  | 0.60 |
| 11-01 | Gp3 | g.chr17:38546259G>A  | Silent            | TOP2A    | p.D1475D | topoisomerase (DNA) II     | 44 (0.02)  | 31 (0.19)  | 0.52 |
| 11-01 | Gp3 | g.chr17:38557196C>T  | Missense Mutation | TOP2A    | p.G857D  | topoisomerase (DNA) II     | 112 (0.00) | 82 (0.35)  | 0.94 |
| 11-01 | Gp3 | g.chr17:38564311C>A  | Missense Mutation | TOP2A    | p.V470F  | topoisomerase (DNA) II     | 81 (0.00)  | 75 (0.21)  | 0.57 |
| 11-01 | Gp3 | g.chr3:25665186G>A   | Silent            | TOP2B    | p.F844F  | topoisomerase (DNA) II     | 49 (0.00)  | 33 (0.33)  | 0.89 |
| 11-01 | Gp3 | g.chr16:52473745G>A  | Missense Mutation | TOX3     | p.L375F  | TOX high mobility grou     | 54 (0.00)  | 51 (0.22)  | 0.58 |
| 11-01 | Gp3 | g.chr1:223983888C>A  | Missense Mutation | TP53BP2  | p.A785S  | tumor protein p53 bindi    | 99 (0.00)  | 30 (0.20)  | 0.53 |
| 11-01 | Gp3 | g.chr8:80950439C>G   | Missense Mutation | TPD52    | p.G156A  | tumor protein D52          | 50 (0.00)  | 35 (0.23)  | 0.76 |
| 11-01 | Gp3 | g.chr6:125541243G>A  | Silent            | TPD52L1  | p.P13P   | tumor protein D52-like     | 49 (0.00)  | 10 (0.90)  | 1.40 |
| 11-01 | Gp3 | g.chr12:72372805C>A  | Nonsense Mutation | TPH2     | p.Y293*  | tryptophan hydroxylase     | 115 (0.00) | 74 (0.27)  | 0.72 |
| 11-01 | Gp3 | g.chr9:35684487C>T   | Missense Mutation | TPM2     | p.E234K  | tropomyosin 2 (beta)       | 46 (0.02)  | 40 (0.20)  | 0.53 |
| 11-01 | Gp3 | g.chr1:154143175C>T  | Missense Mutation | TPM3     | p.E219K  | tropomyosin 3              | 62 (0.02)  | 59 (0.20)  | 0.54 |
| 11-01 | Gp3 | g.chr1:186313629C>T  | Missense Mutation | TPR      | p.A1099T | translocated promoter re   | 95 (0.00)  | 46 (0.15)  | 0.41 |
| 11-01 | Gp3 | g.chr1:186316571T>C  | Silent            | TPR      | p.E932E  | translocated promoter re   | 21 (0.00)  | 27 (0.19)  | 0.49 |
| 11-01 | Gp3 | g.chr21:10934045G>T  | Missense Mutation | TPTE     | p.T311N  | transmembrane phospho      | 61 (0.00)  | 30 (0.27)  | 0.71 |
| 11-01 | Gp3 | g.chr7:23547075G>A   | Missense Mutation | TRA2A    | p.T202I  | transformer 2 alpha hor    | 238 (0.00) | 168 (0.23) | 0.62 |
| 11-01 | Gp3 | g.chr2:85066338C>A   | Missense Mutation | TRABD2A  | p.G260V  | TraB domain containing     | 70 (0.00)  | 51 (0.25)  | 0.39 |
| 11-01 | Gp3 | g.chr12:112589810G>C | Missense Mutation | TRAFD1   | p.Q495H  | TRAF-type zinc finger c    | 141 (0.00) | 119 (0.14) | 0.38 |
| 11-01 | Gp3 | g.chr14:22975639G>T  | RNA               | TRAJ35   |          | T cell receptor alpha joi  | 72 (0.00)  | 37 (0.16)  | 0.43 |
| 11-01 | Gp3 | g.chr2:202251118A>G  | Missense Mutation | TRAK2    | p.F596L  | trafficking protein, kine  | 80 (0.00)  | 57 (0.25)  | 0.65 |
| 11-01 | Gp3 | g.chr3:36897423T>A   | Nonsense Mutation | TRANK1   | p.R670*  | tetratricopeptide repeat   | 137 (0.01) | 99 (0.21)  | 0.57 |
| 11-01 | Gp3 | g.chr3:36940729A>G   | Missense Mutation | TRANK1   | p.S58P   | tetratricopeptide repeat   | 27 (0.00)  | 29 (0.24)  | 0.64 |
| 11-01 | Gp3 | g.chr16:3736135C>A   | Silent            | TRAP1    | p.V111V  | TNF receptor-associated    | 32 (0.00)  | 14 (0.36)  | 0.95 |
| 11-01 | Gp3 | g.chr5:64960341G>C   | Missense Mutation | TRAPPC13 | p.G386A  | trafficking protein partic | 42 (0.00)  | 45 (0.16)  | 0.41 |
| 11-01 | Gp3 | g.chr5:64960374C>G   | Missense Mutation | TRAPPC13 | p.T397R  | trafficking protein partic | 39 (0.00)  | 55 (0.15)  | 0.39 |
| 11-01 | Gp3 | g.chr14:22521196C>T  | RNA               | TRAV21   |          | T cell receptor alpha var  | 56 (0.00)  | 27 (0.19)  | 0.49 |
| 11-01 | Gp3 | g.chr14:22217488T>C  | RNA               | TRAV5    |          | T cell receptor alpha var  | 94 (0.00)  | 112 (0.18) | 0.48 |
| 11-01 | Gp3 | g.chr14:22600924C>G  | RNA               | TRAV8-7  |          | T cell receptor alpha var  | 40 (0.00)  | 24 (0.21)  | 0.56 |
| 11-01 | Gp3 | g.chr7:142176437G>A  | RNA               | TRBV7-4  |          | T cell receptor beta vari  | 42 (0.00)  | 25 (0.20)  | 0.53 |
| 11-01 | Gp3 | g.chr7:142239999G>A  | RNA               | TRBV9    |          | T cell receptor beta vari  | 25 (0.00)  | 30 (0.23)  | 0.62 |

|       |     |                      |                   |         |          |                            |            |            |      |
|-------|-----|----------------------|-------------------|---------|----------|----------------------------|------------|------------|------|
| 11-01 | Gp3 | g.chr6:42224499C>T   | Silent            | TRERF1  | p.L849L  | transcriptional regulator  | 40 (0.00)  | 36 (0.19)  | 0.52 |
| 11-01 | Gp3 | g.chr6:42237286C>A   | Missense Mutation | TRERF1  | p.G15C   | transcriptional regulator  | 39 (0.00)  | 26 (0.38)  | 1.03 |
| 11-01 | Gp3 | g.chr7:38301802G>T   | RNA               | TRGC1   |          | T cell receptor gamma c    | 96 (0.00)  | 43 (0.16)  | 0.43 |
| 11-01 | Gp3 | g.chr7:38389026C>T   | RNA               | TRGV5   |          | T cell receptor gamma v    | 30 (0.00)  | 40 (0.20)  | 0.53 |
| 11-01 | Gp3 | g.chr7:38389422G>A   | RNA               | TRGV5   |          | T cell receptor gamma v    | 20 (0.00)  | 14 (0.43)  | 1.14 |
| 11-01 | Gp3 | g.chr12:73056946C>A  | Missense Mutation | TRHDE   | p.Q1016K | thyrotropin-releasing ho   | 44 (0.00)  | 28 (0.18)  | 0.48 |
| 11-01 | Gp3 | g.chr4:154236996G>T  | Missense Mutation | TRIM2   | p.D516Y  | tripartite motif containir | 74 (0.00)  | 96 (0.28)  | 0.75 |
| 11-01 | Gp3 | g.chr7:138200033G>A  | Missense Mutation | TRIM24  | p.C187Y  | tripartite motif containir | 84 (0.00)  | 43 (0.26)  | 0.68 |
| 11-01 | Gp3 | g.chr5:180651279G>A  | Missense Mutation | TRIM41  | p.D94N   | tripartite motif containir | 23 (0.00)  | 35 (0.29)  | 0.76 |
| 11-01 | Gp3 | g.chr3:140401365C>A  | Missense Mutation | TRIM42  | p.P135T  | tripartite motif containir | 43 (0.02)  | 26 (0.19)  | 0.51 |
| 11-01 | Gp3 | g.chr2:96260124C>T   | Missense Mutation | TRIM43  | p.S118F  | tripartite motif containir | 97 (0.00)  | 54 (0.15)  | 0.40 |
| 11-01 | Gp3 | g.chr1:155149431G>A  | Silent            | TRIM46  | p.K231K  | tripartite motif containir | 36 (0.00)  | 55 (0.44)  | 1.16 |
| 11-01 | Gp3 | g.chr11:49080591G>A  | Missense Mutation | TRIM64C | p.P25L   | tripartite motif containir | 52 (0.00)  | 47 (0.28)  | 0.74 |
| 11-01 | Gp3 | g.chr11:49080595C>A  | Missense Mutation | TRIM64C | p.D24Y   | tripartite motif containir | 51 (0.00)  | 45 (0.20)  | 0.53 |
| 11-01 | Gp3 | g.chr1:231333194C>G  | Missense Mutation | TRIM67  | p.N374K  | tripartite motif containir | 84 (0.00)  | 42 (0.26)  | 0.54 |
| 11-01 | Gp3 | g.chr14:51561129C>T  | Missense Mutation | TRIM9   | p.E177K  | tripartite motif containir | 17 (0.00)  | 26 (0.19)  | 0.51 |
| 11-01 | Gp3 | g.chr22:38121535C>T  | Missense Mutation | TRIOBP  | p.T991I  | TRIO and F-actin bindir    | 16 (0.00)  | 40 (0.15)  | 0.40 |
| 11-01 | Gp3 | g.chr19:6750547G>C   | Missense Mutation | TRIP10  | p.E464D  | thyroid hormone receptc    | 57 (0.00)  | 35 (0.14)  | 0.38 |
| 11-01 | Gp3 | g.chr1:40307450C>T   | Missense Mutation | TRIT1   | p.G457E  | tRNA isopentenyltransf     | 93 (0.01)  | 48 (0.27)  | 0.72 |
| 11-01 | Gp3 | g.chr1:40318449C>A   | Nonsense Mutation | TRIT1   | p.E172*  | tRNA isopentenyltransfi    | 109 (0.00) | 109 (0.21) | 0.56 |
| 11-01 | Gp3 | g.chr1:40318542C>A   | Nonsense Mutation | TRIT1   | p.E141*  | tRNA isopentenyltransfi    | 39 (0.00)  | 24 (0.29)  | 0.78 |
| 11-01 | Gp3 | g.chr4:8453732G>A    | Missense Mutation | TRMT44  | p.V334M  | tRNA methyltransferase     | 121 (0.00) | 46 (0.28)  | 0.75 |
| 11-01 | Gp3 | g.chr4:8453736C>A    | Missense Mutation | TRMT44  | p.A335D  | tRNA methyltransferase     | 117 (0.00) | 43 (0.23)  | 0.62 |
| 11-01 | Gp3 | g.chr4:8477716G>C    | Missense Mutation | TRMT44  | p.K754N  | tRNA methyltransferase     | 42 (0.00)  | 43 (0.21)  | 0.56 |
| 11-01 | Gp3 | g.chr22:46751425G>T  | Missense Mutation | TRMU    | p.A320S  | tRNA 5-methylaminom        | 22 (0.00)  | 33 (0.18)  | 0.48 |
| 11-01 | Gp3 | g.chr22:46751479G>A  | Missense Mutation | TRMU    | p.A338T  | tRNA 5-methylaminom        | 22 (0.00)  | 31 (0.19)  | 0.52 |
| 11-01 | Gp3 | g.chrX:111155672C>A  | Missense Mutation | TRPC5   | p.K249N  | transient receptor potent  | 35 (0.00)  | 13 (0.38)  | 0.64 |
| 11-01 | Gp3 | g.chr15:31355454C>G  | Missense Mutation | TRPM1   | p.G278R  | transient receptor potent  | 25 (0.00)  | 21 (0.33)  | 0.89 |
| 11-01 | Gp3 | g.chr2:234878452G>T  | Splice Site       | TRPM8   |          | transient receptor potent  | 158 (0.00) | 95 (0.16)  | 0.42 |
| 11-01 | Gp3 | g.chr17:16325932G>A  | Silent            | TRPV2   | p.T118T  | transient receptor potent  | 26 (0.00)  | 24 (0.21)  | 0.56 |
| 11-01 | Gp3 | g.chr7:98555646C>T   | Missense Mutation | TRRAP   | p.L2066F | transformation/transcrip   | 16 (0.00)  | 10 (0.50)  | 1.33 |
| 11-01 | Gp3 | g.chr10:116735008G>C | Missense Mutation | TRUB1   | p.C307S  | TruB pseudouridine (psi    | 81 (0.01)  | 29 (0.17)  | 0.46 |
| 11-01 | Gp3 | g.chr10:116735009C>T | Silent            | TRUB1   | p.C307C  | TruB pseudouridine (psi    | 81 (0.01)  | 27 (0.19)  | 0.49 |
| 11-01 | Gp3 | g.chr13:45147717C>T  | Missense Mutation | TSC22D1 | p.V832I  | TSC22 domain family, 1     | 68 (0.00)  | 32 (0.38)  | 1.00 |
| 11-01 | Gp3 | g.chr13:45148119G>C  | Missense Mutation | TSC22D1 | p.P698A  | TSC22 domain family, 1     | 34 (0.00)  | 55 (0.33)  | 0.87 |

|       |     |                      |                   |         |           |                                      |            |            |      |
|-------|-----|----------------------|-------------------|---------|-----------|--------------------------------------|------------|------------|------|
| 11-01 | Gp3 | g.chr3:12531464G>C   | Missense Mutation | TSEN2   | p.E55D    | TSEN2 tRNA splicing e56 (0.00)       | 44 (0.16)  | 0.42       |      |
| 11-01 | Gp3 | g.chr18:72999894G>T  | Silent            | TSHZ1   | p.V844V   | teashirt zinc finger hom(31 (0.00)   | 48 (0.17)  | 0.44       |      |
| 11-01 | Gp3 | g.chr20:51871901G>A  | Missense Mutation | TSHZ2   | p.R635H   | teashirt zinc finger hom(85 (0.00)   | 64 (0.20)  | 0.54       |      |
| 11-01 | Gp3 | g.chr19:31767912G>T  | Silent            | TSHZ3   | p.P929P   | teashirt zinc finger hom(17 (0.00)   | 30 (0.20)  | 0.53       |      |
| 11-01 | Gp3 | g.chr8:143427199G>A  | Missense Mutation | TSNARE1 | p.P48L    | t-SNARE domain conta(51 (0.00)       | 67 (0.15)  | 0.40       |      |
| 11-01 | Gp3 | g.chr1:231700468C>A  | Missense Mutation | TSNAX   | p.F230L   | translin-associated facto(65 (0.00)  | 49 (0.18)  | 0.38       |      |
| 11-01 | Gp3 | g.chr19:11408928G>T  | Silent            | TSPAN16 | p.L60L    | tetraspanin 16                       | 69 (0.00)  | 41 (0.17)  | 0.46 |
| 11-01 | Gp3 | g.chr11:113230165G>T | Missense Mutation | TTC12   | p.Q509H   | tetratricopeptide repeat (36 (0.00)  | 28 (0.18)  | 0.48       |      |
| 11-01 | Gp3 | g.chr11:43469568C>T  | Silent            | TTC17   | p.Y894Y   | tetratricopeptide repeat (36 (0.00)  | 25 (0.24)  | 0.64       |      |
| 11-01 | Gp3 | g.chr10:75037019C>T  | Silent            | TTC18   | p.L372L   |                                      | 60 (0.00)  | 19 (0.26)  | 0.70 |
| 11-01 | Gp3 | g.chr10:75108268C>A  | Nonsense Mutation | TTC18   | p.E88*    |                                      | 39 (0.00)  | 22 (0.27)  | 0.73 |
| 11-01 | Gp3 | g.chr3:39170288G>A   | Silent            | TTC21A  | p.T594T   | tetratricopeptide repeat (74 (0.00)  | 29 (0.72)  | 1.93       |      |
| 11-01 | Gp3 | g.chr2:32891782C>T   | Missense Mutation | TTC27   | p.L296F   | tetratricopeptide repeat (53 (0.00)  | 51 (0.18)  | 0.47       |      |
| 11-01 | Gp3 | g.chr20:36641323G>T  | Missense Mutation | TTI1    | p.S299Y   | TELO2 interacting prote(59 (0.00)    | 42 (0.19)  | 0.51       |      |
| 11-01 | Gp3 | g.chr9:124751733C>T  | Missense Mutation | TTLL11  | p.R427H   | tubulin tyrosine ligase-li(58 (0.00) | 44 (0.16)  | 0.42       |      |
| 11-01 | Gp3 | g.chr3:9868851C>T    | Missense Mutation | TTLL3   | p.L137F   | tubulin tyrosine ligase-li(81 (0.00) | 40 (0.17)  | 0.47       |      |
| 11-01 | Gp3 | g.chr20:30513882C>A  | Missense Mutation | TTLL9   | p.H246N   | tubulin tyrosine ligase-li(24 (0.00) | 17 (0.29)  | 0.78       |      |
| 11-01 | Gp3 | g.chr2:179393000C>T  | Splice Site       | TTN     |           | titin                                | 129 (0.00) | 73 (0.23)  | 0.62 |
| 11-01 | Gp3 | g.chr2:179397441G>T  | Missense Mutation | TTN     | p.P34634Q | titin                                | 120 (0.00) | 80 (0.19)  | 0.50 |
| 11-01 | Gp3 | g.chr2:179408789C>A  | Missense Mutation | TTN     | p.A32028S | titin                                | 158 (0.00) | 57 (0.16)  | 0.42 |
| 11-01 | Gp3 | g.chr2:179410280G>C  | Missense Mutation | TTN     | p.R31853G | titin                                | 191 (0.00) | 115 (0.18) | 0.49 |
| 11-01 | Gp3 | g.chr2:179410337C>T  | Missense Mutation | TTN     | p.D31834N | titin                                | 180 (0.00) | 99 (0.27)  | 0.73 |
| 11-01 | Gp3 | g.chr2:179421724C>T  | Missense Mutation | TTN     | p.S29386N | titin                                | 72 (0.00)  | 59 (0.49)  | 1.31 |
| 11-01 | Gp3 | g.chr2:179421774G>A  | Silent            | TTN     | p.G29369G | titin                                | 86 (0.00)  | 56 (0.21)  | 0.57 |
| 11-01 | Gp3 | g.chr2:179429286C>T  | Nonsense Mutation | TTN     | p.W27191* | titin                                | 27 (0.00)  | 17 (0.47)  | 1.25 |
| 11-01 | Gp3 | g.chr2:179431042G>A  | Missense Mutation | TTN     | p.A26606V | titin                                | 98 (0.00)  | 40 (0.23)  | 0.60 |
| 11-01 | Gp3 | g.chr2:179434101G>T  | Missense Mutation | TTN     | p.S25586R | titin                                | 74 (0.00)  | 14 (0.36)  | 0.95 |
| 11-01 | Gp3 | g.chr2:179437223C>T  | Missense Mutation | TTN     | p.D24546N | titin                                | 56 (0.00)  | 44 (0.18)  | 0.48 |
| 11-01 | Gp3 | g.chr2:179454097G>A  | Silent            | TTN     | p.D20785D | titin                                | 139 (0.00) | 59 (0.24)  | 0.63 |
| 11-01 | Gp3 | g.chr2:179454585C>A  | Missense Mutation | TTN     | p.V20623F | titin                                | 85 (0.00)  | 68 (0.25)  | 0.67 |
| 11-01 | Gp3 | g.chr2:179455290C>T  | Missense Mutation | TTN     | p.A20388T | titin                                | 99 (0.00)  | 78 (0.18)  | 0.48 |
| 11-01 | Gp3 | g.chr2:179463965C>A  | Missense Mutation | TTN     | p.G18852V | titin                                | 93 (0.01)  | 30 (0.47)  | 1.24 |
| 11-01 | Gp3 | g.chr2:179477636C>A  | Silent            | TTN     | p.G16604G | titin                                | 27 (0.00)  | 20 (0.65)  | 1.73 |
| 11-01 | Gp3 | g.chr2:179483129C>A  | Nonsense Mutation | TTN     | p.G15686* | titin                                | 107 (0.00) | 43 (0.23)  | 0.62 |
| 11-01 | Gp3 | g.chr2:179514964C>T  | Silent            | TTN     | p.E13248E | titin                                | 64 (0.00)  | 41 (0.37)  | 0.98 |

|       |     |                      |                   |          |           |                               |            |            |      |
|-------|-----|----------------------|-------------------|----------|-----------|-------------------------------|------------|------------|------|
| 11-01 | Gp3 | g.chr2:179528587G>A  | Missense Mutation | TTN      | p.P12136L | titin                         | 126 (0.00) | 64 (0.16)  | 0.42 |
| 11-01 | Gp3 | g.chr2:179536995C>T  | Splice Site       | TTN      |           | titin                         | 55 (0.00)  | 17 (0.65)  | 1.73 |
| 11-01 | Gp3 | g.chr2:179567187C>T  | Missense Mutation | TTN      | p.D10143N | titin                         | 173 (0.00) | 122 (0.20) | 0.52 |
| 11-01 | Gp3 | g.chr2:179577094G>T  | Nonsense Mutation | TTN      | p.Y9185*  | titin                         | 118 (0.00) | 44 (0.36)  | 0.97 |
| 11-01 | Gp3 | g.chr2:179577120C>T  | Missense Mutation | TTN      | p.E9177K  | titin                         | 95 (0.00)  | 50 (0.44)  | 1.17 |
| 11-01 | Gp3 | g.chr2:179582320T>A  | Silent            | TTN      | p.I8427I  | titin                         | 108 (0.00) | 39 (0.18)  | 0.48 |
| 11-01 | Gp3 | g.chr2:179584283G>T  | Missense Mutation | TTN      | p.S7979Y  | titin                         | 90 (0.00)  | 71 (0.20)  | 0.53 |
| 11-01 | Gp3 | g.chr2:179592321G>T  | Missense Mutation | TTN      | p.L6662I  | titin                         | 61 (0.00)  | 27 (0.44)  | 1.19 |
| 11-01 | Gp3 | g.chr2:179621192C>G  | Missense Mutation | TTN      | p.V3671L  | titin                         | 57 (0.00)  | 27 (0.22)  | 0.59 |
| 11-01 | Gp3 | g.chr8:63978576C>G   | Missense Mutation | TTPA     | p.V147L   | tocopherol (alpha) trans:     | 42 (0.00)  | 38 (0.13)  | 0.44 |
| 11-01 | Gp3 | g.chr17:72249305C>A  | Missense Mutation | TTYH2    | p.Q449K   | tweety family member 278      | 105 (0.00) | 105 (0.14) | 0.38 |
| 11-01 | Gp3 | g.chr12:49578885G>A  | Missense Mutation | TUBA1A   | p.R422C   | tubulin, alpha 1a             | 95 (0.00)  | 67 (0.28)  | 0.76 |
| 11-01 | Gp3 | g.chr12:49521888G>C  | Silent            | TUBA1B   | p.A403A   | tubulin, alpha 1b             | 141 (0.00) | 73 (0.16)  | 0.44 |
| 11-01 | Gp3 | g.chr2:132238223C>A  | Nonsense Mutation | TUBA3D   | p.Y319*   | tubulin, alpha 3d             | 40 (0.00)  | 58 (0.26)  | 0.69 |
| 11-01 | Gp3 | g.chr16:90161061G>A  | RNA               | TUBB8P7  |           | tubulin, beta 8 class VII 25  | 30 (0.00)  | 30 (0.20)  | 0.53 |
| 11-01 | Gp3 | g.chr16:90162422C>A  | RNA               | TUBB8P7  |           | tubulin, beta 8 class VII 155 | 98 (0.01)  | 98 (0.18)  | 0.49 |
| 11-01 | Gp3 | g.chr15:22861870C>A  | Silent            | TUBGCP5  | p.S630S   | tubulin, gamma comple:        | 66 (0.00)  | 18 (0.33)  | 0.89 |
| 11-01 | Gp3 | g.chr16:28854441T>C  | Missense Mutation | TUFM     | p.K408R   | Tu translation elongatio:     | 59 (0.00)  | 40 (0.15)  | 0.40 |
| 11-01 | Gp3 | g.chr12:3043654G>A   | Missense Mutation | TULP3    | p.G284D   | tubby like protein 3          | 66 (0.00)  | 56 (0.32)  | 0.86 |
| 11-01 | Gp3 | g.chr16:10868841G>A  | Missense Mutation | TVP23A   | p.L68F    | trans-golgi network vesi      | 152 (0.00) | 130 (0.18) | 0.47 |
| 11-01 | Gp3 | g.chr17:18694276G>T  | Missense Mutation | TVP23B   | p.G55W    | trans-golgi network vesi      | 60 (0.02)  | 45 (0.27)  | 0.71 |
| 11-01 | Gp3 | g.chrX:16838352G>T   | Missense Mutation | TXLNG    | p.A158S   | taxilin gamma                 | 61 (0.00)  | 25 (0.44)  | 0.73 |
| 11-01 | Gp3 | g.chr16:11829962C>T  | Missense Mutation | TXNDC11  | p.V128I   | thioredoxin domain con:       | 46 (0.00)  | 77 (0.16)  | 0.42 |
| 11-01 | Gp3 | g.chr18:669126C>T    | Missense Mutation | TYMS     | p.T87I    | thymidylate synthetase        | 45 (0.00)  | 39 (0.18)  | 0.48 |
| 11-01 | Gp3 | g.chr18:669168C>T    | Missense Mutation | TYMS     | p.P101L   | thymidylate synthetase        | 35 (0.00)  | 21 (0.29)  | 0.76 |
| 11-01 | Gp3 | g.chr7:72081728C>G   | RNA               | TYW1B    |           | tRNA-yW synthesizing          | 172 (0.00) | 142 (0.15) | 0.39 |
| 11-01 | Gp3 | g.chr9:139974584C>A  | Silent            | UAP1L1   | p.R390R   | UDP-N-acetylglucosam          | 56 (0.00)  | 50 (0.16)  | 0.43 |
| 11-01 | Gp3 | g.chr3:69112141G>A   | Missense Mutation | UBA3     | p.P229S   | ubiquitin-like modifier ε     | 31 (0.00)  | 38 (0.55)  | 1.47 |
| 11-01 | Gp3 | g.chr4:68905068G>A   | RNA               | UBA6-AS1 |           | UBA6 antisense RNA 1          | 52 (0.00)  | 13 (0.46)  | 1.23 |
| 11-01 | Gp3 | g.chr11:118244337C>T | Silent            | UBE4A    | p.Y358Y   | ubiquitination factor E4.     | 39 (0.03)  | 27 (0.30)  | 0.79 |
| 11-01 | Gp3 | g.chr11:118247293G>T | Missense Mutation | UBE4A    | p.L492F   | ubiquitination factor E4.     | 95 (0.00)  | 19 (0.26)  | 0.70 |
| 11-01 | Gp3 | g.chr1:10221341C>G   | Silent            | UBE4B    | p.P936P   | ubiquitination factor E4.     | 27 (0.00)  | 30 (0.30)  | 0.80 |
| 11-01 | Gp3 | g.chr6:42561936C>A   | Missense Mutation | UBR2     | p.T142K   | ubiquitin protein ligase      | 127 (0.00) | 20 (0.45)  | 1.20 |
| 11-01 | Gp3 | g.chr2:170806483C>A  | Silent            | UBR3     | p.R1151R  | ubiquitin protein ligase      | 114 (0.00) | 53 (0.53)  | 1.41 |
| 11-01 | Gp3 | g.chr1:19499499G>A   | Missense Mutation | UBR4     | p.A1127V  | ubiquitin protein ligase      | 136 (0.00) | 12 (0.42)  | 1.11 |

|       |     |                      |                   |              |          |                                     |            |      |
|-------|-----|----------------------|-------------------|--------------|----------|-------------------------------------|------------|------|
| 11-01 | Gp3 | g.chr1:19510363G>A   | Missense Mutation | UBR4         | p.A709V  | ubiquitin protein ligase 139 (0.00) | 29 (0.17)  | 0.46 |
| 11-01 | Gp3 | g.chr17:42285132T>C  | Missense Mutation | UBTF         | p.K654E  | upstream binding transc 56 (0.00)   | 46 (0.22)  | 0.58 |
| 11-01 | Gp3 | g.chr17:42285133A>T  | Silent            | UBTF         | p.R653R  | upstream binding transc 56 (0.00)   | 46 (0.22)  | 0.58 |
| 11-01 | Gp3 | g.chr17:42285134C>T  | Missense Mutation | UBTF         | p.R653H  | upstream binding transc 57 (0.02)   | 46 (0.22)  | 0.58 |
| 11-01 | Gp3 | g.chr1:20517444G>A   | Silent            | UBXN10       | p.V130V  | UBX domain protein 1065 (0.02)      | 49 (0.14)  | 0.38 |
| 11-01 | Gp3 | g.chr1:20517756C>G   | Silent            | UBXN10       | p.T234T  | UBX domain protein 1042 (0.00)      | 10 (0.60)  | 1.60 |
| 11-01 | Gp3 | g.chr2:24222599G>T   | Silent            | UBXN2A       | p.P214P  | UBX domain protein 2A31 (0.00)      | 15 (0.40)  | 1.07 |
| 11-01 | Gp3 | g.chr4:141484599G>A  | Silent            | UCP1         | p.P133P  | uncoupling protein 1 (m49 (0.00)    | 28 (0.75)  | 2.00 |
| 11-01 | Gp3 | g.chr4:69433776C>T   | Missense Mutation | UGT2B17      | p.E143K  | UDP glucuronosyltransf62 (0.00)     | 47 (0.26)  | 0.68 |
| 11-01 | Gp3 | g.chr4:69434054C>T   | Missense Mutation | UGT2B17      | p.G50D   | UDP glucuronosyltransf67 (0.00)     | 40 (0.55)  | 1.47 |
| 11-01 | Gp3 | g.chr4:70146359T>A   | Silent            | UGT2B28      | p.V47V   | UDP glucuronosyltransf87 (0.01)     | 52 (0.25)  | 0.67 |
| 11-01 | Gp3 | g.chr6:34802564G>A   | Missense Mutation | UHRF1BP1     | p.D199N  | UHRF1 binding protein 48 (0.00)     | 19 (0.32)  | 0.84 |
| 11-01 | Gp3 | g.chr6:34826888G>A   | Missense Mutation | UHRF1BP1     | p.D919N  | UHRF1 binding protein 21 (0.00)     | 14 (0.50)  | 1.33 |
| 11-01 | Gp3 | g.chr6:34826898C>A   | Nonsense Mutation | UHRF1BP1     | p.S922*  | UHRF1 binding protein 21 (0.00)     | 14 (0.50)  | 1.33 |
| 11-01 | Gp3 | g.chr12:100452105C>A | Missense Mutation | UHRF1BP1L    | p.V984F  | UHRF1 binding protein 48 (0.00)     | 29 (0.21)  | 0.70 |
| 11-01 | Gp3 | g.chr9:35259002G>A   | Missense Mutation | UNC13B       | p.E161K  | unc-13 homolog B (C. e37 (0.00)     | 27 (0.37)  | 0.99 |
| 11-01 | Gp3 | g.chr9:35380510G>C   | Missense Mutation | UNC13B       | p.D668H  | unc-13 homolog B (C. e26 (0.00)     | 32 (0.25)  | 0.67 |
| 11-01 | Gp3 | g.chr15:54919105C>A  | Silent            | UNC13C       | p.R2147R | unc-13 homolog C (C. e104 (0.00)    | 53 (0.17)  | 0.45 |
| 11-01 | Gp3 | g.chr14:94044201C>T  | Missense Mutation | UNC79        | p.S565F  | unc-79 homolog (C. ele783 (0.00)    | 41 (0.34)  | 0.91 |
| 11-01 | Gp3 | g.chr2:210685141C>T  | Missense Mutation | UNC80        | p.P690L  | unc-80 homolog (C. ele752 (0.00)    | 40 (0.15)  | 0.40 |
| 11-01 | Gp3 | g.chr19:18960999C>T  | Missense Mutation | UPF1         | p.L193F  | UPF1 regulator of nonsc48 (0.00)    | 32 (0.28)  | 0.75 |
| 11-01 | Gp3 | g.chr10:11994221C>A  | Nonsense Mutation | UPF2         | p.E960*  | UPF2 regulator of nonsc38 (0.00)    | 26 (0.23)  | 0.62 |
| 11-01 | Gp3 | g.chr10:12070919G>A  | Missense Mutation | UPF2         | p.P324S  | UPF2 regulator of nonsc71 (0.00)    | 48 (0.21)  | 0.56 |
| 11-01 | Gp3 | g.chr10:12070989C>A  | Missense Mutation | UPF2         | p.E300D  | UPF2 regulator of nonsc47 (0.00)    | 48 (0.15)  | 0.39 |
| 11-01 | Gp3 | g.chr1:229771150G>A  | Missense Mutation | URB2         | p.G264R  | URB2 ribosome biogenc48 (0.00)      | 33 (0.33)  | 0.69 |
| 11-01 | Gp3 | g.chr7:43908593G>C   | Missense Mutation | URGCP-MRPS24 | p.P109A  | URGCP-MRPS24 readt19 (0.00)         | 16 (0.31)  | 0.83 |
| 11-01 | Gp3 | g.chr1:161011620G>A  | Missense Mutation | USF1         | p.A98V   | upstream transcription fi55 (0.00)  | 47 (0.21)  | 0.57 |
| 11-01 | Gp3 | g.chr17:72915736G>C  | Missense Mutation | USH1G        | p.L399V  | Usher syndrome 1G (au16 (0.00)      | 37 (0.16)  | 0.43 |
| 11-01 | Gp3 | g.chr1:215844562C>G  | Missense Mutation | USH2A        | p.E4629Q | Usher syndrome 2A (au65 (0.00)      | 27 (0.26)  | 0.69 |
| 11-01 | Gp3 | g.chr1:215956210T>A  | Silent            | USH2A        | p.G3485G | Usher syndrome 2A (au18 (0.00)      | 12 (0.50)  | 1.33 |
| 11-01 | Gp3 | g.chr4:76708269C>A   | Missense Mutation | USO1         | p.Q306K  | USO1 vesicle transport :120 (0.00)  | 106 (0.20) | 0.53 |
| 11-01 | Gp3 | g.chr4:76721611G>A   | Silent            | USO1         | p.E566E  | USO1 vesicle transport :86 (0.00)   | 53 (0.23)  | 0.60 |
| 11-01 | Gp3 | g.chr8:11996222G>A   | Silent            | USP17L2      | p.H16H   | ubiquitin specific peptid204 (0.00) | 37 (0.27)  | 0.40 |
| 11-01 | Gp3 | g.chr3:49147919C>A   | Missense Mutation | USP19        | p.A1271S | ubiquitin specific peptid41 (0.00)  | 23 (0.22)  | 0.58 |
| 11-01 | Gp3 | g.chr9:132620800G>T  | Missense Mutation | USP20        | p.A85S   | ubiquitin specific peptid21 (0.00)  | 18 (0.28)  | 0.74 |

|       |     |                      |                   |        |          |                                     |            |      |
|-------|-----|----------------------|-------------------|--------|----------|-------------------------------------|------------|------|
| 11-01 | Gp3 | g.chr1:55619577G>A   | Missense Mutation | USP24  | p.S609L  | ubiquitin specific peptid22 (0.00)  | 14 (0.36)  | 0.95 |
| 11-01 | Gp3 | g.chr1:78187821G>C   | Missense Mutation | USP33  | p.L484V  | ubiquitin specific peptid34 (0.00)  | 25 (0.20)  | 0.53 |
| 11-01 | Gp3 | g.chr1:78191382C>T   | Missense Mutation | USP33  | p.V401I  | ubiquitin specific peptid32 (0.00)  | 17 (0.29)  | 0.78 |
| 11-01 | Gp3 | g.chr2:61441439G>A   | Missense Mutation | USP34  | p.P2813L | ubiquitin specific peptid66 (0.02)  | 34 (0.29)  | 0.78 |
| 11-01 | Gp3 | g.chr2:61492630C>A   | Missense Mutation | USP34  | p.V1894F | ubiquitin specific peptid48 (0.00)  | 45 (0.29)  | 0.77 |
| 11-01 | Gp3 | g.chr2:234436104C>G  | Missense Mutation | USP40  | p.L557F  | ubiquitin specific peptid67 (0.00)  | 42 (0.38)  | 1.02 |
| 11-01 | Gp3 | g.chr2:234449338C>T  | Silent            | USP40  | p.K379K  | ubiquitin specific peptid26 (0.00)  | 24 (0.33)  | 0.89 |
| 11-01 | Gp3 | g.chr4:53494172C>A   | Missense Mutation | USP46  | p.K92N   | ubiquitin specific peptid66 (0.00)  | 43 (0.35)  | 0.93 |
| 11-01 | Gp3 | g.chr12:6968641G>C   | Missense Mutation | USP5   | p.D356H  | ubiquitin specific peptid29 (0.00)  | 17 (0.29)  | 0.78 |
| 11-01 | Gp3 | g.chr4:120214304C>G  | Missense Mutation | USP53  | p.H1054D | ubiquitin specific peptid31 (0.00)  | 23 (0.30)  | 0.81 |
| 11-01 | Gp3 | g.chr17:5066244C>T   | Missense Mutation | USP6   | p.A994V  | ubiquitin specific peptid83 (0.00)  | 44 (0.39)  | 1.03 |
| 11-01 | Gp3 | g.chr17:5074021G>C   | Missense Mutation | USP6   | p.E1255D | ubiquitin specific peptid70 (0.00)  | 20 (0.45)  | 1.20 |
| 11-01 | Gp3 | g.chr17:5074050C>A   | Missense Mutation | USP6   | p.A1265D | ubiquitin specific peptid169 (0.00) | 67 (0.24)  | 0.64 |
| 11-01 | Gp3 | g.chr10:11504608C>T  | Silent            | USP6NL | p.Q773Q  | USP6 N-terminal like 141 (0.00)     | 38 (0.26)  | 0.70 |
| 11-01 | Gp3 | g.chr10:11505444C>A  | Missense Mutation | USP6NL | p.A495S  | USP6 N-terminal like 114 (0.00)     | 49 (0.20)  | 0.54 |
| 11-01 | Gp3 | g.chr15:50773847C>G  | Missense Mutation | USP8   | p.A386G  | ubiquitin specific peptid29 (0.00)  | 20 (0.25)  | 0.67 |
| 11-01 | Gp3 | g.chr15:50774164G>A  | Missense Mutation | USP8   | p.E492K  | ubiquitin specific peptid70 (0.00)  | 55 (0.20)  | 0.53 |
| 11-01 | Gp3 | g.chrX:41012200G>A   | Splice Site       | USP9X  |          | ubiquitin specific peptid59 (0.00)  | 27 (0.26)  | 0.43 |
| 11-01 | Gp3 | g.chrX:129055247G>A  | Silent            | UTP14A | p.E344E  | UTP14, U3 small nucle(50 (0.00)     | 28 (0.29)  | 0.48 |
| 11-01 | Gp3 | g.chr12:101755780G>T | Missense Mutation | UTP20  | p.G1911V | UTP20, small subunit (574 (0.00)    | 61 (0.16)  | 0.44 |
| 11-01 | Gp3 | g.chr6:144835834C>A  | Missense Mutation | UTRN   | p.R1708S | utrophin 85 (0.00)                  | 89 (0.15)  | 0.39 |
| 11-01 | Gp3 | g.chr19:46029246G>A  | Missense Mutation | VASP   | p.E364K  | vasodilator-stimulated p87 (0.00)   | 84 (0.17)  | 0.44 |
| 11-01 | Gp3 | g.chrX:154456683G>A  | Missense Mutation | VBP1   | p.M101I  | von Hippel-Lindau bind99 (0.00)     | 64 (0.38)  | 0.62 |
| 11-01 | Gp3 | g.chrX:154464649G>T  | Splice Site       | VBP1   |          | von Hippel-Lindau bind49 (0.00)     | 32 (0.28)  | 0.47 |
| 11-01 | Gp3 | g.chr5:82850843G>A   | Missense Mutation | VCAN   | p.D500N  | versican 94 (0.00)                  | 98 (0.16)  | 0.44 |
| 11-01 | Gp3 | g.chr9:35057508G>A   | Missense Mutation | VCP    | p.P727L  | valosin containing prote73 (0.00)   | 35 (0.14)  | 0.38 |
| 11-01 | Gp3 | g.chr8:67547289G>A   | Missense Mutation | VCPIP1 | p.P1039L | valosin containing prote121 (0.00)  | 53 (0.13)  | 0.44 |
| 11-01 | Gp3 | g.chr8:67577395C>T   | Missense Mutation | VCPIP1 | p.G600E  | valosin containing prote50 (0.00)   | 37 (0.30)  | 0.99 |
| 11-01 | Gp3 | g.chr17:56052207G>T  | Missense Mutation | VEZF1  | p.T398N  | vascular endothelial zin(29 (0.00)  | 34 (0.21)  | 0.55 |
| 11-01 | Gp3 | g.chr3:10188290C>T   | Nonsense Mutation | VHL    | p.Q145*  | von Hippel-Lindau tum(69 (0.01)     | 108 (0.15) | 0.40 |
| 11-01 | Gp3 | g.chr10:17276742G>A  | Silent            | VIM    | p.Q311Q  | vimentin 45 (0.00)                  | 45 (0.36)  | 0.95 |
| 11-01 | Gp3 | g.chr6:153077282G>A  | Missense Mutation | VIP    | p.E117K  | vasoactive intestinal pe(26 (0.00)  | 14 (0.50)  | 1.33 |
| 11-01 | Gp3 | g.chr3:51456135G>A   | Silent            | VPRBP  | p.S695S  | Vpr (HIV-1) binding pr(90 (0.00)    | 61 (0.18)  | 0.48 |
| 11-01 | Gp3 | g.chr9:79931155G>A   | Missense Mutation | VPS13A | p.V1566I | vacuolar protein sorting60 (0.00)   | 56 (0.12)  | 0.41 |
| 11-01 | Gp3 | g.chr8:100568860T>A  | Missense Mutation | VPS13B | p.L1668H | vacuolar protein sorting75 (0.00)   | 29 (0.21)  | 0.55 |

|       |     |                      |                   |         |          |                                        |            |      |
|-------|-----|----------------------|-------------------|---------|----------|----------------------------------------|------------|------|
| 11-01 | Gp3 | g.chr8:100791009G>A  | Missense Mutation | VPS13B  | p.R2535Q | vacuolar protein sorting 119 (0.00)    | 46 (0.37)  | 0.99 |
| 11-01 | Gp3 | g.chr8:100830964C>G  | Missense Mutation | VPS13B  | p.I2848M | vacuolar protein sorting 36 (0.00)     | 31 (0.19)  | 0.52 |
| 11-01 | Gp3 | g.chr8:100831088C>A  | Missense Mutation | VPS13B  | p.L2890I | vacuolar protein sorting 34 (0.00)     | 19 (0.37)  | 0.98 |
| 11-01 | Gp3 | g.chr15:62201307C>G  | Silent            | VPS13C  | p.V2954V | vacuolar protein sorting 44 (0.00)     | 16 (0.31)  | 0.83 |
| 11-01 | Gp3 | g.chr15:62211649C>T  | Splice Site       | VPS13C  |          | vacuolar protein sorting 34 (0.00)     | 23 (0.22)  | 0.58 |
| 11-01 | Gp3 | g.chr1:12331100A>T   | Silent            | VPS13D  | p.R674R  | vacuolar protein sorting 23 (0.00)     | 18 (0.33)  | 0.89 |
| 11-01 | Gp3 | g.chr1:12371651G>A   | Missense Mutation | VPS13D  | p.R2264Q | vacuolar protein sorting 123 (0.00)    | 66 (0.15)  | 0.40 |
| 11-01 | Gp3 | g.chr1:12405459C>T   | Silent            | VPS13D  | p.L2972L | vacuolar protein sorting 84 (0.00)     | 51 (0.24)  | 0.63 |
| 11-01 | Gp3 | g.chr20:2845225G>T   | Missense Mutation | VPS16   | p.K617N  | vacuolar protein sorting 180 (0.00)    | 100 (0.28) | 0.75 |
| 11-01 | Gp3 | g.chr8:17143872G>T   | Missense Mutation | VPS37A  | p.R377I  | vacuolar protein sorting 36 (0.00)     | 22 (0.32)  | 0.47 |
| 11-01 | Gp3 | g.chr16:69356582C>T  | Silent            | VPS4A   | p.L397L  | vacuolar protein sorting 15 (0.00)     | 12 (0.67)  | 1.78 |
| 11-01 | Gp3 | g.chr14:97321569G>T  | Missense Mutation | VRK1    | p.L195F  | vaccinia related kinase 131 (0.00)     | 33 (0.18)  | 0.48 |
| 11-01 | Gp3 | g.chr19:50482398G>T  | Missense Mutation | VRK3    | p.L460M  | vaccinia related kinase 345 (0.00)     | 30 (0.23)  | 0.62 |
| 11-01 | Gp3 | g.chrX:107301365G>A  | Silent            | VSIG1   | p.V49V   | V-set and immunoglobulin 51 (0.00)     | 17 (0.35)  | 0.59 |
| 11-01 | Gp3 | g.chr12:118509249C>A | Silent            | VSIG10  | p.V415V  | V-set and immunoglobulin 64 (0.00)     | 28 (0.32)  | 0.86 |
| 11-01 | Gp3 | g.chr12:118520063C>A | Missense Mutation | VSIG10  | p.G178V  | V-set and immunoglobulin 61 (0.00)     | 43 (0.19)  | 0.50 |
| 11-01 | Gp3 | g.chr1:159828016G>T  | Silent            | VSIG8   | p.R98R   | V-set and immunoglobulin 31 (0.00)     | 32 (0.16)  | 0.42 |
| 11-01 | Gp3 | g.chr1:20680399G>T   | Silent            | VWA5B1  | p.P1102P | von Willebrand factor A16 (0.00)       | 26 (0.19)  | 0.51 |
| 11-01 | Gp3 | g.chr7:12409540G>T   | Missense Mutation | VWDE    | p.P798T  | von Willebrand factor D25 (0.00)       | 13 (0.46)  | 1.23 |
| 11-01 | Gp3 | g.chr7:12410064C>A   | Missense Mutation | VWDE    | p.C623F  | von Willebrand factor D44 (0.00)       | 49 (0.18)  | 0.49 |
| 11-01 | Gp3 | g.chr7:12410108G>A   | Silent            | VWDE    | p.D608D  | von Willebrand factor D67 (0.00)       | 71 (0.18)  | 0.49 |
| 11-01 | Gp3 | g.chr7:12423194G>T   | Missense Mutation | VWDE    | p.S170Y  | von Willebrand factor D35 (0.00)       | 21 (0.29)  | 0.76 |
| 11-01 | Gp3 | g.chr12:6128410G>A   | Missense Mutation | VWF     | p.R1392W | von Willebrand factor 22 (0.00)        | 39 (0.23)  | 0.62 |
| 11-01 | Gp3 | g.chr12:6131119G>A   | Silent            | VWF     | p.A1207A | von Willebrand factor 76 (0.00)        | 67 (0.24)  | 0.64 |
| 11-01 | Gp3 | g.chr12:6219591G>T   | Missense Mutation | VWF     | p.L161M  | von Willebrand factor 92 (0.00)        | 41 (0.24)  | 0.65 |
| 11-01 | Gp3 | g.chr10:88211741C>T  | Missense Mutation | WAPAL   | p.V1033I | wings apart-like homolog 31 (0.00)     | 14 (0.36)  | 0.49 |
| 11-01 | Gp3 | g.chr1:119683189G>A  | Missense Mutation | WARS2   | p.P27S   | tryptophanyl tRNA synthetase 41 (0.00) | 30 (0.17)  | 0.44 |
| 11-01 | Gp3 | g.chr2:74687364C>T   | Silent            | WBP1    | p.F156F  | WW domain binding protein 22 (0.00)    | 18 (0.50)  | 0.76 |
| 11-01 | Gp3 | g.chr18:30093567C>G  | RNA               | WBP11P1 |          | WW domain binding protein 138 (0.00)   | 116 (0.15) | 0.39 |
| 11-01 | Gp3 | g.chr4:85638132C>A   | Missense Mutation | WDFY3   | p.G2598C | WD repeat and FYVE domain 147 (0.00)   | 74 (0.23)  | 0.61 |
| 11-01 | Gp3 | g.chr4:85752650G>T   | Missense Mutation | WDFY3   | p.L229M  | WD repeat and FYVE domain 83 (0.00)    | 48 (0.17)  | 0.44 |
| 11-01 | Gp3 | g.chr17:9515659C>G   | Missense Mutation | WDR16   | p.I296M  | WD repeat domain 16 35 (0.00)          | 22 (0.23)  | 0.61 |
| 11-01 | Gp3 | g.chr4:177071001C>T  | Silent            | WDR17   | p.C647C  | WD repeat domain 17 79 (0.00)          | 22 (0.23)  | 0.61 |
| 11-01 | Gp3 | g.chr4:39233564G>A   | Silent            | WDR19   | p.L710L  | WD repeat domain 19 51 (0.00)          | 68 (0.29)  | 0.78 |
| 11-01 | Gp3 | g.chr14:102675474G>A | Missense Mutation | WDR20   | p.D323N  | WD repeat domain 20 82 (0.00)          | 31 (0.26)  | 0.69 |

|       |     |                      |                   |        |          |                           |            |           |      |
|-------|-----|----------------------|-------------------|--------|----------|---------------------------|------------|-----------|------|
| 11-01 | Gp3 | g.chr1:118475976G>A  | Missense Mutation | WDR3   | p.A12T   | WD repeat domain 3        | 63 (0.02)  | 50 (0.36) | 0.96 |
| 11-01 | Gp3 | g.chr17:80574448C>T  | Missense Mutation | WDR45B | p.G294S  | WD repeat domain 45B      | 16 (0.00)  | 26 (0.23) | 0.62 |
| 11-01 | Gp3 | g.chr9:137019614G>C  | Missense Mutation | WDR5   | p.V220L  | WD repeat domain 5        | 72 (0.00)  | 88 (0.23) | 0.61 |
| 11-01 | Gp3 | g.chr3:113049154G>A  | Missense Mutation | WDR52  | p.S1326L |                           | 58 (0.00)  | 54 (0.20) | 0.54 |
| 11-01 | Gp3 | g.chr3:113146109C>T  | Missense Mutation | WDR52  | p.E60K   |                           | 17 (0.00)  | 18 (0.39) | 1.04 |
| 11-01 | Gp3 | g.chr19:36550872G>A  | Missense Mutation | WDR62  | p.C91Y   | WD repeat domain 62       | 32 (0.00)  | 52 (0.42) | 1.13 |
| 11-01 | Gp3 | g.chr19:36584967C>G  | Missense Mutation | WDR62  | p.H790D  | WD repeat domain 62       | 81 (0.01)  | 34 (0.15) | 0.39 |
| 11-01 | Gp3 | g.chr1:85563273G>T   | Missense Mutation | WDR63  | p.A429S  | WD repeat domain 63       | 30 (0.00)  | 24 (0.33) | 0.89 |
| 11-01 | Gp3 | g.chr1:241815852G>A  | Silent            | WDR64  | p.L22L   | WD repeat domain 64       | 126 (0.00) | 53 (0.23) | 0.60 |
| 11-01 | Gp3 | g.chr1:43689735G>T   | Nonsense Mutation | WDR65  | p.E909*  |                           | 77 (0.00)  | 27 (0.22) | 0.59 |
| 11-01 | Gp3 | g.chr12:122399973G>A | Missense Mutation | WDR66  | p.M799I  | WD repeat domain 66       | 75 (0.00)  | 63 (0.14) | 0.38 |
| 11-01 | Gp3 | g.chr18:54444098C>A  | Missense Mutation | WDR7   | p.F978L  | WD repeat domain 7        | 74 (0.00)  | 61 (0.39) | 1.05 |
| 11-01 | Gp3 | g.chr18:54483360G>A  | Missense Mutation | WDR7   | p.D1097N | WD repeat domain 7        | 41 (0.00)  | 25 (0.20) | 0.53 |
| 11-01 | Gp3 | g.chr15:53957885C>T  | Missense Mutation | WDR72  | p.V626I  | WD repeat domain 72       | 21 (0.00)  | 38 (0.16) | 0.42 |
| 11-01 | Gp3 | g.chr1:67292626G>T   | Missense Mutation | WDR78  | p.P739Q  | WD repeat domain 78       | 53 (0.02)  | 94 (0.33) | 0.88 |
| 11-01 | Gp3 | g.chr19:38380134C>G  | Missense Mutation | WDR87  | p.A1354P | WD repeat domain 87       | 87 (0.00)  | 25 (0.64) | 1.71 |
| 11-01 | Gp3 | g.chr19:38385359G>A  | Silent            | WDR87  | p.Y289Y  | WD repeat domain 87       | 44 (0.02)  | 29 (0.31) | 0.83 |
| 11-01 | Gp3 | g.chr19:33647312C>G  | Missense Mutation | WDR88  | p.F287L  | WD repeat domain 88       | 42 (0.00)  | 20 (0.45) | 1.20 |
| 11-01 | Gp3 | g.chr15:90272952C>G  | Missense Mutation | WDR93  | p.H388D  | WD repeat domain 93       | 54 (0.00)  | 49 (0.16) | 0.44 |
| 11-01 | Gp3 | g.chr4:6303230C>T    | Missense Mutation | WFS1   | p.L570F  | Wolfram syndrome 1 (w     | 20 (0.00)  | 45 (0.20) | 0.53 |
| 11-01 | Gp3 | g.chr17:38420851C>T  | Silent            | WIPF2  | p.S141S  | WAS/WASL interacting      | 77 (0.00)  | 57 (0.16) | 0.42 |
| 11-01 | Gp3 | g.chr17:66426166G>A  | Silent            | WIPI1  | p.S312S  | WD repeat domain, pho     | 32 (0.00)  | 27 (0.22) | 0.59 |
| 11-01 | Gp3 | g.chr12:1005618C>G   | Missense Mutation | WNK1   | p.L1989V | WNK lysine deficient p    | 52 (0.02)  | 37 (0.30) | 0.79 |
| 11-01 | Gp3 | g.chr12:995182G>A    | Missense Mutation | WNK1   | p.V1738I | WNK lysine deficient p    | 126 (0.00) | 54 (0.19) | 0.49 |
| 11-01 | Gp3 | g.chr2:219735790G>T  | Missense Mutation | WNT6   | p.C41F   | wingless-type MMTV ir     | 28 (0.00)  | 34 (0.15) | 0.39 |
| 11-01 | Gp3 | g.chr17:25628959G>A  | Silent            | WSB1   | p.P31P   | WD repeat and SOCS b      | 53 (0.00)  | 49 (0.27) | 0.71 |
| 11-01 | Gp3 | g.chr17:6014212C>A   | Missense Mutation | WSCD1  | p.F377L  | WSC domain containing     | 65 (0.00)  | 25 (0.20) | 0.53 |
| 11-01 | Gp3 | g.chr16:69905713C>G  | Missense Mutation | WWP2   | p.H194Q  | WW domain containing      | 27 (0.00)  | 36 (0.36) | 0.96 |
| 11-01 | Gp3 | g.chr2:31572597C>G   | Missense Mutation | XDH    | p.S975T  | xanthine dehydrogenase    | 90 (0.00)  | 62 (0.16) | 0.43 |
| 11-01 | Gp3 | g.chr2:31572961C>T   | Silent            | XDH    | p.G920G  | xanthine dehydrogenase    | 81 (0.00)  | 35 (0.20) | 0.53 |
| 11-01 | Gp3 | g.chr2:31572971C>T   | Missense Mutation | XDH    | p.G917E  | xanthine dehydrogenase    | 77 (0.01)  | 38 (0.18) | 0.49 |
| 11-01 | Gp3 | g.chr3:39230720C>T   | Missense Mutation | XIRP1  | p.V73M   | xin actin-binding repeat  | 19 (0.00)  | 35 (0.20) | 0.53 |
| 11-01 | Gp3 | g.chrX:73064680G>C   | lincRNA           | XIST   |          | X inactive specific trans | 31 (0.00)  | 19 (0.32) | 0.53 |
| 11-01 | Gp3 | g.chrX:73066014G>A   | lincRNA           | XIST   |          | X inactive specific trans | 37 (0.00)  | 30 (0.23) | 0.39 |
| 11-01 | Gp3 | g.chrX:100183023C>T  | Missense Mutation | XKRX   | p.D91N   | XK, Kell blood group c    | 24 (0.00)  | 12 (0.42) | 0.69 |



|       |     |                      |                   |         |         |                                       |            |           |      |
|-------|-----|----------------------|-------------------|---------|---------|---------------------------------------|------------|-----------|------|
| 11-01 | Gp3 | g.chr3:14197916C>T   | Missense Mutation | XPC     | p.R651Q | xeroderma pigmentosum 80 (0.00)       | 51 (0.16)  | 0.42      |      |
| 11-01 | Gp3 | g.chr3:14214864C>T   | Intron            | XPC     |         | xeroderma pigmentosum 85 (0.00)       | 75 (0.15)  | 0.39      |      |
| 11-01 | Gp3 | g.chr6:43499282G>A   | Silent            | XPO5    | p.D825D | exportin 5                            | 68 (0.01)  | 35 (0.14) | 0.38 |
| 11-01 | Gp3 | g.chr16:28118864G>A  | Missense Mutation | XPO6    | p.P826S | exportin 6                            | 69 (0.00)  | 40 (0.17) | 0.47 |
| 11-01 | Gp3 | g.chr8:21840249G>T   | Missense Mutation | XPO7    | p.M401I | exportin 7                            | 67 (0.01)  | 28 (0.50) | 0.75 |
| 11-01 | Gp3 | g.chr2:217069111G>A  | Missense Mutation | XRCC5   | p.D726N | X-ray repair complement 61 (0.00)     | 23 (0.26)  | 0.70      |      |
| 11-01 | Gp3 | g.chr3:142145625G>T  | Missense Mutation | XRN1    | p.P123T | 5'-3' exoribonuclease 1               | 58 (0.00)  | 50 (0.16) | 0.43 |
| 11-01 | Gp3 | g.chr11:74570305A>G  | Silent            | XRRA1   | p.P348P | X-ray radiation resistance 41 (0.00)  | 28 (0.54)  | 1.43      |      |
| 11-01 | Gp3 | g.chr1:33245738G>A   | Missense Mutation | YARS    | p.P428S | tyrosyl-tRNA synthetase 53 (0.00)     | 29 (0.21)  | 0.55      |      |
| 11-01 | Gp3 | g.chr12:10856704G>C  | Missense Mutation | YBX3    | p.A275G | Y box binding protein 3               | 34 (0.00)  | 35 (0.14) | 0.38 |
| 11-01 | Gp3 | g.chr14:75290958G>A  | Splice Site       | YLPM1   |         | YLP motif containing 1                | 57 (0.00)  | 63 (0.17) | 0.47 |
| 11-01 | Gp3 | g.chr1:155629480C>T  | Missense Mutation | YY1AP1  | p.D730N | YY1 associated protein                | 38 (0.00)  | 68 (0.24) | 0.63 |
| 11-01 | Gp3 | g.chr1:155638432C>T  | Missense Mutation | YY1AP1  | p.D278N | YY1 associated protein                | 84 (0.00)  | 69 (0.16) | 0.43 |
| 11-01 | Gp3 | g.chrX:21875451C>T   | Silent            | YY2     | p.H283H | YY2 transcription factor              | 79 (0.00)  | 38 (0.24) | 0.39 |
| 11-01 | Gp3 | g.chr7:100350479G>A  | RNA               | ZAN     |         | zonadhesin (gene/pseud)               | 86 (0.01)  | 28 (0.29) | 0.76 |
| 11-01 | Gp3 | g.chr7:100350487C>T  | RNA               | ZAN     |         | zonadhesin (gene/pseud)               | 90 (0.00)  | 29 (0.21) | 0.55 |
| 11-01 | Gp3 | g.chr7:100350623C>T  | RNA               | ZAN     |         | zonadhesin (gene/pseud)               | 138 (0.00) | 42 (0.24) | 0.63 |
| 11-01 | Gp3 | g.chr7:100385500C>T  | RNA               | ZAN     |         | zonadhesin (gene/pseud)               | 15 (0.07)  | 24 (0.29) | 0.78 |
| 11-01 | Gp3 | g.chr1:244217175T>G  | Missense Mutation | ZBTB18  | p.C33W  | zinc finger and BTB domain 59 (0.00)  | 32 (0.16)  | 0.42      |      |
| 11-01 | Gp3 | g.chr6:109803106T>A  | Missense Mutation | ZBTB24  | p.I42F  | zinc finger and BTB domain 51 (0.00)  | 18 (0.56)  | 0.86      |      |
| 11-01 | Gp3 | g.chr6:109803107T>A  | Missense Mutation | ZBTB24  | p.L41F  | zinc finger and BTB domain 51 (0.00)  | 18 (0.56)  | 0.86      |      |
| 11-01 | Gp3 | g.chr19:36205531G>A  | Start Codon SNP   | ZBTB32  | p.M1I   | zinc finger and BTB domain 62 (0.02)  | 43 (0.19)  | 0.50      |      |
| 11-01 | Gp3 | g.chr19:36205548G>A  | Missense Mutation | ZBTB32  | p.R7K   | zinc finger and BTB domain 59 (0.00)  | 43 (0.19)  | 0.50      |      |
| 11-01 | Gp3 | g.chr9:129642044C>A  | Nonsense Mutation | ZBTB34  | p.C122* | zinc finger and BTB domain 142 (0.01) | 190 (0.22) | 0.59      |      |
| 11-01 | Gp3 | g.chr1:173854915G>A  | Missense Mutation | ZBTB37  | p.D389N | zinc finger and BTB domain 71 (0.00)  | 56 (0.14)  | 0.38      |      |
| 11-01 | Gp3 | g.chr1:22838327C>A   | Missense Mutation | ZBTB40  | p.Q721K | zinc finger and BTB domain 49 (0.00)  | 17 (0.35)  | 0.94      |      |
| 11-01 | Gp3 | g.chr9:129594868G>A  | Missense Mutation | ZBTB43  | p.R27H  | zinc finger and BTB domain 58 (0.00)  | 44 (0.16)  | 0.42      |      |
| 11-01 | Gp3 | g.chr6:144207284C>A  | Missense Mutation | ZC2HC1B | p.S69Y  | zinc finger, C2HC-type                | 41 (0.02)  | 39 (0.21) | 0.55 |
| 11-01 | Gp3 | g.chr14:75538298C>A  | Missense Mutation | ZC2HC1C | p.P341Q | zinc finger, C2HC-type                | 41 (0.00)  | 22 (0.23) | 0.61 |
| 11-01 | Gp3 | g.chr1:37941253G>T   | Silent            | ZC3H12A | p.V52V  | zinc finger CCCH-type                 | 19 (0.00)  | 35 (0.37) | 0.99 |
| 11-01 | Gp3 | g.chrX:64722464C>T   | Missense Mutation | ZC3H12B | p.P629L | zinc finger CCCH-type                 | 43 (0.00)  | 32 (0.41) | 0.68 |
| 11-01 | Gp3 | g.chr11:110036067G>T | Missense Mutation | ZC3H12C | p.D754Y | zinc finger CCCH-type                 | 53 (0.00)  | 30 (0.53) | 1.42 |
| 11-01 | Gp3 | g.chr6:149780766G>A  | Missense Mutation | ZC3H12D | p.A165V | zinc finger CCCH-type                 | 19 (0.00)  | 35 (0.37) | 0.99 |
| 11-01 | Gp3 | g.chr14:89075613C>T  | Missense Mutation | ZC3H14  | p.A619V | zinc finger CCCH-type                 | 29 (0.00)  | 24 (0.38) | 1.00 |
| 11-01 | Gp3 | g.chr16:88688781C>T  | Missense Mutation | ZC3H18  | p.A551V | zinc finger CCCH-type                 | 15 (0.00)  | 28 (0.18) | 0.48 |

|       |     |                     |                   |         |          |                                         |            |      |
|-------|-----|---------------------|-------------------|---------|----------|-----------------------------------------|------------|------|
| 11-01 | Gp3 | g.chr8:144620691G>C | Silent            | ZC3H3   | p.P282P  | zinc finger CCCH-type 29 (0.00)         | 33 (0.30)  | 0.81 |
| 11-01 | Gp3 | g.chr19:47588356C>G | Missense Mutation | ZC3H4   | p.G355A  | zinc finger CCCH-type 27 (0.00)         | 24 (0.67)  | 1.78 |
| 11-01 | Gp3 | g.chr2:113090034C>A | Missense Mutation | ZC3H6   | p.T1180N | zinc finger CCCH-type 151 (0.00)        | 129 (0.23) | 0.62 |
| 11-01 | Gp3 | g.chr8:17067949C>T  | Nonsense Mutation | ZDHHC2  | p.Q304*  | zinc finger, DHHC-type 123 (0.00)       | 27 (0.30)  | 0.44 |
| 11-01 | Gp3 | g.chr3:113672575G>A | Missense Mutation | ZDHHC23 | p.E64K   | zinc finger, DHHC-type 62 (0.02)        | 20 (0.35)  | 0.93 |
| 11-01 | Gp3 | g.chr11:57466832G>A | Missense Mutation | ZDHHC5  | p.A642T  | zinc finger, DHHC-type 76 (0.00)        | 43 (0.40)  | 1.05 |
| 11-01 | Gp3 | g.chr2:145156482G>A | Missense Mutation | ZEB2    | p.L758F  | zinc finger E-box binding 157 (0.00)    | 151 (0.43) | 1.15 |
| 11-01 | Gp3 | g.chr2:145157056G>A | Silent            | ZEB2    | p.V566V  | zinc finger E-box binding 85 (0.00)     | 56 (0.18)  | 0.48 |
| 11-01 | Gp3 | g.chr6:38029552G>A  | Splice Site       | ZFAND3  |          | zinc finger, AN1-type domain 43 (0.00)  | 19 (0.32)  | 0.84 |
| 11-01 | Gp3 | g.chr10:46111926C>T | Silent            | ZFAND4  | p.E714E  | zinc finger, AN1-type domain 50 (0.00)  | 27 (0.22)  | 0.59 |
| 11-01 | Gp3 | g.chr12:72030810C>A | Silent            | ZFC3H1  | p.V585V  | zinc finger, C3H1-type 59 (0.00)        | 48 (0.54)  | 1.44 |
| 11-01 | Gp3 | g.chr16:72821108C>A | Missense Mutation | ZFHX3   | p.K3689N | zinc finger homeobox 3 67 (0.00)        | 54 (0.22)  | 0.59 |
| 11-01 | Gp3 | g.chr16:72829442G>T | Nonsense Mutation | ZFHX3   | p.S2380* | zinc finger homeobox 3 51 (0.00)        | 31 (0.35)  | 0.95 |
| 11-01 | Gp3 | g.chr16:72829483C>T | Silent            | ZFHX3   | p.E2366E | zinc finger homeobox 3 105 (0.00)       | 47 (0.26)  | 0.68 |
| 11-01 | Gp3 | g.chr16:72845849G>A | Silent            | ZFHX3   | p.L1206L | zinc finger homeobox 3 85 (0.00)        | 42 (0.24)  | 0.63 |
| 11-01 | Gp3 | g.chr8:77616460C>A  | Missense Mutation | ZFHX4   | p.S46Y   | zinc finger homeobox 4 55 (0.00)        | 29 (0.21)  | 0.55 |
| 11-01 | Gp3 | g.chr8:77763698G>T  | Missense Mutation | ZFHX4   | p.G1514V | zinc finger homeobox 4 125 (0.00)       | 121 (0.17) | 0.44 |
| 11-01 | Gp3 | g.chr8:77764307C>G  | Missense Mutation | ZFHX4   | p.A1717G | zinc finger homeobox 4 71 (0.00)        | 56 (0.77)  | 2.05 |
| 11-01 | Gp3 | g.chr19:36831906A>G | Silent            | ZFP14   | p.H274H  | ZFP14 zinc finger protein 58 (0.00)     | 54 (0.26)  | 0.69 |
| 11-01 | Gp3 | g.chr11:58381770C>A | Silent            | ZFP91   | p.L352L  | ZFP91 zinc finger protein 133 (0.00)    | 126 (0.14) | 0.38 |
| 11-01 | Gp3 | g.chr8:106813343G>T | Missense Mutation | ZFPM2   | p.D345Y  | zinc finger protein, FOC 178 (0.00)     | 104 (0.28) | 0.74 |
| 11-01 | Gp3 | g.chr5:32400212G>A  | Missense Mutation | ZFR     | p.P538L  | zinc finger RNA binding 72 (0.00)       | 42 (0.17)  | 0.44 |
| 11-01 | Gp3 | g.chrX:24229394C>T  | Silent            | ZFX     | p.D773D  | zinc finger protein, X-linked 34 (0.00) | 32 (0.56)  | 0.94 |
| 11-01 | Gp3 | g.chr14:73448496C>T | Splice Site       | ZFYVE1  |          | zinc finger, FYVE domain 66 (0.00)      | 35 (0.17)  | 0.46 |
| 11-01 | Gp3 | g.chr14:73490835C>T | Missense Mutation | ZFYVE1  | p.E128K  | zinc finger, FYVE domain 42 (0.00)      | 34 (0.18)  | 0.47 |
| 11-01 | Gp3 | g.chr14:73490857C>G | Silent            | ZFYVE1  | p.V120V  | zinc finger, FYVE domain 34 (0.00)      | 31 (0.16)  | 0.43 |
| 11-01 | Gp3 | g.chr14:73490940G>A | Nonsense Mutation | ZFYVE1  | p.Q93*   | zinc finger, FYVE domain 68 (0.00)      | 42 (0.24)  | 0.63 |
| 11-01 | Gp3 | g.chr14:68268932G>T | Missense Mutation | ZFYVE26 | p.F501L  | zinc finger, FYVE domain 21 (0.00)      | 42 (0.14)  | 0.38 |
| 11-01 | Gp3 | g.chr1:52734147G>A  | Missense Mutation | ZFYVE9  | p.R823K  | zinc finger, FYVE domain 34 (0.00)      | 22 (0.23)  | 0.61 |
| 11-01 | Gp3 | g.chr1:52734234C>T  | Missense Mutation | ZFYVE9  | p.S852F  | zinc finger, FYVE domain 40 (0.00)      | 20 (0.45)  | 1.20 |
| 11-01 | Gp3 | g.chr8:124266526G>C | Missense Mutation | ZHX1    | p.T554S  | zinc fingers and homeodomain 64 (0.00)  | 52 (0.19)  | 0.51 |
| 11-01 | Gp3 | g.chr8:123965725G>A | Missense Mutation | ZHX2    | p.D659N  | zinc fingers and homeodomain 52 (0.00)  | 29 (0.28)  | 0.74 |
| 11-01 | Gp3 | g.chr20:39831429C>A | Nonsense Mutation | ZHX3    | p.E710*  | zinc fingers and homeodomain 61 (0.00)  | 35 (0.29)  | 0.76 |
| 11-01 | Gp3 | g.chr20:39831430C>G | Silent            | ZHX3    | p.L709L  | zinc fingers and homeodomain 60 (0.00)  | 35 (0.29)  | 0.76 |
| 11-01 | Gp3 | g.chr3:147131308C>A | Silent            | ZIC1    | p.L438L  | Zic family member 1 72 (0.00)           | 49 (0.16)  | 0.44 |

|       |     |                     |                   |          |          |                          |            |            |      |
|-------|-----|---------------------|-------------------|----------|----------|--------------------------|------------|------------|------|
| 11-01 | Gp3 | g.chr16:25258127C>A | Nonsense Mutation | ZKSCAN2  | p.E464*  | zinc finger with KRAB    | 55 (0.00)  | 54 (0.48)  | 1.28 |
| 11-01 | Gp3 | g.chr3:44598952G>T  | Missense Mutation | ZKSCAN7  | p.G138V  | zinc finger with KRAB    | 37 (0.00)  | 40 (0.17)  | 0.47 |
| 11-01 | Gp3 | g.chr1:40733511C>T  | Silent            | ZMPSTE24 | p.F108F  | zinc metalloproteinase   | 113 (0.00) | 117 (0.31) | 0.82 |
| 11-01 | Gp3 | g.chr1:35579310A>G  | Missense Mutation | ZMYM1    | p.T627A  | zinc finger, MYM-type    | 37 (0.00)  | 34 (0.21)  | 0.55 |
| 11-01 | Gp3 | g.chr13:20611050G>A | Splice Site       | ZMYM2    |          | zinc finger, MYM-type    | 16 (0.00)  | 18 (0.28)  | 0.74 |
| 11-01 | Gp3 | g.chr20:45875140G>A | Silent            | ZMYND8   | p.N607N  | zinc finger, MYND-type   | 31 (0.00)  | 16 (0.44)  | 1.17 |
| 11-01 | Gp3 | g.chr19:58131910C>G | Missense Mutation | ZNF134   | p.F141L  | zinc finger protein 134  | 19 (0.00)  | 22 (0.23)  | 0.61 |
| 11-01 | Gp3 | g.chr19:19825225C>T | Silent            | ZNF14    | p.Q25Q   | zinc finger protein 14   | 72 (0.00)  | 35 (0.17)  | 0.46 |
| 11-01 | Gp3 | g.chr4:337681G>A    | Silent            | ZNF141   | p.R38R   | zinc finger protein 141  | 128 (0.00) | 59 (0.44)  | 1.18 |
| 11-01 | Gp3 | g.chr2:219508755C>A | Silent            | ZNF142   | p.V828V  | zinc finger protein 142  | 30 (0.00)  | 44 (0.27)  | 0.73 |
| 11-01 | Gp3 | g.chr2:219508989C>A | Missense Mutation | ZNF142   | p.L750F  | zinc finger protein 142  | 46 (0.00)  | 17 (0.47)  | 1.25 |
| 11-01 | Gp3 | g.chr2:219509561G>A | Silent            | ZNF142   | p.L560L  | zinc finger protein 142  | 58 (0.00)  | 44 (0.16)  | 0.42 |
| 11-01 | Gp3 | g.chr3:124952685C>A | Silent            | ZNF148   | p.L295L  | zinc finger protein 148  | 40 (0.00)  | 16 (0.44)  | 1.17 |
| 11-01 | Gp3 | g.chr8:146156272C>A | Missense Mutation | ZNF16    | p.C634F  | zinc finger protein 16   | 48 (0.00)  | 18 (0.28)  | 0.74 |
| 11-01 | Gp3 | g.chr19:53572995C>T | Silent            | ZNF160   | p.K264K  | zinc finger protein 160  | 41 (0.00)  | 12 (0.50)  | 1.33 |
| 11-01 | Gp3 | g.chr9:97062180G>T  | Missense Mutation | ZNF169   | p.G114C  | zinc finger protein 169  | 37 (0.00)  | 38 (0.18)  | 0.49 |
| 11-01 | Gp3 | g.chr16:71509675C>T | Missense Mutation | ZNF19    | p.E217K  | zinc finger protein 19   | 58 (0.02)  | 22 (0.64)  | 1.70 |
| 11-01 | Gp3 | g.chr3:44673992G>T  | Missense Mutation | ZNF197   | p.V224L  | zinc finger protein 197  | 53 (0.00)  | 38 (0.42)  | 1.12 |
| 11-01 | Gp3 | g.chr19:58152111A>G | Missense Mutation | ZNF211   | p.E151G  | zinc finger protein 211  | 17 (0.00)  | 19 (0.26)  | 0.70 |
| 11-01 | Gp3 | g.chr19:58152134G>A | Missense Mutation | ZNF211   | p.V159M  | zinc finger protein 211  | 17 (0.00)  | 18 (0.28)  | 0.74 |
| 11-01 | Gp3 | g.chr11:7022012A>G  | Missense Mutation | ZNF214   | p.V301A  | zinc finger protein 214  | 87 (0.01)  | 42 (0.17)  | 0.44 |
| 11-01 | Gp3 | g.chr11:6953646G>A  | Missense Mutation | ZNF215   | p.R48H   | zinc finger protein 215  | 25 (0.00)  | 18 (0.39)  | 1.04 |
| 11-01 | Gp3 | g.chr19:44571170G>T | Nonsense Mutation | ZNF223   | p.E507*  | zinc finger protein 223  | 38 (0.00)  | 37 (0.19)  | 0.50 |
| 11-01 | Gp3 | g.chr19:44612258G>A | Missense Mutation | ZNF224   | p.E649K  | zinc finger protein 224  | 55 (0.00)  | 22 (0.32)  | 0.85 |
| 11-01 | Gp3 | g.chr19:44622693G>A | Missense Mutation | ZNF225   | p.M67I   | zinc finger protein 225  | 71 (0.00)  | 21 (0.29)  | 0.76 |
| 11-01 | Gp3 | g.chr17:5009793C>A  | Nonsense Mutation | ZNF232   | p.E221*  | zinc finger protein 232  | 25 (0.00)  | 40 (0.40)  | 1.07 |
| 11-01 | Gp3 | g.chr17:5012756G>T  | Missense Mutation | ZNF232   | p.P144H  | zinc finger protein 232  | 115 (0.00) | 51 (0.20)  | 0.52 |
| 11-01 | Gp3 | g.chr19:44792117C>G | Missense Mutation | ZNF235   | p.E491Q  | zinc finger protein 235  | 21 (0.00)  | 16 (0.31)  | 0.83 |
| 11-01 | Gp3 | g.chr10:44052373G>A | Silent            | ZNF239   | p.S385S  | zinc finger protein 239  | 46 (0.00)  | 39 (0.15)  | 0.41 |
| 11-01 | Gp3 | g.chr16:89799811G>A | Missense Mutation | ZNF276   | p.R424H  | zinc finger protein 276  | 109 (0.01) | 92 (0.18)  | 0.49 |
| 11-01 | Gp3 | g.chr22:22869292C>T | Silent            | ZNF280A  | p.Q221Q  | zinc finger protein 280A | 56 (0.00)  | 30 (0.27)  | 0.71 |
| 11-01 | Gp3 | g.chrX:129349905A>G | Silent            | ZNF280C  | p.H566H  | zinc finger protein 280C | 74 (0.00)  | 104 (0.38) | 0.64 |
| 11-01 | Gp3 | g.chr1:200376360G>A | Missense Mutation | ZNF281   | p.T825M  | zinc finger protein 281  | 72 (0.01)  | 23 (0.35)  | 0.93 |
| 11-01 | Gp3 | g.chr6:43305709C>A  | Missense Mutation | ZNF318   | p.E2009D | zinc finger protein 318  | 52 (0.00)  | 41 (0.27)  | 0.72 |
| 11-01 | Gp3 | g.chr19:58639475C>A | Missense Mutation | ZNF329   | p.D466Y  | zinc finger protein 329  | 19 (0.00)  | 28 (0.18)  | 0.48 |

|       |     |                     |                   |         |          |                             |            |            |      |
|-------|-----|---------------------|-------------------|---------|----------|-----------------------------|------------|------------|------|
| 11-01 | Gp3 | g.chr19:58639734G>A | Silent            | ZNF329  | p.S379S  | zinc finger protein 329     | 21 (0.00)  | 10 (0.70)  | 1.87 |
| 11-01 | Gp3 | g.chr19:58640814T>A | Silent            | ZNF329  | p.V19V   | zinc finger protein 329     | 94 (0.00)  | 115 (0.21) | 0.56 |
| 11-01 | Gp3 | g.chr20:44578487G>A | Silent            | ZNF335  | p.T1207T | zinc finger protein 335     | 32 (0.00)  | 37 (0.22)  | 0.58 |
| 11-01 | Gp3 | g.chr20:44592442C>T | Silent            | ZNF335  | p.E430E  | zinc finger protein 335     | 72 (0.00)  | 85 (0.18)  | 0.47 |
| 11-01 | Gp3 | g.chr10:43088660G>A | Missense Mutation | ZNF33B  | p.P580S  | zinc finger protein 33B     | 38 (0.00)  | 19 (0.26)  | 0.70 |
| 11-01 | Gp3 | g.chr5:178139643G>A | Silent            | ZNF354A | p.C412C  | zinc finger protein 354A45  | (0.00)     | 8 (0.62)   | 1.67 |
| 11-01 | Gp3 | g.chr5:178140571G>C | Nonsense Mutation | ZNF354A | p.S103*  | zinc finger protein 354A27  | (0.00)     | 42 (0.17)  | 0.44 |
| 11-01 | Gp3 | g.chr10:43019155C>T | RNA               | ZNF37BP |          | zinc finger protein 37B, 45 | (0.00)     | 31 (0.39)  | 1.03 |
| 11-01 | Gp3 | g.chr2:180634229C>A | Splice Site       | ZNF385B |          | zinc finger protein 385B38  | (0.00)     | 24 (0.21)  | 0.56 |
| 11-01 | Gp3 | g.chr3:21792394C>T  | Missense Mutation | ZNF385D | p.M5I    | zinc finger protein 385E54  | (0.00)     | 50 (0.20)  | 0.53 |
| 11-01 | Gp3 | g.chr18:72343595C>T | Missense Mutation | ZNF407  | p.S207F  | zinc finger protein 407     | 211 (0.00) | 166 (0.21) | 0.56 |
| 11-01 | Gp3 | g.chr19:9639620C>T  | Silent            | ZNF426  | p.K329K  | zinc finger protein 426     | 17 (0.00)  | 35 (0.29)  | 0.76 |
| 11-01 | Gp3 | g.chr19:21366341C>G | Missense Mutation | ZNF431  | p.S412C  | zinc finger protein 431     | 28 (0.00)  | 20 (0.45)  | 1.20 |
| 11-01 | Gp3 | g.chr19:21366517C>A | Missense Mutation | ZNF431  | p.L471I  | zinc finger protein 431     | 23 (0.00)  | 27 (0.48)  | 1.28 |
| 11-01 | Gp3 | g.chr19:12129080C>A | Missense Mutation | ZNF433  | p.V14L   | zinc finger protein 433     | 28 (0.00)  | 27 (0.22)  | 0.59 |
| 11-01 | Gp3 | g.chr10:31134018G>A | Missense Mutation | ZNF438  | p.R787W  | zinc finger protein 438     | 30 (0.00)  | 19 (0.53)  | 1.40 |
| 11-01 | Gp3 | g.chr10:31134132C>G | Missense Mutation | ZNF438  | p.G749R  | zinc finger protein 438     | 34 (0.00)  | 9 (0.56)   | 1.48 |
| 11-01 | Gp3 | g.chr19:37149263G>C | Missense Mutation | ZNF461  | p.P25R   | zinc finger protein 461     | 116 (0.00) | 95 (0.29)  | 0.79 |
| 11-01 | Gp3 | g.chr19:57088944C>G | Missense Mutation | ZNF470  | p.L383V  | zinc finger protein 470     | 90 (0.00)  | 33 (0.15)  | 0.40 |
| 11-01 | Gp3 | g.chr19:11917692C>T | Silent            | ZNF491  | p.F308F  | zinc finger protein 491     | 23 (0.00)  | 18 (0.39)  | 1.04 |
| 11-01 | Gp3 | g.chr19:22836802G>A | Missense Mutation | ZNF492  | p.V39I   | zinc finger protein 492     | 59 (0.00)  | 22 (0.32)  | 0.85 |
| 11-01 | Gp3 | g.chr9:99521949G>T  | Missense Mutation | ZNF510  | p.T388K  | zinc finger protein 510     | 115 (0.00) | 60 (0.17)  | 0.44 |
| 11-01 | Gp3 | g.chr4:10447024T>C  | Missense Mutation | ZNF518B | p.N310S  | zinc finger protein 518B81  | (0.00)     | 23 (0.22)  | 0.58 |
| 11-01 | Gp3 | g.chr4:10447849G>A  | Missense Mutation | ZNF518B | p.P35L   | zinc finger protein 518B180 | (0.01)     | 90 (0.24)  | 0.65 |
| 11-01 | Gp3 | g.chr19:42728595C>A | Missense Mutation | ZNF526  | p.Q14K   | zinc finger protein 526     | 19 (0.00)  | 23 (0.43)  | 1.16 |
| 11-01 | Gp3 | g.chr19:57888677G>A | Silent            | ZNF547  | p.E111E  | zinc finger protein 547     | 40 (0.00)  | 24 (0.21)  | 0.56 |
| 11-01 | Gp3 | g.chr19:58042464G>A | Silent            | ZNF549  | p.V20V   | zinc finger protein 549     | 33 (0.00)  | 19 (0.42)  | 1.12 |
| 11-01 | Gp3 | g.chr19:8922196C>A  | Nonsense Mutation | ZNF558  | p.E324*  | zinc finger protein 558     | 44 (0.00)  | 19 (0.32)  | 0.84 |
| 11-01 | Gp3 | g.chr19:37488178C>A | Missense Mutation | ZNF568  | p.H465N  | zinc finger protein 568     | 70 (0.00)  | 24 (0.33)  | 0.89 |
| 11-01 | Gp3 | g.chr19:37975011C>G | Missense Mutation | ZNF570  | p.Q163E  | zinc finger protein 570     | 176 (0.00) | 181 (0.18) | 0.47 |
| 11-01 | Gp3 | g.chr19:53014121C>A | Missense Mutation | ZNF578  | p.H163N  | zinc finger protein 578     | 103 (0.00) | 120 (0.48) | 1.29 |
| 11-01 | Gp3 | g.chr17:5085912T>A  | Missense Mutation | ZNF594  | p.K547I  | zinc finger protein 594     | 93 (0.00)  | 31 (0.26)  | 0.69 |
| 11-01 | Gp3 | g.chr19:35250239G>T | Nonsense Mutation | ZNF599  | p.Y489*  | zinc finger protein 599     | 29 (0.00)  | 25 (0.20)  | 0.53 |
| 11-01 | Gp3 | g.chr19:58489761G>A | Missense Mutation | ZNF606  | p.R763C  | zinc finger protein 606     | 48 (0.00)  | 25 (0.24)  | 0.64 |
| 11-01 | Gp3 | g.chr15:64967927C>T | Silent            | ZNF609  | p.P958P  | zinc finger protein 609     | 53 (0.00)  | 73 (0.30)  | 0.80 |

|       |     |                     |                   |         |         |                          |            |            |      |
|-------|-----|---------------------|-------------------|---------|---------|--------------------------|------------|------------|------|
| 11-01 | Gp3 | g.chr19:53210013C>T | Missense Mutation | ZNF611  | p.G99R  | zinc finger protein 611  | 143 (0.00) | 71 (0.20)  | 0.53 |
| 11-01 | Gp3 | g.chr19:52443528G>A | Missense Mutation | ZNF613  | p.A28T  | zinc finger protein 613  | 45 (0.00)  | 40 (0.15)  | 0.40 |
| 11-01 | Gp3 | g.chr9:116795008G>A | Splice Site       | ZNF618  | p.E390K | zinc finger protein 618  | 103 (0.01) | 36 (0.19)  | 0.52 |
| 11-01 | Gp3 | g.chr3:40558247G>A  | Missense Mutation | ZNF620  | p.G274S | zinc finger protein 620  | 28 (0.00)  | 31 (0.35)  | 0.95 |
| 11-01 | Gp3 | g.chr19:20807811C>G | Missense Mutation | ZNF626  | p.G291A | zinc finger protein 626  | 82 (0.00)  | 46 (0.15)  | 0.41 |
| 11-01 | Gp3 | g.chr17:47395033C>A | Missense Mutation | ZNF652  | p.V19L  | zinc finger protein 652  | 22 (0.00)  | 43 (0.16)  | 0.43 |
| 11-01 | Gp3 | g.chr3:88189985C>A  | Missense Mutation | ZNF654  | p.L509I | zinc finger protein 654  | 43 (0.00)  | 30 (0.30)  | 0.80 |
| 11-01 | Gp3 | g.chr9:40774125C>A  | Missense Mutation | ZNF658  | p.D384Y | zinc finger protein 658  | 128 (0.00) | 163 (0.19) | 0.51 |
| 11-01 | Gp3 | g.chr3:42950294C>A  | Missense Mutation | ZNF662  | p.P75Q  | zinc finger protein 662  | 82 (0.00)  | 48 (0.31)  | 0.83 |
| 11-01 | Gp3 | g.chr1:247265351G>A | Missense Mutation | ZNF669  | p.S109F | zinc finger protein 669  | 54 (0.00)  | 38 (0.21)  | 0.44 |
| 11-01 | Gp3 | g.chr19:53740505C>T | Missense Mutation | ZNF677  | p.C492Y | zinc finger protein 677  | 27 (0.00)  | 21 (0.24)  | 0.63 |
| 11-01 | Gp3 | g.chr19:53747003C>T | Missense Mutation | ZNF677  | p.E55K  | zinc finger protein 677  | 55 (0.00)  | 25 (0.28)  | 0.75 |
| 11-01 | Gp3 | g.chr19:20117036G>A | Silent            | ZNF682  | p.Y425Y | zinc finger protein 682  | 18 (0.00)  | 18 (0.28)  | 0.74 |
| 11-01 | Gp3 | g.chr1:247163257G>C | Missense Mutation | ZNF695  | p.I41M  | zinc finger protein 695  | 57 (0.00)  | 15 (0.33)  | 0.70 |
| 11-01 | Gp3 | g.chr19:9407226C>T  | Missense Mutation | ZNF699  | p.G285E | zinc finger protein 699  | 70 (0.00)  | 39 (0.23)  | 0.62 |
| 11-01 | Gp3 | g.chr19:12058046G>A | Nonsense Mutation | ZNF700  | p.W38*  | zinc finger protein 700  | 69 (0.00)  | 26 (0.23)  | 0.62 |
| 11-01 | Gp3 | g.chr19:12059243G>A | Missense Mutation | ZNF700  | p.G135D | zinc finger protein 700  | 97 (0.01)  | 74 (0.24)  | 0.65 |
| 11-01 | Gp3 | g.chr8:81555339C>G  | Missense Mutation | ZNF704  | p.G353A | zinc finger protein 704  | 17 (0.00)  | 31 (0.29)  | 0.97 |
| 11-01 | Gp3 | g.chr19:23159109C>T | Missense Mutation | ZNF728  | p.E344K | zinc finger protein 728  | 19 (0.00)  | 26 (0.54)  | 1.44 |
| 11-01 | Gp3 | g.chr6:35258148C>A  | Missense Mutation | ZNF76   | p.H180N | zinc finger protein 76   | 102 (0.00) | 70 (0.23)  | 0.61 |
| 11-01 | Gp3 | g.chr19:53958558G>A | RNA               | ZNF761  |         | zinc finger protein 761  | 142 (0.00) | 77 (0.14)  | 0.38 |
| 11-01 | Gp3 | g.chr19:52794368C>T | Missense Mutation | ZNF766  | p.H442Y | zinc finger protein 766  | 74 (0.00)  | 63 (0.14)  | 0.38 |
| 11-01 | Gp3 | g.chr19:2934646C>A  | Missense Mutation | ZNF77   | p.G160V | zinc finger protein 77   | 49 (0.00)  | 76 (0.21)  | 0.56 |
| 11-01 | Gp3 | g.chr19:40541408G>A | Missense Mutation | ZNF780B | p.A305V | zinc finger protein 780B | 62 (0.00)  | 15 (0.47)  | 1.24 |
| 11-01 | Gp3 | g.chr9:130197465C>T | Missense Mutation | ZNF79   | p.P68S  | zinc finger protein 79   | 42 (0.00)  | 42 (0.17)  | 0.44 |
| 11-01 | Gp3 | g.chr19:58806238C>A | Missense Mutation | ZNF8    | p.S355Y | zinc finger protein 8    | 55 (0.00)  | 27 (0.22)  | 0.59 |
| 11-01 | Gp3 | g.chr19:53056552C>A | Missense Mutation | ZNF808  | p.P128H | zinc finger protein 808  | 200 (0.00) | 205 (0.26) | 0.70 |
| 11-01 | Gp3 | g.chr19:53994910C>G | Missense Mutation | ZNF813  | p.T475R | zinc finger protein 813  | 41 (0.00)  | 31 (0.26)  | 0.69 |
| 11-01 | Gp3 | g.chr19:58386094G>C | Missense Mutation | ZNF814  | p.H222D | zinc finger protein 814  | 54 (0.00)  | 31 (0.19)  | 0.52 |
| 11-01 | Gp3 | g.chr19:11833700C>A | Nonsense Mutation | ZNF823  | p.E217* | zinc finger protein 823  | 93 (0.00)  | 47 (0.26)  | 0.68 |
| 11-01 | Gp3 | g.chr19:11833745C>A | Missense Mutation | ZNF823  | p.V202F | zinc finger protein 823  | 66 (0.00)  | 32 (0.38)  | 1.00 |
| 11-01 | Gp3 | g.chr19:20607666G>T | RNA               | ZNF826P |         | zinc finger protein 826, | 50 (0.00)  | 29 (0.21)  | 0.55 |
| 11-01 | Gp3 | g.chr19:37405911C>T | Missense Mutation | ZNF829  | p.E18K  | zinc finger protein 829  | 28 (0.04)  | 18 (0.33)  | 0.89 |
| 11-01 | Gp3 | g.chr7:149544896C>T | Missense Mutation | ZNF862  | p.P105L | zinc finger protein 862  | 71 (0.00)  | 31 (0.16)  | 0.43 |
| 11-01 | Gp3 | g.chr19:52877648G>A | Missense Mutation | ZNF880  | p.G79D  | zinc finger protein 880  | 69 (0.01)  | 29 (0.52)  | 1.38 |

|       |     |                      |                   |              |          |                            |             |            |      |
|-------|-----|----------------------|-------------------|--------------|----------|----------------------------|-------------|------------|------|
| 11-01 | Gp3 | g.chr19:20215064G>A  | Missense Mutation | ZNF90        | p.R7K    | zinc finger protein 90     | 43 (0.00)   | 11 (0.55)  | 1.45 |
| 11-01 | Gp3 | g.chr19:20229204G>T  | Nonsense Mutation | ZNF90        | p.G281*  | zinc finger protein 90     | 74 (0.01)   | 80 (0.45)  | 1.20 |
| 11-01 | Gp3 | g.chr16:21222846C>A  | Missense Mutation | ZP2          | p.G8V    | zona pellucida glycopro 18 | (0.00)      | 24 (0.21)  | 0.56 |
| 11-01 | Gp3 | g.chr7:76062873G>A   | Missense Mutation | ZP3          | p.V208M  | zona pellucida glycopro 26 | (0.00)      | 17 (0.29)  | 0.78 |
| 11-01 | Gp3 | g.chr7:76062947C>G   | Silent            | ZP3          | p.T232T  | zona pellucida glycopro 29 | (0.00)      | 22 (0.77)  | 2.06 |
| 11-01 | Gp3 | g.chr6:28365808C>T   | Silent            | ZSCAN12      | p.E125E  | zinc finger and SCAN d 109 | (0.00)      | 46 (0.20)  | 0.52 |
| 11-01 | Gp3 | g.chr7:99655333C>T   | Missense Mutation | ZSCAN21      | p.P138S  | zinc finger and SCAN d 52  | (0.00)      | 32 (0.19)  | 0.50 |
| 11-01 | Gp3 | g.chr6:28403261C>A   | Nonsense Mutation | ZSCAN23      | p.E178*  | zinc finger and SCAN d 63  | (0.00)      | 31 (0.16)  | 0.43 |
| 11-01 | Gp3 | g.chr19:58189825C>T  | Missense Mutation | ZSCAN4       | p.S285F  | zinc finger and SCAN d 67  | (0.00)      | 43 (0.26)  | 0.68 |
| 11-01 | Gp3 | g.chr2:187694526G>T  | Silent            | ZSWIM2       | p.G341G  | zinc finger, SWIM-type 44  | (0.00)      | 32 (0.16)  | 0.42 |
| 11-01 | Gp3 | g.chr1:45553766G>A   | Missense Mutation | ZSWIM5       | p.H247Y  | zinc finger, SWIM-type 42  | (0.00)      | 63 (0.16)  | 0.42 |
| 11-01 | Gp3 | g.chr6:116987961C>T  | Missense Mutation | ZUFSP        | p.S132N  | zinc finger with UFM1-     | 78 (0.01)   | 21 (0.52)  | 0.81 |
| 11-01 | Gp3 | g.chr11:113614565G>T | Silent            | ZW10         | p.A490A  | zw10 kinetochore protei    | 61 (0.00)   | 29 (0.17)  | 0.46 |
| 11-01 | Gp3 | g.chr1:53279323G>A   | Missense Mutation | ZYG11B       | p.G604E  | zyg-11 family member I     | 42 (0.00)   | 36 (0.25)  | 0.67 |
| 11-01 | Gp3 | g.chr17:3984700C>A   | Missense Mutation | ZZEF1        | p.M933I  | zinc finger, ZZ-type wit   | 78 (0.01)   | 41 (0.44)  | 1.17 |
| 11-01 | Gp3 | g.chr17:4007959G>A   | Missense Mutation | ZZEF1        | p.A514V  | zinc finger, ZZ-type wit   | 32 (0.00)   | 34 (0.24)  | 0.63 |
| 11-01 | Gp4 | g.chr13:95839106C>A  | Missense Mutation | ABCC4        | p.S465I  | ATP-binding cassette, s    | 15 (0.00)   | 35 (0.14)  | 0.38 |
| 11-01 | Gp4 | g.chr12:109629418G>A | Splice Site       | ACACB        | p.S715S  | acetyl-CoA carboxylase     | 19 (0.00)   | 39 (0.13)  | 0.46 |
| 11-01 | Gp4 | g.chr1:26669305G>T   | Silent            | AIM1L        | p.L174L  | absent in melanoma 1-li    | 17 (0.00)   | 34 (0.15)  | 0.39 |
| 11-01 | Gp4 | g.chr15:83346037C>T  | Missense Mutation | AP3B2        | p.D461N  | adaptor-related protein    | c 55 (0.00) | 65 (0.15)  | 0.41 |
| 11-01 | Gp4 | g.chr19:36362848G>T  | Missense Mutation | APLP1        | p.D254Y  | amyloid beta (A4) precu    | 20 (0.00)   | 49 (0.16)  | 0.44 |
| 11-01 | Gp4 | g.chr22:39441146C>T  | Silent            | APOBEC3F     | p.Y124Y  | apolipoprotein B mRNA      | 24 (0.00)   | 35 (0.14)  | 0.38 |
| 11-01 | Gp4 | g.chr5:148997780C>T  | Missense Mutation | ARHGEF37     | p.R234W  | Rho guanine nucleotide     | 23 (0.00)   | 55 (0.15)  | 0.39 |
| 11-01 | Gp4 | g.chr1:150807109G>A  | Silent            | ARNT         | p.I236I  | aryl hydrocarbon recept    | 26 (0.00)   | 23 (0.26)  | 0.70 |
| 11-01 | Gp4 | g.chr12:32481295A>C  | Missense Mutation | BICD1        | p.I636L  | bicaudal D homolog 1       | (150 (0.00) | 86 (0.33)  | 0.87 |
| 11-01 | Gp4 | g.chr3:53806865C>G   | Silent            | CACNA1D      | p.L1335L | calcium channel, voltag    | 34 (0.00)   | 36 (0.17)  | 0.44 |
| 11-01 | Gp4 | g.chr16:83712004G>A  | Silent            | CDH13        | p.V539V  | cadherin 13                | 40 (0.00)   | 40 (0.15)  | 0.40 |
| 11-01 | Gp4 | g.chr16:66413370C>T  | Missense Mutation | CDH5         | p.R44C   | cadherin 5, type 2 (vasc   | 39 (0.00)   | 49 (0.24)  | 0.65 |
| 11-01 | Gp4 | g.chr3:74411045C>A   | Nonsense Mutation | CNTN3        | p.E454*  | contactin 3 (plasmacyto    | 29 (0.00)   | 42 (0.14)  | 0.38 |
| 11-01 | Gp4 | g.chr1:34002670G>A   | Silent            | CSMD2        | p.D3277D | CUB and Sushi multiple     | 19 (0.00)   | 27 (0.19)  | 0.49 |
| 11-01 | Gp4 | g.chr10:53457519C>T  | Silent            | CSTF2T       | p.E597E  | cleavage stimulation fac   | 17 (0.00)   | 21 (0.24)  | 0.63 |
| 11-01 | Gp4 | g.chr18:1768925G>T   | lincRNA           | CTD-2015H3.2 |          |                            | 17 (0.00)   | 21 (0.24)  | 0.63 |
| 11-01 | Gp4 | g.chr19:15739436G>A  | RNA               | CYP4F8       |          | cytochrome P450, famil     | 20 (0.00)   | 37 (0.16)  | 0.43 |
| 11-01 | Gp4 | g.chr6:39856524G>A   | Silent            | DAAM2        | p.K710K  | dishevelled associated a   | 22 (0.00)   | 34 (0.15)  | 0.39 |
| 11-01 | Gp4 | g.chr8:88885877G>A   | Missense Mutation | DCAF4L2      | p.T108M  | DDB1 and CUL4 associ       | 96 (0.01)   | 140 (0.20) | 0.72 |

|       |     |                      |                   |           |          |                                    |            |            |      |
|-------|-----|----------------------|-------------------|-----------|----------|------------------------------------|------------|------------|------|
| 11-01 | Gp4 | g.chr3:52404493G>A   | Splice Site       | DNAH1     | p.G2087S | dynein, axonemal, heavy            | 28 (0.00)  | 39 (0.21)  | 0.55 |
| 11-01 | Gp4 | g.chr6:38702324G>A   | Missense Mutation | DNAH8     | p.D12N   | dynein, axonemal, heavy            | 16 (0.00)  | 27 (0.19)  | 0.49 |
| 11-01 | Gp4 | g.chr17:41852181G>C  | Missense Mutation | DUSP3     | p.T84R   | dual specificity phosphatase       | 21 (0.00)  | 30 (0.17)  | 0.44 |
| 11-01 | Gp4 | g.chr16:23711912C>T  | Silent            | ERN2      | p.Q439Q  | endoplasmic reticulum translocator | 30 (0.00)  | 31 (0.16)  | 0.43 |
| 11-01 | Gp4 | g.chr11:108384306C>T | Missense Mutation | EXPH5     | p.S643N  | exophilin 5                        | 21 (0.00)  | 27 (0.19)  | 0.49 |
| 11-01 | Gp4 | g.chr19:8181642C>T   | Missense Mutation | FBN3      | p.G1210S | fibrillin 3                        | 27 (0.04)  | 23 (0.26)  | 0.70 |
| 11-01 | Gp4 | g.chr20:6075611G>A   | Missense Mutation | FERMT1    | p.L372F  | fermitin family member 17          | 17 (0.00)  | 28 (0.21)  | 0.57 |
| 11-01 | Gp4 | g.chr7:121942866C>T  | Silent            | FEZF1     | p.G352G  | FEZ family zinc finger 1           | 16 (0.00)  | 19 (0.37)  | 0.98 |
| 11-01 | Gp4 | g.chr15:44211694G>A  | Missense Mutation | FRMD5     | p.P98S   | FERM domain containing protein     | 27 (0.00)  | 43 (0.23)  | 0.62 |
| 11-01 | Gp4 | g.chr13:99907461C>T  | Silent            | GPR18     | p.L222L  | G protein-coupled receptor         | 20 (0.00)  | 26 (0.23)  | 0.62 |
| 11-01 | Gp4 | g.chr13:99907462A>T  | Missense Mutation | GPR18     | p.L222Q  | G protein-coupled receptor         | 19 (0.00)  | 26 (0.23)  | 0.62 |
| 11-01 | Gp4 | g.chr13:99907463G>T  | Missense Mutation | GPR18     | p.L222M  | G protein-coupled receptor         | 19 (0.00)  | 26 (0.23)  | 0.62 |
| 11-01 | Gp4 | g.chr1:110201702A>T  | Silent            | GSTM4     | p.P179P  | glutathione S-transferase          | 90 (0.00)  | 38 (0.18)  | 0.49 |
| 11-01 | Gp4 | g.chr7:18555990G>A   | Intron            | HDAC9     |          | histone deacetylase 9              | 30 (0.03)  | 41 (0.15)  | 0.39 |
| 11-01 | Gp4 | g.chr12:112669383G>A | Missense Mutation | HECTD4    | p.S1899F | HECT domain containing protein     | 40 (0.00)  | 91 (0.11)  | 0.40 |
| 11-01 | Gp4 | g.chr6:52906014G>A   | Silent            | ICK       | p.I7I    | intestinal cell (MAK-lik)          | 31 (0.00)  | 32 (0.16)  | 0.42 |
| 11-01 | Gp4 | g.chr3:185410538G>C  | Missense Mutation | IGF2BP2   | p.T118R  | insulin-like growth factor         | 28 (0.00)  | 37 (0.19)  | 0.50 |
| 11-01 | Gp4 | g.chr17:39458232G>A  | Missense Mutation | KRTAP29-1 | p.T291I  | keratin associated protein         | 40 (0.00)  | 48 (0.15)  | 0.39 |
| 11-01 | Gp4 | g.chr6:129687459C>G  | Missense Mutation | LAMA2     | p.P1605A | laminin, alpha 2                   | 44 (0.00)  | 51 (0.16)  | 0.42 |
| 11-01 | Gp4 | g.chr19:54849792G>A  | Missense Mutation | LILRA4    | p.S77F   | leukocyte immunoglobulin           | 51 (0.00)  | 35 (0.14)  | 0.38 |
| 11-01 | Gp4 | g.chr10:72136265C>A  | Missense Mutation | LRRC20    | p.V9L    | leucine rich repeat containing     | 22 (0.00)  | 35 (0.14)  | 0.38 |
| 11-01 | Gp4 | g.chr17:17891346C>T  | Silent            | LRRC48    | p.S126S  | leucine rich repeat containing     | 18 (0.00)  | 17 (0.76)  | 0.91 |
| 11-01 | Gp4 | g.chr1:39901387G>A   | Missense Mutation | MACF1     | p.R5877H | microtubule-actin crosslinker      | 66 (0.00)  | 84 (0.18)  | 0.48 |
| 11-01 | Gp4 | g.chr7:78062752G>T   | Intron            | MAGI2     |          | membrane associated glycoprotein   | 22 (0.00)  | 33 (0.15)  | 0.40 |
| 11-01 | Gp4 | g.chr7:78535825C>A   | Intron            | MAGI2     |          | membrane associated glycoprotein   | 40 (0.00)  | 38 (0.16)  | 0.42 |
| 11-01 | Gp4 | g.chr7:78765854G>T   | Intron            | MAGI2     |          | membrane associated glycoprotein   | 51 (0.02)  | 62 (0.47)  | 1.25 |
| 11-01 | Gp4 | g.chr9:72724707C>T   | Silent            | MAMDC2    | p.T164T  | MAM domain containing protein      | 110 (0.01) | 101 (0.24) | 0.84 |
| 11-01 | Gp4 | g.chr5:71491739G>T   | Missense Mutation | MAP1B     | p.D853Y  | microtubule-associated protein     | 143 (0.01) | 146 (0.32) | 0.84 |
| 11-01 | Gp4 | g.chr15:90321352C>A  | Silent            | MESP2     | p.P327P  | mesoderm posterior basic helix     | 16 (0.00)  | 29 (0.17)  | 0.46 |
| 11-01 | Gp4 | g.chr16:14354909C>T  | Missense Mutation | MKL2      | p.P920S  | MKL/myocardin-like 2               | 39 (0.03)  | 63 (0.14)  | 0.38 |
| 11-01 | Gp4 | g.chr19:9060673C>T   | Missense Mutation | MUC16     | p.A8925T | mucin 16, cell surface associated  | 33 (0.00)  | 37 (0.16)  | 0.43 |
| 11-01 | Gp4 | g.chr1:24424468C>T   | Silent            | MYOM3     | p.V230V  | myomesin 3                         | 29 (0.00)  | 31 (0.16)  | 0.43 |
| 11-01 | Gp4 | g.chr4:120072127G>A  | Silent            | MYOZ2     | p.K59K   | myozenin 2                         | 17 (0.00)  | 23 (0.26)  | 0.70 |
| 11-01 | Gp4 | g.chr1:198231738G>T  | Missense Mutation | NEK7      | p.D78Y   | NIMA-related kinase 7              | 47 (0.00)  | 35 (0.20)  | 0.53 |
| 11-01 | Gp4 | g.chr7:139726085G>A  | Silent            | PARP12    | p.H564H  | poly (ADP-ribose) polymerase       | 125 (0.00) | 35 (0.14)  | 0.38 |

|       |     |                      |                   |            |          |                                      |           |      |
|-------|-----|----------------------|-------------------|------------|----------|--------------------------------------|-----------|------|
| 11-01 | Gp4 | g.chr6:137193355C>A  | Missense Mutation | PEX7       | p.S256Y  | peroxisomal biogenesis 85 (0.00)     | 54 (0.22) | 0.59 |
| 11-01 | Gp4 | g.chr18:10784822G>A  | Missense Mutation | PIEZO2     | p.L818F  | piezo-type mechanosens 24 (0.00)     | 49 (0.18) | 0.49 |
| 11-01 | Gp4 | g.chr10:3185635T>A   | Missense Mutation | PITRM1     | p.N864I  | pitrilysin metallopeptida 19 (0.00)  | 30 (0.20) | 0.53 |
| 11-01 | Gp4 | g.chr3:17052154C>T   | Missense Mutation | PLCL2      | p.S313L  | phospholipase C-like 2 56 (0.00)     | 83 (0.14) | 0.39 |
| 11-01 | Gp4 | g.chr1:12012679G>C   | Splice Site       | PLOD1      |          | procollagen-lysine, 2-ox 26 (0.00)   | 23 (0.22) | 0.58 |
| 11-01 | Gp4 | g.chr1:40557836C>G   | Missense Mutation | PPT1       | p.E81D   | palmitoyl-protein thioes 42 (0.00)   | 37 (0.16) | 0.43 |
| 11-01 | Gp4 | g.chr4:148591837C>A  | Silent            | PRMT10     | p.V267V  | 29 (0.00)                            | 35 (0.20) | 0.53 |
| 11-01 | Gp4 | g.chr10:89692079G>T  | Intron            | PTEN       |          | phosphatase and tensin I 16 (0.00)   | 11 (0.55) | 0.59 |
| 11-01 | Gp4 | g.chr22:36205898G>A  | Missense Mutation | RBFOX2     | p.L131F  | RNA binding protein, fc 30 (0.00)    | 48 (0.19) | 0.50 |
| 11-01 | Gp4 | g.chr22:24036099G>T  | Missense Mutation | RGL4       | p.D148Y  | ral guanine nucleotide d 22 (0.00)   | 35 (0.14) | 0.38 |
| 11-01 | Gp4 | g.chr19:49502617G>A  | Silent            | RUVBL2     | p.R18R   | RuvB-like AAA ATPase 23 (0.00)       | 43 (0.19) | 0.50 |
| 11-01 | Gp4 | g.chr7:45767903C>A   | RNA               | SEPT7P2    |          | septin 7 pseudogene 2 32 (0.00)      | 36 (0.22) | 0.59 |
| 11-01 | Gp4 | g.chr4:128688375G>A  | Splice Site       | SLC25A31   | p.K211K  | solute carrier family 25 26 (0.00)   | 37 (0.16) | 0.43 |
| 11-01 | Gp4 | g.chr16:24895379G>T  | Silent            | SLC5A11    | p.L197L  | solute carrier family 5 (s 27 (0.00) | 50 (0.16) | 0.43 |
| 11-01 | Gp4 | g.chr2:220466001C>T  | Missense Mutation | STK11IP    | p.P36S   | serine/threonine kinase 20 (0.00)    | 28 (0.18) | 0.48 |
| 11-01 | Gp4 | g.chrX:9673141T>A    | Missense Mutation | TBL1X      | p.F357Y  | transducin (beta)-like 1 19 (0.00)   | 34 (0.29) | 0.49 |
| 11-01 | Gp4 | g.chr1:155170314G>A  | Missense Mutation | THBS3      | p.P546S  | thrombospondin 3 22 (0.00)           | 29 (0.24) | 0.64 |
| 11-01 | Gp4 | g.chr14:24661933A>T  | Missense Mutation | TM9SF1     | p.D505E  | transmembrane 9 superf 37 (0.00)     | 34 (0.15) | 0.39 |
| 11-01 | Gp4 | g.chr17:3446767C>T   | Splice Site       | TRPV3      |          | transient receptor potent 45 (0.00)  | 71 (0.21) | 0.56 |
| 11-01 | Gp4 | g.chr11:5529969C>A   | Missense Mutation | UBQLN3     | p.G274C  | ubiquilin 3 49 (0.00)                | 31 (0.16) | 0.43 |
| 11-01 | Gp4 | g.chr3:183474459G>C  | Missense Mutation | YEATS2     | p.A512P  | YEATS domain contain 63 (0.00)       | 74 (0.18) | 0.47 |
| 11-01 | Gp4 | g.chr18:74587550G>A  | Missense Mutation | ZNF236     | p.C255Y  | zinc finger protein 236 18 (0.00)    | 27 (0.19) | 0.49 |
| 11-01 | Gp4 | g.chr19:21558102C>A  | Missense Mutation | ZNF738     | p.D53E   | zinc finger protein 738 19 (0.00)    | 51 (0.16) | 0.42 |
| 11-02 | Gp3 | g.chr9:107547909C>G  | Missense Mutation | ABCA1      | p.G2138A | ATP-binding cassette, s1 25 (0.00)   | 36 (0.19) | 0.52 |
| 11-02 | Gp3 | g.chr9:107549241C>T  | Missense Mutation | ABCA1      | p.G2074D | ATP-binding cassette, s1 23 (0.00)   | 21 (0.29) | 0.76 |
| 11-02 | Gp3 | g.chr16:2373655C>A   | Missense Mutation | ABCA3      | p.R161I  | ATP-binding cassette, s1 73 (0.00)   | 40 (0.25) | 0.67 |
| 11-02 | Gp3 | g.chr3:15176037G>T   | RNA               | AC090954.1 |          | 101 (0.00)                           | 42 (0.19) | 0.51 |
| 11-02 | Gp3 | g.chr12:112153761G>A | Silent            | ACAD10     | p.E329E  | acyl-CoA dehydrogenas 69 (0.01)      | 91 (0.22) | 0.59 |
| 11-02 | Gp3 | g.chr4:8394119G>T    | Missense Mutation | ACOX3      | p.T414N  | acyl-CoA oxidase 3, pri: 25 (0.00)   | 57 (0.18) | 0.47 |
| 11-02 | Gp3 | g.chr3:179294061C>G  | Missense Mutation | ACTL6A     | p.T178S  | actin-like 6A 26 (0.00)              | 24 (0.21) | 0.56 |
| 11-02 | Gp3 | g.chr4:100235236G>A  | Silent            | ADH1B      | p.V190V  | alcohol dehydrogenase 1 23 (0.00)    | 31 (0.16) | 0.43 |
| 11-02 | Gp3 | g.chr2:100194797G>A  | Silent            | AFF3       | p.F970F  | AF4/FMR2 family, men 41 (0.00)       | 45 (0.18) | 0.47 |
| 11-02 | Gp3 | g.chr11:62295179G>A  | Missense Mutation | AHNAK      | p.P2237L | AHNAK nucleoprotein 35 (0.00)        | 58 (0.31) | 0.83 |
| 11-02 | Gp3 | g.chr18:14183647G>A  | RNA               | ANKRD20A5P |          | ankyrin repeat domain 276 (0.00)     | 52 (0.21) | 0.56 |
| 11-02 | Gp3 | g.chr12:99223032G>T  | Missense Mutation | ANKS1B     | p.Q996K  | ankyrin repeat and steril 35 (0.00)  | 23 (0.22) | 0.58 |



|       |     |                      |                   |          |          |                                                          |           |      |
|-------|-----|----------------------|-------------------|----------|----------|----------------------------------------------------------|-----------|------|
| 11-02 | Gp3 | g.chr16:71807237G>A  | Nonsense Mutation | AP1G1    | p.Q119*  | adaptor-related protein c 18 (0.00)                      | 43 (0.28) | 0.74 |
| 11-02 | Gp3 | g.chr20:47648602C>A  | Missense Mutation | ARFGEF2  | p.L1694I | ADP-ribosylation factor 53 (0.00)                        | 48 (0.17) | 0.44 |
| 11-02 | Gp3 | g.chr10:99003832G>T  | Missense Mutation | ARHGAP19 | p.P360T  | Rho GTPase activating j21 (0.00)                         | 32 (0.16) | 0.42 |
| 11-02 | Gp3 | g.chr14:32561810G>A  | Silent            | ARHGAP5  | p.L645L  | Rho GTPase activating j47 (0.00)                         | 39 (0.15) | 0.41 |
| 11-02 | Gp3 | g.chr12:46231417C>T  | Silent            | ARID2    | p.L419L  | AT rich interactive dom 43 (0.02)                        | 28 (0.18) | 0.48 |
| 11-02 | Gp3 | g.chr1:197061161C>A  | Missense Mutation | ASPM     | p.R3107L | asp (abnormal spindle) l22 (0.00)                        | 20 (0.25) | 0.67 |
| 11-02 | Gp3 | g.chr1:197061162G>A  | Nonsense Mutation | ASPM     | p.R3107* | asp (abnormal spindle) l22 (0.00)                        | 20 (0.25) | 0.67 |
| 11-02 | Gp3 | g.chr9:133346888C>A  | Missense Mutation | ASS1     | p.L195M  | argininosuccinate synthase 18 (0.00)                     | 34 (0.15) | 0.39 |
| 11-02 | Gp3 | g.chr3:11340199C>T   | Silent            | ATG7     | p.L10L   | autophagy related 7 38 (0.00)                            | 57 (0.16) | 0.42 |
| 11-02 | Gp3 | g.chr13:113512162C>T | Missense Mutation | ATP11A   | p.H817Y  | ATPase, class VI, type 132 (0.00)                        | 31 (0.19) | 0.52 |
| 11-02 | Gp3 | g.chr3:194151847C>T  | Missense Mutation | ATP13A3  | p.D844N  | ATPase type 13A3 37 (0.00)                               | 29 (0.21) | 0.55 |
| 11-02 | Gp3 | g.chr1:160091037C>A  | Missense Mutation | ATP1A2   | p.S58Y   | ATPase, Na <sup>+</sup> /K <sup>+</sup> transp 57 (0.00) | 49 (0.14) | 0.38 |
| 11-02 | Gp3 | g.chr8:104078555C>T  | Silent            | ATP6V1C1 | p.G311G  | ATPase, H <sup>+</sup> transportin; 39 (0.00)            | 39 (0.15) | 0.41 |
| 11-02 | Gp3 | g.chr16:31122010C>A  | Splice Site       | BCKDK    | p.P215H  | branched chain ketoacid 21 (0.00)                        | 20 (0.25) | 0.67 |
| 11-02 | Gp3 | g.chr17:41202363T>C  | Intron            | BRCA1    |          | breast cancer 1, early on 32 (0.00)                      | 31 (0.16) | 0.43 |
| 11-02 | Gp3 | g.chr17:41242830C>G  | Intron            | BRCA1    |          | breast cancer 1, early on 25 (0.00)                      | 41 (0.15) | 0.39 |
| 11-02 | Gp3 | g.chr11:82645323C>A  | Silent            | C11orf82 | p.G981G  | 42 (0.00)                                                | 25 (0.20) | 0.53 |
| 11-02 | Gp3 | g.chr15:40628976G>A  | Missense Mutation | C15orf52 | p.L305F  | chromosome 15 open reading frame 18 (0.00)               | 31 (0.16) | 0.43 |
| 11-02 | Gp3 | g.chr9:117400911G>A  | Missense Mutation | C9orf91  | p.E252K  | chromosome 9 open reading frame 24 (0.00)                | 63 (0.16) | 0.42 |
| 11-02 | Gp3 | g.chr3:50471752C>T   | Missense Mutation | CACNA2D2 | p.A133T  | calcium channel, voltage-gated L-type 30 (0.00)          | 56 (0.14) | 0.38 |
| 11-02 | Gp3 | g.chr3:85064050G>A   | Intron            | CADM2    |          | cell adhesion molecule 254 (0.00)                        | 63 (0.25) | 0.68 |
| 11-02 | Gp3 | g.chr3:85201524C>T   | Intron            | CADM2    |          | cell adhesion molecule 269 (0.00)                        | 24 (0.21) | 0.56 |
| 11-02 | Gp3 | g.chr3:85201583G>A   | Intron            | CADM2    |          | cell adhesion molecule 249 (0.00)                        | 21 (0.29) | 0.76 |
| 11-02 | Gp3 | g.chr3:85434353G>A   | Intron            | CADM2    |          | cell adhesion molecule 224 (0.00)                        | 32 (0.16) | 0.42 |
| 11-02 | Gp3 | g.chr3:86026961G>T   | Intron            | CADM2    |          | cell adhesion molecule 240 (0.00)                        | 30 (0.17) | 0.44 |
| 11-02 | Gp3 | g.chr7:134635213C>A  | Nonsense Mutation | CALD1    | p.S628*  | caldesmon 1 39 (0.00)                                    | 31 (0.16) | 0.43 |
| 11-02 | Gp3 | g.chr17:38324611C>A  | Missense Mutation | CASC3    | p.P636T  | cancer susceptibility protein 17 (0.00)                  | 25 (0.24) | 0.64 |
| 11-02 | Gp3 | g.chr2:132289275G>A  | Missense Mutation | CCDC74A  | p.D195N  | coiled-coil domain containing 19 (0.00)                  | 35 (0.14) | 0.38 |
| 11-02 | Gp3 | g.chr16:68712172C>A  | Missense Mutation | CDH3     | p.L128M  | cadherin 3, type 1, P-cadherin 29 (0.00)                 | 41 (0.15) | 0.39 |
| 11-02 | Gp3 | g.chr8:61761617G>A   | Missense Mutation | CHD7     | p.D1770N | chromodomain helicase domain protein 7 113 (0.00)        | 86 (0.17) | 0.47 |
| 11-02 | Gp3 | g.chr14:21868443C>T  | Missense Mutation | CHD8     | p.G1532R | chromodomain helicase domain protein 8 62 (0.00)         | 34 (0.15) | 0.39 |
| 11-02 | Gp3 | g.chr15:20489547C>T  | RNA               | CHEK2P2  |          | checkpoint kinase 2 pseudogene 83 (0.00)                 | 69 (0.14) | 0.39 |
| 11-02 | Gp3 | g.chr12:10051545C>A  | Missense Mutation | CLEC2A   | p.W147C  | C-type lectin domain family 25 (0.00)                    | 23 (0.22) | 0.58 |
| 11-02 | Gp3 | g.chr12:8618095C>T   | Missense Mutation | CLEC6A   | p.P80L   | C-type lectin domain family 27 (0.00)                    | 34 (0.18) | 0.47 |
| 11-02 | Gp3 | g.chr14:92627592T>A  | Splice Site       | CPSF2    |          | cleavage and polyadenylation factor 40 (0.00)            | 44 (0.25) | 0.67 |

|       |     |                      |                   |             |          |                           |            |           |      |
|-------|-----|----------------------|-------------------|-------------|----------|---------------------------|------------|-----------|------|
| 11-02 | Gp3 | g.chr11:61178521C>T  | Missense Mutation | CPSF7       | p.R428K  | cleavage and polyadeny    | 17 (0.00)  | 11 (0.45) | 1.21 |
| 11-02 | Gp3 | g.chr7:29135764G>A   | Missense Mutation | CPVL        | p.L120F  | carboxypeptidase, vitell  | 30 (0.00)  | 64 (0.34) | 0.92 |
| 11-02 | Gp3 | g.chr7:143882664G>T  | Missense Mutation | CTAGE4      | p.G690C  | CTAGE family, membe       | 40 (0.00)  | 25 (0.36) | 0.96 |
| 11-02 | Gp3 | g.chr6:132030116G>A  | Missense Mutation | CTAGE9      | p.S681F  | CTAGE family, membe       | 34 (0.00)  | 32 (0.16) | 0.42 |
| 11-02 | Gp3 | g.chr6:132030126G>A  | Missense Mutation | CTAGE9      | p.P678S  | CTAGE family, membe       | 33 (0.00)  | 35 (0.23) | 0.61 |
| 11-02 | Gp3 | g.chr19:7521218C>A   | Silent            | CTD-2207O23 | p.S473S  |                           | 32 (0.00)  | 41 (0.20) | 0.52 |
| 11-02 | Gp3 | g.chr10:96827346C>A  | Nonsense Mutation | CYP2C8      | p.G91*   | cytochrome P450, famil    | 39 (0.00)  | 24 (0.25) | 0.67 |
| 11-02 | Gp3 | g.chr9:124411628C>G  | Intron            | DAB2IP      |          | DAB2 interacting protei   | 19 (0.00)  | 56 (0.18) | 0.48 |
| 11-02 | Gp3 | g.chr9:124473685G>A  | Intron            | DAB2IP      |          | DAB2 interacting protei   | 20 (0.00)  | 29 (0.21) | 0.55 |
| 11-02 | Gp3 | g.chr11:6654767G>A   | Silent            | DCHS1       | p.D777D  | dachsous cadherin-relat   | 15 (0.00)  | 32 (0.19) | 0.50 |
| 11-02 | Gp3 | g.chr11:6654818G>A   | Silent            | DCHS1       | p.I760I  | dachsous cadherin-relat   | 15 (0.00)  | 29 (0.17) | 0.46 |
| 11-02 | Gp3 | g.chr2:118583888G>A  | Missense Mutation | DDX18       | p.G522E  | DEAD (Asp-Glu-Ala-A       | 29 (0.00)  | 26 (0.19) | 0.51 |
| 11-02 | Gp3 | g.chr20:37632550G>A  | Splice Site       | DHX35       | p.K337K  | DEAH (Asp-Glu-Ala-H       | 27 (0.00)  | 32 (0.16) | 0.42 |
| 11-02 | Gp3 | g.chr16:72142714G>A  | Missense Mutation | DHX38       | p.V1091M | DEAH (Asp-Glu-Ala-H       | 15 (0.00)  | 24 (0.21) | 0.56 |
| 11-02 | Gp3 | g.chr7:107557806G>A  | Missense Mutation | DLD         | p.G379S  | dihydrolipoamide dehyd    | 26 (0.00)  | 29 (0.28) | 0.74 |
| 11-02 | Gp3 | g.chr18:3567547C>A   | Silent            | DLGAP1      | p.G666G  | discs, large (Drosophila) | 32 (0.00)  | 21 (0.24) | 0.63 |
| 11-02 | Gp3 | g.chr9:34997062G>A   | Missense Mutation | DNAJB5      | p.G285S  | DnaJ (Hsp40) homolog,     | 21 (0.00)  | 41 (0.15) | 0.39 |
| 11-02 | Gp3 | g.chr2:207558036C>T  | Missense Mutation | DYTN        | p.M281I  | dystrotelin               | 26 (0.00)  | 20 (0.25) | 0.67 |
| 11-02 | Gp3 | g.chr11:85975301G>A  | Missense Mutation | EED         | p.S241N  | embryonic ectoderm dev    | 43 (0.00)  | 56 (0.16) | 0.43 |
| 11-02 | Gp3 | g.chr8:132997280C>A  | Silent            | EFR3A       | p.V614V  | EFR3 homolog A (S. ce     | 42 (0.00)  | 31 (0.16) | 0.43 |
| 11-02 | Gp3 | g.chr3:150280354A>G  | Missense Mutation | EIF2A       | p.K42E   | eukaryotic translation in | 33 (0.00)  | 13 (0.38) | 1.03 |
| 11-02 | Gp3 | g.chr7:37382280C>A   | Silent            | ELMO1       | p.A5A    | engulfment and cell mot   | 37 (0.00)  | 39 (0.23) | 0.62 |
| 11-02 | Gp3 | g.chr21:39761098G>A  | Intron            | ERG         |          | v-ets avian erythroblast  | 34 (0.00)  | 47 (0.30) | 0.79 |
| 11-02 | Gp3 | g.chr21:39797584G>A  | Intron            | ERG         |          | v-ets avian erythroblast  | 22 (0.00)  | 43 (0.35) | 0.93 |
| 11-02 | Gp3 | g.chr21:39847761C>T  | Intron            | ERG         |          | v-ets avian erythroblast  | 23 (0.00)  | 28 (0.21) | 0.57 |
| 11-02 | Gp3 | g.chr21:39861648G>A  | Intron            | ERG         |          | v-ets avian erythroblast  | 50 (0.00)  | 34 (0.15) | 0.39 |
| 11-02 | Gp3 | g.chr1:169499024G>A  | Silent            | F5          | p.P1747P | coagulation factor V (pr  | 48 (0.00)  | 47 (0.15) | 0.40 |
| 11-02 | Gp3 | g.chr15:80467408C>T  | Silent            | FAH         | p.D296D  | fumarylacetoacetate hyd   | 30 (0.00)  | 38 (0.16) | 0.42 |
| 11-02 | Gp3 | g.chr15:102496011G>A | lincRNA           | FAM138E     |          | family with sequence sim  | 49 (0.00)  | 31 (0.29) | 0.77 |
| 11-02 | Gp3 | g.chr1:78267141G>A   | Nonsense Mutation | FAM73A      | p.W107*  | family with sequence sim  | 57 (0.00)  | 28 (0.32) | 0.86 |
| 11-02 | Gp3 | g.chr4:187541415C>A  | Missense Mutation | FAT1        | p.D2109Y | FAT atypical cadherin     | 134 (0.00) | 33 (0.15) | 0.40 |
| 11-02 | Gp3 | g.chr17:18673336G>A  | Missense Mutation | FBXW10      | p.M648I  | F-box and WD repeat do    | 59 (0.00)  | 42 (0.19) | 0.51 |
| 11-02 | Gp3 | g.chr16:67271994C>A  | Silent            | FHOD1       | p.L195L  | formin homology 2 dom     | 25 (0.00)  | 34 (0.18) | 0.47 |
| 11-02 | Gp3 | g.chr17:80684378G>T  | Missense Mutation | FN3KRP      | p.W164L  | fructosamine 3 kinase re  | 17 (0.00)  | 33 (0.18) | 0.48 |
| 11-02 | Gp3 | g.chr17:80684773G>T  | Missense Mutation | FN3KRP      | p.W219L  | fructosamine 3 kinase re  | 26 (0.00)  | 46 (0.15) | 0.41 |

|       |     |                      |                   |         |          |                                      |           |      |
|-------|-----|----------------------|-------------------|---------|----------|--------------------------------------|-----------|------|
| 11-02 | Gp3 | g.chr9:132740816G>A  | Silent            | FNBP1   | p.S91S   | formin binding protein 143 (0.00)    | 31 (0.23) | 0.60 |
| 11-02 | Gp3 | g.chr4:159780261G>T  | Missense Mutation | FNIP2   | p.A304S  | folliculin interacting pro 16 (0.00) | 20 (0.25) | 0.67 |
| 11-02 | Gp3 | g.chr9:20944665C>A   | Silent            | FOCAD   | p.L1149L | focadhesin 45 (0.00)                 | 37 (0.16) | 0.43 |
| 11-02 | Gp3 | g.chr3:197497070G>A  | Missense Mutation | FYTTD1  | p.R84K   | forty-two-three domain 16 (0.00)     | 31 (0.23) | 0.60 |
| 11-02 | Gp3 | g.chr9:74817504G>T   | Missense Mutation | GDA     | p.G77V   | guanine deaminase 64 (0.00)          | 41 (0.15) | 0.39 |
| 11-02 | Gp3 | g.chr3:150917079C>A  | Missense Mutation | GPR171  | p.S32I   | G protein-coupled recep 17 (0.00)    | 17 (0.41) | 1.10 |
| 11-02 | Gp3 | g.chr17:36484929G>A  | Missense Mutation | GPR179  | p.A1508V | G protein-coupled recep 17 (0.00)    | 27 (0.22) | 0.59 |
| 11-02 | Gp3 | g.chr2:11738007T>A   | Missense Mutation | GREB1   | p.N685K  | growth regulation by est 31 (0.00)   | 45 (0.16) | 0.41 |
| 11-02 | Gp3 | g.chrX:122561882G>A  | Silent            | GRIA3   | p.L656L  | glutamate receptor, iono 44 (0.00)   | 26 (0.23) | 0.38 |
| 11-02 | Gp3 | g.chr5:21459846G>T   | RNA               | GUSBP1  |          | glucuronidase, beta pset 18 (0.00)   | 32 (0.16) | 0.42 |
| 11-02 | Gp3 | g.chr7:18562979G>A   | Intron            | HDAC9   |          | histone deacetylase 9 77 (0.00)      | 44 (0.16) | 0.42 |
| 11-02 | Gp3 | g.chr7:18829212C>T   | Intron            | HDAC9   |          | histone deacetylase 9 39 (0.00)      | 37 (0.19) | 0.50 |
| 11-02 | Gp3 | g.chr7:18870232A>T   | Intron            | HDAC9   |          | histone deacetylase 9 35 (0.00)      | 33 (0.15) | 0.40 |
| 11-02 | Gp3 | g.chr11:63327562G>A  | Missense Mutation | HRASLS2 | p.P38L   | HRAS-like suppressor 220 (0.00)      | 31 (0.26) | 0.69 |
| 11-02 | Gp3 | g.chr5:118835205G>A  | Missense Mutation | HSD17B4 | p.G371E  | hydroxysteroid (17-beta 48 (0.00)    | 30 (0.20) | 0.53 |
| 11-02 | Gp3 | g.chr8:39785371G>A   | Silent            | IDO1    | p.Q293Q  | indoleamine 2,3-dioxyg 54 (0.00)     | 68 (0.16) | 0.43 |
| 11-02 | Gp3 | g.chr10:91144424G>A  | Missense Mutation | IFIT1B  | p.E452K  | interferon-induced prote 47 (0.00)   | 32 (0.19) | 0.50 |
| 11-02 | Gp3 | g.chr14:106236007G>A | RNA               | IGHG3   |          | immunoglobulin heavy 34 (0.00)       | 63 (0.14) | 0.38 |
| 11-02 | Gp3 | g.chr2:89278504G>T   | RNA               | IGKV3-7 |          | immunoglobulin kappa 51 (0.02)       | 62 (0.16) | 0.43 |
| 11-02 | Gp3 | g.chr5:55195961G>A   | Splice Site       | IL31RA  |          | interleukin 31 receptor 34 (0.00)    | 28 (0.18) | 0.48 |
| 11-02 | Gp3 | g.chr4:142984490A>T  | Intron            | INPP4B  |          | inositol polyphosphate- 61 (0.00)    | 37 (0.16) | 0.43 |
| 11-02 | Gp3 | g.chr4:143105810C>T  | Intron            | INPP4B  |          | inositol polyphosphate- 96 (0.00)    | 60 (0.17) | 0.44 |
| 11-02 | Gp3 | g.chr4:143350126G>A  | Intron            | INPP4B  |          | inositol polyphosphate- 38 (0.00)    | 33 (0.15) | 0.40 |
| 11-02 | Gp3 | g.chr4:143476258T>A  | Intron            | INPP4B  |          | inositol polyphosphate- 60 (0.00)    | 77 (0.16) | 0.42 |
| 11-02 | Gp3 | g.chr4:143645053C>T  | Intron            | INPP4B  |          | inositol polyphosphate- 74 (0.00)    | 49 (0.24) | 0.65 |
| 11-02 | Gp3 | g.chr4:143707350G>A  | Intron            | INPP4B  |          | inositol polyphosphate- 34 (0.00)    | 27 (0.19) | 0.49 |
| 11-02 | Gp3 | g.chr4:143750196G>A  | Intron            | INPP4B  |          | inositol polyphosphate- 34 (0.00)    | 47 (0.15) | 0.40 |
| 11-02 | Gp3 | g.chr3:197665627C>T  | Missense Mutation | IQCG    | p.G103R  | IQ motif containing G 72 (0.00)      | 40 (0.15) | 0.40 |
| 11-02 | Gp3 | g.chr17:3626649C>G   | Missense Mutation | ITGAE   | p.C1057S | integrin, alpha E (antige 31 (0.00)  | 32 (0.16) | 0.42 |
| 11-02 | Gp3 | g.chr21:35183527G>T  | Splice Site       | ITSN1   |          | intersectin 1 (SH3 doma 24 (0.00)    | 43 (0.19) | 0.50 |
| 11-02 | Gp3 | g.chr1:111144668C>T  | Missense Mutation | KCNA2   | p.G340D  | potassium voltage-gated 45 (0.00)    | 32 (0.34) | 0.92 |
| 11-02 | Gp3 | g.chr7:150649858G>A  | Silent            | KCNH2   | p.S404S  | potassium voltage-gated 18 (0.00)    | 27 (0.19) | 0.49 |
| 11-02 | Gp3 | g.chr6:39163723C>T   | Missense Mutation | KCNK5   | p.G76E   | potassium channel, subf 30 (0.00)    | 48 (0.15) | 0.39 |
| 11-02 | Gp3 | g.chr19:18100549C>A  | Missense Mutation | KCNN1   | p.L399I  | potassium intermediate/ 59 (0.00)    | 38 (0.24) | 0.63 |
| 11-02 | Gp3 | g.chr5:113740304C>A  | Missense Mutation | KCNN2   | p.T251N  | potassium intermediate/ 49 (0.00)    | 18 (0.33) | 0.89 |

|       |     |                     |                   |           |          |                           |            |            |      |
|-------|-----|---------------------|-------------------|-----------|----------|---------------------------|------------|------------|------|
| 11-02 | Gp3 | g.chr19:10597371T>A | Missense Mutation | KEAP1     | p.E611V  | kelch-like ECH-associat   | 19 (0.00)  | 35 (0.17)  | 0.46 |
| 11-02 | Gp3 | g.chr9:5747316G>T   | Missense Mutation | KIAA1432  | p.Q421H  |                           | 25 (0.00)  | 27 (0.19)  | 0.49 |
| 11-02 | Gp3 | g.chr1:200965334T>A | Missense Mutation | KIF21B    | p.K756M  | kinesin family member     | 42 (0.00)  | 53 (0.15)  | 0.40 |
| 11-02 | Gp3 | g.chr8:145694113C>T | Missense Mutation | KIFC2     | p.R337W  | kinesin family member     | 29 (0.00)  | 72 (0.19)  | 0.52 |
| 11-02 | Gp3 | g.chr19:55263121G>A | Missense Mutation | KIR2DL3   | p.V246I  | killer cell immunoglobu   | 65 (0.00)  | 84 (0.14)  | 0.38 |
| 11-02 | Gp3 | g.chr12:49446756C>T | Missense Mutation | KMT2D     | p.A352T  | lysine (K)-specific meth  | 27 (0.00)  | 34 (0.18)  | 0.47 |
| 11-02 | Gp3 | g.chr17:38928013C>T | Nonsense Mutation | KRT26     | p.W118*  | keratin 26                | 26 (0.00)  | 22 (0.23)  | 0.61 |
| 11-02 | Gp3 | g.chr17:39551546C>T | Missense Mutation | KRT31     | p.R276K  | keratin 31                | 20 (0.00)  | 30 (0.23)  | 0.62 |
| 11-02 | Gp3 | g.chr11:18421069G>A | Missense Mutation | LDHA      | p.R73K   | lactate dehydrogenase A   | 28 (0.00)  | 26 (0.23)  | 0.62 |
| 11-02 | Gp3 | g.chr19:54662181G>A | Missense Mutation | LENG1     | p.R51W   | leukocyte receptor clust  | 30 (0.00)  | 35 (0.14)  | 0.38 |
| 11-02 | Gp3 | g.chr8:29961891G>A  | Silent            | LEPROTL1  | p.V56V   | leptin receptor overlapp  | 25 (0.00)  | 34 (0.15)  | 0.39 |
| 11-02 | Gp3 | g.chr1:152629142C>T | lincRNA           | LINC00302 |          | long intergenic non-prot  | 56 (0.00)  | 36 (0.17)  | 0.44 |
| 11-02 | Gp3 | g.chr5:176778242G>A | Missense Mutation | LMAN2     | p.L83F   | lectin, mannose-binding   | 21 (0.00)  | 46 (0.15)  | 0.41 |
| 11-02 | Gp3 | g.chr2:74777459G>A  | Silent            | LOXL3     | p.D110D  | lysyl oxidase-like 3      | 24 (0.00)  | 31 (0.19)  | 0.52 |
| 11-02 | Gp3 | g.chr1:82456442G>A  | Silent            | LPHN2     | p.R1331R | latrophilin 2             | 15 (0.00)  | 21 (0.38)  | 1.02 |
| 11-02 | Gp3 | g.chr2:11922535C>T  | Missense Mutation | LPIN1     | p.A83V   | lipin 1                   | 30 (0.00)  | 33 (0.21)  | 0.57 |
| 11-02 | Gp3 | g.chr14:42356592C>A | Missense Mutation | LRFN5     | p.S255Y  | leucine rich repeat and f | 33 (0.00)  | 40 (0.17)  | 0.47 |
| 11-02 | Gp3 | g.chr1:90179101G>A  | Silent            | LRRC8C    | p.L324L  | leucine rich repeat conta | 47 (0.00)  | 36 (0.22)  | 0.59 |
| 11-02 | Gp3 | g.chr2:33505147C>T  | Nonsense Mutation | LTBP1     | p.Q633*  | latent transforming grow  | 27 (0.00)  | 33 (0.15)  | 0.40 |
| 11-02 | Gp3 | g.chr7:20199560C>A  | Nonsense Mutation | MACC1     | p.E142*  | metastasis associated in  | 22 (0.00)  | 21 (0.24)  | 0.63 |
| 11-02 | Gp3 | g.chr7:78023711G>A  | Intron            | MAGI2     |          | membrane associated gu    | 20 (0.00)  | 18 (0.28)  | 0.74 |
| 11-02 | Gp3 | g.chr7:78095328C>T  | Intron            | MAGI2     |          | membrane associated gu    | 38 (0.00)  | 24 (0.21)  | 0.56 |
| 11-02 | Gp3 | g.chr7:78121589G>A  | Intron            | MAGI2     |          | membrane associated gu    | 25 (0.00)  | 13 (0.46)  | 1.23 |
| 11-02 | Gp3 | g.chr7:78272269G>T  | Intron            | MAGI2     |          | membrane associated gu    | 64 (0.00)  | 59 (0.15)  | 0.41 |
| 11-02 | Gp3 | g.chr7:78400587A>T  | Intron            | MAGI2     |          | membrane associated gu    | 43 (0.00)  | 36 (0.17)  | 0.44 |
| 11-02 | Gp3 | g.chr7:78543236C>T  | Intron            | MAGI2     |          | membrane associated gu    | 58 (0.02)  | 69 (0.16)  | 0.43 |
| 11-02 | Gp3 | g.chr7:79041039T>A  | Intron            | MAGI2     |          | membrane associated gu    | 53 (0.00)  | 33 (0.15)  | 0.40 |
| 11-02 | Gp3 | g.chr7:79068478C>T  | Intron            | MAGI2     |          | membrane associated gu    | 228 (0.00) | 213 (0.19) | 0.51 |
| 11-02 | Gp3 | g.chr15:43816562G>A | Missense Mutation | MAP1A     | p.S1202N | microtubule-associated j  | 18 (0.00)  | 26 (0.23)  | 0.62 |
| 11-02 | Gp3 | g.chr6:84056051G>T  | Silent            | ME1       | p.A147A  | malic enzyme 1, NADP      | 32 (0.00)  | 35 (0.14)  | 0.38 |
| 11-02 | Gp3 | g.chr1:40432278G>A  | Silent            | MFSD2A    | p.K240K  | major facilitator superfa | 25 (0.00)  | 43 (0.16)  | 0.43 |
| 11-02 | Gp3 | g.chr22:18379546G>A | Missense Mutation | MICAL3    | p.R384W  | microtubule associated    | 144 (0.00) | 51 (0.18)  | 0.47 |
| 11-02 | Gp3 | g.chr6:168312017C>T | Missense Mutation | MLLT4     | p.H629Y  | myeloid/lymphoid or mi    | 42 (0.00)  | 59 (0.15)  | 0.41 |
| 11-02 | Gp3 | g.chr20:49576537G>A | Silent            | MOCS3     | p.L386L  | molybdenum cofactor sy    | 28 (0.00)  | 33 (0.18)  | 0.48 |
| 11-02 | Gp3 | g.chr8:142470106G>A | RNA               | MROH5     |          | maestro heat-like repeat  | 17 (0.00)  | 44 (0.16)  | 0.42 |

|       |     |                     |                   |         |           |                                                                              |            |      |
|-------|-----|---------------------|-------------------|---------|-----------|------------------------------------------------------------------------------|------------|------|
| 11-02 | Gp3 | g.chr20:35742515G>T | Missense Mutation | MROH8   | p.L857I   | maestro heat-like repeat 18 (0.00)                                           | 33 (0.18)  | 0.48 |
| 11-02 | Gp3 | g.chr20:35783475G>T | Silent            | MROH8   | p.L355L   | maestro heat-like repeat 30 (0.00)                                           | 29 (0.17)  | 0.46 |
| 11-02 | Gp3 | g.chr3:15091402C>A  | Missense Mutation | MRPS25  | p.V124L   | mitochondrial ribosomal 21 (0.00)                                            | 22 (0.27)  | 0.73 |
| 11-02 | Gp3 | g.chr11:60476230C>A | Missense Mutation | MS4A8   | p.D170E   | membrane-spanning 4-d 18 (0.00)                                              | 27 (0.19)  | 0.49 |
| 11-02 | Gp3 | g.chr19:8996394C>A  | Missense Mutation | MUC16   | p.E13726D | mucin 16, cell surface a:39 (0.00)                                           | 41 (0.15)  | 0.39 |
| 11-02 | Gp3 | g.chr19:9028308G>A  | Silent            | MUC16   | p.L12162L | mucin 16, cell surface a:46 (0.00)                                           | 68 (0.15)  | 0.39 |
| 11-02 | Gp3 | g.chr19:9046853G>A  | Missense Mutation | MUC16   | p.P11593L | mucin 16, cell surface a:40 (0.00)                                           | 49 (0.14)  | 0.38 |
| 11-02 | Gp3 | g.chr19:9065652G>T  | Missense Mutation | MUC16   | p.A7265D  | mucin 16, cell surface a:27 (0.00)                                           | 39 (0.18)  | 0.48 |
| 11-02 | Gp3 | g.chr19:9076570C>T  | Missense Mutation | MUC16   | p.D3626N  | mucin 16, cell surface a:21 (0.00)                                           | 31 (0.19)  | 0.52 |
| 11-02 | Gp3 | g.chr6:153043034C>T | Silent            | MYCT1   | p.H118H   | myc target 1 39 (0.00)                                                       | 28 (0.18)  | 0.48 |
| 11-02 | Gp3 | g.chr17:10265687C>A | Missense Mutation | MYH13   | p.W113L   | myosin, heavy chain 13, 71 (0.01)                                            | 42 (0.31)  | 0.83 |
| 11-02 | Gp3 | g.chr12:56553842G>A | Missense Mutation | MYL6    | p.E87K    | myosin, light chain 6, al21 (0.00)                                           | 23 (0.26)  | 0.70 |
| 11-02 | Gp3 | g.chr7:105909003C>A | Missense Mutation | NAMPT   | p.G217V   | nicotinamide phosphoril 66 (0.00)                                            | 54 (0.15)  | 0.40 |
| 11-02 | Gp3 | g.chr1:148251892C>T | Missense Mutation | NBPF20  | p.V4617I  | neuroblastoma breakpoint 139 (0.01)                                          | 85 (0.15)  | 0.41 |
| 11-02 | Gp3 | g.chr6:126176366T>A | Missense Mutation | NCOA7   | p.L84Q    | nuclear receptor coactivator 23 (0.00)                                       | 22 (0.23)  | 0.61 |
| 11-02 | Gp3 | g.chr18:70451069C>A | Missense Mutation | NETO1   | p.D238Y   | neuropilin (NRP) and to 72 (0.00)                                            | 52 (0.15)  | 0.41 |
| 11-02 | Gp3 | g.chr8:63492200G>A  | Missense Mutation | NKAIN3  | p.G53R    | Na <sup>+</sup> /K <sup>+</sup> transporting ATPase 42 (0.00)                | 27 (0.19)  | 0.49 |
| 11-02 | Gp3 | g.chr10:96121516C>T | Silent            | NOC3L   | p.K41K    | nucleolar complex associated 37 (0.00)                                       | 25 (0.20)  | 0.53 |
| 11-02 | Gp3 | g.chr2:50692676C>A  | Missense Mutation | NRXN1   | p.D1130Y  | neurexin 1 19 (0.00)                                                         | 32 (0.16)  | 0.42 |
| 11-02 | Gp3 | g.chr5:102894792G>A | Missense Mutation | NUDT12  | p.T177I   | nudix (nucleoside diphosphate) 39 (0.00)                                     | 32 (0.16)  | 0.42 |
| 11-02 | Gp3 | g.chr19:17338655C>T | Silent            | OCEL1   | p.Y153Y   | occludin/ELL domain containing 19 (0.00)                                     | 33 (0.18)  | 0.48 |
| 11-02 | Gp3 | g.chr16:56500879G>A | Splice Site       | OGFOD1  | p.Q219Q   | 2-oxoglutarate and iron-dependent 25 (0.00)                                  | 32 (0.22)  | 0.58 |
| 11-02 | Gp3 | g.chr9:125437502C>G | Missense Mutation | OR1L3   | p.L32V    | olfactory receptor, family 29 (0.00)                                         | 33 (0.15)  | 0.40 |
| 11-02 | Gp3 | g.chr11:4842738C>T  | Silent            | OR51F2  | p.I41I    | olfactory receptor, family 77 (0.01)                                         | 119 (0.16) | 0.43 |
| 11-02 | Gp3 | g.chr11:56143248G>A | Missense Mutation | OR8U1   | p.R50K    | olfactory receptor, family 73 (0.00)                                         | 48 (0.15)  | 0.39 |
| 11-02 | Gp3 | g.chr12:80732975C>T | Missense Mutation | OTOGL   | p.L1640F  | otogelin-like 49 (0.00)                                                      | 48 (0.31)  | 0.83 |
| 11-02 | Gp3 | g.chr12:47629953C>T | Silent            | PCED1B  | p.V369V   | PC-esterase domain containing 42 (0.02)                                      | 34 (0.18)  | 0.47 |
| 11-02 | Gp3 | g.chr18:60505218G>A | Intron            | PHLPP1  |           | PH domain and leucine-rich 27 (0.00)                                         | 34 (0.15)  | 0.39 |
| 11-02 | Gp3 | g.chr18:60580385C>A | Intron            | PHLPP1  |           | PH domain and leucine-rich 15 (0.00)                                         | 12 (0.42)  | 1.11 |
| 11-02 | Gp3 | g.chr18:60606903T>C | Intron            | PHLPP1  |           | PH domain and leucine-rich 57 (0.00)                                         | 32 (0.19)  | 0.50 |
| 11-02 | Gp3 | g.chr1:204438288C>T | Missense Mutation | PIK3C2B | p.G215R   | phosphatidylinositol-4-phosphate 16 (0.00)                                   | 21 (0.33)  | 0.89 |
| 11-02 | Gp3 | g.chr1:204438350A>T | Nonsense Mutation | PIK3C2B | p.L194*   | phosphatidylinositol-4-phosphate 16 (0.00)                                   | 25 (0.24)  | 0.64 |
| 11-02 | Gp3 | g.chr11:7660963G>A  | Splice Site       | PPFIBP2 | p.D270N   | PTPRF interacting protein 88 (0.00)                                          | 107 (0.16) | 0.42 |
| 11-02 | Gp3 | g.chr11:7660994C>A  | Missense Mutation | PPFIBP2 | p.P280H   | PTPRF interacting protein 74 (0.00)                                          | 89 (0.16)  | 0.42 |
| 11-02 | Gp3 | g.chr14:60749752C>T | Missense Mutation | PPM1A   | p.H111Y   | protein phosphatase, Mg <sup>2+</sup> /Mn <sup>2+</sup> -dependent 27 (0.00) | 20 (0.30)  | 0.80 |

|       |     |                      |                   |               |          |                            |            |            |      |
|-------|-----|----------------------|-------------------|---------------|----------|----------------------------|------------|------------|------|
| 11-02 | Gp3 | g.chr21:43248594C>A  | Missense Mutation | PRDM15        | p.A525S  | PR domain containing 1     | 16 (0.00)  | 50 (0.16)  | 0.43 |
| 11-02 | Gp3 | g.chr14:61924348C>G  | Missense Mutation | PRKCH         | p.A410G  | protein kinase C, eta      | 42 (0.00)  | 46 (0.24)  | 0.64 |
| 11-02 | Gp3 | g.chr14:61924365C>T  | Missense Mutation | PRKCH         | p.L416F  | protein kinase C, eta      | 45 (0.00)  | 46 (0.22)  | 0.58 |
| 11-02 | Gp3 | g.chr1:151006333G>A  | Missense Mutation | PRUNE         | p.A329T  | prune exopolyphosphata     | 29 (0.00)  | 46 (0.17)  | 0.46 |
| 11-02 | Gp3 | g.chr6:47847475G>A   | Nonsense Mutation | PTCHD4        | p.Q369*  | patched domain containi    | 45 (0.02)  | 43 (0.16)  | 0.43 |
| 11-02 | Gp3 | g.chr4:87643569G>A   | Missense Mutation | PTPN13        | p.M530I  | protein tyrosine phosph    | 49 (0.00)  | 39 (0.18)  | 0.48 |
| 11-02 | Gp3 | g.chr15:75766088G>A  | Missense Mutation | PTPN9         | p.R384C  | protein tyrosine phosph    | 32 (0.00)  | 63 (0.14)  | 0.38 |
| 11-02 | Gp3 | g.chr12:110960177C>A | Missense Mutation | RAD9B         | p.S293R  | RAD9 homolog B (S. p       | 30 (0.00)  | 12 (0.50)  | 1.33 |
| 11-02 | Gp3 | g.chr2:109382915G>A  | Missense Mutation | RANBP2        | p.A1974T | RAN binding protein 2      | 102 (0.00) | 161 (0.17) | 0.46 |
| 11-02 | Gp3 | g.chr12:53609467C>G  | Missense Mutation | RARG          | p.G99A   | retinoic acid receptor, g  | 29 (0.00)  | 31 (0.19)  | 0.52 |
| 11-02 | Gp3 | g.chr21:15599412C>A  | Nonsense Mutation | RBM11         | p.S215*  | RNA binding motif prot     | 28 (0.00)  | 32 (0.16)  | 0.42 |
| 11-02 | Gp3 | g.chr5:145641127G>T  | Nonsense Mutation | RBM27         | p.E650*  | RNA binding motif prot     | 17 (0.00)  | 23 (0.22)  | 0.58 |
| 11-02 | Gp3 | g.chr13:34404969G>A  | Missense Mutation | RFC3          | p.M229I  | replication factor C (acti | 16 (0.00)  | 14 (0.36)  | 0.95 |
| 11-02 | Gp3 | g.chr2:107041629T>C  | Missense Mutation | RGPD3         | p.N932D  | RANBP2-like and GRII       | 37 (0.00)  | 22 (0.23)  | 0.61 |
| 11-02 | Gp3 | g.chr6:73110228G>T   | Missense Mutation | RIMS1         | p.D158Y  | regulating synaptic men    | 64 (0.00)  | 33 (0.18)  | 0.48 |
| 11-02 | Gp3 | g.chr2:86831259C>A   | Nonsense Mutation | RNF103        | p.E589*  | ring finger protein 103    | 61 (0.00)  | 43 (0.16)  | 0.43 |
| 11-02 | Gp3 | g.chr17:41321096C>T  | lincRNA           | RP11-242D8.1  |          |                            | 51 (0.02)  | 39 (0.15)  | 0.41 |
| 11-02 | Gp3 | g.chr11:71883557C>T  | RNA               | RP11-807H22.7 |          |                            | 46 (0.02)  | 61 (0.15)  | 0.39 |
| 11-02 | Gp3 | g.chr11:71628760G>A  | Missense Mutation | RP11-849H4.2  | p.P84S   |                            | 25 (0.00)  | 28 (0.18)  | 0.48 |
| 11-02 | Gp3 | g.chr1:152128561A>G  | Silent            | RPTN          | p.G338G  | repetin                    | 23 (0.00)  | 26 (0.38)  | 1.03 |
| 11-02 | Gp3 | g.chr2:7035982C>A    | Missense Mutation | RSAD2         | p.A332D  | radical S-adenosyl meth    | 32 (0.00)  | 32 (0.16)  | 0.42 |
| 11-02 | Gp3 | g.chr2:120219539C>A  | Missense Mutation | SCTR          | p.C225F  | secretin receptor          | 22 (0.00)  | 58 (0.16)  | 0.41 |
| 11-02 | Gp3 | g.chr1:169847850C>T  | Silent            | SCYL3         | p.L92L   | SCY1-like 3 (S. cerevisi   | 73 (0.00)  | 50 (0.18)  | 0.48 |
| 11-02 | Gp3 | g.chr2:192701129C>G  | Missense Mutation | SDPR          | p.E266D  | serum deprivation respo    | 63 (0.00)  | 54 (0.30)  | 0.79 |
| 11-02 | Gp3 | g.chr11:57367608C>T  | Missense Mutation | SERPING1      | p.T108I  | serpin peptidase inhibi    | 33 (0.00)  | 35 (0.14)  | 0.38 |
| 11-02 | Gp3 | g.chr19:38643504G>A  | Silent            | SIPA1L3       | p.L1186L | signal-induced prolifera   | 18 (0.00)  | 45 (0.16)  | 0.41 |
| 11-02 | Gp3 | g.chr6:133093327C>A  | Missense Mutation | SLC18B1       | p.E368D  | solute carrier family 18,  | 25 (0.00)  | 21 (0.43)  | 1.14 |
| 11-02 | Gp3 | g.chr11:107677576C>T | Silent            | SLC35F2       | p.V147V  | solute carrier family 35,  | 20 (0.00)  | 30 (0.20)  | 0.53 |
| 11-02 | Gp3 | g.chr3:136573439G>A  | Missense Mutation | SLC35G2       | p.G46E   | solute carrier family 35,  | 73 (0.00)  | 83 (0.23)  | 0.61 |
| 11-02 | Gp3 | g.chr17:19458552G>A  | Missense Mutation | SLC47A1       | p.G168R  | solute carrier family 47   | 31 (0.00)  | 42 (0.14)  | 0.38 |
| 11-02 | Gp3 | g.chr2:46986732G>A   | Missense Mutation | SOCS5         | p.G355R  | suppressor of cytokine s   | 22 (0.00)  | 42 (0.14)  | 0.38 |
| 11-02 | Gp3 | g.chr10:107012537C>T | Missense Mutation | SORCS3        | p.T1037I | sortilin-related VPS10 d   | 26 (0.00)  | 42 (0.14)  | 0.38 |
| 11-02 | Gp3 | g.chr4:52928427G>A   | Silent            | SPATA18       | p.R117R  | spermatogenesis associa    | 28 (0.00)  | 23 (0.22)  | 0.58 |
| 11-02 | Gp3 | g.chr9:90500141C>T   | Nonsense Mutation | SPATA31E1     | p.Q247*  | SPATA31 subfamily E,       | 15 (0.00)  | 28 (0.29)  | 0.76 |
| 11-02 | Gp3 | g.chr5:35654817G>A   | Missense Mutation | SPEF2         | p.E323K  | sperm flagellar 2          | 45 (0.00)  | 34 (0.15)  | 0.39 |

|       |     |                      |                   |         |           |                           |              |           |      |
|-------|-----|----------------------|-------------------|---------|-----------|---------------------------|--------------|-----------|------|
| 11-02 | Gp3 | g.chr3:113169348G>T  | Missense Mutation | SPICE1  | p.Q720K   | spindle and centriole ass | 51 (0.00)    | 34 (0.15) | 0.39 |
| 11-02 | Gp3 | g.chr12:119588882C>T | Silent            | SRRM4   | p.S379S   | serine/arginine repetitiv | 35 (0.00)    | 36 (0.17) | 0.44 |
| 11-02 | Gp3 | g.chr7:89791253G>A   | Nonsense Mutation | STEAP1  | p.W208*   | six transmembrane epit    | 33 (0.00)    | 34 (0.15) | 0.39 |
| 11-02 | Gp3 | g.chr2:169023845C>A  | Missense Mutation | STK39   | p.D132Y   | serine threonine kinase   | 23 (0.00)    | 26 (0.19) | 0.51 |
| 11-02 | Gp3 | g.chr13:37614715G>T  | Missense Mutation | SUPT20H | p.Q171K   | suppressor of Ty 20 hon   | 33 (0.00)    | 26 (0.23) | 0.62 |
| 11-02 | Gp3 | g.chr10:29813467G>T  | Missense Mutation | SVIL    | p.D840E   | supervillin               | 25 (0.00)    | 32 (0.16) | 0.42 |
| 11-02 | Gp3 | g.chr19:46355615G>A  | Missense Mutation | SYMPK   | p.S85L    | symplekin                 | 54 (0.00)    | 43 (0.16) | 0.43 |
| 11-02 | Gp3 | g.chr1:155838178G>A  | Missense Mutation | SYT11   | p.E153K   | synaptotagmin XI          | 22 (0.00)    | 23 (0.22) | 0.58 |
| 11-02 | Gp3 | g.chr11:763433C>T    | Missense Mutation | TALDO1  | p.T184I   | transaldolase 1           | 18 (0.00)    | 38 (0.26) | 0.70 |
| 11-02 | Gp3 | g.chr5:167643909C>A  | Silent            | TENM2   | p.S1166S  | teneurin transmembrane    | 29 (0.00)    | 32 (0.16) | 0.42 |
| 11-02 | Gp3 | g.chr5:1278807G>A    | Silent            | TERT    | p.A745A   | telomerase reverse trans  | 28 (0.00)    | 42 (0.26) | 0.70 |
| 11-02 | Gp3 | g.chr1:36060043G>A   | Silent            | TFAP2E  | p.P365P   | transcription factor AP-  | 39 (0.00)    | 43 (0.16) | 0.43 |
| 11-02 | Gp3 | g.chr5:135389730C>T  | Missense Mutation | TGFBI   | p.R409W   | transforming growth fac   | 33 (0.00)    | 31 (0.23) | 0.60 |
| 11-02 | Gp3 | g.chr17:4675274C>T   | Silent            | TM4SF5  | p.L19L    | transmembrane 4 L six     | 131 (0.00)   | 32 (0.16) | 0.42 |
| 11-02 | Gp3 | g.chr3:129547172C>T  | Missense Mutation | TMCC1   | p.G17D    | transmembrane and coil    | 26 (0.00)    | 25 (0.24) | 0.64 |
| 11-02 | Gp3 | g.chr19:36038273C>T  | Missense Mutation | TMEM147 | p.A200V   | transmembrane protein     | 20 (0.00)    | 32 (0.19) | 0.50 |
| 11-02 | Gp3 | g.chr3:170912422C>T  | Silent            | TNIK    | p.L103L   | TRAF2 and NCK intera      | 32 (0.00)    | 29 (0.17) | 0.46 |
| 11-02 | Gp3 | g.chr14:21961036C>G  | Missense Mutation | TOX4    | p.R421G   | TOX high mobility grou    | 29 (0.00)    | 35 (0.14) | 0.38 |
| 11-02 | Gp3 | g.chr1:154164397G>T  | Missense Mutation | TPM3    | p.A33E    | tropomyosin 3             | 20 (0.00)    | 33 (0.18) | 0.48 |
| 11-02 | Gp3 | g.chr7:142124183C>T  | RNA               | TRBV6-8 |           | T cell receptor beta vari | 46 (0.00)    | 88 (0.16) | 0.42 |
| 11-02 | Gp3 | g.chr21:45815402C>T  | Missense Mutation | TRPM2   | p.R634C   | transient receptor potent | 23 (0.00)    | 31 (0.19) | 0.52 |
| 11-02 | Gp3 | g.chr9:73254084C>T   | Silent            | TRPM3   | p.L491L   | transient receptor potent | 41 (0.00)    | 34 (0.15) | 0.39 |
| 11-02 | Gp3 | g.chr2:179413004G>A  | Missense Mutation | TTN     | p.P31117S | titin                     | 80 (0.00)    | 56 (0.21) | 0.57 |
| 11-02 | Gp3 | g.chr7:19738184C>A   | Nonsense Mutation | TWISTNB | p.E258*   | TWIST neighbor            | 44 (0.00)    | 44 (0.18) | 0.48 |
| 11-02 | Gp3 | g.chr3:49848060G>T   | Missense Mutation | UBA7    | p.L453I   | ubiquitin-like modifier   | ε 50 (0.00)  | 44 (0.16) | 0.42 |
| 11-02 | Gp3 | g.chr12:125396449G>A | Silent            | UBC     | p.L243L   | ubiquitin C               | 35 (0.00)    | 23 (0.22) | 0.58 |
| 11-02 | Gp3 | g.chr1:202304786C>T  | Missense Mutation | UBE2T   | p.D33N    | ubiquitin-conjugating     | er 28 (0.00) | 36 (0.17) | 0.44 |
| 11-02 | Gp3 | g.chr2:210818859C>T  | Missense Mutation | UNC80   | p.P2370L  | unc-80 homolog (C. ele    | 20 (0.00)    | 36 (0.19) | 0.52 |
| 11-02 | Gp3 | g.chr2:219350433C>A  | Missense Mutation | USP37   | p.G470C   | ubiquitin specific peptid | 30 (0.00)    | 42 (0.14) | 0.38 |
| 11-02 | Gp3 | g.chr4:53494169C>T   | Silent            | USP46   | p.K93K    | ubiquitin specific peptid | 65 (0.00)    | 34 (0.18) | 0.47 |
| 11-02 | Gp3 | g.chr2:106721279C>T  | Silent            | UXS1    | p.G298G   | UDP-glucuronate decarl    | 30 (0.00)    | 23 (0.35) | 0.93 |
| 11-02 | Gp3 | g.chr1:109525368G>A  | Missense Mutation | WDR47   | p.T711I   | WD repeat domain 47       | 32 (0.00)    | 41 (0.15) | 0.39 |
| 11-02 | Gp3 | g.chr3:39229640C>A   | Nonsense Mutation | XIRP1   | p.E433*   | xin actin-binding repeat  | 36 (0.00)    | 55 (0.18) | 0.48 |
| 11-02 | Gp3 | g.chr16:17221564C>T  | Missense Mutation | XYLT1   | p.A728T   | xylosyltransferase I      | 30 (0.00)    | 30 (0.17) | 0.44 |
| 11-02 | Gp3 | g.chr7:100350511C>T  | RNA               | ZAN     |           | zonadhesin (gene/pseud    | 60 (0.00)    | 77 (0.21) | 0.55 |

|       |             |                     |                   |            |         |                                    |            |           |      |
|-------|-------------|---------------------|-------------------|------------|---------|------------------------------------|------------|-----------|------|
| 11-02 | Gp3         | g.chr7:100352996C>T | RNA               | ZAN        |         | zonadhesin (gene/pseud             | 32 (0.00)  | 60 (0.15) | 0.40 |
| 11-02 | Gp3         | g.chr19:44501329G>A | Silent            | ZNF155     | p.K451K | zinc finger protein 155            | 35 (0.00)  | 35 (0.17) | 0.46 |
| 11-02 | Gp3         | g.chr19:58153218G>A | Missense Mutation | ZNF211     | p.C520Y | zinc finger protein 211            | 38 (0.00)  | 36 (0.17) | 0.44 |
| 11-02 | Gp3         | g.chr16:71483677G>C | Missense Mutation | ZNF23      | p.S84C  | zinc finger protein 23             | 39 (0.00)  | 29 (0.21) | 0.55 |
| 11-02 | Gp3         | g.chr5:176468189G>A | Missense Mutation | ZNF346     | p.A80T  | zinc finger protein 346            | 34 (0.00)  | 34 (0.18) | 0.47 |
| 11-02 | Gp3         | g.chr8:28217174G>T  | Silent            | ZNF395     | p.P136P | zinc finger protein 395            | 15 (0.00)  | 20 (0.25) | 0.67 |
| 11-02 | Gp3         | g.chr19:37618915G>A | Missense Mutation | ZNF420     | p.G341E | zinc finger protein 420            | 35 (0.00)  | 27 (0.19) | 0.49 |
| 11-02 | Gp3         | g.chr2:95818989C>A  | Nonsense Mutation | ZNF514     | p.E4*   | zinc finger protein 514            | 26 (0.00)  | 30 (0.27) | 0.71 |
| 11-02 | Gp3         | g.chr19:38103622C>A | Missense Mutation | ZNF540     | p.Q481K | zinc finger protein 540            | 21 (0.00)  | 18 (0.28) | 0.74 |
| 11-02 | Gp3         | g.chr19:58059092G>A | Nonsense Mutation | ZNF550     | p.Q133* | zinc finger protein 550            | 19 (0.00)  | 25 (0.20) | 0.53 |
| 11-02 | Gp3         | g.chr19:7083237A>G  | Missense Mutation | ZNF557     | p.T259A | zinc finger protein 557            | 21 (0.00)  | 22 (0.23) | 0.61 |
| 11-02 | Gp3         | g.chr19:37975279G>A | Missense Mutation | ZNF570     | p.G252E | zinc finger protein 570            | 59 (0.02)  | 28 (0.18) | 0.48 |
| 11-02 | Gp3         | g.chr8:144733362C>T | Silent            | ZNF623     | p.F440F | zinc finger protein 623            | 41 (0.00)  | 43 (0.16) | 0.43 |
| 11-02 | Gp3         | g.chr1:247151464C>T | Missense Mutation | ZNF695     | p.C118Y | zinc finger protein 695            | 64 (0.00)  | 45 (0.33) | 0.89 |
| 11-02 | Gp3         | g.chr8:7215966G>T   | Silent            | ZNF705G    | p.V145V | zinc finger protein 705C           | 71 (0.00)  | 51 (0.18) | 0.47 |
| 11-02 | Gp4 Focus 1 | g.chr21:43645879C>T | Silent            | ABCG1      | p.D47D  | ATP-binding cassette, s            | 23 (0.00)  | 46 (0.15) | 0.41 |
| 11-02 | Gp4 Focus 1 | g.chr3:100494114G>A | Missense Mutation | ABI3BP     | p.P756S | ABI family, member 3               | 34 (0.00)  | 31 (0.16) | 0.43 |
| 11-02 | Gp4 Focus 1 | g.chr2:62373941A>G  | RNA               | AC018462.2 |         |                                    | 58 (0.00)  | 38 (0.18) | 0.49 |
| 11-02 | Gp4 Focus 1 | g.chr17:61560475G>A | Nonsense Mutation | ACE        | p.W476* | angiotensin I converting           | 21 (0.00)  | 20 (0.35) | 0.93 |
| 11-02 | Gp4 Focus 1 | g.chr14:23548758T>A | Nonsense Mutation | ACIN1      | p.K654* | apoptotic chromatin con            | 26 (0.00)  | 22 (0.23) | 0.61 |
| 11-02 | Gp4 Focus 1 | g.chr1:55074779C>A  | Silent            | ACOT11     | p.T593T | acyl-CoA thioesterase 1            | 20 (0.00)  | 38 (0.16) | 0.42 |
| 11-02 | Gp4 Focus 1 | g.chr7:17373675C>G  | Missense Mutation | AHR        | p.T282S | aryl hydrocarbon recept            | 78 (0.00)  | 33 (0.15) | 0.40 |
| 11-02 | Gp4 Focus 1 | g.chr2:202359356G>T | Missense Mutation | ALS2CR11   | p.H570N | amyotrophic lateral scl            | 26 (0.00)  | 23 (0.22) | 0.58 |
| 11-02 | Gp4 Focus 1 | g.chr7:36698791G>A  | Missense Mutation | AOAH       | p.H124Y | acyloxyacyl hydrolase              | 127 (0.00) | 34 (0.15) | 0.39 |
| 11-02 | Gp4 Focus 1 | g.chr22:39413877G>A | Nonsense Mutation | APOBEC3C   | p.W94*  | apolipoprotein B mRNA              | 18 (0.00)  | 30 (0.20) | 0.53 |
| 11-02 | Gp4 Focus 1 | g.chr12:14577708C>T | Missense Mutation | ATF7IP     | p.R287C | activating transcription           | 158 (0.00) | 53 (0.15) | 0.40 |
| 11-02 | Gp4 Focus 1 | g.chr17:40659636C>T | Silent            | ATP6V0A1   | p.D708D | ATPase, H <sup>+</sup> transportin | 39 (0.00)  | 63 (0.16) | 0.42 |
| 11-02 | Gp4 Focus 1 | g.chr13:52548503C>T | Missense Mutation | ATP7B      | p.V285I | ATPase, Cu <sup>++</sup> transport | 55 (0.02)  | 56 (0.23) | 0.62 |
| 11-02 | Gp4 Focus 1 | g.chr7:72957881G>A  | Nonsense Mutation | BCL7B      | p.Q88*  | B-cell CLL/lymphoma                | 731 (0.00) | 37 (0.22) | 0.58 |
| 11-02 | Gp4 Focus 1 | g.chr10:43280998C>T | Missense Mutation | BMS1       | p.P82L  | BMS1 ribosome biogen               | 65 (0.00)  | 42 (0.14) | 0.38 |
| 11-02 | Gp4 Focus 1 | g.chr17:41203989C>G | Intron            | BRCA1      |         | breast cancer 1, early on          | 20 (0.00)  | 45 (0.16) | 0.41 |
| 11-02 | Gp4 Focus 1 | g.chrX:154348368G>A | Silent            | BRCC3      | p.L274L | BRCA1/BRCA2-contain                | 22 (0.00)  | 23 (0.48) | 0.80 |
| 11-02 | Gp4 Focus 1 | g.chr11:76253396C>A | Silent            | C11orf30   | p.T807T | chromosome 11 open re              | 47 (0.02)  | 46 (0.20) | 0.52 |
| 11-02 | Gp4 Focus 1 | g.chr11:66581326G>A | Splice Site       | C11orf80   |         | chromosome 11 open re              | 32 (0.00)  | 46 (0.15) | 0.41 |
| 11-02 | Gp4 Focus 1 | g.chr17:42750786C>T | Missense Mutation | C17orf104  | p.A837V | chromosome 17 open re              | 54 (0.00)  | 22 (0.23) | 0.61 |



|       |             |                     |                   |          |          |                                             |           |           |      |
|-------|-------------|---------------------|-------------------|----------|----------|---------------------------------------------|-----------|-----------|------|
| 11-02 | Gp4 Focus 1 | g.chr20:20056148C>T | Missense Mutation | C20orf26 | p.T152I  | 80 (0.00)                                   | 40 (0.15) | 0.40      |      |
| 11-02 | Gp4 Focus 1 | g.chr20:20079325G>A | Missense Mutation | C20orf26 | p.M242I  | 59 (0.00)                                   | 90 (0.17) | 0.44      |      |
| 11-02 | Gp4 Focus 1 | g.chr20:20144848G>T | Missense Mutation | C20orf26 | p.C394F  | 21 (0.00)                                   | 47 (0.15) | 0.40      |      |
| 11-02 | Gp4 Focus 1 | g.chr4:113540481T>G | Silent            | C4orf21  | p.A239A  | 37 (0.03)                                   | 38 (0.16) | 0.42      |      |
| 11-02 | Gp4 Focus 1 | g.chr3:53835144C>T  | Silent            | CACNA1D  | p.S1685S | calcium channel, voltage-dependent L-type   | 39 (0.00) | 71 (0.15) | 0.41 |
| 11-02 | Gp4 Focus 1 | g.chr3:85030486G>T  | Intron            | CADM2    |          | cell adhesion molecule 233                  | 33 (0.00) | 39 (0.15) | 0.41 |
| 11-02 | Gp4 Focus 1 | g.chr3:85592347C>T  | Intron            | CADM2    |          | cell adhesion molecule 240                  | 40 (0.00) | 50 (0.16) | 0.43 |
| 11-02 | Gp4 Focus 1 | g.chr3:85785742C>A  | Intron            | CADM2    |          | cell adhesion molecule 258                  | 58 (0.02) | 37 (0.22) | 0.58 |
| 11-02 | Gp4 Focus 1 | g.chr3:86114081C>T  | Intron            | CADM2    |          | cell adhesion molecule 234                  | 34 (0.00) | 53 (0.17) | 0.45 |
| 11-02 | Gp4 Focus 1 | g.chr6:7378997G>A   | Silent            | CAGE1    | p.N180N  | cancer antigen 1                            | 54 (0.00) | 29 (0.31) | 0.45 |
| 11-02 | Gp4 Focus 1 | g.chr19:15164317C>T | Missense Mutation | CASP14   | p.R18C   | caspase 14, apoptosis-related               | 32 (0.00) | 52 (0.21) | 0.56 |
| 11-02 | Gp4 Focus 1 | g.chr3:112068651C>T | Missense Mutation | CD200    | p.R263W  | CD200 molecule                              | 34 (0.03) | 30 (0.20) | 0.53 |
| 11-02 | Gp4 Focus 1 | g.chr2:87042805G>A  | Silent            | CD8B     | p.P189P  | CD8b molecule                               | 30 (0.00) | 45 (0.18) | 0.47 |
| 11-02 | Gp4 Focus 1 | g.chr15:49044589G>A | Silent            | CEP152   | p.H1141H | centrosomal protein 152                     | 66 (0.00) | 54 (0.28) | 0.74 |
| 11-02 | Gp4 Focus 1 | g.chr17:57771202T>A | Missense Mutation | CLTC     | p.Y1673N | clathrin, heavy chain (H)                   | 35 (0.00) | 35 (0.14) | 0.38 |
| 11-02 | Gp4 Focus 1 | g.chr22:19178915C>A | Silent            | CLTCL1   | p.L1408L | clathrin, heavy chain-like                  | 22 (0.00) | 34 (0.15) | 0.39 |
| 11-02 | Gp4 Focus 1 | g.chr4:47939447C>T  | Nonsense Mutation | CNGA1    | p.W424*  | cyclic nucleotide-gated channel alpha 1     | 28 (0.00) | 37 (0.30) | 0.79 |
| 11-02 | Gp4 Focus 1 | g.chr3:74334553C>T  | Silent            | CNTN3    | p.L869L  | contactin 3 (plasma membrane-associated)    | 80 (0.00) | 39 (0.15) | 0.41 |
| 11-02 | Gp4 Focus 1 | g.chr6:75890671C>A  | Missense Mutation | COL12A1  | p.E716D  | collagen, type XII, alpha 1                 | 36 (0.00) | 33 (0.24) | 0.65 |
| 11-02 | Gp4 Focus 1 | g.chr7:7420316C>A   | Missense Mutation | COL28A1  | p.G766V  | collagen, type XXVIII, alpha 1              | 24 (0.00) | 23 (0.22) | 0.58 |
| 11-02 | Gp4 Focus 1 | g.chr2:238006362T>C | Missense Mutation | COPS8    | p.Y203H  | COP9 signalosome subunit 8                  | 32 (0.00) | 28 (0.21) | 0.57 |
| 11-02 | Gp4 Focus 1 | g.chr8:3000122G>A   | Missense Mutation | CSMD1    | p.H2037Y | CUB and Sushi multiple domain 1             | 37 (0.00) | 32 (0.22) | 0.58 |
| 11-02 | Gp4 Focus 1 | g.chr2:204736181C>A | Missense Mutation | CTLA4    | p.L180I  | cytotoxic T-lymphocyte associated protein 4 | 18 (0.00) | 26 (0.19) | 0.51 |
| 11-02 | Gp4 Focus 1 | g.chr20:36488691C>T | Silent            | CTNBL1   | p.H329H  | catenin, beta-like 1                        | 31 (0.00) | 58 (0.16) | 0.41 |
| 11-02 | Gp4 Focus 1 | g.chr9:124350015G>A | Intron            | DAB2IP   |          | DAB2 interacting protein 24                 | 24 (0.00) | 33 (0.18) | 0.48 |
| 11-02 | Gp4 Focus 1 | g.chr9:124351438G>A | Intron            | DAB2IP   |          | DAB2 interacting protein 24                 | 24 (0.00) | 44 (0.16) | 0.42 |
| 11-02 | Gp4 Focus 1 | g.chr9:124454745T>A | Intron            | DAB2IP   |          | DAB2 interacting protein 62                 | 62 (0.00) | 41 (0.32) | 0.85 |
| 11-02 | Gp4 Focus 1 | g.chr8:11851525C>T  | Silent            | DEFB134  | p.Q55Q   | defensin, beta 134                          | 23 (0.00) | 30 (0.20) | 0.53 |
| 11-02 | Gp4 Focus 1 | g.chr11:9167340G>A  | Silent            | DENND5A  | p.I960I  | DENN/MADD domain containing 5A              | 57 (0.00) | 88 (0.17) | 0.45 |
| 11-02 | Gp4 Focus 1 | g.chr8:1626449C>T   | Silent            | DLGAP2   | p.F706F  | discs, large (Drosophila)                   | 19 (0.00) | 32 (0.16) | 0.42 |
| 11-02 | Gp4 Focus 1 | g.chr3:52434390G>A  | Silent            | DNAH1    | p.E4242E | dynein, axonemal, heavy chain 1             | 48 (0.00) | 58 (0.21) | 0.55 |
| 11-02 | Gp4 Focus 1 | g.chr5:13793793G>A  | Silent            | DNAH5    | p.F2685F | dynein, axonemal, heavy chain 5             | 21 (0.00) | 40 (0.20) | 0.53 |
| 11-02 | Gp4 Focus 1 | g.chr19:10260618C>T | Silent            | DNMT1    | p.K748K  | DNA (cytosine-5-)-methyltransferase 1       | 28 (0.00) | 43 (0.26) | 0.68 |
| 11-02 | Gp4 Focus 1 | g.chr6:83828683G>A  | Missense Mutation | DOPEY1   | p.R286Q  | dopey family member 1                       | 57 (0.00) | 32 (0.25) | 0.67 |
| 11-02 | Gp4 Focus 1 | g.chr2:109539864G>A | Silent            | EDAR     | p.V134V  | ectodysplasin A receptor                    | 30 (0.00) | 26 (0.19) | 0.51 |

|       |             |                      |                   |         |          |                                      |            |      |
|-------|-------------|----------------------|-------------------|---------|----------|--------------------------------------|------------|------|
| 11-02 | Gp4 Focus 1 | g.chr2:31484573G>T   | Missense Mutation | EHD3    | p.R358S  | EH-domain containing 17 (0.00)       | 27 (0.19)  | 0.49 |
| 11-02 | Gp4 Focus 1 | g.chr21:39759873C>T  | Intron            | ERG     |          | v-ets avian erythroblastc 16 (0.00)  | 21 (0.24)  | 0.63 |
| 11-02 | Gp4 Focus 1 | g.chr21:39828512C>G  | Intron            | ERG     |          | v-ets avian erythroblastc 34 (0.00)  | 34 (0.15)  | 0.39 |
| 11-02 | Gp4 Focus 1 | g.chr8:139144969C>A  | Missense Mutation | FAM135B | p.R1363L | family with sequence siu 24 (0.00)   | 27 (0.19)  | 0.49 |
| 11-02 | Gp4 Focus 1 | g.chr3:68466517G>T   | Missense Mutation | FAM19A1 | p.C69F   | family with sequence siu 39 (0.00)   | 29 (0.21)  | 0.55 |
| 11-02 | Gp4 Focus 1 | g.chr1:179019498C>T  | Silent            | FAM20B  | p.D154D  | family with sequence siu 18 (0.00)   | 38 (0.16)  | 0.42 |
| 11-02 | Gp4 Focus 1 | g.chr10:88782077C>T  | Missense Mutation | FAM25A  | p.A27V   | family with sequence siu 25 (0.00)   | 46 (0.15)  | 0.41 |
| 11-02 | Gp4 Focus 1 | g.chr16:67576736G>A  | Missense Mutation | FAM65A  | p.E697K  | family with sequence siu 19 (0.00)   | 49 (0.20)  | 0.54 |
| 11-02 | Gp4 Focus 1 | g.chr3:75480010C>T   | RNA               | FAM86DP |          | family with sequence siu 37 (0.00)   | 51 (0.18)  | 0.47 |
| 11-02 | Gp4 Focus 1 | g.chr12:50047588C>A  | Missense Mutation | FMNL3   | p.V330F  | formin-like 3 63 (0.00)              | 120 (0.15) | 0.40 |
| 11-02 | Gp4 Focus 1 | g.chrX:49110956G>A   | Intron            | FOXP3   |          | forkhead box P3 22 (0.00)            | 20 (0.30)  | 0.50 |
| 11-02 | Gp4 Focus 1 | g.chr1:155187141C>A  | RNA               | GBAP1   |          | glucosidase, beta, acid p20 (0.00)   | 28 (0.25)  | 0.67 |
| 11-02 | Gp4 Focus 1 | g.chr11:134163074G>T | Missense Mutation | GLB1L3  | p.D283Y  | galactosidase, beta 1-lik 24 (0.00)  | 55 (0.16)  | 0.44 |
| 11-02 | Gp4 Focus 1 | g.chr7:86394782G>A   | Silent            | GRM3    | p.E107E  | glutamate receptor, met: 49 (0.00)   | 49 (0.16)  | 0.44 |
| 11-02 | Gp4 Focus 1 | g.chr6:52761661C>A   | Missense Mutation | GSTA3   | p.R204S  | glutathione S-transferase 16 (0.00)  | 27 (0.19)  | 0.49 |
| 11-02 | Gp4 Focus 1 | g.chr7:18539193C>T   | Intron            | HDAC9   |          | histone deacetylase 9 27 (0.00)      | 28 (0.18)  | 0.48 |
| 11-02 | Gp4 Focus 1 | g.chr7:18743873G>T   | Intron            | HDAC9   |          | histone deacetylase 9 67 (0.00)      | 48 (0.17)  | 0.44 |
| 11-02 | Gp4 Focus 1 | g.chr7:18796465G>A   | Intron            | HDAC9   |          | histone deacetylase 9 84 (0.00)      | 84 (0.21)  | 0.57 |
| 11-02 | Gp4 Focus 1 | g.chr12:66704368C>T  | Missense Mutation | HELB    | p.H554Y  | helicase (DNA) B 27 (0.00)           | 54 (0.20)  | 0.54 |
| 11-02 | Gp4 Focus 1 | g.chr17:65124801C>T  | Missense Mutation | HELZ    | p.G1118E | helicase with zinc finger 55 (0.02)  | 35 (0.17)  | 0.46 |
| 11-02 | Gp4 Focus 1 | g.chr15:63946451C>A  | Missense Mutation | HERC1   | p.W3386L | HECT and RLD domain 16 (0.00)        | 21 (0.33)  | 0.89 |
| 11-02 | Gp4 Focus 1 | g.chrX:131762852G>T  | Missense Mutation | HS6ST2  | p.S446Y  | heparan sulfate 6-O-sulf 28 (0.00)   | 25 (0.36)  | 0.60 |
| 11-02 | Gp4 Focus 1 | g.chr5:63256374G>A   | Silent            | HTR1A   | p.S391S  | 5-hydroxytryptamine (ser 22 (0.00)   | 37 (0.30)  | 0.79 |
| 11-02 | Gp4 Focus 1 | g.chr3:50340004G>A   | Silent            | HYAL1   | p.I128I  | hyaluronoglucosaminidase 39 (0.00)   | 34 (0.15)  | 0.39 |
| 11-02 | Gp4 Focus 1 | g.chr14:106235827C>G | RNA               | IGHG3   |          | immunoglobulin heavy chain 18 (0.00) | 34 (0.15)  | 0.39 |
| 11-02 | Gp4 Focus 1 | g.chr4:142955703C>G  | Intron            | INPP4B  |          | inositol polyphosphate 27 (0.00)     | 32 (0.22)  | 0.58 |
| 11-02 | Gp4 Focus 1 | g.chr4:142956213C>T  | Intron            | INPP4B  |          | inositol polyphosphate 45 (0.00)     | 34 (0.15)  | 0.39 |
| 11-02 | Gp4 Focus 1 | g.chr4:143067699C>T  | Intron            | INPP4B  |          | inositol polyphosphate 135 (0.00)    | 86 (0.17)  | 0.47 |
| 11-02 | Gp4 Focus 1 | g.chr4:143275368C>A  | Intron            | INPP4B  |          | inositol polyphosphate 63 (0.00)     | 62 (0.15)  | 0.39 |
| 11-02 | Gp4 Focus 1 | g.chr4:143410918G>A  | Intron            | INPP4B  |          | inositol polyphosphate 41 (0.00)     | 41 (0.17)  | 0.46 |
| 11-02 | Gp4 Focus 1 | g.chr4:143723310C>G  | Intron            | INPP4B  |          | inositol polyphosphate 51 (0.00)     | 41 (0.15)  | 0.39 |
| 11-02 | Gp4 Focus 1 | g.chr19:7170717G>A   | Silent            | INSR    | p.L438L  | insulin receptor 45 (0.00)           | 50 (0.16)  | 0.43 |
| 11-02 | Gp4 Focus 1 | g.chr20:13260484G>A  | Silent            | ISM1    | p.R194R  | isthmin 1, angiogenesis 30 (0.00)    | 28 (0.18)  | 0.48 |
| 11-02 | Gp4 Focus 1 | g.chr12:26731671G>A  | Silent            | ITPR2   | p.S1535S | inositol 1,4,5-trisphosph 50 (0.00)  | 63 (0.19)  | 0.51 |
| 11-02 | Gp4 Focus 1 | g.chr10:64968225C>G  | Missense Mutation | JMJD1C  | p.M1068I | jumonji domain containi 21 (0.00)    | 32 (0.16)  | 0.42 |

|       |             |                      |                   |           |           |                                              |            |           |      |
|-------|-------------|----------------------|-------------------|-----------|-----------|----------------------------------------------|------------|-----------|------|
| 11-02 | Gp4 Focus 1 | g.chr17:45747113G>A  | Missense Mutation | KPNB1     | p.V287I   | karyopherin (importin) l27                   | 0.00       | 35 (0.17) | 0.46 |
| 11-02 | Gp4 Focus 1 | g.chr12:53164961C>A  | Nonsense Mutation | KRT76     | p.G436*   | keratin 76                                   | 19 (0.00)  | 25 (0.20) | 0.53 |
| 11-02 | Gp4 Focus 1 | g.chr1:183209311C>T  | Missense Mutation | LAMC2     | p.T1069M  | laminin, gamma 2                             | 24 (0.00)  | 30 (0.17) | 0.44 |
| 11-02 | Gp4 Focus 1 | g.chr19:54783777G>C  | Missense Mutation | LILRB2    | p.P75R    | leukocyte immunoglobulin 28                  | 0.00       | 35 (0.14) | 0.38 |
| 11-02 | Gp4 Focus 1 | g.chr22:31668537G>A  | Missense Mutation | LIMK2     | p.D469N   | LIM domain kinase 2                          | 18 (0.00)  | 26 (0.23) | 0.62 |
| 11-02 | Gp4 Focus 1 | g.chr4:83867604G>A   | Silent            | LIN54     | p.T325T   | lin-54 DREAM MuvB c48                        | 0.00       | 23 (0.22) | 0.58 |
| 11-02 | Gp4 Focus 1 | g.chr1:211591173C>G  | RNA               | LINC00467 |           | long intergenic non-protein coding RNA 467   | 0.00       | 32 (0.19) | 0.50 |
| 11-02 | Gp4 Focus 1 | g.chr4:54344843G>A   | Missense Mutation | LNX1      | p.L518F   | ligand of numb-protein tyrosine kinase 1     | 18 (0.00)  | 28 (0.21) | 0.57 |
| 11-02 | Gp4 Focus 1 | g.chr2:99900919C>T   | Silent            | LYG1      | p.L174L   | lysozyme G-like 1                            | 15 (0.00)  | 26 (0.19) | 0.51 |
| 11-02 | Gp4 Focus 1 | g.chr7:77686192C>G   | Intron            | MAGI2     |           | membrane associated glycoprotein 58          | 0.00       | 43 (0.23) | 0.62 |
| 11-02 | Gp4 Focus 1 | g.chr7:77789007G>A   | Intron            | MAGI2     |           | membrane associated glycoprotein 67          | 0.00       | 69 (0.17) | 0.46 |
| 11-02 | Gp4 Focus 1 | g.chr7:77845738C>T   | Intron            | MAGI2     |           | membrane associated glycoprotein 63          | 0.00       | 54 (0.17) | 0.44 |
| 11-02 | Gp4 Focus 1 | g.chr7:77862753G>A   | Intron            | MAGI2     |           | membrane associated glycoprotein 34          | 0.00       | 32 (0.19) | 0.50 |
| 11-02 | Gp4 Focus 1 | g.chr7:77871589G>A   | Intron            | MAGI2     |           | membrane associated glycoprotein 62          | 0.00       | 35 (0.17) | 0.46 |
| 11-02 | Gp4 Focus 1 | g.chr7:77991375T>G   | Intron            | MAGI2     |           | membrane associated glycoprotein 25          | 0.00       | 35 (0.17) | 0.46 |
| 11-02 | Gp4 Focus 1 | g.chrX:43590528G>A   | Missense Mutation | MAOA      | p.R229Q   | monoamine oxidase A                          | 17 (0.00)  | 26 (0.23) | 0.38 |
| 11-02 | Gp4 Focus 1 | g.chr1:232941108A>T  | Silent            | MAP10     | p.R113R   | microtubule-associated protein 19            | 0.00       | 30 (0.30) | 0.80 |
| 11-02 | Gp4 Focus 1 | g.chr2:27246242G>T   | Missense Mutation | MAPRE3    | p.C55F    | microtubule-associated protein 21            | 0.00       | 29 (0.24) | 0.64 |
| 11-02 | Gp4 Focus 1 | g.chr5:112384889C>T  | Silent            | MCC       | p.V852V   | mutated in colorectal cancer 17              | 0.00       | 29 (0.24) | 0.64 |
| 11-02 | Gp4 Focus 1 | g.chr14:47687273C>G  | Missense Mutation | MDGA2     | p.E113D   | MAM domain containing protein 38             | 0.00       | 33 (0.18) | 0.48 |
| 11-02 | Gp4 Focus 1 | g.chr7:116415163G>A  | Missense Mutation | MET       | p.R1104K  | MET proto-oncogene, receptor tyrosine kinase | 26 (0.00)  | 34 (0.15) | 0.39 |
| 11-02 | Gp4 Focus 1 | g.chr11:12315287C>T  | Silent            | MICALCL   | p.L103L   | MICAL C-terminal like 24                     | 0.00       | 32 (0.16) | 0.42 |
| 11-02 | Gp4 Focus 1 | g.chr10:129904320C>A | Silent            | MKI67     | p.L1928L  | marker of proliferation 121                  | 0.00       | 18 (0.33) | 0.89 |
| 11-02 | Gp4 Focus 1 | g.chr6:168289995C>A  | Missense Mutation | MLLT4     | p.P333Q   | myeloid/lymphoid or mixed lineage leukemia 2 | 0.00       | 28 (0.21) | 0.57 |
| 11-02 | Gp4 Focus 1 | g.chr6:42176624G>C   | Missense Mutation | MRPS10    | p.P165R   | mitochondrial ribosomal protein S10          | 37 (0.00)  | 31 (0.16) | 0.43 |
| 11-02 | Gp4 Focus 1 | g.chr2:190926977C>A  | Nonsense Mutation | MSTN      | p.E116*   | myostatin                                    | 67 (0.00)  | 55 (0.15) | 0.39 |
| 11-02 | Gp4 Focus 1 | g.chr1:155160769G>A  | Missense Mutation | MUC1      | p.S253F   | mucin 1, cell surface associated             | 35 (0.00)  | 28 (0.25) | 0.67 |
| 11-02 | Gp4 Focus 1 | g.chr19:9017374G>A   | Silent            | MUC16     | p.T12650T | mucin 16, cell surface associated            | 41 (0.00)  | 47 (0.21) | 0.57 |
| 11-02 | Gp4 Focus 1 | g.chrX:3248695C>A    | Missense Mutation | MXRA5     | p.S103I   | matrix-remodelling associated protein 28     | 0.00       | 28 (0.25) | 0.42 |
| 11-02 | Gp4 Focus 1 | g.chr17:10247281G>A  | Missense Mutation | MYH13     | p.A577V   | myosin, heavy chain 13, class II             | 34 (0.00)  | 38 (0.16) | 0.42 |
| 11-02 | Gp4 Focus 1 | g.chr1:148753402C>G  | Silent            | NBPF16    | p.G473G   | nucleo-actin binding protein 16              | 33 (0.00)  | 37 (0.19) | 0.50 |
| 11-02 | Gp4 Focus 1 | g.chr2:152410459C>A  | Missense Mutation | NEB       | p.K6503N  | nebulin                                      | 117 (0.00) | 92 (0.15) | 0.41 |
| 11-02 | Gp4 Focus 1 | g.chr1:179533840G>A  | Silent            | NPHS2     | p.I121I   | nephrosis 2, idiopathic, autosomal recessive | 25 (0.00)  | 41 (0.15) | 0.39 |
| 11-02 | Gp4 Focus 1 | g.chr18:11619712C>T  | RNA               | NPIP1P    |           | nuclear pore complex in protein 1            | 42 (0.02)  | 32 (0.19) | 0.50 |
| 11-02 | Gp4 Focus 1 | g.chr14:90782992C>T  | Missense Mutation | NRDE2     | p.D113N   | NRDE-2, necessary for spermatogenesis        | 67 (0.01)  | 74 (0.24) | 0.65 |

|       |             |                      |                   |              |          |                             |            |           |      |
|-------|-------------|----------------------|-------------------|--------------|----------|-----------------------------|------------|-----------|------|
| 11-02 | Gp4 Focus 1 | g.chr10:74884001G>A  | Missense Mutation | NUDT13       | p.E130K  | nudix (nucleoside diphospho | 31 (0.00)  | 44 (0.20) | 0.55 |
| 11-02 | Gp4 Focus 1 | g.chr12:69115726G>A  | Missense Mutation | NUP107       | p.D444N  | nucleoporin 107kDa          | 32 (0.00)  | 38 (0.18) | 0.49 |
| 11-02 | Gp4 Focus 1 | g.chr8:103573071C>A  | Missense Mutation | ODF1         | p.P238T  | outer dense fiber of sper   | 18 (0.00)  | 27 (0.19) | 0.49 |
| 11-02 | Gp4 Focus 1 | g.chr9:131262402C>T  | Silent            | ODF2         | p.S781S  | outer dense fiber of sper   | 26 (0.00)  | 39 (0.15) | 0.41 |
| 11-02 | Gp4 Focus 1 | g.chr9:137990310C>T  | Missense Mutation | OLFM1        | p.S185F  | olfactomedin 1              | 28 (0.00)  | 34 (0.15) | 0.39 |
| 11-02 | Gp4 Focus 1 | g.chr17:3119514C>T   | Silent            | OR1A1        | p.Y200Y  | olfactory receptor, famil   | 27 (0.00)  | 41 (0.15) | 0.39 |
| 11-02 | Gp4 Focus 1 | g.chr5:180167047G>T  | Missense Mutation | OR2Y1        | p.F4L    | olfactory receptor, famil   | 40 (0.00)  | 34 (0.18) | 0.47 |
| 11-02 | Gp4 Focus 1 | g.chr2:179248852G>T  | Missense Mutation | OSBPL6       | p.E679D  | oxysterol binding protei    | 29 (0.00)  | 26 (0.31) | 0.82 |
| 11-02 | Gp4 Focus 1 | g.chr12:29649170G>A  | Silent            | OVCH1        | p.S75S   | ovochoymase 1               | 53 (0.00)  | 38 (0.16) | 0.42 |
| 11-02 | Gp4 Focus 1 | g.chr3:16336429G>T   | Silent            | OXNAD1       | p.L119L  | oxidoreductase NAD-bi       | 33 (0.00)  | 45 (0.20) | 0.53 |
| 11-02 | Gp4 Focus 1 | g.chr1:233386551G>A  | Missense Mutation | PCNXL2       | p.S719F  | pecanex-like 2 (Drosopl     | 29 (0.00)  | 30 (0.23) | 0.62 |
| 11-02 | Gp4 Focus 1 | g.chr12:54969820G>A  | Missense Mutation | PDE1B        | p.D397N  | phosphodiesterase 1B, c     | 17 (0.00)  | 32 (0.25) | 0.67 |
| 11-02 | Gp4 Focus 1 | g.chr16:70016514C>A  | RNA               | PDXDC2P      |          | pyridoxal-dependent dec     | 36 (0.00)  | 48 (0.15) | 0.39 |
| 11-02 | Gp4 Focus 1 | g.chr5:139682637C>T  | Missense Mutation | PFDN1        | p.E8K    | prefoldin subunit 1         | 47 (0.00)  | 68 (0.19) | 0.51 |
| 11-02 | Gp4 Focus 1 | g.chr3:111632200G>A  | Missense Mutation | PHLDB2       | p.C43Y   | pleckstrin homology-lik     | 71 (0.00)  | 70 (0.14) | 0.38 |
| 11-02 | Gp4 Focus 1 | g.chr18:60392303G>A  | Intron            | PHLPP1       |          | PH domain and leucine       | 45 (0.00)  | 46 (0.15) | 0.41 |
| 11-02 | Gp4 Focus 1 | g.chr10:99410734C>A  | Missense Mutation | PI4K2A       | p.P158T  | phosphatidylinositol 4-k    | 27 (0.00)  | 29 (0.24) | 0.64 |
| 11-02 | Gp4 Focus 1 | g.chr7:47847872G>A   | Silent            | PKD1L1       | p.D2600D | polycystic kidney diseas    | 19 (0.00)  | 34 (0.15) | 0.39 |
| 11-02 | Gp4 Focus 1 | g.chr8:48866366C>T   | Splice Site       | PRKDC        |          | protein kinase, DNA-ac      | 40 (0.00)  | 54 (0.19) | 0.49 |
| 11-02 | Gp4 Focus 1 | g.chr9:80919829G>A   | Missense Mutation | PSAT1        | p.V124I  | phosphoserine aminotra      | 26 (0.00)  | 40 (0.15) | 0.40 |
| 11-02 | Gp4 Focus 1 | g.chr4:87610284G>A   | Missense Mutation | PTPN13       | p.A163T  | protein tyrosine phosph     | 80 (0.00)  | 83 (0.14) | 0.39 |
| 11-02 | Gp4 Focus 1 | g.chr17:29848234C>T  | Missense Mutation | RAB11FIP4    | p.S205F  | RAB11 family interacti      | 15 (0.00)  | 21 (0.33) | 0.89 |
| 11-02 | Gp4 Focus 1 | g.chr20:20493370G>T  | Missense Mutation | RALGAPA2     | p.T1548N | Ral GTPase activating p     | 47 (0.00)  | 42 (0.17) | 0.44 |
| 11-02 | Gp4 Focus 1 | g.chr2:33749101G>A   | Silent            | RASGRP3      | p.K224K  | RAS guanyl releasing p      | 49 (0.00)  | 54 (0.15) | 0.40 |
| 11-02 | Gp4 Focus 1 | g.chr16:24581289C>T  | Missense Mutation | RBBP6        | p.S1093F | retinoblastoma binding      | 18 (0.00)  | 21 (0.24) | 0.63 |
| 11-02 | Gp4 Focus 1 | g.chr12:130892351G>A | Missense Mutation | RIMBP2       | p.R949C  | RIMS binding protein 2      | 29 (0.00)  | 40 (0.15) | 0.40 |
| 11-02 | Gp4 Focus 1 | g.chr20:19951526C>G  | Missense Mutation | RIN2         | p.T243R  | Ras and Rab interactor      | 255 (0.00) | 55 (0.16) | 0.44 |
| 11-02 | Gp4 Focus 1 | g.chr12:49258603C>G  | Missense Mutation | RND1         | p.E57D   | Rho family GTPase 1         | 16 (0.00)  | 36 (0.17) | 0.44 |
| 11-02 | Gp4 Focus 1 | g.chr2:11375994A>C   | Missense Mutation | ROCK2        | p.V186G  | Rho-associated, coiled-c    | 92 (0.00)  | 30 (0.17) | 0.44 |
| 11-02 | Gp4 Focus 1 | g.chr9:94488909C>T   | Missense Mutation | ROR2         | p.A434T  | receptor tyrosine kinase    | 26 (0.00)  | 33 (0.15) | 0.40 |
| 11-02 | Gp4 Focus 1 | g.chr12:130521351G>A | lincRNA           | RP11-474D1.3 |          |                             | 37 (0.00)  | 42 (0.24) | 0.63 |
| 11-02 | Gp4 Focus 1 | g.chr14:62014499G>C  | Nonstop Mutation  | RP11-47122.4 | p.*105S  |                             | 25 (0.00)  | 64 (0.16) | 0.42 |
| 11-02 | Gp4 Focus 1 | g.chr9:91262386C>T   | lincRNA           | RP13-60M5.2  |          |                             | 25 (0.00)  | 31 (0.16) | 0.43 |
| 11-02 | Gp4 Focus 1 | g.chr22:42973163C>A  | RNA               | RRP7B        |          | ribosomal RNA process       | 20 (0.00)  | 33 (0.15) | 0.40 |
| 11-02 | Gp4 Focus 1 | g.chr1:237433839G>A  | Missense Mutation | RYR2         | p.E31K   | ryanodine receptor 2 (ca    | 41 (0.00)  | 34 (0.18) | 0.47 |

|       |             |                      |                   |         |           |                                            |           |           |      |
|-------|-------------|----------------------|-------------------|---------|-----------|--------------------------------------------|-----------|-----------|------|
| 11-02 | Gp4 Focus 1 | g.chr1:109779137C>T  | Silent            | SARS    | p.I408I   | seryl-tRNA synthetase 39 (0.00)            | 35 (0.14) | 0.38      |      |
| 11-02 | Gp4 Focus 1 | g.chr11:92881964G>A  | Silent            | SLC36A4 | p.F283F   | solute carrier family 36 (0.00)            | 40 (0.21) | 0.57      |      |
| 11-02 | Gp4 Focus 1 | g.chr2:103324751C>T  | Missense Mutation | SLC9A2  | p.P748S   | solute carrier family 9, s26 (0.00)        | 23 (0.26) | 0.70      |      |
| 11-02 | Gp4 Focus 1 | g.chr21:34922313C>G  | Nonsense Mutation | SON     | p.S259*   | SON DNA binding prot 31 (0.00)             | 40 (0.17) | 0.47      |      |
| 11-02 | Gp4 Focus 1 | g.chr17:47693677G>C  | Intron            | SPOP    |           | speckle-type POZ protei24 (0.00)           | 17 (0.29) | 0.78      |      |
| 11-02 | Gp4 Focus 1 | g.chr1:158644160C>T  | Missense Mutation | SPTA1   | p.V437M   | spectrin, alpha, erythrocyte 24 (0.00)     | 15 (0.33) | 0.89      |      |
| 11-02 | Gp4 Focus 1 | g.chr1:24976542C>T   | Silent            | SRRM1   | p.S162S   | serine/arginine repetitive 57 (0.00)       | 37 (0.16) | 0.43      |      |
| 11-02 | Gp4 Focus 1 | g.chr15:42982000G>C  | Missense Mutation | STARD9  | p.A2742P  | StAR-related lipid transfer 23 (0.00)      | 19 (0.32) | 0.84      |      |
| 11-02 | Gp4 Focus 1 | g.chr9:113231257C>A  | Silent            | SVEP1   | p.T1018T  | sushi, von Willebrand factor 25 (0.00)     | 29 (0.24) | 0.64      |      |
| 11-02 | Gp4 Focus 1 | g.chr20:60582632G>A  | Missense Mutation | TAF4    | p.P649S   | TAF4 RNA polymerase 25 (0.00)              | 32 (0.16) | 0.42      |      |
| 11-02 | Gp4 Focus 1 | g.chr15:78309013C>T  | Silent            | TBC1D2B | p.K550K   | TBC1 domain family, member 29 (0.00)       | 45 (0.16) | 0.41      |      |
| 11-02 | Gp4 Focus 1 | g.chr5:133481963C>A  | Missense Mutation | TCF7    | p.P375Q   | transcription factor 7 (Tcf7) 17 (0.00)    | 45 (0.16) | 0.41      |      |
| 11-02 | Gp4 Focus 1 | g.chr10:115985900C>T | Missense Mutation | TDRD1   | p.P1034S  | tudor domain containing 23 (0.00)          | 32 (0.16) | 0.42      |      |
| 11-02 | Gp4 Focus 1 | g.chr12:117494688C>T | Silent            | TESC    | p.K44K    | tescalcin 18 (0.00)                        | 51 (0.16) | 0.42      |      |
| 11-02 | Gp4 Focus 1 | g.chr14:24730920G>T  | Silent            | TGM1    | p.I163I   | transglutaminase 1 52 (0.00)               | 82 (0.17) | 0.46      |      |
| 11-02 | Gp4 Focus 1 | g.chr4:153692066T>A  | Missense Mutation | TIGD4   | p.N31Y    | tigger transposable element 64 (0.00)      | 55 (0.15) | 0.39      |      |
| 11-02 | Gp4 Focus 1 | g.chr16:84516239T>A  | Missense Mutation | TLDC1   | p.M346L   | TBC/LysM-associated domain 19 (0.00)       | 30 (0.17) | 0.44      |      |
| 11-02 | Gp4 Focus 1 | g.chr20:2591130G>A   | Silent            | TMC2    | p.L493L   | transmembrane channel 26 (0.00)            | 40 (0.15) | 0.40      |      |
| 11-02 | Gp4 Focus 1 | g.chr9:32544248G>A   | Missense Mutation | TOPORS  | p.T92I    | topoisomerase I binding 42 (0.00)          | 46 (0.15) | 0.41      |      |
| 11-02 | Gp4 Focus 1 | g.chr3:36899298C>T   | Missense Mutation | TRANK1  | p.D45N    | tetratricopeptide repeat 23 (0.00)         | 75 (0.16) | 0.43      |      |
| 11-02 | Gp4 Focus 1 | g.chr6:42196305C>T   | Silent            | TRERF1  | p.E1127E  | transcriptional regulator 19 (0.00)        | 47 (0.17) | 0.45      |      |
| 11-02 | Gp4 Focus 1 | g.chr7:72430569G>A   | Missense Mutation | TRIM74  | p.H237Y   | tripartite motif containing 16 (0.00)      | 27 (0.19) | 0.49      |      |
| 11-02 | Gp4 Focus 1 | g.chr10:75051504C>T  | Silent            | TTC18   | p.L177L   |                                            | 30 (0.00) | 48 (0.15) | 0.39 |
| 11-02 | Gp4 Focus 1 | g.chr2:179396504C>A  | Silent            | TTN     | p.L34946L | titin 19 (0.00)                            | 36 (0.25) | 0.67      |      |
| 11-02 | Gp4 Focus 1 | g.chr2:179424827C>A  | Missense Mutation | TTN     | p.D28678Y | titin 35 (0.00)                            | 46 (0.15) | 0.41      |      |
| 11-02 | Gp4 Focus 1 | g.chr2:179438809G>A  | Missense Mutation | TTN     | p.A24017V | titin 51 (0.00)                            | 58 (0.17) | 0.46      |      |
| 11-02 | Gp4 Focus 1 | g.chr2:179580233G>A  | Silent            | TTN     | p.S8636S  | titin 28 (0.00)                            | 28 (0.21) | 0.57      |      |
| 11-02 | Gp4 Focus 1 | g.chr2:179638312C>A  | Missense Mutation | TTN     | p.V2491L  | titin 24 (0.00)                            | 34 (0.15) | 0.39      |      |
| 11-02 | Gp4 Focus 1 | g.chr13:96536912G>A  | Missense Mutation | UGGT2   | p.P1021S  | UDP-glucose glycoprotein 29 (0.00)         | 37 (0.24) | 0.65      |      |
| 11-02 | Gp4 Focus 1 | g.chr19:17722620C>T  | Missense Mutation | UNC13A  | p.E1535K  | unc-13 homolog A (C. elegans) 23 (0.00)    | 26 (0.19) | 0.51      |      |
| 11-02 | Gp4 Focus 1 | g.chr2:210642248G>A  | Missense Mutation | UNC80   | p.V189M   | unc-80 homolog (C. elegans) 36 (0.00)      | 56 (0.14) | 0.38      |      |
| 11-02 | Gp4 Focus 1 | g.chr11:17542914C>T  | Missense Mutation | USH1C   | p.R355K   | Usher syndrome 1C (autosomal) 45 (0.00)    | 79 (0.19) | 0.51      |      |
| 11-02 | Gp4 Focus 1 | g.chr16:23079601G>T  | Missense Mutation | USP31   | p.H1275Q  | ubiquitin specific peptidase 56 (0.00)     | 74 (0.16) | 0.43      |      |
| 11-02 | Gp4 Focus 1 | g.chr10:75280686G>A  | Missense Mutation | USP54   | p.A821V   | ubiquitin specific peptidase 24 (0.00)     | 23 (0.22) | 0.58      |      |
| 11-02 | Gp4 Focus 1 | g.chr7:123329143G>A  | Missense Mutation | WASL    | p.A470V   | Wiskott-Aldrich syndrome protein 33 (0.00) | 27 (0.33) | 0.89      |      |

|       |             |                      |                   |         |          |                                       |           |      |
|-------|-------------|----------------------|-------------------|---------|----------|---------------------------------------|-----------|------|
| 11-02 | Gp4 Focus 1 | g.chr4:6302782C>G    | Silent            | WFS1    | p.P420P  | Wolfram syndrome 1 (w30 (0.00)        | 23 (0.22) | 0.58 |
| 11-02 | Gp4 Focus 1 | g.chr10:27405204C>T  | Missense Mutation | YME1L1  | p.S597N  | YME1-like 1 ATPase 34 (0.00)          | 33 (0.21) | 0.57 |
| 11-02 | Gp4 Focus 1 | g.chr3:28566036G>A   | Missense Mutation | ZCWPW2  | p.E310K  | zinc finger, CW type wi45 (0.00)      | 38 (0.18) | 0.49 |
| 11-02 | Gp4 Focus 1 | g.chr8:135596155G>A  | Missense Mutation | ZFAT    | p.T936I  | zinc finger and AT hook33 (0.00)      | 30 (0.17) | 0.44 |
| 11-02 | Gp4 Focus 1 | g.chrX:24228965C>A   | Missense Mutation | ZFX     | p.S630R  | zinc finger protein, X-liu19 (0.00)   | 12 (0.42) | 0.69 |
| 11-02 | Gp4 Focus 1 | g.chr15:56970932G>A  | Silent            | ZNF280D | p.Y351Y  | zinc finger protein 280E36 (0.00)     | 36 (0.19) | 0.52 |
| 11-02 | Gp4 Focus 1 | g.chr14:74376100T>A  | Missense Mutation | ZNF410  | p.S251T  | zinc finger protein 410 15 (0.00)     | 29 (0.17) | 0.46 |
| 11-02 | Gp4 Focus 1 | g.chr19:57839364C>T  | Silent            | ZNF543  | p.L178L  | zinc finger protein 543 25 (0.00)     | 28 (0.21) | 0.57 |
| 11-02 | Gp4 Focus 1 | g.chr7:149318673T>A  | RNA               | ZNF767  |          | 17 (0.00)                             | 30 (0.20) | 0.53 |
| 11-02 | Gp4 Focus 1 | g.chr7:149557613G>A  | Missense Mutation | ZNF862  | p.R455K  | zinc finger protein 862 20 (0.00)     | 32 (0.31) | 0.83 |
| 11-02 | Gp4 Focus 1 | g.chr10:75557813G>A  | Missense Mutation | ZSWIM8  | p.V1308I | zinc finger, SWIM-type 41 (0.02)      | 35 (0.34) | 0.91 |
| 11-02 | Gp4 Focus 2 | g.chr10:52603852G>A  | Missense Mutation | A1CF    | p.P44S   | APOBEC1 complement 38 (0.00)          | 15 (0.33) | 1.14 |
| 11-02 | Gp4 Focus 2 | g.chr12:9242999G>T   | Missense Mutation | A2M     | p.A850E  | alpha-2-macroglobulin 63 (0.02)       | 73 (0.53) | 1.42 |
| 11-02 | Gp4 Focus 2 | g.chr12:9268437C>T   | Silent            | A2M     | p.K3K    | alpha-2-macroglobulin 39 (0.00)       | 40 (0.20) | 0.53 |
| 11-02 | Gp4 Focus 2 | g.chr12:9001485G>A   | Missense Mutation | A2ML1   | p.G668D  | alpha-2-macroglobulin-l26 (0.00)      | 22 (0.32) | 0.85 |
| 11-02 | Gp4 Focus 2 | g.chr12:53701422G>A  | Missense Mutation | AAAS    | p.L498F  | achalasia, adrenocortica 32 (0.00)    | 12 (0.67) | 1.78 |
| 11-02 | Gp4 Focus 2 | g.chr12:53702550C>T  | Missense Mutation | AAAS    | p.G349E  | achalasia, adrenocortica 52 (0.00)    | 18 (0.33) | 0.89 |
| 11-02 | Gp4 Focus 2 | g.chr12:125587239G>T | Silent            | AACS    | p.R195R  | acetoacetyl-CoA synthetase 131 (0.00) | 30 (0.17) | 0.44 |
| 11-02 | Gp4 Focus 2 | g.chr5:178208048G>T  | RNA               | AACSP1  |          | acetoacetyl-CoA synthetase 26 (0.00)  | 28 (0.43) | 1.14 |
| 11-02 | Gp4 Focus 2 | g.chr17:35376342G>A  | Silent            | AATF    | p.L479L  | apoptosis antagonizing t37 (0.00)     | 29 (0.31) | 0.83 |
| 11-02 | Gp4 Focus 2 | g.chr9:107556725G>A  | Nonsense Mutation | ABCA1   | p.R1817* | ATP-binding cassette, s168 (0.00)     | 15 (0.47) | 1.24 |
| 11-02 | Gp4 Focus 2 | g.chr17:67149460C>A  | Silent            | ABCA10  | p.G1374G | ATP-binding cassette, s119 (0.00)     | 23 (0.26) | 0.70 |
| 11-02 | Gp4 Focus 2 | g.chr7:48287910G>T   | Missense Mutation | ABCA13  | p.W578C  | ATP-binding cassette, s162 (0.00)     | 29 (0.17) | 0.46 |
| 11-02 | Gp4 Focus 2 | g.chr7:48390297G>A   | Missense Mutation | ABCA13  | p.G3421D | ATP-binding cassette, s143 (0.00)     | 45 (0.16) | 0.41 |
| 11-02 | Gp4 Focus 2 | g.chr7:48634306G>A   | Splice Site       | ABCA13  | p.D4881N | ATP-binding cassette, s144 (0.00)     | 21 (0.24) | 0.63 |
| 11-02 | Gp4 Focus 2 | g.chr16:2373669G>A   | Silent            | ABCA3   | p.F156F  | ATP-binding cassette, s170 (0.00)     | 18 (0.67) | 2.13 |
| 11-02 | Gp4 Focus 2 | g.chr1:94528783C>T   | Missense Mutation | ABCA4   | p.A549T  | ATP-binding cassette, s142 (0.00)     | 54 (0.17) | 0.44 |
| 11-02 | Gp4 Focus 2 | g.chr19:1046289C>T   | Silent            | ABCA7   | p.G364G  | ATP-binding cassette, s118 (0.00)     | 42 (0.17) | 0.44 |
| 11-02 | Gp4 Focus 2 | g.chr17:66873690C>G  | Missense Mutation | ABCA8   | p.R1390T | ATP-binding cassette, s132 (0.00)     | 29 (0.34) | 0.92 |
| 11-02 | Gp4 Focus 2 | g.chr1:229676409G>A  | Missense Mutation | ABCB10  | p.H383Y  | ATP-binding cassette, s144 (0.00)     | 33 (0.42) | 1.13 |
| 11-02 | Gp4 Focus 2 | g.chr7:150730897G>A  | Missense Mutation | ABCB8   | p.A101T  | ATP-binding cassette, s117 (0.00)     | 17 (0.29) | 0.78 |
| 11-02 | Gp4 Focus 2 | g.chr16:16225750C>T  | Silent            | ABCC1   | p.F1308F | ATP-binding cassette, s124 (0.00)     | 25 (0.32) | 0.85 |
| 11-02 | Gp4 Focus 2 | g.chr3:183700654G>A  | Nonsense Mutation | ABCC5   | p.R245*  | ATP-binding cassette, s183 (0.00)     | 56 (0.25) | 0.67 |
| 11-02 | Gp4 Focus 2 | g.chr3:183707156C>T  | Missense Mutation | ABCC5   | p.A49T   | ATP-binding cassette, s175 (0.00)     | 62 (0.16) | 0.43 |
| 11-02 | Gp4 Focus 2 | g.chr16:16295867C>A  | Silent            | ABCC6   | p.V389V  | ATP-binding cassette, s121 (0.00)     | 31 (0.16) | 0.43 |

|       |             |                      |                   |             |          |                                     |            |      |
|-------|-------------|----------------------|-------------------|-------------|----------|-------------------------------------|------------|------|
| 11-02 | Gp4 Focus 2 | g.chr12:21968812G>A  | Missense Mutation | ABCC9       | p.P1303L | ATP-binding cassette, s124 (0.00)   | 28 (0.18)  | 0.48 |
| 11-02 | Gp4 Focus 2 | g.chr14:74766254G>A  | Silent            | ABCD4       | p.S94S   | ATP-binding cassette, s141 (0.02)   | 17 (0.94)  | 2.51 |
| 11-02 | Gp4 Focus 2 | g.chr7:150923413C>T  | Silent            | ABCF2       | p.E44E   | ATP-binding cassette, s150 (0.00)   | 14 (0.43)  | 1.14 |
| 11-02 | Gp4 Focus 2 | g.chr11:119030937G>A | Splice Site       | ABCG4       | p.V480M  | ATP-binding cassette, s116 (0.00)   | 32 (0.41)  | 1.08 |
| 11-02 | Gp4 Focus 2 | g.chr1:179078022G>A  | Nonsense Mutation | ABL2        | p.Q794*  | ABL proto-oncogene 2, 24 (0.00)     | 29 (0.17)  | 0.46 |
| 11-02 | Gp4 Focus 2 | g.chr1:179078412T>C  | Missense Mutation | ABL2        | p.T664A  | ABL proto-oncogene 2, 51 (0.00)     | 42 (0.19)  | 0.51 |
| 11-02 | Gp4 Focus 2 | g.chr5:148632387G>A  | Missense Mutation | ABLIM3      | p.R642K  | actin binding LIM prote 89 (0.00)   | 70 (0.16)  | 0.42 |
| 11-02 | Gp4 Focus 2 | g.chr17:1003973C>T   | Silent            | ABR         | p.V83V   | active BCR-related 41 (0.00)        | 28 (0.18)  | 0.48 |
| 11-02 | Gp4 Focus 2 | g.chr19:35898950G>A  | lincRNA           | AC002511.1  |          | 22 (0.00)                           | 106 (0.16) | 0.43 |
| 11-02 | Gp4 Focus 2 | g.chr16:20856031C>T  | Silent            | AC004381.6  | p.G600G  | 43 (0.00)                           | 33 (0.30)  | 0.81 |
| 11-02 | Gp4 Focus 2 | g.chr2:137302049G>A  | RNA               | AC010146.2  |          | 21 (0.00)                           | 23 (0.39)  | 1.27 |
| 11-02 | Gp4 Focus 2 | g.chr19:52096143C>G  | Missense Mutation | AC018755.1  | p.A179P  | 20 (0.00)                           | 17 (0.29)  | 0.78 |
| 11-02 | Gp4 Focus 2 | g.chr2:27930863C>T   | Missense Mutation | AC074091.13 | p.G57E   | 40 (0.00)                           | 11 (0.82)  | 2.18 |
| 11-02 | Gp4 Focus 2 | g.chr2:42119219C>T   | lincRNA           | AC104654.1  |          | 62 (0.00)                           | 46 (0.17)  | 0.46 |
| 11-02 | Gp4 Focus 2 | g.chr17:35536345G>A  | Silent            | ACACA       | p.S1608S | acetyl-CoA carboxylase 30 (0.00)    | 34 (0.15)  | 0.39 |
| 11-02 | Gp4 Focus 2 | g.chr12:109690936C>T | Silent            | ACACB       | p.I2006I | acetyl-CoA carboxylase 68 (0.00)    | 16 (0.50)  | 1.33 |
| 11-02 | Gp4 Focus 2 | g.chr1:76199278G>T   | Missense Mutation | ACADM       | p.G151W  | acyl-CoA dehydrogenas 67 (0.01)     | 53 (0.17)  | 0.55 |
| 11-02 | Gp4 Focus 2 | g.chr11:108017059G>A | Missense Mutation | ACAT1       | p.G379E  | acetyl-CoA acetyltransf 20 (0.00)   | 30 (0.50)  | 1.33 |
| 11-02 | Gp4 Focus 2 | g.chrX:15609867C>T   | Silent            | ACE2        | p.V184V  | angiotensin I converting 65 (0.00)  | 12 (0.67)  | 1.11 |
| 11-02 | Gp4 Focus 2 | g.chr5:80640738G>T   | Missense Mutation | ACOT12      | p.T299K  | acyl-CoA thioesterase 1.20 (0.00)   | 12 (0.42)  | 1.11 |
| 11-02 | Gp4 Focus 2 | g.chr5:80640745G>A   | Missense Mutation | ACOT12      | p.L297F  | acyl-CoA thioesterase 1.21 (0.00)   | 12 (0.58)  | 1.56 |
| 11-02 | Gp4 Focus 2 | g.chrX:108921282C>T  | Missense Mutation | ACSL4       | p.E289K  | acyl-CoA synthetase lor 38 (0.00)   | 23 (0.65)  | 1.45 |
| 11-02 | Gp4 Focus 2 | g.chr10:114169389G>A | Silent            | ACSL5       | p.L219L  | acyl-CoA synthetase lor 74 (0.00)   | 45 (0.22)  | 0.59 |
| 11-02 | Gp4 Focus 2 | g.chr15:35085674C>T  | Missense Mutation | ACTC1       | p.G76S   | actin, alpha, cardiac mu: 16 (0.00) | 22 (0.36)  | 0.97 |
| 11-02 | Gp4 Focus 2 | g.chr11:66322620C>T  | RNA               | ACTN3       |          | actinin, alpha 3 (gene/ps 36 (0.00) | 35 (0.14)  | 0.38 |
| 11-02 | Gp4 Focus 2 | g.chr11:66322686G>A  | RNA               | ACTN3       |          | actinin, alpha 3 (gene/ps 36 (0.00) | 27 (0.26)  | 0.69 |
| 11-02 | Gp4 Focus 2 | g.chr2:98277087G>A   | Missense Mutation | ACTR1B      | p.R46W   | ARP1 actin-related prot: 33 (0.00)  | 19 (0.42)  | 1.12 |
| 11-02 | Gp4 Focus 2 | g.chr12:52379070C>A  | Silent            | ACVR1B      | p.V306V  | activin A receptor, type 23 (0.00)  | 19 (0.47)  | 1.26 |
| 11-02 | Gp4 Focus 2 | g.chr10:127782564C>T | Missense Mutation | ADAM12      | p.A382T  | ADAM metallopeptidas 43 (0.00)      | 20 (0.25)  | 0.67 |
| 11-02 | Gp4 Focus 2 | g.chr8:39007387G>A   | Splice Site       | ADAM32      |          | ADAM metallopeptidas 41 (0.00)      | 31 (0.32)  | 1.04 |
| 11-02 | Gp4 Focus 2 | g.chr20:3655323C>T   | Missense Mutation | ADAM33      | p.S143N  | ADAM metallopeptidas 15 (0.00)      | 19 (0.42)  | 1.12 |
| 11-02 | Gp4 Focus 2 | g.chr5:33637704G>A   | Silent            | ADAMTS12    | p.H622H  | ADAM metallopeptidas 39 (0.00)      | 26 (0.27)  | 0.72 |
| 11-02 | Gp4 Focus 2 | g.chr5:33881274G>A   | Nonsense Mutation | ADAMTS12    | p.Q147*  | ADAM metallopeptidas 26 (0.00)      | 23 (0.22)  | 0.58 |
| 11-02 | Gp4 Focus 2 | g.chr11:130343350C>T | Silent            | ADAMTS15    | p.S829S  | ADAM metallopeptidas 24 (0.00)      | 39 (0.54)  | 1.44 |
| 11-02 | Gp4 Focus 2 | g.chr9:18681872A>G   | Silent            | ADAMTSL1    | p.G468G  | ADAMTS-like 1 57 (0.00)             | 33 (0.24)  | 0.79 |

|       |             |                      |                   |             |          |                           |           |           |      |
|-------|-------------|----------------------|-------------------|-------------|----------|---------------------------|-----------|-----------|------|
| 11-02 | Gp4 Focus 2 | g.chr1:150526041G>A  | Missense Mutation | ADAMTSL4    | p.E192K  | ADAMTS-like 4             | 24 (0.00) | 25 (0.44) | 1.17 |
| 11-02 | Gp4 Focus 2 | g.chr1:154575071G>A  | Missense Mutation | ADAR        | p.P16L   | adenosine deaminase, R    | 25 (0.00) | 21 (0.57) | 1.52 |
| 11-02 | Gp4 Focus 2 | g.chr16:75637023G>A  | Silent            | ADAT1       | p.L446L  | adenosine deaminase, tF   | 69 (0.00) | 18 (0.33) | 0.89 |
| 11-02 | Gp4 Focus 2 | g.chr1:33549690C>T   | Silent            | ADC         | p.L81L   |                           | 15 (0.00) | 19 (0.32) | 0.84 |
| 11-02 | Gp4 Focus 2 | g.chr7:45632412C>T   | Missense Mutation | ADCY1       | p.R7W    | adenylate cyclase 1 (bra  | 30 (0.00) | 23 (0.30) | 0.81 |
| 11-02 | Gp4 Focus 2 | g.chr7:45743303G>A   | Silent            | ADCY1       | p.E892E  | adenylate cyclase 1 (bra  | 26 (0.00) | 34 (0.18) | 0.47 |
| 11-02 | Gp4 Focus 2 | g.chr1:167815389G>A  | Silent            | ADCY10      | p.P850P  | adenylate cyclase 10 (so  | 64 (0.00) | 49 (0.41) | 1.09 |
| 11-02 | Gp4 Focus 2 | g.chr1:167825636G>A  | Silent            | ADCY10      | p.A646A  | adenylate cyclase 10 (so  | 95 (0.00) | 39 (0.23) | 0.62 |
| 11-02 | Gp4 Focus 2 | g.chr16:50346800G>A  | Splice Site       | ADCY7       |          | adenylate cyclase 7       | 19 (0.00) | 10 (0.60) | 1.60 |
| 11-02 | Gp4 Focus 2 | g.chr16:4016199G>A   | Silent            | ADCY9       | p.Y1213Y | adenylate cyclase 9       | 43 (0.00) | 27 (0.26) | 0.83 |
| 11-02 | Gp4 Focus 2 | g.chr10:111893340G>A | Silent            | ADD3        | p.L695L  | adducin 3 (gamma)         | 51 (0.00) | 14 (0.36) | 0.95 |
| 11-02 | Gp4 Focus 2 | g.chr6:146978046G>A  | Missense Mutation | ADGB        | p.C181Y  | androglobin               | 90 (0.00) | 20 (0.25) | 0.67 |
| 11-02 | Gp4 Focus 2 | g.chr6:147109689G>A  | Missense Mutation | ADGB        | p.G1494R | androglobin               | 18 (0.00) | 47 (0.32) | 0.85 |
| 11-02 | Gp4 Focus 2 | g.chr8:67359513G>A   | Missense Mutation | ADHFE1      | p.G189R  | alcohol dehydrogenase,    | 21 (0.00) | 24 (0.21) | 0.70 |
| 11-02 | Gp4 Focus 2 | g.chr17:10614457G>A  | Missense Mutation | ADPRM       | p.C342Y  | ADP-ribose/CDP-alcohol    | 46 (0.00) | 21 (0.24) | 0.63 |
| 11-02 | Gp4 Focus 2 | g.chr14:22935321G>A  | RNA               | AE000661.37 |          |                           | 22 (0.00) | 15 (0.53) | 0.78 |
| 11-02 | Gp4 Focus 2 | g.chr4:7840283G>A    | Nonsense Mutation | AFAP1       | p.Q232*  | actin filament associated | 44 (0.00) | 27 (0.48) | 1.28 |
| 11-02 | Gp4 Focus 2 | g.chr5:148680716C>T  | Missense Mutation | AFAP1L1     | p.R84W   | actin filament associated | 25 (0.00) | 19 (0.26) | 0.70 |
| 11-02 | Gp4 Focus 2 | g.chr5:148680717G>T  | Missense Mutation | AFAP1L1     | p.R84L   | actin filament associated | 25 (0.00) | 21 (0.24) | 0.63 |
| 11-02 | Gp4 Focus 2 | g.chr4:88026819C>T   | Silent            | AFF1        | p.D434D  | AF4/FMR2 family, men      | 38 (0.00) | 19 (0.32) | 0.84 |
| 11-02 | Gp4 Focus 2 | g.chrX:148048511G>A  | Missense Mutation | AFF2        | p.M1035I | AF4/FMR2 family, men      | 40 (0.00) | 33 (0.52) | 1.24 |
| 11-02 | Gp4 Focus 2 | g.chrX:148048557C>T  | Silent            | AFF2        | p.L1051L | AF4/FMR2 family, men      | 45 (0.00) | 37 (0.32) | 0.78 |
| 11-02 | Gp4 Focus 2 | g.chr2:100623274C>T  | Silent            | AFF3        | p.P231P  | AF4/FMR2 family, men      | 15 (0.00) | 30 (0.27) | 0.71 |
| 11-02 | Gp4 Focus 2 | g.chr12:58126632C>T  | Silent            | AGAP2       | p.Q560Q  | ArfGAP with GTPase do     | 89 (0.00) | 98 (0.20) | 0.54 |
| 11-02 | Gp4 Focus 2 | g.chr10:51464877C>T  | Missense Mutation | AGAP7       | p.G527R  |                           | 85 (0.00) | 89 (0.18) | 0.62 |
| 11-02 | Gp4 Focus 2 | g.chr2:27277641G>A   | Missense Mutation | AGBL5       | p.S232N  | ATP/GTP binding prote     | 74 (0.00) | 15 (0.60) | 1.60 |
| 11-02 | Gp4 Focus 2 | g.chr2:27278650C>T   | Missense Mutation | AGBL5       | p.H337Y  | ATP/GTP binding prote     | 39 (0.00) | 15 (0.40) | 1.07 |
| 11-02 | Gp4 Focus 2 | g.chr2:27278977G>A   | Missense Mutation | AGBL5       | p.G446R  | ATP/GTP binding prote     | 44 (0.00) | 25 (0.32) | 0.85 |
| 11-02 | Gp4 Focus 2 | g.chr2:27278978G>A   | Missense Mutation | AGBL5       | p.G446E  | ATP/GTP binding prote     | 44 (0.00) | 25 (0.32) | 0.85 |
| 11-02 | Gp4 Focus 2 | g.chr7:100146444G>A  | Splice Site       | AGFG2       |          | ArfGAP with FG repeat     | 35 (0.00) | 25 (0.24) | 0.64 |
| 11-02 | Gp4 Focus 2 | g.chr1:15904180C>T   | Splice Site       | AGMAT       | p.Q300Q  | agmatine ureohydrolase    | 15 (0.00) | 24 (0.25) | 0.67 |
| 11-02 | Gp4 Focus 2 | g.chr21:45391294G>A  | Silent            | AGPAT3      | p.L230L  | 1-acylglycerol-3-phosph   | 30 (0.00) | 34 (0.26) | 0.71 |
| 11-02 | Gp4 Focus 2 | g.chr21:45391320C>G  | Missense Mutation | AGPAT3      | p.S239C  | 1-acylglycerol-3-phosph   | 30 (0.00) | 35 (0.26) | 0.69 |
| 11-02 | Gp4 Focus 2 | g.chr1:27878234C>T   | Silent            | AHDC1       | p.L131L  | AT hook, DNA binding      | 18 (0.00) | 43 (0.21) | 0.56 |
| 11-02 | Gp4 Focus 2 | g.chr11:62299695C>T  | Missense Mutation | AHNAK       | p.D732N  | AHNAK nucleoprotein       | 74 (0.00) | 29 (0.76) | 2.02 |



|       |             |                      |                   |            |          |                         |            |           |      |
|-------|-------------|----------------------|-------------------|------------|----------|-------------------------|------------|-----------|------|
| 11-02 | Gp4 Focus 2 | g.chr6:143458032C>T  | Nonsense Mutation | AIG1       | p.R68*   | androgen-induced 1      | 26 (0.00)  | 59 (0.20) | 0.54 |
| 11-02 | Gp4 Focus 2 | g.chr9:135742312G>A  | Silent            | AK8        | p.P66P   | adenylate kinase 8      | 65 (0.00)  | 23 (0.30) | 0.81 |
| 11-02 | Gp4 Focus 2 | g.chr17:55183608G>C  | Missense Mutation | AKAP1      | p.E261D  | A kinase (PRKA) ancho   | 36 (0.00)  | 52 (0.17) | 0.46 |
| 11-02 | Gp4 Focus 2 | g.chr13:42874193G>A  | Silent            | AKAP11     | p.V437V  | A kinase (PRKA) ancho   | 115 (0.00) | 30 (0.17) | 0.44 |
| 11-02 | Gp4 Focus 2 | g.chr6:151671080G>A  | Silent            | AKAP12     | p.K518K  | A kinase (PRKA) ancho   | 76 (0.00)  | 51 (0.16) | 0.42 |
| 11-02 | Gp4 Focus 2 | g.chr6:151671324G>A  | Missense Mutation | AKAP12     | p.G600R  | A kinase (PRKA) ancho   | 26 (0.00)  | 30 (0.17) | 0.44 |
| 11-02 | Gp4 Focus 2 | g.chr6:151671960C>A  | Missense Mutation | AKAP12     | p.P812T  | A kinase (PRKA) ancho   | 16 (0.00)  | 36 (0.19) | 0.52 |
| 11-02 | Gp4 Focus 2 | g.chr15:86064707G>A  | Missense Mutation | AKAP13     | p.D28N   | A kinase (PRKA) ancho   | 122 (0.00) | 18 (0.28) | 0.74 |
| 11-02 | Gp4 Focus 2 | g.chr15:86236651C>T  | Silent            | AKAP13     | p.P1815P | A kinase (PRKA) ancho   | 75 (0.00)  | 25 (0.20) | 0.53 |
| 11-02 | Gp4 Focus 2 | g.chr15:86261244G>A  | Missense Mutation | AKAP13     | p.G1956D | A kinase (PRKA) ancho   | 16 (0.00)  | 19 (0.32) | 0.84 |
| 11-02 | Gp4 Focus 2 | g.chrX:49957830G>A   | Nonsense Mutation | AKAP4      | p.Q503*  | A kinase (PRKA) ancho   | 29 (0.00)  | 20 (0.75) | 1.25 |
| 11-02 | Gp4 Focus 2 | g.chr14:33014554C>T  | Missense Mutation | AKAP6      | p.P232L  | A kinase (PRKA) ancho   | 35 (0.00)  | 10 (0.50) | 1.59 |
| 11-02 | Gp4 Focus 2 | g.chr1:109380197G>C  | Missense Mutation | AKNAD1     | p.S504C  | AKNA domain containi    | 51 (0.00)  | 25 (0.28) | 0.59 |
| 11-02 | Gp4 Focus 2 | g.chr7:134222339C>T  | Missense Mutation | AKR1B10    | p.P223S  | aldo-keto reductase fam | 81 (0.00)  | 35 (0.54) | 1.45 |
| 11-02 | Gp4 Focus 2 | g.chr7:134223018G>A  | Missense Mutation | AKR1B10    | p.E272K  | aldo-keto reductase fam | 43 (0.00)  | 33 (0.64) | 1.70 |
| 11-02 | Gp4 Focus 2 | g.chr10:5248246G>A   | Silent            | AKR1C4     | p.E152E  | aldo-keto reductase fam | 37 (0.00)  | 42 (0.14) | 0.38 |
| 11-02 | Gp4 Focus 2 | g.chr10:5204933G>A   | Silent            | AKR1CL1    | p.G48G   | aldo-keto reductase fam | 18 (0.00)  | 17 (0.53) | 1.41 |
| 11-02 | Gp4 Focus 2 | g.chr10:82013150T>A  | Missense Mutation | AL359195.1 | p.L223Q  |                         | 125 (0.00) | 60 (0.30) | 0.80 |
| 11-02 | Gp4 Focus 2 | g.chr9:116151267G>A  | Silent            | ALAD       | p.F307F  | aminolevulinate dehydr  | 24 (0.00)  | 17 (0.59) | 1.57 |
| 11-02 | Gp4 Focus 2 | g.chr3:52246391G>A   | Missense Mutation | ALAS1      | p.A573T  | aminolevulinate, delta- | 133 (0.00) | 32 (0.16) | 0.42 |
| 11-02 | Gp4 Focus 2 | g.chr3:52246414C>T   | Silent            | ALAS1      | p.P580P  | aminolevulinate, delta- | 128 (0.00) | 29 (0.17) | 0.46 |
| 11-02 | Gp4 Focus 2 | g.chr10:97373840G>A  | Nonsense Mutation | ALDH18A1   | p.Q562*  | aldehyde dehydrogenase  | 141 (0.00) | 26 (0.69) | 1.85 |
| 11-02 | Gp4 Focus 2 | g.chr12:105420419G>A | Silent            | ALDH1L2    | p.L874L  | aldehyde dehydrogenase  | 80 (0.00)  | 30 (0.27) | 0.71 |
| 11-02 | Gp4 Focus 2 | g.chr6:24532405G>A   | Splice Site       | ALDH5A1    | p.G440S  | aldehyde dehydrogenase  | 18 (0.00)  | 13 (0.38) | 1.03 |
| 11-02 | Gp4 Focus 2 | g.chr12:34175670C>T  | Nonsense Mutation | ALG10      | p.Q46*   | ALG10, alpha-1,2-gluc   | 72 (0.00)  | 47 (0.19) | 0.51 |
| 11-02 | Gp4 Focus 2 | g.chr13:52593231G>A  | Missense Mutation | ALG11      | p.G76E   | ALG11, alpha-1,2-man    | 27 (0.00)  | 22 (0.36) | 0.97 |
| 11-02 | Gp4 Focus 2 | g.chr9:101980475G>A  | Missense Mutation | ALG2       | p.P331L  | ALG2, alpha-1,3/1,6-m   | 17 (0.00)  | 11 (0.64) | 1.70 |
| 11-02 | Gp4 Focus 2 | g.chr17:4535299G>T   | Missense Mutation | ALOX15     | p.P565Q  | arachidonate 15-lipoxy  | 21 (0.00)  | 32 (0.19) | 0.50 |
| 11-02 | Gp4 Focus 2 | g.chr17:4535314G>A   | Missense Mutation | ALOX15     | p.T560M  | arachidonate 15-lipoxy  | 21 (0.00)  | 30 (0.43) | 1.16 |
| 11-02 | Gp4 Focus 2 | g.chr4:113353055G>A  | Nonsense Mutation | ALPK1      | p.W784*  | alpha-kinase 1          | 26 (0.00)  | 36 (0.33) | 0.89 |
| 11-02 | Gp4 Focus 2 | g.chr18:56203756C>T  | Silent            | ALPK2      | p.E1221E | alpha-kinase 2          | 27 (0.00)  | 24 (0.38) | 1.00 |
| 11-02 | Gp4 Focus 2 | g.chr18:56247511G>A  | Missense Mutation | ALPK2      | p.S166F  | alpha-kinase 2          | 30 (0.00)  | 22 (0.27) | 0.73 |
| 11-02 | Gp4 Focus 2 | g.chr2:202352505G>C  | Missense Mutation | ALS2CR11   | p.H1765D | amyotrophic lateral scl | 61 (0.00)  | 26 (0.38) | 1.03 |
| 11-02 | Gp4 Focus 2 | g.chr11:46439499C>T  | Missense Mutation | AMBRA1     | p.G937D  | autophagy/beclin-1 regu | 32 (0.00)  | 25 (0.20) | 0.53 |
| 11-02 | Gp4 Focus 2 | g.chr11:46439580G>A  | Missense Mutation | AMBRA1     | p.P910L  | autophagy/beclin-1 regu | 23 (0.00)  | 14 (0.43) | 1.14 |

|       |             |                      |                   |             |          |                           |             |           |      |
|-------|-------------|----------------------|-------------------|-------------|----------|---------------------------|-------------|-----------|------|
| 11-02 | Gp4 Focus 2 | g.chr11:46563529G>A  | Missense Mutation | AMBRA1      | p.P590S  | autophagy/beclin-1 regu   | 51 (0.00)   | 29 (0.17) | 0.46 |
| 11-02 | Gp4 Focus 2 | g.chr1:110051092G>A  | Missense Mutation | AMIGO1      | p.A148V  | adhesion molecule with    | 63 (0.00)   | 20 (0.30) | 0.63 |
| 11-02 | Gp4 Focus 2 | g.chr1:110172901C>T  | Missense Mutation | AMPD2       | p.A731V  | adenosine monophosphæ     | 15 (0.00)   | 18 (0.50) | 1.04 |
| 11-02 | Gp4 Focus 2 | g.chr19:10203301C>T  | Silent            | ANGPTL6     | p.R459R  | angiopoietin-like 6       | 16 (0.00)   | 10 (0.50) | 1.33 |
| 11-02 | Gp4 Focus 2 | g.chr4:114276396G>A  | Missense Mutation | ANK2        | p.E2175K | ankyrin 2, neuronal       | 53 (0.00)   | 28 (0.36) | 0.95 |
| 11-02 | Gp4 Focus 2 | g.chr10:61828490G>T  | Missense Mutation | ANK3        | p.T4050K | ankyrin 3, node of Ranv   | 69 (0.00)   | 27 (0.48) | 1.53 |
| 11-02 | Gp4 Focus 2 | g.chr10:61835537G>A  | Missense Mutation | ANK3        | p.S1701L | ankyrin 3, node of Ranv   | 38 (0.00)   | 18 (0.33) | 1.06 |
| 11-02 | Gp4 Focus 2 | g.chr5:139908840T>C  | Silent            | ANKHD1      | p.A2103A | ankyrin repeat and KH c   | 156 (0.00)  | 51 (0.31) | 0.84 |
| 11-02 | Gp4 Focus 2 | g.chr12:133304659C>T | Nonsense Mutation | ANKLE2      | p.W213*  | ankyrin repeat and LEM    | 30 (0.00)   | 42 (0.14) | 0.38 |
| 11-02 | Gp4 Focus 2 | g.chr18:9257478T>A   | Missense Mutation | ANKRD12     | p.L1405I | ankyrin repeat domain     | 144 (0.00)  | 30 (0.20) | 0.53 |
| 11-02 | Gp4 Focus 2 | g.chr12:110461909G>A | Missense Mutation | ANKRD13A    | p.E265K  | ankyrin repeat domain     | 186 (0.00)  | 66 (0.17) | 0.44 |
| 11-02 | Gp4 Focus 2 | g.chr12:110474073C>T | Missense Mutation | ANKRD13A    | p.S506L  | ankyrin repeat domain     | 126 (0.00)  | 71 (0.14) | 0.38 |
| 11-02 | Gp4 Focus 2 | g.chr18:21218832G>A  | Missense Mutation | ANKRD29     | p.S104F  | ankyrin repeat domain     | 233 (0.00)  | 16 (0.38) | 1.00 |
| 11-02 | Gp4 Focus 2 | g.chr18:14763706C>T  | Missense Mutation | ANKRD30B    | p.P281L  | ankyrin repeat domain     | 338 (0.00)  | 57 (0.32) | 0.84 |
| 11-02 | Gp4 Focus 2 | g.chr2:132905780G>A  | Missense Mutation | ANKRD30BL   | p.P234L  | ankyrin repeat domain     | 3148 (0.00) | 63 (0.30) | 0.97 |
| 11-02 | Gp4 Focus 2 | g.chr5:79854638G>A   | Missense Mutation | ANKRD34B    | p.P401S  | ankyrin repeat domain     | 318 (0.00)  | 36 (0.17) | 0.44 |
| 11-02 | Gp4 Focus 2 | g.chr1:145562313G>A  | Silent            | ANKRD35     | p.Q667Q  | ankyrin repeat domain     | 341 (0.00)  | 22 (0.32) | 0.85 |
| 11-02 | Gp4 Focus 2 | g.chr2:197878295G>A  | Nonsense Mutation | ANKRD44     | p.Q597*  | ankyrin repeat domain     | 417 (0.00)  | 27 (0.67) | 1.78 |
| 11-02 | Gp4 Focus 2 | g.chr12:56639375C>T  | Silent            | ANKRD52     | p.V730V  | ankyrin repeat domain     | 540 (0.00)  | 16 (0.38) | 1.00 |
| 11-02 | Gp4 Focus 2 | g.chr3:149508622C>A  | Missense Mutation | ANKUB1      | p.W60C   | ankyrin repeat and ubiq   | 29 (0.00)   | 22 (0.27) | 0.73 |
| 11-02 | Gp4 Focus 2 | g.chr2:220098476G>A  | Missense Mutation | ANKZF1      | p.A287T  | ankyrin repeat and zinc   | 37 (0.00)   | 72 (0.17) | 0.44 |
| 11-02 | Gp4 Focus 2 | g.chr11:26677997C>T  | Missense Mutation | ANO3        | p.A911V  | anoctamin 3               | 85 (0.00)   | 27 (0.26) | 0.69 |
| 11-02 | Gp4 Focus 2 | g.chr11:22257740G>A  | Missense Mutation | ANO5        | p.G227D  | anoctamin 5               | 79 (0.00)   | 44 (0.32) | 0.85 |
| 11-02 | Gp4 Focus 2 | g.chr15:90340813G>A  | Missense Mutation | ANPEP       | p.P717L  | alanyl (membrane) amir    | 22 (0.00)   | 15 (0.40) | 1.07 |
| 11-02 | Gp4 Focus 2 | g.chr10:47663357G>A  | Silent            | ANTXRL      | p.R104R  | anthrax toxin receptor-li | 63 (0.00)   | 40 (0.17) | 0.47 |
| 11-02 | Gp4 Focus 2 | g.chr10:47681713C>A  | Missense Mutation | ANTXRL      | p.P384Q  | anthrax toxin receptor-li | 42 (0.00)   | 39 (0.28) | 0.75 |
| 11-02 | Gp4 Focus 2 | g.chr5:150496725C>A  | Missense Mutation | ANXA6       | p.G512V  | annexin A6                | 23 (0.00)   | 12 (0.42) | 1.11 |
| 11-02 | Gp4 Focus 2 | g.chr5:150502506C>T  | Missense Mutation | ANXA6       | p.R402Q  | annexin A6                | 33 (0.00)   | 48 (0.17) | 0.44 |
| 11-02 | Gp4 Focus 2 | g.chr1:150967088C>T  | Silent            | ANXA9       | p.I296I  | annexin A9                | 71 (0.00)   | 31 (0.29) | 0.77 |
| 11-02 | Gp4 Focus 2 | g.chr7:150558050C>A  | Missense Mutation | AOC1        | p.T670K  | amine oxidase, copper c   | 23 (0.00)   | 10 (0.60) | 1.60 |
| 11-02 | Gp4 Focus 2 | g.chr17:40996887G>A  | Missense Mutation | AOC2        | p.A82T   | amine oxidase, copper c   | 29 (0.00)   | 27 (0.67) | 1.78 |
| 11-02 | Gp4 Focus 2 | g.chr11:125366566G>A | Silent            | AP000708.1  | p.E150E  |                           | 36 (0.00)   | 76 (0.16) | 0.42 |
| 11-02 | Gp4 Focus 2 | g.chr11:64942967C>T  | RNA               | AP003068.18 |          |                           | 20 (0.00)   | 34 (0.15) | 0.39 |
| 11-02 | Gp4 Focus 2 | g.chr21:11181022C>T  | lincRNA           | AP003900.6  |          |                           | 108 (0.00)  | 47 (0.17) | 0.45 |
| 11-02 | Gp4 Focus 2 | g.chr14:24032982G>A  | Missense Mutation | AP1G2       | p.S392F  | adaptor-related protein c | 17 (0.00)   | 16 (0.31) | 0.46 |

|       |             |                      |                   |            |          |                                    |            |      |
|-------|-------------|----------------------|-------------------|------------|----------|------------------------------------|------------|------|
| 11-02 | Gp4 Focus 2 | g.chr5:77311260G>A   | Silent            | AP3B1      | p.V986V  | adaptor-related protein c32 (0.00) | 14 (0.36)  | 0.95 |
| 11-02 | Gp4 Focus 2 | g.chr12:99043339G>T  | Missense Mutation | APAF1      | p.A135S  | apoptotic peptidase activ33 (0.00) | 52 (0.21)  | 0.56 |
| 11-02 | Gp4 Focus 2 | g.chr9:72130963G>A   | Silent            | APBA1      | p.T388T  | amyloid beta (A4) precu16 (0.00)   | 16 (0.38)  | 1.21 |
| 11-02 | Gp4 Focus 2 | g.chr9:72130983G>A   | Missense Mutation | APBA1      | p.R382C  | amyloid beta (A4) precu17 (0.00)   | 21 (0.24)  | 0.77 |
| 11-02 | Gp4 Focus 2 | g.chr5:112175765G>A  | Missense Mutation | APC        | p.A1492T | adenomatous polyposis 34 (0.00)    | 23 (0.26)  | 0.70 |
| 11-02 | Gp4 Focus 2 | g.chr11:43345126G>A  | Silent            | API5       | p.S230S  | apoptosis inhibitor 5 86 (0.00)    | 120 (0.15) | 0.40 |
| 11-02 | Gp4 Focus 2 | g.chr1:10493933G>A   | Missense Mutation | APITD1-COR | p.C29Y   | APITD1-CORT readthr91 (0.00)       | 31 (0.19)  | 0.52 |
| 11-02 | Gp4 Focus 2 | g.chr19:36363386C>A  | Splice Site       | APLP1      | p.V284V  | amyloid beta (A4) precu26 (0.00)   | 10 (0.70)  | 1.87 |
| 11-02 | Gp4 Focus 2 | g.chr11:129979474G>A | Missense Mutation | APLP2      | p.E86K   | amyloid beta (A4) precu24 (0.00)   | 21 (0.24)  | 0.63 |
| 11-02 | Gp4 Focus 2 | g.chr2:21225608G>A   | Missense Mutation | APOB       | p.S4229F | apolipoprotein B 38 (0.00)         | 17 (0.35)  | 0.94 |
| 11-02 | Gp4 Focus 2 | g.chr2:21237399G>A   | Missense Mutation | APOB       | p.L1255F | apolipoprotein B 21 (0.00)         | 18 (0.28)  | 0.74 |
| 11-02 | Gp4 Focus 2 | g.chr2:21247907G>A   | Silent            | APOB       | p.R778R  | apolipoprotein B 27 (0.00)         | 29 (0.24)  | 0.64 |
| 11-02 | Gp4 Focus 2 | g.chr22:36122884G>A  | Missense Mutation | APOL5      | p.A257T  | apolipoprotein L, 5 64 (0.00)      | 34 (0.18)  | 0.47 |
| 11-02 | Gp4 Focus 2 | g.chr9:33442880G>C   | Missense Mutation | AQP3       | p.H154Q  | aquaporin 3 (Gill blood 43 (0.00)  | 41 (0.37)  | 0.98 |
| 11-02 | Gp4 Focus 2 | g.chr20:47606206C>T  | Silent            | ARFGEF2    | p.C933C  | ADP-ribosylation factor 35 (0.03)  | 20 (0.30)  | 0.80 |
| 11-02 | Gp4 Focus 2 | g.chr2:143913191G>A  | Missense Mutation | ARHGAP15   | p.M44I   | Rho GTPase activating j51 (0.00)   | 19 (0.32)  | 1.03 |
| 11-02 | Gp4 Focus 2 | g.chr16:24942661G>A  | Silent            | ARHGAP17   | p.G653G  | Rho GTPase activating j36 (0.00)   | 66 (0.36)  | 0.97 |
| 11-02 | Gp4 Focus 2 | g.chr10:24874012C>G  | Missense Mutation | ARHGAP21   | p.V1736L | Rho GTPase activating j43 (0.00)   | 11 (0.82)  | 2.74 |
| 11-02 | Gp4 Focus 2 | g.chr10:49654512C>A  | Missense Mutation | ARHGAP22   | p.L679F  | Rho GTPase activating j41 (0.00)   | 23 (0.35)  | 0.93 |
| 11-02 | Gp4 Focus 2 | g.chr10:49654513A>C  | Missense Mutation | ARHGAP22   | p.L679W  | Rho GTPase activating j42 (0.00)   | 23 (0.35)  | 0.93 |
| 11-02 | Gp4 Focus 2 | g.chr4:86863355G>A   | Silent            | ARHGAP24   | p.L176L  | Rho GTPase activating j25 (0.00)   | 24 (0.29)  | 0.78 |
| 11-02 | Gp4 Focus 2 | g.chr11:128851348G>A | Silent            | ARHGAP32   | p.F218F  | Rho GTPase activating j55 (0.00)   | 36 (0.33)  | 0.89 |
| 11-02 | Gp4 Focus 2 | g.chr19:47422027G>A  | Missense Mutation | ARHGAP35   | p.G32E   | Rho GTPase activating j22 (0.00)   | 14 (0.43)  | 1.14 |
| 11-02 | Gp4 Focus 2 | g.chr19:47423471C>T  | Silent            | ARHGAP35   | p.S513S  | Rho GTPase activating j115 (0.00)  | 20 (0.30)  | 0.80 |
| 11-02 | Gp4 Focus 2 | g.chr19:47423819T>A  | Missense Mutation | ARHGAP35   | p.D629E  | Rho GTPase activating j83 (0.00)   | 80 (0.16)  | 0.43 |
| 11-02 | Gp4 Focus 2 | g.chr17:12812227T>C  | Missense Mutation | ARHGAP44   | p.L71S   | Rho GTPase activating j39 (0.00)   | 22 (0.32)  | 0.85 |
| 11-02 | Gp4 Focus 2 | g.chr14:32561177C>A  | Missense Mutation | ARHGAP5    | p.F434L  | Rho GTPase activating j56 (0.00)   | 25 (0.20)  | 0.64 |
| 11-02 | Gp4 Focus 2 | g.chr8:1814752C>T    | Silent            | ARHGEF10   | p.N202N  | Rho guanine nucleotide 27 (0.00)   | 45 (0.18)  | 0.61 |
| 11-02 | Gp4 Focus 2 | g.chr1:17958906G>A   | Missense Mutation | ARHGEF10L  | p.E520K  | Rho guanine nucleotide 54 (0.00)   | 46 (0.52)  | 1.39 |
| 11-02 | Gp4 Focus 2 | g.chr11:120319897G>A | Missense Mutation | ARHGEF12   | p.R606K  | Rho guanine nucleotide 48 (0.00)   | 84 (0.18)  | 0.48 |
| 11-02 | Gp4 Focus 2 | g.chr1:155924736G>A  | Silent            | ARHGEF2    | p.P580P  | Rho/Rac guanine nuclec34 (0.00)    | 32 (0.34)  | 0.92 |
| 11-02 | Gp4 Focus 2 | g.chr4:106576795C>T  | Silent            | ARHGEF38   | p.D383D  | Rho guanine nucleotide 51 (0.02)   | 31 (0.65)  | 1.72 |
| 11-02 | Gp4 Focus 2 | g.chr9:35664399G>A   | Silent            | ARHGEF39   | p.A108A  | Rho guanine nucleotide 76 (0.00)   | 67 (0.19)  | 0.52 |
| 11-02 | Gp4 Focus 2 | g.chr7:144059783G>A  | Silent            | ARHGEF5    | p.Q7Q    | Rho guanine nucleotide 55 (0.00)   | 56 (0.23)  | 0.62 |
| 11-02 | Gp4 Focus 2 | g.chrX:135761812C>T  | Missense Mutation | ARHGEF6    | p.S571N  | Rac/Cdc42 guanine nuc44 (0.00)     | 16 (0.44)  | 1.05 |

|       |             |                      |                   |         |          |                                            |            |      |
|-------|-------------|----------------------|-------------------|---------|----------|--------------------------------------------|------------|------|
| 11-02 | Gp4 Focus 2 | g.chr1:27100200G>A   | Silent            | ARID1A  | p.Q1332Q | AT rich interactive dom 26 (0.00)          | 10 (0.70)  | 1.87 |
| 11-02 | Gp4 Focus 2 | g.chr6:157517318C>T  | Silent            | ARID1B  | p.P1294P | AT rich interactive dom 49 (0.00)          | 31 (0.19)  | 0.52 |
| 11-02 | Gp4 Focus 2 | g.chr10:63851682C>T  | Silent            | ARID5B  | p.P820P  | AT rich interactive dom 58 (0.00)          | 16 (0.50)  | 1.58 |
| 11-02 | Gp4 Focus 2 | g.chr11:30358308G>A  | Missense Mutation | ARL14EP | p.G250E  | ADP-ribosylation factor 47 (0.00)          | 22 (0.50)  | 1.33 |
| 11-02 | Gp4 Focus 2 | g.chr10:104436664G>A | Missense Mutation | ARL3    | p.A179V  | ADP-ribosylation factor 60 (0.00)          | 16 (0.69)  | 1.83 |
| 11-02 | Gp4 Focus 2 | g.chr11:13393712G>A  | Splice Site       | ARNTL   |          | aryl hydrocarbon receptor 48 (0.00)        | 26 (0.27)  | 0.72 |
| 11-02 | Gp4 Focus 2 | g.chr7:98951580G>T   | Silent            | ARPC1A  | p.T183T  | actin related protein 2/3 25 (0.00)        | 105 (0.16) | 0.43 |
| 11-02 | Gp4 Focus 2 | g.chr7:98951605G>A   | Missense Mutation | ARPC1A  | p.G192R  | actin related protein 2/3 27 (0.00)        | 95 (0.24)  | 0.65 |
| 11-02 | Gp4 Focus 2 | g.chr3:35833915C>T   | Silent            | ARPP21  | p.L692L  | cAMP-regulated phosphatase 26 (0.00)       | 27 (0.52)  | 1.38 |
| 11-02 | Gp4 Focus 2 | g.chr19:18121440C>T  | Missense Mutation | ARRDC2  | p.P358S  | arrestin domain containing 20 (0.00)       | 50 (0.16)  | 0.43 |
| 11-02 | Gp4 Focus 2 | g.chr19:4891474C>T   | Missense Mutation | ARRDC5  | p.V205I  | arrestin domain containing 20 (0.00)       | 30 (0.17)  | 0.44 |
| 11-02 | Gp4 Focus 2 | g.chr4:114899922C>T  | Silent            | ARSL    | p.K23K   | arylsulfatase family, member 28 (0.00)     | 32 (0.19)  | 0.50 |
| 11-02 | Gp4 Focus 2 | g.chr8:131130453C>T  | Missense Mutation | ASAP1   | p.A612T  | ArfGAP with SH3 domain 30 (0.00)           | 32 (0.25)  | 0.67 |
| 11-02 | Gp4 Focus 2 | g.chr2:239353226C>T  | Silent            | ASB1    | p.H145H  | ankyrin repeat and SOCS 22 (0.00)          | 16 (0.88)  | 2.33 |
| 11-02 | Gp4 Focus 2 | g.chrX:15307645C>A   | Silent            | ASB11   | p.V212V  | ankyrin repeat and SOCS 69 (0.00)          | 23 (0.30)  | 0.51 |
| 11-02 | Gp4 Focus 2 | g.chrX:15307752C>T   | Missense Mutation | ASB11   | p.E177K  | ankyrin repeat and SOCS 33 (0.00)          | 11 (0.64)  | 1.06 |
| 11-02 | Gp4 Focus 2 | g.chr3:57314442C>T   | Missense Mutation | ASB14   | p.G259R  | ankyrin repeat and SOCS 27 (0.00)          | 21 (0.29)  | 0.76 |
| 11-02 | Gp4 Focus 2 | g.chr7:123267265G>A  | Missense Mutation | ASB15   | p.G267R  | ankyrin repeat and SOCS 24 (0.00)          | 30 (0.60)  | 1.60 |
| 11-02 | Gp4 Focus 2 | g.chr1:155311727C>A  | Splice Site       | ASH1L   | p.S2820S | ash1 (absent, small, or h21) (0.00)        | 28 (0.18)  | 0.48 |
| 11-02 | Gp4 Focus 2 | g.chr2:220396616G>A  | Missense Mutation | ASIC4   | p.R367K  | acid-sensing (proton-gated) 41 (0.00)      | 20 (0.75)  | 2.00 |
| 11-02 | Gp4 Focus 2 | g.chr2:220396620G>A  | Silent            | ASIC4   | p.E368E  | acid-sensing (proton-gated) 42 (0.00)      | 22 (0.73)  | 1.94 |
| 11-02 | Gp4 Focus 2 | g.chr8:62438550G>A   | Missense Mutation | ASPH    | p.T629M  | aspartate beta-hydroxylase 48 (0.00)       | 10 (0.80)  | 2.70 |
| 11-02 | Gp4 Focus 2 | g.chr8:62438557G>A   | Nonsense Mutation | ASPH    | p.Q627*  | aspartate beta-hydroxylase 50 (0.00)       | 10 (0.50)  | 1.69 |
| 11-02 | Gp4 Focus 2 | g.chr20:31024141G>A  | Missense Mutation | ASXL1   | p.S1209N | additional sex combs like 15 (0.00)        | 20 (0.45)  | 1.20 |
| 11-02 | Gp4 Focus 2 | g.chr2:25965352C>A   | Missense Mutation | ASXL2   | p.S1285I | additional sex combs like 85 (0.00)        | 16 (0.38)  | 1.00 |
| 11-02 | Gp4 Focus 2 | g.chr2:25966253T>A   | Nonsense Mutation | ASXL2   | p.K985*  | additional sex combs like 59 (0.00)        | 44 (0.20)  | 0.55 |
| 11-02 | Gp4 Focus 2 | g.chr18:31325413G>A  | Silent            | ASXL3   | p.Q1867Q | additional sex combs like 97 (0.00)        | 108 (0.23) | 0.62 |
| 11-02 | Gp4 Focus 2 | g.chr2:24033352G>A   | Missense Mutation | ATAD2B  | p.T763I  | ATPase family, AAA domain 54 (0.00)        | 17 (0.47)  | 1.25 |
| 11-02 | Gp4 Focus 2 | g.chr2:24046218G>A   | Missense Mutation | ATAD2B  | p.P681S  | ATPase family, AAA domain 149 (0.00)       | 48 (0.21)  | 0.56 |
| 11-02 | Gp4 Focus 2 | g.chr1:212791491G>A  | Missense Mutation | ATF3    | p.R88K   | activating transcription factor 192 (0.00) | 87 (0.20)  | 0.52 |
| 11-02 | Gp4 Focus 2 | g.chr1:212791545A>T  | Missense Mutation | ATF3    | p.K106M  | activating transcription factor 110 (0.00) | 130 (0.19) | 0.51 |
| 11-02 | Gp4 Focus 2 | g.chr22:39918530C>T  | Silent            | ATF4    | p.L327L  | activating transcription factor 117 (0.00) | 40 (0.17)  | 0.47 |
| 11-02 | Gp4 Focus 2 | g.chr12:14577960G>A  | Missense Mutation | ATF7IP  | p.V371I  | activating transcription factor 119 (0.00) | 32 (0.41)  | 1.08 |
| 11-02 | Gp4 Focus 2 | g.chr2:234172683G>A  | Missense Mutation | ATG16L1 | p.D121N  | autophagy related 16-like 62 (0.00)        | 17 (0.29)  | 0.78 |
| 11-02 | Gp4 Focus 2 | g.chr14:96756882C>T  | Missense Mutation | ATG2B   | p.R1916Q | autophagy related 2B 43 (0.00)             | 11 (0.73)  | 1.94 |

|       |             |                      |                   |          |          |                                    |            |           |      |
|-------|-------------|----------------------|-------------------|----------|----------|------------------------------------|------------|-----------|------|
| 11-02 | Gp4 Focus 2 | g.chr3:11399930G>A   | Silent            | ATG7     | p.G441G  | autophagy related 7                | 46 (0.02)  | 42 (0.36) | 0.95 |
| 11-02 | Gp4 Focus 2 | g.chr14:51054659G>A  | Missense Mutation | ATL1     | p.D49N   | atlastin GTPase 1                  | 128 (0.00) | 57 (0.18) | 0.47 |
| 11-02 | Gp4 Focus 2 | g.chr4:94751049G>A   | Silent            | ATOH1    | p.Q324Q  | atonal homolog 1 (Dros)            | 33 (0.00)  | 25 (0.20) | 0.91 |
| 11-02 | Gp4 Focus 2 | g.chr15:25925382G>A  | Missense Mutation | ATP10A   | p.S1251F | ATPase, class V, type 10           | 24 (0.00)  | 59 (0.61) | 2.25 |
| 11-02 | Gp4 Focus 2 | g.chr15:25932949C>T  | Silent            | ATP10A   | p.V1064V | ATPase, class V, type 10           | 62 (0.00)  | 29 (0.21) | 0.76 |
| 11-02 | Gp4 Focus 2 | g.chr15:25940259C>T  | Missense Mutation | ATP10A   | p.C932Y  | ATPase, class V, type 10           | 17 (0.00)  | 41 (0.17) | 0.63 |
| 11-02 | Gp4 Focus 2 | g.chr5:160067493G>A  | Silent            | ATP10B   | p.I325I  | ATPase, class V, type 10           | 46 (0.00)  | 32 (0.28) | 0.75 |
| 11-02 | Gp4 Focus 2 | g.chr5:160067498G>A  | Missense Mutation | ATP10B   | p.L324F  | ATPase, class V, type 10           | 50 (0.00)  | 34 (0.26) | 0.71 |
| 11-02 | Gp4 Focus 2 | g.chr4:47574900C>T   | Silent            | ATP10D   | p.A1084A | ATPase, class V, type 10           | 105 (0.00) | 67 (0.19) | 0.52 |
| 11-02 | Gp4 Focus 2 | g.chr13:113473686C>T | Silent            | ATP11A   | p.T213T  | ATPase, class VI, type 15          | 6 (0.00)   | 27 (0.19) | 0.49 |
| 11-02 | Gp4 Focus 2 | g.chr13:113526074C>T | Missense Mutation | ATP11A   | p.T1006M | ATPase, class VI, type 13          | 7 (0.00)   | 21 (0.48) | 1.27 |
| 11-02 | Gp4 Focus 2 | g.chr13:25262583C>T  | Silent            | ATP12A   | p.L119L  | ATPase, H+/K+ transpo              | 109 (0.00) | 37 (0.49) | 1.30 |
| 11-02 | Gp4 Focus 2 | g.chr1:17314964C>T   | Missense Mutation | ATP13A2  | p.C872Y  | ATPase type 13A2                   | 18 (0.00)  | 24 (0.38) | 1.00 |
| 11-02 | Gp4 Focus 2 | g.chr1:116931599G>A  | Missense Mutation | ATP1A1   | p.E238K  | ATPase, Na+/K+ transp              | 36 (0.00)  | 33 (0.21) | 0.44 |
| 11-02 | Gp4 Focus 2 | g.chr1:160156114C>T  | Silent            | ATP1A4   | p.V1006V | ATPase, Na+/K+ transp              | 27 (0.00)  | 30 (0.23) | 0.62 |
| 11-02 | Gp4 Focus 2 | g.chrX:119509392G>A  | Missense Mutation | ATP1B4   | p.G243E  | ATPase, Na+/K+ transp              | 29 (0.00)  | 10 (0.60) | 1.34 |
| 11-02 | Gp4 Focus 2 | g.chr17:3839738G>A   | Silent            | ATP2A3   | p.L783L  | ATPase, Ca <sup>++</sup> transport | 15 (0.00)  | 40 (0.20) | 0.53 |
| 11-02 | Gp4 Focus 2 | g.chr1:203678448G>A  | Missense Mutation | ATP2B4   | p.G526D  | ATPase, Ca <sup>++</sup> transport | 20 (0.00)  | 24 (0.38) | 1.00 |
| 11-02 | Gp4 Focus 2 | g.chr18:43666355G>T  | Missense Mutation | ATP5A1   | p.Q428K  | ATP synthase, H+ trans             | 39 (0.00)  | 17 (0.35) | 0.94 |
| 11-02 | Gp4 Focus 2 | g.chr12:57032950G>A  | Missense Mutation | ATP5B    | p.H477Y  | ATP synthase, H+ trans             | 68 (0.01)  | 15 (0.40) | 1.07 |
| 11-02 | Gp4 Focus 2 | g.chr19:41939442G>A  | Splice Site       | ATP5SL   | p.L145F  | ATP5S-like                         | 47 (0.00)  | 31 (0.16) | 0.43 |
| 11-02 | Gp4 Focus 2 | g.chr5:81614028G>A   | Missense Mutation | ATP6AP1L | p.R195Q  | ATPase, H+ transportin             | 20 (0.00)  | 11 (0.45) | 1.21 |
| 11-02 | Gp4 Focus 2 | g.chr17:40673109C>T  | Missense Mutation | ATP6V0A1 | p.H830Y  | ATPase, H+ transportin             | 64 (0.00)  | 25 (0.44) | 1.17 |
| 11-02 | Gp4 Focus 2 | g.chr8:20067946G>A   | Missense Mutation | ATP6V1B2 | p.M127I  | ATPase, H+ transportin             | 30 (0.00)  | 28 (0.21) | 0.57 |
| 11-02 | Gp4 Focus 2 | g.chr8:20074759C>T   | Missense Mutation | ATP6V1B2 | p.S397L  | ATPase, H+ transportin             | 124 (0.00) | 22 (0.27) | 0.73 |
| 11-02 | Gp4 Focus 2 | g.chr18:55322513G>A  | Silent            | ATP8B1   | p.C948C  | ATPase, aminophospho               | 95 (0.00)  | 63 (0.19) | 0.51 |
| 11-02 | Gp4 Focus 2 | g.chr3:142242872G>C  | Nonsense Mutation | ATR      | p.S1372* | ATR serine/threonine ki            | 84 (0.00)  | 28 (0.29) | 0.76 |
| 11-02 | Gp4 Focus 2 | g.chr3:142268516C>T  | Splice Site       | ATR      |          | ATR serine/threonine ki            | 33 (0.00)  | 15 (0.60) | 1.60 |
| 11-02 | Gp4 Focus 2 | g.chr20:3543979C>T   | Silent            | ATRN     | p.C585C  | attractin                          | 70 (0.00)  | 21 (0.29) | 0.76 |
| 11-02 | Gp4 Focus 2 | g.chr10:116889297G>A | Splice Site       | ATRNL1   | p.G277S  | attractin-like 1                   | 21 (0.00)  | 10 (0.70) | 1.87 |
| 11-02 | Gp4 Focus 2 | g.chr12:111893913G>A | Nonsense Mutation | ATXN2    | p.Q957*  | ataxin 2                           | 61 (0.00)  | 31 (0.29) | 0.77 |
| 11-02 | Gp4 Focus 2 | g.chr1:110034200G>A  | Missense Mutation | ATXN7L2  | p.R672Q  | ataxin 7-like 2                    | 21 (0.00)  | 22 (0.36) | 0.76 |
| 11-02 | Gp4 Focus 2 | g.chr7:32598596G>A   | Missense Mutation | AVL9     | p.M245I  | AVL9 homolog (S. cere              | 34 (0.00)  | 21 (0.33) | 0.89 |
| 11-02 | Gp4 Focus 2 | g.chr7:32612981C>T   | Silent            | AVL9     | p.A507A  | AVL9 homolog (S. cere              | 38 (0.00)  | 43 (0.21) | 0.56 |
| 11-02 | Gp4 Focus 2 | g.chr16:396491G>A    | Missense Mutation | AXIN1    | p.P179S  | axin 1                             | 36 (0.00)  | 31 (0.19) | 0.62 |

|       |             |                      |                   |          |          |                                                  |            |           |      |
|-------|-------------|----------------------|-------------------|----------|----------|--------------------------------------------------|------------|-----------|------|
| 11-02 | Gp4 Focus 2 | g.chr8:103841576C>A  | Missense Mutation | AZIN1    | p.D387Y  | antizyme inhibitor 1                             | 144 (0.00) | 28 (0.32) | 1.10 |
| 11-02 | Gp4 Focus 2 | g.chr8:103841655C>A  | Missense Mutation | AZIN1    | p.E360D  | antizyme inhibitor 1                             | 132 (0.00) | 35 (0.43) | 1.47 |
| 11-02 | Gp4 Focus 2 | g.chr1:235647758G>A  | Silent            | B3GALNT2 | p.V145V  | beta-1,3-N-acetylgalactose 53                    | 53 (0.00)  | 31 (0.39) | 1.03 |
| 11-02 | Gp4 Focus 2 | g.chr21:41033194C>T  | Silent            | B3GALT5  | p.V236V  | UDP-Gal:betaGlcNAc transferase 15                | 15 (0.00)  | 15 (0.47) | 1.24 |
| 11-02 | Gp4 Focus 2 | g.chr11:66114330G>A  | Silent            | B3GNT1   | p.D229D  | UDP-GlcNAc:betaGalactose transferase 19          | 19 (0.00)  | 9 (0.56)  | 1.48 |
| 11-02 | Gp4 Focus 2 | g.chr2:62449667G>A   | Silent            | B3GNT2   | p.S104S  | UDP-GlcNAc:betaGalactose transferase 55          | 55 (0.00)  | 36 (0.61) | 1.63 |
| 11-02 | Gp4 Focus 2 | g.chr9:104125201G>A  | Missense Mutation | BAAT     | p.L256F  | bile acid CoA:amino acid transferase 54          | 54 (0.00)  | 18 (0.44) | 1.19 |
| 11-02 | Gp4 Focus 2 | g.chr11:117163836C>G | Missense Mutation | BACE1    | p.W258C  | beta-site APP-cleaving enzyme 53                 | 53 (0.00)  | 18 (0.56) | 1.48 |
| 11-02 | Gp4 Focus 2 | g.chr21:11098798G>C  | RNA               | BAGE2    |          | B melanoma antigen family 18                     | 18 (0.00)  | 42 (0.19) | 0.51 |
| 11-02 | Gp4 Focus 2 | g.chr6:69684670G>A   | Missense Mutation | BAI3     | p.C514Y  | brain-specific angiogenesis inhibitor 61         | 61 (0.00)  | 16 (0.31) | 0.83 |
| 11-02 | Gp4 Focus 2 | g.chr6:69944973G>A   | Missense Mutation | BAI3     | p.G886D  | brain-specific angiogenesis inhibitor 48         | 48 (0.00)  | 19 (0.58) | 1.54 |
| 11-02 | Gp4 Focus 2 | g.chr6:69944982G>A   | Missense Mutation | BAI3     | p.C889Y  | brain-specific angiogenesis inhibitor 50         | 50 (0.00)  | 18 (0.67) | 1.78 |
| 11-02 | Gp4 Focus 2 | g.chr10:28971092G>A  | Missense Mutation | BAMBI    | p.R182K  | BMP and activin membrane receptor type 42        | 42 (0.00)  | 14 (0.50) | 1.67 |
| 11-02 | Gp4 Focus 2 | g.chr10:28971177G>A  | Silent            | BAMBI    | p.K210K  | BMP and activin membrane receptor type 48        | 48 (0.00)  | 28 (0.43) | 1.43 |
| 11-02 | Gp4 Focus 2 | g.chr16:88068928G>A  | Splice Site       | BANP     |          | BTG3 associated nuclear protein 17               | 17 (0.00)  | 21 (0.33) | 0.89 |
| 11-02 | Gp4 Focus 2 | g.chr16:88068969G>A  | Missense Mutation | BANP     | p.G403E  | BTG3 associated nuclear protein 17               | 17 (0.00)  | 19 (0.58) | 1.54 |
| 11-02 | Gp4 Focus 2 | g.chr2:160287535G>A  | Missense Mutation | BAZ2B    | p.S678F  | bromodomain adjacent to zinc finger domain 30    | 30 (0.00)  | 15 (0.53) | 1.42 |
| 11-02 | Gp4 Focus 2 | g.chr2:160304816G>A  | Missense Mutation | BAZ2B    | p.H147Y  | bromodomain adjacent to zinc finger domain 81    | 81 (0.00)  | 41 (0.22) | 0.59 |
| 11-02 | Gp4 Focus 2 | g.chr2:160310275G>A  | Silent            | BAZ2B    | p.N61N   | bromodomain adjacent to zinc finger domain 31    | 31 (0.00)  | 30 (0.43) | 1.16 |
| 11-02 | Gp4 Focus 2 | g.chr20:52644957G>A  | Nonsense Mutation | BCAS1    | p.Q233*  | breast carcinoma amplification factor 96         | 96 (0.00)  | 75 (0.16) | 0.43 |
| 11-02 | Gp4 Focus 2 | g.chr17:59115400G>A  | Missense Mutation | BCAS3    | p.S653N  | breast carcinoma amplification factor 18         | 18 (0.00)  | 21 (0.43) | 1.14 |
| 11-02 | Gp4 Focus 2 | g.chr2:60687570C>T   | Missense Mutation | BCL11A   | p.R792Q  | B-cell CLL/lymphoma 11A                          | 119 (0.00) | 32 (0.16) | 0.42 |
| 11-02 | Gp4 Focus 2 | g.chr20:30309566C>T  | Silent            | BCL2L1   | p.V152V  | BCL2-like 1                                      | 96 (0.00)  | 32 (0.16) | 0.42 |
| 11-02 | Gp4 Focus 2 | g.chr20:30309609C>T  | Missense Mutation | BCL2L1   | p.G138D  | BCL2-like 1                                      | 97 (0.00)  | 28 (0.25) | 0.67 |
| 11-02 | Gp4 Focus 2 | g.chr7:72957901G>A   | Missense Mutation | BCL7B    | p.S81F   | B-cell CLL/lymphoma 7B                           | 724 (0.00) | 48 (0.92) | 3.96 |
| 11-02 | Gp4 Focus 2 | g.chr7:72957941G>A   | Nonsense Mutation | BCL7B    | p.R68*   | B-cell CLL/lymphoma 7B                           | 728 (0.00) | 46 (0.91) | 3.94 |
| 11-02 | Gp4 Focus 2 | g.chr16:14758797G>A  | Silent            | BFAR     | p.L218L  | bifunctional apoptosis regulator 20              | 20 (0.05)  | 24 (0.92) | 2.44 |
| 11-02 | Gp4 Focus 2 | g.chrX:102004037C>T  | Silent            | BHLHB9   | p.A38A   | basic helix-loop-helix domain containing 43      | 43 (0.00)  | 24 (0.58) | 1.30 |
| 11-02 | Gp4 Focus 2 | g.chr3:5024631G>A    | Missense Mutation | BHLHE40  | p.D165N  | basic helix-loop-helix family class 2 member 212 | 212 (0.00) | 66 (0.21) | 0.57 |
| 11-02 | Gp4 Focus 2 | g.chr10:60566869G>A  | Missense Mutation | BICC1    | p.R776K  | BicC family RNA binding domain 40                | 40 (0.00)  | 30 (0.17) | 0.53 |
| 11-02 | Gp4 Focus 2 | g.chr12:32490723G>A  | Missense Mutation | BICD1    | p.R848Q  | bicaudal D homolog 1                             | 127 (0.00) | 41 (0.15) | 0.39 |
| 11-02 | Gp4 Focus 2 | g.chr9:95480231C>A   | Splice Site       | BICD2    |          | bicaudal D homolog 2                             | 136 (0.00) | 44 (0.39) | 1.03 |
| 11-02 | Gp4 Focus 2 | g.chr2:32602748C>T   | Missense Mutation | BIRC6    | p.L140F  | baculoviral IAP repeat containing 102            | 102 (0.00) | 47 (0.21) | 0.57 |
| 11-02 | Gp4 Focus 2 | g.chr2:32707621C>A   | Nonsense Mutation | BIRC6    | p.S2556* | baculoviral IAP repeat containing 108            | 108 (0.00) | 61 (0.39) | 1.05 |
| 11-02 | Gp4 Focus 2 | g.chr2:32724768G>A   | Missense Mutation | BIRC6    | p.D2875N | baculoviral IAP repeat containing 85             | 85 (0.00)  | 51 (0.31) | 0.84 |

|       |             |                     |                   |        |          |                                     |            |      |
|-------|-------------|---------------------|-------------------|--------|----------|-------------------------------------|------------|------|
| 11-02 | Gp4 Focus 2 | g.chr15:91286883G>A | Intron            | BLM    |          | Bloom syndrome, RecQ28 (0.00)       | 21 (0.43)  | 1.14 |
| 11-02 | Gp4 Focus 2 | g.chr15:91304345C>T | Missense Mutation | BLM    | p.T581I  | Bloom syndrome, RecQ28 (0.00)       | 21 (0.24)  | 0.63 |
| 11-02 | Gp4 Focus 2 | g.chr15:91312735C>T | Missense Mutation | BLM    | p.P825L  | Bloom syndrome, RecQ54 (0.00)       | 14 (0.50)  | 1.33 |
| 11-02 | Gp4 Focus 2 | g.chr15:91321124C>T | Intron            | BLM    |          | Bloom syndrome, RecQ81 (0.01)       | 13 (0.38)  | 1.03 |
| 11-02 | Gp4 Focus 2 | g.chr15:91329297G>A | Intron            | BLM    |          | Bloom syndrome, RecQ24 (0.00)       | 19 (0.63)  | 1.68 |
| 11-02 | Gp4 Focus 2 | g.chr15:91330546A>G | Intron            | BLM    |          | Bloom syndrome, RecQ20 (0.00)       | 42 (0.19)  | 0.51 |
| 11-02 | Gp4 Focus 2 | g.chr15:91331342T>A | Intron            | BLM    |          | Bloom syndrome, RecQ64 (0.00)       | 33 (0.15)  | 0.40 |
| 11-02 | Gp4 Focus 2 | g.chr15:91332889C>T | Intron            | BLM    |          | Bloom syndrome, RecQ62 (0.00)       | 41 (0.22)  | 0.59 |
| 11-02 | Gp4 Focus 2 | g.chr15:91339401G>A | Intron            | BLM    |          | Bloom syndrome, RecQ34 (0.03)       | 26 (0.23)  | 0.62 |
| 11-02 | Gp4 Focus 2 | g.chr8:22037273C>T  | Missense Mutation | BMP1   | p.P298S  | bone morphogenetic pro 15 (0.00)    | 16 (0.31)  | 0.83 |
| 11-02 | Gp4 Focus 2 | g.chr8:22054840G>A  | Missense Mutation | BMP1   | p.E672K  | bone morphogenetic pro 38 (0.03)    | 29 (0.28)  | 0.74 |
| 11-02 | Gp4 Focus 2 | g.chr7:34125618G>A  | Silent            | BMPER  | p.K553K  | BMP binding endotheliε 40 (0.00)    | 37 (0.22)  | 0.58 |
| 11-02 | Gp4 Focus 2 | g.chr4:96036838C>T  | Silent            | BMPR1B | p.D83D   | bone morphogenetic pro 53 (0.02)    | 11 (0.45)  | 2.07 |
| 11-02 | Gp4 Focus 2 | g.chr2:203242233C>A | Silent            | BMPR2  | p.P12P   | bone morphogenetic pro 38 (0.00)    | 16 (0.38)  | 1.00 |
| 11-02 | Gp4 Focus 2 | g.chr4:13616127T>C  | Silent            | BOD1L1 | p.E289E  | bioorientation of chromo:91 (0.00)  | 16 (0.62)  | 1.67 |
| 11-02 | Gp4 Focus 2 | g.chr13:73321107G>A | Nonsense Mutation | BORA   | p.W447*  | bora, aurora kinase A ac45 (0.00)   | 27 (0.22)  | 0.59 |
| 11-02 | Gp4 Focus 2 | g.chr6:3137670G>A   | Missense Mutation | BPHL   | p.A186T  | biphenyl hydrolase-like 21 (0.00)   | 17 (0.94)  | 1.80 |
| 11-02 | Gp4 Focus 2 | g.chr7:140434455C>A | Missense Mutation | BRAF   | p.C748F  | B-Raf proto-oncogene, ε63 (0.00)    | 18 (0.28)  | 0.74 |
| 11-02 | Gp4 Focus 2 | g.chr17:41204517G>A | Intron            | BRCA1  |          | breast cancer 1, early on26 (0.00)  | 40 (0.30)  | 0.80 |
| 11-02 | Gp4 Focus 2 | g.chr17:41205419C>T | Intron            | BRCA1  |          | breast cancer 1, early on46 (0.00)  | 36 (0.17)  | 0.44 |
| 11-02 | Gp4 Focus 2 | g.chr17:41206235C>T | Intron            | BRCA1  |          | breast cancer 1, early on51 (0.00)  | 41 (0.24)  | 0.65 |
| 11-02 | Gp4 Focus 2 | g.chr17:41211669G>A | Intron            | BRCA1  |          | breast cancer 1, early on119 (0.00) | 59 (0.39)  | 1.04 |
| 11-02 | Gp4 Focus 2 | g.chr17:41261356C>A | Intron            | BRCA1  |          | breast cancer 1, early on35 (0.00)  | 32 (0.16)  | 0.42 |
| 11-02 | Gp4 Focus 2 | g.chr17:41276526C>T | Intron            | BRCA1  |          | breast cancer 1, early on69 (0.00)  | 22 (0.32)  | 0.85 |
| 11-02 | Gp4 Focus 2 | g.chr13:32913238C>T | Silent            | BRCA2  | p.T1582T | breast cancer 2, early on116 (0.00) | 49 (0.14)  | 0.38 |
| 11-02 | Gp4 Focus 2 | g.chr13:32928661G>A | Intron            | BRCA2  |          | breast cancer 2, early on221 (0.00) | 114 (0.21) | 0.56 |
| 11-02 | Gp4 Focus 2 | g.chr13:32934992C>G | Intron            | BRCA2  |          | breast cancer 2, early on56 (0.00)  | 49 (0.27)  | 0.71 |
| 11-02 | Gp4 Focus 2 | g.chr13:32955577C>T | Intron            | BRCA2  |          | breast cancer 2, early on94 (0.00)  | 50 (0.16)  | 0.43 |
| 11-02 | Gp4 Focus 2 | g.chr13:32955581G>C | Intron            | BRCA2  |          | breast cancer 2, early on116 (0.00) | 48 (0.15)  | 0.39 |
| 11-02 | Gp4 Focus 2 | g.chr13:32955729G>A | Intron            | BRCA2  |          | breast cancer 2, early on66 (0.00)  | 54 (0.31)  | 0.84 |
| 11-02 | Gp4 Focus 2 | g.chr13:32957813C>G | Intron            | BRCA2  |          | breast cancer 2, early on191 (0.00) | 60 (0.20)  | 0.53 |
| 11-02 | Gp4 Focus 2 | g.chr13:32959265T>A | Intron            | BRCA2  |          | breast cancer 2, early on33 (0.00)  | 19 (0.32)  | 0.84 |
| 11-02 | Gp4 Focus 2 | g.chr13:32970688C>T | Intron            | BRCA2  |          | breast cancer 2, early on34 (0.00)  | 30 (0.17)  | 0.44 |
| 11-02 | Gp4 Focus 2 | g.chr22:50187924G>A | Missense Mutation | BRD1   | p.P706L  | bromodomain containin:25 (0.00)     | 21 (0.24)  | 0.63 |
| 11-02 | Gp4 Focus 2 | g.chr19:15375539G>A | Silent            | BRD4   | p.T296T  | bromodomain containin:31 (0.00)     | 14 (0.50)  | 1.33 |

|       |             |                      |                   |            |          |                          |            |           |      |
|-------|-------------|----------------------|-------------------|------------|----------|--------------------------|------------|-----------|------|
| 11-02 | Gp4 Focus 2 | g.chr1:190067716C>T  | Missense Mutation | BRINP3     | p.G578D  | bone morphogenetic pro   | 67 (0.00)  | 21 (0.24) | 0.63 |
| 11-02 | Gp4 Focus 2 | g.chr14:93712538G>T  | Missense Mutation | BTBD7      | p.P739H  | BTB (POZ) domain con     | 53 (0.00)  | 37 (0.22) | 0.58 |
| 11-02 | Gp4 Focus 2 | g.chr3:15686557G>A   | Missense Mutation | BTD        | p.M400I  | biotinidase              | 78 (0.00)  | 35 (0.17) | 0.46 |
| 11-02 | Gp4 Focus 2 | g.chr3:15686650G>A   | Silent            | BTD        | p.E431E  | biotinidase              | 86 (0.00)  | 55 (0.15) | 0.39 |
| 11-02 | Gp4 Focus 2 | g.chr7:99015184G>A   | Missense Mutation | BUD31      | p.C88Y   | BUD31 homolog (S. cer    | 24 (0.00)  | 24 (0.25) | 0.67 |
| 11-02 | Gp4 Focus 2 | g.chr2:201680428G>A  | Missense Mutation | BZW1       | p.D94N   | basic leucine zipper and | 42 (0.00)  | 23 (0.43) | 1.16 |
| 11-02 | Gp4 Focus 2 | g.chr10:98742517C>A  | Missense Mutation | C10orf12   | p.A457E  | chromosome 10 open re    | 40 (0.00)  | 25 (0.44) | 1.17 |
| 11-02 | Gp4 Focus 2 | g.chr10:96954330A>C  | Missense Mutation | C10orf129  | p.T30P   |                          | 30 (0.00)  | 11 (0.64) | 1.70 |
| 11-02 | Gp4 Focus 2 | g.chr10:128193058G>A | Silent            | C10orf90   | p.D190D  | chromosome 10 open re    | 35 (0.00)  | 20 (0.25) | 0.67 |
| 11-02 | Gp4 Focus 2 | g.chr11:122774696G>A | Silent            | C11orf63   | p.K136K  | chromosome 11 open re    | 153 (0.01) | 28 (0.21) | 0.57 |
| 11-02 | Gp4 Focus 2 | g.chr14:91639667G>A  | Missense Mutation | C14orf159  | p.C159Y  | chromosome 14 open re    | 42 (0.00)  | 32 (0.22) | 0.58 |
| 11-02 | Gp4 Focus 2 | g.chr14:77294717G>A  | Missense Mutation | C14orf166B | p.V58M   |                          | 44 (0.00)  | 49 (0.55) | 1.47 |
| 11-02 | Gp4 Focus 2 | g.chr15:81429068G>A  | Missense Mutation | C15orf26   | p.R124K  | chromosome 15 open re    | 26 (0.00)  | 32 (0.22) | 0.58 |
| 11-02 | Gp4 Focus 2 | g.chr15:81440782A>T  | Missense Mutation | C15orf26   | p.R272W  | chromosome 15 open re    | 41 (0.00)  | 24 (0.50) | 1.33 |
| 11-02 | Gp4 Focus 2 | g.chr15:76467968C>T  | Nonsense Mutation | C15orf27   | p.Q241*  | chromosome 15 open re    | 33 (0.00)  | 50 (0.36) | 0.96 |
| 11-02 | Gp4 Focus 2 | g.chr15:76468010C>T  | Nonsense Mutation | C15orf27   | p.Q255*  | chromosome 15 open re    | 25 (0.00)  | 47 (0.40) | 1.08 |
| 11-02 | Gp4 Focus 2 | g.chr15:83677389G>A  | Missense Mutation | C15orf40   | p.P93S   | chromosome 15 open re    | 37 (0.00)  | 75 (0.16) | 0.43 |
| 11-02 | Gp4 Focus 2 | g.chr16:81094830G>A  | Missense Mutation | C16orf46   | p.P375L  | chromosome 16 open re    | 30 (0.00)  | 13 (0.85) | 2.26 |
| 11-02 | Gp4 Focus 2 | g.chr16:5106130G>A   | Silent            | C16orf89   | p.A229A  | chromosome 16 open re    | 16 (0.00)  | 17 (0.41) | 1.31 |
| 11-02 | Gp4 Focus 2 | g.chr17:7329134G>A   | Missense Mutation | C17orf74   | p.V43M   | chromosome 17 open re    | 57 (0.00)  | 81 (0.53) | 0.39 |
| 11-02 | Gp4 Focus 2 | g.chr1:162825045G>A  | Missense Mutation | C1orf110   | p.P140L  | chromosome 1 open rea    | 38 (0.00)  | 34 (0.38) | 1.02 |
| 11-02 | Gp4 Focus 2 | g.chr1:169821967G>A  | Missense Mutation | C1orf112   | p.E801K  | chromosome 1 open rea    | 27 (0.00)  | 62 (0.21) | 0.56 |
| 11-02 | Gp4 Focus 2 | g.chr1:154184802G>A  | Missense Mutation | C1orf43    | p.A187V  | chromosome 1 open rea    | 45 (0.00)  | 28 (0.39) | 1.05 |
| 11-02 | Gp4 Focus 2 | g.chr1:43240459A>C   | Missense Mutation | C1orf50    | p.I112L  | chromosome 1 open rea    | 26 (0.00)  | 12 (0.42) | 1.11 |
| 11-02 | Gp4 Focus 2 | g.chr1:150255948G>A  | Missense Mutation | C1orf51    | p.G91R   |                          | 52 (0.00)  | 29 (0.48) | 1.29 |
| 11-02 | Gp4 Focus 2 | g.chr1:150255972G>A  | Missense Mutation | C1orf51    | p.D99N   |                          | 44 (0.00)  | 31 (0.45) | 1.20 |
| 11-02 | Gp4 Focus 2 | g.chr12:7187919C>T   | Missense Mutation | C1R        | p.G627R  | complement component     | 31 (0.00)  | 58 (0.24) | 0.64 |
| 11-02 | Gp4 Focus 2 | g.chr20:56730598G>A  | Silent            | C20orf85   | p.P75P   | chromosome 20 open re    | 33 (0.00)  | 29 (0.48) | 1.29 |
| 11-02 | Gp4 Focus 2 | g.chr11:73785627C>T  | Missense Mutation | C2CD3      | p.G1541E | C2 calcium-dependent d   | 21 (0.00)  | 25 (0.56) | 1.49 |
| 11-02 | Gp4 Focus 2 | g.chr12:22659733C>T  | Silent            | C2CD5      | p.L353L  | C2 calcium-dependent d   | 42 (0.00)  | 14 (0.36) | 0.95 |
| 11-02 | Gp4 Focus 2 | g.chr2:20990039T>C   | Missense Mutation | C2orf43    | p.K92E   | chromosome 2 open rea    | 65 (0.00)  | 15 (0.60) | 1.60 |
| 11-02 | Gp4 Focus 2 | g.chr2:219232229C>T  | Silent            | C2orf62    | p.F303F  |                          | 15 (0.00)  | 14 (0.57) | 1.52 |
| 11-02 | Gp4 Focus 2 | g.chr2:29296826G>A   | Missense Mutation | C2orf71    | p.S101F  | chromosome 2 open rea    | 52 (0.00)  | 25 (0.20) | 0.53 |
| 11-02 | Gp4 Focus 2 | g.chr2:61390285G>A   | Missense Mutation | C2orf74    | p.R110K  | chromosome 2 open rea    | 50 (0.00)  | 47 (0.15) | 0.40 |
| 11-02 | Gp4 Focus 2 | g.chr2:74040957G>A   | Missense Mutation | C2orf78    | p.D151N  | chromosome 2 open rea    | 41 (0.00)  | 25 (0.24) | 0.64 |



|       |             |                     |                   |              |          |                          |            |           |      |
|-------|-------------|---------------------|-------------------|--------------|----------|--------------------------|------------|-----------|------|
| 11-02 | Gp4 Focus 2 | g.chr3:63805244G>A  | Missense Mutation | C3orf49      | p.G33S   | chromosome 3 open rea    | 77 (0.00)  | 26 (0.27) | 0.72 |
| 11-02 | Gp4 Focus 2 | g.chr4:113468528G>T | Silent            | C4orf21      | p.P1837P |                          | 56 (0.00)  | 16 (0.38) | 1.00 |
| 11-02 | Gp4 Focus 2 | g.chr4:120221552C>T | Missense Mutation | C4orf3       | p.D47N   | chromosome 4 open rea    | 90 (0.00)  | 11 (0.45) | 1.21 |
| 11-02 | Gp4 Focus 2 | g.chr5:37201778C>T  | Missense Mutation | C5orf42      | p.S1141N | chromosome 5 open rea    | 74 (0.00)  | 45 (0.20) | 0.53 |
| 11-02 | Gp4 Focus 2 | g.chr6:71298392G>A  | Missense Mutation | C6orf57      | p.D98N   | chromosome 6 open rea    | 37 (0.00)  | 36 (0.31) | 0.81 |
| 11-02 | Gp4 Focus 2 | g.chr5:40955556C>T  | Silent            | C7           | p.G387G  | complement component     | 37 (0.00)  | 33 (0.18) | 0.48 |
| 11-02 | Gp4 Focus 2 | g.chr7:40314158C>T  | Missense Mutation | C7orf10      | p.T215I  |                          | 95 (0.00)  | 42 (0.24) | 0.63 |
| 11-02 | Gp4 Focus 2 | g.chr7:25218798C>T  | Missense Mutation | C7orf31      | p.D44N   | chromosome 7 open rea    | 37 (0.00)  | 21 (0.24) | 0.63 |
| 11-02 | Gp4 Focus 2 | g.chr7:25218834G>A  | Missense Mutation | C7orf31      | p.P32S   | chromosome 7 open rea    | 38 (0.00)  | 24 (0.38) | 1.00 |
| 11-02 | Gp4 Focus 2 | g.chr7:139102412G>T | Missense Mutation | C7orf55-LUC7 | p.S313I  | C7orf55-LUC7L2 readt     | 32 (0.00)  | 43 (0.47) | 1.24 |
| 11-02 | Gp4 Focus 2 | g.chr8:67425811G>A  | Missense Mutation | C8orf46      | p.S106N  | chromosome 8 open rea    | 22 (0.00)  | 37 (0.86) | 2.92 |
| 11-02 | Gp4 Focus 2 | g.chr9:131591033C>T | Silent            | C9orf114     | p.A63A   | chromosome 9 open rea    | 37 (0.00)  | 42 (0.17) | 0.44 |
| 11-02 | Gp4 Focus 2 | g.chr9:35045543C>A  | Missense Mutation | C9orf131     | p.H973N  | chromosome 9 open rea    | 58 (0.00)  | 24 (0.33) | 0.89 |
| 11-02 | Gp4 Focus 2 | g.chr9:112969692C>A | Missense Mutation | C9orf152     | p.Q56H   | chromosome 9 open rea    | 36 (0.00)  | 24 (0.21) | 0.56 |
| 11-02 | Gp4 Focus 2 | g.chr9:100675734G>A | Missense Mutation | C9orf156     | p.H120Y  | chromosome 9 open rea    | 63 (0.00)  | 28 (0.21) | 0.57 |
| 11-02 | Gp4 Focus 2 | g.chr9:135374847G>T | Silent            | C9orf171     | p.V128V  | chromosome 9 open rea    | 23 (0.00)  | 45 (0.27) | 0.71 |
| 11-02 | Gp4 Focus 2 | g.chr9:136251423G>A | Missense Mutation | C9orf96      | p.R81Q   |                          | 16 (0.00)  | 35 (0.26) | 0.69 |
| 11-02 | Gp4 Focus 2 | g.chr15:63638858G>A | Silent            | CA12         | p.L53L   | carbonic anhydrase XII   | 19 (0.00)  | 15 (0.40) | 1.07 |
| 11-02 | Gp4 Focus 2 | g.chr8:86163129C>T  | Silent            | CA13         | p.S66S   | carbonic anhydrase XIII  | 39 (0.00)  | 84 (0.30) | 0.79 |
| 11-02 | Gp4 Focus 2 | g.chr13:49906103C>T | Missense Mutation | CAB39L       | p.E272K  | calcium binding protein  | 111 (0.00) | 56 (0.14) | 0.38 |
| 11-02 | Gp4 Focus 2 | g.chr13:49906160C>T | Missense Mutation | CAB39L       | p.E253K  | calcium binding protein  | 132 (0.00) | 50 (0.16) | 0.43 |
| 11-02 | Gp4 Focus 2 | g.chr22:24460559C>T | Missense Mutation | CABIN1       | p.T599I  | calcineurin binding prot | 30 (0.00)  | 26 (0.23) | 0.62 |
| 11-02 | Gp4 Focus 2 | g.chr22:24481018C>T | Silent            | CABIN1       | p.Y1009Y | calcineurin binding prot | 34 (0.00)  | 21 (0.62) | 1.65 |
| 11-02 | Gp4 Focus 2 | g.chr9:140952675G>A | Missense Mutation | CACNA1B      | p.M1427I | calcium channel, voltag  | 25 (0.00)  | 23 (0.48) | 1.28 |
| 11-02 | Gp4 Focus 2 | g.chr1:181548355A>T | Missense Mutation | CACNA1E      | p.N255I  | calcium channel, voltag  | 71 (0.00)  | 37 (0.24) | 0.65 |
| 11-02 | Gp4 Focus 2 | g.chr1:181620530C>G | Missense Mutation | CACNA1E      | p.I336M  | calcium channel, voltag  | 32 (0.00)  | 28 (0.36) | 0.95 |
| 11-02 | Gp4 Focus 2 | g.chr16:1255243G>A  | Missense Mutation | CACNA1H      | p.D861N  | calcium channel, voltag  | 18 (0.00)  | 12 (0.50) | 1.60 |
| 11-02 | Gp4 Focus 2 | g.chr1:201052384G>A | Silent            | CACNA1S      | p.V433V  | calcium channel, voltag  | 17 (0.00)  | 13 (0.54) | 1.44 |
| 11-02 | Gp4 Focus 2 | g.chr3:54871248G>A  | Silent            | CACNA2D3     | p.Q487Q  | calcium channel, voltag  | 85 (0.01)  | 47 (0.36) | 0.96 |
| 11-02 | Gp4 Focus 2 | g.chr2:152698482G>C | Missense Mutation | CACNB4       | p.L366V  | calcium channel, voltag  | 49 (0.00)  | 38 (0.18) | 0.60 |
| 11-02 | Gp4 Focus 2 | g.chr2:27454914G>A  | Missense Mutation | CAD          | p.V760M  | carbamoyl-phosphate sy   | 23 (0.00)  | 27 (0.26) | 0.69 |
| 11-02 | Gp4 Focus 2 | g.chr3:85029779G>A  | Intron            | CADM2        |          | cell adhesion molecule   | 246 (0.02) | 14 (0.36) | 0.95 |
| 11-02 | Gp4 Focus 2 | g.chr3:85041162A>T  | Intron            | CADM2        |          | cell adhesion molecule   | 236 (0.00) | 28 (0.21) | 0.57 |
| 11-02 | Gp4 Focus 2 | g.chr3:85057829C>T  | Intron            | CADM2        |          | cell adhesion molecule   | 215 (0.00) | 10 (0.50) | 1.33 |
| 11-02 | Gp4 Focus 2 | g.chr3:85087388G>A  | Intron            | CADM2        |          | cell adhesion molecule   | 279 (0.00) | 15 (0.33) | 0.89 |

|       |             |                    |        |       |                                    |           |      |
|-------|-------------|--------------------|--------|-------|------------------------------------|-----------|------|
| 11-02 | Gp4 Focus 2 | g.chr3:85091943G>A | Intron | CADM2 | cell adhesion molecule 285 (0.00)  | 45 (0.31) | 0.83 |
| 11-02 | Gp4 Focus 2 | g.chr3:85138125C>T | Intron | CADM2 | cell adhesion molecule 227 (0.00)  | 20 (0.40) | 1.07 |
| 11-02 | Gp4 Focus 2 | g.chr3:85157100A>G | Intron | CADM2 | cell adhesion molecule 231 (0.00)  | 29 (0.21) | 0.55 |
| 11-02 | Gp4 Focus 2 | g.chr3:85167665C>G | Intron | CADM2 | cell adhesion molecule 217 (0.00)  | 20 (0.40) | 1.07 |
| 11-02 | Gp4 Focus 2 | g.chr3:85200292T>A | Intron | CADM2 | cell adhesion molecule 258 (0.00)  | 33 (0.24) | 0.65 |
| 11-02 | Gp4 Focus 2 | g.chr3:85200320T>A | Intron | CADM2 | cell adhesion molecule 257 (0.00)  | 29 (0.28) | 0.74 |
| 11-02 | Gp4 Focus 2 | g.chr3:85208527G>A | Intron | CADM2 | cell adhesion molecule 273 (0.00)  | 47 (0.38) | 1.02 |
| 11-02 | Gp4 Focus 2 | g.chr3:85210758G>A | Intron | CADM2 | cell adhesion molecule 251 (0.00)  | 20 (0.45) | 1.20 |
| 11-02 | Gp4 Focus 2 | g.chr3:85218402C>A | Intron | CADM2 | cell adhesion molecule 225 (0.00)  | 51 (0.22) | 0.58 |
| 11-02 | Gp4 Focus 2 | g.chr3:85221908G>A | Intron | CADM2 | cell adhesion molecule 281 (0.00)  | 86 (0.38) | 1.02 |
| 11-02 | Gp4 Focus 2 | g.chr3:85280678G>A | Intron | CADM2 | cell adhesion molecule 238 (0.00)  | 31 (0.35) | 0.95 |
| 11-02 | Gp4 Focus 2 | g.chr3:85303162C>T | Intron | CADM2 | cell adhesion molecule 297 (0.01)  | 13 (0.46) | 1.23 |
| 11-02 | Gp4 Focus 2 | g.chr3:85322566G>A | Intron | CADM2 | cell adhesion molecule 271 (0.00)  | 22 (0.41) | 1.09 |
| 11-02 | Gp4 Focus 2 | g.chr3:85405513G>A | Intron | CADM2 | cell adhesion molecule 246 (0.00)  | 51 (0.22) | 0.58 |
| 11-02 | Gp4 Focus 2 | g.chr3:85479320G>A | Intron | CADM2 | cell adhesion molecule 258 (0.00)  | 33 (0.24) | 0.65 |
| 11-02 | Gp4 Focus 2 | g.chr3:85502142G>A | Intron | CADM2 | cell adhesion molecule 269 (0.00)  | 25 (0.64) | 1.71 |
| 11-02 | Gp4 Focus 2 | g.chr3:85576403C>T | Intron | CADM2 | cell adhesion molecule 245 (0.00)  | 35 (0.14) | 0.38 |
| 11-02 | Gp4 Focus 2 | g.chr3:85621587C>T | Intron | CADM2 | cell adhesion molecule 285 (0.00)  | 71 (0.61) | 1.62 |
| 11-02 | Gp4 Focus 2 | g.chr3:85637900G>A | Intron | CADM2 | cell adhesion molecule 248 (0.00)  | 22 (0.32) | 0.85 |
| 11-02 | Gp4 Focus 2 | g.chr3:85654758C>T | Intron | CADM2 | cell adhesion molecule 2119 (0.00) | 35 (0.23) | 0.61 |
| 11-02 | Gp4 Focus 2 | g.chr3:85683290G>A | Intron | CADM2 | cell adhesion molecule 265 (0.00)  | 24 (0.33) | 0.89 |
| 11-02 | Gp4 Focus 2 | g.chr3:85703576G>A | Intron | CADM2 | cell adhesion molecule 248 (0.00)  | 59 (0.36) | 0.95 |
| 11-02 | Gp4 Focus 2 | g.chr3:85711782C>T | Intron | CADM2 | cell adhesion molecule 287 (0.01)  | 20 (0.30) | 0.80 |
| 11-02 | Gp4 Focus 2 | g.chr3:85734331G>T | Intron | CADM2 | cell adhesion molecule 220 (0.00)  | 28 (0.57) | 1.52 |
| 11-02 | Gp4 Focus 2 | g.chr3:85742225T>C | Intron | CADM2 | cell adhesion molecule 219 (0.00)  | 36 (0.19) | 0.52 |
| 11-02 | Gp4 Focus 2 | g.chr3:85757172G>A | Intron | CADM2 | cell adhesion molecule 216 (0.00)  | 12 (0.67) | 1.78 |
| 11-02 | Gp4 Focus 2 | g.chr3:85759254C>A | Intron | CADM2 | cell adhesion molecule 2106 (0.00) | 29 (0.17) | 0.46 |
| 11-02 | Gp4 Focus 2 | g.chr3:85768810G>A | Intron | CADM2 | cell adhesion molecule 255 (0.00)  | 17 (0.29) | 0.78 |
| 11-02 | Gp4 Focus 2 | g.chr3:85781658G>A | Intron | CADM2 | cell adhesion molecule 230 (0.00)  | 29 (0.38) | 1.01 |
| 11-02 | Gp4 Focus 2 | g.chr3:85844614C>T | Intron | CADM2 | cell adhesion molecule 267 (0.00)  | 16 (0.44) | 1.17 |
| 11-02 | Gp4 Focus 2 | g.chr3:85855322G>A | Intron | CADM2 | cell adhesion molecule 242 (0.00)  | 44 (0.36) | 0.97 |
| 11-02 | Gp4 Focus 2 | g.chr3:85857528G>A | Intron | CADM2 | cell adhesion molecule 228 (0.00)  | 38 (0.53) | 1.40 |
| 11-02 | Gp4 Focus 2 | g.chr3:85857563C>T | Intron | CADM2 | cell adhesion molecule 236 (0.00)  | 38 (0.47) | 1.26 |
| 11-02 | Gp4 Focus 2 | g.chr3:85912686C>T | Intron | CADM2 | cell adhesion molecule 277 (0.00)  | 25 (0.28) | 0.75 |
| 11-02 | Gp4 Focus 2 | g.chr3:85914133C>T | Intron | CADM2 | cell adhesion molecule 242 (0.00)  | 46 (0.17) | 0.46 |

|       |             |                      |                   |          |          |                                                |            |           |      |
|-------|-------------|----------------------|-------------------|----------|----------|------------------------------------------------|------------|-----------|------|
| 11-02 | Gp4 Focus 2 | g.chr3:85939355G>A   | Intron            | CADM2    |          | cell adhesion molecule 253 (0.00)              | 35 (0.23)  | 0.61      |      |
| 11-02 | Gp4 Focus 2 | g.chr3:85939404G>A   | Intron            | CADM2    |          | cell adhesion molecule 256 (0.00)              | 35 (0.31)  | 0.84      |      |
| 11-02 | Gp4 Focus 2 | g.chr3:85939741G>A   | Intron            | CADM2    |          | cell adhesion molecule 244 (0.00)              | 17 (0.41)  | 1.10      |      |
| 11-02 | Gp4 Focus 2 | g.chr3:86018187C>T   | Intron            | CADM2    |          | cell adhesion molecule 2148 (0.00)             | 63 (0.32)  | 0.85      |      |
| 11-02 | Gp4 Focus 2 | g.chr3:86023459G>A   | Intron            | CADM2    |          | cell adhesion molecule 2114 (0.00)             | 37 (0.54)  | 1.44      |      |
| 11-02 | Gp4 Focus 2 | g.chr3:86071047G>A   | Intron            | CADM2    |          | cell adhesion molecule 256 (0.00)              | 41 (0.22)  | 0.59      |      |
| 11-02 | Gp4 Focus 2 | g.chr3:86075386G>A   | Intron            | CADM2    |          | cell adhesion molecule 245 (0.00)              | 29 (0.28)  | 0.74      |      |
| 11-02 | Gp4 Focus 2 | g.chr3:62751612G>A   | Silent            | CADPS    | p.F163F  | Ca <sup>++</sup> -dependent secretin 39 (0.00) | 31 (0.19)  | 0.52      |      |
| 11-02 | Gp4 Focus 2 | g.chr17:46928453G>A  | Silent            | CALCOCO2 | p.E206E  | calcium binding and coi 72 (0.00)              | 18 (0.33)  | 0.89      |      |
| 11-02 | Gp4 Focus 2 | g.chr10:105209545G>A | Missense Mutation | CALHM2   | p.R52W   | calcium homeostasis mc 19 (0.00)               | 35 (0.23)  | 0.61      |      |
| 11-02 | Gp4 Focus 2 | g.chr10:12802986G>A  | Silent            | CAMK1D   | p.K113K  | calcium/calmodulin-dep 23 (0.00)               | 22 (0.41)  | 1.37      |      |
| 11-02 | Gp4 Focus 2 | g.chr4:114436259G>A  | Missense Mutation | CAMK2D   | p.T262I  | calcium/calmodulin-dep 47 (0.00)               | 43 (0.23)  | 0.62      |      |
| 11-02 | Gp4 Focus 2 | g.chr3:48266134C>A   | Silent            | CAMP     | p.A120A  | cathelicidin antimicrobi: 15 (0.00)            | 47 (0.15)  | 0.40      |      |
| 11-02 | Gp4 Focus 2 | g.chr9:138715028G>A  | Silent            | CAMSAP1  | p.I493I  | calmodulin regulated sp 39 (0.00)              | 55 (0.25)  | 0.68      |      |
| 11-02 | Gp4 Focus 2 | g.chr1:200825218C>G  | Missense Mutation | CAMSAP2  | p.T1326R | calmodulin regulated sp 38 (0.00)              | 52 (0.19)  | 0.51      |      |
| 11-02 | Gp4 Focus 2 | g.chrX:110494194C>A  | Missense Mutation | CAPN6    | p.R370L  | calpain 6                                      | 37 (0.00)  | 33 (0.21) | 0.47 |
| 11-02 | Gp4 Focus 2 | g.chr16:55600747G>T  | Missense Mutation | CAPNS2   | p.G27C   | calpain, small subunit 2 35 (0.00)             | 46 (0.33)  | 0.87      |      |
| 11-02 | Gp4 Focus 2 | g.chr16:55601307G>A  | Silent            | CAPNS2   | p.L213L  | calpain, small subunit 2 119 (0.00)            | 72 (0.19)  | 0.52      |      |
| 11-02 | Gp4 Focus 2 | g.chr11:34097943C>T  | Missense Mutation | CAPRIN1  | p.P176L  | cell cycle associated pro 71 (0.00)            | 55 (0.15)  | 0.39      |      |
| 11-02 | Gp4 Focus 2 | g.chr11:34098185C>A  | Silent            | CAPRIN1  | p.T228T  | cell cycle associated pro 54 (0.00)            | 35 (0.17)  | 0.46      |      |
| 11-02 | Gp4 Focus 2 | g.chr7:116544351G>A  | Missense Mutation | CAPZA2   | p.E114K  | capping protein (actin fi 69 (0.00)            | 10 (0.70)  | 1.87      |      |
| 11-02 | Gp4 Focus 2 | g.chr1:19683233C>A   | Missense Mutation | CAPZB    | p.G188C  | capping protein (actin fi 81 (0.00)            | 36 (0.17)  | 0.44      |      |
| 11-02 | Gp4 Focus 2 | g.chr19:48715074G>A  | Silent            | CARD8    | p.L503L  | caspase recruitment don 39 (0.00)              | 39 (0.26)  | 0.68      |      |
| 11-02 | Gp4 Focus 2 | g.chr11:67191016C>T  | Silent            | CARNS1   | p.D476D  | carnosine synthase 1 30 (0.00)                 | 27 (0.56)  | 1.48      |      |
| 11-02 | Gp4 Focus 2 | g.chr13:111298411T>A | Missense Mutation | CARS2    | p.K407M  | cysteinyl-tRNA synthet: 19 (0.00)              | 35 (0.14)  | 0.38      |      |
| 11-02 | Gp4 Focus 2 | g.chr13:111335444C>T | Silent            | CARS2    | p.K203K  | cysteinyl-tRNA synthet: 22 (0.00)              | 18 (0.39)  | 1.04      |      |
| 11-02 | Gp4 Focus 2 | g.chr15:40914194C>T  | Missense Mutation | CASC5    | p.H604Y  | cancer susceptibility car 63 (0.00)            | 25 (0.24)  | 0.64      |      |
| 11-02 | Gp4 Focus 2 | g.chr15:40943712C>A  | Missense Mutation | CASC5    | p.Q2112K | cancer susceptibility car 15 (0.00)            | 21 (0.33)  | 0.89      |      |
| 11-02 | Gp4 Focus 2 | g.chr20:32217675G>A  | Missense Mutation | CBFA2T2  | p.V395I  | core-binding factor, runt 15 (0.00)            | 32 (0.44)  | 1.17      |      |
| 11-02 | Gp4 Focus 2 | g.chr10:70506960G>A  | Silent            | CCAR1    | p.L187L  | cell division cycle and a 31 (0.00)            | 38 (0.37)  | 0.98      |      |
| 11-02 | Gp4 Focus 2 | g.chr8:22475225G>A   | Silent            | CCAR2    | p.E669E  | cell cycle and apoptosis 38 (0.00)             | 81 (0.20)  | 0.53      |      |
| 11-02 | Gp4 Focus 2 | g.chr18:66564492G>A  | Missense Mutation | CCDC102B | p.D364N  | coiled-coil domain cont: 102 (0.00)            | 57 (0.12)  | 0.39      |      |
| 11-02 | Gp4 Focus 2 | g.chr2:55764661G>A   | Missense Mutation | CCDC104  | p.E194K  |                                                | 47 (0.00)  | 35 (0.49) | 1.30 |
| 11-02 | Gp4 Focus 2 | g.chr7:31682549T>C   | Missense Mutation | CCDC129  | p.M430T  | coiled-coil domain cont: 69 (0.00)             | 101 (0.19) | 0.50      |      |
| 11-02 | Gp4 Focus 2 | g.chr3:42754685G>A   | Silent            | CCDC13   | p.A614A  | coiled-coil domain cont: 17 (0.00)             | 14 (0.64)  | 1.71      |      |

|       |             |                      |                   |         |          |                          |            |           |      |
|-------|-------------|----------------------|-------------------|---------|----------|--------------------------|------------|-----------|------|
| 11-02 | Gp4 Focus 2 | g.chr16:57764854G>A  | Silent            | CCDC135 | p.E801E  |                          | 22 (0.00)  | 34 (0.18) | 0.47 |
| 11-02 | Gp4 Focus 2 | g.chr3:123667787G>A  | Missense Mutation | CCDC14  | p.P189L  | coiled-coil domain cont: | 35 (0.00)  | 41 (0.27) | 0.72 |
| 11-02 | Gp4 Focus 2 | g.chr2:179718186G>A  | Missense Mutation | CCDC141 | p.L1076F | coiled-coil domain cont: | 37 (0.00)  | 23 (0.22) | 0.58 |
| 11-02 | Gp4 Focus 2 | g.chr2:179718201G>A  | Nonsense Mutation | CCDC141 | p.Q1071* | coiled-coil domain cont: | 36 (0.00)  | 18 (0.28) | 0.74 |
| 11-02 | Gp4 Focus 2 | g.chr11:124829840G>A | Missense Mutation | CCDC15  | p.G153R  | coiled-coil domain cont: | 62 (0.00)  | 36 (0.50) | 1.33 |
| 11-02 | Gp4 Focus 2 | g.chr2:197521538C>T  | Missense Mutation | CCDC150 | p.R120W  | coiled-coil domain cont: | 64 (0.00)  | 45 (0.51) | 1.36 |
| 11-02 | Gp4 Focus 2 | g.chr6:151894582G>A  | Missense Mutation | CCDC170 | p.E350K  | coiled-coil domain cont: | 22 (0.00)  | 25 (0.24) | 0.64 |
| 11-02 | Gp4 Focus 2 | g.chr9:15724949C>A   | Missense Mutation | CCDC171 | p.S556Y  | coiled-coil domain cont: | 28 (0.00)  | 71 (0.79) | 2.57 |
| 11-02 | Gp4 Focus 2 | g.chr1:3669145C>T    | Nonsense Mutation | CCDC27  | p.Q34*   | coiled-coil domain cont: | 28 (0.00)  | 23 (0.26) | 0.70 |
| 11-02 | Gp4 Focus 2 | g.chr15:74536359T>A  | Missense Mutation | CCDC33  | p.S19T   | coiled-coil domain cont: | 30 (0.00)  | 56 (0.29) | 0.76 |
| 11-02 | Gp4 Focus 2 | g.chr17:78032777G>A  | Missense Mutation | CCDC40  | p.E480K  | coiled-coil domain cont: | 18 (0.00)  | 29 (0.28) | 0.74 |
| 11-02 | Gp4 Focus 2 | g.chr10:61552866G>A  | Missense Mutation | CCDC6   | p.P412S  | coiled-coil domain cont: | 28 (0.00)  | 16 (0.44) | 1.39 |
| 11-02 | Gp4 Focus 2 | g.chr12:119926600G>A | Nonsense Mutation | CCDC60  | p.W162*  | coiled-coil domain cont: | 32 (0.00)  | 17 (0.35) | 0.94 |
| 11-02 | Gp4 Focus 2 | g.chr12:119937952G>A | Silent            | CCDC60  | p.E209E  | coiled-coil domain cont: | 27 (0.00)  | 24 (0.21) | 0.56 |
| 11-02 | Gp4 Focus 2 | g.chr12:111317878G>A | Missense Mutation | CCDC63  | p.A180T  | coiled-coil domain cont: | 56 (0.00)  | 39 (0.21) | 0.55 |
| 11-02 | Gp4 Focus 2 | g.chr12:120436381G>A | Silent            | CCDC64  | p.E162E  | coiled-coil domain cont: | 33 (0.00)  | 31 (0.19) | 0.52 |
| 11-02 | Gp4 Focus 2 | g.chr3:56647749G>A   | Missense Mutation | CCDC66  | p.E513K  | coiled-coil domain cont: | 76 (0.00)  | 80 (0.34) | 0.90 |
| 11-02 | Gp4 Focus 2 | g.chr11:93088691G>A  | Missense Mutation | CCDC67  | p.D62N   | coiled-coil domain cont: | 143 (0.00) | 43 (0.28) | 0.74 |
| 11-02 | Gp4 Focus 2 | g.chr2:56570027C>T   | Silent            | CCDC85A | p.S418S  | coiled-coil domain cont: | 51 (0.00)  | 18 (0.39) | 1.04 |
| 11-02 | Gp4 Focus 2 | g.chr14:91745601G>A  | Silent            | CCDC88C | p.S1583S | coiled-coil domain cont: | 33 (0.00)  | 42 (0.14) | 0.38 |
| 11-02 | Gp4 Focus 2 | g.chr14:91810002C>A  | Splice Site       | CCDC88C |          | coiled-coil domain cont: | 33 (0.00)  | 29 (0.34) | 0.92 |
| 11-02 | Gp4 Focus 2 | g.chr4:7043691C>T    | Silent            | CCDC96  | p.K325K  | coiled-coil domain cont: | 36 (0.00)  | 49 (0.18) | 0.49 |
| 11-02 | Gp4 Focus 2 | g.chr5:68467123G>A   | Missense Mutation | CCNB1   | p.M130I  | cyclin B1                | 39 (0.00)  | 15 (0.53) | 1.77 |
| 11-02 | Gp4 Focus 2 | g.chr4:77969397G>C   | Missense Mutation | CCNI    | p.P370R  | cyclin I                 | 28 (0.00)  | 20 (0.50) | 1.33 |
| 11-02 | Gp4 Focus 2 | g.chr3:39373957G>A   | Silent            | CCR8    | p.L45L   | chemokine (C-C motif)    | 22 (0.00)  | 15 (0.60) | 1.60 |
| 11-02 | Gp4 Focus 2 | g.chr12:69987312G>A  | Missense Mutation | CCT2    | p.E301K  | chaperonin containing T  | 25 (0.00)  | 11 (0.45) | 1.21 |
| 11-02 | Gp4 Focus 2 | g.chr1:156287267C>A  | Missense Mutation | CCT3    | p.Q277H  | chaperonin containing T  | 85 (0.00)  | 28 (0.29) | 0.76 |
| 11-02 | Gp4 Focus 2 | g.chr17:33288405G>A  | Missense Mutation | CCT6B   | p.A3V    | chaperonin containing T  | 22 (0.00)  | 18 (0.33) | 0.89 |
| 11-02 | Gp4 Focus 2 | g.chr22:17072550C>T  | Silent            | CCT8L2  | p.G297G  | chaperonin containing T  | 87 (0.00)  | 42 (0.29) | 0.76 |
| 11-02 | Gp4 Focus 2 | g.chr1:117568381C>T  | Silent            | CD101   | p.V893V  | CD101 molecule           | 40 (0.00)  | 76 (0.20) | 0.41 |
| 11-02 | Gp4 Focus 2 | g.chr12:7559290G>C   | Missense Mutation | CD163L1 | p.L319V  | CD163 molecule-like 1    | 23 (0.00)  | 20 (0.25) | 0.67 |
| 11-02 | Gp4 Focus 2 | g.chr1:158226046C>T  | Missense Mutation | CD1A    | p.A193V  | CD1a molecule            | 27 (0.00)  | 51 (0.65) | 1.73 |
| 11-02 | Gp4 Focus 2 | g.chr1:158299350C>A  | Missense Mutation | CD1B    | p.K232N  | CD1b molecule            | 24 (0.00)  | 22 (0.50) | 1.33 |
| 11-02 | Gp4 Focus 2 | g.chr3:112063843G>A  | Silent            | CD200   | p.L43L   | CD200 molecule           | 25 (0.00)  | 46 (0.33) | 0.87 |
| 11-02 | Gp4 Focus 2 | g.chr3:112068664G>A  | Missense Mutation | CD200   | p.R267Q  | CD200 molecule           | 33 (0.00)  | 23 (0.74) | 1.97 |

|       |             |                      |                   |          |          |                           |            |           |      |
|-------|-------------|----------------------|-------------------|----------|----------|---------------------------|------------|-----------|------|
| 11-02 | Gp4 Focus 2 | g.chr19:7808041C>T   | Missense Mutation | CD209    | p.D367N  | CD209 molecule            | 36 (0.00)  | 24 (0.25) | 0.67 |
| 11-02 | Gp4 Focus 2 | g.chr1:160811415G>A  | Missense Mutation | CD244    | p.S113F  | CD244 molecule, natura    | 23 (0.00)  | 20 (0.30) | 0.80 |
| 11-02 | Gp4 Focus 2 | g.chr11:66082812C>T  | Missense Mutation | CD248    | p.A563T  | CD248 molecule, endos     | 21 (0.00)  | 29 (0.59) | 1.56 |
| 11-02 | Gp4 Focus 2 | g.chr1:208062037C>A  | Missense Mutation | CD34     | p.G321V  | CD34 molecule             | 107 (0.00) | 23 (0.26) | 0.70 |
| 11-02 | Gp4 Focus 2 | g.chr11:35201954G>A  | Splice Site       | CD44     | p.A123T  | CD44 molecule (Indian     | 37 (0.00)  | 30 (0.30) | 0.80 |
| 11-02 | Gp4 Focus 2 | g.chr1:207966907T>G  | Missense Mutation | CD46     | p.S391A  | CD46 molecule, comple     | 29 (0.00)  | 23 (0.39) | 1.04 |
| 11-02 | Gp4 Focus 2 | g.chr1:157805895G>A  | Missense Mutation | CD5L     | p.R36W   | CD5 molecule-like         | 25 (0.00)  | 27 (0.19) | 0.49 |
| 11-02 | Gp4 Focus 2 | g.chr11:44626618C>A  | Silent            | CD82     | p.S49S   | CD82 molecule             | 15 (0.00)  | 20 (0.35) | 0.93 |
| 11-02 | Gp4 Focus 2 | g.chr2:87013056G>A   | Missense Mutation | CD8A     | p.A232V  | CD8a molecule             | 27 (0.00)  | 24 (0.46) | 1.22 |
| 11-02 | Gp4 Focus 2 | g.chr2:87085534G>A   | Missense Mutation | CD8B     | p.H17Y   | CD8b molecule             | 26 (0.00)  | 39 (0.21) | 0.55 |
| 11-02 | Gp4 Focus 2 | g.chr19:14507156G>A  | Missense Mutation | CD97     | p.V117M  | CD97 molecule             | 31 (0.00)  | 36 (0.31) | 0.81 |
| 11-02 | Gp4 Focus 2 | g.chr9:4685039G>A    | Missense Mutation | CDC37L1  | p.A99T   | cell division cycle 37-li | 44 (0.00)  | 35 (0.23) | 0.61 |
| 11-02 | Gp4 Focus 2 | g.chr6:110532007G>A  | Splice Site       | CDC40    |          | cell division cycle 40    | 17 (0.00)  | 31 (0.16) | 0.43 |
| 11-02 | Gp4 Focus 2 | g.chr1:227235682G>A  | Silent            | CDC42BPA | p.H978H  | CDC42 binding protein     | 21 (0.00)  | 18 (0.33) | 0.89 |
| 11-02 | Gp4 Focus 2 | g.chr14:103438377C>T | Missense Mutation | CDC42BPB | p.R588H  | CDC42 binding protein     | 27 (0.00)  | 30 (0.20) | 0.53 |
| 11-02 | Gp4 Focus 2 | g.chr6:44390476G>A   | Missense Mutation | CDC5L    | p.R445Q  | cell division cycle 5-lik | 59 (0.00)  | 62 (0.15) | 0.39 |
| 11-02 | Gp4 Focus 2 | g.chr8:25364867G>A   | Silent            | CDCA2    | p.R895R  | cell division cycle assoc | 82 (0.00)  | 31 (0.35) | 0.95 |
| 11-02 | Gp4 Focus 2 | g.chr2:174229693G>A  | Silent            | CDCA7    | p.R211R  | cell division cycle assoc | 33 (0.00)  | 10 (0.70) | 1.87 |
| 11-02 | Gp4 Focus 2 | g.chr16:68857342G>A  | Silent            | CDH1     | p.E659E  | cadherin 1, type 1, E-ca  | 47 (0.00)  | 20 (0.25) | 0.67 |
| 11-02 | Gp4 Focus 2 | g.chr16:68857394C>A  | Missense Mutation | CDH1     | p.Q677K  | cadherin 1, type 1, E-ca  | 27 (0.00)  | 60 (0.22) | 0.58 |
| 11-02 | Gp4 Focus 2 | g.chr16:68857463C>T  | Missense Mutation | CDH1     | p.P700S  | cadherin 1, type 1, E-ca  | 35 (0.00)  | 52 (0.27) | 0.72 |
| 11-02 | Gp4 Focus 2 | g.chr10:73406351G>A  | Missense Mutation | CDH23    | p.G481R  | cadherin-related 23       | 29 (0.00)  | 60 (0.37) | 0.98 |
| 11-02 | Gp4 Focus 2 | g.chr10:73472452G>A  | Missense Mutation | CDH23    | p.G1089D | cadherin-related 23       | 19 (0.00)  | 36 (0.25) | 0.67 |
| 11-02 | Gp4 Focus 2 | g.chr1:1636391C>T    | Silent            | CDK11A   | p.E460E  | cyclin-dependent kinase   | 29 (0.00)  | 26 (0.50) | 1.33 |
| 11-02 | Gp4 Focus 2 | g.chr7:90613515G>A   | Missense Mutation | CDK14    | p.G334R  | cyclin-dependent kinase   | 20 (0.00)  | 17 (0.29) | 0.78 |
| 11-02 | Gp4 Focus 2 | g.chr20:31984582C>T  | Missense Mutation | CDK5RAP1 | p.G97R   | CDK5 regulatory subun     | 74 (0.01)  | 41 (0.54) | 1.43 |
| 11-02 | Gp4 Focus 2 | g.chr9:123210402C>T  | Silent            | CDK5RAP2 | p.E932E  | CDK5 regulatory subun     | 49 (0.00)  | 70 (0.56) | 1.16 |
| 11-02 | Gp4 Focus 2 | g.chr9:123298750C>T  | Missense Mutation | CDK5RAP2 | p.E188K  | CDK5 regulatory subun     | 18 (0.00)  | 13 (0.46) | 0.96 |
| 11-02 | Gp4 Focus 2 | g.chr9:123301319C>T  | Splice Site       | CDK5RAP2 | p.K169K  | CDK5 regulatory subun     | 89 (0.00)  | 14 (0.64) | 1.34 |
| 11-02 | Gp4 Focus 2 | g.chr9:21970358G>A   | Intron            | CDKN2A   |          | cyclin-dependent kinase   | 23 (0.00)  | 29 (0.17) | 0.46 |
| 11-02 | Gp4 Focus 2 | g.chr5:115151983C>T  | Missense Mutation | CDO1     | p.E38K   | cysteine dioxygenase tyj  | 49 (0.00)  | 31 (0.16) | 0.43 |
| 11-02 | Gp4 Focus 2 | g.chr11:125880400G>A | Missense Mutation | CDON     | p.S463L  | cell adhesion associated  | 50 (0.00)  | 42 (0.36) | 0.95 |
| 11-02 | Gp4 Focus 2 | g.chr19:45182170G>A  | Silent            | CEACAM19 | p.S207S  | carcinoembryonic antig    | 37 (0.00)  | 19 (0.47) | 1.26 |
| 11-02 | Gp4 Focus 2 | g.chr19:42213813C>T  | Silent            | CEACAM5  | p.P93P   | carcinoembryonic antig    | 47 (0.00)  | 22 (0.27) | 0.73 |
| 11-02 | Gp4 Focus 2 | g.chr19:42223994G>A  | Silent            | CEACAM5  | p.R545R  | carcinoembryonic antig    | 17 (0.00)  | 22 (0.64) | 1.70 |

|       |             |                      |                   |         |          |                                       |           |      |
|-------|-------------|----------------------|-------------------|---------|----------|---------------------------------------|-----------|------|
| 11-02 | Gp4 Focus 2 | g.chr19:42190909T>G  | Missense Mutation | CEACAM7 | p.Y103S  | carcinoembryonic antigen 18 (0.00)    | 49 (0.18) | 0.49 |
| 11-02 | Gp4 Focus 2 | g.chr22:17983882C>G  | Missense Mutation | CECR2   | p.S72C   | cat eye syndrome chromosome 29 (0.00) | 42 (0.19) | 0.51 |
| 11-02 | Gp4 Focus 2 | g.chr1:214818935G>A  | Missense Mutation | CENPF   | p.E2008K | centromere protein F, 35k22 (0.00)    | 33 (0.21) | 0.57 |
| 11-02 | Gp4 Focus 2 | g.chrX:100364530G>A  | Missense Mutation | CENPI   | p.V145I  | centromere protein I 68 (0.01)        | 18 (0.50) | 1.11 |
| 11-02 | Gp4 Focus 2 | g.chr11:117258040G>C | Missense Mutation | CEP164  | p.E616Q  | centrosomal protein 16445 (0.00)      | 11 (0.45) | 1.21 |
| 11-02 | Gp4 Focus 2 | g.chr18:13056610C>G  | Missense Mutation | CEP192  | p.L1341V | centrosomal protein 19273 (0.00)      | 19 (0.68) | 1.82 |
| 11-02 | Gp4 Focus 2 | g.chr1:180031471G>A  | Silent            | CEP350  | p.E1793E | centrosomal protein 35067 (0.01)      | 53 (0.21) | 0.55 |
| 11-02 | Gp4 Focus 2 | g.chr7:130042634G>A  | Silent            | CEP41   | p.I143I  | centrosomal protein 41k17 (0.00)      | 20 (0.45) | 1.20 |
| 11-02 | Gp4 Focus 2 | g.chr10:95278693G>A  | Silent            | CEP55   | p.L351L  | centrosomal protein 55k57 (0.00)      | 10 (0.70) | 1.87 |
| 11-02 | Gp4 Focus 2 | g.chr6:109480498C>T  | Silent            | CEP57L1 | p.I283I  | centrosomal protein 57k44 (0.00)      | 40 (0.17) | 0.47 |
| 11-02 | Gp4 Focus 2 | g.chr1:26581722C>T   | Missense Mutation | CEP85   | p.P90L   | centrosomal protein 85k71 (0.00)      | 60 (0.35) | 0.93 |
| 11-02 | Gp4 Focus 2 | g.chr6:118786620G>A  | Missense Mutation | CEP85L  | p.T789I  | centrosomal protein 85k42 (0.00)      | 30 (0.23) | 0.62 |
| 11-02 | Gp4 Focus 2 | g.chr3:101476748A>T  | Missense Mutation | CEP97   | p.D374V  | centrosomal protein 97k23 (0.00)      | 41 (0.15) | 0.39 |
| 11-02 | Gp4 Focus 2 | g.chr2:202025265C>T  | Missense Mutation | CFLAR   | p.H302Y  | CASP8 and FADD-like 58 (0.00)         | 34 (0.15) | 0.39 |
| 11-02 | Gp4 Focus 2 | g.chr17:48543071C>T  | Missense Mutation | CHAD    | p.R312Q  | chondroadherin 19 (0.00)              | 63 (0.21) | 0.55 |
| 11-02 | Gp4 Focus 2 | g.chr17:48543180C>T  | Missense Mutation | CHAD    | p.E276K  | chondroadherin 47 (0.00)              | 36 (0.19) | 0.52 |
| 11-02 | Gp4 Focus 2 | g.chr19:4409022G>A   | Missense Mutation | CHAF1A  | p.E76K   | chromatin assembly factor 55 (0.00)   | 25 (0.40) | 1.07 |
| 11-02 | Gp4 Focus 2 | g.chr13:115089763C>T | Missense Mutation | CHAMP1  | p.T149I  | chromosome alignment 50 (0.00)        | 25 (0.20) | 0.53 |
| 11-02 | Gp4 Focus 2 | g.chr5:98215964G>A   | Intron            | CHD1    |          | chromodomain helicase 216 (0.00)      | 45 (0.38) | 1.01 |
| 11-02 | Gp4 Focus 2 | g.chr5:98259868G>A   | Intron            | CHD1    |          | chromodomain helicase 24 (0.00)       | 54 (0.28) | 0.74 |
| 11-02 | Gp4 Focus 2 | g.chr1:146724340C>G  | Missense Mutation | CHD1L   | p.Q64E   | chromodomain helicase 104 (0.00)      | 44 (0.27) | 0.73 |
| 11-02 | Gp4 Focus 2 | g.chr15:93518140G>A  | Missense Mutation | CHD2    | p.R846Q  | chromodomain helicase 47 (0.00)       | 15 (0.40) | 1.32 |
| 11-02 | Gp4 Focus 2 | g.chr12:6701112G>A   | Silent            | CHD4    | p.N1017N | chromodomain helicase 25 (0.00)       | 22 (0.41) | 1.09 |
| 11-02 | Gp4 Focus 2 | g.chr12:6709443C>G   | Missense Mutation | CHD4    | p.M391I  | chromodomain helicase 21 (0.00)       | 17 (0.76) | 2.04 |
| 11-02 | Gp4 Focus 2 | g.chr1:6167543G>A    | Intron            | CHD5    |          | chromodomain helicase 24 (0.00)       | 41 (0.20) | 0.52 |
| 11-02 | Gp4 Focus 2 | g.chr1:6168283G>A    | Intron            | CHD5    |          | chromodomain helicase 21 (0.00)       | 47 (0.34) | 0.91 |
| 11-02 | Gp4 Focus 2 | g.chr1:6168331G>A    | Intron            | CHD5    |          | chromodomain helicase 18 (0.00)       | 31 (0.52) | 1.38 |
| 11-02 | Gp4 Focus 2 | g.chr1:6168408G>A    | Intron            | CHD5    |          | chromodomain helicase 24 (0.00)       | 51 (0.22) | 0.58 |
| 11-02 | Gp4 Focus 2 | g.chr1:6168921G>A    | Intron            | CHD5    |          | chromodomain helicase 16 (0.00)       | 47 (0.28) | 0.74 |
| 11-02 | Gp4 Focus 2 | g.chr1:6210692G>A    | Intron            | CHD5    |          | chromodomain helicase 31 (0.00)       | 51 (0.39) | 1.05 |
| 11-02 | Gp4 Focus 2 | g.chr1:6210764G>A    | Intron            | CHD5    |          | chromodomain helicase 29 (0.00)       | 41 (0.15) | 0.39 |
| 11-02 | Gp4 Focus 2 | g.chr1:6235968G>A    | Intron            | CHD5    |          | chromodomain helicase 79 (0.00)       | 97 (0.25) | 0.66 |
| 11-02 | Gp4 Focus 2 | g.chr1:6235969G>A    | Intron            | CHD5    |          | chromodomain helicase 79 (0.00)       | 98 (0.24) | 0.65 |
| 11-02 | Gp4 Focus 2 | g.chr8:61736563G>A   | Silent            | CHD7    | p.K1122K | chromodomain helicase 30 (0.00)       | 15 (0.40) | 1.35 |
| 11-02 | Gp4 Focus 2 | g.chr8:61766011G>A   | Missense Mutation | CHD7    | p.E2243K | chromodomain helicase 44 (0.00)       | 38 (0.24) | 0.80 |

|       |             |                      |                   |         |          |                                  |           |           |      |
|-------|-------------|----------------------|-------------------|---------|----------|----------------------------------|-----------|-----------|------|
| 11-02 | Gp4 Focus 2 | g.chr8:61766043G>A   | Silent            | CHD7    | p.E2253E | chromodomain helicase 33 (0.00)  | 39 (0.18) | 0.61      |      |
| 11-02 | Gp4 Focus 2 | g.chr8:61773585G>A   | Silent            | CHD7    | p.G2577G | chromodomain helicase 145 (0.00) | 25 (0.20) | 0.68      |      |
| 11-02 | Gp4 Focus 2 | g.chr14:21873383G>A  | Missense Mutation | CHD8    | p.P1098S | chromodomain helicase 85 (0.00)  | 24 (0.33) | 0.49      |      |
| 11-02 | Gp4 Focus 2 | g.chr16:53358056C>A  | Missense Mutation | CHD9    | p.A2632E | chromodomain helicase 78 (0.00)  | 32 (0.41) | 1.08      |      |
| 11-02 | Gp4 Focus 2 | g.chr20:5904588C>T   | Nonsense Mutation | CHGB    | p.Q600*  | chromogranin B (secret           | 40 (0.00) | 12 (0.58) | 1.56 |
| 11-02 | Gp4 Focus 2 | g.chr1:111826761C>A  | RNA               | CHIAP2  |          | chitinase, acidic pseudo         | 69 (0.00) | 19 (0.26) | 0.55 |
| 11-02 | Gp4 Focus 2 | g.chr19:59063026C>A  | Missense Mutation | CHMP2A  | p.R220L  | charged multivesicular t         | 56 (0.00) | 33 (0.21) | 0.57 |
| 11-02 | Gp4 Focus 2 | g.chr19:59065532C>T  | Silent            | CHMP2A  | p.R16R   | charged multivesicular t         | 32 (0.00) | 33 (0.27) | 0.73 |
| 11-02 | Gp4 Focus 2 | g.chr8:23114001C>T   | Missense Mutation | CHMP7   | p.A229V  | charged multivesicular t         | 35 (0.00) | 26 (0.50) | 1.33 |
| 11-02 | Gp4 Focus 2 | g.chr3:184102345G>A  | Silent            | CHRD    | p.G487G  | chordin                          | 15 (0.00) | 39 (0.15) | 0.41 |
| 11-02 | Gp4 Focus 2 | g.chr17:4805349G>A   | Silent            | CHRNE   | p.A126A  | cholinergic receptor, nic        | 17 (0.00) | 21 (0.29) | 0.76 |
| 11-02 | Gp4 Focus 2 | g.chr2:101010137C>G  | Missense Mutation | CHST10  | p.R214T  | carbohydrate sulfotransf         | 52 (0.00) | 13 (0.38) | 1.03 |
| 11-02 | Gp4 Focus 2 | g.chr1:153610832C>G  | Missense Mutation | CHTOP   | p.Q43E   | chromatin target of PRM          | 80 (0.00) | 45 (0.16) | 0.41 |
| 11-02 | Gp4 Focus 2 | g.chr16:57466433G>A  | Missense Mutation | CIAPIN1 | p.T199I  | cytokine induced apoptc          | 31 (0.00) | 36 (0.17) | 0.44 |
| 11-02 | Gp4 Focus 2 | g.chr19:42799035C>T  | Silent            | CIC     | p.L2413L | capicua transcriptional r        | 33 (0.00) | 26 (0.50) | 1.33 |
| 11-02 | Gp4 Focus 2 | g.chr16:11000748G>A  | Missense Mutation | CIITA   | p.D467N  | class II, major histocom         | 17 (0.00) | 17 (0.29) | 0.94 |
| 11-02 | Gp4 Focus 2 | g.chr12:120135825G>A | Silent            | CIT     | p.F1886F | citron rho-interacting se        | 36 (0.00) | 14 (0.43) | 1.14 |
| 11-02 | Gp4 Focus 2 | g.chr12:120139702C>T | Missense Mutation | CIT     | p.G1789E | citron rho-interacting se        | 32 (0.00) | 21 (0.52) | 1.40 |
| 11-02 | Gp4 Focus 2 | g.chr11:46776507C>T  | Missense Mutation | CKAP5   | p.M1600I | cytoskeleton associated          | 33 (0.00) | 22 (0.23) | 0.61 |
| 11-02 | Gp4 Focus 2 | g.chr1:86904659G>A   | Missense Mutation | CLCA2   | p.G358E  | chloride channel access          | 37 (0.00) | 15 (0.40) | 1.07 |
| 11-02 | Gp4 Focus 2 | g.chr1:86919226T>A   | Missense Mutation | CLCA2   | p.V777E  | chloride channel access          | 68 (0.00) | 25 (0.20) | 0.53 |
| 11-02 | Gp4 Focus 2 | g.chr7:143018521C>A  | Missense Mutation | CLCN1   | p.T166N  | chloride channel, voltag         | 15 (0.00) | 34 (0.18) | 0.47 |
| 11-02 | Gp4 Focus 2 | g.chr3:184069853C>A  | Missense Mutation | CLCN2   | p.C744F  | chloride channel, voltag         | 22 (0.00) | 44 (0.34) | 0.91 |
| 11-02 | Gp4 Focus 2 | g.chr4:170634366G>A  | Silent            | CLCN3   | p.V762V  | chloride channel, voltag         | 42 (0.00) | 18 (0.39) | 1.33 |
| 11-02 | Gp4 Focus 2 | g.chr1:11883773G>A   | Missense Mutation | CLCN6   | p.A155T  | chloride channel, voltag         | 17 (0.00) | 17 (0.29) | 0.78 |
| 11-02 | Gp4 Focus 2 | g.chr1:16352609G>A   | Missense Mutation | CLCNKA  | p.G122E  | chloride channel, voltag         | 41 (0.00) | 78 (0.37) | 0.99 |
| 11-02 | Gp4 Focus 2 | g.chr3:190026069C>T  | Silent            | CLDN1   | p.V211V  | claudin 1                        | 15 (0.00) | 16 (0.50) | 1.33 |
| 11-02 | Gp4 Focus 2 | g.chr3:137749924G>A  | Missense Mutation | CLDN18  | p.G243R  | claudin 18                       | 93 (0.00) | 40 (0.72) | 1.93 |
| 11-02 | Gp4 Focus 2 | g.chr16:78056549G>A  | Missense Mutation | CLEC3A  | p.C18Y   | C-type lectin domain fa          | 27 (0.00) | 27 (0.33) | 0.89 |
| 11-02 | Gp4 Focus 2 | g.chr12:8289444G>A   | Missense Mutation | CLEC4A  | p.E171K  | C-type lectin domain fa          | 59 (0.00) | 46 (0.28) | 0.75 |
| 11-02 | Gp4 Focus 2 | g.chr12:122839746C>A | Silent            | CLIP1   | p.L373L  | CAP-GLY domain cont              | 36 (0.00) | 40 (0.20) | 0.53 |
| 11-02 | Gp4 Focus 2 | g.chr1:155237827G>A  | Silent            | CLK2    | p.I214I  | CDC-like kinase 2                | 28 (0.00) | 26 (0.19) | 0.51 |
| 11-02 | Gp4 Focus 2 | g.chr13:77569344G>A  | Missense Mutation | CLN5    | p.G156E  | ceroid-lipofuscinosis, ne        | 51 (0.00) | 32 (0.31) | 0.83 |
| 11-02 | Gp4 Focus 2 | g.chr11:72114062G>A  | Missense Mutation | CLPB    | p.H164Y  | ClpB caseinolytic peptic         | 20 (0.00) | 27 (0.52) | 1.38 |
| 11-02 | Gp4 Focus 2 | g.chr3:150690365G>A  | Missense Mutation | CLRN1   | p.A44V   | clarin 1                         | 36 (0.00) | 17 (0.41) | 1.10 |

|       |             |                      |                   |         |          |                           |            |           |      |
|-------|-------------|----------------------|-------------------|---------|----------|---------------------------|------------|-----------|------|
| 11-02 | Gp4 Focus 2 | g.chr1:36202555G>T   | Missense Mutation | CLSPN   | p.P1290H | claspin                   | 50 (0.00)  | 39 (0.15) | 0.41 |
| 11-02 | Gp4 Focus 2 | g.chr1:36212584A>T   | Missense Mutation | CLSPN   | p.N879K  | claspin                   | 39 (0.00)  | 45 (0.16) | 0.41 |
| 11-02 | Gp4 Focus 2 | g.chr8:27462583C>T   | Silent            | CLU     | p.L229L  | clusterin                 | 31 (0.00)  | 47 (0.38) | 1.02 |
| 11-02 | Gp4 Focus 2 | g.chr5:10290704G>A   | Silent            | CMBL    | p.P57P   | carboxymethylenebuten     | 51 (0.00)  | 24 (0.83) | 2.22 |
| 11-02 | Gp4 Focus 2 | g.chr5:79028117G>A   | Missense Mutation | CMYA5   | p.V1177I | cardiomyopathy associa    | 82 (0.00)  | 42 (0.24) | 0.63 |
| 11-02 | Gp4 Focus 2 | g.chr20:34582998C>T  | Silent            | CNBD2   | p.A298A  | cyclic nucleotide bindin  | 44 (0.00)  | 23 (0.22) | 0.58 |
| 11-02 | Gp4 Focus 2 | g.chr18:72185788A>T  | Nonsense Mutation | CNDP2   | p.K375*  | CNDP dipeptidase 2 (m     | 23 (0.00)  | 36 (0.17) | 0.53 |
| 11-02 | Gp4 Focus 2 | g.chr2:99013236G>A   | Missense Mutation | CNGA3   | p.V539I  | cyclic nucleotide gated c | 50 (0.00)  | 21 (0.29) | 0.76 |
| 11-02 | Gp4 Focus 2 | g.chr2:99013271C>A   | Nonsense Mutation | CNGA3   | p.Y550*  | cyclic nucleotide gated c | 64 (0.00)  | 31 (0.39) | 1.03 |
| 11-02 | Gp4 Focus 2 | g.chr8:87591463C>T   | Missense Mutation | CNGB3   | p.G600E  | cyclic nucleotide gated c | 52 (0.00)  | 18 (0.67) | 1.78 |
| 11-02 | Gp4 Focus 2 | g.chr1:95363363G>A   | Missense Mutation | CNN3    | p.H309Y  | calponin 3, acidic        | 129 (0.00) | 17 (0.65) | 1.73 |
| 11-02 | Gp4 Focus 2 | g.chr10:104679760G>A | Missense Mutation | CNNM2   | p.C508Y  | cyclin and CBS domain     | 24 (0.00)  | 24 (0.58) | 1.56 |
| 11-02 | Gp4 Focus 2 | g.chr16:58559176G>A  | Missense Mutation | CNOT1   | p.H2231Y | CCR4-NOT transcriptio     | 27 (0.00)  | 23 (0.35) | 0.93 |
| 11-02 | Gp4 Focus 2 | g.chr3:32815077G>A   | Missense Mutation | CNOT10  | p.A737T  | CCR4-NOT transcriptio     | 39 (0.03)  | 17 (0.29) | 0.78 |
| 11-02 | Gp4 Focus 2 | g.chr2:220039815G>A  | Silent            | CNPPD1  | p.S92S   | cyclin Pas1/PHO80 dor     | 48 (0.00)  | 41 (0.15) | 0.39 |
| 11-02 | Gp4 Focus 2 | g.chr7:99720146G>A   | Silent            | CNPY4   | p.R96R   | canopy FGF signaling r    | 17 (0.00)  | 21 (0.33) | 0.89 |
| 11-02 | Gp4 Focus 2 | g.chr7:99720523G>A   | Silent            | CNPY4   | p.K153K  | canopy FGF signaling r    | 15 (0.00)  | 20 (0.35) | 0.93 |
| 11-02 | Gp4 Focus 2 | g.chr11:58391862G>A  | Nonsense Mutation | CNTF    | p.W157*  | ciliary neurotrophic fact | 28 (0.00)  | 30 (0.17) | 0.44 |
| 11-02 | Gp4 Focus 2 | g.chr12:41419092G>A  | Silent            | CNTN1   | p.G888G  | contactin 1               | 95 (0.00)  | 41 (0.29) | 0.78 |
| 11-02 | Gp4 Focus 2 | g.chr11:100179147C>T | Missense Mutation | CNTN5   | p.L893F  | contactin 5               | 15 (0.00)  | 32 (0.19) | 0.50 |
| 11-02 | Gp4 Focus 2 | g.chr3:1363341C>T    | Missense Mutation | CNTN6   | p.P257S  | contactin 6               | 89 (0.00)  | 24 (0.21) | 0.56 |
| 11-02 | Gp4 Focus 2 | g.chr7:147259253G>A  | Missense Mutation | CNTNAP2 | p.A601T  | contactin associated pro  | 18 (0.00)  | 25 (0.24) | 0.64 |
| 11-02 | Gp4 Focus 2 | g.chr9:123880785C>T  | Silent            | CNTRL   | p.A539A  | centriolin                | 56 (0.00)  | 33 (0.36) | 0.76 |
| 11-02 | Gp4 Focus 2 | g.chr7:51097145C>T   | Missense Mutation | COBL    | p.D550N  | cordon-bleu WH2 repea     | 19 (0.00)  | 16 (0.38) | 1.00 |
| 11-02 | Gp4 Focus 2 | g.chr2:165557110G>A  | Missense Mutation | COBLL1  | p.S500L  | cordon-bleu WH2 repea     | 28 (0.00)  | 11 (0.55) | 1.45 |
| 11-02 | Gp4 Focus 2 | g.chr14:31355260G>C  | Missense Mutation | COCH    | p.A295P  | cochlin                   | 45 (0.00)  | 34 (0.21) | 0.65 |
| 11-02 | Gp4 Focus 2 | g.chr14:31355397C>T  | Silent            | COCH    | p.F340F  | cochlin                   | 56 (0.02)  | 61 (0.36) | 1.15 |
| 11-02 | Gp4 Focus 2 | g.chr6:75861861C>T   | Missense Mutation | COL12A1 | p.G1274D | collagen, type XII, alph  | 72 (0.00)  | 21 (0.24) | 0.63 |
| 11-02 | Gp4 Focus 2 | g.chr10:71700774C>T  | Missense Mutation | COL13A1 | p.P626S  | collagen, type XIII, alph | 24 (0.00)  | 37 (0.32) | 0.86 |
| 11-02 | Gp4 Focus 2 | g.chr9:101810105G>A  | Missense Mutation | COL15A1 | p.G906D  | collagen, type XV, alph   | 29 (0.00)  | 21 (0.57) | 1.52 |
| 11-02 | Gp4 Focus 2 | g.chr10:105813716G>A | Missense Mutation | COL17A1 | p.P599L  | collagen, type XVII, alp  | 21 (0.00)  | 18 (0.28) | 0.74 |
| 11-02 | Gp4 Focus 2 | g.chr6:70850847G>A   | Splice Site       | COL19A1 | p.G483E  | collagen, type XIX, alpt  | 57 (0.00)  | 20 (0.55) | 1.47 |
| 11-02 | Gp4 Focus 2 | g.chr7:94057609C>T   | Silent            | COL1A2  | p.Y1177Y | collagen, type I, alpha 2 | 52 (0.00)  | 28 (0.25) | 0.67 |
| 11-02 | Gp4 Focus 2 | g.chr8:139793206G>A  | Silent            | COL22A1 | p.P538P  | collagen, type XXII, alp  | 22 (0.00)  | 33 (0.18) | 0.48 |
| 11-02 | Gp4 Focus 2 | g.chr8:139793224C>T  | Splice Site       | COL22A1 |          | collagen, type XXII, alp  | 20 (0.00)  | 34 (0.18) | 0.47 |



|       |             |                      |                   |          |          |                                                   |           |      |
|-------|-------------|----------------------|-------------------|----------|----------|---------------------------------------------------|-----------|------|
| 11-02 | Gp4 Focus 2 | g.chr1:86554904G>A   | Nonsense Mutation | COL24A1  | p.Q554*  | collagen, type XXIV, alpha 22 (0.00)              | 34 (0.24) | 0.63 |
| 11-02 | Gp4 Focus 2 | g.chr1:86578258C>T   | Missense Mutation | COL24A1  | p.G531S  | collagen, type XXIV, alpha 64 (0.00)              | 20 (0.35) | 0.93 |
| 11-02 | Gp4 Focus 2 | g.chr12:48369176G>A  | Silent            | COL2A1   | p.R1270R | collagen, type II, alpha 127 (0.00)               | 12 (0.42) | 1.11 |
| 11-02 | Gp4 Focus 2 | g.chr12:48393805G>A  | Silent            | COL2A1   | p.L63L   | collagen, type II, alpha 121 (0.00)               | 18 (0.44) | 1.19 |
| 11-02 | Gp4 Focus 2 | g.chr2:189871107G>A  | Missense Mutation | COL3A1   | p.G1044S | collagen, type III, alpha 28 (0.00)               | 11 (0.64) | 1.70 |
| 11-02 | Gp4 Focus 2 | g.chr13:111082892G>A | Splice Site       | COL4A2   | p.G196R  | collagen, type IV, alpha 80 (0.00)                | 31 (0.19) | 0.52 |
| 11-02 | Gp4 Focus 2 | g.chr2:227945229C>T  | Missense Mutation | COL4A4   | p.G578E  | collagen, type IV, alpha 56 (0.00)                | 15 (0.40) | 1.07 |
| 11-02 | Gp4 Focus 2 | g.chrX:107403817G>A  | Silent            | COL4A6   | p.Y1467Y | collagen, type IV, alpha 41 (0.00)                | 35 (0.20) | 0.45 |
| 11-02 | Gp4 Focus 2 | g.chr2:189927911G>A  | Missense Mutation | COL5A2   | p.P619L  | collagen, type V, alpha 166 (0.00)                | 29 (0.69) | 1.84 |
| 11-02 | Gp4 Focus 2 | g.chr3:130159322C>T  | Missense Mutation | COL6A5   | p.T2047I | collagen, type VI, alpha 85 (0.01)                | 36 (0.19) | 0.52 |
| 11-02 | Gp4 Focus 2 | g.chr3:130293069C>T  | Missense Mutation | COL6A6   | p.L1083F | collagen, type VI, alpha 104 (0.01)               | 28 (0.64) | 1.71 |
| 11-02 | Gp4 Focus 2 | g.chr1:183942750C>T  | Splice Site       | COLGALT2 | p.K209K  | collagen beta(1-O)galactosyl 44 (0.02)            | 13 (0.69) | 1.85 |
| 11-02 | Gp4 Focus 2 | g.chr1:160262276G>A  | Silent            | COPA     | p.N986N  | coatamer protein complex 44 (0.00)                | 54 (0.44) | 1.19 |
| 11-02 | Gp4 Focus 2 | g.chr3:128993779G>A  | Silent            | COPG1    | p.K785K  | coatamer protein complex 40 (0.00)                | 21 (0.38) | 1.02 |
| 11-02 | Gp4 Focus 2 | g.chr2:237998539G>A  | Missense Mutation | COPS8    | p.G78E   | COP9 signalosome subunit 20 (0.00)                | 29 (0.48) | 1.29 |
| 11-02 | Gp4 Focus 2 | g.chr4:47655620C>T   | Missense Mutation | CORIN    | p.R598K  | corin, serine peptidase 90 (0.00)                 | 24 (0.50) | 1.33 |
| 11-02 | Gp4 Focus 2 | g.chr10:101483788G>A | Silent            | COX15    | p.A225A  | cytochrome c oxidase subunit 26 (0.00)            | 25 (0.36) | 0.96 |
| 11-02 | Gp4 Focus 2 | g.chr2:98263847C>T   | Missense Mutation | COX5B    | p.T73I   | cytochrome c oxidase subunit 93 (0.00)            | 60 (0.32) | 0.84 |
| 11-02 | Gp4 Focus 2 | g.chrX:77160720G>A   | Missense Mutation | COX7B    | p.V69I   | cytochrome c oxidase subunit 80 (0.00)            | 19 (0.32) | 0.53 |
| 11-02 | Gp4 Focus 2 | g.chr4:46737152G>A   | Nonsense Mutation | COX7B2   | p.Q20*   | cytochrome c oxidase subunit 25 (0.00)            | 12 (0.42) | 1.11 |
| 11-02 | Gp4 Focus 2 | g.chr7:129950772G>C  | Silent            | CPA4     | p.L313L  | carboxypeptidase A4 29 (0.00)                     | 42 (0.14) | 0.38 |
| 11-02 | Gp4 Focus 2 | g.chr2:207823041G>A  | Missense Mutation | CPO      | p.G95D   | carboxypeptidase O 43 (0.00)                      | 39 (0.26) | 0.68 |
| 11-02 | Gp4 Focus 2 | g.chr2:207823069C>T  | Silent            | CPO      | p.D104D  | carboxypeptidase O 56 (0.00)                      | 38 (0.50) | 1.33 |
| 11-02 | Gp4 Focus 2 | g.chr11:68542790C>A  | Silent            | CPT1A    | p.P523P  | carnitine palmitoyltransferase 59 (0.00)          | 23 (0.22) | 0.58 |
| 11-02 | Gp4 Focus 2 | g.chr7:29135767C>A   | Nonsense Mutation | CPVL     | p.G119*  | carboxypeptidase, vitellin 28 (0.00)              | 27 (0.67) | 1.78 |
| 11-02 | Gp4 Focus 2 | g.chr10:125521632C>A | Silent            | CPXM2    | p.V511V  | carboxypeptidase X (M) 17 (0.00)                  | 26 (0.19) | 0.51 |
| 11-02 | Gp4 Focus 2 | g.chr1:207785077C>T  | Silent            | CR1      | p.D2117D | complement component 92 (0.00)                    | 55 (0.65) | 1.75 |
| 11-02 | Gp4 Focus 2 | g.chr1:207647166C>A  | Missense Mutation | CR2      | p.Q726K  | complement component 17 (0.00)                    | 13 (0.38) | 1.03 |
| 11-02 | Gp4 Focus 2 | g.chr1:207647168G>A  | Silent            | CR2      | p.Q726Q  | complement component 17 (0.00)                    | 13 (0.38) | 1.03 |
| 11-02 | Gp4 Focus 2 | g.chr16:1715107C>T   | Missense Mutation | CRAMP1L  | p.S907F  | Crp, cramped-like (Drosophila) 130 (0.00)         | 23 (0.30) | 0.97 |
| 11-02 | Gp4 Focus 2 | g.chr1:197404142G>A  | Missense Mutation | CRB1     | p.R938K  | crumbs family member 43 (0.00)                    | 17 (0.59) | 1.57 |
| 11-02 | Gp4 Focus 2 | g.chr1:197411375C>A  | Missense Mutation | CRB1     | p.Q1208K | crumbs family member 28 (0.00)                    | 45 (0.16) | 0.41 |
| 11-02 | Gp4 Focus 2 | g.chr7:137590518G>A  | Missense Mutation | CREB3L2  | p.P282L  | cAMP responsive element binding protein 25 (0.00) | 11 (0.82) | 2.18 |
| 11-02 | Gp4 Focus 2 | g.chr19:4164512C>T   | Silent            | CREB3L3  | p.L197L  | cAMP responsive element binding protein 25 (0.00) | 27 (0.22) | 0.59 |
| 11-02 | Gp4 Focus 2 | g.chr19:4164523C>T   | Silent            | CREB3L3  | p.S200S  | cAMP responsive element binding protein 25 (0.00) | 29 (0.17) | 0.46 |

|       |             |                      |                   |              |          |                            |            |            |      |
|-------|-------------|----------------------|-------------------|--------------|----------|----------------------------|------------|------------|------|
| 11-02 | Gp4 Focus 2 | g.chr1:153941524C>T  | Missense Mutation | CREB3L4      | p.P98L   | cAMP responsive eleme      | 58 (0.00)  | 20 (0.25)  | 0.67 |
| 11-02 | Gp4 Focus 2 | g.chr16:3807815G>A   | Missense Mutation | CREBBP       | p.R1202C | CREB binding protein       | 22 (0.00)  | 31 (0.55)  | 1.75 |
| 11-02 | Gp4 Focus 2 | g.chr16:3817760C>G   | Missense Mutation | CREBBP       | p.A1071P | CREB binding protein       | 53 (0.00)  | 21 (0.43)  | 1.37 |
| 11-02 | Gp4 Focus 2 | g.chr2:36706751G>A   | Missense Mutation | CRIM1        | p.G429D  | cysteine rich transmemb    | 16 (0.00)  | 32 (0.19)  | 0.50 |
| 11-02 | Gp4 Focus 2 | g.chr8:75928901G>A   | Missense Mutation | CRISPLD1     | p.D277N  | cysteine-rich secretory p  | 186 (0.00) | 60 (0.32)  | 1.07 |
| 11-02 | Gp4 Focus 2 | g.chr16:84872250C>T  | Missense Mutation | CRISPLD2     | p.A50V   | cysteine-rich secretory p  | 23 (0.00)  | 16 (0.38)  | 1.00 |
| 11-02 | Gp4 Focus 2 | g.chr16:84888369G>A  | Missense Mutation | CRISPLD2     | p.G215S  | cysteine-rich secretory p  | 25 (0.00)  | 16 (0.31)  | 0.83 |
| 11-02 | Gp4 Focus 2 | g.chr20:20028433G>A  | Missense Mutation | CRNKL1       | p.R200W  | crooked neck pre-mRN/45    | (0.00)     | 29 (0.48)  | 1.29 |
| 11-02 | Gp4 Focus 2 | g.chr1:17264146C>T   | Silent            | CROCC        | p.L402L  | ciliary rootlet coiled-coi | 29 (0.00)  | 39 (0.15)  | 0.41 |
| 11-02 | Gp4 Focus 2 | g.chr15:91169162G>A  | Missense Mutation | CRTC3        | p.V302M  | CREB regulated transcri    | 73 (0.00)  | 72 (0.46)  | 1.22 |
| 11-02 | Gp4 Focus 2 | g.chr12:107415900G>A | Missense Mutation | CRY1         | p.R77C   | cryptochrome circadian     | 25 (0.00)  | 46 (0.28)  | 0.75 |
| 11-02 | Gp4 Focus 2 | g.chr1:36933545G>A   | Missense Mutation | CSF3R        | p.S581F  | colony stimulating facto   | 16 (0.00)  | 32 (0.19)  | 0.50 |
| 11-02 | Gp4 Focus 2 | g.chr10:43678942G>A  | Silent            | CSGALNACT    | p.T527T  | chondroitin sulfate N-ac   | 79 (0.01)  | 47 (0.32)  | 0.85 |
| 11-02 | Gp4 Focus 2 | g.chr8:3046426C>T    | Missense Mutation | CSMD1        | p.E1837K | CUB and Sushi multiple     | 15 (0.00)  | 24 (0.25)  | 0.85 |
| 11-02 | Gp4 Focus 2 | g.chr1:34191111G>A   | Missense Mutation | CSMD2        | p.T845I  | CUB and Sushi multiple     | 23 (0.00)  | 15 (0.73)  | 1.96 |
| 11-02 | Gp4 Focus 2 | g.chr8:113812470C>T  | Silent            | CSMD3        | p.V631V  | CUB and Sushi multiple     | 32 (0.00)  | 12 (0.42)  | 1.43 |
| 11-02 | Gp4 Focus 2 | g.chr4:70823502G>A   | Silent            | CSN2         | p.I55I   | casein beta                | 32 (0.00)  | 103 (0.45) | 1.19 |
| 11-02 | Gp4 Focus 2 | g.chr11:11374112G>A  | Silent            | CSNK2A3      | p.G185G  | casein kinase 2, alpha 3   | 45 (0.00)  | 17 (0.35)  | 0.94 |
| 11-02 | Gp4 Focus 2 | g.chr15:75979623C>T  | Silent            | CSPG4        | p.Q1261Q | chondroitin sulfate prote  | 21 (0.00)  | 16 (0.31)  | 0.83 |
| 11-02 | Gp4 Focus 2 | g.chr8:68107638A>G   | Missense Mutation | CSPP1        | p.D1159G | centrosome and spindle     | 42 (0.00)  | 87 (0.25)  | 0.85 |
| 11-02 | Gp4 Focus 2 | g.chr20:23472439G>A  | Silent            | CST8         | p.V45V   | cystatin 8 (cystatin-relat | 32 (0.00)  | 30 (0.37)  | 0.98 |
| 11-02 | Gp4 Focus 2 | g.chr20:23472493G>A  | Silent            | CST8         | p.K63K   | cystatin 8 (cystatin-relat | 27 (0.00)  | 33 (0.36)  | 0.97 |
| 11-02 | Gp4 Focus 2 | g.chr10:53457956C>T  | Missense Mutation | CSTF2T       | p.G452S  | cleavage stimulation fac   | 27 (0.00)  | 44 (0.18)  | 0.62 |
| 11-02 | Gp4 Focus 2 | g.chr10:53457973C>T  | Missense Mutation | CSTF2T       | p.R446K  | cleavage stimulation fac   | 27 (0.00)  | 41 (0.20)  | 0.67 |
| 11-02 | Gp4 Focus 2 | g.chr10:53458477C>T  | Missense Mutation | CSTF2T       | p.G278D  | cleavage stimulation fac   | 25 (0.00)  | 39 (0.18)  | 0.62 |
| 11-02 | Gp4 Focus 2 | g.chr17:34292169G>A  | RNA               | CTB-186H2.2  |          |                            | 32 (0.00)  | 22 (0.36)  | 0.97 |
| 11-02 | Gp4 Focus 2 | g.chr19:18142570G>A  | RNA               | CTB-52I2.4   |          |                            | 37 (0.00)  | 24 (0.46)  | 1.22 |
| 11-02 | Gp4 Focus 2 | g.chr5:134678969G>T  | Missense Mutation | CTC-349C3.1  | p.G84V   |                            | 35 (0.00)  | 33 (0.39)  | 1.05 |
| 11-02 | Gp4 Focus 2 | g.chr17:8132516G>T   | Nonsense Mutation | CTC1         | p.C1055* | CTS telomere maintena      | 195 (0.00) | 14 (0.86)  | 0.64 |
| 11-02 | Gp4 Focus 2 | g.chr11:66281891C>T  | Silent            | CTD-3074O7.1 | p.D95D   |                            | 26 (0.00)  | 17 (0.41)  | 1.10 |
| 11-02 | Gp4 Focus 2 | g.chr11:66281943G>A  | Missense Mutation | CTD-3074O7.1 | p.V113M  |                            | 26 (0.00)  | 18 (0.44)  | 1.19 |
| 11-02 | Gp4 Focus 2 | g.chr11:66291266G>A  | Silent            | CTD-3074O7.1 | p.R378R  |                            | 16 (0.00)  | 23 (0.22)  | 0.58 |
| 11-02 | Gp4 Focus 2 | g.chr18:46287799C>T  | Silent            | CTIF         | p.N370N  | CBP80/20-dependent tra     | 16 (0.00)  | 14 (0.36)  | 0.95 |
| 11-02 | Gp4 Focus 2 | g.chr10:68940116G>A  | Missense Mutation | CTNNA3       | p.R336C  | catenin (cadherin-associ   | 70 (0.00)  | 31 (0.52)  | 1.38 |
| 11-02 | Gp4 Focus 2 | g.chr10:68979422C>T  | Missense Mutation | CTNNA3       | p.M262I  | catenin (cadherin-associ   | 77 (0.01)  | 30 (0.17)  | 0.44 |

|       |             |                      |                   |          |          |                          |            |           |      |
|-------|-------------|----------------------|-------------------|----------|----------|--------------------------|------------|-----------|------|
| 11-02 | Gp4 Focus 2 | g.chr20:36407688G>A  | Missense Mutation | CTNNBL1  | p.E141K  | catenin, beta like 1     | 36 (0.00)  | 19 (0.26) | 0.70 |
| 11-02 | Gp4 Focus 2 | g.chr1:41475217G>A   | Silent            | CTPS1    | p.G549G  | CTP synthase 1           | 30 (0.00)  | 42 (0.67) | 1.78 |
| 11-02 | Gp4 Focus 2 | g.chr11:10796753G>A  | Splice Site       | CTR9     |          | CTR9, Paf1/RNA polyn     | 45 (0.00)  | 18 (0.44) | 1.19 |
| 11-02 | Gp4 Focus 2 | g.chr20:44522703G>A  | Missense Mutation | CTSA     | p.V275M  | cathepsin A              | 43 (0.00)  | 62 (0.26) | 0.69 |
| 11-02 | Gp4 Focus 2 | g.chr1:150724435G>C  | Missense Mutation | CTSS     | p.A150G  | cathepsin S              | 41 (0.00)  | 26 (0.38) | 1.03 |
| 11-02 | Gp4 Focus 2 | g.chr7:117368229G>A  | Silent            | CTTNBP2  | p.A1323A | cortactin binding protei | 43 (0.00)  | 45 (0.20) | 0.53 |
| 11-02 | Gp4 Focus 2 | g.chr6:43152349C>T   | Missense Mutation | CUL9     | p.P101S  | cullin 9                 | 26 (0.00)  | 52 (0.54) | 1.44 |
| 11-02 | Gp4 Focus 2 | g.chr6:43156317G>T   | Missense Mutation | CUL9     | p.A682S  | cullin 9                 | 16 (0.00)  | 32 (0.16) | 0.42 |
| 11-02 | Gp4 Focus 2 | g.chr6:43182841C>T   | Missense Mutation | CUL9     | p.P1877S | cullin 9                 | 43 (0.00)  | 24 (0.42) | 1.11 |
| 11-02 | Gp4 Focus 2 | g.chr12:111729262C>T | Silent            | CUX2     | p.D114D  | cut-like homeobox 2      | 17 (0.00)  | 27 (0.22) | 0.59 |
| 11-02 | Gp4 Focus 2 | g.chr17:36966734G>A  | Missense Mutation | CWC25    | p.H205Y  | CWC25 spliceosome-as     | 39 (0.00)  | 17 (0.41) | 1.10 |
| 11-02 | Gp4 Focus 2 | g.chr5:64079801G>T   | Nonsense Mutation | CWC27    | p.G131*  | CWC27 spliceosome-as     | 35 (0.00)  | 36 (0.17) | 0.55 |
| 11-02 | Gp4 Focus 2 | g.chr11:107224439G>A | Silent            | CWF19L2  | p.D632D  | CWF19-like 2, cell cycl  | 24 (0.00)  | 23 (0.48) | 1.28 |
| 11-02 | Gp4 Focus 2 | g.chrX:149100932C>T  | Missense Mutation | CXorf40B | p.E103K  | chromosome X open rea    | 15 (0.00)  | 12 (0.50) | 0.83 |
| 11-02 | Gp4 Focus 2 | g.chr11:7690878C>T   | Missense Mutation | CYB5R2   | p.G79D   | cytochrome b5 reductas   | 48 (0.00)  | 44 (0.41) | 1.09 |
| 11-02 | Gp4 Focus 2 | g.chr5:156766215C>G  | Missense Mutation | CYFIP2   | p.L820V  | cytoplasmic FMR1 inter   | 63 (0.00)  | 24 (0.21) | 0.56 |
| 11-02 | Gp4 Focus 2 | g.chr5:156788484G>A  | Missense Mutation | CYFIP2   | p.E947K  | cytoplasmic FMR1 inter   | 50 (0.00)  | 25 (0.40) | 1.07 |
| 11-02 | Gp4 Focus 2 | g.chr19:41350556G>A  | Missense Mutation | CYP2A6   | p.A428V  | cytochrome P450, famil   | 68 (0.00)  | 21 (0.38) | 1.02 |
| 11-02 | Gp4 Focus 2 | g.chr19:41626307G>A  | Silent            | CYP2F1   | p.Q130Q  | cytochrome P450, famil   | 40 (0.00)  | 27 (0.19) | 0.49 |
| 11-02 | Gp4 Focus 2 | g.chr19:41626351G>A  | Missense Mutation | CYP2F1   | p.R145Q  | cytochrome P450, famil   | 35 (0.00)  | 27 (0.19) | 0.49 |
| 11-02 | Gp4 Focus 2 | g.chr7:6204606G>A    | Missense Mutation | CYTH3    | p.T390M  | cytohesin 3              | 32 (0.00)  | 18 (0.28) | 0.99 |
| 11-02 | Gp4 Focus 2 | g.chr5:39394394G>A   | Missense Mutation | DAB2     | p.T10I   | Dab, mitogen-responsiv   | 71 (0.00)  | 19 (0.32) | 0.84 |
| 11-02 | Gp4 Focus 2 | g.chr9:124338203G>A  | Intron            | DAB2IP   |          | DAB2 interacting protei  | 27 (0.00)  | 12 (0.67) | 1.39 |
| 11-02 | Gp4 Focus 2 | g.chr9:124347725C>T  | Intron            | DAB2IP   |          | DAB2 interacting protei  | 29 (0.00)  | 19 (0.26) | 0.55 |
| 11-02 | Gp4 Focus 2 | g.chr9:124356975G>A  | Intron            | DAB2IP   |          | DAB2 interacting protei  | 32 (0.00)  | 33 (0.24) | 0.51 |
| 11-02 | Gp4 Focus 2 | g.chr9:124362970G>A  | Intron            | DAB2IP   |          | DAB2 interacting protei  | 104 (0.00) | 21 (0.24) | 0.50 |
| 11-02 | Gp4 Focus 2 | g.chr9:124374100G>A  | Intron            | DAB2IP   |          | DAB2 interacting protei  | 33 (0.00)  | 24 (0.21) | 0.43 |
| 11-02 | Gp4 Focus 2 | g.chr9:124376296G>A  | Intron            | DAB2IP   |          | DAB2 interacting protei  | 59 (0.00)  | 26 (0.38) | 0.80 |
| 11-02 | Gp4 Focus 2 | g.chr9:124377804A>G  | Intron            | DAB2IP   |          | DAB2 interacting protei  | 51 (0.00)  | 41 (0.20) | 0.41 |
| 11-02 | Gp4 Focus 2 | g.chr9:124381414G>A  | Intron            | DAB2IP   |          | DAB2 interacting protei  | 111 (0.00) | 82 (0.33) | 0.69 |
| 11-02 | Gp4 Focus 2 | g.chr9:124391745C>T  | Intron            | DAB2IP   |          | DAB2 interacting protei  | 47 (0.02)  | 25 (0.40) | 0.83 |
| 11-02 | Gp4 Focus 2 | g.chr9:124400283C>A  | Intron            | DAB2IP   |          | DAB2 interacting protei  | 52 (0.00)  | 21 (0.29) | 0.60 |
| 11-02 | Gp4 Focus 2 | g.chr9:124401286G>A  | Intron            | DAB2IP   |          | DAB2 interacting protei  | 35 (0.00)  | 31 (0.29) | 0.61 |
| 11-02 | Gp4 Focus 2 | g.chr9:124409272G>A  | Intron            | DAB2IP   |          | DAB2 interacting protei  | 63 (0.00)  | 22 (0.23) | 0.47 |
| 11-02 | Gp4 Focus 2 | g.chr9:124419669C>T  | Intron            | DAB2IP   |          | DAB2 interacting protei  | 60 (0.00)  | 21 (0.24) | 0.50 |

|       |             |                     |                   |         |          |                          |            |           |      |
|-------|-------------|---------------------|-------------------|---------|----------|--------------------------|------------|-----------|------|
| 11-02 | Gp4 Focus 2 | g.chr9:124425358G>C | Intron            | DAB2IP  |          | DAB2 interacting protei  | 68 (0.00)  | 61 (0.23) | 0.48 |
| 11-02 | Gp4 Focus 2 | g.chr9:124434305C>T | Intron            | DAB2IP  |          | DAB2 interacting protei  | 22 (0.00)  | 33 (0.39) | 0.82 |
| 11-02 | Gp4 Focus 2 | g.chr9:124436280G>A | Intron            | DAB2IP  |          | DAB2 interacting protei  | 22 (0.00)  | 30 (0.27) | 0.56 |
| 11-02 | Gp4 Focus 2 | g.chr9:124436998C>A | Intron            | DAB2IP  |          | DAB2 interacting protei  | 30 (0.00)  | 23 (0.22) | 0.45 |
| 11-02 | Gp4 Focus 2 | g.chr9:124445855G>A | Intron            | DAB2IP  |          | DAB2 interacting protei  | 39 (0.00)  | 44 (0.61) | 1.28 |
| 11-02 | Gp4 Focus 2 | g.chr9:124453355G>A | Intron            | DAB2IP  |          | DAB2 interacting protei  | 34 (0.00)  | 20 (0.45) | 0.94 |
| 11-02 | Gp4 Focus 2 | g.chr9:124472571G>A | Intron            | DAB2IP  |          | DAB2 interacting protei  | 17 (0.00)  | 39 (0.41) | 0.86 |
| 11-02 | Gp4 Focus 2 | g.chr9:124481973C>T | Intron            | DAB2IP  |          | DAB2 interacting protei  | 34 (0.03)  | 43 (0.37) | 0.78 |
| 11-02 | Gp4 Focus 2 | g.chr9:124484396G>A | Intron            | DAB2IP  |          | DAB2 interacting protei  | 52 (0.00)  | 27 (0.22) | 0.46 |
| 11-02 | Gp4 Focus 2 | g.chr9:124489445C>T | Intron            | DAB2IP  |          | DAB2 interacting protei  | 62 (0.00)  | 26 (0.81) | 1.69 |
| 11-02 | Gp4 Focus 2 | g.chr9:124496740G>A | Intron            | DAB2IP  |          | DAB2 interacting protei  | 31 (0.00)  | 36 (0.22) | 0.46 |
| 11-02 | Gp4 Focus 2 | g.chr6:168694852C>A | Missense Mutation | DACT2   | p.K252N  | dishevelled-binding ant  | 24 (0.00)  | 29 (0.17) | 0.46 |
| 11-02 | Gp4 Focus 2 | g.chr6:168708956C>A | Missense Mutation | DACT2   | p.S494I  | dishevelled-binding ant  | 15 (0.00)  | 24 (0.33) | 0.89 |
| 11-02 | Gp4 Focus 2 | g.chr15:64218145C>T | Silent            | DAPK2   | p.E269E  | death-associated protein | 82 (0.00)  | 34 (0.26) | 0.71 |
| 11-02 | Gp4 Focus 2 | g.chr1:159175928G>A | Silent            | DARC    | p.K233K  |                          | 26 (0.00)  | 29 (0.31) | 0.83 |
| 11-02 | Gp4 Focus 2 | g.chr1:159176240G>A | Silent            | DARC    | p.*337*  |                          | 35 (0.00)  | 65 (0.92) | 2.46 |
| 11-02 | Gp4 Focus 2 | g.chr1:173810084G>A | Silent            | DARS2   | p.V367V  | aspartyl-tRNA syntheta   | 29 (0.00)  | 21 (0.38) | 1.02 |
| 11-02 | Gp4 Focus 2 | g.chr17:42800290G>A | Missense Mutation | DBF4B   | p.G42D   | DBF4 zinc finger B       | 30 (0.00)  | 11 (0.45) | 1.21 |
| 11-02 | Gp4 Focus 2 | g.chr8:104438325G>A | Silent            | DCAF13  | p.G292G  | DDB1 and CUL4 associ     | 87 (0.00)  | 38 (0.32) | 1.08 |
| 11-02 | Gp4 Focus 2 | g.chr14:69521357G>A | Silent            | DCAF5   | p.T682T  | DDB1 and CUL4 associ     | 38 (0.00)  | 34 (0.21) | 0.55 |
| 11-02 | Gp4 Focus 2 | g.chr14:69522212C>T | Silent            | DCAF5   | p.G397G  | DDB1 and CUL4 associ     | 24 (0.00)  | 33 (0.21) | 0.57 |
| 11-02 | Gp4 Focus 2 | g.chr17:61662575G>A | Silent            | DCAF7   | p.V47V   | DDB1 and CUL4 associ     | 18 (0.00)  | 33 (0.42) | 1.13 |
| 11-02 | Gp4 Focus 2 | g.chr18:50592476G>T | Missense Mutation | DCC     | p.V56L   | DCC netrin 1 receptor    | 48 (0.00)  | 22 (0.50) | 1.33 |
| 11-02 | Gp4 Focus 2 | g.chr11:31128378G>A | Nonsense Mutation | DCDC1   | p.Q573*  | doublecortin domain co   | 169 (0.00) | 26 (0.19) | 0.51 |
| 11-02 | Gp4 Focus 2 | g.chr11:6645109G>A  | Missense Mutation | DCHS1   | p.P2600S | dachsous cadherin-relat  | 48 (0.00)  | 33 (0.39) | 1.05 |
| 11-02 | Gp4 Focus 2 | g.chr11:6652927C>T  | Missense Mutation | DCHS1   | p.V1199I | dachsous cadherin-relat  | 24 (0.00)  | 22 (0.41) | 1.09 |
| 11-02 | Gp4 Focus 2 | g.chr4:155298497C>T | Missense Mutation | DCHS2   | p.D112N  | dachsous cadherin-relat  | 22 (0.00)  | 29 (0.59) | 1.56 |
| 11-02 | Gp4 Focus 2 | g.chr1:114450746C>G | Silent            | DCLRE1B | p.S157S  | DNA cross-link repair    | 154 (0.00) | 14 (0.43) | 0.90 |
| 11-02 | Gp4 Focus 2 | g.chr1:155007129G>A | Splice Site       | DCST1   | p.G63D   | DC-STAMP domain co       | 134 (0.00) | 19 (0.53) | 1.40 |
| 11-02 | Gp4 Focus 2 | g.chr11:61081878G>A | Silent            | DDB1    | p.N497N  | damage-specific DNA b    | 57 (0.00)  | 50 (0.18) | 0.48 |
| 11-02 | Gp4 Focus 2 | g.chr11:61099161G>A | Missense Mutation | DDB1    | p.H22Y   | damage-specific DNA b    | 27 (0.00)  | 28 (0.36) | 0.95 |
| 11-02 | Gp4 Focus 2 | g.chr8:38091962G>A  | Missense Mutation | DDHD2   | p.V91I   | DDHD domain containi     | 100 (0.00) | 36 (0.25) | 0.81 |
| 11-02 | Gp4 Focus 2 | g.chr1:20979134G>A  | Missense Mutation | DDOST   | p.H384Y  | dolichyl-diphosphoolig   | 34 (0.03)  | 16 (0.44) | 1.17 |
| 11-02 | Gp4 Focus 2 | g.chr1:20979153G>A  | Silent            | DDOST   | p.Y377Y  | dolichyl-diphosphoolig   | 36 (0.00)  | 19 (0.63) | 1.68 |
| 11-02 | Gp4 Focus 2 | g.chr10:70723195G>A | Silent            | DDX21   | p.L252L  | DEAD (Asp-Glu-Ala-A      | 35 (0.00)  | 74 (0.64) | 1.69 |

|       |             |                      |                   |         |          |                                     |           |      |
|-------|-------------|----------------------|-------------------|---------|----------|-------------------------------------|-----------|------|
| 11-02 | Gp4 Focus 2 | g.chr20:47855812G>A  | Missense Mutation | DDX27   | p.A643T  | DEAD (Asp-Glu-Ala-A 19 (0.00)       | 11 (0.55) | 1.45 |
| 11-02 | Gp4 Focus 2 | g.chr20:47858438G>A  | Missense Mutation | DDX27   | p.A667T  | DEAD (Asp-Glu-Ala-A 39 (0.00)       | 23 (0.22) | 0.58 |
| 11-02 | Gp4 Focus 2 | g.chr20:47860219G>A  | Missense Mutation | DDX27   | p.G784E  | DEAD (Asp-Glu-Ala-A 51 (0.02)       | 42 (0.40) | 1.08 |
| 11-02 | Gp4 Focus 2 | g.chr9:135522266C>T  | Missense Mutation | DDX31   | p.V488I  | DEAD (Asp-Glu-Ala-A 41 (0.00)       | 34 (0.15) | 0.39 |
| 11-02 | Gp4 Focus 2 | g.chr17:61885210G>A  | Missense Mutation | DDX42   | p.D325N  | DEAD (Asp-Glu-Ala-A 51 (0.00)       | 15 (0.53) | 1.42 |
| 11-02 | Gp4 Focus 2 | g.chr17:61889308C>T  | Missense Mutation | DDX42   | p.T472I  | DEAD (Asp-Glu-Ala-A 81 (0.00)       | 25 (0.28) | 0.75 |
| 11-02 | Gp4 Focus 2 | g.chr12:12978984G>A  | Silent            | DDX47   | p.K362K  | DEAD (Asp-Glu-Ala-A 18 (0.00)       | 11 (0.45) | 1.21 |
| 11-02 | Gp4 Focus 2 | g.chr12:124102388C>T | Missense Mutation | DDX55   | p.S378L  | DEAD (Asp-Glu-Ala-A 16 (0.00)       | 40 (0.42) | 1.13 |
| 11-02 | Gp4 Focus 2 | g.chr9:118138994G>A  | Splice Site       | DEC1    | p.V5I    | deleted in esophageal ca53 (0.00)   | 18 (0.28) | 0.58 |
| 11-02 | Gp4 Focus 2 | g.chr6:35278334G>C   | Missense Mutation | DEF6    | p.M112I  | differentially expressed 80 (0.00)  | 17 (0.29) | 0.78 |
| 11-02 | Gp4 Focus 2 | g.chr20:210288C>T    | Missense Mutation | DEFB129 | p.T143I  | defensin, beta 129 42 (0.00)        | 19 (0.37) | 0.98 |
| 11-02 | Gp4 Focus 2 | g.chr9:126520005C>T  | Silent            | DENND1A | p.A93A   | DENN/MADD domain 25 (0.00)          | 26 (0.27) | 0.72 |
| 11-02 | Gp4 Focus 2 | g.chr7:140302059T>A  | Nonsense Mutation | DENND2A | p.K47*   | DENN/MADD domain 23 (0.00)          | 21 (0.33) | 0.89 |
| 11-02 | Gp4 Focus 2 | g.chr1:115151333G>A  | Nonsense Mutation | DENND2C | p.Q454*  | DENN/MADD domain 57 (0.00)          | 21 (0.29) | 0.60 |
| 11-02 | Gp4 Focus 2 | g.chr15:65960315C>T  | Missense Mutation | DENND4A | p.R1601K | DENN/MADD domain 39 (0.00)          | 23 (0.35) | 0.93 |
| 11-02 | Gp4 Focus 2 | g.chr22:32198751C>T  | Silent            | DEPDC5  | p.I336I  | DEP domain containing 22 (0.00)     | 13 (0.46) | 1.23 |
| 11-02 | Gp4 Focus 2 | g.chr22:32302437C>T  | Missense Mutation | DEPDC5  | p.T1580M | DEP domain containing 21 (0.00)     | 22 (0.23) | 0.61 |
| 11-02 | Gp4 Focus 2 | g.chr22:20073958G>A  | Missense Mutation | DGCR8   | p.D158N  | DGCR8 microprocessor 59 (0.02)      | 35 (0.17) | 0.46 |
| 11-02 | Gp4 Focus 2 | g.chr2:169938385G>T  | Missense Mutation | DHRS9   | p.K98N   | dehydrogenase/reductas 30 (0.00)    | 22 (0.32) | 0.85 |
| 11-02 | Gp4 Focus 2 | g.chr5:54603384C>T   | Silent            | DHX29   | p.K6K    | DEAH (Asp-Glu-Ala-H 34 (0.00)       | 19 (0.32) | 1.05 |
| 11-02 | Gp4 Focus 2 | g.chr20:37621054G>A  | Missense Mutation | DHX35   | p.G190S  | DEAH (Asp-Glu-Ala-H 72 (0.00)       | 27 (0.30) | 0.79 |
| 11-02 | Gp4 Focus 2 | g.chr2:39029968C>A   | Silent            | DHX57   | p.V1302V | DEAH (Asp-Glu-Ala-A 63 (0.00)       | 30 (0.23) | 0.62 |
| 11-02 | Gp4 Focus 2 | g.chr17:41577344C>T  | Silent            | DHX8    | p.S473S  | DEAH (Asp-Glu-Ala-H 100 (0.00)      | 46 (0.28) | 0.75 |
| 11-02 | Gp4 Focus 2 | g.chr5:140953174G>A  | Missense Mutation | DIAPH1  | p.P748L  | diaphanous-related form 16 (0.00)   | 24 (0.21) | 0.56 |
| 11-02 | Gp4 Focus 2 | g.chr1:210012431G>A  | Missense Mutation | DIEXF   | p.E414K  | digestive organ expansion 81 (0.01) | 40 (0.38) | 1.00 |
| 11-02 | Gp4 Focus 2 | g.chr12:51108330C>T  | Silent            | DIP2B   | p.C934C  | DIP2 disco-interacting p 30 (0.00)  | 27 (0.19) | 0.49 |
| 11-02 | Gp4 Focus 2 | g.chr1:68512763G>A   | Missense Mutation | DIRAS3  | p.T73I   | DIRAS family, GTP-bir 44 (0.00)     | 24 (0.58) | 1.56 |
| 11-02 | Gp4 Focus 2 | g.chr3:122545834A>G  | Missense Mutation | DIRC2   | p.N209D  | disrupted in renal carcin 55 (0.00) | 15 (0.40) | 1.07 |
| 11-02 | Gp4 Focus 2 | g.chr13:73349381C>T  | Missense Mutation | DIS3    | p.D289N  | DIS3 exosome endoribo 43 (0.00)     | 17 (0.35) | 0.94 |
| 11-02 | Gp4 Focus 2 | g.chr13:73349395C>T  | Missense Mutation | DIS3    | p.G284D  | DIS3 exosome endoribo 43 (0.00)     | 18 (0.28) | 0.74 |
| 11-02 | Gp4 Focus 2 | g.chr2:232995410C>G  | Missense Mutation | DIS3L2  | p.S228C  | DIS3 like 3'-5' exoribon 29 (0.00)  | 31 (0.26) | 0.69 |
| 11-02 | Gp4 Focus 2 | g.chr3:38158485G>A   | Missense Mutation | DLEC1   | p.S1400N | deleted in lung and esop 35 (0.00)  | 18 (0.44) | 1.19 |
| 11-02 | Gp4 Focus 2 | g.chr14:75360096G>A  | Missense Mutation | DLST    | p.G214E  | dihydrolipoamide S-suc 35 (0.00)    | 24 (0.29) | 0.78 |
| 11-02 | Gp4 Focus 2 | g.chr10:124390744G>A | Missense Mutation | DMBT1   | p.G1969D | deleted in malignant bra 58 (0.00)  | 29 (0.34) | 0.92 |
| 11-02 | Gp4 Focus 2 | g.chr10:124402681C>T | Missense Mutation | DMBT1   | p.L2337F | deleted in malignant bra 21 (0.00)  | 31 (0.16) | 0.43 |

|       |             |                      |                   |         |          |                           |            |           |      |
|-------|-------------|----------------------|-------------------|---------|----------|---------------------------|------------|-----------|------|
| 11-02 | Gp4 Focus 2 | g.chr7:86822559C>T   | Nonsense Mutation | DMTF1   | p.Q514*  | cyclin D binding myb-li   | 87 (0.00)  | 20 (0.75) | 2.00 |
| 11-02 | Gp4 Focus 2 | g.chr15:51772264C>T  | Missense Mutation | DMXL2   | p.A2213T | Dmx-like 2                | 114 (0.00) | 36 (0.25) | 0.67 |
| 11-02 | Gp4 Focus 2 | g.chr15:51791707C>T  | Silent            | DMXL2   | p.L1238L | Dmx-like 2                | 54 (0.00)  | 16 (0.31) | 0.83 |
| 11-02 | Gp4 Focus 2 | g.chr16:84203534G>C  | Missense Mutation | DNAAF1  | p.G367A  | dynein, axonemal, assen   | 35 (0.00)  | 28 (0.21) | 0.57 |
| 11-02 | Gp4 Focus 2 | g.chr12:124330680G>A | Silent            | DNAH10  | p.R1813R | dynein, axonemal, heav    | 33 (0.00)  | 32 (0.22) | 0.58 |
| 11-02 | Gp4 Focus 2 | g.chr12:124364270C>T | Silent            | DNAH10  | p.F2734F | dynein, axonemal, heav    | 80 (0.00)  | 63 (0.17) | 0.47 |
| 11-02 | Gp4 Focus 2 | g.chr12:124401172G>T | Missense Mutation | DNAH10  | p.D3513Y | dynein, axonemal, heav    | 37 (0.00)  | 18 (0.33) | 0.89 |
| 11-02 | Gp4 Focus 2 | g.chr7:21657395G>C   | Splice Site       | DNAH11  | p.G1418G | dynein, axonemal, heav    | 26 (0.00)  | 32 (0.25) | 0.67 |
| 11-02 | Gp4 Focus 2 | g.chr1:225512031G>A  | Silent            | DNAH14  | p.L2455L | dynein, axonemal, heav    | 44 (0.00)  | 11 (0.45) | 1.21 |
| 11-02 | Gp4 Focus 2 | g.chr1:225580109G>A  | Missense Mutation | DNAH14  | p.V3373I | dynein, axonemal, heav    | 38 (0.00)  | 22 (0.32) | 0.85 |
| 11-02 | Gp4 Focus 2 | g.chr16:20944638G>A  | Silent            | DNAH3   | p.D4063D | dynein, axonemal, heav    | 36 (0.00)  | 45 (0.16) | 0.41 |
| 11-02 | Gp4 Focus 2 | g.chr16:20946732C>T  | Missense Mutation | DNAH3   | p.V3979I | dynein, axonemal, heav    | 30 (0.00)  | 20 (0.35) | 0.93 |
| 11-02 | Gp4 Focus 2 | g.chr5:13862686C>G   | Missense Mutation | DNAH5   | p.L1589F | dynein, axonemal, heav    | 36 (0.00)  | 22 (0.23) | 0.61 |
| 11-02 | Gp4 Focus 2 | g.chr5:13867915C>A   | Missense Mutation | DNAH5   | p.D1341Y | dynein, axonemal, heav    | 42 (0.00)  | 42 (0.31) | 0.83 |
| 11-02 | Gp4 Focus 2 | g.chr2:84851625C>T   | Silent            | DNAH6   | p.L1412L | dynein, axonemal, heav    | 78 (0.00)  | 22 (0.41) | 1.09 |
| 11-02 | Gp4 Focus 2 | g.chr17:11865210G>A  | Missense Mutation | DNAH9   | p.M4214I | dynein, axonemal, heav    | 42 (0.00)  | 36 (0.47) | 1.26 |
| 11-02 | Gp4 Focus 2 | g.chr16:4496885A>T   | Splice Site       | DNAJA3  |          | DnaJ (Hsp40) homolog,     | 23 (0.00)  | 16 (0.31) | 1.00 |
| 11-02 | Gp4 Focus 2 | g.chr3:186299275T>C  | Missense Mutation | DNAJB11 | p.V191A  | DnaJ (Hsp40) homolog,     | 63 (0.00)  | 38 (0.24) | 0.63 |
| 11-02 | Gp4 Focus 2 | g.chr2:183593648G>A  | Missense Mutation | DNAJC10 | p.G187D  | DnaJ (Hsp40) homolog,     | 42 (0.00)  | 28 (0.21) | 0.57 |
| 11-02 | Gp4 Focus 2 | g.chr1:15888740G>A   | Missense Mutation | DNAJC16 | p.V420M  | DnaJ (Hsp40) homolog,     | 26 (0.00)  | 38 (0.18) | 0.49 |
| 11-02 | Gp4 Focus 2 | g.chr1:15892453C>T   | Silent            | DNAJC16 | p.A546A  | DnaJ (Hsp40) homolog,     | 96 (0.00)  | 23 (0.35) | 0.93 |
| 11-02 | Gp4 Focus 2 | g.chr5:34945042G>A   | Missense Mutation | DNAJC21 | p.E352K  | DnaJ (Hsp40) homolog,     | 148 (0.00) | 35 (0.14) | 0.38 |
| 11-02 | Gp4 Focus 2 | g.chr13:96443131G>A  | Missense Mutation | DNAJC3  | p.M403I  | DnaJ (Hsp40) homolog,     | 35 (0.00)  | 25 (0.36) | 0.96 |
| 11-02 | Gp4 Focus 2 | g.chr1:84864291C>T   | Missense Mutation | DNASE2B | p.A15V   | deoxyribonuclease II be   | 56 (0.00)  | 40 (0.17) | 0.47 |
| 11-02 | Gp4 Focus 2 | g.chr11:6532621C>T   | Missense Mutation | DNHD1   | p.H452Y  | dynein heavy chain dom    | 82 (0.00)  | 43 (0.35) | 0.93 |
| 11-02 | Gp4 Focus 2 | g.chr15:84958382C>T  | RNA               | DNM1P51 |          | DNM1 pseudogene 51        | 31 (0.00)  | 33 (0.36) | 0.97 |
| 11-02 | Gp4 Focus 2 | g.chr10:101639678G>A | Missense Mutation | DNMBP   | p.P1480S | dynamamin binding proteir | 42 (0.00)  | 16 (0.31) | 0.83 |
| 11-02 | Gp4 Focus 2 | g.chr19:10270697G>A  | Silent            | DNMT1   | p.S346S  | DNA (cytosine-5-)-metl    | 21 (0.00)  | 37 (0.43) | 1.15 |
| 11-02 | Gp4 Focus 2 | g.chr3:51393891C>T   | Silent            | DOCK3   | p.I1490I | dedicator of cytokinesis  | 59 (0.00)  | 48 (0.29) | 0.78 |
| 11-02 | Gp4 Focus 2 | g.chr7:111430587G>A  | Missense Mutation | DOCK4   | p.L1081F | dedicator of cytokinesis  | 64 (0.00)  | 30 (0.83) | 2.22 |
| 11-02 | Gp4 Focus 2 | g.chr8:25174610C>T   | Missense Mutation | DOCK5   | p.T469M  | dedicator of cytokinesis  | 65 (0.00)  | 47 (0.21) | 0.57 |
| 11-02 | Gp4 Focus 2 | g.chr9:449847G>A     | Missense Mutation | DOCK8   | p.V1861I | dedicator of cytokinesis  | 67 (0.00)  | 21 (0.24) | 0.63 |
| 11-02 | Gp4 Focus 2 | g.chr20:53227021G>A  | Missense Mutation | DOK5    | p.E232K  | docking protein 5         | 29 (0.00)  | 30 (0.37) | 0.98 |
| 11-02 | Gp4 Focus 2 | g.chr21:37642341G>A  | Missense Mutation | DOPEY2  | p.G1840R | dopey family member 2     | 98 (0.00)  | 28 (0.18) | 0.48 |
| 11-02 | Gp4 Focus 2 | g.chr16:68012408G>A  | Missense Mutation | DPEP3   | p.S204L  | dipeptidase 3             | 37 (0.03)  | 51 (0.25) | 0.68 |

|       |             |                      |                       |         |          |                                        |            |           |      |
|-------|-------------|----------------------|-----------------------|---------|----------|----------------------------------------|------------|-----------|------|
| 11-02 | Gp4 Focus 2 | g.chr7:154172098G>A  | Missense Mutation     | DPP6    | p.D145N  | dipeptidyl-peptidase 6                 | 23 (0.00)  | 25 (0.48) | 1.28 |
| 11-02 | Gp4 Focus 2 | g.chr7:154645512G>A  | Silent                | DPP6    | p.T563T  | dipeptidyl-peptidase 6                 | 23 (0.00)  | 32 (0.22) | 0.58 |
| 11-02 | Gp4 Focus 2 | g.chr7:34981457G>A   | Missense Mutation     | DPY19L1 | p.L464F  | dpy-19-like 1 (C. elegans)             | 49 (0.00)  | 11 (0.45) | 1.21 |
| 11-02 | Gp4 Focus 2 | g.chr19:32923641C>T  | Missense Mutation     | DPY19L3 | p.S86L   | dpy-19-like 3 (C. elegans)             | 33 (0.00)  | 31 (0.35) | 0.95 |
| 11-02 | Gp4 Focus 2 | g.chr19:32959644C>T  | Missense Mutation     | DPY19L3 | p.P541L  | dpy-19-like 3 (C. elegans)             | 60 (0.00)  | 23 (0.39) | 1.04 |
| 11-02 | Gp4 Focus 2 | g.chr8:26509931G>A   | Silent                | DPYSL2  | p.K480K  | dihydropyrimidinase-like 2             | 22 (0.00)  | 26 (0.46) | 1.23 |
| 11-02 | Gp4 Focus 2 | g.chr2:26647241G>A   | Silent                | DRC1    | p.L153L  | dynein regulatory component 37         | 37 (0.00)  | 43 (0.16) | 0.43 |
| 11-02 | Gp4 Focus 2 | g.chr5:174868988G>A  | Missense Mutation     | DRD1    | p.S372F  | dopamine receptor D1                   | 24 (0.00)  | 10 (0.60) | 1.60 |
| 11-02 | Gp4 Focus 2 | g.chrX:100486627C>A  | De novo Start InFrame | DRP2    |          | dystrophin related protein 19          | 19 (0.00)  | 14 (0.36) | 0.80 |
| 11-02 | Gp4 Focus 2 | g.chr18:28650802G>A  | Silent                | DSC2    | p.L714L  | desmocollin 2                          | 72 (0.00)  | 25 (0.32) | 0.85 |
| 11-02 | Gp4 Focus 2 | g.chr11:117391931G>A | Missense Mutation     | DSCAML1 | p.A436V  | Down syndrome cell adhesion molecule 1 | 29 (0.00)  | 57 (0.16) | 0.42 |
| 11-02 | Gp4 Focus 2 | g.chr11:117651256C>T | Missense Mutation     | DSCAML1 | p.E166K  | Down syndrome cell adhesion molecule 1 | 36 (0.00)  | 37 (0.27) | 0.72 |
| 11-02 | Gp4 Focus 2 | g.chr6:116752219G>A  | Missense Mutation     | DSE     | p.G258E  | dermatan sulfate epimerase 22          | 22 (0.00)  | 25 (0.32) | 0.85 |
| 11-02 | Gp4 Focus 2 | g.chr18:29122565C>T  | Missense Mutation     | DSG2    | p.T695M  | desmoglein 2                           | 34 (0.00)  | 60 (0.17) | 0.44 |
| 11-02 | Gp4 Focus 2 | g.chr18:29055917C>A  | Nonsense Mutation     | DSG3    | p.C898*  | desmoglein 3                           | 40 (0.00)  | 40 (0.15) | 0.40 |
| 11-02 | Gp4 Focus 2 | g.chr6:7579772G>A    | Missense Mutation     | DSP     | p.E1117K | desmoplakin                            | 52 (0.00)  | 11 (0.64) | 1.70 |
| 11-02 | Gp4 Focus 2 | g.chr6:7581069G>C    | Missense Mutation     | DSP     | p.R1549T | desmoplakin                            | 113 (0.00) | 27 (0.52) | 1.38 |
| 11-02 | Gp4 Focus 2 | g.chr4:88535003G>A   | Missense Mutation     | DSPP    | p.E397K  | dentin sialophosphoprotein 32          | 32 (0.00)  | 17 (0.82) | 2.20 |
| 11-02 | Gp4 Focus 2 | g.chr6:56473419G>A   | Nonsense Mutation     | DST     | p.Q1792* | dystonin                               | 121 (0.00) | 35 (0.23) | 0.61 |
| 11-02 | Gp4 Focus 2 | g.chr15:45455732C>T  | Silent                | DUOX1   | p.I1417I | dual oxidase 1                         | 27 (0.00)  | 35 (0.29) | 0.76 |
| 11-02 | Gp4 Focus 2 | g.chr12:12640110C>A  | Missense Mutation     | DUSP16  | p.Q181H  | dual specificity phosphatase 21        | 21 (0.00)  | 19 (0.32) | 0.84 |
| 11-02 | Gp4 Focus 2 | g.chr12:12653603C>T  | Silent                | DUSP16  | p.E127E  | dual specificity phosphatase 34        | 34 (0.00)  | 30 (0.40) | 1.07 |
| 11-02 | Gp4 Focus 2 | g.chr1:159752037C>A  | Missense Mutation     | DUSP23  | p.A121D  | dual specificity phosphatase 19        | 19 (0.00)  | 12 (0.58) | 1.56 |
| 11-02 | Gp4 Focus 2 | g.chr12:89743232C>G  | Silent                | DUSP6   | p.S315S  | dual specificity phosphatase 82        | 82 (0.00)  | 22 (0.27) | 0.73 |
| 11-02 | Gp4 Focus 2 | g.chr10:82122763G>A  | Missense Mutation     | DYDC2   | p.M82I   | DPY30 domain containing protein 16     | 16 (0.00)  | 20 (0.70) | 1.87 |
| 11-02 | Gp4 Focus 2 | g.chr18:46956642G>A  | Silent                | DYM     | p.F41F   | dymeclin                               | 61 (0.00)  | 15 (0.47) | 1.24 |
| 11-02 | Gp4 Focus 2 | g.chr14:102477094C>T | Silent                | DYNC1H1 | p.V2141V | dynein, cytoplasmic 1, heavy chain 23  | 23 (0.00)  | 18 (0.33) | 0.89 |
| 11-02 | Gp4 Focus 2 | g.chr3:108392989G>A  | Missense Mutation     | DZIP3   | p.C885Y  | DAZ interacting zinc finger protein 57 | 57 (0.00)  | 21 (0.33) | 0.89 |
| 11-02 | Gp4 Focus 2 | g.chr16:67228797G>A  | Missense Mutation     | E2F4    | p.R241H  | E2F transcription factor 50            | 50 (0.00)  | 18 (0.33) | 0.89 |
| 11-02 | Gp4 Focus 2 | g.chr12:77419591G>A  | Missense Mutation     | E2F7    | p.T771I  | E2F transcription factor 24            | 24 (0.00)  | 16 (0.44) | 1.17 |
| 11-02 | Gp4 Focus 2 | g.chr12:77419621G>A  | Missense Mutation     | E2F7    | p.S761F  | E2F transcription factor 24            | 24 (0.00)  | 21 (0.48) | 1.27 |
| 11-02 | Gp4 Focus 2 | g.chr16:23546271G>A  | Missense Mutation     | EARS2   | p.A299V  | glutamyl-tRNA synthetase 16            | 16 (0.00)  | 14 (0.50) | 1.33 |
| 11-02 | Gp4 Focus 2 | g.chr16:23555888G>A  | Silent                | EARS2   | p.P144P  | glutamyl-tRNA synthetase 15            | 15 (0.00)  | 41 (0.46) | 1.24 |
| 11-02 | Gp4 Focus 2 | g.chr16:67917511G>A  | Missense Mutation     | EDC4    | p.C1297Y | enhancer of mRNA decapping 76          | 76 (0.00)  | 99 (0.17) | 0.46 |
| 11-02 | Gp4 Focus 2 | g.chr4:148407166G>A  | Missense Mutation     | EDNRA   | p.M111I  | endothelin receptor type 105           | 105 (0.00) | 17 (0.35) | 0.94 |

|       |             |                      |                   |          |          |                                     |           |      |
|-------|-------------|----------------------|-------------------|----------|----------|-------------------------------------|-----------|------|
| 11-02 | Gp4 Focus 2 | g.chr13:78477460C>T  | Missense Mutation | EDNRB    | p.G301E  | endothelin receptor type 148 (0.01) | 40 (0.23) | 0.60 |
| 11-02 | Gp4 Focus 2 | g.chr3:127965713C>T  | Silent            | EEFSEC   | p.I117I  | eukaryotic elongation fa51 (0.00)   | 84 (0.15) | 0.41 |
| 11-02 | Gp4 Focus 2 | g.chr14:90420987G>A  | Silent            | EFCAB11  | p.A6A    | EF-hand calcium bindin 15 (0.00)    | 15 (0.40) | 1.07 |
| 11-02 | Gp4 Focus 2 | g.chr3:168530246G>A  | RNA               | EGFEM1P  |          | EGF-like and EMI dom:46 (0.00)      | 41 (0.44) | 1.17 |
| 11-02 | Gp4 Focus 2 | g.chr5:38448414G>A   | Missense Mutation | EGFLAM   | p.A826T  | EGF-like, fibronectin ty 73 (0.00)  | 34 (0.15) | 0.39 |
| 11-02 | Gp4 Focus 2 | g.chr10:64573942G>A  | Silent            | EGR2     | p.C152C  | early growth response 2 16 (0.00)   | 37 (0.19) | 0.60 |
| 11-02 | Gp4 Focus 2 | g.chr11:65350884C>T  | Missense Mutation | EHBP1L1  | p.S914F  | EH domain binding prot26 (0.00)     | 13 (0.62) | 1.64 |
| 11-02 | Gp4 Focus 2 | g.chr2:88870545G>A   | Silent            | EIF2AK3  | p.F944F  | eukaryotic translation in97 (0.00)  | 16 (0.38) | 1.00 |
| 11-02 | Gp4 Focus 2 | g.chr1:45340432C>T   | Missense Mutation | EIF2B3   | p.V374I  | eukaryotic translation in37 (0.00)  | 30 (0.17) | 0.44 |
| 11-02 | Gp4 Focus 2 | g.chr1:45340474G>A   | Missense Mutation | EIF2B3   | p.P360S  | eukaryotic translation in31 (0.00)  | 28 (0.32) | 0.86 |
| 11-02 | Gp4 Focus 2 | g.chr2:27591320C>T   | Missense Mutation | EIF2B4   | p.R170Q  | eukaryotic translation in29 (0.00)  | 22 (0.23) | 0.61 |
| 11-02 | Gp4 Focus 2 | g.chr11:8017509C>T   | Silent            | EIF3F    | p.T338T  | eukaryotic translation in221 (0.00) | 29 (0.52) | 1.38 |
| 11-02 | Gp4 Focus 2 | g.chr17:78111219C>A  | Nonsense Mutation | EIF4A3   | p.E317*  | eukaryotic translation in 18 (0.00) | 45 (0.40) | 1.07 |
| 11-02 | Gp4 Focus 2 | g.chr11:10820603G>T  | Missense Mutation | EIF4G2   | p.A865D  | eukaryotic translation in88 (0.00)  | 15 (0.47) | 1.24 |
| 11-02 | Gp4 Focus 2 | g.chr1:21268299G>A   | Missense Mutation | EIF4G3   | p.P400S  | eukaryotic translation in36 (0.00)  | 29 (0.45) | 1.20 |
| 11-02 | Gp4 Focus 2 | g.chr20:33867431G>A  | Silent            | EIF6     | p.F222F  | eukaryotic translation in41 (0.00)  | 57 (0.16) | 0.42 |
| 11-02 | Gp4 Focus 2 | g.chr13:41508028T>A  | Nonsense Mutation | ELF1     | p.K465*  | E74-like factor 1 (ets do41 (0.00)  | 53 (0.34) | 0.91 |
| 11-02 | Gp4 Focus 2 | g.chr13:41517991G>A  | Silent            | ELF1     | p.N200N  | E74-like factor 1 (ets do32 (0.00)  | 35 (0.14) | 0.38 |
| 11-02 | Gp4 Focus 2 | g.chr12:96617396C>T  | Nonsense Mutation | ELK3     | p.Q18*   | ELK3, ETS-domain pro 35 (0.00)      | 22 (0.23) | 0.61 |
| 11-02 | Gp4 Focus 2 | g.chr7:36895173C>T   | Missense Mutation | ELMO1    | p.V723I  | engulfment and cell mot56 (0.00)    | 42 (0.26) | 0.70 |
| 11-02 | Gp4 Focus 2 | g.chr11:107524948G>A | Splice Site       | ELMOD1   | p.G227E  | ELMO/CED-12 domain44 (0.00)         | 81 (0.67) | 1.78 |
| 11-02 | Gp4 Focus 2 | g.chr7:73474307C>G   | Silent            | ELN      | p.G502G  | elastin 23 (0.00)                   | 31 (0.19) | 0.84 |
| 11-02 | Gp4 Focus 2 | g.chr1:43829629C>A   | Missense Mutation | ELOVL1   | p.Q266H  | ELOVL fatty acid elong22 (0.00)     | 19 (0.63) | 1.68 |
| 11-02 | Gp4 Focus 2 | g.chr1:43829630T>A   | Missense Mutation | ELOVL1   | p.Q266L  | ELOVL fatty acid elong23 (0.00)     | 19 (0.63) | 1.68 |
| 11-02 | Gp4 Focus 2 | g.chr1:19563646C>T   | Silent            | EMC1     | p.L433L  | ER membrane protein c132 (0.00)     | 51 (0.41) | 1.10 |
| 11-02 | Gp4 Focus 2 | g.chr16:1825083G>A   | Silent            | EME2     | p.E173E  | essential meiotic structu 63 (0.00) | 14 (0.36) | 1.14 |
| 11-02 | Gp4 Focus 2 | g.chr11:62375688C>T  | Silent            | EML3     | p.K397K  | echinoderm microtubule 79 (0.01)    | 20 (0.35) | 0.93 |
| 11-02 | Gp4 Focus 2 | g.chr2:55143955C>A   | Silent            | EML6     | p.I1186I | echinoderm microtubule 35 (0.00)    | 28 (0.18) | 0.48 |
| 11-02 | Gp4 Focus 2 | g.chr5:73931828G>A   | Silent            | ENC1     | p.C88C   | ectodermal-neural corte:56 (0.00)   | 59 (0.32) | 0.86 |
| 11-02 | Gp4 Focus 2 | g.chr13:43872615C>T  | Nonsense Mutation | ENOX1    | p.W438*  | ecto-NOX disulfide-thic 52 (0.00)   | 31 (0.45) | 1.20 |
| 11-02 | Gp4 Focus 2 | g.chr3:69056908C>G   | Missense Mutation | EOGT     | p.E126Q  | EGF domain-specific O- 79 (0.00)    | 42 (0.19) | 0.51 |
| 11-02 | Gp4 Focus 2 | g.chr6:131190919G>C  | Silent            | EPB41L2  | p.A727A  | erythrocyte membrane p60 (0.00)     | 21 (0.24) | 0.63 |
| 11-02 | Gp4 Focus 2 | g.chr6:131206331C>T  | Missense Mutation | EPB41L2  | p.G580R  | erythrocyte membrane p96 (0.00)     | 47 (0.15) | 0.40 |
| 11-02 | Gp4 Focus 2 | g.chr5:111598199G>A  | Missense Mutation | EPB41L4A | p.P212S  | erythrocyte membrane p81 (0.00)     | 42 (0.21) | 0.57 |
| 11-02 | Gp4 Focus 2 | g.chr15:43498731G>C  | Missense Mutation | EPB42    | p.A472G  | erythrocyte membrane p17 (0.00)     | 28 (0.32) | 0.86 |



|       |             |                      |                   |        |          |                          |            |           |      |
|-------|-------------|----------------------|-------------------|--------|----------|--------------------------|------------|-----------|------|
| 11-02 | Gp4 Focus 2 | g.chr18:43438659G>A  | Silent            | EPG5   | p.C2366C | ectopic P-granules auto  | 37 (0.00)  | 13 (0.38) | 1.03 |
| 11-02 | Gp4 Focus 2 | g.chr18:43447616C>T  | Missense Mutation | EPG5   | p.S2108N | ectopic P-granules auto  | 116 (0.00) | 21 (0.29) | 0.76 |
| 11-02 | Gp4 Focus 2 | g.chr3:89498519C>T   | Nonsense Mutation | EPHA3  | p.Q831*  | EPH receptor A3          | 31 (0.00)  | 52 (0.33) | 0.87 |
| 11-02 | Gp4 Focus 2 | g.chr3:89521653C>T   | Silent            | EPHA3  | p.I910I  | EPH receptor A3          | 34 (0.00)  | 14 (0.50) | 1.33 |
| 11-02 | Gp4 Focus 2 | g.chr3:134920352G>A  | Missense Mutation | EPHB1  | p.G723S  | EPH receptor B1          | 62 (0.00)  | 60 (0.25) | 0.67 |
| 11-02 | Gp4 Focus 2 | g.chr7:100417850G>T  | Missense Mutation | EPHB4  | p.H293N  | EPH receptor B4          | 35 (0.00)  | 24 (0.46) | 1.22 |
| 11-02 | Gp4 Focus 2 | g.chr8:27361242G>A   | Missense Mutation | EPHX2  | p.R37H   | epoxide hydrolase 2, cyt | 19 (0.00)  | 9 (0.56)  | 1.48 |
| 11-02 | Gp4 Focus 2 | g.chr12:56478809G>A  | Missense Mutation | ERBB3  | p.V89M   | v-erb-b2 avian erythrobl | 41 (0.00)  | 34 (0.21) | 0.55 |
| 11-02 | Gp4 Focus 2 | g.chr12:56478895C>T  | Silent            | ERBB3  | p.I117I  | v-erb-b2 avian erythrobl | 49 (0.00)  | 49 (0.31) | 0.82 |
| 11-02 | Gp4 Focus 2 | g.chr3:56468779G>A   | Missense Mutation | ERC2   | p.T86I   | ELKS/RAB6-interactin     | 15 (0.00)  | 39 (0.15) | 0.41 |
| 11-02 | Gp4 Focus 2 | g.chr2:128018918C>A  | Missense Mutation | ERCC3  | p.M650I  | excision repair cross-co | 19 (0.00)  | 18 (0.33) | 1.08 |
| 11-02 | Gp4 Focus 2 | g.chr21:39768537G>A  | Intron            | ERG    |          | v-ets avian erythroblast | 56 (0.02)  | 27 (0.93) | 2.47 |
| 11-02 | Gp4 Focus 2 | g.chr21:39778469G>A  | Intron            | ERG    |          | v-ets avian erythroblast | 58 (0.00)  | 55 (0.40) | 1.07 |
| 11-02 | Gp4 Focus 2 | g.chr21:39787607G>A  | Intron            | ERG    |          | v-ets avian erythroblast | 30 (0.00)  | 27 (0.30) | 0.79 |
| 11-02 | Gp4 Focus 2 | g.chr21:39788074G>A  | Intron            | ERG    |          | v-ets avian erythroblast | 30 (0.00)  | 29 (0.55) | 1.47 |
| 11-02 | Gp4 Focus 2 | g.chr21:39791003G>A  | Intron            | ERG    |          | v-ets avian erythroblast | 87 (0.01)  | 75 (0.20) | 0.53 |
| 11-02 | Gp4 Focus 2 | g.chr21:39797844G>A  | Intron            | ERG    |          | v-ets avian erythroblast | 61 (0.00)  | 39 (0.23) | 0.62 |
| 11-02 | Gp4 Focus 2 | g.chr21:39813360G>A  | Intron            | ERG    |          | v-ets avian erythroblast | 60 (0.00)  | 26 (0.23) | 0.62 |
| 11-02 | Gp4 Focus 2 | g.chr21:39845235C>T  | Intron            | ERG    |          | v-ets avian erythroblast | 55 (0.00)  | 15 (0.40) | 1.07 |
| 11-02 | Gp4 Focus 2 | g.chr21:39856649G>A  | Intron            | ERG    |          | v-ets avian erythroblast | 114 (0.00) | 28 (0.18) | 0.48 |
| 11-02 | Gp4 Focus 2 | g.chr21:39867360G>A  | Intron            | ERG    |          | v-ets avian erythroblast | 20 (0.00)  | 15 (0.47) | 1.24 |
| 11-02 | Gp4 Focus 2 | g.chr21:39891928T>C  | Intron            | ERG    |          | v-ets avian erythroblast | 29 (0.00)  | 13 (0.38) | 1.03 |
| 11-02 | Gp4 Focus 2 | g.chr21:39891932G>C  | Intron            | ERG    |          | v-ets avian erythroblast | 29 (0.00)  | 13 (0.38) | 1.03 |
| 11-02 | Gp4 Focus 2 | g.chr21:39961039C>G  | Intron            | ERG    |          | v-ets avian erythroblast | 32 (0.00)  | 11 (0.45) | 1.21 |
| 11-02 | Gp4 Focus 2 | g.chr21:39963831G>A  | Intron            | ERG    |          | v-ets avian erythroblast | 61 (0.00)  | 11 (0.45) | 1.21 |
| 11-02 | Gp4 Focus 2 | g.chr21:39983403C>G  | Intron            | ERG    |          | v-ets avian erythroblast | 34 (0.00)  | 28 (0.36) | 0.95 |
| 11-02 | Gp4 Focus 2 | g.chr21:39988555G>A  | Intron            | ERG    |          | v-ets avian erythroblast | 41 (0.00)  | 39 (0.95) | 2.53 |
| 11-02 | Gp4 Focus 2 | g.chr21:39998135G>A  | Intron            | ERG    |          | v-ets avian erythroblast | 76 (0.00)  | 25 (0.56) | 1.49 |
| 11-02 | Gp4 Focus 2 | g.chr21:40010537G>T  | Intron            | ERG    |          | v-ets avian erythroblast | 34 (0.00)  | 14 (0.64) | 1.71 |
| 11-02 | Gp4 Focus 2 | g.chr21:40012277G>A  | Intron            | ERG    |          | v-ets avian erythroblast | 22 (0.00)  | 13 (0.38) | 1.03 |
| 11-02 | Gp4 Focus 2 | g.chr20:34143994G>A  | Silent            | ERGIC3 | p.Q277Q  | ERGIC and golgi 3        | 17 (0.00)  | 18 (0.28) | 0.74 |
| 11-02 | Gp4 Focus 2 | g.chr8:37601924C>T   | Silent            | ERLIN2 | p.V96V   | ER lipid raft associated | 97 (0.01)  | 25 (0.60) | 1.94 |
| 11-02 | Gp4 Focus 2 | g.chr1:43300765G>A   | Missense Mutation | ERMAP  | p.V164I  | erythroblast membrane-   | 15 (0.00)  | 33 (0.18) | 0.48 |
| 11-02 | Gp4 Focus 2 | g.chr9:5798923C>T    | Missense Mutation | ERMP1  | p.G718E  | endoplasmic reticulum    | r40 (0.00) | 12 (0.50) | 1.33 |
| 11-02 | Gp4 Focus 2 | g.chr12:112460322G>T | Missense Mutation | ERP29  | p.A117S  | endoplasmic reticulum    | r25 (0.00) | 33 (0.42) | 1.13 |

|       |             |                      |                   |          |          |                                      |            |      |
|-------|-------------|----------------------|-------------------|----------|----------|--------------------------------------|------------|------|
| 11-02 | Gp4 Focus 2 | g.chr6:11105051G>A   | Nonsense Mutation | ERVFRD-1 | p.Q165*  | endogenous retrovirus g 135 (0.00)   | 42 (0.33)  | 0.89 |
| 11-02 | Gp4 Focus 2 | g.chr12:53680207G>A  | Silent            | ESPL1    | p.L1229L | extra spindle pole bodie:57 (0.00)   | 28 (0.21)  | 0.57 |
| 11-02 | Gp4 Focus 2 | g.chr12:53680352G>A  | Missense Mutation | ESPL1    | p.G1278S | extra spindle pole bodie:49 (0.00)   | 16 (0.50)  | 1.33 |
| 11-02 | Gp4 Focus 2 | g.chr16:68264213G>A  | Silent            | ESRP2    | p.P690P  | epithelial splicing regul& 38 (0.00) | 18 (0.44)  | 1.19 |
| 11-02 | Gp4 Focus 2 | g.chr16:68264849G>A  | Missense Mutation | ESRP2    | p.S598L  | epithelial splicing regul& 17 (0.00) | 29 (0.24)  | 0.64 |
| 11-02 | Gp4 Focus 2 | g.chr14:76966370C>G  | Silent            | ESRRB    | p.G487G  | estrogen-related recepto 19 (0.00)   | 12 (0.42)  | 1.11 |
| 11-02 | Gp4 Focus 2 | g.chr12:56524601G>A  | Silent            | ESYT1    | p.L153L  | extended synaptotagmin22 (0.00)      | 15 (0.33)  | 0.89 |
| 11-02 | Gp4 Focus 2 | g.chr4:109677646G>A  | Missense Mutation | ETNPPL   | p.S73F   | ethanolamine-phosphate40 (0.03)      | 24 (0.21)  | 0.56 |
| 11-02 | Gp4 Focus 2 | g.chr21:40190438C>A  | Missense Mutation | ETS2     | p.P227T  | v-ets avian erythroblastc 67 (0.00)  | 43 (0.21)  | 0.56 |
| 11-02 | Gp4 Focus 2 | g.chr7:13971242C>T   | Silent            | ETV1     | p.Q229Q  | ets variant 1 53 (0.00)              | 54 (0.19)  | 0.66 |
| 11-02 | Gp4 Focus 2 | g.chr7:13971292G>A   | Missense Mutation | ETV1     | p.R213C  | ets variant 1 55 (0.00)              | 52 (0.27)  | 0.96 |
| 11-02 | Gp4 Focus 2 | g.chr4:5735156G>T    | Missense Mutation | EVC      | p.K232N  | Ellis van Creveld syndrc 96 (0.01)   | 22 (0.23)  | 0.61 |
| 11-02 | Gp4 Focus 2 | g.chr22:29694858G>A  | Missense Mutation | EWSR1    | p.R523Q  | EWS RNA-binding prot22 (0.00)        | 16 (0.31)  | 0.83 |
| 11-02 | Gp4 Focus 2 | g.chr15:41507990G>A  | Nonsense Mutation | EXD1     | p.Q144*  | exonuclease 3'-5' domai 53 (0.00)    | 51 (0.59)  | 1.57 |
| 11-02 | Gp4 Focus 2 | g.chr1:242016714C>T  | Silent            | EXO1     | p.V112V  | exonuclease 1 45 (0.00)              | 24 (0.21)  | 0.56 |
| 11-02 | Gp4 Focus 2 | g.chr1:242021915C>T  | Silent            | EXO1     | p.Y217Y  | exonuclease 1 35 (0.00)              | 48 (0.54)  | 1.44 |
| 11-02 | Gp4 Focus 2 | g.chr1:40980716C>T   | Missense Mutation | EXO5     | p.P167L  | exonuclease 5 52 (0.00)              | 32 (0.22)  | 0.58 |
| 11-02 | Gp4 Focus 2 | g.chr4:56759920G>A   | Missense Mutation | EXOC1    | p.V643I  | exocyst complex compo 20 (0.00)      | 11 (0.45)  | 1.21 |
| 11-02 | Gp4 Focus 2 | g.chr6:564648G>A     | Missense Mutation | EXOC2    | p.L522F  | exocyst complex compo 44 (0.00)      | 21 (0.33)  | 0.64 |
| 11-02 | Gp4 Focus 2 | g.chr5:462278C>T     | Silent            | EXOC3    | p.S503S  | exocyst complex compo 22 (0.00)      | 50 (0.16)  | 0.43 |
| 11-02 | Gp4 Focus 2 | g.chr1:231471489G>T  | Missense Mutation | EXOC8    | p.P664Q  | exocyst complex compo 128 (0.00)     | 11 (0.55)  | 1.45 |
| 11-02 | Gp4 Focus 2 | g.chr9:133570899G>A  | Missense Mutation | EXOSC2   | p.G48E   | exosome component 2 47 (0.00)        | 35 (0.37)  | 0.99 |
| 11-02 | Gp4 Focus 2 | g.chr1:26357727G>A   | Silent            | EXTL1    | p.Q402Q  | exostosin-like glycosylti 25 (0.00)  | 11 (0.55)  | 1.45 |
| 11-02 | Gp4 Focus 2 | g.chr8:28573675C>T   | Silent            | EXTL3    | p.S33S   | exostosin-like glycosylti 15 (0.00)  | 28 (0.21)  | 0.57 |
| 11-02 | Gp4 Focus 2 | g.chr8:28595046G>A   | Missense Mutation | EXTL3    | p.E763K  | exostosin-like glycosylti 41 (0.00)  | 72 (0.21)  | 0.56 |
| 11-02 | Gp4 Focus 2 | g.chr8:72184079G>A   | Nonsense Mutation | EYA1     | p.R294*  | EYA transcriptional coa 72 (0.00)    | 23 (0.35)  | 1.17 |
| 11-02 | Gp4 Focus 2 | g.chr20:45633599C>T  | Silent            | EYA2     | p.L58L   | EYA transcriptional coa 34 (0.00)    | 45 (0.18)  | 0.47 |
| 11-02 | Gp4 Focus 2 | g.chr17:40876387G>A  | Missense Mutation | EZH1     | p.S31L   | enhancer of zeste 1 poly 63 (0.02)   | 14 (0.36)  | 0.95 |
| 11-02 | Gp4 Focus 2 | g.chr13:113803291C>T | Missense Mutation | F10      | p.S306L  | coagulation factor X 16 (0.00)       | 91 (0.26)  | 0.70 |
| 11-02 | Gp4 Focus 2 | g.chr11:46744790G>A  | Missense Mutation | F2       | p.G126D  | coagulation factor II (thi 21 (0.00) | 52 (0.44)  | 1.18 |
| 11-02 | Gp4 Focus 2 | g.chr1:169510423G>A  | Missense Mutation | F5       | p.T1302I | coagulation factor V (pr 46 (0.00)   | 125 (0.28) | 0.75 |
| 11-02 | Gp4 Focus 2 | g.chr2:96679541C>T   | RNA               | FAHD2CP  |          | fumarylacetoacetate hyd 22 (0.00)    | 20 (0.25)  | 0.67 |
| 11-02 | Gp4 Focus 2 | g.chr1:207078369C>G  | Missense Mutation | FAIM3    | p.A390P  | Fas apoptotic inhibitory 24 (0.00)   | 33 (0.27)  | 0.73 |
| 11-02 | Gp4 Focus 2 | g.chr5:14601228G>A   | Silent            | FAM105A  | p.L73L   | family with sequence sii 21 (0.00)   | 51 (0.18)  | 0.47 |
| 11-02 | Gp4 Focus 2 | g.chr22:45728582C>T  | Nonsense Mutation | FAM118A  | p.Q310*  | family with sequence sii 25 (0.00)   | 49 (0.24)  | 0.65 |

|       |             |                     |                   |          |          |                                    |           |      |
|-------|-------------|---------------------|-------------------|----------|----------|------------------------------------|-----------|------|
| 11-02 | Gp4 Focus 2 | g.chr6:170626982C>T | Silent            | FAM120B  | p.L168L  | family with sequence siu56 (0.00)  | 35 (0.14) | 0.38 |
| 11-02 | Gp4 Focus 2 | g.chrX:133930217C>T | Missense Mutation | FAM122B  | p.E7K    | family with sequence siu34 (0.00)  | 23 (0.65) | 1.39 |
| 11-02 | Gp4 Focus 2 | g.chr2:225266318C>T | Silent            | FAM124B  | p.K56K   | family with sequence siu15 (0.00)  | 15 (0.40) | 1.07 |
| 11-02 | Gp4 Focus 2 | g.chr1:184764146G>A | Nonsense Mutation | FAM129A  | p.Q918*  | family with sequence siu38 (0.00)  | 42 (0.17) | 0.44 |
| 11-02 | Gp4 Focus 2 | g.chr9:130279135C>T | Splice Site       | FAM129B  |          | family with sequence siu43 (0.00)  | 25 (0.52) | 1.39 |
| 11-02 | Gp4 Focus 2 | g.chr2:220044475C>T | Missense Mutation | FAM134A  | p.H137Y  | family with sequence siu73 (0.00)  | 17 (0.29) | 0.78 |
| 11-02 | Gp4 Focus 2 | g.chr10:61083814G>T | Missense Mutation | FAM13C   | p.T126K  | family with sequence siu54 (0.00)  | 80 (0.17) | 0.55 |
| 11-02 | Gp4 Focus 2 | g.chr1:55077407G>A  | Missense Mutation | FAM151A  | p.T271M  | family with sequence siu37 (0.00)  | 18 (0.39) | 1.04 |
| 11-02 | Gp4 Focus 2 | g.chr14:74413009G>A | Silent            | FAM161B  | p.V181V  | family with sequence siu23 (0.00)  | 21 (0.33) | 0.89 |
| 11-02 | Gp4 Focus 2 | g.chr10:15255796G>A | Silent            | FAM171A1 | p.V597V  | family with sequence siu35 (0.00)  | 39 (0.13) | 0.43 |
| 11-02 | Gp4 Focus 2 | g.chr14:45433517G>A | Silent            | FAM179B  | p.R631R  | family with sequence siu46 (0.00)  | 16 (0.62) | 1.67 |
| 11-02 | Gp4 Focus 2 | g.chr7:135433276G>A | Missense Mutation | FAM180A  | p.S18F   | family with sequence siu58 (0.00)  | 55 (0.76) | 2.04 |
| 11-02 | Gp4 Focus 2 | g.chr7:102427914C>T | Missense Mutation | FAM185A  | p.T355I  | family with sequence siu227 (0.00) | 44 (0.18) | 0.48 |
| 11-02 | Gp4 Focus 2 | g.chr4:2695461C>T   | Silent            | FAM193A  | p.H715H  | family with sequence siu16 (0.00)  | 28 (0.21) | 0.57 |
| 11-02 | Gp4 Focus 2 | g.chr5:176952110C>A | Nonsense Mutation | FAM193B  | p.E458*  | family with sequence siu25 (0.00)  | 34 (0.21) | 0.55 |
| 11-02 | Gp4 Focus 2 | g.chr5:176952111C>A | Missense Mutation | FAM193B  | p.L457F  | family with sequence siu25 (0.00)  | 33 (0.21) | 0.57 |
| 11-02 | Gp4 Focus 2 | g.chr5:176952130G>A | Missense Mutation | FAM193B  | p.P451L  | family with sequence siu26 (0.00)  | 33 (0.27) | 0.73 |
| 11-02 | Gp4 Focus 2 | g.chr9:34835152C>T  | RNA               | FAM205B  |          | family with sequence siu31 (0.00)  | 24 (0.33) | 0.89 |
| 11-02 | Gp4 Focus 2 | g.chr3:49841922G>A  | Silent            | FAM212A  | p.Q122Q  | family with sequence siu15 (0.00)  | 10 (0.50) | 1.33 |
| 11-02 | Gp4 Focus 2 | g.chr10:46272856G>T | Missense Mutation | FAM21C   | p.V760L  | family with sequence siu21 (0.00)  | 38 (0.42) | 1.12 |
| 11-02 | Gp4 Focus 2 | g.chr1:809349G>A    | lincRNA           | FAM41C   |          | family with sequence siu55 (0.00)  | 38 (0.16) | 0.42 |
| 11-02 | Gp4 Focus 2 | g.chr15:59146727G>A | Missense Mutation | FAM63B   | p.G595E  | family with sequence siu42 (0.00)  | 20 (0.25) | 0.67 |
| 11-02 | Gp4 Focus 2 | g.chr16:67576474C>T | Silent            | FAM65A   | p.V609V  | family with sequence siu98 (0.00)  | 76 (0.20) | 0.53 |
| 11-02 | Gp4 Focus 2 | g.chr16:67576512C>T | Missense Mutation | FAM65A   | p.P622L  | family with sequence siu58 (0.00)  | 57 (0.35) | 0.94 |
| 11-02 | Gp4 Focus 2 | g.chr7:128366904G>A | Missense Mutation | FAM71F1  | p.E177K  | family with sequence siu98 (0.00)  | 37 (0.57) | 1.51 |
| 11-02 | Gp4 Focus 2 | g.chr8:94713567G>A  | Missense Mutation | FAM92A1  | p.A48T   | family with sequence siu111 (0.00) | 34 (0.32) | 0.86 |
| 11-02 | Gp4 Focus 2 | g.chr2:33817240G>A  | Silent            | FAM98A   | p.L82L   | family with sequence siu110 (0.00) | 38 (0.18) | 0.49 |
| 11-02 | Gp4 Focus 2 | g.chr15:31229403G>A | Missense Mutation | FAN1     | p.E1000K | FANCD2/FANCI-assoc 46 (0.00)       | 31 (0.26) | 0.69 |
| 11-02 | Gp4 Focus 2 | g.chr3:10081514T>C  | Missense Mutation | FANCD2   | p.V227A  | Fanconi anemia, comple 48 (0.00)   | 43 (0.16) | 0.43 |
| 11-02 | Gp4 Focus 2 | g.chr3:10115047G>A  | Splice Site       | FANCD2   |          | Fanconi anemia, comple 39 (0.00)   | 11 (0.55) | 1.45 |
| 11-02 | Gp4 Focus 2 | g.chr14:45605440G>T | Missense Mutation | FANCM    | p.C69F   | Fanconi anemia, comple 28 (0.00)   | 18 (0.50) | 1.33 |
| 11-02 | Gp4 Focus 2 | g.chr1:172634935C>G | Missense Mutation | FASLG    | p.H209D  | Fas ligand (TNF superfa 55 (0.00)  | 67 (0.63) | 1.67 |
| 11-02 | Gp4 Focus 2 | g.chr2:207655383G>A | Silent            | FASTKD2  | p.L662L  | FAST kinase domains 2 229 (0.00)   | 43 (0.23) | 0.62 |
| 11-02 | Gp4 Focus 2 | g.chr4:187510201G>A | Missense Mutation | FAT1     | p.P4438S | FAT atypical cadherin 1 139 (0.00) | 25 (0.44) | 1.17 |
| 11-02 | Gp4 Focus 2 | g.chr4:187554856G>A | Silent            | FAT1     | p.T1435T | FAT atypical cadherin 1 28 (0.00)  | 31 (0.58) | 1.55 |

|       |             |                      |                   |        |          |                                     |            |      |
|-------|-------------|----------------------|-------------------|--------|----------|-------------------------------------|------------|------|
| 11-02 | Gp4 Focus 2 | g.chr4:187627891G>A  | Missense Mutation | FAT1   | p.P1031S | FAT atypical cadherin 131 (0.00)    | 34 (0.24)  | 0.63 |
| 11-02 | Gp4 Focus 2 | g.chr4:187628126G>A  | Silent            | FAT1   | p.H952H  | FAT atypical cadherin 154 (0.00)    | 37 (0.46)  | 1.23 |
| 11-02 | Gp4 Focus 2 | g.chr4:187628138C>G  | Missense Mutation | FAT1   | p.W948C  | FAT atypical cadherin 155 (0.00)    | 41 (0.32)  | 0.85 |
| 11-02 | Gp4 Focus 2 | g.chr5:150889588C>T  | Missense Mutation | FAT2   | p.G4018E | FAT atypical cadherin 250 (0.00)    | 32 (0.22)  | 0.58 |
| 11-02 | Gp4 Focus 2 | g.chr11:92088454G>A  | Missense Mutation | FAT3   | p.G909E  | FAT atypical cadherin 376 (0.00)    | 34 (0.32)  | 0.86 |
| 11-02 | Gp4 Focus 2 | g.chr11:92088538G>A  | Missense Mutation | FAT3   | p.G937D  | FAT atypical cadherin 335 (0.00)    | 24 (0.21)  | 0.56 |
| 11-02 | Gp4 Focus 2 | g.chr11:92533867C>A  | Missense Mutation | FAT3   | p.P2413H | FAT atypical cadherin 344 (0.00)    | 26 (0.19)  | 0.51 |
| 11-02 | Gp4 Focus 2 | g.chr11:925338390C>T | Silent            | FAT3   | p.L2840L | FAT atypical cadherin 336 (0.00)    | 29 (0.17)  | 0.46 |
| 11-02 | Gp4 Focus 2 | g.chr4:126336855G>A  | Missense Mutation | FAT4   | p.S2246N | FAT atypical cadherin 429 (0.00)    | 16 (0.31)  | 0.83 |
| 11-02 | Gp4 Focus 2 | g.chr17:73929151G>A  | Missense Mutation | FBF1   | p.P17L   | Fas (TNFRSF6) binding24 (0.00)      | 22 (0.23)  | 0.61 |
| 11-02 | Gp4 Focus 2 | g.chr15:48704915C>T  | Missense Mutation | FBN1   | p.G2693S | fibrillin 1 60 (0.00)               | 17 (0.47)  | 1.25 |
| 11-02 | Gp4 Focus 2 | g.chr15:48808445G>A  | Missense Mutation | FBN1   | p.P421L  | fibrillin 1 31 (0.00)               | 23 (0.35)  | 0.93 |
| 11-02 | Gp4 Focus 2 | g.chr5:127855028C>T  | Missense Mutation | FBN2   | p.R189H  | fibrillin 2 39 (0.00)               | 16 (0.50)  | 1.33 |
| 11-02 | Gp4 Focus 2 | g.chr5:107559896G>A  | Missense Mutation | FBXL17 | p.H116Y  | F-box and leucine-rich r 18 (0.00)  | 12 (0.50)  | 1.33 |
| 11-02 | Gp4 Focus 2 | g.chr5:15928498G>A   | Silent            | FBXL7  | p.Q209Q  | F-box and leucine-rich r 41 (0.00)  | 24 (0.38)  | 1.00 |
| 11-02 | Gp4 Focus 2 | g.chr9:37537799G>A   | Silent            | FBXO10 | p.L243L  | F-box protein 10 36 (0.00)          | 26 (0.19)  | 0.51 |
| 11-02 | Gp4 Focus 2 | g.chr7:100187605G>A  | Silent            | FBXO24 | p.K15K   | F-box protein 24 18 (0.00)          | 43 (0.26)  | 0.68 |
| 11-02 | Gp4 Focus 2 | g.chr19:39521707C>G  | Silent            | FBXO27 | p.L178L  | F-box protein 27 38 (0.00)          | 133 (0.23) | 0.62 |
| 11-02 | Gp4 Focus 2 | g.chr6:146126242G>A  | Silent            | FBXO30 | p.L434L  | F-box protein 30 77 (0.00)          | 24 (0.42)  | 1.11 |
| 11-02 | Gp4 Focus 2 | g.chr14:55818462G>A  | Missense Mutation | FBXO34 | p.E452K  | F-box protein 34 71 (0.00)          | 26 (0.38)  | 1.03 |
| 11-02 | Gp4 Focus 2 | g.chr5:41929969C>T   | Missense Mutation | FBXO4  | p.S199F  | F-box protein 4 108 (0.00)          | 25 (0.48)  | 1.28 |
| 11-02 | Gp4 Focus 2 | g.chr3:121341453T>C  | Missense Mutation | FBXO40 | p.S393P  | F-box protein 40 32 (0.00)          | 22 (0.45)  | 1.21 |
| 11-02 | Gp4 Focus 2 | g.chr8:101153462G>A  | Silent            | FBXO43 | p.S340S  | F-box protein 43 17 (0.00)          | 19 (0.32)  | 0.84 |
| 11-02 | Gp4 Focus 2 | g.chr1:207133025G>T  | Splice Site       | FCAMR  | p.T524T  | Fc receptor, IgA, IgM, h34 (0.00)   | 42 (0.17)  | 0.44 |
| 11-02 | Gp4 Focus 2 | g.chr1:161483712C>T  | Missense Mutation | FCGR2A | p.A257V  | Fc fragment of IgG, low 30 (0.00)   | 37 (0.22)  | 0.58 |
| 11-02 | Gp4 Focus 2 | g.chr1:161518350C>T  | Nonsense Mutation | FCGR3A | p.W60*   | Fc fragment of IgG, low 58 (0.00)   | 34 (0.26)  | 0.71 |
| 11-02 | Gp4 Focus 2 | g.chr1:157504465G>A  | Silent            | FCRL5  | p.Y540Y  | Fc receptor-like 5 36 (0.00)        | 13 (0.54)  | 1.44 |
| 11-02 | Gp4 Focus 2 | g.chr11:61563223G>T  | Silent            | FEN1   | p.L130L  | flap structure-specific et40 (0.00) | 41 (0.17)  | 0.46 |
| 11-02 | Gp4 Focus 2 | g.chr2:97366073C>G   | RNA               | FER1L5 |          | fer-1-like family membe51 (0.00)    | 13 (0.46)  | 1.23 |
| 11-02 | Gp4 Focus 2 | g.chr8:125058023C>T  | Missense Mutation | FER1L6 | p.L869F  | fer-1-like family membe83 (0.00)    | 18 (0.39)  | 1.33 |
| 11-02 | Gp4 Focus 2 | g.chr11:125351502G>A | Silent            | FEZ1   | p.Y113Y  | fasciculation and elonga 76 (0.00)  | 31 (0.26)  | 0.69 |
| 11-02 | Gp4 Focus 2 | g.chr4:155507531C>T  | Silent            | FGA    | p.G350G  | fibrinogen alpha chain 27 (0.00)    | 35 (0.40)  | 1.07 |
| 11-02 | Gp4 Focus 2 | g.chr4:155490821G>A  | Missense Mutation | FGB    | p.V153M  | fibrinogen beta chain 47 (0.00)     | 20 (0.50)  | 1.33 |
| 11-02 | Gp4 Focus 2 | g.chr3:14862411C>T   | Silent            | FGD5   | p.S611S  | FYVE, RhoGEF and PF34 (0.00)        | 13 (0.69)  | 1.85 |
| 11-02 | Gp4 Focus 2 | g.chr3:14964560G>A   | Missense Mutation | FGD5   | p.C1272Y | FYVE, RhoGEF and PF58 (0.00)        | 34 (0.24)  | 0.63 |

|       |             |                     |                   |         |          |                                                      |           |      |
|-------|-------------|---------------------|-------------------|---------|----------|------------------------------------------------------|-----------|------|
| 11-02 | Gp4 Focus 2 | g.chr3:14974637G>T  | Splice Site       | FGD5    |          | FYVE, RhoGEF and PE29 (0.00)                         | 45 (0.18) | 0.47 |
| 11-02 | Gp4 Focus 2 | g.chr4:153884213T>C | Silent            | FHDC1   | p.S320S  | FH2 domain containing 36 (0.00)                      | 32 (0.31) | 0.83 |
| 11-02 | Gp4 Focus 2 | g.chr3:60522631G>A  | Missense Mutation | FHIT    | p.S22F   | fragile histidine triad 26 (0.00)                    | 20 (0.55) | 1.47 |
| 11-02 | Gp4 Focus 2 | g.chr16:67272811A>T | Missense Mutation | FHOD1   | p.I123N  | formin homology 2 domain 32 (0.00)                   | 32 (0.22) | 0.58 |
| 11-02 | Gp4 Focus 2 | g.chr6:76024753G>A  | Silent            | FILIP1  | p.S265S  | filamin A interacting protein 55 (0.00)              | 24 (0.21) | 0.56 |
| 11-02 | Gp4 Focus 2 | g.chr3:99568062G>A  | Missense Mutation | FILIP1L | p.R820C  | filamin A interacting protein 68 (0.00)              | 25 (0.28) | 0.54 |
| 11-02 | Gp4 Focus 2 | g.chr17:39969470G>A | Missense Mutation | FKBP10  | p.G62R   | FK506 binding protein 177 (0.00)                     | 13 (0.62) | 1.64 |
| 11-02 | Gp4 Focus 2 | g.chr6:63921737C>T  | Silent            | FKBP1C  | p.I92I   | FK506 binding protein 122 (0.00)                     | 53 (0.30) | 0.81 |
| 11-02 | Gp4 Focus 2 | g.chr6:35554828C>T  | Missense Mutation | FKBP5   | p.G275R  | FK506 binding protein 153 (0.00)                     | 43 (0.16) | 0.43 |
| 11-02 | Gp4 Focus 2 | g.chr7:55752938C>A  | RNA               | FKBP9L  |          | 39 (0.00)                                            | 23 (0.39) | 1.04 |
| 11-02 | Gp4 Focus 2 | g.chr3:58108836C>T  | Missense Mutation | FLNB    | p.P1048L | filamin B, beta 41 (0.00)                            | 30 (0.23) | 0.62 |
| 11-02 | Gp4 Focus 2 | g.chr3:58120467G>A  | Missense Mutation | FLNB    | p.A1578T | filamin B, beta 20 (0.00)                            | 26 (0.42) | 1.13 |
| 11-02 | Gp4 Focus 2 | g.chr14:86089691C>T | Silent            | FLRT2   | p.S611S  | fibronectin leucine rich type 24 (0.00)              | 28 (0.29) | 0.76 |
| 11-02 | Gp4 Focus 2 | g.chr14:76045760G>A | Missense Mutation | FLVCR2  | p.G149S  | feline leukemia virus surface glycoprotein 35 (0.00) | 16 (0.56) | 1.50 |
| 11-02 | Gp4 Focus 2 | g.chr15:33192233C>T | Missense Mutation | FMN1    | p.A1201T | formin 1 75 (0.00)                                   | 32 (0.16) | 0.42 |
| 11-02 | Gp4 Focus 2 | g.chr2:153417469C>T | Silent            | FMNL2   | p.I172I  | formin-like 2 23 (0.00)                              | 26 (0.35) | 1.13 |
| 11-02 | Gp4 Focus 2 | g.chr2:216235118G>A | Missense Mutation | FN1     | p.T2251I | fibronectin 1 33 (0.00)                              | 12 (0.42) | 1.11 |
| 11-02 | Gp4 Focus 2 | g.chr2:216241351G>A | Silent            | FN1     | p.T1919T | fibronectin 1 15 (0.00)                              | 25 (0.24) | 0.64 |
| 11-02 | Gp4 Focus 2 | g.chr17:80684388C>T | Silent            | FN3KRP  | p.F167F  | fructosamine 3 kinase related 18 (0.00)              | 20 (0.75) | 2.00 |
| 11-02 | Gp4 Focus 2 | g.chr1:94016559G>A  | Silent            | FNBP1L  | p.E569E  | formin binding protein 171 (0.00)                    | 33 (0.21) | 0.57 |
| 11-02 | Gp4 Focus 2 | g.chr1:109275931G>T | Silent            | FNDC7   | p.L639L  | fibronectin type III domain 47 (0.00)                | 39 (0.44) | 0.91 |
| 11-02 | Gp4 Focus 2 | g.chr5:131008561C>T | Missense Mutation | FNIP1   | p.G481S  | folliculin interacting protein 41 (0.00)             | 28 (0.18) | 0.48 |
| 11-02 | Gp4 Focus 2 | g.chr9:20976511G>A  | Missense Mutation | FOCAD   | p.A1409T | focadhesin 57 (0.00)                                 | 16 (0.31) | 1.02 |
| 11-02 | Gp4 Focus 2 | g.chr17:80545130C>T | Missense Mutation | FOXK2   | p.H590Y  | forkhead box K2 17 (0.00)                            | 17 (0.35) | 0.94 |
| 11-02 | Gp4 Focus 2 | g.chrX:70321577C>A  | Missense Mutation | FOXO4   | p.F499L  | forkhead box O4 16 (0.00)                            | 11 (0.45) | 0.76 |
| 11-02 | Gp4 Focus 2 | g.chr4:79188586G>A  | Splice Site       | FRAS1   | p.R327R  | Fraser extracellular matrix protein 37 (0.00)        | 31 (0.39) | 1.03 |
| 11-02 | Gp4 Focus 2 | g.chr4:79254464C>A  | Missense Mutation | FRAS1   | p.P726T  | Fraser extracellular matrix protein 23 (0.00)        | 17 (0.35) | 0.94 |
| 11-02 | Gp4 Focus 2 | g.chr4:79300969G>A  | Missense Mutation | FRAS1   | p.V1128I | Fraser extracellular matrix protein 131 (0.01)       | 67 (0.36) | 0.96 |
| 11-02 | Gp4 Focus 2 | g.chr4:144618406G>A | Silent            | FREM3   | p.L1141L | FRAS1 related extracellular matrix protein 70 (0.00) | 33 (0.33) | 0.89 |
| 11-02 | Gp4 Focus 2 | g.chr10:49430371G>A | Silent            | FRMPD2  | p.G480G  | FERM and PDZ domain containing 63 (0.02)             | 51 (0.22) | 0.58 |
| 11-02 | Gp4 Focus 2 | g.chr10:49431234C>T | Silent            | FRMPD2  | p.K416K  | FERM and PDZ domain containing 31 (0.00)             | 20 (0.40) | 1.07 |
| 11-02 | Gp4 Focus 2 | g.chr10:49440183G>A | Silent            | FRMPD2  | p.T381T  | FERM and PDZ domain containing 32 (0.00)             | 16 (0.69) | 1.83 |
| 11-02 | Gp4 Focus 2 | g.chr6:41744673G>A  | Missense Mutation | FRS3    | p.P18L   | fibroblast growth factor 29 (0.00)                   | 36 (0.17) | 0.44 |
| 11-02 | Gp4 Focus 2 | g.chr13:32653073C>T | Missense Mutation | FRY     | p.P58L   | furry homolog (Drosophila) 89 (0.00)                 | 23 (0.48) | 1.28 |
| 11-02 | Gp4 Focus 2 | g.chr13:32752547G>A | Silent            | FRY     | p.Q885Q  | furry homolog (Drosophila) 53 (0.00)                 | 36 (0.17) | 0.44 |

|       |             |                     |                   |         |          |                            |            |           |      |
|-------|-------------|---------------------|-------------------|---------|----------|----------------------------|------------|-----------|------|
| 11-02 | Gp4 Focus 2 | g.chr13:32841337C>T | Silent            | FRY     | p.P2659P | furry homolog (Drosophila) | 16 (0.00)  | 31 (0.19) | 0.52 |
| 11-02 | Gp4 Focus 2 | g.chr2:186604094G>A | Missense Mutation | FSIP2   | p.A41T   | fibrous sheath interactin  | 35 (0.00)  | 39 (0.15) | 0.41 |
| 11-02 | Gp4 Focus 2 | g.chr2:186656437C>T | Missense Mutation | FSIP2   | p.S1525L | fibrous sheath interactin  | 75 (0.00)  | 21 (0.24) | 0.63 |
| 11-02 | Gp4 Focus 2 | g.chr2:186678711C>T | Missense Mutation | FSIP2   | p.T6756I | fibrous sheath interactin  | 88 (0.01)  | 31 (0.23) | 0.60 |
| 11-02 | Gp4 Focus 2 | g.chr5:52781782C>T  | Splice Site       | FST     | p.S318S  | follistatin                | 118 (0.00) | 54 (0.19) | 0.61 |
| 11-02 | Gp4 Focus 2 | g.chr3:120122155C>A | Missense Mutation | FSTL1   | p.D210Y  | follistatin-like 1         | 28 (0.00)  | 22 (0.64) | 1.70 |
| 11-02 | Gp4 Focus 2 | g.chr17:61902261G>A | Missense Mutation | FTSJ3   | p.T247I  | FtsJ homolog 3 (E. coli)   | 22 (0.00)  | 15 (0.40) | 1.07 |
| 11-02 | Gp4 Focus 2 | g.chr1:78414953G>A  | Missense Mutation | FUBP1   | p.P605S  | far upstream element (F)   | 18 (0.00)  | 17 (0.71) | 2.30 |
| 11-02 | Gp4 Focus 2 | g.chr6:143825309G>A | Missense Mutation | FUCA2   | p.L165F  | fucosidase, alpha-L- 2, f  | 64 (0.02)  | 16 (0.31) | 0.83 |
| 11-02 | Gp4 Focus 2 | g.chr19:49254032G>A | Silent            | FUT1    | p.C169C  | fucosyltransferase 1 (gal) | 30 (0.00)  | 58 (0.17) | 0.46 |
| 11-02 | Gp4 Focus 2 | g.chr5:39153612G>A  | Silent            | FYB     | p.H410H  | FYN binding protein        | 167 (0.00) | 57 (0.16) | 0.42 |
| 11-02 | Gp4 Focus 2 | g.chr3:46008706C>G  | Missense Mutation | FYCO1   | p.G707A  | FYVE and coiled-coil d     | 28 (0.00)  | 67 (0.28) | 0.76 |
| 11-02 | Gp4 Focus 2 | g.chr4:76570740C>T  | Silent            | G3BP2   | p.V441V  | GTPase activating prote    | 53 (0.00)  | 29 (0.31) | 0.83 |
| 11-02 | Gp4 Focus 2 | g.chr17:41056058G>A | Splice Site       | G6PC    |          | glucose-6-phosphatase,     | 18 (0.00)  | 18 (0.56) | 1.48 |
| 11-02 | Gp4 Focus 2 | g.chr4:144390183G>A | Splice Site       | GAB1    |          | GRB2-associated bindin     | 79 (0.00)  | 16 (0.38) | 1.00 |
| 11-02 | Gp4 Focus 2 | g.chr5:161116287G>A | Missense Mutation | GABRA6  | p.M158I  | gamma-aminobutyric ac      | 33 (0.00)  | 39 (0.26) | 0.68 |
| 11-02 | Gp4 Focus 2 | g.chrX:151123842G>T | Missense Mutation | GABRE   | p.H379N  | gamma-aminobutyric ac      | 31 (0.00)  | 14 (0.43) | 0.71 |
| 11-02 | Gp4 Focus 2 | g.chrX:151124015G>A | Missense Mutation | GABRE   | p.T321I  | gamma-aminobutyric ac      | 29 (0.00)  | 39 (0.64) | 1.07 |
| 11-02 | Gp4 Focus 2 | g.chr15:27772753C>T | Missense Mutation | GABRG3  | p.T347I  | gamma-aminobutyric ac      | 37 (0.00)  | 19 (0.37) | 1.36 |
| 11-02 | Gp4 Focus 2 | g.chr6:89888630C>G  | Missense Mutation | GABRR1  | p.R433S  | gamma-aminobutyric ac      | 29 (0.00)  | 17 (0.29) | 0.78 |
| 11-02 | Gp4 Focus 2 | g.chr6:89890148G>A  | Missense Mutation | GABRR1  | p.R337C  | gamma-aminobutyric ac      | 23 (0.00)  | 17 (0.29) | 0.78 |
| 11-02 | Gp4 Focus 2 | g.chr2:171702097C>G | Missense Mutation | GAD1    | p.A278G  | glutamate decarboxylas     | 33 (0.00)  | 40 (0.75) | 2.00 |
| 11-02 | Gp4 Focus 2 | g.chr7:99757718C>T  | Missense Mutation | GAL3ST4 | p.A432T  | galactose-3-O-sulfotran    | 32 (0.00)  | 22 (0.27) | 0.73 |
| 11-02 | Gp4 Focus 2 | g.chr15:49584655C>T | Silent            | GALK2   | p.N296N  | galactokinase 2            | 50 (0.00)  | 49 (0.14) | 0.38 |
| 11-02 | Gp4 Focus 2 | g.chr15:49584656C>T | Missense Mutation | GALK2   | p.P297S  | galactokinase 2            | 50 (0.00)  | 49 (0.27) | 0.71 |
| 11-02 | Gp4 Focus 2 | g.chr5:153760135C>T | Silent            | GALNT10 | p.Y294Y  | polypeptide N-acetylga     | 27 (0.00)  | 13 (0.54) | 1.44 |
| 11-02 | Gp4 Focus 2 | g.chr14:69814598G>A | Nonsense Mutation | GALNT16 | p.W473*  | polypeptide N-acetylga     | 31 (0.00)  | 16 (0.50) | 1.33 |
| 11-02 | Gp4 Focus 2 | g.chr12:4835955C>T  | Silent            | GALNT8  | p.L157L  | polypeptide N-acetylga     | 41 (0.00)  | 21 (0.29) | 0.76 |
| 11-02 | Gp4 Focus 2 | g.chr11:62393557G>C | Missense Mutation | GANAB   | p.A924G  | glucosidase, alpha; neut   | 58 (0.00)  | 20 (0.25) | 0.67 |
| 11-02 | Gp4 Focus 2 | g.chr15:42631866G>A | Splice Site       | GANC    |          | glucosidase, alpha; neut   | 27 (0.00)  | 36 (0.42) | 1.11 |
| 11-02 | Gp4 Focus 2 | g.chr9:128065034G>A | Missense Mutation | GAPVD1  | p.V320I  | GTPase activating prote    | 61 (0.00)  | 35 (0.17) | 0.46 |
| 11-02 | Gp4 Focus 2 | g.chr9:128094221G>A | Silent            | GAPVD1  | p.K709K  | GTPase activating prote    | 22 (0.00)  | 24 (0.21) | 0.56 |
| 11-02 | Gp4 Focus 2 | g.chr9:130104587C>T | Nonsense Mutation | GARNL3  | p.Q409*  | GTPase activating Rap/     | 145 (0.00) | 15 (0.60) | 1.60 |
| 11-02 | Gp4 Focus 2 | g.chr15:45668807C>T | Missense Mutation | GATM    | p.E94K   | glycine amidinotransfer    | 61 (0.00)  | 15 (0.47) | 1.24 |
| 11-02 | Gp4 Focus 2 | g.chr7:56062612G>A  | Missense Mutation | GBAS    | p.D176N  | glioblastoma amplified     | 97 (0.00)  | 40 (0.57) | 1.53 |

|       |             |                      |                   |         |          |                             |            |           |      |
|-------|-------------|----------------------|-------------------|---------|----------|-----------------------------|------------|-----------|------|
| 11-02 | Gp4 Focus 2 | g.chr3:81539601C>T   | Missense Mutation | GBE1    | p.S689N  | glucan (1,4-alpha-), brai   | 137 (0.00) | 80 (0.15) | 0.79 |
| 11-02 | Gp4 Focus 2 | g.chr10:104136161C>T | Missense Mutation | GBF1    | p.A1339V | golgi brefeldin A resista   | 23 (0.00)  | 22 (0.55) | 1.45 |
| 11-02 | Gp4 Focus 2 | g.chr10:104140440C>T | Nonsense Mutation | GBF1    | p.Q1723* | golgi brefeldin A resista   | 30 (0.00)  | 41 (0.34) | 0.91 |
| 11-02 | Gp4 Focus 2 | g.chr10:104140967G>A | Missense Mutation | GBF1    | p.G1752S | golgi brefeldin A resista   | 23 (0.00)  | 16 (0.38) | 1.00 |
| 11-02 | Gp4 Focus 2 | g.chr22:38212648G>C  | Missense Mutation | GCAT    | p.V421L  | glycine C-acetyltransfer    | 15 (0.00)  | 42 (0.33) | 0.89 |
| 11-02 | Gp4 Focus 2 | g.chr19:13008604G>A  | Silent            | GCDH    | p.G390G  | glutaryl-CoA dehydroge      | 24 (0.00)  | 26 (0.31) | 0.82 |
| 11-02 | Gp4 Focus 2 | g.chr7:44190573C>T   | Silent            | GCK     | p.R155R  | glucokinase (hexokinas      | 17 (0.00)  | 39 (0.18) | 0.48 |
| 11-02 | Gp4 Focus 2 | g.chr12:120576601C>A | Silent            | GCN1L1  | p.L2018L | GCN1 general control o      | 72 (0.00)  | 76 (0.25) | 0.67 |
| 11-02 | Gp4 Focus 2 | g.chr9:74828852G>A   | Missense Mutation | GDA     | p.D175N  | guanine deaminase           | 30 (0.00)  | 22 (0.27) | 0.88 |
| 11-02 | Gp4 Focus 2 | g.chr20:42891868A>T  | Splice Site       | GDAP1L1 |          | ganglioside induced diff    | 74 (0.00)  | 42 (0.21) | 0.57 |
| 11-02 | Gp4 Focus 2 | g.chr20:42891962C>T  | Missense Mutation | GDAP1L1 | p.L214F  | ganglioside induced diff    | 58 (0.02)  | 46 (0.22) | 0.58 |
| 11-02 | Gp4 Focus 2 | g.chr1:118455191G>A  | Missense Mutation | GDAP2   | p.S144F  | ganglioside induced diff    | 21 (0.00)  | 14 (0.36) | 0.75 |
| 11-02 | Gp4 Focus 2 | g.chr20:34022598G>C  | Missense Mutation | GDF5OS  | p.Q214H  | growth differentiation fa   | 39 (0.00)  | 41 (0.27) | 0.72 |
| 11-02 | Gp4 Focus 2 | g.chr5:132197740C>T  | Silent            | GDF9    | p.V302V  | growth differentiation fa   | 45 (0.00)  | 38 (0.18) | 0.49 |
| 11-02 | Gp4 Focus 2 | g.chr17:650815G>A    | Silent            | GEMIN4  | p.D156D  | gem (nuclear organelle)     | 89 (0.00)  | 16 (0.31) | 0.83 |
| 11-02 | Gp4 Focus 2 | g.chr17:650828G>A    | Missense Mutation | GEMIN4  | p.T152I  | gem (nuclear organelle)     | 88 (0.00)  | 21 (0.24) | 0.63 |
| 11-02 | Gp4 Focus 2 | g.chr5:154278017G>A  | Silent            | GEMIN5  | p.L1110L | gem (nuclear organelle)     | 61 (0.00)  | 24 (0.21) | 0.56 |
| 11-02 | Gp4 Focus 2 | g.chr19:45593436A>T  | Missense Mutation | GEMIN7  | p.S22C   | gem (nuclear organelle)     | 47 (0.00)  | 20 (0.30) | 0.80 |
| 11-02 | Gp4 Focus 2 | g.chr17:42990674C>T  | Missense Mutation | GFAP    | p.S248N  | glial fibrillary acidic prc | 20 (0.00)  | 33 (0.30) | 0.81 |
| 11-02 | Gp4 Focus 2 | g.chr17:42990690C>T  | Missense Mutation | GFAP    | p.E243K  | glial fibrillary acidic prc | 20 (0.00)  | 31 (0.19) | 0.52 |
| 11-02 | Gp4 Focus 2 | g.chr3:158376742G>A  | Missense Mutation | GFM1    | p.R372H  | G elongation factor, mit    | 34 (0.03)  | 23 (0.26) | 0.70 |
| 11-02 | Gp4 Focus 2 | g.chr16:23481457G>A  | Missense Mutation | GGA2    | p.R494W  | golgi-associated, gamm      | 26 (0.00)  | 25 (0.84) | 2.24 |
| 11-02 | Gp4 Focus 2 | g.chr17:34935774G>A  | Silent            | GGNBP2  | p.Q315Q  | gametogenetin binding i     | 103 (0.00) | 33 (0.18) | 0.48 |
| 11-02 | Gp4 Focus 2 | g.chr17:40342271C>T  | Missense Mutation | GHDC    | p.A436T  | GH3 domain containing       | 27 (0.00)  | 24 (0.29) | 0.78 |
| 11-02 | Gp4 Focus 2 | g.chr10:85903802G>A  | Missense Mutation | GHITM   | p.G94E   | growth hormone inducit      | 88 (0.00)  | 23 (0.39) | 1.04 |
| 11-02 | Gp4 Focus 2 | g.chr10:85904696G>T  | Missense Mutation | GHITM   | p.G136V  | growth hormone inducit      | 32 (0.00)  | 14 (0.36) | 0.95 |
| 11-02 | Gp4 Focus 2 | g.chr17:17965242G>A  | Silent            | GID4    | p.K264K  | GID complex subunit 4       | 20 (0.00)  | 20 (0.30) | 0.80 |
| 11-02 | Gp4 Focus 2 | g.chr2:233613793G>A  | Splice Site       | GIGYF2  |          | GRB10 interacting GYF       | 28 (0.00)  | 20 (0.30) | 0.80 |
| 11-02 | Gp4 Focus 2 | g.chr2:233655476G>T  | Missense Mutation | GIGYF2  | p.D255Y  | GRB10 interacting GYF       | 98 (0.00)  | 35 (0.20) | 0.53 |
| 11-02 | Gp4 Focus 2 | g.chr2:233655869G>A  | Missense Mutation | GIGYF2  | p.R355K  | GRB10 interacting GYF       | 57 (0.00)  | 17 (0.47) | 1.25 |
| 11-02 | Gp4 Focus 2 | g.chr12:110418806C>T | Silent            | GIT2    | p.Q223Q  | G protein-coupled recep     | 131 (0.00) | 29 (0.24) | 0.64 |
| 11-02 | Gp4 Focus 2 | g.chr6:90604208G>A   | Silent            | GJA10   | p.L7L    | gap junction protein, alp   | 141 (0.01) | 65 (0.20) | 0.53 |
| 11-02 | Gp4 Focus 2 | g.chr2:69173568T>A   | Nonsense Mutation | GKN2    | p.K114*  | gastrokine 2                | 32 (0.00)  | 11 (0.45) | 1.21 |
| 11-02 | Gp4 Focus 2 | g.chr9:6604765G>A    | Missense Mutation | GLDC    | p.T294I  | glycine dehydrogenase       | (26 (0.00) | 22 (0.23) | 0.61 |
| 11-02 | Gp4 Focus 2 | g.chr15:51693845G>A  | Silent            | GLDN    | p.T361T  | gliomedin                   | 19 (0.00)  | 22 (0.36) | 0.97 |

|       |             |                      |                   |          |          |                                     |            |      |
|-------|-------------|----------------------|-------------------|----------|----------|-------------------------------------|------------|------|
| 11-02 | Gp4 Focus 2 | g.chr2:121742058C>T  | Silent            | GLI2     | p.I565I  | GLI family zinc finger 266 (0.00)   | 36 (0.75)  | 2.39 |
| 11-02 | Gp4 Focus 2 | g.chr9:36147818C>T   | Missense Mutation | GLIPR2   | p.H17Y   | GLI pathogenesis-relate 71 (0.00)   | 151 (0.16) | 0.42 |
| 11-02 | Gp4 Focus 2 | g.chr17:9739756G>A   | Missense Mutation | GLP2R    | p.V116I  | glucagon-like peptide 2 40 (0.00)   | 38 (0.21)  | 0.56 |
| 11-02 | Gp4 Focus 2 | g.chr17:9792832G>A   | Missense Mutation | GLP2R    | p.R491Q  | glucagon-like peptide 2 19 (0.00)   | 39 (0.36)  | 0.96 |
| 11-02 | Gp4 Focus 2 | g.chr12:129467576G>A | Missense Mutation | GLT1D1   | p.V328M  | glycosyltransferase 1 do22 (0.00)   | 85 (0.61)  | 1.63 |
| 11-02 | Gp4 Focus 2 | g.chr3:52729314C>G   | Missense Mutation | GLT8D1   | p.G273R  | glycosyltransferase 8 do 104 (0.00) | 49 (0.31)  | 0.82 |
| 11-02 | Gp4 Focus 2 | g.chr16:4873831G>A   | Silent            | GLYR1    | p.T205T  | glyoxylate reductase 1 h93 (0.00)   | 68 (0.18)  | 0.56 |
| 11-02 | Gp4 Focus 2 | g.chr19:19745436C>T  | Missense Mutation | GMIP     | p.G655E  | GEM interacting proteir 57 (0.00)   | 44 (0.18)  | 0.48 |
| 11-02 | Gp4 Focus 2 | g.chr20:57484257G>A  | Missense Mutation | GNAS     | p.V177M  | GNAS complex locus 34 (0.00)        | 35 (0.17)  | 0.46 |
| 11-02 | Gp4 Focus 2 | g.chr15:52439692C>T  | Missense Mutation | GNB5     | p.C153Y  | guanine nucleotide bind 31 (0.00)   | 26 (0.31)  | 0.82 |
| 11-02 | Gp4 Focus 2 | g.chr12:102158229G>A | Silent            | GNPTAB   | p.T822T  | N-acetylglucosamine-1- 68 (0.00)    | 23 (0.52)  | 1.39 |
| 11-02 | Gp4 Focus 2 | g.chr3:37367019G>A   | Silent            | GOLGA4   | p.A1236A | golgin A4 40 (0.00)                 | 16 (0.31)  | 0.83 |
| 11-02 | Gp4 Focus 2 | g.chr14:93282739G>A  | Silent            | GOLGA5   | p.Q488Q  | golgin A5 49 (0.00)                 | 60 (0.20)  | 0.53 |
| 11-02 | Gp4 Focus 2 | g.chr15:34673692G>A  | Missense Mutation | GOLGA8A  | p.H578Y  | golgin A8 family, memt 72 (0.00)    | 42 (0.19)  | 0.51 |
| 11-02 | Gp4 Focus 2 | g.chr15:34673725G>A  | Missense Mutation | GOLGA8A  | p.P567S  | golgin A8 family, memt 28 (0.00)    | 55 (0.15)  | 0.39 |
| 11-02 | Gp4 Focus 2 | g.chr15:23261918C>T  | Missense Mutation | GOLGA8I  | p.R344W  | golgin A8 family, memt 29 (0.00)    | 18 (0.39)  | 1.04 |
| 11-02 | Gp4 Focus 2 | g.chr15:23610245C>T  | Silent            | GOLGA8S  | p.F614F  | golgin A8 family, memt 41 (0.00)    | 57 (0.32)  | 0.84 |
| 11-02 | Gp4 Focus 2 | g.chr1:170521382G>A  | Missense Mutation | GORAB    | p.E322K  | golgin, RAB6-interactin 53 (0.00)   | 18 (0.33)  | 0.89 |
| 11-02 | Gp4 Focus 2 | g.chr10:101163301G>A | Missense Mutation | GOT1     | p.T295I  | glutamic-oxaloacetic tra 20 (0.00)  | 10 (0.70)  | 1.87 |
| 11-02 | Gp4 Focus 2 | g.chr16:58756106G>A  | Missense Mutation | GOT2     | p.A108V  | glutamic-oxaloacetic tra 22 (0.00)  | 28 (0.21)  | 0.57 |
| 11-02 | Gp4 Focus 2 | g.chr13:45578491C>T  | Missense Mutation | GPALPP1  | p.S47L   | GPALPP motifs contain 73 (0.00)     | 47 (0.36)  | 0.96 |
| 11-02 | Gp4 Focus 2 | g.chr19:33608898C>T  | Silent            | GPATCH1  | p.F788F  | G patch domain contain 18 (0.00)    | 29 (0.34)  | 0.92 |
| 11-02 | Gp4 Focus 2 | g.chr14:76639960G>A  | Missense Mutation | GPATCH2L | p.V326I  | G patch domain contain 42 (0.00)    | 28 (0.21)  | 0.57 |
| 11-02 | Gp4 Focus 2 | g.chr14:76642986G>A  | Silent            | GPATCH2L | p.L335L  | G patch domain contain 60 (0.00)    | 11 (0.64)  | 1.70 |
| 11-02 | Gp4 Focus 2 | g.chr17:42478700G>A  | Silent            | GPATCH8  | p.L249L  | G patch domain contain 75 (0.00)    | 44 (0.18)  | 0.48 |
| 11-02 | Gp4 Focus 2 | g.chr6:24454242C>T   | Splice Site       | GPLD1    |          | glycosylphosphatidylinc 62 (0.00)   | 30 (0.20)  | 0.53 |
| 11-02 | Gp4 Focus 2 | g.chr1:27215543G>A   | Missense Mutation | GPN2     | p.S162F  | GPN-loop GTPase 2 64 (0.02)         | 34 (0.21)  | 0.55 |
| 11-02 | Gp4 Focus 2 | g.chr6:46977834C>T   | Missense Mutation | GPR110   | p.S446N  | G protein-coupled recep 37 (0.00)   | 27 (0.19)  | 0.49 |
| 11-02 | Gp4 Focus 2 | g.chrX:135405517G>A  | Silent            | GPR112   | p.K217K  | G protein-coupled recep 48 (0.00)   | 41 (0.32)  | 0.53 |
| 11-02 | Gp4 Focus 2 | g.chr4:22390071G>A   | Nonsense Mutation | GPR125   | p.Q1075* | G protein-coupled recep 26 (0.00)   | 18 (0.28)  | 0.74 |
| 11-02 | Gp4 Focus 2 | g.chr3:100373877C>T  | Silent            | GPR128   | p.C231C  | G protein-coupled recep 59 (0.00)   | 23 (0.39)  | 0.76 |
| 11-02 | Gp4 Focus 2 | g.chr7:37780395G>A   | Missense Mutation | GPR141   | p.A134T  | G protein-coupled recep 29 (0.00)   | 10 (0.50)  | 1.33 |
| 11-02 | Gp4 Focus 2 | g.chr7:37780643A>T   | Silent            | GPR141   | p.L216L  | G protein-coupled recep 57 (0.00)   | 33 (0.15)  | 0.40 |
| 11-02 | Gp4 Focus 2 | g.chr2:175324639G>A  | Missense Mutation | GPR155   | p.P580S  | G protein-coupled recep 17 (0.00)   | 44 (0.20)  | 0.55 |
| 11-02 | Gp4 Focus 2 | g.chr15:40099372C>A  | Missense Mutation | GPR176   | p.G87V   | G protein-coupled recep 45 (0.00)   | 20 (0.50)  | 1.33 |



|       |             |                     |                   |            |          |                           |            |           |      |
|-------|-------------|---------------------|-------------------|------------|----------|---------------------------|------------|-----------|------|
| 11-02 | Gp4 Focus 2 | g.chr13:99907407C>T | Silent            | GPR18      | p.Q240Q  | G protein-coupled recep   | 20 (0.00)  | 35 (0.40) | 1.07 |
| 11-02 | Gp4 Focus 2 | g.chr9:125797575G>T | Missense Mutation | GPR21      | p.A244S  | G protein-coupled recep   | 27 (0.00)  | 15 (0.33) | 0.89 |
| 11-02 | Gp4 Focus 2 | g.chr7:107115373G>A | Missense Mutation | GPR22      | p.V290I  | G protein-coupled recep   | 37 (0.00)  | 26 (0.58) | 1.54 |
| 11-02 | Gp4 Focus 2 | g.chr1:27720855G>C  | Missense Mutation | GPR3       | p.G185R  | G protein-coupled recep   | 25 (0.00)  | 22 (0.32) | 0.85 |
| 11-02 | Gp4 Focus 2 | g.chrX:150348333G>A | Missense Mutation | GPR50      | p.G93D   | G protein-coupled recep   | 32 (0.00)  | 17 (0.71) | 1.18 |
| 11-02 | Gp4 Focus 2 | g.chr11:94113895G>A | Missense Mutation | GPR83      | p.P189L  | G protein-coupled recep   | 21 (0.00)  | 19 (0.53) | 1.40 |
| 11-02 | Gp4 Focus 2 | g.chr5:89943369G>A  | Missense Mutation | GPR98      | p.R1026K | G protein-coupled recep   | 86 (0.00)  | 66 (0.35) | 1.40 |
| 11-02 | Gp4 Focus 2 | g.chr5:89975390G>A  | Missense Mutation | GPR98      | p.G1823E | G protein-coupled recep   | 59 (0.00)  | 51 (0.20) | 0.79 |
| 11-02 | Gp4 Focus 2 | g.chr5:89975444G>A  | Missense Mutation | GPR98      | p.R1841H | G protein-coupled recep   | 55 (0.02)  | 54 (0.35) | 1.41 |
| 11-02 | Gp4 Focus 2 | g.chr5:89990418C>T  | Silent            | GPR98      | p.G2615G | G protein-coupled recep   | 66 (0.00)  | 73 (0.21) | 0.82 |
| 11-02 | Gp4 Focus 2 | g.chr5:90052357A>T  | Silent            | GPR98      | p.P3889P | G protein-coupled recep   | 81 (0.01)  | 28 (0.32) | 1.29 |
| 11-02 | Gp4 Focus 2 | g.chr5:90073826G>A  | Missense Mutation | GPR98      | p.R4211Q | G protein-coupled recep   | 117 (0.00) | 45 (0.53) | 2.14 |
| 11-02 | Gp4 Focus 2 | g.chr5:90086768G>A  | Missense Mutation | GPR98      | p.G4708R | G protein-coupled recep   | 119 (0.00) | 45 (0.24) | 0.98 |
| 11-02 | Gp4 Focus 2 | g.chrX:101912606G>A | Silent            | GPRASP1    | p.L1255L | G protein-coupled recep   | 32 (0.00)  | 18 (0.44) | 0.99 |
| 11-02 | Gp4 Focus 2 | g.chr12:13065440C>T | Silent            | GPRC5A     | p.Y347Y  | G protein-coupled recep   | 49 (0.00)  | 16 (0.56) | 1.50 |
| 11-02 | Gp4 Focus 2 | g.chr12:13102994C>T | Missense Mutation | GPRC5D     | p.A109T  | G protein-coupled recep   | 24 (0.00)  | 26 (0.31) | 0.82 |
| 11-02 | Gp4 Focus 2 | g.chr9:37426582C>T  | Missense Mutation | GRHPR      | p.A112V  | glyoxylate reductase/hy   | 16 (0.00)  | 26 (0.62) | 1.64 |
| 11-02 | Gp4 Focus 2 | g.chr10:87487708G>A | Silent            | GRID1      | p.G479G  | glutamate receptor, iono  | 64 (0.00)  | 40 (0.23) | 0.60 |
| 11-02 | Gp4 Focus 2 | g.chr10:87615822C>T | Nonsense Mutation | GRID1      | p.W359*  | glutamate receptor, iono  | 34 (0.00)  | 16 (0.44) | 1.17 |
| 11-02 | Gp4 Focus 2 | g.chr16:9857891G>A  | Silent            | GRIN2A     | p.N1170N | glutamate receptor, iono  | 16 (0.00)  | 32 (0.47) | 1.50 |
| 11-02 | Gp4 Focus 2 | g.chr9:104385633G>A | Missense Mutation | GRIN3A     | p.L861F  | glutamate receptor, iono  | 41 (0.00)  | 15 (0.73) | 1.96 |
| 11-02 | Gp4 Focus 2 | g.chr9:104449352G>A | Missense Mutation | GRIN3A     | p.T277I  | glutamate receptor, iono  | 93 (0.00)  | 33 (0.21) | 0.57 |
| 11-02 | Gp4 Focus 2 | g.chr3:7348208G>T   | Missense Mutation | GRM7       | p.R301I  | glutamate receptor, met   | 99 (0.00)  | 43 (0.21) | 0.56 |
| 11-02 | Gp4 Focus 2 | g.chr8:130762713G>A | Silent            | GSDMC      | p.L349L  | gasdermin C               | 43 (0.00)  | 19 (0.37) | 0.98 |
| 11-02 | Gp4 Focus 2 | g.chr16:85697046G>A | Missense Mutation | GSE1       | p.E824K  | Gse1 coiled-coil protein  | 24 (0.00)  | 10 (0.90) | 2.40 |
| 11-02 | Gp4 Focus 2 | g.chr16:85699607G>A | Silent            | GSE1       | p.L928L  | Gse1 coiled-coil protein  | 30 (0.00)  | 15 (0.40) | 1.07 |
| 11-02 | Gp4 Focus 2 | g.chr20:33517270C>T | Missense Mutation | GSS        | p.R412Q  | glutathione synthetase    | 84 (0.00)  | 73 (0.15) | 0.40 |
| 11-02 | Gp4 Focus 2 | g.chr6:52616394G>T  | Missense Mutation | GSTA2      | p.S176Y  | glutathione S-transferas  | 16 (0.00)  | 41 (0.29) | 0.78 |
| 11-02 | Gp4 Focus 2 | g.chr1:110231688G>A | Missense Mutation | GSTM1      | p.G66R   | glutathione S-transferas  | 26 (0.00)  | 27 (0.56) | 1.16 |
| 11-02 | Gp4 Focus 2 | g.chr3:120469535G>A | Missense Mutation | GTF2E1     | p.E46K   | general transcription fac | 75 (0.00)  | 45 (0.78) | 2.07 |
| 11-02 | Gp4 Focus 2 | g.chr3:120469744G>A | Silent            | GTF2E1     | p.E115E  | general transcription fac | 77 (0.00)  | 22 (0.32) | 0.85 |
| 11-02 | Gp4 Focus 2 | g.chr3:120489720C>T | Silent            | GTF2E1     | p.N198N  | general transcription fac | 171 (0.01) | 30 (0.40) | 1.07 |
| 11-02 | Gp4 Focus 2 | g.chr3:120495292G>A | Missense Mutation | GTF2E1     | p.A225T  | general transcription fac | 38 (0.00)  | 34 (0.15) | 0.39 |
| 11-02 | Gp4 Focus 2 | g.chr7:72657816G>A  | RNA               | GTF2IRD2P1 |          | GTF2I repeat domain cc    | 28 (0.00)  | 32 (0.22) | 0.95 |
| 11-02 | Gp4 Focus 2 | g.chr7:72657890G>A  | RNA               | GTF2IRD2P1 |          | GTF2I repeat domain cc    | 34 (0.00)  | 28 (0.32) | 1.39 |

|       |             |                      |                   |         |          |                                     |           |      |
|-------|-------------|----------------------|-------------------|---------|----------|-------------------------------------|-----------|------|
| 11-02 | Gp4 Focus 2 | g.chr16:27476714G>A  | Missense Mutation | GTF3C1  | p.A1741V | general transcription fac 52 (0.00) | 25 (0.20) | 0.53 |
| 11-02 | Gp4 Focus 2 | g.chr2:27556635G>A   | Missense Mutation | GTF3C2  | p.T540I  | general transcription fac 52 (0.02) | 34 (0.15) | 0.39 |
| 11-02 | Gp4 Focus 2 | g.chr2:27560394C>T   | Missense Mutation | GTF3C2  | p.A328T  | general transcription fac 31 (0.00) | 14 (0.36) | 0.95 |
| 11-02 | Gp4 Focus 2 | g.chr2:27560418G>A   | Nonsense Mutation | GTF3C2  | p.Q320*  | general transcription fac 32 (0.00) | 14 (0.36) | 0.95 |
| 11-02 | Gp4 Focus 2 | g.chr9:135553764G>A  | Nonsense Mutation | GTF3C4  | p.W253*  | general transcription fac 51 (0.00) | 33 (0.21) | 0.57 |
| 11-02 | Gp4 Focus 2 | g.chr7:89976068A>G   | Missense Mutation | GTPBP10 | p.S5G    | GTP-binding protein 10 64 (0.00)    | 13 (0.38) | 1.03 |
| 11-02 | Gp4 Focus 2 | g.chr3:108635060G>A  | Splice Site       | GUCA1C  | p.A119V  | guanylate cyclase activa 24 (0.00)  | 22 (0.23) | 0.61 |
| 11-02 | Gp4 Focus 2 | g.chr11:106558385G>A | Silent            | GUCY1A2 | p.L718L  | guanylate cyclase 1, solh 20 (0.00) | 27 (0.22) | 0.59 |
| 11-02 | Gp4 Focus 2 | g.chr11:106810282C>T | Silent            | GUCY1A2 | p.K370K  | guanylate cyclase 1, solh 58 (0.00) | 24 (0.33) | 0.89 |
| 11-02 | Gp4 Focus 2 | g.chr11:106810669G>A | Silent            | GUCY1A2 | p.H241H  | guanylate cyclase 1, solh 61 (0.00) | 13 (0.38) | 1.03 |
| 11-02 | Gp4 Focus 2 | g.chr11:106810680G>A | Missense Mutation | GUCY1A2 | p.H238Y  | guanylate cyclase 1, solh 60 (0.00) | 12 (0.42) | 1.11 |
| 11-02 | Gp4 Focus 2 | g.chr2:189452626G>A  | Missense Mutation | GULP1   | p.G265R  | GULP, engulfment adap 129 (0.00)    | 55 (0.18) | 0.48 |
| 11-02 | Gp4 Focus 2 | g.chr5:21491618G>A   | RNA               | GUSBP1  |          | glucuronidase, beta pset 81 (0.00)  | 74 (0.24) | 1.28 |
| 11-02 | Gp4 Focus 2 | g.chr12:21727087A>T  | Missense Mutation | GYS2    | p.H223Q  | glycogen synthase 2 (liv 40 (0.00)  | 15 (0.33) | 0.89 |
| 11-02 | Gp4 Focus 2 | g.chr20:23345291C>T  | Missense Mutation | GZF1    | p.L91F   | GDNF-inducible zinc fin 27 (0.00)   | 23 (0.35) | 0.93 |
| 11-02 | Gp4 Focus 2 | g.chr10:71849877G>A  | Silent            | H2AFY2  | p.P78P   | H2A histone family, me 73 (0.00)    | 46 (0.30) | 0.81 |
| 11-02 | Gp4 Focus 2 | g.chr12:31944913C>T  | Missense Mutation | H3F3C   | p.R63Q   | H3 histone, family 3C 20 (0.00)     | 23 (0.39) | 1.04 |
| 11-02 | Gp4 Focus 2 | g.chr10:115335714C>T | Silent            | HABP2   | p.T94T   | hyaluronan binding prot 25 (0.00)   | 31 (0.52) | 1.38 |
| 11-02 | Gp4 Focus 2 | g.chr6:105219079G>A  | Nonsense Mutation | HACE1   | p.Q734*  | HECT domain and anky 17 (0.00)      | 11 (0.45) | 1.21 |
| 11-02 | Gp4 Focus 2 | g.chr3:15642674C>G   | Missense Mutation | HACL1   | p.G37R   | 2-hydroxyacyl-CoA lya: 15 (0.00)    | 18 (0.61) | 1.63 |
| 11-02 | Gp4 Focus 2 | g.chr17:39881166C>T  | Silent            | HAP1    | p.E601E  | huntingtin-associated pr 43 (0.00)  | 56 (0.23) | 0.62 |
| 11-02 | Gp4 Focus 2 | g.chr15:89424920G>A  | Missense Mutation | HAPLN3  | p.P116L  | hyaluronan and proteogl 17 (0.00)   | 22 (0.27) | 0.73 |
| 11-02 | Gp4 Focus 2 | g.chr5:140076557C>A  | Missense Mutation | HARS2   | p.Q286K  | histidyl-tRNA synthetas 148 (0.00)  | 71 (0.20) | 0.53 |
| 11-02 | Gp4 Focus 2 | g.chr11:5289744C>T   | Silent            | HBE1    | p.K133K  | hemoglobin, epsilon 1 129 (0.00)    | 26 (0.35) | 0.92 |
| 11-02 | Gp4 Focus 2 | g.chr5:139715483C>T  | Silent            | HBEGF   | p.L176L  | heparin-binding EGF-lil 25 (0.00)   | 51 (0.25) | 0.68 |
| 11-02 | Gp4 Focus 2 | g.chr12:123200237C>T | Missense Mutation | HCAR3   | p.G350S  | hydroxycarboxylic acid 16 (0.00)    | 14 (0.43) | 1.14 |
| 11-02 | Gp4 Focus 2 | g.chr7:18563066G>A   | Intron            | HDAC9   |          | histone deacetylase 9 61 (0.00)     | 44 (0.20) | 0.55 |
| 11-02 | Gp4 Focus 2 | g.chr7:18585987G>A   | Intron            | HDAC9   |          | histone deacetylase 9 61 (0.00)     | 25 (0.28) | 0.75 |
| 11-02 | Gp4 Focus 2 | g.chr7:18617939A>G   | Intron            | HDAC9   |          | histone deacetylase 9 31 (0.00)     | 24 (0.21) | 0.56 |
| 11-02 | Gp4 Focus 2 | g.chr7:18636660G>A   | Intron            | HDAC9   |          | histone deacetylase 9 31 (0.00)     | 31 (0.19) | 0.52 |
| 11-02 | Gp4 Focus 2 | g.chr7:18636706G>T   | Intron            | HDAC9   |          | histone deacetylase 9 27 (0.00)     | 22 (0.32) | 0.85 |
| 11-02 | Gp4 Focus 2 | g.chr7:18638620G>A   | Intron            | HDAC9   |          | histone deacetylase 9 35 (0.00)     | 12 (0.75) | 2.00 |
| 11-02 | Gp4 Focus 2 | g.chr7:18645290C>T   | Intron            | HDAC9   |          | histone deacetylase 9 82 (0.01)     | 51 (0.24) | 0.63 |
| 11-02 | Gp4 Focus 2 | g.chr7:18675833C>A   | Intron            | HDAC9   |          | histone deacetylase 9 85 (0.00)     | 24 (0.29) | 0.78 |
| 11-02 | Gp4 Focus 2 | g.chr7:18681963C>T   | Intron            | HDAC9   |          | histone deacetylase 9 51 (0.00)     | 25 (0.36) | 0.96 |

|       |             |                      |                   |         |          |                         |            |           |      |
|-------|-------------|----------------------|-------------------|---------|----------|-------------------------|------------|-----------|------|
| 11-02 | Gp4 Focus 2 | g.chr7:18694597G>A   | Intron            | HDAC9   |          | histone deacetylase 9   | 98 (0.00)  | 53 (0.21) | 0.55 |
| 11-02 | Gp4 Focus 2 | g.chr7:18706049G>A   | Missense Mutation | HDAC9   | p.A481T  | histone deacetylase 9   | 34 (0.03)  | 28 (0.46) | 1.24 |
| 11-02 | Gp4 Focus 2 | g.chr7:18734077G>A   | Intron            | HDAC9   |          | histone deacetylase 9   | 36 (0.00)  | 20 (0.55) | 1.47 |
| 11-02 | Gp4 Focus 2 | g.chr7:18738303G>A   | Intron            | HDAC9   |          | histone deacetylase 9   | 75 (0.00)  | 34 (0.21) | 0.55 |
| 11-02 | Gp4 Focus 2 | g.chr7:18748867T>C   | Intron            | HDAC9   |          | histone deacetylase 9   | 17 (0.00)  | 17 (0.29) | 0.78 |
| 11-02 | Gp4 Focus 2 | g.chr7:18761585G>A   | Intron            | HDAC9   |          | histone deacetylase 9   | 40 (0.00)  | 56 (0.39) | 1.05 |
| 11-02 | Gp4 Focus 2 | g.chr7:18764559G>A   | Intron            | HDAC9   |          | histone deacetylase 9   | 87 (0.00)  | 90 (0.24) | 0.65 |
| 11-02 | Gp4 Focus 2 | g.chr7:18795580C>T   | Intron            | HDAC9   |          | histone deacetylase 9   | 85 (0.01)  | 21 (0.29) | 0.76 |
| 11-02 | Gp4 Focus 2 | g.chr7:18808118C>T   | Intron            | HDAC9   |          | histone deacetylase 9   | 89 (0.00)  | 69 (0.14) | 0.39 |
| 11-02 | Gp4 Focus 2 | g.chr7:18843954G>A   | Intron            | HDAC9   |          | histone deacetylase 9   | 121 (0.01) | 67 (0.16) | 0.44 |
| 11-02 | Gp4 Focus 2 | g.chr7:18860928G>A   | Intron            | HDAC9   |          | histone deacetylase 9   | 42 (0.00)  | 38 (0.82) | 2.18 |
| 11-02 | Gp4 Focus 2 | g.chr7:18866253G>A   | Intron            | HDAC9   |          | histone deacetylase 9   | 20 (0.00)  | 23 (0.26) | 0.70 |
| 11-02 | Gp4 Focus 2 | g.chr7:18869884G>A   | Intron            | HDAC9   |          | histone deacetylase 9   | 81 (0.01)  | 38 (0.71) | 1.89 |
| 11-02 | Gp4 Focus 2 | g.chr7:18906148C>T   | Intron            | HDAC9   |          | histone deacetylase 9   | 25 (0.00)  | 27 (0.59) | 1.58 |
| 11-02 | Gp4 Focus 2 | g.chr7:18926847C>T   | Intron            | HDAC9   |          | histone deacetylase 9   | 60 (0.00)  | 22 (0.41) | 1.09 |
| 11-02 | Gp4 Focus 2 | g.chr7:18942061G>A   | Intron            | HDAC9   |          | histone deacetylase 9   | 21 (0.00)  | 33 (0.55) | 1.45 |
| 11-02 | Gp4 Focus 2 | g.chr7:18953278G>A   | Intron            | HDAC9   |          | histone deacetylase 9   | 20 (0.00)  | 26 (0.23) | 0.62 |
| 11-02 | Gp4 Focus 2 | g.chr7:18957141G>A   | Intron            | HDAC9   |          | histone deacetylase 9   | 33 (0.00)  | 34 (0.62) | 1.65 |
| 11-02 | Gp4 Focus 2 | g.chr7:18957918C>T   | Intron            | HDAC9   |          | histone deacetylase 9   | 38 (0.00)  | 35 (0.23) | 0.61 |
| 11-02 | Gp4 Focus 2 | g.chr7:18977806A>G   | Intron            | HDAC9   |          | histone deacetylase 9   | 33 (0.00)  | 13 (0.46) | 1.23 |
| 11-02 | Gp4 Focus 2 | g.chr7:18989002C>T   | Intron            | HDAC9   |          | histone deacetylase 9   | 132 (0.00) | 33 (0.61) | 1.62 |
| 11-02 | Gp4 Focus 2 | g.chr7:19024372T>A   | Intron            | HDAC9   |          | histone deacetylase 9   | 164 (0.00) | 24 (0.42) | 1.11 |
| 11-02 | Gp4 Focus 2 | g.chr7:19024373T>A   | Intron            | HDAC9   |          | histone deacetylase 9   | 166 (0.00) | 24 (0.25) | 0.67 |
| 11-02 | Gp4 Focus 2 | g.chr15:50534686C>A  | Missense Mutation | HDC     | p.C587F  | histidine decarboxylase | 79 (0.00)  | 71 (0.23) | 0.60 |
| 11-02 | Gp4 Focus 2 | g.chrX:6995283G>A    | Missense Mutation | HDHD1   | p.S120F  | haloacid dehalogenase-1 | 21 (0.00)  | 18 (0.50) | 1.02 |
| 11-02 | Gp4 Focus 2 | g.chr1:236718617G>A  | Nonsense Mutation | HEATR1  | p.Q1968* | HEAT repeat containing  | 101 (0.00) | 42 (0.21) | 0.57 |
| 11-02 | Gp4 Focus 2 | g.chr1:236746403G>A  | Nonsense Mutation | HEATR1  | p.Q779*  | HEAT repeat containing  | 33 (0.00)  | 29 (0.21) | 0.55 |
| 11-02 | Gp4 Focus 2 | g.chr14:73974907C>T  | Silent            | HEATR4  | p.L604L  | HEAT repeat containing  | 46 (0.00)  | 34 (0.35) | 0.94 |
| 11-02 | Gp4 Focus 2 | g.chr14:31828151C>T  | Silent            | HEATR5A | p.L728L  | HEAT repeat containing  | 69 (0.01)  | 22 (0.36) | 1.16 |
| 11-02 | Gp4 Focus 2 | g.chr14:31856346C>T  | Nonsense Mutation | HEATR5A | p.W390*  | HEAT repeat containing  | 117 (0.00) | 22 (0.36) | 1.16 |
| 11-02 | Gp4 Focus 2 | g.chr2:37234348C>T   | Missense Mutation | HEATR5B | p.S1541N | HEAT repeat containing  | 28 (0.00)  | 57 (0.16) | 0.42 |
| 11-02 | Gp4 Focus 2 | g.chr14:31638572G>A  | Missense Mutation | HECTD1  | p.L479F  | HECT domain containir   | 41 (0.00)  | 53 (0.15) | 0.48 |
| 11-02 | Gp4 Focus 2 | g.chr12:112650299G>A | Nonsense Mutation | HECTD4  | p.Q2395* | HECT domain containir   | 97 (0.00)  | 21 (0.33) | 0.89 |
| 11-02 | Gp4 Focus 2 | g.chr12:112657247C>T | Missense Mutation | HECTD4  | p.M2193I | HECT domain containir   | 19 (0.00)  | 18 (0.39) | 1.04 |
| 11-02 | Gp4 Focus 2 | g.chr7:43436489G>A   | Splice Site       | HECW1   |          | HECT, C2 and WW dor     | 17 (0.00)  | 23 (0.22) | 0.58 |

|       |             |                      |                   |           |          |                           |            |           |      |
|-------|-------------|----------------------|-------------------|-----------|----------|---------------------------|------------|-----------|------|
| 11-02 | Gp4 Focus 2 | g.chr3:124731964G>A  | Missense Mutation | HEG1      | p.T820I  | heart development prote   | 15 (0.00)  | 54 (0.17) | 0.44 |
| 11-02 | Gp4 Focus 2 | g.chr3:124732096G>C  | Missense Mutation | HEG1      | p.A776G  | heart development prote   | 15 (0.00)  | 28 (0.18) | 0.48 |
| 11-02 | Gp4 Focus 2 | g.chr17:65074632G>A  | Silent            | HELZ      | p.F1855F | helicase with zinc finger | 61 (0.00)  | 98 (0.15) | 0.41 |
| 11-02 | Gp4 Focus 2 | g.chr11:124794654C>A | Missense Mutation | HEPACAM   | p.G133W  | hepatic and glial cell ad | 26 (0.00)  | 18 (0.33) | 0.89 |
| 11-02 | Gp4 Focus 2 | g.chr11:93806497G>A  | Missense Mutation | HEPHL1    | p.G466S  | hephaestin-like 1         | 63 (0.00)  | 42 (0.26) | 0.70 |
| 11-02 | Gp4 Focus 2 | g.chr15:63932440C>T  | Missense Mutation | HERC1     | p.E3938K | HECT and RLD domain       | 177 (0.00) | 31 (0.23) | 0.60 |
| 11-02 | Gp4 Focus 2 | g.chr15:63935700C>T  | Missense Mutation | HERC1     | p.G3745E | HECT and RLD domain       | 46 (0.00)  | 14 (0.36) | 0.95 |
| 11-02 | Gp4 Focus 2 | g.chr15:63952043G>T  | Silent            | HERC1     | p.R3106R | HECT and RLD domain       | 34 (0.00)  | 13 (0.54) | 1.44 |
| 11-02 | Gp4 Focus 2 | g.chr15:63958335C>A  | Missense Mutation | HERC1     | p.A2780S | HECT and RLD domain       | 23 (0.00)  | 21 (0.24) | 0.63 |
| 11-02 | Gp4 Focus 2 | g.chr15:63958633G>A  | Missense Mutation | HERC1     | p.P2749S | HECT and RLD domain       | 70 (0.00)  | 49 (0.61) | 1.63 |
| 11-02 | Gp4 Focus 2 | g.chr15:28437200C>T  | Silent            | HERC2     | p.V2786V | HECT and RLD domain       | 75 (0.00)  | 45 (0.33) | 1.23 |
| 11-02 | Gp4 Focus 2 | g.chr15:28437240C>T  | Missense Mutation | HERC2     | p.S2773N | HECT and RLD domain       | 70 (0.01)  | 42 (0.21) | 0.79 |
| 11-02 | Gp4 Focus 2 | g.chr15:28492023C>G  | Missense Mutation | HERC2     | p.G1086R | HECT and RLD domain       | 37 (0.00)  | 36 (0.17) | 0.61 |
| 11-02 | Gp4 Focus 2 | g.chr15:23318677A>T  | RNA               | HERC2P2   |          | hect domain and RLD 2     | 156 (0.00) | 28 (0.29) | 0.76 |
| 11-02 | Gp4 Focus 2 | g.chr16:56976114G>A  | Missense Mutation | HERPUD1   | p.D326N  | homocysteine-inducible    | 77 (0.00)  | 21 (0.33) | 0.89 |
| 11-02 | Gp4 Focus 2 | g.chr7:35733890C>T   | Silent            | HERPUD2   | p.P17P   | HERPUD family memb        | 46 (0.00)  | 14 (0.36) | 0.95 |
| 11-02 | Gp4 Focus 2 | g.chr5:74014147G>A   | Missense Mutation | HEXB      | p.G401R  | hexosaminidase B (beta    | 74 (0.00)  | 31 (0.45) | 1.20 |
| 11-02 | Gp4 Focus 2 | g.chr1:40098340G>A   | Missense Mutation | HEYL      | p.A43V   | hes-related family bHLI   | 60 (0.00)  | 36 (0.19) | 0.52 |
| 11-02 | Gp4 Focus 2 | g.chr3:120365157C>T  | Silent            | HGD       | p.E202E  | homogentisate 1,2-dioxy   | 36 (0.00)  | 46 (0.17) | 0.46 |
| 11-02 | Gp4 Focus 2 | g.chr1:222717457G>A  | Silent            | HHIPL2    | p.L132L  | HHIP-like 2               | 70 (0.00)  | 72 (0.18) | 0.48 |
| 11-02 | Gp4 Focus 2 | g.chr7:75174446C>T   | Missense Mutation | HIP1      | p.R816Q  | huntingtin interacting pr | 76 (0.00)  | 18 (0.50) | 2.16 |
| 11-02 | Gp4 Focus 2 | g.chr12:123338624C>T | Silent            | HIP1R     | p.S204S  | huntingtin interacting pr | 49 (0.00)  | 54 (0.17) | 0.44 |
| 11-02 | Gp4 Focus 2 | g.chr1:114483505G>A  | Missense Mutation | HIPK1     | p.S167N  | homeodomain interactin    | 19 (0.00)  | 35 (0.37) | 0.78 |
| 11-02 | Gp4 Focus 2 | g.chr1:114483965C>T  | Silent            | HIPK1     | p.N320N  | homeodomain interactin    | 55 (0.00)  | 25 (0.24) | 0.50 |
| 11-02 | Gp4 Focus 2 | g.chr11:33374860C>T  | Missense Mutation | HIPK3     | p.P1111S | homeodomain interactin    | 75 (0.00)  | 32 (0.16) | 0.42 |
| 11-02 | Gp4 Focus 2 | g.chr22:19348799C>T  | Silent            | HIRA      | p.K682K  | histone cell cycle regula | 17 (0.00)  | 10 (0.60) | 1.60 |
| 11-02 | Gp4 Focus 2 | g.chr22:19371192C>T  | Missense Mutation | HIRA      | p.D456N  | histone cell cycle regula | 16 (0.00)  | 18 (0.39) | 1.04 |
| 11-02 | Gp4 Focus 2 | g.chr16:30005704C>T  | Silent            | HIRIP3    | p.K254K  | HIRA interacting protei   | 72 (0.00)  | 24 (0.25) | 0.67 |
| 11-02 | Gp4 Focus 2 | g.chr16:30005709C>T  | Missense Mutation | HIRIP3    | p.E253K  | HIRA interacting protei   | 70 (0.00)  | 23 (0.35) | 0.93 |
| 11-02 | Gp4 Focus 2 | g.chr6:25727229C>T   | Silent            | HIST1H2BA | p.R31R   | histone cluster 1, H2ba   | 68 (0.00)  | 40 (0.23) | 0.60 |
| 11-02 | Gp4 Focus 2 | g.chr6:26216813G>A   | Missense Mutation | HIST1H2BG | p.T20I   | histone cluster 1, H2bg   | 78 (0.00)  | 34 (0.29) | 0.78 |
| 11-02 | Gp4 Focus 2 | g.chr6:26273449G>A   | Silent            | HIST1H2BI | p.A82A   | histone cluster 1, H2bi   | 70 (0.00)  | 32 (0.19) | 0.50 |
| 11-02 | Gp4 Focus 2 | g.chr6:143074637G>A  | Silent            | HIVEP2    | p.N2316N | human immunodeficien      | 22 (0.00)  | 21 (0.43) | 1.14 |
| 11-02 | Gp4 Focus 2 | g.chr6:143081323G>A  | Silent            | HIVEP2    | p.S2034S | human immunodeficien      | 29 (0.00)  | 43 (0.30) | 0.81 |
| 11-02 | Gp4 Focus 2 | g.chr6:143081344C>T  | Missense Mutation | HIVEP2    | p.M2027I | human immunodeficien      | 25 (0.00)  | 40 (0.53) | 1.40 |

|       |             |                      |                   |           |          |                          |            |           |      |
|-------|-------------|----------------------|-------------------|-----------|----------|--------------------------|------------|-----------|------|
| 11-02 | Gp4 Focus 2 | g.chr1:42045683G>A   | Missense Mutation | HIVEP3    | p.P1596S | human immunodeficien     | 58 (0.00)  | 34 (0.18) | 0.47 |
| 11-02 | Gp4 Focus 2 | g.chr2:75081445G>A   | Missense Mutation | HK2       | p.R2H    | hexokinase 2             | 83 (0.00)  | 17 (0.71) | 1.88 |
| 11-02 | Gp4 Focus 2 | g.chr1:186024700C>T  | Silent            | HMCN1     | p.H2346H | hemicentin 1             | 42 (0.00)  | 24 (0.38) | 1.00 |
| 11-02 | Gp4 Focus 2 | g.chr1:186045701G>A  | Nonsense Mutation | HMCN1     | p.W2811* | hemicentin 1             | 41 (0.00)  | 12 (0.58) | 1.56 |
| 11-02 | Gp4 Focus 2 | g.chr1:186045709G>A  | Missense Mutation | HMCN1     | p.D2814N | hemicentin 1             | 23 (0.00)  | 12 (0.58) | 1.56 |
| 11-02 | Gp4 Focus 2 | g.chr1:186120356G>A  | Missense Mutation | HMCN1     | p.S4878N | hemicentin 1             | 41 (0.00)  | 21 (0.29) | 0.76 |
| 11-02 | Gp4 Focus 2 | g.chr5:74643123G>A   | Missense Mutation | HMGCR     | p.G182D  | 3-hydroxy-3-methylglut   | 70 (0.00)  | 21 (0.52) | 1.40 |
| 11-02 | Gp4 Focus 2 | g.chr1:120302567C>T  | Missense Mutation | HMGCS2    | p.S202N  | 3-hydroxy-3-methylglut   | 19 (0.00)  | 21 (0.29) | 0.60 |
| 11-02 | Gp4 Focus 2 | g.chr15:45847851G>A  | RNA               | HMGN2P46  |          | high mobility group nuc  | 25 (0.00)  | 36 (0.64) | 1.70 |
| 11-02 | Gp4 Focus 2 | g.chr5:149398148G>A  | Missense Mutation | HMGXB3    | p.R310Q  | HMG box domain conta     | 31 (0.00)  | 32 (0.34) | 0.92 |
| 11-02 | Gp4 Focus 2 | g.chr5:149425088G>A  | Silent            | HMGXB3    | p.T930T  | HMG box domain conta     | 38 (0.00)  | 28 (0.32) | 0.86 |
| 11-02 | Gp4 Focus 2 | g.chr7:26233311C>T   | Missense Mutation | HNRNPA2B1 | p.G242D  | heterogeneous nuclear r  | 34 (0.00)  | 14 (0.43) | 1.14 |
| 11-02 | Gp4 Focus 2 | g.chr5:179047977G>A  | Missense Mutation | HNRNPH1   | p.P105S  | heterogeneous nuclear r  | 94 (0.01)  | 14 (0.43) | 1.14 |
| 11-02 | Gp4 Focus 2 | g.chr10:70101416G>C  | Missense Mutation | HNRNPH3   | p.G284R  | heterogeneous nuclear r  | 72 (0.00)  | 31 (0.45) | 1.20 |
| 11-02 | Gp4 Focus 2 | g.chr19:8527415G>A   | Missense Mutation | HNRNPM    | p.G96S   | heterogeneous nuclear r  | 32 (0.00)  | 69 (0.26) | 0.70 |
| 11-02 | Gp4 Focus 2 | g.chr19:41812358C>T  | Missense Mutation | HNRNPUL1  | p.A820V  | heterogeneous nuclear r  | 65 (0.00)  | 42 (0.19) | 0.51 |
| 11-02 | Gp4 Focus 2 | g.chr10:99359914G>A  | Missense Mutation | HOGA1     | p.A232T  | 4-hydroxy-2-oxoglutar    | 27 (0.00)  | 12 (0.50) | 1.33 |
| 11-02 | Gp4 Focus 2 | g.chr8:42829294G>A   | Silent            | HOOK3     | p.E426E  | hook microtubule-tether  | 85 (0.01)  | 61 (0.26) | 0.85 |
| 11-02 | Gp4 Focus 2 | g.chr7:27222631G>A   | Silent            | HOXA11    | p.R242R  | homeobox A11             | 34 (0.00)  | 28 (0.25) | 0.67 |
| 11-02 | Gp4 Focus 2 | g.chr12:54447841C>T  | Silent            | HOXC4     | p.F45F   | homeobox C4              | 35 (0.00)  | 35 (0.14) | 0.38 |
| 11-02 | Gp4 Focus 2 | g.chr2:176959240G>A  | Missense Mutation | HOXD13    | p.V272I  | homeobox D13             | 81 (0.00)  | 19 (0.42) | 1.12 |
| 11-02 | Gp4 Focus 2 | g.chr2:176996144G>A  | Missense Mutation | HOXD8     | p.R42K   | homeobox D8              | 143 (0.00) | 56 (0.32) | 0.86 |
| 11-02 | Gp4 Focus 2 | g.chr16:72110891G>A  | Missense Mutation | HPR       | p.D320N  | haptoglobin-related prot | 63 (0.00)  | 50 (0.30) | 0.80 |
| 11-02 | Gp4 Focus 2 | g.chrX:133632459G>A  | Silent            | HPRT1     | p.K175K  | hypoxanthine phosphori   | 34 (0.00)  | 26 (0.23) | 0.49 |
| 11-02 | Gp4 Focus 2 | g.chr10:100202959G>A | Silent            | HPS1      | p.V13V   | Hermansky-Pudlak sync    | 17 (0.00)  | 26 (0.19) | 0.51 |
| 11-02 | Gp4 Focus 2 | g.chr3:148877856G>T  | Missense Mutation | HPS3      | p.Q467H  | Hermansky-Pudlak sync    | 71 (0.00)  | 25 (0.20) | 0.53 |
| 11-02 | Gp4 Focus 2 | g.chr22:26868906C>T  | Splice Site       | HPS4      |          | Hermansky-Pudlak sync    | 15 (0.00)  | 17 (0.29) | 0.78 |
| 11-02 | Gp4 Focus 2 | g.chr11:6458767C>T   | Silent            | HPX       | p.Q202Q  | hemopexin                | 26 (0.00)  | 34 (0.24) | 0.63 |
| 11-02 | Gp4 Focus 2 | g.chr1:152193200C>T  | Missense Mutation | HRNR      | p.G302E  | hornerin                 | 22 (0.00)  | 59 (0.31) | 0.81 |
| 11-02 | Gp4 Focus 2 | g.chr16:22926547C>T  | Silent            | HS3ST2    | p.H256H  | heparan sulfate (glucosa | 40 (0.00)  | 22 (0.32) | 0.85 |
| 11-02 | Gp4 Focus 2 | g.chrX:131762925G>A  | Missense Mutation | HS6ST2    | p.P422S  | heparan sulfate 6-O-sulf | 32 (0.00)  | 38 (0.42) | 0.89 |
| 11-02 | Gp4 Focus 2 | g.chr1:120057104G>A  | Missense Mutation | HSD3B1    | p.V320I  | hydroxy-delta-5-steroid  | 50 (0.00)  | 13 (0.38) | 0.80 |
| 11-02 | Gp4 Focus 2 | g.chr6:122733883G>A  | Missense Mutation | HSF2      | p.D102N  | heat shock transcription | 72 (0.00)  | 16 (0.38) | 1.00 |
| 11-02 | Gp4 Focus 2 | g.chr19:16259678T>A  | Missense Mutation | HSH2D     | p.S40T   | hematopoietic SH2 dom    | 39 (0.00)  | 34 (0.24) | 0.63 |
| 11-02 | Gp4 Focus 2 | g.chr14:102568358C>A | Nonsense Mutation | HSP90AA1  | p.G74*   | heat shock protein 90kD  | 58 (0.00)  | 20 (0.45) | 1.20 |

|       |             |                      |                   |             |          |                             |            |           |      |
|-------|-------------|----------------------|-------------------|-------------|----------|-----------------------------|------------|-----------|------|
| 11-02 | Gp4 Focus 2 | g.chr14:102568360G>A | Missense Mutation | HSP90AA1    | p.S73F   | heat shock protein 90kD     | 58 (0.00)  | 21 (0.48) | 1.27 |
| 11-02 | Gp4 Focus 2 | g.chr14:65008773G>C  | Missense Mutation | HSPA2       | p.L402F  | heat shock 70kDa protei     | 18 (0.00)  | 27 (0.30) | 0.79 |
| 11-02 | Gp4 Focus 2 | g.chr2:231988419C>T  | Silent            | HTR2B       | p.Q20Q   | 5-hydroxytryptamine (ser    | 58 (0.00)  | 32 (0.38) | 1.00 |
| 11-02 | Gp4 Focus 2 | g.chr7:154876110C>A  | Silent            | HTR5A       | p.S329S  | 5-hydroxytryptamine (ser    | 39 (0.00)  | 19 (0.32) | 0.84 |
| 11-02 | Gp4 Focus 2 | g.chr10:92508638G>A  | Missense Mutation | HTR7        | p.A418V  | 5-hydroxytryptamine (ser    | 41 (0.00)  | 42 (0.26) | 0.70 |
| 11-02 | Gp4 Focus 2 | g.chr10:92508807G>A  | Missense Mutation | HTR7        | p.P362S  | 5-hydroxytryptamine (ser    | 45 (0.00)  | 56 (0.14) | 0.38 |
| 11-02 | Gp4 Focus 2 | g.chr2:74758810G>A   | Silent            | HTRA2       | p.L342L  | HtrA serine peptidase 2     | 73 (0.00)  | 29 (0.48) | 1.29 |
| 11-02 | Gp4 Focus 2 | g.chr8:38832598C>A   | Missense Mutation | HTRA4       | p.A172E  | HtrA serine peptidase 4     | 61 (0.00)  | 58 (0.38) | 1.23 |
| 11-02 | Gp4 Focus 2 | g.chr3:50332918G>A   | Missense Mutation | HYAL3       | p.S39L   | hyaluronoglucosaminidase    | 41 (0.00)  | 40 (0.30) | 0.80 |
| 11-02 | Gp4 Focus 2 | g.chr16:70989278C>T  | Splice Site       | HYDIN       | p.A2106T | HYDIN, axonemal centri      | 20 (0.00)  | 14 (0.43) | 1.14 |
| 11-02 | Gp4 Focus 2 | g.chr9:94984926G>A   | Silent            | IARS        | p.L1194L | isoleucyl-tRNA synthetase   | 42 (0.00)  | 22 (0.27) | 0.73 |
| 11-02 | Gp4 Focus 2 | g.chr2:209104611G>A  | Nonsense Mutation | IDH1        | p.Q323*  | isocitrate dehydrogenase    | 28 (0.00)  | 31 (0.19) | 0.52 |
| 11-02 | Gp4 Focus 2 | g.chr8:39775707G>T   | Missense Mutation | IDO1        | p.G95V   | indoleamine 2,3-dioxygenase | 43 (0.00)  | 25 (0.24) | 0.78 |
| 11-02 | Gp4 Focus 2 | g.chrX:148582517G>A  | Missense Mutation | IDS         | p.P157L  | iduronate 2-sulfatase       | 20 (0.00)  | 18 (0.56) | 1.34 |
| 11-02 | Gp4 Focus 2 | g.chr10:91143389C>G  | Missense Mutation | IFIT1B      | p.H107D  | interferon-induced protease | 23 (0.00)  | 17 (0.35) | 0.94 |
| 11-02 | Gp4 Focus 2 | g.chr10:91143813C>T  | Missense Mutation | IFIT1B      | p.S248F  | interferon-induced protease | 96 (0.00)  | 44 (0.30) | 0.79 |
| 11-02 | Gp4 Focus 2 | g.chr16:1607942A>G   | Missense Mutation | IFT140      | p.I798T  | intraflagellar transport 1  | 15 (0.00)  | 18 (0.33) | 1.06 |
| 11-02 | Gp4 Focus 2 | g.chr2:27688727C>T   | Missense Mutation | IFT172      | p.R572Q  | intraflagellar transport 1  | 30 (0.00)  | 26 (0.19) | 0.51 |
| 11-02 | Gp4 Focus 2 | g.chr2:27700471C>T   | Nonsense Mutation | IFT172      | p.W392*  | intraflagellar transport 1  | 19 (0.00)  | 19 (0.37) | 0.98 |
| 11-02 | Gp4 Focus 2 | g.chr3:185407200G>A  | Missense Mutation | IGF2BP2     | p.A207V  | insulin-like growth factor  | 21 (0.00)  | 20 (0.35) | 0.93 |
| 11-02 | Gp4 Focus 2 | g.chr6:160511049G>A  | Missense Mutation | IGF2R       | p.G2190E | insulin-like growth factor  | 30 (0.00)  | 32 (0.44) | 1.17 |
| 11-02 | Gp4 Focus 2 | g.chr6:160511068G>A  | Silent            | IGF2R       | p.V2196V | insulin-like growth factor  | 31 (0.00)  | 26 (0.46) | 1.23 |
| 11-02 | Gp4 Focus 2 | g.chr11:68696741G>C  | Missense Mutation | IGHMBP2     | p.S384T  | immunoglobulin mu chain     | 18 (0.00)  | 37 (0.16) | 0.43 |
| 11-02 | Gp4 Focus 2 | g.chr15:22473037G>A  | RNA               | IGHV4OR15-8 |          | immunoglobulin heavy chain  | 19 (0.00)  | 21 (0.38) | 1.02 |
| 11-02 | Gp4 Focus 2 | g.chr2:89339984G>A   | RNA               | IGKV1-12    |          | immunoglobulin kappa chain  | 63 (0.00)  | 68 (0.59) | 1.57 |
| 11-02 | Gp4 Focus 2 | g.chr2:89246990C>T   | RNA               | IGKV1-5     |          | immunoglobulin kappa chain  | 40 (0.00)  | 16 (0.38) | 1.00 |
| 11-02 | Gp4 Focus 2 | g.chr2:89278465G>A   | RNA               | IGKV3-7     |          | immunoglobulin kappa chain  | 69 (0.00)  | 30 (0.67) | 1.78 |
| 11-02 | Gp4 Focus 2 | g.chrX:130409690G>A  | Silent            | IGSF1       | p.P973P  | immunoglobulin superfamily  | 20 (0.00)  | 32 (0.47) | 1.00 |
| 11-02 | Gp4 Focus 2 | g.chr3:151161480G>A  | Missense Mutation | IGSF10      | p.T1752I | immunoglobulin superfamily  | 29 (0.00)  | 12 (0.67) | 1.78 |
| 11-02 | Gp4 Focus 2 | g.chr3:151161577G>A  | Nonsense Mutation | IGSF10      | p.Q1720* | immunoglobulin superfamily  | 24 (0.00)  | 22 (0.73) | 1.94 |
| 11-02 | Gp4 Focus 2 | g.chr3:151163660G>A  | Missense Mutation | IGSF10      | p.T1370I | immunoglobulin superfamily  | 100 (0.00) | 70 (0.14) | 0.38 |
| 11-02 | Gp4 Focus 2 | g.chr3:151163790C>T  | Missense Mutation | IGSF10      | p.A1327T | immunoglobulin superfamily  | 135 (0.00) | 30 (0.23) | 0.62 |
| 11-02 | Gp4 Focus 2 | g.chr1:159900041C>T  | Missense Mutation | IGSF9       | p.E668K  | immunoglobulin superfamily  | 45 (0.00)  | 24 (0.29) | 0.78 |
| 11-02 | Gp4 Focus 2 | g.chr1:159904602G>A  | Silent            | IGSF9       | p.V228V  | immunoglobulin superfamily  | 27 (0.00)  | 23 (0.22) | 0.58 |
| 11-02 | Gp4 Focus 2 | g.chr5:140031333C>A  | Missense Mutation | IK          | p.L40I   | IK cytokine, down-regulated | 20 (0.00)  | 40 (0.35) | 0.93 |

|       |             |                     |                   |        |          |                            |            |            |      |
|-------|-------------|---------------------|-------------------|--------|----------|----------------------------|------------|------------|------|
| 11-02 | Gp4 Focus 2 | g.chr5:140037171C>T | Silent            | IK     | p.V278V  | IK cytokine, down-regu     | 120 (0.00) | 49 (0.20)  | 0.54 |
| 11-02 | Gp4 Focus 2 | g.chr8:42163944G>A  | Silent            | IKBKB  | p.Q187Q  | inhibitor of kappa light   | 121 (0.00) | 23 (0.26)  | 0.84 |
| 11-02 | Gp4 Focus 2 | g.chr8:42163945T>A  | Missense Mutation | IKBKB  | p.Y188N  | inhibitor of kappa light   | 121 (0.00) | 23 (0.26)  | 0.84 |
| 11-02 | Gp4 Focus 2 | g.chr1:206945642C>T | Missense Mutation | IL10   | p.A47T   | interleukin 10             | 34 (0.00)  | 48 (0.15)  | 0.39 |
| 11-02 | Gp4 Focus 2 | g.chr15:81593846C>T | Missense Mutation | IL16   | p.T1104I | interleukin 16             | 32 (0.00)  | 27 (0.37)  | 0.99 |
| 11-02 | Gp4 Focus 2 | g.chr2:102851433C>T | Silent            | IL1RL2 | p.G458G  | interleukin 1 receptor-lil | 36 (0.03)  | 25 (0.32)  | 0.85 |
| 11-02 | Gp4 Focus 2 | g.chr19:14153309C>A | Silent            | IL27RA | p.I193I  | interleukin 27 receptor,   | 26 (0.00)  | 35 (0.14)  | 0.38 |
| 11-02 | Gp4 Focus 2 | g.chr5:55248168C>G  | Missense Mutation | IL6ST  | p.E488Q  | interleukin 6 signal tran: | 21 (0.00)  | 14 (0.64)  | 2.13 |
| 11-02 | Gp4 Focus 2 | g.chr19:10782115G>A | Silent            | ILF3   | p.K105K  | interleukin enhancer bin   | 17 (0.00)  | 19 (0.32)  | 0.84 |
| 11-02 | Gp4 Focus 2 | g.chr2:239090733C>T | Missense Mutation | ILKAP  | p.R270K  | integrin-linked kinase-a:  | 63 (0.00)  | 30 (0.43)  | 1.16 |
| 11-02 | Gp4 Focus 2 | g.chr2:86408431C>A  | Missense Mutation | IMMT   | p.G37V   | inner membrane protein     | 99 (0.00)  | 42 (0.14)  | 0.38 |
| 11-02 | Gp4 Focus 2 | g.chr18:22028108G>A | Silent            | IMPACT | p.G240G  | impact RWD domain pr       | 40 (0.00)  | 52 (0.35)  | 0.92 |
| 11-02 | Gp4 Focus 2 | g.chr1:62503719G>A  | Missense Mutation | INADL  | p.E1344K | InaD-like (Drosophila)     | 107 (0.00) | 75 (0.27)  | 0.71 |
| 11-02 | Gp4 Focus 2 | g.chr1:62594600G>A  | Missense Mutation | INADL  | p.G1752R | InaD-like (Drosophila)     | 84 (0.00)  | 19 (0.47)  | 1.26 |
| 11-02 | Gp4 Focus 2 | g.chr2:206869744G>A | Missense Mutation | INO80D | p.T811I  | INO80 complex subunit      | 64 (0.00)  | 130 (0.17) | 0.45 |
| 11-02 | Gp4 Focus 2 | g.chr2:206872165C>T | Splice Site       | INO80D | p.R587R  | INO80 complex subunit      | 52 (0.00)  | 122 (0.16) | 0.42 |
| 11-02 | Gp4 Focus 2 | g.chr2:191224916C>T | Nonsense Mutation | INPP1  | p.Q30*   | inositol polyphosphate-    | 148 (0.00) | 34 (0.15)  | 0.39 |
| 11-02 | Gp4 Focus 2 | g.chr2:99169292G>A  | Missense Mutation | INPP4A | p.V408I  | inositol polyphosphate-    | 39 (0.00)  | 19 (0.37)  | 0.98 |
| 11-02 | Gp4 Focus 2 | g.chr4:142950004C>T | Missense Mutation | INPP4B | p.M902I  | inositol polyphosphate-    | 40 (0.00)  | 16 (0.50)  | 1.33 |
| 11-02 | Gp4 Focus 2 | g.chr4:142953555C>T | Intron            | INPP4B |          | inositol polyphosphate-    | 19 (0.00)  | 20 (0.40)  | 1.07 |
| 11-02 | Gp4 Focus 2 | g.chr4:142961437C>T | Intron            | INPP4B |          | inositol polyphosphate-    | 40 (0.00)  | 23 (0.26)  | 0.70 |
| 11-02 | Gp4 Focus 2 | g.chr4:142965437C>G | Intron            | INPP4B |          | inositol polyphosphate-    | 22 (0.00)  | 24 (0.62)  | 1.67 |
| 11-02 | Gp4 Focus 2 | g.chr4:142969601C>T | Intron            | INPP4B |          | inositol polyphosphate-    | 97 (0.01)  | 16 (0.56)  | 1.50 |
| 11-02 | Gp4 Focus 2 | g.chr4:143007000C>T | Intron            | INPP4B |          | inositol polyphosphate-    | 60 (0.00)  | 13 (0.54)  | 1.44 |
| 11-02 | Gp4 Focus 2 | g.chr4:143012948G>A | Intron            | INPP4B |          | inositol polyphosphate-    | 51 (0.00)  | 34 (0.32)  | 0.86 |
| 11-02 | Gp4 Focus 2 | g.chr4:143019945G>A | Intron            | INPP4B |          | inositol polyphosphate-    | 30 (0.00)  | 37 (0.35)  | 0.94 |
| 11-02 | Gp4 Focus 2 | g.chr4:143057876G>C | Intron            | INPP4B |          | inositol polyphosphate-    | 63 (0.00)  | 21 (0.24)  | 0.63 |
| 11-02 | Gp4 Focus 2 | g.chr4:143059844T>C | Intron            | INPP4B |          | inositol polyphosphate-    | 118 (0.00) | 21 (0.29)  | 0.76 |
| 11-02 | Gp4 Focus 2 | g.chr4:143069117G>A | Intron            | INPP4B |          | inositol polyphosphate-    | 119 (0.00) | 39 (0.23)  | 0.62 |
| 11-02 | Gp4 Focus 2 | g.chr4:143072416C>T | Intron            | INPP4B |          | inositol polyphosphate-    | 72 (0.00)  | 23 (0.26)  | 0.70 |
| 11-02 | Gp4 Focus 2 | g.chr4:143075816G>A | Intron            | INPP4B |          | inositol polyphosphate-    | 23 (0.00)  | 20 (0.30)  | 0.80 |
| 11-02 | Gp4 Focus 2 | g.chr4:143086183G>A | Intron            | INPP4B |          | inositol polyphosphate-    | 59 (0.00)  | 19 (0.26)  | 0.70 |
| 11-02 | Gp4 Focus 2 | g.chr4:143106229C>A | Intron            | INPP4B |          | inositol polyphosphate-    | 38 (0.00)  | 17 (0.29)  | 0.78 |
| 11-02 | Gp4 Focus 2 | g.chr4:143124134C>T | Intron            | INPP4B |          | inositol polyphosphate-    | 113 (0.00) | 37 (0.32)  | 0.86 |
| 11-02 | Gp4 Focus 2 | g.chr4:143187183G>A | Intron            | INPP4B |          | inositol polyphosphate-    | 38 (0.00)  | 34 (0.21)  | 0.55 |

|       |             |                     |        |        |         |                                            |           |      |
|-------|-------------|---------------------|--------|--------|---------|--------------------------------------------|-----------|------|
| 11-02 | Gp4 Focus 2 | g.chr4:143226613C>T | Silent | INPP4B | p.L167L | inositol polyphosphate- $\zeta$ 121 (0.00) | 37 (0.22) | 0.58 |
| 11-02 | Gp4 Focus 2 | g.chr4:143239509G>A | Intron | INPP4B |         | inositol polyphosphate- $\zeta$ 37 (0.00)  | 41 (0.24) | 0.65 |
| 11-02 | Gp4 Focus 2 | g.chr4:143239542G>A | Intron | INPP4B |         | inositol polyphosphate- $\zeta$ 34 (0.00)  | 40 (0.35) | 0.93 |
| 11-02 | Gp4 Focus 2 | g.chr4:143241383C>A | Intron | INPP4B |         | inositol polyphosphate- $\zeta$ 32 (0.00)  | 17 (0.41) | 1.10 |
| 11-02 | Gp4 Focus 2 | g.chr4:143257674C>T | Intron | INPP4B |         | inositol polyphosphate- $\zeta$ 30 (0.00)  | 19 (0.37) | 0.98 |
| 11-02 | Gp4 Focus 2 | g.chr4:143260035A>C | Intron | INPP4B |         | inositol polyphosphate- $\zeta$ 61 (0.00)  | 21 (0.24) | 0.63 |
| 11-02 | Gp4 Focus 2 | g.chr4:143266727C>T | Intron | INPP4B |         | inositol polyphosphate- $\zeta$ 39 (0.00)  | 51 (0.24) | 0.63 |
| 11-02 | Gp4 Focus 2 | g.chr4:143269487G>A | Intron | INPP4B |         | inositol polyphosphate- $\zeta$ 82 (0.00)  | 18 (0.67) | 1.78 |
| 11-02 | Gp4 Focus 2 | g.chr4:143289135C>T | Intron | INPP4B |         | inositol polyphosphate- $\zeta$ 60 (0.02)  | 34 (0.18) | 0.47 |
| 11-02 | Gp4 Focus 2 | g.chr4:143290275G>A | Intron | INPP4B |         | inositol polyphosphate- $\zeta$ 55 (0.00)  | 17 (0.29) | 0.78 |
| 11-02 | Gp4 Focus 2 | g.chr4:143293712A>G | Intron | INPP4B |         | inositol polyphosphate- $\zeta$ 180 (0.00) | 19 (0.37) | 0.98 |
| 11-02 | Gp4 Focus 2 | g.chr4:143293768C>A | Intron | INPP4B |         | inositol polyphosphate- $\zeta$ 187 (0.00) | 21 (0.33) | 0.89 |
| 11-02 | Gp4 Focus 2 | g.chr4:143299687C>G | Intron | INPP4B |         | inositol polyphosphate- $\zeta$ 91 (0.00)  | 27 (0.41) | 1.09 |
| 11-02 | Gp4 Focus 2 | g.chr4:143309946G>T | Intron | INPP4B |         | inositol polyphosphate- $\zeta$ 139 (0.01) | 15 (0.33) | 0.89 |
| 11-02 | Gp4 Focus 2 | g.chr4:143336473G>A | Intron | INPP4B |         | inositol polyphosphate- $\zeta$ 15 (0.00)  | 39 (0.23) | 0.62 |
| 11-02 | Gp4 Focus 2 | g.chr4:143339927A>G | Intron | INPP4B |         | inositol polyphosphate- $\zeta$ 55 (0.00)  | 53 (0.17) | 0.45 |
| 11-02 | Gp4 Focus 2 | g.chr4:143353955G>A | Intron | INPP4B |         | inositol polyphosphate- $\zeta$ 17 (0.00)  | 19 (0.26) | 0.70 |
| 11-02 | Gp4 Focus 2 | g.chr4:143419437G>A | Intron | INPP4B |         | inositol polyphosphate- $\zeta$ 61 (0.00)  | 20 (0.30) | 0.80 |
| 11-02 | Gp4 Focus 2 | g.chr4:143452060G>A | Intron | INPP4B |         | inositol polyphosphate- $\zeta$ 110 (0.00) | 61 (0.16) | 0.44 |
| 11-02 | Gp4 Focus 2 | g.chr4:143458296G>A | Intron | INPP4B |         | inositol polyphosphate- $\zeta$ 77 (0.00)  | 39 (0.15) | 0.41 |
| 11-02 | Gp4 Focus 2 | g.chr4:143462545G>A | Intron | INPP4B |         | inositol polyphosphate- $\zeta$ 98 (0.00)  | 27 (0.44) | 1.19 |
| 11-02 | Gp4 Focus 2 | g.chr4:143469322G>A | Intron | INPP4B |         | inositol polyphosphate- $\zeta$ 21 (0.00)  | 29 (0.21) | 0.55 |
| 11-02 | Gp4 Focus 2 | g.chr4:143476595G>A | Intron | INPP4B |         | inositol polyphosphate- $\zeta$ 66 (0.00)  | 54 (0.30) | 0.79 |
| 11-02 | Gp4 Focus 2 | g.chr4:143494383C>G | Intron | INPP4B |         | inositol polyphosphate- $\zeta$ 57 (0.00)  | 19 (0.42) | 1.12 |
| 11-02 | Gp4 Focus 2 | g.chr4:143507547C>A | Intron | INPP4B |         | inositol polyphosphate- $\zeta$ 135 (0.00) | 70 (0.14) | 0.38 |
| 11-02 | Gp4 Focus 2 | g.chr4:143507587G>T | Intron | INPP4B |         | inositol polyphosphate- $\zeta$ 126 (0.00) | 43 (0.16) | 0.43 |
| 11-02 | Gp4 Focus 2 | g.chr4:143520092G>A | Intron | INPP4B |         | inositol polyphosphate- $\zeta$ 20 (0.00)  | 9 (0.56)  | 1.48 |
| 11-02 | Gp4 Focus 2 | g.chr4:143535347C>T | Intron | INPP4B |         | inositol polyphosphate- $\zeta$ 19 (0.00)  | 53 (0.21) | 0.55 |
| 11-02 | Gp4 Focus 2 | g.chr4:143550383G>A | Intron | INPP4B |         | inositol polyphosphate- $\zeta$ 49 (0.00)  | 28 (0.18) | 0.48 |
| 11-02 | Gp4 Focus 2 | g.chr4:143583756C>T | Intron | INPP4B |         | inositol polyphosphate- $\zeta$ 39 (0.00)  | 41 (0.22) | 0.59 |
| 11-02 | Gp4 Focus 2 | g.chr4:143591824G>A | Intron | INPP4B |         | inositol polyphosphate- $\zeta$ 34 (0.00)  | 22 (0.73) | 1.94 |
| 11-02 | Gp4 Focus 2 | g.chr4:143604324C>T | Intron | INPP4B |         | inositol polyphosphate- $\zeta$ 94 (0.00)  | 37 (0.22) | 0.58 |
| 11-02 | Gp4 Focus 2 | g.chr4:143620046G>A | Intron | INPP4B |         | inositol polyphosphate- $\zeta$ 61 (0.00)  | 14 (0.43) | 1.14 |
| 11-02 | Gp4 Focus 2 | g.chr4:143620219C>T | Intron | INPP4B |         | inositol polyphosphate- $\zeta$ 182 (0.01) | 51 (0.27) | 0.73 |
| 11-02 | Gp4 Focus 2 | g.chr4:143634178G>A | Intron | INPP4B |         | inositol polyphosphate- $\zeta$ 53 (0.00)  | 27 (0.26) | 0.69 |



|       |             |                     |                   |         |          |                                             |           |      |
|-------|-------------|---------------------|-------------------|---------|----------|---------------------------------------------|-----------|------|
| 11-02 | Gp4 Focus 2 | g.chr4:143639335G>A | Intron            | INPP4B  |          | inositol polyphosphate- $\gamma$ 150 (0.01) | 18 (0.28) | 0.74 |
| 11-02 | Gp4 Focus 2 | g.chr4:143654870G>A | Intron            | INPP4B  |          | inositol polyphosphate- $\gamma$ 45 (0.00)  | 23 (0.61) | 1.62 |
| 11-02 | Gp4 Focus 2 | g.chr4:143692716C>T | Intron            | INPP4B  |          | inositol polyphosphate- $\gamma$ 30 (0.00)  | 14 (0.71) | 1.90 |
| 11-02 | Gp4 Focus 2 | g.chr4:143717703C>T | Intron            | INPP4B  |          | inositol polyphosphate- $\gamma$ 103 (0.00) | 37 (0.68) | 1.80 |
| 11-02 | Gp4 Focus 2 | g.chr4:143726808T>C | Intron            | INPP4B  |          | inositol polyphosphate- $\gamma$ 24 (0.00)  | 14 (0.36) | 0.95 |
| 11-02 | Gp4 Focus 2 | g.chr4:143728569G>A | Intron            | INPP4B  |          | inositol polyphosphate- $\gamma$ 45 (0.00)  | 15 (0.40) | 1.07 |
| 11-02 | Gp4 Focus 2 | g.chr4:143732519G>A | Intron            | INPP4B  |          | inositol polyphosphate- $\gamma$ 18 (0.00)  | 16 (0.44) | 1.17 |
| 11-02 | Gp4 Focus 2 | g.chr4:143741113C>T | Intron            | INPP4B  |          | inositol polyphosphate- $\gamma$ 71 (0.00)  | 54 (0.35) | 0.94 |
| 11-02 | Gp4 Focus 2 | g.chr4:143747606G>A | Intron            | INPP4B  |          | inositol polyphosphate- $\gamma$ 40 (0.00)  | 10 (0.70) | 1.87 |
| 11-02 | Gp4 Focus 2 | g.chr17:1401413C>T  | Silent            | INPP5K  | p.E260E  | inositol polyphosphate- $\delta$ 21 (0.00)  | 53 (0.17) | 0.45 |
| 11-02 | Gp4 Focus 2 | g.chr17:1413070C>T  | Silent            | INPP5K  | p.G95G   | inositol polyphosphate- $\delta$ 74 (0.00)  | 35 (0.14) | 0.38 |
| 11-02 | Gp4 Focus 2 | g.chr17:1413089G>A  | Missense Mutation | INPP5K  | p.S89F   | inositol polyphosphate- $\delta$ 73 (0.00)  | 41 (0.15) | 0.39 |
| 11-02 | Gp4 Focus 2 | g.chr11:77672059A>C | Missense Mutation | INTS4   | p.I199M  | integrator complex subu 76 (0.00)           | 19 (0.47) | 1.26 |
| 11-02 | Gp4 Focus 2 | g.chr11:77672078G>A | Missense Mutation | INTS4   | p.A193V  | integrator complex subu 77 (0.01)           | 23 (0.43) | 1.16 |
| 11-02 | Gp4 Focus 2 | g.chr7:64662999G>A  | RNA               | INTS4L1 |          | integrator complex subu 32 (0.00)           | 31 (0.35) | 1.53 |
| 11-02 | Gp4 Focus 2 | g.chr3:49765570G>A  | Missense Mutation | IP6K1   | p.S253L  | inositol hexakisphospha 30 (0.00)           | 47 (0.36) | 0.96 |
| 11-02 | Gp4 Focus 2 | g.chr1:44423714C>T  | Missense Mutation | IPO13   | p.H536Y  | importin 13 21 (0.00)                       | 27 (0.70) | 1.88 |
| 11-02 | Gp4 Focus 2 | g.chr13:98654723G>A | Missense Mutation | IPO5    | p.D371N  | importin 5 32 (0.00)                        | 36 (0.17) | 0.44 |
| 11-02 | Gp4 Focus 2 | g.chr2:237240091G>A | Nonsense Mutation | IQCA1   | p.Q762*  | IQ motif containing witl 77 (0.01)          | 35 (0.14) | 0.38 |
| 11-02 | Gp4 Focus 2 | g.chr2:237240118C>T | Missense Mutation | IQCA1   | p.V753M  | IQ motif containing witl 80 (0.00)          | 35 (0.17) | 0.46 |
| 11-02 | Gp4 Focus 2 | g.chr3:121489380G>A | Missense Mutation | IQCB1   | p.L537F  | IQ motif containing B1 74 (0.00)            | 58 (0.53) | 1.43 |
| 11-02 | Gp4 Focus 2 | g.chr15:67713874G>A | Missense Mutation | IQCH    | p.D822N  | IQ motif containing H 36 (0.00)             | 18 (0.44) | 1.19 |
| 11-02 | Gp4 Focus 2 | g.chr15:91030778G>A | Silent            | IQGAP1  | p.L1404L | IQ motif containing GT 63 (0.00)            | 11 (0.64) | 1.70 |
| 11-02 | Gp4 Focus 2 | g.chr5:75991412G>A  | Missense Mutation | IQGAP2  | p.R1376K | IQ motif containing GT 34 (0.00)            | 33 (0.15) | 0.40 |
| 11-02 | Gp4 Focus 2 | g.chr3:10264387G>A  | Missense Mutation | IRAK2   | p.V361I  | interleukin-1 receptor- $\alpha$ 17 (0.00)  | 35 (0.17) | 0.46 |
| 11-02 | Gp4 Focus 2 | g.chr6:401510C>T    | Missense Mutation | IRF4    | p.H278Y  | interferon regulatory fac 18 (0.00)         | 12 (0.75) | 1.43 |
| 11-02 | Gp4 Focus 2 | g.chr2:227660524C>T | Silent            | IRS1    | p.R977R  | insulin receptor substrat 41 (0.00)         | 48 (0.29) | 0.78 |
| 11-02 | Gp4 Focus 2 | g.chr1:156694016C>T | Missense Mutation | ISG20L2 | p.R291Q  | interferon stimulated ex 40 (0.00)          | 14 (0.43) | 1.14 |
| 11-02 | Gp4 Focus 2 | g.chr14:77950766G>A | Missense Mutation | ISM2    | p.T176M  | isthmin 2 21 (0.00)                         | 38 (0.53) | 1.40 |
| 11-02 | Gp4 Focus 2 | g.chr3:128852953C>T | Missense Mutation | ISY1    | p.G211R  | ISY1 splicing factor hor 29 (0.00)          | 20 (0.30) | 0.80 |
| 11-02 | Gp4 Focus 2 | g.chr16:47196526G>A | Silent            | ITFG1   | p.N501N  | integrin alpha FG-GAP 96 (0.00)             | 50 (0.52) | 1.39 |
| 11-02 | Gp4 Focus 2 | g.chr16:304665G>T   | Missense Mutation | ITFG3   | p.D85Y   | integrin alpha FG-GAP 46 (0.00)             | 68 (0.21) | 0.66 |
| 11-02 | Gp4 Focus 2 | g.chr5:52344268G>A  | Missense Mutation | ITGA2   | p.D155N  | integrin, alpha 2 (CD49) 116 (0.00)         | 65 (0.12) | 0.41 |
| 11-02 | Gp4 Focus 2 | g.chr2:173330375C>T | Silent            | ITGA6   | p.I97I   | integrin, alpha 6 29 (0.00)                 | 27 (0.22) | 0.59 |
| 11-02 | Gp4 Focus 2 | g.chr17:3638153G>A  | Silent            | ITGAE   | p.A871A  | integrin, alpha E (antige 44 (0.00)         | 13 (0.38) | 1.03 |

|       |             |                     |                   |        |          |                                      |           |           |      |
|-------|-------------|---------------------|-------------------|--------|----------|--------------------------------------|-----------|-----------|------|
| 11-02 | Gp4 Focus 2 | g.chr17:3643131G>T  | Silent            | ITGAE  | p.V830V  | integrin, alpha E (antige 19 (0.00)  | 26 (0.35) | 0.92      |      |
| 11-02 | Gp4 Focus 2 | g.chr17:3653660C>A  | Missense Mutation | ITGAE  | p.Q670H  | integrin, alpha E (antige 25 (0.00)  | 15 (0.33) | 0.89      |      |
| 11-02 | Gp4 Focus 2 | g.chr10:33208872G>A | Silent            | ITGB1  | p.G470G  | integrin, beta 1 (fibronec 72 (0.00) | 16 (0.44) | 1.46      |      |
| 11-02 | Gp4 Focus 2 | g.chr2:161029087G>A | Missense Mutation | ITGB6  | p.T263I  | integrin, beta 6                     | 15 (0.00) | 14 (0.43) | 1.14 |
| 11-02 | Gp4 Focus 2 | g.chr12:53589413G>A | Silent            | ITGB7  | p.Y356Y  | integrin, beta 7                     | 25 (0.00) | 24 (0.67) | 1.78 |
| 11-02 | Gp4 Focus 2 | g.chr7:20420388G>A  | Silent            | ITGB8  | p.K245K  | integrin, beta 8                     | 78 (0.00) | 18 (0.56) | 1.48 |
| 11-02 | Gp4 Focus 2 | g.chr3:4725141C>T   | Missense Mutation | ITPR1  | p.T1063M | inositol 1,4,5-trisphosph 106 (0.00) | 70 (0.30) | 0.80      |      |
| 11-02 | Gp4 Focus 2 | g.chr12:26869148T>A | Missense Mutation | ITPR2  | p.M185L  | inositol 1,4,5-trisphosph 39 (0.00)  | 12 (0.50) | 1.33      |      |
| 11-02 | Gp4 Focus 2 | g.chr12:26869149C>A | Missense Mutation | ITPR2  | p.L184F  | inositol 1,4,5-trisphosph 39 (0.00)  | 12 (0.50) | 1.33      |      |
| 11-02 | Gp4 Focus 2 | g.chr20:10625595G>A | Missense Mutation | JAG1   | p.H754Y  | jagged 1                             | 19 (0.00) | 40 (0.30) | 0.80 |
| 11-02 | Gp4 Focus 2 | g.chr19:17945699C>T | Missense Mutation | JAK3   | p.G721S  | Janus kinase 3                       | 19 (0.00) | 23 (0.26) | 0.70 |
| 11-02 | Gp4 Focus 2 | g.chr19:17949123G>A | Silent            | JAK3   | p.Y506Y  | Janus kinase 3                       | 25 (0.00) | 16 (0.38) | 1.00 |
| 11-02 | Gp4 Focus 2 | g.chr16:733072G>T   | Missense Mutation | JMJD8  | p.P199T  | jumonji domain containi 26 (0.00)    | 30 (0.30) | 0.96      |      |
| 11-02 | Gp4 Focus 2 | g.chr22:39095813G>A | Silent            | JOSD1  | p.F60F   | Josephin domain contain 82 (0.00)    | 47 (0.15) | 0.40      |      |
| 11-02 | Gp4 Focus 2 | g.chr3:124160822G>A | Missense Mutation | KALRN  | p.V1075M | kalirin, RhoGEF kinase 38 (0.00)     | 17 (0.53) | 1.41      |      |
| 11-02 | Gp4 Focus 2 | g.chr9:713136G>A    | Silent            | KANK1  | p.L790L  | KN motif and ankyrin r 51 (0.00)     | 54 (0.17) | 0.44      |      |
| 11-02 | Gp4 Focus 2 | g.chr12:49061475C>T | Splice Site       | KANSL2 |          | KAT8 regulatory NSL c 29 (0.00)      | 73 (0.15) | 0.40      |      |
| 11-02 | Gp4 Focus 2 | g.chr2:97271081G>A  | Missense Mutation | KANSL3 | p.P637S  | KAT8 regulatory NSL c 38 (0.00)      | 19 (0.26) | 0.70      |      |
| 11-02 | Gp4 Focus 2 | g.chr2:97278074G>A  | Missense Mutation | KANSL3 | p.P344L  | KAT8 regulatory NSL c 99 (0.00)      | 27 (0.19) | 0.49      |      |
| 11-02 | Gp4 Focus 2 | g.chr17:40271583C>T | Missense Mutation | KAT2A  | p.V285M  | K(lysine) acetyltransfer 47 (0.00)   | 47 (0.21) | 0.57      |      |
| 11-02 | Gp4 Focus 2 | g.chr11:65482121G>A | Silent            | KAT5   | p.P249P  | K(lysine) acetyltransfer 56 (0.00)   | 26 (0.23) | 0.62      |      |
| 11-02 | Gp4 Focus 2 | g.chr8:41791615C>T  | Missense Mutation | KAT6A  | p.E1375K | K(lysine) acetyltransfer 15 (0.00)   | 11 (0.55) | 1.76      |      |
| 11-02 | Gp4 Focus 2 | g.chr17:47899083G>A | Silent            | KAT7   | p.E439E  | K(lysine) acetyltransfer 15 (0.00)   | 15 (0.60) | 1.60      |      |
| 11-02 | Gp4 Focus 2 | g.chr12:5021828C>T  | Silent            | KCNA1  | p.L428L  | potassium voltage-gated 111 (0.00)   | 31 (0.68) | 1.81      |      |
| 11-02 | Gp4 Focus 2 | g.chr1:111146798G>A | Missense Mutation | KCNA2  | p.H203Y  | potassium voltage-gated 29 (0.00)    | 35 (0.51) | 1.07      |      |
| 11-02 | Gp4 Focus 2 | g.chr1:111215744T>A | Missense Mutation | KCNA3  | p.N563I  | potassium voltage-gated 15 (0.00)    | 22 (0.23) | 0.47      |      |
| 11-02 | Gp4 Focus 2 | g.chr1:110766145G>A | Missense Mutation | KCNC4  | p.R413Q  | potassium voltage-gated 39 (0.00)    | 15 (0.67) | 1.39      |      |
| 11-02 | Gp4 Focus 2 | g.chr7:120386073G>A | Silent            | KCND2  | p.L569L  | potassium voltage-gated 23 (0.00)    | 25 (0.40) | 1.07      |      |
| 11-02 | Gp4 Focus 2 | g.chr1:211192208C>A | Nonsense Mutation | KCNH1  | p.E317*  | potassium voltage-gated 42 (0.02)    | 15 (0.33) | 0.89      |      |
| 11-02 | Gp4 Focus 2 | g.chr2:163256771G>A | Missense Mutation | KCNH7  | p.L779F  | potassium voltage-gated 29 (0.00)    | 18 (0.28) | 0.74      |      |
| 11-02 | Gp4 Focus 2 | g.chr3:19575208G>A  | Missense Mutation | KCNH8  | p.A981T  | potassium voltage-gated 76 (0.00)    | 43 (0.37) | 0.99      |      |
| 11-02 | Gp4 Focus 2 | g.chr2:18112486C>T  | Missense Mutation | KCNS3  | p.R71W   | potassium voltage-gated 46 (0.00)    | 47 (0.17) | 0.45      |      |
| 11-02 | Gp4 Focus 2 | g.chr8:36663894G>A  | Nonsense Mutation | KCNU1  | p.W192*  | potassium channel, subf 51 (0.00)    | 12 (0.42) | 1.35      |      |
| 11-02 | Gp4 Focus 2 | g.chr8:36694344G>A  | Missense Mutation | KCNU1  | p.D467N  | potassium channel, subf 114 (0.01)   | 64 (0.12) | 0.40      |      |
| 11-02 | Gp4 Focus 2 | g.chr8:110984767C>A | Silent            | KCNV1  | p.L237L  | potassium channel, subf 21 (0.00)    | 19 (0.32) | 1.08      |      |

|       |             |                      |                   |           |          |                          |            |           |      |
|-------|-------------|----------------------|-------------------|-----------|----------|--------------------------|------------|-----------|------|
| 11-02 | Gp4 Focus 2 | g.chr18:24081158C>T  | Silent            | KCTD1     | p.L14L   | potassium channel tetra  | 69 (0.01)  | 17 (0.53) | 1.41 |
| 11-02 | Gp4 Focus 2 | g.chr12:109907378C>T | Silent            | KCTD10    | p.Q53Q   | potassium channel tetra  | 20 (0.00)  | 25 (0.28) | 0.75 |
| 11-02 | Gp4 Focus 2 | g.chr6:36454913C>T   | Silent            | KCTD20    | p.A407A  | potassium channel tetra  | 92 (0.00)  | 27 (0.22) | 0.59 |
| 11-02 | Gp4 Focus 2 | g.chr11:108345643G>A | Missense Mutation | KDEL2     | p.R479C  | KDEL (Lys-Asp-Glu-L      | 28 (0.00)  | 24 (0.21) | 0.56 |
| 11-02 | Gp4 Focus 2 | g.chr22:38877456G>A  | Silent            | KDELR3    | p.L197L  | KDEL (Lys-Asp-Glu-L      | 60 (0.00)  | 21 (0.29) | 0.76 |
| 11-02 | Gp4 Focus 2 | g.chr1:44156556C>A   | Nonsense Mutation | KDM4A     | p.S693*  | lysine (K)-specific dem  | 91 (0.01)  | 14 (0.43) | 1.14 |
| 11-02 | Gp4 Focus 2 | g.chrX:53228310C>T   | Missense Mutation | KDM5C     | p.E698K  | lysine (K)-specific dem  | 19 (0.00)  | 23 (0.43) | 0.72 |
| 11-02 | Gp4 Focus 2 | g.chr4:55974057G>A   | Missense Mutation | KDR       | p.P420L  | kinase insert domain rec | 36 (0.00)  | 20 (0.25) | 0.67 |
| 11-02 | Gp4 Focus 2 | g.chr18:61011691G>A  | Silent            | KDSR      | p.Y215Y  | 3-ketodihydrosphingosii  | 71 (0.01)  | 25 (0.24) | 0.77 |
| 11-02 | Gp4 Focus 2 | g.chr18:61011701G>A  | Missense Mutation | KDSR      | p.T212I  | 3-ketodihydrosphingosii  | 72 (0.00)  | 25 (0.20) | 0.64 |
| 11-02 | Gp4 Focus 2 | g.chr8:136619234C>T  | Nonsense Mutation | KHDRBS3   | p.Q282*  | KH domain containing,    | 29 (0.00)  | 23 (0.61) | 1.62 |
| 11-02 | Gp4 Focus 2 | g.chr17:26959250G>A  | Silent            | KIAA0100  | p.S1271S | KIAA0100                 | 47 (0.00)  | 50 (0.48) | 1.28 |
| 11-02 | Gp4 Focus 2 | g.chr17:26962168G>A  | Missense Mutation | KIAA0100  | p.R813W  | KIAA0100                 | 41 (0.00)  | 66 (0.18) | 0.48 |
| 11-02 | Gp4 Focus 2 | g.chr4:6863127G>A    | Missense Mutation | KIAA0232  | p.E340K  | KIAA0232                 | 64 (0.00)  | 19 (0.37) | 0.98 |
| 11-02 | Gp4 Focus 2 | g.chr14:70175644G>A  | Missense Mutation | KIAA0247  | p.G237R  | KIAA0247                 | 33 (0.00)  | 30 (0.30) | 0.80 |
| 11-02 | Gp4 Focus 2 | g.chr6:24576733C>T   | Missense Mutation | KIAA0319  | p.A533T  | KIAA0319                 | 66 (0.00)  | 55 (0.25) | 0.68 |
| 11-02 | Gp4 Focus 2 | g.chr6:127768680T>A  | Missense Mutation | KIAA0408  | p.N262Y  | KIAA0408                 | 88 (0.00)  | 29 (0.34) | 0.92 |
| 11-02 | Gp4 Focus 2 | g.chr16:27640054C>T  | Silent            | KIAA0556  | p.V71V   | KIAA0556                 | 70 (0.00)  | 55 (0.16) | 0.44 |
| 11-02 | Gp4 Focus 2 | g.chr14:58895117G>A  | Silent            | KIAA0586  | p.P57P   | KIAA0586                 | 63 (0.00)  | 22 (0.27) | 0.73 |
| 11-02 | Gp4 Focus 2 | g.chr14:58949331G>A  | Silent            | KIAA0586  | p.E1068E | KIAA0586                 | 104 (0.00) | 69 (0.14) | 0.39 |
| 11-02 | Gp4 Focus 2 | g.chr16:67210836G>A  | Silent            | KIAA0895L | p.L432L  | KIAA0895-like            | 38 (0.00)  | 38 (0.18) | 0.49 |
| 11-02 | Gp4 Focus 2 | g.chr1:155885749C>T  | Silent            | KIAA0907  | p.L520L  | KIAA0907                 | 38 (0.00)  | 41 (0.15) | 0.39 |
| 11-02 | Gp4 Focus 2 | g.chr1:92634463G>A   | Nonsense Mutation | KIAA1107  | p.W57*   | KIAA1107                 | 74 (0.00)  | 36 (0.22) | 0.59 |
| 11-02 | Gp4 Focus 2 | g.chr4:123185467G>A  | Missense Mutation | KIAA1109  | p.S2401N | KIAA1109                 | 43 (0.00)  | 19 (0.32) | 0.84 |
| 11-02 | Gp4 Focus 2 | g.chr10:24809167G>A  | Missense Mutation | KIAA1217  | p.V448I  | KIAA1217                 | 22 (0.00)  | 16 (0.44) | 1.46 |
| 11-02 | Gp4 Focus 2 | g.chr6:138576606G>T  | Missense Mutation | KIAA1244  | p.L268F  | KIAA1244                 | 105 (0.00) | 17 (0.47) | 1.25 |
| 11-02 | Gp4 Focus 2 | g.chr6:138576607G>T  | Missense Mutation | KIAA1244  | p.G269W  | KIAA1244                 | 105 (0.00) | 17 (0.47) | 1.25 |
| 11-02 | Gp4 Focus 2 | g.chr6:138601151C>T  | Nonsense Mutation | KIAA1244  | p.Q771*  | KIAA1244                 | 29 (0.00)  | 39 (0.26) | 0.68 |
| 11-02 | Gp4 Focus 2 | g.chr6:138649199C>G  | Missense Mutation | KIAA1244  | p.N1681K | KIAA1244                 | 51 (0.00)  | 14 (0.57) | 1.52 |
| 11-02 | Gp4 Focus 2 | g.chr9:5747414C>T    | Missense Mutation | KIAA1432  | p.P454L  |                          | 28 (0.00)  | 35 (0.20) | 0.53 |
| 11-02 | Gp4 Focus 2 | g.chr1:33233684G>A   | Missense Mutation | KIAA1522  | p.G84D   | KIAA1522                 | 48 (0.00)  | 33 (0.39) | 1.05 |
| 11-02 | Gp4 Focus 2 | g.chr7:138555953G>A  | Missense Mutation | KIAA1549  | p.R1501C | KIAA1549                 | 20 (0.00)  | 97 (0.19) | 0.49 |
| 11-02 | Gp4 Focus 2 | g.chr7:138579136C>T  | Silent            | KIAA1549  | p.K1328K | KIAA1549                 | 47 (0.00)  | 43 (0.16) | 0.43 |
| 11-02 | Gp4 Focus 2 | g.chr7:138583735G>C  | Missense Mutation | KIAA1549  | p.I1271M | KIAA1549                 | 55 (0.00)  | 29 (0.31) | 0.83 |
| 11-02 | Gp4 Focus 2 | g.chr11:33564636G>A  | Silent            | KIAA1549L | p.Q212Q  | KIAA1549-like            | 29 (0.00)  | 52 (0.38) | 1.03 |

|       |             |                     |                   |           |          |                             |            |           |      |
|-------|-------------|---------------------|-------------------|-----------|----------|-----------------------------|------------|-----------|------|
| 11-02 | Gp4 Focus 2 | g.chr11:33565623C>T | Silent            | KIAA1549L | p.N541N  | KIAA1549-like               | 121 (0.00) | 33 (0.64) | 1.70 |
| 11-02 | Gp4 Focus 2 | g.chr1:180885981G>A | Missense Mutation | KIAA1614  | p.V248M  | KIAA1614                    | 60 (0.02)  | 30 (0.63) | 1.69 |
| 11-02 | Gp4 Focus 2 | g.chr11:93439971G>A | Missense Mutation | KIAA1731  | p.S66N   | KIAA1731                    | 26 (0.00)  | 25 (0.28) | 0.75 |
| 11-02 | Gp4 Focus 2 | g.chr11:93454533G>A | Silent            | KIAA1731  | p.E115E  | KIAA1731                    | 108 (0.00) | 28 (0.32) | 0.86 |
| 11-02 | Gp4 Focus 2 | g.chr9:115336796G>A | Missense Mutation | KIAA1958  | p.D146N  | KIAA1958                    | 29 (0.00)  | 17 (0.47) | 1.25 |
| 11-02 | Gp4 Focus 2 | g.chr9:115337400C>T | Missense Mutation | KIAA1958  | p.P347L  | KIAA1958                    | 90 (0.00)  | 30 (0.17) | 0.44 |
| 11-02 | Gp4 Focus 2 | g.chr9:115421596G>A | Silent            | KIAA1958  | p.K466K  | KIAA1958                    | 17 (0.00)  | 28 (0.25) | 0.67 |
| 11-02 | Gp4 Focus 2 | g.chr3:113388970G>A | Nonsense Mutation | KIAA2018  | p.Q53*   | KIAA2018                    | 25 (0.00)  | 26 (0.19) | 0.51 |
| 11-02 | Gp4 Focus 2 | g.chr3:44852383G>A  | Missense Mutation | KIF15     | p.V673I  | kinesin family member       | 40 (0.00)  | 10 (0.80) | 2.13 |
| 11-02 | Gp4 Focus 2 | g.chr5:137517189C>T | Nonsense Mutation | KIF20A    | p.Q82*   | kinesin family member       | 85 (0.00)  | 55 (0.38) | 1.02 |
| 11-02 | Gp4 Focus 2 | g.chr10:91498746C>T | Missense Mutation | KIF20B    | p.R1230C | kinesin family member       | 45 (0.00)  | 12 (0.42) | 1.11 |
| 11-02 | Gp4 Focus 2 | g.chr15:69728087G>A | Missense Mutation | KIF23     | p.A417T  | kinesin family member       | 18 (0.00)  | 13 (0.69) | 1.85 |
| 11-02 | Gp4 Focus 2 | g.chr9:34255917G>A  | Missense Mutation | KIF24     | p.L1230F | kinesin family member       | 85 (0.00)  | 27 (0.37) | 0.99 |
| 11-02 | Gp4 Focus 2 | g.chr9:34255972T>C  | Silent            | KIF24     | p.G1211G | kinesin family member       | 75 (0.00)  | 24 (0.38) | 1.00 |
| 11-02 | Gp4 Focus 2 | g.chr9:34256713G>A  | Silent            | KIF24     | p.A964A  | kinesin family member       | 23 (0.00)  | 12 (0.50) | 1.33 |
| 11-02 | Gp4 Focus 2 | g.chr1:45218877G>T  | Missense Mutation | KIF2C     | p.E171D  | kinesin family member       | 15 (0.00)  | 27 (0.22) | 0.59 |
| 11-02 | Gp4 Focus 2 | g.chr2:149818609A>G | Missense Mutation | KIF5C     | p.M365V  | kinesin family member       | 90 (0.00)  | 79 (0.13) | 0.41 |
| 11-02 | Gp4 Focus 2 | g.chr2:149818610T>A | Missense Mutation | KIF5C     | p.M365K  | kinesin family member       | 94 (0.00)  | 78 (0.12) | 0.38 |
| 11-02 | Gp4 Focus 2 | g.chr2:149835452A>G | Missense Mutation | KIF5C     | p.Q437R  | kinesin family member       | 48 (0.00)  | 19 (0.47) | 1.54 |
| 11-02 | Gp4 Focus 2 | g.chr15:90189250G>A | Missense Mutation | KIF7      | p.T599I  | kinesin family member       | 24 (0.00)  | 22 (0.36) | 0.97 |
| 11-02 | Gp4 Focus 2 | g.chr13:33635129G>A | Nonsense Mutation | KL        | p.W638*  | klotho                      | 26 (0.00)  | 23 (0.35) | 0.93 |
| 11-02 | Gp4 Focus 2 | g.chr13:33635466G>T | Missense Mutation | KL        | p.E750D  | klotho                      | 39 (0.00)  | 24 (0.21) | 0.56 |
| 11-02 | Gp4 Focus 2 | g.chr4:39408614T>C  | Silent            | KLB       | p.I15I   | klotho beta                 | 32 (0.00)  | 41 (0.15) | 0.39 |
| 11-02 | Gp4 Focus 2 | g.chr9:110249416C>T | Missense Mutation | KLF4      | p.R386Q  | Kruppel-like factor 4 (g)   | 34 (0.00)  | 26 (0.62) | 1.64 |
| 11-02 | Gp4 Focus 2 | g.chr14:50241368G>A | Missense Mutation | KLHDC2    | p.G108E  | kelch domain containing     | 67 (0.00)  | 37 (0.35) | 0.94 |
| 11-02 | Gp4 Focus 2 | g.chr3:47385356C>G  | Missense Mutation | KLHL18    | p.C550W  | kelch-like family memb      | 40 (0.00)  | 74 (0.18) | 0.47 |
| 11-02 | Gp4 Focus 2 | g.chr19:51381702G>A | Missense Mutation | KLK2      | p.G225S  | kallikrein-related peptid   | 42 (0.00)  | 32 (0.16) | 0.42 |
| 11-02 | Gp4 Focus 2 | g.chr19:51412582C>T | Missense Mutation | KLK4      | p.M50I   | kallikrein-related peptid   | 15 (0.00)  | 16 (0.56) | 1.50 |
| 11-02 | Gp4 Focus 2 | g.chr12:10530822G>A | Silent            | KLRK1     | p.L148L  | killer cell lectin-like rec | 20 (0.00)  | 29 (0.41) | 1.10 |
| 11-02 | Gp4 Focus 2 | g.chr19:36211330C>T | Silent            | KMT2B     | p.L361L  | lysine (K)-specific meth    | 29 (0.00)  | 40 (0.17) | 0.47 |
| 11-02 | Gp4 Focus 2 | g.chr7:151845774G>A | Missense Mutation | KMT2C     | p.T4413I | lysine (K)-specific meth    | 27 (0.00)  | 19 (0.26) | 0.70 |
| 11-02 | Gp4 Focus 2 | g.chr7:151845776C>A | Missense Mutation | KMT2C     | p.L4412F | lysine (K)-specific meth    | 27 (0.00)  | 19 (0.26) | 0.70 |
| 11-02 | Gp4 Focus 2 | g.chr12:49421053G>A | Missense Mutation | KMT2D     | p.S4899F | lysine (K)-specific meth    | 31 (0.00)  | 49 (0.16) | 0.44 |
| 11-02 | Gp4 Focus 2 | g.chr12:49422670C>T | Missense Mutation | KMT2D     | p.E4775K | lysine (K)-specific meth    | 109 (0.00) | 96 (0.16) | 0.42 |
| 11-02 | Gp4 Focus 2 | g.chr12:49424498G>A | Silent            | KMT2D     | p.L4575L | lysine (K)-specific meth    | 25 (0.00)  | 37 (0.27) | 0.72 |

|       |             |                      |                   |            |          |                           |            |           |      |
|-------|-------------|----------------------|-------------------|------------|----------|---------------------------|------------|-----------|------|
| 11-02 | Gp4 Focus 2 | g.chr12:49432321G>A  | Missense Mutation | KMT2D      | p.P2940S | lysine (K)-specific meth  | 34 (0.00)  | 49 (0.33) | 0.87 |
| 11-02 | Gp4 Focus 2 | g.chr16:19722715C>A  | Missense Mutation | KNOP1      | p.M322I  | lysine-rich nucleolar prc | 29 (0.00)  | 19 (0.26) | 0.70 |
| 11-02 | Gp4 Focus 2 | g.chr15:40679376G>A  | Missense Mutation | KNSTRN     | p.D152N  | kinetochore-localized as  | 38 (0.00)  | 24 (0.25) | 0.67 |
| 11-02 | Gp4 Focus 2 | g.chr13:50296181G>A  | Silent            | KPNA3      | p.I212I  | karyopherin alpha 3 (im   | 23 (0.00)  | 15 (0.87) | 2.31 |
| 11-02 | Gp4 Focus 2 | g.chr7:98779571G>A   | Silent            | KPNA7      | p.L418L  | karyopherin alpha 7 (im   | 33 (0.00)  | 35 (0.23) | 0.61 |
| 11-02 | Gp4 Focus 2 | g.chr17:45755536C>T  | Missense Mutation | KPNB1      | p.S598F  | karyopherin (importin) l  | 91 (0.00)  | 49 (0.16) | 0.44 |
| 11-02 | Gp4 Focus 2 | g.chr1:152732615A>T  | Missense Mutation | KPRP       | p.Y184F  | keratinocyte proline-ricl | 39 (0.00)  | 32 (0.16) | 0.42 |
| 11-02 | Gp4 Focus 2 | g.chr17:39659350C>T  | Splice Site       | KRT13      | p.E246K  | keratin 13                | 42 (0.00)  | 27 (0.41) | 1.09 |
| 11-02 | Gp4 Focus 2 | g.chr17:39767334C>T  | Nonsense Mutation | KRT16      | p.W307*  | keratin 16                | 23 (0.00)  | 37 (0.62) | 1.66 |
| 11-02 | Gp4 Focus 2 | g.chr17:39680100G>A  | Silent            | KRT19      | p.L366L  | keratin 19                | 17 (0.00)  | 23 (0.22) | 0.58 |
| 11-02 | Gp4 Focus 2 | g.chr17:38859623C>T  | Missense Mutation | KRT24      | p.S108N  | keratin 24                | 151 (0.00) | 96 (0.19) | 0.50 |
| 11-02 | Gp4 Focus 2 | g.chr17:38911208C>T  | Missense Mutation | KRT25      | p.D106N  | keratin 25                | 45 (0.00)  | 30 (0.47) | 1.24 |
| 11-02 | Gp4 Focus 2 | g.chr17:39553609C>T  | Silent            | KRT31      | p.Q61Q   | keratin 31                | 21 (0.00)  | 69 (0.19) | 0.50 |
| 11-02 | Gp4 Focus 2 | g.chr17:39521090C>T  | Silent            | KRT33B     | p.R346R  | keratin 33B               | 42 (0.00)  | 26 (0.31) | 0.82 |
| 11-02 | Gp4 Focus 2 | g.chr12:52881732C>T  | Silent            | KRT6A      | p.V489V  | keratin 6A                | 30 (0.00)  | 19 (0.32) | 0.84 |
| 11-02 | Gp4 Focus 2 | g.chr21:46057760C>T  | Silent            | KRTAP10-10 | p.C142C  | keratin associated protei | 18 (0.00)  | 26 (0.31) | 0.82 |
| 11-02 | Gp4 Focus 2 | g.chr21:46057771G>T  | Missense Mutation | KRTAP10-10 | p.C146F  | keratin associated protei | 20 (0.00)  | 25 (0.28) | 0.75 |
| 11-02 | Gp4 Focus 2 | g.chr21:31869323C>T  | Missense Mutation | KRTAP19-4  | p.G36S   | keratin associated protei | 42 (0.00)  | 23 (0.30) | 0.81 |
| 11-02 | Gp4 Focus 2 | g.chr21:31933526C>T  | Missense Mutation | KRTAP19-7  | p.G28E   | keratin associated protei | 55 (0.00)  | 54 (0.30) | 0.79 |
| 11-02 | Gp4 Focus 2 | g.chr17:39389229G>A  | Missense Mutation | KRTAP9-3   | p.C159Y  | keratin associated protei | 45 (0.00)  | 46 (0.17) | 0.46 |
| 11-02 | Gp4 Focus 2 | g.chr17:39394416G>A  | Missense Mutation | KRTAP9-8   | p.C38Y   | keratin associated protei | 17 (0.00)  | 34 (0.26) | 0.71 |
| 11-02 | Gp4 Focus 2 | g.chr3:134322831G>A  | Nonsense Mutation | KY         | p.Q526*  | kyphoscoliosis peptidas   | 62 (0.00)  | 17 (0.29) | 0.78 |
| 11-02 | Gp4 Focus 2 | g.chr1:23286520C>T   | Missense Mutation | LACTBL1    | p.D78N   | lactamase, beta-like 1    | 21 (0.00)  | 23 (0.43) | 1.16 |
| 11-02 | Gp4 Focus 2 | g.chr1:201355710G>A  | Missense Mutation | LAD1       | p.A260V  | ladinin 1                 | 19 (0.00)  | 25 (0.36) | 0.96 |
| 11-02 | Gp4 Focus 2 | g.chr18:6982540G>C   | Missense Mutation | LAMA1      | p.S1949C | laminin, alpha 1          | 68 (0.00)  | 44 (0.23) | 0.61 |
| 11-02 | Gp4 Focus 2 | g.chr18:21437823C>A  | Silent            | LAMA3      | p.I1384I | laminin, alpha 3          | 35 (0.00)  | 33 (0.30) | 0.81 |
| 11-02 | Gp4 Focus 2 | g.chr7:107746267C>T  | Missense Mutation | LAMB4      | p.G289R  | laminin, beta 4           | 43 (0.00)  | 12 (0.58) | 1.56 |
| 11-02 | Gp4 Focus 2 | g.chr13:113965154C>T | Silent            | LAMP1      | p.Y178Y  | lysosomal-associated m    | 48 (0.00)  | 22 (0.23) | 0.61 |
| 11-02 | Gp4 Focus 2 | g.chr13:113974687C>T | Missense Mutation | LAMP1      | p.P260S  | lysosomal-associated m    | 65 (0.00)  | 52 (0.17) | 0.46 |
| 11-02 | Gp4 Focus 2 | g.chr3:45517960G>A   | Splice Site       | LARS2      | p.V287I  | leucyl-tRNA synthetase    | 99 (0.01)  | 70 (0.14) | 0.38 |
| 11-02 | Gp4 Focus 2 | g.chr3:45537804G>A   | Missense Mutation | LARS2      | p.D521N  | leucyl-tRNA synthetase    | 56 (0.00)  | 33 (0.15) | 0.40 |
| 11-02 | Gp4 Focus 2 | g.chr1:225592172C>T  | Missense Mutation | LBR        | p.G541S  | lamin B receptor          | 49 (0.00)  | 18 (0.28) | 0.74 |
| 11-02 | Gp4 Focus 2 | g.chr1:32740036G>A   | Splice Site       | LCK        |          | LCK proto-oncogene, S:    | 22 (0.00)  | 15 (0.40) | 1.07 |
| 11-02 | Gp4 Focus 2 | g.chr16:25176030C>G  | Missense Mutation | LCMT1      | p.N227K  | leucine carboxyl methyl   | 91 (0.00)  | 31 (0.19) | 0.52 |
| 11-02 | Gp4 Focus 2 | g.chr13:46733010G>A  | Missense Mutation | LCPI       | p.T60I   | lymphocyte cytosolic pr   | 130 (0.00) | 30 (0.20) | 0.53 |

|       |             |                     |                   |           |          |                           |            |           |      |
|-------|-------------|---------------------|-------------------|-----------|----------|---------------------------|------------|-----------|------|
| 11-02 | Gp4 Focus 2 | g.chr13:46733114G>A | Silent            | LCP1      | p.G25G   | lymphocyte cytosolic pr   | 97 (0.00)  | 31 (0.19) | 0.52 |
| 11-02 | Gp4 Focus 2 | g.chr15:66850067G>A | Silent            | LCTL      | p.D305D  | lactase-like              | 25 (0.00)  | 25 (0.36) | 0.96 |
| 11-02 | Gp4 Focus 2 | g.chr4:16900041G>A  | Missense Mutation | LDB2      | p.P23L   | LIM domain binding 2      | 31 (0.00)  | 19 (0.74) | 1.96 |
| 11-02 | Gp4 Focus 2 | g.chr19:54969692G>T | Missense Mutation | LENG8     | p.M744I  | leukocyte receptor clust  | 24 (0.00)  | 33 (0.24) | 0.65 |
| 11-02 | Gp4 Focus 2 | g.chr7:127892090T>C | Missense Mutation | LEP       | p.C7R    | leptin                    | 31 (0.00)  | 32 (0.19) | 0.50 |
| 11-02 | Gp4 Focus 2 | g.chr3:189690731G>A | Missense Mutation | LEPREL1   | p.S544F  | leprecan-like 1           | 22 (0.00)  | 25 (0.44) | 1.17 |
| 11-02 | Gp4 Focus 2 | g.chr19:39292965G>A | Missense Mutation | LGALS4    | p.T217I  | lectin, galactoside-bindi | 32 (0.00)  | 16 (0.81) | 2.17 |
| 11-02 | Gp4 Focus 2 | g.chrX:111914548G>A | Missense Mutation | LHFPL1    | p.S24F   | lipoma HMGIC fusion p     | 23 (0.00)  | 51 (0.92) | 2.05 |
| 11-02 | Gp4 Focus 2 | g.chr1:197896870A>G | Missense Mutation | LHX9      | p.K295E  | LIM homeobox 9            | 57 (0.00)  | 42 (0.14) | 0.38 |
| 11-02 | Gp4 Focus 2 | g.chr5:38482170G>A  | Missense Mutation | LIFR      | p.P941S  | leukemia inhibitory fact  | 79 (0.00)  | 16 (0.44) | 1.17 |
| 11-02 | Gp4 Focus 2 | g.chr17:33313065G>A | Silent            | LIG3      | p.L202L  | ligase III, DNA, ATP-d    | 43 (0.00)  | 44 (0.20) | 0.55 |
| 11-02 | Gp4 Focus 2 | g.chr19:54782294C>T | Missense Mutation | LILRB2    | p.G360R  | leukocyte immunoglobul    | 16 (0.00)  | 30 (0.30) | 0.80 |
| 11-02 | Gp4 Focus 2 | g.chr12:50575707G>A | Silent            | LIMA1     | p.S419S  | LIM domain and actin b    | 27 (0.00)  | 28 (0.18) | 0.48 |
| 11-02 | Gp4 Focus 2 | g.chr22:31674305G>A | Missense Mutation | LIMK2     | p.D599N  | LIM domain kinase 2       | 54 (0.02)  | 31 (0.42) | 1.12 |
| 11-02 | Gp4 Focus 2 | g.chr19:52208410C>T | RNA               | LINC00085 |          |                           | 52 (0.00)  | 21 (0.24) | 0.63 |
| 11-02 | Gp4 Focus 2 | g.chr21:30566586G>A | RNA               | LINC00189 |          | long intergenic non-prot  | 45 (0.00)  | 14 (0.43) | 1.14 |
| 11-02 | Gp4 Focus 2 | g.chr21:30660364G>T | RNA               | LINC00189 |          | long intergenic non-prot  | 35 (0.00)  | 42 (0.21) | 0.57 |
| 11-02 | Gp4 Focus 2 | g.chr14:94468149G>A | RNA               | LINC00521 |          | long intergenic non-prot  | 23 (0.00)  | 25 (0.60) | 1.60 |
| 11-02 | Gp4 Focus 2 | g.chr20:11791057G>A | lincRNA           | LINC00687 |          | long intergenic non-prot  | 31 (0.00)  | 67 (0.18) | 0.48 |
| 11-02 | Gp4 Focus 2 | g.chr6:40312272C>T  | lincRNA           | LINC00951 |          | long intergenic non-prot  | 19 (0.00)  | 15 (0.33) | 0.89 |
| 11-02 | Gp4 Focus 2 | g.chr1:151773636G>A | Silent            | LINGO4    | p.N515N  | leucine rich repeat and I | 19 (0.00)  | 25 (0.40) | 1.07 |
| 11-02 | Gp4 Focus 2 | g.chr10:90438215A>C | Missense Mutation | LIPF      | p.Y325S  | lipase, gastric           | 33 (0.00)  | 18 (0.94) | 2.52 |
| 11-02 | Gp4 Focus 2 | g.chr2:97399309C>T  | Missense Mutation | LMAN2L    | p.V152M  | lectin, mannose-binding   | 42 (0.00)  | 21 (0.33) | 0.89 |
| 11-02 | Gp4 Focus 2 | g.chr13:76393601G>T | Nonsense Mutation | LMO7      | p.E480*  | LIM domain 7              | 34 (0.00)  | 24 (0.33) | 0.89 |
| 11-02 | Gp4 Focus 2 | g.chr13:76430677C>T | Missense Mutation | LMO7      | p.P1333L | LIM domain 7              | 65 (0.00)  | 48 (0.21) | 0.56 |
| 11-02 | Gp4 Focus 2 | g.chr3:69168118C>T  | Missense Mutation | LMOD3     | p.S463N  | leiomodoin 3 (fetal)      | 108 (0.01) | 50 (0.18) | 0.48 |
| 11-02 | Gp4 Focus 2 | g.chr7:97820173C>T  | Missense Mutation | LMTK2     | p.P378S  | lemur tyrosine kinase 2   | 32 (0.00)  | 25 (0.56) | 1.49 |
| 11-02 | Gp4 Focus 2 | g.chr19:49012157C>T | Missense Mutation | LMTK3     | p.A170T  | lemur tyrosine kinase 3   | 25 (0.00)  | 17 (0.35) | 0.94 |
| 11-02 | Gp4 Focus 2 | g.chr3:100148576G>A | Start Codon SNP   | LNP1      | p.M1I    | leukemia NUP98 fusion     | 69 (0.00)  | 17 (0.53) | 1.03 |
| 11-02 | Gp4 Focus 2 | g.chr13:28136659C>T | Missense Mutation | LNK2      | p.G372E  | ligand of numb-protein    | 64 (0.00)  | 64 (0.22) | 0.58 |
| 11-02 | Gp4 Focus 2 | g.chr2:74762776G>C  | Missense Mutation | LOXL3     | p.T452S  | lysyl oxidase-like 3      | 16 (0.00)  | 38 (0.16) | 0.42 |
| 11-02 | Gp4 Focus 2 | g.chr3:188202472G>A | Missense Mutation | LPP       | p.E96K   | LIM domain containing     | 153 (0.00) | 31 (0.19) | 0.52 |
| 11-02 | Gp4 Focus 2 | g.chr4:151520192G>A | Missense Mutation | LRBA      | p.P2005S | LPS-responsive vesicle    | 60 (0.00)  | 31 (0.16) | 0.43 |
| 11-02 | Gp4 Focus 2 | g.chr3:197574745G>A | Silent            | LRCH3     | p.L461L  | leucine-rich repeats and  | 19 (0.00)  | 17 (0.29) | 0.78 |
| 11-02 | Gp4 Focus 2 | g.chr3:66434656G>A  | Silent            | LRIG1     | p.I610I  | leucine-rich repeats and  | 34 (0.00)  | 82 (0.30) | 0.81 |

|       |             |                      |                   |            |          |                                     |           |      |
|-------|-------------|----------------------|-------------------|------------|----------|-------------------------------------|-----------|------|
| 11-02 | Gp4 Focus 2 | g.chr3:66460632G>A   | Missense Mutation | LRIG1      | p.H286Y  | leucine-rich repeats and 34 (0.00)  | 62 (0.40) | 1.08 |
| 11-02 | Gp4 Focus 2 | g.chr2:141027856C>T  | Missense Mutation | LRP1B      | p.G4401D | low density lipoprotein 133 (0.00)  | 46 (0.20) | 0.64 |
| 11-02 | Gp4 Focus 2 | g.chr2:141201997C>T  | Missense Mutation | LRP1B      | p.G3399D | low density lipoprotein 159 (0.00)  | 25 (0.20) | 0.65 |
| 11-02 | Gp4 Focus 2 | g.chr2:170059440G>A  | Missense Mutation | LRP2       | p.H2679Y | low density lipoprotein 121 (0.00)  | 89 (0.72) | 1.92 |
| 11-02 | Gp4 Focus 2 | g.chr11:46900739G>A  | Missense Mutation | LRP4       | p.T981I  | low density lipoprotein 121 (0.00)  | 21 (0.38) | 1.02 |
| 11-02 | Gp4 Focus 2 | g.chr6:53706994G>A   | Missense Mutation | LRRC1      | p.M82I   | leucine rich repeat conta44 (0.00)  | 56 (0.20) | 0.52 |
| 11-02 | Gp4 Focus 2 | g.chr7:102574454C>T  | Missense Mutation | LRRC17     | p.H32Y   | leucine rich repeat conta15 (0.00)  | 31 (0.16) | 0.43 |
| 11-02 | Gp4 Focus 2 | g.chr10:134161860G>A | Splice Site       | LRRC27     | p.R309K  | leucine rich repeat conta51 (0.00)  | 27 (0.19) | 0.49 |
| 11-02 | Gp4 Focus 2 | g.chr18:7231442C>T   | Silent            | LRRC30     | p.C102C  | leucine rich repeat conta21 (0.00)  | 34 (0.15) | 0.39 |
| 11-02 | Gp4 Focus 2 | g.chr17:44626869C>A  | Missense Mutation | LRRC37A2   | p.S1455Y | leucine rich repeat conta100 (0.00) | 29 (0.31) | 0.83 |
| 11-02 | Gp4 Focus 2 | g.chr17:62855678C>T  | Missense Mutation | LRRC37A3   | p.S1529N | leucine rich repeat conta55 (0.00)  | 55 (0.22) | 0.58 |
| 11-02 | Gp4 Focus 2 | g.chr17:62856953C>T  | Missense Mutation | LRRC37A3   | p.G1104E | leucine rich repeat conta93 (0.00)  | 55 (0.58) | 1.55 |
| 11-02 | Gp4 Focus 2 | g.chr7:127670635G>A  | Missense Mutation | LRRC4      | p.P20L   | leucine rich repeat conta16 (0.00)  | 55 (0.22) | 0.58 |
| 11-02 | Gp4 Focus 2 | g.chr17:45912754C>T  | Silent            | LRRC46     | p.I87I   | leucine rich repeat conta24 (0.00)  | 17 (0.47) | 1.25 |
| 11-02 | Gp4 Focus 2 | g.chr11:40137133C>T  | Missense Mutation | LRRC4C     | p.G237D  | leucine rich repeat conta49 (0.00)  | 23 (0.26) | 1.41 |
| 11-02 | Gp4 Focus 2 | g.chr1:165532981G>A  | Missense Mutation | LRRC52     | p.A288T  | leucine rich repeat conta25 (0.00)  | 26 (0.35) | 0.92 |
| 11-02 | Gp4 Focus 2 | g.chr15:42839586G>A  | Missense Mutation | LRRC57     | p.A122V  | leucine rich repeat conta28 (0.00)  | 23 (0.22) | 0.58 |
| 11-02 | Gp4 Focus 2 | g.chr17:48460581G>A  | Missense Mutation | LRRC59     | p.S231F  | leucine rich repeat conta15 (0.00)  | 35 (0.17) | 0.46 |
| 11-02 | Gp4 Focus 2 | g.chr1:156902274G>T  | Missense Mutation | LRRC71     | p.M500I  | leucine rich repeat conta19 (0.00)  | 29 (0.31) | 0.83 |
| 11-02 | Gp4 Focus 2 | g.chr7:16572163C>T   | Missense Mutation | LRRC72     | p.A45V   | leucine rich repeat conta38 (0.00)  | 12 (0.75) | 2.68 |
| 11-02 | Gp4 Focus 2 | g.chr1:90178389C>T   | Missense Mutation | LRRC8C     | p.S87F   | leucine rich repeat conta32 (0.00)  | 15 (0.47) | 1.24 |
| 11-02 | Gp4 Focus 2 | g.chr19:7965691G>A   | Missense Mutation | LRRC8E     | p.E762K  | leucine rich repeat conta29 (0.00)  | 37 (0.19) | 0.50 |
| 11-02 | Gp4 Focus 2 | g.chr3:169540724G>A  | Missense Mutation | LRRIQ4     | p.G339R  | leucine-rich repeats and 30 (0.00)  | 20 (0.45) | 1.20 |
| 11-02 | Gp4 Focus 2 | g.chr12:40626184C>T  | Splice Site       | LRRK2      | p.Q116*  | leucine-rich repeat kinase21 (0.00) | 12 (0.42) | 1.11 |
| 11-02 | Gp4 Focus 2 | g.chr12:40734095G>A  | Splice Site       | LRRK2      |          | leucine-rich repeat kinase55 (0.00) | 42 (0.60) | 1.59 |
| 11-02 | Gp4 Focus 2 | g.chr12:40734253C>T  | Missense Mutation | LRRK2      | p.P2036S | leucine-rich repeat kinase23 (0.00) | 44 (0.16) | 0.42 |
| 11-02 | Gp4 Focus 2 | g.chr3:194373563C>T  | Silent            | LSG1       | p.Q356Q  | large 60S subunit nucleol64 (0.00)  | 56 (0.14) | 0.38 |
| 11-02 | Gp4 Focus 2 | g.chr3:46480885C>T   | Missense Mutation | LTF        | p.E602K  | lactotransferrin 29 (0.00)          | 22 (0.23) | 0.61 |
| 11-02 | Gp4 Focus 2 | g.chr3:46485031C>A   | Missense Mutation | LTF        | p.R517I  | lactotransferrin 49 (0.00)          | 65 (0.22) | 0.57 |
| 11-02 | Gp4 Focus 2 | g.chr2:160755227C>T  | Silent            | LY75-CD302 | p.E146E  | LY75-CD302 readthrou39 (0.00)       | 18 (0.28) | 0.74 |
| 11-02 | Gp4 Focus 2 | g.chr4:4276142C>T    | Missense Mutation | LYAR       | p.E262K  | Lyl1 antibody reactive 59 (0.00)    | 40 (0.25) | 0.67 |
| 11-02 | Gp4 Focus 2 | g.chr19:42342237C>T  | Missense Mutation | LYPD4      | p.A104T  | LY6/PLAUR domain cc28 (0.00)        | 11 (0.55) | 1.45 |
| 11-02 | Gp4 Focus 2 | g.chr1:235878550G>A  | Silent            | LYST       | p.H3245H | lysosomal trafficking re36 (0.00)   | 15 (0.67) | 1.78 |
| 11-02 | Gp4 Focus 2 | g.chr3:45869964G>A   | Silent            | LZTFL1     | p.L248L  | leucine zipper transcript27 (0.00)  | 19 (0.37) | 0.98 |
| 11-02 | Gp4 Focus 2 | g.chr10:102763496C>T | Missense Mutation | LZTS2      | p.S214L  | leucine zipper, putative 25 (0.00)  | 50 (0.18) | 0.48 |

|       |             |                     |                   |        |          |                          |            |           |      |
|-------|-------------|---------------------|-------------------|--------|----------|--------------------------|------------|-----------|------|
| 11-02 | Gp4 Focus 2 | g.chr1:39781189C>T  | Missense Mutation | MACF1  | p.T1097I | microtubule-actin crossl | 50 (0.00)  | 28 (0.18) | 0.48 |
| 11-02 | Gp4 Focus 2 | g.chr1:39853929G>A  | Missense Mutation | MACF1  | p.D5144N | microtubule-actin crossl | 20 (0.00)  | 22 (0.23) | 0.61 |
| 11-02 | Gp4 Focus 2 | g.chr11:47297476G>A | Missense Mutation | MADD   | p.G229E  | MAP-kinase activating c  | 78 (0.01)  | 25 (0.20) | 0.53 |
| 11-02 | Gp4 Focus 2 | g.chr11:47331155C>T | Silent            | MADD   | p.L1384L | MAP-kinase activating c  | 58 (0.00)  | 28 (0.21) | 0.57 |
| 11-02 | Gp4 Focus 2 | g.chrX:55479329G>A  | Silent            | MAGEH1 | p.L174L  | melanoma antigen famil   | 38 (0.00)  | 96 (0.81) | 1.35 |
| 11-02 | Gp4 Focus 2 | g.chr7:77659387C>T  | Intron            | MAGI2  |          | membrane associated gu   | 39 (0.00)  | 19 (0.26) | 0.70 |
| 11-02 | Gp4 Focus 2 | g.chr7:77662239G>A  | Intron            | MAGI2  |          | membrane associated gu   | 63 (0.00)  | 33 (0.33) | 0.89 |
| 11-02 | Gp4 Focus 2 | g.chr7:77664732G>A  | Intron            | MAGI2  |          | membrane associated gu   | 32 (0.00)  | 26 (0.31) | 0.82 |
| 11-02 | Gp4 Focus 2 | g.chr7:77679926C>T  | Intron            | MAGI2  |          | membrane associated gu   | 69 (0.00)  | 49 (0.18) | 0.49 |
| 11-02 | Gp4 Focus 2 | g.chr7:77710148C>T  | Intron            | MAGI2  |          | membrane associated gu   | 122 (0.01) | 47 (0.26) | 0.68 |
| 11-02 | Gp4 Focus 2 | g.chr7:77711151G>A  | Intron            | MAGI2  |          | membrane associated gu   | 125 (0.00) | 29 (0.45) | 1.20 |
| 11-02 | Gp4 Focus 2 | g.chr7:77740080C>A  | Intron            | MAGI2  |          | membrane associated gu   | 81 (0.00)  | 14 (0.36) | 0.95 |
| 11-02 | Gp4 Focus 2 | g.chr7:77756618G>A  | Nonsense Mutation | MAGI2  | p.Q1107* | membrane associated gu   | 50 (0.00)  | 57 (0.30) | 0.80 |
| 11-02 | Gp4 Focus 2 | g.chr7:77756634G>A  | Silent            | MAGI2  | p.P1101P | membrane associated gu   | 51 (0.00)  | 50 (0.34) | 0.91 |
| 11-02 | Gp4 Focus 2 | g.chr7:77759752G>A  | Intron            | MAGI2  |          | membrane associated gu   | 58 (0.00)  | 22 (0.27) | 0.73 |
| 11-02 | Gp4 Focus 2 | g.chr7:77761191C>T  | Intron            | MAGI2  |          | membrane associated gu   | 35 (0.00)  | 28 (0.36) | 0.95 |
| 11-02 | Gp4 Focus 2 | g.chr7:77761797C>T  | Intron            | MAGI2  |          | membrane associated gu   | 49 (0.00)  | 12 (0.42) | 1.11 |
| 11-02 | Gp4 Focus 2 | g.chr7:77762233G>A  | Missense Mutation | MAGI2  | p.P1059L | membrane associated gu   | 49 (0.00)  | 33 (0.21) | 0.57 |
| 11-02 | Gp4 Focus 2 | g.chr7:77781778G>A  | Intron            | MAGI2  |          | membrane associated gu   | 28 (0.00)  | 20 (0.25) | 0.67 |
| 11-02 | Gp4 Focus 2 | g.chr7:77810868A>G  | Intron            | MAGI2  |          | membrane associated gu   | 37 (0.00)  | 26 (0.42) | 1.13 |
| 11-02 | Gp4 Focus 2 | g.chr7:77818261C>T  | Intron            | MAGI2  |          | membrane associated gu   | 77 (0.00)  | 39 (0.15) | 0.41 |
| 11-02 | Gp4 Focus 2 | g.chr7:77826891G>A  | Intron            | MAGI2  |          | membrane associated gu   | 21 (0.00)  | 31 (0.39) | 1.03 |
| 11-02 | Gp4 Focus 2 | g.chr7:77862459G>A  | Intron            | MAGI2  |          | membrane associated gu   | 30 (0.00)  | 57 (0.47) | 1.26 |
| 11-02 | Gp4 Focus 2 | g.chr7:77931358G>T  | Intron            | MAGI2  |          | membrane associated gu   | 36 (0.00)  | 19 (0.32) | 0.84 |
| 11-02 | Gp4 Focus 2 | g.chr7:77936921G>A  | Intron            | MAGI2  |          | membrane associated gu   | 167 (0.00) | 23 (0.30) | 0.81 |
| 11-02 | Gp4 Focus 2 | g.chr7:77983515G>A  | Intron            | MAGI2  |          | membrane associated gu   | 89 (0.00)  | 34 (0.18) | 0.47 |
| 11-02 | Gp4 Focus 2 | g.chr7:77983529G>A  | Intron            | MAGI2  |          | membrane associated gu   | 65 (0.00)  | 34 (0.18) | 0.47 |
| 11-02 | Gp4 Focus 2 | g.chr7:77991799G>A  | Intron            | MAGI2  |          | membrane associated gu   | 57 (0.00)  | 68 (0.16) | 0.43 |
| 11-02 | Gp4 Focus 2 | g.chr7:78022566A>G  | Intron            | MAGI2  |          | membrane associated gu   | 64 (0.00)  | 21 (0.38) | 1.02 |
| 11-02 | Gp4 Focus 2 | g.chr7:78041978C>T  | Intron            | MAGI2  |          | membrane associated gu   | 176 (0.00) | 25 (0.24) | 0.64 |
| 11-02 | Gp4 Focus 2 | g.chr7:78057979C>T  | Intron            | MAGI2  |          | membrane associated gu   | 91 (0.00)  | 44 (0.20) | 0.55 |
| 11-02 | Gp4 Focus 2 | g.chr7:78057985C>T  | Intron            | MAGI2  |          | membrane associated gu   | 92 (0.00)  | 43 (0.19) | 0.50 |
| 11-02 | Gp4 Focus 2 | g.chr7:78060448G>A  | Intron            | MAGI2  |          | membrane associated gu   | 56 (0.00)  | 15 (0.40) | 1.07 |
| 11-02 | Gp4 Focus 2 | g.chr7:78064456G>A  | Intron            | MAGI2  |          | membrane associated gu   | 48 (0.00)  | 43 (0.16) | 0.43 |
| 11-02 | Gp4 Focus 2 | g.chr7:78096014G>A  | Intron            | MAGI2  |          | membrane associated gu   | 56 (0.00)  | 37 (0.22) | 0.58 |



|       |             |                    |        |       |                     |               |           |      |
|-------|-------------|--------------------|--------|-------|---------------------|---------------|-----------|------|
| 11-02 | Gp4 Focus 2 | g.chr7:78096736G>A | Intron | MAGI2 | membrane associated | gu 90 (0.00)  | 16 (0.31) | 0.83 |
| 11-02 | Gp4 Focus 2 | g.chr7:78165839G>A | Intron | MAGI2 | membrane associated | gu 63 (0.00)  | 38 (0.18) | 0.49 |
| 11-02 | Gp4 Focus 2 | g.chr7:78170942G>A | Intron | MAGI2 | membrane associated | gu 38 (0.00)  | 18 (0.67) | 1.78 |
| 11-02 | Gp4 Focus 2 | g.chr7:78172029G>A | Intron | MAGI2 | membrane associated | gu 40 (0.00)  | 37 (0.89) | 2.38 |
| 11-02 | Gp4 Focus 2 | g.chr7:78179294G>A | Intron | MAGI2 | membrane associated | gu 22 (0.00)  | 32 (0.34) | 0.92 |
| 11-02 | Gp4 Focus 2 | g.chr7:78183857C>A | Intron | MAGI2 | membrane associated | gu 118 (0.00) | 18 (0.28) | 0.74 |
| 11-02 | Gp4 Focus 2 | g.chr7:78190525G>A | Intron | MAGI2 | membrane associated | gu 100 (0.00) | 60 (0.20) | 0.53 |
| 11-02 | Gp4 Focus 2 | g.chr7:78191087G>C | Intron | MAGI2 | membrane associated | gu 62 (0.00)  | 60 (0.40) | 1.07 |
| 11-02 | Gp4 Focus 2 | g.chr7:78191151G>A | Intron | MAGI2 | membrane associated | gu 94 (0.00)  | 82 (0.29) | 0.78 |
| 11-02 | Gp4 Focus 2 | g.chr7:78191194G>A | Intron | MAGI2 | membrane associated | gu 95 (0.00)  | 59 (0.17) | 0.45 |
| 11-02 | Gp4 Focus 2 | g.chr7:78198185G>A | Intron | MAGI2 | membrane associated | gu 50 (0.00)  | 22 (0.32) | 0.85 |
| 11-02 | Gp4 Focus 2 | g.chr7:78225218C>T | Intron | MAGI2 | membrane associated | gu 21 (0.00)  | 16 (0.62) | 1.67 |
| 11-02 | Gp4 Focus 2 | g.chr7:78233604G>A | Intron | MAGI2 | membrane associated | gu 45 (0.02)  | 33 (0.36) | 0.97 |
| 11-02 | Gp4 Focus 2 | g.chr7:78244351C>A | Intron | MAGI2 | membrane associated | gu 24 (0.00)  | 18 (0.67) | 1.78 |
| 11-02 | Gp4 Focus 2 | g.chr7:78248209G>A | Intron | MAGI2 | membrane associated | gu 88 (0.00)  | 19 (0.32) | 0.84 |
| 11-02 | Gp4 Focus 2 | g.chr7:78251676C>T | Intron | MAGI2 | membrane associated | gu 24 (0.00)  | 14 (0.50) | 1.33 |
| 11-02 | Gp4 Focus 2 | g.chr7:78258688C>T | Intron | MAGI2 | membrane associated | gu 85 (0.00)  | 10 (0.50) | 1.33 |
| 11-02 | Gp4 Focus 2 | g.chr7:78288927T>A | Intron | MAGI2 | membrane associated | gu 57 (0.00)  | 22 (0.68) | 1.82 |
| 11-02 | Gp4 Focus 2 | g.chr7:78300850G>A | Intron | MAGI2 | membrane associated | gu 47 (0.00)  | 12 (0.42) | 1.11 |
| 11-02 | Gp4 Focus 2 | g.chr7:78353749G>A | Intron | MAGI2 | membrane associated | gu 92 (0.01)  | 35 (0.14) | 0.38 |
| 11-02 | Gp4 Focus 2 | g.chr7:78368809C>T | Intron | MAGI2 | membrane associated | gu 37 (0.00)  | 13 (0.46) | 1.23 |
| 11-02 | Gp4 Focus 2 | g.chr7:78381185C>T | Intron | MAGI2 | membrane associated | gu 38 (0.00)  | 21 (0.67) | 1.78 |
| 11-02 | Gp4 Focus 2 | g.chr7:78381309C>A | Intron | MAGI2 | membrane associated | gu 22 (0.00)  | 12 (0.75) | 2.00 |
| 11-02 | Gp4 Focus 2 | g.chr7:78391100G>T | Intron | MAGI2 | membrane associated | gu 94 (0.00)  | 26 (0.19) | 0.51 |
| 11-02 | Gp4 Focus 2 | g.chr7:78392084C>T | Intron | MAGI2 | membrane associated | gu 51 (0.00)  | 17 (0.41) | 1.10 |
| 11-02 | Gp4 Focus 2 | g.chr7:78411598G>A | Intron | MAGI2 | membrane associated | gu 35 (0.03)  | 25 (0.44) | 1.17 |
| 11-02 | Gp4 Focus 2 | g.chr7:78422433C>T | Intron | MAGI2 | membrane associated | gu 41 (0.00)  | 18 (0.33) | 0.89 |
| 11-02 | Gp4 Focus 2 | g.chr7:78455889G>A | Intron | MAGI2 | membrane associated | gu 66 (0.00)  | 21 (0.33) | 0.89 |
| 11-02 | Gp4 Focus 2 | g.chr7:78478887G>A | Intron | MAGI2 | membrane associated | gu 71 (0.00)  | 29 (0.17) | 0.46 |
| 11-02 | Gp4 Focus 2 | g.chr7:78515265G>A | Intron | MAGI2 | membrane associated | gu 27 (0.00)  | 17 (0.35) | 0.94 |
| 11-02 | Gp4 Focus 2 | g.chr7:78532146G>A | Intron | MAGI2 | membrane associated | gu 81 (0.00)  | 42 (0.19) | 0.51 |
| 11-02 | Gp4 Focus 2 | g.chr7:78554449C>T | Intron | MAGI2 | membrane associated | gu 31 (0.00)  | 15 (0.33) | 0.89 |
| 11-02 | Gp4 Focus 2 | g.chr7:78569948G>A | Intron | MAGI2 | membrane associated | gu 72 (0.00)  | 25 (0.20) | 0.53 |
| 11-02 | Gp4 Focus 2 | g.chr7:78582583C>A | Intron | MAGI2 | membrane associated | gu 92 (0.01)  | 23 (0.39) | 1.04 |
| 11-02 | Gp4 Focus 2 | g.chr7:78609785C>A | Intron | MAGI2 | membrane associated | gu 35 (0.00)  | 25 (0.36) | 0.96 |

|       |             |                     |                   |       |          |                          |               |            |      |
|-------|-------------|---------------------|-------------------|-------|----------|--------------------------|---------------|------------|------|
| 11-02 | Gp4 Focus 2 | g.chr7:78636452C>T  | Silent            | MAGI2 | p.E124E  | membrane associated      | gu 61 (0.00)  | 26 (0.54)  | 1.44 |
| 11-02 | Gp4 Focus 2 | g.chr7:78647924G>A  | Intron            | MAGI2 |          | membrane associated      | gu 29 (0.00)  | 24 (0.38)  | 1.00 |
| 11-02 | Gp4 Focus 2 | g.chr7:78703070C>T  | Intron            | MAGI2 |          | membrane associated      | gu 75 (0.00)  | 52 (0.19)  | 0.51 |
| 11-02 | Gp4 Focus 2 | g.chr7:78730788T>C  | Intron            | MAGI2 |          | membrane associated      | gu 21 (0.00)  | 32 (0.19)  | 0.50 |
| 11-02 | Gp4 Focus 2 | g.chr7:78739388A>G  | Intron            | MAGI2 |          | membrane associated      | gu 22 (0.00)  | 12 (0.42)  | 1.11 |
| 11-02 | Gp4 Focus 2 | g.chr7:78779305T>A  | Intron            | MAGI2 |          | membrane associated      | gu 51 (0.02)  | 27 (0.33)  | 0.89 |
| 11-02 | Gp4 Focus 2 | g.chr7:78812350G>A  | Intron            | MAGI2 |          | membrane associated      | gu 84 (0.00)  | 54 (0.19)  | 0.49 |
| 11-02 | Gp4 Focus 2 | g.chr7:78814239G>A  | Intron            | MAGI2 |          | membrane associated      | gu 48 (0.00)  | 11 (0.55)  | 1.45 |
| 11-02 | Gp4 Focus 2 | g.chr7:78825299G>A  | Intron            | MAGI2 |          | membrane associated      | gu 51 (0.00)  | 22 (0.36)  | 0.97 |
| 11-02 | Gp4 Focus 2 | g.chr7:78826376T>C  | Intron            | MAGI2 |          | membrane associated      | gu 83 (0.01)  | 31 (0.16)  | 0.43 |
| 11-02 | Gp4 Focus 2 | g.chr7:78872959G>A  | Intron            | MAGI2 |          | membrane associated      | gu 30 (0.00)  | 42 (0.24)  | 0.63 |
| 11-02 | Gp4 Focus 2 | g.chr7:78872961G>A  | Intron            | MAGI2 |          | membrane associated      | gu 30 (0.00)  | 41 (0.49)  | 1.30 |
| 11-02 | Gp4 Focus 2 | g.chr7:78876079C>A  | Intron            | MAGI2 |          | membrane associated      | gu 47 (0.00)  | 33 (0.15)  | 0.40 |
| 11-02 | Gp4 Focus 2 | g.chr7:78881852G>A  | Intron            | MAGI2 |          | membrane associated      | gu 31 (0.00)  | 18 (0.28)  | 0.74 |
| 11-02 | Gp4 Focus 2 | g.chr7:78898170C>T  | Intron            | MAGI2 |          | membrane associated      | gu 112 (0.00) | 31 (0.19)  | 0.52 |
| 11-02 | Gp4 Focus 2 | g.chr7:78908113C>A  | Intron            | MAGI2 |          | membrane associated      | gu 90 (0.00)  | 38 (0.16)  | 0.42 |
| 11-02 | Gp4 Focus 2 | g.chr7:78908137G>A  | Intron            | MAGI2 |          | membrane associated      | gu 77 (0.00)  | 35 (0.20)  | 0.53 |
| 11-02 | Gp4 Focus 2 | g.chr7:78928653G>A  | Intron            | MAGI2 |          | membrane associated      | gu 57 (0.00)  | 83 (0.31)  | 0.84 |
| 11-02 | Gp4 Focus 2 | g.chr7:78928771C>A  | Intron            | MAGI2 |          | membrane associated      | gu 31 (0.00)  | 37 (0.22)  | 0.58 |
| 11-02 | Gp4 Focus 2 | g.chr7:78945206G>A  | Intron            | MAGI2 |          | membrane associated      | gu 55 (0.00)  | 30 (0.20)  | 0.53 |
| 11-02 | Gp4 Focus 2 | g.chr7:78953278G>A  | Intron            | MAGI2 |          | membrane associated      | gu 112 (0.00) | 42 (0.17)  | 0.44 |
| 11-02 | Gp4 Focus 2 | g.chr7:78983205G>A  | Intron            | MAGI2 |          | membrane associated      | gu 16 (0.00)  | 30 (0.57)  | 1.51 |
| 11-02 | Gp4 Focus 2 | g.chr7:78983247G>A  | Intron            | MAGI2 |          | membrane associated      | gu 18 (0.00)  | 37 (0.27)  | 0.72 |
| 11-02 | Gp4 Focus 2 | g.chr7:78986616C>T  | Intron            | MAGI2 |          | membrane associated      | gu 92 (0.00)  | 33 (0.15)  | 0.40 |
| 11-02 | Gp4 Focus 2 | g.chr7:78995328C>T  | Intron            | MAGI2 |          | membrane associated      | gu 42 (0.02)  | 96 (0.17)  | 0.44 |
| 11-02 | Gp4 Focus 2 | g.chr7:79001283G>A  | Intron            | MAGI2 |          | membrane associated      | gu 130 (0.00) | 30 (0.70)  | 1.87 |
| 11-02 | Gp4 Focus 2 | g.chr7:79068696C>T  | Intron            | MAGI2 |          | membrane associated      | gu 88 (0.00)  | 36 (0.28)  | 0.74 |
| 11-02 | Gp4 Focus 2 | g.chr1:114214393G>A | Silent            | MAGI3 | p.R951R  | membrane associated      | gu 48 (0.00)  | 13 (0.54)  | 1.13 |
| 11-02 | Gp4 Focus 2 | g.chr1:114214416G>A | Missense Mutation | MAGI3 | p.R959K  | membrane associated      | gu 50 (0.00)  | 13 (0.38)  | 0.80 |
| 11-02 | Gp4 Focus 2 | g.chr5:179195877G>A | Silent            | MAML1 | p.V586V  | mastermind-like 1 (Dros) | 46 (0.00)     | 100 (0.17) | 0.45 |
| 11-02 | Gp4 Focus 2 | g.chr11:95724708G>A | Silent            | MAML2 | p.L773L  | mastermind-like 2 (Dros) | 45 (0.00)     | 35 (0.20)  | 0.53 |
| 11-02 | Gp4 Focus 2 | g.chr4:140640856G>A | Missense Mutation | MAML3 | p.A1013V | mastermind-like 3 (Dros) | 16 (0.00)     | 26 (0.27)  | 1.23 |
| 11-02 | Gp4 Focus 2 | g.chr4:140641140G>A | Silent            | MAML3 | p.S918S  | mastermind-like 3 (Dros) | 60 (0.00)     | 33 (0.18)  | 0.83 |
| 11-02 | Gp4 Focus 2 | g.chr4:140810539G>A | Missense Mutation | MAML3 | p.A684V  | mastermind-like 3 (Dros) | 75 (0.00)     | 79 (0.30)  | 1.39 |
| 11-02 | Gp4 Focus 2 | g.chr4:140811340G>A | Missense Mutation | MAML3 | p.S417F  | mastermind-like 3 (Dros) | 29 (0.00)     | 42 (0.14)  | 0.65 |

|       |             |                      |                   |          |          |                          |           |           |      |
|-------|-------------|----------------------|-------------------|----------|----------|--------------------------|-----------|-----------|------|
| 11-02 | Gp4 Focus 2 | g.chr4:140811782G>A  | Nonsense Mutation | MAML3    | p.Q270*  | mastermind-like 3 (Dros  | 69 (0.00) | 34 (0.24) | 1.08 |
| 11-02 | Gp4 Focus 2 | g.chr1:26090424C>T   | Silent            | MAN1C1   | p.N369N  | mannosidase, alpha, cla  | 42 (0.00) | 12 (0.42) | 1.11 |
| 11-02 | Gp4 Focus 2 | g.chr19:12760181G>A  | Missense Mutation | MAN2B1   | p.P777S  | mannosidase, alpha, cla  | 17 (0.00) | 69 (0.17) | 0.46 |
| 11-02 | Gp4 Focus 2 | g.chr15:75649155C>T  | Missense Mutation | MAN2C1   | p.G780D  | mannosidase, alpha, cla  | 24 (0.00) | 19 (0.26) | 0.70 |
| 11-02 | Gp4 Focus 2 | g.chr15:43804404C>T  | Silent            | MAP1A    | p.N85N   | microtubule-associated j | 81 (0.00) | 53 (0.15) | 0.40 |
| 11-02 | Gp4 Focus 2 | g.chr5:56152496G>A   | Missense Mutation | MAP3K1   | p.M184I  | mitogen-activated protei | 17 (0.00) | 19 (0.37) | 1.22 |
| 11-02 | Gp4 Focus 2 | g.chr12:53879178C>T  | Missense Mutation | MAP3K12  | p.M301I  | mitogen-activated protei | 30 (0.00) | 22 (0.32) | 0.85 |
| 11-02 | Gp4 Focus 2 | g.chr6:161469746G>A  | Missense Mutation | MAP3K4   | p.A148T  | mitogen-activated protei | 69 (0.00) | 30 (0.53) | 1.42 |
| 11-02 | Gp4 Focus 2 | g.chr6:161469750C>G  | Missense Mutation | MAP3K4   | p.A149G  | mitogen-activated protei | 54 (0.00) | 28 (0.18) | 0.48 |
| 11-02 | Gp4 Focus 2 | g.chr2:39570549G>A   | Missense Mutation | MAP4K3   | p.S97F   | mitogen-activated protei | 18 (0.00) | 37 (0.16) | 0.43 |
| 11-02 | Gp4 Focus 2 | g.chr2:102446053C>T  | Missense Mutation | MAP4K4   | p.L169F  | mitogen-activated protei | 93 (0.00) | 24 (0.33) | 0.89 |
| 11-02 | Gp4 Focus 2 | g.chr2:102482940G>A  | Missense Mutation | MAP4K4   | p.R589K  | mitogen-activated protei | 62 (0.00) | 39 (0.23) | 0.62 |
| 11-02 | Gp4 Focus 2 | g.chr2:102482952G>A  | Missense Mutation | MAP4K4   | p.G593D  | mitogen-activated protei | 67 (0.00) | 38 (0.24) | 0.63 |
| 11-02 | Gp4 Focus 2 | g.chr1:206904984G>A  | Splice Site       | MAPKAPK2 |          | mitogen-activated protei | 39 (0.00) | 22 (0.23) | 0.61 |
| 11-02 | Gp4 Focus 2 | g.chr12:112326794C>T | Silent            | MAPKAPK5 | p.L402L  | mitogen-activated protei | 22 (0.00) | 14 (0.79) | 2.10 |
| 11-02 | Gp4 Focus 2 | g.chr18:32706917G>A  | Missense Mutation | MAPRE2   | p.A163T  | microtubule-associated j | 54 (0.00) | 13 (0.69) | 1.85 |
| 11-02 | Gp4 Focus 2 | g.chr2:27245095C>T   | Silent            | MAPRE3   | p.V3V    | microtubule-associated j | 34 (0.00) | 29 (0.38) | 1.01 |
| 11-02 | Gp4 Focus 2 | g.chr1:220955220G>A  | Missense Mutation | MARC2    | p.D329N  | mitochondrial amidoxin   | 99 (0.01) | 34 (0.18) | 0.47 |
| 11-02 | Gp4 Focus 2 | g.chr5:16067814G>T   | Missense Mutation | MARCH11  | p.D325E  | membrane-associated ri   | 32 (0.00) | 12 (0.50) | 1.33 |
| 11-02 | Gp4 Focus 2 | g.chr11:63667370G>A  | Missense Mutation | MARK2    | p.D153N  | MAP/microtubule affini   | 59 (0.00) | 13 (0.46) | 1.23 |
| 11-02 | Gp4 Focus 2 | g.chr14:103934477G>A | Silent            | MARK3    | p.Q406Q  | MAP/microtubule affini   | 19 (0.00) | 23 (0.22) | 0.58 |
| 11-02 | Gp4 Focus 2 | g.chr2:198570992C>T  | Missense Mutation | MARS2    | p.T288I  | methionyl-tRNA synthe    | 24 (0.00) | 43 (0.16) | 0.43 |
| 11-02 | Gp4 Focus 2 | g.chr1:46488938C>T   | Missense Mutation | MAST2    | p.P507S  | microtubule associated ε | 91 (0.01) | 71 (0.17) | 0.45 |
| 11-02 | Gp4 Focus 2 | g.chr5:66458434G>A   | Splice Site       | MAST4    |          | microtubule associated ε | 69 (0.00) | 19 (0.47) | 1.57 |
| 11-02 | Gp4 Focus 2 | g.chr5:138658535G>A  | Missense Mutation | MATR3    | p.G676E  | matrin 3                 | 60 (0.00) | 60 (0.15) | 0.40 |
| 11-02 | Gp4 Focus 2 | g.chr14:65543362C>A  | Silent            | MAX      | p.A105A  | MYC associated factor    | 34 (0.00) | 45 (0.20) | 0.53 |
| 11-02 | Gp4 Focus 2 | g.chr3:129156679C>T  | Silent            | MBD4     | p.Q73Q   | methyl-CpG binding do    | 43 (0.00) | 22 (0.41) | 1.09 |
| 11-02 | Gp4 Focus 2 | g.chr6:20109936G>A   | Silent            | MBOAT1   | p.L418L  | membrane bound O-acy     | 33 (0.00) | 39 (0.36) | 1.39 |
| 11-02 | Gp4 Focus 2 | g.chr6:52141919G>A   | Missense Mutation | MCM3     | p.R371W  | minichromosome maint     | 47 (0.00) | 32 (0.16) | 0.42 |
| 11-02 | Gp4 Focus 2 | g.chr14:47687327C>T  | Silent            | MDGA2    | p.L95L   | MAM domain containin     | 26 (0.00) | 18 (0.44) | 1.19 |
| 11-02 | Gp4 Focus 2 | g.chr6:90385272C>T   | Silent            | MDN1     | p.R4224R | MDN1, midasin homolc     | 52 (0.00) | 28 (0.32) | 0.86 |
| 11-02 | Gp4 Focus 2 | g.chr6:90394600G>A   | Missense Mutation | MDN1     | p.L3942F | MDN1, midasin homolc     | 17 (0.00) | 19 (0.42) | 1.12 |
| 11-02 | Gp4 Focus 2 | g.chr6:90396712C>T   | Missense Mutation | MDN1     | p.M3827I | MDN1, midasin homolc     | 72 (0.00) | 23 (0.26) | 0.70 |
| 11-02 | Gp4 Focus 2 | g.chr18:48466723T>C  | Silent            | ME2      | p.N518N  | malic enzyme 2, NAD(+)   | 15 (0.00) | 43 (0.21) | 0.56 |
| 11-02 | Gp4 Focus 2 | g.chr17:37571299G>A  | Silent            | MED1     | p.F493F  | mediator complex subur   | 22 (0.00) | 49 (0.27) | 0.71 |

|       |             |                      |                   |           |          |                           |            |            |      |
|-------|-------------|----------------------|-------------------|-----------|----------|---------------------------|------------|------------|------|
| 11-02 | Gp4 Focus 2 | g.chr3:150840745C>T  | Missense Mutation | MED12L    | p.S127F  | mediator complex subur    | 50 (0.00)  | 15 (0.33)  | 0.89 |
| 11-02 | Gp4 Focus 2 | g.chr3:150883682C>T  | Silent            | MED12L    | p.H469H  | mediator complex subur    | 65 (0.00)  | 19 (0.47)  | 1.26 |
| 11-02 | Gp4 Focus 2 | g.chr16:3293285C>T   | Silent            | MEFV      | p.V554V  | Mediterranean fever       | 33 (0.00)  | 21 (0.29)  | 0.91 |
| 11-02 | Gp4 Focus 2 | g.chr16:3293656G>A   | Missense Mutation | MEFV      | p.L431F  | Mediterranean fever       | 38 (0.00)  | 17 (0.82)  | 2.63 |
| 11-02 | Gp4 Focus 2 | g.chr16:3306453G>A   | Silent            | MEFV      | p.I45I   | Mediterranean fever       | 25 (0.00)  | 22 (0.32)  | 1.02 |
| 11-02 | Gp4 Focus 2 | g.chr22:42101541C>T  | Missense Mutation | MEI1      | p.T111I  | meiosis inhibitor 1       | 117 (0.00) | 53 (0.36)  | 0.96 |
| 11-02 | Gp4 Focus 2 | g.chr11:64571878C>T  | Missense Mutation | MEN1      | p.M532I  | multiple endocrine neop   | 72 (0.00)  | 45 (0.16)  | 0.41 |
| 11-02 | Gp4 Focus 2 | g.chr18:29793207C>T  | Missense Mutation | MEP1B     | p.L422F  | meprin A, beta            | 48 (0.00)  | 12 (0.50)  | 1.33 |
| 11-02 | Gp4 Focus 2 | g.chr2:112758777G>A  | Splice Site       | MERTK     |          | MER proto-oncogene, ty    | 68 (0.00)  | 15 (0.40)  | 1.07 |
| 11-02 | Gp4 Focus 2 | g.chr7:130143815C>T  | Missense Mutation | MEST      | p.P290S  | mesoderm specific trans   | 45 (0.00)  | 32 (0.31)  | 0.83 |
| 11-02 | Gp4 Focus 2 | g.chr12:95868079A>G  | Missense Mutation | METAP2    | p.K42E   | methionyl aminopeptida    | 24 (0.00)  | 44 (0.66)  | 1.76 |
| 11-02 | Gp4 Focus 2 | g.chr1:170135666C>G  | Missense Mutation | METTTL11B | p.D118E  | methyltransferase like 1  | 73 (0.00)  | 142 (0.31) | 0.83 |
| 11-02 | Gp4 Focus 2 | g.chr14:21464950G>A  | Silent            | METTTL17  | p.L424L  | methyltransferase like 1  | 24 (0.00)  | 20 (0.40)  | 0.59 |
| 11-02 | Gp4 Focus 2 | g.chr12:56075785G>A  | Missense Mutation | METTTL7B  | p.A83T   | methyltransferase like 7  | 23 (0.00)  | 14 (0.36)  | 0.95 |
| 11-02 | Gp4 Focus 2 | g.chr3:179076711G>T  | Missense Mutation | MFN1      | p.C111F  | mitofusin 1               | 18 (0.00)  | 16 (0.50)  | 1.33 |
| 11-02 | Gp4 Focus 2 | g.chr1:40431202G>A   | Silent            | MFSD2A    | p.R179R  | major facilitator superfa | 28 (0.00)  | 39 (0.33)  | 0.89 |
| 11-02 | Gp4 Focus 2 | g.chr15:42041005C>T  | Missense Mutation | MGA       | p.P1795S | MGA, MAX dimerizati       | 56 (0.00)  | 16 (0.44)  | 1.17 |
| 11-02 | Gp4 Focus 2 | g.chr15:42052605C>T  | Missense Mutation | MGA       | p.R2426W | MGA, MAX dimerizati       | 27 (0.00)  | 40 (0.30)  | 0.80 |
| 11-02 | Gp4 Focus 2 | g.chr7:141740608C>A  | Silent            | MGAM      | p.I820I  | maltase-glucoamylase (;   | 40 (0.00)  | 28 (0.21)  | 0.57 |
| 11-02 | Gp4 Focus 2 | g.chr7:141782004C>T  | Silent            | MGAM      | p.P2055P | maltase-glucoamylase (;   | 15 (0.00)  | 16 (0.31)  | 0.83 |
| 11-02 | Gp4 Focus 2 | g.chr7:141795419C>T  | Silent            | MGAM      | p.L2505L | maltase-glucoamylase (;   | 37 (0.00)  | 14 (0.57)  | 1.52 |
| 11-02 | Gp4 Focus 2 | g.chr3:127411068G>T  | Silent            | MGLL      | p.A269A  | monoglyceride lipase      | 15 (0.00)  | 32 (0.22)  | 0.58 |
| 11-02 | Gp4 Focus 2 | g.chr22:18387461G>A  | Silent            | MICAL3    | p.L137L  | microtubule associated    | 188 (0.00) | 42 (0.48)  | 1.27 |
| 11-02 | Gp4 Focus 2 | g.chr22:18387503G>A  | Missense Mutation | MICAL3    | p.R123C  | microtubule associated    | 167 (0.00) | 31 (0.45)  | 1.20 |
| 11-02 | Gp4 Focus 2 | g.chr13:24453446G>A  | Missense Mutation | MIPEP     | p.A167V  | mitochondrial intermedi   | 39 (0.00)  | 13 (0.38)  | 1.03 |
| 11-02 | Gp4 Focus 2 | g.chr14:3777600T>A   | Missense Mutation | MIPOL1    | p.I204K  | mirror-image polydactyl   | 19 (0.00)  | 13 (0.46)  | 1.47 |
| 11-02 | Gp4 Focus 2 | g.chr3:163889267C>T  | RNA               | MIR1263   |          | microRNA 1263             | 26 (0.00)  | 26 (0.85)  | 2.26 |
| 11-02 | Gp4 Focus 2 | g.chrX:63005967C>T   | RNA               | MIR1468   |          | microRNA 1468             | 45 (0.00)  | 22 (0.45)  | 0.76 |
| 11-02 | Gp4 Focus 2 | g.chr10:129910560G>C | Silent            | MKI67     | p.A602A  | marker of proliferation   | 116 (0.00) | 22 (0.23)  | 0.61 |
| 11-02 | Gp4 Focus 2 | g.chr10:129913820G>A | Silent            | MKI67     | p.T284T  | marker of proliferation   | 123 (0.00) | 28 (0.25)  | 0.67 |
| 11-02 | Gp4 Focus 2 | g.chr16:14234481G>A  | Silent            | MKL2      | p.A6A    | MKL/myocardin-like 2      | 19 (0.00)  | 18 (0.44)  | 1.42 |
| 11-02 | Gp4 Focus 2 | g.chr1:47027230G>A   | Missense Mutation | MKNK1     | p.L350F  | MAP kinase interacting    | 23 (0.00)  | 13 (0.38)  | 1.03 |
| 11-02 | Gp4 Focus 2 | g.chr22:50523217G>A  | Silent            | MLC1      | p.L39L   | megalencephalic leukoe    | 20 (0.00)  | 29 (0.31)  | 0.83 |
| 11-02 | Gp4 Focus 2 | g.chr16:74725218C>T  | Missense Mutation | MLKL      | p.V227M  | mixed lineage kinase do   | 97 (0.00)  | 17 (0.29)  | 0.78 |
| 11-02 | Gp4 Focus 2 | g.chr19:6230611C>T   | Silent            | MLLT1     | p.E130E  | myeloid/lymphoid or mi    | 51 (0.00)  | 22 (0.27)  | 0.73 |

|       |             |                      |                   |           |          |                                    |           |      |
|-------|-------------|----------------------|-------------------|-----------|----------|------------------------------------|-----------|------|
| 11-02 | Gp4 Focus 2 | g.chr1:151039766G>A  | Silent            | MLLT11    | p.L22L   | myeloid/lymphoid or mi38 (0.00)    | 68 (0.72) | 1.92 |
| 11-02 | Gp4 Focus 2 | g.chr6:168344088C>T  | Missense Mutation | MLLT4     | p.R1051C | myeloid/lymphoid or mi26 (0.00)    | 14 (0.43) | 1.14 |
| 11-02 | Gp4 Focus 2 | g.chr16:83940661G>A  | Missense Mutation | MLYCD     | p.V200I  | malonyl-CoA decarboxy72 (0.00)     | 19 (0.58) | 1.54 |
| 11-02 | Gp4 Focus 2 | g.chr16:83940693G>A  | Silent            | MLYCD     | p.Q210Q  | malonyl-CoA decarboxy65 (0.00)     | 24 (0.75) | 2.00 |
| 11-02 | Gp4 Focus 2 | g.chr1:45973107G>A   | Missense Mutation | MMACHC    | p.S54N   | methylmalonic aciduria 31 (0.00)   | 10 (0.50) | 1.33 |
| 11-02 | Gp4 Focus 2 | g.chr12:56231137C>A  | Missense Mutation | MMP19     | p.D381Y  | matrix metallopeptidase 15 (0.00)  | 49 (0.24) | 0.65 |
| 11-02 | Gp4 Focus 2 | g.chr16:55539291G>A  | Silent            | MMP2      | p.L564L  | matrix metallopeptidase 57 (0.00)  | 52 (0.25) | 0.67 |
| 11-02 | Gp4 Focus 2 | g.chr22:28146974C>T  | Missense Mutation | MN1       | p.V1298M | meningioma (disrupted i15 (0.00)   | 34 (0.15) | 0.39 |
| 11-02 | Gp4 Focus 2 | g.chr20:49576586G>T  | Missense Mutation | MOCS3     | p.G403W  | molybdenum cofactor sy29 (0.00)    | 15 (0.40) | 1.07 |
| 11-02 | Gp4 Focus 2 | g.chr14:102732230G>A | Silent            | MOK       | p.L48L   | MOK protein kinase 51 (0.00)       | 14 (0.43) | 1.14 |
| 11-02 | Gp4 Focus 2 | g.chr16:77229564G>A  | Silent            | MON1B     | p.E367E  | MON1 secretory traffick25 (0.00)   | 11 (0.45) | 1.21 |
| 11-02 | Gp4 Focus 2 | g.chr12:62954549G>A  | Missense Mutation | MON2      | p.V1207I | MON2 homolog (S. cere38 (0.00)     | 21 (0.29) | 0.76 |
| 11-02 | Gp4 Focus 2 | g.chr22:31338227C>T  | Missense Mutation | MORC2     | p.R153Q  | MORC family CW-type84 (0.00)       | 16 (0.44) | 1.17 |
| 11-02 | Gp4 Focus 2 | g.chr22:50563963C>A  | Missense Mutation | MOV10L1   | p.P571Q  | Mov10 RISC complex F35 (0.00)      | 32 (0.22) | 0.58 |
| 11-02 | Gp4 Focus 2 | g.chr9:13106985G>A   | Silent            | MPDZ      | p.V2035V | multiple PDZ domain p140 (0.00)    | 27 (0.22) | 0.72 |
| 11-02 | Gp4 Focus 2 | g.chr9:13222341T>C   | Missense Mutation | MPDZ      | p.K213R  | multiple PDZ domain p138 (0.00)    | 37 (0.14) | 0.44 |
| 11-02 | Gp4 Focus 2 | g.chr2:71375227G>T   | Missense Mutation | MPHOSPH10 | p.E552D  | M-phase phosphoprotein29 (0.00)    | 23 (0.39) | 1.04 |
| 11-02 | Gp4 Focus 2 | g.chr1:43805233G>A   | Missense Mutation | MPL       | p.S228N  | MPL proto-oncogene, t16 (0.00)     | 11 (0.64) | 1.70 |
| 11-02 | Gp4 Focus 2 | g.chr17:56352964G>T  | Missense Mutation | MPO       | p.P435H  | myeloperoxidase 16 (0.00)          | 11 (0.45) | 1.21 |
| 11-02 | Gp4 Focus 2 | g.chrX:154014670G>A  | Silent            | MPP1      | p.F162F  | membrane protein, palm60 (0.00)    | 64 (0.27) | 0.44 |
| 11-02 | Gp4 Focus 2 | g.chr7:24689243G>A   | Missense Mutation | MPP6      | p.A95T   | membrane protein, palm92 (0.00)    | 14 (0.36) | 0.95 |
| 11-02 | Gp4 Focus 2 | g.chr10:28491141C>T  | Missense Mutation | MPP7      | p.E33K   | membrane protein, palm48 (0.00)    | 10 (0.50) | 1.67 |
| 11-02 | Gp4 Focus 2 | g.chr17:17075037G>A  | Silent            | MPRIP     | p.T723T  | myosin phosphatase Rh76 (0.00)     | 18 (0.33) | 0.89 |
| 11-02 | Gp4 Focus 2 | g.chr1:181021483C>T  | Silent            | MR1       | p.N239N  | major histocompatibility49 (0.00)  | 31 (0.84) | 2.24 |
| 11-02 | Gp4 Focus 2 | g.chr10:18138627G>A  | Missense Mutation | MRC1      | p.G395S  | mannose receptor, C typ38 (0.03)   | 25 (0.40) | 1.34 |
| 11-02 | Gp4 Focus 2 | g.chr10:17875703G>A  | Missense Mutation | MRC1L1    | p.D223N  | 38 (0.00)                          | 20 (0.30) | 1.00 |
| 11-02 | Gp4 Focus 2 | g.chr17:60749511C>T  | Missense Mutation | MRC2      | p.P487S  | mannose receptor, C typ37 (0.00)   | 11 (0.55) | 1.45 |
| 11-02 | Gp4 Focus 2 | g.chr11:94201043T>C  | Missense Mutation | MRE11A    | p.E345G  | MRE11 meiotic recomb 73 (0.00)     | 16 (0.38) | 1.00 |
| 11-02 | Gp4 Focus 2 | g.chr1:55174688G>A   | Splice Site       | MROH7     | p.G1223G | maestro heat-like repeat 23 (0.00) | 23 (0.26) | 0.70 |
| 11-02 | Gp4 Focus 2 | g.chr1:55174702G>A   | Missense Mutation | MROH7     | p.C1228Y | maestro heat-like repeat 23 (0.00) | 25 (0.24) | 0.64 |
| 11-02 | Gp4 Focus 2 | g.chr11:6703553C>T   | Silent            | MRPL17    | p.L108L  | mitochondrial ribosoma 96 (0.00)   | 11 (0.45) | 1.21 |
| 11-02 | Gp4 Focus 2 | g.chr21:35497753C>T  | Missense Mutation | MRPS6     | p.A53V   | mitochondrial ribosoma 243 (0.00)  | 35 (0.14) | 0.38 |
| 11-02 | Gp4 Focus 2 | g.chr9:125075659G>A  | Silent            | MRRF      | p.E235E  | mitochondrial ribosome 28 (0.00)   | 21 (0.24) | 0.50 |
| 11-02 | Gp4 Focus 2 | g.chr11:10597988G>A  | Missense Mutation | MRVI1     | p.S877F  | murine retrovirus integr73 (0.00)  | 87 (0.17) | 0.46 |
| 11-02 | Gp4 Focus 2 | g.chr11:10625976C>A  | Silent            | MRVI1     | p.L573L  | murine retrovirus integr70 (0.00)  | 22 (0.23) | 0.61 |

|       |             |                     |                   |        |           |                           |            |            |      |
|-------|-------------|---------------------|-------------------|--------|-----------|---------------------------|------------|------------|------|
| 11-02 | Gp4 Focus 2 | g.chr11:10631287C>T | Missense Mutation | MRVII  | p.S520N   | murine retrovirus integr  | 22 (0.00)  | 23 (0.35)  | 0.93 |
| 11-02 | Gp4 Focus 2 | g.chr11:60235857G>A | Silent            | MS4A1  | p.E270E   | membrane-spanning 4-d     | 31 (0.00)  | 32 (0.19)  | 0.50 |
| 11-02 | Gp4 Focus 2 | g.chr10:75184911G>A | Missense Mutation | MSS51  | p.P370S   | MSS51 mitochondrial tr    | 41 (0.00)  | 25 (0.24)  | 0.64 |
| 11-02 | Gp4 Focus 2 | g.chr10:75184930G>A | Silent            | MSS51  | p.D363D   | MSS51 mitochondrial tr    | 42 (0.00)  | 20 (0.25)  | 0.67 |
| 11-02 | Gp4 Focus 2 | g.chr16:56667727G>A | Silent            | MT1M   | p.T53T    | metallothionein 1M        | 76 (0.00)  | 64 (0.25)  | 0.67 |
| 11-02 | Gp4 Focus 2 | g.chr8:121463249C>T | Missense Mutation | MTBP   | p.S69L    | MDM2 binding protein      | 22 (0.00)  | 19 (0.32)  | 1.08 |
| 11-02 | Gp4 Focus 2 | g.chr15:65319329G>A | Missense Mutation | MTFMT  | p.P87S    | mitochondrial methion     | 50 (0.00)  | 33 (0.24)  | 0.65 |
| 11-02 | Gp4 Focus 2 | g.chr2:55476566C>T  | Missense Mutation | MTIF2  | p.G316S   | mitochondrial translati   | 56 (0.00)  | 23 (0.22)  | 0.58 |
| 11-02 | Gp4 Focus 2 | g.chrX:149895727G>A | Silent            | MTMR1  | p.V123V   | myotubularin related pr   | 34 (0.00)  | 31 (0.23)  | 0.38 |
| 11-02 | Gp4 Focus 2 | g.chr1:149905823G>A | Silent            | MTMR11 | p.Y160Y   | myotubularin related pr   | 78 (0.00)  | 55 (0.16)  | 0.44 |
| 11-02 | Gp4 Focus 2 | g.chr3:9730655G>A   | Missense Mutation | MTMR14 | p.S441N   | myotubularin related pr   | 35 (0.00)  | 60 (0.15)  | 0.40 |
| 11-02 | Gp4 Focus 2 | g.chr8:17157389G>A  | Silent            | MTMR7  | p.A655A   | myotubularin related pr   | 35 (0.00)  | 32 (0.34)  | 0.92 |
| 11-02 | Gp4 Focus 2 | g.chr6:74176006G>A  | Missense Mutation | MTO1   | p.G98S    | mitochondrial tRNA tra    | 56 (0.00)  | 29 (0.17)  | 0.46 |
| 11-02 | Gp4 Focus 2 | g.chr7:135614743C>G | Silent            | MTPN   | p.V96V    | myotrophin                | 45 (0.00)  | 41 (0.27)  | 0.72 |
| 11-02 | Gp4 Focus 2 | g.chr13:41791319G>A | Silent            | MTRF1  | p.L424L   | mitochondrial translati   | 64 (0.00)  | 41 (0.15)  | 0.39 |
| 11-02 | Gp4 Focus 2 | g.chr5:79286470G>A  | Missense Mutation | MTX3   | p.S33F    | metaxin 3                 | 76 (0.00)  | 11 (0.45)  | 1.21 |
| 11-02 | Gp4 Focus 2 | g.chr7:100635274C>T | Missense Mutation | MUC12  | p.T620I   | mucin 12, cell surface a  | 59 (0.02)  | 51 (0.16)  | 0.42 |
| 11-02 | Gp4 Focus 2 | g.chr7:100643524C>T | Missense Mutation | MUC12  | p.P3370L  | mucin 12, cell surface a  | 465 (0.00) | 178 (0.16) | 0.42 |
| 11-02 | Gp4 Focus 2 | g.chr19:8971738G>A  | Missense Mutation | MUC16  | p.T14285I | mucin 16, cell surface a  | 35 (0.00)  | 9 (0.56)   | 1.48 |
| 11-02 | Gp4 Focus 2 | g.chr19:9018186G>A  | Silent            | MUC16  | p.F12584F | mucin 16, cell surface a  | 17 (0.00)  | 30 (0.30)  | 0.80 |
| 11-02 | Gp4 Focus 2 | g.chr19:9024840C>T  | Missense Mutation | MUC16  | p.S12341N | mucin 16, cell surface a  | 71 (0.00)  | 38 (0.24)  | 0.63 |
| 11-02 | Gp4 Focus 2 | g.chr19:9047270G>A  | Missense Mutation | MUC16  | p.P11454L | mucin 16, cell surface a  | 49 (0.00)  | 43 (0.16)  | 0.43 |
| 11-02 | Gp4 Focus 2 | g.chr19:9048201C>T  | Missense Mutation | MUC16  | p.V11144I | mucin 16, cell surface a  | 46 (0.00)  | 31 (0.23)  | 0.60 |
| 11-02 | Gp4 Focus 2 | g.chr19:9060539C>T  | Silent            | MUC16  | p.V8969V  | mucin 16, cell surface a  | 26 (0.00)  | 129 (0.16) | 0.41 |
| 11-02 | Gp4 Focus 2 | g.chr19:9062536G>A  | Silent            | MUC16  | p.L8304L  | mucin 16, cell surface a  | 20 (0.00)  | 59 (0.46)  | 1.22 |
| 11-02 | Gp4 Focus 2 | g.chr19:9064750C>T  | Missense Mutation | MUC16  | p.V7566M  | mucin 16, cell surface a  | 88 (0.00)  | 41 (0.15)  | 0.39 |
| 11-02 | Gp4 Focus 2 | g.chr19:9070141C>A  | Nonsense Mutation | MUC16  | p.E5769*  | mucin 16, cell surface a  | 60 (0.00)  | 15 (0.47)  | 1.24 |
| 11-02 | Gp4 Focus 2 | g.chr19:9073518G>A  | Missense Mutation | MUC16  | p.A4643V  | mucin 16, cell surface a  | 37 (0.00)  | 18 (0.56)  | 1.48 |
| 11-02 | Gp4 Focus 2 | g.chr19:9075970C>T  | Missense Mutation | MUC16  | p.G3826R  | mucin 16, cell surface a  | 78 (0.00)  | 135 (0.16) | 0.43 |
| 11-02 | Gp4 Focus 2 | g.chr19:9077378C>T  | Silent            | MUC16  | p.G3356G  | mucin 16, cell surface a  | 24 (0.00)  | 29 (0.31)  | 0.83 |
| 11-02 | Gp4 Focus 2 | g.chr19:9083895G>A  | Silent            | MUC16  | p.F2640F  | mucin 16, cell surface a  | 24 (0.00)  | 40 (0.40)  | 1.07 |
| 11-02 | Gp4 Focus 2 | g.chr19:9088600G>A  | Missense Mutation | MUC16  | p.T1072I  | mucin 16, cell surface a  | 43 (0.02)  | 50 (0.44)  | 1.17 |
| 11-02 | Gp4 Focus 2 | g.chr19:9090696G>A  | Silent            | MUC16  | p.T373T   | mucin 16, cell surface a  | 15 (0.00)  | 14 (0.36)  | 0.95 |
| 11-02 | Gp4 Focus 2 | g.chr7:100680987C>T | Missense Mutation | MUC17  | p.P2097L  | mucin 17, cell surface a  | 31 (0.00)  | 13 (0.62)  | 1.64 |
| 11-02 | Gp4 Focus 2 | g.chr3:195487827G>A | Silent            | MUC4   | p.L690L   | mucin 4, cell surface ass | 16 (0.00)  | 12 (0.67)  | 1.78 |

|       |             |                      |                   |        |          |                                     |           |      |
|-------|-------------|----------------------|-------------------|--------|----------|-------------------------------------|-----------|------|
| 11-02 | Gp4 Focus 2 | g.chr11:1264091G>T   | Missense Mutation | MUC5B  | p.R1994L | mucin 5B, oligomeric m70 (0.00)     | 51 (0.20) | 0.52 |
| 11-02 | Gp4 Focus 2 | g.chr19:1360162C>A   | Missense Mutation | MUM1   | p.P82H   | melanoma associated an 17 (0.00)    | 31 (0.16) | 0.43 |
| 11-02 | Gp4 Focus 2 | g.chr11:65632541G>A  | Silent            | MUS81  | p.G442G  | MUS81 structure-specif 83 (0.00)    | 31 (0.45) | 1.20 |
| 11-02 | Gp4 Focus 2 | g.chr9:113547156C>A  | Silent            | MUSK   | p.S482S  | muscle, skeletal, receptc 86 (0.00) | 44 (0.16) | 0.42 |
| 11-02 | Gp4 Focus 2 | g.chr16:29859118C>T  | Silent            | MVP    | p.T830T  | major vault protein 35 (0.00)       | 29 (0.21) | 0.55 |
| 11-02 | Gp4 Focus 2 | g.chr6:135511482G>A  | Missense Mutation | MYB    | p.G175E  | v-myb avian myeloblast 29 (0.00)    | 22 (0.45) | 1.21 |
| 11-02 | Gp4 Focus 2 | g.chr8:128753058A>G  | Missense Mutation | MYC    | p.K407E  | v-myc avian myelocytot 68 (0.00)    | 33 (0.45) | 1.56 |
| 11-02 | Gp4 Focus 2 | g.chr13:77641995G>A  | Missense Mutation | MYCBP2 | p.T4021I | MYC binding protein 2, 75 (0.00)    | 21 (0.24) | 0.63 |
| 11-02 | Gp4 Focus 2 | g.chr15:48443727A>G  | Missense Mutation | MYEF2  | p.F417L  | myelin expression facto 264 (0.00)  | 24 (0.38) | 1.00 |
| 11-02 | Gp4 Focus 2 | g.chr15:48446046G>A  | Missense Mutation | MYEF2  | p.P344S  | myelin expression facto 27 (0.00)   | 20 (0.35) | 0.93 |
| 11-02 | Gp4 Focus 2 | g.chr16:15826475C>T  | Silent            | MYH11  | p.Q1199Q | myosin, heavy chain 11, 24 (0.00)   | 44 (0.20) | 0.55 |
| 11-02 | Gp4 Focus 2 | g.chr17:10235503C>G  | Silent            | MYH13  | p.G737G  | myosin, heavy chain 13, 47 (0.00)   | 33 (0.21) | 0.57 |
| 11-02 | Gp4 Focus 2 | g.chr3:108147371G>A  | Silent            | MYH15  | p.L1244L | myosin, heavy chain 15 74 (0.00)    | 44 (0.16) | 0.42 |
| 11-02 | Gp4 Focus 2 | g.chr3:108175686C>T  | Missense Mutation | MYH15  | p.G709S  | myosin, heavy chain 15 33 (0.00)    | 16 (0.31) | 0.83 |
| 11-02 | Gp4 Focus 2 | g.chr17:10442603G>A  | Silent            | MYH2   | p.R445R  | myosin, heavy chain 2, 66 (0.00)    | 73 (0.25) | 0.66 |
| 11-02 | Gp4 Focus 2 | g.chr17:10537014G>A  | Missense Mutation | MYH3   | p.T1514I | myosin, heavy chain 3, 25 (0.00)    | 10 (0.60) | 1.60 |
| 11-02 | Gp4 Focus 2 | g.chr17:10541369C>T  | Silent            | MYH3   | p.S1240S | myosin, heavy chain 3, 38 (0.00)    | 55 (0.18) | 0.48 |
| 11-02 | Gp4 Focus 2 | g.chr17:10541370G>T  | Nonsense Mutation | MYH3   | p.S1240* | myosin, heavy chain 3, 38 (0.00)    | 56 (0.18) | 0.48 |
| 11-02 | Gp4 Focus 2 | g.chr17:10541401C>T  | Missense Mutation | MYH3   | p.D1230N | myosin, heavy chain 3, 36 (0.00)    | 50 (0.18) | 0.48 |
| 11-02 | Gp4 Focus 2 | g.chr17:10350372C>T  | Silent            | MYH4   | p.E1709E | myosin, heavy chain 4, 62 (0.00)    | 27 (0.19) | 0.49 |
| 11-02 | Gp4 Focus 2 | g.chr17:10359219C>T  | Splice Site       | MYH4   |          | myosin, heavy chain 4, 48 (0.00)    | 34 (0.26) | 0.71 |
| 11-02 | Gp4 Focus 2 | g.chr14:23868190G>A  | Silent            | MYH6   | p.D546D  | myosin, heavy chain 6, 15 (0.00)    | 13 (0.38) | 0.56 |
| 11-02 | Gp4 Focus 2 | g.chr22:36716396A>G  | Missense Mutation | MYH9   | p.L294S  | myosin, heavy chain 9, 18 (0.00)    | 19 (0.37) | 0.98 |
| 11-02 | Gp4 Focus 2 | g.chr3:123451767A>T  | Missense Mutation | MYLK   | p.C498S  | myosin light chain kinas 21 (0.00)  | 33 (0.18) | 0.48 |
| 11-02 | Gp4 Focus 2 | g.chr6:2679543C>T    | Missense Mutation | MYLK4  | p.M286I  | myosin light chain kinas 85 (0.00)  | 45 (0.20) | 0.38 |
| 11-02 | Gp4 Focus 2 | g.chr6:2679599C>T    | Missense Mutation | MYLK4  | p.E268K  | myosin light chain kinas 90 (0.00)  | 22 (0.23) | 0.43 |
| 11-02 | Gp4 Focus 2 | g.chr6:2679615C>T    | Silent            | MYLK4  | p.V262V  | myosin light chain kinas 58 (0.00)  | 19 (0.26) | 0.50 |
| 11-02 | Gp4 Focus 2 | g.chr5:16675200G>A   | Silent            | MYO10  | p.L1576L | myosin X 16 (0.00)                  | 20 (0.30) | 0.80 |
| 11-02 | Gp4 Focus 2 | g.chr5:16754955G>A   | Silent            | MYO10  | p.I637I  | myosin X 51 (0.00)                  | 14 (0.50) | 1.33 |
| 11-02 | Gp4 Focus 2 | g.chr5:16766253G>A   | Missense Mutation | MYO10  | p.A372V  | myosin X 66 (0.00)                  | 39 (0.38) | 1.03 |
| 11-02 | Gp4 Focus 2 | g.chr17:18069778C>T  | Silent            | MYO15A | p.L561L  | myosin XVA 29 (0.00)                | 31 (0.23) | 0.60 |
| 11-02 | Gp4 Focus 2 | g.chr17:34857067G>A  | Missense Mutation | MYO19  | p.P697S  | myosin XIX 21 (0.00)                | 19 (0.26) | 0.70 |
| 11-02 | Gp4 Focus 2 | g.chr12:57441087C>G  | Splice Site       | MYO1A  | p.A144P  | myosin IA 34 (0.00)                 | 17 (0.71) | 1.88 |
| 11-02 | Gp4 Focus 2 | g.chr19:8618256G>A   | Missense Mutation | MYO1F  | p.S131F  | myosin IF 17 (0.00)                 | 30 (0.20) | 0.53 |
| 11-02 | Gp4 Focus 2 | g.chr12:109876370G>A | Missense Mutation | MYO1H  | p.A731T  | myosin IH 27 (0.00)                 | 17 (0.71) | 1.88 |

|       |             |                      |                   |          |          |                                          |            |           |      |
|-------|-------------|----------------------|-------------------|----------|----------|------------------------------------------|------------|-----------|------|
| 11-02 | Gp4 Focus 2 | g.chr12:109882089G>A | Splice Site       | MYO1H    |          | myosin IH                                | 136 (0.00) | 55 (0.29) | 0.78 |
| 11-02 | Gp4 Focus 2 | g.chr17:12649298C>A  | Missense Mutation | MYOCD    | p.P345H  | myocardin                                | 72 (0.00)  | 10 (0.70) | 1.87 |
| 11-02 | Gp4 Focus 2 | g.chr4:120072061C>A  | Missense Mutation | MYOZ2    | p.S37R   | myozenin 2                               | 17 (0.00)  | 22 (0.27) | 0.73 |
| 11-02 | Gp4 Focus 2 | g.chr2:1926331C>T    | Missense Mutation | MYT1L    | p.G404R  | myelin transcription factor 26 (0.00)    | 13 (0.38)  | 1.25      |      |
| 11-02 | Gp4 Focus 2 | g.chr3:175184861C>A  | Silent            | NAALADL2 | p.I474I  | N-acetylated alpha-linker 121 (0.00)     | 37 (0.22)  | 0.58      |      |
| 11-02 | Gp4 Focus 2 | g.chr11:71166216G>A  | Splice Site       | NADSYN1  | p.C49Y   | NAD synthetase 1                         | 35 (0.00)  | 25 (0.28) | 0.75 |
| 11-02 | Gp4 Focus 2 | g.chr17:40695054G>A  | Missense Mutation | NAGLU    | p.E344K  | N-acetylglucosaminidase 37 (0.00)        | 32 (0.16)  | 0.42      |      |
| 11-02 | Gp4 Focus 2 | g.chr17:80422162G>A  | Splice Site       | NARF     |          | nuclear prelamin A receptor 26 (0.00)    | 15 (0.33)  | 0.89      |      |
| 11-02 | Gp4 Focus 2 | g.chr1:46073091A>G   | Missense Mutation | NASP     | p.T170A  | nuclear autoantigenic spot 23 (0.00)     | 29 (0.21)  | 0.55      |      |
| 11-02 | Gp4 Focus 2 | g.chr11:34153684T>A  | Missense Mutation | NAT10    | p.N511K  | N-acetyltransferase 10 (104 (0.00))      | 55 (0.16)  | 0.44      |      |
| 11-02 | Gp4 Focus 2 | g.chr1:201687882G>A  | Splice Site       | NAV1     | p.G422S  | neuron navigator 1                       | 52 (0.00)  | 31 (0.16) | 0.43 |
| 11-02 | Gp4 Focus 2 | g.chr1:201763609G>A  | Missense Mutation | NAV1     | p.D1097N | neuron navigator 1                       | 41 (0.00)  | 33 (0.15) | 0.40 |
| 11-02 | Gp4 Focus 2 | g.chr11:20070467C>T  | Missense Mutation | NAV2     | p.P1302S | neuron navigator 2                       | 21 (0.00)  | 41 (0.20) | 0.52 |
| 11-02 | Gp4 Focus 2 | g.chr12:78225277G>T  | Missense Mutation | NAV3     | p.Q12H   | neuron navigator 3                       | 88 (0.00)  | 30 (0.17) | 0.44 |
| 11-02 | Gp4 Focus 2 | g.chr12:78513277G>A  | Missense Mutation | NAV3     | p.A1101T | neuron navigator 3                       | 96 (0.00)  | 29 (0.48) | 1.29 |
| 11-02 | Gp4 Focus 2 | g.chr13:35733379C>A  | Missense Mutation | NBEA     | p.T1024N | neurobeachin                             | 155 (0.00) | 43 (0.26) | 0.68 |
| 11-02 | Gp4 Focus 2 | g.chr13:36242649G>A  | Missense Mutation | NBEA     | p.D2912N | neurobeachin                             | 82 (0.00)  | 43 (0.47) | 1.24 |
| 11-02 | Gp4 Focus 2 | g.chr2:204078348T>A  | Missense Mutation | NBEAL1   | p.I2652N | neurobeachin-like 1                      | 27 (0.00)  | 27 (0.37) | 0.99 |
| 11-02 | Gp4 Focus 2 | g.chr1:16892246C>T   | Silent            | NBPF1    | p.L982L  | neuroblastoma breakpoint 153 (0.00)      | 59 (0.17)  | 0.45      |      |
| 11-02 | Gp4 Focus 2 | g.chr11:113076362G>A | Missense Mutation | NCAM1    | p.G37D   | neural cell adhesion molecule 150 (0.01) | 76 (0.21)  | 0.56      |      |
| 11-02 | Gp4 Focus 2 | g.chr12:6637133G>A   | Splice Site       | NCAPD2   |          | non-SMC condensin I complex 60 (0.00)    | 35 (0.26)  | 0.69      |      |
| 11-02 | Gp4 Focus 2 | g.chr12:6637175G>A   | Missense Mutation | NCAPD2   | p.V1021I | non-SMC condensin I complex 53 (0.00)    | 29 (0.17)  | 0.46      |      |
| 11-02 | Gp4 Focus 2 | g.chr7:158443563G>T  | Silent            | NCAPG2   | p.I1012I | non-SMC condensin II complex 69 (0.00)   | 52 (0.21)  | 0.56      |      |
| 11-02 | Gp4 Focus 2 | g.chr1:183534883G>A  | Missense Mutation | NCF2     | p.A319V  | neutrophil cytosolic factor 20 (0.00)    | 22 (0.45)  | 1.21      |      |
| 11-02 | Gp4 Focus 2 | g.chr2:24929742C>T   | Missense Mutation | NCOA1    | p.S468F  | nuclear receptor coactivator 84 (0.00)   | 31 (0.16)  | 0.43      |      |
| 11-02 | Gp4 Focus 2 | g.chr2:24929808G>A   | Missense Mutation | NCOA1    | p.R490K  | nuclear receptor coactivator 56 (0.00)   | 32 (0.22)  | 0.58      |      |
| 11-02 | Gp4 Focus 2 | g.chr20:44691228G>A  | Missense Mutation | NCOA5    | p.P484L  | nuclear receptor coactivator 26 (0.00)   | 10 (0.60)  | 1.60      |      |
| 11-02 | Gp4 Focus 2 | g.chr20:33334692G>T  | Missense Mutation | NCOA6    | p.Q945K  | nuclear receptor coactivator 52 (0.00)   | 16 (0.31)  | 0.83      |      |
| 11-02 | Gp4 Focus 2 | g.chr12:124915216C>T | Missense Mutation | NCOR2    | p.E334K  | nuclear receptor corepressor 17 (0.00)   | 41 (0.22)  | 0.59      |      |
| 11-02 | Gp4 Focus 2 | g.chr16:15758708T>A  | Missense Mutation | NDE1     | p.Y25N   | nudE neurodevelopmental 15 (0.00)        | 26 (0.38)  | 1.03      |      |
| 11-02 | Gp4 Focus 2 | g.chr7:140402703C>T  | Nonsense Mutation | NDUFB2   | p.Q19*   | NADH dehydrogenase (39 (0.00))           | 42 (0.50)  | 1.33      |      |
| 11-02 | Gp4 Focus 2 | g.chr2:206994871G>A  | Missense Mutation | NDUFS1   | p.A550V  | NADH dehydrogenase (84 (0.01))           | 21 (0.43)  | 1.14      |      |
| 11-02 | Gp4 Focus 2 | g.chr11:67377091G>A  | Silent            | NDUFV1   | p.E165E  | NADH dehydrogenase (44 (0.00))           | 33 (0.18)  | 0.48      |      |
| 11-02 | Gp4 Focus 2 | g.chr2:152362040G>A  | Silent            | NEB      | p.D7898D | nebulin                                  | 146 (0.01) | 24 (0.71) | 2.30 |
| 11-02 | Gp4 Focus 2 | g.chr2:152424832G>A  | Nonsense Mutation | NEB      | p.Q5912* | nebulin                                  | 16 (0.00)  | 21 (0.48) | 1.55 |



|       |             |                      |                   |         |          |                             |            |           |      |
|-------|-------------|----------------------|-------------------|---------|----------|-----------------------------|------------|-----------|------|
| 11-02 | Gp4 Focus 2 | g.chr2:152477454G>A  | Silent            | NEB     | p.A3513A | nebulin                     | 79 (0.00)  | 34 (0.35) | 1.15 |
| 11-02 | Gp4 Focus 2 | g.chr2:152507241G>A  | Silent            | NEB     | p.S2358S | nebulin                     | 119 (0.00) | 72 (0.25) | 0.81 |
| 11-02 | Gp4 Focus 2 | g.chr8:24775269C>T   | Missense Mutation | NEFM    | p.P634L  | neurofilament, medium       | 37 (0.00)  | 31 (0.23) | 0.60 |
| 11-02 | Gp4 Focus 2 | g.chr17:27068157C>T  | Silent            | NEK8    | p.R598R  | NIMA-related kinase 8       | 44 (0.00)  | 28 (0.25) | 0.67 |
| 11-02 | Gp4 Focus 2 | g.chr10:5494420C>T   | Silent            | NET1    | p.L101L  | neuroepithelial cell trans  | 30 (0.03)  | 18 (0.78) | 2.60 |
| 11-02 | Gp4 Focus 2 | g.chr1:204985517G>A  | Silent            | NFASC   | p.L1191L | neurofascin                 | 52 (0.00)  | 35 (0.63) | 1.68 |
| 11-02 | Gp4 Focus 2 | g.chr16:69687152C>T  | Nonsense Mutation | NFAT5   | p.Q182*  | nuclear factor of activat   | 31 (0.00)  | 29 (0.31) | 0.83 |
| 11-02 | Gp4 Focus 2 | g.chr12:54686940C>T  | Missense Mutation | NFE2    | p.G114S  | nuclear factor, erythroid   | 20 (0.00)  | 35 (0.23) | 0.61 |
| 11-02 | Gp4 Focus 2 | g.chr9:14125733C>A   | Nonsense Mutation | NFIB    | p.E320*  | nuclear factor I/B          | 67 (0.00)  | 30 (0.27) | 0.87 |
| 11-02 | Gp4 Focus 2 | g.chr9:14125743C>T   | Missense Mutation | NFIB    | p.M316I  | nuclear factor I/B          | 62 (0.00)  | 30 (0.37) | 1.19 |
| 11-02 | Gp4 Focus 2 | g.chr4:103459079G>A  | Missense Mutation | NFKB1   | p.S75N   | nuclear factor of kappa l   | 112 (0.00) | 31 (0.19) | 0.52 |
| 11-02 | Gp4 Focus 2 | g.chr4:103514711G>A  | Missense Mutation | NFKB1   | p.G399E  | nuclear factor of kappa l   | 81 (0.00)  | 25 (0.24) | 0.64 |
| 11-02 | Gp4 Focus 2 | g.chr4:103514717C>T  | Missense Mutation | NFKB1   | p.T401I  | nuclear factor of kappa l   | 37 (0.00)  | 33 (0.21) | 0.57 |
| 11-02 | Gp4 Focus 2 | g.chr10:104157285G>A | Splice Site       | NFKB2   | p.E168E  | nuclear factor of kappa l   | 76 (0.00)  | 33 (0.15) | 0.40 |
| 11-02 | Gp4 Focus 2 | g.chr10:104157790C>G | Silent            | NFKB2   | p.G238G  | nuclear factor of kappa l   | 68 (0.00)  | 35 (0.14) | 0.38 |
| 11-02 | Gp4 Focus 2 | g.chr19:39395720C>A  | Missense Mutation | NFKBIB  | p.A82D   | nuclear factor of kappa l   | 67 (0.00)  | 12 (0.83) | 2.22 |
| 11-02 | Gp4 Focus 2 | g.chr6:44227963G>A   | Silent            | NFKBIE  | p.G418G  | nuclear factor of kappa l   | 17 (0.00)  | 47 (0.68) | 1.82 |
| 11-02 | Gp4 Focus 2 | g.chr11:129758672C>T | Missense Mutation | NFRKB   | p.V52I   | nuclear factor related to   | 22 (0.00)  | 18 (0.33) | 0.89 |
| 11-02 | Gp4 Focus 2 | g.chr20:34278410G>A  | Silent            | NFS1    | p.S162S  | NFS1 cysteine desulfur      | 23 (0.00)  | 36 (0.42) | 1.11 |
| 11-02 | Gp4 Focus 2 | g.chr4:47887934T>A   | Missense Mutation | NFXL1   | p.E542D  | nuclear transcription fac   | 126 (0.00) | 13 (0.38) | 1.03 |
| 11-02 | Gp4 Focus 2 | g.chr2:233757684C>T  | Missense Mutation | NGEF    | p.A264T  | neuronal guanine nuclec     | 22 (0.00)  | 40 (0.75) | 2.00 |
| 11-02 | Gp4 Focus 2 | g.chr3:25781120C>T   | Missense Mutation | NGLY1   | p.E235K  | N-glycanase 1               | 41 (0.00)  | 35 (0.26) | 0.69 |
| 11-02 | Gp4 Focus 2 | g.chr5:37059099G>A   | Missense Mutation | NIPBL   | p.R2506H | Nipped-B homolog (Drc       | 24 (0.00)  | 60 (0.28) | 0.76 |
| 11-02 | Gp4 Focus 2 | g.chr6:28227597G>A   | Missense Mutation | NKAPL   | p.E150K  | NFKB activating proteir     | 44 (0.00)  | 70 (0.29) | 0.76 |
| 11-02 | Gp4 Focus 2 | g.chr16:50667185C>T  | Silent            | NKD1    | p.A302A  | naked cuticle homolog       | 121 (0.00) | 16 (0.38) | 1.00 |
| 11-02 | Gp4 Focus 2 | g.chr17:40175861G>A  | Missense Mutation | NKIRAS2 | p.A120T  | NFKB inhibitor interact     | 32 (0.00)  | 26 (0.23) | 0.62 |
| 11-02 | Gp4 Focus 2 | g.chr3:42678683C>T   | Missense Mutation | NKTR    | p.S496L  | natural killer cell trigger | 58 (0.00)  | 17 (0.29) | 0.78 |
| 11-02 | Gp4 Focus 2 | g.chr3:42678695G>T   | Missense Mutation | NKTR    | p.W500L  | natural killer cell trigger | 58 (0.00)  | 20 (0.25) | 0.67 |
| 11-02 | Gp4 Focus 2 | g.chr3:42678698C>T   | Missense Mutation | NKTR    | p.S501F  | natural killer cell trigger | 57 (0.00)  | 20 (0.25) | 0.67 |
| 11-02 | Gp4 Focus 2 | g.chr3:173997181C>A  | Missense Mutation | NLGN1   | p.Q464K  | neuroligin 1                | 48 (0.00)  | 20 (0.35) | 0.93 |
| 11-02 | Gp4 Focus 2 | g.chr3:173998576C>T  | Missense Mutation | NLGN1   | p.T652I  | neuroligin 1                | 46 (0.00)  | 25 (0.40) | 1.07 |
| 11-02 | Gp4 Focus 2 | g.chr17:26370319G>A  | Silent            | NLK     | p.P140P  | nemo-like kinase            | 72 (0.00)  | 29 (0.21) | 0.55 |
| 11-02 | Gp4 Focus 2 | g.chr16:57100503G>A  | Silent            | NLRC5   | p.E1433E | NLR family, CARD dor        | 16 (0.00)  | 17 (0.53) | 1.41 |
| 11-02 | Gp4 Focus 2 | g.chr17:5433981C>G   | Missense Mutation | NLRP1   | p.G1114R | NLR family, pyrin dom       | 56 (0.00)  | 26 (0.27) | 0.72 |
| 11-02 | Gp4 Focus 2 | g.chr17:5462433G>A   | Missense Mutation | NLRP1   | p.T528I  | NLR family, pyrin dom       | 31 (0.00)  | 26 (0.42) | 1.13 |

|       |             |                      |                   |        |          |                                      |            |      |
|-------|-------------|----------------------|-------------------|--------|----------|--------------------------------------|------------|------|
| 11-02 | Gp4 Focus 2 | g.chr19:54313706C>T  | Missense Mutation | NLRP12 | p.V403I  | NLR family, pyrin dom:65 (0.02)      | 30 (0.27)  | 0.71 |
| 11-02 | Gp4 Focus 2 | g.chr19:56423897C>A  | Missense Mutation | NLRP13 | p.W429L  | NLR family, pyrin dom:35 (0.00)      | 30 (0.33)  | 0.89 |
| 11-02 | Gp4 Focus 2 | g.chr11:7063968G>A   | Nonsense Mutation | NLRP14 | p.W237*  | NLR family, pyrin dom:61 (0.00)      | 52 (0.69)  | 1.85 |
| 11-02 | Gp4 Focus 2 | g.chr19:55493572G>A  | Missense Mutation | NLRP2  | p.R169Q  | NLR family, pyrin dom:45 (0.00)      | 198 (0.56) | 1.48 |
| 11-02 | Gp4 Focus 2 | g.chr10:15161400T>A  | Missense Mutation | NMT2   | p.E371V  | N-myristoyltransferase 2:45 (0.00)   | 38 (0.84)  | 2.82 |
| 11-02 | Gp4 Focus 2 | g.chr2:10811711G>A   | Missense Mutation | NOL10  | p.P145S  | nucleolar protein 10 36 (0.00)       | 21 (0.62)  | 1.65 |
| 11-02 | Gp4 Focus 2 | g.chr9:95076758G>A   | Missense Mutation | NOL8   | p.L717F  | nucleolar protein 8 146 (0.01)       | 34 (0.41)  | 1.10 |
| 11-02 | Gp4 Focus 2 | g.chr9:95081575G>T   | Missense Mutation | NOL8   | p.N115K  | nucleolar protein 8 21 (0.00)        | 25 (0.28)  | 0.75 |
| 11-02 | Gp4 Focus 2 | g.chr10:103920074C>T | Missense Mutation | NOLC1  | p.A358V  | nucleolar and coiled-bo:47 (0.00)    | 22 (0.32)  | 0.85 |
| 11-02 | Gp4 Focus 2 | g.chr16:14969039C>T  | Missense Mutation | NOMO1  | p.T734I  | NODAL modulator 1 96 (0.00)          | 37 (0.16)  | 0.43 |
| 11-02 | Gp4 Focus 2 | g.chr16:18542861C>A  | Silent            | NOMO2  | p.V488V  | NODAL modulator 2 48 (0.00)          | 13 (0.92)  | 2.46 |
| 11-02 | Gp4 Focus 2 | g.chr16:18555027C>T  | Missense Mutation | NOMO2  | p.G216D  | NODAL modulator 2 27 (0.00)          | 10 (0.70)  | 1.87 |
| 11-02 | Gp4 Focus 2 | g.chr16:16367889G>A  | Silent            | NOMO3  | p.E771E  | NODAL modulator 3 91 (0.00)          | 16 (0.31)  | 0.83 |
| 11-02 | Gp4 Focus 2 | g.chr12:6669280G>A   | Silent            | NOP2   | p.I587I  | NOP2 nucleolar protein 20 (0.00)     | 24 (0.62)  | 1.67 |
| 11-02 | Gp4 Focus 2 | g.chr12:117660643C>T | Silent            | NOS1   | p.L1318L | nitric oxide synthase 1 (:26 (0.00)  | 13 (0.38)  | 1.03 |
| 11-02 | Gp4 Focus 2 | g.chr12:117681124G>A | Silent            | NOS1   | p.A1014A | nitric oxide synthase 1 (:22 (0.00)  | 35 (0.40)  | 1.07 |
| 11-02 | Gp4 Focus 2 | g.chr12:117723988G>A | Missense Mutation | NOS1   | p.T404I  | nitric oxide synthase 1 (:17 (0.00)  | 28 (0.32)  | 0.86 |
| 11-02 | Gp4 Focus 2 | g.chr17:26084353G>A  | Silent            | NOS2   | p.I1127I | nitric oxide synthase 2, i:31 (0.00) | 14 (0.43)  | 1.14 |
| 11-02 | Gp4 Focus 2 | g.chr11:89135609G>A  | Missense Mutation | NOX4   | p.S244L  | NADPH oxidase 4 54 (0.00)            | 15 (0.53)  | 1.42 |
| 11-02 | Gp4 Focus 2 | g.chr11:108031948C>T | Missense Mutation | NPAT   | p.A1289T | nuclear protein, ataxia-t:70 (0.00)  | 23 (0.26)  | 0.70 |
| 11-02 | Gp4 Focus 2 | g.chr17:45662983G>A  | Missense Mutation | NPEPPS | p.V256I  | aminopeptidase puromy 127 (0.00)     | 35 (0.17)  | 0.46 |
| 11-02 | Gp4 Focus 2 | g.chr17:45681352C>T  | Silent            | NPEPPS | p.G604G  | aminopeptidase puromy 98 (0.00)      | 28 (0.57)  | 1.52 |
| 11-02 | Gp4 Focus 2 | g.chr3:132407595A>T  | Nonsense Mutation | NPHP3  | p.Y1008* | nephronophthisis 3 (ado 123 (0.00)   | 11 (0.82)  | 2.18 |
| 11-02 | Gp4 Focus 2 | g.chr3:132407598C>T  | Silent            | NPHP3  | p.L1007L | nephronophthisis 3 (ado 119 (0.00)   | 11 (0.82)  | 2.18 |
| 11-02 | Gp4 Focus 2 | g.chr19:36321827G>A  | Silent            | NPHS1  | p.F1171F | nephrosis 1, congenital, 30 (0.00)   | 33 (0.36)  | 0.97 |
| 11-02 | Gp4 Focus 2 | g.chr17:79564334C>T  | Nonsense Mutation | NPLOC4 | p.W310*  | nuclear protein localizat 28 (0.00)  | 45 (0.16)  | 0.41 |
| 11-02 | Gp4 Focus 2 | g.chr17:79564342C>T  | Splice Site       | NPLOC4 | p.V308I  | nuclear protein localizat 28 (0.00)  | 45 (0.16)  | 0.41 |
| 11-02 | Gp4 Focus 2 | g.chr9:35792984C>T   | Silent            | NPR2   | p.G193G  | natriuretic peptide recep 19 (0.00)  | 23 (0.22)  | 0.58 |
| 11-02 | Gp4 Focus 2 | g.chr15:73884326C>T  | Missense Mutation | NPTN   | p.A198T  | neuroplastin 44 (0.00)               | 65 (0.15)  | 0.41 |
| 11-02 | Gp4 Focus 2 | g.chr15:73889560C>T  | Missense Mutation | NPTN   | p.G81D   | neuroplastin 15 (0.00)               | 41 (0.17)  | 0.46 |
| 11-02 | Gp4 Focus 2 | g.chr16:69747007G>A  | Missense Mutation | NQO1   | p.T110I  | NAD(P)H dehydrogena:59 (0.00)        | 76 (0.26)  | 0.70 |
| 11-02 | Gp4 Focus 2 | g.chr19:50881479G>A  | Silent            | NR1H2  | p.E85E   | nuclear receptor subfam 62 (0.00)    | 44 (0.16)  | 0.42 |
| 11-02 | Gp4 Focus 2 | g.chr11:47283484G>T  | Missense Mutation | NR1H3  | p.E301D  | nuclear receptor subfam 56 (0.00)    | 40 (0.20)  | 0.53 |
| 11-02 | Gp4 Focus 2 | g.chr14:90769367G>T  | Missense Mutation | NRDE2  | p.L370M  | NRDE-2, necessary for 84 (0.00)      | 26 (0.23)  | 0.62 |
| 11-02 | Gp4 Focus 2 | g.chrX:105153784C>G  | Silent            | NRK    | p.L717L  | Nik related kinase 24 (0.00)         | 23 (0.26)  | 0.58 |

|       |             |                      |                   |         |          |                           |            |           |      |
|-------|-------------|----------------------|-------------------|---------|----------|---------------------------|------------|-----------|------|
| 11-02 | Gp4 Focus 2 | g.chr2:206628431G>A  | Missense Mutation | NRP2    | p.S693N  | neuropilin 2              | 27 (0.00)  | 23 (0.22) | 0.58 |
| 11-02 | Gp4 Focus 2 | g.chr2:50758545C>T   | Missense Mutation | NRXN1   | p.G763R  | neurexin 1                | 25 (0.00)  | 38 (0.16) | 0.42 |
| 11-02 | Gp4 Focus 2 | g.chr2:50765519C>T   | Missense Mutation | NRXN1   | p.C712Y  | neurexin 1                | 178 (0.00) | 10 (0.60) | 1.60 |
| 11-02 | Gp4 Focus 2 | g.chr14:80328019G>A  | Silent            | NRXN3   | p.E966E  | neurexin 3                | 51 (0.00)  | 51 (0.49) | 1.31 |
| 11-02 | Gp4 Focus 2 | g.chr5:176694637G>A  | Missense Mutation | NSD1    | p.G1741R | nuclear receptor binding  | 64 (0.00)  | 24 (0.38) | 1.00 |
| 11-02 | Gp4 Focus 2 | g.chr7:75044486C>A   | RNA               | NSUN5P1 |          | NOP2/Sun domain fami      | 37 (0.00)  | 30 (0.47) | 2.02 |
| 11-02 | Gp4 Focus 2 | g.chr12:104182632C>T | Missense Mutation | NT5DC3  | p.G362D  | 5'-nucleotidase domain    | 101 (0.00) | 43 (0.40) | 1.05 |
| 11-02 | Gp4 Focus 2 | g.chr12:96076591C>T  | Missense Mutation | NTN4    | p.D468N  | netrin 4                  | 18 (0.00)  | 14 (0.36) | 0.95 |
| 11-02 | Gp4 Focus 2 | g.chr9:87635180G>A   | Silent            | NTRK2   | p.R728R  | neurotrophic tyrosine ki  | 26 (0.00)  | 12 (0.42) | 1.34 |
| 11-02 | Gp4 Focus 2 | g.chr12:106466615C>T | Missense Mutation | NUAK1   | p.D196N  | NUAK family, SNF1-lil     | 29 (0.00)  | 21 (0.24) | 0.63 |
| 11-02 | Gp4 Focus 2 | g.chr1:205274382C>G  | Missense Mutation | NUAK2   | p.K256N  | NUAK family, SNF1-lil     | 20 (0.00)  | 11 (0.82) | 2.18 |
| 11-02 | Gp4 Focus 2 | g.chr10:74890509G>A  | Missense Mutation | NUDT13  | p.D303N  | nudix (nucleoside diphos  | 34 (0.00)  | 22 (0.77) | 2.06 |
| 11-02 | Gp4 Focus 2 | g.chr10:12215801C>T  | Missense Mutation | NUDT5   | p.D101N  | nudix (nucleoside diphos  | 20 (0.00)  | 28 (0.18) | 0.60 |
| 11-02 | Gp4 Focus 2 | g.chr11:71724189G>A  | Silent            | NUMA1   | p.L1454L | nuclear mitotic apparatus | 70 (0.00)  | 46 (0.30) | 0.81 |
| 11-02 | Gp4 Focus 2 | g.chr12:69115705C>T  | Nonsense Mutation | NUP107  | p.Q437*  | nucleoporin 107kDa        | 35 (0.00)  | 20 (0.30) | 0.80 |
| 11-02 | Gp4 Focus 2 | g.chr6:17626364G>A   | Silent            | NUP153  | p.F1192F | nucleoporin 153kDa        | 25 (0.00)  | 23 (0.22) | 0.84 |
| 11-02 | Gp4 Focus 2 | g.chr6:17675891G>A   | Nonsense Mutation | NUP153  | p.Q149*  | nucleoporin 153kDa        | 103 (0.00) | 25 (0.40) | 1.55 |
| 11-02 | Gp4 Focus 2 | g.chr6:17675907G>A   | Silent            | NUP153  | p.S143S  | nucleoporin 153kDa        | 109 (0.00) | 27 (0.30) | 1.15 |
| 11-02 | Gp4 Focus 2 | g.chr6:17675929A>G   | Missense Mutation | NUP153  | p.L136P  | nucleoporin 153kDa        | 110 (0.00) | 25 (0.24) | 0.93 |
| 11-02 | Gp4 Focus 2 | g.chr9:131768593G>A  | Silent            | NUP188  | p.P1673P | nucleoporin 188kDa        | 17 (0.00)  | 23 (0.39) | 1.04 |
| 11-02 | Gp4 Focus 2 | g.chr7:135272405C>T  | Missense Mutation | NUP205  | p.S434L  | nucleoporin 205kDa        | 58 (0.00)  | 45 (0.22) | 0.59 |
| 11-02 | Gp4 Focus 2 | g.chr1:153984805G>A  | Silent            | NUP210L | p.D1565D | nucleoporin 210kDa-like   | 41 (0.00)  | 26 (0.23) | 0.62 |
| 11-02 | Gp4 Focus 2 | g.chr19:50412824G>A  | Missense Mutation | NUP62   | p.L81F   | nucleoporin 62kDa         | 16 (0.00)  | 35 (0.57) | 1.52 |
| 11-02 | Gp4 Focus 2 | g.chrX:106418357G>A  | Missense Mutation | NUP62CL | p.S7L    | nucleoporin 62kDa C-te    | 70 (0.00)  | 52 (0.19) | 0.43 |
| 11-02 | Gp4 Focus 2 | g.chr17:73230854G>A  | Missense Mutation | NUP85   | p.D535N  | nucleoporin 85kDa         | 22 (0.00)  | 18 (0.28) | 0.74 |
| 11-02 | Gp4 Focus 2 | g.chr16:56864440G>A  | Splice Site       | NUP93   | p.D310N  | nucleoporin 93kDa         | 81 (0.00)  | 58 (0.21) | 0.55 |
| 11-02 | Gp4 Focus 2 | g.chr13:25895207C>A  | Missense Mutation | NUPL1   | p.D297E  | nucleoporin like 1        | 68 (0.00)  | 23 (0.57) | 1.51 |
| 11-02 | Gp4 Focus 2 | g.chr15:34646911C>A  | Missense Mutation | NUTM1   | p.S447Y  | NUT midline carcinoma     | 30 (0.00)  | 56 (0.21) | 0.57 |
| 11-02 | Gp4 Focus 2 | g.chr10:89118070C>T  | Silent            | NUTM2D  | p.D16D   | NUT family member 2E      | 23 (0.00)  | 22 (0.32) | 0.85 |
| 11-02 | Gp4 Focus 2 | g.chr11:62560116G>C  | Silent            | NXF1    | p.L606L  | nuclear RNA export fac    | 49 (0.00)  | 28 (0.18) | 0.48 |
| 11-02 | Gp4 Focus 2 | g.chr12:113445566G>A | Silent            | OAS2    | p.L571L  | 2'-5'-oligoadenylate syn  | 48 (0.00)  | 37 (0.30) | 0.79 |
| 11-02 | Gp4 Focus 2 | g.chr12:113388699G>A | Missense Mutation | OAS3    | p.E526K  | 2'-5'-oligoadenylate syn  | 35 (0.00)  | 23 (0.26) | 0.70 |
| 11-02 | Gp4 Focus 2 | g.chr12:113400543G>T | Missense Mutation | OAS3    | p.W640C  | 2'-5'-oligoadenylate syn  | 63 (0.00)  | 64 (0.53) | 1.42 |
| 11-02 | Gp4 Focus 2 | g.chr1:228432250C>T  | Silent            | OBSCN   | p.V1245V | obscurin, cytoskeletal c  | 20 (0.00)  | 31 (0.19) | 0.52 |
| 11-02 | Gp4 Focus 2 | g.chr1:228456235C>T  | Silent            | OBSCN   | p.P1806P | obscurin, cytoskeletal c  | 28 (0.00)  | 20 (0.40) | 1.07 |

|       |             |                      |                   |        |          |                           |            |           |      |
|-------|-------------|----------------------|-------------------|--------|----------|---------------------------|------------|-----------|------|
| 11-02 | Gp4 Focus 2 | g.chr1:228486398C>T  | Missense Mutation | OBSCN  | p.S4397L | obscurin, cytoskeletal c  | 32 (0.00)  | 17 (0.41) | 1.10 |
| 11-02 | Gp4 Focus 2 | g.chrX:128692824C>T  | Missense Mutation | OCRL   | p.R190C  | oculocerebrorenal syndr   | 19 (0.00)  | 12 (0.50) | 1.06 |
| 11-02 | Gp4 Focus 2 | g.chrX:128695198T>C  | Silent            | OCRL   | p.F289F  | oculocerebrorenal syndr   | 20 (0.00)  | 28 (0.68) | 1.44 |
| 11-02 | Gp4 Focus 2 | g.chr10:74671513C>T  | Missense Mutation | OIT3   | p.H236Y  | oncoprotein induced tra   | 56 (0.00)  | 13 (0.38) | 1.03 |
| 11-02 | Gp4 Focus 2 | g.chr9:138011925C>T  | Silent            | OLFM1  | p.D426D  | olfactomedin 1            | 37 (0.00)  | 14 (0.57) | 1.52 |
| 11-02 | Gp4 Focus 2 | g.chr1:102269966G>C  | Missense Mutation | OLFM3  | p.T422S  | olfactomedin 3            | 51 (0.00)  | 41 (0.15) | 0.39 |
| 11-02 | Gp4 Focus 2 | g.chr13:53616225A>G  | Missense Mutation | OLFM4  | p.S180G  | olfactomedin 4            | 31 (0.00)  | 28 (0.29) | 0.76 |
| 11-02 | Gp4 Focus 2 | g.chr13:53624517G>A  | Missense Mutation | OLFM4  | p.D382N  | olfactomedin 4            | 64 (0.00)  | 28 (0.25) | 0.67 |
| 11-02 | Gp4 Focus 2 | g.chr1:114524270G>A  | Missense Mutation | OLFML3 | p.R367H  | olfactomedin-like 3       | 19 (0.00)  | 24 (0.33) | 0.70 |
| 11-02 | Gp4 Focus 2 | g.chr3:193380743C>T  | Missense Mutation | OPA1   | p.P830S  | optic atrophy 1 (autoson  | 55 (0.00)  | 25 (0.24) | 0.64 |
| 11-02 | Gp4 Focus 2 | g.chrX:153416182C>G  | Missense Mutation | OPN1LW | p.T56S   | opsin 1 (cone pigments)   | 17 (0.00)  | 11 (0.64) | 1.06 |
| 11-02 | Gp4 Focus 2 | g.chr6:47776081C>G   | Missense Mutation | OPN5   | p.C316W  | opsin 5                   | 82 (0.00)  | 13 (0.38) | 1.03 |
| 11-02 | Gp4 Focus 2 | g.chr1:158435839T>A  | Missense Mutation | OR10K1 | p.V163E  | olfactory receptor, famil | 34 (0.00)  | 31 (0.32) | 0.86 |
| 11-02 | Gp4 Focus 2 | g.chr11:57971265G>A  | Missense Mutation | OR1S2  | p.T130I  | olfactory receptor, famil | 88 (0.00)  | 17 (0.29) | 0.78 |
| 11-02 | Gp4 Focus 2 | g.chr12:55968784G>A  | Missense Mutation | OR2AP1 | p.V196I  | olfactory receptor, famil | 47 (0.00)  | 13 (0.38) | 1.03 |
| 11-02 | Gp4 Focus 2 | g.chr11:74800742C>T  | Missense Mutation | OR2AT4 | p.C6Y    | olfactory receptor, famil | 37 (0.00)  | 12 (0.42) | 1.11 |
| 11-02 | Gp4 Focus 2 | g.chr6:27925710C>T   | Missense Mutation | OR2B6  | p.A231V  | olfactory receptor, famil | 118 (0.00) | 31 (0.26) | 0.69 |
| 11-02 | Gp4 Focus 2 | g.chr6:27925795C>T   | Silent            | OR2B6  | p.Y259Y  | olfactory receptor, famil | 39 (0.00)  | 33 (0.27) | 0.73 |
| 11-02 | Gp4 Focus 2 | g.chr7:143657503C>T  | Missense Mutation | OR2F1  | p.T147I  | olfactory receptor, famil | 27 (0.00)  | 34 (0.35) | 0.94 |
| 11-02 | Gp4 Focus 2 | g.chr1:248685767G>A  | Missense Mutation | OR2G6  | p.V274I  | olfactory receptor, famil | 42 (0.00)  | 23 (0.22) | 0.58 |
| 11-02 | Gp4 Focus 2 | g.chr1:248616173C>T  | Silent            | OR2T2  | p.P25P   | olfactory receptor, famil | 111 (0.00) | 32 (0.28) | 0.75 |
| 11-02 | Gp4 Focus 2 | g.chr1:248637071G>A  | Silent            | OR2T3  | p.L140L  | olfactory receptor, famil | 52 (0.00)  | 10 (0.70) | 1.87 |
| 11-02 | Gp4 Focus 2 | g.chr1:248525410G>A  | Silent            | OR2T4  | p.L176L  | olfactory receptor, famil | 50 (0.00)  | 40 (0.20) | 0.53 |
| 11-02 | Gp4 Focus 2 | g.chr5:180166819C>T  | Silent            | OR2Y1  | p.Q80Q   | olfactory receptor, famil | 16 (0.00)  | 23 (0.48) | 1.28 |
| 11-02 | Gp4 Focus 2 | g.chr17:3195121G>A   | Silent            | OR3A1  | p.A252A  | olfactory receptor, famil | 74 (0.00)  | 19 (0.32) | 0.84 |
| 11-02 | Gp4 Focus 2 | g.chr17:3195136G>A   | Silent            | OR3A1  | p.H247H  | olfactory receptor, famil | 67 (0.00)  | 31 (0.26) | 0.69 |
| 11-02 | Gp4 Focus 2 | g.chr17:3195427C>T   | Silent            | OR3A1  | p.A150A  | olfactory receptor, famil | 17 (0.00)  | 47 (0.32) | 0.85 |
| 11-02 | Gp4 Focus 2 | g.chr17:56247586T>A  | Silent            | OR4D2  | p.T190T  | olfactory receptor, famil | 24 (0.00)  | 20 (0.45) | 1.20 |
| 11-02 | Gp4 Focus 2 | g.chr15:102346093C>T | Silent            | OR4F6  | p.S57S   | olfactory receptor, famil | 45 (0.00)  | 75 (0.19) | 0.50 |
| 11-02 | Gp4 Focus 2 | g.chr15:102346198C>T | Silent            | OR4F6  | p.I92I   | olfactory receptor, famil | 61 (0.00)  | 27 (0.37) | 0.99 |
| 11-02 | Gp4 Focus 2 | g.chr14:20585714G>A  | Missense Mutation | OR4K17 | p.S50N   | olfactory receptor, famil | 77 (0.00)  | 32 (0.44) | 0.64 |
| 11-02 | Gp4 Focus 2 | g.chr11:4967754C>T   | Missense Mutation | OR51A4 | p.D193N  | olfactory receptor, famil | 64 (0.00)  | 12 (0.42) | 1.11 |
| 11-02 | Gp4 Focus 2 | g.chr11:4929313T>A   | Missense Mutation | OR51A7 | p.N238K  | olfactory receptor, famil | 48 (0.00)  | 14 (0.43) | 1.14 |
| 11-02 | Gp4 Focus 2 | g.chr11:5364106C>T   | Missense Mutation | OR51B5 | p.V217M  | olfactory receptor, famil | 75 (0.00)  | 51 (0.18) | 0.47 |
| 11-02 | Gp4 Focus 2 | g.chr11:5410691C>T   | Silent            | OR51M1 | p.S21S   | olfactory receptor, famil | 200 (0.01) | 18 (0.33) | 0.89 |

|       |             |                      |                   |            |          |                                     |           |      |
|-------|-------------|----------------------|-------------------|------------|----------|-------------------------------------|-----------|------|
| 11-02 | Gp4 Focus 2 | g.chr11:4615851G>A   | Missense Mutation | OR52I1     | p.D195N  | olfactory receptor, famil168 (0.01) | 98 (0.22) | 0.60 |
| 11-02 | Gp4 Focus 2 | g.chr11:6007404G>A   | Missense Mutation | OR52L1     | p.L253F  | olfactory receptor, famil27 (0.00)  | 13 (0.46) | 1.23 |
| 11-02 | Gp4 Focus 2 | g.chr11:5968813C>G   | Silent            | OR56A3     | p.L79L   | olfactory receptor, famil32 (0.00)  | 58 (0.19) | 0.51 |
| 11-02 | Gp4 Focus 2 | g.chr11:55579011G>A  | Silent            | OR5L1      | p.L23L   | olfactory receptor, famil16 (0.00)  | 22 (0.36) | 0.97 |
| 11-02 | Gp4 Focus 2 | g.chr11:56380440G>A  | Missense Mutation | OR5M1      | p.A180V  | olfactory receptor, famil52 (0.02)  | 30 (0.33) | 0.89 |
| 11-02 | Gp4 Focus 2 | g.chr11:7847281A>G   | Missense Mutation | OR5P3      | p.V80A   | olfactory receptor, famil26 (0.00)  | 40 (0.15) | 0.40 |
| 11-02 | Gp4 Focus 2 | g.chr11:56185234G>T  | Missense Mutation | OR5R1      | p.H159N  | olfactory receptor, famil34 (0.00)  | 40 (0.33) | 0.87 |
| 11-02 | Gp4 Focus 2 | g.chr11:56185487G>A  | Silent            | OR5R1      | p.S74S   | olfactory receptor, famil17 (0.00)  | 19 (0.47) | 1.26 |
| 11-02 | Gp4 Focus 2 | g.chr12:55945190C>T  | Silent            | OR6C4      | p.F60F   | olfactory receptor, famil55 (0.00)  | 28 (0.18) | 0.48 |
| 11-02 | Gp4 Focus 2 | g.chr12:55863289C>T  | Missense Mutation | OR6C70     | p.V212I  | olfactory receptor, famil40 (0.00)  | 17 (0.35) | 0.94 |
| 11-02 | Gp4 Focus 2 | g.chr11:123814474C>T | Silent            | OR6T1      | p.Q24Q   | olfactory receptor, famil44 (0.00)  | 73 (0.21) | 0.55 |
| 11-02 | Gp4 Focus 2 | g.chr11:123624723G>A | Silent            | OR6X1      | p.G168G  | olfactory receptor, famil22 (0.00)  | 45 (0.51) | 1.36 |
| 11-02 | Gp4 Focus 2 | g.chr19:9362138G>A   | Missense Mutation | OR7E24     | p.R140Q  | olfactory receptor, famil35 (0.00)  | 18 (0.33) | 0.89 |
| 11-02 | Gp4 Focus 2 | g.chr11:124120684G>A | RNA               | OR8G1      |          | olfactory receptor, famil80 (0.00)  | 33 (0.61) | 1.62 |
| 11-02 | Gp4 Focus 2 | g.chr11:56468248C>T  | Silent            | OR9G1      | p.L129L  | olfactory receptor, famil55 (0.00)  | 35 (0.20) | 0.53 |
| 11-02 | Gp4 Focus 2 | g.chr11:56511240C>T  | Missense Mutation | OR9G4      | p.M16I   | olfactory receptor, famil35 (0.00)  | 40 (0.15) | 0.40 |
| 11-02 | Gp4 Focus 2 | g.chr12:58112175G>A  | Missense Mutation | OS9        | p.E429K  | osteosarcoma amplified 16 (0.00)    | 61 (0.18) | 0.48 |
| 11-02 | Gp4 Focus 2 | g.chr7:24870402C>T   | Silent            | OSBPL3     | p.Q623Q  | oxysterol binding protei 85 (0.00)  | 36 (0.81) | 2.15 |
| 11-02 | Gp4 Focus 2 | g.chr7:24874187G>A   | Missense Mutation | OSBPL3     | p.T555M  | oxysterol binding protei 27 (0.00)  | 35 (0.31) | 0.84 |
| 11-02 | Gp4 Focus 2 | g.chr5:38924630G>A   | Silent            | OSMR       | p.G659G  | oncostatin M receptor 54 (0.00)     | 20 (0.40) | 1.07 |
| 11-02 | Gp4 Focus 2 | g.chr8:99961735C>T   | Silent            | OSR2       | p.Y185Y  | odd-skipped related tran 43 (0.00)  | 10 (0.90) | 2.40 |
| 11-02 | Gp4 Focus 2 | g.chr6:159263138G>A  | RNA               | OSTCP1     |          | oligosaccharyltransferas 56 (0.00)  | 20 (0.35) | 0.93 |
| 11-02 | Gp4 Focus 2 | g.chr16:21737853C>T  | Silent            | OTOA       | p.Y630Y  | otoancorin 29 (0.00)                | 27 (0.30) | 0.79 |
| 11-02 | Gp4 Focus 2 | g.chr1:149920888G>C  | Missense Mutation | OTUD7B     | p.D407E  | OTU deubiquitinase 7B 38 (0.00)     | 40 (0.23) | 0.60 |
| 11-02 | Gp4 Focus 2 | g.chr12:29597141A>T  | Missense Mutation | OVCH1      | p.V985D  | ovochoymase 1 72 (0.00)             | 17 (0.35) | 0.94 |
| 11-02 | Gp4 Focus 2 | g.chr12:29597148C>T  | Missense Mutation | OVCH1      | p.E983K  | ovochoymase 1 62 (0.02)             | 15 (0.33) | 0.89 |
| 11-02 | Gp4 Focus 2 | g.chr5:131546035G>A  | Silent            | P4HA2      | p.V217V  | prolyl 4-hydroxylase, al 34 (0.00)  | 17 (0.35) | 0.94 |
| 11-02 | Gp4 Focus 2 | g.chr17:79804877G>A  | Silent            | P4HB       | p.D223D  | prolyl 4-hydroxylase, be 31 (0.00)  | 61 (0.20) | 0.52 |
| 11-02 | Gp4 Focus 2 | g.chr1:17708676C>T   | RNA               | PADI6      |          | peptidyl arginine deimir 17 (0.00)  | 26 (0.19) | 0.51 |
| 11-02 | Gp4 Focus 2 | g.chr12:103237545C>G | Missense Mutation | PAH        | p.E355Q  | phenylalanine hydroxyl: 20 (0.00)   | 16 (0.56) | 1.50 |
| 11-02 | Gp4 Focus 2 | g.chr9:112898583C>A  | Silent            | PALM2-AKAI | p.P253P  | PALM2-AKAP2 readth: 30 (0.00)       | 42 (0.14) | 0.38 |
| 11-02 | Gp4 Focus 2 | g.chr1:100154547G>A  | Missense Mutation | PALMD      | p.R244K  | palmdelphin 57 (0.00)               | 29 (0.41) | 1.10 |
| 11-02 | Gp4 Focus 2 | g.chr7:4899770G>A    | Missense Mutation | PAPOLB     | p.P557S  | poly(A) polymerase bet: 26 (0.00)   | 19 (0.26) | 0.94 |
| 11-02 | Gp4 Focus 2 | g.chr2:60995679C>G   | Missense Mutation | PAPOLG     | p.H107Q  | poly(A) polymerase gan 29 (0.00)    | 21 (0.33) | 0.89 |
| 11-02 | Gp4 Focus 2 | g.chr1:176709195C>T  | Silent            | PAPPA2     | p.T1338T | pappalysin 2 88 (0.00)              | 22 (0.27) | 0.73 |

|       |             |                     |                   |          |          |                           |             |           |      |
|-------|-------------|---------------------|-------------------|----------|----------|---------------------------|-------------|-----------|------|
| 11-02 | Gp4 Focus 2 | g.chr16:14576514G>A | Missense Mutation | PARN     | p.H551Y  | poly(A)-specific ribonuc  | 156 (0.00)  | 50 (0.36) | 1.15 |
| 11-02 | Gp4 Focus 2 | g.chr7:139724537C>T | Nonsense Mutation | PARP12   | p.W643*  | poly (ADP-ribose) poly    | 123 (0.00)  | 38 (0.18) | 0.49 |
| 11-02 | Gp4 Focus 2 | g.chr3:122419776G>A | Missense Mutation | PARP14   | p.C792Y  | poly (ADP-ribose) poly    | 160 (0.00)  | 36 (0.22) | 0.59 |
| 11-02 | Gp4 Focus 2 | g.chr14:20825837G>A | Missense Mutation | PARP2    | p.G532R  | poly (ADP-ribose) poly    | 174 (0.00)  | 16 (0.50) | 0.73 |
| 11-02 | Gp4 Focus 2 | g.chr13:25030552G>A | Missense Mutation | PARP4    | p.S830F  | poly (ADP-ribose) poly    | 169 (0.00)  | 33 (0.21) | 0.57 |
| 11-02 | Gp4 Focus 2 | g.chr9:37020732C>T  | Missense Mutation | PAX5     | p.R38H   | paired box 5              | 35 (0.00)   | 35 (0.14) | 0.38 |
| 11-02 | Gp4 Focus 2 | g.chr3:52649381G>A  | Missense Mutation | PBRM1    | p.P652L  | polybromo 1               | 40 (0.00)   | 29 (0.21) | 0.55 |
| 11-02 | Gp4 Focus 2 | g.chr3:52649426C>T  | Missense Mutation | PBRM1    | p.R637K  | polybromo 1               | 37 (0.00)   | 28 (0.18) | 0.48 |
| 11-02 | Gp4 Focus 2 | g.chr1:154923964C>T | Missense Mutation | PBXIP1   | p.E76K   | pre-B-cell leukemia hon   | 28 (0.00)   | 36 (0.17) | 0.44 |
| 11-02 | Gp4 Focus 2 | g.chr4:134071365G>A | Missense Mutation | PCDH10   | p.V24I   | protocadherin 10          | 17 (0.00)   | 18 (0.33) | 1.52 |
| 11-02 | Gp4 Focus 2 | g.chr4:134072821G>T | Missense Mutation | PCDH10   | p.G509V  | protocadherin 10          | 36 (0.00)   | 30 (0.17) | 0.76 |
| 11-02 | Gp4 Focus 2 | g.chr4:138451329G>A | Silent            | PCDH18   | p.I418I  | protocadherin 18          | 68 (0.00)   | 22 (0.55) | 2.49 |
| 11-02 | Gp4 Focus 2 | g.chr13:61985781G>A | Silent            | PCDH20   | p.L817L  | protocadherin 20          | 29 (0.00)   | 24 (0.33) | 1.72 |
| 11-02 | Gp4 Focus 2 | g.chr5:140186827C>T | Missense Mutation | PCDHA4   | p.L19F   | protocadherin alpha 4     | 24 (0.00)   | 31 (0.16) | 0.43 |
| 11-02 | Gp4 Focus 2 | g.chr5:140208503C>G | Missense Mutation | PCDHA6   | p.A276G  | protocadherin alpha 6     | 31 (0.00)   | 17 (0.29) | 0.78 |
| 11-02 | Gp4 Focus 2 | g.chr5:140230345G>A | Silent            | PCDHA9   | p.R755R  | protocadherin alpha 9     | 25 (0.00)   | 23 (0.57) | 1.51 |
| 11-02 | Gp4 Focus 2 | g.chr5:140594357C>T | Missense Mutation | PCDHB13  | p.P221L  | protocadherin beta 13     | 36 (0.00)   | 31 (0.16) | 0.43 |
| 11-02 | Gp4 Focus 2 | g.chr5:140474536G>A | Silent            | PCDHB2   | p.L54L   | protocadherin beta 2      | 30 (0.00)   | 20 (0.25) | 0.67 |
| 11-02 | Gp4 Focus 2 | g.chr5:140501756C>T | Missense Mutation | PCDHB4   | p.A59V   | protocadherin beta 4      | 20 (0.00)   | 36 (0.39) | 1.04 |
| 11-02 | Gp4 Focus 2 | g.chr5:140501785G>A | Missense Mutation | PCDHB4   | p.D69N   | protocadherin beta 4      | 25 (0.00)   | 40 (0.25) | 0.67 |
| 11-02 | Gp4 Focus 2 | g.chr5:140802291G>A | Silent            | PCDHGA11 | p.G499G  | protocadherin gamma st    | 32 (0.00)   | 63 (0.17) | 0.47 |
| 11-02 | Gp4 Focus 2 | g.chr5:140736263C>T | Missense Mutation | PCDHGA4  | p.A499V  | protocadherin gamma st    | 30 (0.00)   | 12 (0.50) | 1.33 |
| 11-02 | Gp4 Focus 2 | g.chr5:140769629G>A | Silent            | PCDHGB4  | p.Q726Q  | protocadherin gamma st    | 60 (0.00)   | 39 (0.56) | 1.50 |
| 11-02 | Gp4 Focus 2 | g.chr5:140855953C>T | Silent            | PCDHGC3  | p.D90D   | protocadherin gamma st    | 31 (0.00)   | 23 (0.26) | 0.70 |
| 11-02 | Gp4 Focus 2 | g.chr5:140869099G>A | Missense Mutation | PCDHGC5  | p.A98T   | protocadherin gamma st    | 21 (0.00)   | 41 (0.17) | 0.46 |
| 11-02 | Gp4 Focus 2 | g.chr20:2816916C>T  | Missense Mutation | PCED1A   | p.G296R  | PC-esterase domain con    | 22 (0.00)   | 33 (0.21) | 0.57 |
| 11-02 | Gp4 Focus 2 | g.chr11:82879527G>A | Missense Mutation | PCF11    | p.R717Q  | PCF11 cleavage and pol    | 53 (0.00)   | 21 (0.43) | 1.14 |
| 11-02 | Gp4 Focus 2 | g.chr11:82879864G>A | Silent            | PCF11    | p.G829G  | PCF11 cleavage and pol    | 18 (0.00)   | 14 (0.36) | 0.95 |
| 11-02 | Gp4 Focus 2 | g.chr11:82893040G>A | Missense Mutation | PCF11    | p.G1438R | PCF11 cleavage and pol    | 49 (0.00)   | 40 (0.20) | 0.53 |
| 11-02 | Gp4 Focus 2 | g.chr10:93011189G>A | Missense Mutation | PCGF5    | p.V156I  | polycomb group ring fin   | 59 (0.00)   | 25 (0.36) | 0.96 |
| 11-02 | Gp4 Focus 2 | g.chr7:82579202G>A  | Nonsense Mutation | PCLO     | p.Q3568* | piccolo presynaptic cyto  | 118 (0.00)  | 29 (0.45) | 1.20 |
| 11-02 | Gp4 Focus 2 | g.chr7:82784432G>A  | Missense Mutation | PCLO     | p.P509S  | piccolo presynaptic cyto  | 53 (0.00)   | 90 (0.32) | 0.86 |
| 11-02 | Gp4 Focus 2 | g.chr7:82784550A>G  | Silent            | PCLO     | p.P469P  | piccolo presynaptic cyto  | 37 (0.00)   | 48 (0.19) | 0.50 |
| 11-02 | Gp4 Focus 2 | g.chr8:17869274G>A  | Missense Mutation | PCM1     | p.D1809N | pericentriolar material   | 1108 (0.00) | 85 (0.14) | 0.38 |
| 11-02 | Gp4 Focus 2 | g.chr8:52733222G>A  | Missense Mutation | PCMTD1   | p.L255F  | protein-L-isoaspartate (I | 53 (0.00)   | 21 (0.24) | 0.80 |

|       |             |                      |                   |         |          |                          |             |           |      |
|-------|-------------|----------------------|-------------------|---------|----------|--------------------------|-------------|-----------|------|
| 11-02 | Gp4 Focus 2 | g.chr21:47783511G>A  | Silent            | PCNT    | p.E757E  | pericentrin              | 36 (0.00)   | 36 (0.19) | 0.52 |
| 11-02 | Gp4 Focus 2 | g.chr14:71445326G>A  | Missense Mutation | PCNX    | p.A758T  | pecanex homolog (Dros    | 56 (0.02)   | 31 (0.16) | 0.43 |
| 11-02 | Gp4 Focus 2 | g.chr14:71524343G>A  | Missense Mutation | PCNX    | p.C1585Y | pecanex homolog (Dros    | 77 (0.00)   | 47 (0.17) | 0.45 |
| 11-02 | Gp4 Focus 2 | g.chr14:60591075C>T  | Missense Mutation | PCNXL4  | p.T729I  | pecanex-like 4 (Drosopl  | 100 (0.01)  | 20 (0.35) | 0.93 |
| 11-02 | Gp4 Focus 2 | g.chr9:78853915T>A   | Nonsense Mutation | PCSK5   | p.C969*  | proprotein convertase st | 26 (0.00)   | 27 (0.37) | 1.19 |
| 11-02 | Gp4 Focus 2 | g.chr9:78942924G>A   | Splice Site       | PCSK5   |          | proprotein convertase st | 64 (0.00)   | 47 (0.34) | 1.10 |
| 11-02 | Gp4 Focus 2 | g.chr1:55524172G>A   | Splice Site       | PCSK9   | p.G452D  | proprotein convertase st | 26 (0.00)   | 32 (0.19) | 0.50 |
| 11-02 | Gp4 Focus 2 | g.chr2:70486596G>A   | Missense Mutation | PCYOX1  | p.G73S   | prenylcysteine oxidase   | 1121 (0.00) | 96 (0.22) | 0.58 |
| 11-02 | Gp4 Focus 2 | g.chr5:148747743C>T  | Silent            | PCYOX1L | p.V337V  | prenylcysteine oxidase   | 1115 (0.00) | 47 (0.23) | 0.62 |
| 11-02 | Gp4 Focus 2 | g.chr10:105166400C>T | Silent            | PDCD11  | p.C241C  | programmed cell death    | 140 (0.00)  | 23 (0.43) | 1.16 |
| 11-02 | Gp4 Focus 2 | g.chr10:105199579A>G | Missense Mutation | PDCD11  | p.N1368D | programmed cell death    | 124 (0.00)  | 24 (0.25) | 0.67 |
| 11-02 | Gp4 Focus 2 | g.chr15:65421478C>T  | Missense Mutation | PDCD7   | p.V301I  | programmed cell death    | 1106 (0.00) | 29 (0.17) | 0.46 |
| 11-02 | Gp4 Focus 2 | g.chr11:14852369G>A  | Missense Mutation | PDE3B   | p.A594T  | phosphodiesterase 3B, c  | 30 (0.03)   | 16 (0.38) | 1.00 |
| 11-02 | Gp4 Focus 2 | g.chr5:59284514C>T   | Missense Mutation | PDE4D   | p.E25K   | phosphodiesterase 4D, c  | 112 (0.00)  | 15 (0.33) | 1.11 |
| 11-02 | Gp4 Focus 2 | g.chr1:144917636G>A  | Splice Site       | PDE4DIP | p.R627W  | phosphodiesterase 4D ir  | 94 (0.00)   | 45 (0.20) | 0.53 |
| 11-02 | Gp4 Focus 2 | g.chr10:95386583G>A  | Nonsense Mutation | PDE6C   | p.W342*  | phosphodiesterase 6C, c  | 25 (0.00)   | 29 (0.17) | 0.46 |
| 11-02 | Gp4 Focus 2 | g.chr5:76621410G>A   | Nonsense Mutation | PDE8B   | p.W149*  | phosphodiesterase 8B     | 70 (0.00)   | 69 (0.36) | 0.97 |
| 11-02 | Gp4 Focus 2 | g.chr11:103780429G>A | Missense Mutation | PDGFD   | p.P369L  | platelet derived growth  | 138 (0.00)  | 20 (0.45) | 1.20 |
| 11-02 | Gp4 Focus 2 | g.chr5:149497220G>A  | Missense Mutation | PDGFRB  | p.A1033V | platelet-derived growth  | 22 (0.00)   | 47 (0.28) | 0.74 |
| 11-02 | Gp4 Focus 2 | g.chr4:96761487C>T   | Silent            | PDHA2   | p.Y62Y   | pyruvate dehydrogenase   | 22 (0.00)   | 17 (0.29) | 1.34 |
| 11-02 | Gp4 Focus 2 | g.chr2:10929899G>A   | Silent            | PDIA6   | p.N324N  | protein disulfide isomer | 26 (0.00)   | 22 (0.23) | 0.61 |
| 11-02 | Gp4 Focus 2 | g.chr16:66918259A>C  | Missense Mutation | PDP2    | p.R24S   | pyruvate dehydrogenase   | 179 (0.00)  | 18 (0.61) | 1.63 |
| 11-02 | Gp4 Focus 2 | g.chr16:70176460C>A  | Silent            | PDPR    | p.L492L  | pyruvate dehydrogenase   | 97 (0.00)   | 26 (0.23) | 0.62 |
| 11-02 | Gp4 Focus 2 | g.chr4:39851209C>T   | Missense Mutation | PDS5A   | p.M1050I | PDS5, regulator of cohe  | 69 (0.00)   | 16 (0.38) | 1.00 |
| 11-02 | Gp4 Focus 2 | g.chr16:15102652C>T  | Missense Mutation | PDXDC1  | p.P199L  | pyridoxal-dependent de   | 67 (0.00)   | 40 (0.20) | 0.53 |
| 11-02 | Gp4 Focus 2 | g.chr16:70016623C>T  | RNA               | PDXDC2P |          | pyridoxal-dependent de   | 84 (0.00)   | 38 (0.34) | 0.91 |
| 11-02 | Gp4 Focus 2 | g.chr16:70044667C>T  | RNA               | PDXDC2P |          | pyridoxal-dependent de   | 28 (0.00)   | 36 (0.28) | 0.74 |
| 11-02 | Gp4 Focus 2 | g.chr17:17480264G>A  | Silent            | PEMT    | p.T21T   | phosphatidylethanolami   | 29 (0.00)   | 16 (0.44) | 1.17 |
| 11-02 | Gp4 Focus 2 | g.chr2:239161614G>A  | Missense Mutation | PER2    | p.A1017V | period circadian clock   | 257 (0.02)  | 67 (0.21) | 0.56 |
| 11-02 | Gp4 Focus 2 | g.chr2:239165579C>T  | Silent            | PER2    | p.K683K  | period circadian clock   | 238 (0.00)  | 56 (0.18) | 0.48 |
| 11-02 | Gp4 Focus 2 | g.chr7:92119140G>A   | Missense Mutation | PEX1    | p.P1118L | peroxisomal biogenesis   | 24 (0.00)   | 12 (0.50) | 1.33 |
| 11-02 | Gp4 Focus 2 | g.chr3:179519699G>A  | Silent            | PEX5L   | p.L600L  | peroxisomal biogenesis   | 53 (0.00)   | 32 (0.22) | 0.58 |
| 11-02 | Gp4 Focus 2 | g.chr6:42932537G>C   | Missense Mutation | PEX6    | p.L933V  | peroxisomal biogenesis   | 33 (0.00)   | 55 (0.18) | 0.48 |
| 11-02 | Gp4 Focus 2 | g.chr6:42933429C>T   | Missense Mutation | PEX6    | p.V821M  | peroxisomal biogenesis   | 64 (0.00)   | 63 (0.19) | 0.51 |
| 11-02 | Gp4 Focus 2 | g.chr6:42933501G>A   | Missense Mutation | PEX6    | p.P797S  | peroxisomal biogenesis   | 19 (0.00)   | 21 (0.52) | 1.40 |

|       |             |                      |                   |         |         |                            |            |           |      |
|-------|-------------|----------------------|-------------------|---------|---------|----------------------------|------------|-----------|------|
| 11-02 | Gp4 Focus 2 | g.chr5:139682644C>T  | Silent            | PFDN1   | p.V5V   | prefoldin subunit 1        | 43 (0.00)  | 45 (0.22) | 0.59 |
| 11-02 | Gp4 Focus 2 | g.chr1:161071864G>A  | Missense Mutation | PFDN2   | p.P88S  | prefoldin subunit 2        | 27 (0.00)  | 15 (0.33) | 0.89 |
| 11-02 | Gp4 Focus 2 | g.chr12:53691849C>T  | Silent            | PFDN5   | p.D56D  | prefoldin subunit 5        | 108 (0.01) | 38 (0.16) | 0.42 |
| 11-02 | Gp4 Focus 2 | g.chr10:3150956G>A   | Missense Mutation | PFKP    | p.G312R | phosphofruktokinase, pl 27 | 0.00       | 28 (0.43) | 1.14 |
| 11-02 | Gp4 Focus 2 | g.chr6:28270023C>T   | Missense Mutation | PGBD1   | p.H798Y | piggyBac transposable e    | 59 (0.00)  | 20 (0.40) | 1.07 |
| 11-02 | Gp4 Focus 2 | g.chr1:64095177G>A   | Missense Mutation | PGM1    | p.G110S | phosphoglucomutase 1       | 29 (0.00)  | 17 (0.59) | 1.57 |
| 11-02 | Gp4 Focus 2 | g.chr15:99512852G>A  | Missense Mutation | PGPEP1L | p.A4V   | pyroglutamyl-peptidase     | 15 (0.00)  | 40 (0.28) | 0.91 |
| 11-02 | Gp4 Focus 2 | g.chr3:169846696G>A  | Missense Mutation | PHC3    | p.P522S | polyhomeotic homolog       | 85 (0.00)  | 91 (0.22) | 0.59 |
| 11-02 | Gp4 Focus 2 | g.chr17:27239702G>C  | Silent            | PHF12   | p.P629P | PHD finger protein 12      | 23 (0.00)  | 26 (0.23) | 0.62 |
| 11-02 | Gp4 Focus 2 | g.chr17:27240985C>T  | Missense Mutation | PHF12   | p.G402E | PHD finger protein 12      | 22 (0.00)  | 18 (0.44) | 1.19 |
| 11-02 | Gp4 Focus 2 | g.chr4:129783000G>A  | Missense Mutation | PHF17   | p.E375K |                            | 23 (0.00)  | 15 (0.40) | 1.07 |
| 11-02 | Gp4 Focus 2 | g.chr9:123625018G>A  | Silent            | PHF19   | p.C326C | PHD finger protein 19      | 34 (0.00)  | 26 (0.19) | 0.40 |
| 11-02 | Gp4 Focus 2 | g.chr9:96425193C>A   | Missense Mutation | PHF2    | p.T568K | PHD finger protein 2       | 50 (0.00)  | 49 (0.35) | 0.93 |
| 11-02 | Gp4 Focus 2 | g.chr8:133816278G>A  | Splice Site       | PHF20L1 |         | PHD finger protein 20-l    | 45 (0.00)  | 14 (0.36) | 0.95 |
| 11-02 | Gp4 Focus 2 | g.chr6:64395639C>T   | Silent            | PHF3    | p.P672P | PHD finger protein 3       | 100 (0.00) | 40 (0.23) | 0.60 |
| 11-02 | Gp4 Focus 2 | g.chr1:120286517G>A  | Missense Mutation | PHGDH   | p.A486T | phosphoglycerate dehyd     | 44 (0.00)  | 34 (0.21) | 0.43 |
| 11-02 | Gp4 Focus 2 | g.chr11:118498721G>T | Missense Mutation | PHLDB1  | p.K394N | pleckstrin homology-lik    | 23 (0.00)  | 21 (0.38) | 1.02 |
| 11-02 | Gp4 Focus 2 | g.chr11:118498796C>T | Silent            | PHLDB1  | p.S419S | pleckstrin homology-lik    | 20 (0.00)  | 22 (0.27) | 0.73 |
| 11-02 | Gp4 Focus 2 | g.chr3:111632233C>T  | Missense Mutation | PHLDB2  | p.S54F  | pleckstrin homology-lik    | 73 (0.00)  | 39 (0.23) | 0.62 |
| 11-02 | Gp4 Focus 2 | g.chr18:60395931G>A  | Intron            | PHLPP1  |         | PH domain and leucine      | 21 (0.00)  | 36 (0.28) | 0.74 |
| 11-02 | Gp4 Focus 2 | g.chr18:60407262G>A  | Intron            | PHLPP1  |         | PH domain and leucine      | 107 (0.00) | 71 (0.38) | 1.01 |
| 11-02 | Gp4 Focus 2 | g.chr18:60409082G>A  | Intron            | PHLPP1  |         | PH domain and leucine      | 199 (0.00) | 95 (0.15) | 0.39 |
| 11-02 | Gp4 Focus 2 | g.chr18:60454726C>A  | Intron            | PHLPP1  |         | PH domain and leucine      | 26 (0.00)  | 20 (0.30) | 0.80 |
| 11-02 | Gp4 Focus 2 | g.chr18:60458006G>T  | Intron            | PHLPP1  |         | PH domain and leucine      | 63 (0.00)  | 19 (0.26) | 0.70 |
| 11-02 | Gp4 Focus 2 | g.chr18:60460680G>A  | Intron            | PHLPP1  |         | PH domain and leucine      | 124 (0.00) | 34 (0.15) | 0.39 |
| 11-02 | Gp4 Focus 2 | g.chr18:60463719G>T  | Intron            | PHLPP1  |         | PH domain and leucine      | 40 (0.00)  | 28 (0.32) | 0.86 |
| 11-02 | Gp4 Focus 2 | g.chr18:60464817G>A  | Intron            | PHLPP1  |         | PH domain and leucine      | 78 (0.00)  | 57 (0.28) | 0.75 |
| 11-02 | Gp4 Focus 2 | g.chr18:60468007G>A  | Intron            | PHLPP1  |         | PH domain and leucine      | 69 (0.00)  | 19 (0.26) | 0.70 |
| 11-02 | Gp4 Focus 2 | g.chr18:60476670A>C  | Intron            | PHLPP1  |         | PH domain and leucine      | 24 (0.00)  | 31 (0.16) | 0.43 |
| 11-02 | Gp4 Focus 2 | g.chr18:60491651C>T  | Intron            | PHLPP1  |         | PH domain and leucine      | 35 (0.00)  | 35 (0.23) | 0.61 |
| 11-02 | Gp4 Focus 2 | g.chr18:60509221G>A  | Intron            | PHLPP1  |         | PH domain and leucine      | 126 (0.00) | 31 (0.16) | 0.43 |
| 11-02 | Gp4 Focus 2 | g.chr18:60512282G>A  | Intron            | PHLPP1  |         | PH domain and leucine      | 54 (0.00)  | 19 (0.68) | 1.82 |
| 11-02 | Gp4 Focus 2 | g.chr18:60549021C>A  | Intron            | PHLPP1  |         | PH domain and leucine      | 21 (0.00)  | 13 (0.46) | 1.23 |
| 11-02 | Gp4 Focus 2 | g.chr18:60549022G>A  | Intron            | PHLPP1  |         | PH domain and leucine      | 21 (0.00)  | 13 (0.46) | 1.23 |
| 11-02 | Gp4 Focus 2 | g.chr18:60549044G>A  | Intron            | PHLPP1  |         | PH domain and leucine      | 23 (0.00)  | 11 (0.45) | 1.21 |



|       |             |                     |                   |         |          |                                  |            |           |      |
|-------|-------------|---------------------|-------------------|---------|----------|----------------------------------|------------|-----------|------|
| 11-02 | Gp4 Focus 2 | g.chr18:60550596G>A | Intron            | PHLPP1  |          | PH domain and leucine            | 62 (0.00)  | 21 (0.38) | 1.02 |
| 11-02 | Gp4 Focus 2 | g.chr18:60551011C>T | Intron            | PHLPP1  |          | PH domain and leucine            | 76 (0.00)  | 19 (0.37) | 0.98 |
| 11-02 | Gp4 Focus 2 | g.chr18:60553540G>T | Intron            | PHLPP1  |          | PH domain and leucine            | 139 (0.00) | 43 (0.19) | 0.50 |
| 11-02 | Gp4 Focus 2 | g.chr18:60555230G>A | Intron            | PHLPP1  |          | PH domain and leucine            | 35 (0.00)  | 17 (0.29) | 0.78 |
| 11-02 | Gp4 Focus 2 | g.chr18:60561708G>A | Intron            | PHLPP1  |          | PH domain and leucine            | 21 (0.00)  | 50 (0.16) | 0.43 |
| 11-02 | Gp4 Focus 2 | g.chr18:60571819G>T | Intron            | PHLPP1  |          | PH domain and leucine            | 137 (0.01) | 34 (0.41) | 1.10 |
| 11-02 | Gp4 Focus 2 | g.chr18:60594171C>T | Intron            | PHLPP1  |          | PH domain and leucine            | 81 (0.00)  | 37 (0.24) | 0.65 |
| 11-02 | Gp4 Focus 2 | g.chr18:60628277C>T | Intron            | PHLPP1  |          | PH domain and leucine            | 18 (0.00)  | 27 (0.22) | 0.59 |
| 11-02 | Gp4 Focus 2 | g.chr18:60629442C>T | Intron            | PHLPP1  |          | PH domain and leucine            | 45 (0.00)  | 18 (0.33) | 0.89 |
| 11-02 | Gp4 Focus 2 | g.chr18:60644055G>A | Intron            | PHLPP1  |          | PH domain and leucine            | 78 (0.00)  | 12 (0.58) | 1.56 |
| 11-02 | Gp4 Focus 2 | g.chr18:60645295C>T | Intron            | PHLPP1  |          | PH domain and leucine            | 17 (0.00)  | 12 (0.42) | 1.11 |
| 11-02 | Gp4 Focus 2 | g.chr16:71687421C>T | Intron            | PHLPP2  |          | PH domain and leucine            | 50 (0.00)  | 30 (0.20) | 0.53 |
| 11-02 | Gp4 Focus 2 | g.chr16:71687894C>T | Intron            | PHLPP2  |          | PH domain and leucine            | 23 (0.00)  | 24 (0.21) | 0.56 |
| 11-02 | Gp4 Focus 2 | g.chr16:71704135G>A | Intron            | PHLPP2  |          | PH domain and leucine            | 57 (0.00)  | 41 (0.15) | 0.39 |
| 11-02 | Gp4 Focus 2 | g.chr16:71704669G>A | Intron            | PHLPP2  |          | PH domain and leucine            | 45 (0.00)  | 46 (0.17) | 0.46 |
| 11-02 | Gp4 Focus 2 | g.chr16:71709892G>A | Intron            | PHLPP2  |          | PH domain and leucine            | 85 (0.01)  | 33 (0.30) | 0.81 |
| 11-02 | Gp4 Focus 2 | g.chr16:71743611C>T | Intron            | PHLPP2  |          | PH domain and leucine            | 17 (0.00)  | 14 (0.57) | 1.52 |
| 11-02 | Gp4 Focus 2 | g.chr16:71743615C>T | Intron            | PHLPP2  |          | PH domain and leucine            | 19 (0.00)  | 14 (0.57) | 1.52 |
| 11-02 | Gp4 Focus 2 | g.chr11:601610C>A   | Missense Mutation | PHRF1   | p.P354Q  | PHD and ring finger do           | 34 (0.00)  | 46 (0.30) | 0.81 |
| 11-02 | Gp4 Focus 2 | g.chr22:21159355G>A | Missense Mutation | PI4KA   | p.R423W  | phosphatidylinositol 4-k         | 25 (0.00)  | 19 (0.26) | 0.70 |
| 11-02 | Gp4 Focus 2 | g.chr1:151271353G>A | Missense Mutation | PI4KB   | p.A634V  | phosphatidylinositol 4-k         | 48 (0.00)  | 69 (0.17) | 0.46 |
| 11-02 | Gp4 Focus 2 | g.chr16:88783613G>A | Missense Mutation | PIEZO1  | p.P2160S | piezo-type mechanosens           | 26 (0.00)  | 22 (0.36) | 0.97 |
| 11-02 | Gp4 Focus 2 | g.chr18:10784879G>A | Silent            | PIEZO2  | p.L799L  | piezo-type mechanosens           | 25 (0.00)  | 27 (0.78) | 2.07 |
| 11-02 | Gp4 Focus 2 | g.chr9:35093426G>A  | Missense Mutation | PIGO    | p.P311S  | phosphatidylinositol gly         | 21 (0.00)  | 74 (0.47) | 1.26 |
| 11-02 | Gp4 Focus 2 | g.chr19:49954062G>A | Missense Mutation | PIH1D1  | p.S45L   | PIH1 domain containing           | 30 (0.00)  | 29 (0.38) | 1.01 |
| 11-02 | Gp4 Focus 2 | g.chr12:18499771G>A | Splice Site       | PIK3C2G |          | phosphatidylinositol-4- $\gamma$ | 98 (0.00)  | 33 (0.18) | 0.48 |
| 11-02 | Gp4 Focus 2 | g.chr3:178942597A>G | Missense Mutation | PIK3CA  | p.K802E  | phosphatidylinositol-4,5         | 79 (0.00)  | 29 (0.24) | 0.64 |
| 11-02 | Gp4 Focus 2 | g.chr7:106508912G>A | Silent            | PIK3CG  | p.E302E  | phosphatidylinositol-4,5         | 16 (0.00)  | 13 (0.38) | 1.03 |
| 11-02 | Gp4 Focus 2 | g.chr7:106523482G>A | Missense Mutation | PIK3CG  | p.M878I  | phosphatidylinositol-4,5         | 116 (0.00) | 18 (0.44) | 1.19 |
| 11-02 | Gp4 Focus 2 | g.chr5:67569285G>A  | Silent            | PIK3R1  | p.K134K  | phosphoinositide-3-kina          | 85 (0.00)  | 28 (0.18) | 0.59 |
| 11-02 | Gp4 Focus 2 | g.chr5:67569306G>A  | Silent            | PIK3R1  | p.K141K  | phosphoinositide-3-kina          | 70 (0.01)  | 14 (0.36) | 1.18 |
| 11-02 | Gp4 Focus 2 | g.chr3:130437260G>A | Silent            | PIK3R4  | p.D700D  | phosphoinositide-3-kina          | 23 (0.00)  | 34 (0.21) | 0.55 |
| 11-02 | Gp4 Focus 2 | g.chr10:22830743C>T | Silent            | PIP4K2A | p.K342K  | phosphatidylinositol-5- $\gamma$ | 40 (0.00)  | 28 (0.61) | 2.03 |
| 11-02 | Gp4 Focus 2 | g.chr12:57989720G>T | Missense Mutation | PIP4K2C | p.R140L  | phosphatidylinositol-5- $\gamma$ | 20 (0.00)  | 33 (0.18) | 0.48 |
| 11-02 | Gp4 Focus 2 | g.chr17:1438536C>T  | Silent            | PITPNA  | p.L195L  | phosphatidylinositol tra         | 102 (0.00) | 25 (0.20) | 0.53 |

|       |             |                      |                   |          |          |                                 |            |           |      |
|-------|-------------|----------------------|-------------------|----------|----------|---------------------------------|------------|-----------|------|
| 11-02 | Gp4 Focus 2 | g.chr17:65528987G>A  | Missense Mutation | PITPNC1  | p.E40K   | phosphatidylinositol tra        | 16 (0.00)  | 13 (0.69) | 1.85 |
| 11-02 | Gp4 Focus 2 | g.chr11:67269868C>G  | Missense Mutation | PITPNM1  | p.V104L  | phosphatidylinositol tra        | 24 (0.00)  | 21 (0.24) | 0.63 |
| 11-02 | Gp4 Focus 2 | g.chr12:123497202C>T | Missense Mutation | PITPNM2  | p.V125M  | phosphatidylinositol tra        | 84 (0.00)  | 23 (0.35) | 0.93 |
| 11-02 | Gp4 Focus 2 | g.chr17:6387557G>A   | Silent            | PITPNM3  | p.I110I  | PITPNM family membe             | 39 (0.00)  | 58 (0.33) | 0.87 |
| 11-02 | Gp4 Focus 2 | g.chr10:3200253C>A   | Missense Mutation | PITRM1   | p.R410I  | pitrilysin metallopeptid        | 92 (0.00)  | 31 (0.29) | 0.77 |
| 11-02 | Gp4 Focus 2 | g.chr10:3209142C>T   | Silent            | PITRM1   | p.T84T   | pitrilysin metallopeptid        | 81 (0.00)  | 32 (0.19) | 0.50 |
| 11-02 | Gp4 Focus 2 | g.chr16:81197350C>T  | RNA               | PKD1L2   |          | polycystic kidney diseas        | 20 (0.00)  | 25 (0.36) | 0.96 |
| 11-02 | Gp4 Focus 2 | g.chr16:72020068G>A  | RNA               | PKD1L3   |          | polycystic kidney diseas        | 23 (0.00)  | 18 (0.28) | 0.74 |
| 11-02 | Gp4 Focus 2 | g.chr22:46657204G>A  | Silent            | PKDREJ   | p.D672D  | polycystin (PKD) family         | 78 (0.00)  | 62 (0.29) | 0.77 |
| 11-02 | Gp4 Focus 2 | g.chr22:46657796C>A  | Missense Mutation | PKDREJ   | p.R475I  | polycystin (PKD) family         | 42 (0.00)  | 24 (0.21) | 0.56 |
| 11-02 | Gp4 Focus 2 | g.chr15:72502151G>A  | Missense Mutation | PKM      | p.T143M  | pyruvate kinase, muscle         | 68 (0.00)  | 32 (0.19) | 0.50 |
| 11-02 | Gp4 Focus 2 | g.chr19:14568857G>T  | Missense Mutation | PKN1     | p.V394L  | protein kinase N1               | 63 (0.00)  | 65 (0.25) | 0.66 |
| 11-02 | Gp4 Focus 2 | g.chr2:159499090C>T  | Silent            | PKP4     | p.N596N  | plakophilin 4                   | 47 (0.00)  | 12 (0.42) | 1.11 |
| 11-02 | Gp4 Focus 2 | g.chr2:159535099G>A  | Missense Mutation | PKP4     | p.S1088N | plakophilin 4                   | 19 (0.00)  | 12 (0.83) | 2.22 |
| 11-02 | Gp4 Focus 2 | g.chr22:31532688C>A  | Missense Mutation | PLA2G3   | p.D433Y  | phospholipase A2, grou          | 56 (0.00)  | 20 (0.30) | 0.80 |
| 11-02 | Gp4 Focus 2 | g.chr1:186901980C>A  | Nonsense Mutation | PLA2G4A  | p.S215*  | phospholipase A2, grou          | 25 (0.00)  | 38 (0.29) | 0.77 |
| 11-02 | Gp4 Focus 2 | g.chr2:160879371C>T  | Splice Site       | PLA2R1   |          | phospholipase A2 recep          | 43 (0.00)  | 16 (0.31) | 0.83 |
| 11-02 | Gp4 Focus 2 | g.chr8:42037832C>A   | Nonsense Mutation | PLAT     | p.E295*  | plasminogen activator, t        | 70 (0.00)  | 49 (0.31) | 0.99 |
| 11-02 | Gp4 Focus 2 | g.chr10:75675029C>A  | Missense Mutation | PLAU     | p.Q331K  | plasminogen activator, $\alpha$ | 19 (0.00)  | 26 (0.35) | 0.92 |
| 11-02 | Gp4 Focus 2 | g.chr2:219495421G>A  | Missense Mutation | PLCD4    | p.E390K  | phospholipase C, delta          | 448 (0.00) | 28 (0.18) | 0.48 |
| 11-02 | Gp4 Focus 2 | g.chr20:39798103G>A  | Missense Mutation | PLCG1    | p.D863N  | phospholipase C, gamm           | 40 (0.00)  | 13 (0.69) | 1.85 |
| 11-02 | Gp4 Focus 2 | g.chr3:155314037C>A  | Missense Mutation | PLCH1    | p.K58N   | phospholipase C, eta            | 145 (0.00) | 9 (0.56)  | 1.48 |
| 11-02 | Gp4 Focus 2 | g.chr6:151054915C>T  | Missense Mutation | PLEKHG1  | p.T33I   | pleckstrin homology do          | 149 (0.00) | 56 (0.16) | 0.43 |
| 11-02 | Gp4 Focus 2 | g.chr14:68029593G>T  | Silent            | PLEKHH1  | p.L415L  | pleckstrin homology do          | 122 (0.00) | 35 (0.14) | 0.38 |
| 11-02 | Gp4 Focus 2 | g.chr17:62793434G>A  | RNA               | PLEKHM1P |          | pleckstrin homology do          | 127 (0.00) | 29 (0.38) | 1.01 |
| 11-02 | Gp4 Focus 2 | g.chr15:65140929C>T  | Silent            | PLEKHO2  | p.V50V   | pleckstrin homology do          | 136 (0.03) | 41 (0.68) | 1.82 |
| 11-02 | Gp4 Focus 2 | g.chr6:161134043G>A  | Missense Mutation | PLG      | p.E145K  | plasminogen                     | 52 (0.00)  | 21 (0.24) | 0.63 |
| 11-02 | Gp4 Focus 2 | g.chr6:161152149C>T  | Silent            | PLG      | p.D441D  | plasminogen                     | 78 (0.00)  | 18 (0.33) | 0.89 |
| 11-02 | Gp4 Focus 2 | g.chr9:19126238G>A   | Missense Mutation | PLIN2    | p.L34F   | perilipin 2                     | 20 (0.00)  | 19 (0.26) | 0.86 |
| 11-02 | Gp4 Focus 2 | g.chr1:45271019C>T   | Missense Mutation | PLK3     | p.L573F  | polo-like kinase 3              | 65 (0.00)  | 19 (0.26) | 0.70 |
| 11-02 | Gp4 Focus 2 | g.chr4:128812764G>A  | Missense Mutation | PLK4     | p.G595S  | polo-like kinase 4              | 75 (0.00)  | 10 (0.60) | 1.60 |
| 11-02 | Gp4 Focus 2 | g.chrX:114879374G>A  | Nonsense Mutation | PLS3     | p.W406*  | plastin 3                       | 22 (0.00)  | 14 (0.79) | 1.75 |
| 11-02 | Gp4 Focus 2 | g.chr15:74326821G>A  | Missense Mutation | PML      | p.E554K  | promyelocytic leukemia          | 20 (0.00)  | 24 (0.29) | 0.78 |
| 11-02 | Gp4 Focus 2 | g.chr7:102949466C>T  | Missense Mutation | PMPCB    | p.A306V  | peptidase (mitochondria         | 40 (0.00)  | 21 (0.33) | 0.89 |
| 11-02 | Gp4 Focus 2 | g.chr10:118385619C>T | RNA               | PNLIPRP2 |          | pancreatic lipase-related       | 45 (0.00)  | 19 (0.84) | 2.25 |

|       |             |                      |                   |          |          |                                      |           |      |
|-------|-------------|----------------------|-------------------|----------|----------|--------------------------------------|-----------|------|
| 11-02 | Gp4 Focus 2 | g.chr10:118389531G>A | RNA               | PNLIPRP2 |          | pancreatic lipase-related64 (0.00)   | 35 (0.20) | 0.53 |
| 11-02 | Gp4 Focus 2 | g.chr14:39650607G>A  | Missense Mutation | PNN      | p.R565Q  | pinin, desmosome assoc 19 (0.00)     | 22 (0.41) | 1.30 |
| 11-02 | Gp4 Focus 2 | g.chr7:108154658C>T  | Missense Mutation | PNPLA8   | p.C279Y  | patatin-like phospholipa 98 (0.00)   | 20 (0.30) | 0.80 |
| 11-02 | Gp4 Focus 2 | g.chr7:131195838G>A  | Missense Mutation | PODXL    | p.A152V  | podocalyxin-like 53 (0.00)           | 25 (0.48) | 1.28 |
| 11-02 | Gp4 Focus 2 | g.chr1:151377796C>T  | Missense Mutation | POGZ     | p.V1230I | pogo transposable elemε 41 (0.00)    | 21 (0.24) | 0.63 |
| 11-02 | Gp4 Focus 2 | g.chr1:151377853G>A  | Nonsense Mutation | POGZ     | p.Q1211* | pogo transposable elemε 20 (0.00)    | 24 (0.54) | 1.44 |
| 11-02 | Gp4 Focus 2 | g.chr11:65048595G>A  | Missense Mutation | POLA2    | p.E293K  | polymerase (DNA direc 51 (0.00)      | 25 (0.32) | 0.85 |
| 11-02 | Gp4 Focus 2 | g.chr12:133233764C>T | Silent            | POLE     | p.Q1180Q | polymerase (DNA direc 16 (0.00)      | 23 (0.35) | 0.93 |
| 11-02 | Gp4 Focus 2 | g.chr17:62492784G>A  | Silent            | POLG2    | p.P101P  | polymerase (DNA direc 37 (0.00)      | 17 (0.35) | 0.94 |
| 11-02 | Gp4 Focus 2 | g.chr3:121179021G>A  | Missense Mutation | POLQ     | p.S2343F | polymerase (DNA direc 54 (0.00)      | 29 (0.21) | 0.55 |
| 11-02 | Gp4 Focus 2 | g.chr3:121258368G>A  | Silent            | POLQ     | p.F181F  | polymerase (DNA direc 21 (0.00)      | 16 (0.50) | 1.33 |
| 11-02 | Gp4 Focus 2 | g.chr2:86310218C>T   | Silent            | POLR1A   | p.L268L  | polymerase (RNA) I pol30 (0.00)      | 17 (0.47) | 1.25 |
| 11-02 | Gp4 Focus 2 | g.chr2:86315744G>A   | Silent            | POLR1A   | p.I225I  | polymerase (RNA) I pol41 (0.00)      | 17 (0.41) | 1.10 |
| 11-02 | Gp4 Focus 2 | g.chr2:113331330C>T  | Silent            | POLR1B   | p.Y765Y  | polymerase (RNA) I pol55 (0.00)      | 64 (0.23) | 0.62 |
| 11-02 | Gp4 Focus 2 | g.chr9:37495216C>T   | Missense Mutation | POLR1E   | p.L200F  | polymerase (RNA) I pol20 (0.00)      | 27 (0.22) | 0.59 |
| 11-02 | Gp4 Focus 2 | g.chr1:145608446C>A  | Missense Mutation | POLR3C   | p.V121F  | polymerase (RNA) III (186 (0.00)     | 63 (0.14) | 0.38 |
| 11-02 | Gp4 Focus 2 | g.chr1:145608542G>A  | Missense Mutation | POLR3C   | p.P89S   | polymerase (RNA) III (176 (0.00)     | 34 (0.15) | 0.39 |
| 11-02 | Gp4 Focus 2 | g.chr8:22105413G>A   | Missense Mutation | POLR3D   | p.D85N   | polymerase (RNA) III (115 (0.00)     | 39 (0.28) | 0.75 |
| 11-02 | Gp4 Focus 2 | g.chr13:38158133G>A  | Silent            | POSTN    | p.L406L  | periostin, osteoblast spe 15 (0.00)  | 33 (0.18) | 0.48 |
| 11-02 | Gp4 Focus 2 | g.chr14:19553698C>T  | Silent            | POTEG    | p.L94L   | POTE ankyrin domain f 15 (0.00)      | 17 (0.47) | 1.25 |
| 11-02 | Gp4 Focus 2 | g.chr1:167384962C>T  | Missense Mutation | POU2F1   | p.A728V  | POU class 2 homeobox 19 (0.00)       | 32 (0.22) | 0.58 |
| 11-02 | Gp4 Focus 2 | g.chr8:128429015T>C  | Missense Mutation | POU5F1B  | p.S302P  | POU class 5 homeobox 68 (0.00)       | 13 (0.62) | 2.11 |
| 11-02 | Gp4 Focus 2 | g.chr10:71966054C>T  | Missense Mutation | PPA1     | p.C254Y  | pyrophosphatase (inorgε 50 (0.00)    | 13 (0.38) | 1.03 |
| 11-02 | Gp4 Focus 2 | g.chr22:46627932G>A  | Missense Mutation | PPARA    | p.A319T  | peroxisome proliferator-37 (0.00)    | 36 (0.31) | 0.81 |
| 11-02 | Gp4 Focus 2 | g.chr11:70118333G>C  | Missense Mutation | PPFIA1   | p.G19R   | protein tyrosine phosphε 35 (0.00)   | 35 (0.17) | 0.46 |
| 11-02 | Gp4 Focus 2 | g.chr11:7672116G>A   | Missense Mutation | PPFIBP2  | p.V580M  | PTPRF interacting prote 23 (0.00)    | 15 (0.40) | 1.07 |
| 11-02 | Gp4 Focus 2 | g.chr16:4937162C>T   | Missense Mutation | PPL      | p.E861K  | periplakin 55 (0.00)                 | 41 (0.22) | 0.70 |
| 11-02 | Gp4 Focus 2 | g.chr16:4941860T>A   | Silent            | PPL      | p.T640T  | periplakin 16 (0.00)                 | 23 (0.26) | 0.83 |
| 11-02 | Gp4 Focus 2 | g.chr2:44428429G>A   | Missense Mutation | PPM1B    | p.G31R   | protein phosphatase, Mε 109 (0.00)   | 60 (0.17) | 0.44 |
| 11-02 | Gp4 Focus 2 | g.chr2:44428467T>C   | Silent            | PPM1B    | p.V43V   | protein phosphatase, Mε 71 (0.00)    | 46 (0.20) | 0.52 |
| 11-02 | Gp4 Focus 2 | g.chr17:57057699C>A  | Nonsense Mutation | PPM1E    | p.C525*  | protein phosphatase, Mε 20 (0.00)    | 28 (0.18) | 0.48 |
| 11-02 | Gp4 Focus 2 | g.chr12:80199447G>A  | Missense Mutation | PPP1R12A | p.A642V  | protein phosphatase 1, rε 127 (0.00) | 26 (0.42) | 1.13 |
| 11-02 | Gp4 Focus 2 | g.chr19:49376856G>A  | Silent            | PPP1R15A | p.E122E  | protein phosphatase 1, rε 33 (0.00)  | 25 (0.64) | 1.71 |
| 11-02 | Gp4 Focus 2 | g.chr19:49377777G>A  | Silent            | PPP1R15A | p.L429L  | protein phosphatase 1, rε 47 (0.00)  | 24 (0.33) | 0.89 |
| 11-02 | Gp4 Focus 2 | g.chr2:48686899G>T   | Nonsense Mutation | PPP1R21  | p.E128*  | protein phosphatase 1, rε 27 (0.00)  | 14 (0.43) | 1.14 |

|       |             |                      |                   |          |          |                                               |            |      |
|-------|-------------|----------------------|-------------------|----------|----------|-----------------------------------------------|------------|------|
| 11-02 | Gp4 Focus 2 | g.chr7:94898663G>T   | Missense Mutation | PPP1R9A  | p.A990S  | protein phosphatase 1, r165 (0.02)            | 30 (0.23)  | 0.62 |
| 11-02 | Gp4 Focus 2 | g.chr11:111622948C>T | Missense Mutation | PPP2R1B  | p.E380K  | protein phosphatase 2, r155 (0.00)            | 48 (0.25)  | 0.67 |
| 11-02 | Gp4 Focus 2 | g.chr6:42974996C>T   | Silent            | PPP2R5D  | p.D195D  | protein phosphatase 2, r198 (0.00)            | 45 (0.31)  | 0.83 |
| 11-02 | Gp4 Focus 2 | g.chr11:68341626G>A  | Missense Mutation | PPP6R3   | p.A233T  | protein phosphatase 6, r162 (0.00)            | 51 (0.35)  | 0.94 |
| 11-02 | Gp4 Focus 2 | g.chr10:103899718G>A | Missense Mutation | PPRC1    | p.G485R  | peroxisome proliferator-25 (0.00)             | 29 (0.31)  | 0.83 |
| 11-02 | Gp4 Focus 2 | g.chr1:40557790G>A   | Nonsense Mutation | PPT1     | p.Q97*   | palmitoyl-protein thioesterase 67 (0.00)      | 23 (0.26)  | 0.70 |
| 11-02 | Gp4 Focus 2 | g.chr1:13695891G>A   | Silent            | PRAMEF19 | p.D289D  | PRAME family member 133 (0.00)                | 118 (0.49) | 1.31 |
| 11-02 | Gp4 Focus 2 | g.chr1:13001314C>T   | Silent            | PRAMEF6  | p.G123G  | PRAME family member 63 (0.00)                 | 41 (0.24)  | 0.65 |
| 11-02 | Gp4 Focus 2 | g.chr4:121774689C>T  | Missense Mutation | PRDM5    | p.G62R   | PR domain containing 571 (0.00)               | 68 (0.19)  | 0.51 |
| 11-02 | Gp4 Focus 2 | g.chr1:173450484C>T  | Missense Mutation | PRDX6    | p.H39Y   | peroxiredoxin 6 58 (0.00)                     | 27 (0.37)  | 0.99 |
| 11-02 | Gp4 Focus 2 | g.chr8:69031732G>A   | Missense Mutation | PREX2    | p.E1163K | phosphatidylinositol-3-kinase 461 (0.00)      | 30 (0.17)  | 0.56 |
| 11-02 | Gp4 Focus 2 | g.chr1:186277330G>A  | Missense Mutation | PRG4     | p.A827T  | proteoglycan 4 124 (0.00)                     | 73 (0.22)  | 0.58 |
| 11-02 | Gp4 Focus 2 | g.chr3:64132672G>A   | Silent            | PRICKLE2 | p.I554I  | prickle homolog 2 (Drosophila) 23 (0.00)      | 17 (0.35)  | 0.94 |
| 11-02 | Gp4 Focus 2 | g.chr3:64138955G>A   | Silent            | PRICKLE2 | p.G286G  | prickle homolog 2 (Drosophila) 40 (0.00)      | 31 (0.19)  | 0.52 |
| 11-02 | Gp4 Focus 2 | g.chr4:185580533G>A  | Missense Mutation | PRIMPOL  | p.G74R   | primase and polymerase 39 (0.00)              | 19 (0.63)  | 1.68 |
| 11-02 | Gp4 Focus 2 | g.chr5:40765261C>T   | Missense Mutation | PRKAA1   | p.D301N  | protein kinase, AMP-activated 80 (0.00)       | 21 (0.48)  | 1.27 |
| 11-02 | Gp4 Focus 2 | g.chr1:84668378G>A   | Missense Mutation | PRKACB   | p.A266T  | protein kinase, cAMP-dependent 40 (0.00)      | 31 (0.55)  | 1.46 |
| 11-02 | Gp4 Focus 2 | g.chr1:84668384G>A   | Missense Mutation | PRKACB   | p.D268N  | protein kinase, cAMP-dependent 40 (0.00)      | 31 (0.55)  | 1.46 |
| 11-02 | Gp4 Focus 2 | g.chr17:64800101G>A  | Silent            | PRKCA    | p.G655G  | protein kinase C, alpha 20 (0.00)             | 17 (0.41)  | 1.10 |
| 11-02 | Gp4 Focus 2 | g.chr14:61995914G>A  | Missense Mutation | PRKCH    | p.D519N  | protein kinase C, eta 40 (0.00)               | 53 (0.64)  | 1.71 |
| 11-02 | Gp4 Focus 2 | g.chr3:169991115C>G  | Missense Mutation | PRKCI    | p.D211E  | protein kinase C, iota 23 (0.00)              | 21 (0.76)  | 2.03 |
| 11-02 | Gp4 Focus 2 | g.chr2:37543468C>T   | Missense Mutation | PRKD3    | p.G67D   | protein kinase D3 80 (0.00)                   | 20 (0.30)  | 0.80 |
| 11-02 | Gp4 Focus 2 | g.chr11:20414508G>A  | Silent            | PRMT3    | p.L121L  | protein arginine methyltransferase 40 (0.00)  | 18 (0.44)  | 1.19 |
| 11-02 | Gp4 Focus 2 | g.chr13:39585534G>A  | Nonsense Mutation | PROSER1  | p.Q935*  | proline and serine rich protein 153 (0.00)    | 37 (0.24)  | 0.65 |
| 11-02 | Gp4 Focus 2 | g.chr13:39588360G>A  | Silent            | PROSER1  | p.P343P  | proline and serine rich protein 143 (0.00)    | 44 (0.43)  | 1.15 |
| 11-02 | Gp4 Focus 2 | g.chr13:39588362G>A  | Missense Mutation | PROSER1  | p.P343S  | proline and serine rich protein 143 (0.00)    | 44 (0.45)  | 1.21 |
| 11-02 | Gp4 Focus 2 | g.chr10:13647711G>A  | Silent            | PRPF18   | p.R110R  | pre-mRNA processing factor 148 (0.00)         | 50 (0.20)  | 0.67 |
| 11-02 | Gp4 Focus 2 | g.chr1:150297505G>A  | Silent            | PRPF3    | p.L35L   | pre-mRNA processing factor 47 (0.02)          | 43 (0.40)  | 1.05 |
| 11-02 | Gp4 Focus 2 | g.chr1:150315863G>A  | Missense Mutation | PRPF3    | p.R454K  | pre-mRNA processing factor 16 (0.00)          | 24 (0.46)  | 1.22 |
| 11-02 | Gp4 Focus 2 | g.chr12:50037897G>A  | Silent            | PRPF40B  | p.T867T  | PRP40 pre-mRNA processing factor 26 (0.00)    | 41 (0.15)  | 0.39 |
| 11-02 | Gp4 Focus 2 | g.chr17:1577807G>A   | Silent            | PRPF8    | p.D1076D | pre-mRNA processing factor 37 (0.00)          | 17 (0.35)  | 0.94 |
| 11-02 | Gp4 Focus 2 | g.chr17:1578913C>T   | Splice Site       | PRPF8    |          | pre-mRNA processing factor 57 (0.00)          | 14 (0.71)  | 1.90 |
| 11-02 | Gp4 Focus 2 | g.chr6:42689559G>A   | Missense Mutation | PRPH2    | p.R172W  | peripherin 2 (retinal degeneration) 75 (0.00) | 19 (0.53)  | 1.40 |
| 11-02 | Gp4 Focus 2 | g.chr22:32111707G>A  | Silent            | PRR14L   | p.T706T  | proline rich 14-like protein 60 (0.00)        | 50 (0.26)  | 0.69 |
| 11-02 | Gp4 Focus 2 | g.chr12:10999870T>C  | Missense Mutation | PRR4     | p.D66G   | proline rich 4 (lacrima) 26 (0.00)            | 67 (0.30)  | 0.80 |

|       |             |                     |                   |         |          |                                         |            |      |
|-------|-------------|---------------------|-------------------|---------|----------|-----------------------------------------|------------|------|
| 11-02 | Gp4 Focus 2 | g.chr5:139217251G>A | Silent            | PSD2    | p.L569L  | pleckstrin and Sec7 dom 17 (0.00)       | 48 (0.15)  | 0.39 |
| 11-02 | Gp4 Focus 2 | g.chr8:18413773G>A  | Silent            | PSD3    | p.V958V  | pleckstrin and Sec7 dom 53 (0.00)       | 46 (0.17)  | 0.46 |
| 11-02 | Gp4 Focus 2 | g.chr19:43702223G>A | Missense Mutation | PSG4    | p.A212V  | pregnancy specific beta- 131 (0.00)     | 31 (0.42)  | 1.12 |
| 11-02 | Gp4 Focus 2 | g.chr19:43689226G>A | Silent            | PSG5    | p.S46S   | pregnancy specific beta- 33 (0.00)      | 55 (0.71)  | 1.89 |
| 11-02 | Gp4 Focus 2 | g.chr17:4700776C>T  | Missense Mutation | PSMB6   | p.H72Y   | proteasome (prosome, n 48 (0.00)        | 24 (0.38)  | 1.00 |
| 11-02 | Gp4 Focus 2 | g.chr11:47445615C>T | Silent            | PSMC3   | p.L191L  | proteasome (prosome, n 23 (0.00)        | 16 (0.38)  | 1.00 |
| 11-02 | Gp4 Focus 2 | g.chr2:231949755G>A | Missense Mutation | PSMD1   | p.G582E  | proteasome (prosome, n 95 (0.00)        | 30 (0.73)  | 1.96 |
| 11-02 | Gp4 Focus 2 | g.chr3:184021185G>A | Missense Mutation | PSMD2   | p.A383T  | proteasome (prosome, n 26 (0.00)        | 27 (0.30)  | 0.79 |
| 11-02 | Gp4 Focus 2 | g.chr17:38146426C>T | Silent            | PSMD3   | p.H319H  | proteasome (prosome, n 25 (0.00)        | 15 (0.53)  | 1.42 |
| 11-02 | Gp4 Focus 2 | g.chr1:28477329G>C  | Missense Mutation | PTAFR   | p.I68M   | platelet-activating factor 22 (0.00)    | 28 (0.29)  | 0.76 |
| 11-02 | Gp4 Focus 2 | g.chr9:115060164G>A | Silent            | PTBP3   | p.I25I   | polypyrimidine tract bin 56 (0.00)      | 25 (0.40)  | 1.07 |
| 11-02 | Gp4 Focus 2 | g.chr2:86333424G>A  | Silent            | PTCD3   | p.Q18Q   | pentatricopeptide repeat 27 (0.00)      | 24 (0.21)  | 0.56 |
| 11-02 | Gp4 Focus 2 | g.chr10:89646899G>A | Intron            | PTEN    |          | phosphatase and tensin 1143 (0.00)      | 27 (0.26)  | 0.69 |
| 11-02 | Gp4 Focus 2 | g.chr10:89676442C>T | Intron            | PTEN    |          | phosphatase and tensin 173 (0.00)       | 11 (0.45)  | 1.21 |
| 11-02 | Gp4 Focus 2 | g.chr10:89681333G>A | Intron            | PTEN    |          | phosphatase and tensin 128 (0.00)       | 29 (0.24)  | 0.64 |
| 11-02 | Gp4 Focus 2 | g.chr10:89681825G>A | Intron            | PTEN    |          | phosphatase and tensin 148 (0.00)       | 25 (0.72)  | 1.92 |
| 11-02 | Gp4 Focus 2 | g.chr10:89706751G>A | Intron            | PTEN    |          | phosphatase and tensin 1163 (0.00)      | 102 (0.15) | 0.39 |
| 11-02 | Gp4 Focus 2 | g.chr10:89721162G>A | Intron            | PTEN    |          | phosphatase and tensin 165 (0.00)       | 25 (0.24)  | 0.64 |
| 11-02 | Gp4 Focus 2 | g.chr10:89723489A>G | Intron            | PTEN    |          | phosphatase and tensin 164 (0.00)       | 75 (0.44)  | 1.17 |
| 11-02 | Gp4 Focus 2 | g.chr17:41122347C>T | Missense Mutation | PTGES3L | p.V136I  | prostaglandin E synthase 103 (0.00)     | 74 (0.27)  | 0.72 |
| 11-02 | Gp4 Focus 2 | g.chr7:77175389C>T  | Intron            | PTPN12  |          | protein tyrosine phosphatase 18 (0.00)  | 30 (0.17)  | 0.44 |
| 11-02 | Gp4 Focus 2 | g.chr7:77177981G>A  | Intron            | PTPN12  |          | protein tyrosine phosphatase 81 (0.00)  | 37 (0.49)  | 1.30 |
| 11-02 | Gp4 Focus 2 | g.chr7:77200029G>A  | Intron            | PTPN12  |          | protein tyrosine phosphatase 86 (0.00)  | 55 (0.51)  | 1.36 |
| 11-02 | Gp4 Focus 2 | g.chr7:77214346G>A  | Intron            | PTPN12  |          | protein tyrosine phosphatase 35 (0.00)  | 20 (0.45)  | 1.20 |
| 11-02 | Gp4 Focus 2 | g.chr7:77217668G>A  | Intron            | PTPN12  |          | protein tyrosine phosphatase 46 (0.00)  | 43 (0.30)  | 0.81 |
| 11-02 | Gp4 Focus 2 | g.chr7:77244925G>A  | Intron            | PTPN12  |          | protein tyrosine phosphatase 32 (0.00)  | 31 (0.26)  | 0.69 |
| 11-02 | Gp4 Focus 2 | g.chr4:87653847G>A  | Missense Mutation | PTPN13  | p.D596N  | protein tyrosine phosphatase 110 (0.00) | 28 (0.29)  | 0.76 |
| 11-02 | Gp4 Focus 2 | g.chr4:87703402A>T  | Missense Mutation | PTPN13  | p.D2009V | protein tyrosine phosphatase 64 (0.02)  | 57 (0.16)  | 0.42 |
| 11-02 | Gp4 Focus 2 | g.chr18:12817232C>T | Missense Mutation | PTPN2   | p.G181R  | protein tyrosine phosphatase 30 (0.00)  | 40 (0.25)  | 0.67 |
| 11-02 | Gp4 Focus 2 | g.chr2:120709635G>A | Silent            | PTPN4   | p.Q581Q  | protein tyrosine phosphatase 29 (0.00)  | 24 (0.42)  | 1.33 |
| 11-02 | Gp4 Focus 2 | g.chr12:70946701G>A | Missense Mutation | PTPRB   | p.A1660V | protein tyrosine phosphatase 106 (0.00) | 37 (0.59)  | 1.59 |
| 11-02 | Gp4 Focus 2 | g.chr9:8341129C>T   | Missense Mutation | PTPRD   | p.G1696E | protein tyrosine phosphatase 48 (0.00)  | 20 (0.30)  | 0.80 |
| 11-02 | Gp4 Focus 2 | g.chr9:8518145C>T   | Missense Mutation | PTPRD   | p.A416T  | protein tyrosine phosphatase 57 (0.02)  | 20 (0.55)  | 1.47 |
| 11-02 | Gp4 Focus 2 | g.chr1:44084320G>A  | Nonsense Mutation | PTPRF   | p.W1455* | protein tyrosine phosphatase 21 (0.00)  | 29 (0.28)  | 0.74 |
| 11-02 | Gp4 Focus 2 | g.chr6:128294971G>A | Splice Site       | PTPRK   | p.P1330L | protein tyrosine phosphatase 16 (0.00)  | 32 (0.16)  | 0.42 |

|       |             |                     |                   |           |          |                                                         |            |      |
|-------|-------------|---------------------|-------------------|-----------|----------|---------------------------------------------------------|------------|------|
| 11-02 | Gp4 Focus 2 | g.chr6:128718768C>T | Missense Mutation | PTPRK     | p.E56K   | protein tyrosine phosphatase 91 (0.00)                  | 27 (0.26)  | 0.69 |
| 11-02 | Gp4 Focus 2 | g.chr18:8113582C>T  | Missense Mutation | PTPRM     | p.A652V  | protein tyrosine phosphatase 47 (0.00)                  | 13 (0.38)  | 1.03 |
| 11-02 | Gp4 Focus 2 | g.chr12:15679197G>A | Splice Site       | PTPRO     |          | protein tyrosine phosphatase 35 (0.00)                  | 38 (0.63)  | 1.68 |
| 11-02 | Gp4 Focus 2 | g.chr12:15742450G>A | Missense Mutation | PTPRO     | p.D1158N | protein tyrosine phosphatase 64 (0.00)                  | 77 (0.32)  | 0.87 |
| 11-02 | Gp4 Focus 2 | g.chr12:71033048C>A | Missense Mutation | PTPRR     | p.M518I  | protein tyrosine phosphatase 69 (0.00)                  | 24 (0.33)  | 0.89 |
| 11-02 | Gp4 Focus 2 | g.chr8:144898944C>T | Missense Mutation | PUF60     | p.D476N  | poly-U binding splicing factor 19 (0.00)                | 32 (0.50)  | 1.33 |
| 11-02 | Gp4 Focus 2 | g.chr5:139494511G>A | Missense Mutation | PURA      | p.V249M  | purine-rich element binding protein 42 (0.00)           | 17 (0.47)  | 1.25 |
| 11-02 | Gp4 Focus 2 | g.chr7:105108800G>A | Silent            | PUS7      | p.D503D  | pseudouridylate synthase 128 (0.00)                     | 91 (0.22)  | 0.59 |
| 11-02 | Gp4 Focus 2 | g.chr5:159520808G>A | Silent            | PWWP2A    | p.N283N  | PWWP domain containing protein 131 (0.00)               | 36 (0.19)  | 0.52 |
| 11-02 | Gp4 Focus 2 | g.chr2:1652070C>T   | Missense Mutation | PXDN      | p.R1161Q | peroxidase homolog (D58) (0.00)                         | 51 (0.16)  | 0.51 |
| 11-02 | Gp4 Focus 2 | g.chr20:25255237G>A | Missense Mutation | PYGB      | p.A180T  | phosphorylase, glycogen (22) (0.00)                     | 31 (0.16)  | 0.43 |
| 11-02 | Gp4 Focus 2 | g.chr12:9349652G>A  | Missense Mutation | PZP       | p.L275F  | pregnancy-zone protein 46 (0.02)                        | 11 (0.55)  | 1.45 |
| 11-02 | Gp4 Focus 2 | g.chr6:163991727C>T | Splice Site       | QKI       | p.A337A  | QKI, KH domain containing protein 222 (0.00)            | 102 (0.21) | 0.55 |
| 11-02 | Gp4 Focus 2 | g.chr1:180153105C>T | Silent            | QSOX1     | p.L269L  | quiescin Q6 sulfhydryl cyclase 36 (0.00)                | 25 (0.20)  | 0.53 |
| 11-02 | Gp4 Focus 2 | g.chr10:99969408G>A | Missense Mutation | R3HCC1L   | p.G513S  | R3H domain and coiled-coil protein 53 (0.00)            | 15 (0.47)  | 1.24 |
| 11-02 | Gp4 Focus 2 | g.chr8:37732359C>G  | Missense Mutation | RAB11FIP1 | p.R432S  | RAB11 family interacting protein 50 (0.00)              | 19 (0.47)  | 1.53 |
| 11-02 | Gp4 Focus 2 | g.chr8:37732650G>A  | Silent            | RAB11FIP1 | p.I335I  | RAB11 family interacting protein 28 (0.00)              | 19 (0.32)  | 1.02 |
| 11-02 | Gp4 Focus 2 | g.chr17:29858684G>A | Silent            | RAB11FIP4 | p.Q616Q  | RAB11 family interacting protein 19 (0.00)              | 22 (0.27)  | 0.73 |
| 11-02 | Gp4 Focus 2 | g.chr2:238485939G>A | Silent            | RAB17     | p.N5N    | RAB17, member RAS c25 (0.00)                            | 26 (0.85)  | 2.26 |
| 11-02 | Gp4 Focus 2 | g.chr19:11448022G>A | Silent            | RAB3D     | p.N18N   | RAB3D, member RAS c51 (0.00)                            | 30 (0.40)  | 1.07 |
| 11-02 | Gp4 Focus 2 | g.chr11:61665813C>T | Silent            | RAB3IL1   | p.E362E  | RAB3A interacting protein 26 (0.00)                     | 19 (0.42)  | 1.12 |
| 11-02 | Gp4 Focus 2 | g.chr9:125758380G>A | Silent            | RABGAP1   | p.K328K  | RAB GTPase activating protein 43 (0.00)                 | 17 (0.53)  | 1.41 |
| 11-02 | Gp4 Focus 2 | g.chr9:125835830G>A | Splice Site       | RABGAP1   |          | RAB GTPase activating protein 145 (0.00)                | 40 (0.33)  | 0.87 |
| 11-02 | Gp4 Focus 2 | g.chr1:174945263C>T | Nonsense Mutation | RABGAP1L  | p.Q184*  | RAB GTPase activating protein 38 (0.00)                 | 34 (0.47)  | 1.25 |
| 11-02 | Gp4 Focus 2 | g.chr1:174952030G>A | Silent            | RABGAP1L  | p.L250L  | RAB GTPase activating protein 24 (0.00)                 | 17 (0.53)  | 1.41 |
| 11-02 | Gp4 Focus 2 | g.chr3:51667766C>T  | Silent            | RAD54L2   | p.A333A  | RAD54-like 2 (S. cerevisiae) 40 (0.00)                  | 23 (0.30)  | 0.81 |
| 11-02 | Gp4 Focus 2 | g.chr17:17697507G>A | Silent            | RAI1      | p.K415K  | retinoic acid induced 1 18 (0.00)                       | 15 (0.33)  | 0.89 |
| 11-02 | Gp4 Focus 2 | g.chr5:34811131G>A  | Silent            | RAI14     | p.P155P  | retinoic acid induced 14 97 (0.00)                      | 18 (0.44)  | 1.19 |
| 11-02 | Gp4 Focus 2 | g.chr14:36159046G>A | Silent            | RALGAPA1  | p.A810A  | Ral GTPase activating protein 27 (0.00)                 | 15 (0.40)  | 1.27 |
| 11-02 | Gp4 Focus 2 | g.chr20:20621434C>T | Missense Mutation | RALGAPA2  | p.C154Y  | Ral GTPase activating protein 48 (0.00)                 | 20 (0.25)  | 0.67 |
| 11-02 | Gp4 Focus 2 | g.chr20:37177331G>A | Splice Site       | RALGAPB   |          | Ral GTPase activating protein 56 (0.00)                 | 18 (0.33)  | 0.89 |
| 11-02 | Gp4 Focus 2 | g.chr9:135983518C>T | Missense Mutation | RALGDS    | p.E352K  | ral guanine nucleotide dissociation inhibitor 15 (0.00) | 26 (0.23)  | 0.62 |
| 11-02 | Gp4 Focus 2 | g.chr9:129931005C>T | Missense Mutation | RALGPS1   | p.R266C  | Ral GEF with PH domain 27 (0.00)                        | 31 (0.26)  | 0.69 |
| 11-02 | Gp4 Focus 2 | g.chr17:40914412G>A | Missense Mutation | RAMP2     | p.C73Y   | receptor (G protein-coupled) 25 (0.00)                  | 31 (0.29)  | 0.77 |
| 11-02 | Gp4 Focus 2 | g.chr2:109380869G>A | Missense Mutation | RANBP2    | p.A1292T | RAN binding protein 2 20 (0.00)                         | 15 (0.40)  | 1.07 |

|       |             |                      |                   |           |          |                          |            |           |      |
|-------|-------------|----------------------|-------------------|-----------|----------|--------------------------|------------|-----------|------|
| 11-02 | Gp4 Focus 2 | g.chr2:109380890G>A  | Missense Mutation | RANBP2    | p.E1299K | RAN binding protein 2    | 23 (0.00)  | 16 (0.31) | 0.83 |
| 11-02 | Gp4 Focus 2 | g.chr4:160260329G>A  | Missense Mutation | RAPGEF2   | p.S625N  | Rap guanine nucleotide   | 54 (0.00)  | 50 (0.24) | 0.64 |
| 11-02 | Gp4 Focus 2 | g.chr2:204304663G>A  | Silent            | RAPH1     | p.L1084L | Ras association (RalGD   | 18 (0.00)  | 19 (0.42) | 1.12 |
| 11-02 | Gp4 Focus 2 | g.chr5:167937667G>T  | Missense Mutation | RARS      | p.K476N  | arginyl-tRNA synthetas   | 15 (0.00)  | 13 (0.62) | 1.64 |
| 11-02 | Gp4 Focus 2 | g.chr1:178433454G>A  | Silent            | RASAL2    | p.E1098E | RAS protein activator li | 21 (0.00)  | 25 (0.20) | 0.53 |
| 11-02 | Gp4 Focus 2 | g.chr19:15567374G>C  | Silent            | RASAL3    | p.A505A  | RAS protein activator li | 17 (0.00)  | 24 (0.46) | 1.22 |
| 11-02 | Gp4 Focus 2 | g.chr22:35947944C>T  | Silent            | RASD2     | p.V222V  | RASD family, member      | 19 (0.00)  | 34 (0.44) | 1.18 |
| 11-02 | Gp4 Focus 2 | g.chr15:79296430G>A  | Silent            | RASGRF1   | p.F721F  | Ras protein-specific gua | 25 (0.00)  | 21 (0.29) | 0.76 |
| 11-02 | Gp4 Focus 2 | g.chr5:80497194C>T   | Silent            | RASGRF2   | p.L947L  | Ras protein-specific gua | 69 (0.00)  | 20 (0.70) | 1.87 |
| 11-02 | Gp4 Focus 2 | g.chr2:33745660C>T   | Missense Mutation | RASGRP3   | p.L93F   | RAS guanyl releasing pr  | 117 (0.00) | 26 (0.54) | 1.44 |
| 11-02 | Gp4 Focus 2 | g.chr4:53731836A>G   | Missense Mutation | RASL11B   | p.K204R  | RAS-like, family 11, mε  | 84 (0.00)  | 20 (0.25) | 0.67 |
| 11-02 | Gp4 Focus 2 | g.chr13:48906957G>A  | Intron            | RB1       |          | retinoblastoma 1         | 112 (0.00) | 51 (0.18) | 0.47 |
| 11-02 | Gp4 Focus 2 | g.chr13:48906970G>A  | Intron            | RB1       |          | retinoblastoma 1         | 108 (0.00) | 55 (0.16) | 0.44 |
| 11-02 | Gp4 Focus 2 | g.chr13:48920182G>A  | Intron            | RB1       |          | retinoblastoma 1         | 30 (0.00)  | 20 (0.40) | 1.07 |
| 11-02 | Gp4 Focus 2 | g.chr13:48940260T>C  | Intron            | RB1       |          | retinoblastoma 1         | 74 (0.00)  | 36 (0.17) | 0.44 |
| 11-02 | Gp4 Focus 2 | g.chr13:48944347G>A  | Intron            | RB1       |          | retinoblastoma 1         | 57 (0.00)  | 26 (0.27) | 0.72 |
| 11-02 | Gp4 Focus 2 | g.chr13:48945127G>A  | Intron            | RB1       |          | retinoblastoma 1         | 67 (0.00)  | 10 (0.60) | 1.60 |
| 11-02 | Gp4 Focus 2 | g.chr13:49011786C>T  | Intron            | RB1       |          | retinoblastoma 1         | 30 (0.00)  | 23 (0.26) | 0.70 |
| 11-02 | Gp4 Focus 2 | g.chr13:49011796C>T  | Intron            | RB1       |          | retinoblastoma 1         | 32 (0.00)  | 25 (0.24) | 0.64 |
| 11-02 | Gp4 Focus 2 | g.chr13:49019423C>G  | Intron            | RB1       |          | retinoblastoma 1         | 94 (0.00)  | 36 (0.42) | 1.11 |
| 11-02 | Gp4 Focus 2 | g.chr13:49021822G>A  | Intron            | RB1       |          | retinoblastoma 1         | 45 (0.00)  | 11 (0.64) | 1.70 |
| 11-02 | Gp4 Focus 2 | g.chr13:49032700G>A  | Intron            | RB1       |          | retinoblastoma 1         | 78 (0.00)  | 27 (0.33) | 0.89 |
| 11-02 | Gp4 Focus 2 | g.chr7:5097349G>T    | Missense Mutation | RBAK-RBAK | p.K59N   | RBAK-RBAKDN readt        | 71 (0.00)  | 18 (0.28) | 0.99 |
| 11-02 | Gp4 Focus 2 | g.chr1:205070740G>A  | Missense Mutation | RBBP5     | p.A207V  | retinoblastoma binding   | 131 (0.00) | 19 (0.26) | 0.70 |
| 11-02 | Gp4 Focus 2 | g.chr18:77802150C>T  | Silent            | RBFA      | p.S169S  | ribosome binding factor  | 19 (0.00)  | 35 (0.26) | 0.82 |
| 11-02 | Gp4 Focus 2 | g.chr22:36155987C>T  | Missense Mutation | RBF0X2    | p.V353I  | RNA binding protein, fc  | 29 (0.00)  | 21 (0.81) | 2.16 |
| 11-02 | Gp4 Focus 2 | g.chr20:34242913G>C  | Nonsense Mutation | RBM12     | p.S111*  | RNA binding motif prot   | 104 (0.00) | 40 (0.25) | 0.67 |
| 11-02 | Gp4 Focus 2 | g.chr5:145631391C>G  | Missense Mutation | RBM27     | p.S466C  | RNA binding motif prot   | 120 (0.00) | 35 (0.14) | 0.38 |
| 11-02 | Gp4 Focus 2 | g.chr2:238733009G>A  | Missense Mutation | RBM44     | p.G800E  | RNA binding motif prot   | 53 (0.00)  | 38 (0.24) | 0.63 |
| 11-02 | Gp4 Focus 2 | g.chr4:155719364G>A  | Missense Mutation | RBM46     | p.G185S  | RNA binding motif prot   | 50 (0.00)  | 24 (0.21) | 0.56 |
| 11-02 | Gp4 Focus 2 | g.chr1:17748788C>A   | Splice Site       | RCC2      |          | regulator of chromosom   | 26 (0.00)  | 42 (0.52) | 1.40 |
| 11-02 | Gp4 Focus 2 | g.chr15:91503680G>A  | Missense Mutation | RCCD1     | p.D299N  | RCC1 domain containin    | 24 (0.00)  | 30 (0.33) | 0.89 |
| 11-02 | Gp4 Focus 2 | g.chr9:4844682G>T    | Splice Site       | RCL1      |          | RNA terminal phosphat    | 33 (0.00)  | 28 (0.25) | 0.67 |
| 11-02 | Gp4 Focus 2 | g.chr14:103188668G>A | Missense Mutation | RCOR1     | p.G445D  | REST corepressor 1       | 145 (0.00) | 42 (0.55) | 1.46 |
| 11-02 | Gp4 Focus 2 | g.chr17:9808156G>A   | Silent            | RCVRN     | p.N114N  | recoverin                | 20 (0.00)  | 26 (0.19) | 0.51 |

|       |             |                      |                   |         |          |                                 |             |           |      |
|-------|-------------|----------------------|-------------------|---------|----------|---------------------------------|-------------|-----------|------|
| 11-02 | Gp4 Focus 2 | g.chr14:24642597C>A  | Missense Mutation | REC8    | p.P147T  | REC8 meiotic recombination      | 22 (0.00)   | 21 (0.43) | 0.63 |
| 11-02 | Gp4 Focus 2 | g.chr19:45537769T>C  | Missense Mutation | RELB    | p.L446P  | v-rel avian reticuloendothelial | 21 (0.00)   | 33 (0.15) | 0.40 |
| 11-02 | Gp4 Focus 2 | g.chr7:103143605C>A  | Missense Mutation | RELN    | p.G2783C | reelin                          | 29 (0.00)   | 16 (0.50) | 1.33 |
| 11-02 | Gp4 Focus 2 | g.chr7:103143606G>A  | Silent            | RELN    | p.F2782F | reelin                          | 30 (0.00)   | 16 (0.50) | 1.33 |
| 11-02 | Gp4 Focus 2 | g.chr7:103301840C>T  | Missense Mutation | RELN    | p.R475K  | reelin                          | 33 (0.00)   | 14 (0.36) | 0.95 |
| 11-02 | Gp4 Focus 2 | g.chr4:57797744C>G   | Missense Mutation | REST    | p.P907R  | RE1-silencing transcript        | 31 (0.00)   | 31 (0.23) | 0.60 |
| 11-02 | Gp4 Focus 2 | g.chr6:111694221C>T  | Silent            | REV3L   | p.R1779R | REV3-like, polymerase           | 82 (0.00)   | 25 (0.20) | 0.53 |
| 11-02 | Gp4 Focus 2 | g.chr3:16535263G>A   | Silent            | RFTN1   | p.Y38Y   | raftlin, lipid raft linker      | 1106 (0.01) | 35 (0.14) | 0.38 |
| 11-02 | Gp4 Focus 2 | g.chr2:198436905G>A  | Missense Mutation | RFTN2   | p.H445Y  | raftlin family member           | 235 (0.00)  | 34 (0.44) | 1.18 |
| 11-02 | Gp4 Focus 2 | g.chr6:117248301C>G  | Missense Mutation | RFX6    | p.P666R  | regulatory factor X, 6          | 96 (0.00)   | 43 (0.21) | 0.56 |
| 11-02 | Gp4 Focus 2 | g.chr15:56386709C>T  | Missense Mutation | RFX7    | p.G976S  | regulatory factor X, 7          | 112 (0.00)  | 45 (0.31) | 0.83 |
| 11-02 | Gp4 Focus 2 | g.chr15:56386724C>T  | Missense Mutation | RFX7    | p.G971R  | regulatory factor X, 7          | 115 (0.00)  | 38 (0.26) | 0.70 |
| 11-02 | Gp4 Focus 2 | g.chr10:86008732G>T  | Silent            | RGR     | p.V101V  | retinal G protein couple        | 20 (0.00)   | 66 (0.17) | 0.44 |
| 11-02 | Gp4 Focus 2 | g.chr8:54764561T>A   | Nonsense Mutation | RGS20   | p.Y34*   | regulator of G-protein si       | 41 (0.00)   | 22 (0.23) | 0.77 |
| 11-02 | Gp4 Focus 2 | g.chr1:182443674C>A  | Nonsense Mutation | RGSL1   | p.C476*  | regulator of G-protein si       | 18 (0.00)   | 11 (0.45) | 1.21 |
| 11-02 | Gp4 Focus 2 | g.chr12:2997280C>T   | Silent            | RHNO1   | p.S110S  | RAD9-HUS1-RAD1 int              | 21 (0.00)   | 26 (0.19) | 0.51 |
| 11-02 | Gp4 Focus 2 | g.chr12:2997452T>C   | Missense Mutation | RHNO1   | p.C168R  | RAD9-HUS1-RAD1 int              | 37 (0.00)   | 19 (0.37) | 0.98 |
| 11-02 | Gp4 Focus 2 | g.chr10:62631992G>A  | Silent            | RHOBTB1 | p.Y624Y  | Rho-related BTB domai           | 33 (0.00)   | 19 (0.32) | 1.00 |
| 11-02 | Gp4 Focus 2 | g.chr5:95119514G>A   | Silent            | RHOBTB3 | p.Q490Q  | Rho-related BTB domai           | 48 (0.00)   | 26 (0.23) | 0.62 |
| 11-02 | Gp4 Focus 2 | g.chr1:113245192A>G  | Missense Mutation | RHOC    | p.M134T  | ras homolog family mem          | 43 (0.00)   | 41 (0.22) | 0.46 |
| 11-02 | Gp4 Focus 2 | g.chr12:107219519T>C | Missense Mutation | RIC8B   | p.F253L  | RIC8 guanine nucleotid          | 23 (0.00)   | 13 (0.62) | 1.64 |
| 11-02 | Gp4 Focus 2 | g.chr12:107279688G>A | Silent            | RIC8B   | p.E526E  | RIC8 guanine nucleotid          | 27 (0.00)   | 14 (0.43) | 1.14 |
| 11-02 | Gp4 Focus 2 | g.chr12:8926285G>A   | Missense Mutation | RIMKLB  | p.E356K  | ribosomal modification          | 27 (0.00)   | 44 (0.20) | 0.55 |
| 11-02 | Gp4 Focus 2 | g.chr6:72947580G>A   | Missense Mutation | RIMS1   | p.V638I  | regulating synaptic men         | 33 (0.00)   | 41 (0.59) | 1.56 |
| 11-02 | Gp4 Focus 2 | g.chr14:93022143G>A  | Missense Mutation | RIN3    | p.G31D   | Ras and Rab interactor          | 20 (0.00)   | 20 (0.30) | 0.80 |
| 11-02 | Gp4 Focus 2 | g.chr8:87498813C>T   | Missense Mutation | RMDN1   | p.S132N  | regulator of microtubule        | 68 (0.00)   | 35 (0.14) | 0.38 |
| 11-02 | Gp4 Focus 2 | g.chr1:182551299G>A  | Missense Mutation | RNASEL  | p.S554F  | ribonuclease L (2',5'-oli       | 39 (0.00)   | 22 (0.23) | 0.61 |
| 11-02 | Gp4 Focus 2 | g.chr2:86849829C>T   | Missense Mutation | RNF103  | p.G61R   | ring finger protein 103         | 114 (0.00)  | 55 (0.18) | 0.48 |
| 11-02 | Gp4 Focus 2 | g.chr15:59323874C>T  | Missense Mutation | RNF111  | p.H285Y  | ring finger protein 111         | 43 (0.00)   | 25 (0.36) | 0.96 |
| 11-02 | Gp4 Focus 2 | g.chr6:127608343G>A  | Silent            | RNF146  | p.E194E  | ring finger protein 146         | 37 (0.00)   | 71 (0.24) | 0.64 |
| 11-02 | Gp4 Focus 2 | g.chr4:141888948G>A  | Silent            | RNF150  | p.T188T  | ring finger protein 150         | 36 (0.00)   | 67 (0.22) | 1.02 |
| 11-02 | Gp4 Focus 2 | g.chr9:104307056G>A  | Silent            | RNF20   | p.L212L  | ring finger protein 20, E       | 61 (0.02)   | 52 (0.27) | 0.72 |
| 11-02 | Gp4 Focus 2 | g.chr9:104309484C>T  | Silent            | RNF20   | p.I320I  | ring finger protein 20, E       | 47 (0.00)   | 24 (0.29) | 0.78 |
| 11-02 | Gp4 Focus 2 | g.chr17:78328297G>T  | Nonsense Mutation | RNF213  | p.E3644* | ring finger protein 213         | 21 (0.00)   | 30 (0.27) | 0.71 |
| 11-02 | Gp4 Focus 2 | g.chr13:79190767G>A  | Missense Mutation | RNF219  | p.P377S  | ring finger protein 219         | 48 (0.00)   | 40 (0.38) | 1.00 |



|       |             |                     |                   |                |          |                           |           |            |      |
|-------|-------------|---------------------|-------------------|----------------|----------|---------------------------|-----------|------------|------|
| 11-02 | Gp4 Focus 2 | g.chr1:45101221G>A  | Silent            | RNF220         | p.R318R  | ring finger protein 220   | 30 (0.00) | 34 (0.32)  | 0.86 |
| 11-02 | Gp4 Focus 2 | g.chr2:219530710G>T | Missense Mutation | RNF25          | p.H168N  | ring finger protein 25    | 26 (0.00) | 20 (0.30)  | 0.80 |
| 11-02 | Gp4 Focus 2 | g.chr17:56437552G>A | Missense Mutation | RNF43          | p.H304Y  | ring finger protein 43    | 20 (0.00) | 41 (0.20)  | 0.52 |
| 11-02 | Gp4 Focus 2 | g.chr3:78685081G>A  | Missense Mutation | ROBO1          | p.P1072L | roundabout, axon guidance | 58 (0.00) | 65 (0.11)  | 0.56 |
| 11-02 | Gp4 Focus 2 | g.chr3:78685082G>A  | Missense Mutation | ROBO1          | p.P1072S | roundabout, axon guidance | 58 (0.00) | 65 (0.11)  | 0.56 |
| 11-02 | Gp4 Focus 2 | g.chr3:78987858C>T  | Missense Mutation | ROBO1          | p.R131H  | roundabout, axon guidance | 52 (0.00) | 35 (0.29)  | 1.50 |
| 11-02 | Gp4 Focus 2 | g.chr3:77530311G>A  | Missense Mutation | ROBO2          | p.C203Y  | roundabout, axon guidance | 31 (0.00) | 46 (0.15)  | 0.80 |
| 11-02 | Gp4 Focus 2 | g.chr9:94493213G>A  | Silent            | ROR2           | p.L388L  | receptor tyrosine kinase  | 19 (0.00) | 28 (0.21)  | 0.57 |
| 11-02 | Gp4 Focus 2 | g.chr15:72901180G>A | lincRNA           | RP11-1006G14.2 |          |                           | 24 (0.00) | 26 (0.27)  | 0.72 |
| 11-02 | Gp4 Focus 2 | g.chr12:57689233C>T | Silent            | RP11-123K3.4   | p.Q44Q   |                           | 81 (0.01) | 27 (0.70)  | 1.88 |
| 11-02 | Gp4 Focus 2 | g.chr12:57689286C>T | Missense Mutation | RP11-123K3.4   | p.E27K   |                           | 91 (0.00) | 44 (0.95)  | 2.55 |
| 11-02 | Gp4 Focus 2 | g.chr5:177059465C>T | RNA               | RP11-1277A3.2  |          |                           | 45 (0.00) | 28 (0.21)  | 0.57 |
| 11-02 | Gp4 Focus 2 | g.chr17:45131896C>A | RNA               | RP11-156P1.3   |          |                           | 16 (0.00) | 17 (0.35)  | 0.94 |
| 11-02 | Gp4 Focus 2 | g.chr17:45131915G>A | RNA               | RP11-156P1.3   |          |                           | 17 (0.00) | 25 (0.32)  | 0.85 |
| 11-02 | Gp4 Focus 2 | g.chr17:58050956C>T | lincRNA           | RP11-178C3.2   |          |                           | 35 (0.00) | 24 (0.21)  | 0.56 |
| 11-02 | Gp4 Focus 2 | g.chr10:28725880G>A | lincRNA           | RP11-351M16.3  |          |                           | 46 (0.00) | 18 (0.33)  | 1.12 |
| 11-02 | Gp4 Focus 2 | g.chr17:15501940G>C | Missense Mutation | RP11-385D13    | p.C797W  |                           | 31 (0.00) | 14 (0.57)  | 1.52 |
| 11-02 | Gp4 Focus 2 | g.chr14:39819370C>A | Missense Mutation | RP11-407N17    | p.P1308T |                           | 49 (0.00) | 16 (0.44)  | 1.39 |
| 11-02 | Gp4 Focus 2 | g.chr13:19761269G>A | Missense Mutation | RP11-408E5.4   | p.E15K   |                           | 31 (0.00) | 13 (0.54)  | 1.85 |
| 11-02 | Gp4 Focus 2 | g.chr5:989895G>A    | RNA               | RP11-43F13.3   |          |                           | 42 (0.00) | 51 (0.16)  | 0.42 |
| 11-02 | Gp4 Focus 2 | g.chr3:193721433C>T | lincRNA           | RP11-699L21.1  |          |                           | 20 (0.00) | 22 (0.32)  | 0.85 |
| 11-02 | Gp4 Focus 2 | g.chr12:56215786T>A | Splice Site       | RP11-762I7.5   | p.E324D  |                           | 45 (0.00) | 29 (0.31)  | 0.83 |
| 11-02 | Gp4 Focus 2 | g.chr17:43626732C>T | lincRNA           | RP11-798G7.6   |          |                           | 83 (0.00) | 42 (0.24)  | 0.63 |
| 11-02 | Gp4 Focus 2 | g.chr20:21143618G>A | RNA               | RP4-777D9.2    |          |                           | 35 (0.00) | 42 (0.26)  | 0.70 |
| 11-02 | Gp4 Focus 2 | g.chr1:149398931G>A | RNA               | RP5-998N21.10  |          |                           | 45 (0.00) | 35 (0.51)  | 1.37 |
| 11-02 | Gp4 Focus 2 | g.chr15:41827061T>A | Missense Mutation | RPAP1          | p.Q205L  | RNA polymerase II assoc   | 18 (0.00) | 35 (0.23)  | 0.61 |
| 11-02 | Gp4 Focus 2 | g.chr14:21793131C>T | Missense Mutation | RPGRIP1        | p.A706V  | retinitis pigmentosa GT   | 44 (0.00) | 12 (0.50)  | 0.73 |
| 11-02 | Gp4 Focus 2 | g.chr1:24022374G>A  | Silent            | RPL11          | p.E161E  | ribosomal protein L11     | 62 (0.00) | 57 (0.26)  | 0.70 |
| 11-02 | Gp4 Focus 2 | g.chr3:12881006G>A  | Silent            | RPL32          | p.G40G   | ribosomal protein L32     | 43 (0.00) | 21 (0.24)  | 0.63 |
| 11-02 | Gp4 Focus 2 | g.chr10:15145809G>A | Missense Mutation | RPP38          | p.E166K  | ribonuclease P/MRP 38     | 27 (0.00) | 20 (0.45)  | 1.51 |
| 11-02 | Gp4 Focus 2 | g.chr17:78727884G>A | Silent            | RPTOR          | p.L243L  | regulatory associated pr  | 45 (0.00) | 29 (0.17)  | 0.46 |
| 11-02 | Gp4 Focus 2 | g.chr9:19050133G>A  | Missense Mutation | RRAGA          | p.C159Y  | Ras-related GTP binding   | 19 (0.00) | 30 (0.23)  | 0.76 |
| 11-02 | Gp4 Focus 2 | g.chr9:19050487C>T  | Missense Mutation | RRAGA          | p.S277L  | Ras-related GTP binding   | 45 (0.00) | 23 (0.52)  | 1.70 |
| 11-02 | Gp4 Focus 2 | g.chr20:17622562G>A | Silent            | RRBP1          | p.A255A  | ribosome binding protei   | 31 (0.00) | 22 (0.68)  | 1.82 |
| 11-02 | Gp4 Focus 2 | g.chr10:99118340C>T | Missense Mutation | RRP12          | p.D1249N | ribosomal RNA process     | 60 (0.00) | 119 (0.20) | 0.54 |

|       |             |                      |                   |         |          |                                              |           |      |
|-------|-------------|----------------------|-------------------|---------|----------|----------------------------------------------|-----------|------|
| 11-02 | Gp4 Focus 2 | g.chr1:114310886G>A  | Missense Mutation | RSBN1   | p.T595M  | round spermatid basic p:44 (0.00)            | 23 (0.43) | 0.91 |
| 11-02 | Gp4 Focus 2 | g.chr7:77402564G>A   | Missense Mutation | RSBN1L  | p.G576R  | round spermatid basic p:87 (0.00)            | 38 (0.24) | 0.63 |
| 11-02 | Gp4 Focus 2 | g.chr7:5967973G>A    | Silent            | RSPH10B | p.V762V  | radial spoke head 10 hor:89 (0.00)           | 40 (0.72) | 2.60 |
| 11-02 | Gp4 Focus 2 | g.chr2:74654604C>T   | Missense Mutation | RTKN    | p.R351Q  | rhotekin 51 (0.00)                           | 24 (0.33) | 0.89 |
| 11-02 | Gp4 Focus 2 | g.chr2:55253055G>T   | Missense Mutation | RTN4    | p.P727Q  | reticulon 4 49 (0.00)                        | 23 (0.26) | 0.70 |
| 11-02 | Gp4 Focus 2 | g.chr2:55254517G>A   | Missense Mutation | RTN4    | p.P240S  | reticulon 4 20 (0.00)                        | 21 (0.43) | 1.14 |
| 11-02 | Gp4 Focus 2 | g.chr3:187416518G>A  | Missense Mutation | RTP2    | p.P149L  | receptor (chemosensory) 15 (0.00)            | 23 (0.52) | 1.39 |
| 11-02 | Gp4 Focus 2 | g.chr3:46542010C>A   | Missense Mutation | RTP3    | p.T107K  | receptor (chemosensory) 21 (0.00)            | 14 (0.57) | 1.52 |
| 11-02 | Gp4 Focus 2 | g.chr18:67692085C>T  | Splice Site       | RTTN    |          | rotatin 27 (0.00)                            | 33 (0.27) | 0.87 |
| 11-02 | Gp4 Focus 2 | g.chr21:36206846G>A  | Silent            | RUNX1   | p.S195S  | runt-related transcription factor 20 (0.00)  | 27 (0.22) | 0.59 |
| 11-02 | Gp4 Focus 2 | g.chr3:72457893G>A   | Intron            | RYBP    |          | RING1 and YY1 binding site 69 (0.00)         | 33 (0.15) | 0.40 |
| 11-02 | Gp4 Focus 2 | g.chr3:72483805G>A   | Intron            | RYBP    |          | RING1 and YY1 binding site 132 (0.00)        | 23 (0.35) | 0.93 |
| 11-02 | Gp4 Focus 2 | g.chr19:39034054G>A  | Silent            | RYR1    | p.V3919V | ryanodine receptor 1 (sk) 20 (0.00)          | 32 (0.81) | 2.17 |
| 11-02 | Gp4 Focus 2 | g.chr1:237817674G>A  | Missense Mutation | RYR2    | p.R2642K | ryanodine receptor 2 (ca) 35 (0.00)          | 15 (0.67) | 1.78 |
| 11-02 | Gp4 Focus 2 | g.chr1:237817676A>C  | Missense Mutation | RYR2    | p.K2643Q | ryanodine receptor 2 (ca) 35 (0.00)          | 15 (0.73) | 1.96 |
| 11-02 | Gp4 Focus 2 | g.chr1:237817677A>C  | Missense Mutation | RYR2    | p.K2643T | ryanodine receptor 2 (ca) 35 (0.00)          | 14 (0.71) | 1.90 |
| 11-02 | Gp4 Focus 2 | g.chr1:237817678G>T  | Missense Mutation | RYR2    | p.K2643N | ryanodine receptor 2 (ca) 36 (0.00)          | 14 (0.71) | 1.90 |
| 11-02 | Gp4 Focus 2 | g.chr15:33872261G>A  | Silent            | RYR3    | p.Q451Q  | ryanodine receptor 3 58 (0.00)               | 59 (0.22) | 0.59 |
| 11-02 | Gp4 Focus 2 | g.chr15:33961617G>A  | Silent            | RYR3    | p.E1894E | ryanodine receptor 3 108 (0.00)              | 34 (0.24) | 0.63 |
| 11-02 | Gp4 Focus 2 | g.chr15:34064280C>T  | Silent            | RYR3    | p.Y2992Y | ryanodine receptor 3 15 (0.00)               | 24 (0.54) | 1.44 |
| 11-02 | Gp4 Focus 2 | g.chr15:34113528G>A  | Missense Mutation | RYR3    | p.G3625S | ryanodine receptor 3 24 (0.00)               | 28 (0.21) | 0.57 |
| 11-02 | Gp4 Focus 2 | g.chr15:34117816G>A  | Silent            | RYR3    | p.L3695L | ryanodine receptor 3 75 (0.01)               | 79 (0.19) | 0.51 |
| 11-02 | Gp4 Focus 2 | g.chr1:153431423G>A  | Missense Mutation | S100A7  | p.R23C   | S100 calcium binding protein 22 (0.00)       | 17 (0.71) | 1.88 |
| 11-02 | Gp4 Focus 2 | g.chr13:23905233G>A  | Missense Mutation | SACS    | p.T4261I | sacsin molecular chaperone 45 (0.00)         | 14 (0.93) | 2.48 |
| 11-02 | Gp4 Focus 2 | g.chr2:128773983C>A  | Missense Mutation | SAP130  | p.A163S  | Sin3A-associated protein 43 (0.00)           | 17 (0.29) | 0.95 |
| 11-02 | Gp4 Focus 2 | g.chr2:200246464C>T  | Missense Mutation | SATB2   | p.M142I  | SATB homeobox 2 50 (0.00)                    | 35 (0.37) | 0.99 |
| 11-02 | Gp4 Focus 2 | g.chr12:123834862G>A | Nonsense Mutation | SBNO1   | p.Q43*   | strawberry notch homolog 31 (0.00)           | 54 (0.24) | 0.64 |
| 11-02 | Gp4 Focus 2 | g.chr12:123834975C>T | Missense Mutation | SBNO1   | p.G5E    | strawberry notch homolog 45 (0.00)           | 35 (0.14) | 0.38 |
| 11-02 | Gp4 Focus 2 | g.chr8:73993354C>T   | Silent            | SBSPON  | p.Q103Q  | somatomedin B and thrombospondin 36 (0.00)   | 23 (0.22) | 0.73 |
| 11-02 | Gp4 Focus 2 | g.chr6:155148329C>T  | Missense Mutation | SCAF8   | p.P699S  | SR-related CTD-associated factor 123 (0.00)  | 27 (0.22) | 0.59 |
| 11-02 | Gp4 Focus 2 | g.chr15:76696968C>T  | Missense Mutation | SCAPER  | p.V1122M | S-phase cyclin A-associated factor 44 (0.00) | 20 (0.25) | 0.67 |
| 11-02 | Gp4 Focus 2 | g.chr4:77095374G>A   | Missense Mutation | SCARB2  | p.S163L  | scavenger receptor class 100 100 (0.00)      | 32 (0.25) | 0.67 |
| 11-02 | Gp4 Focus 2 | g.chr15:32983961G>A  | Silent            | SCG5    | p.R180R  | secretogranin V (7B2 protein) 22 (0.00)      | 27 (0.41) | 1.09 |
| 11-02 | Gp4 Focus 2 | g.chr1:41494282G>A   | Missense Mutation | SCMH1   | p.P611S  | sex comb on midleg homolog 21 (0.00)         | 48 (0.19) | 0.50 |
| 11-02 | Gp4 Focus 2 | g.chr1:41512224G>A   | Silent            | SCMH1   | p.N441N  | sex comb on midleg homolog 32 (0.00)         | 16 (0.44) | 1.17 |

|       |             |                      |                   |           |          |                                            |           |      |
|-------|-------------|----------------------|-------------------|-----------|----------|--------------------------------------------|-----------|------|
| 11-02 | Gp4 Focus 2 | g.chrX:17768332G>A   | Missense Mutation | SCML1     | p.G208R  | sex comb on midleg-like 20 (0.00)          | 15 (0.53) | 0.89 |
| 11-02 | Gp4 Focus 2 | g.chr2:165986532G>A  | Missense Mutation | SCN3A     | p.T947I  | sodium channel, voltage 167 (0.00)         | 23 (0.43) | 1.16 |
| 11-02 | Gp4 Focus 2 | g.chr12:52096605C>T  | Silent            | SCN8A     | p.N347N  | sodium channel, voltage 48 (0.00)          | 43 (0.30) | 0.81 |
| 11-02 | Gp4 Focus 2 | g.chr12:52096641C>T  | Silent            | SCN8A     | p.A359A  | sodium channel, voltage 27 (0.00)          | 40 (0.35) | 0.93 |
| 11-02 | Gp4 Focus 2 | g.chr12:6458142C>T   | Silent            | SCNN1A    | p.Q532Q  | sodium channel, non-voltage 28 (0.00)      | 47 (0.38) | 1.02 |
| 11-02 | Gp4 Focus 2 | g.chr16:23364149G>A  | Silent            | SCNN1B    | p.K113K  | sodium channel, non-voltage 31 (0.00)      | 31 (0.19) | 0.52 |
| 11-02 | Gp4 Focus 2 | g.chr20:18794913G>T  | Missense Mutation | SCP2D1    | p.D152Y  | SCP2 sterol-binding domain 15 (0.00)       | 13 (0.46) | 1.23 |
| 11-02 | Gp4 Focus 2 | g.chr11:9077376G>A   | Nonsense Mutation | SCUBE2    | p.R391*  | signal peptide, CUB domain 76 (0.00)       | 25 (0.36) | 0.96 |
| 11-02 | Gp4 Focus 2 | g.chr4:76878792C>A   | Missense Mutation | SDAD1     | p.V550F  | SDA1 domain containing 129 (0.00)          | 25 (0.24) | 0.64 |
| 11-02 | Gp4 Focus 2 | g.chr7:3998593G>A    | Missense Mutation | SDK1      | p.S394N  | sidekick cell adhesion receptor 37 (0.00)  | 27 (0.48) | 1.72 |
| 11-02 | Gp4 Focus 2 | g.chr9:139354541G>A  | Nonsense Mutation | SEC16A    | p.Q1498* | SEC16 homolog A (S. cerevisiae) 19 (0.00)  | 35 (0.14) | 0.38 |
| 11-02 | Gp4 Focus 2 | g.chr9:139366513C>T  | Silent            | SEC16A    | p.A1028A | SEC16 homolog A (S. cerevisiae) 17 (0.00)  | 28 (0.25) | 0.67 |
| 11-02 | Gp4 Focus 2 | g.chr10:75519823G>A  | Missense Mutation | SEC24C    | p.G177S  | SEC24 family member 15 (0.00)              | 15 (0.40) | 1.07 |
| 11-02 | Gp4 Focus 2 | g.chr4:119745890C>A  | Missense Mutation | SEC24D    | p.A45S   | SEC24 family member 194 (0.00)             | 26 (0.38) | 1.03 |
| 11-02 | Gp4 Focus 2 | g.chr9:91964734G>A   | Silent            | SECISBP2  | p.E594E  | SECIS binding protein 226 (0.00)           | 27 (0.19) | 0.60 |
| 11-02 | Gp4 Focus 2 | g.chr14:81952684C>T  | Missense Mutation | SEL1L     | p.E583K  | sel-1 suppressor of lin-1 203 (0.00)       | 92 (0.15) | 0.41 |
| 11-02 | Gp4 Focus 2 | g.chr4:25836881C>T   | Silent            | SEL1L3    | p.K266K  | sel-1 suppressor of lin-1 73 (0.00)        | 20 (0.25) | 0.67 |
| 11-02 | Gp4 Focus 2 | g.chr1:169698692C>T  | Missense Mutation | SELE      | p.G280R  | selectin E 40 (0.00)                       | 47 (0.26) | 0.68 |
| 11-02 | Gp4 Focus 2 | g.chr1:169564016C>T  | Missense Mutation | SELP      | p.C734Y  | selectin P (granule membrane) 43 (0.00)    | 11 (0.82) | 2.18 |
| 11-02 | Gp4 Focus 2 | g.chr9:92017831C>T   | Silent            | SEMA4D    | p.A69A   | sema domain, immunoglobulin 18 (0.00)      | 29 (0.17) | 0.56 |
| 11-02 | Gp4 Focus 2 | g.chr10:102740355G>A | Missense Mutation | SEMA4G    | p.A458T  | sema domain, immunoglobulin 17 (0.00)      | 42 (0.21) | 0.57 |
| 11-02 | Gp4 Focus 2 | g.chr1:151107685C>T  | Missense Mutation | SEMA6C    | p.V512I  | sema domain, transmembrane 21 (0.00)       | 24 (0.38) | 1.00 |
| 11-02 | Gp4 Focus 2 | g.chr15:48057118G>A  | Missense Mutation | SEMA6D    | p.G431E  | sema domain, transmembrane 20 (0.00)       | 49 (0.14) | 0.38 |
| 11-02 | Gp4 Focus 2 | g.chr15:48063797C>T  | Nonsense Mutation | SEMA6D    | p.Q1013* | sema domain, transmembrane 36 (0.03)       | 15 (0.40) | 1.07 |
| 11-02 | Gp4 Focus 2 | g.chr3:185304253C>T  | Missense Mutation | SENP2     | p.R18W   | SUMO1/sentrin/SMT3 30 (0.00)               | 17 (0.35) | 0.94 |
| 11-02 | Gp4 Focus 2 | g.chr2:242283166G>A  | Splice Site       | SEPT2     |          | septin 2 62 (0.00)                         | 43 (0.26) | 0.68 |
| 11-02 | Gp4 Focus 2 | g.chr17:56602441C>A  | Missense Mutation | SEPT4     | p.E220D  | septin 4 69 (0.00)                         | 32 (0.50) | 1.33 |
| 11-02 | Gp4 Focus 2 | g.chrX:118759343C>T  | Splice Site       | SEPT6     |          | septin 6 32 (0.00)                         | 34 (0.21) | 0.46 |
| 11-02 | Gp4 Focus 2 | g.chr5:132097212G>A  | Silent            | SEPT8     | p.Y298Y  | septin 8 19 (0.00)                         | 30 (0.17) | 0.44 |
| 11-02 | Gp4 Focus 2 | g.chr19:48284375G>A  | Missense Mutation | SEPW1     | p.G40E   | selenoprotein W, 1 27 (0.00)               | 14 (0.64) | 1.71 |
| 11-02 | Gp4 Focus 2 | g.chr14:94914748G>A  | Missense Mutation | SERPINA11 | p.L122F  | serpin peptidase inhibitor class 44 (0.00) | 63 (0.30) | 0.80 |
| 11-02 | Gp4 Focus 2 | g.chr18:61233905A>G  | Silent            | SERPINB12 | p.E313E  | serpin peptidase inhibitor class 93 (0.00) | 27 (0.26) | 0.83 |
| 11-02 | Gp4 Focus 2 | g.chr18:61233934C>T  | Missense Mutation | SERPINB12 | p.T323I  | serpin peptidase inhibitor class 87 (0.01) | 37 (0.41) | 1.30 |
| 11-02 | Gp4 Focus 2 | g.chr18:61650824G>A  | Missense Mutation | SERPINB8  | p.E146K  | serpin peptidase inhibitor class 30 (0.00) | 29 (0.52) | 1.66 |
| 11-02 | Gp4 Focus 2 | g.chr2:224866479G>A  | Missense Mutation | SERPINE2  | p.P47S   | serpin peptidase inhibitor class 52 (0.00) | 24 (0.25) | 0.67 |

|       |             |                      |                   |          |          |                                     |           |      |
|-------|-------------|----------------------|-------------------|----------|----------|-------------------------------------|-----------|------|
| 11-02 | Gp4 Focus 2 | g.chr21:37418085C>A  | Missense Mutation | SETD4    | p.R174I  | SET domain containing 84 (0.00)     | 48 (0.40) | 1.06 |
| 11-02 | Gp4 Focus 2 | g.chr3:9483349G>A    | Missense Mutation | SETD5    | p.D295N  | SET domain containing 66 (0.00)     | 76 (0.24) | 0.63 |
| 11-02 | Gp4 Focus 2 | g.chr3:9490288G>A    | Missense Mutation | SETD5    | p.D774N  | SET domain containing 95 (0.00)     | 25 (0.84) | 2.24 |
| 11-02 | Gp4 Focus 2 | g.chr17:27284412G>A  | Silent            | SEZ6     | p.R816R  | seizure related 6 homolc 55 (0.00)  | 23 (0.48) | 1.28 |
| 11-02 | Gp4 Focus 2 | g.chr17:27306712C>T  | Missense Mutation | SEZ6     | p.G282S  | seizure related 6 homolc 27 (0.00)  | 27 (0.19) | 0.49 |
| 11-02 | Gp4 Focus 2 | g.chr22:26690391G>A  | Splice Site       | SEZ6L    | p.Q323Q  | seizure related 6 homolc 16 (0.00)  | 30 (0.17) | 0.44 |
| 11-02 | Gp4 Focus 2 | g.chr22:30741112G>A  | Missense Mutation | SF3A1    | p.A154V  | splicing factor 3a, subur 18 (0.00) | 22 (0.50) | 1.33 |
| 11-02 | Gp4 Focus 2 | g.chr11:65830985G>A  | Missense Mutation | SF3B2    | p.E717K  | splicing factor 3b, subur 86 (0.00) | 22 (0.50) | 1.33 |
| 11-02 | Gp4 Focus 2 | g.chr12:132210016C>T | Nonsense Mutation | SFSWAP   | p.Q225*  | splicing factor, suppress 22 (0.00) | 23 (0.30) | 0.81 |
| 11-02 | Gp4 Focus 2 | g.chr12:132210038C>T | Missense Mutation | SFSWAP   | p.A232V  | splicing factor, suppress 20 (0.00) | 19 (0.37) | 0.98 |
| 11-02 | Gp4 Focus 2 | g.chr10:102794464C>T | Missense Mutation | SFXN3    | p.P5S    | sideroflexin 3 114 (0.00)           | 31 (0.52) | 1.38 |
| 11-02 | Gp4 Focus 2 | g.chr6:134493353G>A  | Missense Mutation | SGK1     | p.S255F  | serum/glucocorticoid re; 25 (0.00)  | 34 (0.26) | 0.71 |
| 11-02 | Gp4 Focus 2 | g.chr2:201436345G>A  | Missense Mutation | SGOL2    | p.G426R  | shugoshin-like 2 (S. pon 99 (0.00)  | 28 (0.18) | 0.48 |
| 11-02 | Gp4 Focus 2 | g.chr12:111884969C>T | Silent            | SH2B3    | p.L323L  | SH2B adaptor protein 3 46 (0.00)    | 34 (0.35) | 0.94 |
| 11-02 | Gp4 Focus 2 | g.chr12:111885157G>A | Missense Mutation | SH2B3    | p.D349N  | SH2B adaptor protein 3 22 (0.00)    | 27 (0.19) | 0.49 |
| 11-02 | Gp4 Focus 2 | g.chr19:6754998C>T   | Silent            | SH2D3A   | p.Q275Q  | SH2 domain containing 27 (0.00)     | 33 (0.27) | 0.73 |
| 11-02 | Gp4 Focus 2 | g.chr8:19190612G>A   | Missense Mutation | SH2D4A   | p.A65T   | SH2 domain containing 15 (0.00)     | 25 (0.20) | 0.53 |
| 11-02 | Gp4 Focus 2 | g.chr4:152095913C>A  | Silent            | SH3D19   | p.V201V  | SH3 domain containing 63 (0.02)     | 22 (0.23) | 0.61 |
| 11-02 | Gp4 Focus 2 | g.chr5:171773145C>T  | Missense Mutation | SH3PXD2B | p.V395I  | SH3 and PX domains 2I 23 (0.00)     | 29 (0.41) | 1.10 |
| 11-02 | Gp4 Focus 2 | g.chr4:170038696C>T  | Silent            | SH3RF1   | p.Q585Q  | SH3 domain containing 76 (0.00)     | 36 (0.19) | 0.66 |
| 11-02 | Gp4 Focus 2 | g.chr4:170077629G>A  | Missense Mutation | SH3RF1   | p.P199S  | SH3 domain containing 136 (0.00)    | 45 (0.16) | 0.53 |
| 11-02 | Gp4 Focus 2 | g.chr5:148386538G>A  | Missense Mutation | SH3TC2   | p.S1187F | SH3 domain and tetratri 17 (0.00)   | 31 (0.19) | 0.52 |
| 11-02 | Gp4 Focus 2 | g.chr5:148386558G>A  | Silent            | SH3TC2   | p.D1180D | SH3 domain and tetratri 16 (0.00)   | 29 (0.24) | 0.64 |
| 11-02 | Gp4 Focus 2 | g.chr5:148407915C>T  | Silent            | SH3TC2   | p.Q453Q  | SH3 domain and tetratri 56 (0.00)   | 31 (0.35) | 0.95 |
| 11-02 | Gp4 Focus 2 | g.chr17:18238894G>A  | Missense Mutation | SHMT1    | p.P304S  | serine hydroxymethyltra 64 (0.00)   | 52 (0.29) | 0.77 |
| 11-02 | Gp4 Focus 2 | g.chr10:112724328C>T | Missense Mutation | SHOC2    | p.T71M   | soc-2 suppressor of clea 39 (0.00)  | 59 (0.25) | 0.68 |
| 11-02 | Gp4 Focus 2 | g.chr17:3526745G>A   | Missense Mutation | SHPK     | p.H179Y  | sedoheptulokinase 28 (0.00)         | 12 (0.50) | 1.33 |
| 11-02 | Gp4 Focus 2 | g.chr3:72802708C>A   | Intron            | SHQ1     |          | SHQ1, H/ACA ribonucl 67 (0.00)      | 20 (0.25) | 0.67 |
| 11-02 | Gp4 Focus 2 | g.chr3:72823993C>T   | Intron            | SHQ1     |          | SHQ1, H/ACA ribonucl 56 (0.00)      | 54 (0.19) | 0.49 |
| 11-02 | Gp4 Focus 2 | g.chr3:72842413C>T   | Intron            | SHQ1     |          | SHQ1, H/ACA ribonucl 29 (0.00)      | 26 (0.19) | 0.51 |
| 11-02 | Gp4 Focus 2 | g.chr3:72859928C>T   | Intron            | SHQ1     |          | SHQ1, H/ACA ribonucl 91 (0.00)      | 22 (0.50) | 1.33 |
| 11-02 | Gp4 Focus 2 | g.chr3:72861424T>C   | Intron            | SHQ1     |          | SHQ1, H/ACA ribonucl 186 (0.00)     | 20 (0.35) | 0.93 |
| 11-02 | Gp4 Focus 2 | g.chr3:72871584G>A   | Intron            | SHQ1     |          | SHQ1, H/ACA ribonucl 65 (0.00)      | 49 (0.18) | 0.49 |
| 11-02 | Gp4 Focus 2 | g.chr3:72875175C>T   | Intron            | SHQ1     |          | SHQ1, H/ACA ribonucl 42 (0.00)      | 23 (0.26) | 0.70 |
| 11-02 | Gp4 Focus 2 | g.chr3:72878627C>T   | Intron            | SHQ1     |          | SHQ1, H/ACA ribonucl 38 (0.00)      | 12 (0.58) | 1.56 |

|       |             |                      |                   |          |          |                            |            |           |      |
|-------|-------------|----------------------|-------------------|----------|----------|----------------------------|------------|-----------|------|
| 11-02 | Gp4 Focus 2 | g.chr3:72880811G>A   | Intron            | SHQ1     |          | SHQ1, H/ACA ribonucl       | 211 (0.00) | 46 (0.33) | 0.87 |
| 11-02 | Gp4 Focus 2 | g.chr3:72886427G>A   | Intron            | SHQ1     |          | SHQ1, H/ACA ribonucl       | 44 (0.00)  | 19 (0.42) | 1.12 |
| 11-02 | Gp4 Focus 2 | g.chr3:72895662C>T   | Intron            | SHQ1     |          | SHQ1, H/ACA ribonucl       | 36 (0.00)  | 24 (0.21) | 0.56 |
| 11-02 | Gp4 Focus 2 | g.chr5:132159573C>T  | Missense Mutation | SHROOM1  | p.G594R  | shroom family member       | 18 (0.00)  | 23 (0.39) | 1.04 |
| 11-02 | Gp4 Focus 2 | g.chr4:77670216C>T   | Missense Mutation | SHROOM3  | p.P1267L | shroom family member       | 85 (0.00)  | 21 (0.29) | 0.76 |
| 11-02 | Gp4 Focus 2 | g.chr4:77691985G>A   | Silent            | SHROOM3  | p.S1852S | shroom family member       | 23 (0.00)  | 32 (0.19) | 0.50 |
| 11-02 | Gp4 Focus 2 | g.chr11:124530539C>T | Silent            | SIAE     | p.Q130Q  | sialic acid acetylerase    | 53 (0.02)  | 30 (0.20) | 0.53 |
| 11-02 | Gp4 Focus 2 | g.chr11:117063874C>A | Missense Mutation | SIDT2    | p.A704D  | SID1 transmembrane fa      | 36 (0.00)  | 48 (0.23) | 0.61 |
| 11-02 | Gp4 Focus 2 | g.chr19:51914589G>A  | Missense Mutation | SIGLEC10 | p.P477S  | sialic acid binding Ig-lik | 28 (0.00)  | 33 (0.15) | 0.40 |
| 11-02 | Gp4 Focus 2 | g.chr5:175740810C>T  | Silent            | SIMC1    | p.N183N  | SUMO-interacting moti      | 28 (0.00)  | 27 (0.33) | 0.89 |
| 11-02 | Gp4 Focus 2 | g.chr5:175740821C>T  | Missense Mutation | SIMC1    | p.S187F  | SUMO-interacting moti      | 28 (0.00)  | 24 (0.38) | 1.00 |
| 11-02 | Gp4 Focus 2 | g.chr15:75715144G>A  | Silent            | SIN3A    | p.S70S   | SIN3 transcription regul   | 21 (0.00)  | 34 (0.18) | 0.47 |
| 11-02 | Gp4 Focus 2 | g.chr1:232581482C>T  | Missense Mutation | SIPA1L2  | p.S1049N | signal-induced prolifera   | 48 (0.00)  | 87 (0.32) | 0.86 |
| 11-02 | Gp4 Focus 2 | g.chr6:13599387G>A   | Splice Site       | SIRT5    | p.V247V  | sirtuin 5                  | 19 (0.00)  | 33 (0.15) | 0.59 |
| 11-02 | Gp4 Focus 2 | g.chr13:78320946C>T  | Missense Mutation | SLAIN1   | p.P120L  | SLAIN motif family, m      | 16 (0.00)  | 19 (0.26) | 0.70 |
| 11-02 | Gp4 Focus 2 | g.chr4:48384828G>A   | Missense Mutation | SLAIN2   | p.R369Q  | SLAIN motif family, m      | 55 (0.00)  | 18 (0.28) | 0.74 |
| 11-02 | Gp4 Focus 2 | g.chr1:160719697C>T  | Missense Mutation | SLAMF7   | p.H155Y  | SLAM family member         | 41 (0.00)  | 60 (0.17) | 0.44 |
| 11-02 | Gp4 Focus 2 | g.chr1:159799727G>A  | Missense Mutation | SLAMF8   | p.A38T   | SLAM family member         | 63 (0.00)  | 75 (0.16) | 0.43 |
| 11-02 | Gp4 Focus 2 | g.chr1:159799748G>A  | Missense Mutation | SLAMF8   | p.V45I   | SLAM family member         | 62 (0.00)  | 74 (0.15) | 0.40 |
| 11-02 | Gp4 Focus 2 | g.chr4:87744924C>T   | Missense Mutation | SLC10A6  | p.G351S  | solute carrier family 10   | 45 (0.00)  | 13 (0.38) | 1.03 |
| 11-02 | Gp4 Focus 2 | g.chr2:219249975C>T  | Missense Mutation | SLC11A1  | p.L127F  | solute carrier family 11   | 29 (0.00)  | 56 (0.21) | 0.57 |
| 11-02 | Gp4 Focus 2 | g.chr2:219249977C>T  | Silent            | SLC11A1  | p.L127L  | solute carrier family 11   | 30 (0.00)  | 54 (0.22) | 0.59 |
| 11-02 | Gp4 Focus 2 | g.chr16:67985173G>A  | Silent            | SLC12A4  | p.D389D  | solute carrier family 12   | 17 (0.00)  | 16 (0.31) | 0.83 |
| 11-02 | Gp4 Focus 2 | g.chr20:44676101C>T  | Missense Mutation | SLC12A5  | p.S599F  | solute carrier family 12   | 28 (0.00)  | 21 (0.38) | 1.02 |
| 11-02 | Gp4 Focus 2 | g.chr15:34546570G>A  | Missense Mutation | SLC12A6  | p.S366F  | solute carrier family 12   | 34 (0.00)  | 51 (0.27) | 0.73 |
| 11-02 | Gp4 Focus 2 | g.chr15:34546598C>T  | Missense Mutation | SLC12A6  | p.A357T  | solute carrier family 12   | 35 (0.00)  | 44 (0.20) | 0.55 |
| 11-02 | Gp4 Focus 2 | g.chr7:135387599G>A  | Silent            | SLC13A4  | p.H208H  | solute carrier family 13   | 15 (0.00)  | 14 (0.36) | 0.95 |
| 11-02 | Gp4 Focus 2 | g.chr3:121648195G>A  | Splice Site       | SLC15A2  | p.R518K  | solute carrier family 15   | 28 (0.00)  | 29 (0.21) | 0.55 |
| 11-02 | Gp4 Focus 2 | g.chr10:91192990C>T  | Missense Mutation | SLC16A12 | p.R461K  | solute carrier family 16,  | 43 (0.00)  | 19 (0.53) | 1.40 |
| 11-02 | Gp4 Focus 2 | g.chr6:25850814G>A   | Missense Mutation | SLC17A3  | p.A289V  | solute carrier family 17   | 36 (0.00)  | 15 (0.80) | 2.13 |
| 11-02 | Gp4 Focus 2 | g.chr8:20022565C>A   | Silent            | SLC18A1  | p.V304V  | solute carrier family 18   | 15 (0.00)  | 22 (0.27) | 0.73 |
| 11-02 | Gp4 Focus 2 | g.chr6:133097533G>A  | Silent            | SLC18B1  | p.F277F  | solute carrier family 18,  | 32 (0.00)  | 39 (0.36) | 0.96 |
| 11-02 | Gp4 Focus 2 | g.chr6:133100511G>A  | Silent            | SLC18B1  | p.L231L  | solute carrier family 18,  | 16 (0.00)  | 33 (0.33) | 0.89 |
| 11-02 | Gp4 Focus 2 | g.chr9:4573949C>T    | Silent            | SLC1A1   | p.I270I  | solute carrier family 1    | 80 (0.00)  | 27 (0.30) | 0.79 |
| 11-02 | Gp4 Focus 2 | g.chr9:4585519G>A    | Silent            | SLC1A1   | p.K512K  | solute carrier family 1    | 26 (0.00)  | 21 (0.81) | 2.16 |

|       |             |                      |                   |          |         |                                      |           |      |
|-------|-------------|----------------------|-------------------|----------|---------|--------------------------------------|-----------|------|
| 11-02 | Gp4 Focus 2 | g.chr5:36686270G>A   | Missense Mutation | SLC1A3   | p.G510S | solute carrier family 1 (ε83 (0.00)  | 27 (0.22) | 0.59 |
| 11-02 | Gp4 Focus 2 | g.chr2:113405315G>A  | Splice Site       | SLC20A1  | p.K187K | solute carrier family 20 (100 (0.00) | 12 (0.67) | 1.78 |
| 11-02 | Gp4 Focus 2 | g.chr11:63065107A>T  | Silent            | SLC22A10 | p.I246I | solute carrier family 22, 53 (0.00)  | 17 (0.41) | 1.10 |
| 11-02 | Gp4 Focus 2 | g.chr6:3416009T>A    | Silent            | SLC22A23 | p.L245L | solute carrier family 22, 71 (0.00)  | 12 (0.83) | 1.59 |
| 11-02 | Gp4 Focus 2 | g.chr15:65943220C>T  | Silent            | SLC24A1  | p.Y911Y | solute carrier family 24 (18 (0.00)  | 85 (0.52) | 1.38 |
| 11-02 | Gp4 Focus 2 | g.chr15:48426504C>A  | Silent            | SLC24A5  | p.G117G | solute carrier family 24 (77 (0.00)  | 17 (0.29) | 0.78 |
| 11-02 | Gp4 Focus 2 | g.chr2:172644153G>A  | Missense Mutation | SLC25A12 | p.S588F | solute carrier family 25 (84 (0.00)  | 47 (0.66) | 1.76 |
| 11-02 | Gp4 Focus 2 | g.chr6:46637902G>A   | Silent            | SLC25A27 | p.L245L | solute carrier family 25, 21 (0.00)  | 13 (0.38) | 1.03 |
| 11-02 | Gp4 Focus 2 | g.chr14:100795944G>A | Missense Mutation | SLC25A47 | p.E297K | solute carrier family 25, 20 (0.00)  | 13 (0.38) | 1.03 |
| 11-02 | Gp4 Focus 2 | g.chr5:135215670G>A  | Missense Mutation | SLC25A48 | p.G222D | solute carrier family 25, 29 (0.00)  | 32 (0.16) | 0.42 |
| 11-02 | Gp4 Focus 2 | g.chr12:58016900G>A  | Missense Mutation | SLC26A10 | p.D345N | solute carrier family 26, 15 (0.00)  | 33 (0.30) | 0.81 |
| 11-02 | Gp4 Focus 2 | g.chr1:205904837G>A  | Missense Mutation | SLC26A9  | p.R38C  | solute carrier family 26 (23 (0.00)  | 19 (0.42) | 1.12 |
| 11-02 | Gp4 Focus 2 | g.chr15:85438274G>A  | Silent            | SLC28A1  | p.L127L | solute carrier family 28 (15 (0.00)  | 14 (0.71) | 1.90 |
| 11-02 | Gp4 Focus 2 | g.chr12:8074021G>A   | Silent            | SLC2A3   | p.T493T | solute carrier family 2 (122 (0.00)  | 31 (0.26) | 0.69 |
| 11-02 | Gp4 Focus 2 | g.chr12:8078497C>T   | Silent            | SLC2A3   | p.E303E | solute carrier family 2 (151 (0.00)  | 27 (0.26) | 0.69 |
| 11-02 | Gp4 Focus 2 | g.chr5:176824946C>T  | Missense Mutation | SLC34A1  | p.P527S | solute carrier family 34 (20 (0.00)  | 27 (0.33) | 0.89 |
| 11-02 | Gp4 Focus 2 | g.chr5:176825006C>T  | Missense Mutation | SLC34A1  | p.P547S | solute carrier family 34 (21 (0.00)  | 28 (0.18) | 0.48 |
| 11-02 | Gp4 Focus 2 | g.chr4:25671408G>A   | Missense Mutation | SLC34A2  | p.D259N | solute carrier family 34 (35 (0.00)  | 45 (0.42) | 1.13 |
| 11-02 | Gp4 Focus 2 | g.chr9:99106199C>T   | Missense Mutation | SLC35D2  | p.G224E | solute carrier family 35 (145 (0.00) | 59 (0.27) | 0.72 |
| 11-02 | Gp4 Focus 2 | g.chr5:150701702G>A  | Missense Mutation | SLC36A2  | p.A362V | solute carrier family 36 (33 (0.00)  | 52 (0.48) | 1.28 |
| 11-02 | Gp4 Focus 2 | g.chr5:150668001G>A  | Silent            | SLC36A3  | p.T145T | solute carrier family 36, 25 (0.00)  | 24 (0.58) | 1.56 |
| 11-02 | Gp4 Focus 2 | g.chr2:165772431C>T  | Missense Mutation | SLC38A11 | p.V168I | solute carrier family 38, 27 (0.00)  | 23 (0.26) | 0.70 |
| 11-02 | Gp4 Focus 2 | g.chr5:54922437A>G   | Missense Mutation | SLC38A9  | p.L461P | solute carrier family 38, 98 (0.00)  | 34 (0.18) | 0.59 |
| 11-02 | Gp4 Focus 2 | g.chr18:33702193G>A  | Missense Mutation | SLC39A6  | p.P394L | solute carrier family 39 (82 (0.00)  | 23 (0.30) | 0.81 |
| 11-02 | Gp4 Focus 2 | g.chr18:33703559G>A  | Missense Mutation | SLC39A6  | p.P347S | solute carrier family 39 (116 (0.00) | 77 (0.23) | 0.62 |
| 11-02 | Gp4 Focus 2 | g.chr11:62651959G>A  | Missense Mutation | SLC3A2   | p.V280M | solute carrier family 3 (ε30 (0.00)  | 55 (0.27) | 0.73 |
| 11-02 | Gp4 Focus 2 | g.chr2:190428380C>T  | Silent            | SLC40A1  | p.E444E | solute carrier family 40 (33 (0.00)  | 10 (0.50) | 1.33 |
| 11-02 | Gp4 Focus 2 | g.chr1:205760742G>A  | Silent            | SLC41A1  | p.D487D | solute carrier family 41 (17 (0.00)  | 31 (0.19) | 0.52 |
| 11-02 | Gp4 Focus 2 | g.chr8:142221615G>A  | Missense Mutation | SLC45A4  | p.P775S | solute carrier family 45, 49 (0.00)  | 19 (0.42) | 1.12 |
| 11-02 | Gp4 Focus 2 | g.chr8:142231719G>A  | Silent            | SLC45A4  | p.G78G  | solute carrier family 45, 18 (0.00)  | 41 (0.20) | 0.52 |
| 11-02 | Gp4 Focus 2 | g.chr2:162730490G>A  | Missense Mutation | SLC4A10  | p.G308E | solute carrier family 4, s72 (0.00)  | 50 (0.44) | 1.17 |
| 11-02 | Gp4 Focus 2 | g.chr2:162735649G>A  | Silent            | SLC4A10  | p.L319L | solute carrier family 4, s24 (0.00)  | 23 (0.22) | 0.58 |
| 11-02 | Gp4 Focus 2 | g.chr4:72319263C>T   | Silent            | SLC4A4   | p.A458A | solute carrier family 4 (ε64 (0.00)  | 29 (0.34) | 0.92 |
| 11-02 | Gp4 Focus 2 | g.chr12:51888798G>T  | Missense Mutation | SLC4A8   | p.V947L | solute carrier family 4, s39 (0.00)  | 42 (0.14) | 0.38 |
| 11-02 | Gp4 Focus 2 | g.chr17:4937369G>A   | Silent            | SLC52A1  | p.L139L | solute carrier family 52 (20 (0.00)  | 14 (0.71) | 1.90 |

|       |             |                      |                   |         |          |                                     |           |      |
|-------|-------------|----------------------|-------------------|---------|----------|-------------------------------------|-----------|------|
| 11-02 | Gp4 Focus 2 | g.chr17:18863885C>T  | Nonsense Mutation | SLC5A10 | p.Q125*  | solute carrier family 5 (ε34 (0.00) | 54 (0.17) | 0.44 |
| 11-02 | Gp4 Focus 2 | g.chr17:18863902C>T  | Silent            | SLC5A10 | p.G130G  | solute carrier family 5 (ε33 (0.00) | 51 (0.18) | 0.47 |
| 11-02 | Gp4 Focus 2 | g.chr12:101555779C>T | Missense Mutation | SLC5A8  | p.V535M  | solute carrier family 5 (ε22 (0.00) | 22 (0.36) | 0.97 |
| 11-02 | Gp4 Focus 2 | g.chr19:49797102G>A  | Missense Mutation | SLC6A16 | p.H534Y  | solute carrier family 6, r83 (0.00) | 21 (0.38) | 1.02 |
| 11-02 | Gp4 Focus 2 | g.chr19:49797112G>A  | Silent            | SLC6A16 | p.F530F  | solute carrier family 6, r84 (0.00) | 21 (0.33) | 0.89 |
| 11-02 | Gp4 Focus 2 | g.chr17:28548782C>T  | Silent            | SLC6A4  | p.A65A   | solute carrier family 6 (r17 (0.00) | 32 (0.41) | 1.08 |
| 11-02 | Gp4 Focus 2 | g.chr3:14489139C>T   | Silent            | SLC6A6  | p.Y138Y  | solute carrier family 6 (r80 (0.00) | 42 (0.14) | 0.38 |
| 11-02 | Gp4 Focus 2 | g.chr16:68309072C>T  | Missense Mutation | SLC7A6  | p.A148V  | solute carrier family 7 (ε41 (0.00) | 30 (0.17) | 0.44 |
| 11-02 | Gp4 Focus 2 | g.chr16:68328643C>T  | Missense Mutation | SLC7A6  | p.P353L  | solute carrier family 7 (ε41 (0.02) | 60 (0.15) | 0.40 |
| 11-02 | Gp4 Focus 2 | g.chr12:113758238C>T | Missense Mutation | SLC8B1  | p.A198T  | solute carrier family 8 (ε44 (0.00) | 36 (0.28) | 0.74 |
| 11-02 | Gp4 Focus 2 | g.chr3:143212577G>A  | Silent            | SLC9A9  | p.N411N  | solute carrier family 9, s62 (0.00) | 18 (0.72) | 1.93 |
| 11-02 | Gp4 Focus 2 | g.chr20:61299474C>T  | Silent            | SLCO4A1 | p.F583F  | solute carrier organic an 88 (0.01) | 20 (0.45) | 1.20 |
| 11-02 | Gp4 Focus 2 | g.chr17:33585892G>A  | Silent            | SLFN5   | p.E61E   | schlafen family member 33 (0.00)    | 17 (0.35) | 0.94 |
| 11-02 | Gp4 Focus 2 | g.chr5:168175361C>T  | Missense Mutation | SLIT3   | p.S739N  | slit homolog 3 (Drosoph 16 (0.00)   | 36 (0.17) | 0.44 |
| 11-02 | Gp4 Focus 2 | g.chrX:144904539C>T  | Missense Mutation | SLITRK2 | p.A199V  | SLIT and NTRK-like fa 21 (0.00)     | 12 (0.50) | 1.20 |
| 11-02 | Gp4 Focus 2 | g.chr3:164907002G>A  | Silent            | SLITRK3 | p.F539F  | SLIT and NTRK-like fa 27 (0.00)     | 13 (0.54) | 1.44 |
| 11-02 | Gp4 Focus 2 | g.chr13:86369794G>C  | Missense Mutation | SLITRK6 | p.H284D  | SLIT and NTRK-like fa 16 (0.00)     | 11 (0.45) | 1.21 |
| 11-02 | Gp4 Focus 2 | g.chr10:105770621C>T | Silent            | SLK     | p.L944L  | STE20-like kinase 16 (0.00)         | 18 (0.28) | 0.74 |
| 11-02 | Gp4 Focus 2 | g.chr9:2058440A>G    | Silent            | SMARCA2 | p.E499E  | SWI/SNF related, matri:41 (0.00)    | 20 (0.35) | 0.93 |
| 11-02 | Gp4 Focus 2 | g.chr9:2096659G>T    | Silent            | SMARCA2 | p.V962V  | SWI/SNF related, matri:29 (0.00)    | 24 (0.29) | 0.78 |
| 11-02 | Gp4 Focus 2 | g.chr17:61914290G>A  | Missense Mutation | SMARCD2 | p.P187S  | SWI/SNF related, matri:74 (0.00)    | 67 (0.15) | 0.40 |
| 11-02 | Gp4 Focus 2 | g.chr18:2703863G>A   | Silent            | SMCHD1  | p.K607K  | structural maintenance c89 (0.01)   | 33 (0.21) | 0.57 |
| 11-02 | Gp4 Focus 2 | g.chr16:18826862T>A  | Missense Mutation | SMG1    | p.T3472S | SMG1 phosphatidylinos 88 (0.00)     | 29 (0.34) | 0.92 |
| 11-02 | Gp4 Focus 2 | g.chr17:2202277G>A   | Silent            | SMG6    | p.N590N  | SMG6 nonsense mediatr 51 (0.00)     | 24 (0.25) | 0.67 |
| 11-02 | Gp4 Focus 2 | g.chr22:31485737C>T  | Missense Mutation | SMTN    | p.P175L  | smoothelin 17 (0.00)                | 15 (0.53) | 1.42 |
| 11-02 | Gp4 Focus 2 | g.chr17:62543816T>A  | Missense Mutation | SMURF2  | p.K658I  | SMAD specific E3 ubiq 35 (0.00)     | 25 (0.24) | 0.64 |
| 11-02 | Gp4 Focus 2 | g.chr2:88390582G>A   | Missense Mutation | SMYD1   | p.G194S  | SET and MYND domain 27 (0.00)       | 20 (0.80) | 2.13 |
| 11-02 | Gp4 Focus 2 | g.chr6:84291985C>T   | Missense Mutation | SNAP91  | p.G702E  | synaptosomal-associate 64 (0.00)    | 16 (0.31) | 0.83 |
| 11-02 | Gp4 Focus 2 | g.chr19:7986350G>A   | Missense Mutation | SNAPC2  | p.E76K   | small nuclear RNA activ 16 (0.00)   | 29 (0.21) | 0.55 |
| 11-02 | Gp4 Focus 2 | g.chr7:127484428G>A  | Missense Mutation | SND1    | p.V432M  | staphylococcal nuclease 27 (0.00)   | 41 (0.29) | 0.78 |
| 11-02 | Gp4 Focus 2 | g.chr17:47014458C>T  | Silent            | SNF8    | p.L91L   | SNF8, ESCRT-II compl 42 (0.00)      | 24 (0.67) | 1.78 |
| 11-02 | Gp4 Focus 2 | g.chr15:25422050C>T  | RNA               | SNHG14  |          | small nucleolar RNA ho46 (0.00)     | 34 (0.47) | 1.73 |
| 11-02 | Gp4 Focus 2 | g.chr15:25423974G>A  | RNA               | SNHG14  |          | small nucleolar RNA ho24 (0.00)     | 28 (0.39) | 1.45 |
| 11-02 | Gp4 Focus 2 | g.chr15:25436593G>A  | RNA               | SNHG14  |          | small nucleolar RNA ho20 (0.00)     | 24 (0.29) | 1.08 |
| 11-02 | Gp4 Focus 2 | g.chr15:25481304G>A  | RNA               | SNHG14  |          | small nucleolar RNA ho46 (0.00)     | 34 (0.76) | 2.82 |

|       |             |                      |                   |           |          |                                            |           |      |
|-------|-------------|----------------------|-------------------|-----------|----------|--------------------------------------------|-----------|------|
| 11-02 | Gp4 Focus 2 | g.chr2:96953260T>G   | Missense Mutation | SNRNP200  | p.K1134T | small nuclear ribonucleoprotein 50 (0.00)  | 11 (0.45) | 1.21 |
| 11-02 | Gp4 Focus 2 | g.chr2:96970560G>A   | Missense Mutation | SNRNP200  | p.T31I   | small nuclear ribonucleoprotein 20 (0.00)  | 15 (0.40) | 1.07 |
| 11-02 | Gp4 Focus 2 | g.chr19:49589702G>A  | Missense Mutation | SNRNP70   | p.A11T   | small nuclear ribonucleoprotein 77 (0.00)  | 55 (0.29) | 0.78 |
| 11-02 | Gp4 Focus 2 | g.chr8:51449338C>T   | Missense Mutation | SNTG1     | p.S217F  | syntrophin, gamma 1 19 (0.00)              | 25 (0.32) | 1.08 |
| 11-02 | Gp4 Focus 2 | g.chr17:46198800G>A  | Missense Mutation | SNX11     | p.R248K  | sorting nexin 11 16 (0.00)                 | 17 (0.53) | 1.41 |
| 11-02 | Gp4 Focus 2 | g.chr11:130748419G>A | Silent            | SNX19     | p.I959I  | sorting nexin 19 28 (0.00)                 | 17 (0.29) | 0.78 |
| 11-02 | Gp4 Focus 2 | g.chr16:29370697A>T  | RNA               | SNX29P2   |          | sorting nexin 29 pseudogene 21 (0.00)      | 24 (0.33) | 0.89 |
| 11-02 | Gp4 Focus 2 | g.chr16:29370717G>T  | RNA               | SNX29P2   |          | sorting nexin 29 pseudogene 20 (0.00)      | 17 (0.29) | 0.78 |
| 11-02 | Gp4 Focus 2 | g.chr9:115580049G>A  | Nonsense Mutation | SNX30     | p.W138*  | sorting nexin family member 39 (0.00)      | 40 (0.20) | 0.53 |
| 11-02 | Gp4 Focus 2 | g.chr10:97096742G>A  | Missense Mutation | SORBS1    | p.H1059Y | sorbin and SH3 domain 17 (0.00)            | 41 (0.39) | 1.04 |
| 11-02 | Gp4 Focus 2 | g.chr4:186598439T>A  | Silent            | SORBS2    | p.L68L   | sorbin and SH3 domain 226 (0.00)           | 43 (0.21) | 0.56 |
| 11-02 | Gp4 Focus 2 | g.chr1:109888416C>T  | Missense Mutation | SORT1     | p.G307D  | sortilin 1 128 (0.00)                      | 41 (0.22) | 0.46 |
| 11-02 | Gp4 Focus 2 | g.chr1:109888424G>A  | Silent            | SORT1     | p.Y304Y  | sortilin 1 125 (0.00)                      | 41 (0.22) | 0.46 |
| 11-02 | Gp4 Focus 2 | g.chr2:39262634G>A   | Missense Mutation | SOS1      | p.A291V  | son of sevenless homolog 34 (0.00)         | 17 (0.35) | 0.94 |
| 11-02 | Gp4 Focus 2 | g.chr5:157065477T>C  | Silent            | SOX30     | p.S547S  | SRY (sex determining region Y) 31 (0.00)   | 14 (0.36) | 0.95 |
| 11-02 | Gp4 Focus 2 | g.chr2:231037654C>T  | Missense Mutation | SP110     | p.E538K  | SP110 nuclear body protein 39 (0.00)       | 26 (0.27) | 0.72 |
| 11-02 | Gp4 Focus 2 | g.chr2:174819720G>A  | Missense Mutation | SP3       | p.T507I  | Sp3 transcription factor 52 (0.00)         | 21 (0.24) | 0.63 |
| 11-02 | Gp4 Focus 2 | g.chr1:118509308G>A  | Silent            | SPAG17    | p.A2152A | sperm associated antigen 61 (0.00)         | 56 (0.20) | 0.41 |
| 11-02 | Gp4 Focus 2 | g.chr1:118629585G>A  | Missense Mutation | SPAG17    | p.P469L  | sperm associated antigen 44 (0.00)         | 17 (0.29) | 0.61 |
| 11-02 | Gp4 Focus 2 | g.chr17:49054496C>T  | Missense Mutation | SPAG9     | p.V1152I | sperm associated antigen 107 (0.00)        | 30 (0.17) | 0.44 |
| 11-02 | Gp4 Focus 2 | g.chr4:52927016G>A   | Missense Mutation | SPATA18   | p.A88T   | spermatogenesis associated 17 (0.00)       | 24 (0.29) | 0.78 |
| 11-02 | Gp4 Focus 2 | g.chr9:43625419G>T   | Missense Mutation | SPATA31A6 | p.Q1090K | SPATA31 subfamily A, 45 (0.00)             | 17 (0.35) | 0.94 |
| 11-02 | Gp4 Focus 2 | g.chr9:90534223G>A   | RNA               | SPATA31C1 |          | SPATA31 subfamily C, 30 (0.00)             | 37 (0.14) | 0.44 |
| 11-02 | Gp4 Focus 2 | g.chr9:90501864C>T   | Missense Mutation | SPATA31E1 | p.S821F  | SPATA31 subfamily E, 29 (0.00)             | 16 (0.88) | 2.82 |
| 11-02 | Gp4 Focus 2 | g.chr17:20108116G>A  | Missense Mutation | SPECC1    | p.E171K  | sperm antigen with calpha 58 (0.00)        | 58 (0.24) | 0.64 |
| 11-02 | Gp4 Focus 2 | g.chr17:20108455G>A  | Missense Mutation | SPECC1    | p.V284I  | sperm antigen with calpha 68 (0.00)        | 22 (0.41) | 1.09 |
| 11-02 | Gp4 Focus 2 | g.chr22:24718854G>A  | Missense Mutation | SPECC1L   | p.D636N  | sperm antigen with calpha 41 (0.00)        | 41 (0.22) | 0.59 |
| 11-02 | Gp4 Focus 2 | g.chr1:16258253G>A   | Missense Mutation | SPEN      | p.V1840I | spen family transcription factor 39 (0.00) | 43 (0.47) | 1.24 |
| 11-02 | Gp4 Focus 2 | g.chr1:16264028G>A   | Missense Mutation | SPEN      | p.S3466N | spen family transcription factor 25 (0.00) | 16 (0.44) | 1.17 |
| 11-02 | Gp4 Focus 2 | g.chr15:65273277G>A  | Silent            | SPG21     | p.P50P   | spastic paraplegia 21 (at 30) (0.00)       | 47 (0.15) | 0.40 |
| 11-02 | Gp4 Focus 2 | g.chr2:228883158G>A  | Silent            | SPHKAP    | p.L804L  | SPHK1 interactor, AKA37 (0.00)             | 33 (0.18) | 0.48 |
| 11-02 | Gp4 Focus 2 | g.chr17:47681490C>T  | Intron            | SPOP      |          | speckle-type POZ protein 86 (0.00)         | 12 (0.67) | 1.78 |
| 11-02 | Gp4 Focus 2 | g.chr17:47687069G>A  | Intron            | SPOP      |          | speckle-type POZ protein 52 (0.00)         | 41 (0.15) | 0.39 |
| 11-02 | Gp4 Focus 2 | g.chr17:47693875C>T  | Intron            | SPOP      |          | speckle-type POZ protein 43 (0.00)         | 16 (0.38) | 1.00 |
| 11-02 | Gp4 Focus 2 | g.chr17:47716133C>T  | Intron            | SPOP      |          | speckle-type POZ protein 104 (0.00)        | 35 (0.26) | 0.69 |



|       |             |                     |                   |         |          |                           |            |            |      |
|-------|-------------|---------------------|-------------------|---------|----------|---------------------------|------------|------------|------|
| 11-02 | Gp4 Focus 2 | g.chr17:47716459C>G | Intron            | SPOP    |          | speckle-type POZ protei   | 129 (0.00) | 37 (0.16)  | 0.43 |
| 11-02 | Gp4 Focus 2 | g.chr1:153066192G>A | Silent            | SPRR2E  | p.C12C   | small proline-rich protei | 26 (0.00)  | 61 (0.21)  | 0.57 |
| 11-02 | Gp4 Focus 2 | g.chr9:131345033G>A | Missense Mutation | SPTAN1  | p.D571N  | spectrin, alpha, non-eryt | 57 (0.00)  | 36 (0.22)  | 0.59 |
| 11-02 | Gp4 Focus 2 | g.chr19:41008340C>T | Nonsense Mutation | SPTBN4  | p.Q377*  | spectrin, beta, non-eryth | 19 (0.00)  | 42 (0.14)  | 0.38 |
| 11-02 | Gp4 Focus 2 | g.chr15:42166539C>G | Missense Mutation | SPTBN5  | p.S1547T | spectrin, beta, non-eryth | 23 (0.00)  | 41 (0.22)  | 0.59 |
| 11-02 | Gp4 Focus 2 | g.chr15:42175674C>T | Missense Mutation | SPTBN5  | p.V511I  | spectrin, beta, non-eryth | 43 (0.00)  | 38 (0.29)  | 0.77 |
| 11-02 | Gp4 Focus 2 | g.chr15:42185104G>T | Missense Mutation | SPTBN5  | p.F124L  | spectrin, beta, non-eryth | 19 (0.00)  | 38 (0.24)  | 0.63 |
| 11-02 | Gp4 Focus 2 | g.chr9:94797146G>A  | Missense Mutation | SPTLC1  | p.A425V  | serine palmitoyltransfer  | 68 (0.00)  | 48 (0.15)  | 0.39 |
| 11-02 | Gp4 Focus 2 | g.chr8:126015658C>T | Missense Mutation | SQLE    | p.L178F  | squalene epoxidase        | 73 (0.00)  | 18 (0.50)  | 1.71 |
| 11-02 | Gp4 Focus 2 | g.chr5:179249997A>G | Missense Mutation | SQSTM1  | p.E82G   | sequestosome 1            | 23 (0.00)  | 38 (0.26)  | 0.70 |
| 11-02 | Gp4 Focus 2 | g.chr16:30731638G>A | Silent            | SRCAP   | p.K991K  | Snf2-related CREBBP a     | 37 (0.00)  | 35 (0.29)  | 0.76 |
| 11-02 | Gp4 Focus 2 | g.chr16:30735138G>A | Missense Mutation | SRCAP   | p.V1465I | Snf2-related CREBBP a     | 31 (0.00)  | 22 (0.36)  | 0.97 |
| 11-02 | Gp4 Focus 2 | g.chr17:2224720G>A  | Splice Site       | SRR     |          | serine racemase           | 57 (0.00)  | 34 (0.21)  | 0.55 |
| 11-02 | Gp4 Focus 2 | g.chr1:24972490C>T  | Nonsense Mutation | SRRM1   | p.Q13*   | serine/arginine repetitiv | 52 (0.00)  | 37 (0.24)  | 0.65 |
| 11-02 | Gp4 Focus 2 | g.chr1:24976528G>A  | Missense Mutation | SRRM1   | p.E158K  | serine/arginine repetitiv | 53 (0.02)  | 20 (0.45)  | 1.20 |
| 11-02 | Gp4 Focus 2 | g.chr1:24987244C>T  | Silent            | SRRM1   | p.S450S  | serine/arginine repetitiv | 59 (0.00)  | 42 (0.14)  | 0.38 |
| 11-02 | Gp4 Focus 2 | g.chr1:24993337C>T  | Missense Mutation | SRRM1   | p.P554S  | serine/arginine repetitiv | 26 (0.00)  | 37 (0.24)  | 0.65 |
| 11-02 | Gp4 Focus 2 | g.chr16:2817008C>T  | Missense Mutation | SRRM2   | p.P2160L | serine/arginine repetitiv | 19 (0.00)  | 19 (0.37)  | 1.18 |
| 11-02 | Gp4 Focus 2 | g.chr6:36566634G>A  | Missense Mutation | SRSF3   | p.C72Y   | serine/arginine-rich spli | 65 (0.00)  | 9 (0.67)   | 1.78 |
| 11-02 | Gp4 Focus 2 | g.chr2:170657528C>A | Missense Mutation | SSB     | p.Q20K   | Sjogren syndrome antig    | 70 (0.00)  | 16 (0.69)  | 1.83 |
| 11-02 | Gp4 Focus 2 | g.chr8:53071510C>T  | Missense Mutation | ST18    | p.C585Y  | suppression of tumorige   | 15 (0.00)  | 21 (0.29)  | 0.96 |
| 11-02 | Gp4 Focus 2 | g.chr8:53092798C>T  | Missense Mutation | ST18    | p.R54K   | suppression of tumorige   | 30 (0.00)  | 17 (0.35)  | 1.19 |
| 11-02 | Gp4 Focus 2 | g.chr11:8751599G>T  | Nonsense Mutation | ST5     | p.S413*  | suppression of tumorige   | 50 (0.00)  | 104 (0.18) | 0.49 |
| 11-02 | Gp4 Focus 2 | g.chr3:186760886G>A | Missense Mutation | ST6GAL1 | p.G132D  | ST6 beta-galactosamide    | 16 (0.00)  | 24 (0.33)  | 0.89 |
| 11-02 | Gp4 Focus 2 | g.chr15:93007420C>T | Silent            | ST8SIA2 | p.Y311Y  | ST8 alpha-N-acetyl-neu    | 35 (0.00)  | 27 (0.74)  | 2.44 |
| 11-02 | Gp4 Focus 2 | g.chr7:99795421G>A  | Silent            | STAG3   | p.K362K  | stromal antigen 3         | 37 (0.00)  | 24 (0.25)  | 0.67 |
| 11-02 | Gp4 Focus 2 | g.chr7:99802925C>T  | Silent            | STAG3   | p.Y1052Y | stromal antigen 3         | 23 (0.00)  | 25 (0.20)  | 0.53 |
| 11-02 | Gp4 Focus 2 | g.chr13:33685012G>A | Silent            | STARD13 | p.N880N  | StAR-related lipid trans  | 20 (0.00)  | 31 (0.29)  | 0.77 |
| 11-02 | Gp4 Focus 2 | g.chr15:42980385G>A | Missense Mutation | STARD9  | p.M2203I | StAR-related lipid trans  | 60 (0.00)  | 42 (0.14)  | 0.38 |
| 11-02 | Gp4 Focus 2 | g.chr15:42981285G>A | Silent            | STARD9  | p.K2503K | StAR-related lipid trans  | 30 (0.00)  | 16 (0.38)  | 1.00 |
| 11-02 | Gp4 Focus 2 | g.chr2:191839659C>T | Splice Site       | STAT1   |          | signal transducer and ac  | 34 (0.00)  | 28 (0.21)  | 0.57 |
| 11-02 | Gp4 Focus 2 | g.chr5:171583759C>T | Missense Mutation | STK10   | p.A64T   | serine/threonine kinase   | 43 (0.00)  | 25 (0.20)  | 0.53 |
| 11-02 | Gp4 Focus 2 | g.chr2:168931725C>G | Missense Mutation | STK39   | p.G369A  | serine threonine kinase   | 56 (0.00)  | 13 (0.69)  | 1.85 |
| 11-02 | Gp4 Focus 2 | g.chr17:61784684G>A | Missense Mutation | STRADA  | p.R197W  | STE20-related kinase ac   | 25 (0.00)  | 13 (0.38)  | 1.03 |
| 11-02 | Gp4 Focus 2 | g.chr2:202342431G>A | Missense Mutation | STRADB  | p.G213E  | STE20-related kinase ac   | 36 (0.00)  | 10 (0.50)  | 1.33 |

|       |             |                     |                   |         |          |                                      |           |           |      |
|-------|-------------|---------------------|-------------------|---------|----------|--------------------------------------|-----------|-----------|------|
| 11-02 | Gp4 Focus 2 | g.chr7:129094011C>T | Missense Mutation | STRIP2  | p.R187W  | striatin interacting prote 26 (0.00) | 22 (0.32) | 0.85      |      |
| 11-02 | Gp4 Focus 2 | g.chr7:129096355G>A | Missense Mutation | STRIP2  | p.A304T  | striatin interacting prote 16 (0.00) | 13 (0.54) | 1.44      |      |
| 11-02 | Gp4 Focus 2 | g.chr7:129096357T>A | Silent            | STRIP2  | p.A304A  | striatin interacting prote 16 (0.00) | 13 (0.54) | 1.44      |      |
| 11-02 | Gp4 Focus 2 | g.chr7:129096358G>A | Missense Mutation | STRIP2  | p.E305K  | striatin interacting prote 16 (0.00) | 13 (0.54) | 1.44      |      |
| 11-02 | Gp4 Focus 2 | g.chr16:732188G>A   | Silent            | STUB1   | p.L231L  | STIP1 homology and U-36 (0.00)       | 45 (0.44) | 1.42      |      |
| 11-02 | Gp4 Focus 2 | g.chr1:28128296T>A  | Silent            | STX12   | p.I132I  | syntaxin 12                          | 23 (0.00) | 11 (0.73) | 1.94 |
| 11-02 | Gp4 Focus 2 | g.chr11:59558002G>A | Silent            | STX3    | p.K100K  | syntaxin 3                           | 32 (0.00) | 42 (0.14) | 0.38 |
| 11-02 | Gp4 Focus 2 | g.chr11:62594850C>T | Missense Mutation | STX5    | p.S106N  | syntaxin 5                           | 88 (0.00) | 23 (0.39) | 1.04 |
| 11-02 | Gp4 Focus 2 | g.chr17:53237206G>A | Silent            | STXBP4  | p.L510L  | syntaxin binding protein93 (0.00)    | 37 (0.32) | 0.86      |      |
| 11-02 | Gp4 Focus 2 | g.chr7:56141878G>A  | Nonsense Mutation | SUMF2   | p.W117*  | sulfatase modifying fact44 (0.00)    | 42 (0.29) | 0.76      |      |
| 11-02 | Gp4 Focus 2 | g.chr7:48033968C>T  | Missense Mutation | SUN3    | p.E269K  | Sad1 and UNC84 domai45 (0.00)        | 13 (0.46) | 1.23      |      |
| 11-02 | Gp4 Focus 2 | g.chr14:21820851G>A | Missense Mutation | SUPT16H | p.P1042L | suppressor of Ty 16 hon91 (0.00)     | 50 (0.38) | 0.56      |      |
| 11-02 | Gp4 Focus 2 | g.chr13:37591426G>C | Missense Mutation | SUPT20H | p.P650A  | suppressor of Ty 20 hon115 (0.00)    | 30 (0.17) | 0.44      |      |
| 11-02 | Gp4 Focus 2 | g.chr17:27017150C>T | Silent            | SUPT6H  | p.S1131S | suppressor of Ty 6 hom48 (0.00)      | 33 (0.27) | 0.73      |      |
| 11-02 | Gp4 Focus 2 | g.chr3:33194548C>G  | Missense Mutation | SUSD5   | p.V526L  | sushi domain containing65 (0.00)     | 31 (0.19) | 0.52      |      |
| 11-02 | Gp4 Focus 2 | g.chr9:113170378G>A | Missense Mutation | SVEP1   | p.P2478L | sushi, von Willebrand f22 (0.00)     | 28 (0.21) | 0.57      |      |
| 11-02 | Gp4 Focus 2 | g.chr9:113194761G>A | Silent            | SVEP1   | p.G1715G | sushi, von Willebrand f269 (0.01)    | 31 (0.23) | 0.60      |      |
| 11-02 | Gp4 Focus 2 | g.chr9:113233669G>A | Silent            | SVEP1   | p.G968G  | sushi, von Willebrand f256 (0.00)    | 26 (0.19) | 0.51      |      |
| 11-02 | Gp4 Focus 2 | g.chr11:22848775G>A | Missense Mutation | SVIP    | p.P66L   | small VCP/p97-interacti19 (0.00)     | 29 (0.21) | 0.55      |      |
| 11-02 | Gp4 Focus 2 | g.chr1:185130049G>A | Missense Mutation | SWT1    | p.G26S   | SWT1 RNA endoribonu39 (0.00)         | 15 (0.33) | 0.89      |      |
| 11-02 | Gp4 Focus 2 | g.chr8:110587168C>T | Silent            | SYBU    | p.S652S  | syntabulin (syntaxin-int42 (0.00)    | 41 (0.22) | 0.75      |      |
| 11-02 | Gp4 Focus 2 | g.chr8:110587201C>T | Silent            | SYBU    | p.L641L  | syntabulin (syntaxin-int38 (0.00)    | 45 (0.22) | 0.76      |      |
| 11-02 | Gp4 Focus 2 | g.chr8:110592175G>A | Missense Mutation | SYBU    | p.P195L  | syntabulin (syntaxin-int48 (0.00)    | 48 (0.40) | 1.35      |      |
| 11-02 | Gp4 Focus 2 | g.chr9:93641140G>T  | Missense Mutation | SYK     | p.A496S  | spleen tyrosine kinase 64 (0.00)     | 35 (0.26) | 0.69      |      |
| 11-02 | Gp4 Focus 2 | g.chr1:33160483C>T  | Missense Mutation | SYNC    | p.E406K  | syncoilin, intermediate 149 (0.00)   | 55 (0.49) | 1.31      |      |
| 11-02 | Gp4 Focus 2 | g.chr6:152522958C>T | Splice Site       | SYNE1   |          | spectrin repeat containir22 (0.00)   | 32 (0.28) | 0.75      |      |
| 11-02 | Gp4 Focus 2 | g.chr6:152719773G>A | Missense Mutation | SYNE1   | p.A2444V | spectrin repeat containir63 (0.02)   | 14 (0.50) | 1.33      |      |
| 11-02 | Gp4 Focus 2 | g.chr6:152720852C>T | Missense Mutation | SYNE1   | p.G2379D | spectrin repeat containir96 (0.00)   | 31 (0.84) | 2.24      |      |
| 11-02 | Gp4 Focus 2 | g.chr14:64491721C>T | Silent            | SYNE2   | p.L1978L | spectrin repeat containir28 (0.00)   | 37 (0.16) | 0.43      |      |
| 11-02 | Gp4 Focus 2 | g.chr14:64518648C>T | Nonsense Mutation | SYNE2   | p.Q2706* | spectrin repeat containir59 (0.00)   | 34 (0.18) | 0.47      |      |
| 11-02 | Gp4 Focus 2 | g.chr14:95912365G>A | Missense Mutation | SYNE3   | p.L505F  | spectrin repeat containir32 (0.00)   | 60 (0.20) | 0.53      |      |
| 11-02 | Gp4 Focus 2 | g.chr21:34018813G>A | Missense Mutation | SYNJ1   | p.P1085L | synaptojanin 1                       | 29 (0.00) | 21 (0.24) | 0.63 |
| 11-02 | Gp4 Focus 2 | g.chr6:158513996G>A | Missense Mutation | SYNJ2   | p.D1202N | synaptojanin 2                       | 20 (0.00) | 45 (0.40) | 1.07 |
| 11-02 | Gp4 Focus 2 | g.chr4:119951193G>A | Silent            | SYNPO2  | p.A421A  | synaptopodin 2                       | 43 (0.00) | 30 (0.60) | 1.60 |
| 11-02 | Gp4 Focus 2 | g.chr14:62547665G>A | Silent            | SYT16   | p.V369V  | synaptotagmin XVI                    | 15 (0.00) | 27 (0.70) | 1.88 |

|       |             |                      |                   |          |          |                           |            |           |      |
|-------|-------------|----------------------|-------------------|----------|----------|---------------------------|------------|-----------|------|
| 11-02 | Gp4 Focus 2 | g.chr14:62567230G>C  | Silent            | SYT16    | p.V581V  | synaptotagmin XVI         | 45 (0.00)  | 48 (0.17) | 0.44 |
| 11-02 | Gp4 Focus 2 | g.chr19:55687131G>A  | Silent            | SYT5     | p.T162T  | synaptotagmin V           | 20 (0.00)  | 32 (0.28) | 0.75 |
| 11-02 | Gp4 Focus 2 | g.chr19:55687144C>T  | Missense Mutation | SYT5     | p.R158K  | synaptotagmin V           | 21 (0.00)  | 37 (0.19) | 0.50 |
| 11-02 | Gp4 Focus 2 | g.chr1:43902995G>A   | Splice Site       | SZT2     |          | seizure threshold 2 hom   | 25 (0.00)  | 15 (0.67) | 1.78 |
| 11-02 | Gp4 Focus 2 | g.chr8:38678075G>A   | Missense Mutation | TACC1    | p.S438N  | transforming, acidic coil | 52 (0.00)  | 51 (0.14) | 0.44 |
| 11-02 | Gp4 Focus 2 | g.chr8:38704220C>T   | Silent            | TACC1    | p.A744A  | transforming, acidic coil | 45 (0.00)  | 14 (0.57) | 1.85 |
| 11-02 | Gp4 Focus 2 | g.chr10:123988921G>A | Missense Mutation | TACC2    | p.V731I  | transforming, acidic coil | 106 (0.00) | 16 (0.94) | 2.50 |
| 11-02 | Gp4 Focus 2 | g.chr4:104510942C>T  | Missense Mutation | TACR3    | p.R432K  | tachykinin receptor 3     | 63 (0.00)  | 19 (0.42) | 1.12 |
| 11-02 | Gp4 Focus 2 | g.chr1:166833146G>A  | Missense Mutation | TADA1    | p.S82F   | transcriptional adaptor   | 130 (0.00) | 21 (0.48) | 1.27 |
| 11-02 | Gp4 Focus 2 | g.chr4:7056067G>A    | Silent            | TADA2B   | p.T183T  | transcriptional adaptor   | 238 (0.00) | 45 (0.42) | 1.13 |
| 11-02 | Gp4 Focus 2 | g.chr4:7056130C>A    | Silent            | TADA2B   | p.A204A  | transcriptional adaptor   | 248 (0.00) | 34 (0.47) | 1.25 |
| 11-02 | Gp4 Focus 2 | g.chr4:7056185G>A    | Missense Mutation | TADA2B   | p.A223T  | transcriptional adaptor   | 270 (0.01) | 38 (0.16) | 0.42 |
| 11-02 | Gp4 Focus 2 | g.chr16:84215651G>A  | Silent            | TAF1C    | p.V245V  | TATA box binding prot     | 26 (0.00)  | 35 (0.71) | 1.90 |
| 11-02 | Gp4 Focus 2 | g.chr9:32630658A>G   | Silent            | TAF1L    | p.A1640A | TAF1 RNA polymerase       | 38 (0.00)  | 34 (0.26) | 0.71 |
| 11-02 | Gp4 Focus 2 | g.chr1:229738475G>A  | Nonsense Mutation | TAF5L    | p.Q147*  | TAF5-like RNA polymε      | 48 (0.00)  | 17 (0.29) | 0.78 |
| 11-02 | Gp4 Focus 2 | g.chr7:99710482G>A   | Silent            | TAF6     | p.G208G  | TAF6 RNA polymerase       | 32 (0.00)  | 35 (0.23) | 0.61 |
| 11-02 | Gp4 Focus 2 | g.chr2:160031540C>T  | Missense Mutation | TANC1    | p.A527V  | tetratricopeptide repeat, | 69 (0.00)  | 42 (0.33) | 0.89 |
| 11-02 | Gp4 Focus 2 | g.chr2:160087281G>A  | Missense Mutation | TANC1    | p.A1782T | tetratricopeptide repeat, | 52 (0.00)  | 31 (0.19) | 0.52 |
| 11-02 | Gp4 Focus 2 | g.chr17:61492907G>A  | Missense Mutation | TANC2    | p.A1263T | tetratricopeptide repeat, | 77 (0.00)  | 41 (0.15) | 0.39 |
| 11-02 | Gp4 Focus 2 | g.chr16:68934358C>T  | Missense Mutation | TANGO6   | p.P467S  | transport and golgi orga  | 24 (0.00)  | 26 (0.31) | 0.82 |
| 11-02 | Gp4 Focus 2 | g.chr2:162036200C>T  | Silent            | TANK     | p.L9L    | TRAF family member-a      | 55 (0.00)  | 20 (0.25) | 0.67 |
| 11-02 | Gp4 Focus 2 | g.chr16:29994970C>A  | Silent            | TAOK2    | p.I469I  | TAO kinase 2              | 33 (0.00)  | 46 (0.22) | 0.58 |
| 11-02 | Gp4 Focus 2 | g.chr16:30002165G>A  | Missense Mutation | TAOK2    | p.E836K  | TAO kinase 2              | 15 (0.00)  | 17 (0.35) | 0.94 |
| 11-02 | Gp4 Focus 2 | g.chr12:118675954C>T | Missense Mutation | TAOK3    | p.E121K  | TAO kinase 3              | 35 (0.00)  | 26 (0.50) | 1.33 |
| 11-02 | Gp4 Focus 2 | g.chr1:150459987C>T  | Missense Mutation | TARS2    | p.H21Y   | threonyl-tRNA syntheta    | 38 (0.00)  | 18 (0.44) | 1.19 |
| 11-02 | Gp4 Focus 2 | g.chr1:150463978G>A  | Silent            | TARS2    | p.Q207Q  | threonyl-tRNA syntheta    | 43 (0.00)  | 51 (0.33) | 0.89 |
| 11-02 | Gp4 Focus 2 | g.chr1:6631014G>A    | Missense Mutation | TAS1R1   | p.M79I   | taste receptor, type 1, m | 26 (0.00)  | 29 (0.21) | 0.55 |
| 11-02 | Gp4 Focus 2 | g.chr1:6631017G>A    | Silent            | TAS1R1   | p.R80R   | taste receptor, type 1, m | 26 (0.00)  | 30 (0.23) | 0.62 |
| 11-02 | Gp4 Focus 2 | g.chr1:6631072G>A    | Missense Mutation | TAS1R1   | p.G99R   | taste receptor, type 1, m | 24 (0.00)  | 28 (0.32) | 0.86 |
| 11-02 | Gp4 Focus 2 | g.chr1:6639231C>T    | Missense Mutation | TAS1R1   | p.P705S  | taste receptor, type 1, m | 16 (0.00)  | 16 (0.44) | 1.17 |
| 11-02 | Gp4 Focus 2 | g.chr7:141478894C>T  | Silent            | TAS2R4   | p.S202S  | taste receptor, type 2, m | 72 (0.00)  | 28 (0.21) | 0.57 |
| 11-02 | Gp4 Focus 2 | g.chr1:212988363T>C  | Silent            | TATDN3   | p.N209N  | TatD DNase domain coi     | 49 (0.00)  | 24 (0.46) | 1.22 |
| 11-02 | Gp4 Focus 2 | g.chr22:30688373G>T  | Silent            | TBC1D10A | p.T513T  | TBC1 domain family, n     | 24 (0.00)  | 35 (0.20) | 0.53 |
| 11-02 | Gp4 Focus 2 | g.chr22:30691770C>T  | Silent            | TBC1D10A | p.R167R  | TBC1 domain family, n     | 19 (0.00)  | 20 (0.40) | 1.07 |
| 11-02 | Gp4 Focus 2 | g.chr4:6925596C>A    | Silent            | TBC1D14  | p.S160S  | TBC1 domain family, n     | 23 (0.00)  | 34 (0.21) | 0.55 |

|       |             |                      |                   |          |          |                          |             |            |      |
|-------|-------------|----------------------|-------------------|----------|----------|--------------------------|-------------|------------|------|
| 11-02 | Gp4 Focus 2 | g.chr15:78346454C>T  | Missense Mutation | TBC1D2B  | p.D146N  | TBC1 domain family, n    | 143 (0.01)  | 101 (0.22) | 0.58 |
| 11-02 | Gp4 Focus 2 | g.chr12:65269520G>A  | Silent            | TBC1D30  | p.R746R  | TBC1 domain family, n    | 45 (0.00)   | 28 (0.32)  | 0.86 |
| 11-02 | Gp4 Focus 2 | g.chr17:60344566G>A  | RNA               | TBC1D3P2 |          | TBC1 domain family, n    | 26 (0.00)   | 19 (0.68)  | 1.82 |
| 11-02 | Gp4 Focus 2 | g.chr17:60348238C>T  | RNA               | TBC1D3P2 |          | TBC1 domain family, n    | 29 (0.00)   | 24 (0.25)  | 0.67 |
| 11-02 | Gp4 Focus 2 | g.chr13:75876522C>A  | Missense Mutation | TBC1D4   | p.R923L  | TBC1 domain family, n    | 25 (0.00)   | 15 (0.33)  | 0.89 |
| 11-02 | Gp4 Focus 2 | g.chrX:106093273C>T  | Missense Mutation | TBC1D8B  | p.A619V  | TBC1 domain family, n    | 16 (0.00)   | 18 (0.44)  | 0.99 |
| 11-02 | Gp4 Focus 2 | g.chr4:141549485G>A  | Silent            | TBC1D9   | p.L927L  | TBC1 domain family, n    | 57 (0.00)   | 16 (0.38)  | 1.71 |
| 11-02 | Gp4 Focus 2 | g.chr3:186272863G>A  | Silent            | TBCCD1   | p.T194T  | TBCC domain containir    | 28 (0.00)   | 22 (0.27)  | 0.73 |
| 11-02 | Gp4 Focus 2 | g.chr1:235582858G>A  | Missense Mutation | TBCE     | p.V148I  | tubulin folding cofactor | 43 (0.02)   | 15 (0.40)  | 1.07 |
| 11-02 | Gp4 Focus 2 | g.chr14:55895536C>T  | Silent            | TBPL2    | p.Q315Q  | TATA box binding prot    | 70 (0.00)   | 32 (0.38)  | 1.00 |
| 11-02 | Gp4 Focus 2 | g.chr14:55903548C>T  | Silent            | TBPL2    | p.Q113Q  | TATA box binding prot    | 33 (0.00)   | 15 (0.33)  | 0.89 |
| 11-02 | Gp4 Focus 2 | g.chr16:30099918C>T  | Missense Mutation | TBX6     | p.A263T  | T-box 6                  | 20 (0.00)   | 17 (0.53)  | 1.41 |
| 11-02 | Gp4 Focus 2 | g.chr16:30100033G>C  | Missense Mutation | TBX6     | p.T250R  | T-box 6                  | 22 (0.00)   | 11 (0.45)  | 1.21 |
| 11-02 | Gp4 Focus 2 | g.chr7:139661915C>T  | Silent            | TBXAS1   | p.L339L  | thromboxane A synthas    | 19 (0.00)   | 19 (0.32)  | 0.84 |
| 11-02 | Gp4 Focus 2 | g.chrX:102586530G>A  | Missense Mutation | TCEAL7   | p.D67N   | transcription elongation | 20 (0.00)   | 12 (0.75)  | 1.67 |
| 11-02 | Gp4 Focus 2 | g.chr5:145834688A>G  | Silent            | TCERG1   | p.P43P   | transcription elongation | 21 (0.00)   | 33 (0.18)  | 0.48 |
| 11-02 | Gp4 Focus 2 | g.chr2:27375699C>T   | Silent            | TCF23    | p.S203S  | transcription factor 23  | 41 (0.00)   | 33 (0.24)  | 0.65 |
| 11-02 | Gp4 Focus 2 | g.chr18:53131314G>A  | Missense Mutation | TCF4     | p.P67L   | transcription factor 4   | 72 (0.00)   | 125 (0.22) | 0.60 |
| 11-02 | Gp4 Focus 2 | g.chr1:152081849C>T  | Missense Mutation | TCHH     | p.E1282K | trichohyalin             | 30 (0.00)   | 29 (0.34)  | 0.92 |
| 11-02 | Gp4 Focus 2 | g.chr14:96178615G>T  | Missense Mutation | TCL1A    | p.P80H   | T-cell leukemia/lympho   | 21 (0.00)   | 17 (0.35)  | 0.94 |
| 11-02 | Gp4 Focus 2 | g.chr11:59633872C>T  | Silent            | TCN1     | p.E24E   | transcobalamin I (vitami | 35 (0.00)   | 58 (0.19)  | 0.51 |
| 11-02 | Gp4 Focus 2 | g.chr5:149758821C>T  | Silent            | TCOF1    | p.N836N  | Treacher Collins-France  | 17 (0.00)   | 45 (0.22)  | 0.59 |
| 11-02 | Gp4 Focus 2 | g.chr6:160200980C>T  | Missense Mutation | TCP1     | p.G413S  | t-complex 1              | 43 (0.00)   | 26 (0.27)  | 0.72 |
| 11-02 | Gp4 Focus 2 | g.chr13:61084872G>A  | Missense Mutation | TDRD3    | p.G282E  | tudor domain containing  | 87 (0.00)   | 40 (0.12)  | 0.65 |
| 11-02 | Gp4 Focus 2 | g.chr6:46660258G>A   | Missense Mutation | TDRD6    | p.E1465K | tudor domain containing  | 28 (0.00)   | 16 (0.62)  | 1.67 |
| 11-02 | Gp4 Focus 2 | g.chr14:102900876C>T | Silent            | TECPR2   | p.H574H  | tectonin beta-propeller  | r 15 (0.00) | 10 (0.70)  | 1.87 |
| 11-02 | Gp4 Focus 2 | g.chr4:65175566G>A   | Missense Mutation | TECRL    | p.T212I  | trans-2,3-enoyl-CoA rec  | 39 (0.00)   | 13 (0.62)  | 3.52 |
| 11-02 | Gp4 Focus 2 | g.chr16:10729657G>A  | Missense Mutation | TEKT5    | p.P402L  | tektin 5                 | 16 (0.00)   | 31 (0.23)  | 0.72 |
| 11-02 | Gp4 Focus 2 | g.chr5:167631400G>A  | Missense Mutation | TENM2    | p.E968K  | teneurin transmembrane   | 25 (0.00)   | 40 (0.35)  | 0.93 |
| 11-02 | Gp4 Focus 2 | g.chr5:167642275G>A  | Missense Mutation | TENM2    | p.R1120K | teneurin transmembrane   | 60 (0.00)   | 18 (0.44)  | 1.19 |
| 11-02 | Gp4 Focus 2 | g.chr5:167645248G>A  | Missense Mutation | TENM2    | p.G1212E | teneurin transmembrane   | 39 (0.03)   | 36 (0.31)  | 0.81 |
| 11-02 | Gp4 Focus 2 | g.chr5:167645947G>T  | Missense Mutation | TENM2    | p.G1445V | teneurin transmembrane   | 114 (0.00)  | 60 (0.28)  | 0.76 |
| 11-02 | Gp4 Focus 2 | g.chr5:167655003G>A  | Silent            | TENM2    | p.A1557A | teneurin transmembrane   | 134 (0.00)  | 27 (0.19)  | 0.49 |
| 11-02 | Gp4 Focus 2 | g.chr4:183522146C>T  | Missense Mutation | TENM3    | p.A194V  | teneurin transmembrane   | 77 (0.00)   | 21 (0.48)  | 1.27 |
| 11-02 | Gp4 Focus 2 | g.chr4:183714938C>A  | Silent            | TENM3    | p.I237II | teneurin transmembrane   | 115 (0.00)  | 19 (0.58)  | 1.54 |

|       |             |                      |                   |         |          |                             |            |           |      |
|-------|-------------|----------------------|-------------------|---------|----------|-----------------------------|------------|-----------|------|
| 11-02 | Gp4 Focus 2 | g.chr11:78380008G>T  | Missense Mutation | TENM4   | p.S2461Y | teneurin transmembrane 51   | 0.00       | 27 (0.22) | 0.59 |
| 11-02 | Gp4 Focus 2 | g.chr14:20845778C>T  | Silent            | TEP1    | p.R1844R | telomerase-associated p127  | 0.00       | 16 (0.38) | 0.55 |
| 11-02 | Gp4 Focus 2 | g.chr14:20869175C>T  | Missense Mutation | TEP1    | p.G398E  | telomerase-associated p195  | 0.00       | 39 (0.31) | 0.45 |
| 11-02 | Gp4 Focus 2 | g.chr8:73958227G>A   | Missense Mutation | TERF1   | p.R392K  | telomeric repeat binding 16 | 0.00       | 13 (0.62) | 2.08 |
| 11-02 | Gp4 Focus 2 | g.chr8:73958263C>A   | Missense Mutation | TERF1   | p.S404Y  | telomeric repeat binding 15 | 0.00       | 15 (0.53) | 1.80 |
| 11-02 | Gp4 Focus 2 | g.chr12:117513086G>A | Missense Mutation | TESC    | p.P40S   | tescalcin                   | 42 (0.00)  | 39 (0.44) | 1.16 |
| 11-02 | Gp4 Focus 2 | g.chr10:70332861G>A  | Missense Mutation | TET1    | p.A256T  | tet methylcytosine dioxy 16 | 0.00       | 19 (0.26) | 0.70 |
| 11-02 | Gp4 Focus 2 | g.chr10:70332878C>T  | Silent            | TET1    | p.T261T  | tet methylcytosine dioxy 18 | 0.00       | 14 (0.36) | 0.95 |
| 11-02 | Gp4 Focus 2 | g.chr3:51718582T>A   | Missense Mutation | TEX264  | p.Y138N  | testis expressed 264        | 22 (0.00)  | 13 (0.38) | 1.03 |
| 11-02 | Gp4 Focus 2 | g.chr5:135390416C>T  | Missense Mutation | TGFBI   | p.P426S  | transforming growth fac 158 | 0.00       | 25 (0.24) | 0.64 |
| 11-02 | Gp4 Focus 2 | g.chr3:30713661C>T   | Missense Mutation | TGFBR2  | p.A329V  | transforming growth fac 77  | 0.00       | 12 (0.50) | 1.33 |
| 11-02 | Gp4 Focus 2 | g.chr3:30733031G>A   | Silent            | TGFBR2  | p.S548S  | transforming growth fac 23  | 0.00       | 70 (0.34) | 0.91 |
| 11-02 | Gp4 Focus 2 | g.chr1:92200488G>A   | Missense Mutation | TGFBR3  | p.S138L  | transforming growth fac 101 | 0.00       | 23 (0.65) | 1.74 |
| 11-02 | Gp4 Focus 2 | g.chr15:43568667C>T  | Missense Mutation | TGM7    | p.A707T  | transglutaminase 7          | 35 (0.00)  | 48 (0.23) | 0.61 |
| 11-02 | Gp4 Focus 2 | g.chr2:242573374G>A  | Silent            | THAP4   | p.S66S   | THAP domain containir       | 28 (0.00)  | 53 (0.34) | 0.91 |
| 11-02 | Gp4 Focus 2 | g.chr15:39877720C>T  | Missense Mutation | THBS1   | p.S359F  | thrombospondin 1            | 29 (0.03)  | 49 (0.22) | 0.60 |
| 11-02 | Gp4 Focus 2 | g.chr5:79368152G>A   | Missense Mutation | THBS4   | p.R500Q  | thrombospondin 4            | 40 (0.00)  | 54 (0.39) | 1.04 |
| 11-02 | Gp4 Focus 2 | g.chr6:128134035G>A  | Missense Mutation | THEMIS  | p.S505F  | thymocyte selection asso    | 50 (0.00)  | 26 (0.54) | 1.44 |
| 11-02 | Gp4 Focus 2 | g.chr22:29907184C>T  | Silent            | THOC5   | p.L633L  | THO complex 5               | 67 (0.01)  | 24 (0.21) | 0.56 |
| 11-02 | Gp4 Focus 2 | g.chr16:3077045G>T   | Nonsense Mutation | THOC6   | p.G224*  | THO complex 6 homolog       | 18 (0.00)  | 32 (0.28) | 0.90 |
| 11-02 | Gp4 Focus 2 | g.chr1:36752262G>A   | Missense Mutation | THRAP3  | p.R144K  | thyroid hormone receptc     | 38 (0.00)  | 28 (0.18) | 0.48 |
| 11-02 | Gp4 Focus 2 | g.chr3:24169142T>C   | Missense Mutation | THRB    | p.N346S  | thyroid hormone receptc     | 54 (0.00)  | 27 (0.30) | 0.79 |
| 11-02 | Gp4 Focus 2 | g.chr3:24184992C>T   | Splice Site       | THRB    | p.L261L  | thyroid hormone receptc     | 65 (0.00)  | 45 (0.16) | 0.41 |
| 11-02 | Gp4 Focus 2 | g.chr7:11632921G>A   | Missense Mutation | THSD7A  | p.P411S  | thrombospondin, type I,     | 105 (0.00) | 41 (0.41) | 1.48 |
| 11-02 | Gp4 Focus 2 | g.chr2:138000089G>A  | Missense Mutation | THSD7B  | p.C738Y  | thrombospondin, type I,     | 21 (0.00)  | 10 (0.70) | 2.28 |
| 11-02 | Gp4 Focus 2 | g.chr2:138434111A>T  | Missense Mutation | THSD7B  | p.H1586L | thrombospondin, type I,     | 57 (0.00)  | 40 (0.15) | 0.49 |
| 11-02 | Gp4 Focus 2 | g.chr16:20748485C>T  | Missense Mutation | THUMPD1 | p.R260K  | THUMP domain containi       | 115 (0.00) | 28 (0.21) | 0.57 |
| 11-02 | Gp4 Focus 2 | g.chr3:9426277G>A    | Missense Mutation | THUMPD3 | p.A477T  | THUMP domain containi       | 100 (0.00) | 31 (0.23) | 0.60 |
| 11-02 | Gp4 Focus 2 | g.chr21:32638963G>A  | Missense Mutation | TIAM1   | p.T109I  | T-cell lymphoma invasi      | 20 (0.00)  | 16 (0.31) | 0.83 |
| 11-02 | Gp4 Focus 2 | g.chr15:90167181C>T  | Missense Mutation | TICRR   | p.H1214Y | TOPBP1-interacting che      | 97 (0.00)  | 28 (0.54) | 1.43 |
| 11-02 | Gp4 Focus 2 | g.chr11:65124017G>A  | Nonsense Mutation | TIGD3   | p.W246*  | tigger transposable elem    | 33 (0.00)  | 43 (0.26) | 0.68 |
| 11-02 | Gp4 Focus 2 | g.chr17:902125G>A    | Silent            | TIMM22  | p.L115L  | translocase of inner mitc   | 26 (0.00)  | 22 (0.32) | 0.85 |
| 11-02 | Gp4 Focus 2 | g.chr17:902792G>A    | Missense Mutation | TIMM22  | p.G159D  | translocase of inner mitc   | 49 (0.00)  | 63 (0.17) | 0.47 |
| 11-02 | Gp4 Focus 2 | g.chr22:33254092G>A  | Silent            | TIMP3   | p.L135L  | TIMP metalloproteinase      | 33 (0.00)  | 54 (0.20) | 0.54 |
| 11-02 | Gp4 Focus 2 | g.chr3:12195190G>A   | Missense Mutation | TIMP4   | p.P167L  | TIMP metalloproteinase      | 27 (0.00)  | 19 (0.26) | 0.70 |

|       |             |                      |                   |           |         |                            |            |           |      |
|-------|-------------|----------------------|-------------------|-----------|---------|----------------------------|------------|-----------|------|
| 11-02 | Gp4 Focus 2 | g.chr6:54212223C>T   | Silent            | TINAG     | p.S269S | tubulointerstitial nephrit | 48 (0.00)  | 18 (0.28) | 0.74 |
| 11-02 | Gp4 Focus 2 | g.chr6:54254639G>A   | Silent            | TINAG     | p.R449R | tubulointerstitial nephrit | 27 (0.00)  | 24 (0.29) | 0.78 |
| 11-02 | Gp4 Focus 2 | g.chr17:60637436G>A  | Silent            | TLK2      | p.K260K | tousled-like kinase 2      | 30 (0.00)  | 31 (0.19) | 0.52 |
| 11-02 | Gp4 Focus 2 | g.chr9:35717709G>T   | Silent            | TLN1      | p.A690A | talin 1                    | 17 (0.00)  | 28 (0.36) | 0.95 |
| 11-02 | Gp4 Focus 2 | g.chr4:187004890C>A  | Missense Mutation | TLR3      | p.H407N | toll-like receptor 3       | 126 (0.00) | 23 (0.30) | 0.81 |
| 11-02 | Gp4 Focus 2 | g.chrX:12906459C>T   | Silent            | TLR7      | p.S944S | toll-like receptor 7       | 46 (0.00)  | 22 (0.32) | 0.53 |
| 11-02 | Gp4 Focus 2 | g.chr12:27127089C>A  | Nonsense Mutation | TM7SF3    | p.G508* | transmembrane 7 superf     | 69 (0.00)  | 24 (0.25) | 0.67 |
| 11-02 | Gp4 Focus 2 | g.chr12:27149747G>A  | Missense Mutation | TM7SF3    | p.P149L | transmembrane 7 superf     | 27 (0.00)  | 18 (0.39) | 1.04 |
| 11-02 | Gp4 Focus 2 | g.chr4:164436609C>T  | Silent            | TMA16     | p.G128G | translation machinery as   | 41 (0.00)  | 67 (0.31) | 1.07 |
| 11-02 | Gp4 Focus 2 | g.chr16:19485519G>A  | Missense Mutation | TMC5      | p.V619M | transmembrane channel      | 39 (0.00)  | 49 (0.14) | 0.38 |
| 11-02 | Gp4 Focus 2 | g.chr16:19058453C>T  | Missense Mutation | TMC7      | p.P541L | transmembrane channel      | 72 (0.01)  | 73 (0.16) | 0.44 |
| 11-02 | Gp4 Focus 2 | g.chr16:19063042G>A  | Missense Mutation | TMC7      | p.R592K | transmembrane channel      | 66 (0.00)  | 22 (0.27) | 0.73 |
| 11-02 | Gp4 Focus 2 | g.chr3:129373845G>A  | Missense Mutation | TMCC1     | p.A214V | transmembrane and coil     | 110 (0.00) | 53 (0.19) | 0.50 |
| 11-02 | Gp4 Focus 2 | g.chr5:177022389G>A  | Missense Mutation | TMED9     | p.S227N | transmembrane emp24 i      | 26 (0.00)  | 36 (0.25) | 0.67 |
| 11-02 | Gp4 Focus 2 | g.chr12:129822286G>A | Silent            | TMEM132D  | p.L398L | transmembrane protein      | 34 (0.00)  | 43 (0.28) | 0.74 |
| 11-02 | Gp4 Focus 2 | g.chr7:129825032C>T  | Splice Site       | TMEM209   | p.E317E | transmembrane protein      | 23 (0.00)  | 46 (0.59) | 1.57 |
| 11-02 | Gp4 Focus 2 | g.chr2:27262629C>T   | Missense Mutation | TMEM214   | p.L516F | transmembrane protein      | 41 (0.00)  | 27 (0.19) | 0.49 |
| 11-02 | Gp4 Focus 2 | g.chr2:27262667G>A   | Silent            | TMEM214   | p.A528A | transmembrane protein      | 39 (0.00)  | 24 (0.21) | 0.56 |
| 11-02 | Gp4 Focus 2 | g.chr11:123753889G>A | Silent            | TMEM225   | p.L212L | transmembrane protein      | 28 (0.00)  | 17 (0.35) | 0.94 |
| 11-02 | Gp4 Focus 2 | g.chr11:61558006C>T  | Silent            | TMEM258   | p.V19V  | transmembrane protein      | 26 (0.00)  | 38 (0.18) | 0.49 |
| 11-02 | Gp4 Focus 2 | g.chr19:16791238C>T  | Silent            | TMEM38A   | p.L104L | transmembrane protein      | 31 (0.00)  | 22 (0.23) | 0.61 |
| 11-02 | Gp4 Focus 2 | g.chr3:44905741C>T   | Missense Mutation | TMEM42    | p.S82F  | transmembrane protein      | 61 (0.02)  | 32 (0.28) | 0.75 |
| 11-02 | Gp4 Focus 2 | g.chr6:44106232C>T   | Silent            | TMEM63B   | p.L129L | transmembrane protein      | 26 (0.00)  | 31 (0.23) | 0.60 |
| 11-02 | Gp4 Focus 2 | g.chr8:29923613A>G   | Silent            | TMEM66    | p.Y295Y |                            | 31 (0.00)  | 13 (0.38) | 1.03 |
| 11-02 | Gp4 Focus 2 | g.chr8:29923622G>A   | Silent            | TMEM66    | p.Y292Y |                            | 30 (0.00)  | 13 (0.38) | 1.03 |
| 11-02 | Gp4 Focus 2 | g.chr8:128960221G>A  | Silent            | TMEM75    | p.D20D  | transmembrane protein      | 132 (0.00) | 30 (0.33) | 1.14 |
| 11-02 | Gp4 Focus 2 | g.chr1:156255099C>T  | Missense Mutation | TMEM79    | p.P28S  | transmembrane protein      | 19 (0.00)  | 13 (0.54) | 1.44 |
| 11-02 | Gp4 Focus 2 | g.chr1:205053336G>A  | Missense Mutation | TMEM81    | p.A38V  | transmembrane protein      | 30 (0.00)  | 15 (0.40) | 1.07 |
| 11-02 | Gp4 Focus 2 | g.chr9:100286501C>T  | Missense Mutation | TMOD1     | p.R11C  | tropomodulin 1             | 75 (0.00)  | 26 (0.65) | 1.74 |
| 11-02 | Gp4 Focus 2 | g.chr9:100308569G>A  | Missense Mutation | TMOD1     | p.A75T  | tropomodulin 1             | 44 (0.00)  | 17 (0.47) | 1.25 |
| 11-02 | Gp4 Focus 2 | g.chr15:52075002C>T  | Missense Mutation | TMOD2     | p.R237C | tropomodulin 2 (neuron     | 55 (0.02)  | 30 (0.47) | 1.24 |
| 11-02 | Gp4 Focus 2 | g.chr15:52186054C>T  | Missense Mutation | TMOD3     | p.P180L | tropomodulin 3 (ubiquit    | 39 (0.00)  | 35 (0.20) | 0.53 |
| 11-02 | Gp4 Focus 2 | g.chr1:151146920G>A  | Missense Mutation | TMOD4     | p.A76V  | tropomodulin 4 (muscle     | 66 (0.00)  | 53 (0.21) | 0.55 |
| 11-02 | Gp4 Focus 2 | g.chr1:151146971G>A  | Missense Mutation | TMOD4     | p.P59L  | tropomodulin 4 (muscle     | 38 (0.00)  | 57 (0.16) | 0.42 |
| 11-02 | Gp4 Focus 2 | g.chr4:68699101T>A   | Splice Site       | TMPRSS11D |         | transmembrane protease     | 62 (0.00)  | 47 (0.28) | 0.74 |

|       |             |                      |                   |          |          |                                      |            |      |
|-------|-------------|----------------------|-------------------|----------|----------|--------------------------------------|------------|------|
| 11-02 | Gp4 Focus 2 | g.chr11:117785182C>A | Nonsense Mutation | TMPRSS13 | p.E202*  | transmembrane protease 41 (0.00)     | 62 (0.23)  | 0.60 |
| 11-02 | Gp4 Focus 2 | g.chr21:42859288G>A  | Intron            | TMPRSS2  |          | transmembrane protease 54 (0.00)     | 35 (0.14)  | 0.38 |
| 11-02 | Gp4 Focus 2 | g.chr21:42859301C>A  | Intron            | TMPRSS2  |          | transmembrane protease 74 (0.00)     | 27 (0.19)  | 0.49 |
| 11-02 | Gp4 Focus 2 | g.chr21:42877825C>T  | Intron            | TMPRSS2  |          | transmembrane protease 140 (0.01)    | 25 (0.24)  | 0.64 |
| 11-02 | Gp4 Focus 2 | g.chr22:37466551G>A  | Missense Mutation | TMPRSS6  | p.T605I  | transmembrane protease 16 (0.00)     | 10 (0.50)  | 1.33 |
| 11-02 | Gp4 Focus 2 | g.chr19:2410284C>T   | Silent            | TMPRSS9  | p.A348A  | transmembrane protease 31 (0.00)     | 36 (0.17)  | 0.44 |
| 11-02 | Gp4 Focus 2 | g.chr9:117803253C>T  | Missense Mutation | TNC      | p.E1605K | tenascin C 57 (0.00)                 | 18 (0.44)  | 0.93 |
| 11-02 | Gp4 Focus 2 | g.chr6:138200281C>T  | Missense Mutation | TNFAIP3  | p.P567S  | tumor necrosis factor, al40 (0.00)   | 35 (0.46)  | 1.22 |
| 11-02 | Gp4 Focus 2 | g.chr1:173010768C>T  | Silent            | TNFSF18  | p.Q113Q  | tumor necrosis factor (li 72 (0.00)  | 34 (0.32)  | 0.86 |
| 11-02 | Gp4 Focus 2 | g.chr3:170906507G>A  | Missense Mutation | TNIK     | p.A208V  | TRAF2 and NCK intera 46 (0.00)       | 44 (0.36)  | 0.97 |
| 11-02 | Gp4 Focus 2 | g.chr5:150422456C>T  | Splice Site       | TNIP1    |          | TNFAIP3 interacting pr 89 (0.00)     | 144 (0.19) | 0.52 |
| 11-02 | Gp4 Focus 2 | g.chr8:9413801C>T    | Missense Mutation | TNKS     | p.P118S  | tankyrase, TRF1-interac 70 (0.00)    | 31 (0.35)  | 0.95 |
| 11-02 | Gp4 Focus 2 | g.chr8:9437713G>A    | Missense Mutation | TNKS     | p.A3T    | tankyrase, TRF1-interac 76 (0.00)    | 35 (0.17)  | 0.46 |
| 11-02 | Gp4 Focus 2 | g.chr8:9437738G>A    | Missense Mutation | TNKS     | p.G11E   | tankyrase, TRF1-interac 74 (0.00)    | 37 (0.24)  | 0.65 |
| 11-02 | Gp4 Focus 2 | g.chr11:57075961C>T  | Silent            | TNKS1BP1 | p.E1408E | tankyrase 1 binding prot 107 (0.00)  | 56 (0.70)  | 1.86 |
| 11-02 | Gp4 Focus 2 | g.chr1:175116141C>T  | Silent            | TNN      | p.G1278G | tenascin N 30 (0.00)                 | 33 (0.18)  | 0.48 |
| 11-02 | Gp4 Focus 2 | g.chr1:74957806G>C   | Missense Mutation | TNNI3K   | p.S736T  | TNNI3 interacting kinas 33 (0.00)    | 20 (0.25)  | 0.67 |
| 11-02 | Gp4 Focus 2 | g.chr1:175375497G>A  | Silent            | TNR      | p.I118I  | tenascin R 29 (0.00)                 | 17 (0.29)  | 0.78 |
| 11-02 | Gp4 Focus 2 | g.chr1:175375513G>A  | Missense Mutation | TNR      | p.T113I  | tenascin R 28 (0.00)                 | 13 (0.46)  | 1.23 |
| 11-02 | Gp4 Focus 2 | g.chr1:175375517C>A  | Missense Mutation | TNR      | p.V112F  | tenascin R 27 (0.00)                 | 12 (0.42)  | 1.11 |
| 11-02 | Gp4 Focus 2 | g.chr16:24802808C>T  | Nonsense Mutation | TNRC6A   | p.Q949*  | trinucleotide repeat cont 33 (0.00)  | 19 (0.37)  | 0.98 |
| 11-02 | Gp4 Focus 2 | g.chr16:24804831C>T  | Silent            | TNRC6A   | p.A1071A | trinucleotide repeat cont 62 (0.00)  | 28 (0.57)  | 1.52 |
| 11-02 | Gp4 Focus 2 | g.chr22:40704605G>T  | Nonsense Mutation | TNRC6B   | p.E600*  | trinucleotide repeat cont 49 (0.00)  | 35 (0.17)  | 0.46 |
| 11-02 | Gp4 Focus 2 | g.chr17:76045569G>A  | Silent            | TNRC6C   | p.G142G  | trinucleotide repeat cont 49 (0.02)  | 16 (0.44)  | 1.17 |
| 11-02 | Gp4 Focus 2 | g.chr17:76045674G>A  | Silent            | TNRC6C   | p.Q177Q  | trinucleotide repeat cont 36 (0.00)  | 14 (0.79)  | 2.10 |
| 11-02 | Gp4 Focus 2 | g.chr7:47467955C>T   | Missense Mutation | TNS3     | p.G115E  | tensin 3 34 (0.00)                   | 31 (0.16)  | 0.43 |
| 11-02 | Gp4 Focus 2 | g.chr20:43580534C>T  | Missense Mutation | TOMM34   | p.E164K  | translocase of outer mitc 31 (0.00)  | 31 (0.23)  | 0.60 |
| 11-02 | Gp4 Focus 2 | g.chr1:161198840C>T  | Silent            | TOMM40L  | p.H294H  | translocase of outer mitc 32 (0.00)  | 26 (0.31)  | 0.82 |
| 11-02 | Gp4 Focus 2 | g.chr8:144406268C>T  | Silent            | TOP1MT   | p.R189R  | topoisomerase (DNA) I, 32 (0.00)     | 34 (0.15)  | 0.39 |
| 11-02 | Gp4 Focus 2 | g.chr3:25639942C>T   | Silent            | TOP2B    | p.Q1574Q | topoisomerase (DNA) II 34 (0.00)     | 41 (0.37)  | 0.98 |
| 11-02 | Gp4 Focus 2 | g.chr3:133356756G>A  | Silent            | TOPBP1   | p.S828S  | topoisomerase (DNA) II 41 (0.00)     | 42 (0.21)  | 0.57 |
| 11-02 | Gp4 Focus 2 | g.chr1:179886604C>T  | Nonsense Mutation | TOR1AIP1 | p.Q328*  | torsin A interacting prot 258 (0.00) | 34 (0.18)  | 0.47 |
| 11-02 | Gp4 Focus 2 | g.chr1:179886625A>G  | Missense Mutation | TOR1AIP1 | p.R335G  | torsin A interacting prot 255 (0.00) | 39 (0.15)  | 0.41 |
| 11-02 | Gp4 Focus 2 | g.chr16:52484455G>T  | Missense Mutation | TOX3     | p.Q138K  | TOX high mobility grou 31 (0.00)     | 38 (0.50)  | 1.33 |
| 11-02 | Gp4 Focus 2 | g.chr2:24303783C>T   | Silent            | TP53I3   | p.Q175Q  | tumor protein p53 induc 158 (0.00)   | 21 (0.24)  | 0.63 |

|       |             |                      |                   |             |          |                            |            |           |      |
|-------|-------------|----------------------|-------------------|-------------|----------|----------------------------|------------|-----------|------|
| 11-02 | Gp4 Focus 2 | g.chr12:113722424G>A | Missense Mutation | TPCN1       | p.E393K  | two pore segment chann     | 33 (0.00)  | 29 (0.17) | 0.46 |
| 11-02 | Gp4 Focus 2 | g.chr6:125578259C>T  | Silent            | TPD52L1     | p.F147F  | tumor protein D52-like     | 31 (0.00)  | 39 (0.18) | 0.48 |
| 11-02 | Gp4 Focus 2 | g.chr12:72366298G>T  | Splice Site       | TPH2        |          | tryptophan hydroxylase     | 66 (0.00)  | 99 (0.23) | 0.62 |
| 11-02 | Gp4 Focus 2 | g.chr11:6638023G>A   | Missense Mutation | TPP1        | p.A252V  | tripeptidyl peptidase I    | 20 (0.00)  | 16 (0.31) | 0.83 |
| 11-02 | Gp4 Focus 2 | g.chr13:103279443C>T | Missense Mutation | TPP2        | p.A289V  | tripeptidyl peptidase II   | 93 (0.00)  | 58 (0.16) | 0.41 |
| 11-02 | Gp4 Focus 2 | g.chr13:103279456C>T | Silent            | TPP2        | p.S293S  | tripeptidyl peptidase II   | 94 (0.00)  | 53 (0.17) | 0.45 |
| 11-02 | Gp4 Focus 2 | g.chr3:188925229G>A  | Missense Mutation | TPRG1       | p.G19E   | tumor protein p63 regul:   | 40 (0.00)  | 40 (0.30) | 0.80 |
| 11-02 | Gp4 Focus 2 | g.chr3:189028287C>T  | Missense Mutation | TPRG1       | p.P198S  | tumor protein p63 regul:   | 20 (0.00)  | 16 (0.50) | 1.33 |
| 11-02 | Gp4 Focus 2 | g.chr13:45964656G>A  | RNA               | TPT1-AS1    |          | TPT1 antisense RNA 1       | 37 (0.03)  | 33 (0.42) | 1.13 |
| 11-02 | Gp4 Focus 2 | g.chr20:30380615G>A  | Missense Mutation | TPX2        | p.M497I  | TPX2, microtubule-assc     | 55 (0.00)  | 45 (0.16) | 0.41 |
| 11-02 | Gp4 Focus 2 | g.chr2:85069126G>A   | Silent            | TRABD2A     | p.I225I  | TraB domain containing     | 23 (0.00)  | 31 (0.29) | 0.77 |
| 11-02 | Gp4 Focus 2 | g.chr17:27076257G>A  | Missense Mutation | TRAF4       | p.E359K  | TNF receptor-associatec    | 40 (0.00)  | 13 (0.46) | 1.23 |
| 11-02 | Gp4 Focus 2 | g.chr17:27076301C>A  | Silent            | TRAF4       | p.A373A  | TNF receptor-associatec    | 36 (0.00)  | 19 (0.53) | 1.40 |
| 11-02 | Gp4 Focus 2 | g.chr12:112589656G>A | Missense Mutation | TRAFD1      | p.G444E  | TRAF-type zinc finger c    | 43 (0.00)  | 30 (0.27) | 0.71 |
| 11-02 | Gp4 Focus 2 | g.chr3:36873711G>T   | Missense Mutation | TRANK1      | p.L1861I | tetratricopeptide repea    | 52 (0.00)  | 11 (0.73) | 1.94 |
| 11-02 | Gp4 Focus 2 | g.chr3:36875047G>A   | Silent            | TRANK1      | p.T1415T | tetratricopeptide repea    | 31 (0.00)  | 20 (0.25) | 0.67 |
| 11-02 | Gp4 Focus 2 | g.chr14:22434157G>A  | RNA               | TRAV12-3    |          | T cell receptor alpha var  | 27 (0.00)  | 18 (0.44) | 0.65 |
| 11-02 | Gp4 Focus 2 | g.chr14:22434193G>A  | RNA               | TRAV12-3    |          | T cell receptor alpha var  | 20 (0.00)  | 13 (0.46) | 0.68 |
| 11-02 | Gp4 Focus 2 | g.chr14:22521050C>T  | RNA               | TRAV21      |          | T cell receptor alpha var  | 51 (0.00)  | 14 (0.50) | 0.73 |
| 11-02 | Gp4 Focus 2 | g.chr7:142498811G>A  | RNA               | TRBC2       |          | T cell receptor beta cons  | 25 (0.00)  | 18 (0.28) | 0.74 |
| 11-02 | Gp4 Focus 2 | g.chr7:142197691C>A  | lincRNA           | TRBV11-2    |          | T cell receptor beta vari  | 36 (0.00)  | 18 (0.33) | 0.89 |
| 11-02 | Gp4 Focus 2 | g.chr9:33629545G>A   | RNA               | TRBV21OR9-2 |          | T cell receptor beta vari  | 17 (0.00)  | 34 (0.21) | 0.55 |
| 11-02 | Gp4 Focus 2 | g.chr14:22564652G>A  | RNA               | TRDV1       |          | T cell receptor delta vari | 230 (0.00) | 19 (0.37) | 0.54 |
| 11-02 | Gp4 Focus 2 | g.chr6:42224714G>A   | Silent            | TRERF1      | p.D821D  | transcriptional regulatin  | 19 (0.00)  | 25 (0.28) | 0.75 |
| 11-02 | Gp4 Focus 2 | g.chr7:38305246G>A   | RNA               | TRGC1       |          | T cell receptor gamma c    | 149 (0.00) | 41 (0.32) | 0.85 |
| 11-02 | Gp4 Focus 2 | g.chr17:18638478G>A  | Nonsense Mutation | TRIM16L     | p.W251*  | tripartite motif containi  | 45 (0.00)  | 26 (0.38) | 1.03 |
| 11-02 | Gp4 Focus 2 | g.chr1:228596932G>A  | Missense Mutation | TRIM17      | p.T275I  | tripartite motif containi  | 19 (0.00)  | 30 (0.30) | 0.80 |
| 11-02 | Gp4 Focus 2 | g.chr11:6472258G>A   | Silent            | TRIM3       | p.P578P  | tripartite motif containi  | 32 (0.00)  | 24 (0.21) | 0.56 |
| 11-02 | Gp4 Focus 2 | g.chr9:119460545A>T  | Missense Mutation | TRIM32      | p.K175M  | tripartite motif containi  | 36 (0.00)  | 29 (0.31) | 0.65 |
| 11-02 | Gp4 Focus 2 | g.chr5:180651378G>A  | Missense Mutation | TRIM41      | p.E127K  | tripartite motif containi  | 22 (0.00)  | 26 (0.19) | 0.51 |
| 11-02 | Gp4 Focus 2 | g.chr11:35685285G>A  | Missense Mutation | TRIM44      | p.G209D  | tripartite motif containi  | 121 (0.00) | 18 (0.50) | 1.33 |
| 11-02 | Gp4 Focus 2 | g.chr1:155148497G>A  | Silent            | TRIM46      | p.L153L  | tripartite motif containi  | 53 (0.00)  | 53 (0.25) | 0.65 |
| 11-02 | Gp4 Focus 2 | g.chr7:72738755C>A   | Nonsense Mutation | TRIM50      | p.E11*   | tripartite motif containi  | 16 (0.00)  | 36 (0.14) | 0.60 |
| 11-02 | Gp4 Focus 2 | g.chr7:100730631C>T  | Missense Mutation | TRIM56      | p.A13V   | tripartite motif containi  | 30 (0.00)  | 42 (0.17) | 0.44 |
| 11-02 | Gp4 Focus 2 | g.chr11:8641059G>C   | Missense Mutation | TRIM66      | p.I1110M | tripartite motif containi  | 15 (0.00)  | 18 (0.28) | 0.74 |



|       |             |                      |                   |         |          |                            |            |            |      |
|-------|-------------|----------------------|-------------------|---------|----------|----------------------------|------------|------------|------|
| 11-02 | Gp4 Focus 2 | g.chr11:8671396G>A   | Silent            | TRIM66  | p.I16I   | tripartite motif containir | 42 (0.00)  | 18 (0.50)  | 1.33 |
| 11-02 | Gp4 Focus 2 | g.chr10:104414987G>A | Missense Mutation | TRIM8   | p.G273R  | tripartite motif containir | 27 (0.00)  | 54 (0.24)  | 0.64 |
| 11-02 | Gp4 Focus 2 | g.chr2:230679858G>A  | Missense Mutation | TRIP12  | p.S218F  | thyroid hormone receptc    | 75 (0.01)  | 36 (0.19)  | 0.52 |
| 11-02 | Gp4 Focus 2 | g.chr19:13226154G>A  | Missense Mutation | TRMT1   | p.R194C  | tRNA methyltransferase     | 26 (0.00)  | 19 (0.32)  | 0.84 |
| 11-02 | Gp4 Focus 2 | g.chr2:29092467C>T   | Missense Mutation | TRMT61B | p.G226E  | tRNA methyltransferase     | 163 (0.00) | 21 (0.24)  | 0.63 |
| 11-02 | Gp4 Focus 2 | g.chr12:49722991G>A  | Silent            | TROAP   | p.R356R  | trophinin associated pro   | 64 (0.00)  | 33 (0.21)  | 0.57 |
| 11-02 | Gp4 Focus 2 | g.chr8:72975788G>A   | Missense Mutation | TRPA1   | p.P191S  | transient receptor potent  | 23 (0.00)  | 26 (0.46)  | 1.56 |
| 11-02 | Gp4 Focus 2 | g.chr4:122828602G>A  | Missense Mutation | TRPC3   | p.P638L  | transient receptor potent  | 95 (0.00)  | 19 (0.32)  | 0.84 |
| 11-02 | Gp4 Focus 2 | g.chr11:101374793C>T | Missense Mutation | TRPC6   | p.E303K  | transient receptor potent  | 24 (0.00)  | 26 (0.23)  | 0.62 |
| 11-02 | Gp4 Focus 2 | g.chr15:31358283G>A  | Silent            | TRPM1   | p.N262N  | transient receptor potent  | 22 (0.00)  | 25 (0.72)  | 1.92 |
| 11-02 | Gp4 Focus 2 | g.chr9:77353401G>A   | Silent            | TRPM6   | p.L1900L | transient receptor potent  | 30 (0.00)  | 14 (0.36)  | 1.15 |
| 11-02 | Gp4 Focus 2 | g.chr7:142573326G>A  | Silent            | TRPV6   | p.Y339Y  | transient receptor potent  | 42 (0.00)  | 65 (0.26)  | 0.70 |
| 11-02 | Gp4 Focus 2 | g.chr7:142573329C>T  | Silent            | TRPV6   | p.L338L  | transient receptor potent  | 25 (0.00)  | 66 (0.30)  | 0.81 |
| 11-02 | Gp4 Focus 2 | g.chr13:45010762C>T  | Start Codon SNP   | TSC22D1 | p.M1I    | TSC22 domain family, 1     | 176 (0.00) | 66 (0.44)  | 1.17 |
| 11-02 | Gp4 Focus 2 | g.chr13:45149714C>T  | Missense Mutation | TSC22D1 | p.G166E  | TSC22 domain family, 1     | 30 (0.00)  | 12 (0.50)  | 1.33 |
| 11-02 | Gp4 Focus 2 | g.chr17:73519744G>A  | Splice Site       | TSEN54  | p.R438R  | TSEN54 tRNA splicing       | 22 (0.00)  | 10 (0.60)  | 1.60 |
| 11-02 | Gp4 Focus 2 | g.chr12:58180005C>T  | Silent            | TSEFM   | p.L97L   | Ts translation elongatio   | 29 (0.00)  | 23 (0.22)  | 0.58 |
| 11-02 | Gp4 Focus 2 | g.chr1:115576721A>T  | Missense Mutation | TSHB    | p.Y97F   | thyroid stimulating horn   | 94 (0.00)  | 11 (0.55)  | 1.14 |
| 11-02 | Gp4 Focus 2 | g.chr19:11408922C>T  | Silent            | TSPAN16 | p.G58G   | tetraspanin 16             | 34 (0.00)  | 14 (0.43)  | 1.14 |
| 11-02 | Gp4 Focus 2 | g.chr11:44948263C>T  | Silent            | TSPAN18 | p.Y218Y  | tetraspanin 18             | 38 (0.00)  | 17 (0.94)  | 2.51 |
| 11-02 | Gp4 Focus 2 | g.chr7:128806629G>T  | Missense Mutation | TSPAN33 | p.C157F  | tetraspanin 33             | 64 (0.00)  | 35 (0.14)  | 0.38 |
| 11-02 | Gp4 Focus 2 | g.chr17:2235560C>T   | Missense Mutation | TSR1    | p.A467T  | TSR1, 20S rRNA accun       | 50 (0.00)  | 19 (0.37)  | 0.98 |
| 11-02 | Gp4 Focus 2 | g.chr17:2235566C>T   | Missense Mutation | TSR1    | p.E465K  | TSR1, 20S rRNA accun       | 47 (0.00)  | 19 (0.37)  | 0.98 |
| 11-02 | Gp4 Focus 2 | g.chr17:2236302C>T   | Missense Mutation | TSR1    | p.E420K  | TSR1, 20S rRNA accun       | 74 (0.00)  | 24 (0.33)  | 0.89 |
| 11-02 | Gp4 Focus 2 | g.chr17:2236311C>T   | Missense Mutation | TSR1    | p.D417N  | TSR1, 20S rRNA accun       | 72 (0.00)  | 25 (0.32)  | 0.85 |
| 11-02 | Gp4 Focus 2 | g.chr15:43086925C>T  | Silent            | TTBK2   | p.K264K  | tau tubulin kinase 2       | 26 (0.00)  | 13 (0.46)  | 1.23 |
| 11-02 | Gp4 Focus 2 | g.chr5:34840816G>T   | Missense Mutation | TTC23L  | p.D14Y   | tetratricopeptide repeat   | 155 (0.00) | 107 (0.15) | 0.40 |
| 11-02 | Gp4 Focus 2 | g.chr2:32897407G>A   | Missense Mutation | TTC27   | p.M336I  | tetratricopeptide repeat   | 42 (0.00)  | 43 (0.35)  | 0.93 |
| 11-02 | Gp4 Focus 2 | g.chr2:178416795C>T  | Missense Mutation | TTC30B  | p.G233S  | tetratricopeptide repeat   | 64 (0.00)  | 32 (0.31)  | 0.83 |
| 11-02 | Gp4 Focus 2 | g.chr5:94861333G>A   | Silent            | TTC37   | p.S393S  | tetratricopeptide repeat   | 88 (0.00)  | 62 (0.66)  | 1.76 |
| 11-02 | Gp4 Focus 2 | g.chr14:71134411C>T  | Silent            | TTC9    | p.D179D  | tetratricopeptide repeat   | 92 (0.01)  | 30 (0.17)  | 0.44 |
| 11-02 | Gp4 Focus 2 | g.chr1:117617555C>G  | Missense Mutation | TTF2    | p.H117D  | transcription terminatio   | 31 (0.00)  | 15 (0.33)  | 0.70 |
| 11-02 | Gp4 Focus 2 | g.chr20:36640417G>A  | Missense Mutation | TTI1    | p.T601I  | TELO2 interacting prote    | 83 (0.00)  | 33 (0.18)  | 0.48 |
| 11-02 | Gp4 Focus 2 | g.chr20:36641891G>A  | Nonsense Mutation | TTI1    | p.Q110*  | TELO2 interacting prote    | 57 (0.00)  | 13 (0.46)  | 1.23 |
| 11-02 | Gp4 Focus 2 | g.chr22:43464591C>A  | Missense Mutation | TTLL1   | p.V110F  | tubulin tyrosine ligase-li | 24 (0.00)  | 30 (0.20)  | 0.53 |

|       |             |                     |                   |         |           |                                     |            |           |      |
|-------|-------------|---------------------|-------------------|---------|-----------|-------------------------------------|------------|-----------|------|
| 11-02 | Gp4 Focus 2 | g.chr6:167755081G>A | Missense Mutation | TTLL2   | p.A565T   | tubulin tyrosine ligase-li22 (0.00) | 20 (0.25)  | 0.67      |      |
| 11-02 | Gp4 Focus 2 | g.chr14:76149971G>A | Missense Mutation | TTLL5   | p.E115K   | tubulin tyrosine ligase-li69 (0.00) | 21 (0.38)  | 1.02      |      |
| 11-02 | Gp4 Focus 2 | g.chr14:76259418G>A | Missense Mutation | TTLL5   | p.S1064N  | tubulin tyrosine ligase-li74 (0.00) | 38 (0.18)  | 0.49      |      |
| 11-02 | Gp4 Focus 2 | g.chr2:179396658G>T | Nonsense Mutation | TTN     | p.S34895* | titin                               | 15 (0.00)  | 40 (0.15) | 0.40 |
| 11-02 | Gp4 Focus 2 | g.chr2:179397366G>A | Missense Mutation | TTN     | p.S34659F | titin                               | 111 (0.00) | 45 (0.44) | 1.19 |
| 11-02 | Gp4 Focus 2 | g.chr2:179403771G>A | Missense Mutation | TTN     | p.P32964L | titin                               | 61 (0.00)  | 21 (0.33) | 0.89 |
| 11-02 | Gp4 Focus 2 | g.chr2:179429322G>A | Silent            | TTN     | p.A27179A | titin                               | 27 (0.00)  | 38 (0.18) | 0.49 |
| 11-02 | Gp4 Focus 2 | g.chr2:179434585G>A | Missense Mutation | TTN     | p.S25425F | titin                               | 61 (0.00)  | 33 (0.18) | 0.48 |
| 11-02 | Gp4 Focus 2 | g.chr2:179439690G>A | Silent            | TTN     | p.V23723V | titin                               | 43 (0.00)  | 22 (0.27) | 0.73 |
| 11-02 | Gp4 Focus 2 | g.chr2:179462359G>A | Silent            | TTN     | p.I19150I | titin                               | 61 (0.00)  | 13 (0.77) | 2.05 |
| 11-02 | Gp4 Focus 2 | g.chr2:179529450G>A | Nonsense Mutation | TTN     | p.Q12045* | titin                               | 64 (0.00)  | 29 (0.48) | 1.29 |
| 11-02 | Gp4 Focus 2 | g.chr2:179529649G>A | Silent            | TTN     | p.P12016P | titin                               | 45 (0.00)  | 15 (0.60) | 1.60 |
| 11-02 | Gp4 Focus 2 | g.chr2:179544132G>A | Missense Mutation | TTN     | p.P11226S | titin                               | 97 (0.01)  | 32 (0.78) | 2.08 |
| 11-02 | Gp4 Focus 2 | g.chr2:179598351T>A | Missense Mutation | TTN     | p.L5255F  | titin                               | 141 (0.00) | 25 (0.32) | 0.85 |
| 11-02 | Gp4 Focus 2 | g.chr2:179605561G>A | Silent            | TTN     | p.C4133C  | titin                               | 130 (0.01) | 85 (0.18) | 0.47 |
| 11-02 | Gp4 Focus 2 | g.chr2:179664331G>A | Missense Mutation | TTN     | p.P266L   | titin                               | 27 (0.00)  | 41 (0.61) | 1.63 |
| 11-02 | Gp4 Focus 2 | g.chr11:8118952G>A  | Missense Mutation | TUB     | p.D289N   | tubby bipartite transcrip           | 23 (0.00)  | 28 (0.71) | 1.90 |
| 11-02 | Gp4 Focus 2 | g.chr12:49522569C>T | Silent            | TUBA1B  | p.Q176Q   | tubulin, alpha 1b                   | 30 (0.00)  | 41 (0.20) | 0.52 |
| 11-02 | Gp4 Focus 2 | g.chr12:49522581G>A | Silent            | TUBA1B  | p.Y172Y   | tubulin, alpha 1b                   | 33 (0.00)  | 47 (0.17) | 0.45 |
| 11-02 | Gp4 Focus 2 | g.chr12:49666119C>T | Silent            | TUBA1C  | p.L153L   | tubulin, alpha 1c                   | 16 (0.00)  | 13 (0.54) | 1.44 |
| 11-02 | Gp4 Focus 2 | g.chr12:49666823G>A | Nonsense Mutation | TUBA1C  | p.W388*   | tubulin, alpha 1c                   | 74 (0.00)  | 22 (0.36) | 0.97 |
| 11-02 | Gp4 Focus 2 | g.chr2:132238049G>T | Silent            | TUBA3D  | p.P261P   | tubulin, alpha 3d                   | 36 (0.00)  | 21 (0.29) | 0.92 |
| 11-02 | Gp4 Focus 2 | g.chr20:57599118C>A | Missense Mutation | TUBB1   | p.F212L   | tubulin, beta 1 class VI            | 69 (0.00)  | 26 (0.19) | 0.51 |
| 11-02 | Gp4 Focus 2 | g.chr16:90161729C>T | RNA               | TUBB8P7 |           | tubulin, beta 8 class VII           | 24 (0.00)  | 16 (0.31) | 0.83 |
| 11-02 | Gp4 Focus 2 | g.chr22:31369004G>A | RNA               | TUG1    |           | taurine up-regulated 1 (r           | 85 (0.00)  | 56 (0.32) | 0.86 |
| 11-02 | Gp4 Focus 2 | g.chr12:3042656G>A  | Missense Mutation | TULP3   | p.D257N   | tubby like protein 3                | 33 (0.00)  | 14 (0.43) | 1.14 |
| 11-02 | Gp4 Focus 2 | g.chr12:3043631C>T  | Silent            | TULP3   | p.T276T   | tubby like protein 3                | 20 (0.00)  | 27 (0.22) | 0.59 |
| 11-02 | Gp4 Focus 2 | g.chr7:19738143C>T  | Nonsense Mutation | TWISTNB | p.W271*   | TWIST neighbor                      | 42 (0.00)  | 53 (0.21) | 0.55 |
| 11-02 | Gp4 Focus 2 | g.chr9:12695757G>A  | Missense Mutation | TYRP1   | p.E210K   | tyrosinase-related protei           | 46 (0.00)  | 29 (0.21) | 0.67 |
| 11-02 | Gp4 Focus 2 | g.chr4:68514860C>T  | Missense Mutation | UBA6    | p.A392T   | ubiquitin-like modifier ε           | 64 (0.00)  | 23 (0.30) | 0.81 |
| 11-02 | Gp4 Focus 2 | g.chr9:138847147C>T | Missense Mutation | UBAC1   | p.D85N    | UBA domain containing               | 39 (0.00)  | 22 (0.41) | 1.09 |
| 11-02 | Gp4 Focus 2 | g.chr1:154227784C>T | Missense Mutation | UBAP2L  | p.T689I   | ubiquitin associated pro            | 41 (0.00)  | 19 (0.42) | 1.12 |
| 11-02 | Gp4 Focus 2 | g.chr19:59068460G>A | Silent            | UBE2M   | p.L58L    | ubiquitin-conjugating er            | 21 (0.00)  | 29 (0.45) | 1.20 |
| 11-02 | Gp4 Focus 2 | g.chr17:74394607G>T | Silent            | UBE2O   | p.G614G   | ubiquitin-conjugating er            | 26 (0.00)  | 22 (0.27) | 0.73 |
| 11-02 | Gp4 Focus 2 | g.chr15:76168580G>A | Missense Mutation | UBE2Q2  | p.R214K   | ubiquitin-conjugating er            | 62 (0.00)  | 58 (0.33) | 0.87 |

|       |             |                      |                   |           |          |                                     |           |      |
|-------|-------------|----------------------|-------------------|-----------|----------|-------------------------------------|-----------|------|
| 11-02 | Gp4 Focus 2 | g.chr17:46990269C>T  | Missense Mutation | UBE2Z     | p.P155L  | ubiquitin-conjugating er 40 (0.00)  | 49 (0.14) | 0.38 |
| 11-02 | Gp4 Focus 2 | g.chr16:23569581G>A  | Silent            | UBFD1     | p.Q112Q  | ubiquitin family domain28 (0.00)    | 31 (0.26) | 0.69 |
| 11-02 | Gp4 Focus 2 | g.chr7:138969274G>T  | Missense Mutation | UBN2      | p.R1208I | ubinnuclein 2 35 (0.00)             | 31 (0.23) | 0.60 |
| 11-02 | Gp4 Focus 2 | g.chr6:42630006G>A   | Missense Mutation | UBR2      | p.C1176Y | ubiquitin protein ligase 118 (0.00) | 20 (0.65) | 1.73 |
| 11-02 | Gp4 Focus 2 | g.chr1:19440206G>A   | Missense Mutation | UBR4      | p.S3815F | ubiquitin protein ligase 150 (0.00) | 62 (0.18) | 0.47 |
| 11-02 | Gp4 Focus 2 | g.chr1:19440230C>T   | Missense Mutation | UBR4      | p.C3807Y | ubiquitin protein ligase 156 (0.00) | 64 (0.23) | 0.62 |
| 11-02 | Gp4 Focus 2 | g.chr1:19467886T>A   | Missense Mutation | UBR4      | p.M2815L | ubiquitin protein ligase 117 (0.00) | 14 (0.50) | 1.33 |
| 11-02 | Gp4 Focus 2 | g.chr1:19478832G>A   | Missense Mutation | UBR4      | p.T2324I | ubiquitin protein ligase 162 (0.00) | 22 (0.27) | 0.73 |
| 11-02 | Gp4 Focus 2 | g.chr1:19491361C>T   | Silent            | UBR4      | p.Q1481Q | ubiquitin protein ligase 130 (0.00) | 33 (0.30) | 0.81 |
| 11-02 | Gp4 Focus 2 | g.chr1:19511610G>T   | Missense Mutation | UBR4      | p.R641S  | ubiquitin protein ligase 141 (0.00) | 21 (0.38) | 1.02 |
| 11-02 | Gp4 Focus 2 | g.chr1:19511644C>T   | Silent            | UBR4      | p.Q629Q  | ubiquitin protein ligase 140 (0.00) | 21 (0.38) | 1.02 |
| 11-02 | Gp4 Focus 2 | g.chr8:103297785G>A  | Missense Mutation | UBR5      | p.P1808S | ubiquitin protein ligase 150 (0.00) | 19 (0.53) | 1.40 |
| 11-02 | Gp4 Focus 2 | g.chr8:103307862G>A  | Splice Site       | UBR5      |          | ubiquitin protein ligase 164 (0.00) | 29 (0.21) | 0.55 |
| 11-02 | Gp4 Focus 2 | g.chr10:99327838G>A  | Missense Mutation | UBTD1     | p.A80T   | ubiquitin domain containi21 (0.00)  | 49 (0.31) | 0.82 |
| 11-02 | Gp4 Focus 2 | g.chr5:171639034G>A  | Missense Mutation | UBTD2     | p.R169C  | ubiquitin domain containi67 (0.01)  | 43 (0.23) | 0.62 |
| 11-02 | Gp4 Focus 2 | g.chr9:134401363G>A  | Splice Site       | UCK1      | p.T202I  | uridine-cytidine kinase 125 (0.00)  | 33 (0.27) | 0.73 |
| 11-02 | Gp4 Focus 2 | g.chr11:73687963G>A  | Missense Mutation | UCP2      | p.A146V  | uncoupling protein 2 (m20 (0.00)    | 40 (0.68) | 1.80 |
| 11-02 | Gp4 Focus 2 | g.chr1:161126778C>A  | Missense Mutation | UFC1      | p.F54L   | ubiquitin-fold modifier 133 (0.00)  | 26 (0.27) | 0.72 |
| 11-02 | Gp4 Focus 2 | g.chr2:234676937G>A  | Missense Mutation | UGT1A6    | p.V385I  | UDP glucuronosyltransf21 (0.00)     | 40 (0.20) | 0.53 |
| 11-02 | Gp4 Focus 2 | g.chr12:100478296G>A | Missense Mutation | UHRF1BP1L | p.P416S  | UHRF1 binding protein 46 (0.00)     | 82 (0.27) | 0.72 |
| 11-02 | Gp4 Focus 2 | g.chr5:176370393G>A  | Missense Mutation | UIMC1     | p.P514S  | ubiquitin interaction mo68 (0.00)   | 40 (0.15) | 0.40 |
| 11-02 | Gp4 Focus 2 | g.chr21:43541228C>T  | Silent            | UMODL1    | p.D907D  | uromodulin-like 1 38 (0.00)         | 43 (0.16) | 0.43 |
| 11-02 | Gp4 Focus 2 | g.chr9:35243322C>T   | Silent            | UNC13B    | p.Y143Y  | unc-13 homolog B (C. e96 (0.00)     | 66 (0.21) | 0.57 |
| 11-02 | Gp4 Focus 2 | g.chr9:35399209G>A   | Silent            | UNC13B    | p.L1293L | unc-13 homolog B (C. e30 (0.00)     | 18 (0.28) | 0.74 |
| 11-02 | Gp4 Focus 2 | g.chr15:54306980G>A  | Missense Mutation | UNC13C    | p.S627N  | unc-13 homolog C (C. e52 (0.00)     | 44 (0.18) | 0.48 |
| 11-02 | Gp4 Focus 2 | g.chr17:73831004C>T  | Silent            | UNC13D    | p.V663V  | unc-13 homolog D (C. e35 (0.00)     | 49 (0.31) | 0.82 |
| 11-02 | Gp4 Focus 2 | g.chr14:94100969G>A  | Missense Mutation | UNC79     | p.S1763N | unc-79 homolog (C. ele752 (0.00)    | 77 (0.14) | 0.38 |
| 11-02 | Gp4 Focus 2 | g.chr2:210678443C>T  | Nonsense Mutation | UNC80     | p.R360*  | unc-80 homolog (C. ele751 (0.00)    | 19 (0.26) | 0.70 |
| 11-02 | Gp4 Focus 2 | g.chr2:210782666C>A  | Missense Mutation | UNC80     | p.A1661E | unc-80 homolog (C. ele716 (0.00)    | 19 (0.26) | 0.70 |
| 11-02 | Gp4 Focus 2 | g.chr19:18974285C>A  | Nonsense Mutation | UPF1      | p.S880*  | UPF1 regulator of nons619 (0.00)    | 98 (0.28) | 0.73 |
| 11-02 | Gp4 Focus 2 | g.chr10:11997364G>A  | Missense Mutation | UPF2      | p.S906F  | UPF2 regulator of nons634 (0.00)    | 11 (0.45) | 1.52 |
| 11-02 | Gp4 Focus 2 | g.chr7:48139385G>A   | Splice Site       | UPP1      |          | uridine phosphorylase 1 40 (0.00)   | 31 (0.26) | 0.69 |
| 11-02 | Gp4 Focus 2 | g.chr2:158974411G>A  | Missense Mutation | UPP2      | p.D139N  | uridine phosphorylase 2 68 (0.00)   | 39 (0.15) | 0.41 |
| 11-02 | Gp4 Focus 2 | g.chr2:158991377G>A  | Missense Mutation | UPP2      | p.R310K  | uridine phosphorylase 2 51 (0.00)   | 34 (0.24) | 0.63 |
| 11-02 | Gp4 Focus 2 | g.chr2:158991399C>T  | Silent            | UPP2      | p.D317D  | uridine phosphorylase 2 51 (0.00)   | 34 (0.26) | 0.71 |

|       |             |                      |                   |        |          |                           |            |            |      |
|-------|-------------|----------------------|-------------------|--------|----------|---------------------------|------------|------------|------|
| 11-02 | Gp4 Focus 2 | g.chr21:33745974C>T  | Silent            | URB1   | p.V286V  | URB1 ribosome biogen      | 37 (0.00)  | 41 (0.66)  | 1.76 |
| 11-02 | Gp4 Focus 2 | g.chr1:229772088G>A  | Missense Mutation | URB2   | p.M576I  | URB2 ribosome biogen      | 35 (0.00)  | 74 (0.19)  | 0.50 |
| 11-02 | Gp4 Focus 2 | g.chr1:229787071T>A  | Splice Site       | URB2   |          | URB2 ribosome biogen      | 24 (0.00)  | 15 (0.47)  | 1.24 |
| 11-02 | Gp4 Focus 2 | g.chr1:215847811C>T  | Missense Mutation | USH2A  | p.R4481K | Usher syndrome 2A (au     | 33 (0.00)  | 19 (0.47)  | 1.26 |
| 11-02 | Gp4 Focus 2 | g.chr1:62914196C>T   | Missense Mutation | USP1   | p.S494L  | ubiquitin specific peptid | 24 (0.00)  | 22 (0.32)  | 0.85 |
| 11-02 | Gp4 Focus 2 | g.chr16:84773939C>T  | Silent            | USP10  | p.L39L   | ubiquitin specific peptid | 77 (0.00)  | 32 (0.25)  | 0.67 |
| 11-02 | Gp4 Focus 2 | g.chr16:84778297T>C  | Silent            | USP10  | p.T70T   | ubiquitin specific peptid | 152 (0.00) | 17 (0.35)  | 0.94 |
| 11-02 | Gp4 Focus 2 | g.chr11:119229502C>T | Silent            | USP2   | p.R406R  | ubiquitin specific peptid | 20 (0.00)  | 30 (0.20)  | 0.53 |
| 11-02 | Gp4 Focus 2 | g.chr1:161135217G>A  | Missense Mutation | USP21  | p.E560K  | ubiquitin specific peptid | 17 (0.00)  | 10 (0.60)  | 1.60 |
| 11-02 | Gp4 Focus 2 | g.chr1:55613367G>A   | Silent            | USP24  | p.G691G  | ubiquitin specific peptid | 50 (0.00)  | 24 (0.21)  | 0.56 |
| 11-02 | Gp4 Focus 2 | g.chr11:113670056G>A | Missense Mutation | USP28  | p.P1047L | ubiquitin specific peptid | 40 (0.00)  | 29 (0.17)  | 0.46 |
| 11-02 | Gp4 Focus 2 | g.chr12:109519824G>A | Splice Site       | USP30  | p.K258K  | ubiquitin specific peptid | 45 (0.00)  | 45 (0.16)  | 0.41 |
| 11-02 | Gp4 Focus 2 | g.chr16:23096953A>G  | Silent            | USP31  | p.T551T  | ubiquitin specific peptid | 76 (0.00)  | 25 (0.20)  | 0.53 |
| 11-02 | Gp4 Focus 2 | g.chr17:58288845C>T  | Missense Mutation | USP32  | p.S737N  | ubiquitin specific peptid | 31 (0.00)  | 42 (0.29)  | 0.76 |
| 11-02 | Gp4 Focus 2 | g.chr2:61441451C>T   | Missense Mutation | USP34  | p.C2809Y | ubiquitin specific peptid | 66 (0.00)  | 50 (0.16)  | 0.43 |
| 11-02 | Gp4 Focus 2 | g.chr2:61575125C>A   | Missense Mutation | USP34  | p.C722F  | ubiquitin specific peptid | 16 (0.00)  | 35 (0.14)  | 0.38 |
| 11-02 | Gp4 Focus 2 | g.chr4:53468111G>A   | Silent            | USP46  | p.L278L  | ubiquitin specific peptid | 54 (0.00)  | 72 (0.19)  | 0.52 |
| 11-02 | Gp4 Focus 2 | g.chr11:11969656G>A  | Missense Mutation | USP47  | p.D1106N | ubiquitin specific peptid | 90 (0.01)  | 15 (0.40)  | 1.07 |
| 11-02 | Gp4 Focus 2 | g.chr12:6971709G>A   | Silent            | USP5   | p.V583V  | ubiquitin specific peptid | 37 (0.00)  | 16 (0.31)  | 0.83 |
| 11-02 | Gp4 Focus 2 | g.chr10:75276980C>G  | Silent            | USP54  | p.L1068L | ubiquitin specific peptid | 61 (0.00)  | 18 (0.50)  | 1.33 |
| 11-02 | Gp4 Focus 2 | g.chr10:11505240C>T  | Missense Mutation | USP6NL | p.A563T  | USP6 N-terminal like      | 30 (0.00)  | 36 (0.19)  | 0.65 |
| 11-02 | Gp4 Focus 2 | g.chrX:41057873C>T   | Silent            | USP9X  | p.V1491V | ubiquitin specific peptid | 21 (0.00)  | 21 (0.52)  | 0.87 |
| 11-02 | Gp4 Focus 2 | g.chr13:31233114C>T  | Missense Mutation | USPL1  | p.T967I  | ubiquitin specific peptid | 22 (0.00)  | 35 (0.40)  | 1.07 |
| 11-02 | Gp4 Focus 2 | g.chr13:52604415C>A  | Missense Mutation | UTP14C | p.P492Q  | UTP14, U3 small nucle     | 188 (0.01) | 103 (0.17) | 0.47 |
| 11-02 | Gp4 Focus 2 | g.chr4:71555794G>A   | Missense Mutation | UTP3   | p.G467D  | UTP3, small subunit (S    | 135 (0.00) | 60 (0.33)  | 0.89 |
| 11-02 | Gp4 Focus 2 | g.chr6:144814583G>C  | Silent            | UTRN   | p.L1528L | utrophin                  | 42 (0.00)  | 30 (0.17)  | 0.44 |
| 11-02 | Gp4 Focus 2 | g.chr6:144820435G>A  | Missense Mutation | UTRN   | p.A1546T | utrophin                  | 51 (0.00)  | 27 (0.22)  | 0.59 |
| 11-02 | Gp4 Focus 2 | g.chr11:75851803C>A  | Missense Mutation | UVRAG  | p.S110R  | UV radiation resistance   | 56 (0.00)  | 10 (0.50)  | 1.33 |
| 11-02 | Gp4 Focus 2 | g.chr11:75852420C>A  | Missense Mutation | UVRAG  | p.S316Y  | UV radiation resistance   | 55 (0.00)  | 34 (0.15)  | 0.39 |
| 11-02 | Gp4 Focus 2 | g.chr2:106717565C>T  | Silent            | UXS1   | p.V311V  | UDP-glucuronate decarl    | 19 (0.00)  | 14 (0.43)  | 1.14 |
| 11-02 | Gp4 Focus 2 | g.chr16:70765435G>A  | Missense Mutation | VAC14  | p.R542W  | Vac14 homolog (S. cere    | 42 (0.00)  | 13 (0.38)  | 1.03 |
| 11-02 | Gp4 Focus 2 | g.chr1:213146187G>A  | Missense Mutation | VASH2  | p.E255K  | vasohibin 2               | 18 (0.00)  | 10 (0.70)  | 1.87 |
| 11-02 | Gp4 Focus 2 | g.chr1:213146197G>A  | Missense Mutation | VASH2  | p.S258N  | vasohibin 2               | 20 (0.00)  | 11 (0.64)  | 1.70 |
| 11-02 | Gp4 Focus 2 | g.chr1:101198024G>T  | Nonsense Mutation | VCAM1  | p.E526*  | vascular cell adhesion r  | 51 (0.00)  | 27 (0.22)  | 0.59 |
| 11-02 | Gp4 Focus 2 | g.chr1:101198225G>A  | Missense Mutation | VCAM1  | p.E593K  | vascular cell adhesion r  | 38 (0.00)  | 41 (0.29)  | 0.78 |

|       |             |                      |                   |         |          |                                    |            |      |
|-------|-------------|----------------------|-------------------|---------|----------|------------------------------------|------------|------|
| 11-02 | Gp4 Focus 2 | g.chr9:35057491G>A   | Nonsense Mutation | VCP     | p.R733*  | valosin containing prote 27 (0.00) | 39 (0.21)  | 0.55 |
| 11-02 | Gp4 Focus 2 | g.chr9:35068274C>G   | Missense Mutation | VCP     | p.D35H   | valosin containing prote 56 (0.00) | 55 (0.33)  | 0.87 |
| 11-02 | Gp4 Focus 2 | g.chr9:35068312C>A   | Missense Mutation | VCP     | p.R22L   | valosin containing prote 64 (0.00) | 63 (0.52)  | 1.40 |
| 11-02 | Gp4 Focus 2 | g.chr9:35068314G>A   | Silent            | VCP     | p.N21N   | valosin containing prote 64 (0.00) | 64 (0.52)  | 1.38 |
| 11-02 | Gp4 Focus 2 | g.chr8:67576857G>A   | Silent            | VCPIP1  | p.I779I  | valosin containing prote 77 (0.01) | 38 (0.26)  | 0.89 |
| 11-02 | Gp4 Focus 2 | g.chr19:57966931G>A  | Silent            | VN1R1   | p.T308T  | vomeronasal 1 receptor 32 (0.00)   | 26 (0.27)  | 0.72 |
| 11-02 | Gp4 Focus 2 | g.chr3:51452215C>A   | Missense Mutation | VPRBP   | p.D785Y  | Vpr (HIV-1) binding pr 56 (0.00)   | 32 (0.47)  | 1.25 |
| 11-02 | Gp4 Focus 2 | g.chr1:12368665G>A   | Missense Mutation | VPS13D  | p.R2206K | vacuolar protein sorting 27 (0.00) | 82 (0.26)  | 0.68 |
| 11-02 | Gp4 Focus 2 | g.chr1:12368669G>A   | Silent            | VPS13D  | p.L2207L | vacuolar protein sorting 26 (0.00) | 77 (0.26)  | 0.69 |
| 11-02 | Gp4 Focus 2 | g.chr1:12405486C>A   | Missense Mutation | VPS13D  | p.Q2981K | vacuolar protein sorting 72 (0.00) | 23 (0.52)  | 1.39 |
| 11-02 | Gp4 Focus 2 | g.chr1:12568974G>A   | Missense Mutation | VPS13D  | p.V4355I | vacuolar protein sorting 59 (0.00) | 36 (0.19)  | 0.52 |
| 11-02 | Gp4 Focus 2 | g.chr20:2841704C>T   | Missense Mutation | VPS16   | p.T240I  | vacuolar protein sorting 61 (0.00) | 40 (0.45)  | 1.20 |
| 11-02 | Gp4 Focus 2 | g.chr17:40925850G>A  | Silent            | VPS25   | p.V51V   | vacuolar protein sorting 26 (0.00) | 10 (0.70)  | 1.87 |
| 11-02 | Gp4 Focus 2 | g.chr12:122745942G>A | Missense Mutation | VPS33A  | p.R117C  | vacuolar protein sorting 85 (0.00) | 30 (0.23)  | 0.62 |
| 11-02 | Gp4 Focus 2 | g.chr15:91549642G>A  | Missense Mutation | VPS33B  | p.S271F  | vacuolar protein sorting 29 (0.00) | 21 (0.24)  | 0.78 |
| 11-02 | Gp4 Focus 2 | g.chr1:151150503G>A  | Silent            | VPS72   | p.P227P  | vacuolar protein sorting 52 (0.00) | 26 (0.27)  | 0.72 |
| 11-02 | Gp4 Focus 2 | g.chr10:116014694G>A | Missense Mutation | VWA2    | p.V50M   | von Willebrand factor A 15 (0.00)  | 22 (0.41)  | 1.09 |
| 11-02 | Gp4 Focus 2 | g.chr2:215440449G>A  | Missense Mutation | VWC2L   | p.V192M  | von Willebrand factor C 65 (0.00)  | 32 (0.44)  | 1.17 |
| 11-02 | Gp4 Focus 2 | g.chr2:215440523C>A  | Nonsense Mutation | VWC2L   | p.C216*  | von Willebrand factor C 60 (0.00)  | 17 (0.53)  | 1.41 |
| 11-02 | Gp4 Focus 2 | g.chr1:119619134G>A  | Nonsense Mutation | WARS2   | p.Q63*   | tryptophanyl tRNA synt 44 (0.00)   | 26 (0.23)  | 0.48 |
| 11-02 | Gp4 Focus 2 | g.chr6:110423330G>A  | Missense Mutation | WASF1   | p.P328L  | WAS protein family, m 92 (0.00)    | 101 (0.18) | 0.48 |
| 11-02 | Gp4 Focus 2 | g.chr7:123332706G>A  | Missense Mutation | WASL    | p.P348S  | Wiskott-Aldrich syndrom 21 (0.00)  | 87 (0.29)  | 0.77 |
| 11-02 | Gp4 Focus 2 | g.chr13:41639401G>T  | Missense Mutation | WBP4    | p.L80F   | WW domain binding pr 28 (0.00)     | 26 (0.19)  | 0.51 |
| 11-02 | Gp4 Focus 2 | g.chr7:71036328G>A   | Missense Mutation | WBSCR17 | p.G341S  | Williams-Beuren syndrom 35 (0.00)  | 18 (0.28)  | 1.20 |
| 11-02 | Gp4 Focus 2 | g.chr4:85661554G>A   | Nonsense Mutation | WDFY3   | p.Q2084* | WD repeat and FYVE d 24 (0.00)     | 11 (0.45)  | 1.21 |
| 11-02 | Gp4 Focus 2 | g.chr10:122643329G>T | Nonsense Mutation | WDR11   | p.E593*  | WD repeat domain 11 42 (0.00)      | 25 (0.24)  | 0.64 |
| 11-02 | Gp4 Focus 2 | g.chr1:118492672C>A  | Silent            | WDR3    | p.V555V  | WD repeat domain 3 227 (0.00)      | 24 (0.29)  | 0.61 |
| 11-02 | Gp4 Focus 2 | g.chr9:116094187C>T  | Splice Site       | WDR31   | p.G39D   | WD repeat domain 31 68 (0.00)      | 31 (0.61)  | 1.63 |
| 11-02 | Gp4 Focus 2 | g.chr9:116094284G>A  | Nonsense Mutation | WDR31   | p.Q7*    | WD repeat domain 31 82 (0.00)      | 28 (0.18)  | 0.48 |
| 11-02 | Gp4 Focus 2 | g.chr2:128467302C>T  | Missense Mutation | WDR33   | p.R1146Q | WD repeat domain 33 50 (0.00)      | 22 (0.27)  | 0.88 |
| 11-02 | Gp4 Focus 2 | g.chr21:44270192C>T  | Silent            | WDR4    | p.K402K  | WD repeat domain 4 38 (0.00)       | 41 (0.34)  | 0.91 |
| 11-02 | Gp4 Focus 2 | g.chr5:76736707G>A   | Silent            | WDR41   | p.T271T  | WD repeat domain 41 21 (0.00)      | 17 (0.29)  | 0.78 |
| 11-02 | Gp4 Focus 2 | g.chr1:109524445C>G  | Missense Mutation | WDR47   | p.A771P  | WD repeat domain 47 53 (0.00)      | 44 (0.25)  | 0.52 |
| 11-02 | Gp4 Focus 2 | g.chr1:109544925G>C  | Missense Mutation | WDR47   | p.Q453E  | WD repeat domain 47 72 (0.00)      | 33 (0.18)  | 0.38 |
| 11-02 | Gp4 Focus 2 | g.chr3:113063522G>A  | Missense Mutation | WDR52   | p.H1035Y | 26 (0.00)                          | 27 (0.26)  | 0.69 |

|       |             |                     |                   |         |          |                           |            |            |      |
|-------|-------------|---------------------|-------------------|---------|----------|---------------------------|------------|------------|------|
| 11-02 | Gp4 Focus 2 | g.chr7:158663846G>A | Missense Mutation | WDR60   | p.G28D   | WD repeat domain 60       | 37 (0.00)  | 24 (0.38)  | 1.00 |
| 11-02 | Gp4 Focus 2 | g.chr1:43689744G>A  | Missense Mutation | WDR65   | p.E912K  |                           | 32 (0.00)  | 30 (0.17)  | 0.44 |
| 11-02 | Gp4 Focus 2 | g.chr18:54426129G>A | Silent            | WDR7    | p.K931K  | WD repeat domain 7        | 43 (0.00)  | 18 (0.61)  | 1.63 |
| 11-02 | Gp4 Focus 2 | g.chr11:62603254G>A | Silent            | WDR74   | p.P86P   | WD repeat domain 74       | 43 (0.00)  | 31 (0.32)  | 0.86 |
| 11-02 | Gp4 Focus 2 | g.chr8:38205600C>T  | Silent            | WHSC1L1 | p.Q30Q   | Wolf-Hirschhorn syndrc    | 17 (0.00)  | 14 (0.57)  | 1.85 |
| 11-02 | Gp4 Focus 2 | g.chr1:68624889G>A  | Missense Mutation | WLS     | p.R141C  | wntless Wnt ligand secr   | 68 (0.00)  | 22 (0.41)  | 1.09 |
| 11-02 | Gp4 Focus 2 | g.chr12:988949C>T   | Missense Mutation | WNK1    | p.P862S  | WNK lysine deficient p    | 97 (0.00)  | 109 (0.75) | 2.01 |
| 11-02 | Gp4 Focus 2 | g.chr17:40940171T>A | Silent            | WNK4    | p.R629R  | WNK lysine deficient p    | 47 (0.00)  | 14 (0.36)  | 0.95 |
| 11-02 | Gp4 Focus 2 | g.chr3:55504215C>T  | Missense Mutation | WNT5A   | p.V350M  | wingless-type MMTV ir     | 76 (0.00)  | 19 (0.42)  | 1.12 |
| 11-02 | Gp4 Focus 2 | g.chr1:3552582C>T   | Missense Mutation | WRAP73  | p.D177N  | WD repeat containing, a   | 15 (0.00)  | 18 (0.67)  | 1.78 |
| 11-02 | Gp4 Focus 2 | g.chr17:25636220C>T | Missense Mutation | WSB1    | p.A269V  | WD repeat and SOCS b      | 113 (0.00) | 20 (0.50)  | 1.33 |
| 11-02 | Gp4 Focus 2 | g.chr4:184166601G>A | Missense Mutation | WWC2    | p.G212E  | WW and C2 domain cor      | 40 (0.00)  | 20 (0.25)  | 0.67 |
| 11-02 | Gp4 Focus 2 | g.chr4:184203996C>T | Silent            | WWC2    | p.N940N  | WW and C2 domain cor      | 84 (0.00)  | 36 (0.22)  | 0.59 |
| 11-02 | Gp4 Focus 2 | g.chrX:10090744C>T  | Silent            | WWC3    | p.A572A  | WWC family member 3       | 21 (0.00)  | 29 (0.24)  | 0.49 |
| 11-02 | Gp4 Focus 2 | g.chr16:69833191G>A | Silent            | WWP2    | p.G111G  | WW domain containing      | 15 (0.00)  | 22 (0.23)  | 0.61 |
| 11-02 | Gp4 Focus 2 | g.chr3:39229568C>T  | Missense Mutation | XIRP1   | p.E457K  | xin actin-binding repeat  | 31 (0.00)  | 19 (0.74)  | 1.96 |
| 11-02 | Gp4 Focus 2 | g.chr1:28293695C>T  | Missense Mutation | XKR8    | p.S391L  | XK, Kell blood group c    | 17 (0.00)  | 19 (0.26)  | 0.70 |
| 11-02 | Gp4 Focus 2 | g.chr3:14200265G>A  | Missense Mutation | XPC     | p.A373V  | xeroderma pigmentosun     | 22 (0.00)  | 30 (0.23)  | 0.62 |
| 11-02 | Gp4 Focus 2 | g.chr3:14219095G>A  | Intron            | XPC     |          | xeroderma pigmentosun     | 135 (0.00) | 69 (0.30)  | 0.81 |
| 11-02 | Gp4 Focus 2 | g.chr13:21395922C>T | Missense Mutation | XPO4    | p.S365N  | exportin 4                | 26 (0.00)  | 13 (0.38)  | 1.32 |
| 11-02 | Gp4 Focus 2 | g.chr6:43491658G>A  | Missense Mutation | XPO5    | p.T1188M | exportin 5                | 47 (0.00)  | 84 (0.37)  | 0.98 |
| 11-02 | Gp4 Focus 2 | g.chr6:43492257G>A  | Silent            | XPO5    | p.D1143D | exportin 5                | 48 (0.00)  | 61 (0.26)  | 0.70 |
| 11-02 | Gp4 Focus 2 | g.chr20:21349130G>A | Missense Mutation | XRN2    | p.G829D  | 5'-3' exoribonuclease 2   | 38 (0.00)  | 14 (0.57)  | 1.52 |
| 11-02 | Gp4 Focus 2 | g.chr11:74632390G>A | Silent            | XRRA1   | p.F167F  | X-ray radiation resistanc | 53 (0.00)  | 12 (0.50)  | 1.33 |
| 11-02 | Gp4 Focus 2 | g.chr3:194877276C>G | Silent            | XXYLT1  | p.L229L  | xyloside xylosyltransfer  | 37 (0.00)  | 32 (0.16)  | 0.42 |
| 11-02 | Gp4 Focus 2 | g.chr3:38415952G>A  | Splice Site       | XYLB    |          | xylulokinase homolog (l   | 17 (0.00)  | 32 (0.47)  | 1.25 |
| 11-02 | Gp4 Focus 2 | g.chr16:17221526G>A | Silent            | XYLT1   | p.S740S  | xylosyltransferase I      | 29 (0.00)  | 35 (0.83)  | 2.21 |
| 11-02 | Gp4 Focus 2 | g.chr1:33272090C>T  | Missense Mutation | YARS    | p.G168E  | tyrosyl-tRNA synthetas    | 30 (0.00)  | 34 (0.24)  | 0.63 |
| 11-02 | Gp4 Focus 2 | g.chr6:43480020G>A  | Missense Mutation | YIPF3   | p.P319L  | Yip1 domain family, m     | 38 (0.00)  | 57 (0.21)  | 0.56 |
| 11-02 | Gp4 Focus 2 | g.chr6:43480021G>A  | Missense Mutation | YIPF3   | p.P319S  | Yip1 domain family, m     | 38 (0.00)  | 57 (0.21)  | 0.56 |
| 11-02 | Gp4 Focus 2 | g.chr14:75248748C>A | Missense Mutation | YLPM1   | p.P668T  | YLP motif containing      | 181 (0.00) | 33 (0.15)  | 0.40 |
| 11-02 | Gp4 Focus 2 | g.chr22:22064957C>T | Missense Mutation | YPEL1   | p.C26Y   | yippee-like 1 (Drosophi   | 60 (0.00)  | 33 (0.15)  | 0.40 |
| 11-02 | Gp4 Focus 2 | g.chr1:29069986G>A  | Missense Mutation | YTHDF2  | p.D402N  | YTH domain family, m      | 25 (0.00)  | 26 (0.23)  | 0.62 |
| 11-02 | Gp4 Focus 2 | g.chr20:43530386C>T | Missense Mutation | YWHAB   | p.T71I   | tyrosine 3-monooxygen     | 82 (0.00)  | 35 (0.14)  | 0.38 |
| 11-02 | Gp4 Focus 2 | g.chr7:75959101G>A  | Silent            | YWHAG   | p.Y179Y  | tyrosine 3-monooxygen     | 22 (0.00)  | 39 (0.18)  | 0.78 |

|       |             |                      |                   |         |          |                          |              |           |      |
|-------|-------------|----------------------|-------------------|---------|----------|--------------------------|--------------|-----------|------|
| 11-02 | Gp4 Focus 2 | g.chr14:100728672G>A | Silent            | YY1     | p.V237V  | YY1 transcription factor | 27 (0.00)    | 41 (0.32) | 0.85 |
| 11-02 | Gp4 Focus 2 | g.chrX:21875541C>A   | Nonsense Mutation | YY2     | p.C313*  | YY2 transcription factor | 53 (0.00)    | 30 (0.27) | 0.44 |
| 11-02 | Gp4 Focus 2 | g.chr7:100350318C>T  | RNA               | ZAN     |          | zonadhesin (gene/pseud   | 49 (0.00)    | 37 (0.19) | 0.50 |
| 11-02 | Gp4 Focus 2 | g.chr7:100361499G>A  | RNA               | ZAN     |          | zonadhesin (gene/pseud   | 17 (0.00)    | 27 (0.48) | 1.28 |
| 11-02 | Gp4 Focus 2 | g.chr7:100364704G>T  | RNA               | ZAN     |          | zonadhesin (gene/pseud   | 21 (0.00)    | 21 (0.38) | 1.02 |
| 11-02 | Gp4 Focus 2 | g.chr7:150027663G>A  | Missense Mutation | ZBED6CL | p.C57Y   | ZBED6 C-terminal like    | 23 (0.00)    | 28 (0.21) | 0.57 |
| 11-02 | Gp4 Focus 2 | g.chr8:81412314G>A   | Missense Mutation | ZBTB10  | p.G520S  | zinc finger and BTB do   | 37 (0.00)    | 50 (0.14) | 0.47 |
| 11-02 | Gp4 Focus 2 | g.chr3:101384243C>T  | Silent            | ZBTB11  | p.L396L  | zinc finger and BTB do   | 52 (0.00)    | 33 (0.15) | 0.40 |
| 11-02 | Gp4 Focus 2 | g.chr6:151687837G>A  | Missense Mutation | ZBTB2   | p.P122S  | zinc finger and BTB do   | 20 (0.00)    | 30 (0.17) | 0.44 |
| 11-02 | Gp4 Focus 2 | g.chr3:114069212C>A  | Silent            | ZBTB20  | p.G498G  | zinc finger and BTB do   | 18 (0.00)    | 24 (0.29) | 0.78 |
| 11-02 | Gp4 Focus 2 | g.chr11:62520913G>A  | Missense Mutation | ZBTB3   | p.A125V  | zinc finger and BTB do   | 92 (0.00)    | 48 (0.19) | 0.50 |
| 11-02 | Gp4 Focus 2 | g.chr12:57398612G>A  | Silent            | ZBTB39  | p.C30C   | zinc finger and BTB do   | 51 (0.00)    | 78 (0.33) | 0.89 |
| 11-02 | Gp4 Focus 2 | g.chr1:22816852C>T   | Silent            | ZBTB40  | p.F137F  | zinc finger and BTB do   | 43 (0.00)    | 29 (0.21) | 0.55 |
| 11-02 | Gp4 Focus 2 | g.chrX:64709274G>A   | Missense Mutation | ZC3H12B | p.S198N  | zinc finger CCCH-type    | 54 (0.00)    | 37 (0.24) | 0.41 |
| 11-02 | Gp4 Focus 2 | g.chr13:46616338G>A  | Silent            | ZC3H13  | p.P100P  | zinc finger CCCH-type    | 18 (0.00)    | 16 (0.50) | 1.33 |
| 11-02 | Gp4 Focus 2 | g.chr2:113069485G>A  | Missense Mutation | ZC3H6   | p.V240M  | zinc finger CCCH-type    | 99 (0.00)    | 18 (0.50) | 1.33 |
| 11-02 | Gp4 Focus 2 | g.chrX:117959554C>G  | Missense Mutation | ZCCHC12 | p.A116G  | zinc finger, CCHC dom    | 28 (0.00)    | 19 (0.32) | 0.70 |
| 11-02 | Gp4 Focus 2 | g.chr18:60242154G>A  | Missense Mutation | ZCCHC2  | p.S947N  | zinc finger, CCHC dom    | 101 (0.00)   | 33 (0.21) | 0.57 |
| 11-02 | Gp4 Focus 2 | g.chr9:37126846G>A   | Missense Mutation | ZCCHC7  | p.V173M  | zinc finger, CCHC dom    | 79 (0.00)    | 56 (0.32) | 0.86 |
| 11-02 | Gp4 Focus 2 | g.chr12:122958402T>A | Missense Mutation | ZCCHC8  | p.K351M  | zinc finger, CCHC dom    | 25 (0.00)    | 30 (0.23) | 0.62 |
| 11-02 | Gp4 Focus 2 | g.chr7:100013690C>T  | Missense Mutation | ZCWPW1  | p.G100E  | zinc finger, CW type     | wi 21 (0.00) | 27 (0.22) | 0.59 |
| 11-02 | Gp4 Focus 2 | g.chr10:99212651G>A  | Splice Site       | ZDHHC16 |          | zinc finger, DHHC-type   | 78 (0.00)    | 55 (0.25) | 0.68 |
| 11-02 | Gp4 Focus 2 | g.chr12:77222233C>T  | Silent            | ZDHHC17 | p.F368F  | zinc finger, DHHC-type   | 59 (0.00)    | 19 (0.26) | 0.70 |
| 11-02 | Gp4 Focus 2 | g.chr14:77600091G>A  | Silent            | ZDHHC22 | p.L243L  | zinc finger, DHHC-type   | 39 (0.00)    | 46 (0.41) | 1.10 |
| 11-02 | Gp4 Focus 2 | g.chr22:20126767G>A  | Missense Mutation | ZDHHC8  | p.G52D   | zinc finger, DHHC-type   | 20 (0.00)    | 11 (0.55) | 1.45 |
| 11-02 | Gp4 Focus 2 | g.chr2:145161539C>A  | Missense Mutation | ZEB2    | p.A251S  | zinc finger E-box bindi  | 56 (0.00)    | 28 (0.21) | 0.70 |
| 11-02 | Gp4 Focus 2 | g.chr2:220072720C>T  | Missense Mutation | ZFAND2B | p.H132Y  | zinc finger, AN1-type    | d 31 (0.00)  | 37 (0.43) | 1.15 |
| 11-02 | Gp4 Focus 2 | g.chr12:72036258C>T  | Missense Mutation | ZFC3H1  | p.E529K  | zinc finger, C3H1-type   | 40 (0.00)    | 15 (0.33) | 0.89 |
| 11-02 | Gp4 Focus 2 | g.chr12:72057187T>A  | Silent            | ZFC3H1  | p.G68G   | zinc finger, C3H1-type   | 17 (0.00)    | 18 (0.39) | 1.04 |
| 11-02 | Gp4 Focus 2 | g.chr16:72831570C>T  | Missense Mutation | ZFHX3   | p.A1671T | zinc finger homeobox     | 3 24 (0.00)  | 29 (0.28) | 0.74 |
| 11-02 | Gp4 Focus 2 | g.chr8:77767203C>T   | Silent            | ZFHX4   | p.A2682A | zinc finger homeobox     | 4 25 (0.00)  | 17 (0.29) | 0.99 |
| 11-02 | Gp4 Focus 2 | g.chr8:106811146G>A  | Missense Mutation | ZFPM2   | p.A312T  | zinc finger protein, FOC | 83 (0.00)    | 50 (0.46) | 1.57 |
| 11-02 | Gp4 Focus 2 | g.chr14:68244848G>A  | Silent            | ZFYVE26 | p.L1598L | zinc finger, FYVE dom    | 118 (0.00)   | 29 (0.17) | 0.46 |
| 11-02 | Gp4 Focus 2 | g.chr20:39831800G>A  | Missense Mutation | ZHX3    | p.T586I  | zinc fingers and homeo   | 20 (0.00)    | 32 (0.16) | 0.42 |
| 11-02 | Gp4 Focus 2 | g.chr8:40532348G>A   | Missense Mutation | ZMAT4   | p.A151V  | zinc finger, matrin-type | 28 (0.00)    | 22 (0.41) | 1.32 |

|       |             |                      |                   |         |          |                          |            |           |      |
|-------|-------------|----------------------|-------------------|---------|----------|--------------------------|------------|-----------|------|
| 11-02 | Gp4 Focus 2 | g.chr1:35884096G>A   | Silent            | ZMYM4   | p.V1454V | zinc finger, MYM-type    | 33 (0.00)  | 24 (0.21) | 0.56 |
| 11-02 | Gp4 Focus 2 | g.chr17:11886711A>T  | Missense Mutation | ZNF18   | p.H255Q  | zinc finger protein 18   | 37 (0.00)  | 30 (0.20) | 0.53 |
| 11-02 | Gp4 Focus 2 | g.chr3:44670988G>A   | Silent            | ZNF197  | p.V114V  | zinc finger protein 197  | 26 (0.00)  | 24 (0.25) | 0.67 |
| 11-02 | Gp4 Focus 2 | g.chr16:3273905C>T   | Missense Mutation | ZNF200  | p.R392Q  | zinc finger protein 200  | 56 (0.00)  | 55 (0.56) | 1.80 |
| 11-02 | Gp4 Focus 2 | g.chr11:123597360C>G | Missense Mutation | ZNF202  | p.G431A  | zinc finger protein 202  | 40 (0.00)  | 20 (0.45) | 1.20 |
| 11-02 | Gp4 Focus 2 | g.chr20:52198570G>A  | Silent            | ZNF217  | p.L266L  | zinc finger protein 217  | 58 (0.00)  | 28 (0.29) | 0.76 |
| 11-02 | Gp4 Focus 2 | g.chr19:44469123G>A  | Missense Mutation | ZNF221  | p.V35M   | zinc finger protein 221  | 134 (0.00) | 43 (0.28) | 0.74 |
| 11-02 | Gp4 Focus 2 | g.chr19:44471326G>A  | Missense Mutation | ZNF221  | p.G558R  | zinc finger protein 221  | 36 (0.00)  | 29 (0.31) | 0.83 |
| 11-02 | Gp4 Focus 2 | g.chr19:44564681G>A  | Missense Mutation | ZNF223  | p.R140K  | zinc finger protein 223  | 29 (0.00)  | 15 (0.33) | 0.89 |
| 11-02 | Gp4 Focus 2 | g.chr19:44564926C>T  | Missense Mutation | ZNF223  | p.T166I  | zinc finger protein 223  | 20 (0.00)  | 29 (0.45) | 1.20 |
| 11-02 | Gp4 Focus 2 | g.chr19:44611602G>A  | Missense Mutation | ZNF224  | p.C430Y  | zinc finger protein 224  | 20 (0.00)  | 13 (0.38) | 1.03 |
| 11-02 | Gp4 Focus 2 | g.chr17:5012276C>T   | Silent            | ZNF232  | p.Q190Q  | zinc finger protein 232  | 40 (0.00)  | 24 (0.38) | 1.00 |
| 11-02 | Gp4 Focus 2 | g.chr19:44803038G>A  | Missense Mutation | ZNF235  | p.P54L   | zinc finger protein 235  | 31 (0.00)  | 27 (0.19) | 0.49 |
| 11-02 | Gp4 Focus 2 | g.chr18:74593413G>A  | Silent            | ZNF236  | p.E452E  | zinc finger protein 236  | 50 (0.00)  | 21 (0.24) | 0.76 |
| 11-02 | Gp4 Focus 2 | g.chr18:74639088G>A  | Missense Mutation | ZNF236  | p.V1373I | zinc finger protein 236  | 74 (0.00)  | 24 (0.38) | 1.20 |
| 11-02 | Gp4 Focus 2 | g.chr19:22255621C>T  | Missense Mutation | ZNF257  | p.T5I    | zinc finger protein 257  | 62 (0.00)  | 32 (0.25) | 0.67 |
| 11-02 | Gp4 Focus 2 | g.chr11:116650494G>A | Silent            | ZNF259  | p.Y413Y  |                          | 32 (0.00)  | 19 (0.26) | 0.70 |
| 11-02 | Gp4 Focus 2 | g.chr19:44590944G>A  | Missense Mutation | ZNF284  | p.S438N  | zinc finger protein 284  | 51 (0.00)  | 80 (0.40) | 1.07 |
| 11-02 | Gp4 Focus 2 | g.chr19:57869201C>T  | Missense Mutation | ZNF304  | p.S655F  | zinc finger protein 304  | 67 (0.00)  | 34 (0.21) | 0.55 |
| 11-02 | Gp4 Focus 2 | g.chr6:43322830C>T   | Missense Mutation | ZNF318  | p.A748T  | zinc finger protein 318  | 30 (0.00)  | 12 (0.50) | 1.33 |
| 11-02 | Gp4 Focus 2 | g.chr4:142154891G>A  | Silent            | ZNF330  | p.R237R  | zinc finger protein 330  | 72 (0.00)  | 52 (0.19) | 0.88 |
| 11-02 | Gp4 Focus 2 | g.chr4:142154919G>A  | Missense Mutation | ZNF330  | p.A247T  | zinc finger protein 330  | 72 (0.00)  | 52 (0.21) | 0.97 |
| 11-02 | Gp4 Focus 2 | g.chr19:54080166C>T  | Missense Mutation | ZNF331  | p.P118S  | zinc finger protein 331  | 23 (0.00)  | 34 (0.29) | 0.78 |
| 11-02 | Gp4 Focus 2 | g.chr19:54080268A>G  | Missense Mutation | ZNF331  | p.I152V  | zinc finger protein 331  | 43 (0.00)  | 31 (0.65) | 1.72 |
| 11-02 | Gp4 Focus 2 | g.chr20:32354826G>A  | Missense Mutation | ZNF341  | p.M457I  | zinc finger protein 341  | 22 (0.00)  | 19 (0.26) | 0.70 |
| 11-02 | Gp4 Focus 2 | g.chr5:178154088G>A  | Silent            | ZNF354A | p.T24T   | zinc finger protein 354A | 31 (0.00)  | 31 (0.16) | 0.43 |
| 11-02 | Gp4 Focus 2 | g.chr1:33747312C>T   | Silent            | ZNF362  | p.L270L  | zinc finger protein 362  | 20 (0.00)  | 15 (0.60) | 1.60 |
| 11-02 | Gp4 Focus 2 | g.chr2:180311360G>A  | Missense Mutation | ZNF385B | p.P270S  | zinc finger protein 385B | 36 (0.00)  | 12 (0.50) | 1.33 |
| 11-02 | Gp4 Focus 2 | g.chr18:72344329G>A  | Missense Mutation | ZNF407  | p.G452S  | zinc finger protein 407  | 134 (0.00) | 68 (0.25) | 0.80 |
| 11-02 | Gp4 Focus 2 | g.chr18:72344721G>A  | Silent            | ZNF407  | p.Q582Q  | zinc finger protein 407  | 140 (0.00) | 79 (0.37) | 1.18 |
| 11-02 | Gp4 Focus 2 | g.chr18:72345995C>A  | Missense Mutation | ZNF407  | p.S1007Y | zinc finger protein 407  | 72 (0.00)  | 73 (0.25) | 0.79 |
| 11-02 | Gp4 Focus 2 | g.chr19:9645917C>T   | Missense Mutation | ZNF426  | p.E22K   | zinc finger protein 426  | 90 (0.00)  | 54 (0.22) | 0.59 |
| 11-02 | Gp4 Focus 2 | g.chr10:31138775C>T  | Missense Mutation | ZNF438  | p.A187T  | zinc finger protein 438  | 41 (0.00)  | 26 (0.19) | 0.64 |
| 11-02 | Gp4 Focus 2 | g.chr10:31138810G>T  | Missense Mutation | ZNF438  | p.P175Q  | zinc finger protein 438  | 36 (0.00)  | 45 (0.18) | 0.60 |
| 11-02 | Gp4 Focus 2 | g.chr19:11977038G>A  | Missense Mutation | ZNF439  | p.D23N   | zinc finger protein 439  | 52 (0.00)  | 34 (0.18) | 0.47 |



|       |             |                     |                   |         |          |                          |            |           |      |
|-------|-------------|---------------------|-------------------|---------|----------|--------------------------|------------|-----------|------|
| 11-02 | Gp4 Focus 2 | g.chr9:109688408G>T | Missense Mutation | ZNF462  | p.D739Y  | zinc finger protein 462  | 50 (0.02)  | 36 (0.22) | 0.59 |
| 11-02 | Gp4 Focus 2 | g.chr5:121488693G>A | Silent            | ZNF474  | p.R336R  | zinc finger protein 474  | 40 (0.03)  | 29 (0.24) | 0.64 |
| 11-02 | Gp4 Focus 2 | g.chr9:114304274C>T | Silent            | ZNF483  | p.T353T  | zinc finger protein 483  | 30 (0.00)  | 33 (0.18) | 0.48 |
| 11-02 | Gp4 Focus 2 | g.chr2:27600773G>A  | Missense Mutation | ZNF513  | p.P422L  | zinc finger protein 513  | 19 (0.00)  | 20 (0.25) | 0.67 |
| 11-02 | Gp4 Focus 2 | g.chr2:27600975G>A  | Missense Mutation | ZNF513  | p.P355S  | zinc finger protein 513  | 15 (0.00)  | 40 (0.30) | 0.80 |
| 11-02 | Gp4 Focus 2 | g.chr18:74092081C>T | Silent            | ZNF516  | p.R663R  | zinc finger protein 516  | 16 (0.00)  | 14 (0.36) | 1.14 |
| 11-02 | Gp4 Focus 2 | g.chr4:10447907C>T  | Missense Mutation | ZNF518B | p.G16R   | zinc finger protein 518B | 104 (0.01) | 54 (0.15) | 0.40 |
| 11-02 | Gp4 Focus 2 | g.chr19:58774050G>A | Missense Mutation | ZNF544  | p.C693Y  | zinc finger protein 544  | 74 (0.00)  | 95 (0.15) | 0.39 |
| 11-02 | Gp4 Focus 2 | g.chr19:42582774G>A | Missense Mutation | ZNF574  | p.E6K    | zinc finger protein 574  | 63 (0.00)  | 73 (0.26) | 0.69 |
| 11-02 | Gp4 Focus 2 | g.chr19:42583287G>A | Missense Mutation | ZNF574  | p.V177M  | zinc finger protein 574  | 15 (0.00)  | 32 (0.22) | 0.58 |
| 11-02 | Gp4 Focus 2 | g.chr19:52376126C>T | Missense Mutation | ZNF577  | p.E373K  | zinc finger protein 577  | 45 (0.00)  | 15 (0.33) | 0.89 |
| 11-02 | Gp4 Focus 2 | g.chr19:52447744C>T | Missense Mutation | ZNF613  | p.P203L  | zinc finger protein 613  | 24 (0.00)  | 39 (0.18) | 0.48 |
| 11-02 | Gp4 Focus 2 | g.chr19:52447907G>A | Silent            | ZNF613  | p.E257E  | zinc finger protein 613  | 36 (0.00)  | 23 (0.30) | 0.81 |
| 11-02 | Gp4 Focus 2 | g.chr19:52505456G>A | Silent            | ZNF615  | p.L32L   | zinc finger protein 615  | 94 (0.00)  | 45 (0.16) | 0.41 |
| 11-02 | Gp4 Focus 2 | g.chr9:116811542C>T | Nonsense Mutation | ZNF618  | p.Q654*  | zinc finger protein 618  | 19 (0.00)  | 15 (0.40) | 1.07 |
| 11-02 | Gp4 Focus 2 | g.chr3:40529291C>T  | Silent            | ZNF619  | p.C470C  | zinc finger protein 619  | 21 (0.00)  | 25 (0.24) | 0.64 |
| 11-02 | Gp4 Focus 2 | g.chr8:144733328G>A | Missense Mutation | ZNF623  | p.R429K  | zinc finger protein 623  | 45 (0.00)  | 20 (0.45) | 1.20 |
| 11-02 | Gp4 Focus 2 | g.chr2:71650818C>T  | Missense Mutation | ZNF638  | p.P1392S | zinc finger protein 638  | 48 (0.00)  | 13 (0.54) | 1.44 |
| 11-02 | Gp4 Focus 2 | g.chr16:31089865G>A | Silent            | ZNF646  | p.G740G  | zinc finger protein 646  | 15 (0.00)  | 43 (0.30) | 0.81 |
| 11-02 | Gp4 Focus 2 | g.chr16:31090709G>T | Missense Mutation | ZNF646  | p.A1022S | zinc finger protein 646  | 15 (0.00)  | 25 (0.20) | 0.53 |
| 11-02 | Gp4 Focus 2 | g.chr1:151259920G>A | Missense Mutation | ZNF687  | p.V385M  | zinc finger protein 687  | 19 (0.00)  | 15 (0.40) | 1.07 |
| 11-02 | Gp4 Focus 2 | g.chr19:12015698G>A | Silent            | ZNF69   | p.K162K  | zinc finger protein 69   | 43 (0.00)  | 20 (0.60) | 1.60 |
| 11-02 | Gp4 Focus 2 | g.chr19:2934250C>T  | Missense Mutation | ZNF77   | p.G292E  | zinc finger protein 77   | 30 (0.00)  | 10 (0.50) | 1.33 |
| 11-02 | Gp4 Focus 2 | g.chr9:99607218C>T  | Silent            | ZNF782  | p.L32L   | zinc finger protein 782  | 34 (0.00)  | 28 (0.79) | 2.10 |
| 11-02 | Gp4 Focus 2 | g.chr7:148963471C>T | Missense Mutation | ZNF783  | p.P24S   | zinc finger family memt  | 15 (0.00)  | 24 (0.29) | 0.78 |
| 11-02 | Gp4 Focus 2 | g.chr9:130207431C>G | Missense Mutation | ZNF79   | p.C484W  | zinc finger protein 79   | 38 (0.00)  | 35 (0.17) | 0.46 |
| 11-02 | Gp4 Focus 2 | g.chr19:58797122C>T | Nonsense Mutation | ZNF8    | p.Q36*   | zinc finger protein 8    | 49 (0.02)  | 30 (0.17) | 0.44 |
| 11-02 | Gp4 Focus 2 | g.chr19:53058172G>A | Nonsense Mutation | ZNF808  | p.W668*  | zinc finger protein 808  | 50 (0.00)  | 27 (0.33) | 0.89 |
| 11-02 | Gp4 Focus 2 | g.chr19:11776987C>T | lincRNA           | ZNF833P |          | zinc finger protein 833, | 60 (0.00)  | 35 (0.20) | 0.53 |
| 11-02 | Gp4 Focus 2 | g.chr20:47887048G>A | Missense Mutation | ZNFX1   | p.T434I  | zinc finger, NFX1-type   | 56 (0.00)  | 40 (0.23) | 0.60 |
| 11-02 | Gp4 Focus 2 | g.chr3:102196320C>T | Missense Mutation | ZPLD1   | p.A369V  | zona pellucida-like dom  | 73 (0.00)  | 67 (0.24) | 0.64 |
| 11-02 | Gp4 Focus 2 | g.chr16:3141547G>A  | Missense Mutation | ZSCAN10 | p.P206S  | zinc finger and SCAN d   | 18 (0.00)  | 53 (0.49) | 1.57 |
| 11-02 | Gp4 Focus 2 | g.chr15:85147168G>A | Missense Mutation | ZSCAN2  | p.A4T    | zinc finger and SCAN d   | 18 (0.00)  | 37 (0.32) | 0.86 |
| 11-02 | Gp4 Focus 2 | g.chr7:99654653G>A  | Missense Mutation | ZSCAN21 | p.M8I    | zinc finger and SCAN d   | 25 (0.00)  | 24 (0.58) | 1.56 |
| 11-02 | Gp4 Focus 2 | g.chr15:43656193G>A | Missense Mutation | ZSCAN29 | p.S537F  | zinc finger and SCAN d   | 57 (0.00)  | 55 (0.15) | 0.39 |

|       |             |                      |                   |            |          |                                     |            |      |
|-------|-------------|----------------------|-------------------|------------|----------|-------------------------------------|------------|------|
| 11-02 | Gp4 Focus 2 | g.chr15:43661189C>T  | Missense Mutation | ZSCAN29    | p.R152K  | zinc finger and SCAN d 74 (0.00)    | 21 (0.33)  | 0.89 |
| 11-02 | Gp4 Focus 2 | g.chr20:44505851A>G  | Silent            | ZSWIM3     | p.P218P  | zinc finger, SWIM-type 18 (0.00)    | 18 (0.44)  | 1.19 |
| 11-02 | Gp4 Focus 2 | g.chr1:45484486C>T   | Silent            | ZSWIM5     | p.K1066K | zinc finger, SWIM-type 20 (0.00)    | 22 (0.23)  | 0.61 |
| 11-02 | Gp4 Focus 2 | g.chr1:45486362C>T   | Missense Mutation | ZSWIM5     | p.A850T  | zinc finger, SWIM-type 68 (0.00)    | 34 (0.24)  | 0.63 |
| 11-02 | Gp4 Focus 2 | g.chr1:45508891C>T   | Splice Site       | ZSWIM5     | p.E537K  | zinc finger, SWIM-type 57 (0.00)    | 36 (0.25)  | 0.67 |
| 11-02 | Gp4 Focus 2 | g.chr10:75548564G>A  | Silent            | ZSWIM8     | p.E115E  | zinc finger, SWIM-type 19 (0.00)    | 43 (0.44)  | 1.18 |
| 11-02 | Gp4 Focus 2 | g.chr10:75560478G>A  | Missense Mutation | ZSWIM8     | p.D1698N | zinc finger, SWIM-type 48 (0.00)    | 14 (0.50)  | 1.33 |
| 11-02 | Gp4 Focus 2 | g.chr10:58118598C>T  | Silent            | ZWINT      | p.Q197Q  | ZW10 interacting kinetc 30 (0.00)   | 69 (0.22)  | 0.58 |
| 11-02 | Gp4 Focus 2 | g.chr17:3969771C>T   | Missense Mutation | ZZEF1      | p.E1407K | zinc finger, ZZ-type wit 113 (0.01) | 27 (0.33)  | 0.89 |
| 11-03 | Gp3         | g.chr12:125587321C>T | Silent            | AACS       | p.L223L  | acetoacetyl-CoA synthe 132 (0.00)   | 128 (0.23) | 0.60 |
| 11-03 | Gp3         | g.chr3:151535345C>T  | Silent            | AADAC      | p.I110I  | arylacetamide deacetyla 27 (0.00)   | 27 (0.19)  | 0.49 |
| 11-03 | Gp3         | g.chr17:41113260G>T  | Missense Mutation | AARSD1     | p.L94M   | alanyl-tRNA synthetase 63 (0.00)    | 113 (0.16) | 0.42 |
| 11-03 | Gp3         | g.chr9:107576423G>T  | Missense Mutation | ABCA1      | p.P1293T | ATP-binding cassette, s1 16 (0.00)  | 25 (0.48)  | 1.28 |
| 11-03 | Gp3         | g.chr7:48375020C>A   | Splice Site       | ABCA13     | p.A3334D | ATP-binding cassette, s1 19 (0.00)  | 20 (0.35)  | 0.93 |
| 11-03 | Gp3         | g.chr1:94502310C>G   | Missense Mutation | ABCA4      | p.G1283A | ATP-binding cassette, s1 31 (0.00)  | 103 (0.15) | 0.39 |
| 11-03 | Gp3         | g.chr2:169792804G>T  | Missense Mutation | ABCB11     | p.T917K  | ATP-binding cassette, s1 41 (0.00)  | 46 (0.17)  | 0.46 |
| 11-03 | Gp3         | g.chr16:48204022G>T  | Missense Mutation | ABCC11     | p.N1295K | ATP-binding cassette, s1 32 (0.00)  | 52 (0.19)  | 0.51 |
| 11-03 | Gp3         | g.chr16:48139075G>T  | Missense Mutation | ABCC12     | p.S883Y  | ATP-binding cassette, s1 31 (0.00)  | 28 (0.18)  | 0.48 |
| 11-03 | Gp3         | g.chr12:22069875A>T  | Missense Mutation | ABCC9      | p.V190D  | ATP-binding cassette, s1 47 (0.00)  | 25 (0.32)  | 0.85 |
| 11-03 | Gp3         | g.chr3:111710380C>A  | Missense Mutation | ABHD10     | p.H245N  | abhydrolase domain con 22 (0.00)    | 33 (0.18)  | 0.48 |
| 11-03 | Gp3         | g.chr9:74485050C>T   | Missense Mutation | ABHD17B    | p.R199Q  | abhydrolase domain con 17 (0.00)    | 26 (0.46)  | 1.23 |
| 11-03 | Gp3         | g.chr10:116225491G>A | Silent            | ABLIM1     | p.T469T  | actin binding LIM prote 25 (0.00)   | 46 (0.15)  | 0.41 |
| 11-03 | Gp3         | g.chr3:15175899C>A   | RNA               | AC090954.1 |          | 216 (0.00)                          | 146 (0.21) | 0.55 |
| 11-03 | Gp3         | g.chr2:239141006C>A  | RNA               | AC096574.4 |          | 31 (0.00)                           | 40 (0.20)  | 0.53 |
| 11-03 | Gp3         | g.chr2:208687173C>T  | lincRNA           | AC096772.6 |          | 26 (0.00)                           | 28 (0.18)  | 0.48 |
| 11-03 | Gp3         | g.chr17:35487078C>G  | Missense Mutation | ACACA      | p.G1879R | acetyl-CoA carboxylase 37 (0.00)    | 37 (0.16)  | 0.43 |
| 11-03 | Gp3         | g.chr17:35487087G>C  | Missense Mutation | ACACA      | p.H1876D | acetyl-CoA carboxylase 39 (0.00)    | 36 (0.19)  | 0.52 |
| 11-03 | Gp3         | g.chr17:35609859T>A  | Nonsense Mutation | ACACA      | p.R607*  | acetyl-CoA carboxylase 58 (0.00)    | 64 (0.28)  | 0.75 |
| 11-03 | Gp3         | g.chr15:89401416G>A  | Missense Mutation | ACAN       | p.G1867D | aggrecan 30 (0.00)                  | 22 (0.32)  | 0.85 |
| 11-03 | Gp3         | g.chr11:44080222G>T  | Missense Mutation | ACCSL      | p.A533S  | 1-aminocyclopropane-1- 17 (0.00)    | 34 (0.24)  | 0.63 |
| 11-03 | Gp3         | g.chr16:89178533C>T  | Missense Mutation | ACSF3      | p.R21W   | acyl-CoA synthetase far 50 (0.02)   | 39 (0.28)  | 0.75 |
| 11-03 | Gp3         | g.chr4:185681649G>T  | Silent            | ACSL1      | p.G548G  | acyl-CoA synthetase lor 116 (0.00)  | 68 (0.16)  | 0.43 |
| 11-03 | Gp3         | g.chr20:24988446G>A  | Silent            | ACSS1      | p.I674I  | acyl-CoA synthetase shc 27 (0.00)   | 31 (0.16)  | 0.43 |
| 11-03 | Gp3         | g.chr1:236924429G>A  | Missense Mutation | ACTN2      | p.A828T  | actinin, alpha 2 18 (0.00)          | 27 (0.33)  | 0.89 |
| 11-03 | Gp3         | g.chr11:67410231C>T  | Missense Mutation | ACY3       | p.M187I  | aspartoacylase (aminocy 18 (0.00)   | 32 (0.38)  | 1.00 |

|       |     |                      |                   |          |          |                                      |           |      |
|-------|-----|----------------------|-------------------|----------|----------|--------------------------------------|-----------|------|
| 11-03 | Gp3 | g.chr10:127737878C>T | Missense Mutation | ADAM12   | p.D624N  | ADAM metallopeptidas 64 (0.02)       | 43 (0.16) | 0.43 |
| 11-03 | Gp3 | g.chr2:207424774G>C  | Missense Mutation | ADAM23   | p.Q367H  | ADAM metallopeptidas 19 (0.00)       | 15 (0.40) | 1.07 |
| 11-03 | Gp3 | g.chr8:39111939G>A   | Missense Mutation | ADAM32   | p.D637N  | ADAM metallopeptidas 19 (0.00)       | 45 (0.18) | 0.47 |
| 11-03 | Gp3 | g.chr3:64640269G>T   | Missense Mutation | ADAMTS9  | p.H397N  | ADAM metallopeptidas 73 (0.00)       | 45 (0.20) | 0.53 |
| 11-03 | Gp3 | g.chr7:45724621G>A   | Missense Mutation | ADCY1    | p.C676Y  | adenylate cyclase 1 (bra 65 (0.00)   | 16 (0.31) | 0.83 |
| 11-03 | Gp3 | g.chr12:49167329G>A  | Silent            | ADCY6    | p.I848I  | adenylate cyclase 6 30 (0.00)        | 24 (0.21) | 0.56 |
| 11-03 | Gp3 | g.chr8:132002753G>A  | Silent            | ADCY8    | p.N332N  | adenylate cyclase 8 (bra 43 (0.00)   | 43 (0.19) | 0.50 |
| 11-03 | Gp3 | g.chr8:67361144C>A   | Missense Mutation | ADHFE1   | p.P225T  | alcohol dehydrogenase, 55 (0.00)     | 50 (0.22) | 0.59 |
| 11-03 | Gp3 | g.chr4:87968029C>G   | Missense Mutation | AFF1     | p.F107L  | AF4/FMR2 family, men36 (0.00)        | 21 (0.29) | 0.76 |
| 11-03 | Gp3 | g.chr2:100185376G>A  | Splice Site       | AFF3     | p.P974S  | AF4/FMR2 family, men21 (0.00)        | 20 (0.30) | 0.80 |
| 11-03 | Gp3 | g.chr2:100209939G>T  | Silent            | AFF3     | p.A728A  | AF4/FMR2 family, men15 (0.00)        | 35 (0.14) | 0.38 |
| 11-03 | Gp3 | g.chr4:74364911C>T   | Missense Mutation | AFM      | p.A457V  | afamin 29 (0.00)                     | 63 (0.14) | 0.38 |
| 11-03 | Gp3 | g.chr4:84511383G>A   | Missense Mutation | AGPAT9   | p.V226I  | 1-acylglycerol-3-phosph 24 (0.00)    | 25 (0.24) | 0.64 |
| 11-03 | Gp3 | g.chr1:65691794C>A   | Silent            | AK4      | p.I202I  | adenylate kinase 4 28 (0.00)         | 23 (0.35) | 0.93 |
| 11-03 | Gp3 | g.chr10:5204913G>A   | Missense Mutation | AKR1CL1  | p.A55V   | aldo-keto reductase fam 23 (0.00)    | 42 (0.14) | 0.38 |
| 11-03 | Gp3 | g.chr10:4872962G>A   | Silent            | AKR1E2   | p.E45E   | aldo-keto reductase fam 32 (0.00)    | 39 (0.21) | 0.55 |
| 11-03 | Gp3 | g.chr16:53532348G>A  | Missense Mutation | AKTIP    | p.A68V   | AKT interacting protein 45 (0.00)    | 21 (0.24) | 0.63 |
| 11-03 | Gp3 | g.chr17:19554983G>T  | Missense Mutation | ALDH3A2  | p.D93Y   | aldehyde dehydrogenase 28 (0.00)     | 49 (0.18) | 0.49 |
| 11-03 | Gp3 | g.chr2:29449941C>T   | Splice Site       | ALK      |          | anaplastic lymphoma re 58 (0.00)     | 42 (0.21) | 0.57 |
| 11-03 | Gp3 | g.chr2:73676993G>C   | Missense Mutation | ALMS1    | p.E1112D | Alstrom syndrome 1 23 (0.04)         | 42 (0.19) | 0.51 |
| 11-03 | Gp3 | g.chr4:113353699C>A  | Missense Mutation | ALPK1    | p.T999K  | alpha-kinase 1 68 (0.00)             | 18 (0.28) | 0.74 |
| 11-03 | Gp3 | g.chr18:56247690G>A  | Silent            | ALPK2    | p.C106C  | alpha-kinase 2 36 (0.00)             | 52 (0.31) | 0.82 |
| 11-03 | Gp3 | g.chr7:91972443C>A   | Missense Mutation | ANKIB1   | p.A298D  | ankyrin repeat and IBR 73 (0.00)     | 32 (0.25) | 0.67 |
| 11-03 | Gp3 | g.chr12:133331575G>A | Missense Mutation | ANKLE2   | p.A109V  | ankyrin repeat and LEM53 (0.00)      | 30 (0.17) | 0.44 |
| 11-03 | Gp3 | g.chr12:110457078C>T | Missense Mutation | ANKRD13A | p.L227F  | ankyrin repeat domain 162 (0.00)     | 60 (0.25) | 0.67 |
| 11-03 | Gp3 | g.chr4:73964232G>T   | Missense Mutation | ANKRD17  | p.P1527T | ankyrin repeat domain 135 (0.00)     | 28 (0.21) | 0.57 |
| 11-03 | Gp3 | g.chr2:97911323G>A   | Missense Mutation | ANKRD36  | p.E1667K | ankyrin repeat domain 3100 (0.00)    | 67 (0.45) | 1.19 |
| 11-03 | Gp3 | g.chr7:36450211C>T   | Silent            | ANLN     | p.H395H  | anillin, actin binding prc 33 (0.00) | 31 (0.26) | 0.69 |
| 11-03 | Gp3 | g.chr12:5941748C>G   | Missense Mutation | ANO2     | p.G216R  | anoctamin 2, calcium ac 17 (0.00)    | 21 (0.24) | 0.63 |
| 11-03 | Gp3 | g.chr19:16338436C>T  | Missense Mutation | AP1M1    | p.R251C  | adaptor-related protein c 22 (0.00)  | 24 (0.29) | 1.03 |
| 11-03 | Gp3 | g.chr19:47342802C>A  | Missense Mutation | AP2S1    | p.A63S   | adaptor-related protein c 50 (0.00)  | 40 (0.15) | 0.53 |
| 11-03 | Gp3 | g.chr10:75893807T>A  | Silent            | AP3M1    | p.I187I  | adaptor-related protein c 54 (0.00)  | 78 (0.19) | 0.51 |
| 11-03 | Gp3 | g.chr12:99053051C>A  | Missense Mutation | APAF1    | p.Q214K  | apoptotic peptidase activ 58 (0.00)  | 51 (0.16) | 0.42 |
| 11-03 | Gp3 | g.chr3:49719327C>T   | Silent            | APEH     | p.P510P  | acylaminoacyl-peptide l 36 (0.00)    | 22 (0.36) | 0.97 |
| 11-03 | Gp3 | g.chr1:156563674G>A  | Splice Site       | APOA1BP  | p.G222E  | apolipoprotein A-I bindi 43 (0.00)   | 24 (0.38) | 0.71 |

|       |     |                      |                   |           |          |                                   |            |           |      |
|-------|-----|----------------------|-------------------|-----------|----------|-----------------------------------|------------|-----------|------|
| 11-03 | Gp3 | g.chr6:131904595G>A  | Missense Mutation | ARG1      | p.E256K  | arginase 1                        | 37 (0.00)  | 27 (0.33) | 0.54 |
| 11-03 | Gp3 | g.chr15:30951048G>A  | Splice Site       | ARHGAP11B |          | Rho GTPase activating j19         | 19 (0.00)  | 30 (0.23) | 0.62 |
| 11-03 | Gp3 | g.chr16:24979672C>T  | Splice Site       | ARHGAP17  | p.R154K  | Rho GTPase activating j26         | 26 (0.00)  | 19 (0.26) | 0.70 |
| 11-03 | Gp3 | g.chr11:128868237T>A | Missense Mutation | ARHGAP32  | p.H28L   | Rho GTPase activating j87         | 87 (0.01)  | 45 (0.18) | 0.47 |
| 11-03 | Gp3 | g.chr3:153972549G>A  | Silent            | ARHGEF26  | p.K803K  | Rho guanine nucleotide 58         | 58 (0.02)  | 70 (0.14) | 0.38 |
| 11-03 | Gp3 | g.chr1:27094361G>T   | Missense Mutation | ARID1A    | p.W1023C | AT rich interactive dom 42        | 42 (0.00)  | 28 (0.18) | 0.48 |
| 11-03 | Gp3 | g.chr6:157150454C>T  | Missense Mutation | ARID1B    | p.P546S  | AT rich interactive dom 33        | 33 (0.00)  | 17 (0.29) | 0.78 |
| 11-03 | Gp3 | g.chr15:72874415G>T  | Splice Site       | ARIH1     |          | ariadne RBR E3 ubiquit 51         | 51 (0.02)  | 26 (0.23) | 0.62 |
| 11-03 | Gp3 | g.chr4:57389985C>A   | Silent            | ARL9      | p.P105P  | ADP-ribosylation factor 26        | 26 (0.00)  | 25 (0.28) | 0.75 |
| 11-03 | Gp3 | g.chr12:110873963C>T | Silent            | ARPC3     | p.L142L  | actin related protein 2/3 35      | 35 (0.00)  | 40 (0.20) | 0.53 |
| 11-03 | Gp3 | g.chr8:62465670C>A   | Nonsense Mutation | ASPH      | p.E516*  | aspartate beta-hydroxylase 48     | 48 (0.02)  | 24 (0.21) | 0.56 |
| 11-03 | Gp3 | g.chr20:30954250G>A  | Missense Mutation | ASXL1     | p.E41K   | additional sex combs lik 41       | 41 (0.00)  | 70 (0.14) | 0.38 |
| 11-03 | Gp3 | g.chr20:31020753G>C  | Missense Mutation | ASXL1     | p.W350C  | additional sex combs lik 27       | 27 (0.00)  | 31 (0.16) | 0.43 |
| 11-03 | Gp3 | g.chr11:46679138C>A  | Missense Mutation | ATG13     | p.P142T  | autophagy related 13              | 22 (0.00)  | 19 (0.26) | 0.70 |
| 11-03 | Gp3 | g.chr15:25932922G>A  | Silent            | ATP10A    | p.L1073L | ATPase, class V, type 10 42       | 42 (0.02)  | 43 (0.30) | 0.81 |
| 11-03 | Gp3 | g.chr15:25947134C>A  | Missense Mutation | ATP10A    | p.V897F  | ATPase, class V, type 10 21       | 21 (0.00)  | 14 (0.43) | 1.14 |
| 11-03 | Gp3 | g.chr4:42583750C>T   | Splice Site       | ATP8A1    |          | ATPase, aminophosphol 60          | 60 (0.00)  | 39 (0.18) | 0.48 |
| 11-03 | Gp3 | g.chr20:50307358C>A  | Splice Site       | ATP9A     | p.D215Y  | ATPase, class II, type 9 22       | 22 (0.00)  | 22 (0.27) | 0.73 |
| 11-03 | Gp3 | g.chr18:77037157G>C  | Missense Mutation | ATP9B     | p.E458Q  | ATPase, class II, type 9 29       | 29 (0.00)  | 46 (0.17) | 0.46 |
| 11-03 | Gp3 | g.chr10:117059655G>A | Missense Mutation | ATRNL1    | p.D843N  | attractin-like 1                  | 28 (0.00)  | 35 (0.14) | 0.38 |
| 11-03 | Gp3 | g.chr21:11038839C>T  | RNA               | BAGE2     |          | B melanoma antigen family 35      | 35 (0.00)  | 32 (0.19) | 0.50 |
| 11-03 | Gp3 | g.chr20:52570037A>G  | Silent            | BCAS1     | p.N538N  | breast carcinoma amplification 36 | 36 (0.00)  | 18 (0.28) | 0.74 |
| 11-03 | Gp3 | g.chr12:12240146G>A  | Splice Site       | BCL2L14   |          | BCL2-like 14 (apoptosis) 20       | 20 (0.00)  | 19 (0.26) | 0.70 |
| 11-03 | Gp3 | g.chr1:147095774G>C  | Missense Mutation | BCL9      | p.G1099R | B-cell CLL/lymphoma 9 75          | 75 (0.00)  | 52 (0.38) | 1.03 |
| 11-03 | Gp3 | g.chr20:17475429C>A  | Missense Mutation | BFSP1     | p.D430Y  | beaded filament structure 79      | 79 (0.00)  | 34 (0.15) | 0.39 |
| 11-03 | Gp3 | g.chr20:17475435G>A  | Missense Mutation | BFSP1     | p.P428S  | beaded filament structure 85      | 85 (0.01)  | 35 (0.20) | 0.53 |
| 11-03 | Gp3 | g.chr15:91348569T>C  | Intron            | BLM       |          | Bloom syndrome, RecQ 42           | 42 (0.02)  | 76 (0.21) | 0.56 |
| 11-03 | Gp3 | g.chr8:22054929C>T   | Silent            | BMP1      | p.F701F  | bone morphogenetic protein 25     | 25 (0.00)  | 35 (0.54) | 0.72 |
| 11-03 | Gp3 | g.chrX:50659312C>A   | Missense Mutation | BMP15     | p.P295H  | bone morphogenetic protein 30     | 30 (0.00)  | 13 (0.38) | 0.64 |
| 11-03 | Gp3 | g.chr4:79832083G>T   | Missense Mutation | BMP2K     | p.E794D  | BMP2 inducible kinase 77          | 77 (0.00)  | 60 (0.18) | 0.49 |
| 11-03 | Gp3 | g.chr9:16436700G>C   | Missense Mutation | BNC2      | p.H498D  | basonuclin 2                      | 48 (0.00)  | 23 (0.22) | 0.58 |
| 11-03 | Gp3 | g.chr8:26265814G>T   | Missense Mutation | BNIP3L    | p.G138V  | BCL2/adenovirus E1B 130           | 130 (0.00) | 25 (0.32) | 0.43 |
| 11-03 | Gp3 | g.chr4:13604882G>C   | Silent            | BOD1L1    | p.S1214S | biorientation of chromosome 70    | 70 (0.00)  | 43 (0.21) | 0.56 |
| 11-03 | Gp3 | g.chr17:65909253G>T  | Missense Mutation | BPTF      | p.L1751F | bromodomain PHD finger 93         | 93 (0.00)  | 80 (0.16) | 0.43 |
| 11-03 | Gp3 | g.chr17:41232169G>A  | Intron            | BRCA1     |          | breast cancer 1, early onset 28   | 28 (0.00)  | 32 (0.22) | 0.58 |

|       |     |                      |                   |           |         |                                               |           |      |
|-------|-----|----------------------|-------------------|-----------|---------|-----------------------------------------------|-----------|------|
| 11-03 | Gp3 | g.chr17:41276867G>A  | Intron            | BRCA1     |         | breast cancer 1, early on 19 (0.00)           | 30 (0.20) | 0.53 |
| 11-03 | Gp3 | g.chr1:190068061C>A  | Missense Mutation | BRINP3    | p.C463F | bone morphogenetic pro 15 (0.00)              | 21 (0.29) | 0.76 |
| 11-03 | Gp3 | g.chr6:26444532G>T   | Splice Site       | BTN3A3    | p.A103S | butyrophilin, subfamily 41 (0.00)             | 44 (0.16) | 0.42 |
| 11-03 | Gp3 | g.chr10:71391587C>T  | Missense Mutation | C10orf35  | p.P30S  | chromosome 10 open re 32 (0.03)               | 28 (0.18) | 0.48 |
| 11-03 | Gp3 | g.chr10:50531797C>G  | Missense Mutation | C10orf71  | p.Q403E | chromosome 10 open re 77 (0.00)               | 85 (0.33) | 0.64 |
| 11-03 | Gp3 | g.chr11:66581366C>G  | Missense Mutation | C11orf80  | p.L139V | chromosome 11 open re 27 (0.00)               | 47 (0.15) | 0.40 |
| 11-03 | Gp3 | g.chr12:110488874C>T | Silent            | C12orf76  | p.E79E  | chromosome 12 open re 52 (0.00)               | 18 (0.28) | 0.74 |
| 11-03 | Gp3 | g.chr14:23727835C>A  | Silent            | C14orf164 | p.A102A | 25 (0.00)                                     | 14 (0.36) | 0.95 |
| 11-03 | Gp3 | g.chr17:42744547G>A  | Missense Mutation | C17orf104 | p.G423E | chromosome 17 open re 56 (0.02)               | 35 (0.20) | 0.53 |
| 11-03 | Gp3 | g.chr18:21104127C>A  | Missense Mutation | C18orf8   | p.P284Q | chromosome 18 open re 53 (0.02)               | 25 (0.20) | 0.53 |
| 11-03 | Gp3 | g.chr2:70387817C>A   | Missense Mutation | C2orf42   | p.G486C | chromosome 2 open rea 64 (0.00)               | 42 (0.17) | 0.44 |
| 11-03 | Gp3 | g.chr5:40947862C>T   | Silent            | C7        | p.Y299Y | complement component 38 (0.00)                | 23 (0.26) | 0.70 |
| 11-03 | Gp3 | g.chr9:97563235C>T   | Silent            | C9orf3    | p.L439L | chromosome 9 open rea 24 (0.00)               | 25 (0.32) | 0.85 |
| 11-03 | Gp3 | g.chr3:54905625G>T   | Silent            | CACNA2D3  | p.V562V | calcium channel, voltage 44 (0.00)            | 38 (0.24) | 0.63 |
| 11-03 | Gp3 | g.chr3:85010092C>A   | Intron            | CADM2     |         | cell adhesion molecule 262 (0.00)             | 33 (0.18) | 0.48 |
| 11-03 | Gp3 | g.chr3:85022780C>A   | Intron            | CADM2     |         | cell adhesion molecule 217 (0.00)             | 27 (0.33) | 0.49 |
| 11-03 | Gp3 | g.chr3:85493055C>T   | Intron            | CADM2     |         | cell adhesion molecule 249 (0.00)             | 46 (0.28) | 0.42 |
| 11-03 | Gp3 | g.chr3:85680350C>A   | Intron            | CADM2     |         | cell adhesion molecule 247 (0.00)             | 21 (0.76) | 1.13 |
| 11-03 | Gp3 | g.chr3:85752673C>G   | Intron            | CADM2     |         | cell adhesion molecule 228 (0.00)             | 18 (0.56) | 0.82 |
| 11-03 | Gp3 | g.chr3:86040213C>T   | Intron            | CADM2     |         | cell adhesion molecule 225 (0.00)             | 25 (0.32) | 0.47 |
| 11-03 | Gp3 | g.chr3:86063464C>T   | Intron            | CADM2     |         | cell adhesion molecule 240 (0.00)             | 23 (0.26) | 0.39 |
| 11-03 | Gp3 | g.chr7:122111479G>T  | Silent            | CADPS2    | p.T709T | Ca <sup>++</sup> -dependent secreti 35 (0.00) | 24 (0.29) | 0.78 |
| 11-03 | Gp3 | g.chr6:7374231G>A    | Missense Mutation | CAGE1     | p.S274F | cancer antigen 1 35 (0.00)                    | 32 (0.16) | 0.42 |
| 11-03 | Gp3 | g.chr17:46919190C>G  | Missense Mutation | CALCOCO2  | p.H41D  | calcium binding and coi 36 (0.00)             | 24 (0.21) | 0.56 |
| 11-03 | Gp3 | g.chr1:230903441G>A  | Missense Mutation | CAPN9     | p.G231S | calpain 9 89 (0.01)                           | 57 (0.28) | 0.75 |
| 11-03 | Gp3 | g.chr2:202068456G>C  | Missense Mutation | CASP10    | p.E230Q | caspase 10, apoptosis-re 15 (0.00)            | 30 (0.17) | 0.44 |
| 11-03 | Gp3 | g.chr20:32224476G>A  | Missense Mutation | CBFA2T2   | p.G420D | core-binding factor, run 28 (0.00)            | 55 (0.20) | 0.53 |
| 11-03 | Gp3 | g.chr17:42978449G>A  | Missense Mutation | CCDC103   | p.R28Q  | coiled-coil domain cont 15 (0.00)             | 20 (0.30) | 0.80 |
| 11-03 | Gp3 | g.chr6:151894414G>A  | Missense Mutation | CCDC170   | p.E294K | coiled-coil domain cont 40 (0.03)             | 30 (0.40) | 1.07 |
| 11-03 | Gp3 | g.chr19:30308411C>A  | Missense Mutation | CCNE1     | p.P142Q | cyclin E1 36 (0.03)                           | 32 (0.22) | 0.58 |
| 11-03 | Gp3 | g.chr14:99959079C>A  | Missense Mutation | CCNK      | p.P22Q  | cyclin K 29 (0.00)                            | 29 (0.28) | 0.74 |
| 11-03 | Gp3 | g.chr10:35841983G>A  | Missense Mutation | CCNY      | p.D206N | cyclin Y 31 (0.00)                            | 32 (0.16) | 0.42 |
| 11-03 | Gp3 | g.chr15:55652131G>A  | Missense Mutation | CCPG1     | p.P614S | cell cycle progression 1 52 (0.00)            | 23 (0.26) | 0.70 |
| 11-03 | Gp3 | g.chr3:46415177G>T   | Nonsense Mutation | CCR5      | p.E262* | chemokine (C-C motif) 101 (0.00)              | 54 (0.17) | 0.44 |
| 11-03 | Gp3 | g.chr1:229462521C>T  | Silent            | CCSAP     | p.K200K | centriole, cilia and spinc 17 (0.00)          | 16 (0.44) | 1.17 |

|       |     |                      |                   |          |          |                                              |           |      |
|-------|-----|----------------------|-------------------|----------|----------|----------------------------------------------|-----------|------|
| 11-03 | Gp3 | g.chr21:30432971G>T  | Missense Mutation | CCT8     | p.P487H  | chaperonin containing T48 (0.00)             | 24 (0.25) | 0.67 |
| 11-03 | Gp3 | g.chr1:100964625C>T  | Missense Mutation | CDC14A   | p.S521F  | cell division cycle 14A 44 (0.00)            | 21 (0.38) | 1.02 |
| 11-03 | Gp3 | g.chr16:68845622G>A  | Missense Mutation | CDH1     | p.D290N  | cadherin 1, type 1, E-ca $\alpha$ 33 (0.00)  | 49 (0.53) | 1.41 |
| 11-03 | Gp3 | g.chr16:68856084C>T  | Missense Mutation | CDH1     | p.T631I  | cadherin 1, type 1, E-ca $\alpha$ 57 (0.00)  | 55 (0.15) | 0.39 |
| 11-03 | Gp3 | g.chr5:19721472G>A   | Silent            | CDH18    | p.S209S  | cadherin 18, type 2 61 (0.00)                | 51 (0.25) | 0.68 |
| 11-03 | Gp3 | g.chr10:73330613G>A  | Missense Mutation | CDH23    | p.D236N  | cadherin-related 23 65 (0.00)                | 31 (0.16) | 0.43 |
| 11-03 | Gp3 | g.chr2:202688429G>A  | Silent            | CDK15    | p.G195G  | cyclin-dependent kinase 19 (0.00)            | 27 (0.22) | 0.59 |
| 11-03 | Gp3 | g.chr17:15496717C>A  | Missense Mutation | CDRT1    | p.C647F  | CMT1A duplicated regi 31 (0.00)              | 89 (0.19) | 0.51 |
| 11-03 | Gp3 | g.chr20:5165575G>A   | Missense Mutation | CDS2     | p.R248Q  | CDP-diacylglycerol syn 50 (0.00)             | 54 (0.15) | 0.40 |
| 11-03 | Gp3 | g.chr19:51984800C>A  | Missense Mutation | CEACAM18 | p.P185Q  | carcinoembryonic antigen 27 (0.00)           | 28 (0.29) | 0.76 |
| 11-03 | Gp3 | g.chr19:42219780C>A  | Missense Mutation | CEACAM5  | p.D305E  | carcinoembryonic antigen 18 (0.00)           | 35 (0.37) | 0.99 |
| 11-03 | Gp3 | g.chr22:18028342C>T  | Missense Mutation | CECR2    | p.P958L  | cat eye syndrome chrom 15 (0.00)             | 14 (0.36) | 0.95 |
| 11-03 | Gp3 | g.chr1:214830542G>A  | Missense Mutation | CENPF    | p.E2918K | centromere protein F, 3 $\epsilon$ 48 (0.00) | 23 (0.26) | 0.70 |
| 11-03 | Gp3 | g.chr15:49030885C>T  | Missense Mutation | CEP152   | p.G1565E | centrosomal protein 152 19 (0.00)            | 27 (0.22) | 0.59 |
| 11-03 | Gp3 | g.chr11:117258017G>A | Missense Mutation | CEP164   | p.R608K  | centrosomal protein 164 40 (0.00)            | 38 (0.29) | 0.77 |
| 11-03 | Gp3 | g.chr18:13073100T>A  | Missense Mutation | CEP192   | p.F1844L | centrosomal protein 192 32 (0.03)            | 29 (0.17) | 0.46 |
| 11-03 | Gp3 | g.chr18:13087166G>C  | Missense Mutation | CEP192   | p.A1923P | centrosomal protein 192 17 (0.00)            | 28 (0.29) | 0.76 |
| 11-03 | Gp3 | g.chr19:33409182C>G  | Missense Mutation | CEP89    | p.L444F  | centrosomal protein 89k 44 (0.00)            | 29 (0.24) | 0.64 |
| 11-03 | Gp3 | g.chr17:62525531C>A  | Missense Mutation | CEP95    | p.Q478K  | centrosomal protein 95k 45 (0.00)            | 40 (0.40) | 1.07 |
| 11-03 | Gp3 | g.chr10:90966441G>T  | Missense Mutation | CH25H    | p.F203L  | cholesterol 25-hydroxylase 46 (0.00)         | 16 (0.56) | 0.42 |
| 11-03 | Gp3 | g.chr1:6176971C>A    | Intron            | CHD5     |          | chromodomain helicase 34 (0.00)              | 23 (0.26) | 0.70 |
| 11-03 | Gp3 | g.chr1:6186797C>A    | Nonsense Mutation | CHD5     | p.E1305* | chromodomain helicase 17 (0.00)              | 23 (0.22) | 0.58 |
| 11-03 | Gp3 | g.chr20:40050674C>T  | Missense Mutation | CHD6     | p.R1534H | chromodomain helicase 19 (0.00)              | 17 (0.29) | 0.78 |
| 11-03 | Gp3 | g.chr16:53357980G>A  | Missense Mutation | CHD9     | p.V2607M | chromodomain helicase 42 (0.00)              | 32 (0.59) | 1.58 |
| 11-03 | Gp3 | g.chr16:53358003G>A  | Silent            | CHD9     | p.R2614R | chromodomain helicase 46 (0.00)              | 35 (0.54) | 1.45 |
| 11-03 | Gp3 | g.chr1:203188407C>G  | Silent            | CHIT1    | p.V322V  | chitinase 1 (chitotriosidase) 18 (0.00)      | 17 (0.59) | 1.57 |
| 11-03 | Gp3 | g.chr3:369945G>A     | Missense Mutation | CHL1     | p.G98E   | cell adhesion molecule 152 (0.00)            | 46 (0.20) | 0.52 |
| 11-03 | Gp3 | g.chr3:33648117C>A   | Missense Mutation | CLASP2   | p.D555Y  | cytoplasmic linker associated 37 (0.00)      | 41 (0.32) | 0.85 |
| 11-03 | Gp3 | g.chr3:190106156C>T  | Missense Mutation | CLDN16   | p.A83V   | claudin 16 40 (0.00)                         | 34 (0.15) | 0.39 |
| 11-03 | Gp3 | g.chr3:190122587C>T  | Missense Mutation | CLDN16   | p.A155V  | claudin 16 33 (0.00)                         | 27 (0.33) | 0.89 |
| 11-03 | Gp3 | g.chr1:36202600C>A   | Missense Mutation | CLSPN    | p.S1275I | claspin 41 (0.00)                            | 40 (0.20) | 0.53 |
| 11-03 | Gp3 | g.chr3:140275406G>A  | Missense Mutation | CLSTN2   | p.G576R  | calsyntenin 2 43 (0.00)                      | 30 (0.33) | 0.89 |
| 11-03 | Gp3 | g.chr22:19222226G>A  | Silent            | CLTCL1   | p.L325L  | clathrin, heavy chain-like 71 (0.00)         | 77 (0.14) | 0.38 |
| 11-03 | Gp3 | g.chr6:25093923G>T   | RNA               | CMAHP    |          | cytidine monophosphate 153 (0.00)            | 23 (0.30) | 0.81 |
| 11-03 | Gp3 | g.chrX:150912578C>G  | Missense Mutation | CNGA2    | p.R535G  | cyclic nucleotide-gated channel 20 (0.00)    | 12 (0.42) | 0.69 |

|       |     |                      |                   |          |          |                                    |            |      |
|-------|-----|----------------------|-------------------|----------|----------|------------------------------------|------------|------|
| 11-03 | Gp3 | g.chr19:11658639G>A  | Missense Mutation | CNN1     | p.V90M   | calponin 1, basic, smoot 17 (0.00) | 40 (0.33)  | 1.09 |
| 11-03 | Gp3 | g.chr8:17089998G>A   | Missense Mutation | CNOT7    | p.P223S  | CCR4-NOT transcriptio 33 (0.00)    | 17 (0.29)  | 0.39 |
| 11-03 | Gp3 | g.chr7:147926844C>G  | Silent            | CNTNAP2  | p.T1118T | contactin associated pro 49 (0.00) | 24 (0.21)  | 0.56 |
| 11-03 | Gp3 | g.chr9:39175963G>A   | Missense Mutation | CNTNAP3  | p.P352S  | contactin associated pro 37 (0.03) | 32 (0.22)  | 0.58 |
| 11-03 | Gp3 | g.chr9:43737419C>T   | Nonsense Mutation | CNTNAP3B | p.Q97*   | contactin associated pro 46 (0.00) | 33 (0.30)  | 0.81 |
| 11-03 | Gp3 | g.chr9:123888093C>G  | Missense Mutation | CNTRL    | p.A635G  | centriolin 79 (0.00)               | 38 (0.16)  | 0.42 |
| 11-03 | Gp3 | g.chr1:103471414G>T  | Missense Mutation | COL11A1  | p.P609T  | collagen, type XI, alpha 15 (0.00) | 30 (0.20)  | 0.53 |
| 11-03 | Gp3 | g.chr1:86375632C>G   | Splice Site       | COL24A1  |          | collagen, type XXIV, al 36 (0.00)  | 24 (0.46)  | 1.22 |
| 11-03 | Gp3 | g.chr9:116931208C>T  | Missense Mutation | COL27A1  | p.A458V  | collagen, type XXVII, a 97 (0.00)  | 65 (0.18)  | 0.49 |
| 11-03 | Gp3 | g.chr13:111088659C>T | Missense Mutation | COL4A2   | p.T257I  | collagen, type IV, alpha 20 (0.00) | 22 (0.27)  | 0.73 |
| 11-03 | Gp3 | g.chrX:107403853C>A  | Missense Mutation | COL4A6   | p.M1455I | collagen, type IV, alpha 17 (0.00) | 21 (0.24)  | 0.40 |
| 11-03 | Gp3 | g.chr2:238249748G>A  | Missense Mutation | COL6A3   | p.P2604L | collagen, type VI, alpha 74 (0.00) | 56 (0.27)  | 0.71 |
| 11-03 | Gp3 | g.chr3:148917582A>G  | Missense Mutation | CP       | p.L473P  | ceruloplasmin (ferroxid 19 (0.00)  | 30 (0.30)  | 0.80 |
| 11-03 | Gp3 | g.chr1:207718722G>A  | Missense Mutation | CR1      | p.G769E  | complement component 99 (0.01)     | 40 (0.25)  | 0.41 |
| 11-03 | Gp3 | g.chr1:207718724C>A  | Missense Mutation | CR1      | p.Q770K  | complement component 100 (0.00)    | 41 (0.24)  | 0.40 |
| 11-03 | Gp3 | g.chr1:207718748C>A  | Missense Mutation | CR1      | p.P778T  | complement component 88 (0.00)     | 41 (0.24)  | 0.40 |
| 11-03 | Gp3 | g.chr20:20020291C>T  | Missense Mutation | CRNKL1   | p.E503K  | crooked neck pre-mRN 18 (0.00)     | 31 (0.29)  | 0.77 |
| 11-03 | Gp3 | g.chr1:34082573G>T   | Silent            | CSMD2    | p.G856G  | CUB and Sushi multiple 28 (0.00)   | 37 (0.16)  | 0.43 |
| 11-03 | Gp3 | g.chr15:64592601G>T  | Nonsense Mutation | CSNK1G1  | p.S33*   | casein kinase 1, gamma 56 (0.00)   | 70 (0.17)  | 0.46 |
| 11-03 | Gp3 | g.chr20:18142648C>T  | Silent            | CSRP2BP  | p.T288T  | CSRP2 binding protein 46 (0.00)    | 34 (0.18)  | 0.47 |
| 11-03 | Gp3 | g.chr20:18167932C>T  | Silent            | CSRP2BP  | p.T725T  | CSRP2 binding protein 69 (0.00)    | 42 (0.19)  | 0.51 |
| 11-03 | Gp3 | g.chr18:46238028C>A  | Missense Mutation | CTIF     | p.H182Q  | CBP80/20-dependent tra 89 (0.00)   | 44 (0.18)  | 0.48 |
| 11-03 | Gp3 | g.chrX:16685647G>A   | Missense Mutation | CTPS2    | p.P429L  | CTP synthase 2 16 (0.00)           | 161 (0.25) | 0.42 |
| 11-03 | Gp3 | g.chr11:88027470G>A  | Missense Mutation | CTSC     | p.H366Y  | cathepsin C 39 (0.00)              | 41 (0.15)  | 0.39 |
| 11-03 | Gp3 | g.chr10:104183330C>T | Splice Site       | CUEDC2   |          | CUE domain containing 70 (0.00)    | 48 (0.17)  | 0.44 |
| 11-03 | Gp3 | g.chr7:148481082A>G  | Missense Mutation | CUL1     | p.N404S  | cullin 1 20 (0.00)                 | 35 (0.23)  | 0.61 |
| 11-03 | Gp3 | g.chr6:43160931G>A   | Silent            | CUL9     | p.Q791Q  | cullin 9 85 (0.00)                 | 85 (0.16)  | 0.44 |
| 11-03 | Gp3 | g.chr6:43172580C>G   | Missense Mutation | CUL9     | p.S1478R | cullin 9 35 (0.00)                 | 22 (0.64)  | 1.70 |
| 11-03 | Gp3 | g.chr19:15996780C>A  | Nonsense Mutation | CYP4F2   | p.E357*  | cytochrome P450, famil 73 (0.00)   | 44 (0.16)  | 0.42 |
| 11-03 | Gp3 | g.chr8:59409351C>A   | Missense Mutation | CYP7A1   | p.E240D  | cytochrome P450, famil 19 (0.00)   | 26 (0.35)  | 0.92 |
| 11-03 | Gp3 | g.chr6:39835356G>A   | Missense Mutation | DAAM2    | p.A167T  | dishevelled associated a 38 (0.00) | 32 (0.41)  | 1.08 |
| 11-03 | Gp3 | g.chr9:124396222G>A  | Intron            | DAB2IP   |          | DAB2 interacting protei 19 (0.00)  | 16 (0.44)  | 1.17 |
| 11-03 | Gp3 | g.chr9:124396271C>A  | Intron            | DAB2IP   |          | DAB2 interacting protei 21 (0.00)  | 16 (0.44)  | 1.17 |
| 11-03 | Gp3 | g.chr9:124471241G>A  | Intron            | DAB2IP   |          | DAB2 interacting protei 31 (0.03)  | 21 (0.24)  | 0.63 |
| 11-03 | Gp3 | g.chr9:124510058C>A  | Intron            | DAB2IP   |          | DAB2 interacting protei 51 (0.02)  | 78 (0.22)  | 0.58 |

|       |     |                      |                   |         |          |                                    |           |      |
|-------|-----|----------------------|-------------------|---------|----------|------------------------------------|-----------|------|
| 11-03 | Gp3 | g.chr3:98518245C>A   | Nonsense Mutation | DCBLD2  | p.E767*  | discoidin, CUB and LC(73 (0.01)    | 42 (0.19) | 0.51 |
| 11-03 | Gp3 | g.chr11:125780267C>A | Nonsense Mutation | DDX25   | p.C172*  | DEAD (Asp-Glu-Ala-A 56 (0.00)      | 30 (0.27) | 0.71 |
| 11-03 | Gp3 | g.chr11:125781347C>A | Missense Mutation | DDX25   | p.T255N  | DEAD (Asp-Glu-Ala-A 22 (0.00)      | 47 (0.15) | 0.40 |
| 11-03 | Gp3 | g.chr5:176943332G>A  | Silent            | DDX41   | p.V85V   | DEAD (Asp-Glu-Ala-A 54 (0.00)      | 28 (0.43) | 1.14 |
| 11-03 | Gp3 | g.chr20:29978235C>G  | Missense Mutation | DEFB119 | p.V18L   | defensin, beta 119 51 (0.00)       | 61 (0.20) | 0.52 |
| 11-03 | Gp3 | g.chr1:197564340G>A  | Missense Mutation | DENND1B | p.P349S  | DENN/MADD domain 88 (0.00)         | 16 (0.31) | 0.83 |
| 11-03 | Gp3 | g.chr9:19300213A>G   | Missense Mutation | DENND4C | p.N399D  | DENN/MADD domain 21 (0.00)         | 16 (0.38) | 1.00 |
| 11-03 | Gp3 | g.chr12:31576601C>A  | Silent            | DENND5B | p.S800S  | DENN/MADD domain 55 (0.02)         | 31 (0.16) | 0.43 |
| 11-03 | Gp3 | g.chr10:12131185G>A  | Silent            | DHTKD1  | p.Q306Q  | dehydrogenase E1 and t 29 (0.00)   | 27 (0.26) | 0.69 |
| 11-03 | Gp3 | g.chr4:24531230G>A   | Missense Mutation | DHX15   | p.P755L  | DEAH (Asp-Glu-Ala-H 20 (0.00)      | 31 (0.32) | 0.86 |
| 11-03 | Gp3 | g.chr1:182853896C>A  | Missense Mutation | DHX9    | p.Q1137K | DEAH (Asp-Glu-Ala-H 46 (0.00)      | 37 (0.16) | 0.43 |
| 11-03 | Gp3 | g.chr5:140951572C>T  | Nonsense Mutation | DIAPH1  | p.W798*  | diaphanous-related form 46 (0.00)  | 54 (0.15) | 0.40 |
| 11-03 | Gp3 | g.chr21:47959793C>T  | Missense Mutation | DIP2A   | p.S638L  | DIP2 disco-interacting p 46 (0.00) | 36 (0.31) | 0.81 |
| 11-03 | Gp3 | g.chr10:327151G>A    | Silent            | DIP2C   | p.S1469S | DIP2 disco-interacting p 23 (0.00) | 27 (0.19) | 0.49 |
| 11-03 | Gp3 | g.chr4:107845774C>T  | Missense Mutation | DKK2    | p.G153S  | dickkopf WNT signaling 22 (0.00)   | 13 (0.46) | 1.23 |
| 11-03 | Gp3 | g.chr6:43420746T>A   | Nonsense Mutation | DLK2    | p.K90*   | delta-like 2 homolog (D 65 (0.00)  | 53 (0.23) | 0.60 |
| 11-03 | Gp3 | g.chr5:118469387T>C  | Silent            | DMXL1   | p.L590L  | Dmx-like 1 24 (0.00)               | 19 (0.26) | 0.70 |
| 11-03 | Gp3 | g.chr12:124270391C>A | Missense Mutation | DNAH10  | p.N382K  | dynein, axonemal, heavy 15 (0.00)  | 27 (0.19) | 0.49 |
| 11-03 | Gp3 | g.chr17:7696430G>A   | Missense Mutation | DNAH2   | p.M2492I | dynein, axonemal, heavy 85 (0.01)  | 14 (0.36) | 0.45 |
| 11-03 | Gp3 | g.chr5:13753483G>C   | Missense Mutation | DNAH5   | p.N3577K | dynein, axonemal, heavy 33 (0.00)  | 31 (0.19) | 0.52 |
| 11-03 | Gp3 | g.chr17:11784611C>A  | Missense Mutation | DNAH9   | p.Q3563K | dynein, axonemal, heavy 50 (0.00)  | 21 (0.33) | 0.89 |
| 11-03 | Gp3 | g.chr4:100851688G>A  | Missense Mutation | DNAJB14 | p.P75L   | DnaJ (Hsp40) homolog, 54 (0.00)    | 34 (0.15) | 0.39 |
| 11-03 | Gp3 | g.chr7:157178310G>T  | Missense Mutation | DNAJB6  | p.K232N  | DnaJ (Hsp40) homolog, 33 (0.00)    | 57 (0.32) | 0.84 |
| 11-03 | Gp3 | g.chr12:49743437C>T  | Missense Mutation | DNAJC22 | p.A261V  | DnaJ (Hsp40) homolog, 40 (0.00)    | 34 (0.18) | 0.47 |
| 11-03 | Gp3 | g.chr20:31395664C>G  | Missense Mutation | DNMT3B  | p.I839M  | DNA (cytosine-5-)-met 35 (0.00)    | 21 (0.24) | 0.63 |
| 11-03 | Gp3 | g.chr10:128795093C>A | Missense Mutation | DOCK1   | p.F185L  | dedicator of cytokinesis 76 (0.00) | 31 (0.26) | 0.69 |
| 11-03 | Gp3 | g.chr10:128851012T>C | Missense Mutation | DOCK1   | p.Y736H  | dedicator of cytokinesis 77 (0.00) | 82 (0.15) | 0.39 |
| 11-03 | Gp3 | g.chr2:225661090C>T  | Silent            | DOCK10  | p.R1627R | dedicator of cytokinesis 51 (0.00) | 36 (0.19) | 0.52 |
| 11-03 | Gp3 | g.chr5:169412892G>T  | Nonsense Mutation | DOCK2   | p.G479*  | dedicator of cytokinesis 17 (0.00) | 27 (0.30) | 0.79 |
| 11-03 | Gp3 | g.chr3:51297638C>A   | Silent            | DOCK3   | p.R746R  | dedicator of cytokinesis 46 (0.00) | 29 (0.17) | 0.46 |
| 11-03 | Gp3 | g.chr7:111629173C>T  | Missense Mutation | DOCK4   | p.E121K  | dedicator of cytokinesis 55 (0.00) | 41 (0.17) | 0.46 |
| 11-03 | Gp3 | g.chr7:111629174A>T  | Missense Mutation | DOCK4   | p.N120K  | dedicator of cytokinesis 55 (0.00) | 42 (0.17) | 0.44 |
| 11-03 | Gp3 | g.chr13:99537971C>T  | Missense Mutation | DOCK9   | p.E751K  | dedicator of cytokinesis 65 (0.00) | 29 (0.38) | 1.01 |
| 11-03 | Gp3 | g.chr18:29126520G>A  | Silent            | DSG2    | p.L1057L | desmoglein 2 40 (0.00)             | 34 (0.18) | 0.47 |
| 11-03 | Gp3 | g.chr18:28968847G>A  | Missense Mutation | DSG4    | p.R128Q  | desmoglein 4 55 (0.00)             | 47 (0.30) | 0.79 |



|       |     |                      |                   |          |          |                                   |            |            |      |
|-------|-----|----------------------|-------------------|----------|----------|-----------------------------------|------------|------------|------|
| 11-03 | Gp3 | g.chr6:7584936G>T    | Nonsense Mutation | DSP      | p.E2481* | desmoplakin                       | 22 (0.00)  | 18 (0.33)  | 0.89 |
| 11-03 | Gp3 | g.chr7:76112300C>A   | Missense Mutation | DTX2     | p.N248K  | deltex 2, E3 ubiquitin li         | 37 (0.00)  | 29 (0.21)  | 0.55 |
| 11-03 | Gp3 | g.chr1:221879599C>T  | Missense Mutation | DUSP10   | p.D341N  | dual specificity phosphatase      | 93 (0.00)  | 43 (0.19)  | 0.50 |
| 11-03 | Gp3 | g.chr17:35872602G>T  | Silent            | DUSP14   | p.V76V   | dual specificity phosphatase      | 22 (0.00)  | 20 (0.25)  | 0.67 |
| 11-03 | Gp3 | g.chr3:108363240G>A  | Silent            | DZIP3    | p.K457K  | DAZ interacting zinc finger       | 47 (0.00)  | 37 (0.22)  | 0.58 |
| 11-03 | Gp3 | g.chr16:22284998G>T  | Nonsense Mutation | EEF2K    | p.E606*  | eukaryotic elongation factor      | 41 (0.00)  | 21 (0.29)  | 0.76 |
| 11-03 | Gp3 | g.chr17:78111277C>A  | Missense Mutation | EIF4A3   | p.M297I  | eukaryotic translation initiation | 32 (0.00)  | 24 (0.21)  | 0.56 |
| 11-03 | Gp3 | g.chr3:184049091G>A  | Missense Mutation | EIF4G1   | p.G1313E | eukaryotic translation initiation | 54 (0.00)  | 36 (0.19)  | 0.52 |
| 11-03 | Gp3 | g.chr19:48517459C>T  | Silent            | ELSPBP1  | p.T34T   | epididymal sperm binding          | 28 (0.00)  | 19 (0.37)  | 1.30 |
| 11-03 | Gp3 | g.chr11:62375768C>T  | Splice Site       | EML3     | p.D371N  | echinoderm microtubule            | 74 (0.00)  | 63 (0.17)  | 0.47 |
| 11-03 | Gp3 | g.chr11:62375769C>T  | Splice Site       | EML3     |          | echinoderm microtubule            | 74 (0.00)  | 63 (0.16)  | 0.42 |
| 11-03 | Gp3 | g.chr14:89087233C>T  | Missense Mutation | EML5     | p.R1747H | echinoderm microtubule            | 44 (0.00)  | 56 (0.14)  | 0.38 |
| 11-03 | Gp3 | g.chr14:89148295G>T  | Silent            | EML5     | p.T1021T | echinoderm microtubule            | 72 (0.00)  | 40 (0.20)  | 0.53 |
| 11-03 | Gp3 | g.chr19:6986347G>T   | RNA               | EMR4P    |          | egf-like module containing        | 90 (0.00)  | 58 (0.12)  | 0.46 |
| 11-03 | Gp3 | g.chr17:77073766C>G  | Missense Mutation | ENGASE   | p.T79S   | endo-beta-N-acetylglucosaminidase | 43 (0.00)  | 14 (0.43)  | 1.14 |
| 11-03 | Gp3 | g.chr22:40161390C>A  | Missense Mutation | ENTHD1   | p.D353Y  | ENTH domain containing            | 19 (0.00)  | 30 (0.23)  | 0.62 |
| 11-03 | Gp3 | g.chr10:101445560C>A | Missense Mutation | ENTPD7   | p.A187D  | ectonucleoside triphosphatase     | 32 (0.00)  | 25 (0.24)  | 0.64 |
| 11-03 | Gp3 | g.chr3:89390154A>C   | Silent            | EPHA3    | p.S301S  | EPH receptor A3                   | 33 (0.00)  | 48 (0.15)  | 0.39 |
| 11-03 | Gp3 | g.chr17:19215416G>A  | Missense Mutation | EPN2     | p.E311K  | epsin 2                           | 97 (0.01)  | 102 (0.18) | 0.47 |
| 11-03 | Gp3 | g.chr17:19215426G>A  | Missense Mutation | EPN2     | p.R314K  | epsin 2                           | 75 (0.00)  | 93 (0.19)  | 0.52 |
| 11-03 | Gp3 | g.chr5:96118857C>T   | Missense Mutation | ERAP1    | p.R728Q  | endoplasmic reticulum             | 30 (0.00)  | 29 (0.17)  | 0.46 |
| 11-03 | Gp3 | g.chr21:39807279T>C  | Intron            | ERG      |          | v-ets avian erythroblast cell     | 16 (0.00)  | 26 (0.31)  | 0.53 |
| 11-03 | Gp3 | g.chr21:39811696C>G  | Intron            | ERG      |          | v-ets avian erythroblast cell     | 41 (0.00)  | 39 (0.23)  | 0.40 |
| 11-03 | Gp3 | g.chr21:39907195G>A  | Intron            | ERG      |          | v-ets avian erythroblast cell     | 32 (0.00)  | 25 (0.28)  | 0.48 |
| 11-03 | Gp3 | g.chr21:39919274G>A  | Intron            | ERG      |          | v-ets avian erythroblast cell     | 15 (0.00)  | 55 (0.38)  | 0.66 |
| 11-03 | Gp3 | g.chr21:39921764C>A  | Intron            | ERG      |          | v-ets avian erythroblast cell     | 20 (0.00)  | 28 (0.32)  | 0.55 |
| 11-03 | Gp3 | g.chr12:56527655C>T  | Missense Mutation | ESYT1    | p.P491S  | extended synaptotagmin            | 24 (0.00)  | 25 (0.20)  | 0.53 |
| 11-03 | Gp3 | g.chr4:5578040C>G    | Missense Mutation | EVC2     | p.E1067Q | Ellis van Creveld syndrome        | 26 (0.00)  | 16 (0.31)  | 0.83 |
| 11-03 | Gp3 | g.chr6:488997G>A     | Missense Mutation | EXOC2    | p.S888F  | exocyst complex component         | 45 (0.00)  | 44 (0.25)  | 0.67 |
| 11-03 | Gp3 | g.chr14:57714346C>T  | Missense Mutation | EXOC5    | p.D38N   | exocyst complex component         | 24 (0.00)  | 13 (0.38)  | 1.03 |
| 11-03 | Gp3 | g.chr9:133578479C>T  | Missense Mutation | EXOSC2   | p.R238W  | exosome component 2               | 30 (0.00)  | 33 (0.15)  | 0.40 |
| 11-03 | Gp3 | g.chr17:18430079G>A  | Silent            | FAM106A  | p.L13L   | family with sequence similarity   | 107 (0.00) | 45 (0.16)  | 0.41 |
| 11-03 | Gp3 | g.chr9:96326625G>T   | Missense Mutation | FAM120A  | p.V1054L | family with sequence similarity   | 33 (0.00)  | 20 (0.35)  | 0.93 |
| 11-03 | Gp3 | g.chr10:15256055C>A  | Missense Mutation | FAM171A1 | p.S511I  | family with sequence similarity   | 33 (0.00)  | 24 (0.21)  | 0.56 |
| 11-03 | Gp3 | g.chr10:15258105G>A  | Silent            | FAM171A1 | p.P292P  | family with sequence similarity   | 56 (0.00)  | 34 (0.29)  | 0.78 |

|       |     |                      |                   |         |          |                          |            |            |      |
|-------|-----|----------------------|-------------------|---------|----------|--------------------------|------------|------------|------|
| 11-03 | Gp3 | g.chr5:93294562C>A   | Missense Mutation | FAM172A | p.G163W  | family with sequence sim | 28 (0.00)  | 30 (0.17)  | 0.44 |
| 11-03 | Gp3 | g.chr12:49994241G>T  | Silent            | FAM186B | p.T394T  | family with sequence sim | 15 (0.00)  | 30 (0.17)  | 0.44 |
| 11-03 | Gp3 | g.chr4:2695496C>G    | Missense Mutation | FAM193A | p.T727R  | family with sequence sim | 20 (0.00)  | 29 (0.28)  | 0.74 |
| 11-03 | Gp3 | g.chr1:179023672G>T  | Missense Mutation | FAM20B  | p.G158V  | family with sequence sim | 30 (0.00)  | 35 (0.17)  | 0.46 |
| 11-03 | Gp3 | g.chr1:93309390C>A   | Silent            | FAM69A  | p.V279V  | family with sequence sim | 30 (0.00)  | 42 (0.14)  | 0.38 |
| 11-03 | Gp3 | g.chr2:33813501C>A   | Missense Mutation | FAM98A  | p.E141D  | family with sequence sim | 51 (0.02)  | 42 (0.14)  | 0.38 |
| 11-03 | Gp3 | g.chr16:89877450G>A  | Silent            | FANCA   | p.L105L  | Fanconi anemia, comple   | 57 (0.00)  | 39 (0.23)  | 0.62 |
| 11-03 | Gp3 | g.chr15:89801996C>A  | Missense Mutation | FANCI   | p.A49D   | Fanconi anemia, comple   | 31 (0.00)  | 53 (0.15)  | 0.40 |
| 11-03 | Gp3 | g.chr15:89826395G>A  | Missense Mutation | FANCI   | p.A538T  | Fanconi anemia, comple   | 69 (0.01)  | 103 (0.44) | 1.17 |
| 11-03 | Gp3 | g.chr14:45642361G>T  | Missense Mutation | FANCM   | p.C729F  | Fanconi anemia, comple   | 26 (0.00)  | 15 (0.33)  | 0.89 |
| 11-03 | Gp3 | g.chr4:187524878G>C  | Missense Mutation | FAT1    | p.A3601G | FAT atypical cadherin    | 139 (0.00) | 39 (0.15)  | 0.41 |
| 11-03 | Gp3 | g.chr5:150923229C>T  | Missense Mutation | FAT2    | p.E2487K | FAT atypical cadherin    | 228 (0.00) | 26 (0.23)  | 0.46 |
| 11-03 | Gp3 | g.chr11:92577145C>A  | Missense Mutation | FAT3    | p.R3388S | FAT atypical cadherin    | 327 (0.00) | 34 (0.24)  | 0.63 |
| 11-03 | Gp3 | g.chr11:92622393G>T  | Missense Mutation | FAT3    | p.V4214F | FAT atypical cadherin    | 320 (0.00) | 21 (0.29)  | 0.76 |
| 11-03 | Gp3 | g.chr19:40424283C>T  | Nonsense Mutation | FCGBP   | p.W640*  | Fc fragment of IgG bind  | 26 (0.04)  | 28 (0.25)  | 0.67 |
| 11-03 | Gp3 | g.chr11:72560855G>A  | Missense Mutation | FCHSD2  | p.P327L  | FCH and double SH3 dc    | 81 (0.01)  | 80 (0.15)  | 0.40 |
| 11-03 | Gp3 | g.chr1:155289606G>T  | Missense Mutation | FDPS    | p.G316W  | farnesyl diphosphate syr | 51 (0.00)  | 26 (0.35)  | 0.92 |
| 11-03 | Gp3 | g.chr20:6077627C>T   | Silent            | FERMT1  | p.E337E  | fermitin family member   | 23 (0.04)  | 39 (0.54)  | 1.44 |
| 11-03 | Gp3 | g.chr15:91430476C>A  | Missense Mutation | FES     | p.H182N  | FES proto-oncogene, tyr  | 29 (0.00)  | 26 (0.31)  | 0.82 |
| 11-03 | Gp3 | g.chr12:32786607G>A  | Missense Mutation | FGD4    | p.R741K  | FYVE, RhoGEF and PF      | 25 (0.00)  | 34 (0.18)  | 0.47 |
| 11-03 | Gp3 | g.chr10:123353286C>T | Missense Mutation | FGFR2   | p.A16T   | fibroblast growth factor | 109 (0.00) | 33 (0.18)  | 0.48 |
| 11-03 | Gp3 | g.chr1:152285455C>A  | Missense Mutation | FLG     | p.R636M  | filaggrin                | 44 (0.00)  | 38 (0.24)  | 0.44 |
| 11-03 | Gp3 | g.chr14:86088880G>A  | Missense Mutation | FLRT2   | p.G341D  | fibronectin leucine rich | 155 (0.02) | 49 (0.37)  | 0.98 |
| 11-03 | Gp3 | g.chr5:180043921C>G  | Missense Mutation | FLT4    | p.M1025I | fms-related tyrosine kin | 15 (0.00)  | 12 (0.42)  | 1.11 |
| 11-03 | Gp3 | g.chr2:153482020C>T  | Missense Mutation | FMNL2   | p.P11S   | formin-like 2            | 68 (0.00)  | 25 (0.40)  | 1.07 |
| 11-03 | Gp3 | g.chr1:171303826C>T  | Silent            | FMO4    | p.I368I  | flavin containing monoc  | 43 (0.00)  | 43 (0.16)  | 0.43 |
| 11-03 | Gp3 | g.chr6:159667938T>A  | Missense Mutation | FNDC1   | p.F1543I | fibronectin type III dom | 18 (0.00)  | 32 (0.16)  | 0.42 |
| 11-03 | Gp3 | g.chr12:2981335C>A   | Missense Mutation | FOXO1   | p.G194V  | forkhead box M1          | 52 (0.00)  | 47 (0.15)  | 0.40 |
| 11-03 | Gp3 | g.chr13:41134782C>A  | Missense Mutation | FOXO1   | p.E282D  | forkhead box O1          | 36 (0.00)  | 33 (0.24)  | 0.65 |
| 11-03 | Gp3 | g.chr19:52249646C>A  | Missense Mutation | FPR1    | p.R201I  | formyl peptide receptor  | 25 (0.00)  | 33 (0.30)  | 0.81 |
| 11-03 | Gp3 | g.chr9:14808036C>A   | Missense Mutation | FREM1   | p.G997V  | FRAS1 related extracell  | 53 (0.00)  | 40 (0.28)  | 0.73 |
| 11-03 | Gp3 | g.chrX:153774314C>T  | Silent            | G6PD    | p.E49E   | glucose-6-phosphate del  | 15 (0.00)  | 12 (0.50)  | 0.83 |
| 11-03 | Gp3 | g.chr3:30875725G>A   | Silent            | GADL1   | p.L318L  | glutamate decarboxylas   | 29 (0.00)  | 46 (0.24)  | 0.64 |
| 11-03 | Gp3 | g.chr4:844840C>T     | Missense Mutation | GAK     | p.E1181K | cyclin G associated kina | 34 (0.00)  | 32 (0.38)  | 1.00 |
| 11-03 | Gp3 | g.chr22:30951569G>A  | Nonsense Mutation | GAL3ST1 | p.R215*  | galactose-3-O-sulfotran  | 21 (0.00)  | 27 (0.19)  | 0.49 |

|       |     |                      |                   |         |          |                           |               |           |      |
|-------|-----|----------------------|-------------------|---------|----------|---------------------------|---------------|-----------|------|
| 11-03 | Gp3 | g.chr11:62407142C>T  | Missense Mutation | GANAB   | p.D34N   | glucosidase, alpha; neut  | 32 (0.00)     | 44 (0.32) | 0.85 |
| 11-03 | Gp3 | g.chr16:90099257G>A  | Silent            | GAS8    | p.K140K  | growth arrest-specific 8  | 21 (0.00)     | 29 (0.17) | 0.46 |
| 11-03 | Gp3 | g.chr19:19616154C>T  | Splice Site       | GATAD2A | p.G592G  | GATA zinc finger doma     | 36 (0.00)     | 31 (0.29) | 0.77 |
| 11-03 | Gp3 | g.chr1:155187132C>T  | RNA               | GBAP1   |          | glucosidase, beta, acid   | p 31 (0.00)   | 17 (0.41) | 1.10 |
| 11-03 | Gp3 | g.chr3:141901888C>T  | Missense Mutation | GK5     | p.A274T  | glycerol kinase 5 (puta   | t 39 (0.03)   | 36 (0.17) | 0.44 |
| 11-03 | Gp3 | g.chr17:679118C>T    | Silent            | GLOD4   | p.R101R  | glyoxalase domain cont    | r 37 (0.03)   | 57 (0.16) | 0.42 |
| 11-03 | Gp3 | g.chrX:102974051G>A  | Silent            | GLRA4   | p.G289G  | glycine receptor, alpha   | ε 23 (0.00)   | 21 (0.24) | 0.40 |
| 11-03 | Gp3 | g.chr6:1961118C>T    | Missense Mutation | GMDS    | p.G143D  | GDP-mannose 4,6-dehy      | 24 (0.00)     | 30 (0.27) | 0.71 |
| 11-03 | Gp3 | g.chr10:101162451G>T | Silent            | GOT1    | p.R330R  | glutamic-oxaloacetic tra  | 44 (0.00)     | 57 (0.25) | 0.65 |
| 11-03 | Gp3 | g.chr17:4836268C>A   | Silent            | GP1BA   | p.V123V  | glycoprotein Ib (plate    | let 35 (0.00) | 18 (0.33) | 0.42 |
| 11-03 | Gp3 | g.chr4:22439902C>T   | Silent            | GPR125  | p.V354V  | G protein-coupled recep   | 19 (0.00)     | 12 (0.42) | 1.11 |
| 11-03 | Gp3 | g.chr6:142691912G>T  | Nonsense Mutation | GPR126  | p.E351*  | G protein-coupled recep   | 50 (0.00)     | 62 (0.15) | 0.39 |
| 11-03 | Gp3 | g.chr7:37780214G>C   | Missense Mutation | GPR141  | p.L73F   | G protein-coupled recep   | 17 (0.00)     | 19 (0.26) | 0.70 |
| 11-03 | Gp3 | g.chrX:19027894C>T   | Silent            | GPR64   | p.L421L  | G protein-coupled recep   | 18 (0.00)     | 15 (0.33) | 0.56 |
| 11-03 | Gp3 | g.chrX:19027896G>T   | Missense Mutation | GPR64   | p.L421M  | G protein-coupled recep   | 18 (0.00)     | 14 (0.36) | 0.60 |
| 11-03 | Gp3 | g.chr5:89949151G>T   | Missense Mutation | GPR98   | p.A1254S | G protein-coupled recep   | 97 (0.01)     | 55 (0.35) | 0.92 |
| 11-03 | Gp3 | g.chr5:89990371G>A   | Missense Mutation | GPR98   | p.E2600K | G protein-coupled recep   | 54 (0.00)     | 45 (0.47) | 1.24 |
| 11-03 | Gp3 | g.chr17:7216981G>A   | Silent            | GPS2    | p.F180F  | G protein pathway supp    | 54 (0.00)     | 11 (0.55) | 0.69 |
| 11-03 | Gp3 | g.chr12:66788053T>A  | Silent            | GRIP1   | p.S636S  | glutamate receptor inter  | 38 (0.00)     | 27 (0.33) | 0.89 |
| 11-03 | Gp3 | g.chr6:146719966C>T  | Silent            | GRM1    | p.I597I  | glutamate receptor, met   | r 36 (0.00)   | 54 (0.17) | 0.44 |
| 11-03 | Gp3 | g.chr7:86394614C>T   | Silent            | GRM3    | p.G51G   | glutamate receptor, met   | r 22 (0.00)   | 28 (0.21) | 0.57 |
| 11-03 | Gp3 | g.chrX:16142232G>T   | Silent            | GRPR    | p.L52L   | gastrin-releasing peptid  | ε 43 (0.02)   | 30 (0.63) | 1.06 |
| 11-03 | Gp3 | g.chr8:30541638C>A   | Missense Mutation | GSR     | p.G374W  | glutathione reductase     | 45 (0.00)     | 15 (0.53) | 0.71 |
| 11-03 | Gp3 | g.chr1:110257761G>A  | Missense Mutation | GSTM5   | p.V115M  | glutathione S-transferas  | ε 42 (0.00)   | 39 (0.26) | 0.68 |
| 11-03 | Gp3 | g.chr12:124144713G>A | Splice Site       | GTF2H3  | p.E286E  | general transcription fac | 50 (0.00)     | 46 (0.15) | 0.41 |
| 11-03 | Gp3 | g.chr11:76414516G>A  | RNA               | GUCY2EP |          | guanylate cyclase 2E, p   | ε 36 (0.03)   | 33 (0.21) | 0.57 |
| 11-03 | Gp3 | g.chr7:65441189C>T   | Splice Site       | GUSB    | p.G242E  | glucuronidase, beta       | 15 (0.00)     | 22 (0.23) | 0.79 |
| 11-03 | Gp3 | g.chr4:144801602G>A  | Missense Mutation | GYPE    | p.S33F   | glycophorin E (MNS bl     | κ 125 (0.00)  | 61 (0.15) | 0.39 |
| 11-03 | Gp3 | g.chr12:21728860A>T  | Missense Mutation | GYS2    | p.H145Q  | glycogen synthase 2 (liv  | 23 (0.00)     | 42 (0.24) | 0.63 |
| 11-03 | Gp3 | g.chr2:172822404G>T  | Missense Mutation | HAT1    | p.D196Y  | histone acetyltransferas  | ε 28 (0.00)   | 30 (0.27) | 0.71 |
| 11-03 | Gp3 | g.chr7:18702262C>A   | Intron            | HDAC9   |          | histone deacetylase 9     | 47 (0.00)     | 41 (0.20) | 0.52 |
| 11-03 | Gp3 | g.chr7:18820512T>A   | Intron            | HDAC9   |          | histone deacetylase 9     | 42 (0.00)     | 16 (0.44) | 1.17 |
| 11-03 | Gp3 | g.chr7:18865206A>G   | Intron            | HDAC9   |          | histone deacetylase 9     | 31 (0.00)     | 34 (0.18) | 0.47 |
| 11-03 | Gp3 | g.chr7:18868859G>T   | Intron            | HDAC9   |          | histone deacetylase 9     | 17 (0.00)     | 30 (0.33) | 0.89 |
| 11-03 | Gp3 | g.chr7:18905211C>T   | Intron            | HDAC9   |          | histone deacetylase 9     | 53 (0.00)     | 51 (0.20) | 0.52 |

|       |     |                      |                   |           |          |                           |            |            |      |
|-------|-----|----------------------|-------------------|-----------|----------|---------------------------|------------|------------|------|
| 11-03 | Gp3 | g.chr7:18957525G>T   | Intron            | HDAC9     |          | histone deacetylase 9     | 16 (0.00)  | 21 (0.29)  | 0.76 |
| 11-03 | Gp3 | g.chr7:19033452G>A   | Intron            | HDAC9     |          | histone deacetylase 9     | 79 (0.00)  | 44 (0.34)  | 0.91 |
| 11-03 | Gp3 | g.chr2:242178111C>T  | Missense Mutation | HDLBP     | p.R901Q  | high density lipoprotein  | 42 (0.02)  | 33 (0.24)  | 0.65 |
| 11-03 | Gp3 | g.chr1:236719140G>A  | Silent            | HEATR1    | p.L1872L | HEAT repeat containing    | 53 (0.02)  | 34 (0.21)  | 0.55 |
| 11-03 | Gp3 | g.chr1:236719168G>A  | Silent            | HEATR1    | p.S1862S | HEAT repeat containing    | 41 (0.00)  | 32 (0.25)  | 0.67 |
| 11-03 | Gp3 | g.chr12:112677821G>A | Missense Mutation | HECTD4    | p.L1511F | HECT domain containir     | 47 (0.02)  | 44 (0.39)  | 1.03 |
| 11-03 | Gp3 | g.chr17:65146062G>T  | Missense Mutation | HELZ      | p.A799D  | helicase with zinc finger | 33 (0.00)  | 54 (0.22)  | 0.59 |
| 11-03 | Gp3 | g.chr9:100693459C>A  | Missense Mutation | HEMGN     | p.R73L   | hemogen                   | 49 (0.02)  | 67 (0.21)  | 0.56 |
| 11-03 | Gp3 | g.chr15:63967147G>A  | Missense Mutation | HERC1     | p.H2414Y | HECT and RLD domain       | 51 (0.00)  | 104 (0.16) | 0.44 |
| 11-03 | Gp3 | g.chr15:64048745G>T  | Missense Mutation | HERC1     | p.T475K  | HECT and RLD domain       | 16 (0.00)  | 19 (0.26)  | 0.70 |
| 11-03 | Gp3 | g.chr15:20618532C>A  | RNA               | HERC2P3   |          | hect domain and RLD 2     | 20 (0.00)  | 42 (0.33)  | 0.89 |
| 11-03 | Gp3 | g.chr4:89317188G>A   | Missense Mutation | HERC6     | p.G261R  | HECT and RLD domain       | 15 (0.00)  | 16 (0.31)  | 0.83 |
| 11-03 | Gp3 | g.chr7:35674992C>G   | Missense Mutation | HERPUD2   | p.A232P  | HERPUD family memb        | 41 (0.00)  | 49 (0.18)  | 0.49 |
| 11-03 | Gp3 | g.chr8:43014188G>T   | Splice Site       | HGSNAT    |          | heparan-alpha-glucosam    | 69 (0.01)  | 43 (0.16)  | 0.43 |
| 11-03 | Gp3 | g.chr9:99735141C>T   | Missense Mutation | HIATL2    | p.M66I   | hippocampus abundant      | 157 (0.00) | 40 (0.20)  | 0.53 |
| 11-03 | Gp3 | g.chr14:62187117G>A  | Missense Mutation | HIF1A     | p.R19Q   | hypoxia inducible factor  | 20 (0.00)  | 21 (0.43)  | 1.14 |
| 11-03 | Gp3 | g.chr7:75192347C>A   | Silent            | HIP1      | p.L304L  | huntingtin interacting pr | 37 (0.00)  | 21 (0.24)  | 0.63 |
| 11-03 | Gp3 | g.chr6:27114939C>T   | Missense Mutation | HIST1H2AH | p.A11V   | histone cluster 1, H2ah   | 34 (0.03)  | 33 (0.21)  | 0.57 |
| 11-03 | Gp3 | g.chr6:12161772C>T   | Silent            | HIVEP1    | p.D2196D | human immunodeficien      | 47 (0.00)  | 26 (0.31)  | 0.82 |
| 11-03 | Gp3 | g.chr6:143091630C>T  | Missense Mutation | HIVEP2    | p.G1416S | human immunodeficien      | 50 (0.00)  | 22 (0.23)  | 0.61 |
| 11-03 | Gp3 | g.chr6:143095304C>A  | Missense Mutation | HIVEP2    | p.C191F  | human immunodeficien      | 25 (0.00)  | 39 (0.23)  | 0.62 |
| 11-03 | Gp3 | g.chr21:38308775G>A  | Missense Mutation | HLCS      | p.R324C  | holocarboxylase synthet   | 41 (0.00)  | 33 (0.48)  | 1.29 |
| 11-03 | Gp3 | g.chr16:4556988G>A   | Missense Mutation | HMOX2     | p.G60D   | heme oxygenase (decyc     | 114 (0.01) | 149 (0.15) | 0.41 |
| 11-03 | Gp3 | g.chr17:73132267G>A  | Missense Mutation | HN1       | p.P86L   | hematological and neurc   | 25 (0.00)  | 43 (0.16)  | 0.43 |
| 11-03 | Gp3 | g.chr8:76476216C>T   | Missense Mutation | HNF4G     | p.P408L  | hepatocyte nuclear facto  | 16 (0.00)  | 21 (0.24)  | 0.63 |
| 11-03 | Gp3 | g.chr5:179043149G>T  | Silent            | HNRNPH1   | p.G426G  | heterogeneous nuclear r   | 28 (0.00)  | 64 (0.17)  | 0.46 |
| 11-03 | Gp3 | g.chr19:41807570G>A  | Missense Mutation | HNRNPUL1  | p.G550R  | heterogeneous nuclear r   | 67 (0.01)  | 34 (0.29)  | 0.78 |
| 11-03 | Gp3 | g.chr1:152187913C>A  | Missense Mutation | HRNR      | p.Q2064H | hornerin                  | 70 (0.00)  | 22 (0.41)  | 0.76 |
| 11-03 | Gp3 | g.chr17:14248897C>T  | Silent            | HS3ST3B1  | p.R369R  | heparan sulfate (glucosa  | 47 (0.00)  | 52 (0.35)  | 0.92 |
| 11-03 | Gp3 | g.chr1:162762515G>A  | Silent            | HSD17B7   | p.A34A   | hydroxysteroid (17-beta   | 36 (0.00)  | 30 (0.17)  | 0.44 |
| 11-03 | Gp3 | g.chr10:38654460G>A  | RNA               | HSD17B7P2 |          | hydroxysteroid (17-beta   | 68 (0.00)  | 21 (0.29)  | 0.76 |
| 11-03 | Gp3 | g.chr4:128725170C>A  | Missense Mutation | HSPA4L    | p.Q305K  | heat shock 70kDa protei   | 29 (0.00)  | 21 (0.33)  | 0.89 |
| 11-03 | Gp3 | g.chr11:113860424T>C | Missense Mutation | HTR3A     | p.L459P  | 5-hydroxytryptamine (ser  | 16 (0.00)  | 17 (0.35)  | 0.94 |
| 11-03 | Gp3 | g.chr10:124268264G>A | Silent            | HTRA1     | p.E366E  | HtrA serine peptidase 1   | 41 (0.02)  | 38 (0.37)  | 0.98 |
| 11-03 | Gp3 | g.chr4:3214302C>T    | Silent            | HTT       | p.L2214L | huntingtin                | 72 (0.00)  | 35 (0.14)  | 0.38 |

|       |     |                      |                   |          |          |                                 |            |            |      |
|-------|-----|----------------------|-------------------|----------|----------|---------------------------------|------------|------------|------|
| 11-03 | Gp3 | g.chr11:118926028C>A | Silent            | HYOU1    | p.T96T   | hypoxia up-regulated 1          | 27 (0.00)  | 19 (0.37)  | 0.98 |
| 11-03 | Gp3 | g.chr9:95040554G>A   | Nonsense Mutation | IARS     | p.R254*  | isoleucyl-tRNA synthetase       | 65 (0.00)  | 33 (0.15)  | 0.40 |
| 11-03 | Gp3 | g.chr1:220284255C>A  | Silent            | IARS2    | p.I413I  | isoleucyl-tRNA synthetase       | 19 (0.00)  | 22 (0.27)  | 0.73 |
| 11-03 | Gp3 | g.chr19:10385665G>T  | Missense Mutation | ICAM1    | p.D98Y   | intercellular adhesion molecule | 27 (0.00)  | 53 (0.17)  | 0.57 |
| 11-03 | Gp3 | g.chr15:78454047C>T  | Silent            | IDH3A    | p.T138T  | isocitrate dehydrogenase        | 33 (0.00)  | 42 (0.36)  | 0.95 |
| 11-03 | Gp3 | g.chr8:39785524C>T   | Silent            | IDO1     | p.S344S  | indoleamine 2,3-dioxygenase     | 24 (0.00)  | 34 (0.44)  | 1.18 |
| 11-03 | Gp3 | g.chr17:41165648G>T  | Silent            | IFI35    | p.G179G  | interferon-induced protein      | 22 (0.00)  | 26 (0.42)  | 1.13 |
| 11-03 | Gp3 | g.chr12:102796292C>A | Missense Mutation | IGF1     | p.R136M  | insulin-like growth factor      | 19 (0.00)  | 34 (0.35)  | 0.94 |
| 11-03 | Gp3 | g.chr12:102869459G>A | Missense Mutation | IGF1     | p.A45V   | insulin-like growth factor      | 46 (0.00)  | 34 (0.21)  | 0.55 |
| 11-03 | Gp3 | g.chr12:102869491C>T | Silent            | IGF1     | p.P34P   | insulin-like growth factor      | 29 (0.00)  | 22 (0.27)  | 0.73 |
| 11-03 | Gp3 | g.chr14:106109941C>T | RNA               | IGHG2    |          | immunoglobulin heavy chain      | 16 (0.00)  | 30 (0.43)  | 1.16 |
| 11-03 | Gp3 | g.chr14:106586176G>A | RNA               | IGHV3-13 |          | immunoglobulin heavy chain      | 71 (0.00)  | 35 (0.17)  | 0.46 |
| 11-03 | Gp3 | g.chr14:107013124G>A | RNA               | IGHV3-49 |          | immunoglobulin heavy chain      | 58 (0.00)  | 41 (0.17)  | 0.46 |
| 11-03 | Gp3 | g.chr2:89399430T>A   | RNA               | IGKV1-16 |          | immunoglobulin kappa chain      | 25 (0.00)  | 25 (0.20)  | 0.40 |
| 11-03 | Gp3 | g.chr22:22764540G>A  | RNA               | IGLV1-40 |          | immunoglobulin lambda chain     | 26 (0.00)  | 33 (0.21)  | 0.57 |
| 11-03 | Gp3 | g.chr22:23214078G>A  | RNA               | IGLV4-3  |          | immunoglobulin lambda chain     | 23 (0.00)  | 30 (0.20)  | 0.53 |
| 11-03 | Gp3 | g.chr1:206651620C>T  | Silent            | IKBKE    | p.V310V  | inhibitor of kappa light chain  | 29 (0.00)  | 41 (0.24)  | 0.40 |
| 11-03 | Gp3 | g.chr3:136699331C>T  | Missense Mutation | IL20RB   | p.P38S   | interleukin 20 receptor         | 38 (0.00)  | 48 (0.29)  | 0.78 |
| 11-03 | Gp3 | g.chr7:22768374C>A   | Missense Mutation | IL6      | p.N91K   | interleukin 6                   | 50 (0.00)  | 46 (0.22)  | 0.58 |
| 11-03 | Gp3 | g.chr1:153640102T>A  | Missense Mutation | ILF2     | p.Y108F  | interleukin enhancer binding    | 101 (0.01) | 133 (0.27) | 0.51 |
| 11-03 | Gp3 | g.chr19:10799921C>A  | Missense Mutation | ILF3     | p.S873Y  | interleukin enhancer binding    | 48 (0.00)  | 37 (0.14)  | 0.45 |
| 11-03 | Gp3 | g.chr7:128038643C>T  | Missense Mutation | IMPDH1   | p.C210Y  | IMP (inosine 5'-monophosphate)  | 27 (0.00)  | 25 (0.20)  | 0.53 |
| 11-03 | Gp3 | g.chr3:100949935C>A  | Silent            | IMPG2    | p.V1096V | interphotoreceptor matrix       | 29 (0.00)  | 22 (0.23)  | 0.61 |
| 11-03 | Gp3 | g.chr4:142974222A>T  | Intron            | INPP4B   |          | inositol polyphosphate          | 76 (0.00)  | 29 (0.17)  | 0.46 |
| 11-03 | Gp3 | g.chr4:142996512C>T  | Intron            | INPP4B   |          | inositol polyphosphate          | 32 (0.00)  | 18 (0.28)  | 0.74 |
| 11-03 | Gp3 | g.chr4:143204099A>G  | Intron            | INPP4B   |          | inositol polyphosphate          | 54 (0.00)  | 19 (0.32)  | 0.84 |
| 11-03 | Gp3 | g.chr4:143211042C>T  | Intron            | INPP4B   |          | inositol polyphosphate          | 24 (0.00)  | 38 (0.16)  | 0.42 |
| 11-03 | Gp3 | g.chr4:143233037C>A  | Intron            | INPP4B   |          | inositol polyphosphate          | 20 (0.00)  | 41 (0.46)  | 1.24 |
| 11-03 | Gp3 | g.chr4:143234988C>A  | Intron            | INPP4B   |          | inositol polyphosphate          | 32 (0.00)  | 34 (0.26)  | 0.71 |
| 11-03 | Gp3 | g.chr4:143257329C>A  | Intron            | INPP4B   |          | inositol polyphosphate          | 23 (0.00)  | 23 (0.26)  | 0.70 |
| 11-03 | Gp3 | g.chr4:143275514G>A  | Intron            | INPP4B   |          | inositol polyphosphate          | 27 (0.00)  | 36 (0.17)  | 0.44 |
| 11-03 | Gp3 | g.chr4:143285941C>G  | Intron            | INPP4B   |          | inositol polyphosphate          | 50 (0.00)  | 23 (0.30)  | 0.81 |
| 11-03 | Gp3 | g.chr4:143296588G>T  | Intron            | INPP4B   |          | inositol polyphosphate          | 34 (0.00)  | 32 (0.16)  | 0.42 |
| 11-03 | Gp3 | g.chr4:143322263C>A  | Intron            | INPP4B   |          | inositol polyphosphate          | 53 (0.00)  | 52 (0.17)  | 0.46 |
| 11-03 | Gp3 | g.chr4:143332678A>T  | Intron            | INPP4B   |          | inositol polyphosphate          | 46 (0.00)  | 43 (0.16)  | 0.43 |

|       |     |                     |                   |            |          |                                    |           |      |
|-------|-----|---------------------|-------------------|------------|----------|------------------------------------|-----------|------|
| 11-03 | Gp3 | g.chr4:143402953G>T | Intron            | INPP4B     |          | inositol polyphosphate-43 (0.00)   | 54 (0.15) | 0.40 |
| 11-03 | Gp3 | g.chr4:143511232G>A | Intron            | INPP4B     |          | inositol polyphosphate-88 (0.00)   | 56 (0.20) | 0.52 |
| 11-03 | Gp3 | g.chr4:143527454C>T | Intron            | INPP4B     |          | inositol polyphosphate-24 (0.00)   | 35 (0.20) | 0.53 |
| 11-03 | Gp3 | g.chr4:143544206G>A | Intron            | INPP4B     |          | inositol polyphosphate-35 (0.00)   | 26 (0.42) | 1.13 |
| 11-03 | Gp3 | g.chr4:143582359C>A | Intron            | INPP4B     |          | inositol polyphosphate-59 (0.00)   | 27 (0.48) | 1.28 |
| 11-03 | Gp3 | g.chr4:143582360T>A | Intron            | INPP4B     |          | inositol polyphosphate-57 (0.00)   | 28 (0.43) | 1.14 |
| 11-03 | Gp3 | g.chr4:143587928C>T | Intron            | INPP4B     |          | inositol polyphosphate-26 (0.00)   | 35 (0.14) | 0.38 |
| 11-03 | Gp3 | g.chr4:143645624C>T | Intron            | INPP4B     |          | inositol polyphosphate-30 (0.00)   | 38 (0.37) | 0.98 |
| 11-03 | Gp3 | g.chr4:143673948C>A | Intron            | INPP4B     |          | inositol polyphosphate-38 (0.00)   | 29 (0.21) | 0.55 |
| 11-03 | Gp3 | g.chr4:143688963G>A | Intron            | INPP4B     |          | inositol polyphosphate-46 (0.00)   | 37 (0.16) | 0.43 |
| 11-03 | Gp3 | g.chr4:143735143G>A | Intron            | INPP4B     |          | inositol polyphosphate-78 (0.00)   | 53 (0.28) | 0.75 |
| 11-03 | Gp3 | g.chr4:143753248G>A | Intron            | INPP4B     |          | inositol polyphosphate-69 (0.00)   | 51 (0.16) | 0.42 |
| 11-03 | Gp3 | g.chr4:143765852C>T | Intron            | INPP4B     |          | inositol polyphosphate-56 (0.00)   | 61 (0.26) | 0.70 |
| 11-03 | Gp3 | g.chr17:60002380C>T | Missense Mutation | INTS2      | p.S125N  | integrator complex subu99 (0.00)   | 48 (0.23) | 0.61 |
| 11-03 | Gp3 | g.chr11:77649811C>A | Missense Mutation | INTS4      | p.G351C  | integrator complex subu39 (0.00)   | 43 (0.16) | 0.43 |
| 11-03 | Gp3 | g.chr11:9466685G>A  | Missense Mutation | IPO7       | p.A1021T | importin 7 26 (0.00)               | 14 (0.36) | 0.95 |
| 11-03 | Gp3 | g.chr1:156505021C>T | Silent            | IQGAP3     | p.V1147V | IQ motif containing GT171 (0.00)   | 46 (0.24) | 0.45 |
| 11-03 | Gp3 | g.chr3:10280486C>A  | Missense Mutation | IRAK2      | p.L510I  | interleukin-1 receptor-a:19 (0.00) | 24 (0.21) | 0.56 |
| 11-03 | Gp3 | g.chr16:71949619G>T | Nonsense Mutation | IST1       | p.E26*   | increased sodium toleranc37 (0.00) | 34 (0.26) | 0.71 |
| 11-03 | Gp3 | g.chr3:128813884G>A | Missense Mutation | ISY1-RAB43 | p.T327I  | ISY1-RAB43 readthrou16 (0.00)      | 22 (0.23) | 0.61 |
| 11-03 | Gp3 | g.chr5:52344287G>T  | Missense Mutation | ITGA2      | p.S161I  | integrin, alpha 2 (CD49)45 (0.00)  | 27 (0.41) | 1.09 |
| 11-03 | Gp3 | g.chr16:30531250C>A | Missense Mutation | ITGAL      | p.L1101M | integrin, alpha L (antige56 (0.00) | 32 (0.19) | 0.50 |
| 11-03 | Gp3 | g.chr3:4669545C>G   | Missense Mutation | ITPR1      | p.L88V   | inositol 1,4,5-trisphosph65 (0.00) | 39 (0.59) | 1.04 |
| 11-03 | Gp3 | g.chr4:6051560G>A   | Missense Mutation | JAKMIP1    | p.L650F  | janus kinase and microtr121 (0.01) | 82 (0.22) | 0.59 |
| 11-03 | Gp3 | g.chr6:15501467G>A  | Missense Mutation | JARID2     | p.G759R  | jumonji, AT rich interac56 (0.00)  | 42 (0.40) | 1.08 |
| 11-03 | Gp3 | g.chr10:64975313G>A | Splice Site       | JMJD1C     | p.H274H  | jumonji domain contain20 (0.00)    | 40 (0.20) | 0.53 |
| 11-03 | Gp3 | g.chr1:6142328C>A   | Missense Mutation | KCNAB2     | p.A92D   | potassium voltage-gated26 (0.00)   | 15 (0.33) | 0.89 |
| 11-03 | Gp3 | g.chr17:7828458G>A  | Silent            | KCNAB3     | p.D194D  | potassium voltage-gated37 (0.03)   | 57 (0.44) | 0.55 |
| 11-03 | Gp3 | g.chr14:63174581C>A | Missense Mutation | KCNH5      | p.S871I  | potassium voltage-gated35 (0.00)   | 21 (0.33) | 0.89 |
| 11-03 | Gp3 | g.chr11:77884887G>A | Silent            | KCTD21     | p.I238I  | potassium channel tetra21 (0.00)   | 43 (0.21) | 0.56 |
| 11-03 | Gp3 | g.chr1:23381623C>G  | Missense Mutation | KDM1A      | p.F284L  | lysine (K)-specific demε17 (0.00)  | 42 (0.31) | 0.83 |
| 11-03 | Gp3 | g.chr9:2829790G>T   | Missense Mutation | KIAA0020   | p.T279K  | KIAA0020 31 (0.00)                 | 32 (0.19) | 0.50 |
| 11-03 | Gp3 | g.chr1:155887340A>T | Missense Mutation | KIAA0907   | p.F464I  | KIAA0907 17 (0.00)                 | 25 (0.24) | 0.64 |
| 11-03 | Gp3 | g.chr6:84895095G>C  | Silent            | KIAA1009   | p.A491A  | 72 (0.00)                          | 17 (0.29) | 0.38 |
| 11-03 | Gp3 | g.chr5:175774676C>G | Missense Mutation | KIAA1191   | p.G282A  | KIAA1191 22 (0.00)                 | 48 (0.15) | 0.39 |

|       |     |                      |                   |             |          |                           |           |            |      |
|-------|-----|----------------------|-------------------|-------------|----------|---------------------------|-----------|------------|------|
| 11-03 | Gp3 | g.chr15:81181900A>T  | Silent            | KIAA1199    | p.P351P  |                           | 19 (0.00) | 22 (0.45)  | 1.21 |
| 11-03 | Gp3 | g.chr10:70768648G>T  | Missense Mutation | KIAA1279    | p.G281C  | KIAA1279                  | 41 (0.02) | 26 (0.31)  | 0.82 |
| 11-03 | Gp3 | g.chr18:34802045G>A  | Missense Mutation | KIAA1328    | p.R526H  | KIAA1328                  | 36 (0.00) | 31 (0.19)  | 0.52 |
| 11-03 | Gp3 | g.chr1:33234264G>A   | Silent            | KIAA1522    | p.T99T   | KIAA1522                  | 43 (0.00) | 37 (0.16)  | 0.43 |
| 11-03 | Gp3 | g.chr1:180885981G>A  | Missense Mutation | KIAA1614    | p.V248M  | KIAA1614                  | 72 (0.00) | 37 (0.22)  | 0.58 |
| 11-03 | Gp3 | g.chr22:25566876G>A  | Silent            | KIAA1671    | p.T1540T | KIAA1671                  | 27 (0.00) | 22 (0.23)  | 0.61 |
| 11-03 | Gp3 | g.chr9:5922328G>A    | Missense Mutation | KIAA2026    | p.P1223L | KIAA2026                  | 48 (0.00) | 27 (0.33)  | 0.89 |
| 11-03 | Gp3 | g.chr6:17764842C>T   | Silent            | KIF13A      | p.S1639S | kinesin family member     | 27 (0.00) | 44 (0.18)  | 0.48 |
| 11-03 | Gp3 | g.chr1:10394623C>A   | Silent            | KIF1B       | p.I990I  | kinesin family member     | 56 (0.00) | 27 (0.19)  | 0.63 |
| 11-03 | Gp3 | g.chr1:10407826C>A   | Missense Mutation | KIF1B       | p.P1269T | kinesin family member     | 20 (0.00) | 15 (0.67)  | 2.27 |
| 11-03 | Gp3 | g.chr1:10434420G>T   | Nonsense Mutation | KIF1B       | p.E1665* | kinesin family member     | 79 (0.00) | 113 (0.19) | 0.63 |
| 11-03 | Gp3 | g.chr13:33635004C>T  | Silent            | KL          | p.S596S  | klotho                    | 50 (0.00) | 25 (0.36)  | 0.41 |
| 11-03 | Gp3 | g.chr10:3825048A>T   | Intron            | KLF6        |          | Kruppel-like factor 6     | 99 (0.00) | 45 (0.16)  | 0.41 |
| 11-03 | Gp3 | g.chr17:39998197C>T  | Missense Mutation | KLHL10      | p.P106L  | kelch-like family memb    | 39 (0.00) | 34 (0.24)  | 0.63 |
| 11-03 | Gp3 | g.chr19:51518726C>T  | Missense Mutation | KLK10       | p.V209I  | kallikrein-related peptid | 15 (0.00) | 51 (0.31)  | 1.11 |
| 11-03 | Gp3 | g.chr11:118343281C>T | Silent            | KMT2A       | p.S469S  | lysine (K)-specific meth  | 16 (0.00) | 34 (0.15)  | 0.39 |
| 11-03 | Gp3 | g.chr12:49420638C>T  | Silent            | KMT2D       | p.E5037E | lysine (K)-specific meth  | 36 (0.00) | 21 (0.33)  | 0.89 |
| 11-03 | Gp3 | g.chr7:104752545G>T  | Nonsense Mutation | KMT2E       | p.E1448* | lysine (K)-specific meth  | 69 (0.00) | 61 (0.16)  | 0.44 |
| 11-03 | Gp3 | g.chr7:98771378C>T   | Missense Mutation | KPNA7       | p.D502N  | karyopherin alpha 7 (im   | 48 (0.02) | 37 (0.16)  | 0.43 |
| 11-03 | Gp3 | g.chr12:52941666G>A  | Missense Mutation | KRT71       | p.S360L  | keratin 71                | 52 (0.00) | 17 (0.53)  | 0.43 |
| 11-03 | Gp3 | g.chr12:117968797G>A | Missense Mutation | KSR2        | p.T584M  | kinase suppressor of ras  | 28 (0.00) | 28 (0.18)  | 0.48 |
| 11-03 | Gp3 | g.chr19:54868215G>C  | Silent            | LAIR1       | p.S156S  | leukocyte-associated im   | 16 (0.00) | 11 (0.45)  | 1.21 |
| 11-03 | Gp3 | g.chr7:107626705C>A  | Missense Mutation | LAMB1       | p.G176V  | laminin, beta 1           | 41 (0.00) | 41 (0.27)  | 0.72 |
| 11-03 | Gp3 | g.chr7:107745061G>T  | Missense Mutation | LAMB4       | p.H292N  | laminin, beta 4           | 83 (0.00) | 66 (0.15)  | 0.40 |
| 11-03 | Gp3 | g.chr1:183085751T>A  | Nonsense Mutation | LAMC1       | p.C456*  | laminin, gamma 1 (form    | 26 (0.00) | 35 (0.14)  | 0.38 |
| 11-03 | Gp3 | g.chr4:129019426C>T  | Silent            | LARP1B      | p.L252L  | La ribonucleoprotein do   | 24 (0.00) | 24 (0.29)  | 0.78 |
| 11-03 | Gp3 | g.chr16:25176017C>G  | Missense Mutation | LCMT1       | p.A223G  | leucine carboxyl methyl   | 93 (0.01) | 67 (0.19)  | 0.52 |
| 11-03 | Gp3 | g.chr19:40197949A>T  | Missense Mutation | LGALS14     | p.E104V  | lectin, galactoside-bindi | 35 (0.00) | 32 (0.19)  | 0.50 |
| 11-03 | Gp3 | g.chr17:25975930C>A  | Nonsense Mutation | LGALS9      | p.Y298*  | lectin, galactoside-bindi | 28 (0.00) | 24 (0.25)  | 0.67 |
| 11-03 | Gp3 | g.chr1:202269980G>T  | Silent            | LGR6        | p.G263G  | leucine-rich repeat cont  | 89 (0.01) | 38 (0.16)  | 0.42 |
| 11-03 | Gp3 | g.chr4:83905425C>G   | Missense Mutation | LIN54       | p.R191S  | lin-54 DREAM MuvB c       | 17 (0.00) | 22 (0.41)  | 1.09 |
| 11-03 | Gp3 | g.chr22:47857547T>C  | Silent            | LL22NC03-75 | p.R51R   |                           | 50 (0.02) | 34 (0.15)  | 0.39 |
| 11-03 | Gp3 | g.chr17:18145232G>A  | Missense Mutation | LLGL1       | p.R934H  | lethal giant larvae homo  | 39 (0.00) | 27 (0.19)  | 0.49 |
| 11-03 | Gp3 | g.chr3:100174762C>T  | Missense Mutation | LNP1        | p.P177S  | leukemia NUP98 fusion     | 30 (0.00) | 27 (0.63)  | 1.68 |
| 11-03 | Gp3 | g.chr5:96320838T>C   | Silent            | LNPEP       | p.C305C  | leucyl/cystinyl aminope   | 25 (0.00) | 36 (0.17)  | 0.44 |

|       |     |                     |                   |            |          |                                     |            |           |      |
|-------|-----|---------------------|-------------------|------------|----------|-------------------------------------|------------|-----------|------|
| 11-03 | Gp3 | g.chr9:113704191G>T | Silent            | LPAR1      | p.A101A  | lysophosphatidic acid re26 (0.00)   | 20 (0.35)  | 0.93      |      |
| 11-03 | Gp3 | g.chr16:55562423T>C | Missense Mutation | LPCAT2     | p.F149S  | lysophosphatidylcholine 101 (0.00)  | 55 (0.22)  | 0.58      |      |
| 11-03 | Gp3 | g.chr2:11959611G>A  | Splice Site       | LPIN1      | p.E496K  | lipin 1                             | 57 (0.00)  | 47 (0.21) | 0.57 |
| 11-03 | Gp3 | g.chr2:11959698T>A  | Missense Mutation | LPIN1      | p.Y525N  | lipin 1                             | 53 (0.00)  | 65 (0.15) | 0.41 |
| 11-03 | Gp3 | g.chr8:105503697A>T | Missense Mutation | LRP12      | p.M595K  | low density lipoprotein 134 (0.00)  | 60 (0.15)  | 0.40      |      |
| 11-03 | Gp3 | g.chr2:141055383G>A | Nonsense Mutation | LRP1B      | p.Q4321* | low density lipoprotein 143 (0.00)  | 132 (0.54) | 1.43      |      |
| 11-03 | Gp3 | g.chr2:141116486G>A | Missense Mutation | LRP1B      | p.H3721Y | low density lipoprotein 153 (0.00)  | 31 (0.29)  | 0.77      |      |
| 11-03 | Gp3 | g.chr12:7015658C>A  | Missense Mutation | LRRC23     | p.P108T  | leucine rich repeat conta 16 (0.00) | 102 (0.34) | 0.92      |      |
| 11-03 | Gp3 | g.chr9:114371360T>A | RNA               | LRRC37A5P  |          | leucine rich repeat conta 46 (0.00) | 45 (0.24)  | 0.65      |      |
| 11-03 | Gp3 | g.chr2:160755259C>G | Missense Mutation | LY75-CD302 | p.A136P  | LY75-CD302 readthrou 35 (0.00)      | 13 (0.62)  | 0.84      |      |
| 11-03 | Gp3 | g.chr1:39927653C>A  | Missense Mutation | MACF1      | p.H7107N | microtubule-actin crossl 59 (0.02)  | 58 (0.22)  | 0.60      |      |
| 11-03 | Gp3 | g.chr11:47307122G>A | Silent            | MADD       | p.G844G  | MAP-kinase activating 45 (0.00)     | 26 (0.23)  | 0.62      |      |
| 11-03 | Gp3 | g.chrX:151092955G>A | Silent            | MAGEA4     | p.L273L  | melanoma antigen famil 21 (0.00)    | 49 (0.24)  | 0.41      |      |
| 11-03 | Gp3 | g.chr7:77671238G>T  | Intron            | MAGI2      |          | membrane associated gu 84 (0.00)    | 34 (0.15)  | 0.39      |      |
| 11-03 | Gp3 | g.chr7:77855907G>A  | Intron            | MAGI2      |          | membrane associated gu 57 (0.00)    | 27 (0.26)  | 0.69      |      |
| 11-03 | Gp3 | g.chr7:77889673G>A  | Intron            | MAGI2      |          | membrane associated gu 44 (0.00)    | 27 (0.33)  | 0.89      |      |
| 11-03 | Gp3 | g.chr7:77925411G>A  | Intron            | MAGI2      |          | membrane associated gu 24 (0.00)    | 31 (0.16)  | 0.43      |      |
| 11-03 | Gp3 | g.chr7:77930848T>A  | Intron            | MAGI2      |          | membrane associated gu 52 (0.00)    | 47 (0.19)  | 0.51      |      |
| 11-03 | Gp3 | g.chr7:77960442C>A  | Intron            | MAGI2      |          | membrane associated gu 20 (0.00)    | 32 (0.16)  | 0.42      |      |
| 11-03 | Gp3 | g.chr7:77984851C>A  | Intron            | MAGI2      |          | membrane associated gu 50 (0.00)    | 46 (0.15)  | 0.41      |      |
| 11-03 | Gp3 | g.chr7:78039374G>T  | Intron            | MAGI2      |          | membrane associated gu 48 (0.00)    | 30 (0.20)  | 0.53      |      |
| 11-03 | Gp3 | g.chr7:78062938C>T  | Intron            | MAGI2      |          | membrane associated gu 33 (0.00)    | 37 (0.16)  | 0.43      |      |
| 11-03 | Gp3 | g.chr7:78068937G>A  | Intron            | MAGI2      |          | membrane associated gu 25 (0.00)    | 34 (0.26)  | 0.71      |      |
| 11-03 | Gp3 | g.chr7:78177739A>G  | Intron            | MAGI2      |          | membrane associated gu 24 (0.00)    | 53 (0.17)  | 0.45      |      |
| 11-03 | Gp3 | g.chr7:78240792C>A  | Intron            | MAGI2      |          | membrane associated gu 90 (0.00)    | 67 (0.24)  | 0.64      |      |
| 11-03 | Gp3 | g.chr7:78598643C>G  | Intron            | MAGI2      |          | membrane associated gu 23 (0.00)    | 41 (0.20)  | 0.52      |      |
| 11-03 | Gp3 | g.chr7:78614029C>T  | Intron            | MAGI2      |          | membrane associated gu 27 (0.00)    | 36 (0.28)  | 0.74      |      |
| 11-03 | Gp3 | g.chr7:78632328G>C  | Intron            | MAGI2      |          | membrane associated gu 27 (0.00)    | 26 (0.19)  | 0.51      |      |
| 11-03 | Gp3 | g.chr7:78832158C>G  | Intron            | MAGI2      |          | membrane associated gu 23 (0.00)    | 14 (0.43)  | 1.14      |      |
| 11-03 | Gp3 | g.chr7:78940208C>G  | Intron            | MAGI2      |          | membrane associated gu 51 (0.00)    | 31 (0.23)  | 0.60      |      |
| 11-03 | Gp3 | g.chr7:78951214C>T  | Intron            | MAGI2      |          | membrane associated gu 38 (0.00)    | 30 (0.20)  | 0.53      |      |
| 11-03 | Gp3 | g.chr7:78976874C>T  | Intron            | MAGI2      |          | membrane associated gu 55 (0.00)    | 23 (0.26)  | 0.70      |      |
| 11-03 | Gp3 | g.chr7:79044488G>C  | Intron            | MAGI2      |          | membrane associated gu 33 (0.00)    | 35 (0.37)  | 0.99      |      |
| 11-03 | Gp3 | g.chr5:71495089G>A  | Silent            | MAP1B      | p.V1969V | microtubule-associated j 26 (0.00)  | 18 (0.39)  | 1.04      |      |
| 11-03 | Gp3 | g.chr2:210518034G>A | Missense Mutation | MAP2       | p.G47E   | microtubule-associated j 20 (0.00)  | 14 (0.36)  | 0.95      |      |



|       |     |                      |                   |             |          |                           |            |            |      |
|-------|-----|----------------------|-------------------|-------------|----------|---------------------------|------------|------------|------|
| 11-03 | Gp3 | g.chr17:43345070G>A  | RNA               | MAP3K14-AS1 |          | MAP3K14 antisense RN      | 122 (0.00) | 64 (0.19)  | 0.50 |
| 11-03 | Gp3 | g.chr1:85498409T>C   | Silent            | MCOLN3      | p.E234E  | mucolipin 3               | 78 (0.01)  | 53 (0.28)  | 0.46 |
| 11-03 | Gp3 | g.chr17:37596676C>A  | Missense Mutation | MED1        | p.C121F  | mediator complex subu     | 41 (0.00)  | 46 (0.22)  | 0.58 |
| 11-03 | Gp3 | g.chr3:151067850G>A  | Missense Mutation | MED12L      | p.E717K  | mediator complex subu     | 17 (0.06)  | 52 (0.17)  | 0.46 |
| 11-03 | Gp3 | g.chr22:20921090C>A  | Missense Mutation | MED15       | p.P343T  | mediator complex subu     | 55 (0.00)  | 50 (0.18)  | 0.48 |
| 11-03 | Gp3 | g.chr15:100252655C>A | Missense Mutation | MEF2A       | p.S391R  | myocyte enhancer facto    | 31 (0.00)  | 17 (0.35)  | 0.94 |
| 11-03 | Gp3 | g.chr5:88047697C>G   | Missense Mutation | MEF2C       | p.R187P  | myocyte enhancer facto    | 96 (0.00)  | 74 (0.20)  | 0.54 |
| 11-03 | Gp3 | g.chr1:156452415C>A  | Silent            | MEF2D       | p.R24R   | myocyte enhancer facto    | 38 (0.00)  | 40 (0.20)  | 0.53 |
| 11-03 | Gp3 | g.chr2:112754930C>T  | Missense Mutation | MERTK       | p.P494L  | MER proto-oncogene, ty    | 45 (0.00)  | 29 (0.24)  | 0.64 |
| 11-03 | Gp3 | g.chr7:116380975C>A  | Missense Mutation | MET         | p.P533T  | MET proto-oncogene, r     | 46 (0.02)  | 37 (0.32)  | 0.86 |
| 11-03 | Gp3 | g.chr1:170135783C>T  | Silent            | METTTL11B   | p.N157N  | methyltransferase like 1  | 103 (0.00) | 32 (0.16)  | 0.42 |
| 11-03 | Gp3 | g.chr12:31814999G>T  | Nonsense Mutation | METTTL20    | p.G38*   | methyltransferase like 2  | 26 (0.00)  | 17 (0.29)  | 0.78 |
| 11-03 | Gp3 | g.chr18:2554824C>T   | Missense Mutation | METTTL4     | p.D225N  | methyltransferase like 4  | 38 (0.00)  | 13 (0.54)  | 1.44 |
| 11-03 | Gp3 | g.chr17:8701456G>T   | Nonsense Mutation | MFSD6L      | p.S328*  | major facilitator superfa | 19 (0.00)  | 17 (0.29)  | 0.78 |
| 11-03 | Gp3 | g.chr15:42021542G>A  | Missense Mutation | MGA         | p.A1280T | MGA, MAX dimerizati       | 48 (0.00)  | 41 (0.32)  | 0.61 |
| 11-03 | Gp3 | g.chr7:141731570G>A  | Missense Mutation | MGAM        | p.V521I  | maltase-glucoamylase (    | 42 (0.02)  | 52 (0.42)  | 0.65 |
| 11-03 | Gp3 | g.chr7:141734634T>A  | Missense Mutation | MGAM        | p.I651N  | maltase-glucoamylase (    | 32 (0.00)  | 17 (0.29)  | 0.45 |
| 11-03 | Gp3 | g.chr10:103558758C>A | Silent            | MGEA5       | p.A550A  | meningioma expressed      | 19 (0.00)  | 30 (0.17)  | 0.44 |
| 11-03 | Gp3 | g.chr16:14334189T>A  | Silent            | MKL2        | p.I309I  | MKL/myocardin-like 2      | 22 (0.00)  | 23 (0.26)  | 0.70 |
| 11-03 | Gp3 | g.chr1:233489677G>A  | Missense Mutation | MLK4        | p.E371K  |                           | 29 (0.00)  | 42 (0.38)  | 1.02 |
| 11-03 | Gp3 | g.chr6:168276110G>A  | Missense Mutation | MLLT4       | p.R225Q  | myeloid/lymphoid or mi    | 109 (0.01) | 134 (0.16) | 0.42 |
| 11-03 | Gp3 | g.chr1:158813860C>T  | Missense Mutation | MNDA        | p.P173L  | myeloid cell nuclear dif  | 44 (0.00)  | 85 (0.14)  | 0.38 |
| 11-03 | Gp3 | g.chr5:52397259C>G   | Missense Mutation | MOCS2       | p.V103L  | molybdenum cofactor sy    | 58 (0.00)  | 30 (0.30)  | 0.80 |
| 11-03 | Gp3 | g.chr22:31333815C>T  | Silent            | MORC2       | p.K452K  | MORC family CW-type 50    | (0.00)     | 23 (0.39)  | 1.04 |
| 11-03 | Gp3 | g.chr22:31336790G>T  | Missense Mutation | MORC2       | p.R287S  | MORC family CW-type 17    | (0.00)     | 19 (0.32)  | 0.84 |
| 11-03 | Gp3 | g.chr9:13190278C>A   | Missense Mutation | MPDZ        | p.E663D  | multiple PDZ domain p     | 60 (0.00)  | 41 (0.15)  | 0.39 |
| 11-03 | Gp3 | g.chr11:18195323G>A  | Missense Mutation | MRGPRX4     | p.E174K  | MAS-related GPR, men      | 32 (0.00)  | 20 (0.25)  | 0.67 |
| 11-03 | Gp3 | g.chr5:71533896C>A   | Missense Mutation | MRPS27      | p.R114M  | mitochondrial ribosoma    | 50 (0.00)  | 30 (0.30)  | 0.80 |
| 11-03 | Gp3 | g.chr5:71533897T>A   | Missense Mutation | MRPS27      | p.R114W  | mitochondrial ribosoma    | 49 (0.00)  | 31 (0.23)  | 0.60 |
| 11-03 | Gp3 | g.chr2:42909679G>T   | Nonsense Mutation | MTA3        | p.E281*  | metastasis associated 1   | 127 (0.00) | 19 (0.32)  | 0.84 |
| 11-03 | Gp3 | g.chr6:151209016G>A  | Missense Mutation | MTHFD1L     | p.G227R  | methylenetetrahydrofol    | 27 (0.00)  | 52 (0.44)  | 1.18 |
| 11-03 | Gp3 | g.chr2:74438397G>A   | Missense Mutation | MTHFD2      | p.D248N  | methylenetetrahydrofol    | 64 (0.00)  | 40 (0.15)  | 0.40 |
| 11-03 | Gp3 | g.chr2:55464449G>T   | Silent            | MTIF2       | p.T662T  | mitochondrial translati   | 48 (0.00)  | 24 (0.38)  | 1.00 |
| 11-03 | Gp3 | g.chr1:149904180C>A  | Missense Mutation | MTMR11      | p.G271V  | myotubularin related pr   | 35 (0.00)  | 53 (0.25)  | 0.65 |
| 11-03 | Gp3 | g.chr1:237001875C>A  | Silent            | MTR         | p.V497V  | 5-methyltetrahydrofolat   | 31 (0.00)  | 41 (0.17)  | 0.46 |

|       |     |                      |                   |        |           |                                       |            |            |      |
|-------|-----|----------------------|-------------------|--------|-----------|---------------------------------------|------------|------------|------|
| 11-03 | Gp3 | g.chr7:100636680C>A  | Missense Mutation | MUC12  | p.H1089N  | mucin 12, cell surface a:             | 79 (0.01)  | 131 (0.16) | 0.43 |
| 11-03 | Gp3 | g.chr19:9033240G>A   | Missense Mutation | MUC16  | p.A12129V | mucin 16, cell surface a:             | 22 (0.00)  | 18 (0.28)  | 0.74 |
| 11-03 | Gp3 | g.chr19:9049788G>A   | Missense Mutation | MUC16  | p.P10615S | mucin 16, cell surface a:             | 83 (0.00)  | 34 (0.24)  | 0.63 |
| 11-03 | Gp3 | g.chr19:9071033G>T   | Silent            | MUC16  | p.I5471I  | mucin 16, cell surface a:             | 45 (0.00)  | 52 (0.15)  | 0.41 |
| 11-03 | Gp3 | g.chr19:9072566C>T   | Silent            | MUC16  | p.L4960L  | mucin 16, cell surface a:             | 91 (0.00)  | 51 (0.25)  | 0.68 |
| 11-03 | Gp3 | g.chr19:9076571T>A   | Missense Mutation | MUC16  | p.L3625F  | mucin 16, cell surface a:             | 16 (0.00)  | 21 (0.38)  | 1.02 |
| 11-03 | Gp3 | g.chr11:1093667C>T   | Missense Mutation | MUC2   | p.T1829I  | mucin 2, oligomeric mu                | 26 (0.00)  | 35 (0.14)  | 0.38 |
| 11-03 | Gp3 | g.chr3:195484146T>C  | Missense Mutation | MUC4   | p.I778V   | mucin 4, cell surface ass             | 31 (0.00)  | 16 (0.31)  | 0.83 |
| 11-03 | Gp3 | g.chr17:10416024C>T  | Missense Mutation | MYH1   | p.D328N   | myosin, heavy chain 1, $\epsilon$     | 44 (0.00)  | 33 (0.15)  | 0.40 |
| 11-03 | Gp3 | g.chr17:8452049G>A   | Missense Mutation | MYH10  | p.P316S   | myosin, heavy chain 10, $\beta$       | 37 (0.00)  | 29 (0.31)  | 0.39 |
| 11-03 | Gp3 | g.chr17:10442542C>A  | Missense Mutation | MYH2   | p.A466S   | myosin, heavy chain 2, $\delta$       | 32 (0.00)  | 45 (0.36)  | 0.95 |
| 11-03 | Gp3 | g.chr5:16694657C>A   | Missense Mutation | MYO10  | p.R1208L  | myosin X                              | 55 (0.00)  | 34 (0.15)  | 0.39 |
| 11-03 | Gp3 | g.chr5:16694659G>A   | Silent            | MYO10  | p.F1207F  | myosin X                              | 51 (0.00)  | 30 (0.17)  | 0.44 |
| 11-03 | Gp3 | g.chr12:57430556C>A  | Splice Site       | MYO1A  | p.K758N   | myosin IA                             | 64 (0.00)  | 44 (0.18)  | 0.48 |
| 11-03 | Gp3 | g.chr17:31075962G>A  | Silent            | MYO1D  | p.G422G   | myosin ID                             | 50 (0.00)  | 30 (0.20)  | 0.53 |
| 11-03 | Gp3 | g.chr15:59510108G>A  | Silent            | MYO1E  | p.V363V   | myosin IE                             | 69 (0.01)  | 41 (0.20)  | 0.52 |
| 11-03 | Gp3 | g.chr10:26446335G>T  | Missense Mutation | MYO3A  | p.D964Y   | myosin IIIA                           | 32 (0.00)  | 22 (0.50)  | 1.33 |
| 11-03 | Gp3 | g.chr1:24421939G>A   | Silent            | MYOM3  | p.I261I   | myomesin 3                            | 40 (0.00)  | 45 (0.18)  | 0.47 |
| 11-03 | Gp3 | g.chr5:137222942G>A  | Silent            | MYOT   | p.R340R   | myotilin                              | 17 (0.00)  | 17 (0.29)  | 0.78 |
| 11-03 | Gp3 | g.chr4:120107209C>A  | Missense Mutation | MYOZ2  | p.P217T   | myozenin 2                            | 16 (0.00)  | 16 (0.31)  | 0.83 |
| 11-03 | Gp3 | g.chr4:40154422G>C   | Missense Mutation | N4BP2  | p.K1722N  | NEDD4 binding protein 3               | 1 (0.00)   | 22 (0.27)  | 0.73 |
| 11-03 | Gp3 | g.chr13:101733918G>A | Missense Mutation | NALCN  | p.S1282L  | sodium leak channel, no               | 40 (0.00)  | 28 (0.18)  | 0.48 |
| 11-03 | Gp3 | g.chr18:10549028C>T  | Nonsense Mutation | NAPG   | p.Q244*   | N-ethylmaleimide-sensi                | 127 (0.00) | 67 (0.24)  | 0.64 |
| 11-03 | Gp3 | g.chr11:34137418A>T  | Nonsense Mutation | NAT10  | p.R182*   | N-acetyltransferase 10 ( $\epsilon$ ) | 16 (0.00)  | 19 (0.26)  | 0.70 |
| 11-03 | Gp3 | g.chr11:34155929G>C  | Missense Mutation | NAT10  | p.A600P   | N-acetyltransferase 10 ( $\epsilon$ ) | 34 (0.00)  | 30 (0.27)  | 0.71 |
| 11-03 | Gp3 | g.chr8:90967591T>A   | Silent            | NBN    | p.I439I   | nibrin                                | 55 (0.00)  | 60 (0.17)  | 0.44 |
| 11-03 | Gp3 | g.chr1:146420165G>A  | Missense Mutation | NBPF12 | p.R973H   | neuroblastoma breakpoi                | 52 (0.00)  | 31 (0.16)  | 0.43 |
| 11-03 | Gp3 | g.chr17:41342736C>T  | Missense Mutation | NBR1   | p.P269L   | neighbor of BRCA1 gen                 | 56 (0.00)  | 41 (0.27)  | 0.72 |
| 11-03 | Gp3 | g.chr11:134054836G>A | Missense Mutation | NCAPD3 | p.A766V   | non-SMC condensin II $\epsilon$       | 61 (0.00)  | 186 (0.15) | 0.39 |
| 11-03 | Gp3 | g.chr7:158457323C>A  | Missense Mutation | NCAPG2 | p.E533D   | non-SMC condensin II $\epsilon$       | 17 (0.00)  | 15 (0.33)  | 0.89 |
| 11-03 | Gp3 | g.chr1:183536120C>T  | Missense Mutation | NCF2   | p.G287R   | neutrophil cytosolic fact             | 23 (0.00)  | 18 (0.28)  | 0.74 |
| 11-03 | Gp3 | g.chr2:133486484G>A  | Missense Mutation | NCKAP5 | p.P1829S  | NCK-associated protein                | 59 (0.00)  | 22 (0.41)  | 0.71 |
| 11-03 | Gp3 | g.chr2:24985619C>T   | Missense Mutation | NCOA1  | p.L1377F  | nuclear receptor coactiv              | 114 (0.00) | 52 (0.19)  | 0.51 |
| 11-03 | Gp3 | g.chr20:46279896G>A  | Silent            | NCOA3  | p.Q1274Q  | nuclear receptor coactiv              | 41 (0.00)  | 25 (0.20)  | 0.53 |
| 11-03 | Gp3 | g.chr20:33329366C>T  | Missense Mutation | NCOA6  | p.S1565N  | nuclear receptor coactiv              | 41 (0.00)  | 39 (0.18)  | 0.48 |

|       |     |                      |                   |         |          |                           |            |            |      |
|-------|-----|----------------------|-------------------|---------|----------|---------------------------|------------|------------|------|
| 11-03 | Gp3 | g.chr4:121957543G>A  | Missense Mutation | NDNF    | p.T528I  | neuron-derived neurotro   | 23 (0.00)  | 49 (0.14)  | 0.38 |
| 11-03 | Gp3 | g.chr2:152374934G>A  | Silent            | NEB     | p.Y7566Y | nebulin                   | 37 (0.00)  | 45 (0.40)  | 1.07 |
| 11-03 | Gp3 | g.chr2:152417188C>G  | Missense Mutation | NEB     | p.R6411T | nebulin                   | 21 (0.00)  | 33 (0.15)  | 0.40 |
| 11-03 | Gp3 | g.chr2:152500433C>T  | Missense Mutation | NEB     | p.V2619I | nebulin                   | 51 (0.00)  | 81 (0.25)  | 0.66 |
| 11-03 | Gp3 | g.chr2:152522786C>A  | Missense Mutation | NEB     | p.G1617C | nebulin                   | 25 (0.00)  | 42 (0.14)  | 0.38 |
| 11-03 | Gp3 | g.chr6:11190573C>A   | Missense Mutation | NEDD9   | p.S510I  | neural precursor cell ex  | 18 (0.00)  | 29 (0.28)  | 0.74 |
| 11-03 | Gp3 | g.chr20:57566421G>T  | Missense Mutation | NELFCD  | p.A355S  | negative elongation fact  | 28 (0.00)  | 26 (0.19)  | 0.51 |
| 11-03 | Gp3 | g.chr12:55421124G>A  | Missense Mutation | NEUROD4 | p.G301S  | neuronal differentiation  | 47 (0.00)  | 68 (0.44)  | 1.18 |
| 11-03 | Gp3 | g.chr11:129751393G>A | Silent            | NFRKB   | p.S443S  | nuclear factor related to | 53 (0.00)  | 26 (0.27)  | 0.72 |
| 11-03 | Gp3 | g.chr5:177580540C>T  | Missense Mutation | NHP2    | p.R61Q   | NHP2 ribonucleoproteir    | 38 (0.00)  | 32 (0.25)  | 0.67 |
| 11-03 | Gp3 | g.chr5:177580560C>T  | Splice Site       | NHP2    | p.A54A   | NHP2 ribonucleoproteir    | 33 (0.00)  | 31 (0.23)  | 0.60 |
| 11-03 | Gp3 | g.chr15:23006629G>A  | Silent            | NIPA2   | p.L225L  | non imprinted in Prader-  | 28 (0.00)  | 32 (0.19)  | 0.50 |
| 11-03 | Gp3 | g.chrX:118723769G>C  | Nonsense Mutation | NKRF    | p.S540*  | NFKB repressing factor    | 46 (0.00)  | 20 (0.30)  | 0.50 |
| 11-03 | Gp3 | g.chr5:65105928G>T   | Silent            | NLN     | p.S593S  | neurolysin (metallopepti  | 60 (0.00)  | 45 (0.18)  | 0.47 |
| 11-03 | Gp3 | g.chr19:56320746C>T  | Silent            | NLRP11  | p.L410L  | NLR family, pyrin dom:    | 44 (0.00)  | 31 (0.19)  | 0.52 |
| 11-03 | Gp3 | g.chr11:7067942G>A   | Missense Mutation | NLRP14  | p.V668M  | NLR family, pyrin dom:    | 37 (0.03)  | 67 (0.27)  | 0.53 |
| 11-03 | Gp3 | g.chr19:56370090G>A  | Missense Mutation | NLRP4   | p.R444H  | NLR family, pyrin dom:    | 45 (0.00)  | 29 (0.17)  | 0.46 |
| 11-03 | Gp3 | g.chr19:56481953G>C  | Missense Mutation | NLRP8   | p.G809R  | NLR family, pyrin dom:    | 29 (0.00)  | 54 (0.19)  | 0.49 |
| 11-03 | Gp3 | g.chr2:152132015G>A  | Missense Mutation | NMI     | p.T206M  | N-myc (and STAT) inte     | 21 (0.00)  | 25 (0.20)  | 0.53 |
| 11-03 | Gp3 | g.chr10:96098424C>A  | Missense Mutation | NOC3L   | p.D678Y  | nucleolar complex assoc   | 25 (0.00)  | 30 (0.17)  | 0.44 |
| 11-03 | Gp3 | g.chr17:65734029A>T  | Silent            | NOL11   | p.L490L  | nucleolar protein 11      | 21 (0.00)  | 19 (0.26)  | 0.70 |
| 11-03 | Gp3 | g.chr18:31463302G>A  | Silent            | NOL4    | p.D258D  | nucleolar protein 4       | 30 (0.00)  | 49 (0.33)  | 0.87 |
| 11-03 | Gp3 | g.chr16:18549864C>A  | Missense Mutation | NOMO2   | p.D402Y  | NODAL modulator 2         | 134 (0.01) | 181 (0.34) | 0.90 |
| 11-03 | Gp3 | g.chr16:16367672G>A  | Silent            | NOMO3   | p.E727E  | NODAL modulator 3         | 67 (0.00)  | 22 (0.27)  | 0.73 |
| 11-03 | Gp3 | g.chr1:5993286G>A    | Missense Mutation | NPHP4   | p.P408L  | nephronophthisis 4        | 59 (0.00)  | 30 (0.17)  | 0.44 |
| 11-03 | Gp3 | g.chr5:32783023G>A   | Missense Mutation | NPR3    | p.E439K  | natriuretic peptide recep | 61 (0.02)  | 65 (0.15)  | 0.41 |
| 11-03 | Gp3 | g.chr4:156135843G>T  | Missense Mutation | NPY2R   | p.S251I  | neuropeptide Y receptor   | 42 (0.00)  | 42 (0.19)  | 0.51 |
| 11-03 | Gp3 | g.chr21:16337172C>T  | Silent            | NRIP1   | p.T1114T | nuclear receptor interact | 24 (0.00)  | 22 (0.23)  | 0.61 |
| 11-03 | Gp3 | g.chr21:16340330G>T  | Missense Mutation | NRIP1   | p.Q62K   | nuclear receptor interact | 33 (0.00)  | 25 (0.28)  | 0.75 |
| 11-03 | Gp3 | g.chr20:61391376C>A  | Silent            | NTSR1   | p.L338L  | neurotensin receptor 1    | 144 (0.02) | 46 (0.20)  | 0.52 |
| 11-03 | Gp3 | g.chr8:110257617G>C  | Missense Mutation | NUDCD1  | p.L465V  | NudC domain containin     | 36 (0.00)  | 29 (0.17)  | 0.46 |
| 11-03 | Gp3 | g.chr10:74882040G>A  | Missense Mutation | NUDT13  | p.G111S  | nudix (nucleoside dipho   | 43 (0.00)  | 41 (0.15)  | 0.39 |
| 11-03 | Gp3 | g.chr14:73749117G>A  | Missense Mutation | NUMB    | p.P349L  | numb homolog (Drosop      | 28 (0.00)  | 29 (0.28)  | 0.74 |
| 11-03 | Gp3 | g.chr11:47858456G>A  | Nonsense Mutation | NUP160  | p.R309*  | nucleoporin 160kDa        | 38 (0.00)  | 27 (0.37)  | 0.99 |
| 11-03 | Gp3 | g.chr7:135323416G>A  | Missense Mutation | NUP205  | p.D1793N | nucleoporin 205kDa        | 43 (0.02)  | 33 (0.27)  | 0.73 |

|       |     |                      |                   |         |          |                           |            |           |      |
|-------|-----|----------------------|-------------------|---------|----------|---------------------------|------------|-----------|------|
| 11-03 | Gp3 | g.chr1:153984778G>T  | Silent            | NUP210L | p.L1574L | nucleoporin 210kDa-like   | 34 (0.00)  | 23 (0.22) | 0.58 |
| 11-03 | Gp3 | g.chr9:134073762C>T  | Silent            | NUP214  | p.G1627G | nucleoporin 214kDa        | 18 (0.00)  | 24 (0.62) | 1.67 |
| 11-03 | Gp3 | g.chr13:25905590G>A  | Silent            | NUPL1   | p.Q431Q  | nucleoporin like 1        | 43 (0.00)  | 29 (0.17) | 0.46 |
| 11-03 | Gp3 | g.chr8:103564079C>A  | Missense Mutation | ODF1    | p.H42N   | outer dense fiber of sper | 50 (0.00)  | 71 (0.17) | 0.45 |
| 11-03 | Gp3 | g.chr15:76019516C>T  | Missense Mutation | ODF3L1  | p.L154F  | outer dense fiber of sper | 15 (0.00)  | 33 (0.18) | 0.48 |
| 11-03 | Gp3 | g.chr17:29622241G>A  | Missense Mutation | OMG     | p.S370L  | oligodendrocyte myelin    | 25 (0.00)  | 39 (0.31) | 0.82 |
| 11-03 | Gp3 | g.chr11:59712804C>A  | Nonsense Mutation | OOSP1   | p.C122*  | oocyte secreted protein   | 22 (0.00)  | 32 (0.19) | 0.50 |
| 11-03 | Gp3 | g.chr11:6890994C>T   | Silent            | OR10A2  | p.F3F    | olfactory receptor, famil | 57 (0.00)  | 53 (0.47) | 0.93 |
| 11-03 | Gp3 | g.chr11:6866928C>T   | Silent            | OR10A5  | p.N5N    | olfactory receptor, famil | 61 (0.00)  | 48 (0.23) | 0.45 |
| 11-03 | Gp3 | g.chr11:55735310G>A  | Silent            | OR10AG1 | p.G210G  | olfactory receptor, famil | 16 (0.00)  | 21 (0.29) | 0.76 |
| 11-03 | Gp3 | g.chr11:123909377C>T | Missense Mutation | OR10G7  | p.C111Y  | olfactory receptor, famil | 52 (0.02)  | 57 (0.30) | 0.80 |
| 11-03 | Gp3 | g.chr11:123909459C>T | Missense Mutation | OR10G7  | p.V84M   | olfactory receptor, famil | 64 (0.00)  | 70 (0.33) | 0.88 |
| 11-03 | Gp3 | g.chr11:123909460C>T | Silent            | OR10G7  | p.L83L   | olfactory receptor, famil | 64 (0.00)  | 69 (0.33) | 0.89 |
| 11-03 | Gp3 | g.chr1:247886671C>T  | Silent            | OR14A2  | p.K225K  | olfactory receptor, famil | 40 (0.03)  | 40 (0.30) | 0.80 |
| 11-03 | Gp3 | g.chr1:248202412C>A  | Silent            | OR2L2   | p.T281T  | olfactory receptor, famil | 16 (0.00)  | 41 (0.15) | 0.39 |
| 11-03 | Gp3 | g.chr1:248637363G>A  | Missense Mutation | OR2T3   | p.G238S  | olfactory receptor, famil | 93 (0.00)  | 30 (0.20) | 0.53 |
| 11-03 | Gp3 | g.chr1:248550938G>A  | Missense Mutation | OR2T6   | p.R10K   | olfactory receptor, famil | 43 (0.00)  | 40 (0.15) | 0.40 |
| 11-03 | Gp3 | g.chr5:180166337C>A  | Missense Mutation | OR2Y1   | p.G241V  | olfactory receptor, famil | 27 (0.00)  | 51 (0.16) | 0.42 |
| 11-03 | Gp3 | g.chr15:102346189C>G | Missense Mutation | OR4F6   | p.H89Q   | olfactory receptor, famil | 43 (0.02)  | 35 (0.23) | 0.61 |
| 11-03 | Gp3 | g.chr14:20444078G>A  | Missense Mutation | OR4K15  | p.S134N  | olfactory receptor, famil | 16 (0.00)  | 25 (0.28) | 0.75 |
| 11-03 | Gp3 | g.chr11:6150455G>A   | Missense Mutation | OR56B3P | p.V206M  | olfactory receptor, famil | 44 (0.00)  | 51 (0.22) | 0.43 |
| 11-03 | Gp3 | g.chr11:59189485G>A  | Silent            | OR5A2   | p.H314H  | olfactory receptor, famil | 51 (0.00)  | 36 (0.17) | 0.44 |
| 11-03 | Gp3 | g.chr11:59190360G>A  | Nonsense Mutation | OR5A2   | p.Q23*   | olfactory receptor, famil | 34 (0.00)  | 19 (0.32) | 0.84 |
| 11-03 | Gp3 | g.chr11:56258452C>A  | Missense Mutation | OR5M8   | p.G132V  | olfactory receptor, famil | 40 (0.00)  | 29 (0.38) | 1.01 |
| 11-03 | Gp3 | g.chr11:55681605C>A  | Nonsense Mutation | OR5W2   | p.G152*  | olfactory receptor, famil | 39 (0.03)  | 34 (0.26) | 0.71 |
| 11-03 | Gp3 | g.chr11:124253169C>A | Missense Mutation | OR8B2   | p.R24L   | olfactory receptor, famil | 42 (0.00)  | 69 (0.20) | 0.54 |
| 11-03 | Gp3 | g.chr11:124135691G>T | Silent            | OR8G5   | p.L323L  | olfactory receptor, famil | 97 (0.00)  | 62 (0.19) | 0.52 |
| 11-03 | Gp3 | g.chr3:125295097G>A  | Missense Mutation | OSBPL11 | p.S201F  | oxysterol binding protei  | 33 (0.00)  | 51 (0.20) | 0.52 |
| 11-03 | Gp3 | g.chr4:146059565G>A  | Missense Mutation | OTUD4   | p.P788S  | OTU deubiquitinase 4      | 40 (0.00)  | 34 (0.18) | 0.47 |
| 11-03 | Gp3 | g.chrX:48792117G>A   | Silent            | OTUD5   | p.S259S  | OTU deubiquitinase 5      | 68 (0.01)  | 30 (0.30) | 0.50 |
| 11-03 | Gp3 | g.chr1:111965573G>T  | Missense Mutation | OVGP1   | p.S195Y  | oviductal glycoprotein    | 194 (0.00) | 61 (0.23) | 0.61 |
| 11-03 | Gp3 | g.chr22:21399255C>T  | RNA               | P2RX6P  |          | purinergic receptor P2X   | 35 (0.00)  | 18 (0.28) | 0.74 |
| 11-03 | Gp3 | g.chr11:74015429C>T  | Missense Mutation | P4HA3   | p.E77K   | prolyl 4-hydroxylase, al  | 21 (0.00)  | 30 (0.23) | 0.62 |
| 11-03 | Gp3 | g.chr11:65984171G>A  | Silent            | PACS1   | p.L301L  | phosphofurin acidic clus  | 35 (0.00)  | 50 (0.18) | 0.48 |
| 11-03 | Gp3 | g.chr1:17682566C>T   | Silent            | PADI4   | p.L467L  | peptidyl arginine deim    | 30 (0.00)  | 43 (0.19) | 0.50 |

|       |     |                      |                   |          |          |                           |            |            |      |
|-------|-----|----------------------|-------------------|----------|----------|---------------------------|------------|------------|------|
| 11-03 | Gp3 | g.chr15:40557170G>T  | Missense Mutation | PAK6     | p.V62L   | p21 protein (Cdc42/Rac    | 88 (0.00)  | 32 (0.31)  | 0.83 |
| 11-03 | Gp3 | g.chr4:169433372C>A  | Silent            | PALLD    | p.A239A  | palladin, cytoskeletal as | 38 (0.00)  | 31 (0.29)  | 0.77 |
| 11-03 | Gp3 | g.chr12:56726691G>A  | Missense Mutation | PAN2     | p.S63F   | PAN2 poly(A) specific     | 136 (0.00) | 25 (0.28)  | 0.75 |
| 11-03 | Gp3 | g.chr1:176738867C>T  | Missense Mutation | PAPPA2   | p.T1483I | pappalysin 2              | 28 (0.00)  | 20 (0.35)  | 0.93 |
| 11-03 | Gp3 | g.chr15:72552957C>A  | Silent            | PARP6    | p.G206G  | poly (ADP-ribose) poly    | 138 (0.00) | 80 (0.36)  | 0.97 |
| 11-03 | Gp3 | g.chr5:49962966G>A   | Missense Mutation | PARP8    | p.D13N   | poly (ADP-ribose) poly    | 136 (0.00) | 56 (0.14)  | 0.38 |
| 11-03 | Gp3 | g.chr5:140262752G>A  | Missense Mutation | PCDHA13  | p.G300E  | protocadherin alpha 13    | 34 (0.03)  | 32 (0.22)  | 0.58 |
| 11-03 | Gp3 | g.chr5:140562251G>A  | Silent            | PCDHB16  | p.T39T   | protocadherin beta 16     | 24 (0.00)  | 20 (0.25)  | 0.67 |
| 11-03 | Gp3 | g.chr5:140614370G>A  | RNA               | PCDHB18  |          | protocadherin beta 18 p   | 25 (0.00)  | 27 (0.19)  | 0.49 |
| 11-03 | Gp3 | g.chr5:140811976G>A  | Silent            | PCDHGA12 | p.L550L  | protocadherin gamma st    | 53 (0.00)  | 95 (0.31)  | 0.81 |
| 11-03 | Gp3 | g.chr5:140724605C>A  | Silent            | PCDHGA3  | p.V335V  | protocadherin gamma st    | 86 (0.01)  | 36 (0.19)  | 0.52 |
| 11-03 | Gp3 | g.chr5:140798462G>A  | Missense Mutation | PCDHGB7  | p.E346K  | protocadherin gamma st    | 65 (0.00)  | 34 (0.15)  | 0.39 |
| 11-03 | Gp3 | g.chr11:82880870C>A  | Missense Mutation | PCF11    | p.P1165T | PCF11 cleavage and pol    | 87 (0.00)  | 52 (0.21)  | 0.56 |
| 11-03 | Gp3 | g.chr7:82544726C>A   | Missense Mutation | PCLO     | p.K4192N | piccolo presynaptic cyto  | 42 (0.00)  | 30 (0.30)  | 0.80 |
| 11-03 | Gp3 | g.chr7:82579217C>A   | Missense Mutation | PCLO     | p.G3563C | piccolo presynaptic cyto  | 44 (0.00)  | 95 (0.18)  | 0.48 |
| 11-03 | Gp3 | g.chr20:5096145G>A   | Missense Mutation | PCNA     | p.T219I  | proliferating cell nuclea | 24 (0.00)  | 38 (0.50)  | 1.33 |
| 11-03 | Gp3 | g.chr9:78973833C>A   | Missense Mutation | PCSK5    | p.Q1860K | proprotein convertase su  | 33 (0.00)  | 52 (0.27)  | 0.72 |
| 11-03 | Gp3 | g.chr1:144916632C>G  | Missense Mutation | PDE4DIP  | p.E712Q  | phosphodiesterase 4D ir   | 72 (0.00)  | 62 (0.32)  | 0.86 |
| 11-03 | Gp3 | g.chr15:85666404G>A  | Missense Mutation | PDE8A    | p.A689T  | phosphodiesterase 8A      | 33 (0.00)  | 44 (0.16)  | 0.42 |
| 11-03 | Gp3 | g.chr2:10928872G>A   | Silent            | PDIA6    | p.L369L  | protein disulfide isomer  | 65 (0.02)  | 43 (0.16)  | 0.43 |
| 11-03 | Gp3 | g.chr8:94935757C>T   | Silent            | PDP1     | p.N490N  | pyruvate dehydrogenase    | 153 (0.00) | 47 (0.19)  | 0.51 |
| 11-03 | Gp3 | g.chr10:119043301G>T | Missense Mutation | PDZD8    | p.D981E  | PDZ domain containing     | 62 (0.02)  | 79 (0.27)  | 0.71 |
| 11-03 | Gp3 | g.chr3:73440226G>A   | Silent            | PDZRN3   | p.G149G  | PDZ domain containing     | 20 (0.00)  | 38 (0.21)  | 0.56 |
| 11-03 | Gp3 | g.chr8:77896012C>A   | Missense Mutation | PEX2     | p.V135F  | peroxisomal biogenesis    | 50 (0.00)  | 21 (0.38)  | 1.02 |
| 11-03 | Gp3 | g.chr1:28818225G>C   | Missense Mutation | PHACTR4  | p.V658L  | phosphatase and actin re  | 57 (0.00)  | 99 (0.13)  | 0.43 |
| 11-03 | Gp3 | g.chr20:34451282C>A  | Silent            | PHF20    | p.P256P  | PHD finger protein 20     | 16 (0.00)  | 31 (0.19)  | 0.52 |
| 11-03 | Gp3 | g.chr18:60435567G>C  | Intron            | PHLPP1   |          | PH domain and leucine     | 56 (0.00)  | 68 (0.15)  | 0.39 |
| 11-03 | Gp3 | g.chr18:60465854G>A  | Intron            | PHLPP1   |          | PH domain and leucine     | 24 (0.00)  | 27 (0.19)  | 0.49 |
| 11-03 | Gp3 | g.chr18:60480157G>A  | Intron            | PHLPP1   |          | PH domain and leucine     | 38 (0.00)  | 28 (0.18)  | 0.48 |
| 11-03 | Gp3 | g.chr18:60518201G>C  | Intron            | PHLPP1   |          | PH domain and leucine     | 48 (0.00)  | 34 (0.26)  | 0.71 |
| 11-03 | Gp3 | g.chr18:60555302C>A  | Intron            | PHLPP1   |          | PH domain and leucine     | 25 (0.00)  | 30 (0.17)  | 0.44 |
| 11-03 | Gp3 | g.chr18:60642717C>A  | Missense Mutation | PHLPP1   | p.F1281L | PH domain and leucine     | 100 (0.00) | 37 (0.16)  | 0.43 |
| 11-03 | Gp3 | g.chr16:71703908G>C  | Intron            | PHLPP2   |          | PH domain and leucine     | 69 (0.00)  | 37 (0.19)  | 0.50 |
| 11-03 | Gp3 | g.chr10:13325785G>T  | Silent            | PHYH     | p.R245R  | phytanoyl-CoA 2-hydro     | 69 (0.01)  | 111 (0.17) | 0.46 |
| 11-03 | Gp3 | g.chr8:75756330G>T   | Nonsense Mutation | PI15     | p.G130*  | peptidase inhibitor 15    | 15 (0.00)  | 26 (0.27)  | 0.72 |

|       |     |                      |                   |          |          |                                                       |            |      |
|-------|-----|----------------------|-------------------|----------|----------|-------------------------------------------------------|------------|------|
| 11-03 | Gp3 | g.chr22:20383929C>T  | RNA               | PI4KAP1  |          | phosphatidylinositol 4-k25 (0.00)                     | 42 (0.14)  | 0.38 |
| 11-03 | Gp3 | g.chr1:145585379C>T  | Silent            | PIAS3    | p.T548T  | protein inhibitor of activin 109 (0.00)               | 61 (0.28)  | 0.74 |
| 11-03 | Gp3 | g.chr10:98469327C>A  | Nonsense Mutation | PIK3AP1  | p.E143*  | phosphoinositide-3-kinase 70 (0.00)                   | 18 (0.56)  | 1.48 |
| 11-03 | Gp3 | g.chr7:106513276C>A  | Missense Mutation | PIK3CG   | p.A727D  | phosphatidylinositol-4,5 bisphosphate 18 (0.00)       | 26 (0.19)  | 0.51 |
| 11-03 | Gp3 | g.chr16:71985570C>T  | RNA               | PKD1L3   |          | polycystic kidney disease 37 (0.00)                   | 25 (0.24)  | 0.64 |
| 11-03 | Gp3 | g.chr6:51768438G>T   | Missense Mutation | PKHD1    | p.T2318K | polycystic kidney and hepatobiliary disease 33 (0.00) | 33 (0.18)  | 0.48 |
| 11-03 | Gp3 | g.chr9:26928186G>T   | Silent            | PLAA     | p.I159I  | phospholipase A2-activator 27 (0.00)                  | 37 (0.16)  | 0.43 |
| 11-03 | Gp3 | g.chr10:95931065G>A  | Missense Mutation | PLCE1    | p.E541K  | phospholipase C, epsilon 47 (0.00)                    | 30 (0.20)  | 0.53 |
| 11-03 | Gp3 | g.chr3:155199516G>A  | Silent            | PLCH1    | p.G1441G | phospholipase C, eta 46 (0.00)                        | 30 (0.23)  | 0.62 |
| 11-03 | Gp3 | g.chr19:39915383A>T  | Missense Mutation | PLEKHG2  | p.I1204L | pleckstrin homology domain 59 (0.00)                  | 43 (0.19)  | 0.50 |
| 11-03 | Gp3 | g.chr10:20436783C>A  | Missense Mutation | PLXDC2   | p.F245L  | plexin domain containing 15 (0.00)                    | 22 (0.55)  | 1.45 |
| 11-03 | Gp3 | g.chr7:6045662A>T    | Splice Site       | PMS2     | p.S8R    | PMS2 postmeiotic segregation 21 (0.00)                | 36 (0.36)  | 0.96 |
| 11-03 | Gp3 | g.chr7:75144083G>T   | RNA               | PMS2P3   |          | postmeiotic segregation 28 (0.00)                     | 61 (0.36)  | 0.96 |
| 11-03 | Gp3 | g.chr10:118220804T>C | Splice Site       | PNLIPRP3 |          | pancreatic lipase-related protein 26 (0.00)           | 12 (0.42)  | 1.11 |
| 11-03 | Gp3 | g.chr14:74179977G>A  | Silent            | PNMA1    | p.V122V  | paraneoplastic Maternal antigen 58 (0.00)             | 31 (0.16)  | 0.43 |
| 11-03 | Gp3 | g.chr1:166818273C>T  | Missense Mutation | POGK     | p.R153C  | pogo transposable element 64 (0.00)                   | 34 (0.41)  | 1.10 |
| 11-03 | Gp3 | g.chr6:43581681G>C   | Missense Mutation | POLH     | p.S510T  | polymerase (DNA directed) 42 (0.00)                   | 31 (0.39)  | 1.03 |
| 11-03 | Gp3 | g.chr18:51807139G>A  | Missense Mutation | POLI     | p.C118Y  | polymerase (DNA directed) 38 (0.00)                   | 20 (0.50)  | 1.33 |
| 11-03 | Gp3 | g.chr7:72400590C>T   | Missense Mutation | POM121   | p.P141S  | POM121 transmembrane protein 28 (0.00)                | 32 (0.16)  | 0.42 |
| 11-03 | Gp3 | g.chr7:72418966C>T   | Missense Mutation | POM121   | p.P986L  | POM121 transmembrane protein 43 (0.00)                | 32 (0.25)  | 0.67 |
| 11-03 | Gp3 | g.chr18:14537880G>A  | Missense Mutation | POTEC    | p.H244Y  | POTE ankyrin domain family 71 (0.00)                  | 46 (0.22)  | 0.58 |
| 11-03 | Gp3 | g.chr22:16287591C>A  | Missense Mutation | POTEH    | p.G99C   | POTE ankyrin domain family 40 (0.00)                  | 78 (0.22)  | 0.58 |
| 11-03 | Gp3 | g.chr3:87311278C>T   | Missense Mutation | POU1F1   | p.A183T  | POU class 1 homeobox 30 (0.00)                        | 25 (0.32)  | 0.47 |
| 11-03 | Gp3 | g.chr1:167341207G>T  | Missense Mutation | POU2F1   | p.Q101H  | POU class 2 homeobox 95 (0.00)                        | 60 (0.20)  | 0.53 |
| 11-03 | Gp3 | g.chr11:7586931C>A   | Missense Mutation | PPFIBP2  | p.A71E   | PTPRF interacting protein 29 (0.00)                   | 31 (0.19)  | 0.38 |
| 11-03 | Gp3 | g.chr1:12921136C>T   | Silent            | PRAMEF2  | p.D309D  | PRAME family member 209 (0.00)                        | 115 (0.17) | 0.44 |
| 11-03 | Gp3 | g.chr1:12921256C>A   | Silent            | PRAMEF2  | p.A349A  | PRAME family member 123 (0.00)                        | 48 (0.27)  | 0.72 |
| 11-03 | Gp3 | g.chr1:14105424C>T   | Silent            | PRDM2    | p.H378H  | PR domain containing 255 (0.00)                       | 36 (0.25)  | 0.67 |
| 11-03 | Gp3 | g.chr7:645868C>T     | Missense Mutation | PRKAR1B  | p.G171R  | protein kinase, cAMP-dependent 17 (0.00)              | 37 (0.22)  | 0.58 |
| 11-03 | Gp3 | g.chr3:53220345T>C   | Missense Mutation | PRKCD    | p.F417L  | protein kinase C, delta 19 (0.00)                     | 22 (0.23)  | 0.61 |
| 11-03 | Gp3 | g.chr11:76063069C>A  | Missense Mutation | PRKRIR   | p.M375I  | protein-kinase, interferon-gamma 59 (0.00)            | 41 (0.17)  | 0.46 |
| 11-03 | Gp3 | g.chr6:4032932G>A    | Missense Mutation | PRPF4B   | p.S394N  | pre-mRNA processing factor 20 (0.05)                  | 31 (0.23)  | 0.60 |
| 11-03 | Gp3 | g.chr9:80921258C>T   | Silent            | PSAT1    | p.L142L  | phosphoserine aminotransferase 36 (0.00)              | 44 (0.16)  | 0.42 |
| 11-03 | Gp3 | g.chr9:80932698G>A   | Missense Mutation | PSAT1    | p.D283N  | phosphoserine aminotransferase 49 (0.00)              | 80 (0.29)  | 0.77 |
| 11-03 | Gp3 | g.chr19:43262246C>G  | Missense Mutation | PSG8     | p.G206A  | pregnancy specific beta-2-glycoprotein 75 (0.00)      | 55 (0.35)  | 0.92 |

|       |     |                     |                   |          |          |                                  |             |            |      |
|-------|-----|---------------------|-------------------|----------|----------|----------------------------------|-------------|------------|------|
| 11-03 | Gp3 | g.chr17:38142896G>A | Silent            | PSMD3    | p.L160L  | proteasome (prosome, n 60 (0.00) | 51 (0.31)   | 0.84       |      |
| 11-03 | Gp3 | g.chr1:151237972G>A | Missense Mutation | PSMD4    | p.D181N  | proteasome (prosome, n 86 (0.00) | 82 (0.15)   | 0.39       |      |
| 11-03 | Gp3 | g.chr1:151237976C>A | Missense Mutation | PSMD4    | p.A182D  | proteasome (prosome, n 85 (0.00) | 88 (0.19)   | 0.52       |      |
| 11-03 | Gp3 | g.chr13:20279922C>T | Missense Mutation | PSPC1    | p.M422I  | paraspeckle component            | 42 (0.00)   | 18 (0.28)  | 0.74 |
| 11-03 | Gp3 | g.chr9:98218592C>T  | Missense Mutation | PTCH1    | p.G1091D | patched 1                        | 82 (0.01)   | 27 (0.26)  | 0.69 |
| 11-03 | Gp3 | g.chr6:47846647G>A  | Missense Mutation | PTCHD4   | p.P645S  | patched domain containi          | 114 (0.00)  | 91 (0.19)  | 0.50 |
| 11-03 | Gp3 | g.chr7:77201779T>G  | Intron            | PTPN12   |          | protein tyrosine phosphat        | 40 (0.00)   | 61 (0.15)  | 0.39 |
| 11-03 | Gp3 | g.chr7:77217925C>T  | Intron            | PTPN12   |          | protein tyrosine phosphat        | 15 (0.00)   | 12 (0.50)  | 1.33 |
| 11-03 | Gp3 | g.chr9:112172695C>T | Splice Site       | PTPN3    | p.E438E  | protein tyrosine phosphat        | 36 (0.00)   | 11 (0.45)  | 1.21 |
| 11-03 | Gp3 | g.chr12:70953253G>T | Missense Mutation | PTPRB    | p.N1440K | protein tyrosine phosphat        | 80 (0.00)   | 35 (0.20)  | 0.53 |
| 11-03 | Gp3 | g.chr6:128294867C>T | Missense Mutation | PTPRK    | p.V1365M | protein tyrosine phosphat        | 44 (0.02)   | 19 (0.42)  | 0.68 |
| 11-03 | Gp3 | g.chr18:7888132G>A  | Silent            | PTPRM    | p.G75G   | protein tyrosine phosphat        | 19 (0.00)   | 32 (0.25)  | 0.67 |
| 11-03 | Gp3 | g.chr18:7888307G>A  | Missense Mutation | PTPRM    | p.G134R  | protein tyrosine phosphat        | 19 (0.00)   | 34 (0.21)  | 0.55 |
| 11-03 | Gp3 | g.chr4:37962465C>A  | Missense Mutation | PTTG2    | p.A137E  | pituitary tumor-transfor         | 72 (0.00)   | 40 (0.17)  | 0.47 |
| 11-03 | Gp3 | g.chr8:144898851C>T | Missense Mutation | PUF60    | p.E507K  | poly-U binding splicing          | 38 (0.00)   | 56 (0.16)  | 0.43 |
| 11-03 | Gp3 | g.chr20:25260907G>A | Nonsense Mutation | PYGB     | p.W366*  | phosphorylase, glycogen          | 32 (0.00)   | 35 (0.29)  | 0.76 |
| 11-03 | Gp3 | g.chr15:55838549C>A | Missense Mutation | PYGO1    | p.R311I  | pygopus family PHD fir           | 19 (0.00)   | 41 (0.17)  | 0.46 |
| 11-03 | Gp3 | g.chr11:73429857C>G | Missense Mutation | RAB6A    | p.A88P   | RAB6A, member RAS (              | 34 (0.00)   | 34 (0.21)  | 0.55 |
| 11-03 | Gp3 | g.chr2:130738055C>T | Silent            | RAB6C    | p.L123L  | RAB6C, member RAS (              | 115 (0.00)  | 35 (0.26)  | 0.45 |
| 11-03 | Gp3 | g.chr9:125835915G>A | Missense Mutation | RABGAP1  | p.D690N  | RAB GTPase activating            | 64 (0.00)   | 38 (0.24)  | 0.63 |
| 11-03 | Gp3 | g.chr9:134514093C>T | Missense Mutation | RAPGEF1  | p.V194M  | Rap guanine nucleotide           | 48 (0.00)   | 31 (0.42)  | 1.12 |
| 11-03 | Gp3 | g.chr4:82380560C>A  | Missense Mutation | RASGEF1B | p.D35Y   | RasGEF domain family,            | 20 (0.00)   | 35 (0.20)  | 0.53 |
| 11-03 | Gp3 | g.chr13:48967204G>T | Intron            | RB1      |          | retinoblastoma 1                 | 44 (0.02)   | 58 (0.19)  | 0.51 |
| 11-03 | Gp3 | g.chr7:155493615G>C | Missense Mutation | RBM33    | p.R279T  | RNA binding motif prot           | 35 (0.00)   | 43 (0.30)  | 0.81 |
| 11-03 | Gp3 | g.chr3:50131275G>A  | Silent            | RBM5     | p.L102L  | RNA binding motif prot           | 72 (0.00)   | 60 (0.17)  | 0.44 |
| 11-03 | Gp3 | g.chr11:32119955C>T | Missense Mutation | RCN1     | p.R170C  | reticulocalbin 1, EF-han         | 82 (0.00)   | 57 (0.18)  | 0.47 |
| 11-03 | Gp3 | g.chr11:63680184G>T | Missense Mutation | RCOR2    | p.R331S  | REST corepressor 2               | 27 (0.00)   | 30 (0.17)  | 0.44 |
| 11-03 | Gp3 | g.chr19:10129542G>A | Missense Mutation | RDH8     | p.R153Q  | retinol dehydrogenase            | 8 21 (0.00) | 30 (0.17)  | 0.56 |
| 11-03 | Gp3 | g.chr17:73654381G>A | Silent            | RECQL5   | p.L382L  | RecQ protein-like 5              | 88 (0.00)   | 92 (0.32)  | 0.84 |
| 11-03 | Gp3 | g.chr9:136279846G>A | Nonsense Mutation | REXO4    | p.R171*  | REX4, RNA exonucleas             | 51 (0.02)   | 42 (0.14)  | 0.38 |
| 11-03 | Gp3 | g.chr4:39314377C>T  | Missense Mutation | RFC1     | p.D460N  | replication factor C (acti       | 34 (0.00)   | 67 (0.21)  | 0.56 |
| 11-03 | Gp3 | g.chr4:39314478G>A  | Missense Mutation | RFC1     | p.A426V  | replication factor C (acti       | 39 (0.00)   | 49 (0.14)  | 0.38 |
| 11-03 | Gp3 | g.chr7:73657557G>A  | Nonsense Mutation | RFC2     | p.Q152*  | replication factor C (acti       | 37 (0.00)   | 28 (0.18)  | 0.48 |
| 11-03 | Gp3 | g.chr2:108487699G>T | Missense Mutation | RGPD4    | p.R1080M | RANBP2-like and GRIIF            | 143 (0.01)  | 103 (0.26) | 0.70 |
| 11-03 | Gp3 | g.chr1:42880190G>A  | Missense Mutation | RIMKLA   | p.G241S  | ribosomal modification           | 36 (0.00)   | 34 (0.15)  | 0.39 |

|       |     |                      |                   |               |          |                                    |            |           |      |
|-------|-----|----------------------|-------------------|---------------|----------|------------------------------------|------------|-----------|------|
| 11-03 | Gp3 | g.chr19:39359780C>G  | Missense Mutation | RINL          | p.W555C  | Ras and Rab interactor-125 (0.00)  | 21 (0.29)  | 0.96      |      |
| 11-03 | Gp3 | g.chr15:89755084C>T  | Missense Mutation | RLBP1         | p.E192K  | retinaldehyde binding p16 (0.00)   | 23 (0.30)  | 0.81      |      |
| 11-03 | Gp3 | g.chr13:25352498C>A  | Nonsense Mutation | RNF17         | p.S128*  | ring finger protein 17             | 25 (0.04)  | 33 (0.24) | 0.65 |
| 11-03 | Gp3 | g.chr12:121855600C>T | Silent            | RNF34         | p.S173S  | ring finger protein 34, E83 (0.00) | 105 (0.19) | 0.64      |      |
| 11-03 | Gp3 | g.chr5:177059544C>G  | RNA               | RP11-1277A3.2 |          |                                    | 52 (0.00)  | 28 (0.18) | 0.48 |
| 11-03 | Gp3 | g.chr3:192874144C>T  | lincRNA           | RP11-143P4.2  |          |                                    | 43 (0.02)  | 23 (0.48) | 1.28 |
| 11-03 | Gp3 | g.chr17:15519008C>A  | Missense Mutation | RP11-385D13   | p.L517F  |                                    | 55 (0.00)  | 88 (0.15) | 0.39 |
| 11-03 | Gp3 | g.chr10:46914639G>A  | lincRNA           | RP11-38L15.8  |          |                                    | 44 (0.00)  | 35 (0.14) | 0.38 |
| 11-03 | Gp3 | g.chr14:24629603C>T  | Missense Mutation | RP11-468E2.4  | p.A526V  |                                    | 65 (0.00)  | 66 (0.18) | 0.48 |
| 11-03 | Gp3 | g.chr12:122701132C>A | Splice Site       | RP11-512M8.5  |          |                                    | 35 (0.00)  | 60 (0.18) | 0.49 |
| 11-03 | Gp3 | g.chr15:90814419G>A  | Splice Site       | RP11-697E2.6  |          |                                    | 23 (0.00)  | 25 (0.28) | 0.75 |
| 11-03 | Gp3 | g.chr10:27537724C>A  | lincRNA           | RP11-85G18.6  |          |                                    | 24 (0.00)  | 22 (0.27) | 0.73 |
| 11-03 | Gp3 | g.chr18:47016876G>A  | Missense Mutation | RPL17-C18orf  | p.A88V   | RPL17-C18orf32 readth              | 15 (0.00)  | 26 (0.19) | 0.51 |
| 11-03 | Gp3 | g.chr22:39713635C>A  | Splice Site       | RPL3          |          | ribosomal protein L3               | 20 (0.00)  | 29 (0.17) | 0.46 |
| 11-03 | Gp3 | g.chr3:12880915G>A   | Missense Mutation | RPL32         | p.P71S   | ribosomal protein L32              | 50 (0.00)  | 37 (0.16) | 0.43 |
| 11-03 | Gp3 | g.chr3:129116244C>T  | RNA               | RPL32P3       |          | ribosomal protein L32 p107 (0.00)  | 130 (0.20) | 0.53      |      |
| 11-03 | Gp3 | g.chr1:152129151C>T  | Missense Mutation | RPTN          | p.G142R  | repetin                            | 75 (0.00)  | 58 (0.41) | 0.77 |
| 11-03 | Gp3 | g.chr11:4144576C>T   | Silent            | RRM1          | p.L428L  | ribonucleotide reductase           | 45 (0.02)  | 73 (0.21) | 0.55 |
| 11-03 | Gp3 | g.chr1:114310957G>A  | Silent            | RSBN1         | p.R571R  | round spermatid basic p19 (0.00)   | 24 (0.21)  | 0.56      |      |
| 11-03 | Gp3 | g.chr16:11933740C>T  | Missense Mutation | RSL1D1        | p.D320N  | ribosomal L1 domain cc61 (0.00)    | 36 (0.22)  | 0.59      |      |
| 11-03 | Gp3 | g.chr10:70115110C>T  | Splice Site       | RUFY2         | p.Q533Q  | RUN and FYVE domain                | 36 (0.00)  | 25 (0.28) | 0.75 |
| 11-03 | Gp3 | g.chr3:72448859C>T   | Intron            | RYBP          |          | RING1 and YY1 binding              | 46 (0.00)  | 21 (0.48) | 0.62 |
| 11-03 | Gp3 | g.chr15:33858887C>A  | Silent            | RYR3          | p.L385L  | ryanodine receptor 3               | 41 (0.00)  | 29 (0.21) | 0.55 |
| 11-03 | Gp3 | g.chr11:18111006T>C  | Missense Mutation | SAAL1         | p.D214G  | serum amyloid A-like 1             | 26 (0.00)  | 28 (0.21) | 0.57 |
| 11-03 | Gp3 | g.chr13:23932487G>T  | Silent            | SACS          | p.V197V  | sacsin molecular chapter           | 21 (0.00)  | 23 (0.22) | 0.58 |
| 11-03 | Gp3 | g.chrX:134988653C>T  | Missense Mutation | SAGE1         | p.P227S  | sarcoma antigen 1                  | 23 (0.00)  | 13 (0.38) | 0.64 |
| 11-03 | Gp3 | g.chr15:77021017C>A  | Missense Mutation | SCAPER        | p.R695M  | S-phase cyclin A-associated        | 69 (0.00)  | 35 (0.26) | 0.69 |
| 11-03 | Gp3 | g.chr2:224463115G>A  | Missense Mutation | SCG2          | p.R296W  | secretogranin II                   | 37 (0.03)  | 26 (0.27) | 0.72 |
| 11-03 | Gp3 | g.chr15:32976830T>A  | Missense Mutation | SCG5          | p.L150H  | secretogranin V (7B2 p74)          | 74 (0.00)  | 64 (0.16) | 0.42 |
| 11-03 | Gp3 | g.chr3:38951626G>A   | Silent            | SCN11A        | p.N344N  | sodium channel, voltage            | 25 (0.00)  | 30 (0.27) | 0.43 |
| 11-03 | Gp3 | g.chr2:166848835G>T  | Silent            | SCN1A         | p.I1622I | sodium channel, voltage            | 49 (0.00)  | 41 (0.22) | 0.59 |
| 11-03 | Gp3 | g.chr7:4051771T>G    | Missense Mutation | SDK1          | p.I775R  | sidekick cell adhesion r31         | 31 (0.00)  | 37 (0.14) | 0.45 |
| 11-03 | Gp3 | g.chr7:4247757G>A    | Silent            | SDK1          | p.Q1727Q | sidekick cell adhesion r55         | 55 (0.02)  | 28 (0.18) | 0.60 |
| 11-03 | Gp3 | g.chr7:4259793G>T    | Silent            | SDK1          | p.L1844L | sidekick cell adhesion r17         | 17 (0.00)  | 12 (0.42) | 1.40 |
| 11-03 | Gp3 | g.chr12:113875740C>A | Silent            | SDSL          | p.A282A  | serine dehydratase-like            | 28 (0.00)  | 32 (0.22) | 0.58 |



|       |     |                      |                   |          |          |                           |            |           |      |
|-------|-----|----------------------|-------------------|----------|----------|---------------------------|------------|-----------|------|
| 11-03 | Gp3 | g.chr18:12984167T>A  | Missense Mutation | SEH1L    | p.L350I  | SEH1-like (S. cerevisiae) | 44 (0.00)  | 49 (0.18) | 0.49 |
| 11-03 | Gp3 | g.chr14:81972452G>T  | Missense Mutation | SEL1L    | p.D158E  | sel-1 suppressor of lin-1 | 39 (0.00)  | 25 (0.28) | 0.75 |
| 11-03 | Gp3 | g.chr7:82996951C>T   | Missense Mutation | SEMA3E   | p.R760H  | sema domain, immunog      | 26 (0.00)  | 26 (0.46) | 1.23 |
| 11-03 | Gp3 | g.chr11:94917663C>T  | Missense Mutation | SESN3    | p.M147I  | sestrin 3                 | 28 (0.00)  | 14 (0.36) | 0.95 |
| 11-03 | Gp3 | g.chr4:140441448G>A  | Nonsense Mutation | SETD7    | p.R249*  | SET domain containing     | 44 (0.00)  | 28 (0.36) | 0.95 |
| 11-03 | Gp3 | g.chr16:70566490C>T  | Missense Mutation | SF3B3    | p.P227S  | splicing factor 3b, subu  | 24 (0.00)  | 55 (0.16) | 0.44 |
| 11-03 | Gp3 | g.chr10:102794560C>A | Missense Mutation | SFXN3    | p.L37M   | sideroflexin 3            | 45 (0.00)  | 44 (0.27) | 0.73 |
| 11-03 | Gp3 | g.chr20:42213501G>A  | Missense Mutation | SGK2     | p.A317T  | serum/glucocorticoid re   | 55 (0.00)  | 72 (0.44) | 1.19 |
| 11-03 | Gp3 | g.chr6:80383471C>G   | Silent            | SH3BGRL2 | p.G62G   | SH3 domain binding glu    | 35 (0.00)  | 46 (0.46) | 1.22 |
| 11-03 | Gp3 | g.chr5:148406495G>A  | Missense Mutation | SH3TC2   | p.H927Y  | SH3 domain and tetratri   | 74 (0.01)  | 56 (0.36) | 0.71 |
| 11-03 | Gp3 | g.chr15:49135608C>T  | Missense Mutation | SHC4     | p.G494E  | SHC (Src homology 2 d     | 43 (0.00)  | 33 (0.48) | 1.29 |
| 11-03 | Gp3 | g.chr13:26620904G>A  | Missense Mutation | SHISA2   | p.T212I  | shisa family member 2     | 30 (0.00)  | 13 (0.46) | 1.23 |
| 11-03 | Gp3 | g.chr6:146231623G>A  | Silent            | SHPRH    | p.T1492T | SNF2 histone linker PH    | 50 (0.02)  | 21 (0.24) | 0.63 |
| 11-03 | Gp3 | g.chr19:51770751G>A  | Missense Mutation | SIGLECL1 | p.V179I  | SIGLEC family like 1      | 53 (0.02)  | 25 (0.28) | 0.75 |
| 11-03 | Gp3 | g.chr15:75668125T>A  | Missense Mutation | SIN3A    | p.N1158Y | SIN3 transcription regul  | 93 (0.00)  | 61 (0.16) | 0.44 |
| 11-03 | Gp3 | g.chr15:75705331C>T  | Missense Mutation | SIN3A    | p.D177N  | SIN3 transcription regul  | 30 (0.00)  | 37 (0.16) | 0.43 |
| 11-03 | Gp3 | g.chr14:72152079G>A  | Splice Site       | SIPA1L1  | p.R1035R | signal-induced prolifera  | 41 (0.00)  | 39 (0.23) | 0.62 |
| 11-03 | Gp3 | g.chr5:131729375C>T  | Silent            | SLC22A5  | p.Y486Y  | solute carrier family 22  | 45 (0.00)  | 30 (0.27) | 0.71 |
| 11-03 | Gp3 | g.chr20:19664832G>A  | Missense Mutation | SLC24A3  | p.R305H  | solute carrier family 24  | 22 (0.00)  | 38 (0.26) | 0.70 |
| 11-03 | Gp3 | g.chr7:95750636G>A   | Missense Mutation | SLC25A13 | p.P632L  | solute carrier family 25  | 40 (0.00)  | 32 (0.25) | 0.67 |
| 11-03 | Gp3 | g.chr1:108681704C>T  | Missense Mutation | SLC25A24 | p.V390M  | solute carrier family 25  | 24 (0.00)  | 23 (0.22) | 0.58 |
| 11-03 | Gp3 | g.chr12:98992321A>T  | Missense Mutation | SLC25A3  | p.T162S  | solute carrier family 25  | 16 (0.00)  | 30 (0.20) | 0.53 |
| 11-03 | Gp3 | g.chr3:39435918C>T   | Missense Mutation | SLC25A38 | p.L215F  | solute carrier family 25, | 19 (0.00)  | 19 (0.32) | 0.84 |
| 11-03 | Gp3 | g.chr7:103033473G>A  | Missense Mutation | SLC26A5  | p.L338F  | solute carrier family 26  | 54 (0.00)  | 39 (0.15) | 0.41 |
| 11-03 | Gp3 | g.chr15:50497455G>A  | Silent            | SLC27A2  | p.R54R   | solute carrier family 27  | 20 (0.00)  | 18 (0.28) | 0.74 |
| 11-03 | Gp3 | g.chr15:45556945G>A  | Silent            | SLC28A2  | p.Q227Q  | solute carrier family 28  | 18 (0.00)  | 27 (0.33) | 0.89 |
| 11-03 | Gp3 | g.chr3:170715847G>T  | Missense Mutation | SLC2A2   | p.L474M  | solute carrier family 2   | 115 (0.00) | 13 (0.38) | 1.03 |
| 11-03 | Gp3 | g.chr12:8075487G>A   | Missense Mutation | SLC2A3   | p.A401V  | solute carrier family 2   | 121 (0.00) | 18 (0.28) | 0.74 |
| 11-03 | Gp3 | g.chr6:118635407G>T  | Missense Mutation | SLC35F1  | p.V407L  | solute carrier family 35, | 30 (0.00)  | 22 (0.41) | 0.66 |
| 11-03 | Gp3 | g.chr3:136574276G>A  | Missense Mutation | SLC35G2  | p.C325Y  | solute carrier family 35, | 122 (0.01) | 50 (0.16) | 0.43 |
| 11-03 | Gp3 | g.chr5:33963963G>T   | Missense Mutation | SLC45A2  | p.P241T  | solute carrier family 45, | 44 (0.00)  | 19 (0.32) | 0.84 |
| 11-03 | Gp3 | g.chr16:24922656G>A  | Missense Mutation | SLC5A11  | p.M610I  | solute carrier family 5   | 28 (0.00)  | 65 (0.17) | 0.45 |
| 11-03 | Gp3 | g.chr12:85279290C>A  | Missense Mutation | SLC6A15  | p.L59F   | solute carrier family 6   | 35 (0.00)  | 17 (0.47) | 1.25 |
| 11-03 | Gp3 | g.chr13:30106973G>A  | Missense Mutation | SLC7A1   | p.L173F  | solute carrier family 7   | 110 (0.01) | 24 (0.38) | 0.43 |
| 11-03 | Gp3 | g.chr12:98850461C>T  | RNA               | SLC9A7P1 |          | solute carrier family 9,  | s43 (0.00) | 12 (0.42) | 1.11 |

|       |     |                      |                   |          |          |                                     |           |           |      |
|-------|-----|----------------------|-------------------|----------|----------|-------------------------------------|-----------|-----------|------|
| 11-03 | Gp3 | g.chr4:103971519G>T  | Missense Mutation | SLC9B2   | p.L98I   | solute carrier family 9, s23 (0.00) | 26 (0.23) | 0.62      |      |
| 11-03 | Gp3 | g.chr13:88327961G>A  | Silent            | SLITRK5  | p.G106G  | SLIT and NTRK-like fa 35 (0.00)     | 22 (0.45) | 1.21      |      |
| 11-03 | Gp3 | g.chr18:48597050C>T  | Intron            | SMAD4    |          | SMAD family member 27 (0.04)        | 32 (0.38) | 1.00      |      |
| 11-03 | Gp3 | g.chrX:128640157G>A  | Missense Mutation | SMARCA1  | p.T333I  | SWI/SNF related, matri:84 (0.00)    | 43 (0.35) | 0.58      |      |
| 11-03 | Gp3 | g.chr22:24175818G>C  | Missense Mutation | SMARCB1  | p.W303S  | SWI/SNF related, matri:44 (0.00)    | 38 (0.21) | 0.56      |      |
| 11-03 | Gp3 | g.chr3:47734785G>A   | Silent            | SMARCC1  | p.L391L  | SWI/SNF related, matri:60 (0.00)    | 32 (0.16) | 0.42      |      |
| 11-03 | Gp3 | g.chr12:56567524C>T  | Missense Mutation | SMARCC2  | p.D536N  | SWI/SNF related, matri:36 (0.00)    | 51 (0.16) | 0.42      |      |
| 11-03 | Gp3 | g.chr10:112362364G>A | Missense Mutation | SMC3     | p.G1080S | structural maintenance c26 (0.00)   | 37 (0.19) | 0.50      |      |
| 11-03 | Gp3 | g.chr16:18882790G>A  | Missense Mutation | SMG1     | p.T733I  | SMG1 phosphatidylinos 29 (0.00)     | 28 (0.21) | 0.57      |      |
| 11-03 | Gp3 | g.chr16:18891038G>T  | Missense Mutation | SMG1     | p.L433M  | SMG1 phosphatidylinos 64 (0.00)     | 66 (0.15) | 0.40      |      |
| 11-03 | Gp3 | g.chr1:183514371C>A  | Missense Mutation | SMG7     | p.T765N  | SMG7 nonsense mediato 71 (0.00)     | 67 (0.15) | 0.40      |      |
| 11-03 | Gp3 | g.chr2:88390550C>T   | Missense Mutation | SMYD1    | p.T183I  | SET and MYND domain 23 (0.00)       | 27 (0.37) | 0.75      |      |
| 11-03 | Gp3 | g.chr17:1715274C>A   | Silent            | SMYD4    | p.L90L   | SET and MYND domain 26 (0.00)       | 56 (0.14) | 0.38      |      |
| 11-03 | Gp3 | g.chr17:1715346G>A   | Silent            | SMYD4    | p.D66D   | SET and MYND domain 32 (0.00)       | 55 (0.16) | 0.44      |      |
| 11-03 | Gp3 | g.chr5:121785550G>A  | Missense Mutation | SNCAIP   | p.E582K  | synuclein, alpha interact 17 (0.00) | 24 (0.21) | 0.56      |      |
| 11-03 | Gp3 | g.chr15:25318347C>A  | RNA               | SNHG14   |          | small nucleolar RNA ho 40 (0.00)    | 22 (0.23) | 0.61      |      |
| 11-03 | Gp3 | g.chr2:96950202G>C   | Missense Mutation | SNRNP200 | p.P1429R | small nuclear ribonuclec 22 (0.00)  | 16 (0.31) | 0.83      |      |
| 11-03 | Gp3 | g.chr1:203832810G>A  | Nonsense Mutation | SNRPE    | p.W34*   | small nuclear ribonuclec 16 (0.00)  | 51 (0.22) | 0.58      |      |
| 11-03 | Gp3 | g.chr5:122154641C>T  | Nonsense Mutation | SNX2     | p.Q262*  | sorting nexin 2 25 (0.00)           | 24 (0.21) | 0.56      |      |
| 11-03 | Gp3 | g.chr16:12618628A>T  | Missense Mutation | SNX29    | p.I750F  | sorting nexin 29 63 (0.00)          | 46 (0.30) | 0.81      |      |
| 11-03 | Gp3 | g.chr18:8720380G>A   | Silent            | SOGA2    | p.T441T  |                                     | 60 (0.00) | 42 (0.19) | 0.51 |
| 11-03 | Gp3 | g.chr18:8720427G>A   | Missense Mutation | SOGA2    | p.R457Q  |                                     | 63 (0.00) | 40 (0.25) | 0.67 |
| 11-03 | Gp3 | g.chr2:174820699C>T  | Missense Mutation | SP3      | p.G181S  | Sp3 transcription factor 76 (0.00)  | 63 (0.30) | 0.80      |      |
| 11-03 | Gp3 | g.chr4:88403648C>T   | Silent            | SPARCL1  | p.K407K  | SPARC-like 1 (hevin) 25 (0.00)      | 30 (0.17) | 0.44      |      |
| 11-03 | Gp3 | g.chr16:89764695C>T  | Missense Mutation | SPATA2L  | p.V108M  | spermatogenesis associa 40 (0.00)   | 86 (0.21) | 0.56      |      |
| 11-03 | Gp3 | g.chr16:89614427C>A  | Missense Mutation | SPG7     | p.N523K  | spastic paraplegia 7 (pu 19 (0.00)  | 38 (0.29) | 0.77      |      |
| 11-03 | Gp3 | g.chr17:47690840G>A  | Intron            | SPOP     |          | speckle-type POZ protei 57 (0.00)   | 48 (0.21) | 0.56      |      |
| 11-03 | Gp3 | g.chr17:47698760G>A  | Intron            | SPOP     |          | speckle-type POZ protei 37 (0.00)   | 46 (0.15) | 0.41      |      |
| 11-03 | Gp3 | g.chr17:47716199C>A  | Intron            | SPOP     |          | speckle-type POZ protei 58 (0.00)   | 62 (0.21) | 0.56      |      |
| 11-03 | Gp3 | g.chr14:78043249C>T  | Silent            | SPTLC2   | p.G164G  | serine palmitoyltransfer: 52 (0.00) | 48 (0.15) | 0.39      |      |
| 11-03 | Gp3 | g.chr2:45826594C>T   | Missense Mutation | SRBD1    | p.M214I  | S1 RNA binding domain 42 (0.00)     | 57 (0.23) | 0.61      |      |
| 11-03 | Gp3 | g.chr6:36566687C>T   | Missense Mutation | SRSF3    | p.R90C   | serine/arginine-rich spli 32 (0.00) | 39 (0.23) | 0.62      |      |
| 11-03 | Gp3 | g.chr2:182761670G>A  | Missense Mutation | SSFA2    | p.D115N  | sperm specific antigen 292 (0.00)   | 74 (0.26) | 0.68      |      |
| 11-03 | Gp3 | g.chr22:37603492G>A  | Silent            | SSTR3    | p.R117R  | somatostatin receptor 3 25 (0.00)   | 39 (0.26) | 0.68      |      |
| 11-03 | Gp3 | g.chrX:48118027G>A   | Missense Mutation | SSX1     | p.G81R   | synovial sarcoma, X bre 67 (0.00)   | 31 (0.52) | 0.86      |      |

|       |     |                      |                   |          |          |                                      |           |      |
|-------|-----|----------------------|-------------------|----------|----------|--------------------------------------|-----------|------|
| 11-03 | Gp3 | g.chrX:47978999G>T   | RNA               | SSX6     |          | synovial sarcoma, X bre 65 (0.02)    | 79 (0.24) | 0.40 |
| 11-03 | Gp3 | g.chr5:100231424C>A  | Missense Mutation | ST8SIA4  | p.G60V   | ST8 alpha-N-acetyl-neu 31 (0.00)     | 34 (0.15) | 0.39 |
| 11-03 | Gp3 | g.chr17:37370536G>A  | Silent            | STAC2    | p.Y297Y  | SH3 and cysteine rich d 23 (0.00)    | 29 (0.21) | 0.55 |
| 11-03 | Gp3 | g.chr3:136323151C>A  | Splice Site       | STAG1    | p.Q99H   | stromal antigen 1 66 (0.00)          | 37 (0.27) | 0.72 |
| 11-03 | Gp3 | g.chr2:96859010G>A   | Silent            | STARD7   | p.S210S  | StAR-related lipid trans: 56 (0.00)  | 60 (0.18) | 0.49 |
| 11-03 | Gp3 | g.chr15:42944745G>T  | Missense Mutation | STARD9   | p.E219D  | StAR-related lipid trans: 20 (0.00)  | 43 (0.28) | 0.54 |
| 11-03 | Gp3 | g.chr15:42980498G>T  | Missense Mutation | STARD9   | p.G2241V | StAR-related lipid trans: 39 (0.00)  | 27 (0.22) | 0.43 |
| 11-03 | Gp3 | g.chr7:89790557C>A   | Missense Mutation | STEAP1   | p.H175N  | six transmembrane epit 23 (0.00)     | 41 (0.24) | 0.65 |
| 11-03 | Gp3 | g.chr7:87913165C>T   | Nonsense Mutation | STEAP4   | p.W140*  | STEAP family member 40 (0.00)        | 21 (0.24) | 0.63 |
| 11-03 | Gp3 | g.chr11:125467004G>C | Missense Mutation | STT3A    | p.E47Q   | STT3A, subunit of the o 15 (0.00)    | 23 (0.30) | 0.81 |
| 11-03 | Gp3 | g.chr17:27014127C>A  | Missense Mutation | SUPT6H   | p.P908T  | suppressor of Ty 6 hom 34 (0.00)     | 33 (0.15) | 0.40 |
| 11-03 | Gp3 | g.chr10:70958161G>A  | Missense Mutation | SUPV3L1  | p.V353M  | suppressor of var1, 3-lik 50 (0.02)  | 58 (0.26) | 0.69 |
| 11-03 | Gp3 | g.chr10:70958170C>A  | Missense Mutation | SUPV3L1  | p.H356N  | suppressor of var1, 3-lik 50 (0.02)  | 56 (0.21) | 0.57 |
| 11-03 | Gp3 | g.chr11:67926581G>A  | Missense Mutation | SUV420H1 | p.T411M  | suppressor of variegatio 67 (0.00)   | 44 (0.23) | 0.61 |
| 11-03 | Gp3 | g.chr11:67926639C>A  | Splice Site       | SUV420H1 |          | suppressor of variegatio 57 (0.00)   | 34 (0.35) | 0.94 |
| 11-03 | Gp3 | g.chr5:75596700C>T   | Missense Mutation | SV2C     | p.P595S  | synaptic vesicle glycopr 88 (0.00)   | 66 (0.17) | 0.44 |
| 11-03 | Gp3 | g.chr1:25554699C>T   | Missense Mutation | SYF2     | p.E96K   | SYF2 pre-mRNA-splici 23 (0.00)       | 25 (0.20) | 0.53 |
| 11-03 | Gp3 | g.chr6:86347061C>A   | Missense Mutation | SYNCRIP  | p.R130I  | synaptotagmin binding, 17 (0.00)     | 17 (0.47) | 0.60 |
| 11-03 | Gp3 | g.chr6:152558007A>T  | Missense Mutation | SYNE1    | p.V6715E | spectrin repeat containir 47 (0.00)  | 40 (0.23) | 0.60 |
| 11-03 | Gp3 | g.chr6:152720798G>T  | Missense Mutation | SYNE1    | p.S2397Y | spectrin repeat containir 81 (0.00)  | 58 (0.24) | 0.64 |
| 11-03 | Gp3 | g.chr6:132891733C>T  | Silent            | TAAR6    | p.V91V   | trace amine associated r 51 (0.02)   | 33 (0.30) | 0.49 |
| 11-03 | Gp3 | g.chr9:32634239G>A   | Missense Mutation | TAF1L    | p.P447S  | TAF1 RNA polymerase 52 (0.00)        | 41 (0.54) | 1.43 |
| 11-03 | Gp3 | g.chr18:23969868G>A  | Silent            | TAF4B    | p.L827L  | TAF4b RNA polymeras 35 (0.00)        | 45 (0.42) | 1.13 |
| 11-03 | Gp3 | g.chr6:159462401G>A  | Silent            | TAGAP    | p.L154L  | T-cell activation RhoGI 60 (0.00)    | 41 (0.17) | 0.46 |
| 11-03 | Gp3 | g.chr11:763823C>A    | Missense Mutation | TALDO1   | p.F238L  | transaldolase 1 116 (0.00)           | 59 (0.15) | 0.41 |
| 11-03 | Gp3 | g.chr3:11858809C>A   | Missense Mutation | TAMM41   | p.D189Y  | TAM41, mitochondrial 27 (0.00)       | 25 (0.36) | 0.96 |
| 11-03 | Gp3 | g.chr17:61417516G>T  | Nonsense Mutation | TANC2    | p.E470*  | tetratricopeptide repeat, 148 (0.01) | 44 (0.27) | 0.73 |
| 11-03 | Gp3 | g.chr17:61466750C>T  | Nonsense Mutation | TANC2    | p.Q892*  | tetratricopeptide repeat, 19 (0.00)  | 29 (0.24) | 0.64 |
| 11-03 | Gp3 | g.chr16:68901110G>C  | Missense Mutation | TANGO6   | p.L327F  | transport and golgi orga 47 (0.02)   | 48 (0.35) | 0.94 |
| 11-03 | Gp3 | g.chr17:27844660G>A  | Missense Mutation | TAOK1    | p.D632N  | TAO kinase 1 26 (0.00)               | 16 (0.38) | 1.00 |
| 11-03 | Gp3 | g.chr1:19166623G>A   | Missense Mutation | TAS1R2   | p.R664C  | taste receptor, type 1, m 27 (0.00)  | 38 (0.16) | 0.42 |
| 11-03 | Gp3 | g.chr20:13463907C>A  | Missense Mutation | TASPI    | p.A318S  | taspase, threonine aspar 18 (0.00)   | 20 (0.30) | 0.80 |
| 11-03 | Gp3 | g.chr3:10311927C>A   | Missense Mutation | TATDN2   | p.P354H  | TatD DNase domain cor 117 (0.00)     | 43 (0.16) | 0.43 |
| 11-03 | Gp3 | g.chrX:48403365C>T   | Silent            | TBC1D25  | p.S114S  | TBC1 domain family, n 25 (0.00)      | 30 (0.23) | 0.39 |
| 11-03 | Gp3 | g.chr17:60345538C>A  | RNA               | TBC1D3P2 |          | TBC1 domain family, n 46 (0.00)      | 19 (0.42) | 1.12 |

|       |     |                      |                   |         |          |                          |            |           |      |
|-------|-----|----------------------|-------------------|---------|----------|--------------------------|------------|-----------|------|
| 11-03 | Gp3 | g.chr17:80879435C>T  | Silent            | TBCD    | p.H720H  | tubulin folding cofactor | 88 (0.00)  | 59 (0.15) | 0.41 |
| 11-03 | Gp3 | g.chr11:67400513C>T  | Missense Mutation | TBX10   | p.R204H  | T-box 10                 | 67 (0.00)  | 33 (0.15) | 0.40 |
| 11-03 | Gp3 | g.chr15:57523433C>T  | Silent            | TCF12   | p.F221F  | transcription factor 12  | 43 (0.00)  | 52 (0.27) | 0.72 |
| 11-03 | Gp3 | g.chr15:57574705G>A  | Missense Mutation | TCF12   | p.V681I  | transcription factor 12  | 38 (0.00)  | 42 (0.14) | 0.38 |
| 11-03 | Gp3 | g.chr6:44253727C>A   | Missense Mutation | TCTE1   | p.A274S  | t-complex-associated-te  | 19 (0.00)  | 25 (0.24) | 0.64 |
| 11-03 | Gp3 | g.chr10:115980424C>A | Silent            | TDRD1   | p.V864V  | tudor domain containing  | 33 (0.00)  | 23 (0.26) | 0.70 |
| 11-03 | Gp3 | g.chr19:33229799G>A  | Missense Mutation | TDRD12  | p.C74Y   | tudor domain containing  | 23 (0.00)  | 32 (0.19) | 0.50 |
| 11-03 | Gp3 | g.chr14:104460920C>A | Missense Mutation | TDRD9   | p.P434T  | tudor domain containing  | 21 (0.00)  | 16 (0.31) | 0.83 |
| 11-03 | Gp3 | g.chr11:12923617T>A  | Missense Mutation | TEAD1   | p.F181Y  | TEA domain family me     | 66 (0.00)  | 47 (0.30) | 0.79 |
| 11-03 | Gp3 | g.chr22:41790185C>G  | Silent            | TEF     | p.P187P  | thyrotrophic embryonic   | 20 (0.00)  | 25 (0.48) | 1.28 |
| 11-03 | Gp3 | g.chr22:41791868C>T  | Silent            | TEF     | p.N272N  | thyrotrophic embryonic   | 22 (0.00)  | 25 (0.20) | 0.53 |
| 11-03 | Gp3 | g.chr17:29227577C>T  | Missense Mutation | TEFM    | p.V167I  | transcription elongation | 46 (0.00)  | 61 (0.15) | 0.39 |
| 11-03 | Gp3 | g.chr17:15215705G>A  | Silent            | TEKT3   | p.D324D  | tektin 3                 | 51 (0.02)  | 34 (0.26) | 0.71 |
| 11-03 | Gp3 | g.chr12:55356258C>T  | Missense Mutation | TESPA1  | p.R475Q  | thymocyte expressed, p   | 52 (0.00)  | 22 (0.23) | 0.61 |
| 11-03 | Gp3 | g.chr1:36060057G>A   | Missense Mutation | TFAP2E  | p.R370H  | transcription factor AP  | 55 (0.00)  | 16 (0.31) | 0.83 |
| 11-03 | Gp3 | g.chr7:115750906T>A  | Missense Mutation | TFEC    | p.E18D   | transcription factor EC  | 71 (0.00)  | 37 (0.30) | 0.79 |
| 11-03 | Gp3 | g.chr7:100230631G>A  | Missense Mutation | TFR2    | p.A281V  | transferrin receptor 2   | 17 (0.00)  | 15 (0.33) | 0.89 |
| 11-03 | Gp3 | g.chr5:135390428C>A  | Missense Mutation | TGFBI   | p.H430N  | transforming growth fac  | 107 (0.01) | 64 (0.23) | 0.62 |
| 11-03 | Gp3 | g.chr1:92161317G>A   | Silent            | TGFBR3  | p.D783D  | transforming growth fac  | 22 (0.00)  | 28 (0.21) | 0.57 |
| 11-03 | Gp3 | g.chr3:44938259C>A   | Missense Mutation | TGM4    | p.P203H  | transglutaminase 4       | 24 (0.00)  | 26 (0.23) | 0.62 |
| 11-03 | Gp3 | g.chr2:85554387C>T   | Silent            | TGOLN2  | p.A156A  | trans-golgi network prot | 60 (0.00)  | 23 (0.26) | 0.53 |
| 11-03 | Gp3 | g.chr2:43571272C>T   | Nonsense Mutation | THADA   | p.W1444* | thyroid adenoma associ   | 52 (0.00)  | 60 (0.20) | 0.53 |
| 11-03 | Gp3 | g.chr2:43625174G>A   | Missense Mutation | THADA   | p.S1388F | thyroid adenoma associ   | 59 (0.00)  | 18 (0.39) | 1.04 |
| 11-03 | Gp3 | g.chr16:67877025C>A  | Missense Mutation | THAP11  | p.L190I  | THAP domain containir    | 16 (0.00)  | 43 (0.21) | 0.56 |
| 11-03 | Gp3 | g.chrX:122757091C>T  | Missense Mutation | THOC2   | p.E1183K | THO complex 2            | 27 (0.00)  | 14 (0.57) | 0.95 |
| 11-03 | Gp3 | g.chr7:11514029G>T   | Nonsense Mutation | THSD7A  | p.C728*  | thrombospondin, type I,  | 34 (0.00)  | 18 (0.28) | 0.74 |
| 11-03 | Gp3 | g.chr21:32502633C>A  | Splice Site       | TIAM1   | p.V1315L | T-cell lymphoma invasi   | 24 (0.00)  | 24 (0.21) | 0.56 |
| 11-03 | Gp3 | g.chr15:90166921C>T  | Missense Mutation | TICRR   | p.T1127I | TOPBP1-interacting ch    | 40 (0.00)  | 55 (0.25) | 0.68 |
| 11-03 | Gp3 | g.chr9:35723993C>G   | Missense Mutation | TLN1    | p.Q246H  | talin 1                  | 16 (0.00)  | 28 (0.29) | 0.76 |
| 11-03 | Gp3 | g.chr4:38798820C>T   | Missense Mutation | TLR1    | p.E545K  | toll-like receptor 1     | 71 (0.00)  | 38 (0.16) | 0.42 |
| 11-03 | Gp3 | g.chr13:100206623G>A | Silent            | TM9SF2  | p.T518T  | transmembrane 9 superf   | 51 (0.00)  | 37 (0.16) | 0.43 |
| 11-03 | Gp3 | g.chr15:81631846C>A  | Splice Site       | TMC3    |          | transmembrane channel    | 74 (0.00)  | 41 (0.15) | 0.39 |
| 11-03 | Gp3 | g.chr16:19492705C>A  | Missense Mutation | TMC5    | p.Q709K  | transmembrane channel    | 38 (0.00)  | 29 (0.17) | 0.46 |
| 11-03 | Gp3 | g.chr16:19032961C>A  | Silent            | TMC7    | p.G157G  | transmembrane channel    | 35 (0.00)  | 17 (0.35) | 0.94 |
| 11-03 | Gp3 | g.chr3:119155740A>G  | Missense Mutation | TMEM39A | p.L337P  | transmembrane protein    | 121 (0.00) | 67 (0.18) | 0.48 |

|       |     |                      |                   |          |          |                            |           |           |      |
|-------|-----|----------------------|-------------------|----------|----------|----------------------------|-----------|-----------|------|
| 11-03 | Gp3 | g.chr12:83379763C>A  | Missense Mutation | TMTC2    | p.L670M  | transmembrane and tetra    | 67 (0.00) | 36 (0.22) | 0.59 |
| 11-03 | Gp3 | g.chr1:201379564C>T  | Splice Site       | TNNI1    |          | troponin I type 1 (skelet  | 32 (0.00) | 26 (0.23) | 0.62 |
| 11-03 | Gp3 | g.chr7:128640500C>T  | Missense Mutation | TNPO3    | p.G266S  | transportin 3              | 39 (0.00) | 33 (0.15) | 0.40 |
| 11-03 | Gp3 | g.chr16:24801918C>G  | Missense Mutation | TNRC6A   | p.A652G  | trinucleotide repeat cont  | 43 (0.00) | 31 (0.23) | 0.60 |
| 11-03 | Gp3 | g.chr17:76046973G>A  | Silent            | TNRC6C   | p.G610G  | trinucleotide repeat cont  | 51 (0.00) | 35 (0.14) | 0.38 |
| 11-03 | Gp3 | g.chr17:76047012T>A  | Missense Mutation | TNRC6C   | p.S623R  | trinucleotide repeat cont  | 77 (0.00) | 37 (0.19) | 0.50 |
| 11-03 | Gp3 | g.chr9:32542037G>C   | Nonsense Mutation | TOPORS   | p.S829*  | topoisomerase I binding    | 89 (0.00) | 40 (0.25) | 0.67 |
| 11-03 | Gp3 | g.chr15:43712617G>A  | Missense Mutation | TP53BP1  | p.L1473F | tumor protein p53 bindin   | 86 (0.00) | 42 (0.21) | 0.41 |
| 11-03 | Gp3 | g.chr1:223983892C>A  | Silent            | TP53BP2  | p.V783V  | tumor protein p53 bindin   | 30 (0.00) | 17 (0.29) | 0.78 |
| 11-03 | Gp3 | g.chr2:24300561C>T   | Missense Mutation | TP53I3   | p.R296H  | tumor protein p53 induc    | 22 (0.00) | 27 (0.19) | 0.49 |
| 11-03 | Gp3 | g.chr12:72372751G>C  | Silent            | TPH2     | p.V275V  | tryptophan hydroxylase     | 40 (0.03) | 36 (0.19) | 0.52 |
| 11-03 | Gp3 | g.chr20:30371644G>A  | Missense Mutation | TPX2     | p.E445K  | TPX2, microtubule-assc     | 16 (0.00) | 23 (0.22) | 0.58 |
| 11-03 | Gp3 | g.chr2:239234591G>T  | Nonsense Mutation | TRAF3IP1 | p.G112*  | TNF receptor-associated    | 27 (0.00) | 28 (0.18) | 0.48 |
| 11-03 | Gp3 | g.chr3:49879887G>T   | Splice Site       | TRAIP    | p.Q168K  | TRAF interacting protei    | 34 (0.00) | 24 (0.25) | 0.67 |
| 11-03 | Gp3 | g.chr2:202262907G>T  | Silent            | TRAK2    | p.L217L  | trafficking protein, kine  | 29 (0.00) | 24 (0.33) | 0.89 |
| 11-03 | Gp3 | g.chr4:184601387G>C  | Silent            | TRAPPC11 | p.R360R  | trafficking protein partic | 31 (0.00) | 37 (0.19) | 0.50 |
| 11-03 | Gp3 | g.chr7:142378796G>C  | RNA               | TRBV25-1 |          | T cell receptor beta vari  | 35 (0.00) | 39 (0.31) | 0.47 |
| 11-03 | Gp3 | g.chr6:41185558G>T   | RNA               | TREML3P  |          | triggering receptor expr   | 57 (0.02) | 71 (0.17) | 0.45 |
| 11-03 | Gp3 | g.chr7:99490089G>T   | Missense Mutation | TRIM4    | p.D400E  | tripartite motif containir | 34 (0.00) | 32 (0.19) | 0.50 |
| 11-03 | Gp3 | g.chr11:49075405C>T  | Missense Mutation | TRIM64C  | p.G402D  | tripartite motif containir | 27 (0.00) | 22 (0.23) | 0.61 |
| 11-03 | Gp3 | g.chr2:230636293C>T  | Missense Mutation | TRIP12   | p.R1572K | thyroid hormone receptc    | 24 (0.00) | 27 (0.22) | 0.59 |
| 11-03 | Gp3 | g.chr1:185106757C>T  | Silent            | TRMT1L   | p.K498K  | tRNA methyltransferase     | 23 (0.00) | 21 (0.29) | 0.76 |
| 11-03 | Gp3 | g.chr14:61442574C>T  | Missense Mutation | TRMT5    | p.D355N  | tRNA methyltransferase     | 53 (0.00) | 43 (0.37) | 0.99 |
| 11-03 | Gp3 | g.chr22:46733834G>C  | Missense Mutation | TRMU     | p.V81L   | tRNA 5-methylaminom        | 83 (0.00) | 41 (0.15) | 0.39 |
| 11-03 | Gp3 | g.chr11:101362308G>C | Silent            | TRPC6    | p.A369A  | transient receptor potent  | 18 (0.00) | 34 (0.15) | 0.39 |
| 11-03 | Gp3 | g.chr21:45821697G>A  | Missense Mutation | TRPM2    | p.V819M  | transient receptor potent  | 18 (0.00) | 46 (0.33) | 0.87 |
| 11-03 | Gp3 | g.chr13:45149061C>T  | Missense Mutation | TSC22D1  | p.A384T  | TSC22 domain family, r     | 24 (0.00) | 19 (0.32) | 0.39 |
| 11-03 | Gp3 | g.chr19:31770012C>A  | Missense Mutation | TSHZ3    | p.L229F  | teashirt zinc finger hom   | 98 (0.01) | 82 (0.27) | 0.72 |
| 11-03 | Gp3 | g.chr6:116600202G>A  | Silent            | TSPYL1   | p.Y264Y  | TSPY-like 1                | 80 (0.00) | 21 (0.43) | 0.69 |
| 11-03 | Gp3 | g.chr17:2227518G>C   | Nonsense Mutation | TSR1     | p.S796*  | TSR1, 20S rRNA accun       | 28 (0.00) | 62 (0.26) | 0.69 |
| 11-03 | Gp3 | g.chr7:138833076C>T  | Missense Mutation | TTC26    | p.L193F  | tetratricopeptide repeat   | 17 (0.00) | 47 (0.47) | 1.25 |
| 11-03 | Gp3 | g.chr21:38537914C>G  | Missense Mutation | TTC3     | p.A1133G | tetratricopeptide repeat   | 27 (0.00) | 15 (0.33) | 0.89 |
| 11-03 | Gp3 | g.chr2:178482404G>A  | Silent            | TTC30A   | p.V342V  | tetratricopeptide repeat   | 87 (0.01) | 36 (0.33) | 0.44 |
| 11-03 | Gp3 | g.chr5:40716421G>A   | Silent            | TTC33    | p.D205D  | tetratricopeptide repeat   | 15 (0.00) | 19 (0.58) | 1.54 |
| 11-03 | Gp3 | g.chr22:46685795C>T  | Splice Site       | TTC38    | p.R439W  | tetratricopeptide repeat   | 15 (0.00) | 18 (0.44) | 1.19 |

|       |     |                      |                   |         |           |                                                      |           |      |
|-------|-----|----------------------|-------------------|---------|-----------|------------------------------------------------------|-----------|------|
| 11-03 | Gp3 | g.chr14:38222441G>A  | Splice Site       | TTC6    |           | tetratricopeptide repeat (30 (0.00)                  | 16 (0.31) | 0.83 |
| 11-03 | Gp3 | g.chr9:135266181C>A  | Silent            | TTF1    | p.R675R   | transcription terminator 68 (0.00)                   | 60 (0.35) | 0.93 |
| 11-03 | Gp3 | g.chr2:179415740G>T  | Missense Mutation | TTN     | p.S30506R | titin 50 (0.00)                                      | 29 (0.45) | 0.60 |
| 11-03 | Gp3 | g.chr2:179429645C>T  | Missense Mutation | TTN     | p.E27072K | titin 37 (0.00)                                      | 48 (0.46) | 0.61 |
| 11-03 | Gp3 | g.chr2:179459088G>T  | Missense Mutation | TTN     | p.T19378N | titin 90 (0.00)                                      | 46 (0.28) | 0.38 |
| 11-03 | Gp3 | g.chr12:49663757C>T  | Silent            | TUBA1C  | p.L125L   | tubulin, alpha 1c 47 (0.00)                          | 45 (0.16) | 0.41 |
| 11-03 | Gp3 | g.chr6:112393976C>A  | Missense Mutation | TUBE1   | p.R360L   | tubulin, epsilon 1 17 (0.00)                         | 23 (0.22) | 0.58 |
| 11-03 | Gp3 | g.chr22:31368951T>C  | RNA               | TUG1    |           | taurine up-regulated 1 (r37 (0.03)                   | 71 (0.27) | 0.71 |
| 11-03 | Gp3 | g.chr16:11785747G>C  | Missense Mutation | TXNDC11 | p.H433Q   | thioredoxin domain con125 (0.00)                     | 16 (0.44) | 1.17 |
| 11-03 | Gp3 | g.chrX:142967353G>A  | Missense Mutation | UBE2NL  | p.G51R    | ubiquitin-conjugating enzyme 42 (0.00)               | 18 (0.44) | 0.74 |
| 11-03 | Gp3 | g.chr1:19524266G>A   | Missense Mutation | UBR4    | p.P264L   | ubiquitin protein ligase 132 (0.00)                  | 66 (0.24) | 0.65 |
| 11-03 | Gp3 | g.chr1:20517869C>T   | Missense Mutation | UBXN10  | p.S272L   | UBX domain protein 1027 (0.00)                       | 19 (0.42) | 1.12 |
| 11-03 | Gp3 | g.chr4:39512029C>T   | Missense Mutation | UGDH    | p.V203I   | UDP-glucose 6-dehydrogenase 26 (0.00)                | 24 (0.21) | 0.56 |
| 11-03 | Gp3 | g.chr2:234628321G>A  | Silent            | UGT1A4  | p.K285K   | UDP glucuronosyltransferase 17 (0.00)                | 12 (0.50) | 1.33 |
| 11-03 | Gp3 | g.chr4:70152533G>A   | Missense Mutation | UGT2B28 | p.V312M   | UDP glucuronosyltransferase 70 (0.00)                | 72 (0.19) | 0.52 |
| 11-03 | Gp3 | g.chr9:35310762C>T   | Silent            | UNC13B  | p.L354L   | unc-13 homolog B (Caenorhabditis elegans) 32 (0.00)  | 24 (0.33) | 0.89 |
| 11-03 | Gp3 | g.chr2:210678563C>T  | Nonsense Mutation | UNC80   | p.Q400*   | unc-80 homolog (Caenorhabditis elegans) 57 (0.00)    | 59 (0.15) | 0.41 |
| 11-03 | Gp3 | g.chr2:210809892G>A  | Missense Mutation | UNC80   | p.E2319K  | unc-80 homolog (Caenorhabditis elegans) 25 (0.00)    | 35 (0.23) | 0.61 |
| 11-03 | Gp3 | g.chr2:210837032A>G  | Silent            | UNC80   | p.V2717V  | unc-80 homolog (Caenorhabditis elegans) 24 (0.00)    | 31 (0.19) | 0.52 |
| 11-03 | Gp3 | g.chr19:18960958C>A  | Missense Mutation | UPF1    | p.T179K   | UPF1 regulator of nonsense-mediated decay 21 (0.00)  | 37 (0.14) | 0.48 |
| 11-03 | Gp3 | g.chr3:179472571G>T  | Missense Mutation | USP13   | p.R617M   | ubiquitin specific peptidase 69 (0.00)               | 34 (0.18) | 0.47 |
| 11-03 | Gp3 | g.chr2:61415613G>A   | Missense Mutation | USP34   | p.S3422L  | ubiquitin specific peptidase 23 (0.00)               | 28 (0.36) | 0.95 |
| 11-03 | Gp3 | g.chr15:50838704G>A  | Missense Mutation | USP50   | p.L7F     | ubiquitin specific peptidase 57 (0.00)               | 31 (0.19) | 0.52 |
| 11-03 | Gp3 | g.chr10:75283448G>A  | Missense Mutation | USP54   | p.A752V   | ubiquitin specific peptidase 57 (0.00)               | 61 (0.15) | 0.39 |
| 11-03 | Gp3 | g.chr13:52604240C>T  | Missense Mutation | UTP14C  | p.L434F   | UTP14, U3 small nuclear ribonucleoprotein 119 (0.01) | 41 (0.15) | 0.39 |
| 11-03 | Gp3 | g.chr6:144812149G>T  | Missense Mutation | UTRN    | p.V1450L  | utrophin 69 (0.00)                                   | 34 (0.15) | 0.39 |
| 11-03 | Gp3 | g.chr14:77900623G>T  | Missense Mutation | VIPAS39 | p.N357K   | VPS33B interacting protein 37 (0.00)                 | 22 (0.27) | 0.73 |
| 11-03 | Gp3 | g.chr15:41195226G>A  | Missense Mutation | VPS18   | p.C870Y   | vacuolar protein sorting 21 (0.00)                   | 33 (0.18) | 0.48 |
| 11-03 | Gp3 | g.chr2:98736153G>A   | Missense Mutation | VWA3B   | p.D157N   | von Willebrand factor A46 (0.00)                     | 48 (0.17) | 0.44 |
| 11-03 | Gp3 | g.chr14:100826915C>T | Missense Mutation | WARS    | p.R133H   | tryptophanyl-tRNA synthetase 35 (0.00)               | 29 (0.17) | 0.46 |
| 11-03 | Gp3 | g.chr12:14946697C>T  | Missense Mutation | WBP11   | p.G294D   | WW domain binding protein 99 (0.01)                  | 87 (0.20) | 0.52 |
| 11-03 | Gp3 | g.chr7:71130426C>T   | Missense Mutation | WBSCR17 | p.L371F   | Williams-Beuren syndrome critical region 22 (0.00)   | 41 (0.12) | 0.43 |
| 11-03 | Gp3 | g.chr4:85742503T>C   | Missense Mutation | WDFY3   | p.N442S   | WD repeat and FYVE domain 19 (0.00)                  | 27 (0.22) | 0.59 |
| 11-03 | Gp3 | g.chr14:55455850G>T  | Silent            | WDHD1   | p.S474S   | WD repeat and HMG-box 23 (0.00)                      | 29 (0.17) | 0.46 |
| 11-03 | Gp3 | g.chr4:39207259G>A   | Missense Mutation | WDR19   | p.G265S   | WD repeat domain 19 29 (0.00)                        | 37 (0.49) | 1.30 |

|       |     |                     |                   |          |          |                           |            |           |      |
|-------|-----|---------------------|-------------------|----------|----------|---------------------------|------------|-----------|------|
| 11-03 | Gp3 | g.chr6:169982942G>T | Nonsense Mutation | WDR27    | p.S838*  | WD repeat domain 27       | 15 (0.00)  | 12 (0.42) | 1.11 |
| 11-03 | Gp3 | g.chr1:118494624C>T | Missense Mutation | WDR3     | p.S610F  | WD repeat domain 3        | 16 (0.00)  | 27 (0.67) | 1.78 |
| 11-03 | Gp3 | g.chr2:190332287C>T | Missense Mutation | WDR75    | p.A514V  | WD repeat domain 75       | 85 (0.00)  | 28 (0.39) | 1.05 |
| 11-03 | Gp3 | g.chr17:25639388G>A | Missense Mutation | WSB1     | p.R420H  | WD repeat and SOCS b      | 63 (0.02)  | 92 (0.29) | 0.78 |
| 11-03 | Gp3 | g.chr3:14191235C>G  | Intron            | XPC      |          | xeroderma pigmentosun     | 17 (0.00)  | 45 (0.18) | 0.47 |
| 11-03 | Gp3 | g.chr3:14198343G>C  | Intron            | XPC      |          | xeroderma pigmentosun     | 87 (0.00)  | 69 (0.14) | 0.39 |
| 11-03 | Gp3 | g.chr3:14203747C>A  | Intron            | XPC      |          | xeroderma pigmentosun     | 64 (0.00)  | 58 (0.17) | 0.46 |
| 11-03 | Gp3 | g.chr12:64818469G>A | Missense Mutation | XPOT     | p.A425T  | exportin, tRNA            | 17 (0.06)  | 33 (0.21) | 0.57 |
| 11-03 | Gp3 | g.chr12:64827356G>T | Missense Mutation | XPOT     | p.G809W  | exportin, tRNA            | 31 (0.00)  | 29 (0.21) | 0.55 |
| 11-03 | Gp3 | g.chr1:180772665G>A | Missense Mutation | XPR1     | p.R122H  | xenotropic and polytrop   | 92 (0.00)  | 64 (0.22) | 0.58 |
| 11-03 | Gp3 | g.chr7:152345956G>A | Missense Mutation | XRCC2    | p.S205L  | X-ray repair complemer    | 69 (0.01)  | 55 (0.22) | 0.58 |
| 11-03 | Gp3 | g.chr12:58345540G>A | Splice Site       | XRCC6BP1 |          | XRCC6 binding protein     | 38 (0.00)  | 51 (0.16) | 0.42 |
| 11-03 | Gp3 | g.chr3:101371687C>G | Missense Mutation | ZBTB11   | p.C802S  | zinc finger and BTB do    | 38 (0.00)  | 47 (0.19) | 0.51 |
| 11-03 | Gp3 | g.chr2:113081779G>A | Missense Mutation | ZC3H6    | p.G464E  | zinc finger CCCH-type     | 23 (0.00)  | 75 (0.23) | 0.60 |
| 11-03 | Gp3 | g.chrX:64196205C>T  | Splice Site       | ZC4H2    | p.R18K   | zinc finger, C4H2 doma    | 77 (0.00)  | 20 (0.30) | 0.50 |
| 11-03 | Gp3 | g.chr11:19197496C>T | Missense Mutation | ZDHHC13  | p.R620C  | zinc finger, DHHC-type    | 45 (0.00)  | 27 (0.22) | 0.59 |
| 11-03 | Gp3 | g.chr3:113675250C>T | Missense Mutation | ZDHHC23  | p.L313F  | zinc finger, DHHC-type    | 49 (0.00)  | 41 (0.15) | 0.39 |
| 11-03 | Gp3 | g.chr6:38084406G>A  | Silent            | ZFAND3   | p.T140T  | zinc finger, AN1-type d   | 46 (0.02)  | 54 (0.22) | 0.59 |
| 11-03 | Gp3 | g.chr8:77690561C>G  | Missense Mutation | ZFHX4    | p.H1071D | zinc finger homeobox 4    | 43 (0.00)  | 53 (0.19) | 0.50 |
| 11-03 | Gp3 | g.chr8:77766054C>A  | Silent            | ZFHX4    | p.L2299L | zinc finger homeobox 4    | 119 (0.01) | 83 (0.33) | 0.87 |
| 11-03 | Gp3 | g.chr19:57065981G>A | Silent            | ZFP28    | p.R609R  | ZFP28 zinc finger prote   | 29 (0.00)  | 59 (0.31) | 0.81 |
| 11-03 | Gp3 | g.chr19:57066228C>A | Missense Mutation | ZFP28    | p.Q692K  | ZFP28 zinc finger prote   | 35 (0.00)  | 29 (0.17) | 0.46 |
| 11-03 | Gp3 | g.chr19:38126685C>A | Missense Mutation | ZFP30    | p.V253F  | ZFP30 zinc finger prote   | 34 (0.00)  | 47 (0.15) | 0.50 |
| 11-03 | Gp3 | g.chrX:24228754C>T  | Missense Mutation | ZFX      | p.P560L  | zinc finger protein, X-li | 38 (0.00)  | 13 (0.38) | 0.64 |
| 11-03 | Gp3 | g.chr14:68249509C>T | Missense Mutation | ZFYVE26  | p.A1454T | zinc finger, FYVE dom     | 131 (0.00) | 39 (0.31) | 0.82 |
| 11-03 | Gp3 | g.chr8:124267013C>T | Missense Mutation | ZHX1     | p.G392S  | zinc fingers and homeo    | 26 (0.00)  | 45 (0.27) | 0.71 |
| 11-03 | Gp3 | g.chr16:25268223G>A | Missense Mutation | ZKSCAN2  | p.P76S   | zinc finger with KRAB     | 36 (0.00)  | 54 (0.30) | 0.79 |
| 11-03 | Gp3 | g.chr13:20567352A>T | Missense Mutation | ZMYM2    | p.N47I   | zinc finger, MYM-type     | 44 (0.00)  | 35 (0.17) | 0.46 |
| 11-03 | Gp3 | g.chr2:219508388C>T | Missense Mutation | ZNF142   | p.E951K  | zinc finger protein 142   | 35 (0.00)  | 26 (0.19) | 0.51 |
| 11-03 | Gp3 | g.chr2:219508511G>A | Missense Mutation | ZNF142   | p.P910S  | zinc finger protein 142   | 18 (0.00)  | 14 (0.36) | 0.95 |
| 11-03 | Gp3 | g.chr8:146156803C>T | Missense Mutation | ZNF16    | p.G457E  | zinc finger protein 16    | 31 (0.00)  | 14 (0.36) | 0.95 |
| 11-03 | Gp3 | g.chr19:35230454G>A | Missense Mutation | ZNF181   | p.V97M   | zinc finger protein 181   | 29 (0.00)  | 25 (0.28) | 0.75 |
| 11-03 | Gp3 | g.chr9:104170847G>T | Missense Mutation | ZNF189   | p.G266V  | zinc finger protein 189   | 109 (0.01) | 40 (0.17) | 0.47 |
| 11-03 | Gp3 | g.chr11:3380637G>A  | Missense Mutation | ZNF195   | p.S534F  | zinc finger protein 195   | 33 (0.00)  | 49 (0.18) | 0.49 |
| 11-03 | Gp3 | g.chr19:44570852G>A | Missense Mutation | ZNF223   | p.E401K  | zinc finger protein 223   | 32 (0.00)  | 33 (0.15) | 0.40 |

|       |     |                     |                   |         |          |                            |            |            |      |
|-------|-----|---------------------|-------------------|---------|----------|----------------------------|------------|------------|------|
| 11-03 | Gp3 | g.chr19:44512971G>T | Silent            | ZNF230  | p.V15V   | zinc finger protein 230    | 68 (0.00)  | 100 (0.32) | 0.85 |
| 11-03 | Gp3 | g.chr1:200377565T>A | Silent            | ZNF281  | p.T423T  | zinc finger protein 281    | 34 (0.00)  | 11 (0.55)  | 1.45 |
| 11-03 | Gp3 | g.chr19:44590269G>A | Missense Mutation | ZNF284  | p.S213N  | zinc finger protein 284    | 84 (0.00)  | 59 (0.22)  | 0.59 |
| 11-03 | Gp3 | g.chr19:35435336G>A | Missense Mutation | ZNF30   | p.C490Y  | zinc finger protein 30     | 45 (0.02)  | 38 (0.24)  | 0.63 |
| 11-03 | Gp3 | g.chr19:57868681A>T | Nonsense Mutation | ZNF304  | p.K482*  | zinc finger protein 304    | 17 (0.00)  | 29 (0.31)  | 0.83 |
| 11-03 | Gp3 | g.chr19:7585702G>A  | Missense Mutation | ZNF358  | p.S525N  | zinc finger protein 358    | 17 (0.00)  | 42 (0.19)  | 0.73 |
| 11-03 | Gp3 | g.chr3:21478531G>A  | Missense Mutation | ZNF385D | p.R202W  | zinc finger protein 385E45 | (0.00)     | 21 (0.24)  | 0.63 |
| 11-03 | Gp3 | g.chr18:72347341G>A | Missense Mutation | ZNF407  | p.E1456K | zinc finger protein 407    | 37 (0.00)  | 22 (0.23)  | 0.61 |
| 11-03 | Gp3 | g.chr18:72589202C>T | Silent            | ZNF407  | p.L1643L | zinc finger protein 407    | 29 (0.00)  | 12 (0.75)  | 2.00 |
| 11-03 | Gp3 | g.chr19:58441824C>T | Silent            | ZNF418  | p.L35L   | zinc finger protein 418    | 30 (0.00)  | 41 (0.20)  | 0.52 |
| 11-03 | Gp3 | g.chr19:52544771T>A | Missense Mutation | ZNF432  | p.D35V   | zinc finger protein 432    | 16 (0.00)  | 25 (0.20)  | 0.53 |
| 11-03 | Gp3 | g.chr1:23689505C>T  | Missense Mutation | ZNF436  | p.D124N  | zinc finger protein 436    | 45 (0.00)  | 93 (0.18)  | 0.49 |
| 11-03 | Gp3 | g.chr19:11942298G>A | Missense Mutation | ZNF440  | p.V103I  | zinc finger protein 440    | 27 (0.00)  | 36 (0.14)  | 0.47 |
| 11-03 | Gp3 | g.chr9:109689645C>A | Missense Mutation | ZNF462  | p.P1151H | zinc finger protein 462    | 123 (0.01) | 35 (0.17)  | 0.46 |
| 11-03 | Gp3 | g.chr19:32845002A>G | Silent            | ZNF507  | p.E422E  | zinc finger protein 507    | 52 (0.00)  | 46 (0.15)  | 0.41 |
| 11-03 | Gp3 | g.chr4:10446753T>A  | Silent            | ZNF518B | p.A400A  | zinc finger protein 518B72 | (0.00)     | 30 (0.17)  | 0.44 |
| 11-03 | Gp3 | g.chr18:22805909T>C | Missense Mutation | ZNF521  | p.D658G  | zinc finger protein 521    | 35 (0.00)  | 42 (0.14)  | 0.38 |
| 11-03 | Gp3 | g.chr19:58773675G>A | Missense Mutation | ZNF544  | p.R568K  | zinc finger protein 544    | 41 (0.00)  | 54 (0.31)  | 0.84 |
| 11-03 | Gp3 | g.chr19:2833810C>G  | Missense Mutation | ZNF554  | p.H193D  | zinc finger protein 554    | 26 (0.00)  | 52 (0.19)  | 0.74 |
| 11-03 | Gp3 | g.chr19:37211053C>T | Missense Mutation | ZNF567  | p.S476F  | zinc finger protein 567    | 18 (0.00)  | 25 (0.20)  | 0.67 |
| 11-03 | Gp3 | g.chr19:37975011C>T | Nonsense Mutation | ZNF570  | p.Q163*  | zinc finger protein 570    | 70 (0.00)  | 45 (0.22)  | 0.75 |
| 11-03 | Gp3 | g.chr19:37975048C>A | Missense Mutation | ZNF570  | p.P175Q  | zinc finger protein 570    | 61 (0.00)  | 43 (0.14)  | 0.47 |
| 11-03 | Gp3 | g.chr19:38230204G>A | Missense Mutation | ZNF573  | p.T396I  | zinc finger protein 573    | 49 (0.00)  | 31 (0.16)  | 0.54 |
| 11-03 | Gp3 | g.chr16:3487317G>T  | Missense Mutation | ZNF597  | p.P128T  | zinc finger protein 597    | 41 (0.00)  | 50 (0.20)  | 0.53 |
| 11-03 | Gp3 | g.chr15:64968186T>A | Missense Mutation | ZNF609  | p.S1045T | zinc finger protein 609    | 24 (0.00)  | 32 (0.16)  | 0.42 |
| 11-03 | Gp3 | g.chr9:116812396C>T | Silent            | ZNF618  | p.L938L  | zinc finger protein 618    | 118 (0.00) | 49 (0.24)  | 0.65 |
| 11-03 | Gp3 | g.chr1:91405562C>T  | Missense Mutation | ZNF644  | p.C450Y  | zinc finger protein 644    | 24 (0.00)  | 23 (0.22)  | 0.58 |
| 11-03 | Gp3 | g.chr1:91405571G>T  | Missense Mutation | ZNF644  | p.P447Q  | zinc finger protein 644    | 20 (0.00)  | 27 (0.26)  | 0.69 |
| 11-03 | Gp3 | g.chr20:45085511C>T | RNA               | ZNF663P |          | zinc finger protein 663,   | 20 (0.00)  | 30 (0.17)  | 0.44 |
| 11-03 | Gp3 | g.chr20:45085628C>T | RNA               | ZNF663P |          | zinc finger protein 663,   | 19 (0.00)  | 33 (0.15)  | 0.40 |
| 11-03 | Gp3 | g.chr19:9407225C>T  | Silent            | ZNF699  | p.G285G  | zinc finger protein 699    | 57 (0.00)  | 36 (0.14)  | 0.47 |
| 11-03 | Gp3 | g.chr15:90611816C>T | Missense Mutation | ZNF710  | p.L483F  | zinc finger protein 710    | 47 (0.00)  | 45 (0.20)  | 0.53 |
| 11-03 | Gp3 | g.chr4:436449G>C    | Missense Mutation | ZNF721  | p.H603D  | zinc finger protein 721    | 40 (0.03)  | 74 (0.30)  | 0.79 |
| 11-03 | Gp3 | g.chr19:22498949T>C | Silent            | ZNF729  | p.C910C  | zinc finger protein 729    | 52 (0.02)  | 64 (0.61)  | 1.62 |
| 11-03 | Gp3 | g.chr9:130207382C>A | Missense Mutation | ZNF79   | p.T468K  | zinc finger protein 79     | 43 (0.00)  | 41 (0.17)  | 0.46 |



|       |     |                      |                   |             |          |                            |           |           |      |
|-------|-----|----------------------|-------------------|-------------|----------|----------------------------|-----------|-----------|------|
| 11-03 | Gp3 | g.chr19:12738552G>A  | Missense Mutation | ZNF791      | p.D50N   | zinc finger protein 791    | 41 (0.00) | 59 (0.14) | 0.45 |
| 11-03 | Gp3 | g.chr16:21208863C>A  | Missense Mutation | ZP2         | p.V726L  | zona pellucida glycopro 34 | 4 (0.00)  | 27 (0.22) | 0.59 |
| 11-03 | Gp3 | g.chr1:238053368T>A  | Missense Mutation | ZP4         | p.Y95F   | zona pellucida glycopro 19 | 4 (0.00)  | 23 (0.26) | 0.70 |
| 11-03 | Gp3 | g.chr2:135965081G>A  | Missense Mutation | ZRANB3      | p.R978C  | zinc finger, RAN-binding   | 73 (0.00) | 81 (0.15) | 0.40 |
| 11-03 | Gp3 | g.chr6:28093328G>A   | Missense Mutation | ZSCAN16     | p.R36K   | zinc finger and SCAN d     | 64 (0.00) | 28 (0.29) | 0.58 |
| 11-03 | Gp4 | g.chr12:9246060C>T   | Splice Site       | A2M         |          | alpha-2-macroglobulin      | 40 (0.00) | 69 (0.16) | 0.53 |
| 11-03 | Gp4 | g.chr12:9268361G>C   | Splice Site       | A2M         | p.P29A   | alpha-2-macroglobulin      | 18 (0.00) | 25 (0.24) | 0.80 |
| 11-03 | Gp4 | g.chr12:125613909G>A | Silent            | AACS        | p.E484E  | acetoacetyl-CoA synthe     | 29 (0.03) | 64 (0.14) | 0.49 |
| 11-03 | Gp4 | g.chr20:34832701C>A  | Silent            | AAR2        | p.L280L  | AAR2 splicing factor hc    | 31 (0.00) | 15 (0.33) | 0.89 |
| 11-03 | Gp4 | g.chr9:107578486C>T  | Missense Mutation | ABCA1       | p.D1226N | ATP-binding cassette, s1   | 91 (0.00) | 31 (0.26) | 0.69 |
| 11-03 | Gp4 | g.chr9:107620824C>T  | Missense Mutation | ABCA1       | p.M233I  | ATP-binding cassette, s1   | 47 (0.00) | 33 (0.33) | 0.89 |
| 11-03 | Gp4 | g.chr9:107620966C>A  | Missense Mutation | ABCA1       | p.G186V  | ATP-binding cassette, s1   | 41 (0.00) | 25 (0.20) | 0.53 |
| 11-03 | Gp4 | g.chr7:48273670G>T   | Missense Mutation | ABCA13      | p.Q273H  | ATP-binding cassette, s1   | 67 (0.00) | 54 (0.28) | 0.74 |
| 11-03 | Gp4 | g.chr7:48431598G>A   | Missense Mutation | ABCA13      | p.R3912K | ATP-binding cassette, s1   | 35 (0.00) | 14 (0.36) | 0.95 |
| 11-03 | Gp4 | g.chr1:229661711C>A  | Silent            | ABCB10      | p.V626V  | ATP-binding cassette, s1   | 41 (0.00) | 43 (0.26) | 0.68 |
| 11-03 | Gp4 | g.chr7:87035683C>T   | Missense Mutation | ABCB4       | p.S1136N | ATP-binding cassette, s1   | 48 (0.00) | 22 (0.32) | 0.85 |
| 11-03 | Gp4 | g.chr2:220078003G>A  | Missense Mutation | ABCB6       | p.R589C  | ATP-binding cassette, s1   | 21 (0.00) | 14 (0.71) | 1.90 |
| 11-03 | Gp4 | g.chr16:48177949G>A  | Silent            | ABCC12      | p.A49A   | ATP-binding cassette, s1   | 37 (0.00) | 19 (0.42) | 1.12 |
| 11-03 | Gp4 | g.chr11:17434959C>A  | Missense Mutation | ABCC8       | p.Q819H  | ATP-binding cassette, s1   | 43 (0.00) | 23 (0.22) | 0.58 |
| 11-03 | Gp4 | g.chr3:43743969G>T   | Silent            | ABHD5       | p.V132V  | abhydrolase domain con     | 31 (0.03) | 33 (0.15) | 0.40 |
| 11-03 | Gp4 | g.chr17:47299503G>A  | Missense Mutation | ABI3        | p.G279R  | ABI family, member 3       | 40 (0.00) | 39 (0.15) | 0.41 |
| 11-03 | Gp4 | g.chr3:100469401G>C  | Missense Mutation | ABI3BP      | p.H1056D | ABI family, member 3 (     | 66 (0.00) | 19 (0.26) | 0.70 |
| 11-03 | Gp4 | g.chr2:34065209C>T   | lincRNA           | AC009499.1  |          |                            | 90 (0.00) | 44 (0.16) | 0.42 |
| 11-03 | Gp4 | g.chr17:16753367C>T  | RNA               | AC022596.2  |          |                            | 44 (0.00) | 22 (0.32) | 0.85 |
| 11-03 | Gp4 | g.chr2:217475496C>T  | lincRNA           | AC073321.4  |          |                            | 31 (0.00) | 12 (0.58) | 1.56 |
| 11-03 | Gp4 | g.chr2:89160490C>T   | RNA               | AC096579.13 |          |                            | 37 (0.00) | 17 (0.29) | 0.78 |
| 11-03 | Gp4 | g.chr17:35609927C>A  | Missense Mutation | ACACA       | p.R584L  | acetyl-CoA carboxylase     | 35 (0.00) | 27 (0.22) | 0.59 |
| 11-03 | Gp4 | g.chr12:112153696G>A | Missense Mutation | ACAD10      | p.D308N  | acyl-CoA dehydrogenas      | 51 (0.00) | 54 (0.17) | 0.58 |
| 11-03 | Gp4 | g.chr3:132277894C>T  | Missense Mutation | ACAD11      | p.G755E  | acyl-CoA dehydrogenas      | 51 (0.00) | 37 (0.19) | 0.50 |
| 11-03 | Gp4 | g.chr15:89401801C>T  | Silent            | ACAN        | p.S1995S | aggrecan                   | 34 (0.00) | 22 (0.23) | 0.61 |
| 11-03 | Gp4 | g.chr14:23547381G>A  | Missense Mutation | ACIN1       | p.S759L  | apoptotic chromatin con    | 86 (0.01) | 44 (0.16) | 0.42 |
| 11-03 | Gp4 | g.chr14:74062118A>C  | Missense Mutation | ACOT4       | p.L342F  | acyl-CoA thioesterase 4    | 23 (0.00) | 18 (0.33) | 0.89 |
| 11-03 | Gp4 | g.chr19:6156561C>T   | Splice Site       | ACSBG2      | p.S169L  | acyl-CoA synthetase bul    | 65 (0.00) | 85 (0.16) | 0.56 |
| 11-03 | Gp4 | g.chr19:6156562G>C   | Splice Site       | ACSBG2      | p.S169S  | acyl-CoA synthetase bul    | 65 (0.00) | 84 (0.12) | 0.40 |
| 11-03 | Gp4 | g.chr19:6183236C>T   | Silent            | ACSBG2      | p.S425S  | acyl-CoA synthetase bul    | 30 (0.00) | 21 (0.33) | 1.13 |

|       |     |                      |                   |          |          |                                    |           |      |
|-------|-----|----------------------|-------------------|----------|----------|------------------------------------|-----------|------|
| 11-03 | Gp4 | g.chrX:108908668C>T  | Silent            | ACSL4    | p.K457K  | acyl-CoA synthetase lor 24 (0.00)  | 16 (0.31) | 0.52 |
| 11-03 | Gp4 | g.chr16:20494380G>A  | Splice Site       | ACSM2A   | p.V504M  | acyl-CoA synthetase me 42 (0.00)   | 21 (0.43) | 1.14 |
| 11-03 | Gp4 | g.chr16:20554245G>T  | Silent            | ACSM2B   | p.V500V  | acyl-CoA synthetase me 25 (0.00)   | 37 (0.19) | 0.50 |
| 11-03 | Gp4 | g.chr16:20554263G>T  | Silent            | ACSM2B   | p.I494I  | acyl-CoA synthetase me 29 (0.00)   | 46 (0.15) | 0.41 |
| 11-03 | Gp4 | g.chr12:81536982C>T  | Missense Mutation | ACSS3    | p.P293S  | acyl-CoA synthetase sh 20 (0.00)   | 52 (0.15) | 0.52 |
| 11-03 | Gp4 | g.chr2:114691921G>A  | Silent            | ACTR3    | p.T166T  | ARP3 actin-related prot 60 (0.00)  | 31 (0.16) | 0.43 |
| 11-03 | Gp4 | g.chr2:9676867G>C    | Nonsense Mutation | ADAM17   | p.Y107*  | ADAM metallopeptidas 24 (0.00)     | 30 (0.20) | 0.53 |
| 11-03 | Gp4 | g.chr8:24181424C>A   | Silent            | ADAM28   | p.T266T  | ADAM metallopeptidas 16 (0.00)     | 13 (0.46) | 0.46 |
| 11-03 | Gp4 | g.chr1:120436670C>T  | Missense Mutation | ADAM30   | p.A764T  | ADAM metallopeptidas 105 (0.00)    | 80 (0.17) | 0.47 |
| 11-03 | Gp4 | g.chr5:33616020C>A   | Silent            | ADAMTS12 | p.L767L  | ADAM metallopeptidas 33 (0.00)     | 34 (0.18) | 0.47 |
| 11-03 | Gp4 | g.chr5:178634632C>A  | Missense Mutation | ADAMTS2  | p.R258L  | ADAM metallopeptidas 15 (0.00)     | 14 (0.43) | 1.14 |
| 11-03 | Gp4 | g.chr12:43858433C>T  | Silent            | ADAMTS20 | p.E490E  | ADAM metallopeptidas 25 (0.00)     | 26 (0.58) | 1.94 |
| 11-03 | Gp4 | g.chr12:43925967T>C  | Missense Mutation | ADAMTS20 | p.Y162C  | ADAM metallopeptidas 23 (0.00)     | 73 (0.12) | 0.42 |
| 11-03 | Gp4 | g.chr16:50349408C>A  | Missense Mutation | ADCY7    | p.L1079M | adenylate cyclase 7 17 (0.00)      | 19 (0.32) | 0.84 |
| 11-03 | Gp4 | g.chr8:131922044C>T  | Missense Mutation | ADCY8    | p.C517Y  | adenylate cyclase 8 (bra 26 (0.00) | 44 (0.82) | 2.18 |
| 11-03 | Gp4 | g.chr10:111892105C>T | Missense Mutation | ADD3     | p.S592L  | adducin 3 (gamma) 47 (0.00)        | 28 (0.21) | 0.57 |
| 11-03 | Gp4 | g.chr4:100232697C>T  | Nonsense Mutation | ADH1B    | p.W315*  | alcohol dehydrogenase 133 (0.00)   | 30 (0.20) | 0.53 |
| 11-03 | Gp4 | g.chr18:77893677C>T  | Silent            | ADNP2    | p.F127F  | ADNP homeobox 2 32 (0.00)          | 37 (0.16) | 0.43 |
| 11-03 | Gp4 | g.chr15:73044806C>A  | Missense Mutation | ADPGK    | p.R456I  | ADP-dependent glucoki 92 (0.01)    | 22 (0.23) | 0.61 |
| 11-03 | Gp4 | g.chr17:10608813C>T  | Silent            | ADPRM    | p.H190H  | ADP-ribose/CDP-alcohol 45 (0.00)   | 42 (0.17) | 0.44 |
| 11-03 | Gp4 | g.chr7:44150334G>T   | Missense Mutation | AEBP1    | p.V471L  | AE binding protein 1 77 (0.00)     | 85 (0.22) | 0.60 |
| 11-03 | Gp4 | g.chr10:75457389C>A  | Missense Mutation | AGAP5    | p.G42V   | ArfGAP with GTPase d 68 (0.00)     | 16 (0.31) | 0.83 |
| 11-03 | Gp4 | g.chr15:86687020C>A  | Missense Mutation | AGBL1    | p.P23Q   | ATP/GTP binding prote 42 (0.02)    | 88 (0.30) | 0.79 |
| 11-03 | Gp4 | g.chr11:47712013G>T  | Missense Mutation | AGBL2    | p.Q378K  | ATP/GTP binding prote 52 (0.00)    | 33 (0.18) | 0.48 |
| 11-03 | Gp4 | g.chr7:134678307G>T  | Missense Mutation | AGBL3    | p.G63V   | ATP/GTP binding prote 66 (0.00)    | 42 (0.21) | 0.57 |
| 11-03 | Gp4 | g.chr5:76357600G>A   | Silent            | AGGF1    | p.G639G  | angiogenic factor with C 45 (0.00) | 92 (0.16) | 0.43 |
| 11-03 | Gp4 | g.chr7:141296408C>A  | Missense Mutation | AGK      | p.A63D   | acylglycerol kinase 35 (0.00)      | 70 (0.21) | 0.57 |
| 11-03 | Gp4 | g.chr8:41476441G>T   | Missense Mutation | AGPAT6   | p.A403S  | 1-acylglycerol-3-phosph 40 (0.00)  | 31 (0.26) | 0.69 |
| 11-03 | Gp4 | g.chr5:35040722C>T   | Silent            | AGXT2    | p.K45K   | alanine--glyoxylate amin 37 (0.00) | 64 (0.23) | 0.62 |
| 11-03 | Gp4 | g.chr1:110558080G>A  | Missense Mutation | AHCYL1   | p.V237I  | adenosylhomocysteinas 27 (0.00)    | 26 (0.27) | 0.72 |
| 11-03 | Gp4 | g.chr1:27873850G>T   | Missense Mutation | AHDC1    | p.H1593N | AT hook, DNA binding 23 (0.00)     | 36 (0.22) | 0.59 |
| 11-03 | Gp4 | g.chr11:62300941G>T  | Silent            | AHNAK    | p.V316V  | AHNAK nucleoprotein 20 (0.00)      | 23 (0.39) | 1.04 |
| 11-03 | Gp4 | g.chr14:105405555C>T | Silent            | AHNAK2   | p.R409R  | AHNAK nucleoprotein 27 (0.00)      | 36 (0.33) | 0.89 |
| 11-03 | Gp4 | g.chr7:17349746T>A   | Splice Site       | AHR      | p.D84E   | aryl hydrocarbon recept 32 (0.00)  | 20 (0.30) | 0.80 |
| 11-03 | Gp4 | g.chr6:109814649G>A  | Nonsense Mutation | AK9      | p.Q1887* | adenylate kinase 9 24 (0.00)       | 42 (0.26) | 0.70 |

|       |     |                      |                   |             |          |                            |            |           |      |
|-------|-----|----------------------|-------------------|-------------|----------|----------------------------|------------|-----------|------|
| 11-03 | Gp4 | g.chrX:49957480G>T   | Missense Mutation | AKAP4       | p.N619K  | A kinase (PRKA) ancho      | 17 (0.00)  | 34 (0.53) | 0.88 |
| 11-03 | Gp4 | g.chr10:5046001C>T   | Silent            | AKR1C2      | p.K9K    | aldo-keto reductase fam    | 58 (0.00)  | 15 (0.47) | 1.24 |
| 11-03 | Gp4 | g.chr13:107773417G>T | RNA               | AL445204.1  |          |                            | 36 (0.00)  | 35 (0.26) | 0.69 |
| 11-03 | Gp4 | g.chr10:97373591C>A  | Missense Mutation | ALDH18A1    | p.A611S  | aldehyde dehydrogenase     | 44 (0.02)  | 49 (0.27) | 0.71 |
| 11-03 | Gp4 | g.chr9:75540416G>A   | Missense Mutation | ALDH1A1     | p.A206V  | aldehyde dehydrogenase     | 25 (0.00)  | 31 (0.29) | 0.77 |
| 11-03 | Gp4 | g.chr1:165632288C>A  | Nonstop Mutation  | ALDH9A1     | p.*519L  | aldehyde dehydrogenase     | 75 (0.00)  | 24 (0.33) | 0.89 |
| 11-03 | Gp4 | g.chr9:104189825G>T  | Missense Mutation | ALDOB       | p.S160Y  | aldolase B, fructose-bisph | 32 (0.00)  | 28 (0.18) | 0.48 |
| 11-03 | Gp4 | g.chr2:3745016C>T    | Nonsense Mutation | ALLC        | p.R274*  | allantoicase               | 38 (0.00)  | 48 (0.23) | 0.61 |
| 11-03 | Gp4 | g.chr2:73677354C>T   | Missense Mutation | ALMS1       | p.P1233S | Alstrom syndrome 1         | 62 (0.00)  | 49 (0.20) | 0.54 |
| 11-03 | Gp4 | g.chr2:73677426C>A   | Missense Mutation | ALMS1       | p.P1257T | Alstrom syndrome 1         | 70 (0.00)  | 51 (0.27) | 0.73 |
| 11-03 | Gp4 | g.chr2:73784412C>A   | Missense Mutation | ALMS1       | p.H3381N | Alstrom syndrome 1         | 33 (0.00)  | 42 (0.17) | 0.44 |
| 11-03 | Gp4 | g.chr4:113352488G>A  | Nonsense Mutation | ALPK1       | p.W595*  | alpha-kinase 1             | 23 (0.00)  | 13 (0.46) | 1.23 |
| 11-03 | Gp4 | g.chr18:56246061C>A  | Missense Mutation | ALPK2       | p.W649C  | alpha-kinase 2             | 42 (0.00)  | 48 (0.21) | 0.56 |
| 11-03 | Gp4 | g.chr12:85677448G>A  | Missense Mutation | ALX1        | p.G109R  | ALX homeobox 1             | 31 (0.00)  | 37 (0.14) | 0.45 |
| 11-03 | Gp4 | g.chr1:110050998C>T  | Silent            | AMIGO1      | p.K179K  | adhesion molecule with     | 80 (0.01)  | 44 (0.27) | 0.73 |
| 11-03 | Gp4 | g.chr1:115222954T>A  | Silent            | AMPD1       | p.P260P  | adenosine monophosphate    | 41 (0.00)  | 32 (0.19) | 0.50 |
| 11-03 | Gp4 | g.chr2:112566758C>T  | Splice Site       | ANAPC1      | p.G1200S | anaphase promoting con     | 53 (0.00)  | 21 (0.24) | 0.63 |
| 11-03 | Gp4 | g.chr9:140081958G>T  | Missense Mutation | ANAPC2      | p.Q239K  | anaphase promoting con     | 17 (0.00)  | 14 (0.50) | 1.33 |
| 11-03 | Gp4 | g.chr14:77272872C>A  | Missense Mutation | ANGEL1      | p.G423C  | angel homolog 1 (Droso     | 29 (0.00)  | 36 (0.19) | 0.52 |
| 11-03 | Gp4 | g.chr17:54559766A>G  | Missense Mutation | ANKFN1      | p.N717S  | ankyrin-repeat and fibro   | 56 (0.02)  | 33 (0.21) | 0.57 |
| 11-03 | Gp4 | g.chr17:4109634G>A   | Missense Mutation | ANKFY1      | p.H294Y  | ankyrin repeat and FYV     | 30 (0.00)  | 22 (0.23) | 0.61 |
| 11-03 | Gp4 | g.chr4:74008375A>T   | Missense Mutation | ANKRD17     | p.D689E  | ankyrin repeat domain      | 158 (0.00) | 61 (0.26) | 0.70 |
| 11-03 | Gp4 | g.chr9:67930395T>A   | Missense Mutation | ANKRD20A1   | p.L71Q   | ankyrin repeat domain      | 237 (0.00) | 36 (0.25) | 0.67 |
| 11-03 | Gp4 | g.chr18:14183687G>A  | RNA               | ANKRD20A5P  |          | ankyrin repeat domain      | 234 (0.00) | 30 (0.43) | 1.16 |
| 11-03 | Gp4 | g.chr4:125593285C>A  | Nonsense Mutation | ANKRD50     | p.E383*  | ankyrin repeat domain      | 516 (0.00) | 51 (0.20) | 0.52 |
| 11-03 | Gp4 | g.chr12:100048903C>A | Missense Mutation | ANKS1B      | p.W405L  | ankyrin repeat and steril  | 20 (0.00)  | 71 (0.11) | 0.38 |
| 11-03 | Gp4 | g.chr12:99640154C>T  | Missense Mutation | ANKS1B      | p.E749K  | ankyrin repeat and steril  | 92 (0.00)  | 59 (0.34) | 1.15 |
| 11-03 | Gp4 | g.chr7:36492158T>A   | Missense Mutation | ANLN        | p.D1108E | anillin, actin binding pr  | 31 (0.00)  | 40 (0.15) | 0.40 |
| 11-03 | Gp4 | g.chr12:101491644C>T | Missense Mutation | ANO4        | p.L608F  | anoctamin 4                | 20 (0.00)  | 46 (0.20) | 0.67 |
| 11-03 | Gp4 | g.chr21:28740044G>A  | lincRNA           | AP001604.3  |          |                            | 16 (0.00)  | 18 (0.50) | 1.33 |
| 11-03 | Gp4 | g.chr11:64942552C>T  | RNA               | AP003068.18 |          |                            | 50 (0.00)  | 10 (0.50) | 1.33 |
| 11-03 | Gp4 | g.chr21:11181671G>A  | lincRNA           | AP003900.6  |          |                            | 37 (0.03)  | 23 (0.22) | 0.58 |
| 11-03 | Gp4 | g.chr16:71768576C>A  | Missense Mutation | AP1G1       | p.S768I  | adaptor-related protein    | c28 (0.00) | 19 (0.26) | 0.70 |
| 11-03 | Gp4 | g.chr11:970193G>A    | Missense Mutation | AP2A2       | p.S54N   | adaptor-related protein    | c58 (0.00) | 50 (0.38) | 1.01 |
| 11-03 | Gp4 | g.chr5:112179285C>A  | Missense Mutation | APC         | p.P2665H | adenomatous polyposis      | 129 (0.00) | 31 (0.19) | 0.52 |

|       |     |                      |                   |           |          |                                                |             |            |      |
|-------|-----|----------------------|-------------------|-----------|----------|------------------------------------------------|-------------|------------|------|
| 11-03 | Gp4 | g.chr2:21231703C>A   | Missense Mutation | APOB      | p.M2679I | apolipoprotein B                               | 49 (0.00)   | 27 (0.22)  | 0.59 |
| 11-03 | Gp4 | g.chr6:41029236G>A   | Missense Mutation | APOBEC2   | p.E101K  | apolipoprotein B mRNA                          | 29 (0.00)   | 40 (0.23)  | 0.60 |
| 11-03 | Gp4 | g.chr22:36587791C>T  | Missense Mutation | APOL4     | p.C126Y  | apolipoprotein L, 4                            | 16 (0.00)   | 15 (0.40)  | 1.07 |
| 11-03 | Gp4 | g.chr1:154293649C>T  | Silent            | AQP10     | p.A6A    | aquaporin 10                                   | 44 (0.00)   | 33 (0.18)  | 0.48 |
| 11-03 | Gp4 | g.chr5:141033987G>A  | Nonsense Mutation | ARAP3     | p.Q1220* | ArfGAP with RhoGAP                             | 16 (0.00)   | 17 (0.29)  | 0.78 |
| 11-03 | Gp4 | g.chr5:141033994C>T  | Silent            | ARAP3     | p.K1217K | ArfGAP with RhoGAP                             | 15 (0.00)   | 19 (0.26)  | 0.70 |
| 11-03 | Gp4 | g.chr3:121305370G>T  | Missense Mutation | ARGFX     | p.A291S  | arginine-fifty homeobox                        | 35 (0.00)   | 41 (0.17)  | 0.46 |
| 11-03 | Gp4 | g.chr15:32925235C>T  | Silent            | ARHGAP11A | p.L198L  | Rho GTPase activating j                        | 16 (0.00)   | 45 (0.24)  | 0.65 |
| 11-03 | Gp4 | g.chr16:24942223T>A  | Silent            | ARHGAP17  | p.P799P  | Rho GTPase activating j                        | 17 (0.00)   | 24 (0.25)  | 0.67 |
| 11-03 | Gp4 | g.chr6:129959555C>T  | Missense Mutation | ARHGAP18  | p.R179K  | Rho GTPase activating j                        | 33 (0.00)   | 34 (0.38)  | 0.40 |
| 11-03 | Gp4 | g.chr11:128868247G>A | Silent            | ARHGAP32  | p.L25L   | Rho GTPase activating j                        | 108 (0.00)  | 70 (0.14)  | 0.38 |
| 11-03 | Gp4 | g.chr11:128868279C>T | Missense Mutation | ARHGAP32  | p.G14E   | Rho GTPase activating j                        | 111 (0.00)  | 97 (0.15)  | 0.41 |
| 11-03 | Gp4 | g.chr19:47424945C>T  | Silent            | ARHGAP35  | p.L1005L | Rho GTPase activating j                        | 77 (0.00)   | 72 (0.32)  | 0.85 |
| 11-03 | Gp4 | g.chrX:130219994G>T  | Silent            | ARHGAP36  | p.G392G  | Rho GTPase activating j                        | 30 (0.00)   | 24 (0.25)  | 0.42 |
| 11-03 | Gp4 | g.chr11:73071412C>T  | Silent            | ARHGEP17  | p.D1418D | Rho guanine nucleotide                         | 22 (0.05)   | 17 (0.65)  | 1.73 |
| 11-03 | Gp4 | g.chr1:27094450G>C   | Missense Mutation | ARID1A    | p.R1053P | AT rich interactive dom                        | 42 (0.00)   | 48 (0.15)  | 0.39 |
| 11-03 | Gp4 | g.chr6:157528913C>T  | Missense Mutation | ARID1B    | p.S2213L | AT rich interactive dom                        | 39 (0.00)   | 41 (0.17)  | 0.46 |
| 11-03 | Gp4 | g.chr12:46244728C>A  | Missense Mutation | ARID2     | p.P941Q  | AT rich interactive dom                        | 101 (0.00)  | 72 (0.14)  | 0.47 |
| 11-03 | Gp4 | g.chr6:109179425C>T  | Missense Mutation | ARMC2     | p.S81L   | armadillo repeat contain                       | 23 (0.00)   | 53 (0.19)  | 0.50 |
| 11-03 | Gp4 | g.chr10:28223999G>T  | Missense Mutation | ARMC4     | p.A812D  | armadillo repeat contain                       | 16 (0.00)   | 17 (0.29)  | 0.78 |
| 11-03 | Gp4 | g.chr2:25965888G>A   | Silent            | ASXL2     | p.F1106F | additional sex combs lik                       | 86 (0.00)   | 48 (0.29)  | 0.78 |
| 11-03 | Gp4 | g.chr18:31324142C>A  | Silent            | ASXL3     | p.R1444R | additional sex combs lik                       | 42 (0.00)   | 27 (0.37)  | 0.99 |
| 11-03 | Gp4 | g.chr18:31325531C>T  | Nonsense Mutation | ASXL3     | p.Q1907* | additional sex combs lik                       | 157 (0.01)  | 104 (0.15) | 0.41 |
| 11-03 | Gp4 | g.chr8:124349966C>T  | Missense Mutation | ATAD2     | p.D302N  | ATPase family, AAA do                          | 47 (0.00)   | 29 (0.21)  | 0.55 |
| 11-03 | Gp4 | g.chr3:193183909G>A  | Nonsense Mutation | ATP13A4   | p.Q393*  | ATPase type 13A4                               | 52 (0.00)   | 52 (0.38)  | 1.03 |
| 11-03 | Gp4 | g.chr1:116946586G>A  | Missense Mutation | ATP1A1    | p.R1011Q | ATPase, Na <sup>+</sup> /K <sup>+</sup> transp | 52 (0.00)   | 23 (0.35)  | 0.93 |
| 11-03 | Gp4 | g.chr14:92563114C>A  | Silent            | ATXN3     | p.V31V   | ataxin 3                                       | 95 (0.00)   | 61 (0.28)  | 0.74 |
| 11-03 | Gp4 | g.chr7:70227897C>T   | Nonsense Mutation | AUTS2     | p.Q262*  | autism susceptibility car                      | 25 (0.00)   | 31 (0.19)  | 0.52 |
| 11-03 | Gp4 | g.chrX:69460090C>T   | Missense Mutation | AWAT1     | p.H313Y  | acyl-CoA wax alcohol a                         | 39 (0.00)   | 47 (0.26)  | 0.43 |
| 11-03 | Gp4 | g.chr3:28368342G>A   | Silent            | AZI2      | p.T249T  | 5-azacytidine induced                          | 2 29 (0.00) | 25 (0.36)  | 0.96 |
| 11-03 | Gp4 | g.chr1:235628956G>T  | Missense Mutation | B3GALNT2  | p.Q280K  | beta-1,3-N-acetylgalact                        | 41 (0.00)   | 37 (0.16)  | 0.43 |
| 11-03 | Gp4 | g.chr21:11047628T>A  | RNA               | BAGE2     |          | B melanoma antigen far                         | 28 (0.00)   | 40 (0.15)  | 0.40 |
| 11-03 | Gp4 | g.chr20:52601880G>A  | Silent            | BCAS1     | p.T362T  | breast carcinoma amplif                        | 26 (0.00)   | 58 (0.21)  | 0.55 |
| 11-03 | Gp4 | g.chr6:136597151C>T  | Silent            | BCLAF1    | p.K504K  | BCL2-associated transcr                        | 52 (0.00)   | 29 (0.24)  | 0.64 |
| 11-03 | Gp4 | g.chr17:40963680G>A  | Missense Mutation | BECN1     | p.P393S  | beclin 1, autophagy rela                       | 34 (0.00)   | 29 (0.21)  | 0.55 |

|       |     |                      |                   |        |          |                           |            |      |
|-------|-----|----------------------|-------------------|--------|----------|---------------------------|------------|------|
| 11-03 | Gp4 | g.chr4:42122284G>A   | Missense Mutation | BEND4  | p.P392S  | BEN domain containing 37  | 39 (0.51)  | 1.37 |
| 11-03 | Gp4 | g.chr12:32481052C>G  | Missense Mutation | BICD1  | p.P555A  | bicaudal D homolog 1      | 148 (0.00) | 0.62 |
| 11-03 | Gp4 | g.chr15:91261598C>T  | Intron            | BLM    |          | Bloom syndrome, RecQ 99   | 54 (0.24)  | 0.64 |
| 11-03 | Gp4 | g.chr15:91301865C>A  | Intron            | BLM    |          | Bloom syndrome, RecQ 20   | 90 (0.29)  | 0.77 |
| 11-03 | Gp4 | g.chr15:91304950T>C  | Intron            | BLM    |          | Bloom syndrome, RecQ 65   | 53 (0.21)  | 0.55 |
| 11-03 | Gp4 | g.chr15:91318537A>T  | Intron            | BLM    |          | Bloom syndrome, RecQ 29   | 105 (0.30) | 0.81 |
| 11-03 | Gp4 | g.chr15:91324217G>A  | Intron            | BLM    |          | Bloom syndrome, RecQ 22   | 17 (0.35)  | 0.94 |
| 11-03 | Gp4 | g.chr15:91331358G>A  | Intron            | BLM    |          | Bloom syndrome, RecQ 21   | 35 (0.14)  | 0.38 |
| 11-03 | Gp4 | g.chr15:91352362C>T  | Intron            | BLM    |          | Bloom syndrome, RecQ 40   | 23 (0.22)  | 0.58 |
| 11-03 | Gp4 | g.chr15:91354134G>A  | Intron            | BLM    |          | Bloom syndrome, RecQ 47   | 12 (0.42)  | 1.11 |
| 11-03 | Gp4 | g.chr7:34094798G>A   | Silent            | BMPER  | p.R270R  | BMP binding endothelial   | 18 (0.00)  | 0.48 |
| 11-03 | Gp4 | g.chr4:96075722C>A   | Silent            | BMPR1B | p.L469L  | bone morphogenetic pro    | 40 (0.00)  | 0.50 |
| 11-03 | Gp4 | g.chr15:83926343G>T  | Missense Mutation | BNC1   | p.H939N  | basonuclin 1              | 65 (0.00)  | 0.42 |
| 11-03 | Gp4 | g.chr9:16418987C>A   | Nonstop Mutation  | BNC2   | p.*1100Y | basonuclin 2              | 68 (0.00)  | 0.95 |
| 11-03 | Gp4 | g.chr10:133787409C>T | Missense Mutation | BNIP3  | p.G29R   | BCL2/adenovirus E1B 145   | 17 (0.47)  | 1.25 |
| 11-03 | Gp4 | g.chr4:13579075G>A   | Missense Mutation | BOD1L1 | p.R2946W | biorientation of chromo   | 36 (0.00)  | 0.74 |
| 11-03 | Gp4 | g.chr4:13602120C>T   | Missense Mutation | BOD1L1 | p.S2135N | biorientation of chromo   | 52 (0.00)  | 0.38 |
| 11-03 | Gp4 | g.chr4:13603275C>A   | Missense Mutation | BOD1L1 | p.R1750L | biorientation of chromo   | 58 (0.02)  | 1.28 |
| 11-03 | Gp4 | g.chr4:13603342T>A   | Missense Mutation | BOD1L1 | p.T1728S | biorientation of chromo   | 40 (0.03)  | 0.96 |
| 11-03 | Gp4 | g.chr20:31828078G>A  | Silent            | BPIFA1 | p.K156K  | BPI fold containing fam   | 52 (0.02)  | 0.74 |
| 11-03 | Gp4 | g.chr7:140508737C>T  | Missense Mutation | BRAF   | p.R188K  | B-Raf proto-oncogene, ε   | 26 (0.00)  | 0.73 |
| 11-03 | Gp4 | g.chr12:112097112C>A | Missense Mutation | BRAP   | p.C307F  | BRCA1 associated prot     | 39 (0.00)  | 0.51 |
| 11-03 | Gp4 | g.chr17:41204180C>A  | Intron            | BRCA1  |          | breast cancer 1, early on | 21 (0.00)  | 0.67 |
| 11-03 | Gp4 | g.chr17:41221519C>G  | Intron            | BRCA1  |          | breast cancer 1, early on | 91 (0.01)  | 0.57 |
| 11-03 | Gp4 | g.chr17:41222485C>T  | Intron            | BRCA1  |          | breast cancer 1, early on | 43 (0.00)  | 0.44 |
| 11-03 | Gp4 | g.chr17:41231417C>A  | Intron            | BRCA1  |          | breast cancer 1, early on | 79 (0.00)  | 0.55 |
| 11-03 | Gp4 | g.chr17:41268981T>A  | Intron            | BRCA1  |          | breast cancer 1, early on | 38 (0.00)  | 0.97 |
| 11-03 | Gp4 | g.chr13:32927822G>T  | Intron            | BRCA2  |          | breast cancer 2, early on | 38 (0.00)  | 0.52 |
| 11-03 | Gp4 | g.chr5:137500629C>T  | Missense Mutation | BRD8   | p.R502K  | bromodomain containin     | 35 (0.00)  | 0.86 |
| 11-03 | Gp4 | g.chr5:137500649T>C  | Missense Mutation | BRD8   | p.I495M  | bromodomain containin     | 36 (0.00)  | 0.43 |
| 11-03 | Gp4 | g.chr5:137503643G>T  | Missense Mutation | BRD8   | p.A256E  | bromodomain containin     | 30 (0.00)  | 0.83 |
| 11-03 | Gp4 | g.chr12:125497173G>C | Missense Mutation | BRI3BP | p.G103R  | BRI3 binding protein      | 52 (0.00)  | 0.86 |
| 11-03 | Gp4 | g.chr6:36196712C>A   | Missense Mutation | BRPF3  | p.L1105M | bromodomain and PHD       | 28 (0.00)  | 0.46 |
| 11-03 | Gp4 | g.chr3:49693081G>A   | Missense Mutation | BSN    | p.R2031H | bassoon presynaptic cyt   | 32 (0.00)  | 0.45 |
| 11-03 | Gp4 | g.chr10:93741976C>A  | Missense Mutation | BTAF1  | p.A681E  | BTAF1 RNA polymera        | 17 (0.00)  | 0.38 |

|       |     |                      |                   |           |          |                          |            |            |      |
|-------|-----|----------------------|-------------------|-----------|----------|--------------------------|------------|------------|------|
| 11-03 | Gp4 | g.chr11:13410422C>A  | Missense Mutation | BTBD10    | p.G470C  | BTB (POZ) domain con     | 51 (0.00)  | 32 (0.25)  | 0.67 |
| 11-03 | Gp4 | g.chr20:11900411G>A  | Missense Mutation | BTBD3     | p.G155R  | BTB (POZ) domain con     | 41 (0.00)  | 50 (0.20)  | 0.53 |
| 11-03 | Gp4 | g.chr5:180483008C>T  | Silent            | BTNL9     | p.G316G  | butyrophilin-like 9      | 20 (0.00)  | 26 (0.42)  | 1.13 |
| 11-03 | Gp4 | g.chr10:103294593C>T | Missense Mutation | BTRC      | p.H425Y  | beta-transducin repeat c | 62 (0.00)  | 63 (0.14)  | 0.38 |
| 11-03 | Gp4 | g.chr15:40494880G>A  | Silent            | BUB1B     | p.V573V  | BUB1 mitotic checkpoi    | 41 (0.00)  | 27 (0.22)  | 0.59 |
| 11-03 | Gp4 | g.chr7:16737766C>A   | Missense Mutation | BZW2      | p.H355N  | basic leucine zipper and | 44 (0.02)  | 65 (0.38)  | 1.03 |
| 11-03 | Gp4 | g.chr10:19620454C>T  | Silent            | C10orf112 | p.L578L  |                          | 16 (0.00)  | 42 (0.17)  | 0.44 |
| 11-03 | Gp4 | g.chr10:19636816C>G  | Missense Mutation | C10orf112 | p.P636A  |                          | 34 (0.00)  | 54 (0.28)  | 0.74 |
| 11-03 | Gp4 | g.chr10:50531833C>A  | Missense Mutation | C10orf71  | p.H415N  | chromosome 10 open re    | 112 (0.00) | 24 (0.21)  | 0.56 |
| 11-03 | Gp4 | g.chr11:62437470C>G  | Missense Mutation | C11orf48  | p.G12R   | chromosome 11 open re    | 16 (0.00)  | 26 (0.23)  | 0.62 |
| 11-03 | Gp4 | g.chr11:62437491G>A  | Missense Mutation | C11orf48  | p.P5S    | chromosome 11 open re    | 15 (0.00)  | 25 (0.20)  | 0.53 |
| 11-03 | Gp4 | g.chr11:36669607A>T  | Missense Mutation | C11orf74  | p.T134S  | chromosome 11 open re    | 24 (0.00)  | 43 (0.33)  | 0.87 |
| 11-03 | Gp4 | g.chr12:103699827C>G | Missense Mutation | C12orf42  | p.E186Q  | chromosome 12 open re    | 53 (0.00)  | 40 (0.12)  | 0.43 |
| 11-03 | Gp4 | g.chr14:50559328C>A  | Missense Mutation | C14orf183 | p.D12Y   | chromosome 14 open re    | 97 (0.00)  | 58 (0.45)  | 1.20 |
| 11-03 | Gp4 | g.chr16:67168297C>A  | Silent            | C16orf70  | p.V196V  | chromosome 16 open re    | 71 (0.00)  | 40 (0.23)  | 0.60 |
| 11-03 | Gp4 | g.chr16:4793048T>A   | Missense Mutation | C16orf71  | p.L277H  | chromosome 16 open re    | 16 (0.00)  | 21 (0.38)  | 1.02 |
| 11-03 | Gp4 | g.chr17:42744499C>A  | Missense Mutation | C17orf104 | p.A407E  | chromosome 17 open re    | 62 (0.00)  | 31 (0.26)  | 0.69 |
| 11-03 | Gp4 | g.chr17:30666870G>C  | Silent            | C17orf75  | p.V103V  | chromosome 17 open re    | 105 (0.00) | 96 (0.18)  | 0.47 |
| 11-03 | Gp4 | g.chr17:35742986C>T  | Missense Mutation | C17orf78  | p.A144V  | chromosome 17 open re    | 68 (0.00)  | 60 (0.15)  | 0.40 |
| 11-03 | Gp4 | g.chr1:172417595C>T  | Missense Mutation | C1orf105  | p.S41F   | chromosome 1 open rea    | 75 (0.00)  | 66 (0.15)  | 0.40 |
| 11-03 | Gp4 | g.chr1:53684159C>T   | Silent            | C1orf123  | p.V52V   | chromosome 1 open rea    | 22 (0.00)  | 18 (0.33)  | 0.89 |
| 11-03 | Gp4 | g.chr5:159776296T>G  | Missense Mutation | C1QTNF2   | p.E291A  | C1q and tumor necrosis   | 56 (0.00)  | 42 (0.31)  | 0.83 |
| 11-03 | Gp4 | g.chr20:20056156G>A  | Missense Mutation | C20orf26  | p.D155N  |                          | 33 (0.00)  | 34 (0.47)  | 1.25 |
| 11-03 | Gp4 | g.chr11:73801887G>A  | Silent            | C2CD3     | p.I1204I | C2 calcium-dependent d   | 35 (0.00)  | 19 (0.37)  | 0.98 |
| 11-03 | Gp4 | g.chr12:22646200C>G  | Missense Mutation | C2CD5     | p.G407R  | C2 calcium-dependent d   | 21 (0.00)  | 39 (0.44)  | 1.46 |
| 11-03 | Gp4 | g.chr2:106690370C>T  | Silent            | C2orf40   | p.A16A   | chromosome 2 open rea    | 67 (0.01)  | 41 (0.37)  | 0.98 |
| 11-03 | Gp4 | g.chr3:63805244G>A   | Missense Mutation | C3orf49   | p.G33S   | chromosome 3 open rea    | 55 (0.00)  | 34 (0.26)  | 0.71 |
| 11-03 | Gp4 | g.chr4:37591744G>A   | Missense Mutation | C4orf19   | p.G23S   | chromosome 4 open rea    | 81 (0.01)  | 115 (0.29) | 0.77 |
| 11-03 | Gp4 | g.chr4:113540455T>A  | Missense Mutation | C4orf21   | p.N248I  |                          | 32 (0.00)  | 28 (0.32)  | 0.86 |
| 11-03 | Gp4 | g.chr4:113540845C>T  | Splice Site       | C4orf21   | p.G118D  |                          | 16 (0.00)  | 20 (0.30)  | 0.80 |
| 11-03 | Gp4 | g.chr4:130023907G>C  | Missense Mutation | C4orf33   | p.E48Q   | chromosome 4 open rea    | 24 (0.00)  | 27 (0.33)  | 0.89 |
| 11-03 | Gp4 | g.chr9:123737185G>T  | Missense Mutation | C5        | p.L1297M | complement component     | 48 (0.00)  | 26 (0.31)  | 0.82 |
| 11-03 | Gp4 | g.chr5:43453844G>A   | Silent            | C5orf28   | p.D76D   | chromosome 5 open rea    | 19 (0.00)  | 21 (0.29)  | 0.76 |
| 11-03 | Gp4 | g.chr5:43509305G>C   | Missense Mutation | C5orf34   | p.P46R   | chromosome 5 open rea    | 35 (0.00)  | 58 (0.33)  | 0.87 |
| 11-03 | Gp4 | g.chr5:37201801C>T   | Silent            | C5orf42   | p.L1133L | chromosome 5 open rea    | 24 (0.04)  | 37 (0.16)  | 0.43 |

|       |     |                     |                   |          |          |                         |            |            |      |
|-------|-----|---------------------|-------------------|----------|----------|-------------------------|------------|------------|------|
| 11-03 | Gp4 | g.chr5:41912268C>G  | Missense Mutation | C5orf51  | p.A195G  | chromosome 5 open rea   | 22 (0.00)  | 21 (0.24)  | 0.63 |
| 11-03 | Gp4 | g.chr5:131796276C>T | Silent            | C5orf56  | p.L37L   | chromosome 5 open rea   | 32 (0.00)  | 13 (0.46)  | 1.23 |
| 11-03 | Gp4 | g.chr6:36867264C>G  | Nonsense Mutation | C6orf89  | p.S22*   | chromosome 6 open rea   | 34 (0.00)  | 19 (0.26)  | 0.70 |
| 11-03 | Gp4 | g.chr7:134853611C>T | Missense Mutation | C7orf49  | p.A22T   | chromosome 7 open rea   | 59 (0.00)  | 44 (0.25)  | 0.67 |
| 11-03 | Gp4 | g.chr7:134853614C>T | Missense Mutation | C7orf49  | p.V21M   | chromosome 7 open rea   | 58 (0.00)  | 45 (0.24)  | 0.65 |
| 11-03 | Gp4 | g.chr7:134853617G>A | Nonsense Mutation | C7orf49  | p.Q20*   | chromosome 7 open rea   | 58 (0.00)  | 45 (0.18)  | 0.47 |
| 11-03 | Gp4 | g.chr8:69552743C>T  | Missense Mutation | C8orf34  | p.A413V  | chromosome 8 open rea   | 17 (0.00)  | 26 (0.27)  | 0.72 |
| 11-03 | Gp4 | g.chr9:116186533G>A | Silent            | C9orf43  | p.K248K  | chromosome 9 open rea   | 68 (0.00)  | 17 (0.41)  | 1.10 |
| 11-03 | Gp4 | g.chr9:114510448G>A | Silent            | C9orf84  | p.I195I  | chromosome 9 open rea   | 36 (0.00)  | 19 (0.26)  | 0.70 |
| 11-03 | Gp4 | g.chr16:87921762C>A | Missense Mutation | CA5A     | p.Q297H  | carbonic anhydrase VA,  | 100 (0.00) | 56 (0.21)  | 0.57 |
| 11-03 | Gp4 | g.chr12:2714934C>T  | Silent            | CACNA1C  | p.I1066I | calcium channel, voltag | 19 (0.00)  | 25 (0.24)  | 0.80 |
| 11-03 | Gp4 | g.chr1:181724502G>A | Missense Mutation | CACNA1E  | p.D1320N | calcium channel, voltag | 113 (0.00) | 150 (0.17) | 0.44 |
| 11-03 | Gp4 | g.chr1:181725190T>A | Missense Mutation | CACNA1E  | p.L1363Q | calcium channel, voltag | 33 (0.00)  | 13 (0.38)  | 1.03 |
| 11-03 | Gp4 | g.chr17:48683306C>T | Silent            | CACNA1G  | p.N1448N | calcium channel, voltag | 25 (0.00)  | 66 (0.24)  | 0.65 |
| 11-03 | Gp4 | g.chr3:55107474C>T  | Missense Mutation | CACNA2D3 | p.S997F  | calcium channel, voltag | 41 (0.00)  | 18 (0.33)  | 0.89 |
| 11-03 | Gp4 | g.chr2:152737433T>C | Missense Mutation | CACNB4   | p.K44E   | calcium channel, voltag | 51 (0.00)  | 40 (0.17)  | 0.47 |
| 11-03 | Gp4 | g.chr3:85017094G>A  | Intron            | CADM2    |          | cell adhesion molecule  | 217 (0.00) | 13 (0.46)  | 1.23 |
| 11-03 | Gp4 | g.chr3:85058257C>A  | Intron            | CADM2    |          | cell adhesion molecule  | 249 (0.00) | 36 (0.31)  | 0.81 |
| 11-03 | Gp4 | g.chr3:85097916G>A  | Intron            | CADM2    |          | cell adhesion molecule  | 228 (0.00) | 27 (0.37)  | 0.99 |
| 11-03 | Gp4 | g.chr3:85136140A>G  | Intron            | CADM2    |          | cell adhesion molecule  | 220 (0.00) | 32 (0.16)  | 0.42 |
| 11-03 | Gp4 | g.chr3:85155432G>A  | Intron            | CADM2    |          | cell adhesion molecule  | 244 (0.00) | 62 (0.32)  | 0.86 |
| 11-03 | Gp4 | g.chr3:85170589A>T  | Intron            | CADM2    |          | cell adhesion molecule  | 230 (0.00) | 67 (0.24)  | 0.64 |
| 11-03 | Gp4 | g.chr3:85189251C>A  | Intron            | CADM2    |          | cell adhesion molecule  | 228 (0.00) | 34 (0.21)  | 0.55 |
| 11-03 | Gp4 | g.chr3:85225296C>T  | Intron            | CADM2    |          | cell adhesion molecule  | 249 (0.00) | 33 (0.27)  | 0.73 |
| 11-03 | Gp4 | g.chr3:85239391C>T  | Intron            | CADM2    |          | cell adhesion molecule  | 217 (0.00) | 36 (0.22)  | 0.59 |
| 11-03 | Gp4 | g.chr3:85277653G>A  | Intron            | CADM2    |          | cell adhesion molecule  | 235 (0.00) | 28 (0.29)  | 0.76 |
| 11-03 | Gp4 | g.chr3:85326465C>A  | Intron            | CADM2    |          | cell adhesion molecule  | 226 (0.00) | 22 (0.82)  | 2.18 |
| 11-03 | Gp4 | g.chr3:85352660C>G  | Intron            | CADM2    |          | cell adhesion molecule  | 221 (0.00) | 14 (0.43)  | 1.14 |
| 11-03 | Gp4 | g.chr3:85426504G>T  | Intron            | CADM2    |          | cell adhesion molecule  | 254 (0.00) | 70 (0.16)  | 0.42 |
| 11-03 | Gp4 | g.chr3:85458797G>A  | Intron            | CADM2    |          | cell adhesion molecule  | 239 (0.00) | 48 (0.38)  | 1.00 |
| 11-03 | Gp4 | g.chr3:85469086G>C  | Intron            | CADM2    |          | cell adhesion molecule  | 256 (0.00) | 40 (0.25)  | 0.67 |
| 11-03 | Gp4 | g.chr3:85511302G>A  | Intron            | CADM2    |          | cell adhesion molecule  | 247 (0.00) | 35 (0.26)  | 0.69 |
| 11-03 | Gp4 | g.chr3:85557931G>C  | Intron            | CADM2    |          | cell adhesion molecule  | 227 (0.00) | 24 (0.21)  | 0.56 |
| 11-03 | Gp4 | g.chr3:85616286G>A  | Intron            | CADM2    |          | cell adhesion molecule  | 251 (0.00) | 78 (0.19)  | 0.51 |
| 11-03 | Gp4 | g.chr3:85631860C>T  | Intron            | CADM2    |          | cell adhesion molecule  | 239 (0.00) | 33 (0.15)  | 0.40 |

|       |     |                      |                   |          |          |                                     |           |      |
|-------|-----|----------------------|-------------------|----------|----------|-------------------------------------|-----------|------|
| 11-03 | Gp4 | g.chr3:85658596A>T   | Intron            | CADM2    |          | cell adhesion molecule 238 (0.00)   | 22 (0.23) | 0.61 |
| 11-03 | Gp4 | g.chr3:85709925G>T   | Intron            | CADM2    |          | cell adhesion molecule 257 (0.00)   | 17 (0.29) | 0.78 |
| 11-03 | Gp4 | g.chr3:85712937C>T   | Intron            | CADM2    |          | cell adhesion molecule 257 (0.00)   | 34 (0.15) | 0.39 |
| 11-03 | Gp4 | g.chr3:85724868G>A   | Intron            | CADM2    |          | cell adhesion molecule 251 (0.02)   | 66 (0.24) | 0.65 |
| 11-03 | Gp4 | g.chr3:85759384C>A   | Intron            | CADM2    |          | cell adhesion molecule 254 (0.00)   | 75 (0.29) | 0.78 |
| 11-03 | Gp4 | g.chr3:85808942G>C   | Intron            | CADM2    |          | cell adhesion molecule 249 (0.00)   | 43 (0.16) | 0.43 |
| 11-03 | Gp4 | g.chr3:85822396G>T   | Intron            | CADM2    |          | cell adhesion molecule 234 (0.00)   | 34 (0.29) | 0.78 |
| 11-03 | Gp4 | g.chr3:85949199C>A   | Intron            | CADM2    |          | cell adhesion molecule 222 (0.00)   | 15 (0.33) | 0.89 |
| 11-03 | Gp4 | g.chr3:86042639C>A   | Intron            | CADM2    |          | cell adhesion molecule 215 (0.00)   | 11 (0.73) | 1.94 |
| 11-03 | Gp4 | g.chr3:86063885C>A   | Intron            | CADM2    |          | cell adhesion molecule 257 (0.00)   | 44 (0.20) | 0.55 |
| 11-03 | Gp4 | g.chr3:86088161C>G   | Intron            | CADM2    |          | cell adhesion molecule 260 (0.00)   | 35 (0.17) | 0.46 |
| 11-03 | Gp4 | g.chr3:86095933C>G   | Intron            | CADM2    |          | cell adhesion molecule 238 (0.00)   | 19 (0.37) | 0.98 |
| 11-03 | Gp4 | g.chr3:86099192C>T   | Intron            | CADM2    |          | cell adhesion molecule 221 (0.00)   | 28 (0.21) | 0.57 |
| 11-03 | Gp4 | g.chr10:75608858G>T  | Missense Mutation | CAMK2G   | p.L144M  | calcium/calmodulin-dep23 (0.00)     | 41 (0.15) | 0.39 |
| 11-03 | Gp4 | g.chr1:7805904G>A    | Splice Site       | CAMTA1   |          | calmodulin binding tran 47 (0.00)   | 30 (0.17) | 0.44 |
| 11-03 | Gp4 | g.chr15:42652165C>A  | Silent            | CAPN3    | p.I54I   | calpain 3, (p94) 58 (0.00)          | 29 (0.28) | 0.74 |
| 11-03 | Gp4 | g.chr3:15283043C>T   | Missense Mutation | CAPN7    | p.P579L  | calpain 7 18 (0.00)                 | 32 (0.41) | 1.08 |
| 11-03 | Gp4 | g.chr11:34119301C>G  | Silent            | CAPRIN1  | p.A686A  | cell cycle associated pro29 (0.00)  | 29 (0.31) | 0.83 |
| 11-03 | Gp4 | g.chr12:30906614G>T  | Silent            | CAPRIN2  | p.S28S   | caprin family member 235 (0.00)     | 37 (0.16) | 0.54 |
| 11-03 | Gp4 | g.chr12:18891296G>A  | Missense Mutation | CAPZA3   | p.D32N   | capping protein (actin fi 30 (0.00) | 41 (0.17) | 0.57 |
| 11-03 | Gp4 | g.chr11:104915259C>T | Missense Mutation | CARD16   | p.R45H   | caspase recruitment don 31 (0.00)   | 48 (0.33) | 0.89 |
| 11-03 | Gp4 | g.chr2:203836374C>A  | Nonsense Mutation | CARF     | p.S415*  | calcium responsive tran:29 (0.00)   | 54 (0.17) | 0.44 |
| 11-03 | Gp4 | g.chr15:40916357A>G  | Missense Mutation | CASC5    | p.S1325G | cancer susceptibility car 36 (0.00) | 34 (0.32) | 0.86 |
| 11-03 | Gp4 | g.chr11:104815490G>A | Missense Mutation | CASP4    | p.P319L  | caspase 4, apoptosis-rel:23 (0.00)  | 20 (0.30) | 0.80 |
| 11-03 | Gp4 | g.chr6:90577199C>T   | RNA               | CASP8AP2 |          | caspase 8 associated pro 70 (0.00)  | 40 (0.38) | 0.43 |
| 11-03 | Gp4 | g.chr1:10710764G>A   | Silent            | CASZ1    | p.S955S  | castor zinc finger 1 57 (0.00)      | 33 (0.24) | 0.65 |
| 11-03 | Gp4 | g.chr11:119146746G>T | Missense Mutation | CBL      | p.W303C  | Cbl proto-oncogene, E3 17 (0.00)    | 26 (0.19) | 0.51 |
| 11-03 | Gp4 | g.chr21:37444536G>A  | Silent            | CBR1     | p.L154L  | carbonyl reductase 1 54 (0.00)      | 36 (0.17) | 0.44 |
| 11-03 | Gp4 | g.chr19:48815311G>T  | Silent            | CCDC114  | p.I104I  | coiled-coil domain cont:22 (0.00)   | 32 (0.34) | 0.92 |
| 11-03 | Gp4 | g.chr2:170502493C>A  | Missense Mutation | CCDC173  | p.G506V  | coiled-coil domain cont:33 (0.00)   | 55 (0.20) | 0.53 |
| 11-03 | Gp4 | g.chr3:14709645G>A   | Silent            | CCDC174  | p.K303K  | coiled-coil domain cont: 18 (0.00)  | 38 (0.16) | 0.42 |
| 11-03 | Gp4 | g.chr1:3686421C>T    | Silent            | CCDC27   | p.I606I  | coiled-coil domain cont:76 (0.00)   | 45 (0.20) | 0.53 |
| 11-03 | Gp4 | g.chr12:102437979G>T | Silent            | CCDC53   | p.I76I   | coiled-coil domain cont:56 (0.00)   | 49 (0.12) | 0.42 |
| 11-03 | Gp4 | g.chr4:7043833G>T    | Missense Mutation | CCDC96   | p.P278H  | coiled-coil domain cont: 18 (0.00)  | 27 (0.19) | 0.49 |
| 11-03 | Gp4 | g.chr4:26491060C>T   | Silent            | CCKAR    | p.L53L   | cholecystokinin A recep20 (0.00)    | 20 (0.30) | 0.80 |



|       |     |                      |                   |          |          |                           |           |           |      |
|-------|-----|----------------------|-------------------|----------|----------|---------------------------|-----------|-----------|------|
| 11-03 | Gp4 | g.chr19:30308050G>A  | Missense Mutation | CCNE1    | p.D63N   | cyclin E1                 | 31 (0.00) | 34 (0.15) | 0.39 |
| 11-03 | Gp4 | g.chr5:162868266C>A  | Silent            | CCNG1    | p.V15V   | cyclin G1                 | 28 (0.00) | 26 (0.23) | 0.62 |
| 11-03 | Gp4 | g.chr3:156866269G>A  | Missense Mutation | CCNL1    | p.L448F  | cyclin L1                 | 38 (0.00) | 29 (0.76) | 2.02 |
| 11-03 | Gp4 | g.chr12:49087773C>T  | Silent            | CCNT1    | p.E408E  | cyclin T1                 | 37 (0.00) | 16 (0.38) | 1.26 |
| 11-03 | Gp4 | g.chr7:64525509G>A   | RNA               | CCT6P3   |          | chaperonin containing T42 | 0.02      | 38 (0.16) | 0.42 |
| 11-03 | Gp4 | g.chr2:73466850G>A   | Missense Mutation | CCT7     | p.C29Y   | chaperonin containing T18 | 0.00      | 11 (0.82) | 2.18 |
| 11-03 | Gp4 | g.chr2:73470227C>T   | Silent            | CCT7     | p.I121I  | chaperonin containing T41 | 0.00      | 62 (0.21) | 0.56 |
| 11-03 | Gp4 | g.chr6:47563641C>T   | Missense Mutation | CD2AP    | p.P385S  | CD2-associated protein    | 87 (0.01) | 98 (0.14) | 0.38 |
| 11-03 | Gp4 | g.chr6:47573988C>A   | Missense Mutation | CD2AP    | p.P502Q  | CD2-associated protein    | 31 (0.00) | 28 (0.18) | 0.48 |
| 11-03 | Gp4 | g.chr1:160654748C>T  | Missense Mutation | CD48     | p.S105N  | CD48 molecule             | 27 (0.00) | 21 (0.24) | 0.63 |
| 11-03 | Gp4 | g.chr1:43828730C>G   | Missense Mutation | CDC20    | p.P477R  | cell division cycle 20    | 24 (0.00) | 27 (0.44) | 1.19 |
| 11-03 | Gp4 | g.chr22:19506387G>A  | Missense Mutation | CDC45    | p.D553N  | cell division cycle 45    | 35 (0.00) | 26 (0.19) | 0.51 |
| 11-03 | Gp4 | g.chr16:68721506C>T  | Silent            | CDH3     | p.T554T  | cadherin 3, type 1, P-cac | 65 (0.00) | 30 (0.17) | 0.44 |
| 11-03 | Gp4 | g.chr16:61854943C>T  | Missense Mutation | CDH8     | p.D304N  | cadherin 8, type 2        | 49 (0.00) | 31 (0.29) | 0.77 |
| 11-03 | Gp4 | g.chr5:26881634C>T   | Missense Mutation | CDH9     | p.D661N  | cadherin 9, type 2 (T1-c  | 35 (0.00) | 19 (0.26) | 0.70 |
| 11-03 | Gp4 | g.chr16:29872446G>T  | Missense Mutation | CDIPT    | p.H60N   | CDP-diacylglycerol--inc   | 38 (0.00) | 36 (0.17) | 0.44 |
| 11-03 | Gp4 | g.chr10:62544558C>A  | Missense Mutation | CDK1     | p.P45T   | cyclin-dependent kinase   | 30 (0.00) | 72 (0.24) | 0.63 |
| 11-03 | Gp4 | g.chr17:37627748C>T  | Missense Mutation | CDK12    | p.P555S  | cyclin-dependent kinase   | 38 (0.00) | 56 (0.23) | 0.62 |
| 11-03 | Gp4 | g.chr9:123205922C>A  | Missense Mutation | CDK5RAP2 | p.D1042Y | CDK5 regulatory subun     | 65 (0.00) | 41 (0.20) | 0.52 |
| 11-03 | Gp4 | g.chr7:92354981G>A   | Missense Mutation | CDK6     | p.L166F  | cyclin-dependent kinase   | 39 (0.00) | 12 (0.42) | 1.11 |
| 11-03 | Gp4 | g.chrX:18622375G>A   | Missense Mutation | CDKL5    | p.R444H  | cyclin-dependent kinase   | 29 (0.00) | 20 (0.75) | 1.25 |
| 11-03 | Gp4 | g.chr9:21970612G>T   | Intron            | CDKN2A   |          | cyclin-dependent kinase   | 18 (0.00) | 40 (0.17) | 0.47 |
| 11-03 | Gp4 | g.chr11:125880424G>A | Missense Mutation | CDON     | p.S455L  | cell adhesion associated  | 38 (0.00) | 60 (0.23) | 0.62 |
| 11-03 | Gp4 | g.chr19:42083583C>G  | Silent            | CEACAM21 | p.T32T   | carcinoembryonic antigen  | 92 (0.00) | 32 (0.28) | 0.75 |
| 11-03 | Gp4 | g.chr19:42187837G>A  | Silent            | CEACAM7  | p.S195S  | carcinoembryonic antigen  | 29 (0.00) | 18 (0.33) | 0.89 |
| 11-03 | Gp4 | g.chr19:42190917C>T  | Silent            | CEACAM7  | p.E100E  | carcinoembryonic antigen  | 25 (0.00) | 22 (0.82) | 2.18 |
| 11-03 | Gp4 | g.chr14:81251471G>A  | Missense Mutation | CEP128   | p.A660V  | centrosomal protein 128   | 29 (0.00) | 30 (0.27) | 0.71 |
| 11-03 | Gp4 | g.chr14:81380682G>T  | Missense Mutation | CEP128   | p.A73E   | centrosomal protein 128   | 31 (0.00) | 28 (0.21) | 0.57 |
| 11-03 | Gp4 | g.chr4:175237336G>A  | Silent            | CEP44    | p.E327E  | centrosomal protein 44k   | 19 (0.00) | 33 (0.18) | 0.48 |
| 11-03 | Gp4 | g.chr1:26581998C>T   | Missense Mutation | CEP85    | p.P182L  | centrosomal protein 85k   | 38 (0.00) | 18 (0.44) | 1.19 |
| 11-03 | Gp4 | g.chr3:101446287C>A  | Missense Mutation | CEP97    | p.R83S   | centrosomal protein 97k   | 38 (0.00) | 43 (0.19) | 0.50 |
| 11-03 | Gp4 | g.chr19:4408952C>T   | Silent            | CHAF1A   | p.D52D   | chromatin assembly fact   | 29 (0.00) | 30 (0.23) | 0.79 |
| 11-03 | Gp4 | g.chr5:98193903G>T   | Missense Mutation | CHD1     | p.H1590N | chromodomain helicase     | 33 (0.00) | 19 (0.42) | 1.12 |
| 11-03 | Gp4 | g.chr5:98205273C>T   | Intron            | CHD1     |          | chromodomain helicase     | 85 (0.01) | 28 (0.18) | 0.48 |
| 11-03 | Gp4 | g.chr1:146747772G>A  | Missense Mutation | CHD1L    | p.V464I  | chromodomain helicase     | 48 (0.00) | 27 (0.22) | 0.59 |

|       |     |                      |                   |        |          |                                      |           |      |
|-------|-----|----------------------|-------------------|--------|----------|--------------------------------------|-----------|------|
| 11-03 | Gp4 | g.chr12:6692027C>A   | Missense Mutation | CHD4   | p.G1433V | chromodomain helicase 98 (0.00)      | 40 (0.15) | 0.50 |
| 11-03 | Gp4 | g.chr1:6182255C>T    | Intron            | CHD5   |          | chromodomain helicase 22 (0.00)      | 12 (0.67) | 1.78 |
| 11-03 | Gp4 | g.chr1:6218004C>T    | Intron            | CHD5   |          | chromodomain helicase 31 (0.00)      | 28 (0.18) | 0.48 |
| 11-03 | Gp4 | g.chr8:61736476G>A   | Silent            | CHD7   | p.E1093E | chromodomain helicase 28 (0.00)      | 25 (0.64) | 1.71 |
| 11-03 | Gp4 | g.chr8:61749563G>A   | Missense Mutation | CHD7   | p.D1393N | chromodomain helicase 82 (0.00)      | 67 (0.27) | 0.72 |
| 11-03 | Gp4 | g.chr8:61765419G>A   | Silent            | CHD7   | p.P2045P | chromodomain helicase 73 (0.00)      | 20 (0.25) | 0.67 |
| 11-03 | Gp4 | g.chr16:53301261C>A  | Missense Mutation | CHD9   | p.A1459D | chromodomain helicase 96 (0.00)      | 53 (0.19) | 0.50 |
| 11-03 | Gp4 | g.chr16:53301279C>G  | Missense Mutation | CHD9   | p.A1465G | chromodomain helicase 53 (0.00)      | 36 (0.28) | 0.74 |
| 11-03 | Gp4 | g.chr16:53358100C>A  | Missense Mutation | CHD9   | p.L2647I | chromodomain helicase 26 (0.00)      | 35 (0.23) | 0.61 |
| 11-03 | Gp4 | g.chr12:133433199C>T | Missense Mutation | CHFR   | p.E282K  | checkpoint with forkhea20 (0.00)     | 28 (0.25) | 0.67 |
| 11-03 | Gp4 | g.chr1:241798796C>T  | Silent            | CHML   | p.K91K   | choroideremia-like (Rat 70 (0.01)    | 90 (0.21) | 0.56 |
| 11-03 | Gp4 | g.chr7:29519959C>T   | Missense Mutation | CHN2   | p.T214I  | chimerin 2 84 (0.00)                 | 26 (0.54) | 1.44 |
| 11-03 | Gp4 | g.chr7:150933562C>T  | Silent            | CHPF2  | p.F291F  | chondroitin polymerizin 16 (0.00)    | 13 (0.38) | 1.03 |
| 11-03 | Gp4 | g.chr15:78873281G>A  | Missense Mutation | CHRNA5 | p.A79T   | cholinergic receptor, nic 24 (0.00)  | 68 (0.16) | 0.43 |
| 11-03 | Gp4 | g.chr18:24496659C>T  | Missense Mutation | CHST9  | p.S299N  | carbohydrate (N-acetyl)g 33 (0.00)   | 42 (0.19) | 0.51 |
| 11-03 | Gp4 | g.chr15:101717888C>T | Missense Mutation | CHSY1  | p.R705Q  | chondroitin sulfate syntnl 21 (0.00) | 37 (0.43) | 1.15 |
| 11-03 | Gp4 | g.chr14:65390832G>A  | Missense Mutation | CHURC1 | p.V82I   | churchill domain contain 16 (0.00)   | 24 (0.42) | 1.11 |
| 11-03 | Gp4 | g.chr11:46766065C>A  | Missense Mutation | CKAP5  | p.G1923C | cytoskeleton associated 34 (0.03)    | 12 (0.50) | 1.33 |
| 11-03 | Gp4 | g.chr11:46839959T>C  | Silent            | CKAP5  | p.G51G   | cytoskeleton associated 82 (0.00)    | 40 (0.42) | 1.13 |
| 11-03 | Gp4 | g.chr2:122154727C>T  | Missense Mutation | CLASP1 | p.D1010N | cytoplasmic linker assoc 56 (0.02)   | 33 (0.15) | 0.40 |
| 11-03 | Gp4 | g.chr2:122285415G>A  | Nonsense Mutation | CLASP1 | p.R144*  | cytoplasmic linker assoc 58 (0.00)   | 31 (0.19) | 0.52 |
| 11-03 | Gp4 | g.chr3:33602316C>T   | Missense Mutation | CLASP2 | p.A980T  | cytoplasmic linker assoc 51 (0.00)   | 54 (0.15) | 0.40 |
| 11-03 | Gp4 | g.chr7:143028688G>A  | Missense Mutation | CLCN1  | p.R370H  | chloride channel, voltag 25 (0.00)   | 26 (0.19) | 0.51 |
| 11-03 | Gp4 | g.chr5:157218967C>T  | Nonsense Mutation | CLINT1 | p.W375*  | clathrin interactor 1 23 (0.00)      | 50 (0.26) | 0.69 |
| 11-03 | Gp4 | g.chr3:140140017G>A  | Missense Mutation | CLSTN2 | p.E230K  | calsyntenin 2 46 (0.00)              | 32 (0.38) | 1.00 |
| 11-03 | Gp4 | g.chr3:140282839C>G  | Missense Mutation | CLSTN2 | p.S840C  | calsyntenin 2 71 (0.01)              | 59 (0.27) | 0.72 |
| 11-03 | Gp4 | g.chr3:140282988G>A  | Splice Site       | CLSTN2 |          | calsyntenin 2 34 (0.00)              | 17 (0.35) | 0.94 |
| 11-03 | Gp4 | g.chr17:57738810C>T  | Missense Mutation | CLTC   | p.L392F  | clathrin, heavy chain (H 26 (0.00)   | 15 (0.67) | 1.78 |
| 11-03 | Gp4 | g.chr6:25113943C>T   | RNA               | CMAHP  |          | cytidine monophospho-l 15 (0.00)     | 27 (0.26) | 0.69 |
| 11-03 | Gp4 | g.chr6:37427455G>T   | Missense Mutation | CMTR1  | p.D364Y  | cap methyltransferase 1 66 (0.00)    | 66 (0.26) | 0.69 |
| 11-03 | Gp4 | g.chr5:79027127G>A   | Missense Mutation | CMYA5  | p.D847N  | cardiomyopathy associa 35 (0.00)     | 20 (0.40) | 1.07 |
| 11-03 | Gp4 | g.chr5:79030322G>A   | Missense Mutation | CMYA5  | p.G1912R | cardiomyopathy associa 74 (0.00)     | 18 (0.33) | 0.89 |
| 11-03 | Gp4 | g.chr5:79031254A>T   | Silent            | CMYA5  | p.T2222T | cardiomyopathy associa 24 (0.00)     | 55 (0.31) | 0.82 |
| 11-03 | Gp4 | g.chr2:99012525C>A   | Missense Mutation | CNGA3  | p.P302T  | cyclic nucleotide gated c 27 (0.00)  | 36 (0.19) | 0.52 |
| 11-03 | Gp4 | g.chr8:87588129C>T   | Missense Mutation | CNGB3  | p.G778E  | cyclic nucleotide gated c 48 (0.00)  | 17 (0.29) | 0.78 |

|       |     |                      |                   |         |          |                                        |           |      |
|-------|-----|----------------------|-------------------|---------|----------|----------------------------------------|-----------|------|
| 11-03 | Gp4 | g.chr10:101122114G>A | Silent            | CNNM1   | p.Q663Q  | cyclin and CBS domain 51 (0.00)        | 64 (0.16) | 0.42 |
| 11-03 | Gp4 | g.chr2:68544234C>T   | Missense Mutation | CNRIP1  | p.E129K  | cannabinoid receptor int 26 (0.00)     | 29 (0.17) | 0.46 |
| 11-03 | Gp4 | g.chr1:230807346T>C  | Missense Mutation | COG2    | p.C287R  | component of oligomeri 22 (0.00)       | 24 (0.67) | 1.78 |
| 11-03 | Gp4 | g.chr16:70531854C>A  | Nonsense Mutation | COG4    | p.E434*  | component of oligomeri 32 (0.00)       | 69 (0.16) | 0.43 |
| 11-03 | Gp4 | g.chr7:106898775C>A  | Missense Mutation | COG5    | p.Q574H  | component of oligomeri 43 (0.00)       | 20 (0.35) | 0.93 |
| 11-03 | Gp4 | g.chr8:121174731C>T  | Missense Mutation | COL14A1 | p.P91L   | collagen, type XIV, alpha 17 (0.00)    | 38 (0.29) | 0.77 |
| 11-03 | Gp4 | g.chr8:121267535G>T  | Missense Mutation | COL14A1 | p.A937S  | collagen, type XIV, alpha 36 (0.00)    | 52 (0.19) | 0.51 |
| 11-03 | Gp4 | g.chr9:101797384C>T  | Missense Mutation | COL15A1 | p.P723L  | collagen, type XV, alpha 17 (0.00)     | 28 (0.18) | 0.48 |
| 11-03 | Gp4 | g.chr9:137619127C>T  | Silent            | COL5A1  | p.L224L  | collagen, type V, alpha 34 (0.00)      | 20 (0.30) | 0.80 |
| 11-03 | Gp4 | g.chr3:130159437C>T  | Silent            | COL6A5  | p.V2085V | collagen, type VI, alpha 60 (0.00)     | 46 (0.15) | 0.41 |
| 11-03 | Gp4 | g.chr3:130159444G>T  | Nonsense Mutation | COL6A5  | p.G2088* | collagen, type VI, alpha 40 (0.03)     | 34 (0.18) | 0.47 |
| 11-03 | Gp4 | g.chr1:36563397T>A   | Nonsense Mutation | COL8A2  | p.K629*  | collagen, type VIII, alpha 17 (0.00)   | 54 (0.19) | 0.49 |
| 11-03 | Gp4 | g.chr3:128976598G>A  | Missense Mutation | COPG1   | p.E256K  | coatomer protein complex 107 (0.00)    | 35 (0.14) | 0.38 |
| 11-03 | Gp4 | g.chr7:130295849G>A  | Missense Mutation | COPG2   | p.R238C  | coatomer protein complex 40 (0.00)     | 30 (0.23) | 0.62 |
| 11-03 | Gp4 | g.chr4:84194704G>T   | Missense Mutation | COQ2    | p.L213I  | coenzyme Q2 4-hydroxy 46 (0.02)        | 32 (0.31) | 0.83 |
| 11-03 | Gp4 | g.chr7:129944393G>T  | Nonsense Mutation | CPA4    | p.E154*  | carboxypeptidase A4 30 (0.00)          | 16 (0.31) | 0.83 |
| 11-03 | Gp4 | g.chr7:129989839C>G  | Silent            | CPA5    | p.A74A   | carboxypeptidase A5 37 (0.00)          | 40 (0.20) | 0.53 |
| 11-03 | Gp4 | g.chr4:166405585G>A  | Missense Mutation | CPE     | p.E268K  | carboxypeptidase E 64 (0.00)           | 52 (0.15) | 0.41 |
| 11-03 | Gp4 | g.chr4:15063796G>A   | Missense Mutation | CPEB2   | p.G493E  | cytoplasmic polyadenylation 44 (0.00)  | 48 (0.31) | 0.83 |
| 11-03 | Gp4 | g.chr4:15063847G>A   | Missense Mutation | CPEB2   | p.R510Q  | cytoplasmic polyadenylation 47 (0.02)  | 42 (0.31) | 0.83 |
| 11-03 | Gp4 | g.chr10:101814146C>T | Missense Mutation | CPN1    | p.A357T  | carboxypeptidase N, pol 42 (0.00)      | 63 (0.16) | 0.42 |
| 11-03 | Gp4 | g.chr2:207825616G>C  | Missense Mutation | CPO     | p.G175A  | carboxypeptidase O 69 (0.00)           | 28 (0.39) | 1.05 |
| 11-03 | Gp4 | g.chr1:207870972T>A  | Nonsense Mutation | CR1L    | p.Y329*  | complement component 109 (0.00)        | 73 (0.30) | 0.80 |
| 11-03 | Gp4 | g.chr12:94072758G>A  | Missense Mutation | CRADD   | p.D70N   | CASP2 and RIPK1 domain 44 (0.00)       | 43 (0.12) | 0.40 |
| 11-03 | Gp4 | g.chr9:35732839G>A   | Missense Mutation | CREB3   | p.G24R   | cAMP responsive element 34 (0.00)      | 28 (0.25) | 0.67 |
| 11-03 | Gp4 | g.chr1:153945685C>T  | Missense Mutation | CREB3L4 | p.S253F  | cAMP responsive element 18 (0.00)      | 30 (0.20) | 0.53 |
| 11-03 | Gp4 | g.chr7:28843861G>T   | Missense Mutation | CREB5   | p.G250W  | cAMP responsive element 15 (0.00)      | 13 (0.38) | 1.03 |
| 11-03 | Gp4 | g.chr16:3817902C>T   | Silent            | CREBBP  | p.E1023E | CREB binding protein 19 (0.00)         | 11 (0.45) | 1.21 |
| 11-03 | Gp4 | g.chr1:159683440G>A  | Silent            | CRP     | p.L184L  | C-reactive protein, pentamer 54 (0.00) | 62 (0.18) | 0.47 |
| 11-03 | Gp4 | g.chr3:97634475A>T   | Missense Mutation | CRYBG3  | p.E764D  | beta-gamma crystallin domain 45 (0.00) | 26 (0.19) | 0.51 |
| 11-03 | Gp4 | g.chr4:71115043C>A   | Missense Mutation | CSN3    | p.T139N  | casein kappa 50 (0.00)                 | 17 (0.41) | 1.10 |
| 11-03 | Gp4 | g.chr11:11374168C>T  | Missense Mutation | CSNK2A3 | p.E167K  | casein kinase 2, alpha 3 39 (0.03)     | 18 (0.56) | 1.48 |
| 11-03 | Gp4 | g.chr12:51457931G>T  | Silent            | CSRNP2  | p.S410S  | cysteine-serine-rich nuclear 34 (0.00) | 21 (0.33) | 1.12 |
| 11-03 | Gp4 | g.chrX:134948111G>T  | Missense Mutation | CT45A5  | p.Q72K   | cancer/testis antigen family 73 (0.00) | 53 (0.38) | 0.63 |
| 11-03 | Gp4 | g.chr20:56099217C>G  | Missense Mutation | CTCF    | p.K15N   | CCCTC-binding factor (27 (0.00)        | 61 (0.41) | 1.09 |

|       |     |                      |                   |               |          |                            |               |            |      |
|-------|-----|----------------------|-------------------|---------------|----------|----------------------------|---------------|------------|------|
| 11-03 | Gp4 | g.chr17:18418988C>T  | RNA               | CTD-2303H24.2 |          |                            | 45 (0.00)     | 21 (0.29)  | 0.76 |
| 11-03 | Gp4 | g.chr8:17947079G>A   | RNA               | CTD-2547L16.1 |          |                            | 39 (0.00)     | 16 (0.94)  | 0.93 |
| 11-03 | Gp4 | g.chr8:64321792A>T   | lincRNA           | CTD-3046C4.1  |          |                            | 38 (0.00)     | 56 (0.14)  | 0.38 |
| 11-03 | Gp4 | g.chr3:41275112C>A   | Missense Mutation | CTNNB1        | p.N426K  | catenin (cadherin-associ   | 76 (0.00)     | 42 (0.26)  | 0.70 |
| 11-03 | Gp4 | g.chr7:117431983G>A  | Missense Mutation | CTTNBP2       | p.P423S  | cortactin binding protei   | 67 (0.00)     | 30 (0.17)  | 0.44 |
| 11-03 | Gp4 | g.chr10:17087063C>T  | Silent            | CUBN          | p.L1205L | cubilin (intrinsic factor- | 42 (0.00)     | 21 (0.33)  | 0.89 |
| 11-03 | Gp4 | g.chr17:36958406C>T  | Missense Mutation | CWC25         | p.R406Q  | CWC25 spliceosome-as       | 40 (0.00)     | 33 (0.52)  | 1.37 |
| 11-03 | Gp4 | g.chr17:36966768G>C  | Missense Mutation | CWC25         | p.S193R  | CWC25 spliceosome-as       | 17 (0.00)     | 28 (0.21)  | 0.57 |
| 11-03 | Gp4 | g.chr5:64314095A>G   | Missense Mutation | CWC27         | p.R456G  | CWC27 spliceosome-as       | 22 (0.00)     | 28 (0.18)  | 0.48 |
| 11-03 | Gp4 | g.chr4:49034626C>T   | Missense Mutation | CWH43         | p.H491Y  | cell wall biogenesis       | 43 (38 (0.00) | 48 (0.17)  | 0.44 |
| 11-03 | Gp4 | g.chrX:149100843C>T  | Silent            | CXorf40B      | p.E132E  | chromosome X open rea      | 42 (0.00)     | 42 (0.26)  | 0.44 |
| 11-03 | Gp4 | g.chr10:104591337C>T | Missense Mutation | CYP17A1       | p.E391K  | cytochrome P450, famil     | 22 (0.00)     | 29 (0.31)  | 0.83 |
| 11-03 | Gp4 | g.chr1:47279596C>T   | Silent            | CYP4B1        | p.Y197Y  | cytochrome P450, famil     | 55 (0.00)     | 24 (0.21)  | 0.56 |
| 11-03 | Gp4 | g.chr4:187130045G>T  | Nonsense Mutation | CYP4V2        | p.E373*  | cytochrome P450, famil     | 17 (0.00)     | 16 (0.31)  | 0.83 |
| 11-03 | Gp4 | g.chr5:39377382C>A   | Missense Mutation | DAB2          | p.G503C  | Dab, mitogen-responsiv     | 41 (0.00)     | 47 (0.19)  | 0.51 |
| 11-03 | Gp4 | g.chr9:124377467T>C  | Intron            | DAB2IP        |          | DAB2 interacting protei    | 47 (0.00)     | 49 (0.16)  | 0.44 |
| 11-03 | Gp4 | g.chr9:124413276C>T  | Intron            | DAB2IP        |          | DAB2 interacting protei    | 51 (0.00)     | 36 (0.17)  | 0.44 |
| 11-03 | Gp4 | g.chr9:124413310G>A  | Intron            | DAB2IP        |          | DAB2 interacting protei    | 15 (0.00)     | 25 (0.32)  | 0.85 |
| 11-03 | Gp4 | g.chr9:124472322G>T  | Intron            | DAB2IP        |          | DAB2 interacting protei    | 47 (0.00)     | 31 (0.19)  | 0.52 |
| 11-03 | Gp4 | g.chr9:124475180G>A  | Intron            | DAB2IP        |          | DAB2 interacting protei    | 58 (0.00)     | 43 (0.40)  | 1.05 |
| 11-03 | Gp4 | g.chr9:124496179G>C  | Intron            | DAB2IP        |          | DAB2 interacting protei    | 31 (0.00)     | 27 (0.22)  | 0.59 |
| 11-03 | Gp4 | g.chr9:124505742G>A  | Intron            | DAB2IP        |          | DAB2 interacting protei    | 49 (0.00)     | 32 (0.25)  | 0.67 |
| 11-03 | Gp4 | g.chr9:124533308G>A  | Intron            | DAB2IP        |          | DAB2 interacting protei    | 24 (0.00)     | 30 (0.17)  | 0.44 |
| 11-03 | Gp4 | g.chr9:124533343C>A  | Intron            | DAB2IP        |          | DAB2 interacting protei    | 18 (0.00)     | 27 (0.19)  | 0.49 |
| 11-03 | Gp4 | g.chr9:124539518C>A  | Intron            | DAB2IP        |          | DAB2 interacting protei    | 26 (0.00)     | 21 (0.29)  | 0.76 |
| 11-03 | Gp4 | g.chr1:155697520C>G  | Missense Mutation | DAP3          | p.F198L  | death associated protein   | 29 (0.00)     | 13 (0.38)  | 1.03 |
| 11-03 | Gp4 | g.chr9:90262222C>A   | Silent            | DAPK1         | p.G411G  | death-associated protein   | 16 (0.00)     | 19 (0.26)  | 0.70 |
| 11-03 | Gp4 | g.chr18:51025793C>T  | Missense Mutation | DCC           | p.L975F  | DCC netrin 1 receptor      | 38 (0.00)     | 39 (0.26)  | 0.68 |
| 11-03 | Gp4 | g.chr11:108562685G>T | Missense Mutation | DDX10         | p.R353I  | DEAD (Asp-Glu-Ala-A        | 16 (0.00)     | 29 (0.24)  | 0.64 |
| 11-03 | Gp4 | g.chr22:38890892C>T  | Splice Site       | DDX17         | p.R347K  | DEAD (Asp-Glu-Ala-A        | 83 (0.00)     | 115 (0.23) | 0.60 |
| 11-03 | Gp4 | g.chrY:15027099G>C   | Missense Mutation | DDX3Y         | p.D327H  | DEAD (Asp-Glu-Ala-A        | 20 (0.00)     | 18 (0.50)  | 0.83 |
| 11-03 | Gp4 | g.chr5:176943151C>A  | Missense Mutation | DDX41         | p.E114D  | DEAD (Asp-Glu-Ala-A        | 18 (0.00)     | 31 (0.16)  | 0.43 |
| 11-03 | Gp4 | g.chr20:76927G>A     | Missense Mutation | DEFB125       | p.E114K  | defensin, beta 125         | 40 (0.00)     | 24 (0.29)  | 0.78 |
| 11-03 | Gp4 | g.chr8:142178119G>A  | Silent            | DENND3        | p.P590P  | DENN/MADD domain           | 37 (0.00)     | 26 (0.27)  | 0.72 |
| 11-03 | Gp4 | g.chr15:65964221G>A  | Missense Mutation | DENND4A       | p.S1414F | DENN/MADD domain           | 56 (0.00)     | 46 (0.15)  | 0.41 |

|       |     |                      |                   |         |          |                                     |           |      |
|-------|-----|----------------------|-------------------|---------|----------|-------------------------------------|-----------|------|
| 11-03 | Gp4 | g.chr12:31604929G>T  | Missense Mutation | DENND5B | p.A525D  | DENN/MADD domain 42 (0.00)          | 24 (0.25) | 0.84 |
| 11-03 | Gp4 | g.chr22:20077206C>T  | Missense Mutation | DGCR8   | p.P299S  | DGCR8 microprocessor 18 (0.00)      | 37 (0.32) | 0.86 |
| 11-03 | Gp4 | g.chr7:137341212C>A  | Splice Site       | DGKI    | p.K227N  | diacylglycerol kinase, ic 31 (0.00) | 12 (0.50) | 1.33 |
| 11-03 | Gp4 | g.chr4:24531368T>A   | Missense Mutation | DHX15   | p.H709L  | DEAH (Asp-Glu-Ala-H 50 (0.00)       | 61 (0.15) | 0.39 |
| 11-03 | Gp4 | g.chr5:54586077C>T   | Silent            | DHX29   | p.E292E  | DEAH (Asp-Glu-Ala-H 35 (0.00)       | 33 (0.15) | 0.40 |
| 11-03 | Gp4 | g.chr10:127548425C>T | Missense Mutation | DHX32   | p.G199E  | DEAH (Asp-Glu-Ala-H 40 (0.00)       | 30 (0.17) | 0.44 |
| 11-03 | Gp4 | g.chr17:57647972C>T  | Missense Mutation | DHX40   | p.T125I  | DEAH (Asp-Glu-Ala-H 24 (0.00)       | 45 (0.36) | 0.95 |
| 11-03 | Gp4 | g.chr2:39046214G>A   | Silent            | DHX57   | p.L1122L | DEAH (Asp-Glu-Ala-A 29 (0.00)       | 34 (0.15) | 0.39 |
| 11-03 | Gp4 | g.chr1:182853865C>T  | Silent            | DHX9    | p.P1126P | DEAH (Asp-Glu-Ala-H 52 (0.00)       | 17 (0.41) | 1.10 |
| 11-03 | Gp4 | g.chr14:95570026G>A  | Missense Mutation | DICER1  | p.T1236I | dicer 1, ribonuclease tyf 32 (0.00) | 34 (0.18) | 0.47 |
| 11-03 | Gp4 | g.chr7:96639245C>T   | Silent            | DLX6    | p.D256D  | distal-less homeobox 6 48 (0.00)    | 22 (0.23) | 0.61 |
| 11-03 | Gp4 | g.chr10:124339145G>A | Missense Mutation | DMBT1   | p.R244Q  | deleted in malignant bra 216 (0.00) | 54 (0.17) | 0.44 |
| 11-03 | Gp4 | g.chr10:124358478G>A | Missense Mutation | DMBT1   | p.G1049S | deleted in malignant bra 47 (0.00)  | 34 (0.35) | 0.94 |
| 11-03 | Gp4 | g.chr3:52389007C>A   | Nonsense Mutation | DNAH1   | p.S1210* | dynein, axonemal, heav 47 (0.00)    | 44 (0.18) | 0.48 |
| 11-03 | Gp4 | g.chr3:52417499G>A   | Missense Mutation | DNAH1   | p.S2680N | dynein, axonemal, heav 48 (0.00)    | 30 (0.43) | 1.16 |
| 11-03 | Gp4 | g.chr12:124409615C>T | Silent            | DNAH10  | p.L3811L | dynein, axonemal, heav 29 (0.00)    | 39 (0.13) | 0.45 |
| 11-03 | Gp4 | g.chr7:21628217C>T   | Nonsense Mutation | DNAH11  | p.Q646*  | dynein, axonemal, heav 36 (0.03)    | 26 (0.92) | 2.46 |
| 11-03 | Gp4 | g.chr1:225525133G>A  | Missense Mutation | DNAH14  | p.E2551K | dynein, axonemal, heav 41 (0.00)    | 62 (0.16) | 0.43 |
| 11-03 | Gp4 | g.chr17:11607575C>T  | Missense Mutation | DNAH9   | p.A1736V | dynein, axonemal, heav 46 (0.00)    | 17 (0.29) | 0.78 |
| 11-03 | Gp4 | g.chr17:11660950C>A  | Silent            | DNAH9   | p.A2312A | dynein, axonemal, heav 35 (0.00)    | 36 (0.17) | 0.44 |
| 11-03 | Gp4 | g.chr17:11865345G>A  | Silent            | DNAH9   | p.T4259T | dynein, axonemal, heav 17 (0.00)    | 13 (0.38) | 1.03 |
| 11-03 | Gp4 | g.chr1:15863266C>T   | Silent            | DNAJC16 | p.I177I  | DnaJ (Hsp40) homolog, 24 (0.00)     | 16 (0.38) | 1.00 |
| 11-03 | Gp4 | g.chr17:40148428C>A  | Missense Mutation | DNAJC7  | p.E102D  | DnaJ (Hsp40) homolog, 27 (0.00)     | 23 (0.74) | 1.97 |
| 11-03 | Gp4 | g.chr15:100332591C>T | RNA               | DNM1P46 |          | DNM1 pseudogene 46 43 (0.02)        | 14 (0.36) | 0.95 |
| 11-03 | Gp4 | g.chr10:101716021C>A | Missense Mutation | DNMBP   | p.D404Y  | dynamamin binding proteir 18 (0.00) | 30 (0.20) | 0.53 |
| 11-03 | Gp4 | g.chr19:10254555C>T  | Silent            | DNMT1   | p.L985L  | DNA (cytosine-5-)-metf 88 (0.00)    | 47 (0.15) | 0.40 |
| 11-03 | Gp4 | g.chr19:10274001C>A  | Splice Site       | DNMT1   |          | DNA (cytosine-5-)-metf 40 (0.00)    | 31 (0.26) | 0.69 |
| 11-03 | Gp4 | g.chr1:94343329C>T   | Silent            | DNTTIP2 | p.K54K   | deoxynucleotidyltransfe 24 (0.00)   | 45 (0.69) | 1.84 |
| 11-03 | Gp4 | g.chr10:129160404G>A | Silent            | DOCK1   | p.L1099L | dedicator of cytokinesis 62 (0.00)  | 62 (0.15) | 0.39 |
| 11-03 | Gp4 | g.chr10:129224163G>A | Missense Mutation | DOCK1   | p.R1580K | dedicator of cytokinesis 99 (0.01)  | 48 (0.17) | 0.44 |
| 11-03 | Gp4 | g.chrX:117815121T>C  | Silent            | DOCK11  | p.D1924D | dedicator of cytokinesis 32 (0.00)  | 23 (0.26) | 0.43 |
| 11-03 | Gp4 | g.chr3:51184027C>G   | Missense Mutation | DOCK3   | p.P265R  | dedicator of cytokinesis 48 (0.00)  | 61 (0.15) | 0.39 |
| 11-03 | Gp4 | g.chr9:372261C>A     | Missense Mutation | DOCK8   | p.P627H  | dedicator of cytokinesis 38 (0.00)  | 14 (0.50) | 1.33 |
| 11-03 | Gp4 | g.chr9:446457C>T     | Missense Mutation | DOCK8   | p.L1790F | dedicator of cytokinesis 48 (0.00)  | 34 (0.38) | 1.02 |
| 11-03 | Gp4 | g.chr18:67266663G>A  | Missense Mutation | DOK6    | p.R73Q   | docking protein 6 66 (0.00)         | 30 (0.27) | 0.71 |

|       |     |                      |                   |         |          |                           |            |            |      |
|-------|-----|----------------------|-------------------|---------|----------|---------------------------|------------|------------|------|
| 11-03 | Gp4 | g.chr18:67406338G>A  | Splice Site       | DOK6    | p.R246Q  | docking protein 6         | 66 (0.00)  | 45 (0.16)  | 0.41 |
| 11-03 | Gp4 | g.chr19:2185912G>A   | Missense Mutation | DOT1L   | p.D62N   | DOT1-like histone H3K 72  | 72 (0.00)  | 73 (0.32)  | 1.07 |
| 11-03 | Gp4 | g.chr11:66272202G>A  | Silent            | DPP3    | p.K666K  | dipeptidyl-peptidase 3    | 26 (0.00)  | 24 (0.21)  | 0.56 |
| 11-03 | Gp4 | g.chr7:154143321C>T  | Missense Mutation | DPP6    | p.P89L   | dipeptidyl-peptidase 6    | 61 (0.02)  | 38 (0.18)  | 0.49 |
| 11-03 | Gp4 | g.chr2:74749797G>A   | Missense Mutation | DQX1    | p.P469S  | DEAQ box RNA-depen        | 34 (0.00)  | 11 (0.45)  | 1.21 |
| 11-03 | Gp4 | g.chr5:31515145G>A   | Nonsense Mutation | DROSHA  | p.R414*  | drosha, ribonuclease typ  | 125 (0.00) | 30 (0.23)  | 0.62 |
| 11-03 | Gp4 | g.chr5:31515157G>A   | Missense Mutation | DROSHA  | p.P410S  | drosha, ribonuclease typ  | 125 (0.00) | 30 (0.17)  | 0.44 |
| 11-03 | Gp4 | g.chr6:56336905C>T   | Silent            | DST     | p.A7050A | dystonin                  | 84 (0.00)  | 38 (0.21)  | 0.56 |
| 11-03 | Gp4 | g.chr6:56380331T>C   | Missense Mutation | DST     | p.T5845A | dystonin                  | 72 (0.00)  | 41 (0.22)  | 0.59 |
| 11-03 | Gp4 | g.chr6:56392295G>T   | Missense Mutation | DST     | p.P5653Q | dystonin                  | 32 (0.00)  | 26 (0.42)  | 1.13 |
| 11-03 | Gp4 | g.chr6:56468769C>T   | Missense Mutation | DST     | p.E3342K | dystonin                  | 61 (0.00)  | 42 (0.19)  | 0.51 |
| 11-03 | Gp4 | g.chr6:56470017G>A   | Missense Mutation | DST     | p.L2926F | dystonin                  | 16 (0.00)  | 13 (0.38)  | 1.03 |
| 11-03 | Gp4 | g.chr2:25803649G>A   | Missense Mutation | DTNB    | p.P217L  | dystrobrevin, beta        | 20 (0.00)  | 14 (0.50)  | 1.33 |
| 11-03 | Gp4 | g.chr15:45408805C>T  | Silent            | DUOXA2  | p.N144N  | dual oxidase maturation   | 15 (0.00)  | 24 (0.50)  | 1.33 |
| 11-03 | Gp4 | g.chr12:89744428G>C  | Missense Mutation | DUSP6   | p.P259A  | dual specificity phospho  | 90 (0.00)  | 52 (0.15)  | 0.41 |
| 11-03 | Gp4 | g.chr14:102494288G>A | Nonsense Mutation | DYNC1H1 | p.W3093* | dynein, cytoplasmic 1, h  | 40 (0.00)  | 24 (0.21)  | 0.56 |
| 11-03 | Gp4 | g.chr2:172583340G>A  | Missense Mutation | DYNC1I2 | p.D278N  | dynein, cytoplasmic 1, i  | 24 (0.00)  | 47 (0.17)  | 0.45 |
| 11-03 | Gp4 | g.chr1:206821061C>T  | Missense Mutation | DYRK3   | p.P173L  | dual-specificity tyrosine | 21 (0.00)  | 49 (0.35)  | 0.93 |
| 11-03 | Gp4 | g.chr2:71753357G>A   | Missense Mutation | DYSF    | p.R386K  | dysferlin                 | 21 (0.00)  | 33 (0.18)  | 0.48 |
| 11-03 | Gp4 | g.chr6:20481630G>A   | Silent            | E2F3    | p.K233K  | E2F transcription factor  | 28 (0.00)  | 10 (0.50)  | 1.33 |
| 11-03 | Gp4 | g.chr11:19246387G>C  | Splice Site       | E2F8    | p.P808A  | E2F transcription factor  | 28 (0.00)  | 20 (0.30)  | 0.80 |
| 11-03 | Gp4 | g.chr17:28414184G>A  | Splice Site       | EFCAB5  | p.R1228K | EF-hand calcium bindin    | 99 (0.01)  | 61 (0.66)  | 1.75 |
| 11-03 | Gp4 | g.chr22:44131786T>C  | Missense Mutation | EFCAB6  | p.R199G  | EF-hand calcium bindin    | 42 (0.00)  | 34 (0.24)  | 0.63 |
| 11-03 | Gp4 | g.chr3:19925912C>A   | Missense Mutation | EFHB    | p.G580V  | EF-hand domain family.    | 21 (0.00)  | 32 (0.47)  | 1.25 |
| 11-03 | Gp4 | g.chr3:19926030C>G   | Missense Mutation | EFHB    | p.D541H  | EF-hand domain family.    | 18 (0.00)  | 21 (0.52)  | 1.40 |
| 11-03 | Gp4 | g.chr13:107148106T>A | Missense Mutation | EFNB2   | p.K163N  | ephrin-B2                 | 105 (0.00) | 49 (0.47)  | 1.25 |
| 11-03 | Gp4 | g.chr5:137803035G>A  | Silent            | EGR1    | p.S299S  | early growth response 1   | 41 (0.00)  | 51 (0.22)  | 0.58 |
| 11-03 | Gp4 | g.chr2:63085596C>T   | Silent            | EHBP1   | p.C230C  | EH domain binding prot    | 30 (0.00)  | 28 (0.29)  | 0.76 |
| 11-03 | Gp4 | g.chr3:184910690C>A  | Missense Mutation | EHHADH  | p.G403V  | enoyl-CoA, hydratase/3-   | 19 (0.00)  | 16 (0.44)  | 1.17 |
| 11-03 | Gp4 | g.chr14:75472575G>T  | Nonsense Mutation | EIF2B2  | p.E202*  | eukaryotic translation in | 27 (0.00)  | 24 (0.33)  | 0.89 |
| 11-03 | Gp4 | g.chr1:45446838C>T   | Start Codon SNP   | EIF2B3  | p.MII    | eukaryotic translation in | 48 (0.00)  | 106 (0.20) | 0.53 |
| 11-03 | Gp4 | g.chr12:10659474C>T  | Missense Mutation | EIF2S3L | p.H325Y  |                           | 43 (0.00)  | 36 (0.33)  | 1.12 |
| 11-03 | Gp4 | g.chr10:120795727C>T | Missense Mutation | EIF3A   | p.D1325N | eukaryotic translation in | 22 (0.00)  | 27 (0.26)  | 0.69 |
| 11-03 | Gp4 | g.chr7:2414233C>G    | Silent            | EIF3B   | p.G627G  | eukaryotic translation in | 22 (0.00)  | 26 (0.23)  | 0.62 |
| 11-03 | Gp4 | g.chr22:38274169C>T  | Silent            | EIF3L   | p.Y522Y  | eukaryotic translation in | 40 (0.00)  | 34 (0.18)  | 0.47 |

|       |     |                      |                   |           |          |                                      |           |      |
|-------|-----|----------------------|-------------------|-----------|----------|--------------------------------------|-----------|------|
| 11-03 | Gp4 | g.chr17:78109862C>T  | Missense Mutation | EIF4A3    | p.R387H  | eukaryotic translation in44 (0.02)   | 65 (0.23) | 0.62 |
| 11-03 | Gp4 | g.chr22:31844192G>A  | Missense Mutation | EIF4ENIF1 | p.L424F  | eukaryotic translation in44 (0.00)   | 51 (0.25) | 0.68 |
| 11-03 | Gp4 | g.chr1:21212703A>T   | Silent            | EIF4G3    | p.I755I  | eukaryotic translation in54 (0.00)   | 66 (0.17) | 0.44 |
| 11-03 | Gp4 | g.chr17:12908337G>A  | Nonsense Mutation | ELAC2     | p.Q318*  | elaC ribonuclease Z 2 110 (0.00)     | 73 (0.21) | 0.55 |
| 11-03 | Gp4 | g.chr13:41515280G>A  | Silent            | ELF1      | p.L345L  | E74-like factor 1 (ets do 76 (0.00)  | 66 (0.17) | 0.44 |
| 11-03 | Gp4 | g.chr13:41533006G>A  | Silent            | ELF1      | p.I73I   | E74-like factor 1 (ets do 30 (0.00)  | 32 (0.16) | 0.42 |
| 11-03 | Gp4 | g.chr5:60063672G>T   | Nonsense Mutation | ELOVL7    | p.S92*   | ELOVL fatty acid elong 27 (0.00)     | 43 (0.16) | 0.43 |
| 11-03 | Gp4 | g.chr18:2891553G>T   | Silent            | EMILIN2   | p.R476R  | elastin microfibril interf 45 (0.00) | 13 (0.62) | 1.64 |
| 11-03 | Gp4 | g.chr2:42488364C>T   | Nonsense Mutation | EML4      | p.Q148*  | echinoderm microtubule 64 (0.00)     | 35 (0.14) | 0.38 |
| 11-03 | Gp4 | g.chr14:89094003C>G  | Missense Mutation | EML5      | p.W1506C | echinoderm microtubule 56 (0.00)     | 48 (0.23) | 0.61 |
| 11-03 | Gp4 | g.chr19:48830116G>T  | Missense Mutation | EMP3      | p.L5F    | epithelial membrane pro 29 (0.00)    | 47 (0.21) | 0.57 |
| 11-03 | Gp4 | g.chr19:14876481G>A  | Missense Mutation | EMR2      | p.T257I  | egf-like module contain 25 (0.00)    | 11 (0.64) | 1.70 |
| 11-03 | Gp4 | g.chr3:40464871C>T   | Silent            | ENTPD3    | p.F398F  | ectonucleoside triphosph 32 (0.00)   | 13 (0.54) | 1.44 |
| 11-03 | Gp4 | g.chr20:34800223C>T  | Silent            | EPB41L1   | p.S703S  | erythrocyte membrane p 44 (0.02)     | 47 (0.19) | 0.51 |
| 11-03 | Gp4 | g.chr6:131277180G>C  | Nonsense Mutation | EPB41L2   | p.S149*  | erythrocyte membrane p 93 (0.00)     | 23 (0.65) | 0.69 |
| 11-03 | Gp4 | g.chr18:43535050C>T  | Silent            | EPG5      | p.G106G  | ectopic P-granules auto 24 (0.00)    | 11 (0.45) | 1.21 |
| 11-03 | Gp4 | g.chr4:66217208C>T   | Missense Mutation | EPHA5     | p.A803T  | EPH receptor A5 22 (0.05)            | 17 (0.47) | 1.25 |
| 11-03 | Gp4 | g.chr3:134873088C>A  | Silent            | EPHB1     | p.I464I  | EPH receptor B1 115 (0.00)           | 56 (0.16) | 0.43 |
| 11-03 | Gp4 | g.chr7:100404155C>A  | Missense Mutation | EPHB4     | p.A791S  | EPH receptor B4 26 (0.00)            | 10 (0.60) | 1.60 |
| 11-03 | Gp4 | g.chr7:142568064G>A  | Missense Mutation | EPHB6     | p.R902H  | EPH receptor B6 53 (0.00)            | 85 (0.22) | 0.60 |
| 11-03 | Gp4 | g.chr7:100320671G>A  | Missense Mutation | EPO       | p.R166H  | erythropoietin 45 (0.00)             | 25 (0.24) | 0.64 |
| 11-03 | Gp4 | g.chr2:26596441G>A   | Missense Mutation | EPT1      | p.E173K  | ethanolaminephosphotr 43 (0.00)      | 21 (0.24) | 0.63 |
| 11-03 | Gp4 | g.chr12:91366634A>T  | Missense Mutation | EPYC      | p.I155N  | epiphycan 33 (0.00)                  | 29 (0.21) | 0.70 |
| 11-03 | Gp4 | g.chr12:91366646C>T  | Missense Mutation | EPYC      | p.R151H  | epiphycan 33 (0.00)                  | 30 (0.30) | 1.02 |
| 11-03 | Gp4 | g.chr17:27186026C>T  | Silent            | ERAL1     | p.H335H  | Era-like 12S mitochond 22 (0.00)     | 24 (0.21) | 0.56 |
| 11-03 | Gp4 | g.chr12:56478919C>T  | Silent            | ERBB3     | p.T125T  | v-erb-b2 avian erythrobl 36 (0.00)   | 43 (0.12) | 0.39 |
| 11-03 | Gp4 | g.chr13:103514502C>T | Missense Mutation | ERCC5     | p.P335S  | excision repair cross-co 21 (0.00)   | 10 (0.50) | 1.33 |
| 11-03 | Gp4 | g.chr21:39787302G>A  | Intron            | ERG       |          | v-ets avian erythroblast 27 (0.00)   | 56 (0.18) | 0.48 |
| 11-03 | Gp4 | g.chr21:39791028G>A  | Intron            | ERG       |          | v-ets avian erythroblast 90 (0.00)   | 69 (0.16) | 0.43 |
| 11-03 | Gp4 | g.chr21:39806716A>T  | Intron            | ERG       |          | v-ets avian erythroblast 39 (0.03)   | 39 (0.31) | 0.82 |
| 11-03 | Gp4 | g.chr21:39806759G>C  | Intron            | ERG       |          | v-ets avian erythroblast 43 (0.00)   | 47 (0.17) | 0.45 |
| 11-03 | Gp4 | g.chr21:39823302C>T  | Intron            | ERG       |          | v-ets avian erythroblast 67 (0.00)   | 79 (0.22) | 0.57 |
| 11-03 | Gp4 | g.chr21:39838490G>T  | Intron            | ERG       |          | v-ets avian erythroblast 68 (0.00)   | 41 (0.22) | 0.59 |
| 11-03 | Gp4 | g.chr21:39891562G>A  | Intron            | ERG       |          | v-ets avian erythroblast 50 (0.00)   | 52 (0.23) | 0.62 |
| 11-03 | Gp4 | g.chr21:39913259G>A  | Intron            | ERG       |          | v-ets avian erythroblast 47 (0.00)   | 56 (0.14) | 0.38 |

|       |     |                      |                   |          |          |                           |            |            |      |
|-------|-----|----------------------|-------------------|----------|----------|---------------------------|------------|------------|------|
| 11-03 | Gp4 | g.chr21:39924649G>C  | Intron            | ERG      |          | v-ets avian erythroblastc | 20 (0.00)  | 27 (0.19)  | 0.49 |
| 11-03 | Gp4 | g.chr21:39932180C>T  | Intron            | ERG      |          | v-ets avian erythroblastc | 49 (0.00)  | 26 (0.27)  | 0.72 |
| 11-03 | Gp4 | g.chr21:39932187C>T  | Intron            | ERG      |          | v-ets avian erythroblastc | 49 (0.00)  | 27 (0.26)  | 0.69 |
| 11-03 | Gp4 | g.chr21:39956649G>C  | Intron            | ERG      |          | v-ets avian erythroblastc | 31 (0.00)  | 12 (0.42)  | 1.11 |
| 11-03 | Gp4 | g.chr21:40008495A>T  | Intron            | ERG      |          | v-ets avian erythroblastc | 69 (0.00)  | 29 (0.38)  | 1.01 |
| 11-03 | Gp4 | g.chr21:40011960C>T  | Intron            | ERG      |          | v-ets avian erythroblastc | 31 (0.00)  | 59 (0.29)  | 0.77 |
| 11-03 | Gp4 | g.chr21:40028074G>A  | Intron            | ERG      |          | v-ets avian erythroblastc | 34 (0.00)  | 37 (0.19)  | 0.50 |
| 11-03 | Gp4 | g.chr14:100604089G>T | Silent            | EVL      | p.V348V  | Enah/Vasp-like            | 26 (0.00)  | 27 (0.19)  | 0.49 |
| 11-03 | Gp4 | g.chr1:242016706G>A  | Missense Mutation | EXO1     | p.G110R  | exonuclease 1             | 21 (0.00)  | 32 (0.44)  | 1.17 |
| 11-03 | Gp4 | g.chr7:133002072G>T  | Missense Mutation | EXOC4    | p.D231Y  | exocyst complex compo     | 42 (0.00)  | 46 (0.15)  | 0.41 |
| 11-03 | Gp4 | g.chr17:74090575G>A  | Missense Mutation | EXOC7    | p.S243F  | exocyst complex compo     | 29 (0.00)  | 23 (0.39)  | 1.04 |
| 11-03 | Gp4 | g.chr1:11147565G>A   | Silent            | EXOSC10  | p.L343L  | exosome component 10      | 75 (0.00)  | 65 (0.28)  | 0.74 |
| 11-03 | Gp4 | g.chr1:11147594G>A   | Missense Mutation | EXOSC10  | p.R334W  | exosome component 10      | 67 (0.01)  | 62 (0.29)  | 0.77 |
| 11-03 | Gp4 | g.chr11:108381065C>T | Silent            | EXPH5    | p.Q1723Q | exophilin 5               | 26 (0.00)  | 33 (0.30)  | 0.81 |
| 11-03 | Gp4 | g.chr20:45811967G>T  | Missense Mutation | EYA2     | p.M488I  | EYA transcriptional coa   | 55 (0.00)  | 30 (0.33)  | 0.89 |
| 11-03 | Gp4 | g.chr6:64472377G>A   | Missense Mutation | EYS      | p.T2683I | eyes shut homolog (Dro    | 22 (0.00)  | 60 (0.20)  | 0.53 |
| 11-03 | Gp4 | g.chr17:40872352C>A  | Missense Mutation | EZH1     | p.K131N  | enhancer of zeste 1 poly  | 64 (0.02)  | 38 (0.18)  | 0.49 |
| 11-03 | Gp4 | g.chr1:207087420G>A  | Silent            | FAIM3    | p.I19I   | Fas apoptotic inhibitory  | 36 (0.00)  | 39 (0.18)  | 0.48 |
| 11-03 | Gp4 | g.chr1:184764594G>T  | Silent            | FAM129A  | p.V768V  | family with sequence si   | 69 (0.00)  | 47 (0.40)  | 1.08 |
| 11-03 | Gp4 | g.chr4:84390258C>T   | Missense Mutation | FAM175A  | p.E175K  | family with sequence si   | 31 (0.00)  | 79 (0.18)  | 0.47 |
| 11-03 | Gp4 | g.chr12:49994397A>G  | Silent            | FAM186B  | p.S342S  | family with sequence si   | 27 (0.00)  | 46 (0.13)  | 0.44 |
| 11-03 | Gp4 | g.chr12:49994697G>A  | Silent            | FAM186B  | p.N242N  | family with sequence si   | 24 (0.00)  | 34 (0.21)  | 0.69 |
| 11-03 | Gp4 | g.chr9:71998610G>T   | Missense Mutation | FAM189A2 | p.V187L  | family with sequence si   | 38 (0.03)  | 42 (0.14)  | 0.38 |
| 11-03 | Gp4 | g.chr9:34724476G>A   | Missense Mutation | FAM205A  | p.P921S  | family with sequence si   | 90 (0.00)  | 38 (0.26)  | 0.70 |
| 11-03 | Gp4 | g.chr9:34835339C>T   | RNA               | FAM205B  |          | family with sequence si   | 27 (0.00)  | 25 (0.20)  | 0.53 |
| 11-03 | Gp4 | g.chr15:52902202G>T  | Silent            | FAM214A  | p.G303G  | family with sequence si   | 25 (0.00)  | 50 (0.18)  | 0.48 |
| 11-03 | Gp4 | g.chr20:58519761G>A  | Missense Mutation | FAM217B  | p.E255K  | family with sequence si   | 75 (0.00)  | 37 (0.22)  | 0.58 |
| 11-03 | Gp4 | g.chr10:46281060G>A  | Nonsense Mutation | FAM21C   | p.W931*  | family with sequence si   | 69 (0.00)  | 41 (0.15)  | 0.39 |
| 11-03 | Gp4 | g.chr2:24406427C>T   | Missense Mutation | FAM228A  | p.P105L  | family with sequence si   | 20 (0.00)  | 56 (0.29)  | 0.76 |
| 11-03 | Gp4 | g.chr17:644773G>A    | Missense Mutation | FAM57A   | p.R214Q  | family with sequence si   | 16 (0.00)  | 37 (0.16)  | 0.43 |
| 11-03 | Gp4 | g.chr6:24832579C>A   | Missense Mutation | FAM65B   | p.S771I  | family with sequence si   | 35 (0.00)  | 27 (0.19)  | 0.49 |
| 11-03 | Gp4 | g.chr5:94728567C>T   | Missense Mutation | FAM81B   | p.P65L   | family with sequence si   | 29 (0.00)  | 34 (0.26)  | 0.71 |
| 11-03 | Gp4 | g.chr8:124810380G>T  | Missense Mutation | FAM91A1  | p.A488S  | family with sequence si   | 106 (0.00) | 106 (0.19) | 0.50 |
| 11-03 | Gp4 | g.chr3:10119798C>T   | Silent            | FANCD2   | p.L965L  | Fanconi anemia, comple    | 52 (0.02)  | 35 (0.46)  | 1.22 |
| 11-03 | Gp4 | g.chr3:10127575G>C   | Missense Mutation | FANCD2   | p.E1102Q | Fanconi anemia, comple    | 29 (0.00)  | 20 (0.25)  | 0.67 |



|       |     |                      |                   |        |          |                            |            |            |      |
|-------|-----|----------------------|-------------------|--------|----------|----------------------------|------------|------------|------|
| 11-03 | Gp4 | g.chr9:35074390C>T   | Missense Mutation | FANCG  | p.G580R  | Fanconi anemia, comple     | 24 (0.00)  | 35 (0.29)  | 0.76 |
| 11-03 | Gp4 | g.chr6:5545437G>A    | Nonsense Mutation | FARS2  | p.W310*  | phenylalanyl-tRNA syn      | 49 (0.00)  | 40 (0.17)  | 0.47 |
| 11-03 | Gp4 | g.chr6:5545511G>T    | Nonsense Mutation | FARS2  | p.E335*  | phenylalanyl-tRNA syn      | 55 (0.00)  | 23 (0.39)  | 1.04 |
| 11-03 | Gp4 | g.chr4:187524612G>A  | Missense Mutation | FAT1   | p.P3690S | FAT atypical cadherin      | 182 (0.00) | 16 (0.38)  | 1.00 |
| 11-03 | Gp4 | g.chr11:92087251G>A  | Missense Mutation | FAT3   | p.G508E  | FAT atypical cadherin      | 361 (0.00) | 18 (0.33)  | 0.89 |
| 11-03 | Gp4 | g.chr11:92577131C>G  | Missense Mutation | FAT3   | p.S3383C | FAT atypical cadherin      | 329 (0.00) | 17 (0.29)  | 0.78 |
| 11-03 | Gp4 | g.chr22:45996264G>C  | Missense Mutation | FBLN1  | p.G684R  | fibulin 1                  | 86 (0.00)  | 38 (0.16)  | 0.42 |
| 11-03 | Gp4 | g.chr5:127595246C>A  | Missense Mutation | FBN2   | p.K2880N | fibrillin 2                | 22 (0.00)  | 12 (0.42)  | 1.11 |
| 11-03 | Gp4 | g.chr6:146127125G>T  | Silent            | FBXO30 | p.A139A  | F-box protein 30           | 44 (0.00)  | 28 (0.18)  | 0.48 |
| 11-03 | Gp4 | g.chr22:32894224C>A  | Missense Mutation | FBXO7  | p.P426T  | F-box protein 7            | 68 (0.01)  | 19 (0.32)  | 0.84 |
| 11-03 | Gp4 | g.chr22:32894225C>A  | Missense Mutation | FBXO7  | p.P426H  | F-box protein 7            | 68 (0.01)  | 19 (0.32)  | 0.84 |
| 11-03 | Gp4 | g.chr12:117383306G>A | Silent            | FBXW8  | p.K187K  | F-box and WD repeat d      | 21 (0.00)  | 37 (0.14)  | 0.47 |
| 11-03 | Gp4 | g.chr1:207133037C>T  | Nonsense Mutation | FCAMR  | p.W520*  | Fc receptor, IgA, IgM, h   | 41 (0.00)  | 37 (0.32)  | 0.86 |
| 11-03 | Gp4 | g.chr1:157557187C>A  | Silent            | FCRL4  | p.T242T  | Fc receptor-like 4         | 61 (0.00)  | 20 (0.55)  | 1.47 |
| 11-03 | Gp4 | g.chr20:6077588C>T   | Silent            | FERMT1 | p.L350L  | fermitin family member     | 40 (0.00)  | 36 (0.17)  | 0.44 |
| 11-03 | Gp4 | g.chr4:155507487G>A  | Missense Mutation | FGA    | p.S365F  | fibrinogen alpha chain     | 17 (0.00)  | 11 (0.64)  | 1.70 |
| 11-03 | Gp4 | g.chr11:69588238C>T  | Missense Mutation | FGF4   | p.E154K  | fibroblast growth factor   | 18 (0.00)  | 29 (0.34)  | 0.92 |
| 11-03 | Gp4 | g.chr10:123353261G>T | Missense Mutation | FGFR2  | p.S24Y   | fibroblast growth factor   | 105 (0.00) | 50 (0.18)  | 0.48 |
| 11-03 | Gp4 | g.chr1:59787369C>A   | Missense Mutation | FGGY   | p.H50N   | FGGY carbohydrate kin      | 33 (0.00)  | 28 (0.18)  | 0.48 |
| 11-03 | Gp4 | g.chr1:15692425G>T   | Missense Mutation | FHAD1  | p.L1028F | forkhead-associated (FH    | 28 (0.00)  | 29 (0.17)  | 0.46 |
| 11-03 | Gp4 | g.chr2:71012575G>C   | Missense Mutation | FIGLA  | p.T194S  | folliculogenesis specifi   | 27 (0.00)  | 26 (0.65)  | 1.74 |
| 11-03 | Gp4 | g.chr7:50513278C>T   | Missense Mutation | FIGNL1 | p.A570T  | fidgetin-like 1            | 56 (0.00)  | 21 (0.33)  | 0.89 |
| 11-03 | Gp4 | g.chr6:76022871T>C   | Missense Mutation | FILIP1 | p.S893G  | filamin A interacting pr   | 37 (0.00)  | 26 (0.27)  | 0.72 |
| 11-03 | Gp4 | g.chr6:76023545C>A   | Missense Mutation | FILIP1 | p.R668I  | filamin A interacting pr   | 90 (0.00)  | 68 (0.50)  | 1.33 |
| 11-03 | Gp4 | g.chr12:2906420G>A   | Silent            | FKBP4  | p.K74K   | FK506 binding protein      | 18 (0.00)  | 41 (0.12)  | 0.41 |
| 11-03 | Gp4 | g.chr1:152276060C>T  | Missense Mutation | FLG    | p.G3768R | filaggrin                  | 98 (0.00)  | 29 (0.31)  | 0.83 |
| 11-03 | Gp4 | g.chr15:33261589G>A  | Silent            | FMN1   | p.H771H  | formin 1                   | 100 (0.00) | 103 (0.29) | 0.78 |
| 11-03 | Gp4 | g.chr2:216298075C>T  | Silent            | FN1    | p.G129G  | fibronectin 1              | 23 (0.00)  | 35 (0.14)  | 0.38 |
| 11-03 | Gp4 | g.chr5:131008518G>A  | Missense Mutation | FNIP1  | p.T495I  | folliculin interacting pro | 22 (0.00)  | 18 (0.33)  | 0.89 |
| 11-03 | Gp4 | g.chr14:65527907T>A  | Silent            | FNTB   | p.T397T  | farnesyltransferase, CA    | 34 (0.00)  | 19 (0.47)  | 1.26 |
| 11-03 | Gp4 | g.chr9:20770060G>A   | Silent            | FOCAD  | p.A243A  | focadhesin                 | 29 (0.00)  | 31 (0.16)  | 0.43 |
| 11-03 | Gp4 | g.chr11:89424165G>A  | RNA               | FOLH1B |          | folate hydrolase 1B        | 45 (0.00)  | 30 (0.17)  | 0.44 |
| 11-03 | Gp4 | g.chr4:79301096G>T   | Missense Mutation | FRAS1  | p.W1170L | Fraser extracellular mat   | 23 (0.00)  | 25 (0.36)  | 0.96 |
| 11-03 | Gp4 | g.chr4:144498811C>A  | Missense Mutation | FREM3  | p.D2125Y | FRAS1 related extracell    | 18 (0.00)  | 12 (0.50)  | 1.33 |
| 11-03 | Gp4 | g.chr4:144618317G>C  | Missense Mutation | FREM3  | p.S1171C | FRAS1 related extracell    | 68 (0.01)  | 94 (0.23)  | 0.62 |

|       |     |                      |                   |         |          |                           |            |            |      |
|-------|-----|----------------------|-------------------|---------|----------|---------------------------|------------|------------|------|
| 11-03 | Gp4 | g.chr4:48502096A>G   | Silent            | FRYL    | p.L2912L | FRY-like                  | 22 (0.00)  | 41 (0.22)  | 0.59 |
| 11-03 | Gp4 | g.chr4:48542481G>A   | Missense Mutation | FRYL    | p.L2062F | FRY-like                  | 39 (0.00)  | 17 (0.65)  | 1.73 |
| 11-03 | Gp4 | g.chr15:83451551A>T  | Missense Mutation | FSD2    | p.I321K  | fibronectin type III and  | 104 (0.00) | 49 (0.22)  | 0.60 |
| 11-03 | Gp4 | g.chr15:83451553G>T  | Missense Mutation | FSD2    | p.F320L  | fibronectin type III and  | 102 (0.00) | 49 (0.20)  | 0.54 |
| 11-03 | Gp4 | g.chr2:186661577A>G  | Silent            | FSIP2   | p.R3238R | fibrous sheath interactin | 51 (0.00)  | 53 (0.21)  | 0.55 |
| 11-03 | Gp4 | g.chr17:61898798G>A  | Missense Mutation | FTSJ3   | p.T601I  | FtsJ homolog 3 (E. coli)  | 53 (0.00)  | 30 (0.23)  | 0.62 |
| 11-03 | Gp4 | g.chr16:31195577G>A  | Missense Mutation | FUS     | p.G128E  | FUS RNA binding prote     | 42 (0.00)  | 44 (0.27)  | 0.73 |
| 11-03 | Gp4 | g.chr11:86663478G>C  | Missense Mutation | FZD4    | p.T107R  | frizzled class receptor 4 | 36 (0.00)  | 42 (0.17)  | 0.44 |
| 11-03 | Gp4 | g.chr11:77961221C>T  | Missense Mutation | GAB2    | p.R201Q  | GRB2-associated bindin    | 79 (0.00)  | 30 (0.17)  | 0.44 |
| 11-03 | Gp4 | g.chr9:101065664G>A  | Silent            | GABBR2  | p.N757N  | gamma-aminobutyric ac     | 51 (0.00)  | 54 (0.15)  | 0.40 |
| 11-03 | Gp4 | g.chr5:160757962G>A  | Silent            | GABRB2  | p.P335P  | gamma-aminobutyric ac     | 17 (0.00)  | 27 (0.26)  | 0.69 |
| 11-03 | Gp4 | g.chr5:160761788T>C  | Missense Mutation | GABRB2  | p.Y268C  | gamma-aminobutyric ac     | 32 (0.00)  | 29 (0.21)  | 0.55 |
| 11-03 | Gp4 | g.chr5:161524758C>A  | Missense Mutation | GABRG2  | p.P148T  | gamma-aminobutyric ac     | 27 (0.00)  | 28 (0.18)  | 0.48 |
| 11-03 | Gp4 | g.chr3:97711741G>A   | RNA               | GABRR3  |          | gamma-aminobutyric ac     | 47 (0.00)  | 162 (0.17) | 0.44 |
| 11-03 | Gp4 | g.chr2:171713588G>A  | Missense Mutation | GAD1    | p.A492T  | glutamate decarboxylas    | 82 (0.00)  | 41 (0.39)  | 1.04 |
| 11-03 | Gp4 | g.chr7:151791362C>A  | Missense Mutation | GALNT11 | p.S17Y   | polypeptide N-acetylga    | 30 (0.00)  | 28 (0.18)  | 0.48 |
| 11-03 | Gp4 | g.chr3:16250017G>A   | Missense Mutation | GALNT15 | p.V307M  | polypeptide N-acetylga    | 48 (0.00)  | 67 (0.15)  | 0.40 |
| 11-03 | Gp4 | g.chr9:128118044A>T  | Missense Mutation | GAPVD1  | p.Q1272H | GTPase activating prote   | 16 (0.00)  | 30 (0.47)  | 1.24 |
| 11-03 | Gp4 | g.chr1:89524662C>A   | Missense Mutation | GBP1    | p.V165F  | guanylate binding protei  | 74 (0.00)  | 19 (0.53)  | 1.40 |
| 11-03 | Gp4 | g.chr2:237074668G>T  | Silent            | GBX2    | p.S312S  | gastrulation brain home   | 55 (0.00)  | 29 (0.21)  | 0.55 |
| 11-03 | Gp4 | g.chr6:52993052C>T   | Silent            | GCM1    | p.L421L  | glial cells missing homo  | 32 (0.00)  | 78 (0.27)  | 0.72 |
| 11-03 | Gp4 | g.chr6:10626779G>A   | Missense Mutation | GCNT2   | p.R383K  | glucosaminyl (N-acetyl)   | 60 (0.02)  | 102 (0.17) | 0.44 |
| 11-03 | Gp4 | g.chr6:10634658G>C   | Silent            | GCNT6   | p.V222V  | glucosaminyl (N-acetyl)   | 30 (0.00)  | 27 (0.30)  | 0.79 |
| 11-03 | Gp4 | g.chr16:30122831C>T  | Missense Mutation | GDPD3   | p.M195I  | glycerophosphodiester p   | 72 (0.00)  | 40 (0.15)  | 0.40 |
| 11-03 | Gp4 | g.chrX:14027121C>A   | Missense Mutation | GEMIN8  | p.A214S  | gem (nuclear organelle)   | 23 (0.00)  | 11 (0.55)  | 0.91 |
| 11-03 | Gp4 | g.chr2:69556920C>G   | Missense Mutation | GFPT1   | p.S480T  | glutamine--fructose-6-p   | 98 (0.00)  | 39 (0.18)  | 0.48 |
| 11-03 | Gp4 | g.chr3:172163191G>A  | Silent            | GHSR    | p.S287S  | growth hormone secreta    | 19 (0.00)  | 31 (0.23)  | 0.60 |
| 11-03 | Gp4 | g.chr2:233681708G>A  | Missense Mutation | GIGYF2  | p.R773K  | GRB10 interacting GYF     | 79 (0.01)  | 65 (0.22)  | 0.57 |
| 11-03 | Gp4 | g.chr7:150171621C>T  | Missense Mutation | GIMAP8  | p.R402W  | GTPase, IMAP family n     | 56 (0.02)  | 59 (0.17)  | 0.45 |
| 11-03 | Gp4 | g.chr14:24702466C>T  | Missense Mutation | GMPR2   | p.H3Y    | guanosine monophosph      | 103 (0.00) | 93 (0.27)  | 0.72 |
| 11-03 | Gp4 | g.chr12:102158017G>T | Missense Mutation | GNPTAB  | p.P893Q  | N-acetylglucosamine-1-    | 31 (0.00)  | 25 (0.28)  | 0.95 |
| 11-03 | Gp4 | g.chr15:23265489C>T  | Missense Mutation | GOLGA8I | p.P611L  | golgin A8 family, mem     | 55 (0.00)  | 27 (0.41)  | 1.09 |
| 11-03 | Gp4 | g.chr3:121415192C>T  | Missense Mutation | GOLGB1  | p.R1393K | golgin B1                 | 63 (0.00)  | 31 (0.26)  | 0.69 |
| 11-03 | Gp4 | g.chr6:24445970G>A   | Missense Mutation | GPLD1   | p.T637I  | glycosylphosphatidylin    | 40 (0.00)  | 61 (0.15)  | 0.39 |
| 11-03 | Gp4 | g.chr13:99947755G>A  | Silent            | GPR183  | p.C215C  | G protein-coupled recep   | 49 (0.00)  | 49 (0.18)  | 0.49 |

|       |     |                     |                   |          |          |                           |            |           |      |
|-------|-----|---------------------|-------------------|----------|----------|---------------------------|------------|-----------|------|
| 11-03 | Gp4 | g.chr2:133174867C>A | Silent            | GPR39    | p.L84L   | G protein-coupled recep   | 60 (0.00)  | 12 (0.67) | 1.78 |
| 11-03 | Gp4 | g.chrX:19020969C>T  | Missense Mutation | GPR64    | p.G739D  | G protein-coupled recep   | 33 (0.00)  | 23 (0.26) | 0.43 |
| 11-03 | Gp4 | g.chr1:145771665G>A | Silent            | GPR89A   | p.I325I  | G protein-coupled recep   | 24 (0.04)  | 27 (0.37) | 0.99 |
| 11-03 | Gp4 | g.chr1:145771683G>A | Silent            | GPR89A   | p.V319V  | G protein-coupled recep   | 25 (0.00)  | 31 (0.16) | 0.43 |
| 11-03 | Gp4 | g.chr5:90072305G>A  | Missense Mutation | GPR98    | p.A4147T | G protein-coupled recep   | 22 (0.00)  | 43 (0.16) | 0.43 |
| 11-03 | Gp4 | g.chr1:109466666G>A | Missense Mutation | GPSM2    | p.D549N  | G-protein signaling moc   | 20 (0.00)  | 28 (0.36) | 0.95 |
| 11-03 | Gp4 | g.chr12:13241842C>T | Splice Site       | GSG1     | p.G122G  | germ cell associated 1    | 24 (0.00)  | 32 (0.19) | 0.63 |
| 11-03 | Gp4 | g.chr12:13243599C>A | Missense Mutation | GSG1     | p.A68S   | germ cell associated 1    | 37 (0.00)  | 15 (0.33) | 1.12 |
| 11-03 | Gp4 | g.chr11:18373979C>A | Missense Mutation | GTF2H1   | p.P416T  | general transcription fac | 32 (0.00)  | 46 (0.26) | 0.70 |
| 11-03 | Gp4 | g.chr7:73973268G>A  | Missense Mutation | GTF2IRD1 | p.E729K  | GTF2I repeat domain cc    | 15 (0.00)  | 17 (0.29) | 0.78 |
| 11-03 | Gp4 | g.chr12:14774130C>T | Silent            | GUCY2C   | p.A874A  | guanylate cyclase 2C (h   | 31 (0.00)  | 31 (0.16) | 0.54 |
| 11-03 | Gp4 | g.chr2:127453575C>T | Missense Mutation | GYPC     | p.R82C   | glycophorin C (Gerbich    | 20 (0.00)  | 14 (0.50) | 1.33 |
| 11-03 | Gp4 | g.chr5:156479604G>T | Missense Mutation | HAVCR1   | p.S147R  | hepatitis A virus cellula | 46 (0.00)  | 67 (0.48) | 1.27 |
| 11-03 | Gp4 | g.chr19:610381C>G   | Silent            | HCN2     | p.G520G  | hyperpolarization activa  | 23 (0.00)  | 28 (0.18) | 0.61 |
| 11-03 | Gp4 | g.chr1:32782309G>C  | Missense Mutation | HDAC1    | p.S69T   | histone deacetylase 1     | 35 (0.00)  | 35 (0.17) | 0.46 |
| 11-03 | Gp4 | g.chr5:141009676G>A | Missense Mutation | HDAC3    | p.L100F  | histone deacetylase 3     | 60 (0.00)  | 42 (0.31) | 0.83 |
| 11-03 | Gp4 | g.chr12:48179217G>T | Missense Mutation | HDAC7    | p.P876H  | histone deacetylase 7     | 58 (0.00)  | 76 (0.14) | 0.49 |
| 11-03 | Gp4 | g.chr7:18548614G>A  | Intron            | HDAC9    |          | histone deacetylase 9     | 81 (0.01)  | 19 (0.26) | 0.70 |
| 11-03 | Gp4 | g.chr7:18553109G>A  | Intron            | HDAC9    |          | histone deacetylase 9     | 46 (0.00)  | 49 (0.16) | 0.44 |
| 11-03 | Gp4 | g.chr7:18553235C>A  | Intron            | HDAC9    |          | histone deacetylase 9     | 55 (0.00)  | 59 (0.15) | 0.41 |
| 11-03 | Gp4 | g.chr7:18615773T>A  | Intron            | HDAC9    |          | histone deacetylase 9     | 28 (0.00)  | 13 (0.38) | 1.03 |
| 11-03 | Gp4 | g.chr7:18657003G>C  | Intron            | HDAC9    |          | histone deacetylase 9     | 149 (0.01) | 55 (0.15) | 0.39 |
| 11-03 | Gp4 | g.chr7:18657867C>T  | Intron            | HDAC9    |          | histone deacetylase 9     | 17 (0.00)  | 28 (0.25) | 0.67 |
| 11-03 | Gp4 | g.chr7:18660428A>G  | Intron            | HDAC9    |          | histone deacetylase 9     | 60 (0.00)  | 29 (0.24) | 0.64 |
| 11-03 | Gp4 | g.chr7:18667258G>A  | Intron            | HDAC9    |          | histone deacetylase 9     | 34 (0.00)  | 41 (0.15) | 0.39 |
| 11-03 | Gp4 | g.chr7:18701009G>A  | Intron            | HDAC9    |          | histone deacetylase 9     | 49 (0.00)  | 27 (0.37) | 0.99 |
| 11-03 | Gp4 | g.chr7:18813098G>T  | Intron            | HDAC9    |          | histone deacetylase 9     | 20 (0.00)  | 30 (0.50) | 1.33 |
| 11-03 | Gp4 | g.chr7:18814673G>T  | Intron            | HDAC9    |          | histone deacetylase 9     | 42 (0.00)  | 49 (0.22) | 0.60 |
| 11-03 | Gp4 | g.chr7:18816504G>A  | Intron            | HDAC9    |          | histone deacetylase 9     | 43 (0.00)  | 27 (0.19) | 0.49 |
| 11-03 | Gp4 | g.chr7:18825084G>T  | Intron            | HDAC9    |          | histone deacetylase 9     | 27 (0.00)  | 28 (0.21) | 0.57 |
| 11-03 | Gp4 | g.chr7:18828680G>A  | Intron            | HDAC9    |          | histone deacetylase 9     | 55 (0.00)  | 33 (0.15) | 0.40 |
| 11-03 | Gp4 | g.chr7:18843738G>A  | Intron            | HDAC9    |          | histone deacetylase 9     | 71 (0.00)  | 38 (0.21) | 0.56 |
| 11-03 | Gp4 | g.chr7:18860577G>A  | Intron            | HDAC9    |          | histone deacetylase 9     | 31 (0.00)  | 19 (0.42) | 1.12 |
| 11-03 | Gp4 | g.chr2:242206282C>T | Start Codon SNP   | HDLBP    | p.M1I    | high density lipoprotein  | 88 (0.00)  | 33 (0.21) | 0.57 |
| 11-03 | Gp4 | g.chr14:31774331C>T | Silent            | HEATR5A  | p.K1673K | HEAT repeat containing    | 63 (0.00)  | 26 (0.27) | 0.72 |

|       |     |                      |                   |              |          |                           |            |           |      |
|-------|-----|----------------------|-------------------|--------------|----------|---------------------------|------------|-----------|------|
| 11-03 | Gp4 | g.chr2:37229529C>T   | Missense Mutation | HEATR5B      | p.R1746Q | HEAT repeat containing    | 56 (0.00)  | 67 (0.18) | 0.48 |
| 11-03 | Gp4 | g.chr3:124731604G>A  | Missense Mutation | HEG1         | p.A940V  | heart development prote   | 61 (0.00)  | 33 (0.33) | 0.89 |
| 11-03 | Gp4 | g.chr17:65105572C>T  | Silent            | HELZ         | p.Q1383Q | helicase with zinc finger | 37 (0.00)  | 31 (0.29) | 0.77 |
| 11-03 | Gp4 | g.chr9:100692400G>A  | Missense Mutation | HEMGN        | p.P426L  | hemogen                   | 48 (0.00)  | 38 (0.16) | 0.42 |
| 11-03 | Gp4 | g.chr11:93797589C>T  | Missense Mutation | HEPHL1       | p.L241F  | hephaestin-like 1         | 24 (0.00)  | 54 (0.19) | 0.49 |
| 11-03 | Gp4 | g.chr11:93806497G>A  | Missense Mutation | HEPHL1       | p.G466S  | hephaestin-like 1         | 42 (0.00)  | 55 (0.20) | 0.53 |
| 11-03 | Gp4 | g.chr11:93844110T>A  | Silent            | HEPHL1       | p.P1029P | hephaestin-like 1         | 72 (0.00)  | 35 (0.14) | 0.38 |
| 11-03 | Gp4 | g.chr15:63955300C>A  | Missense Mutation | HERC1        | p.E2928D | HECT and RLD domain       | 87 (0.01)  | 25 (0.28) | 0.75 |
| 11-03 | Gp4 | g.chr15:64005697C>T  | Missense Mutation | HERC1        | p.A1440T | HECT and RLD domain       | 33 (0.00)  | 23 (0.39) | 1.04 |
| 11-03 | Gp4 | g.chr10:69682737G>A  | Missense Mutation | HERC4        | p.S1042F | HECT and RLD domain       | 34 (0.03)  | 34 (0.32) | 0.86 |
| 11-03 | Gp4 | g.chr1:91843604G>T   | Missense Mutation | HFM1         | p.A458E  | HFM1, ATP-dependent       | 23 (0.00)  | 11 (0.45) | 1.21 |
| 11-03 | Gp4 | g.chr10:102296182G>T | Silent            | HIF1AN       | p.L64L   | hypoxia inducible factor  | 61 (0.00)  | 38 (0.16) | 0.42 |
| 11-03 | Gp4 | g.chr7:75172226G>T   | Missense Mutation | HIP1         | p.A894D  | huntingtin interacting pr | 26 (0.00)  | 38 (0.16) | 0.42 |
| 11-03 | Gp4 | g.chr11:33308963C>T  | Missense Mutation | HIPK3        | p.R335W  | homeodomain interactin    | 70 (0.01)  | 99 (0.18) | 0.48 |
| 11-03 | Gp4 | g.chr6:27114424C>A   | Missense Mutation | HIST1H2BK    | p.D52Y   | histone cluster 1, H2bk   | 98 (0.00)  | 58 (0.16) | 0.41 |
| 11-03 | Gp4 | g.chr6:143074331C>T  | Silent            | HIVEP2       | p.K2418K | human immunodeficien      | 25 (0.04)  | 26 (0.19) | 0.51 |
| 11-03 | Gp4 | g.chr10:71136764G>T  | Missense Mutation | HK1          | p.G317V  | hexokinase 1              | 15 (0.00)  | 22 (0.45) | 1.21 |
| 11-03 | Gp4 | g.chr10:71007159C>T  | Silent            | HKDC1        | p.L359L  | hexokinase domain cont    | 59 (0.02)  | 35 (0.23) | 0.61 |
| 11-03 | Gp4 | g.chr20:30137041C>G  | Missense Mutation | HM13         | p.A191G  | histocompatibility (min   | 30 (0.03)  | 21 (0.33) | 0.89 |
| 11-03 | Gp4 | g.chr1:186088930C>T  | Missense Mutation | HMCN1        | p.P4004S | hemicentin 1              | 39 (0.00)  | 33 (0.15) | 0.40 |
| 11-03 | Gp4 | g.chr5:74646684C>A   | Missense Mutation | HMGCR        | p.A284E  | 3-hydroxy-3-methylglut    | 17 (0.00)  | 21 (0.76) | 2.03 |
| 11-03 | Gp4 | g.chr16:72094749C>A  | Missense Mutation | HP           | p.S394Y  | haptoglobin               | 79 (0.01)  | 27 (0.37) | 0.99 |
| 11-03 | Gp4 | g.chr1:21091942G>A   | Missense Mutation | HP1BP3       | p.P273L  | heterochromatin protein   | 19 (0.00)  | 23 (0.52) | 1.39 |
| 11-03 | Gp4 | g.chr10:100904047C>A | Silent            | HPSE2        | p.L186L  | heparanase 2 (inactive)   | 30 (0.00)  | 13 (0.38) | 1.03 |
| 11-03 | Gp4 | g.chr11:63257758G>A  | Missense Mutation | HRASLS5      | p.P76S   | HRAS-like suppressor f    | 119 (0.00) | 56 (0.16) | 0.43 |
| 11-03 | Gp4 | g.chr17:62750640C>T  | RNA               | hsa-mir-6080 |          |                           | 112 (0.00) | 59 (0.25) | 0.68 |
| 11-03 | Gp4 | g.chr5:118814534T>A  | Missense Mutation | HSD17B4      | p.I129N  | hydroxysteroid (17-beta   | 30 (0.00)  | 20 (0.30) | 0.80 |
| 11-03 | Gp4 | g.chr5:118814550T>A  | Silent            | HSD17B4      | p.A134A  | hydroxysteroid (17-beta   | 31 (0.00)  | 23 (0.30) | 0.81 |
| 11-03 | Gp4 | g.chr12:57178746A>G  | Missense Mutation | HSD17B6      | p.K228E  | hydroxysteroid (17-beta   | 57 (0.00)  | 37 (0.14) | 0.45 |
| 11-03 | Gp4 | g.chr10:38654484G>A  | RNA               | HSD17B7P2    |          |                           | 64 (0.00)  | 23 (0.30) | 0.81 |
| 11-03 | Gp4 | g.chr16:84158313C>T  | Missense Mutation | HSDL1        | p.M305I  | hydroxysteroid dehydro    | 18 (0.00)  | 42 (0.40) | 1.08 |
| 11-03 | Gp4 | g.chr6:44221010C>T   | Silent            | HSP90AB1     | p.L654L  | heat shock protein 90kD   | 38 (0.00)  | 41 (0.24) | 0.65 |
| 11-03 | Gp4 | g.chr10:14881910C>T  | Missense Mutation | HSPA14       | p.R22W   | heat shock 70kDa protei   | 30 (0.00)  | 43 (0.16) | 0.43 |
| 11-03 | Gp4 | g.chr5:132439982C>G  | Missense Mutation | HSPA4        | p.P793A  | heat shock 70kDa protei   | 25 (0.00)  | 25 (0.24) | 0.64 |
| 11-03 | Gp4 | g.chr1:23520655G>A   | Silent            | HTR1D        | p.L20L   | 5-hydroxytryptamine (se   | 16 (0.00)  | 30 (0.23) | 0.62 |

|       |     |                      |                   |             |          |                                         |            |           |      |
|-------|-----|----------------------|-------------------|-------------|----------|-----------------------------------------|------------|-----------|------|
| 11-03 | Gp4 | g.chr10:92509250G>A  | Missense Mutation | HTR7        | p.T214I  | 5-hydroxytryptamine (serotonin)         | 42 (0.00)  | 28 (0.21) | 0.57 |
| 11-03 | Gp4 | g.chr16:70843777G>T  | Missense Mutation | HYDIN       | p.P4931H | HYDIN, axonemal centrodome              | 26 (0.00)  | 46 (0.28) | 0.75 |
| 11-03 | Gp4 | g.chr16:70916649G>A  | Missense Mutation | HYDIN       | p.R3377C | HYDIN, axonemal centrodome              | 59 (0.00)  | 9 (0.56)  | 1.48 |
| 11-03 | Gp4 | g.chr7:8198177G>A    | Missense Mutation | ICA1        | p.H229Y  | islet cell autoantigen 1, cytoplasmic   | 26 (0.00)  | 50 (0.26) | 0.69 |
| 11-03 | Gp4 | g.chr6:52870065C>A   | Missense Mutation | ICK         | p.G594V  | intestinal cell (MAK-like) cytoplasmic  | 29 (0.00)  | 19 (0.63) | 1.68 |
| 11-03 | Gp4 | g.chr8:39872881C>T   | Silent            | IDO2        | p.H328H  | indoleamine 2,3-dioxygenase 2           | 55 (0.00)  | 16 (0.31) | 0.83 |
| 11-03 | Gp4 | g.chr2:27680515C>T   | Silent            | IFT172      | p.E1073E | intraflagellar transport 172            | 143 (0.00) | 43 (0.16) | 0.43 |
| 11-03 | Gp4 | g.chr11:68673544C>T  | Nonsense Mutation | IGHMBP2     | p.Q32*   | immunoglobulin mu chain                 | 61 (0.00)  | 24 (0.25) | 0.67 |
| 11-03 | Gp4 | g.chr14:106733340G>T | RNA               | IGHV1-24    |          | immunoglobulin heavy chain              | 44 (0.02)  | 22 (0.23) | 0.61 |
| 11-03 | Gp4 | g.chr21:10862657C>A  | RNA               | IGHV1OR21-1 |          | immunoglobulin heavy chain              | 153 (0.00) | 42 (0.14) | 0.38 |
| 11-03 | Gp4 | g.chr14:106805281C>T | RNA               | IGHV4-31    |          | immunoglobulin heavy chain              | 21 (0.00)  | 31 (0.26) | 0.69 |
| 11-03 | Gp4 | g.chr14:106829645C>A | RNA               | IGHV4-34    |          | immunoglobulin heavy chain              | 19 (0.00)  | 11 (0.55) | 1.45 |
| 11-03 | Gp4 | g.chr22:22550675C>A  | RNA               | IGLV6-57    |          | immunoglobulin lambda chain             | 29 (0.00)  | 19 (0.37) | 0.98 |
| 11-03 | Gp4 | g.chr3:151154764G>A  | Nonsense Mutation | IGSF10      | p.R2529* | immunoglobulin superfamily 10           | 37 (0.03)  | 33 (0.42) | 1.13 |
| 11-03 | Gp4 | g.chr15:81598313T>A  | Missense Mutation | IL16        | p.V1162D | interleukin 16                          | 57 (0.00)  | 22 (0.27) | 0.73 |
| 11-03 | Gp4 | g.chr2:102959757C>T  | Silent            | IL1RL1      | p.D284D  | interleukin 1 receptor-like 1           | 58 (0.02)  | 42 (0.17) | 0.44 |
| 11-03 | Gp4 | g.chr3:100948289C>T  | Missense Mutation | IMPG2       | p.V1190M | interphotoreceptor matrix protein 2     | 34 (0.00)  | 12 (0.42) | 1.11 |
| 11-03 | Gp4 | g.chr2:121107258C>T  | Silent            | INHBB       | p.P344P  | inhibin, beta B                         | 20 (0.00)  | 30 (0.33) | 0.89 |
| 11-03 | Gp4 | g.chr2:99169333G>A   | Silent            | INPP4A      | p.L421L  | inositol polyphosphate 4-kinase type IV | 41 (0.00)  | 42 (0.19) | 0.51 |
| 11-03 | Gp4 | g.chr4:143008521G>A  | Intron            | INPP4B      |          | inositol polyphosphate 4-kinase type IV | 33 (0.00)  | 24 (0.42) | 1.11 |
| 11-03 | Gp4 | g.chr4:143071011G>A  | Intron            | INPP4B      |          | inositol polyphosphate 4-kinase type IV | 38 (0.00)  | 25 (0.32) | 0.85 |
| 11-03 | Gp4 | g.chr4:143072588T>A  | Intron            | INPP4B      |          | inositol polyphosphate 4-kinase type IV | 39 (0.00)  | 31 (0.16) | 0.43 |
| 11-03 | Gp4 | g.chr4:143092403C>T  | Intron            | INPP4B      |          | inositol polyphosphate 4-kinase type IV | 17 (0.00)  | 32 (0.28) | 0.75 |
| 11-03 | Gp4 | g.chr4:143100757G>A  | Intron            | INPP4B      |          | inositol polyphosphate 4-kinase type IV | 31 (0.00)  | 38 (0.18) | 0.49 |
| 11-03 | Gp4 | g.chr4:143161529C>T  | Intron            | INPP4B      |          | inositol polyphosphate 4-kinase type IV | 49 (0.00)  | 41 (0.17) | 0.46 |
| 11-03 | Gp4 | g.chr4:143163000G>T  | Intron            | INPP4B      |          | inositol polyphosphate 4-kinase type IV | 27 (0.00)  | 35 (0.14) | 0.38 |
| 11-03 | Gp4 | g.chr4:143235493C>G  | Intron            | INPP4B      |          | inositol polyphosphate 4-kinase type IV | 48 (0.02)  | 51 (0.18) | 0.47 |
| 11-03 | Gp4 | g.chr4:143260693G>A  | Intron            | INPP4B      |          | inositol polyphosphate 4-kinase type IV | 32 (0.00)  | 31 (0.16) | 0.43 |
| 11-03 | Gp4 | g.chr4:143313802G>A  | Intron            | INPP4B      |          | inositol polyphosphate 4-kinase type IV | 19 (0.00)  | 11 (0.64) | 1.70 |
| 11-03 | Gp4 | g.chr4:143320029C>A  | Intron            | INPP4B      |          | inositol polyphosphate 4-kinase type IV | 64 (0.00)  | 28 (0.29) | 0.76 |
| 11-03 | Gp4 | g.chr4:143335840G>A  | Intron            | INPP4B      |          | inositol polyphosphate 4-kinase type IV | 26 (0.00)  | 25 (0.24) | 0.64 |
| 11-03 | Gp4 | g.chr4:143335977G>A  | Intron            | INPP4B      |          | inositol polyphosphate 4-kinase type IV | 33 (0.00)  | 32 (0.50) | 1.33 |
| 11-03 | Gp4 | g.chr4:143370435C>A  | Intron            | INPP4B      |          | inositol polyphosphate 4-kinase type IV | 53 (0.00)  | 47 (0.23) | 0.62 |
| 11-03 | Gp4 | g.chr4:143415080C>A  | Intron            | INPP4B      |          | inositol polyphosphate 4-kinase type IV | 22 (0.05)  | 20 (0.55) | 1.47 |
| 11-03 | Gp4 | g.chr4:143423439G>T  | Intron            | INPP4B      |          | inositol polyphosphate 4-kinase type IV | 64 (0.00)  | 57 (0.21) | 0.56 |

|       |     |                     |                   |             |          |                                              |           |      |
|-------|-----|---------------------|-------------------|-------------|----------|----------------------------------------------|-----------|------|
| 11-03 | Gp4 | g.chr4:143474390A>T | Intron            | INPP4B      |          | inositol polyphosphate- $\zeta$ 25 (0.00)    | 32 (0.16) | 0.42 |
| 11-03 | Gp4 | g.chr4:143484918C>A | Intron            | INPP4B      |          | inositol polyphosphate- $\zeta$ 31 (0.00)    | 37 (0.24) | 0.65 |
| 11-03 | Gp4 | g.chr4:143626133T>C | Intron            | INPP4B      |          | inositol polyphosphate- $\zeta$ 21 (0.00)    | 26 (0.35) | 0.92 |
| 11-03 | Gp4 | g.chr4:143652105C>A | Intron            | INPP4B      |          | inositol polyphosphate- $\zeta$ 21 (0.00)    | 21 (0.24) | 0.63 |
| 11-03 | Gp4 | g.chr4:143688177C>A | Intron            | INPP4B      |          | inositol polyphosphate- $\zeta$ 28 (0.00)    | 26 (0.19) | 0.51 |
| 11-03 | Gp4 | g.chr4:143723315C>T | Intron            | INPP4B      |          | inositol polyphosphate- $\zeta$ 26 (0.00)    | 67 (0.16) | 0.44 |
| 11-03 | Gp4 | g.chr4:143738625C>T | Intron            | INPP4B      |          | inositol polyphosphate- $\zeta$ 20 (0.00)    | 20 (0.25) | 0.67 |
| 11-03 | Gp4 | g.chr4:143743122C>T | Intron            | INPP4B      |          | inositol polyphosphate- $\zeta$ 35 (0.00)    | 32 (0.19) | 0.50 |
| 11-03 | Gp4 | g.chr6:154520888G>C | Missense Mutation | IPCEF1      | p.S275C  | interaction protein for c $\gamma$ 31 (0.00) | 37 (0.27) | 0.72 |
| 11-03 | Gp4 | g.chr15:67687674G>C | Missense Mutation | IQCH        | p.A560P  | IQ motif containing H 35 (0.00)              | 51 (0.18) | 0.47 |
| 11-03 | Gp4 | g.chr15:91027463A>G | Missense Mutation | IQGAP1      | p.Q1267R | IQ motif containing GT $\square$ 44 (0.00)   | 45 (0.40) | 1.07 |
| 11-03 | Gp4 | g.chr12:66622127G>A | Silent            | IRAK3       | p.S288S  | interleukin-1 receptor-a $\zeta$ 37 (0.00)   | 20 (0.35) | 1.17 |
| 11-03 | Gp4 | g.chr15:78782960G>A | Splice Site       | IREB2       |          | iron-responsive element 24 (0.00)            | 30 (0.20) | 0.53 |
| 11-03 | Gp4 | g.chr1:156693188C>T | Missense Mutation | ISG20L2     | p.E339K  | interferon stimulated ex $\zeta$ 42 (0.00)   | 27 (0.33) | 0.89 |
| 11-03 | Gp4 | g.chr19:18546675C>T | Silent            | ISYNA1      | p.S344S  | inositol-3-phosphate syr 26 (0.00)           | 39 (0.15) | 0.41 |
| 11-03 | Gp4 | g.chr5:52206093C>T  | Silent            | ITGA1       | p.C567C  | integrin, alpha 1 39 (0.00)                  | 16 (0.31) | 0.83 |
| 11-03 | Gp4 | g.chr1:145535818G>T | Missense Mutation | ITGA10      | p.R669L  | integrin, alpha 10 19 (0.00)                 | 14 (0.36) | 0.95 |
| 11-03 | Gp4 | g.chr2:187500900G>A | Silent            | ITGAV       | p.R241R  | integrin, alpha V 47 (0.00)                  | 31 (0.16) | 0.43 |
| 11-03 | Gp4 | g.chr10:33200440G>T | Missense Mutation | ITGB1       | p.P623T  | integrin, beta 1 (fibrone $\zeta$ 40 (0.03)  | 28 (0.18) | 0.48 |
| 11-03 | Gp4 | g.chr12:26709168C>T | Silent            | ITPR2       | p.S1654S | inositol 1,4,5-trisphosph 23 (0.00)          | 19 (0.58) | 1.94 |
| 11-03 | Gp4 | g.chr9:24545033G>T  | Missense Mutation | IZUMO3      | p.L110I  | IZUMO family member 50 (0.00)                | 45 (0.20) | 0.53 |
| 11-03 | Gp4 | g.chr3:9934653G>A   | Nonsense Mutation | JAGN1       | p.W48*   | jagunal homolog 1 (Dro 35 (0.00)             | 37 (0.19) | 0.50 |
| 11-03 | Gp4 | g.chr4:6055716G>A   | Silent            | JAKMIP1     | p.L623L  | janus kinase and microt $\zeta$ 40 (0.00)    | 33 (0.15) | 0.40 |
| 11-03 | Gp4 | g.chr10:64966976G>A | Missense Mutation | JMJD1C      | p.H1485Y | jumonji domain containi 37 (0.00)            | 37 (0.16) | 0.43 |
| 11-03 | Gp4 | g.chr15:42138900C>A | Missense Mutation | JMJD7-PLA2C | p.T836K  | JMJD7-PLA2G4B readt 25 (0.00)                | 30 (0.17) | 0.44 |
| 11-03 | Gp4 | g.chr17:47869267C>A | Nonsense Mutation | KAT7        | p.S12*   | K(lysine) acetyltransfer $\zeta$ 21 (0.00)   | 53 (0.15) | 0.40 |
| 11-03 | Gp4 | g.chr13:41766698G>A | Nonsense Mutation | KBTBD7      | p.Q566*  | kelch repeat and BTB (F 56 (0.00)            | 12 (0.67) | 0.65 |
| 11-03 | Gp4 | g.chr1:111216485G>T | Missense Mutation | KCNA3       | p.A316D  | potassium voltage-gated 49 (0.00)            | 34 (0.15) | 0.39 |
| 11-03 | Gp4 | g.chr6:73815050G>A  | Missense Mutation | KCNQ5       | p.G330D  | potassium voltage-gated 72 (0.00)            | 46 (0.57) | 1.51 |
| 11-03 | Gp4 | g.chr8:36675228C>A  | Missense Mutation | KCNU1       | p.F352L  | potassium channel, subf 36 (0.00)            | 20 (0.65) | 0.65 |
| 11-03 | Gp4 | g.chr8:36766895C>A  | Missense Mutation | KCNU1       | p.H725N  | potassium channel, subf 135 (0.00)           | 19 (0.58) | 0.58 |
| 11-03 | Gp4 | g.chr16:67327832C>T | Silent            | KCTD19      | p.K611K  | potassium channel tetra $\zeta$ 124 (0.00)   | 33 (0.15) | 0.40 |
| 11-03 | Gp4 | g.chr22:38877397C>T | Nonsense Mutation | KDELR3      | p.Q178*  | KDEL (Lys-Asp-Glu-L $\zeta$ 25 (0.00)        | 48 (0.19) | 0.50 |
| 11-03 | Gp4 | g.chr1:23403738C>A  | Missense Mutation | KDM1A       | p.F584L  | lysine (K)-specific dem $\zeta$ 37 (0.00)    | 28 (0.32) | 0.86 |
| 11-03 | Gp4 | g.chr12:417122G>T   | Missense Mutation | KDM5A       | p.S1143Y | lysine (K)-specific dem $\zeta$ 71 (0.00)    | 49 (0.14) | 0.48 |

|       |     |                      |                   |          |          |                          |           |            |      |
|-------|-----|----------------------|-------------------|----------|----------|--------------------------|-----------|------------|------|
| 11-03 | Gp4 | g.chr17:26955535G>A  | Nonsense Mutation | KIAA0100 | p.Q1448* | KIAA0100                 | 17 (0.00) | 28 (0.18)  | 0.48 |
| 11-03 | Gp4 | g.chr3:197431449G>A  | Missense Mutation | KIAA0226 | p.L143F  | KIAA0226                 | 56 (0.00) | 73 (0.16)  | 0.44 |
| 11-03 | Gp4 | g.chr9:114124311T>A  | Nonstop Mutation  | KIAA0368 | p.*1840L | KIAA0368                 | 87 (0.00) | 34 (0.24)  | 0.63 |
| 11-03 | Gp4 | g.chr16:15718953G>T  | Silent            | KIAA0430 | p.P534P  | KIAA0430                 | 36 (0.00) | 42 (0.14)  | 0.38 |
| 11-03 | Gp4 | g.chr5:5457479G>T    | Silent            | KIAA0947 | p.V242V  |                          | 32 (0.00) | 25 (0.24)  | 0.64 |
| 11-03 | Gp4 | g.chr5:5457520C>T    | Missense Mutation | KIAA0947 | p.P256L  |                          | 62 (0.00) | 24 (0.25)  | 0.67 |
| 11-03 | Gp4 | g.chr5:5462564C>T    | Silent            | KIAA0947 | p.T1039T |                          | 80 (0.00) | 38 (0.29)  | 0.77 |
| 11-03 | Gp4 | g.chr15:79749305C>A  | Silent            | KIAA1024 | p.P272P  | KIAA1024                 | 19 (0.00) | 23 (0.35)  | 0.93 |
| 11-03 | Gp4 | g.chrX:118223138G>A  | Silent            | KIAA1210 | p.L685L  | KIAA1210                 | 25 (0.04) | 28 (0.29)  | 0.48 |
| 11-03 | Gp4 | g.chr10:24825795C>G  | Silent            | KIAA1217 | p.G852G  | KIAA1217                 | 21 (0.00) | 33 (0.21)  | 0.57 |
| 11-03 | Gp4 | g.chr6:138644850G>T  | Missense Mutation | KIAA1244 | p.M1603I | KIAA1244                 | 93 (0.01) | 92 (0.22)  | 0.58 |
| 11-03 | Gp4 | g.chr8:95539058G>T   | Missense Mutation | KIAA1429 | p.Q472K  | KIAA1429                 | 36 (0.00) | 38 (0.16)  | 0.42 |
| 11-03 | Gp4 | g.chr9:5762588C>T    | Silent            | KIAA1432 | p.I680I  |                          | 22 (0.00) | 27 (0.26)  | 0.69 |
| 11-03 | Gp4 | g.chr10:30318596C>T  | Missense Mutation | KIAA1462 | p.E161K  | KIAA1462                 | 44 (0.00) | 36 (0.47)  | 1.26 |
| 11-03 | Gp4 | g.chr1:200558355G>A  | Missense Mutation | KIF14    | p.A1035V | kinesin family member    | 18 (0.00) | 22 (0.36)  | 0.97 |
| 11-03 | Gp4 | g.chr6:168439337C>T  | Missense Mutation | KIF25    | p.A141V  | kinesin family member    | 36 (0.00) | 42 (0.29)  | 0.76 |
| 11-03 | Gp4 | g.chr1:245766009C>T  | Missense Mutation | KIF26B   | p.A494V  | kinesin family member    | 23 (0.00) | 19 (0.53)  | 1.40 |
| 11-03 | Gp4 | g.chr17:51901474T>A  | Nonsense Mutation | KIF2B    | p.Y360*  | kinesin family member    | 41 (0.00) | 21 (0.24)  | 0.63 |
| 11-03 | Gp4 | g.chrX:69561755G>A   | Missense Mutation | KIF4A    | p.A414T  | kinesin family member    | 20 (0.00) | 16 (0.69)  | 1.15 |
| 11-03 | Gp4 | g.chr5:154394220C>T  | Silent            | KIF4B    | p.L267L  | kinesin family member    | 77 (0.00) | 76 (0.47)  | 1.26 |
| 11-03 | Gp4 | g.chr12:57972050G>A  | Silent            | KIF5A    | p.G821G  | kinesin family member    | 34 (0.00) | 38 (0.18)  | 0.61 |
| 11-03 | Gp4 | g.chr19:55263881A>T  | Silent            | KIR2DL3  | p.T312T  | killer cell immunoglobu  | 30 (0.00) | 30 (0.17)  | 0.44 |
| 11-03 | Gp4 | g.chr19:55341700G>C  | Missense Mutation | KIR3DL1  | p.K435N  | killer cell immunoglobu  | 42 (0.02) | 19 (0.32)  | 0.84 |
| 11-03 | Gp4 | g.chr14:104121050T>A | Missense Mutation | KLC1     | p.L50Q   | kinesin light chain 1    | 53 (0.00) | 38 (0.18)  | 0.49 |
| 11-03 | Gp4 | g.chr17:40010258C>T  | Missense Mutation | KLHL11   | p.D621N  | kelch-like family memb   | 21 (0.00) | 29 (0.17)  | 0.46 |
| 11-03 | Gp4 | g.chr1:202862438G>T  | Silent            | KLHL12   | p.V503V  | kelch-like family memb   | 17 (0.00) | 17 (0.47)  | 1.25 |
| 11-03 | Gp4 | g.chrX:117043777G>T  | Missense Mutation | KLHL13   | p.P234T  | kelch-like family memb   | 23 (0.00) | 29 (0.41)  | 0.69 |
| 11-03 | Gp4 | g.chr14:45415060G>A  | Silent            | KLHL28   | p.G38G   | kelch-like family memb   | 27 (0.00) | 32 (0.19)  | 0.50 |
| 11-03 | Gp4 | g.chr6:97587062C>A   | Silent            | KLHL32   | p.S589S  | kelch-like family memb   | 60 (0.02) | 12 (0.42)  | 1.11 |
| 11-03 | Gp4 | g.chr11:118377068C>G | Silent            | KMT2A    | p.T3487T | lysine (K)-specific meth | 45 (0.00) | 22 (0.55)  | 1.45 |
| 11-03 | Gp4 | g.chr7:151879370G>A  | Missense Mutation | KMT2C    | p.P1859S | lysine (K)-specific meth | 24 (0.00) | 52 (0.23)  | 0.62 |
| 11-03 | Gp4 | g.chr12:49420608G>T  | Silent            | KMT2D    | p.A5047A | lysine (K)-specific meth | 38 (0.03) | 40 (0.20)  | 0.67 |
| 11-03 | Gp4 | g.chr3:122215322C>T  | Missense Mutation | KPNA1    | p.E31K   | karyopherin alpha 1 (im  | 15 (0.00) | 31 (0.16)  | 0.43 |
| 11-03 | Gp4 | g.chr17:66040109C>T  | Silent            | KPNA2    | p.I362I  | karyopherin alpha 2 (R   | 98 (0.00) | 102 (0.16) | 0.42 |
| 11-03 | Gp4 | g.chr17:8272633A>T   | Nonsense Mutation | KRBA2    | p.L351*  | KRAB-A domain contai     | 47 (0.00) | 40 (0.17)  | 0.47 |

|       |     |                      |                   |           |          |                           |            |            |      |
|-------|-----|----------------------|-------------------|-----------|----------|---------------------------|------------|------------|------|
| 11-03 | Gp4 | g.chrX:46332196G>A   | Missense Mutation | KRBOX4    | p.V89I   | KRAB box domain cont      | 38 (0.00)  | 18 (0.39)  | 0.65 |
| 11-03 | Gp4 | g.chr2:88327882G>A   | Silent            | KRCC1     | p.T67T   | lysine-rich coiled-coil 1 | 16 (0.00)  | 21 (0.24)  | 0.63 |
| 11-03 | Gp4 | g.chr2:88327892G>A   | Missense Mutation | KRCC1     | p.P64L   | lysine-rich coiled-coil 1 | 17 (0.00)  | 22 (0.23)  | 0.61 |
| 11-03 | Gp4 | g.chr12:75905373G>A  | Missense Mutation | KRR1      | p.A2V    | KRR1, small subunit (S)   | 22 (0.00)  | 36 (0.14)  | 0.47 |
| 11-03 | Gp4 | g.chr17:39659935T>A  | Missense Mutation | KRT13     | p.I180F  | keratin 13                | 141 (0.00) | 38 (0.42)  | 1.12 |
| 11-03 | Gp4 | g.chr17:18365464C>T  | RNA               | KRT16P4   |          | keratin 16 pseudogene     | 476 (0.00) | 30 (0.20)  | 0.53 |
| 11-03 | Gp4 | g.chr17:39779282G>A  | Silent            | KRT17     | p.I145I  | keratin 17                | 45 (0.00)  | 56 (0.20)  | 0.52 |
| 11-03 | Gp4 | g.chr17:39034409C>G  | Missense Mutation | KRT20     | p.G376A  | keratin 20                | 31 (0.00)  | 12 (0.50)  | 1.33 |
| 11-03 | Gp4 | g.chr17:38856567G>A  | Silent            | KRT24     | p.T308T  | keratin 24                | 61 (0.02)  | 53 (0.47)  | 1.26 |
| 11-03 | Gp4 | g.chr17:38950206C>T  | Silent            | KRT28     | p.E357E  | keratin 28                | 34 (0.00)  | 27 (0.30)  | 0.79 |
| 11-03 | Gp4 | g.chr17:39122962G>T  | Missense Mutation | KRT39     | p.H49Q   | keratin 39                | 66 (0.00)  | 34 (0.32)  | 0.86 |
| 11-03 | Gp4 | g.chr12:52910902C>A  | Missense Mutation | KRT5      | p.V403F  | keratin 5                 | 74 (0.01)  | 26 (0.19)  | 0.40 |
| 11-03 | Gp4 | g.chr12:52946483G>A  | Missense Mutation | KRT71     | p.R127C  | keratin 71                | 59 (0.00)  | 22 (0.32)  | 0.66 |
| 11-03 | Gp4 | g.chr17:39197146G>A  | Silent            | KRTAP1-1  | p.C168C  | keratin associated protei | 38 (0.00)  | 30 (0.17)  | 0.44 |
| 11-03 | Gp4 | g.chr17:39197191G>A  | Silent            | KRTAP1-1  | p.C153C  | keratin associated protei | 47 (0.00)  | 32 (0.22)  | 0.58 |
| 11-03 | Gp4 | g.chr17:25937112C>T  | Silent            | KSR1      | p.L634L  | kinase suppressor of ras  | 41 (0.00)  | 29 (0.41)  | 1.10 |
| 11-03 | Gp4 | g.chr18:6997824C>A   | Missense Mutation | LAMA1     | p.V1575F | laminin, alpha 1          | 32 (0.00)  | 43 (0.28)  | 0.74 |
| 11-03 | Gp4 | g.chr6:129621993C>T  | Silent            | LAMA2     | p.G1050G | laminin, alpha 2          | 34 (0.00)  | 11 (0.64)  | 0.67 |
| 11-03 | Gp4 | g.chr7:107603439G>A  | Nonsense Mutation | LAMB1     | p.R590*  | laminin, beta 1           | 22 (0.00)  | 19 (0.53)  | 1.40 |
| 11-03 | Gp4 | g.chr1:183201346C>T  | Nonsense Mutation | LAMC2     | p.Q628*  | laminin, gamma 2          | 29 (0.00)  | 34 (0.21)  | 0.55 |
| 11-03 | Gp4 | g.chr5:145543979G>T  | Missense Mutation | LARS      | p.S163Y  | leucyl-tRNA synthetase    | 31 (0.00)  | 17 (0.41)  | 1.10 |
| 11-03 | Gp4 | g.chr1:225591089C>T  | Silent            | LBR       | p.E588E  | lamin B receptor          | 18 (0.06)  | 36 (0.17)  | 0.44 |
| 11-03 | Gp4 | g.chr1:225598103C>T  | Missense Mutation | LBR       | p.V402M  | lamin B receptor          | 23 (0.00)  | 15 (0.33)  | 0.89 |
| 11-03 | Gp4 | g.chr1:152538482G>A  | Missense Mutation | LCE3E     | p.S68F   | late cornified envelope   | 240 (0.00) | 12 (0.75)  | 2.00 |
| 11-03 | Gp4 | g.chr11:27401839C>A  | Missense Mutation | LGR4      | p.G317V  | leucine-rich repeat cont  | 27 (0.00)  | 28 (0.21)  | 0.57 |
| 11-03 | Gp4 | g.chr12:71978183C>A  | Missense Mutation | LGR5      | p.P798H  | leucine-rich repeat cont  | 33 (0.00)  | 13 (0.38)  | 1.29 |
| 11-03 | Gp4 | g.chr5:38506632C>T   | Missense Mutation | LIFR      | p.R365H  | leukemia inhibitory fact  | 17 (0.00)  | 31 (0.23)  | 0.60 |
| 11-03 | Gp4 | g.chr13:108861633C>T | Missense Mutation | LIG4      | p.V662I  | ligase IV, DNA, ATP-de    | 36 (0.00)  | 43 (0.21)  | 0.56 |
| 11-03 | Gp4 | g.chr19:54803554C>A  | Missense Mutation | LILRA3    | p.W90C   | leukocyte immunoglobu     | 39 (0.00)  | 42 (0.14)  | 0.38 |
| 11-03 | Gp4 | g.chr14:74567865G>T  | Silent            | LIN52     | p.G73G   | lin-52 DREAM MuvB c       | 33 (0.00)  | 37 (0.19)  | 0.50 |
| 11-03 | Gp4 | g.chr12:8519204A>G   | lincRNA           | LINC00937 |          | long intergenic non-prot  | 150 (0.00) | 109 (0.12) | 0.40 |
| 11-03 | Gp4 | g.chr9:27949752C>T   | Silent            | LINGO2    | p.G306G  | leucine rich repeat and I | 15 (0.00)  | 13 (0.46)  | 1.23 |
| 11-03 | Gp4 | g.chr13:28134013G>T  | Missense Mutation | LNX2      | p.P445Q  | ligand of numb-protein    | 33 (0.00)  | 15 (0.47)  | 1.24 |
| 11-03 | Gp4 | g.chr13:28143253G>A  | Missense Mutation | LNX2      | p.R190W  | ligand of numb-protein    | 104 (0.00) | 98 (0.20)  | 0.54 |
| 11-03 | Gp4 | g.chr6:160978583C>A  | Missense Mutation | LPA       | p.C1551F | lipoprotein, Lp(a)        | 35 (0.00)  | 35 (0.14)  | 0.38 |



|       |     |                     |                   |           |          |                           |            |           |      |
|-------|-----|---------------------|-------------------|-----------|----------|---------------------------|------------|-----------|------|
| 11-03 | Gp4 | g.chr6:161026132C>A | Missense Mutation | LPA       | p.W964L  | lipoprotein, Lp(a)        | 40 (0.03)  | 25 (0.20) | 0.53 |
| 11-03 | Gp4 | g.chr19:14288369C>A | Silent            | LPHN1     | p.P86P   | latrophilin 1             | 21 (0.00)  | 13 (0.46) | 1.23 |
| 11-03 | Gp4 | g.chr1:82447490A>G  | Splice Site       | LPHN2     |          | latrophilin 2             | 27 (0.00)  | 29 (0.55) | 0.63 |
| 11-03 | Gp4 | g.chr18:2921615G>A  | Silent            | LPIN2     | p.F786F  | lipin 2                   | 21 (0.00)  | 22 (0.27) | 0.73 |
| 11-03 | Gp4 | g.chr18:2921623C>A  | Nonsense Mutation | LPIN2     | p.E784*  | lipin 2                   | 20 (0.00)  | 22 (0.27) | 0.73 |
| 11-03 | Gp4 | g.chr9:104071551C>G | Silent            | LPPR1     | p.V148V  |                           | 43 (0.00)  | 41 (0.17) | 0.46 |
| 11-03 | Gp4 | g.chr1:111490919C>T | Missense Mutation | LRIF1     | p.A658T  | ligand dependent nuclea   | 27 (0.00)  | 14 (0.43) | 1.14 |
| 11-03 | Gp4 | g.chr1:113661958C>T | Silent            | LRIG2     | p.D928D  | leucine-rich repeats and  | 33 (0.00)  | 32 (0.16) | 0.42 |
| 11-03 | Gp4 | g.chr8:105510163G>A | Missense Mutation | LRP12     | p.P206L  | low density lipoprotein 1 | 18 (0.00)  | 21 (0.67) | 1.78 |
| 11-03 | Gp4 | g.chr2:141093354G>A | Silent            | LRP1B     | p.N3982N | low density lipoprotein 1 | 32 (0.00)  | 32 (0.22) | 0.58 |
| 11-03 | Gp4 | g.chr6:25450599G>C  | Missense Mutation | LRRC16A   | p.D168H  | leucine rich repeat conta | 94 (0.00)  | 63 (0.14) | 0.38 |
| 11-03 | Gp4 | g.chr18:7231238G>A  | Silent            | LRRC30    | p.L34L   | leucine rich repeat conta | 17 (0.00)  | 34 (0.18) | 0.47 |
| 11-03 | Gp4 | g.chr17:62859061C>T | Silent            | LRRC37A3  | p.K1043K | leucine rich repeat conta | 43 (0.00)  | 10 (0.50) | 1.33 |
| 11-03 | Gp4 | g.chr17:43585743G>T | RNA               | LRRC37A4P |          | leucine rich repeat conta | 20 (0.00)  | 29 (0.24) | 0.64 |
| 11-03 | Gp4 | g.chr17:30349439T>A | Missense Mutation | LRRC37B   | p.I343K  | leucine rich repeat conta | 31 (0.00)  | 22 (0.41) | 1.09 |
| 11-03 | Gp4 | g.chr17:28960397A>T | RNA               | LRRC37BP1 |          | leucine rich repeat conta | 43 (0.00)  | 46 (0.22) | 0.58 |
| 11-03 | Gp4 | g.chr17:45913468G>A | Splice Site       | LRRC46    | p.R151H  | leucine rich repeat conta | 20 (0.00)  | 17 (0.53) | 1.41 |
| 11-03 | Gp4 | g.chr9:130223464G>A | Missense Mutation | LRSAM1    | p.E112K  | leucine rich repeat and s | 32 (0.00)  | 29 (0.31) | 0.83 |
| 11-03 | Gp4 | g.chr3:194371930C>T | Missense Mutation | LSG1      | p.V397I  | large 60S subunit nuclea  | 18 (0.00)  | 33 (0.15) | 0.40 |
| 11-03 | Gp4 | g.chr12:96408711C>T | Missense Mutation | LTA4H     | p.D376N  | leukotriene A4 hydrolas   | 16 (0.00)  | 43 (0.12) | 0.40 |
| 11-03 | Gp4 | g.chr12:6499315C>T  | Missense Mutation | LTBR      | p.P280L  | lymphotoxin beta recept   | 42 (0.00)  | 20 (0.40) | 1.34 |
| 11-03 | Gp4 | g.chr1:235955261T>A | Missense Mutation | LYST      | p.R1427S | lysosomal trafficking re  | 33 (0.00)  | 65 (0.17) | 0.45 |
| 11-03 | Gp4 | g.chr1:9992938C>G   | Missense Mutation | LZIC      | p.V119L  | leucine zipper and CTN    | 23 (0.00)  | 38 (0.16) | 0.42 |
| 11-03 | Gp4 | g.chr3:119434482C>T | Nonsense Mutation | MAATS1    | p.Q192*  | MYCBP-associated, tes     | 69 (0.00)  | 45 (0.18) | 0.47 |
| 11-03 | Gp4 | g.chr3:119466110G>A | Splice Site       | MAATS1    | p.R684H  | MYCBP-associated, tes     | 67 (0.00)  | 78 (0.17) | 0.44 |
| 11-03 | Gp4 | g.chr1:39851498C>T  | Silent            | MACF1     | p.C4752C | microtubule-actin crossl  | 43 (0.00)  | 43 (0.19) | 0.50 |
| 11-03 | Gp4 | g.chr11:47311022C>G | Missense Mutation | MADD      | p.Q932E  | MAP-kinase activating c   | 163 (0.00) | 54 (0.20) | 0.54 |
| 11-03 | Gp4 | g.chrX:141291223C>T | Missense Mutation | MAGEC2    | p.R184K  | melanoma antigen famil    | 23 (0.00)  | 12 (0.42) | 0.69 |
| 11-03 | Gp4 | g.chrX:55479424A>T  | Missense Mutation | MAGEH1    | p.E206V  | melanoma antigen famil    | 25 (0.00)  | 36 (0.42) | 0.69 |
| 11-03 | Gp4 | g.chr7:77667122G>T  | Intron            | MAGI2     |          | membrane associated gu    | 44 (0.00)  | 48 (0.19) | 0.50 |
| 11-03 | Gp4 | g.chr7:77671156G>A  | Intron            | MAGI2     |          | membrane associated gu    | 63 (0.00)  | 28 (0.54) | 1.43 |
| 11-03 | Gp4 | g.chr7:77703113G>A  | Intron            | MAGI2     |          | membrane associated gu    | 54 (0.00)  | 31 (0.16) | 0.43 |
| 11-03 | Gp4 | g.chr7:77740171C>T  | Intron            | MAGI2     |          | membrane associated gu    | 39 (0.00)  | 32 (0.16) | 0.42 |
| 11-03 | Gp4 | g.chr7:77741255G>A  | Intron            | MAGI2     |          | membrane associated gu    | 53 (0.00)  | 31 (0.23) | 0.60 |
| 11-03 | Gp4 | g.chr7:77753663G>A  | Intron            | MAGI2     |          | membrane associated gu    | 27 (0.00)  | 38 (0.47) | 1.26 |

|       |     |                    |        |       |                     |               |            |      |
|-------|-----|--------------------|--------|-------|---------------------|---------------|------------|------|
| 11-03 | Gp4 | g.chr7:77813931G>C | Intron | MAGI2 | membrane associated | gu 39 (0.00)  | 36 (0.17)  | 0.44 |
| 11-03 | Gp4 | g.chr7:77819264G>T | Intron | MAGI2 | membrane associated | gu 131 (0.00) | 100 (0.22) | 0.59 |
| 11-03 | Gp4 | g.chr7:77851497C>G | Intron | MAGI2 | membrane associated | gu 49 (0.00)  | 31 (0.19)  | 0.52 |
| 11-03 | Gp4 | g.chr7:77925406G>A | Intron | MAGI2 | membrane associated | gu 24 (0.00)  | 32 (0.22)  | 0.58 |
| 11-03 | Gp4 | g.chr7:77983015G>T | Intron | MAGI2 | membrane associated | gu 55 (0.00)  | 69 (0.23)  | 0.62 |
| 11-03 | Gp4 | g.chr7:78045455C>T | Intron | MAGI2 | membrane associated | gu 47 (0.00)  | 38 (0.29)  | 0.77 |
| 11-03 | Gp4 | g.chr7:78064944G>C | Intron | MAGI2 | membrane associated | gu 44 (0.00)  | 32 (0.22)  | 0.58 |
| 11-03 | Gp4 | g.chr7:78064985C>T | Intron | MAGI2 | membrane associated | gu 80 (0.00)  | 54 (0.19)  | 0.49 |
| 11-03 | Gp4 | g.chr7:78074418C>G | Intron | MAGI2 | membrane associated | gu 34 (0.00)  | 35 (0.14)  | 0.38 |
| 11-03 | Gp4 | g.chr7:78078546G>A | Intron | MAGI2 | membrane associated | gu 30 (0.00)  | 54 (0.15)  | 0.40 |
| 11-03 | Gp4 | g.chr7:78102856C>T | Intron | MAGI2 | membrane associated | gu 54 (0.00)  | 39 (0.21)  | 0.55 |
| 11-03 | Gp4 | g.chr7:78103170G>T | Intron | MAGI2 | membrane associated | gu 43 (0.00)  | 29 (0.34)  | 0.92 |
| 11-03 | Gp4 | g.chr7:78114109C>T | Intron | MAGI2 | membrane associated | gu 63 (0.00)  | 56 (0.23)  | 0.62 |
| 11-03 | Gp4 | g.chr7:78132234T>A | Intron | MAGI2 | membrane associated | gu 29 (0.00)  | 46 (0.20)  | 0.52 |
| 11-03 | Gp4 | g.chr7:78144121C>T | Intron | MAGI2 | membrane associated | gu 32 (0.00)  | 18 (0.39)  | 1.04 |
| 11-03 | Gp4 | g.chr7:78165814C>T | Intron | MAGI2 | membrane associated | gu 47 (0.00)  | 44 (0.32)  | 0.85 |
| 11-03 | Gp4 | g.chr7:78179610C>A | Intron | MAGI2 | membrane associated | gu 36 (0.00)  | 37 (0.46)  | 1.23 |
| 11-03 | Gp4 | g.chr7:78186715C>T | Intron | MAGI2 | membrane associated | gu 51 (0.00)  | 47 (0.17)  | 0.45 |
| 11-03 | Gp4 | g.chr7:78190810C>G | Intron | MAGI2 | membrane associated | gu 45 (0.00)  | 32 (0.16)  | 0.42 |
| 11-03 | Gp4 | g.chr7:78218251G>A | Intron | MAGI2 | membrane associated | gu 63 (0.00)  | 30 (0.17)  | 0.44 |
| 11-03 | Gp4 | g.chr7:78236980G>A | Intron | MAGI2 | membrane associated | gu 39 (0.00)  | 42 (0.19)  | 0.51 |
| 11-03 | Gp4 | g.chr7:78343381G>A | Intron | MAGI2 | membrane associated | gu 49 (0.00)  | 24 (0.42)  | 1.11 |
| 11-03 | Gp4 | g.chr7:78369553C>G | Intron | MAGI2 | membrane associated | gu 89 (0.00)  | 34 (0.18)  | 0.47 |
| 11-03 | Gp4 | g.chr7:78393881G>A | Intron | MAGI2 | membrane associated | gu 83 (0.00)  | 39 (0.21)  | 0.55 |
| 11-03 | Gp4 | g.chr7:78398923C>T | Intron | MAGI2 | membrane associated | gu 60 (0.00)  | 44 (0.36)  | 0.97 |
| 11-03 | Gp4 | g.chr7:78407288C>A | Intron | MAGI2 | membrane associated | gu 39 (0.00)  | 21 (0.24)  | 0.63 |
| 11-03 | Gp4 | g.chr7:78478900G>A | Intron | MAGI2 | membrane associated | gu 31 (0.00)  | 26 (0.19)  | 0.51 |
| 11-03 | Gp4 | g.chr7:78582319C>G | Intron | MAGI2 | membrane associated | gu 40 (0.00)  | 29 (0.31)  | 0.83 |
| 11-03 | Gp4 | g.chr7:78626260C>G | Intron | MAGI2 | membrane associated | gu 16 (0.06)  | 29 (0.24)  | 0.64 |
| 11-03 | Gp4 | g.chr7:78665920C>A | Intron | MAGI2 | membrane associated | gu 53 (0.00)  | 40 (0.25)  | 0.67 |
| 11-03 | Gp4 | g.chr7:78665921C>A | Intron | MAGI2 | membrane associated | gu 52 (0.00)  | 40 (0.23)  | 0.60 |
| 11-03 | Gp4 | g.chr7:78675517C>A | Intron | MAGI2 | membrane associated | gu 62 (0.02)  | 43 (0.28)  | 0.74 |
| 11-03 | Gp4 | g.chr7:78710213C>T | Intron | MAGI2 | membrane associated | gu 35 (0.00)  | 34 (0.29)  | 0.78 |
| 11-03 | Gp4 | g.chr7:78710285C>T | Intron | MAGI2 | membrane associated | gu 31 (0.00)  | 46 (0.30)  | 0.81 |
| 11-03 | Gp4 | g.chr7:78776903G>A | Intron | MAGI2 | membrane associated | gu 31 (0.00)  | 19 (0.37)  | 0.98 |

|       |     |                      |                   |          |          |                          |            |            |      |
|-------|-----|----------------------|-------------------|----------|----------|--------------------------|------------|------------|------|
| 11-03 | Gp4 | g.chr7:78830274C>T   | Intron            | MAGI2    |          | membrane associated gu   | 44 (0.00)  | 66 (0.15)  | 0.40 |
| 11-03 | Gp4 | g.chr7:78841215G>T   | Intron            | MAGI2    |          | membrane associated gu   | 18 (0.00)  | 45 (0.16)  | 0.41 |
| 11-03 | Gp4 | g.chr7:78926104G>C   | Intron            | MAGI2    |          | membrane associated gu   | 28 (0.00)  | 21 (0.29)  | 0.76 |
| 11-03 | Gp4 | g.chr7:78970147G>C   | Intron            | MAGI2    |          | membrane associated gu   | 17 (0.00)  | 12 (0.58)  | 1.56 |
| 11-03 | Gp4 | g.chr7:78990748G>A   | Intron            | MAGI2    |          | membrane associated gu   | 16 (0.00)  | 19 (0.42)  | 1.12 |
| 11-03 | Gp4 | g.chr7:79061725G>T   | Intron            | MAGI2    |          | membrane associated gu   | 50 (0.00)  | 28 (0.25)  | 0.67 |
| 11-03 | Gp4 | g.chr1:114201841C>A  | Silent            | MAGI3    | p.I923I  | membrane associated gu   | 22 (0.00)  | 19 (0.26)  | 0.70 |
| 11-03 | Gp4 | g.chr11:95825545C>G  | Missense Mutation | MAML2    | p.E550D  | mastermind-like 2 (Dros  | 28 (0.00)  | 15 (0.40)  | 1.07 |
| 11-03 | Gp4 | g.chr9:140001164C>A  | Missense Mutation | MAN1B1   | p.A490D  | mannosidase, alpha, cla  | 16 (0.00)  | 32 (0.16)  | 0.42 |
| 11-03 | Gp4 | g.chr4:103611826T>A  | Missense Mutation | MANBA    | p.Q259L  | mannosidase, beta A, ly  | 36 (0.00)  | 22 (0.23)  | 0.61 |
| 11-03 | Gp4 | g.chr1:232943729C>A  | Nonsense Mutation | MAP10    | p.S987*  | microtubule-associated j | 90 (0.00)  | 88 (0.19)  | 0.52 |
| 11-03 | Gp4 | g.chr5:71496192C>T   | Missense Mutation | MAP1B    | p.A2337V | microtubule-associated j | 104 (0.00) | 38 (0.24)  | 0.63 |
| 11-03 | Gp4 | g.chr3:185161358G>A  | Missense Mutation | MAP3K13  | p.G262E  | mitogen-activated protei | 43 (0.02)  | 62 (0.37)  | 0.99 |
| 11-03 | Gp4 | g.chr17:61767671G>A  | Missense Mutation | MAP3K3   | p.G367S  | mitogen-activated protei | 21 (0.00)  | 31 (0.16)  | 0.43 |
| 11-03 | Gp4 | g.chr6:136944047C>G  | Missense Mutation | MAP3K5   | p.G697R  | mitogen-activated protei | 15 (0.00)  | 48 (0.31)  | 0.83 |
| 11-03 | Gp4 | g.chr3:47957578G>A   | Missense Mutation | MAP4     | p.S597L  | microtubule-associated j | 15 (0.00)  | 12 (0.42)  | 1.11 |
| 11-03 | Gp4 | g.chr6:36068028G>A   | Missense Mutation | MAPK14   | p.R249K  | mitogen-activated protei | 70 (0.00)  | 63 (0.17)  | 0.47 |
| 11-03 | Gp4 | g.chr12:112305462G>T | Missense Mutation | MAPKAPK5 | p.E91D   | mitogen-activated protei | 45 (0.00)  | 36 (0.25)  | 0.87 |
| 11-03 | Gp4 | g.chr20:31421524G>C  | Splice Site       | MAPRE1   | p.G41G   | microtubule-associated j | 32 (0.00)  | 32 (0.16)  | 0.42 |
| 11-03 | Gp4 | g.chr18:32706979G>A  | Silent            | MAPRE2   | p.R183R  | microtubule-associated j | 61 (0.02)  | 32 (0.56)  | 1.50 |
| 11-03 | Gp4 | g.chr1:220928360C>T  | Missense Mutation | MARC2    | p.S115F  | mitochondrial amidoxin   | 26 (0.00)  | 16 (0.50)  | 1.33 |
| 11-03 | Gp4 | g.chr5:16067590G>A   | Missense Mutation | MARCH11  | p.T400I  | membrane-associated ri   | 39 (0.00)  | 23 (0.39)  | 1.04 |
| 11-03 | Gp4 | g.chr2:160605269C>T  | Missense Mutation | MARCH7   | p.P452S  | membrane-associated ri   | 69 (0.00)  | 16 (0.44)  | 0.51 |
| 11-03 | Gp4 | g.chr1:11087348C>A   | Missense Mutation | MASP2    | p.C552F  | mannan-binding lectin s  | 28 (0.00)  | 41 (0.15)  | 0.39 |
| 11-03 | Gp4 | g.chr1:11087438C>T   | Missense Mutation | MASP2    | p.G522D  | mannan-binding lectin s  | 34 (0.00)  | 29 (0.41)  | 1.10 |
| 11-03 | Gp4 | g.chr8:99042837G>C   | Missense Mutation | MATN2    | p.C835S  | matrilin 2               | 66 (0.00)  | 112 (0.16) | 0.43 |
| 11-03 | Gp4 | g.chr2:20200220C>T   | Missense Mutation | MATN3    | p.D384N  | matrilin 3               | 66 (0.00)  | 49 (0.31)  | 0.82 |
| 11-03 | Gp4 | g.chr2:149227554C>T  | Missense Mutation | MBD5     | p.P681L  | methyl-CpG binding do    | 70 (0.00)  | 28 (0.29)  | 0.76 |
| 11-03 | Gp4 | g.chr12:57918765G>A  | Silent            | MBD6     | p.V82V   | methyl-CpG binding do    | 52 (0.00)  | 40 (0.12)  | 0.42 |
| 11-03 | Gp4 | g.chr12:57918787G>T  | Missense Mutation | MBD6     | p.G90W   | methyl-CpG binding do    | 53 (0.00)  | 39 (0.13)  | 0.43 |
| 11-03 | Gp4 | g.chrX:131520821G>A  | Silent            | MBNL3    | p.L264L  | muscleblind-like splicin | 26 (0.00)  | 20 (0.40)  | 0.67 |
| 11-03 | Gp4 | g.chr8:48883102G>A   | Missense Mutation | MCM4     | p.R489K  | minichromosome maint     | 51 (0.00)  | 35 (0.17)  | 0.46 |
| 11-03 | Gp4 | g.chr15:94943178C>T  | Missense Mutation | MCTP2    | p.P640L  | multiple C2 domains, tr  | 37 (0.00)  | 85 (0.16)  | 0.44 |
| 11-03 | Gp4 | g.chr14:24683730G>A  | Silent            | MDP1     | p.I95I   | magnesium-dependent p    | 24 (0.00)  | 17 (0.35)  | 0.94 |
| 11-03 | Gp4 | g.chr12:116445361G>A | Missense Mutation | MED13L   | p.P698L  | mediator complex subur   | 30 (0.00)  | 45 (0.13)  | 0.46 |

|       |     |                      |                   |           |          |                                     |           |      |
|-------|-----|----------------------|-------------------|-----------|----------|-------------------------------------|-----------|------|
| 11-03 | Gp4 | g.chr12:116445363G>A | Silent            | MED13L    | p.D697D  | mediator complex subur 30 (0.00)    | 45 (0.22) | 0.77 |
| 11-03 | Gp4 | g.chr17:38182513G>A  | Silent            | MED24     | p.H627H  | mediator complex subur 34 (0.00)    | 20 (0.65) | 1.73 |
| 11-03 | Gp4 | g.chr15:66191122G>C  | Missense Mutation | MEGF11    | p.S973C  | multiple EGF-like-domæ 131 (0.00)   | 61 (0.16) | 0.44 |
| 11-03 | Gp4 | g.chr16:1911985C>T   | Splice Site       | MEIOB     |          | meiosis specific with OI48 (0.00)   | 23 (0.35) | 0.93 |
| 11-03 | Gp4 | g.chr15:81271781G>A  | Missense Mutation | MESDC2    | p.R162C  | mesoderm development 25 (0.00)      | 28 (0.29) | 0.76 |
| 11-03 | Gp4 | g.chr1:171756952C>T  | Silent            | METT13    | p.D397D  | methyltransferase like 1 28 (0.00)  | 18 (0.39) | 1.04 |
| 11-03 | Gp4 | g.chr1:171761295G>A  | Missense Mutation | METT13    | p.G538D  | methyltransferase like 1 43 (0.00)  | 48 (0.44) | 1.17 |
| 11-03 | Gp4 | g.chr12:53646949C>T  | Silent            | MFSD5     | p.L110L  | major facilitator superfa 56 (0.00) | 18 (0.28) | 0.57 |
| 11-03 | Gp4 | g.chr15:42040917T>C  | Silent            | MGA       | p.I1765I | MGA, MAX dimerizatiç 48 (0.00)      | 58 (0.16) | 0.41 |
| 11-03 | Gp4 | g.chr7:141750635C>T  | Missense Mutation | MGAM      | p.P926S  | maltase-glucoamylase (ç 56 (0.00)   | 66 (0.26) | 0.69 |
| 11-03 | Gp4 | g.chr7:141755520C>A  | Silent            | MGAM      | p.P1159P | maltase-glucoamylase (ç 15 (0.00)   | 25 (0.24) | 0.64 |
| 11-03 | Gp4 | g.chr7:141756674G>T  | Missense Mutation | MGAM      | p.G1209W | maltase-glucoamylase (ç 40 (0.00)   | 35 (0.17) | 0.46 |
| 11-03 | Gp4 | g.chr7:141780662C>A  | Silent            | MGAM      | p.T1973T | maltase-glucoamylase (ç 51 (0.00)   | 17 (0.29) | 0.78 |
| 11-03 | Gp4 | g.chr16:4700395G>A   | Missense Mutation | MGRN1     | p.G40R   | mahogunin ring finger 1 27 (0.00)   | 17 (0.35) | 0.94 |
| 11-03 | Gp4 | g.chr11:12341246C>G  | Missense Mutation | MICALCL   | p.S477C  | MICAL C-terminal like 27 (0.00)     | 48 (0.42) | 1.11 |
| 11-03 | Gp4 | g.chr22:39909575C>T  | Silent            | MIEF1     | p.N213N  | mitochondrial elongatio: 31 (0.00)  | 23 (0.39) | 1.04 |
| 11-03 | Gp4 | g.chr13:92003598G>A  | RNA               | MIR17HG   |          | miR-17-92 cluster host ç 40 (0.00)  | 33 (0.52) | 1.37 |
| 11-03 | Gp4 | g.chr10:129904768C>A | Missense Mutation | MKI67     | p.G1779V | marker of proliferation I28 (0.00)  | 15 (0.53) | 1.42 |
| 11-03 | Gp4 | g.chr10:129910215C>A | Missense Mutation | MKI67     | p.R688S  | marker of proliferation I23 (0.00)  | 27 (0.33) | 0.89 |
| 11-03 | Gp4 | g.chr6:168276023C>G  | Missense Mutation | MLLT4     | p.S196C  | myeloid/lymphoid or mi56 (0.02)     | 90 (0.16) | 0.41 |
| 11-03 | Gp4 | g.chr6:168276026G>A  | Missense Mutation | MLLT4     | p.R197Q  | myeloid/lymphoid or mi59 (0.00)     | 88 (0.18) | 0.48 |
| 11-03 | Gp4 | g.chr16:83940674C>T  | Missense Mutation | MLYCD     | p.S204L  | malonyl-CoA decarboxy58 (0.00)      | 44 (0.20) | 0.55 |
| 11-03 | Gp4 | g.chr3:154860045T>A  | Missense Mutation | MME       | p.S372T  | membrane metallo-endo 15 (0.00)     | 29 (0.28) | 0.74 |
| 11-03 | Gp4 | g.chr11:102665970A>G | Silent            | MMP1      | p.C278C  | matrix metallopeptidase 31 (0.00)   | 23 (0.35) | 0.93 |
| 11-03 | Gp4 | g.chr11:102822774C>G | Missense Mutation | MMP13     | p.D256H  | matrix metallopeptidase 44 (0.00)   | 27 (0.19) | 0.49 |
| 11-03 | Gp4 | g.chr12:56230840C>T  | Missense Mutation | MMP19     | p.E480K  | matrix metallopeptidase 42 (0.00)   | 29 (0.17) | 0.57 |
| 11-03 | Gp4 | g.chr12:56231076C>T  | Missense Mutation | MMP19     | p.G401E  | matrix metallopeptidase 18 (0.00)   | 24 (0.29) | 0.97 |
| 11-03 | Gp4 | g.chr20:49575919G>A  | Silent            | MOCS3     | p.S180S  | molybdenum cofactor sy 18 (0.00)    | 35 (0.20) | 0.53 |
| 11-03 | Gp4 | g.chr21:37711202C>T  | Silent            | MORC3     | p.I197I  | MORC family CW-type 25 (0.00)       | 26 (0.23) | 0.62 |
| 11-03 | Gp4 | g.chr21:37732521G>A  | Silent            | MORC3     | p.L457L  | MORC family CW-type 15 (0.00)       | 22 (0.23) | 0.61 |
| 11-03 | Gp4 | g.chr1:113242393G>A  | Silent            | MOV10     | p.L890L  | Mov10 RISC complex F68 (0.00)       | 29 (0.21) | 0.55 |
| 11-03 | Gp4 | g.chr2:71375221C>T   | Silent            | MPHOSPH10 | p.A550A  | M-phase phosphoproteii 15 (0.00)    | 16 (0.31) | 0.83 |
| 11-03 | Gp4 | g.chr12:123703013C>A | Missense Mutation | MPHOSPH9  | p.K302N  | M-phase phosphoproteii 32 (0.00)    | 37 (0.16) | 0.57 |
| 11-03 | Gp4 | g.chr7:40172837G>C   | Missense Mutation | MPLKIP    | p.P121A  | M-phase specific PLK1 55 (0.00)     | 57 (0.25) | 0.65 |
| 11-03 | Gp4 | g.chr2:234713179G>C  | Missense Mutation | MROH2A    | p.D644H  | maestro heat-like repeat 24 (0.00)  | 19 (0.42) | 1.12 |

|       |     |                     |                   |        |           |                                      |            |      |
|-------|-----|---------------------|-------------------|--------|-----------|--------------------------------------|------------|------|
| 11-03 | Gp4 | g.chr1:55144951C>A  | Missense Mutation | MROH7  | p.L689M   | maestro heat-like repeat 43 (0.00)   | 21 (0.24)  | 0.63 |
| 11-03 | Gp4 | g.chr6:43025901G>A  | Missense Mutation | MRPL2  | p.S56F    | mitochondrial ribosoma 47 (0.00)     | 38 (0.18)  | 0.49 |
| 11-03 | Gp4 | g.chr10:75011548G>A | Missense Mutation | MRPS16 | p.L83F    | mitochondrial ribosoma 67 (0.00)     | 64 (0.78)  | 2.08 |
| 11-03 | Gp4 | g.chr2:95780930C>T  | Missense Mutation | MRPS5  | p.G53E    | mitochondrial ribosoma 36 (0.00)     | 20 (0.50)  | 1.33 |
| 11-03 | Gp4 | g.chr11:60541320G>T | Missense Mutation | MS4A15 | p.R170M   | membrane-spanning 4-d26 (0.00)       | 11 (0.45)  | 1.21 |
| 11-03 | Gp4 | g.chr2:48016871C>T  | Intron            | MSH6   |           | mutS homolog 6 33 (0.00)             | 50 (0.18)  | 0.48 |
| 11-03 | Gp4 | g.chr2:48024065C>G  | Intron            | MSH6   |           | mutS homolog 6 21 (0.00)             | 26 (0.31)  | 0.82 |
| 11-03 | Gp4 | g.chr11:62362058G>A | Missense Mutation | MTA2   | p.P368L   | metastasis associated 1 126 (0.00)   | 33 (0.36)  | 0.97 |
| 11-03 | Gp4 | g.chr8:98735246G>T  | Missense Mutation | MTDH   | p.S498I   | metadherin 43 (0.00)                 | 42 (0.36)  | 0.95 |
| 11-03 | Gp4 | g.chr13:28014300C>T | Missense Mutation | MTIF3  | p.D96N    | mitochondrial translation 61 (0.00)  | 62 (0.48)  | 1.29 |
| 11-03 | Gp4 | g.chr1:11205075C>G  | Missense Mutation | MTOR   | p.D1572H  | mechanistic target of rap 51 (0.00)  | 12 (0.50)  | 1.33 |
| 11-03 | Gp4 | g.chr4:100515939G>T | Nonsense Mutation | MTTP   | p.G297*   | microsomal triglyceride 38 (0.00)    | 25 (0.32)  | 0.85 |
| 11-03 | Gp4 | g.chr7:100637210C>G | Missense Mutation | MUC12  | p.S1265R  | mucin 12, cell surface a: 120 (0.00) | 111 (0.16) | 0.43 |
| 11-03 | Gp4 | g.chr19:8968941G>A  | Nonsense Mutation | MUC16  | p.Q14359* | mucin 16, cell surface a: 43 (0.00)  | 34 (0.15)  | 0.39 |
| 11-03 | Gp4 | g.chr19:8999488C>T  | Missense Mutation | MUC16  | p.D13563N | mucin 16, cell surface a: 60 (0.00)  | 26 (0.42)  | 1.13 |
| 11-03 | Gp4 | g.chr19:9048557G>T  | Missense Mutation | MUC16  | p.A11025E | mucin 16, cell surface a: 59 (0.00)  | 89 (0.16)  | 0.42 |
| 11-03 | Gp4 | g.chr19:9060915C>T  | Missense Mutation | MUC16  | p.R8844H  | mucin 16, cell surface a: 55 (0.02)  | 70 (0.21)  | 0.57 |
| 11-03 | Gp4 | g.chr19:9062469C>G  | Missense Mutation | MUC16  | p.S8326T  | mucin 16, cell surface a: 30 (0.03)  | 59 (0.17)  | 0.45 |
| 11-03 | Gp4 | g.chr19:9071793G>A  | Missense Mutation | MUC16  | p.T5218I  | mucin 16, cell surface a: 16 (0.00)  | 63 (0.21)  | 0.55 |
| 11-03 | Gp4 | g.chr19:9073874G>A  | Silent            | MUC16  | p.A4524A  | mucin 16, cell surface a: 94 (0.01)  | 56 (0.14)  | 0.38 |
| 11-03 | Gp4 | g.chr19:9076935G>A  | Missense Mutation | MUC16  | p.A3504V  | mucin 16, cell surface a: 97 (0.00)  | 46 (0.15)  | 0.41 |
| 11-03 | Gp4 | g.chr19:9077054C>G  | Silent            | MUC16  | p.L3464L  | mucin 16, cell surface a: 57 (0.00)  | 39 (0.15)  | 0.41 |
| 11-03 | Gp4 | g.chr19:9087611C>A  | Missense Mutation | MUC16  | p.A1402S  | mucin 16, cell surface a: 58 (0.00)  | 45 (0.18)  | 0.47 |
| 11-03 | Gp4 | g.chr7:100677939C>A | Nonsense Mutation | MUC17  | p.S1081*  | mucin 17, cell surface a: 204 (0.00) | 217 (0.17) | 0.44 |
| 11-03 | Gp4 | g.chr7:100685680C>T | Silent            | MUC17  | p.D3661D  | mucin 17, cell surface a: 62 (0.00)  | 48 (0.19)  | 0.50 |
| 11-03 | Gp4 | g.chr11:1266068C>T  | Missense Mutation | MUC5B  | p.P2653L  | mucin 5B, oligomeric m37 (0.00)      | 21 (0.38)  | 1.02 |
| 11-03 | Gp4 | g.chrX:105449868G>T | Missense Mutation | MUM1L1 | p.R148M   | melanoma associated an26 (0.00)      | 18 (0.39)  | 0.65 |
| 11-03 | Gp4 | g.chr17:74673678C>A | Missense Mutation | MXRA7  | p.D203Y   | matrix-remodelling asso27 (0.00)     | 27 (0.26)  | 0.69 |
| 11-03 | Gp4 | g.chr6:135511455G>T | Missense Mutation | MYB    | p.W166L   | v-myb avian myeloblast 25 (0.00)     | 32 (0.31)  | 0.83 |
| 11-03 | Gp4 | g.chr6:135518283C>T | Missense Mutation | MYB    | p.P463L   | v-myb avian myeloblast 61 (0.00)     | 45 (0.24)  | 0.65 |
| 11-03 | Gp4 | g.chr8:67488537G>A  | Missense Mutation | MYBL1  | p.P392L   | v-myb avian myeloblast 65 (0.02)     | 25 (0.36)  | 0.96 |
| 11-03 | Gp4 | g.chr15:48443720C>T | Missense Mutation | MYEF2  | p.R419H   | myelin expression facto1227 (0.00)   | 101 (0.21) | 0.55 |
| 11-03 | Gp4 | g.chr3:108112897G>C | Missense Mutation | MYH15  | p.A1767G  | myosin, heavy chain 15 29 (0.00)     | 33 (0.18)  | 0.48 |
| 11-03 | Gp4 | g.chr17:10363347G>T | Silent            | MYH4   | p.I446I   | myosin, heavy chain 4, s37 (0.00)    | 75 (0.19)  | 0.50 |
| 11-03 | Gp4 | g.chr12:56553426C>A | Nonsense Mutation | MYL6   | p.Y29*    | myosin, light chain 6, al 16 (0.00)  | 16 (0.62)  | 2.08 |

|       |     |                      |                   |          |          |                           |           |            |      |
|-------|-----|----------------------|-------------------|----------|----------|---------------------------|-----------|------------|------|
| 11-03 | Gp4 | g.chr5:16683995G>A   | Missense Mutation | MYO10    | p.P1347L | myosin X                  | 26 (0.00) | 37 (0.16)  | 0.43 |
| 11-03 | Gp4 | g.chr13:109707912G>T | Missense Mutation | MYO16    | p.V1080F | myosin XVI                | 62 (0.00) | 70 (0.16)  | 0.42 |
| 11-03 | Gp4 | g.chr22:26239732C>A  | Missense Mutation | MYO18B   | p.P1081H | myosin XVIIIIB            | 40 (0.00) | 40 (0.20)  | 0.53 |
| 11-03 | Gp4 | g.chr12:57437128C>G  | Missense Mutation | MYO1A    | p.G303R  | myosin IA                 | 26 (0.00) | 25 (0.20)  | 0.66 |
| 11-03 | Gp4 | g.chr12:109870767G>A | Missense Mutation | MYO1H    | p.R656Q  | myosin IH                 | 24 (0.00) | 52 (0.13)  | 0.47 |
| 11-03 | Gp4 | g.chr10:95123745C>T  | Silent            | MYOF     | p.K947K  | myoferlin                 | 30 (0.00) | 26 (0.27)  | 0.72 |
| 11-03 | Gp4 | g.chr10:95147624G>C  | Missense Mutation | MYOF     | p.T543S  | myoferlin                 | 31 (0.00) | 13 (0.54)  | 1.44 |
| 11-03 | Gp4 | g.chr13:21331637C>T  | Missense Mutation | N6AMT2   | p.G34D   | N-6 adenine-specific D    | 39 (0.00) | 11 (0.45)  | 1.21 |
| 11-03 | Gp4 | g.chr3:174951955C>A  | Silent            | NAALADL2 | p.L260L  | N-acetylated alpha-link   | 46 (0.00) | 42 (0.26)  | 0.70 |
| 11-03 | Gp4 | g.chr3:174951975C>A  | Missense Mutation | NAALADL2 | p.S267Y  | N-acetylated alpha-link   | 39 (0.00) | 39 (0.44)  | 1.16 |
| 11-03 | Gp4 | g.chr3:175184951T>A  | Silent            | NAALADL2 | p.I504I  | N-acetylated alpha-link   | 25 (0.00) | 25 (0.20)  | 0.53 |
| 11-03 | Gp4 | g.chr17:59668264C>A  | Missense Mutation | NACA2    | p.R93I   | nascent polypeptide-ass   | 25 (0.04) | 45 (0.31)  | 0.83 |
| 11-03 | Gp4 | g.chr7:105913051G>T  | Silent            | NAMPT    | p.V124V  | nicotinamide phosphoril   | 18 (0.00) | 15 (0.33)  | 0.89 |
| 11-03 | Gp4 | g.chr10:36811959G>A  | Missense Mutation | NAMPTL   | p.P50S   | nicotinamide phosphoril   | 71 (0.00) | 34 (0.44)  | 1.18 |
| 11-03 | Gp4 | g.chr1:201777941A>T  | Silent            | NAV1     | p.P1336P | neuron navigator 1        | 69 (0.00) | 26 (0.27)  | 0.72 |
| 11-03 | Gp4 | g.chr2:204003398G>A  | Missense Mutation | NBEAL1   | p.S1563N | neurobeachin-like 1       | 15 (0.00) | 23 (0.26)  | 0.70 |
| 11-03 | Gp4 | g.chr1:16890558C>T   | Silent            | NBPF1    | p.V1100V | neuroblastoma breakpoi    | 26 (0.00) | 42 (0.43)  | 1.14 |
| 11-03 | Gp4 | g.chr12:54925308C>T  | Nonsense Mutation | NCKAP1L  | p.Q880*  | NCK-associated protein    | 54 (0.00) | 77 (0.12)  | 0.39 |
| 11-03 | Gp4 | g.chr8:71039189G>A   | Nonsense Mutation | NCOA2    | p.Q1259* | nuclear receptor coactiv  | 23 (0.00) | 41 (0.17)  | 0.46 |
| 11-03 | Gp4 | g.chr1:54238006G>T   | Missense Mutation | NDC1     | p.L653M  | NDC1 transmembrane n      | 43 (0.00) | 31 (0.16)  | 0.43 |
| 11-03 | Gp4 | g.chr3:49060174C>T   | Missense Mutation | NDUFAF3  | p.L104F  | NADH dehydrogenase (      | 32 (0.00) | 25 (0.40)  | 1.07 |
| 11-03 | Gp4 | g.chr2:207008801C>T  | Missense Mutation | NDUFS1   | p.E310K  | NADH dehydrogenase (      | 86 (0.00) | 101 (0.15) | 0.40 |
| 11-03 | Gp4 | g.chr2:152342296G>A  | Missense Mutation | NEB      | p.A8519V | nebulin                   | 70 (0.00) | 136 (0.15) | 0.41 |
| 11-03 | Gp4 | g.chr2:152370208C>T  | Splice Site       | NEB      |          | nebulin                   | 35 (0.00) | 30 (0.17)  | 0.44 |
| 11-03 | Gp4 | g.chr2:152460276T>A  | Missense Mutation | NEB      | p.K4357M | nebulin                   | 34 (0.00) | 28 (0.32)  | 0.86 |
| 11-03 | Gp4 | g.chr2:152521038C>T  | Missense Mutation | NEB      | p.A1810T | nebulin                   | 71 (0.00) | 30 (0.40)  | 1.07 |
| 11-03 | Gp4 | g.chr6:11190488C>G   | Silent            | NEDD9    | p.V538V  | neural precursor cell ex  | 31 (0.00) | 17 (0.29)  | 0.78 |
| 11-03 | Gp4 | g.chr22:29881820G>A  | Missense Mutation | NEFH     | p.E398K  | neurofilament, heavy po   | 25 (0.00) | 13 (0.46)  | 1.23 |
| 11-03 | Gp4 | g.chr14:75551363C>T  | Silent            | NEK9     | p.Q948Q  | NIMA-related kinase 9     | 26 (0.00) | 16 (0.38)  | 1.00 |
| 11-03 | Gp4 | g.chr14:50295891G>A  | Silent            | NEMF     | p.N371N  | nuclear export mediator   | 41 (0.00) | 23 (0.30)  | 0.81 |
| 11-03 | Gp4 | g.chr16:47165899G>A  | Silent            | NETO2    | p.A24A   | neuropilin (NRP) and to   | 24 (0.00) | 36 (0.19)  | 0.52 |
| 11-03 | Gp4 | g.chr11:74717424C>T  | Nonsense Mutation | NEU3     | p.Q425*  | sialidase 3 (membrane s   | 44 (0.00) | 18 (0.28)  | 0.74 |
| 11-03 | Gp4 | g.chr17:29588754C>T  | Missense Mutation | NF1      | p.P1535S | neurofibromin 1           | 27 (0.00) | 32 (0.34)  | 0.92 |
| 11-03 | Gp4 | g.chr16:69681407G>A  | Missense Mutation | NFAT5    | p.D150N  | nuclear factor of activat | 51 (0.00) | 27 (0.19)  | 0.49 |
| 11-03 | Gp4 | g.chr16:69727290C>A  | Missense Mutation | NFAT5    | p.L1094I | nuclear factor of activat | 18 (0.00) | 34 (0.15)  | 0.39 |

|       |     |                      |                   |         |          |                                       |           |      |
|-------|-----|----------------------|-------------------|---------|----------|---------------------------------------|-----------|------|
| 11-03 | Gp4 | g.chr10:104157084G>T | Missense Mutation | NFKB2   | p.V141L  | nuclear factor of kappa l26 (0.00)    | 12 (0.67) | 1.78 |
| 11-03 | Gp4 | g.chr9:33307279G>A   | Missense Mutation | NFX1    | p.C453Y  | nuclear transcription fac 17 (0.00)   | 45 (0.31) | 0.83 |
| 11-03 | Gp4 | g.chr9:33311115C>T   | Missense Mutation | NFX1    | p.P463L  | nuclear transcription fac 91 (0.00)   | 85 (0.15) | 0.41 |
| 11-03 | Gp4 | g.chr2:233839353C>A  | Missense Mutation | NGEF    | p.R83L   | neuronal guanine nuclec 57 (0.02)     | 44 (0.23) | 0.61 |
| 11-03 | Gp4 | g.chr5:156899542C>T  | Silent            | NIPAL4  | p.L325L  | NIPA-like domain contε 24 (0.00)      | 42 (0.19) | 0.51 |
| 11-03 | Gp4 | g.chr5:156899653G>T  | Silent            | NIPAL4  | p.V362V  | NIPA-like domain contε 48 (0.00)      | 54 (0.30) | 0.79 |
| 11-03 | Gp4 | g.chr1:247588641C>G  | Nonsense Mutation | NLRP3   | p.Y632*  | NLR family, pyrin domε 17 (0.00)      | 31 (0.23) | 0.60 |
| 11-03 | Gp4 | g.chr5:43655995G>A   | Missense Mutation | NNT     | p.A705T  | nicotinamide nucleotide 17 (0.00)     | 15 (0.40) | 1.07 |
| 11-03 | Gp4 | g.chr18:31538225G>A  | Missense Mutation | NOL4    | p.A120V  | nucleolar protein 4 31 (0.00)         | 13 (0.62) | 1.64 |
| 11-03 | Gp4 | g.chr9:95076914C>A   | Nonsense Mutation | NOL8    | p.E665*  | nucleolar protein 8 17 (0.00)         | 38 (0.26) | 0.70 |
| 11-03 | Gp4 | g.chr16:18549848C>A  | Splice Site       | NOMO2   | p.G407V  | NODAL modulator 2 140 (0.00)          | 46 (0.17) | 0.46 |
| 11-03 | Gp4 | g.chr16:18549930G>A  | Nonsense Mutation | NOMO2   | p.Q380*  | NODAL modulator 2 163 (0.00)          | 59 (0.19) | 0.50 |
| 11-03 | Gp4 | g.chr12:117665406G>A | Missense Mutation | NOS1    | p.P1183L | nitric oxide synthase 1 ( 17 (0.00)   | 25 (0.28) | 0.98 |
| 11-03 | Gp4 | g.chr16:29394476G>T  | Missense Mutation | NP1PB11 | p.P593T  | nuclear pore complex in 202 (0.00)    | 18 (0.28) | 0.74 |
| 11-03 | Gp4 | g.chr18:11619759C>A  | RNA               | NP1PB1P |          | nuclear pore complex in 62 (0.00)     | 34 (0.15) | 0.39 |
| 11-03 | Gp4 | g.chr9:35800142C>A   | Silent            | NPR2    | p.R371R  | natriuretic peptide recep 50 (0.02)   | 52 (0.17) | 0.46 |
| 11-03 | Gp4 | g.chr15:72104681G>T  | RNA               | NR2E3   |          | nuclear receptor subfam 72 (0.00)     | 26 (0.23) | 0.62 |
| 11-03 | Gp4 | g.chr5:142779366G>T  | Missense Mutation | NR3C1   | p.Q347K  | nuclear receptor subfam 28 (0.00)     | 27 (0.19) | 0.49 |
| 11-03 | Gp4 | g.chr14:80164003C>T  | Missense Mutation | NRXN3   | p.A843V  | neurexin 3 27 (0.00)                  | 53 (0.28) | 0.75 |
| 11-03 | Gp4 | g.chr5:176694689A>G  | Missense Mutation | NSD1    | p.E1758G | nuclear receptor binding 32 (0.00)    | 46 (0.15) | 0.41 |
| 11-03 | Gp4 | g.chr5:176721539C>T  | Silent            | NSD1    | p.D2390D | nuclear receptor binding 61 (0.00)    | 30 (0.17) | 0.44 |
| 11-03 | Gp4 | g.chr20:1445015C>T   | Silent            | NSFL1C  | p.S54S   | NSFL1 (p97) cofactor ( 38 (0.00)      | 22 (0.23) | 0.61 |
| 11-03 | Gp4 | g.chr5:6602574G>A    | Splice Site       | NSUN2   | p.A631V  | NOP2/Sun RNA methyl 26 (0.00)         | 46 (0.52) | 1.39 |
| 11-03 | Gp4 | g.chr12:104187216G>T | Missense Mutation | NT5DC3  | p.L297I  | 5'-nucleotidase domain ε 42 (0.00)    | 56 (0.12) | 0.43 |
| 11-03 | Gp4 | g.chr16:77769796C>T  | Silent            | NUDT7   | p.A87A   | nudix (nucleoside diphos 30 (0.00)    | 17 (0.29) | 0.78 |
| 11-03 | Gp4 | g.chr11:47858454T>A  | Silent            | NUP160  | p.R309R  | nucleoporin 160kDa 37 (0.00)          | 35 (0.34) | 0.91 |
| 11-03 | Gp4 | g.chr16:67902403G>T  | Splice Site       | NUTF2   |          | nuclear transport factor ε 161 (0.00) | 47 (0.15) | 0.40 |
| 11-03 | Gp4 | g.chr1:224492452C>A  | Missense Mutation | NVL     | p.D271Y  | nuclear VCP-like 62 (0.00)            | 26 (0.69) | 1.85 |
| 11-03 | Gp4 | g.chr14:24880563G>A  | Missense Mutation | NYNRIN  | p.S850N  | NYN domain and retrov 46 (0.00)       | 22 (0.36) | 0.97 |
| 11-03 | Gp4 | g.chr9:131255028C>T  | Missense Mutation | ODF2    | p.R561C  | outer dense fiber of sper 21 (0.00)   | 18 (0.28) | 0.74 |
| 11-03 | Gp4 | g.chr19:15838882C>T  | Missense Mutation | OR10H2  | p.S10F   | olfactory receptor, famil 29 (0.00)   | 47 (0.15) | 0.40 |
| 11-03 | Gp4 | g.chr19:16059893C>T  | Missense Mutation | OR10H4  | p.P26S   | olfactory receptor, famil 26 (0.00)   | 43 (0.16) | 0.43 |
| 11-03 | Gp4 | g.chr1:159410122C>T  | Missense Mutation | OR10J1  | p.R192C  | olfactory receptor, famil 45 (0.00)   | 46 (0.15) | 0.41 |
| 11-03 | Gp4 | g.chr12:56030821C>T  | Missense Mutation | OR10P1  | p.T49I   | olfactory receptor, famil 48 (0.02)   | 32 (0.38) | 1.25 |
| 11-03 | Gp4 | g.chr22:16449287A>G  | Missense Mutation | OR11H1  | p.I173T  | olfactory receptor, famil 103 (0.00)  | 37 (0.19) | 0.50 |

|       |     |                      |                   |         |         |                                    |           |      |
|-------|-----|----------------------|-------------------|---------|---------|------------------------------------|-----------|------|
| 11-03 | Gp4 | g.chr9:107289226T>C  | Missense Mutation | OR13C4  | p.K89E  | olfactory receptor, famil85 (0.01) | 32 (0.19) | 0.50 |
| 11-03 | Gp4 | g.chr1:247902145C>T  | Missense Mutation | OR14K1  | p.P77S  | olfactory receptor, famil32 (0.00) | 42 (0.31) | 0.83 |
| 11-03 | Gp4 | g.chr17:2996265C>A   | Missense Mutation | OR1D2   | p.G9V   | olfactory receptor, famil23 (0.00) | 29 (0.17) | 0.46 |
| 11-03 | Gp4 | g.chr9:125424416G>A  | Missense Mutation | OR1L1   | p.C141Y | olfactory receptor, famil35 (0.00) | 18 (0.39) | 1.04 |
| 11-03 | Gp4 | g.chr9:125486922C>G  | Silent            | OR1L4   | p.S218S | olfactory receptor, famil43 (0.00) | 55 (0.20) | 0.53 |
| 11-03 | Gp4 | g.chr11:57970964G>A  | Silent            | OR1S2   | p.S230S | olfactory receptor, famil29 (0.00) | 38 (0.18) | 0.49 |
| 11-03 | Gp4 | g.chr7:143792610G>T  | Missense Mutation | OR2A12  | p.W137L | olfactory receptor, famil63 (0.00) | 19 (0.42) | 1.12 |
| 11-03 | Gp4 | g.chr7:143747665C>A  | Silent            | OR2A5   | p.P57P  | olfactory receptor, famil19 (0.00) | 41 (0.17) | 0.46 |
| 11-03 | Gp4 | g.chr7:99473922C>T   | Silent            | OR2AE1  | p.T245T | olfactory receptor, famil28 (0.00) | 17 (0.71) | 1.88 |
| 11-03 | Gp4 | g.chr7:99474171G>A   | Silent            | OR2AE1  | p.I162I | olfactory receptor, famil35 (0.00) | 43 (0.21) | 0.56 |
| 11-03 | Gp4 | g.chr12:55968870G>T  | Silent            | OR2AP1  | p.L224L | olfactory receptor, famil32 (0.00) | 50 (0.32) | 1.06 |
| 11-03 | Gp4 | g.chr16:3406030C>T   | Silent            | OR2C1   | p.A30A  | olfactory receptor, famil53 (0.00) | 69 (0.28) | 0.73 |
| 11-03 | Gp4 | g.chr1:248263192C>A  | Missense Mutation | OR2L13  | p.A172D | olfactory receptor, famil55 (0.00) | 40 (0.17) | 0.47 |
| 11-03 | Gp4 | g.chr1:248756652C>T  | Missense Mutation | OR2T10  | p.V140I | olfactory receptor, famil34 (0.00) | 13 (0.38) | 1.03 |
| 11-03 | Gp4 | g.chr1:248616180C>T  | Missense Mutation | OR2T2   | p.L28F  | olfactory receptor, famil88 (0.00) | 38 (0.26) | 0.70 |
| 11-03 | Gp4 | g.chr11:55135573C>T  | Missense Mutation | OR4A15  | p.L72F  | olfactory receptor, famil30 (0.00) | 20 (0.60) | 1.60 |
| 11-03 | Gp4 | g.chr15:102389858G>T | RNA               | OR4F13P |         | olfactory receptor, famil20 (0.00) | 10 (0.50) | 1.33 |
| 11-03 | Gp4 | g.chr11:4968082C>T   | Silent            | OR51A4  | p.V83V  | olfactory receptor, famil21 (0.00) | 46 (0.17) | 0.46 |
| 11-03 | Gp4 | g.chr11:4388863C>T   | Missense Mutation | OR52B4  | p.M221I | olfactory receptor, famil28 (0.00) | 48 (0.19) | 0.50 |
| 11-03 | Gp4 | g.chr11:5862912G>C   | Missense Mutation | OR52E6  | p.D72E  | olfactory receptor, famil51 (0.02) | 28 (0.32) | 0.86 |
| 11-03 | Gp4 | g.chr11:5878442G>T   | Missense Mutation | OR52E8  | p.P164Q | olfactory receptor, famil68 (0.00) | 57 (0.16) | 0.42 |
| 11-03 | Gp4 | g.chr11:5968859C>T   | Missense Mutation | OR56A3  | p.P95S  | olfactory receptor, famil20 (0.00) | 48 (0.33) | 0.89 |
| 11-03 | Gp4 | g.chr14:21109599C>A  | Silent            | OR6S1   | p.L84L  | olfactory receptor, famil25 (0.00) | 25 (0.20) | 0.53 |
| 11-03 | Gp4 | g.chr7:142750140G>T  | Missense Mutation | OR6V1   | p.A235S | olfactory receptor, famil87 (0.00) | 68 (0.25) | 0.67 |
| 11-03 | Gp4 | g.chr19:9296865G>T   | Missense Mutation | OR7D2   | p.M136I | olfactory receptor, famil25 (0.00) | 30 (0.20) | 0.53 |
| 11-03 | Gp4 | g.chr19:9225520C>T   | Missense Mutation | OR7G1   | p.R307K | olfactory receptor, famil46 (0.00) | 56 (0.18) | 0.48 |
| 11-03 | Gp4 | g.chr19:9225832C>G   | Missense Mutation | OR7G1   | p.S203T | olfactory receptor, famil34 (0.00) | 33 (0.27) | 0.73 |
| 11-03 | Gp4 | g.chr19:9226308G>T   | Silent            | OR7G1   | p.L44L  | olfactory receptor, famil22 (0.00) | 26 (0.27) | 0.72 |
| 11-03 | Gp4 | g.chr11:124266452A>T | Missense Mutation | OR8B3   | p.S266T | olfactory receptor, famil41 (0.00) | 23 (0.26) | 0.70 |
| 11-03 | Gp4 | g.chr11:55905102G>A  | Silent            | OR8J3   | p.F31F  | olfactory receptor, famil24 (0.00) | 15 (0.53) | 1.42 |
| 11-03 | Gp4 | g.chr11:56085843G>C  | Missense Mutation | OR8K3   | p.A21P  | olfactory receptor, famil28 (0.00) | 23 (0.57) | 1.51 |
| 11-03 | Gp4 | g.chr11:55927758G>A  | Silent            | OR8K5   | p.F12F  | olfactory receptor, famil17 (0.00) | 21 (0.24) | 0.63 |
| 11-03 | Gp4 | g.chr12:48919472G>A  | Missense Mutation | OR8S1   | p.D20N  | olfactory receptor, famil29 (0.00) | 24 (0.21) | 0.70 |
| 11-03 | Gp4 | g.chr11:57958075C>T  | Missense Mutation | OR9Q2   | p.T38I  | olfactory receptor, famil60 (0.00) | 36 (0.19) | 0.52 |
| 11-03 | Gp4 | g.chr1:52854171G>A   | Silent            | ORC1    | p.N442N | origin recognition comp 17 (0.00)  | 18 (0.50) | 1.33 |



|       |     |                      |                   |          |          |                           |            |           |      |
|-------|-----|----------------------|-------------------|----------|----------|---------------------------|------------|-----------|------|
| 11-03 | Gp4 | g.chr12:76791602G>T  | Missense Mutation | OSBPL8   | p.Q182K  | oxysterol binding protei  | 18 (0.00)  | 46 (0.17) | 0.58 |
| 11-03 | Gp4 | g.chr8:90937611G>C   | Missense Mutation | OSGIN2   | p.A501P  | oxidative stress induced  | 80 (0.00)  | 26 (0.46) | 1.23 |
| 11-03 | Gp4 | g.chr12:80658958C>T  | Missense Mutation | OTOGL    | p.P722L  | otogelin-like             | 27 (0.00)  | 51 (0.14) | 0.46 |
| 11-03 | Gp4 | g.chr3:161221622G>C  | Missense Mutation | OTOL1    | p.W442C  | otolin 1                  | 21 (0.00)  | 26 (0.38) | 1.03 |
| 11-03 | Gp4 | g.chr4:146059680G>T  | Missense Mutation | OTUD4    | p.F749L  | OTU deubiquitinase 4      | 19 (0.00)  | 18 (0.33) | 0.89 |
| 11-03 | Gp4 | g.chr1:111965624C>G  | Missense Mutation | OVGP1    | p.R178T  | oviductal glycoprotein    | 167 (0.01) | 32 (0.59) | 1.58 |
| 11-03 | Gp4 | g.chr12:133197883G>A | Silent            | P2RX2    | p.T316T  | purinergic receptor P2X   | 29 (0.00)  | 27 (0.44) | 1.19 |
| 11-03 | Gp4 | g.chr12:121605329C>T | Silent            | P2RX7    | p.N261N  | purinergic receptor P2X   | 35 (0.00)  | 58 (0.22) | 0.79 |
| 11-03 | Gp4 | g.chr1:40037021C>T   | Splice Site       | PABPC4   | p.V130M  | poly(A) binding protein.  | 36 (0.00)  | 36 (0.19) | 0.52 |
| 11-03 | Gp4 | g.chr11:65998339C>A  | Silent            | PACS1    | p.L518L  | phosphofurin acidic clu   | 21 (0.00)  | 41 (0.17) | 0.46 |
| 11-03 | Gp4 | g.chr1:17720829G>C   | RNA               | PADI6    |          | peptidyl arginine deim    | 27 (0.00)  | 16 (0.50) | 1.33 |
| 11-03 | Gp4 | g.chr19:39879807C>T  | Missense Mutation | PAF1     | p.E165K  | Paf1, RNA polymerase      | 34 (0.00)  | 18 (0.33) | 0.89 |
| 11-03 | Gp4 | g.chr4:57307980C>A   | Silent            | PAICS    | p.I56I   | phosphoribosylaminoim     | 21 (0.00)  | 25 (0.36) | 0.96 |
| 11-03 | Gp4 | g.chrX:110439692C>A  | Missense Mutation | PAK3     | p.Q426K  | p21 protein (Cdc42/Rac    | 15 (0.00)  | 17 (0.35) | 0.59 |
| 11-03 | Gp4 | g.chr12:56726607C>T  | Missense Mutation | PAN2     | p.G91E   | PAN2 poly(A) specific     | 124 (0.00) | 42 (0.17) | 0.55 |
| 11-03 | Gp4 | g.chr13:28794471C>T  | Missense Mutation | PAN3     | p.S319F  | PAN3 poly(A) specific     | 119 (0.00) | 23 (0.30) | 0.81 |
| 11-03 | Gp4 | g.chr13:28841269C>A  | Silent            | PAN3     | p.V537V  | PAN3 poly(A) specific     | 124 (0.00) | 30 (0.17) | 0.44 |
| 11-03 | Gp4 | g.chr7:4899760G>A    | Missense Mutation | PAPOLB   | p.A560V  | poly(A) polymerase bet    | 25 (0.00)  | 24 (0.42) | 1.11 |
| 11-03 | Gp4 | g.chr9:118973965C>A  | Missense Mutation | PAPPA    | p.H558N  | pregnancy-associated pl   | 90 (0.01)  | 40 (0.17) | 0.47 |
| 11-03 | Gp4 | g.chr2:205986379C>A  | Missense Mutation | PARD3B   | p.Q291K  | par-3 family cell polarit | 37 (0.00)  | 34 (0.26) | 0.71 |
| 11-03 | Gp4 | g.chr3:122432380G>T  | Silent            | PARP14   | p.V1243V | poly (ADP-ribose) poly    | 125 (0.00) | 48 (0.21) | 0.56 |
| 11-03 | Gp4 | g.chr15:65553229G>C  | Missense Mutation | PARP16   | p.P161R  | poly (ADP-ribose) poly    | 145 (0.00) | 42 (0.17) | 0.44 |
| 11-03 | Gp4 | g.chr15:72552916G>A  | Missense Mutation | PARP6    | p.P220L  | poly (ADP-ribose) poly    | 145 (0.00) | 90 (0.18) | 0.47 |
| 11-03 | Gp4 | g.chr3:52582194C>A   | Missense Mutation | PBRM1    | p.W1615L | polybromo 1               | 71 (0.01)  | 36 (0.22) | 0.59 |
| 11-03 | Gp4 | g.chr3:52582216C>G   | Missense Mutation | PBRM1    | p.E1608Q | polybromo 1               | 65 (0.00)  | 35 (0.17) | 0.46 |
| 11-03 | Gp4 | g.chr3:52620498C>A   | Missense Mutation | PBRM1    | p.E1125D | polybromo 1               | 39 (0.00)  | 21 (0.24) | 0.63 |
| 11-03 | Gp4 | g.chr3:52682447G>C   | Nonsense Mutation | PBRM1    | p.Y242*  | polybromo 1               | 17 (0.00)  | 13 (0.38) | 1.03 |
| 11-03 | Gp4 | g.chr3:51992958G>A   | Silent            | PCBP4    | p.I257I  | poly(rC) binding protei   | 20 (0.00)  | 12 (0.42) | 1.11 |
| 11-03 | Gp4 | g.chr5:140249451G>T  | Missense Mutation | PCDHA11  | p.A255S  | protocadherin alpha 11    | 87 (0.00)  | 31 (0.29) | 0.77 |
| 11-03 | Gp4 | g.chr5:140255367A>T  | Missense Mutation | PCDHA12  | p.I104F  | protocadherin alpha 12    | 114 (0.00) | 38 (0.32) | 0.84 |
| 11-03 | Gp4 | g.chr5:140186800G>A  | Missense Mutation | PCDHA4   | p.E10K   | protocadherin alpha 4     | 23 (0.00)  | 28 (0.25) | 0.67 |
| 11-03 | Gp4 | g.chr5:140201669C>A  | Silent            | PCDHA5   | p.I103I  | protocadherin alpha 5     | 20 (0.00)  | 18 (0.39) | 1.04 |
| 11-03 | Gp4 | g.chr5:140208536C>T  | Missense Mutation | PCDHA6   | p.A287V  | protocadherin alpha 6     | 37 (0.00)  | 61 (0.15) | 0.39 |
| 11-03 | Gp4 | g.chr5:140220935G>A  | Missense Mutation | PCDHA8   | p.G10E   | protocadherin alpha 8     | 36 (0.00)  | 28 (0.18) | 0.48 |
| 11-03 | Gp4 | g.chr5:140802433G>A  | Missense Mutation | PCDHGA11 | p.V547M  | protocadherin gamma st    | 76 (0.01)  | 76 (0.17) | 0.46 |

|       |     |                     |                   |         |          |                           |            |           |      |
|-------|-----|---------------------|-------------------|---------|----------|---------------------------|------------|-----------|------|
| 11-03 | Gp4 | g.chr5:140719008C>T | Missense Mutation | PCDHGA2 | p.A157V  | protocadherin gamma st    | 87 (0.00)  | 21 (0.24) | 0.63 |
| 11-03 | Gp4 | g.chr5:140719272C>A | Missense Mutation | PCDHGA2 | p.P245H  | protocadherin gamma st    | 22 (0.00)  | 23 (0.22) | 0.58 |
| 11-03 | Gp4 | g.chr5:140724028G>T | Missense Mutation | PCDHGA3 | p.G143V  | protocadherin gamma st    | 57 (0.00)  | 12 (0.42) | 1.11 |
| 11-03 | Gp4 | g.chr5:140754674G>T | Missense Mutation | PCDHGA6 | p.D342Y  | protocadherin gamma st    | 31 (0.00)  | 37 (0.22) | 0.58 |
| 11-03 | Gp4 | g.chr5:140754748C>T | Silent            | PCDHGA6 | p.I366I  | protocadherin gamma st    | 59 (0.00)  | 53 (0.19) | 0.50 |
| 11-03 | Gp4 | g.chr5:140740003C>A | Missense Mutation | PCDHGB2 | p.L101M  | protocadherin gamma st    | 85 (0.01)  | 34 (0.15) | 0.39 |
| 11-03 | Gp4 | g.chr20:2819117G>A  | Missense Mutation | PCED1A  | p.P201L  | PC-esterase domain con    | 20 (0.00)  | 9 (0.56)  | 1.48 |
| 11-03 | Gp4 | g.chr7:82544631G>A  | Missense Mutation | PCLO    | p.T4224I | piccolo presynaptic cyto  | 67 (0.00)  | 19 (0.26) | 0.70 |
| 11-03 | Gp4 | g.chr20:5098223C>T  | Missense Mutation | PCNA    | p.V159I  | proliferating cell nuclea | 42 (0.02)  | 63 (0.21) | 0.55 |
| 11-03 | Gp4 | g.chr9:78947411G>T  | Missense Mutation | PCSK5   | p.A1518S | proprotein convertase st  | 69 (0.00)  | 49 (0.18) | 0.49 |
| 11-03 | Gp4 | g.chr9:125582793C>T | Silent            | PDCL    | p.K159K  | phosducin-like            | 104 (0.00) | 81 (0.15) | 0.40 |
| 11-03 | Gp4 | g.chr12:54967437G>A | Missense Mutation | PDE1B   | p.M295I  | phosphodiesterase 1B, c   | 44 (0.00)  | 23 (0.22) | 0.72 |
| 11-03 | Gp4 | g.chr1:144921956A>T | Missense Mutation | PDE4DIP | p.L495H  | phosphodiesterase 4D ir   | 171 (0.00) | 88 (0.18) | 0.48 |
| 11-03 | Gp4 | g.chr15:85659225G>A | Missense Mutation | PDE8A   | p.M470I  | phosphodiesterase 8A      | 102 (0.00) | 71 (0.25) | 0.68 |
| 11-03 | Gp4 | g.chr4:157693880G>C | Missense Mutation | PDGFC   | p.Q221E  | platelet derived growth   | 126 (0.00) | 34 (0.32) | 0.86 |
| 11-03 | Gp4 | g.chr7:148702387C>T | Silent            | PDIA4   | p.E456E  | protein disulfide isomer  | 29 (0.00)  | 26 (0.31) | 0.82 |
| 11-03 | Gp4 | g.chr16:15130013G>T | Nonsense Mutation | PDXDC1  | p.E750*  | pyridoxal-dependent de    | 26 (0.00)  | 12 (0.42) | 1.11 |
| 11-03 | Gp4 | g.chr15:77473366C>T | Silent            | PEAK1   | p.L301L  | pseudopodium-enriched     | 26 (0.00)  | 13 (0.46) | 1.23 |
| 11-03 | Gp4 | g.chr8:77896404C>A  | Missense Mutation | PEX2    | p.R4I    | peroxisomal biogenesis    | 46 (0.00)  | 30 (0.17) | 0.44 |
| 11-03 | Gp4 | g.chr3:179525577C>T | Missense Mutation | PEX5L   | p.G521R  | peroxisomal biogenesis    | 39 (0.00)  | 22 (0.41) | 1.09 |
| 11-03 | Gp4 | g.chr12:9086862G>T  | Splice Site       | PHC1    |          | polyhomeotic homolog      | 34 (0.00)  | 67 (0.25) | 0.85 |
| 11-03 | Gp4 | g.chr12:9091963C>T  | Missense Mutation | PHC1    | p.L975F  | polyhomeotic homolog      | 71 (0.00)  | 24 (0.29) | 0.98 |
| 11-03 | Gp4 | g.chr3:169840401C>A | Missense Mutation | PHC3    | p.L640F  | polyhomeotic homolog      | 32 (0.00)  | 16 (0.38) | 1.00 |
| 11-03 | Gp4 | g.chr18:60385153C>A | Intron            | PHLPP1  |          | PH domain and leucine     | 52 (0.00)  | 35 (0.20) | 0.53 |
| 11-03 | Gp4 | g.chr18:60412451C>T | Intron            | PHLPP1  |          | PH domain and leucine     | 41 (0.00)  | 37 (0.22) | 0.58 |
| 11-03 | Gp4 | g.chr18:60443626C>T | Intron            | PHLPP1  |          | PH domain and leucine     | 36 (0.00)  | 19 (0.32) | 0.84 |
| 11-03 | Gp4 | g.chr18:60463017C>T | Intron            | PHLPP1  |          | PH domain and leucine     | 35 (0.00)  | 33 (0.76) | 2.02 |
| 11-03 | Gp4 | g.chr18:60469438C>T | Intron            | PHLPP1  |          | PH domain and leucine     | 23 (0.00)  | 24 (0.42) | 1.11 |
| 11-03 | Gp4 | g.chr18:60481387G>A | Intron            | PHLPP1  |          | PH domain and leucine     | 29 (0.00)  | 25 (0.32) | 0.85 |
| 11-03 | Gp4 | g.chr18:60518440G>A | Intron            | PHLPP1  |          | PH domain and leucine     | 67 (0.00)  | 43 (0.28) | 0.74 |
| 11-03 | Gp4 | g.chr18:60520265G>A | Intron            | PHLPP1  |          | PH domain and leucine     | 34 (0.00)  | 42 (0.17) | 0.44 |
| 11-03 | Gp4 | g.chr18:60613020C>A | Intron            | PHLPP1  |          | PH domain and leucine     | 33 (0.00)  | 44 (0.16) | 0.42 |
| 11-03 | Gp4 | g.chr18:60613514G>A | Intron            | PHLPP1  |          | PH domain and leucine     | 17 (0.00)  | 11 (0.73) | 1.94 |
| 11-03 | Gp4 | g.chr18:60617667C>T | Intron            | PHLPP1  |          | PH domain and leucine     | 46 (0.02)  | 15 (0.80) | 2.13 |
| 11-03 | Gp4 | g.chr18:60629368C>T | Intron            | PHLPP1  |          | PH domain and leucine     | 29 (0.00)  | 40 (0.30) | 0.80 |

|       |     |                      |                   |           |          |                                  |           |           |      |
|-------|-----|----------------------|-------------------|-----------|----------|----------------------------------|-----------|-----------|------|
| 11-03 | Gp4 | g.chr16:71697882C>A  | Intron            | PHLPP2    |          | PH domain and leucine            | 21 (0.00) | 36 (0.17) | 0.44 |
| 11-03 | Gp4 | g.chr16:71741177G>A  | Intron            | PHLPP2    |          | PH domain and leucine            | 25 (0.00) | 31 (0.19) | 0.52 |
| 11-03 | Gp4 | g.chr7:77569977G>A   | Splice Site       | PHTF2     |          | putative homeodomain t22         | (0.00)    | 62 (0.16) | 0.43 |
| 11-03 | Gp4 | g.chr22:20390411G>A  | RNA               | PI4KAP1   |          | phosphatidylinositol 4-k         | 31 (0.00) | 30 (0.17) | 0.44 |
| 11-03 | Gp4 | g.chr15:68468951C>T  | Silent            | PIAS1     | p.T480T  | protein inhibitor of activ       | 35 (0.00) | 41 (0.15) | 0.39 |
| 11-03 | Gp4 | g.chr1:172411009C>T  | Missense Mutation | PIGC      | p.V252I  | phosphatidylinositol gly         | 46 (0.00) | 31 (0.19) | 0.52 |
| 11-03 | Gp4 | g.chr1:160000698G>A  | Silent            | PIGM      | p.L278L  | phosphatidylinositol gly         | 60 (0.00) | 73 (0.29) | 0.77 |
| 11-03 | Gp4 | g.chr12:18715702A>T  | Missense Mutation | PIK3C2G   | p.Q1178L | phosphatidylinositol-4- $\gamma$ | 22 (0.00) | 55 (0.22) | 0.73 |
| 11-03 | Gp4 | g.chr2:209190185A>G  | Missense Mutation | PIKFYVE   | p.M884V  | phosphoinositide kinase          | 31 (0.00) | 47 (0.40) | 1.08 |
| 11-03 | Gp4 | g.chr2:209219914G>T  | Splice Site       | PIKFYVE   | p.G2061V | phosphoinositide kinase          | 37 (0.00) | 37 (0.22) | 0.58 |
| 11-03 | Gp4 | g.chr9:71532526T>C   | Silent            | PIP5K1B   | p.H278H  | phosphatidylinositol-4- $\gamma$ | 22 (0.00) | 29 (0.28) | 0.74 |
| 11-03 | Gp4 | g.chr10:3191889G>A   | Missense Mutation | PITRM1    | p.R599W  | pitrilysin metallopeptid         | 15 (0.00) | 20 (0.25) | 0.67 |
| 11-03 | Gp4 | g.chr11:94328503C>T  | Silent            | PIWIL4    | p.F393F  | piwi-like RNA-mediate            | 17 (0.00) | 16 (0.31) | 0.83 |
| 11-03 | Gp4 | g.chr11:94328505A>T  | Missense Mutation | PIWIL4    | p.Q394L  | piwi-like RNA-mediate            | 16 (0.00) | 16 (0.31) | 0.83 |
| 11-03 | Gp4 | g.chr16:71985626C>A  | RNA               | PKD1L3    |          | polycystic kidney diseas         | 52 (0.00) | 47 (0.15) | 0.40 |
| 11-03 | Gp4 | g.chr16:72013971C>T  | RNA               | PKD1L3    |          | polycystic kidney diseas         | 24 (0.00) | 30 (0.30) | 0.80 |
| 11-03 | Gp4 | g.chr10:102055897G>T | Silent            | PKD2L1    | p.L446L  | polycystic kidney diseas         | 15 (0.00) | 54 (0.28) | 0.74 |
| 11-03 | Gp4 | g.chr22:46657785A>G  | Missense Mutation | PKDREJ    | p.F479L  | polycystin (PKD) family          | 34 (0.00) | 25 (0.28) | 0.75 |
| 11-03 | Gp4 | g.chr8:110495331G>A  | Nonsense Mutation | PKHD1L1   | p.W3191* | polycystic kidney and h          | 42 (0.00) | 31 (0.26) | 0.69 |
| 11-03 | Gp4 | g.chr2:28742574C>T   | Missense Mutation | PLB1      | p.H63Y   | phospholipase B1                 | 46 (0.00) | 32 (0.16) | 0.42 |
| 11-03 | Gp4 | g.chr2:28789676G>A   | Missense Mutation | PLB1      | p.E432K  | phospholipase B1                 | 40 (0.00) | 28 (0.50) | 1.33 |
| 11-03 | Gp4 | g.chr20:8639299A>G   | Silent            | PLCB1     | p.Q270Q  | phospholipase C, beta 1          | 22 (0.00) | 54 (0.19) | 0.49 |
| 11-03 | Gp4 | g.chr20:9364943C>T   | Missense Mutation | PLCB4     | p.H317Y  | phospholipase C, beta 4          | 53 (0.00) | 19 (0.32) | 0.84 |
| 11-03 | Gp4 | g.chr10:95791330G>C  | Missense Mutation | PLCE1     | p.G176A  | phospholipase C, epsilo          | 35 (0.00) | 29 (0.17) | 0.46 |
| 11-03 | Gp4 | g.chr16:81944264G>A  | Missense Mutation | PLCG2     | p.A625T  | phospholipase C, gamm            | 21 (0.00) | 19 (0.42) | 1.12 |
| 11-03 | Gp4 | g.chr16:81965173C>A  | Missense Mutation | PLCG2     | p.P885T  | phospholipase C, gamm            | 38 (0.00) | 37 (0.30) | 0.79 |
| 11-03 | Gp4 | g.chr3:155241698G>A  | Silent            | PLCH1     | p.F474F  | phospholipase C, eta 1           | 73 (0.00) | 17 (0.41) | 1.10 |
| 11-03 | Gp4 | g.chr2:198949502C>T  | Nonsense Mutation | PLCL1     | p.Q421*  | phospholipase C-like 1           | 41 (0.00) | 26 (0.31) | 0.82 |
| 11-03 | Gp4 | g.chr3:171323160G>A  | Missense Mutation | PLD1      | p.P939S  | phospholipase D1, phos           | 45 (0.00) | 23 (0.22) | 0.58 |
| 11-03 | Gp4 | g.chr12:19436680G>A  | Splice Site       | PLEKHA5   |          | pleckstrin homology do           | 23 (0.00) | 17 (0.29) | 0.99 |
| 11-03 | Gp4 | g.chr12:45567488C>T  | RNA               | PLEKHA8P1 |          | pleckstrin homology do           | 44 (0.02) | 27 (0.22) | 0.75 |
| 11-03 | Gp4 | g.chr10:115540416C>A | Missense Mutation | PLEKHS1   | p.S158Y  | pleckstrin homology do           | 89 (0.00) | 32 (0.31) | 0.83 |
| 11-03 | Gp4 | g.chr19:4511687G>A   | Missense Mutation | PLIN4     | p.T748I  | perilipin 4                      | 64 (0.00) | 43 (0.12) | 0.39 |
| 11-03 | Gp4 | g.chr19:4512202G>T   | Silent            | PLIN4     | p.A576A  | perilipin 4                      | 66 (0.00) | 64 (0.16) | 0.53 |
| 11-03 | Gp4 | g.chr16:8906932C>T   | Missense Mutation | PMM2      | p.T176I  | phosphomannomutase 2             | 88 (0.00) | 56 (0.16) | 0.43 |

|       |     |                      |                   |          |          |                                    |           |      |
|-------|-----|----------------------|-------------------|----------|----------|------------------------------------|-----------|------|
| 11-03 | Gp4 | g.chr7:6759285C>G    | RNA               | PMS2CL   |          | PMS2 C-terminal like p:116 (0.00)  | 20 (0.35) | 0.93 |
| 11-03 | Gp4 | g.chr6:99848558C>T   | Missense Mutation | PNISR    | p.R759K  | PNN-interacting serine/i:17 (0.00) | 15 (0.47) | 0.51 |
| 11-03 | Gp4 | g.chr10:118351357C>T | Silent            | PNLIPRP1 | p.L42L   | pancreatic lipase-related35 (0.03) | 43 (0.19) | 0.50 |
| 11-03 | Gp4 | g.chr10:118389606G>T | RNA               | PNLIPRP2 |          | pancreatic lipase-related41 (0.00) | 59 (0.15) | 0.41 |
| 11-03 | Gp4 | g.chr1:151378493C>T  | Nonsense Mutation | POGZ     | p.W997*  | pogo transposable elemε:60 (0.00)  | 30 (0.30) | 0.80 |
| 11-03 | Gp4 | g.chr11:65061712C>T  | Silent            | POLA2    | p.L445L  | polymerase (DNA direc:34 (0.00)    | 15 (0.73) | 1.96 |
| 11-03 | Gp4 | g.chr6:43572359C>A   | Missense Mutation | POLH     | p.L298I  | polymerase (DNA direc:26 (0.00)    | 17 (0.47) | 1.25 |
| 11-03 | Gp4 | g.chr3:121240970G>A  | Missense Mutation | POLQ     | p.P379S  | polymerase (DNA direc:67 (0.00)    | 49 (0.16) | 0.44 |
| 11-03 | Gp4 | g.chr2:86292409C>A   | Missense Mutation | POLR1A   | p.W682C  | polymerase (RNA) I pol:15 (0.00)   | 18 (0.28) | 0.74 |
| 11-03 | Gp4 | g.chr10:79741948C>T  | Silent            | POLR3A   | p.V1241V | polymerase (RNA) III (I:16 (0.00)  | 27 (0.19) | 0.49 |
| 11-03 | Gp4 | g.chr3:43122728G>A   | Missense Mutation | POMGNT2  | p.H66Y   | protein O-linked manno:20 (0.00)   | 15 (0.53) | 1.42 |
| 11-03 | Gp4 | g.chr8:128428991C>T  | Nonsense Mutation | POU5F1B  | p.R294*  | POU class 5 homeobox:95 (0.00)     | 38 (0.29) | 0.77 |
| 11-03 | Gp4 | g.chr12:81746960G>A  | Silent            | PPFIA2   | p.S644S  | protein tyrosine phosphε:73 (0.00) | 80 (0.12) | 0.42 |
| 11-03 | Gp4 | g.chr17:57058205A>T  | Missense Mutation | PPM1E    | p.Q694L  | protein phosphatase, Mε:33 (0.00)  | 30 (0.33) | 0.89 |
| 11-03 | Gp4 | g.chr12:111160435C>A | Missense Mutation | PPP1CC   | p.D197Y  | protein phosphatase 1, c:27 (0.00) | 31 (0.26) | 0.90 |
| 11-03 | Gp4 | g.chr2:182928474C>T  | Missense Mutation | PPP1R1C  | p.P73L   | protein phosphatase 1, r:36 (0.00) | 23 (0.22) | 0.58 |
| 11-03 | Gp4 | g.chr11:111625719C>T | Missense Mutation | PPP2R1B  | p.A315T  | protein phosphatase 2, r:36 (0.00) | 35 (0.49) | 1.30 |
| 11-03 | Gp4 | g.chr18:9570610C>T   | Missense Mutation | PPP4R1   | p.S373N  | protein phosphatase 4, r:23 (0.00) | 16 (0.62) | 1.67 |
| 11-03 | Gp4 | g.chr22:22890612C>T  | Silent            | PRAME    | p.E469E  | preferentially expressed:44 (0.00) | 16 (0.56) | 1.50 |
| 11-03 | Gp4 | g.chr1:12885096C>A   | Nonsense Mutation | PRAMEF11 | p.E339*  | PRAME family membe:68 (0.00)       | 12 (0.50) | 1.33 |
| 11-03 | Gp4 | g.chr1:12887442G>A   | Missense Mutation | PRAMEF11 | p.H139Y  | PRAME family membe:94 (0.00)       | 26 (0.23) | 0.62 |
| 11-03 | Gp4 | g.chr1:12836137C>A   | Missense Mutation | PRAMEF12 | p.P247T  | PRAME family membe:67 (0.00)       | 21 (0.33) | 0.89 |
| 11-03 | Gp4 | g.chr1:13474934G>A   | Missense Mutation | PRAMEF18 | p.R399C  | PRAME family membe:22 (0.00)       | 10 (0.60) | 1.60 |
| 11-03 | Gp4 | g.chr6:106552700C>T  | Splice Site       | PRDM1    | p.T186I  | PR domain containing 1:151 (0.00)  | 69 (0.28) | 0.73 |
| 11-03 | Gp4 | g.chr11:129784791G>A | Silent            | PRDM10   | p.S883S  | PR domain containing 1:81 (0.01)   | 29 (0.21) | 0.55 |
| 11-03 | Gp4 | g.chr4:81121376C>T   | Missense Mutation | PRDM8    | p.H48Y   | PR domain containing 8:45 (0.00)   | 39 (0.15) | 0.41 |
| 11-03 | Gp4 | g.chr3:64148728C>T   | Silent            | PRICKLE2 | p.K130K  | prickle homolog 2 (Dro:75 (0.00)   | 62 (0.50) | 1.33 |
| 11-03 | Gp4 | g.chr10:52912978G>C  | Missense Mutation | PRKG1    | p.L122F  | protein kinase, cGMP-d:17 (0.00)   | 14 (0.50) | 1.33 |
| 11-03 | Gp4 | g.chr14:23390247C>T  | Missense Mutation | PRMT5    | p.E594K  | protein arginine methylt:37 (0.00) | 56 (0.21) | 0.57 |
| 11-03 | Gp4 | g.chr14:23393270G>A  | Missense Mutation | PRMT5    | p.A441V  | protein arginine methylt:61 (0.00) | 31 (0.16) | 0.43 |
| 11-03 | Gp4 | g.chr17:27031116G>A  | Silent            | PROCA1   | p.P157P  | protein interacting with:22 (0.00) | 17 (0.29) | 0.78 |
| 11-03 | Gp4 | g.chr14:45576808G>A  | Missense Mutation | PRPF39   | p.D298N  | pre-mRNA processing f:61 (0.00)    | 23 (0.52) | 1.39 |
| 11-03 | Gp4 | g.chr6:4032156C>T    | Silent            | PRPF4B   | p.L135L  | pre-mRNA processing f:29 (0.03)    | 29 (0.28) | 0.74 |
| 11-03 | Gp4 | g.chr17:1576829C>A   | Missense Mutation | PRPF8    | p.R1160L | pre-mRNA processing f:38 (0.00)    | 23 (0.26) | 0.70 |
| 11-03 | Gp4 | g.chr17:157779G>A    | Missense Mutation | PRPF8    | p.R1086C | pre-mRNA processing f:39 (0.00)    | 92 (0.16) | 0.43 |

|       |     |                      |                   |         |          |                                      |           |      |
|-------|-----|----------------------|-------------------|---------|----------|--------------------------------------|-----------|------|
| 11-03 | Gp4 | g.chr17:1577869G>A   | Missense Mutation | PRPF8   | p.H1056Y | pre-mRNA processing f 31 (0.00)      | 41 (0.15) | 0.39 |
| 11-03 | Gp4 | g.chr7:18066805C>A   | Nonsense Mutation | PRPS1L1 | p.E201*  | phosphoribosyl pyropho 82 (0.00)     | 35 (0.34) | 0.91 |
| 11-03 | Gp4 | g.chr22:32109732C>T  | Missense Mutation | PRR14L  | p.D1365N | proline rich 14-like 38 (0.00)       | 29 (0.17) | 0.46 |
| 11-03 | Gp4 | g.chr5:126860475C>T  | Missense Mutation | PRRC1   | p.T119I  | proline-rich coiled-coil 28 (0.00)   | 20 (0.45) | 1.20 |
| 11-03 | Gp4 | g.chr1:171509420G>A  | Missense Mutation | PRRC2C  | p.E937K  | proline-rich coiled-coil 48 (0.02)   | 44 (0.25) | 0.67 |
| 11-03 | Gp4 | g.chr1:171509474G>T  | Missense Mutation | PRRC2C  | p.D955Y  | proline-rich coiled-coil 25 (0.00)   | 33 (0.15) | 0.40 |
| 11-03 | Gp4 | g.chr7:142479858C>A  | RNA               | PRSS3P2 |          | protease, serine, 3 pseud 127 (0.01) | 33 (0.21) | 0.57 |
| 11-03 | Gp4 | g.chr7:142480100C>T  | RNA               | PRSS3P2 |          | protease, serine, 3 pseud 78 (0.00)  | 49 (0.14) | 0.38 |
| 11-03 | Gp4 | g.chr3:46783914C>T   | Missense Mutation | PRSS45  | p.A205T  | protease, serine, 45 36 (0.00)       | 25 (0.20) | 0.53 |
| 11-03 | Gp4 | g.chr9:79322731G>T   | Silent            | PRUNE2  | p.R1487R | prune homolog 2 (Drosoc 16 (0.00)    | 49 (0.14) | 0.38 |
| 11-03 | Gp4 | g.chr9:80921287G>T   | Missense Mutation | PSAT1   | p.C152F  | phosphoserine aminotra 40 (0.00)     | 80 (0.23) | 0.60 |
| 11-03 | Gp4 | g.chr5:139213359G>T  | Missense Mutation | PSD2    | p.A448S  | pleckstrin and Sec7 dom 63 (0.00)    | 36 (0.22) | 0.59 |
| 11-03 | Gp4 | g.chr19:43772089G>T  | Missense Mutation | PSG9    | p.P93T   | pregnancy specific beta-42 (0.00)    | 15 (0.60) | 1.60 |
| 11-03 | Gp4 | g.chr16:74338223C>T  | Missense Mutation | PSMD7   | p.T154I  | proteasome (prosome, n 47 (0.00)     | 45 (0.36) | 0.95 |
| 11-03 | Gp4 | g.chr1:11561447G>A   | Nonsense Mutation | PTCHD2  | p.W133*  | patched domain containi 26 (0.00)    | 17 (0.29) | 0.78 |
| 11-03 | Gp4 | g.chr6:47976800C>T   | Silent            | PTCHD4  | p.V159V  | patched domain containi 16 (0.00)    | 11 (0.55) | 1.45 |
| 11-03 | Gp4 | g.chr10:23482786C>T  | Missense Mutation | PTF1A   | p.S313F  | pancreas specific transcr 58 (0.00)  | 51 (0.65) | 1.73 |
| 11-03 | Gp4 | g.chr12:112926906C>T | Missense Mutation | PTPN11  | p.A509V  | protein tyrosine phosph 21 (0.00)    | 47 (0.13) | 0.44 |
| 11-03 | Gp4 | g.chr7:77168543G>A   | Intron            | PTPN12  |          | protein tyrosine phosph 16 (0.00)    | 40 (0.20) | 0.53 |
| 11-03 | Gp4 | g.chr7:77179387C>T   | Intron            | PTPN12  |          | protein tyrosine phosph 25 (0.00)    | 14 (0.36) | 0.95 |
| 11-03 | Gp4 | g.chr7:77193015T>A   | Intron            | PTPN12  |          | protein tyrosine phosph 39 (0.00)    | 32 (0.19) | 0.50 |
| 11-03 | Gp4 | g.chr7:77201700G>A   | Intron            | PTPN12  |          | protein tyrosine phosph 27 (0.00)    | 37 (0.30) | 0.79 |
| 11-03 | Gp4 | g.chr7:77203966C>A   | Intron            | PTPN12  |          | protein tyrosine phosph 95 (0.00)    | 33 (0.18) | 0.48 |
| 11-03 | Gp4 | g.chr7:77217973C>T   | Intron            | PTPN12  |          | protein tyrosine phosph 15 (0.00)    | 12 (0.42) | 1.11 |
| 11-03 | Gp4 | g.chr7:77239284C>T   | Intron            | PTPN12  |          | protein tyrosine phosph 53 (0.00)    | 20 (0.30) | 0.80 |
| 11-03 | Gp4 | g.chr7:77256781C>A   | Silent            | PTPN12  | p.L595L  | protein tyrosine phosph 33 (0.00)    | 24 (0.25) | 0.67 |
| 11-03 | Gp4 | g.chr4:87622657G>A   | Missense Mutation | PTPN13  | p.A300T  | protein tyrosine phosph 71 (0.00)    | 40 (0.17) | 0.47 |
| 11-03 | Gp4 | g.chr4:87643573C>T   | Nonsense Mutation | PTPN13  | p.Q532*  | protein tyrosine phosph 19 (0.00)    | 29 (0.55) | 1.47 |
| 11-03 | Gp4 | g.chr1:214576281C>A  | Nonsense Mutation | PTPN14  | p.E176*  | protein tyrosine phosph 23 (0.00)    | 15 (0.47) | 1.24 |
| 11-03 | Gp4 | g.chr12:70964968G>A  | Nonsense Mutation | PTPRB   | p.Q982*  | protein tyrosine phosph 38 (0.00)    | 35 (0.20) | 0.67 |
| 11-03 | Gp4 | g.chr19:55702869C>G  | Splice Site       | PTPRH   | p.S795T  | protein tyrosine phosph 36 (0.00)    | 11 (0.45) | 1.21 |
| 11-03 | Gp4 | g.chr18:8376528G>A   | Missense Mutation | PTPRM   | p.G1119E | protein tyrosine phosph 58 (0.00)    | 31 (0.26) | 0.69 |
| 11-03 | Gp4 | g.chr1:29585075C>A   | Silent            | PTPRU   | p.I88I   | protein tyrosine phosph 38 (0.03)    | 28 (0.36) | 0.95 |
| 11-03 | Gp4 | g.chr2:61192560G>A   | Silent            | PUS10   | p.F225F  | pseudouridylate synthas 34 (0.00)    | 24 (0.21) | 0.56 |
| 11-03 | Gp4 | g.chr11:125765951G>A | Nonsense Mutation | PUS3    | p.Q77*   | pseudouridylate synthas 16 (0.00)    | 28 (0.39) | 1.05 |

|       |     |                      |                   |         |          |                                      |            |      |
|-------|-----|----------------------|-------------------|---------|----------|--------------------------------------|------------|------|
| 11-03 | Gp4 | g.chr3:110837619G>A  | Missense Mutation | PVRL3   | p.E184K  | poliovirus receptor-relat 20 (0.00)  | 14 (0.36)  | 0.95 |
| 11-03 | Gp4 | g.chr11:32987854C>T  | Missense Mutation | QSER1   | p.P1531S | glutamine and serine ric 34 (0.00)   | 20 (0.35)  | 0.93 |
| 11-03 | Gp4 | g.chr9:125835889G>T  | Missense Mutation | RABGAP1 | p.R681M  | RAB GTPase activating 45 (0.00)      | 30 (0.30)  | 0.80 |
| 11-03 | Gp4 | g.chr9:125835922A>T  | Missense Mutation | RABGAP1 | p.H692L  | RAB GTPase activating 65 (0.00)      | 42 (0.26)  | 0.70 |
| 11-03 | Gp4 | g.chr7:100961428T>A  | Silent            | RABL5   | p.L61L   | 98 (0.00)                            | 50 (0.42)  | 1.12 |
| 11-03 | Gp4 | g.chr20:55929103G>T  | Silent            | RAE1    | p.L3L    | ribonucleic acid export 47 (0.02)    | 60 (0.15)  | 0.40 |
| 11-03 | Gp4 | g.chr7:39726328G>C   | Missense Mutation | RALA    | p.G21A   | v-ral simian leukemia vi22 (0.00)    | 23 (0.22)  | 0.58 |
| 11-03 | Gp4 | g.chr7:39736384G>A   | Missense Mutation | RALA    | p.A142T  | v-ral simian leukemia vi33 (0.00)    | 43 (0.19)  | 0.50 |
| 11-03 | Gp4 | g.chr2:109368406C>A  | Missense Mutation | RANBP2  | p.Q571K  | RAN binding protein 2 83 (0.01)      | 43 (0.28)  | 0.74 |
| 11-03 | Gp4 | g.chr2:109384206G>A  | Nonsense Mutation | RANBP2  | p.W2404* | RAN binding protein 2 161 (0.00)     | 70 (0.20)  | 0.53 |
| 11-03 | Gp4 | g.chr6:13639884C>T   | Missense Mutation | RANBP9  | p.R479Q  | RAN binding protein 9 62 (0.00)      | 48 (0.15)  | 0.39 |
| 11-03 | Gp4 | g.chr12:69047999A>T  | Missense Mutation | RAP1B   | p.R97S   | RAP1B, member of RA 23 (0.00)        | 20 (0.30)  | 1.01 |
| 11-03 | Gp4 | g.chr11:63312292C>G  | Nonsense Mutation | RARRES3 | p.Y106*  | retinoic acid receptor re: 37 (0.00) | 42 (0.33)  | 0.89 |
| 11-03 | Gp4 | g.chr9:85640716C>T   | Missense Mutation | RASEF   | p.M184I  | RAS and EF-hand doma 67 (0.00)       | 55 (0.20)  | 0.53 |
| 11-03 | Gp4 | g.chr15:38786900G>T  | Silent            | RASGRP1 | p.R648R  | RAS guanyl releasing p: 25 (0.00)    | 35 (0.14)  | 0.38 |
| 11-03 | Gp4 | g.chr2:33745738G>A   | Missense Mutation | RASGRP3 | p.D119N  | RAS guanyl releasing p: 53 (0.00)    | 44 (0.18)  | 0.48 |
| 11-03 | Gp4 | g.chr12:26217707G>A  | Missense Mutation | RASSF8  | p.R127K  | Ras association (RalGD 38 (0.00)     | 42 (0.31)  | 1.04 |
| 11-03 | Gp4 | g.chr13:48959625G>C  | Intron            | RB1     |          | retinoblastoma 1 57 (0.00)           | 35 (0.14)  | 0.38 |
| 11-03 | Gp4 | g.chr13:49019253G>C  | Intron            | RB1     |          | retinoblastoma 1 34 (0.00)           | 16 (0.31)  | 0.83 |
| 11-03 | Gp4 | g.chr13:49020968T>C  | Intron            | RB1     |          | retinoblastoma 1 98 (0.00)           | 67 (0.19)  | 0.52 |
| 11-03 | Gp4 | g.chr8:94746015G>A   | Missense Mutation | RBM12B  | p.P875L  | RNA binding motif prot 98 (0.00)     | 40 (0.50)  | 1.33 |
| 11-03 | Gp4 | g.chr4:40440047G>A   | Silent            | RBM47   | p.F288F  | RNA binding motif prot 22 (0.00)     | 35 (0.14)  | 0.38 |
| 11-03 | Gp4 | g.chr11:66444217C>T  | Missense Mutation | RBM4B   | p.D112N  | RNA binding motif prot 65 (0.00)     | 41 (0.27)  | 0.72 |
| 11-03 | Gp4 | g.chr14:103188726C>A | Silent            | RCOR1   | p.S464S  | REST corepressor 1 50 (0.02)         | 55 (0.20)  | 0.53 |
| 11-03 | Gp4 | g.chr4:39301739G>A   | Silent            | RFC1    | p.L905L  | replication factor C (acti 24 (0.00) | 21 (0.24)  | 0.63 |
| 11-03 | Gp4 | g.chr4:39314421G>T   | Missense Mutation | RFC1    | p.T445K  | replication factor C (acti 46 (0.02) | 63 (0.27)  | 0.72 |
| 11-03 | Gp4 | g.chr16:74666481C>T  | Missense Mutation | RFWD3   | p.S506N  | ring finger and WD repe 77 (0.00)    | 62 (0.16)  | 0.43 |
| 11-03 | Gp4 | g.chr9:3248035G>A    | Silent            | RFX3    | p.G655G  | regulatory factor X, 3 (i: 33 (0.00) | 29 (0.21)  | 0.55 |
| 11-03 | Gp4 | g.chr9:3346698C>T    | Missense Mutation | RFX3    | p.G62R   | regulatory factor X, 3 (i: 19 (0.00) | 37 (0.22)  | 0.58 |
| 11-03 | Gp4 | g.chr15:56388441G>T  | Silent            | RFX7    | p.V398V  | regulatory factor X, 7 42 (0.00)     | 21 (0.24)  | 0.63 |
| 11-03 | Gp4 | g.chr8:101059721C>A  | Missense Mutation | RGS22   | p.G586V  | regulator of G-protein si 21 (0.00)  | 20 (0.30)  | 0.80 |
| 11-03 | Gp4 | g.chr17:63149552G>A  | Missense Mutation | RGS9    | p.V24M   | regulator of G-protein si 63 (0.00)  | 53 (0.32)  | 0.86 |
| 11-03 | Gp4 | g.chr22:45818243C>T  | Silent            | RIBC2   | p.T137T  | RIB43A domain with cc 125 (0.00)     | 119 (0.15) | 0.40 |
| 11-03 | Gp4 | g.chr6:72678707G>A   | Silent            | RIMS1   | p.A62A   | regulating synaptic men 76 (0.00)    | 59 (0.31)  | 0.81 |
| 11-03 | Gp4 | g.chr8:104778745C>A  | Silent            | RIMS2   | p.A226A  | regulating synaptic men 24 (0.00)    | 25 (0.48)  | 1.28 |

|       |     |                     |                   |                |          |                           |            |            |      |
|-------|-----|---------------------|-------------------|----------------|----------|---------------------------|------------|------------|------|
| 11-03 | Gp4 | g.chr1:40705348C>T  | Silent            | RLF            | p.S1658S | rearranged L-myc fusion   | 25 (0.00)  | 44 (0.16)  | 0.42 |
| 11-03 | Gp4 | g.chrX:73811368G>A  | Silent            | RLIM           | p.V594V  | ring finger protein, LIM  | 15 (0.00)  | 38 (0.47)  | 0.79 |
| 11-03 | Gp4 | g.chr2:38231320C>T  | Silent            | RMDN2          | p.F380F  | regulator of microtubule  | 30 (0.00)  | 19 (0.37)  | 0.98 |
| 11-03 | Gp4 | g.chr9:86617431G>T  | Silent            | RMI1           | p.V510V  | RecQ mediated genome      | 44 (0.00)  | 31 (0.23)  | 0.60 |
| 11-03 | Gp4 | g.chrX:106034405G>A | Missense Mutation | RNF128         | p.G365E  | ring finger protein 128,  | 24 (0.00)  | 42 (0.36)  | 0.60 |
| 11-03 | Gp4 | g.chr5:158585792G>A | Silent            | RNF145         | p.S656S  | ring finger protein 145   | 16 (0.00)  | 27 (0.19)  | 0.49 |
| 11-03 | Gp4 | g.chr4:141832342G>A | Missense Mutation | RNF150         | p.T385I  | ring finger protein 150   | 25 (0.00)  | 16 (0.62)  | 1.67 |
| 11-03 | Gp4 | g.chr17:74150395T>A | Silent            | RNF157         | p.I593I  | ring finger protein 157   | 20 (0.00)  | 23 (0.35)  | 0.93 |
| 11-03 | Gp4 | g.chr9:104302606C>T | Missense Mutation | RNF20          | p.A84V   | ring finger protein 20, E | 25 (0.00)  | 13 (0.54)  | 1.44 |
| 11-03 | Gp4 | g.chr9:104307110G>T | Missense Mutation | RNF20          | p.M230I  | ring finger protein 20, E | 42 (0.00)  | 41 (0.27)  | 0.72 |
| 11-03 | Gp4 | g.chr9:104323451A>T | Missense Mutation | RNF20          | p.D863V  | ring finger protein 20, E | 23 (0.00)  | 11 (0.45)  | 1.21 |
| 11-03 | Gp4 | g.chr1:44878363C>T  | Silent            | RNF220         | p.A198A  | ring finger protein 220   | 33 (0.00)  | 35 (0.14)  | 0.38 |
| 11-03 | Gp4 | g.chr3:78700992G>A  | Missense Mutation | ROBO1          | p.A901V  | roundabout, axon guidance | 32 (0.00)  | 49 (0.20)  | 0.54 |
| 11-03 | Gp4 | g.chr3:78701064G>T  | Missense Mutation | ROBO1          | p.P877H  | roundabout, axon guidance | 26 (0.00)  | 44 (0.18)  | 0.48 |
| 11-03 | Gp4 | g.chr20:34288785C>A | Missense Mutation | ROMO1          | p.T66N   | reactive oxygen species   | 76 (0.00)  | 77 (0.31)  | 0.83 |
| 11-03 | Gp4 | g.chr8:55539476C>T  | Silent            | RP1            | p.L1012L | retinitis pigmentosa 1 (a | 71 (0.00)  | 55 (0.22)  | 0.58 |
| 11-03 | Gp4 | g.chr16:18810103C>A | Missense Mutation | RP11-1035H1.1  | p.M30I   |                           | 41 (0.00)  | 42 (0.33)  | 0.89 |
| 11-03 | Gp4 | g.chr11:18231398G>A | Missense Mutation | RP11-113D6.1   | p.V62I   |                           | 43 (0.00)  | 41 (0.29)  | 0.78 |
| 11-03 | Gp4 | g.chr16:32077314G>A | RNA               | RP11-1166P10.6 |          |                           | 51 (0.02)  | 40 (0.17)  | 0.47 |
| 11-03 | Gp4 | g.chr5:177398567C>A | RNA               | RP11-1252I4.2  |          |                           | 25 (0.00)  | 128 (0.26) | 0.69 |
| 11-03 | Gp4 | g.chr17:45009477C>T | Missense Mutation | RP11-156P1.2   | p.A83V   |                           | 66 (0.00)  | 17 (0.35)  | 0.94 |
| 11-03 | Gp4 | g.chr9:44869117C>T  | Missense Mutation | RP11-160N1.1   | p.A12V   |                           | 41 (0.00)  | 30 (0.17)  | 0.44 |
| 11-03 | Gp4 | g.chr7:128108947C>A | RNA               | RP11-212P7.3   |          |                           | 24 (0.00)  | 39 (0.26)  | 0.68 |
| 11-03 | Gp4 | g.chr10:51816552C>A | RNA               | RP11-324H6.5   |          |                           | 17 (0.00)  | 17 (0.29)  | 0.78 |
| 11-03 | Gp4 | g.chr10:28725815G>A | lincRNA           | RP11-351M16.3  |          |                           | 63 (0.02)  | 51 (0.20)  | 0.52 |
| 11-03 | Gp4 | g.chr3:125509250G>T | lincRNA           | RP11-379B18.6  |          |                           | 198 (0.00) | 71 (0.17)  | 0.45 |
| 11-03 | Gp4 | g.chr12:25956474G>A | lincRNA           | RP11-443N24.2  |          |                           | 19 (0.00)  | 23 (0.26)  | 0.87 |
| 11-03 | Gp4 | g.chr1:247393974T>C | lincRNA           | RP11-488L18.8  |          |                           | 34 (0.00)  | 27 (0.30)  | 0.79 |
| 11-03 | Gp4 | g.chr3:110612121T>A | Missense Mutation | RP11-553A10    | p.K30M   |                           | 45 (0.00)  | 28 (0.18)  | 0.48 |
| 11-03 | Gp4 | g.chr3:110612158G>T | Missense Mutation | RP11-553A10    | p.H18N   |                           | 46 (0.00)  | 21 (0.33)  | 0.89 |
| 11-03 | Gp4 | g.chr4:99877244G>T  | RNA               | RP11-571L19.7  |          |                           | 45 (0.00)  | 36 (0.28)  | 0.74 |
| 11-03 | Gp4 | g.chr12:56110750C>G | Missense Mutation | RP11-644F5.1   | p.T60S   |                           | 62 (0.00)  | 35 (0.20)  | 0.66 |
| 11-03 | Gp4 | g.chr16:32619481C>T | RNA               | RP11-652G5.1   |          |                           | 25 (0.00)  | 20 (0.30)  | 0.80 |
| 11-03 | Gp4 | g.chr11:82516626G>A | lincRNA           | RP11-718B12.2  |          |                           | 20 (0.00)  | 11 (0.45)  | 1.21 |
| 11-03 | Gp4 | g.chr12:9716852G>T  | RNA               | RP11-726G1.1   |          |                           | 18 (0.00)  | 19 (0.37)  | 1.23 |

|       |     |                      |                   |               |          |                            |            |           |      |
|-------|-----|----------------------|-------------------|---------------|----------|----------------------------|------------|-----------|------|
| 11-03 | Gp4 | g.chr11:94647215G>C  | RNA               | RP11-856F16.2 |          |                            | 43 (0.00)  | 37 (0.22) | 0.58 |
| 11-03 | Gp4 | g.chr10:27537845C>T  | lincRNA           | RP11-85G18.6  |          |                            | 58 (0.00)  | 33 (0.18) | 0.48 |
| 11-03 | Gp4 | g.chr20:1559180G>A   | Silent            | RP4-576H24.4  | p.Y79Y   |                            | 93 (0.00)  | 68 (0.44) | 1.18 |
| 11-03 | Gp4 | g.chr14:21795806C>T  | Missense Mutation | RPGRIP1       | p.A912V  | retinitis pigmentosa GTI   | 66 (0.02)  | 34 (0.26) | 0.71 |
| 11-03 | Gp4 | g.chr16:53698892C>A  | Missense Mutation | RPGRIP1L      | p.W378L  | RPGRIP1-like               | 36 (0.00)  | 30 (0.27) | 0.71 |
| 11-03 | Gp4 | g.chr22:39713578C>T  | Missense Mutation | RPL3          | p.V85M   | ribosomal protein L3       | 41 (0.00)  | 29 (0.17) | 0.46 |
| 11-03 | Gp4 | g.chr2:101620745G>A  | Splice Site       | RPL31         | p.R78K   | ribosomal protein L31      | 39 (0.00)  | 20 (0.35) | 0.93 |
| 11-03 | Gp4 | g.chr15:66793750C>T  | Silent            | RPL4          | p.E119E  | ribosomal protein L4       | 63 (0.00)  | 26 (0.23) | 0.62 |
| 11-03 | Gp4 | g.chr3:128344434G>A  | Silent            | RPN1          | p.F446F  | ribophorin I               | 46 (0.02)  | 39 (0.46) | 1.23 |
| 11-03 | Gp4 | g.chr1:150418788G>A  | Missense Mutation | RPRD2         | p.V261M  | regulation of nuclear pr   | 61 (0.00)  | 43 (0.16) | 0.43 |
| 11-03 | Gp4 | g.chr1:150443968C>T  | Silent            | RPRD2         | p.N848N  | regulation of nuclear pr   | 33 (0.00)  | 33 (0.18) | 0.48 |
| 11-03 | Gp4 | g.chr1:114320399C>T  | Missense Mutation | RSBN1         | p.R470Q  | round spermatid basic p    | 45 (0.00)  | 30 (0.23) | 0.62 |
| 11-03 | Gp4 | g.chr22:32792073G>A  | Silent            | RTCB          | p.F326F  | RNA 2',3'-cyclic phosph    | 69 (0.00)  | 54 (0.24) | 0.64 |
| 11-03 | Gp4 | g.chr22:32792082G>A  | Silent            | RTCB          | p.S323S  | RNA 2',3'-cyclic phosph    | 72 (0.00)  | 54 (0.24) | 0.64 |
| 11-03 | Gp4 | g.chr15:41766842G>A  | Missense Mutation | RTF1          | p.E410K  | Rtf1, Paf1/RNA polyme      | 26 (0.00)  | 31 (0.26) | 0.69 |
| 11-03 | Gp4 | g.chr3:46542175G>T   | Missense Mutation | RTP3          | p.C162F  | receptor (chemosensory     | 16 (0.00)  | 19 (0.26) | 0.70 |
| 11-03 | Gp4 | g.chr4:71670070G>A   | Silent            | RUFY3         | p.Q552Q  | RUN and FYVE domain        | 28 (0.00)  | 16 (0.38) | 1.00 |
| 11-03 | Gp4 | g.chr1:237947892C>A  | Missense Mutation | RYR2          | p.L4294I | ryanodine receptor 2 (ca   | 27 (0.00)  | 14 (0.43) | 1.14 |
| 11-03 | Gp4 | g.chr15:33831613C>T  | Nonsense Mutation | RYR3          | p.R166*  | ryanodine receptor 3       | 22 (0.00)  | 63 (0.22) | 0.59 |
| 11-03 | Gp4 | g.chr15:34118467C>T  | Missense Mutation | RYR3          | p.R3721C | ryanodine receptor 3       | 59 (0.00)  | 55 (0.20) | 0.53 |
| 11-03 | Gp4 | g.chr15:34127210G>T  | Missense Mutation | RYR3          | p.R3835S | ryanodine receptor 3       | 92 (0.00)  | 34 (0.15) | 0.39 |
| 11-03 | Gp4 | g.chr13:23904448C>T  | Missense Mutation | SACS          | p.V4523I | sacsin molecular chaper    | 50 (0.02)  | 25 (0.20) | 0.53 |
| 11-03 | Gp4 | g.chr13:23914732C>T  | Missense Mutation | SACS          | p.E1095K | sacsin molecular chaper    | 18 (0.00)  | 34 (0.21) | 0.55 |
| 11-03 | Gp4 | g.chr19:5621404C>T   | Missense Mutation | SAFB2         | p.V64I   | scaffold attachment fact   | 128 (0.00) | 65 (0.17) | 0.57 |
| 11-03 | Gp4 | g.chr16:51175937T>A  | Missense Mutation | SALL1         | p.T66S   | spalt-like transcription f | 35 (0.00)  | 18 (0.33) | 0.89 |
| 11-03 | Gp4 | g.chr14:21992727C>A  | Missense Mutation | SALL2         | p.A379S  | spalt-like transcription f | 50 (0.00)  | 15 (0.40) | 1.07 |
| 11-03 | Gp4 | g.chr7:92731138T>A   | Missense Mutation | SAMD9         | p.T1425S | sterile alpha motif doma   | 49 (0.00)  | 20 (0.35) | 0.93 |
| 11-03 | Gp4 | g.chr7:92733365G>A   | Silent            | SAMD9         | p.D682D  | sterile alpha motif doma   | 71 (0.00)  | 58 (0.16) | 0.41 |
| 11-03 | Gp4 | g.chr7:92762834G>T   | Silent            | SAMD9L        | p.A817A  | sterile alpha motif doma   | 35 (0.00)  | 17 (0.29) | 0.78 |
| 11-03 | Gp4 | g.chr12:108938207G>A | Silent            | SART3         | p.L259L  | squamous cell carcinom     | 63 (0.00)  | 36 (0.14) | 0.48 |
| 11-03 | Gp4 | g.chr21:33069058C>A  | Missense Mutation | SCAF4         | p.L261F  | SR-related CTD-associa     | 38 (0.00)  | 26 (0.23) | 0.62 |
| 11-03 | Gp4 | g.chr6:155153172T>A  | Missense Mutation | SCAF8         | p.V820E  | SR-related CTD-associa     | 23 (0.00)  | 24 (0.21) | 0.56 |
| 11-03 | Gp4 | g.chr1:41512203G>A   | Silent            | SCMH1         | p.R448R  | sex comb on midleg hor     | 19 (0.00)  | 17 (0.29) | 0.78 |
| 11-03 | Gp4 | g.chr3:38768514C>G   | Missense Mutation | SCN10A        | p.L890F  | sodium channel, voltage    | 43 (0.00)  | 25 (0.32) | 0.85 |
| 11-03 | Gp4 | g.chr3:38768529G>A   | Silent            | SCN10A        | p.F885F  | sodium channel, voltage    | 41 (0.00)  | 23 (0.35) | 0.93 |



|       |     |                      |                   |           |          |                           |            |           |      |
|-------|-----|----------------------|-------------------|-----------|----------|---------------------------|------------|-----------|------|
| 11-03 | Gp4 | g.chr3:38833661T>C   | Splice Site       | SCN10A    |          | sodium channel, voltage   | 42 (0.00)  | 23 (0.26) | 0.70 |
| 11-03 | Gp4 | g.chr2:166245215T>A  | Silent            | SCN2A     | p.I1633I | sodium channel, voltage   | 22 (0.00)  | 50 (0.18) | 0.48 |
| 11-03 | Gp4 | g.chr2:166003315G>C  | Missense Mutation | SCN3A     | p.S535R  | sodium channel, voltage   | 64 (0.00)  | 71 (0.17) | 0.45 |
| 11-03 | Gp4 | g.chr12:52162966C>T  | Silent            | SCN8A     | p.S1073S | sodium channel, voltage   | 28 (0.00)  | 17 (0.41) | 0.85 |
| 11-03 | Gp4 | g.chr12:52180584G>A  | Missense Mutation | SCN8A     | p.A1401T | sodium channel, voltage   | 97 (0.00)  | 82 (0.20) | 0.40 |
| 11-03 | Gp4 | g.chr2:167141181C>T  | Missense Mutation | SCN9A     | p.G586S  | sodium channel, voltage   | 44 (0.00)  | 46 (0.15) | 0.41 |
| 11-03 | Gp4 | g.chr11:9096158C>A   | Silent            | SCUBE2    | p.V129V  | signal peptide, CUB dor   | 88 (0.01)  | 21 (0.29) | 0.76 |
| 11-03 | Gp4 | g.chr1:169822862T>A  | Missense Mutation | SCYL3     | p.N741Y  | SCY1-like 3 (S. cerevisi  | 48 (0.00)  | 59 (0.19) | 0.50 |
| 11-03 | Gp4 | g.chr10:121692579A>G | Missense Mutation | SEC23IP   | p.M941V  | SEC23 interacting prote   | 20 (0.00)  | 13 (0.38) | 1.03 |
| 11-03 | Gp4 | g.chr15:49325161C>T  | Splice Site       | SECISBP2L |          | SECIS binding protein     | 271 (0.00) | 75 (0.19) | 0.50 |
| 11-03 | Gp4 | g.chr14:81952694G>A  | Silent            | SEL1L     | p.L579L  | sel-1 suppressor of lin-1 | 106 (0.00) | 40 (0.17) | 0.47 |
| 11-03 | Gp4 | g.chr2:74902898G>A   | Missense Mutation | SEMA4F    | p.R502H  | sema domain, immunog      | 60 (0.02)  | 41 (0.37) | 0.98 |
| 11-03 | Gp4 | g.chr5:9066540G>T    | Silent            | SEMA5A    | p.S764S  | sema domain, seven thr    | 56 (0.00)  | 41 (0.15) | 0.39 |
| 11-03 | Gp4 | g.chr14:94844798G>T  | Silent            | SERPINA1  | p.P415P  | serpin peptidase inhibi   | 16 (0.00)  | 14 (0.93) | 2.48 |
| 11-03 | Gp4 | g.chr3:47144880G>A   | Missense Mutation | SETD2     | p.R1625C | SET domain containing     | 19 (0.00)  | 26 (0.35) | 0.92 |
| 11-03 | Gp4 | g.chr3:9488972G>A    | Missense Mutation | SETD5     | p.R588Q  | SET domain containing     | 45 (0.02)  | 23 (0.61) | 1.62 |
| 11-03 | Gp4 | g.chr1:150933049G>A  | Silent            | SETDB1    | p.L837L  | SET domain, bifurcated    | 19 (0.00)  | 47 (0.17) | 0.45 |
| 11-03 | Gp4 | g.chr9:135218141C>A  | Missense Mutation | SETX      | p.C145F  | senataxin                 | 18 (0.00)  | 54 (0.15) | 0.40 |
| 11-03 | Gp4 | g.chr17:27286396A>T  | Silent            | SEZ6      | p.G622G  | seizure related 6 homol   | 23 (0.00)  | 23 (0.26) | 0.70 |
| 11-03 | Gp4 | g.chr22:31979931T>A  | Nonsense Mutation | SFI1      | p.L409*  | Sfi1 homolog, spindle a   | 16 (0.00)  | 26 (0.73) | 1.95 |
| 11-03 | Gp4 | g.chr12:132212866C>T | Missense Mutation | SFSWAP    | p.P325L  | splicing factor, suppress | 43 (0.00)  | 70 (0.13) | 0.45 |
| 11-03 | Gp4 | g.chr10:102794598C>T | Silent            | SFXN3     | p.I49I   | sideroflexin 3            | 48 (0.00)  | 39 (0.26) | 0.68 |
| 11-03 | Gp4 | g.chr10:120917425G>A | Silent            | SFXN4     | p.A143A  | sideroflexin 4            | 26 (0.00)  | 15 (0.33) | 0.89 |
| 11-03 | Gp4 | g.chr10:72604314G>T  | Nonsense Mutation | SGPL1     | p.E38*   | sphingosine-1-phosphat    | 27 (0.00)  | 16 (0.31) | 0.83 |
| 11-03 | Gp4 | g.chr22:40797615G>A  | Missense Mutation | SGSM3     | p.C9Y    | small G protein signalin  | 17 (0.00)  | 47 (0.17) | 0.45 |
| 11-03 | Gp4 | g.chr15:84237329G>A  | Missense Mutation | SH3GL3    | p.G79E   | SH3-domain GRB2-like      | 21 (0.00)  | 21 (0.24) | 0.63 |
| 11-03 | Gp4 | g.chr4:170189980G>T  | Silent            | SH3RF1    | p.P128P  | SH3 domain containing     | 27 (0.00)  | 22 (0.36) | 0.97 |
| 11-03 | Gp4 | g.chr19:51200901T>C  | Missense Mutation | SHANK1    | p.K628E  | SH3 and multiple ankyr    | 23 (0.00)  | 34 (0.18) | 0.47 |
| 11-03 | Gp4 | g.chr3:72802256C>A   | Intron            | SHQ1      |          | SHQ1, H/ACA ribonucl      | 28 (0.00)  | 44 (0.18) | 0.48 |
| 11-03 | Gp4 | g.chr3:72820001C>T   | Intron            | SHQ1      |          | SHQ1, H/ACA ribonucl      | 28 (0.00)  | 11 (0.45) | 1.21 |
| 11-03 | Gp4 | g.chr3:72835821G>A   | Intron            | SHQ1      |          | SHQ1, H/ACA ribonucl      | 54 (0.00)  | 19 (0.26) | 0.70 |
| 11-03 | Gp4 | g.chr3:72840422C>A   | Intron            | SHQ1      |          | SHQ1, H/ACA ribonucl      | 28 (0.00)  | 20 (0.30) | 0.80 |
| 11-03 | Gp4 | g.chr3:72866404G>A   | Missense Mutation | SHQ1      | p.R287C  | SHQ1, H/ACA ribonucl      | 21 (0.00)  | 33 (0.15) | 0.40 |
| 11-03 | Gp4 | g.chr3:72867355G>C   | Intron            | SHQ1      |          | SHQ1, H/ACA ribonucl      | 31 (0.00)  | 51 (0.16) | 0.42 |
| 11-03 | Gp4 | g.chr3:72876197G>A   | Intron            | SHQ1      |          | SHQ1, H/ACA ribonucl      | 63 (0.02)  | 23 (0.26) | 0.70 |

|       |     |                      |                   |          |          |                           |                        |            |      |
|-------|-----|----------------------|-------------------|----------|----------|---------------------------|------------------------|------------|------|
| 11-03 | Gp4 | g.chr3:72896102C>T   | Intron            | SHQ1     |          | SHQ1, H/ACA ribonucl      | 22 (0.00)              | 15 (0.40)  | 1.07 |
| 11-03 | Gp4 | g.chr3:72897315G>A   | Intron            | SHQ1     |          | SHQ1, H/ACA ribonucl      | 33 (0.00)              | 23 (0.96)  | 2.55 |
| 11-03 | Gp4 | g.chr4:77660974G>A   | Missense Mutation | SHROOM3  | p.A550T  | shroom family member      | 34 (0.00)              | 15 (0.67)  | 1.78 |
| 11-03 | Gp4 | g.chr3:164760867G>A  | Missense Mutation | SI       | p.H662Y  | sucrase-isomaltase (alph  | 19 (0.00)              | 39 (0.21)  | 0.55 |
| 11-03 | Gp4 | g.chr3:113321931C>T  | Silent            | SIDT1    | p.S399S  | SID1 transmembrane fa     | 18 (0.00)              | 27 (0.52)  | 1.38 |
| 11-03 | Gp4 | g.chr19:51769062G>T  | Silent            | SIGLECL1 | p.V112V  | SIGLEC family like 1      | 81 (0.01)              | 100 (0.19) | 0.51 |
| 11-03 | Gp4 | g.chr11:116734442G>A | Missense Mutation | SIK3     | p.A634V  | SIK family kinase 3       | 24 (0.00)              | 11 (0.64)  | 1.70 |
| 11-03 | Gp4 | g.chr1:232600850A>G  | Silent            | SIPA1L2  | p.I852I  | signal-induced prolifera  | 34 (0.00)              | 51 (0.20)  | 0.52 |
| 11-03 | Gp4 | g.chr1:232601124C>G  | Missense Mutation | SIPA1L2  | p.G761A  | signal-induced prolifera  | 51 (0.00)              | 10 (0.50)  | 1.33 |
| 11-03 | Gp4 | g.chr20:1903108G>C   | Missense Mutation | SIRPA    | p.V302L  | signal-regulatory protei  | 84 (0.00)              | 31 (0.48)  | 1.29 |
| 11-03 | Gp4 | g.chr13:21742236C>T  | Missense Mutation | SKA3     | p.D212N  | spindle and kinetochore   | 53 (0.00)              | 43 (0.16)  | 0.43 |
| 11-03 | Gp4 | g.chr15:68118514C>T  | Silent            | SKOR1    | p.I302I  | SKI family transcription  | 15 (0.00)              | 35 (0.14)  | 0.38 |
| 11-03 | Gp4 | g.chr13:103718389C>T | Missense Mutation | SLC10A2  | p.G71S   | solute carrier family 10  | 17 (0.00)              | 24 (0.25)  | 0.67 |
| 11-03 | Gp4 | g.chr15:48594964G>A  | Missense Mutation | SLC12A1  | p.R1061K | solute carrier family 12  | 114 (0.01)             | 27 (0.19)  | 0.49 |
| 11-03 | Gp4 | g.chr12:16397695G>A  | Missense Mutation | SLC15A5  | p.A265V  | solute carrier family 15, | 28 (0.00)              | 40 (0.15)  | 0.50 |
| 11-03 | Gp4 | g.chr12:60165054C>T  | Missense Mutation | SLC16A7  | p.A91V   | solute carrier family 16  | 36 (0.00)              | 39 (0.36)  | 1.19 |
| 11-03 | Gp4 | g.chr19:49938517C>T  | Silent            | SLC17A7  | p.E114E  | solute carrier family 17  | 59 (0.00)              | 53 (0.30)  | 0.81 |
| 11-03 | Gp4 | g.chr11:35339048G>A  | Silent            | SLC1A2   | p.P2P    | solute carrier family 1   | ( $\epsilon$ 27 (0.00) | 29 (0.52)  | 1.38 |
| 11-03 | Gp4 | g.chr11:62984861G>A  | Missense Mutation | SLC22A25 | p.A252V  | solute carrier family 22, | 31 (0.00)              | 24 (0.33)  | 0.89 |
| 11-03 | Gp4 | g.chr3:48929501C>T   | Missense Mutation | SLC25A20 | p.R37Q   | solute carrier family 25  | 15 (0.00)              | 31 (0.29)  | 0.77 |
| 11-03 | Gp4 | g.chr1:108700228C>A  | Silent            | SLC25A24 | p.G156G  | solute carrier family 25  | 27 (0.00)              | 32 (0.22)  | 0.58 |
| 11-03 | Gp4 | g.chr15:45562400C>T  | Missense Mutation | SLC28A2  | p.A525V  | solute carrier family 28  | 49 (0.02)              | 42 (0.19)  | 0.51 |
| 11-03 | Gp4 | g.chr12:40441927G>A  | Silent            | SLC2A13  | p.L214L  | solute carrier family 2   | (t56 (0.00)            | 19 (0.37)  | 1.24 |
| 11-03 | Gp4 | g.chr1:1601543C>A    | Missense Mutation | SLC35E2B | p.R252M  | solute carrier family 35, | 32 (0.00)              | 49 (0.16)  | 0.44 |
| 11-03 | Gp4 | g.chr12:46598126A>G  | Silent            | SLC38A1  | p.N260N  | solute carrier family 38, | 16 (0.00)              | 17 (0.41)  | 1.39 |
| 11-03 | Gp4 | g.chr5:54929695C>T   | Silent            | SLC38A9  | p.L376L  | solute carrier family 38, | 31 (0.00)              | 22 (0.32)  | 0.85 |
| 11-03 | Gp4 | g.chr18:33694112C>G  | Missense Mutation | SLC39A6  | p.W597C  | solute carrier family 39  | 23 (0.00)              | 38 (0.21)  | 0.56 |
| 11-03 | Gp4 | g.chr2:162799378G>A  | Missense Mutation | SLC4A10  | p.D692N  | solute carrier family 4,  | s34 (0.00)             | 37 (0.16)  | 0.43 |
| 11-03 | Gp4 | g.chr12:85266943A>G  | Silent            | SLC6A15  | p.T237T  | solute carrier family 6   | (t31 (0.00)            | 32 (0.16)  | 0.52 |
| 11-03 | Gp4 | g.chr3:170198520G>A  | Silent            | SLC7A14  | p.T517T  | solute carrier family 7,  | r66 (0.02)             | 15 (0.67)  | 1.78 |
| 11-03 | Gp4 | g.chr14:23249169C>T  | Silent            | SLC7A7   | p.A197A  | solute carrier family 7   | ( $\epsilon$ 33 (0.03) | 47 (0.15)  | 0.40 |
| 11-03 | Gp4 | g.chr2:103148885C>T  | Missense Mutation | SLC9A4   | p.P712L  | solute carrier family 9,  | s45 (0.00)             | 23 (0.35)  | 0.93 |
| 11-03 | Gp4 | g.chr16:67291323G>A  | Missense Mutation | SLC9A5   | p.E471K  | solute carrier family 9,  | s46 (0.00)             | 26 (0.19)  | 0.51 |
| 11-03 | Gp4 | g.chr12:98849670C>A  | RNA               | SLC9A7P1 |          | solute carrier family 9,  | s40 (0.00)             | 13 (0.62)  | 2.10 |
| 11-03 | Gp4 | g.chr17:33679542C>G  | Missense Mutation | SLFN11   | p.D847H  | schlafen family member    | 62 (0.00)              | 20 (0.40)  | 1.07 |

|       |     |                     |                   |           |          |                          |            |           |      |
|-------|-----|---------------------|-------------------|-----------|----------|--------------------------|------------|-----------|------|
| 11-03 | Gp4 | g.chr4:20568908G>A  | Missense Mutation | SLIT2     | p.A917T  | slit homolog 2 (Drosoph  | 28 (0.04)  | 17 (0.41) | 1.10 |
| 11-03 | Gp4 | g.chr5:168244389C>T | Missense Mutation | SLIT3     | p.G237S  | slit homolog 3 (Drosoph  | 28 (0.00)  | 25 (0.48) | 1.28 |
| 11-03 | Gp4 | g.chr13:88329349G>A | Missense Mutation | SLITRK5   | p.C569Y  | SLIT and NTRK-like fa    | 38 (0.00)  | 37 (0.24) | 0.65 |
| 11-03 | Gp4 | g.chr20:43881723C>T | Missense Mutation | SLPI      | p.C105Y  | secretory leukocyte pep  | 38 (0.00)  | 15 (0.33) | 0.89 |
| 11-03 | Gp4 | g.chr20:43881788C>T | Silent            | SLPI      | p.R83R   | secretory leukocyte pep  | 53 (0.00)  | 30 (0.33) | 0.89 |
| 11-03 | Gp4 | g.chr5:159833525C>T | Missense Mutation | SLU7      | p.A413T  | SLU7 splicing factor ho  | 24 (0.00)  | 23 (0.35) | 0.93 |
| 11-03 | Gp4 | g.chr18:48597013C>A | Intron            | SMAD4     |          | SMAD family member       | 42 (0.00)  | 35 (0.14) | 0.38 |
| 11-03 | Gp4 | g.chr4:95174131C>T  | Silent            | SMARCAD1  | p.L418L  | SWI/SNF-related, matri   | 32 (0.00)  | 24 (0.38) | 1.00 |
| 11-03 | Gp4 | g.chr17:18220807G>A | Silent            | SMCR8     | p.E568E  | Smith-Magenis syndrom    | 41 (0.00)  | 33 (0.33) | 0.89 |
| 11-03 | Gp4 | g.chr16:18845577C>A | Missense Mutation | SMG1      | p.M2838I | SMG1 phosphatidylinos    | 24 (0.00)  | 16 (0.31) | 0.83 |
| 11-03 | Gp4 | g.chr17:57290884G>T | Silent            | SMG8      | p.L900L  | SMG8 nonsense mediato    | 67 (0.00)  | 23 (0.22) | 0.58 |
| 11-03 | Gp4 | g.chr2:88367396A>G  | Missense Mutation | SMYD1     | p.R5G    | SET and MYND domain      | 20 (0.00)  | 19 (0.26) | 0.70 |
| 11-03 | Gp4 | g.chr17:1687672G>A  | Silent            | SMYD4     | p.D656D  | SET and MYND domain      | 41 (0.00)  | 34 (0.26) | 0.71 |
| 11-03 | Gp4 | g.chr17:1687716C>A  | Nonsense Mutation | SMYD4     | p.E642*  | SET and MYND domain      | 45 (0.00)  | 41 (0.17) | 0.46 |
| 11-03 | Gp4 | g.chr17:47018293C>G | Silent            | SNF8      | p.P79P   | SNF8, ESCRT-II compl     | 34 (0.00)  | 45 (0.42) | 1.13 |
| 11-03 | Gp4 | g.chr15:25335176C>A | RNA               | SNHG14    |          | small nucleolar RNA ho   | 98 (0.00)  | 42 (0.38) | 1.02 |
| 11-03 | Gp4 | g.chr2:96957167G>A  | Missense Mutation | SNRNP200  | p.T795I  | small nuclear ribonuclec | 81 (0.00)  | 51 (0.16) | 0.42 |
| 11-03 | Gp4 | g.chr1:31742050C>A  | Missense Mutation | SNRNP40   | p.E271D  | small nuclear ribonuclec | 49 (0.00)  | 61 (0.16) | 0.44 |
| 11-03 | Gp4 | g.chr20:16721549G>A | Missense Mutation | SNRPB2    | p.E193K  | small nuclear ribonuclec | 18 (0.00)  | 26 (0.19) | 0.51 |
| 11-03 | Gp4 | g.chr20:17923754C>G | Splice Site       | SNX5      | p.R388S  | sorting nexin 5          | 61 (0.00)  | 37 (0.27) | 0.72 |
| 11-03 | Gp4 | g.chr20:17923758G>A | Missense Mutation | SNX5      | p.A387V  | sorting nexin 5          | 60 (0.00)  | 36 (0.25) | 0.67 |
| 11-03 | Gp4 | g.chr18:67992132G>A | Silent            | SOCS6     | p.T76T   | suppressor of cytokine s | 80 (0.00)  | 94 (0.21) | 0.57 |
| 11-03 | Gp4 | g.chr20:35443539G>A | Missense Mutation | SOGA1     | p.S769L  | suppressor of glucose, a | 66 (0.00)  | 65 (0.23) | 0.62 |
| 11-03 | Gp4 | g.chr21:34924773C>T | Missense Mutation | SON       | p.A1079V | SON DNA binding prot     | 20 (0.00)  | 14 (0.36) | 0.95 |
| 11-03 | Gp4 | g.chr10:97101048G>A | Silent            | SORBS1    | p.F888F  | sorbin and SH3 domain    | 42 (0.02)  | 36 (0.19) | 0.52 |
| 11-03 | Gp4 | g.chr11:16007806C>T | Silent            | SOX6      | p.E689E  | SRY (sex determining r   | 66 (0.00)  | 61 (0.30) | 0.79 |
| 11-03 | Gp4 | g.chr2:174819887C>T | Silent            | SP3       | p.Q451Q  | Sp3 transcription factor | 25 (0.00)  | 24 (0.25) | 0.67 |
| 11-03 | Gp4 | g.chr1:118583395C>A | Missense Mutation | SPAG17    | p.D1042Y | sperm associated antige  | 30 (0.00)  | 27 (0.26) | 0.69 |
| 11-03 | Gp4 | g.chr1:118642275G>A | Silent            | SPAG17    | p.H261H  | sperm associated antige  | 64 (0.00)  | 33 (0.21) | 0.57 |
| 11-03 | Gp4 | g.chr17:26911675G>A | Missense Mutation | SPAG5     | p.A719V  | sperm associated antige  | 44 (0.00)  | 30 (0.17) | 0.44 |
| 11-03 | Gp4 | g.chr9:40702756C>T  | Missense Mutation | SPATA31A3 | p.S138F  | SPATA31 subfamily A,     | 54 (0.00)  | 28 (0.18) | 0.48 |
| 11-03 | Gp4 | g.chr9:43625020G>T  | Missense Mutation | SPATA31A6 | p.H1223N | SPATA31 subfamily A,     | 159 (0.00) | 87 (0.16) | 0.43 |
| 11-03 | Gp4 | g.chr9:84608056G>T  | Nonsense Mutation | SPATA31D1 | p.E891*  | SPATA31 subfamily D,     | 24 (0.00)  | 49 (0.16) | 0.44 |
| 11-03 | Gp4 | g.chr15:97328261C>A | Nonsense Mutation | SPATA8    | p.S37*   | spermatogenesis associa  | 42 (0.00)  | 21 (0.43) | 1.14 |
| 11-03 | Gp4 | g.chr6:44344786C>T  | Missense Mutation | SPATS1    | p.P297S  | spermatogenesis associa  | 21 (0.00)  | 45 (0.16) | 0.41 |

|       |     |                      |                   |         |          |                                                        |            |      |
|-------|-----|----------------------|-------------------|---------|----------|--------------------------------------------------------|------------|------|
| 11-03 | Gp4 | g.chr22:24718338G>A  | Missense Mutation | SPECC1L | p.E464K  | sperm antigen with calp47 (0.02)                       | 29 (0.34)  | 0.92 |
| 11-03 | Gp4 | g.chr2:228883162C>A  | Missense Mutation | SPHKAP  | p.G803V  | SPHK1 interactor, AKA53 (0.02)                         | 17 (0.29)  | 0.78 |
| 11-03 | Gp4 | g.chr5:147693703T>A  | Missense Mutation | SPINK7  | p.I43N   | serine peptidase inhibitor 121 (0.00)                  | 109 (0.25) | 0.66 |
| 11-03 | Gp4 | g.chr17:47687919G>A  | Intron            | SPOP    |          | speckle-type POZ protein 65 (0.00)                     | 40 (0.23)  | 0.60 |
| 11-03 | Gp4 | g.chr17:47688813C>T  | Missense Mutation | SPOP    | p.V163I  | speckle-type POZ protein 76 (0.00)                     | 33 (0.15)  | 0.40 |
| 11-03 | Gp4 | g.chr17:47753836C>T  | Intron            | SPOP    |          | speckle-type POZ protein 39 (0.00)                     | 18 (0.28)  | 0.74 |
| 11-03 | Gp4 | g.chr12:53462013G>T  | Missense Mutation | SPRYD3  | p.R294S  | SPRY domain containing 64 (0.00)                       | 15 (0.47)  | 0.97 |
| 11-03 | Gp4 | g.chr1:158615088C>A  | Missense Mutation | SPTA1   | p.A1362S | spectrin, alpha, erythrocyte 19 (0.00)                 | 13 (0.46)  | 1.23 |
| 11-03 | Gp4 | g.chr2:54858518G>A   | Missense Mutation | SPTBN1  | p.D1112N | spectrin, beta, non-erythrocyte 55 (0.00)              | 17 (0.59)  | 1.57 |
| 11-03 | Gp4 | g.chr2:54891682C>A   | Silent            | SPTBN1  | p.T2171T | spectrin, beta, non-erythrocyte 22 (0.00)              | 10 (0.50)  | 1.33 |
| 11-03 | Gp4 | g.chr5:79617046C>T   | Missense Mutation | SPZ1    | p.L338F  | spermatogenic leucine zipper 55 (0.00)                 | 29 (0.21)  | 0.55 |
| 11-03 | Gp4 | g.chr2:45620101C>T   | Missense Mutation | SRBD1   | p.S894N  | S1 RNA binding domain 31 (0.00)                        | 31 (0.29)  | 0.77 |
| 11-03 | Gp4 | g.chr2:45826628C>G   | Missense Mutation | SRBD1   | p.S203T  | S1 RNA binding domain 41 (0.00)                        | 77 (0.23)  | 0.62 |
| 11-03 | Gp4 | g.chr5:65466776G>A   | Splice Site       | SREK1   |          | splicing regulatory glutathione 27 (0.00)              | 52 (0.46)  | 1.23 |
| 11-03 | Gp4 | g.chr6:35837309G>A   | Missense Mutation | SRPK1   | p.P454L  | SRSF protein kinase 1 84 (0.00)                        | 76 (0.20)  | 0.53 |
| 11-03 | Gp4 | g.chr1:24993341C>T   | Missense Mutation | SRRM1   | p.T555I  | serine/arginine repetitive matrix 17 (0.00)            | 23 (0.65)  | 1.74 |
| 11-03 | Gp4 | g.chr12:120901828C>A | Missense Mutation | SRSF9   | p.M149I  | serine/arginine-rich splicing factor 61 (0.00)         | 86 (0.14)  | 0.49 |
| 11-03 | Gp4 | g.chrX:48054258C>G   | Missense Mutation | SSX5    | p.E75D   | synovial sarcoma, X breakpoint 64 (0.00)               | 17 (0.47)  | 0.78 |
| 11-03 | Gp4 | g.chr8:53079547C>A   | Splice Site       | ST18    |          | suppression of tumorigenesis 27 (0.00)                 | 29 (0.24)  | 0.64 |
| 11-03 | Gp4 | g.chr1:44303918A>C   | Silent            | ST3GAL3 | p.A79A   | ST3 beta-galactoside alpha 79 (0.00)                   | 68 (0.32)  | 0.86 |
| 11-03 | Gp4 | g.chr12:57642566G>A  | Missense Mutation | STAC3   | p.R119C  | SH3 and cysteine rich domain 156 (0.01)                | 127 (0.28) | 0.94 |
| 11-03 | Gp4 | g.chrX:123164909C>T  | Silent            | STAG2   | p.H74H   | stromal antigen 2 38 (0.00)                            | 23 (0.57)  | 0.94 |
| 11-03 | Gp4 | g.chr7:99794865G>A   | Missense Mutation | STAG3   | p.S343N  | stromal antigen 3 36 (0.00)                            | 38 (0.26)  | 0.70 |
| 11-03 | Gp4 | g.chr13:33859651C>T  | Missense Mutation | STARD13 | p.S42N   | StAR-related lipid transfer 70 (0.00)                  | 27 (0.37)  | 0.39 |
| 11-03 | Gp4 | g.chr2:96859041T>A   | Missense Mutation | STARD7  | p.E200V  | StAR-related lipid transfer 55 (0.00)                  | 33 (0.48)  | 1.29 |
| 11-03 | Gp4 | g.chr15:42953376C>A  | Silent            | STARD9  | p.L241L  | StAR-related lipid transfer 21 (0.00)                  | 18 (0.67)  | 1.78 |
| 11-03 | Gp4 | g.chr20:47740955C>A  | Missense Mutation | STAU1   | p.R260L  | staufen double-stranded RNA binding protein 164 (0.00) | 32 (0.16)  | 0.42 |
| 11-03 | Gp4 | g.chr7:89859263G>A   | Missense Mutation | STEAP2  | p.M366I  | STEAP family member 23 (0.00)                          | 31 (0.39)  | 1.03 |
| 11-03 | Gp4 | g.chr1:47746327G>A   | Silent            | STIL    | p.N601N  | SCL/TAL1 interrupting sequence 24 (0.00)               | 19 (0.53)  | 1.40 |
| 11-03 | Gp4 | g.chr5:171481676C>A  | Missense Mutation | STK10   | p.R850M  | serine/threonine kinase 55 (0.00)                      | 24 (0.21)  | 0.56 |
| 11-03 | Gp4 | g.chr2:48809086G>T   | Silent            | STON1   | p.V438V  | stonin 1 37 (0.00)                                     | 33 (0.30)  | 0.81 |
| 11-03 | Gp4 | g.chr14:81744357C>T  | Missense Mutation | STON2   | p.R433K  | stonin 2 76 (0.00)                                     | 19 (0.74)  | 1.96 |
| 11-03 | Gp4 | g.chr7:129125652G>A  | Silent            | STRIP2  | p.E829E  | striatin interacting protein 26 (0.00)                 | 40 (0.15)  | 0.40 |
| 11-03 | Gp4 | g.chr11:125479349G>A | Missense Mutation | STT3A   | p.G328R  | STT3A, subunit of the Golgi 37 (0.00)                  | 19 (0.68)  | 1.82 |
| 11-03 | Gp4 | g.chr19:19114995G>T  | Missense Mutation | SUGP2   | p.L971I  | SURP and G patch domain 26 (0.00)                      | 39 (0.44)  | 1.16 |

|       |     |                     |                   |          |          |                           |               |           |      |
|-------|-----|---------------------|-------------------|----------|----------|---------------------------|---------------|-----------|------|
| 11-03 | Gp4 | g.chr8:70514018C>T  | Missense Mutation | SULF1    | p.R339C  | sulfatase 1               | 61 (0.02)     | 51 (0.16) | 0.42 |
| 11-03 | Gp4 | g.chr14:21831067C>A | Silent            | SUPT16H  | p.L517L  | suppressor of Ty 16 hon   | 31 (0.00)     | 36 (0.31) | 0.81 |
| 11-03 | Gp4 | g.chr14:21831107C>A | Splice Site       | SUPT16H  |          | suppressor of Ty 16 hon   | 33 (0.00)     | 34 (0.18) | 0.47 |
| 11-03 | Gp4 | g.chr17:56423627C>G | Missense Mutation | SUPT4H1  | p.D71H   | suppressor of Ty 4 hom    | 18 (0.00)     | 29 (0.24) | 0.64 |
| 11-03 | Gp4 | g.chr9:113166761G>T | Missense Mutation | SVEP1    | p.P3148H | sushi, von Willebrand f   | 33 (0.00)     | 73 (0.16) | 0.44 |
| 11-03 | Gp4 | g.chr9:113170331C>A | Nonsense Mutation | SVEP1    | p.G2494* | sushi, von Willebrand f   | 29 (0.00)     | 12 (0.42) | 1.11 |
| 11-03 | Gp4 | g.chr1:185191113C>T | Missense Mutation | SWT1     | p.H752Y  | SWT1 RNA endoribonu       | 64 (0.02)     | 62 (0.18) | 0.47 |
| 11-03 | Gp4 | g.chr6:10955381C>A  | Missense Mutation | SYCP2L   | p.Q663K  | synaptonemal complex      | 142 (0.00)    | 61 (0.28) | 0.74 |
| 11-03 | Gp4 | g.chr1:85648161G>C  | Missense Mutation | SYDE2    | p.R722G  | synapse defective 1, Rh   | 23 (0.00)     | 24 (0.21) | 0.56 |
| 11-03 | Gp4 | g.chr1:85648614G>A  | Missense Mutation | SYDE2    | p.H571Y  | synapse defective 1, Rh   | 103 (0.00)    | 63 (0.14) | 0.38 |
| 11-03 | Gp4 | g.chr6:152454486G>A | Silent            | SYNE1    | p.L8642L | spectrin repeat contain   | 38 (0.00)     | 81 (0.33) | 0.89 |
| 11-03 | Gp4 | g.chr6:152470649C>T | Missense Mutation | SYNE1    | p.R8202H | spectrin repeat contain   | 42 (0.00)     | 21 (0.29) | 0.76 |
| 11-03 | Gp4 | g.chr6:152651080C>A | Missense Mutation | SYNE1    | p.D4914Y | spectrin repeat contain   | 24 (0.00)     | 26 (0.27) | 0.72 |
| 11-03 | Gp4 | g.chr6:152665287G>A | Missense Mutation | SYNE1    | p.L4052F | spectrin repeat contain   | 42 (0.00)     | 41 (0.22) | 0.59 |
| 11-03 | Gp4 | g.chr14:64610501G>T | Missense Mutation | SYNE2    | p.M5023I | spectrin repeat contain   | 20 (0.00)     | 30 (0.20) | 0.53 |
| 11-03 | Gp4 | g.chr21:34014273C>T | Missense Mutation | SYNJ1    | p.R1213H | synaptojanin 1            | 15 (0.00)     | 48 (0.19) | 0.50 |
| 11-03 | Gp4 | g.chr14:70842449C>G | Missense Mutation | SYNJ2BP  | p.A81P   | synaptojanin 2 binding    | 130 (0.00)    | 47 (0.30) | 0.79 |
| 11-03 | Gp4 | g.chr5:150028147G>A | Missense Mutation | SYNPO    | p.V104I  | synaptopodin              | 65 (0.00)     | 24 (0.62) | 1.67 |
| 11-03 | Gp4 | g.chr6:132910619G>A | Silent            | TAAR5    | p.T69T   | trace amine associated r  | 60 (0.00)     | 30 (0.23) | 0.62 |
| 11-03 | Gp4 | g.chr17:61683795G>T | Missense Mutation | TACO1    | p.K170N  | translational activator   | of69 (0.00)   | 51 (0.16) | 0.42 |
| 11-03 | Gp4 | g.chr4:104510923G>C | Silent            | TACR3    | p.G438G  | tachykinin receptor 3     | 37 (0.00)     | 31 (0.35) | 0.95 |
| 11-03 | Gp4 | g.chr11:6632450C>T  | Silent            | TAF10    | p.T179T  | TAF10 RNA polymeras       | 44 (0.00)     | 25 (0.20) | 0.53 |
| 11-03 | Gp4 | g.chr1:222761874G>T | Missense Mutation | TAF1A    | p.P11H   | TATA box binding prot     | 33 (0.00)     | 29 (0.34) | 0.92 |
| 11-03 | Gp4 | g.chr9:32634324G>A  | Silent            | TAF1L    | p.D418D  | TAF1 RNA polymerase       | 31 (0.00)     | 32 (0.31) | 0.83 |
| 11-03 | Gp4 | g.chr9:32635303G>A  | Missense Mutation | TAF1L    | p.A92V   | TAF1 RNA polymerase       | 75 (0.00)     | 42 (0.17) | 0.44 |
| 11-03 | Gp4 | g.chr1:229730539G>T | Missense Mutation | TAF5L    | p.H425Q  | TAF5-like RNA polym       | 54 (0.00)     | 55 (0.15) | 0.39 |
| 11-03 | Gp4 | g.chr17:61483602G>A | Missense Mutation | TANC2    | p.G1111S | tetratricopeptide repe    | at, 45 (0.00) | 26 (0.31) | 0.82 |
| 11-03 | Gp4 | g.chr16:68961546C>G | Missense Mutation | TANGO6   | p.P735A  | transport and golgi org   | 36 (0.00)     | 24 (0.21) | 0.56 |
| 11-03 | Gp4 | g.chr7:122635565G>A | Silent            | TAS2R16  | p.L42L   | taste receptor, type 2, m | 16 (0.00)     | 10 (0.50) | 1.33 |
| 11-03 | Gp4 | g.chr7:141673310G>T | Silent            | TAS2R38  | p.L60L   | taste receptor, type 2, m | 50 (0.00)     | 33 (0.27) | 0.73 |
| 11-03 | Gp4 | g.chr12:11244090T>A | Missense Mutation | TAS2R43  | p.I247L  | taste receptor, type 2, m | 151 (0.00)    | 91 (0.21) | 0.70 |
| 11-03 | Gp4 | g.chr22:47308023C>A | Nonsense Mutation | TBC1D22A | p.Y318*  | TBC1 domain family, r     | 29 (0.00)     | 14 (0.36) | 0.95 |
| 11-03 | Gp4 | g.chr12:65268882G>A | Missense Mutation | TBC1D30  | p.A534T  | TBC1 domain family, r     | 59 (0.00)     | 59 (0.19) | 0.63 |
| 11-03 | Gp4 | g.chr2:101652523G>T | Silent            | TBC1D8   | p.G505G  | TBC1 domain family, r     | 53 (0.00)     | 38 (0.16) | 0.42 |
| 11-03 | Gp4 | g.chr4:141578934G>A | Silent            | TBC1D9   | p.L652L  | TBC1 domain family, r     | 65 (0.00)     | 52 (0.58) | 1.54 |

|       |     |                      |                   |          |          |                            |               |           |      |
|-------|-----|----------------------|-------------------|----------|----------|----------------------------|---------------|-----------|------|
| 11-03 | Gp4 | g.chr14:92251607C>G  | Missense Mutation | TC2N     | p.E421Q  | tandem C2 domains, nuc     | 18 (0.00)     | 20 (0.30) | 0.80 |
| 11-03 | Gp4 | g.chr3:44399328C>T   | Missense Mutation | TCAIM    | p.A42V   | T cell activation inhibito | 29 (0.00)     | 42 (0.14) | 0.38 |
| 11-03 | Gp4 | g.chr5:149755893G>T  | Splice Site       | TCOF1    | p.Q714H  | Treacher Collins-France    | 42 (0.00)     | 32 (0.19) | 0.50 |
| 11-03 | Gp4 | g.chr6:46657044C>T   | Silent            | TDRD6    | p.V393V  | tudor domain containing    | 28 (0.00)     | 37 (0.16) | 0.43 |
| 11-03 | Gp4 | g.chr6:46657276G>A   | Missense Mutation | TDRD6    | p.E471K  | tudor domain containing    | 53 (0.00)     | 26 (0.19) | 0.51 |
| 11-03 | Gp4 | g.chr9:100243214C>A  | Missense Mutation | TDRD7    | p.S802R  | tudor domain containing    | 79 (0.00)     | 34 (0.21) | 0.55 |
| 11-03 | Gp4 | g.chr4:183675778G>A  | Missense Mutation | TENM3    | p.E1420K | teneurin transmembrane     | 50 (0.00)     | 36 (0.28) | 0.74 |
| 11-03 | Gp4 | g.chr4:183713840C>A  | Missense Mutation | TENM3    | p.F2005L | teneurin transmembrane     | 121 (0.00)    | 76 (0.14) | 0.39 |
| 11-03 | Gp4 | g.chr11:78380714G>A  | Silent            | TENM4    | p.L2226L | teneurin transmembrane     | 70 (0.00)     | 51 (0.20) | 0.52 |
| 11-03 | Gp4 | g.chr11:78412725G>A  | Missense Mutation | TENM4    | p.P1645S | teneurin transmembrane     | 16 (0.00)     | 23 (0.39) | 1.04 |
| 11-03 | Gp4 | g.chr14:20841282G>A  | Missense Mutation | TEP1     | p.S2172F | telomerase-associated p    | 19 (0.00)     | 24 (0.25) | 0.67 |
| 11-03 | Gp4 | g.chr5:1282571C>T    | Nonsense Mutation | TERT     | p.W581*  | telomerase reverse trans   | 21 (0.00)     | 32 (0.19) | 0.50 |
| 11-03 | Gp4 | g.chr7:115891853C>A  | Missense Mutation | TES      | p.P248T  | testis derived transcript  | 63 (0.02)     | 31 (0.48) | 1.29 |
| 11-03 | Gp4 | g.chr4:106196661A>G  | Missense Mutation | TET2     | p.D1665G | tet methylcytosine dioxy   | 48 (0.00)     | 61 (0.15) | 0.39 |
| 11-03 | Gp4 | g.chr19:43920655C>T  | Silent            | TEX101   | p.F131F  | testis expressed           | 101 46 (0.00) | 73 (0.15) | 0.40 |
| 11-03 | Gp4 | g.chr17:56690796C>A  | Missense Mutation | TEX14    | p.V337F  | testis expressed           | 14 41 (0.00)  | 44 (0.18) | 0.48 |
| 11-03 | Gp4 | g.chr15:39885733C>A  | Missense Mutation | THBS1    | p.T1044N | thrombospondin 1           | 22 (0.00)     | 19 (0.37) | 0.98 |
| 11-03 | Gp4 | g.chr17:38240965C>A  | Missense Mutation | THRA     | p.P158Q  | thyroid hormone recepto    | 22 (0.00)     | 15 (0.47) | 1.24 |
| 11-03 | Gp4 | g.chr1:36766534C>T   | Missense Mutation | THRAP3   | p.S784F  | thyroid hormone recepto    | 36 (0.00)     | 17 (0.29) | 0.78 |
| 11-03 | Gp4 | g.chr1:36767216C>T   | Silent            | THRAP3   | p.N855N  | thyroid hormone recepto    | 41 (0.00)     | 42 (0.24) | 0.63 |
| 11-03 | Gp4 | g.chr7:11450854C>T   | Missense Mutation | THSD7A   | p.D1260N | thrombospondin, type I,    | 70 (0.00)     | 23 (0.48) | 1.28 |
| 11-03 | Gp4 | g.chr3:9425899G>T    | Missense Mutation | THUMPD3  | p.M413I  | THUMP domain containi      | 32 (0.00)     | 30 (0.33) | 0.89 |
| 11-03 | Gp4 | g.chr11:134118811G>T | Missense Mutation | THYN1    | p.L175M  | thymocyte nuclear prote    | 42 (0.00)     | 22 (0.41) | 1.09 |
| 11-03 | Gp4 | g.chr10:121337234A>T | Missense Mutation | TIAL1    | p.L191M  | TIA1 cytotoxic granule-    | 24 (0.00)     | 55 (0.15) | 0.39 |
| 11-03 | Gp4 | g.chr10:121342065G>A | Missense Mutation | TIAL1    | p.T45I   | TIA1 cytotoxic granule-    | 47 (0.00)     | 38 (0.18) | 0.49 |
| 11-03 | Gp4 | g.chr15:90164642C>A  | Missense Mutation | TICRR    | p.P1058Q | TOPBP1-interacting che     | 17 (0.00)     | 30 (0.17) | 0.44 |
| 11-03 | Gp4 | g.chr14:24711417A>G  | Missense Mutation | TINF2    | p.L41P   | TERF1 (TRF1)-interacti     | 37 (0.00)     | 33 (0.18) | 0.48 |
| 11-03 | Gp4 | g.chr8:38851085C>T   | Missense Mutation | TM2D2    | p.R137Q  | TM2 domain containing      | 40 (0.00)     | 40 (0.17) | 0.47 |
| 11-03 | Gp4 | g.chr5:140023479C>T  | Missense Mutation | TMCO6    | p.L345F  | transmembrane and coil     | 46 (0.00)     | 27 (0.22) | 0.59 |
| 11-03 | Gp4 | g.chr17:41368746G>T  | Missense Mutation | TMEM106A | p.D201Y  | transmembrane protein      | 25 (0.00)     | 45 (0.18) | 0.47 |
| 11-03 | Gp4 | g.chr12:122199564C>T | Silent            | TMEM120B | p.D157D  | transmembrane protein      | 31 (0.00)     | 29 (0.17) | 0.61 |
| 11-03 | Gp4 | g.chr4:159162717C>A  | Missense Mutation | TMEM144  | p.H287N  | transmembrane protein      | 17 (0.00)     | 16 (0.31) | 0.83 |
| 11-03 | Gp4 | g.chr19:42824525C>A  | Missense Mutation | TMEM145  | p.A377D  | transmembrane protein      | 37 (0.00)     | 21 (0.33) | 0.89 |
| 11-03 | Gp4 | g.chr2:135470831C>A  | Missense Mutation | TMEM163  | p.K87N   | transmembrane protein      | 50 (0.02)     | 34 (0.18) | 0.47 |
| 11-03 | Gp4 | g.chr7:112424037C>T  | Missense Mutation | TMEM168  | p.A282T  | transmembrane protein      | 90 (0.00)     | 43 (0.23) | 0.62 |

|       |     |                      |                   |          |          |                                                            |            |           |      |
|-------|-----|----------------------|-------------------|----------|----------|------------------------------------------------------------|------------|-----------|------|
| 11-03 | Gp4 | g.chr12:72091068A>T  | Missense Mutation | TMEM19   | p.R131W  | transmembrane protein 42                                   | 42 (0.00)  | 68 (0.15) | 0.49 |
| 11-03 | Gp4 | g.chr12:72094693A>G  | Missense Mutation | TMEM19   | p.N310S  | transmembrane protein 30                                   | 30 (0.00)  | 28 (0.18) | 0.60 |
| 11-03 | Gp4 | g.chr2:27259420G>T   | Silent            | TMEM214  | p.L262L  | transmembrane protein 19                                   | 19 (0.00)  | 15 (0.67) | 1.78 |
| 11-03 | Gp4 | g.chr14:93652710C>A  | Silent            | TMEM251  | p.I30I   | transmembrane protein 44                                   | 44 (0.00)  | 55 (0.38) | 1.02 |
| 11-03 | Gp4 | g.chr13:114472128C>T | Nonsense Mutation | TMEM255B | p.Q83*   | transmembrane protein 27                                   | 27 (0.00)  | 28 (0.21) | 0.57 |
| 11-03 | Gp4 | g.chr14:57114023C>T  | Silent            | TMEM260  | p.A644A  | transmembrane protein 16                                   | 16 (0.00)  | 18 (0.44) | 1.19 |
| 11-03 | Gp4 | g.chr1:25667001G>T   | Missense Mutation | TMEM50A  | p.L8F    | transmembrane protein 23                                   | 23 (0.04)  | 35 (0.20) | 0.53 |
| 11-03 | Gp4 | g.chr17:28656279C>A  | Silent            | TMIGD1   | p.L117L  | transmembrane and immunoglobulin-like domain containing 31 | 31 (0.00)  | 27 (0.19) | 0.49 |
| 11-03 | Gp4 | g.chr9:100328187G>C  | Missense Mutation | TMOD1    | p.V226L  | tropomodulin 1                                             | 86 (0.00)  | 38 (0.18) | 0.49 |
| 11-03 | Gp4 | g.chr9:100328208G>T  | Missense Mutation | TMOD1    | p.G233W  | tropomodulin 1                                             | 83 (0.00)  | 34 (0.24) | 0.63 |
| 11-03 | Gp4 | g.chr21:42877835C>A  | Intron            | TMPRSS2  |          | transmembrane protease 92                                  | 92 (0.00)  | 21 (0.29) | 0.76 |
| 11-03 | Gp4 | g.chr20:7963035C>T   | Missense Mutation | TMX4     | p.D305N  | thioredoxin-related transmembrane protein 37               | 37 (0.00)  | 17 (0.71) | 1.88 |
| 11-03 | Gp4 | g.chr9:117792566G>A  | Silent            | TNC      | p.F1831F | tenascin C                                                 | 19 (0.00)  | 32 (0.16) | 0.42 |
| 11-03 | Gp4 | g.chr1:175097746C>T  | Missense Mutation | TNN      | p.P1065L | tenascin N                                                 | 45 (0.02)  | 20 (0.30) | 0.80 |
| 11-03 | Gp4 | g.chr7:5410015C>G    | Missense Mutation | TNRC18   | p.E1404Q | trinucleotide repeat containing 26                         | 26 (0.00)  | 25 (0.24) | 0.64 |
| 11-03 | Gp4 | g.chr17:48940405A>G  | Missense Mutation | TOB1     | p.L325S  | transducer of ERBB2, 1                                     | 39 (0.00)  | 29 (0.21) | 0.55 |
| 11-03 | Gp4 | g.chr1:45808296G>T   | Nonsense Mutation | TOE1     | p.E245*  | target of EGR1, member 100                                 | 100 (0.00) | 55 (0.15) | 0.39 |
| 11-03 | Gp4 | g.chr17:18196150G>A  | Nonsense Mutation | TOP3A    | p.R364*  | topoisomerase (DNA) II                                     | 36 (0.00)  | 35 (0.17) | 0.46 |
| 11-03 | Gp4 | g.chr14:21963531G>A  | Silent            | TOX4     | p.E595E  | TOX high mobility group box domain containing 42           | 42 (0.00)  | 35 (0.26) | 0.69 |
| 11-03 | Gp4 | g.chr2:24305964G>A   | Missense Mutation | TP53I3   | p.S66F   | tumor protein p53 inducible 18                             | 18 (0.00)  | 12 (0.42) | 1.11 |
| 11-03 | Gp4 | g.chr3:188925348C>A  | Missense Mutation | TPRG1    | p.Q59K   | tumor protein p63 regulator 64                             | 64 (0.00)  | 51 (0.16) | 0.42 |
| 11-03 | Gp4 | g.chr13:25517100G>A  | RNA               | TPTE2P1  |          | transmembrane phosphatase 17                               | 17 (0.00)  | 16 (0.50) | 1.33 |
| 11-03 | Gp4 | g.chr5:64960394G>A   | Missense Mutation | TRAPPC13 | p.A404T  | trafficking protein particle 24                            | 24 (0.00)  | 19 (0.37) | 0.98 |
| 11-03 | Gp4 | g.chr14:22521090C>T  | RNA               | TRAV21   |          | T cell receptor alpha variable 23                          | 23 (0.00)  | 14 (0.36) | 0.95 |
| 11-03 | Gp4 | g.chr14:22690331C>A  | RNA               | TRAV35   |          | T cell receptor alpha variable 18                          | 18 (0.00)  | 28 (0.29) | 0.76 |
| 11-03 | Gp4 | g.chr14:22237226G>A  | RNA               | TRAV6    |          | T cell receptor alpha variable 37                          | 37 (0.00)  | 38 (0.32) | 0.84 |
| 11-03 | Gp4 | g.chr7:142326966G>A  | RNA               | TRBV19   |          | T cell receptor beta variable 23                           | 23 (0.00)  | 48 (0.23) | 0.61 |
| 11-03 | Gp4 | g.chr7:142124187C>T  | RNA               | TRBV6-8  |          | T cell receptor beta variable 30                           | 30 (0.00)  | 36 (0.25) | 0.67 |
| 11-03 | Gp4 | g.chr14:22938138G>T  | RNA               | TRDV3    |          | T cell receptor delta variable 36                          | 36 (0.00)  | 46 (0.22) | 0.58 |
| 11-03 | Gp4 | g.chr6:42211020C>T   | Missense Mutation | TRERF1   | p.R942Q  | transcriptional regulator 52                               | 52 (0.00)  | 52 (0.17) | 0.46 |
| 11-03 | Gp4 | g.chr1:114948139T>A  | Missense Mutation | TRIM33   | p.E887D  | tripartite motif containing 78                             | 78 (0.00)  | 64 (0.22) | 0.58 |
| 11-03 | Gp4 | g.chr11:89768629C>G  | Missense Mutation | TRIM49C  | p.L84V   | tripartite motif containing 49                             | 49 (0.00)  | 18 (0.61) | 1.63 |
| 11-03 | Gp4 | g.chr11:4621699C>T   | Missense Mutation | TRIM68   | p.R422Q  | tripartite motif containing 21                             | 21 (0.00)  | 15 (0.47) | 1.24 |
| 11-03 | Gp4 | g.chr15:45050887C>T  | Silent            | TRIM69   | p.S216S  | tripartite motif containing 29                             | 29 (0.00)  | 26 (0.23) | 0.62 |
| 11-03 | Gp4 | g.chr10:104414439G>A | Silent            | TRIM8    | p.L200L  | tripartite motif containing 73                             | 73 (0.00)  | 20 (0.25) | 0.67 |

|       |     |                     |                   |         |           |                                      |           |      |
|-------|-----|---------------------|-------------------|---------|-----------|--------------------------------------|-----------|------|
| 11-03 | Gp4 | g.chr4:189067980G>A | Silent            | TRIML1  | p.E287E   | tripartite motif family-li 32 (0.00) | 35 (0.31) | 0.84 |
| 11-03 | Gp4 | g.chr4:189068050G>T | Missense Mutation | TRIML1  | p.G311W   | tripartite motif family-li 26 (0.00) | 37 (0.16) | 0.43 |
| 11-03 | Gp4 | g.chr9:37763717C>T  | Silent            | TRMT10B | p.I129I   | tRNA methyltransferase 37 (0.00)     | 28 (0.25) | 0.67 |
| 11-03 | Gp4 | g.chr8:125463850G>A | Missense Mutation | TRMT12  | p.V228M   | tRNA methyltransferase 51 (0.00)     | 33 (0.15) | 0.40 |
| 11-03 | Gp4 | g.chrX:100297166C>T | Missense Mutation | TRMT2B  | p.G38E    | tRNA methyltransferase 15 (0.00)     | 16 (0.31) | 0.52 |
| 11-03 | Gp4 | g.chr22:46746318C>T | Silent            | TRMU    | p.I203I   | tRNA 5-methylaminom 29 (0.00)        | 29 (0.17) | 0.46 |
| 11-03 | Gp4 | g.chr4:122846224G>A | Silent            | TRPC3   | p.H375H   | transient receptor potent 36 (0.00)  | 78 (0.21) | 0.55 |
| 11-03 | Gp4 | g.chr9:73442842C>A  | Silent            | TRPM3   | p.G298G   | transient receptor potent 89 (0.00)  | 37 (0.16) | 0.43 |
| 11-03 | Gp4 | g.chr9:77431673G>C  | Nonsense Mutation | TRPM6   | p.S407*   | transient receptor potent 38 (0.00)  | 23 (0.22) | 0.58 |
| 11-03 | Gp4 | g.chr7:130364041C>A | Missense Mutation | TSGA13  | p.K113N   | testis specific, 13 63 (0.00)        | 30 (0.17) | 0.44 |
| 11-03 | Gp4 | g.chr1:115576739G>A | Missense Mutation | TSHB    | p.C103Y   | thyroid stimulating horn 34 (0.00)   | 17 (0.29) | 0.78 |
| 11-03 | Gp4 | g.chr12:58140819C>T | Missense Mutation | TSPAN31 | p.P72S    | tetraspanin 31 16 (0.00)             | 22 (0.55) | 1.81 |
| 11-03 | Gp4 | g.chr4:99407933C>A  | Missense Mutation | TSPAN5  | p.G79W    | tetraspanin 5 17 (0.00)              | 15 (0.33) | 0.89 |
| 11-03 | Gp4 | g.chr8:98288847G>A  | Missense Mutation | TSPYL5  | p.T409I   | TSPY-like 5 45 (0.00)                | 81 (0.20) | 0.53 |
| 11-03 | Gp4 | g.chr17:2235492G>A  | Silent            | TSR1    | p.D489D   | TSR1, 20S rRNA accun 43 (0.00)       | 24 (0.38) | 1.00 |
| 11-03 | Gp4 | g.chr17:2235560C>T  | Missense Mutation | TSR1    | p.A467T   | TSR1, 20S rRNA accun 23 (0.00)       | 23 (0.22) | 0.58 |
| 11-03 | Gp4 | g.chr17:2236288C>A  | Missense Mutation | TSR1    | p.M424I   | TSR1, 20S rRNA accun 55 (0.00)       | 35 (0.20) | 0.53 |
| 11-03 | Gp4 | g.chr17:2238877C>T  | Missense Mutation | TSR1    | p.G117R   | TSR1, 20S rRNA accun 61 (0.00)       | 40 (0.15) | 0.40 |
| 11-03 | Gp4 | g.chr22:28379296G>A | Missense Mutation | TTC28   | p.S2120L  | tetratricopeptide repeat 18 (0.00)   | 22 (0.32) | 0.85 |
| 11-03 | Gp4 | g.chr21:38537934G>T | Nonsense Mutation | TTC3    | p.E1140*  | tetratricopeptide repeat 23 (0.00)   | 24 (0.50) | 1.33 |
| 11-03 | Gp4 | g.chr21:38538512G>A | Silent            | TTC3    | p.P1332P  | tetratricopeptide repeat 19 (0.00)   | 43 (0.16) | 0.43 |
| 11-03 | Gp4 | g.chr2:178416190G>A | Silent            | TTC30B  | p.Y434Y   | tetratricopeptide repeat 180 (0.00)  | 92 (0.21) | 0.55 |
| 11-03 | Gp4 | g.chr5:94830422G>A  | Silent            | TTC37   | p.L1256L  | tetratricopeptide repeat 51 (0.00)   | 39 (0.21) | 0.55 |
| 11-03 | Gp4 | g.chr18:21662959G>T | Missense Mutation | TTC39C  | p.A300S   | tetratricopeptide repeat 46 (0.02)   | 78 (0.15) | 0.41 |
| 11-03 | Gp4 | g.chr9:135273583C>T | Silent            | TTF1    | p.E574E   | transcription terminator 39 (0.00)   | 40 (0.23) | 0.60 |
| 11-03 | Gp4 | g.chr9:135277901G>A | Missense Mutation | TTF1    | p.T103I   | transcription terminator 21 (0.00)   | 16 (0.38) | 1.00 |
| 11-03 | Gp4 | g.chr1:117617987C>G | Missense Mutation | TTF2    | p.L261V   | transcription terminator 87 (0.00)   | 39 (0.18) | 0.48 |
| 11-03 | Gp4 | g.chr2:179393363G>T | Silent            | TTN     | p.I35705I | titin 37 (0.00)                      | 34 (0.15) | 0.39 |
| 11-03 | Gp4 | g.chr2:179393441G>T | Missense Mutation | TTN     | p.S35679R | titin 46 (0.00)                      | 46 (0.15) | 0.41 |
| 11-03 | Gp4 | g.chr2:179400994G>A | Nonsense Mutation | TTN     | p.Q33494* | titin 30 (0.00)                      | 15 (0.47) | 1.24 |
| 11-03 | Gp4 | g.chr2:179402363G>T | Missense Mutation | TTN     | p.Q33191K | titin 63 (0.00)                      | 61 (0.28) | 0.74 |
| 11-03 | Gp4 | g.chr2:179404928G>A | Silent            | TTN     | p.T32655T | titin 100 (0.00)                     | 75 (0.15) | 0.39 |
| 11-03 | Gp4 | g.chr2:179407811C>A | Missense Mutation | TTN     | p.V32297L | titin 121 (0.00)                     | 83 (0.14) | 0.39 |
| 11-03 | Gp4 | g.chr2:179428233G>T | Missense Mutation | TTN     | p.F27542L | titin 46 (0.00)                      | 47 (0.21) | 0.57 |
| 11-03 | Gp4 | g.chr2:179432459G>A | Missense Mutation | TTN     | p.R26134C | titin 62 (0.02)                      | 17 (0.35) | 0.94 |



|       |     |                      |                   |             |           |                             |            |            |      |
|-------|-----|----------------------|-------------------|-------------|-----------|-----------------------------|------------|------------|------|
| 11-03 | Gp4 | g.chr2:179443583C>A  | Missense Mutation | TTN         | p.G22725V | titin                       | 44 (0.00)  | 31 (0.19)  | 0.52 |
| 11-03 | Gp4 | g.chr2:179443623T>A  | Missense Mutation | TTN         | p.M22712L | titin                       | 37 (0.00)  | 19 (0.32)  | 0.84 |
| 11-03 | Gp4 | g.chr2:179449396C>T  | Splice Site       | TTN         | p.G21658S | titin                       | 43 (0.00)  | 20 (0.30)  | 0.80 |
| 11-03 | Gp4 | g.chr2:179449634G>A  | Silent            | TTN         | p.S21578S | titin                       | 45 (0.00)  | 19 (0.26)  | 0.70 |
| 11-03 | Gp4 | g.chr2:179451950G>T  | Missense Mutation | TTN         | p.L21330I | titin                       | 58 (0.00)  | 15 (0.40)  | 1.07 |
| 11-03 | Gp4 | g.chr2:179458844C>A  | Missense Mutation | TTN         | p.D19426Y | titin                       | 86 (0.00)  | 38 (0.18)  | 0.49 |
| 11-03 | Gp4 | g.chr2:179469497C>A  | Missense Mutation | TTN         | p.A18107S | titin                       | 43 (0.00)  | 46 (0.20)  | 0.52 |
| 11-03 | Gp4 | g.chr2:179469611G>A  | Missense Mutation | TTN         | p.P18069S | titin                       | 49 (0.00)  | 17 (0.29)  | 0.78 |
| 11-03 | Gp4 | g.chr2:179486352C>T  | Missense Mutation | TTN         | p.D15067N | titin                       | 50 (0.00)  | 23 (0.39)  | 1.04 |
| 11-03 | Gp4 | g.chr2:179495647G>A  | Missense Mutation | TTN         | p.P14680S | titin                       | 52 (0.00)  | 26 (0.19)  | 0.51 |
| 11-03 | Gp4 | g.chr2:179500819C>T  | Missense Mutation | TTN         | p.V13827M | titin                       | 173 (0.00) | 117 (0.19) | 0.50 |
| 11-03 | Gp4 | g.chr2:179528367G>T  | Silent            | TTN         | p.V12173V | titin                       | 134 (0.00) | 29 (0.31)  | 0.83 |
| 11-03 | Gp4 | g.chr2:179588780C>A  | Missense Mutation | TTN         | p.G7069V  | titin                       | 53 (0.00)  | 30 (0.17)  | 0.44 |
| 11-03 | Gp4 | g.chr2:179589157T>A  | Missense Mutation | TTN         | p.Y6982F  | titin                       | 45 (0.00)  | 37 (0.16)  | 0.43 |
| 11-03 | Gp4 | g.chr2:179594138C>A  | Missense Mutation | TTN         | p.D6249Y  | titin                       | 89 (0.00)  | 54 (0.17)  | 0.44 |
| 11-03 | Gp4 | g.chr2:179605503G>A  | Nonsense Mutation | TTN         | p.Q4153*  | titin                       | 80 (0.00)  | 60 (0.20)  | 0.53 |
| 11-03 | Gp4 | g.chr2:179605980C>T  | Missense Mutation | TTN         | p.G3994R  | titin                       | 45 (0.00)  | 50 (0.20)  | 0.53 |
| 11-03 | Gp4 | g.chr12:49578862C>T  | Silent            | TUBA1A      | p.E429E   | tubulin, alpha 1a           | 71 (0.00)  | 42 (0.33)  | 1.12 |
| 11-03 | Gp4 | g.chr19:6495435G>A   | Missense Mutation | TUBB4A      | p.R359C   | tubulin, beta 4A class IV53 | 64 (0.00)  | 64 (0.47)  | 1.59 |
| 11-03 | Gp4 | g.chr9:140137868G>A  | Missense Mutation | TUBB4B      | p.G400S   | tubulin, beta 4B class IV66 | 66 (0.00)  | 37 (0.32)  | 0.86 |
| 11-03 | Gp4 | g.chr15:22868844C>T  | Silent            | TUBGCP5     | p.L906L   | tubulin, gamma comple       | 17 (0.00)  | 42 (0.14)  | 0.38 |
| 11-03 | Gp4 | g.chr22:31367706C>G  | RNA               | TUG1        |           | taurine up-regulated 1 (r   | 68 (0.01)  | 60 (0.27)  | 0.71 |
| 11-03 | Gp4 | g.chr22:31367707T>A  | RNA               | TUG1        |           | taurine up-regulated 1 (r   | 67 (0.01)  | 60 (0.27)  | 0.71 |
| 11-03 | Gp4 | g.chr17:15457102C>T  | Missense Mutation | TVP23C-CDR' | p.S46N    | TVP23C-CDRT4 readth         | 25 (0.00)  | 22 (0.36)  | 0.97 |
| 11-03 | Gp4 | g.chr7:66479428G>T   | Missense Mutation | TYW1        | p.W150C   | tRNA-yW synthesizing        | 24 (0.00)  | 22 (0.59)  | 1.58 |
| 11-03 | Gp4 | g.chr7:66514974C>A   | Missense Mutation | TYW1        | p.F341L   | tRNA-yW synthesizing        | 79 (0.00)  | 26 (0.19)  | 0.51 |
| 11-03 | Gp4 | g.chr7:66703390C>T   | Silent            | TYW1        | p.F691F   | tRNA-yW synthesizing        | 69 (0.00)  | 23 (0.26)  | 0.70 |
| 11-03 | Gp4 | g.chr7:72081723C>T   | RNA               | TYW1B       |           | tRNA-yW synthesizing        | 100 (0.00) | 95 (0.20)  | 0.53 |
| 11-03 | Gp4 | g.chr15:70959420G>T  | Silent            | UACA        | p.V1201V  | uveal autoantigen with c    | 42 (0.00)  | 29 (0.24)  | 0.64 |
| 11-03 | Gp4 | g.chr17:16285519G>A  | Missense Mutation | UBB         | p.E100K   | ubiquitin B                 | 80 (0.00)  | 24 (0.33)  | 0.89 |
| 11-03 | Gp4 | g.chr12:109967718C>G | Missense Mutation | UBE3B       | p.A884G   | ubiquitin protein ligase    | 134 (0.00) | 35 (0.20)  | 0.70 |
| 11-03 | Gp4 | g.chr11:118247296C>T | Silent            | UBE4A       | p.D493D   | ubiquitination factor E4.   | 32 (0.00)  | 11 (0.55)  | 1.45 |
| 11-03 | Gp4 | g.chr1:10190817G>A   | Silent            | UBE4B       | p.L490L   | ubiquitination factor E4.   | 111 (0.00) | 68 (0.15)  | 0.39 |
| 11-03 | Gp4 | g.chr15:74751182C>T  | Silent            | UBL7        | p.A9A     | ubiquitin-like 7            | 21 (0.00)  | 27 (0.81)  | 2.17 |
| 11-03 | Gp4 | g.chr16:4924934C>A   | Silent            | UBN1        | p.L841L   | ubinnuclein 1               | 53 (0.00)  | 23 (0.22)  | 0.58 |

|       |     |                      |                   |          |          |                                     |           |      |
|-------|-----|----------------------|-------------------|----------|----------|-------------------------------------|-----------|------|
| 11-03 | Gp4 | g.chr6:42541549G>T   | Missense Mutation | UBR2     | p.R52S   | ubiquitin protein ligase 121 (0.00) | 30 (0.17) | 0.44 |
| 11-03 | Gp4 | g.chr6:42625836G>A   | Missense Mutation | UBR2     | p.E983K  | ubiquitin protein ligase 176 (0.00) | 78 (0.14) | 0.38 |
| 11-03 | Gp4 | g.chr1:19440262G>T   | Silent            | UBR4     | p.I3796I | ubiquitin protein ligase 147 (0.00) | 29 (0.24) | 0.64 |
| 11-03 | Gp4 | g.chr1:19443787G>A   | Missense Mutation | UBR4     | p.T3584I | ubiquitin protein ligase 153 (0.00) | 41 (0.24) | 0.65 |
| 11-03 | Gp4 | g.chr1:19504110C>A   | Missense Mutation | UBR4     | p.A828S  | ubiquitin protein ligase 119 (0.00) | 40 (0.25) | 0.67 |
| 11-03 | Gp4 | g.chr2:234602464G>A  | Missense Mutation | UGT1A6   | p.V272I  | UDP glucuronosyltransf20 (0.00)     | 17 (0.47) | 1.25 |
| 11-03 | Gp4 | g.chr4:69962496G>A   | Silent            | UGT2B7   | p.L86L   | UDP glucuronosyltransf45 (0.00)     | 30 (0.17) | 0.44 |
| 11-03 | Gp4 | g.chr5:176370393G>A  | Missense Mutation | UIMC1    | p.P514S  | ubiquitin interaction mo 39 (0.00)  | 36 (0.42) | 1.11 |
| 11-03 | Gp4 | g.chr17:19699416C>T  | Silent            | ULK2     | p.V663V  | unc-51 like autophagy a 31 (0.00)   | 22 (0.41) | 1.09 |
| 11-03 | Gp4 | g.chr3:41723082C>A   | Missense Mutation | ULK4     | p.Q965H  | unc-51 like kinase 4 27 (0.00)      | 29 (0.24) | 0.64 |
| 11-03 | Gp4 | g.chr12:121154526C>T | Missense Mutation | UNC119B  | p.R152W  | unc-119 homolog B (C. 45 (0.00)     | 56 (0.11) | 0.38 |
| 11-03 | Gp4 | g.chr15:54916037C>T  | Missense Mutation | UNC13C   | p.R2082C | unc-13 homolog C (C. e49 (0.00)     | 45 (0.18) | 0.47 |
| 11-03 | Gp4 | g.chr14:94060027C>T  | Splice Site       | UNC79    | p.L835L  | unc-79 homolog (C. eleç20 (0.00)    | 38 (0.16) | 0.42 |
| 11-03 | Gp4 | g.chr2:210642204G>A  | Missense Mutation | UNC80    | p.R174Q  | unc-80 homolog (C. eleç33 (0.00)    | 19 (0.26) | 0.70 |
| 11-03 | Gp4 | g.chr16:21973784G>A  | Silent            | UQCRC2   | p.V112V  | ubiquinol-cytochrome c 19 (0.00)    | 30 (0.17) | 0.44 |
| 11-03 | Gp4 | g.chr1:229772491G>A  | Missense Mutation | URB2     | p.G711S  | URB2 ribosome biogenç24 (0.00)      | 30 (0.17) | 0.44 |
| 11-03 | Gp4 | g.chr4:9212935C>A    | Missense Mutation | USP17L10 | p.R185S  | ubiquitin specific peptid30 (0.00)  | 23 (0.26) | 0.70 |
| 11-03 | Gp4 | g.chr4:9212940C>G    | Missense Mutation | USP17L10 | p.H186Q  | ubiquitin specific peptid37 (0.00)  | 24 (0.25) | 0.67 |
| 11-03 | Gp4 | g.chr22:18650050G>A  | Silent            | USP18    | p.L143L  | ubiquitin specific peptid44 (0.02)  | 48 (0.23) | 0.61 |
| 11-03 | Gp4 | g.chr1:55638148C>A   | Nonsense Mutation | USP24    | p.E202*  | ubiquitin specific peptid 16 (0.00) | 28 (0.43) | 1.14 |
| 11-03 | Gp4 | g.chr1:55638157C>A   | Nonsense Mutation | USP24    | p.E199*  | ubiquitin specific peptid 16 (0.00) | 28 (0.18) | 0.48 |
| 11-03 | Gp4 | g.chr11:113688453C>T | Missense Mutation | USP28    | p.E464K  | ubiquitin specific peptid58 (0.00)  | 32 (0.19) | 0.50 |
| 11-03 | Gp4 | g.chr11:77919943G>A  | Nonsense Mutation | USP35    | p.W509*  | ubiquitin specific peptid31 (0.00)  | 17 (0.53) | 1.41 |
| 11-03 | Gp4 | g.chr3:49336052G>T   | Missense Mutation | USP4     | p.P510Q  | ubiquitin specific peptid98 (0.00)  | 28 (0.21) | 0.57 |
| 11-03 | Gp4 | g.chr11:11962038T>A  | Silent            | USP47    | p.R772R  | ubiquitin specific peptid34 (0.00)  | 31 (0.16) | 0.43 |
| 11-03 | Gp4 | g.chrX:55514614G>T   | Silent            | USP51    | p.V253V  | ubiquitin specific peptid27 (0.00)  | 26 (0.46) | 0.77 |
| 11-03 | Gp4 | g.chr10:75283430C>T  | Missense Mutation | USP54    | p.R758Q  | ubiquitin specific peptid61 (0.00)  | 33 (0.27) | 0.73 |
| 11-03 | Gp4 | g.chr10:11505380G>A  | Missense Mutation | USP6NL   | p.A516V  | USP6 N-terminal like 49 (0.00)      | 22 (0.27) | 0.73 |
| 11-03 | Gp4 | g.chr15:50782625C>T  | Silent            | USP8     | p.L607L  | ubiquitin specific peptid20 (0.00)  | 13 (0.38) | 1.03 |
| 11-03 | Gp4 | g.chr11:75562985C>T  | Missense Mutation | UVRAG    | p.H59Y   | UV radiation resistance 29 (0.00)   | 36 (0.22) | 0.59 |
| 11-03 | Gp4 | g.chr2:106761800G>T  | Silent            | UXS1     | p.G106G  | UDP-glucuronate decarl32 (0.00)     | 20 (0.40) | 1.07 |
| 11-03 | Gp4 | g.chr17:41168090C>T  | Silent            | VAT1     | p.E256E  | vesicle amine transport 47 (0.00)   | 21 (0.29) | 0.76 |
| 11-03 | Gp4 | g.chr19:6833627C>A   | Missense Mutation | VAV1     | p.H567N  | vav 1 guanine nucleotid22 (0.00)    | 35 (0.14) | 0.38 |
| 11-03 | Gp4 | g.chr10:76982145C>T  | Silent            | VDAC2    | p.P240P  | voltage-dependent anior42 (0.00)    | 56 (0.21) | 0.57 |
| 11-03 | Gp4 | g.chr4:177608541G>A  | Silent            | VEGFC    | p.C315C  | vascular endothelial gro 77 (0.00)  | 63 (0.25) | 0.68 |

|       |     |                      |                   |         |          |                               |            |            |      |
|-------|-----|----------------------|-------------------|---------|----------|-------------------------------|------------|------------|------|
| 11-03 | Gp4 | g.chr12:95663889T>A  | Missense Mutation | VEZT    | p.L258H  | vezatin, adherens junction    | 19 (0.00)  | 30 (0.27)  | 0.91 |
| 11-03 | Gp4 | g.chr8:100791221G>A  | Missense Mutation | VPS13B  | p.V2606I | vacuolar protein sorting 25   | (0.00)     | 18 (0.44)  | 1.19 |
| 11-03 | Gp4 | g.chr1:12342813C>T   | Missense Mutation | VPS13D  | p.L1552F | vacuolar protein sorting 44   | (0.00)     | 76 (0.29)  | 0.77 |
| 11-03 | Gp4 | g.chr12:122716894G>A | Missense Mutation | VPS33A  | p.L564F  | vacuolar protein sorting 15   | (0.00)     | 35 (0.26)  | 0.90 |
| 11-03 | Gp4 | g.chr16:46694443G>A  | Missense Mutation | VPS35   | p.R778C  | vacuolar protein sorting 48   | (0.00)     | 40 (0.23)  | 0.60 |
| 11-03 | Gp4 | g.chr1:151150611C>T  | Silent            | VPS72   | p.E191E  | vacuolar protein sorting 41   | (0.00)     | 26 (0.23)  | 0.62 |
| 11-03 | Gp4 | g.chr19:54561966C>A  | Missense Mutation | VSTM1   | p.D19Y   | V-set and transmembrane       | 32 (0.00)  | 28 (0.18)  | 0.48 |
| 11-03 | Gp4 | g.chr1:119575975C>T  | Missense Mutation | WARS2   | p.M214I  | tryptophanyl tRNA synthetase  | 72 (0.00)  | 34 (0.24)  | 0.63 |
| 11-03 | Gp4 | g.chr7:70885942C>T   | Silent            | WBSCR17 | p.I271I  | Williams-Beuren syndrome      | 145 (0.01) | 71 (0.15)  | 0.41 |
| 11-03 | Gp4 | g.chr2:224746742G>T  | Missense Mutation | WDFY1   | p.S327R  | WD repeat and FYVE domain     | 35 (0.00)  | 60 (0.15)  | 0.40 |
| 11-03 | Gp4 | g.chr4:85600112G>A   | Silent            | WDFY3   | p.P3369P | WD repeat and FYVE domain     | 49 (0.00)  | 34 (0.18)  | 0.47 |
| 11-03 | Gp4 | g.chr4:85600158C>T   | Missense Mutation | WDFY3   | p.G3354D | WD repeat and FYVE domain     | 74 (0.00)  | 48 (0.15)  | 0.39 |
| 11-03 | Gp4 | g.chr10:49997937G>A  | Missense Mutation | WDFY4   | p.D1325N | WDFY family member            | 97 (0.00)  | 43 (0.28)  | 0.74 |
| 11-03 | Gp4 | g.chr4:39233800C>T   | Missense Mutation | WDR19   | p.L721F  | WD repeat domain 19           | 77 (0.00)  | 35 (0.23)  | 0.61 |
| 11-03 | Gp4 | g.chr6:170070742G>A  | Silent            | WDR27   | p.L127L  | WD repeat domain 27           | 91 (0.01)  | 110 (0.35) | 0.92 |
| 11-03 | Gp4 | g.chr1:118494663G>A  | Missense Mutation | WDR3    | p.G623E  | WD repeat domain 3            | 36 (0.00)  | 47 (0.32)  | 0.85 |
| 11-03 | Gp4 | g.chr9:116080824C>T  | Missense Mutation | WDR31   | p.A292T  | WD repeat domain 31           | 38 (0.03)  | 18 (0.39)  | 1.04 |
| 11-03 | Gp4 | g.chr2:29136956C>T   | Missense Mutation | WDR43   | p.P210S  | WD repeat domain 43           | 56 (0.00)  | 26 (0.35)  | 0.92 |
| 11-03 | Gp4 | g.chr2:74652761C>T   | Missense Mutation | WDR54   | p.S313F  | WD repeat domain 54           | 53 (0.02)  | 25 (0.36)  | 0.96 |
| 11-03 | Gp4 | g.chr7:158672619A>G  | Missense Mutation | WDR60   | p.Q273R  | WD repeat domain 60           | 158 (0.00) | 150 (0.16) | 0.43 |
| 11-03 | Gp4 | g.chr5:37701233C>T   | Silent            | WDR70   | p.T422T  | WD repeat domain 70           | 19 (0.00)  | 36 (0.31)  | 0.81 |
| 11-03 | Gp4 | g.chr2:190327300G>A  | Missense Mutation | WDR75   | p.G290E  | WD repeat domain 75           | 29 (0.00)  | 35 (0.29)  | 0.76 |
| 11-03 | Gp4 | g.chr3:52292565G>A   | Missense Mutation | WDR82   | p.A300V  | WD repeat domain 82           | 62 (0.00)  | 61 (0.15)  | 0.39 |
| 11-03 | Gp4 | g.chr12:1005269G>T   | Missense Mutation | WNK1    | p.E1872D | WNK lysine deficient protein  | 33 (0.00)  | 57 (0.16)  | 0.53 |
| 11-03 | Gp4 | g.chr12:993323C>A    | Missense Mutation | WNK1    | p.S1253Y | WNK lysine deficient protein  | 19 (0.00)  | 34 (0.26)  | 0.89 |
| 11-03 | Gp4 | g.chr5:167835555C>T  | Missense Mutation | WWC1    | p.S255F  | WW and C2 domain containing   | 50 (0.02)  | 19 (0.32)  | 0.84 |
| 11-03 | Gp4 | g.chr16:69922027G>T  | Silent            | WWP2    | p.V263V  | WW domain containing          | 53 (0.00)  | 31 (0.16)  | 0.43 |
| 11-03 | Gp4 | g.chr3:14191366G>A   | Intron            | XPC     |          | xeroderma pigmentosum         | 57 (0.02)  | 49 (0.24)  | 0.65 |
| 11-03 | Gp4 | g.chr16:28181087C>A  | Silent            | XPO6    | p.V183V  | exportin 6                    | 68 (0.00)  | 43 (0.21)  | 0.56 |
| 11-03 | Gp4 | g.chr3:142031562T>C  | Missense Mutation | XRN1    | p.M1554V | 5'-3' exoribonuclease 1       | 41 (0.00)  | 22 (0.50)  | 1.33 |
| 11-03 | Gp4 | g.chr18:756699C>T    | Silent            | YES1    | p.P43P   | YES proto-oncogene 1, class B | 44 (0.00)  | 30 (0.37)  | 0.98 |
| 11-03 | Gp4 | g.chr10:27437934G>A  | Silent            | YME1L1  | p.F23F   | YME1-like 1 ATPase            | 19 (0.00)  | 22 (0.32)  | 0.85 |
| 11-03 | Gp4 | g.chr12:57398107G>T  | Missense Mutation | ZBTB39  | p.L199M  | zinc finger and BTB domain    | 51 (0.00)  | 32 (0.28)  | 0.93 |
| 11-03 | Gp4 | g.chr9:37440651C>A   | Missense Mutation | ZBTB5   | p.R633L  | zinc finger and BTB domain    | 27 (0.00)  | 17 (0.29)  | 0.78 |
| 11-03 | Gp4 | g.chr14:75537757C>T  | Missense Mutation | ZC2HC1C | p.H161Y  | zinc finger, C2HC-type        | 39 (0.00)  | 49 (0.18)  | 0.49 |

|       |     |                      |                   |         |          |                                        |            |      |
|-------|-----|----------------------|-------------------|---------|----------|----------------------------------------|------------|------|
| 11-03 | Gp4 | g.chrX:64722918C>A   | Nonsense Mutation | ZC3H12B | p.C780*  | zinc finger CCCH-type 45 (0.00)        | 45 (0.29)  | 0.48 |
| 11-03 | Gp4 | g.chr22:41742116C>T  | Silent            | ZC3H7B  | p.D523D  | zinc finger CCCH-type 36 (0.00)        | 27 (0.30)  | 0.79 |
| 11-03 | Gp4 | g.chr1:52991635C>A   | Silent            | ZCCHC11 | p.V106V  | zinc finger, CCHC domain 21 (0.00)     | 26 (0.23)  | 0.62 |
| 11-03 | Gp4 | g.chr18:60242784G>A  | Splice Site       | ZCCHC2  |          | zinc finger, CCHC domain 41 (0.02)     | 15 (0.60)  | 1.60 |
| 11-03 | Gp4 | g.chr9:88943337C>A   | Missense Mutation | ZCCHC6  | p.W509L  | zinc finger, CCHC domain 17 (0.00)     | 19 (0.26)  | 0.70 |
| 11-03 | Gp4 | g.chr12:122958321G>A | Missense Mutation | ZCCHC8  | p.P378L  | zinc finger, CCHC domain 137 (0.00)    | 151 (0.20) | 0.70 |
| 11-03 | Gp4 | g.chr10:99212652G>C  | Splice Site       | ZDHHC16 | p.R176S  | zinc finger, DHHC-type 57 (0.00)       | 24 (0.25)  | 0.67 |
| 11-03 | Gp4 | g.chr4:16363283G>T   | RNA               | ZEB2P1  |          | zinc finger E-box binding 61 (0.00)    | 29 (0.21)  | 0.55 |
| 11-03 | Gp4 | g.chr10:46122419C>A  | Silent            | ZFAND4  | p.G284G  | zinc finger, AN1-type domain 15 (0.00) | 18 (0.39)  | 1.04 |
| 11-03 | Gp4 | g.chr12:72050756C>T  | Silent            | ZFC3H1  | p.L308L  | zinc finger, C3H1-type 29 (0.00)       | 43 (0.21)  | 0.70 |
| 11-03 | Gp4 | g.chr16:72822351G>A  | Missense Mutation | ZFHX3   | p.P3275L | zinc finger homeobox 3 60 (0.00)       | 39 (0.18)  | 0.48 |
| 11-03 | Gp4 | g.chr16:72827259C>T  | Missense Mutation | ZFHX3   | p.A3108T | zinc finger homeobox 3 80 (0.00)       | 24 (0.21)  | 0.56 |
| 11-03 | Gp4 | g.chr16:72829776C>T  | Missense Mutation | ZFHX3   | p.D2269N | zinc finger homeobox 3 101 (0.00)      | 46 (0.15)  | 0.41 |
| 11-03 | Gp4 | g.chr16:72832200G>A  | Nonsense Mutation | ZFHX3   | p.Q1461* | zinc finger homeobox 3 39 (0.00)       | 42 (0.14)  | 0.38 |
| 11-03 | Gp4 | g.chr16:75203240C>T  | Missense Mutation | ZFP1    | p.P78S   | ZFP1 zinc finger protein 24 (0.00)     | 43 (0.30)  | 0.81 |
| 11-03 | Gp4 | g.chr1:52734137G>T   | Missense Mutation | ZFYVE9  | p.A820S  | zinc finger, FYVE domain 31 (0.00)     | 19 (0.32)  | 0.84 |
| 11-03 | Gp4 | g.chr8:124265828C>T  | Missense Mutation | ZHX1    | p.D787N  | zinc fingers and homeodomain 25 (0.00) | 43 (0.19)  | 0.50 |
| 11-03 | Gp4 | g.chr6:28213633G>A   | Missense Mutation | ZKSCAN4 | p.A300V  | zinc finger with KRAB 34 (0.00)        | 15 (0.33)  | 0.89 |
| 11-03 | Gp4 | g.chr6:28217525G>T   | Missense Mutation | ZKSCAN4 | p.Q171K  | zinc finger with KRAB 22 (0.00)        | 17 (0.94)  | 2.51 |
| 11-03 | Gp4 | g.chr7:99103769C>T   | Silent            | ZKSCAN5 | p.D34D   | zinc finger with KRAB 73 (0.01)        | 54 (0.41)  | 1.09 |
| 11-03 | Gp4 | g.chr6:28121017G>A   | Missense Mutation | ZKSCAN8 | p.R320K  | zinc finger with KRAB 31 (0.00)        | 15 (0.33)  | 0.89 |
| 11-03 | Gp4 | g.chr1:35862170C>T   | Missense Mutation | ZMYM4   | p.P977S  | zinc finger, MYM-type 19 (0.00)        | 23 (0.39)  | 1.04 |
| 11-03 | Gp4 | g.chr1:35480374C>T   | Missense Mutation | ZMYM6   | p.S240N  | zinc finger, MYM-type 18 (0.00)        | 44 (0.30)  | 0.79 |
| 11-03 | Gp4 | g.chr1:247320685C>G  | Missense Mutation | ZNF124  | p.G80A   | zinc finger protein 124 56 (0.00)      | 65 (0.22)  | 0.57 |
| 11-03 | Gp4 | g.chr17:30689996G>T  | Missense Mutation | ZNF207  | p.M221I  | zinc finger protein 207 23 (0.00)      | 18 (0.39)  | 1.04 |
| 11-03 | Gp4 | g.chr10:45498907C>T  | Nonsense Mutation | ZNF22   | p.Q31*   | zinc finger protein 22 42 (0.00)       | 31 (0.23)  | 0.60 |
| 11-03 | Gp4 | g.chr19:44635918C>G  | Missense Mutation | ZNF225  | p.A384G  | zinc finger protein 225 31 (0.00)      | 18 (0.44)  | 1.19 |
| 11-03 | Gp4 | g.chr19:44676291G>T  | Missense Mutation | ZNF226  | p.L22F   | zinc finger protein 226 101 (0.00)     | 76 (0.16)  | 0.42 |
| 11-03 | Gp4 | g.chr19:44681106G>A  | Missense Mutation | ZNF226  | p.C564Y  | zinc finger protein 226 79 (0.00)      | 24 (0.50)  | 1.33 |
| 11-03 | Gp4 | g.chr17:5012793G>A   | Missense Mutation | ZNF232  | p.P132S  | zinc finger protein 232 61 (0.00)      | 50 (0.62)  | 0.61 |
| 11-03 | Gp4 | g.chr19:35435295G>A  | Silent            | ZNF30   | p.R476R  | zinc finger protein 30 51 (0.00)       | 43 (0.16)  | 0.43 |
| 11-03 | Gp4 | g.chr10:43088725C>A  | Missense Mutation | ZNF33B  | p.C558F  | zinc finger protein 33B 34 (0.03)      | 34 (0.44)  | 1.18 |
| 11-03 | Gp4 | g.chr20:32344997C>G  | Missense Mutation | ZNF341  | p.T262R  | zinc finger protein 341 42 (0.00)      | 23 (0.22)  | 0.58 |
| 11-03 | Gp4 | g.chr5:178506524G>T  | Missense Mutation | ZNF354C | p.G364V  | zinc finger protein 354C 56 (0.00)     | 40 (0.15)  | 0.40 |
| 11-03 | Gp4 | g.chr19:37726534C>T  | Silent            | ZNF383  | p.Y31Y   | zinc finger protein 383 19 (0.00)      | 15 (0.47)  | 1.24 |

|       |     |                     |                   |         |          |                                    |           |      |
|-------|-----|---------------------|-------------------|---------|----------|------------------------------------|-----------|------|
| 11-03 | Gp4 | g.chr2:180309667C>T | Missense Mutation | ZNF385B | p.G378E  | zinc finger protein 385B33 (0.00)  | 29 (0.28) | 0.74 |
| 11-03 | Gp4 | g.chr2:180634371C>T | Missense Mutation | ZNF385B | p.V38M   | zinc finger protein 385B69 (0.00)  | 35 (0.20) | 0.53 |
| 11-03 | Gp4 | g.chr18:72345859C>T | Missense Mutation | ZNF407  | p.R962C  | zinc finger protein 407 38 (0.00)  | 28 (0.21) | 0.57 |
| 11-03 | Gp4 | g.chr14:74364828C>A | Nonsense Mutation | ZNF410  | p.S75*   | zinc finger protein 410 34 (0.03)  | 19 (0.32) | 0.84 |
| 11-03 | Gp4 | g.chr19:21713483C>G | Missense Mutation | ZNF429  | p.P75A   | zinc finger protein 429 24 (0.00)  | 16 (0.56) | 1.50 |
| 11-03 | Gp4 | g.chr19:12127345C>T | Missense Mutation | ZNF433  | p.G113S  | zinc finger protein 433 22 (0.00)  | 60 (0.20) | 0.53 |
| 11-03 | Gp4 | g.chr10:31138999G>A | Missense Mutation | ZNF438  | p.S112F  | zinc finger protein 438 49 (0.00)  | 26 (0.23) | 0.62 |
| 11-03 | Gp4 | g.chr10:31139180G>A | Missense Mutation | ZNF438  | p.P52S   | zinc finger protein 438 25 (0.00)  | 20 (0.35) | 0.93 |
| 11-03 | Gp4 | g.chr19:11978266G>A | Missense Mutation | ZNF439  | p.V128I  | zinc finger protein 439 19 (0.00)  | 49 (0.18) | 0.49 |
| 11-03 | Gp4 | g.chr19:11892235G>A | Silent            | ZNF441  | p.K532K  | zinc finger protein 441 26 (0.00)  | 21 (0.52) | 1.40 |
| 11-03 | Gp4 | g.chr19:12541634C>G | Missense Mutation | ZNF443  | p.C451S  | zinc finger protein 443 18 (0.00)  | 30 (0.23) | 0.62 |
| 11-03 | Gp4 | g.chr9:109688515C>T | Silent            | ZNF462  | p.F774F  | zinc finger protein 462 52 (0.00)  | 37 (0.59) | 1.59 |
| 11-03 | Gp4 | g.chr9:109701267C>A | Silent            | ZNF462  | p.S1008S | zinc finger protein 462 50 (0.00)  | 52 (0.25) | 0.67 |
| 11-03 | Gp4 | g.chr10:97917991C>A | RNA               | ZNF518A |          | zinc finger protein 518A33 (0.00)  | 52 (0.17) | 0.46 |
| 11-03 | Gp4 | g.chr10:97918006T>A | RNA               | ZNF518A |          | zinc finger protein 518A31 (0.00)  | 56 (0.16) | 0.43 |
| 11-03 | Gp4 | g.chr19:57888537C>A | Missense Mutation | ZNF547  | p.P65T   | zinc finger protein 547 22 (0.00)  | 27 (0.22) | 0.59 |
| 11-03 | Gp4 | g.chr19:37966813G>A | Missense Mutation | ZNF570  | p.D22N   | zinc finger protein 570 31 (0.00)  | 27 (0.22) | 0.59 |
| 11-03 | Gp4 | g.chr19:52376138G>A | Missense Mutation | ZNF577  | p.L369F  | zinc finger protein 577 32 (0.00)  | 33 (0.15) | 0.40 |
| 11-03 | Gp4 | g.chr15:85343201C>A | Missense Mutation | ZNF592  | p.S1089Y | zinc finger protein 592 30 (0.00)  | 17 (0.29) | 0.78 |
| 11-03 | Gp4 | g.chr15:85343202C>A | Silent            | ZNF592  | p.S1089S | zinc finger protein 592 30 (0.00)  | 17 (0.29) | 0.78 |
| 11-03 | Gp4 | g.chr19:52857025G>A | Missense Mutation | ZNF610  | p.V52M   | zinc finger protein 610 52 (0.00)  | 56 (0.23) | 0.62 |
| 11-03 | Gp4 | g.chr19:52519922C>A | Missense Mutation | ZNF614  | p.S310I  | zinc finger protein 614 48 (0.00)  | 29 (0.24) | 0.64 |
| 11-03 | Gp4 | g.chr3:40528997C>A  | Silent            | ZNF619  | p.I372I  | zinc finger protein 619 18 (0.00)  | 16 (0.31) | 0.83 |
| 11-03 | Gp4 | g.chr17:47388778G>A | Missense Mutation | ZNF652  | p.S402F  | zinc finger protein 652 23 (0.00)  | 43 (0.16) | 0.43 |
| 11-03 | Gp4 | g.chr19:53667850A>G | Silent            | ZNF665  | p.C631C  | zinc finger protein 665 32 (0.00)  | 35 (0.14) | 0.38 |
| 11-03 | Gp4 | g.chr19:53669234G>C | Missense Mutation | ZNF665  | p.S170C  | zinc finger protein 665 41 (0.00)  | 27 (0.22) | 0.59 |
| 11-03 | Gp4 | g.chr19:22362974G>T | Missense Mutation | ZNF676  | p.S515R  | zinc finger protein 676 62 (0.00)  | 41 (0.17) | 0.46 |
| 11-03 | Gp4 | g.chr19:57133006C>T | Silent            | ZNF71   | p.L117L  | zinc finger protein 71 25 (0.00)   | 14 (0.36) | 0.95 |
| 11-03 | Gp4 | g.chr6:35258160G>C  | Splice Site       | ZNF76   |          | zinc finger protein 76 59 (0.00)   | 21 (0.29) | 0.76 |
| 11-03 | Gp4 | g.chr7:148767525T>C | Missense Mutation | ZNF786  | p.D780G  | zinc finger protein 786 114 (0.00) | 90 (0.21) | 0.56 |
| 11-03 | Gp4 | g.chr9:130198252G>A | Missense Mutation | ZNF79   | p.E100K  | zinc finger protein 79 37 (0.00)   | 25 (0.36) | 0.96 |
| 11-03 | Gp4 | g.chr2:185803416T>A | Missense Mutation | ZNF804A | p.I1098N | zinc finger protein 804A64 (0.00)  | 25 (0.28) | 0.75 |
| 11-03 | Gp4 | g.chr19:58388309C>T | Silent            | ZNF814  | p.E46E   | zinc finger protein 814 46 (0.00)  | 35 (0.17) | 0.46 |
| 11-03 | Gp4 | g.chr19:52658506C>A | Missense Mutation | ZNF836  | p.E810D  | zinc finger protein 836 40 (0.00)  | 61 (0.34) | 0.92 |
| 11-03 | Gp4 | g.chr19:53854097G>A | Missense Mutation | ZNF845  | p.E57K   | zinc finger protein 845 33 (0.00)  | 20 (0.25) | 0.67 |

|              |     |                     |                   |            |          |                                    |            |           |      |
|--------------|-----|---------------------|-------------------|------------|----------|------------------------------------|------------|-----------|------|
| 11-03        | Gp4 | g.chr19:9872761G>A  | Nonsense Mutation | ZNF846     | p.Q76*   | zinc finger protein 846            | 16 (0.00)  | 38 (0.21) | 0.56 |
| 11-03        | Gp4 | g.chr7:149557860C>T | Silent            | ZNF862     | p.D537D  | zinc finger protein 862            | 52 (0.00)  | 34 (0.18) | 0.47 |
| 11-03        | Gp4 | g.chr7:149557941C>T | Silent            | ZNF862     | p.S564S  | zinc finger protein 862            | 74 (0.00)  | 31 (0.32) | 0.86 |
| 11-03        | Gp4 | g.chr19:22941604G>A | Silent            | ZNF99      | p.Y369Y  | zinc finger protein 99             | 59 (0.00)  | 22 (0.36) | 0.97 |
| 11-03        | Gp4 | g.chr20:47886882T>C | Silent            | ZNFX1      | p.Q489Q  | zinc finger, NFX1-type 1           | 27 (0.00)  | 13 (0.38) | 1.03 |
| 11-03        | Gp4 | g.chr16:21209122C>T | Missense Mutation | ZP2        | p.S687N  | zona pellucida glycopro            | 23 (0.00)  | 42 (0.14) | 0.38 |
| 11-03        | Gp4 | g.chr16:21213029G>T | Missense Mutation | ZP2        | p.P501Q  | zona pellucida glycopro            | 47 (0.00)  | 20 (0.30) | 0.80 |
| 11-03        | Gp4 | g.chr1:238053252C>G | Missense Mutation | ZP4        | p.M105I  | zona pellucida glycopro            | 35 (0.00)  | 29 (0.38) | 1.01 |
| 11-03        | Gp4 | g.chr17:38032973G>A | Missense Mutation | ZPBP2      | p.V310I  | zona pellucida binding p           | 36 (0.00)  | 54 (0.17) | 0.44 |
| 11-03        | Gp4 | g.chrX:15833900G>C  | Missense Mutation | ZRSR2      | p.D220H  | zinc finger (CCCH type             | 84 (0.01)  | 57 (0.40) | 0.67 |
| 11-03        | Gp4 | g.chr1:33960000C>G  | Missense Mutation | ZSCAN20    | p.Q686E  | zinc finger and SCAN d             | 39 (0.00)  | 51 (0.24) | 0.63 |
| 11-03        | Gp4 | g.chr15:43661997G>A | Missense Mutation | ZSCAN29    | p.L39F   | zinc finger and SCAN d             | 54 (0.00)  | 19 (0.26) | 0.70 |
| 11-03        | Gp4 | g.chr17:3984693G>A  | Missense Mutation | ZZEF1      | p.L936F  | zinc finger, ZZ-type wit           | 37 (0.00)  | 40 (0.35) | 0.93 |
| 11-03        | Gp4 | g.chr17:3985793G>A  | Silent            | ZZEF1      | p.V884V  | zinc finger, ZZ-type wit           | 19 (0.00)  | 32 (0.19) | 0.50 |
| 11-03        | Gp4 | g.chr1:78098746C>T  | Silent            | ZZZ3       | p.R98R   | zinc finger, ZZ-type con           | 52 (0.00)  | 23 (0.78) | 0.89 |
| 11-10 Area 1 | Gp3 | g.chr4:87968376G>A  | Missense Mutation | AFF1       | p.R223Q  | AF4/FMR2 family, men               | 76 (0.00)  | 38 (0.18) | 0.49 |
| 11-10 Area 1 | Gp3 | g.chr18:14183710A>G | RNA               | ANKRD20A5P |          | ankyrin repeat domain              | 279 (0.01) | 47 (0.15) | 0.40 |
| 11-10 Area 1 | Gp3 | g.chr21:11182670T>A | lincRNA           | AP003900.6 |          |                                    | 38 (0.03)  | 40 (0.23) | 0.60 |
| 11-10 Area 1 | Gp3 | g.chr14:67812524G>T | Silent            | ATP6V1D    | p.A84A   | ATPase, H <sup>+</sup> transportin | 64 (0.00)  | 35 (0.14) | 0.38 |
| 11-10 Area 1 | Gp3 | g.chr21:11094824G>A | RNA               | BAGE2      |          | B melanoma antigen fan             | 23 (0.00)  | 22 (0.27) | 0.73 |
| 11-10 Area 1 | Gp3 | g.chr11:47179460C>T | Silent            | C11orf49   | p.I248I  | chromosome 11 open re              | 79 (0.01)  | 68 (0.15) | 0.39 |
| 11-10 Area 1 | Gp3 | g.chr11:10794731C>T | Nonsense Mutation | CTR9       | p.Q880*  | CTR9, Paf1/RNA polyn               | 35 (0.03)  | 30 (0.30) | 0.80 |
| 11-10 Area 1 | Gp3 | g.chr11:58893250A>G | Silent            | FAM111B    | p.G560G  | family with sequence si            | 98 (0.00)  | 42 (0.17) | 0.44 |
| 11-10 Area 1 | Gp3 | g.chr6:116265469C>T | Missense Mutation | FRK        | p.V360I  | fyn-related Src family ty          | 15 (0.00)  | 29 (0.17) | 0.46 |
| 11-10 Area 1 | Gp3 | g.chr2:207041261G>A | Silent            | GPR1       | p.S237S  | G protein-coupled recep            | 35 (0.00)  | 30 (0.17) | 0.44 |
| 11-10 Area 1 | Gp3 | g.chr4:143393616T>C | Intron            | INPP4B     |          | inositol polyphosphate             | 44 (0.00)  | 41 (0.34) | 0.91 |
| 11-10 Area 1 | Gp3 | g.chr3:12977997C>T  | Silent            | IQSEC1     | p.V187V  | IQ motif and Sec7 dom              | 35 (0.00)  | 38 (0.34) | 0.91 |
| 11-10 Area 1 | Gp3 | g.chr3:124160792G>A | Splice Site       | KALRN      | p.A1065T | kalirin, RhoGEF kinase             | 37 (0.00)  | 28 (0.25) | 0.67 |
| 11-10 Area 1 | Gp3 | g.chr7:77740060A>G  | Intron            | MAGI2      |          | membrane associated gu             | 72 (0.00)  | 58 (0.36) | 0.97 |
| 11-10 Area 1 | Gp3 | g.chr11:82868580C>A | Missense Mutation | PCF11      | p.S33R   | PCF11 cleavage and pol             | 38 (0.00)  | 64 (0.19) | 0.50 |
| 11-10 Area 1 | Gp3 | g.chr11:82868592C>A | Silent            | PCF11      | p.I37I   | PCF11 cleavage and pol             | 40 (0.00)  | 71 (0.17) | 0.45 |
| 11-10 Area 1 | Gp3 | g.chr2:113316998C>T | Missense Mutation | POLR1B     | p.R431C  | polymerase (RNA) I pol             | 37 (0.00)  | 42 (0.36) | 0.95 |
| 11-10 Area 1 | Gp3 | g.chr18:77798574G>A | Missense Mutation | RBFA       | p.A150T  | ribosome binding factor            | 31 (0.00)  | 20 (0.45) | 0.76 |
| 11-10 Area 1 | Gp3 | g.chr17:63186329G>A | Missense Mutation | RGS9       | p.V241M  | regulator of G-protein si          | 52 (0.00)  | 41 (0.17) | 0.46 |
| 11-10 Area 1 | Gp3 | g.chr2:216986900G>A | Missense Mutation | XRCC5      | p.E203K  | X-ray repair complemer             | 52 (0.00)  | 34 (0.15) | 0.39 |

|              |     |                          |                   |             |           |                           |            |            |      |
|--------------|-----|--------------------------|-------------------|-------------|-----------|---------------------------|------------|------------|------|
| 11-10 Area 1 | Gp4 | g.chr12:34179259C>T      | Silent            | ALG10       | p.G277G   | ALG10, alpha-1,2-gluc     | 57 (0.00)  | 20 (0.25)  | 0.67 |
| 11-10 Area 1 | Gp4 | g.chr21:11072375T>C      | RNA               | BAGE2       |           | B melanoma antigen fa     | 26 (0.00)  | 23 (0.26)  | 0.70 |
| 11-10 Area 1 | Gp4 | g.chr11:4615225T>C       | Missense Mutation | OR52I1      | p.L10P    | olfactory receptor, fami  | 148 (0.00) | 105 (0.25) | 0.66 |
| 11-10 Area 1 | Gp4 | g.chr1:158687361A>G      | Missense Mutation | OR6K3       | p.V182A   | olfactory receptor, fami  | 38 (0.00)  | 30 (0.40)  | 1.07 |
| 11-10 Area 1 | Gp4 | g.chr17:1561959C>T       | Missense Mutation | PRPF8       | p.R1746Q  | pre-mRNA processing f     | 64 (0.00)  | 42 (0.55)  | 1.46 |
| 11-10 Area 1 | Gp4 | g.chr9:131356626C>T      | Nonsense Mutation | SPTAN1      | p.Q1130*  | spectrin, alpha, non-eryt | 31 (0.00)  | 23 (0.22)  | 0.58 |
| 11-10 Area 1 | Gp4 | g.chr11:64004692C>T      | Silent            | VEGFB       | p.D136D   | vascular endothelial gro  | 40 (0.00)  | 48 (0.17)  | 0.44 |
| 11-10 Area 1 | Gp4 | g.chr4:39278673G>A       | Silent            | WDR19       | p.T1250T  | WD repeat domain 19       | 28 (0.00)  | 32 (0.16)  | 0.42 |
| 11-10 Area 1 | Gp4 | g.chr4:142152631C>T      | Missense Mutation | ZNF330      | p.R188C   | zinc finger protein 330   | 144 (0.00) | 55 (0.29)  | 0.78 |
| 11-10 Area 2 | Gp3 | g.chr1:94502838C>A       | Missense Mutation | ABCA4       | p.G1226C  | ATP-binding cassette, s1  | 84 (0.01)  | 95 (0.41)  | 1.09 |
| 11-10 Area 2 | Gp3 | g.chr2:169814584_1698144 | Frame Shift Del   | ABCB11      | p.L745fs  | ATP-binding cassette, s1  | 311 (0.00) | 45 (0.31)  | 0.83 |
| 11-10 Area 2 | Gp3 | g.chr1:179086524A>G      | Missense Mutation | ABL2        | p.W451R   | ABL proto-oncogene 2,     | 27 (0.00)  | 40 (0.65)  | 1.73 |
| 11-10 Area 2 | Gp3 | g.chr17:34235843G>T      | lincRNA           | AC015849.16 |           |                           | 52 (0.00)  | 19 (0.26)  | 0.70 |
| 11-10 Area 2 | Gp3 | g.chr17:35609955C>A      | Missense Mutation | ACACA       | p.V575L   | acetyl-CoA carboxylase    | 81 (0.01)  | 190 (0.50) | 1.33 |
| 11-10 Area 2 | Gp3 | g.chr3:179305768G>A      | Silent            | ACTL6A      | p.G420G   | actin-like 6A             | 53 (0.00)  | 128 (0.99) | 2.65 |
| 11-10 Area 2 | Gp3 | g.chr6:11766568C>T       | Missense Mutation | ADTRP       | p.R110Q   | androgen-dependent TF.    | 122 (0.00) | 34 (0.88)  | 2.35 |
| 11-10 Area 2 | Gp3 | g.chr10:48235974C>T      | Silent            | AGAP9       | p.S247S   | ArfGAP with GTPase d      | 110 (0.01) | 38 (0.95)  | 2.00 |
| 11-10 Area 2 | Gp3 | g.chr5:35040740C>A       | Missense Mutation | AGXT2       | p.K39N    | alanine--glyoxylate ami   | 59 (0.00)  | 40 (0.97)  | 2.60 |
| 11-10 Area 2 | Gp3 | g.chr14:33204927C>A      | Missense Mutation | AKAP6       | p.L1071M  | A kinase (PRKA) ancho     | 33 (0.00)  | 42 (0.38)  | 1.02 |
| 11-10 Area 2 | Gp3 | g.chr4:74005562C>A       | Missense Mutation | ANKRD17     | p.G924V   | ankyrin repeat domain 1   | 132 (0.00) | 10 (0.80)  | 2.13 |
| 11-10 Area 2 | Gp3 | g.chr11:22294451G>T      | Missense Mutation | ANO5        | p.R717S   | anoctamin 5               | 18 (0.00)  | 112 (0.47) | 1.26 |
| 11-10 Area 2 | Gp3 | g.chr12:99097190C>A      | Missense Mutation | APAF1       | p.H836Q   | apoptotic peptidase acti  | 54 (0.00)  | 36 (0.94)  | 2.52 |
| 11-10 Area 2 | Gp3 | g.chr1:156563749C>T      | Missense Mutation | APOA1BP     | p.S247F   | apolipoprotein A-I bindi  | 119 (0.00) | 295 (0.29) | 0.78 |
| 11-10 Area 2 | Gp3 | g.chr1:156563753A>T      | Silent            | APOA1BP     | p.A248A   | apolipoprotein A-I bindi  | 117 (0.00) | 288 (0.29) | 0.78 |
| 11-10 Area 2 | Gp3 | g.chr22:36556813C>A      | Missense Mutation | APOL3       | p.V43L    | apolipoprotein L, 3       | 71 (0.00)  | 160 (0.62) | 1.65 |
| 11-10 Area 2 | Gp3 | g.chr16:24960756T>C      | Missense Mutation | ARHGAP17    | p.K366E   | Rho GTPase activating j   | 30 (0.00)  | 67 (0.28)  | 0.76 |
| 11-10 Area 2 | Gp3 | g.chr12:46215255T>C      | Silent            | ARID2       | p.D230D   | AT rich interactive dom   | 30 (0.00)  | 93 (0.16)  | 0.43 |
| 11-10 Area 2 | Gp3 | g.chr14:58814476G>A      | Missense Mutation | ARID4A      | p.M428I   | AT rich interactive dom   | 65 (0.00)  | 26 (0.46)  | 1.23 |
| 11-10 Area 2 | Gp3 | g.chr7:95166961G>T       | Missense Mutation | ASB4        | p.A391S   | ankyrin repeat and SOC    | 37 (0.00)  | 105 (0.55) | 1.47 |
| 11-10 Area 2 | Gp3 | g.chr19:3918876_3918885  | Splice Site       | ATCAY       |           | ataxia, cerebellar, Caym  | 36 (0.00)  | 26 (0.92)  | 2.46 |
| 11-10 Area 2 | Gp3 | g.chr18:43669649C>G      | Missense Mutation | ATP5A1      | p.G178A   | ATP synthase, H+ transj   | 63 (0.00)  | 62 (0.98)  | 2.62 |
| 11-10 Area 2 | Gp3 | g.chr17:40639274_4063927 | In Frame Del      | ATP6V0A1    | p.H312del | ATPase, H+ transportin;   | 40 (0.00)  | 47 (0.81)  | 1.72 |
| 11-10 Area 2 | Gp3 | g.chr2:32688401A>G       | Silent            | BIRC6       | p.L1631L  | baculoviral IAP repeat c  | 81 (0.00)  | 41 (0.95)  | 2.54 |
| 11-10 Area 2 | Gp3 | g.chr15:91281603G>T      | Intron            | BLM         |           | Bloom syndrome, RecQ      | 45 (0.00)  | 16 (0.88)  | 2.33 |
| 11-10 Area 2 | Gp3 | g.chr1:220232224G>A      | Nonsense Mutation | BPNT1       | p.R297*   | 3'(2'), 5'-bisphosphate n | 137 (0.01) | 62 (0.98)  | 2.62 |

|              |     |                               |                   |           |            |                                         |            |            |      |
|--------------|-----|-------------------------------|-------------------|-----------|------------|-----------------------------------------|------------|------------|------|
| 11-10 Area 2 | Gp3 | g.chr1:220232248_220232249G>A | Frame Shift Del   | BPNT1     | p.R289fs   | 3'(2'), 5'-bisphosphate nucleoside      | 127 (0.00) | 73 (0.99)  | 2.63 |
| 11-10 Area 2 | Gp3 | g.chr13:32903371C>T           | Intron            | BRCA2     |            | breast cancer 2, early onset            | 88 (0.00)  | 80 (0.20)  | 0.53 |
| 11-10 Area 2 | Gp3 | g.chr6:26407980A>T            | Missense Mutation | BTN3A1    | p.Y172F    | butyrophilin, subfamily 101             | 101 (0.00) | 10 (0.70)  | 1.87 |
| 11-10 Area 2 | Gp3 | g.chr6:26370775G>T            | Missense Mutation | BTN3A2    | p.C220F    | butyrophilin, subfamily 171             | 171 (0.00) | 29 (0.21)  | 0.55 |
| 11-10 Area 2 | Gp3 | g.chr17:36993404C>T           | Nonsense Mutation | C17orf98  | p.W99*     | chromosome 17 open reading frame        | 45 (0.02)  | 66 (0.98)  | 2.63 |
| 11-10 Area 2 | Gp3 | g.chr20:3262291G>C            | Missense Mutation | C20orf194 | p.H870D    | chromosome 20 open reading frame        | 21 (0.00)  | 87 (0.87)  | 2.33 |
| 11-10 Area 2 | Gp3 | g.chr8:38385970C>T            | Silent            | C8orf86   | p.E62E     | chromosome 8 open reading frame         | 42 (0.02)  | 473 (0.42) | 1.12 |
| 11-10 Area 2 | Gp3 | g.chr9:114510403G>T           | Missense Mutation | C9orf84   | p.S210R    | chromosome 9 open reading frame         | 85 (0.00)  | 54 (0.37)  | 0.99 |
| 11-10 Area 2 | Gp3 | g.chr8:86356297_86356298G>A   | In Frame Del      | CA3       | p.129_130T | carbonic anhydrase III, cytoplasmic     | 198 (0.00) | 152 (0.93) | 2.47 |
| 11-10 Area 2 | Gp3 | g.chr8:86356342G>A            | Missense Mutation | CA3       | p.G144D    | carbonic anhydrase III, cytoplasmic     | 161 (0.00) | 145 (0.99) | 2.65 |
| 11-10 Area 2 | Gp3 | g.chr2:27461392C>A            | Missense Mutation | CAD       | p.R1589S   | carbamoyl-phosphate synthase            | 31 (0.00)  | 127 (0.23) | 0.61 |
| 11-10 Area 2 | Gp3 | g.chr3:85950923T>C            | Intron            | CADM2     |            | cell adhesion molecule 2                | 62 (0.00)  | 85 (0.98)  | 2.60 |
| 11-10 Area 2 | Gp3 | g.chr17:4877782C>A            | Silent            | CAMTA2    | p.R643R    | calmodulin binding transcription factor | 65 (0.00)  | 66 (0.35)  | 0.93 |
| 11-10 Area 2 | Gp3 | g.chr7:2987374C>A             | Nonsense Mutation | CARD11    | p.E19*     | caspase recruitment domain 11           | 130 (0.00) | 21 (0.29)  | 0.76 |
| 11-10 Area 2 | Gp3 | g.chr17:73509883C>T           | Start Codon SNP   | CASKIN2   | p.M1I      | CASK interacting protein                | 38 (0.00)  | 53 (0.98)  | 2.62 |
| 11-10 Area 2 | Gp3 | g.chr4:26487339C>A            | Missense Mutation | CCKAR     | p.L182F    | cholecystokinin A receptor              | 49 (0.00)  | 38 (0.26)  | 0.70 |
| 11-10 Area 2 | Gp3 | g.chr19:8122722C>T            | Silent            | CCL25     | p.N121N    | chemokine (C-C motif) ligand 25         | 15 (0.00)  | 123 (0.44) | 1.17 |
| 11-10 Area 2 | Gp3 | g.chr14:20784513C>A           | Missense Mutation | CCNB1IP1  | p.G57V     | cyclin B1 interacting protein           | 27 (0.00)  | 46 (0.74)  | 1.97 |
| 11-10 Area 2 | Gp3 | g.chr12:49089839C>A           | Missense Mutation | CCNT1     | p.D217Y    | cyclin T1                               | 77 (0.00)  | 92 (0.18)  | 0.49 |
| 11-10 Area 2 | Gp3 | g.chr12:69992135G>T           | Missense Mutation | CCT2      | p.D457Y    | chaperonin containing TCP1 domain       | 31 (0.00)  | 21 (0.95)  | 2.54 |
| 11-10 Area 2 | Gp3 | g.chr11:117258096C>A          | Silent            | CEP164    | p.L634L    | centrosomal protein 164                 | 47 (0.02)  | 114 (0.54) | 1.43 |
| 11-10 Area 2 | Gp3 | g.chr1:6172286T>C             | Missense Mutation | CHD5      | p.D1685G   | chromodomain helicase                   | 17 (0.00)  | 30 (0.17)  | 0.44 |
| 11-10 Area 2 | Gp3 | g.chr8:61736497C>T            | Silent            | CHD7      | p.R1100R   | chromodomain helicase                   | 59 (0.00)  | 93 (0.18)  | 0.49 |
| 11-10 Area 2 | Gp3 | g.chr3:33663689T>C            | Silent            | CLASP2    | p.A374A    | cytoplasmic linker associated protein   | 78 (0.00)  | 117 (0.16) | 0.43 |
| 11-10 Area 2 | Gp3 | g.chr1:36216914T>C            | Silent            | CLSPN     | p.K655K    | claspin                                 | 17 (0.00)  | 33 (0.18)  | 0.48 |
| 11-10 Area 2 | Gp3 | g.chr4:78663420G>T            | Silent            | CNOT6L    | p.L249L    | CCR4-NOT transcription factor           | 61 (0.00)  | 129 (0.36) | 0.97 |
| 11-10 Area 2 | Gp3 | g.chr17:71197928G>A           | Silent            | COG1      | p.K654K    | component of oligomerization            | 38 (0.03)  | 78 (0.47)  | 1.26 |
| 11-10 Area 2 | Gp3 | g.chr3:130284355C>A           | Missense Mutation | COL6A6    | p.F393L    | collagen, type VI, alpha 4              | 44 (0.00)  | 31 (0.84)  | 2.24 |
| 11-10 Area 2 | Gp3 | g.chr5:173316975C>T           | Missense Mutation | CPEB4     | p.A80V     | cytoplasmic polyadenylation element     | 165 (0.01) | 45 (0.40)  | 1.07 |
| 11-10 Area 2 | Gp3 | g.chr3:97607285C>T            | Missense Mutation | CRYBG3    | p.H516Y    | beta-gamma crystallin domain            | 131 (0.00) | 85 (0.25)  | 0.66 |
| 11-10 Area 2 | Gp3 | g.chr8:68070815G>A            | Missense Mutation | CSPP1     | p.R787K    | centrosome and spindle pole body        | 97 (0.00)  | 50 (0.96)  | 2.56 |
| 11-10 Area 2 | Gp3 | g.chr12:77259983C>A           | Missense Mutation | CSRP2     | p.A20S     | cysteine and glycine-rich protein       | 19 (0.00)  | 29 (0.97)  | 2.57 |
| 11-10 Area 2 | Gp3 | g.chr20:23420953G>T           | Missense Mutation | CSTL1     | p.V17F     | cystatin-like 1                         | 22 (0.00)  | 70 (0.96)  | 2.55 |
| 11-10 Area 2 | Gp3 | g.chr10:68940103T>C           | Missense Mutation | CTNNA3    | p.Q340R    | catenin (cadherin-associated protein)   | 91 (0.01)  | 15 (0.33)  | 0.89 |
| 11-10 Area 2 | Gp3 | g.chr9:124457887C>A           | Intron            | DAB2IP    |            | DAB2 interacting protein                | 46 (0.00)  | 19 (0.63)  | 1.68 |



|              |     |                             |                   |         |           |                           |            |            |      |
|--------------|-----|-----------------------------|-------------------|---------|-----------|---------------------------|------------|------------|------|
| 11-10 Area 2 | Gp3 | g.chr9:124494930C>A         | Intron            | DAB2IP  |           | DAB2 interacting protei   | 41 (0.02)  | 48 (0.17)  | 0.44 |
| 11-10 Area 2 | Gp3 | g.chr4:169227844G>A         | Missense Mutation | DDX60   | p.P98S    | DEAD (Asp-Glu-Ala-A       | 131 (0.00) | 25 (0.52)  | 1.39 |
| 11-10 Area 2 | Gp3 | g.chr8:142195275C>T         | Silent            | DENND3  | p.H994H   | DENN/MADD domain          | 36 (0.00)  | 18 (0.94)  | 2.52 |
| 11-10 Area 2 | Gp3 | g.chr9:22451753C>T          | Missense Mutation | DMRTA1  | p.S453L   | DMRT-like family A1       | 145 (0.00) | 15 (0.93)  | 2.49 |
| 11-10 Area 2 | Gp3 | g.chr7:86822515C>A          | Splice Site       | DMTF1   | p.S499Y   | cyclin D binding myb-li   | 98 (0.00)  | 69 (0.25)  | 0.66 |
| 11-10 Area 2 | Gp3 | g.chr11:6589778G>T          | Silent            | DNHD1   | p.V4211V  | dynein heavy chain dom    | 25 (0.00)  | 87 (0.20)  | 0.52 |
| 11-10 Area 2 | Gp3 | g.chr6:127611088C>A         | Missense Mutation | ECHDC1  | p.D284Y   | enoyl CoA hydratase do    | 100 (0.00) | 48 (0.52)  | 1.39 |
| 11-10 Area 2 | Gp3 | g.chr2:99980830C>A          | Missense Mutation | EIF5B   | p.Q412K   | eukaryotic translation in | 195 (0.00) | 179 (0.65) | 1.73 |
| 11-10 Area 2 | Gp3 | g.chr3:10016117C>A          | Missense Mutation | EMC3    | p.M121I   | ER membrane protein c     | 25 (0.00)  | 173 (0.99) | 2.65 |
| 11-10 Area 2 | Gp3 | g.chr1:8925468C>T           | Silent            | ENO1    | p.A247A   | enolase 1, (alpha)        | 69 (0.01)  | 31 (0.97)  | 2.58 |
| 11-10 Area 2 | Gp3 | g.chr21:39781516A>G         | Intron            | ERG     |           | v-ets avian erythroblastc | 40 (0.03)  | 226 (0.84) | 2.23 |
| 11-10 Area 2 | Gp3 | g.chr21:39784988G>T         | Intron            | ERG     |           | v-ets avian erythroblastc | 33 (0.00)  | 94 (0.99)  | 2.64 |
| 11-10 Area 2 | Gp3 | g.chr21:39795276C>A         | Intron            | ERG     |           | v-ets avian erythroblastc | 15 (0.00)  | 17 (0.82)  | 2.20 |
| 11-10 Area 2 | Gp3 | g.chr21:39978316A>G         | Intron            | ERG     |           | v-ets avian erythroblastc | 26 (0.00)  | 57 (0.18)  | 0.47 |
| 11-10 Area 2 | Gp3 | g.chr10:94757300C>T         | Silent            | EXOC6   | p.L675L   | exocyst complex compo     | 86 (0.01)  | 94 (0.21)  | 0.57 |
| 11-10 Area 2 | Gp3 | g.chr10:120877051_120877051 | Frame Shift Del   | FAM45A  | p.S118fs  | family with sequence si   | 62 (0.00)  | 128 (0.98) | 2.62 |
| 11-10 Area 2 | Gp3 | g.chr17:644608G>T           | Missense Mutation | FAM57A  | p.C159F   | family with sequence si   | 45 (0.02)  | 99 (0.17)  | 0.46 |
| 11-10 Area 2 | Gp3 | g.chr4:187540319_187540319  | Frame Shift Del   | FAT1    | p.S2475fs | FAT atypical cadherin     | 163 (0.00) | 129 (0.95) | 2.54 |
| 11-10 Area 2 | Gp3 | g.chr3:97711649C>G          | RNA               | GABRR3  |           | gamma-aminobutyric ac     | 79 (0.00)  | 14 (0.43)  | 1.14 |
| 11-10 Area 2 | Gp3 | g.chr3:97711787G>A          | RNA               | GABRR3  |           | gamma-aminobutyric ac     | 150 (0.00) | 112 (0.99) | 2.64 |
| 11-10 Area 2 | Gp3 | g.chr5:132200163A>T         | Silent            | GDF9    | p.I21I    | growth differentiation fa | 118 (0.00) | 10 (0.90)  | 2.40 |
| 11-10 Area 2 | Gp3 | g.chr9:36234086C>T          | Silent            | GNE     | p.E161E   | glucosamine (UDP-N-ac     | 47 (0.00)  | 14 (0.36)  | 0.95 |
| 11-10 Area 2 | Gp3 | g.chr1:156565355C>T         | Missense Mutation | GPATCH4 | p.E260K   | G patch domain contain    | 199 (0.01) | 36 (0.94)  | 2.52 |
| 11-10 Area 2 | Gp3 | g.chr12:67072664T>A         | Missense Mutation | GRIP1   | p.K7N     | glutamate receptor inter  | 49 (0.00)  | 25 (0.96)  | 2.56 |
| 11-10 Area 2 | Gp3 | g.chr12:67072665T>A         | Missense Mutation | GRIP1   | p.K7I     | glutamate receptor inter  | 49 (0.00)  | 24 (0.96)  | 2.56 |
| 11-10 Area 2 | Gp3 | g.chr12:67072666T>A         | Nonsense Mutation | GRIP1   | p.K7*     | glutamate receptor inter  | 49 (0.00)  | 24 (0.96)  | 2.56 |
| 11-10 Area 2 | Gp3 | g.chrX:51487880C>T          | Silent            | GSPT2   | p.H386H   | G1 to S phase transition  | 42 (0.00)  | 94 (0.99)  | 1.65 |
| 11-10 Area 2 | Gp3 | g.chr9:135555190G>T         | Splice Site       | GTF3C4  | p.R728R   | general transcription fac | 37 (0.00)  | 24 (0.33)  | 0.89 |
| 11-10 Area 2 | Gp3 | g.chr7:18905097C>A          | Intron            | HDAC9   |           | histone deacetylase 9     | 147 (0.00) | 7 (0.71)   | 1.90 |
| 11-10 Area 2 | Gp3 | g.chr7:18980840C>T          | Intron            | HDAC9   |           | histone deacetylase 9     | 140 (0.01) | 62 (0.95)  | 2.54 |
| 11-10 Area 2 | Gp3 | g.chr15:20620340T>A         | RNA               | HERC2P3 |           | hect domain and RLD 2     | 24 (0.00)  | 26 (0.92)  | 2.46 |
| 11-10 Area 2 | Gp3 | g.chr5:74009451_74009451    | Frame Shift Del   | HEXB    | p.W298fs  | hexosaminidase B (beta    | 24 (0.00)  | 91 (0.99)  | 2.64 |
| 11-10 Area 2 | Gp3 | g.chr5:74011405T>A          | Silent            | HEXB    | p.P324P   | hexosaminidase B (beta    | 36 (0.03)  | 75 (0.55)  | 1.46 |
| 11-10 Area 2 | Gp3 | g.chr1:114483675C>A         | Missense Mutation | HIPK1   | p.H224N   | homeodomain interactin    | 49 (0.00)  | 28 (0.21)  | 0.57 |
| 11-10 Area 2 | Gp3 | g.chr1:120298203T>C         | Missense Mutation | HMGCS2  | p.D345G   | 3-hydroxy-3-methylglut    | 350 (0.00) | 61 (0.95)  | 2.54 |

|              |     |                               |                   |           |           |                                  |            |            |      |
|--------------|-----|-------------------------------|-------------------|-----------|-----------|----------------------------------|------------|------------|------|
| 11-10 Area 2 | Gp3 | g.chr10:91098875G>T           | Missense Mutation | IFIT3     | p.A155S   | interferon-induced prote         | 64 (0.00)  | 157 (0.94) | 2.51 |
| 11-10 Area 2 | Gp3 | g.chr11:118427653A>G          | Silent            | IFT46     | p.D51D    | intraflagellar transport         | 427 (0.00) | 77 (0.51)  | 1.35 |
| 11-10 Area 2 | Gp3 | g.chr4:143002078T>C           | Intron            | INPP4B    |           | inositol polyphosphate- $\gamma$ | 42 (0.00)  | 201 (0.39) | 1.03 |
| 11-10 Area 2 | Gp3 | g.chr4:143053795C>T           | Intron            | INPP4B    |           | inositol polyphosphate- $\gamma$ | 140 (0.00) | 9 (0.78)   | 2.07 |
| 11-10 Area 2 | Gp3 | g.chr4:143171043C>T           | Intron            | INPP4B    |           | inositol polyphosphate- $\gamma$ | 173 (0.01) | 364 (0.54) | 1.43 |
| 11-10 Area 2 | Gp3 | g.chr4:143171054C>T           | Intron            | INPP4B    |           | inositol polyphosphate- $\gamma$ | 169 (0.01) | 330 (0.56) | 1.49 |
| 11-10 Area 2 | Gp3 | g.chr4:143252964C>T           | Intron            | INPP4B    |           | inositol polyphosphate- $\gamma$ | 42 (0.00)  | 171 (0.99) | 2.64 |
| 11-10 Area 2 | Gp3 | g.chr16:47195728C>A           | Nonsense Mutation | ITFG1     | p.E532*   | integrin alpha FG-GAP            | 39 (0.00)  | 159 (0.28) | 0.75 |
| 11-10 Area 2 | Gp3 | g.chr17:3646895C>G            | Missense Mutation | ITGAE     | p.C779S   | integrin, alpha E (antige        | 50 (0.00)  | 81 (0.98)  | 2.60 |
| 11-10 Area 2 | Gp3 | g.chr8:73849779C>A            | Missense Mutation | KCNB2     | p.P730Q   | potassium voltage-gated          | 147 (0.00) | 321 (0.60) | 1.59 |
| 11-10 Area 2 | Gp3 | g.chr11:128710049G>A          | Silent            | KCNJ1     | p.C30C    | potassium inwardly-rect          | 104 (0.01) | 30 (0.97)  | 2.58 |
| 11-10 Area 2 | Gp3 | g.chr6:138584550C>T           | Missense Mutation | KIAA1244  | p.P644S   | KIAA1244                         | 37 (0.03)  | 104 (0.52) | 1.38 |
| 11-10 Area 2 | Gp3 | g.chr5:154395616A>G           | Missense Mutation | KIF4B     | p.S733G   | kinesin family member            | 15 (0.00)  | 27 (0.44)  | 1.19 |
| 11-10 Area 2 | Gp3 | g.chr3:47308478C>A            | Silent            | KIF9      | p.L252L   | kinesin family member            | 145 (0.00) | 15 (0.93)  | 2.49 |
| 11-10 Area 2 | Gp3 | g.chr19:18779942C>A           | Missense Mutation | KLHL26    | p.Q579K   | kelch-like family memb           | 15 (0.00)  | 31 (0.94)  | 2.49 |
| 11-10 Area 2 | Gp3 | g.chr8:124664537G>A           | Silent            | KLHL38    | p.A210A   | kelch-like family memb           | 93 (0.00)  | 31 (0.35)  | 0.95 |
| 11-10 Area 2 | Gp3 | g.chr3:160219963_160219964del | Frame Shift Del   | KPNA4     | p.PE498fs | karyopherin alpha 4 (im          | 135 (0.00) | 50 (0.98)  | 2.61 |
| 11-10 Area 2 | Gp3 | g.chr12:52882272C>A           | Missense Mutation | KRT6A     | p.D422Y   | keratin 6A                       | 61 (0.00)  | 9 (0.56)   | 1.48 |
| 11-10 Area 2 | Gp3 | g.chr6:112493909C>A           | Missense Mutation | LAMA4     | p.L485F   | laminin, alpha 4                 | 71 (0.00)  | 28 (0.46)  | 1.24 |
| 11-10 Area 2 | Gp3 | g.chr10:98715160G>A           | Missense Mutation | LCOR      | p.M261I   | ligand dependent nuclea          | 58 (0.00)  | 42 (0.98)  | 2.60 |
| 11-10 Area 2 | Gp3 | g.chr14:106940375C>T          | lincRNA           | LINC00221 |           | long intergenic non-prot         | 143 (0.00) | 28 (0.57)  | 1.52 |
| 11-10 Area 2 | Gp3 | g.chr2:141283869G>T           | Missense Mutation | LRP1B     | p.P2605T  | low density lipoprotein          | 156 (0.00) | 86 (0.99)  | 2.64 |
| 11-10 Area 2 | Gp3 | g.chr12:12318094G>T           | Silent            | LRP6      | p.R561R   | low density lipoprotein          | 112 (0.00) | 120 (0.99) | 2.12 |
| 11-10 Area 2 | Gp3 | g.chr1:235993708C>T           | Missense Mutation | LYST      | p.D4N     | lysosomal trafficking re         | 65 (0.00)  | 121 (0.29) | 0.77 |
| 11-10 Area 2 | Gp3 | g.chr12:9098021G>A            | Silent            | M6PR      | p.F112F   | mannose-6-phosphate re           | 16 (0.00)  | 64 (0.47)  | 1.00 |
| 11-10 Area 2 | Gp3 | g.chr7:77805268G>A            | Intron            | MAGI2     |           | membrane associated gu           | 78 (0.01)  | 198 (0.25) | 0.66 |
| 11-10 Area 2 | Gp3 | g.chr7:77823669G>A            | Intron            | MAGI2     |           | membrane associated gu           | 143 (0.01) | 38 (0.97)  | 2.60 |
| 11-10 Area 2 | Gp3 | g.chr7:77860844G>A            | Intron            | MAGI2     |           | membrane associated gu           | 183 (0.01) | 93 (0.42)  | 1.12 |
| 11-10 Area 2 | Gp3 | g.chr7:78024547A>G            | Intron            | MAGI2     |           | membrane associated gu           | 30 (0.00)  | 45 (0.96)  | 2.55 |
| 11-10 Area 2 | Gp3 | g.chr7:78024628A>G            | Intron            | MAGI2     |           | membrane associated gu           | 44 (0.00)  | 82 (0.99)  | 2.63 |
| 11-10 Area 2 | Gp3 | g.chr7:78400475C>T            | Intron            | MAGI2     |           | membrane associated gu           | 61 (0.00)  | 9 (0.89)   | 2.37 |
| 11-10 Area 2 | Gp3 | g.chr7:79002060G>A            | Intron            | MAGI2     |           | membrane associated gu           | 84 (0.00)  | 141 (0.17) | 0.45 |
| 11-10 Area 2 | Gp3 | g.chr15:52356876G>A           | Silent            | MAPK6     | p.K615K   | mitogen-activated protei         | 104 (0.00) | 46 (0.93)  | 2.49 |
| 11-10 Area 2 | Gp3 | g.chr11:63668126_63668127del  | Frame Shift Del   | MARK2     | p.P256fs  | MAP/microtubule affini           | 438 (0.00) | 197 (0.94) | 2.52 |
| 11-10 Area 2 | Gp3 | g.chr2:198571617C>T           | Silent            | MARS2     | p.N496N   | methionyl-tRNA synthe            | 42 (0.00)  | 94 (0.49)  | 1.30 |

|              |     |                            |                   |             |            |                            |            |            |      |
|--------------|-----|----------------------------|-------------------|-------------|------------|----------------------------|------------|------------|------|
| 11-10 Area 2 | Gp3 | g.chr7:116403181C>T        | Silent            | MET         | p.P832P    | MET proto-oncogene, r      | 62 (0.00)  | 9 (0.89)   | 2.37 |
| 11-10 Area 2 | Gp3 | g.chr7:131071990A>T        | Missense Mutation | MKLN1       | p.N94Y     | muskelin 1, intracellular  | 49 (0.02)  | 107 (0.78) | 2.07 |
| 11-10 Area 2 | Gp3 | g.chr21:37741753_37741754  | In Frame Del      | MORC3       | p.696_697L | MORC family CW-type        | 75 (0.00)  | 80 (0.88)  | 2.33 |
| 11-10 Area 2 | Gp3 | g.chr11:118107941G>A       | Missense Mutation | MPZL3       | p.T80I     | myelin protein zero-like   | 129 (0.00) | 139 (0.47) | 1.25 |
| 11-10 Area 2 | Gp3 | g.chr7:100648662C>T        | Missense Mutation | MUC12       | p.P5083S   | mucin 12, cell surface a   | 151 (0.00) | 180 (0.16) | 0.41 |
| 11-10 Area 2 | Gp3 | g.chr19:9048895A>C         | Missense Mutation | MUC16       | p.S10912R  | mucin 16, cell surface a   | 120 (0.01) | 115 (0.71) | 1.90 |
| 11-10 Area 2 | Gp3 | g.chr2:171264276G>A        | Missense Mutation | MYO3B       | p.A858T    | myosin IIIB                | 223 (0.00) | 18 (0.94)  | 2.52 |
| 11-10 Area 2 | Gp3 | g.chr5:150056321G>A        | Missense Mutation | MYOZ3       | p.G214S    | myozenin 3                 | 66 (0.00)  | 131 (0.63) | 1.67 |
| 11-10 Area 2 | Gp3 | g.chr20:62839452_62839453  | Frame Shift Del   | MYT1        | p.EE301fs  | myelin transcription fac   | 27 (0.00)  | 36 (0.44)  | 1.19 |
| 11-10 Area 2 | Gp3 | g.chr20:62839469C>A        | Missense Mutation | MYT1        | p.A307E    | myelin transcription fac   | 29 (0.00)  | 14 (0.36)  | 0.95 |
| 11-10 Area 2 | Gp3 | g.chr3:113440685G>A        | Silent            | NAA50       | p.P144P    | N(alpha)-acetyltransfera   | 23 (0.00)  | 77 (0.92)  | 2.46 |
| 11-10 Area 2 | Gp3 | g.chr12:6626536C>A         | Silent            | NCAPD2      | p.L397L    | non-SMC condensin I c      | 99 (0.00)  | 116 (0.66) | 1.42 |
| 11-10 Area 2 | Gp3 | g.chr10:75563357G>A        | Missense Mutation | NDST2       | p.A706V    | N-deacetylase/N-sulfotr    | 27 (0.00)  | 25 (0.20)  | 0.53 |
| 11-10 Area 2 | Gp3 | g.chr4:1991530G>A          | Missense Mutation | NELFA       | p.T150M    | negative elongation fact   | 86 (0.01)  | 35 (0.40)  | 1.07 |
| 11-10 Area 2 | Gp3 | g.chr4:103505913_10350592  | Frame Shift Del   | NFKB1       | p.R336fs   | nuclear factor of kappa l  | 41 (0.00)  | 86 (0.98)  | 2.60 |
| 11-10 Area 2 | Gp3 | g.chr5:43700256G>A         | Missense Mutation | NNT         | p.G971D    | nicotinamide nucleotide    | 83 (0.00)  | 172 (0.99) | 2.65 |
| 11-10 Area 2 | Gp3 | g.chr17:65734419G>A        | Missense Mutation | NOL11       | p.E571K    | nucleolar protein 11       | 86 (0.01)  | 279 (0.26) | 0.70 |
| 11-10 Area 2 | Gp3 | g.chr2:203152388C>A        | Missense Mutation | NOP58       | p.S147Y    | NOP58 ribonucleoprote      | 26 (0.00)  | 158 (0.40) | 1.06 |
| 11-10 Area 2 | Gp3 | g.chr1:162313635T>C        | Missense Mutation | NOS1AP      | p.M155T    | nitric oxide synthase 1 (  | 56 (0.00)  | 39 (0.26)  | 0.68 |
| 11-10 Area 2 | Gp3 | g.chr2:184024295C>A        | Missense Mutation | NUP35       | p.T273K    | nucleoporin 35kDa          | 24 (0.00)  | 51 (0.57)  | 1.52 |
| 11-10 Area 2 | Gp3 | g.chr1:247752291T>A        | Silent            | OR2G2       | p.L210L    | olfactory receptor, famil  | 43 (0.00)  | 31 (0.97)  | 2.58 |
| 11-10 Area 2 | Gp3 | g.chr11:5863126A>G         | Splice Site       | OR52E6      | p.M1T      | olfactory receptor, famil  | 190 (0.01) | 168 (0.18) | 0.49 |
| 11-10 Area 2 | Gp3 | g.chr11:4608295C>T         | Missense Mutation | OR52I2      | p.R85W     | olfactory receptor, famil  | 251 (0.00) | 556 (0.22) | 0.58 |
| 11-10 Area 2 | Gp3 | g.chr12:55886529C>T        | Missense Mutation | OR6C68      | p.A123V    | olfactory receptor, famil  | 47 (0.00)  | 11 (0.73)  | 1.94 |
| 11-10 Area 2 | Gp3 | g.chr11:123676169C>T       | Missense Mutation | OR6M1       | p.V297M    | olfactory receptor, famil  | 23 (0.04)  | 118 (0.98) | 2.62 |
| 11-10 Area 2 | Gp3 | g.chr2:179226447A>G        | Missense Mutation | OSBPL6      | p.I423V    | oxysterol binding protei   | 53 (0.00)  | 81 (0.58)  | 1.55 |
| 11-10 Area 2 | Gp3 | g.chr1:26314775T>A         | Silent            | PAFAH2      | p.T96T     | platelet-activating factor | 53 (0.00)  | 82 (0.98)  | 2.60 |
| 11-10 Area 2 | Gp3 | g.chr9:112686021_112686022 | Frame Shift Del   | PALM2-AKAP1 | p.Q89fs    | PALM2-AKAP2 readth         | 34 (0.00)  | 24 (0.88)  | 2.33 |
| 11-10 Area 2 | Gp3 | g.chr5:140572607A>G        | Missense Mutation | PCDHB10     | p.D161G    | protocadherin beta 10      | 157 (0.01) | 150 (0.23) | 0.62 |
| 11-10 Area 2 | Gp3 | g.chr13:113832532G>T       | Missense Mutation | PCID2       | p.P394T    | PCI domain containing      | 30 (0.00)  | 40 (0.40)  | 1.07 |
| 11-10 Area 2 | Gp3 | g.chr12:130847567G>T       | Missense Mutation | PIWIL1      | p.E691D    | piwi-like RNA-mediate      | 62 (0.00)  | 104 (0.27) | 0.72 |
| 11-10 Area 2 | Gp3 | g.chr16:81198225C>A        | RNA               | PKD1L2      |            | polycystic kidney diseas   | 47 (0.00)  | 10 (0.80)  | 2.13 |
| 11-10 Area 2 | Gp3 | g.chr2:159477503C>T        | Splice Site       | PKP4        | p.D94D     | plakophilin 4              | 83 (0.00)  | 86 (0.34)  | 0.90 |
| 11-10 Area 2 | Gp3 | g.chr14:77751910C>A        | Silent            | POMT2       | p.R466R    | protein-O-mannosyltran     | 47 (0.02)  | 17 (0.76)  | 2.04 |
| 11-10 Area 2 | Gp3 | g.chr1:13219539C>A         | Nonsense Mutation | PRAMEF26    | p.E15*     | PRAME family membe         | 236 (0.00) | 53 (0.98)  | 2.62 |

|              |     |                              |                   |               |          |                                                    |            |            |      |
|--------------|-----|------------------------------|-------------------|---------------|----------|----------------------------------------------------|------------|------------|------|
| 11-10 Area 2 | Gp3 | g.chr10:6527177C>T           | Missense Mutation | PRKCCQ        | p.G319S  | protein kinase C, theta                            | 74 (0.00)  | 32 (0.38)  | 1.00 |
| 11-10 Area 2 | Gp3 | g.chr11:60668994C>T          | Missense Mutation | PRPF19        | p.V182M  | pre-mRNA processing factor                         | 45 (0.00)  | 23 (0.91)  | 2.43 |
| 11-10 Area 2 | Gp3 | g.chr15:55916569T>A          | Missense Mutation | PRTG          | p.I1022F | protogenin                                         | 37 (0.00)  | 26 (0.19)  | 0.51 |
| 11-10 Area 2 | Gp3 | g.chr19:43382219C>T          | Silent            | PSG1          | p.G92G   | pregnancy specific beta-2-microglobulin            | 98 (0.01)  | 117 (0.22) | 0.59 |
| 11-10 Area 2 | Gp3 | g.chr10:89688456A>G          | Intron            | PTEN          |          | phosphatase and tensin 1                           | 127 (0.00) | 102 (0.83) | 2.22 |
| 11-10 Area 2 | Gp3 | g.chr1:44085377G>A           | Silent            | PTPRF         | p.T1644T | protein tyrosine phosphatase                       | 31 (0.00)  | 27 (0.96)  | 2.57 |
| 11-10 Area 2 | Gp3 | g.chr19:55711617G>T          | Silent            | PTPRH         | p.V469V  | protein tyrosine phosphatase                       | 33 (0.00)  | 16 (0.50)  | 1.33 |
| 11-10 Area 2 | Gp3 | g.chr2:109383168G>A          | Missense Mutation | RANBP2        | p.G2058E | RAN binding protein 2                              | 365 (0.00) | 117 (0.98) | 2.62 |
| 11-10 Area 2 | Gp3 | g.chr5:130841099C>T          | Silent            | RAPGEF6       | p.Q353Q  | Rap guanine nucleotide exchange factor 6           | 36 (0.00)  | 291 (0.24) | 0.65 |
| 11-10 Area 2 | Gp3 | g.chr13:48908527C>A          | Intron            | RB1           |          | retinoblastoma 1                                   | 73 (0.01)  | 149 (0.70) | 1.88 |
| 11-10 Area 2 | Gp3 | g.chr13:48920051_48920051C>T | Intron            | RB1           |          | retinoblastoma 1                                   | 66 (0.00)  | 101 (0.66) | 1.77 |
| 11-10 Area 2 | Gp3 | g.chr2:152289658A>G          | Silent            | RIF1          | p.T331T  | replication timing regulator                       | 17 (0.00)  | 67 (0.49)  | 1.31 |
| 11-10 Area 2 | Gp3 | g.chr18:110349G>T            | RNA               | ROCK1P1       |          | Rho-associated, coiled-coil domain containing 1    | 63 (0.02)  | 23 (0.22)  | 0.58 |
| 11-10 Area 2 | Gp3 | g.chr9:41963928T>A           | lincRNA           | RP11-204M4.2  |          |                                                    | 371 (0.00) | 186 (0.99) | 2.65 |
| 11-10 Area 2 | Gp3 | g.chr17:17505615A>G          | RNA               | RP11-524F11.2 |          |                                                    | 15 (0.00)  | 9 (0.78)   | 2.07 |
| 11-10 Area 2 | Gp3 | g.chr14:20146889G>A          | lincRNA           | RP11-597A11.6 |          |                                                    | 82 (0.01)  | 132 (0.57) | 1.52 |
| 11-10 Area 2 | Gp3 | g.chr8:10466244C>T           | Silent            | RP1L1         | p.G1788G | retinitis pigmentosa 1-like 1                      | 30 (0.00)  | 33 (0.97)  | 2.59 |
| 11-10 Area 2 | Gp3 | g.chr1:59361222G>A           | lincRNA           | RP4-794H19.1  |          |                                                    | 15 (0.00)  | 15 (0.93)  | 2.49 |
| 11-10 Area 2 | Gp3 | g.chr1:59361227G>A           | lincRNA           | RP4-794H19.1  |          |                                                    | 15 (0.00)  | 17 (0.94)  | 2.51 |
| 11-10 Area 2 | Gp3 | g.chr22:39711388C>G          | Missense Mutation | RPL3          | p.G225A  | ribosomal protein L3                               | 84 (0.00)  | 37 (0.24)  | 0.65 |
| 11-10 Area 2 | Gp3 | g.chr8:99057190_99057190C>T  | Frame Shift Del   | RPL30         | p.AN49fs | ribosomal protein L30                              | 173 (0.00) | 55 (0.96)  | 2.57 |
| 11-10 Area 2 | Gp3 | g.chr11:77412683C>G          | Missense Mutation | RSF1          | p.E531Q  | remodeling and spacing factor                      | 209 (0.00) | 49 (0.98)  | 2.61 |
| 11-10 Area 2 | Gp3 | g.chr11:65731576C>T          | Silent            | SART1         | p.A115A  | squamous cell carcinoma antigen 1                  | 18 (0.00)  | 17 (0.88)  | 2.35 |
| 11-10 Area 2 | Gp3 | g.chr11:121174149G>A         | Nonsense Mutation | SC5D          | p.W22*   | sterol-C5-desaturase                               | 104 (0.00) | 13 (0.46)  | 1.23 |
| 11-10 Area 2 | Gp3 | g.chr11:121174150G>T         | Missense Mutation | SC5D          | p.W22C   | sterol-C5-desaturase                               | 107 (0.00) | 14 (0.43)  | 1.14 |
| 11-10 Area 2 | Gp3 | g.chr12:109017877G>T         | Silent            | SELPLG        | p.T85T   | selectin P ligand                                  | 21 (0.00)  | 114 (0.18) | 0.47 |
| 11-10 Area 2 | Gp3 | g.chr3:72860243G>A           | Intron            | SHQ1          |          | SHQ1, H/ACA ribonucleoprotein                      | 36 (0.03)  | 380 (0.78) | 2.07 |
| 11-10 Area 2 | Gp3 | g.chr22:32614606C>T          | Silent            | SLC5A4        | p.K625K  | solute carrier family 5 (sodium-dependent)         | 62 (0.00)  | 108 (0.85) | 2.27 |
| 11-10 Area 2 | Gp3 | g.chr13:88328385G>T          | Missense Mutation | SLITRK5       | p.D248Y  | SLIT and NTRK-like family 5 member 5               | 31 (0.00)  | 33 (0.55)  | 1.45 |
| 11-10 Area 2 | Gp3 | g.chr2:241991773C>A          | Splice Site       | SNED1         | p.A657A  | sushi, nidogen and EGF repeat domain containing 1  | 17 (0.00)  | 226 (0.46) | 1.23 |
| 11-10 Area 2 | Gp3 | g.chr1:16260257C>A           | Missense Mutation | SPEN          | p.P2508T | spen family transcription factor                   | 38 (0.00)  | 11 (0.73)  | 1.94 |
| 11-10 Area 2 | Gp3 | g.chr17:47681620T>C          | Intron            | SPOP          |          | speckle-type POZ protein                           | 90 (0.01)  | 92 (0.99)  | 2.06 |
| 11-10 Area 2 | Gp3 | g.chr17:47725324A>T          | Intron            | SPOP          |          | speckle-type POZ protein                           | 71 (0.00)  | 58 (0.98)  | 2.04 |
| 11-10 Area 2 | Gp3 | g.chr12:57492812C>A          | Missense Mutation | STAT6         | p.K537N  | signal transducer and activator of transcription 6 | 135 (0.00) | 93 (0.24)  | 0.63 |
| 11-10 Area 2 | Gp3 | g.chr7:87910242G>A           | Silent            | STEAP4        | p.F379F  | STEAP family member                                | 135 (0.01) | 96 (0.72)  | 1.92 |

|              |     |                            |                   |         |          |                                                                |            |      |
|--------------|-----|----------------------------|-------------------|---------|----------|----------------------------------------------------------------|------------|------|
| 11-10 Area 2 | Gp3 | g.chr3:121137250T>A        | Missense Mutation | STXBP5L | p.I1122K | syntaxin binding protein41 (0.00)                              | 138 (0.75) | 1.99 |
| 11-10 Area 2 | Gp3 | g.chr8:38677214C>T         | Missense Mutation | TACC1   | p.P151L  | transforming, acidic coil77 (0.00)                             | 298 (0.32) | 0.84 |
| 11-10 Area 2 | Gp3 | g.chr2:162274741C>T        | Missense Mutation | TBR1    | p.P293S  | T-box, brain, 1 53 (0.00)                                      | 10 (0.90)  | 2.40 |
| 11-10 Area 2 | Gp3 | g.chr7:139636024G>T        | Missense Mutation | TBXAS1  | p.S123I  | thromboxane A synthase29 (0.00)                                | 35 (0.71)  | 1.90 |
| 11-10 Area 2 | Gp3 | g.chr4:183713942G>T        | Silent            | TENM3   | p.L2039L | teneurin transmembrane265 (0.00)                               | 134 (0.97) | 2.59 |
| 11-10 Area 2 | Gp3 | g.chr17:62265796G>T        | Splice Site       | TEX2    | p.A726D  | testis expressed 2 26 (0.00)                                   | 33 (0.21)  | 0.57 |
| 11-10 Area 2 | Gp3 | g.chr1:43783614A>G         | Silent            | TIE1    | p.K931K  | tyrosine kinase with imr 133 (0.00)                            | 196 (0.20) | 0.53 |
| 11-10 Area 2 | Gp3 | g.chr10:63195929T>C        | Splice Site       | TMEM26  | p.Q90R   | transmembrane protein 220 (0.00)                               | 40 (0.53)  | 1.40 |
| 11-10 Area 2 | Gp3 | g.chr3:36897445A>T         | Silent            | TRANK1  | p.S662S  | tetatricopeptide repeat 142 (0.01)                             | 52 (0.96)  | 2.56 |
| 11-10 Area 2 | Gp3 | g.chr7:142428870G>T        | RNA               | TRBV28  |          | T cell receptor beta variable 75 (0.00)                        | 32 (0.28)  | 0.75 |
| 11-10 Area 2 | Gp3 | g.chr6:42196349C>T         | Missense Mutation | TRERF1  | p.E1113K | transcriptional regulator 63 (0.00)                            | 22 (0.91)  | 2.42 |
| 11-10 Area 2 | Gp3 | g.chr15:45059481C>A        | Silent            | TRIM69  | p.L338L  | tripartite motif containing 65 (0.02)                          | 24 (0.54)  | 1.44 |
| 11-10 Area 2 | Gp3 | g.chr9:135797312G>A        | Missense Mutation | TSC1    | p.A186V  | tuberous sclerosis 1 106 (0.01)                                | 34 (0.91)  | 2.43 |
| 11-10 Area 2 | Gp3 | g.chr9:135797337C>A        | Missense Mutation | TSC1    | p.V178F  | tuberous sclerosis 1 122 (0.01)                                | 35 (0.91)  | 2.44 |
| 11-10 Area 2 | Gp3 | g.chr6:158923037G>C        | Missense Mutation | TULP4   | p.G781A  | tubby like protein 4 68 (0.01)                                 | 211 (0.40) | 1.06 |
| 11-10 Area 2 | Gp3 | g.chr6:42620252C>T         | Missense Mutation | UBR2    | p.P880S  | ubiquitin protein ligase 116 (0.00)                            | 54 (0.85)  | 2.27 |
| 11-10 Area 2 | Gp3 | g.chr1:45478979C>A         | Missense Mutation | UROD    | p.P77T   | uroporphyrinogen decarboxylase 42 (0.00)                       | 81 (0.41)  | 1.09 |
| 11-10 Area 2 | Gp3 | g.chr17:9604667A>G         | Splice Site       | USP43   |          | ubiquitin specific peptidase 23 (0.00)                         | 81 (0.17)  | 0.46 |
| 11-10 Area 2 | Gp3 | g.chr11:11913582C>A        | Missense Mutation | USP47   | p.S162Y  | ubiquitin specific peptidase 60 (0.02)                         | 446 (0.29) | 0.77 |
| 11-10 Area 2 | Gp3 | g.chr9:2643450G>A          | Missense Mutation | VLDLR   | p.G247S  | very low density lipoprotein receptor class B member 19 (0.00) | 18 (0.83)  | 2.22 |
| 11-10 Area 2 | Gp3 | g.chr8:100831041T>C        | Missense Mutation | VPS13B  | p.I2874T | vacuolar protein sorting 17 (0.00)                             | 84 (0.19)  | 0.51 |
| 11-10 Area 2 | Gp3 | g.chr2:20153627C>A         | Missense Mutation | WDR35   | p.Q456H  | WD repeat domain 35 120 (0.01)                                 | 10 (0.80)  | 2.13 |
| 11-10 Area 2 | Gp3 | g.chr5:112889360G>T        | Missense Mutation | YTHDC2  | p.K647N  | YTH domain containing 87 (0.00)                                | 20 (0.50)  | 1.33 |
| 11-10 Area 2 | Gp3 | g.chr7:100365567C>T        | RNA               | ZAN     |          | zonadhesin (gene/pseudogene) 36 (0.00)                         | 52 (0.98)  | 2.62 |
| 11-10 Area 2 | Gp3 | g.chr1:203807112C>A        | Missense Mutation | ZC3H11A | p.P298Q  | zinc finger CCCH-type 102 (0.01)                               | 32 (0.19)  | 0.50 |
| 11-10 Area 2 | Gp3 | g.chr9:88959923G>T         | Silent            | ZCCHC6  | p.I322I  | zinc finger, CCHC domain 32 (0.00)                             | 18 (0.94)  | 2.52 |
| 11-10 Area 2 | Gp3 | g.chr9:88959941C>T         | Silent            | ZCCHC6  | p.R316R  | zinc finger, CCHC domain 31 (0.00)                             | 9 (0.89)   | 2.37 |
| 11-10 Area 2 | Gp3 | g.chr2:207171551C>A        | Missense Mutation | ZDBF2   | p.L767M  | zinc finger, DBF-type class 193 (0.00)                         | 38 (0.16)  | 0.42 |
| 11-10 Area 2 | Gp3 | g.chr11:9499982_9499983del | Frame Shift Del   | ZNF143  | p.G112fs | zinc finger protein 143 50 (0.00)                              | 189 (0.94) | 2.51 |
| 11-10 Area 2 | Gp3 | g.chr17:15620481C>T        | Silent            | ZNF286A | p.L481L  | zinc finger protein 286A38 (0.00)                              | 22 (0.91)  | 2.42 |
| 11-10 Area 2 | Gp3 | g.chr19:37117415C>T        | Nonsense Mutation | ZNF382  | p.Q205*  | zinc finger protein 382 68 (0.00)                              | 17 (0.94)  | 2.51 |
| 11-10 Area 2 | Gp3 | g.chr3:21706412G>T         | Missense Mutation | ZNF385D | p.A44E   | zinc finger protein 385E27 (0.00)                              | 139 (0.47) | 1.27 |
| 11-10 Area 2 | Gp3 | g.chr19:58929145C>T        | Silent            | ZNF584  | p.S420S  | zinc finger protein 584 38 (0.00)                              | 52 (0.23)  | 0.62 |
| 11-10 Area 2 | Gp3 | g.chr17:3969771C>A         | Nonsense Mutation | ZZEF1   | p.E1407* | zinc finger, ZZ-type with zinc ion binding 156 (0.01)          | 19 (0.58)  | 1.54 |
| 11-10 Area 2 | Gp4 | g.chr16:48130672C>A        | Missense Mutation | ABCC12  | p.L1060F | ATP-binding cassette, subfamily B, member 172 (0.01)           | 71 (0.21)  | 0.56 |

|              |     |                                |                   |          |           |                                                   |            |      |
|--------------|-----|--------------------------------|-------------------|----------|-----------|---------------------------------------------------|------------|------|
| 11-10 Area 2 | Gp4 | g.chr3:183699544C>T            | Nonsense Mutation | ABCC5    | p.W373*   | ATP-binding cassette, s150 (0.00)                 | 20 (0.90)  | 2.40 |
| 11-10 Area 2 | Gp4 | g.chr12:40013054_40013054del   | Frame Shift Del   | ABCD2    | p.S1121fs | ATP-binding cassette, s148 (0.00)                 | 56 (0.62)  | 1.67 |
| 11-10 Area 2 | Gp4 | g.chr12:40013070T>A            | Silent            | ABCD2    | p.S116S   | ATP-binding cassette, s172 (0.00)                 | 25 (0.76)  | 2.03 |
| 11-10 Area 2 | Gp4 | g.chr9:133738271C>T            | Missense Mutation | ABL1     | p.T224I   | ABL proto-oncogene 1, 79 (0.00)                   | 18 (0.72)  | 1.93 |
| 11-10 Area 2 | Gp4 | g.chr6:160196277C>G            | Missense Mutation | ACAT2    | p.T189R   | acetyl-CoA acetyltransferase 54 (0.00)            | 25 (0.64)  | 1.71 |
| 11-10 Area 2 | Gp4 | g.chr20:44472344C>A            | Missense Mutation | ACOT8    | p.K221N   | acyl-CoA thioesterase 8 17 (0.00)                 | 46 (0.72)  | 1.91 |
| 11-10 Area 2 | Gp4 | g.chr3:64644397C>T             | Silent            | ADAMTS9  | p.L250L   | ADAM metallopeptidase 56 (0.02)                   | 13 (0.77)  | 2.05 |
| 11-10 Area 2 | Gp4 | g.chr10:88761367T>C            | RNA               | AGAP11   |           | ankyrin repeat and GTP-binding domain 326 (0.00)  | 204 (0.22) | 0.59 |
| 11-10 Area 2 | Gp4 | g.chr1:247040534G>T            | Missense Mutation | AHCTF1   | p.H946N   | AT hook containing transcription factor 41 (0.00) | 34 (0.29)  | 0.78 |
| 11-10 Area 2 | Gp4 | g.chr3:186330969C>G            | Silent            | AHSG     | p.L13L    | alpha-2-HS-glycoprotein 26 (0.00)                 | 40 (0.97)  | 2.60 |
| 11-10 Area 2 | Gp4 | g.chr14:96924498G>A            | Missense Mutation | AK7      | p.D436N   | adenylate kinase 7 27 (0.00)                      | 19 (0.47)  | 1.26 |
| 11-10 Area 2 | Gp4 | g.chr15:86270399G>A            | Missense Mutation | AKAP13   | p.E2313K  | A kinase (PRKA) anchoring protein 46 (0.00)       | 34 (0.74)  | 1.96 |
| 11-10 Area 2 | Gp4 | g.chr9:38395790G>A             | Silent            | ALDH1B1  | p.R15R    | aldehyde dehydrogenase class 1B 26 (0.00)         | 95 (0.99)  | 2.64 |
| 11-10 Area 2 | Gp4 | g.chr4:114277470C>A            | Missense Mutation | ANK2     | p.H2533N  | ankyrin 2, neuronal 92 (0.00)                     | 12 (0.75)  | 2.00 |
| 11-10 Area 2 | Gp4 | g.chr17:64212969C>A            | Missense Mutation | APOH     | p.D241Y   | apolipoprotein H (beta-2) 65 (0.00)               | 26 (0.23)  | 0.62 |
| 11-10 Area 2 | Gp4 | g.chr11:110450268_110450268del | Frame Shift Del   | ARHGAP20 | p.K677fs  | Rho GTPase activating protein 19 (0.00)           | 17 (0.59)  | 1.57 |
| 11-10 Area 2 | Gp4 | g.chr12:58008371G>A            | Missense Mutation | ARHGEF25 | p.G306R   | Rho guanine nucleotide exchange factor 25 (0.00)  | 35 (0.66)  | 1.75 |
| 11-10 Area 2 | Gp4 | g.chr12:58008374G>A            | Missense Mutation | ARHGEF25 | p.D307N   | Rho guanine nucleotide exchange factor 24 (0.00)  | 35 (0.66)  | 1.75 |
| 11-10 Area 2 | Gp4 | g.chr19:12856303G>A            | Missense Mutation | ASNA1    | p.G141D   | arsA arsenite transporter 16 (0.00)               | 13 (0.92)  | 2.46 |
| 11-10 Area 2 | Gp4 | g.chr18:55368298C>A            | Missense Mutation | ATP8B1   | p.R176M   | ATPase, aminophosphotransferase 60 (0.00)         | 18 (0.44)  | 1.19 |
| 11-10 Area 2 | Gp4 | g.chr1:154316398G>A            | Silent            | ATP8B2   | p.L629L   | ATPase, aminophosphotransferase 20 (0.00)         | 10 (0.60)  | 1.60 |
| 11-10 Area 2 | Gp4 | g.chr1:110033653C>A            | Missense Mutation | ATXN7L2  | p.L490M   | ataxin 7-like 2 42 (0.00)                         | 144 (0.99) | 2.65 |
| 11-10 Area 2 | Gp4 | g.chr12:58203454C>T            | Missense Mutation | AVIL     | p.G289R   | advillin 48 (0.00)                                | 21 (0.90)  | 2.41 |
| 11-10 Area 2 | Gp4 | g.chr15:91272861C>A            | Intron            | BLM      |           | Bloom syndrome, RecQ 23 (0.00)                    | 20 (0.30)  | 0.80 |
| 11-10 Area 2 | Gp4 | g.chr17:28599876G>T            | Missense Mutation | BLMH     | p.N281K   | bleomycin hydrolase 81 (0.00)                     | 94 (0.96)  | 2.55 |
| 11-10 Area 2 | Gp4 | g.chr19:55805469G>A            | Silent            | BRSK1    | p.Q181Q   | BR serine/threonine kinase 36 (0.03)              | 61 (0.98)  | 2.62 |
| 11-10 Area 2 | Gp4 | g.chr3:49693118G>A             | Silent            | BSN      | p.T2043T  | bassoon presynaptic cytoskeleton 77 (0.01)        | 28 (0.86)  | 2.29 |
| 11-10 Area 2 | Gp4 | g.chr6:26368983G>T             | Silent            | BTN3A2   | p.P92P    | butyrophilin, subfamily 256 (0.00)                | 123 (0.23) | 0.61 |
| 11-10 Area 2 | Gp4 | g.chr12:4627389A>T             | Missense Mutation | C12orf4  | p.L290M   | chromosome 12 open reading frame 118 (0.00)       | 40 (0.97)  | 2.60 |
| 11-10 Area 2 | Gp4 | g.chr16:1470338_1470339del     | Frame Shift Del   | C16orf91 | p.Q103fs  | chromosome 16 open reading frame 15 (0.00)        | 26 (0.96)  | 2.56 |
| 11-10 Area 2 | Gp4 | g.chr19:36255952C>T            | Missense Mutation | C19orf55 | p.S215F   | 54 (0.00)                                         | 133 (0.59) | 1.58 |
| 11-10 Area 2 | Gp4 | g.chr2:191064793C>A            | Silent            | C2orf88  | p.I69I    | chromosome 2 open reading frame 143 (0.01)        | 116 (0.97) | 2.60 |
| 11-10 Area 2 | Gp4 | g.chr9:100678484T>C            | Silent            | C9orf156 | p.E71E    | chromosome 9 open reading frame 107 (0.01)        | 43 (0.28)  | 0.74 |
| 11-10 Area 2 | Gp4 | g.chr3:85393734G>A             | Intron            | CADM2    |           | cell adhesion molecule 2 19 (0.00)                | 140 (0.79) | 2.10 |
| 11-10 Area 2 | Gp4 | g.chr3:85399657G>A             | Intron            | CADM2    |           | cell adhesion molecule 2 46 (0.00)                | 110 (0.86) | 2.30 |

|              |     |                                |                   |          |          |                                                  |            |      |
|--------------|-----|--------------------------------|-------------------|----------|----------|--------------------------------------------------|------------|------|
| 11-10 Area 2 | Gp4 | g.chr3:85621721G>A             | Intron            | CADM2    |          | cell adhesion molecule 237 (0.03)                | 173 (0.32) | 0.86 |
| 11-10 Area 2 | Gp4 | g.chr3:85739720G>A             | Intron            | CADM2    |          | cell adhesion molecule 260 (0.02)                | 37 (0.86)  | 2.31 |
| 11-10 Area 2 | Gp4 | g.chr3:85927176G>T             | Intron            | CADM2    |          | cell adhesion molecule 233 (0.00)                | 68 (0.44)  | 1.18 |
| 11-10 Area 2 | Gp4 | g.chr10:106130728A>G           | Missense Mutation | CCDC147  | p.K336E  | 20 (0.00)                                        | 154 (0.23) | 0.62 |
| 11-10 Area 2 | Gp4 | g.chr1:159860340T>A            | Missense Mutation | CCDC19   | p.T68S   | 115 (0.00)                                       | 68 (0.19)  | 0.51 |
| 11-10 Area 2 | Gp4 | g.chr17:37627800C>T            | Missense Mutation | CDK12    | p.A572V  | cyclin-dependent kinase 105 (0.01)               | 94 (0.85)  | 2.27 |
| 11-10 Area 2 | Gp4 | g.chr12:96683054C>A            | Missense Mutation | CDK17    | p.A337S  | cyclin-dependent kinase 110 (0.00)               | 42 (0.98)  | 2.60 |
| 11-10 Area 2 | Gp4 | g.chr9:130550317C>T            | Silent            | CDK9     | p.V119V  | cyclin-dependent kinase 71 (0.00)                | 10 (0.90)  | 2.40 |
| 11-10 Area 2 | Gp4 | g.chr4:119459021G>A            | RNA               | CEP170P1 |          | centrosomal protein 170276 (0.00)                | 10 (0.90)  | 2.40 |
| 11-10 Area 2 | Gp4 | g.chr5:98195248C>T             | Intron            | CHD1     |          | chromodomain helicase 89 (0.00)                  | 16 (0.50)  | 1.33 |
| 11-10 Area 2 | Gp4 | g.chr1:6189721A>G              | Intron            | CHD5     |          | chromodomain helicase 30 (0.00)                  | 91 (0.22)  | 0.59 |
| 11-10 Area 2 | Gp4 | g.chr1:6235320_6235320in       | Intron            | CHD5     |          | chromodomain helicase 35 (0.00)                  | 43 (0.47)  | 1.24 |
| 11-10 Area 2 | Gp4 | g.chr18:24496808G>T            | Silent            | CHST9    | p.V249V  | carbohydrate (N-acetylglucosaminidase) 62 (0.00) | 9 (0.56)   | 1.48 |
| 11-10 Area 2 | Gp4 | g.chr3:150659510G>A            | Missense Mutation | CLRN1    | p.H98Y   | clarin 1 33 (0.00)                               | 17 (0.76)  | 2.04 |
| 11-10 Area 2 | Gp4 | g.chr4:78663450C>T             | Splice Site       | CNOT6L   |          | CCR4-NOT transcription factor 51 (0.00)          | 172 (0.60) | 1.61 |
| 11-10 Area 2 | Gp4 | g.chr17:40714878C>T            | Missense Mutation | COASY    | p.H80Y   | CoA synthase 79 (0.01)                           | 164 (0.63) | 1.69 |
| 11-10 Area 2 | Gp4 | g.chr13:40301650A>G            | Missense Mutation | COG6     | p.I597M  | component of oligomerization complex 81 (0.01)   | 50 (0.32)  | 0.85 |
| 11-10 Area 2 | Gp4 | g.chr13:111088624_111088624del | Frame Shift Del   | COL4A2   | p.G246fs | collagen, type IV, alpha 44 (0.00)               | 77 (0.48)  | 1.28 |
| 11-10 Area 2 | Gp4 | g.chr3:130284329C>T            | Nonsense Mutation | COL6A6   | p.Q385*  | collagen, type VI, alpha 56 (0.00)               | 67 (0.88)  | 2.35 |
| 11-10 Area 2 | Gp4 | g.chr16:3807954G>A             | Silent            | CREBBP   | p.D1155D | CREB binding protein 64 (0.02)                   | 121 (0.20) | 0.53 |
| 11-10 Area 2 | Gp4 | g.chr3:97607290G>A             | Silent            | CRYBG3   | p.P517P  | beta-gamma crystallin d 129 (0.00)               | 106 (0.98) | 2.62 |
| 11-10 Area 2 | Gp4 | g.chr10:68940144C>A            | Missense Mutation | CTNNA3   | p.E326D  | catenin (cadherin-associated protein) 106 (0.00) | 66 (0.20)  | 0.53 |
| 11-10 Area 2 | Gp4 | g.chr3:41277291G>A             | Missense Mutation | CTNNB1   | p.R587Q  | catenin (cadherin-associated protein) 83 (0.00)  | 18 (0.78)  | 2.07 |
| 11-10 Area 2 | Gp4 | g.chr1:47399873G>T             | Missense Mutation | CYP4A11  | p.L355M  | cytochrome P450, family 4 subfamily 11 (0.00)    | 26 (0.96)  | 2.56 |
| 11-10 Area 2 | Gp4 | g.chr9:124351296C>T            | Intron            | DAB2IP   |          | DAB2 interacting protein 58 (0.02)               | 231 (0.18) | 0.47 |
| 11-10 Area 2 | Gp4 | g.chr9:124421226T>A            | Intron            | DAB2IP   |          | DAB2 interacting protein 41 (0.02)               | 77 (0.83)  | 2.22 |
| 11-10 Area 2 | Gp4 | g.chr9:124429265G>A            | Intron            | DAB2IP   |          | DAB2 interacting protein 34 (0.03)               | 85 (0.87)  | 2.32 |
| 11-10 Area 2 | Gp4 | g.chr9:124510177G>A            | Intron            | DAB2IP   |          | DAB2 interacting protein 110 (0.00)              | 205 (0.73) | 1.94 |
| 11-10 Area 2 | Gp4 | g.chr1:114454692_114454692del  | Frame Shift Del   | DCLRE1B  | p.L493fs | DNA cross-link repair factor 136 (0.00)          | 32 (0.94)  | 2.50 |
| 11-10 Area 2 | Gp4 | g.chr1:114454714A>T            | Silent            | DCLRE1B  | p.L500L  | DNA cross-link repair factor 135 (0.00)          | 21 (0.95)  | 2.54 |
| 11-10 Area 2 | Gp4 | g.chr13:95114311C>A            | Missense Mutation | DCT      | p.Q332H  | dopachrome tautomerase 66 (0.00)                 | 40 (0.15)  | 0.40 |
| 11-10 Area 2 | Gp4 | g.chr22:38890102T>A            | Nonsense Mutation | DDX17    | p.K417*  | DEAD (Asp-Glu-Ala) 25 (0.00)                     | 11 (0.82)  | 2.18 |
| 11-10 Area 2 | Gp4 | g.chr19:19038822A>C            | Missense Mutation | DDX49    | p.K414Q  | DEAD (Asp-Glu-Ala) 18 (0.00)                     | 46 (0.20)  | 0.52 |
| 11-10 Area 2 | Gp4 | g.chr12:56345524C>T            | Missense Mutation | DGKA     | p.P515L  | diacylglycerol kinase, alpha 1 (0.00)            | 18 (0.89)  | 2.37 |
| 11-10 Area 2 | Gp4 | g.chr15:40659478C>T            | Nonsense Mutation | DISP2    | p.Q389*  | dispatched homolog 2 (150 (0.00)                 | 86 (0.24)  | 0.65 |

|              |     |                         |                   |         |            |                           |            |            |      |
|--------------|-----|-------------------------|-------------------|---------|------------|---------------------------|------------|------------|------|
| 11-10 Area 2 | Gp4 | g.chrX:31227662_3122766 | In Frame Del      | DMD     | p.P3172del | dystrophin                | 34 (0.00)  | 17 (0.76)  | 1.27 |
| 11-10 Area 2 | Gp4 | g.chr5:78328610C>T      | Missense Mutation | DMGDH   | p.G473R    | dimethylglycine dehydr    | 19 (0.00)  | 71 (0.21)  | 0.56 |
| 11-10 Area 2 | Gp4 | g.chr9:22451533G>A      | Missense Mutation | DMRTA1  | p.E380K    | DMRT-like family A1       | 45 (0.00)  | 16 (0.94)  | 2.50 |
| 11-10 Area 2 | Gp4 | g.chr1:15871055C>A      | Missense Mutation | DNAJC16 | p.L246I    | DnaJ (Hsp40) homolog,     | 73 (0.00)  | 147 (0.34) | 0.91 |
| 11-10 Area 2 | Gp4 | g.chr1:63100520_6310052 | Frame Shift Del   | DOCK7   | p.A321fs   | dedicator of cytokines    | 31 (0.00)  | 35 (0.94)  | 2.51 |
| 11-10 Area 2 | Gp4 | g.chr1:221879615C>A     | Missense Mutation | DUSP10  | p.Q335H    | dual specificity phospho  | 177 (0.00) | 96 (0.25)  | 0.67 |
| 11-10 Area 2 | Gp4 | g.chr3:108363485G>T     | Missense Mutation | DZIP3   | p.R539L    | DAZ interacting zinc fir  | 48 (0.00)  | 16 (0.88)  | 2.33 |
| 11-10 Area 2 | Gp4 | g.chr6:139197618G>T     | Missense Mutation | ECT2L   | p.V530F    | epithelial cell transform | 74 (0.00)  | 52 (0.90)  | 2.41 |
| 11-10 Area 2 | Gp4 | g.chr4:148463701C>A     | Silent            | EDNRA   | p.I405I    | endothelin receptor type  | 34 (0.00)  | 39 (0.31)  | 0.82 |
| 11-10 Area 2 | Gp4 | g.chr5:38350681C>A      | Silent            | EGFLAM  | p.R124R    | EGF-like, fibronectin ty  | 62 (0.00)  | 83 (0.75)  | 1.99 |
| 11-10 Area 2 | Gp4 | g.chr3:183855834C>A     | Missense Mutation | EIF2B5  | p.Q219K    | eukaryotic translation in | 67 (0.00)  | 21 (0.90)  | 2.41 |
| 11-10 Area 2 | Gp4 | g.chr10:81272837G>A     | Silent            | EIF5AL1 | p.E144E    | eukaryotic translation in | 82 (0.01)  | 93 (0.33)  | 0.89 |
| 11-10 Area 2 | Gp4 | g.chr17:12905776G>A     | Silent            | ELAC2   | p.L400L    | elaC ribonuclease Z 2     | 20 (0.00)  | 71 (0.58)  | 1.54 |
| 11-10 Area 2 | Gp4 | g.chr22:41546114C>A     | Missense Mutation | EP300   | p.P910H    | E1A binding protein p3(   | 18 (0.00)  | 121 (0.47) | 1.26 |
| 11-10 Area 2 | Gp4 | g.chr22:41574695C>T     | Missense Mutation | EP300   | p.P2327L   | E1A binding protein p3(   | 19 (0.00)  | 17 (0.29)  | 0.78 |
| 11-10 Area 2 | Gp4 | g.chr19:16472630G>A     | Missense Mutation | EPS15L1 | p.P849L    | epidermal growth factor   | 22 (0.00)  | 10 (0.90)  | 2.40 |
| 11-10 Area 2 | Gp4 | g.chr2:212252698G>A     | Missense Mutation | ERBB4   | p.P1052L   | v-erb-b2 avian erythrobl  | 76 (0.00)  | 9 (0.56)   | 1.48 |
| 11-10 Area 2 | Gp4 | g.chrX:71426054C>A      | Nonsense Mutation | ERCC6L  | p.E732*    | excision repair cross-co  | 25 (0.00)  | 35 (0.43)  | 0.71 |
| 11-10 Area 2 | Gp4 | g.chr21:39787582T>A     | Intron            | ERG     |            | v-ets avian erythroblast  | 22 (0.00)  | 87 (0.99)  | 2.64 |
| 11-10 Area 2 | Gp4 | g.chr21:39814511G>T     | Intron            | ERG     |            | v-ets avian erythroblast  | 41 (0.02)  | 165 (0.96) | 2.57 |
| 11-10 Area 2 | Gp4 | g.chr21:39839066T>C     | Intron            | ERG     |            | v-ets avian erythroblast  | 47 (0.02)  | 337 (0.22) | 0.59 |
| 11-10 Area 2 | Gp4 | g.chr21:39957040C>T     | Intron            | ERG     |            | v-ets avian erythroblast  | 51 (0.00)  | 51 (0.73)  | 1.93 |
| 11-10 Area 2 | Gp4 | g.chr2:158178227C>T     | Silent            | ERMN    | p.Q137Q    | ermin, ERM-like proteir   | 21 (0.00)  | 53 (0.66)  | 1.76 |
| 11-10 Area 2 | Gp4 | g.chr1:11147613G>A      | Silent            | EXOSC10 | p.C327C    | exosome component 10      | 213 (0.00) | 34 (0.76)  | 2.04 |
| 11-10 Area 2 | Gp4 | g.chr6:159191874C>T     | Missense Mutation | EZR     | p.E338K    | ezrin                     | 75 (0.00)  | 33 (0.24)  | 0.65 |
| 11-10 Area 2 | Gp4 | g.chr11:58919439G>T     | Nonsense Mutation | FAM111A | p.E100*    | family with sequence sii  | 103 (0.00) | 40 (0.55)  | 1.47 |
| 11-10 Area 2 | Gp4 | g.chr9:130270227C>A     | Nonsense Mutation | FAM129B | p.E525*    | family with sequence sii  | 30 (0.00)  | 15 (0.93)  | 2.49 |
| 11-10 Area 2 | Gp4 | g.chr5:137298091_137298 | Splice Site       | FAM13B  |            | family with sequence sii  | 88 (0.00)  | 36 (0.97)  | 2.59 |
| 11-10 Area 2 | Gp4 | g.chr7:30931594_3093159 | Frame Shift Del   | FAM188B | p.W750fs   | family with sequence sii  | 121 (0.00) | 114 (0.99) | 2.64 |
| 11-10 Area 2 | Gp4 | g.chr4:159092153C>A     | Silent            | FAM198B | p.V125V    | family with sequence sii  | 101 (0.01) | 84 (0.42)  | 1.11 |
| 11-10 Area 2 | Gp4 | g.chr3:10106096C>A      | Silent            | FANCD2  | p.S668S    | Fanconi anemia, comple    | 26 (0.00)  | 34 (0.68)  | 1.80 |
| 11-10 Area 2 | Gp4 | g.chr9:137801800T>C     | Silent            | FCN1    | p.Q275Q    | ficolin (collagen/fibrino | 106 (0.00) | 207 (1.00) | 2.65 |
| 11-10 Area 2 | Gp4 | g.chr9:137801868T>A     | Missense Mutation | FCN1    | p.N253Y    | ficolin (collagen/fibrino | 115 (0.00) | 220 (1.00) | 2.65 |
| 11-10 Area 2 | Gp4 | g.chr9:108370116G>A     | Missense Mutation | FKTN    | p.V222I    | fukutin                   | 112 (0.00) | 168 (0.45) | 1.19 |
| 11-10 Area 2 | Gp4 | g.chr9:14859447A>T      | Missense Mutation | FREM1   | p.I122N    | FRAS1 related extracell   | 152 (0.00) | 16 (0.31)  | 0.83 |



|              |     |                            |                   |         |            |                           |             |            |      |
|--------------|-----|----------------------------|-------------------|---------|------------|---------------------------|-------------|------------|------|
| 11-10 Area 2 | Gp4 | g.chr15:44175990C>T        | Missense Mutation | FRMD5   | p.S349N    | FERM domain containi      | 39 (0.00)   | 12 (0.92)  | 2.44 |
| 11-10 Area 2 | Gp4 | g.chr13:32745264C>A        | Missense Mutation | FRY     | p.L670M    | furry homolog (Drosopl    | 46 (0.00)   | 13 (0.38)  | 1.03 |
| 11-10 Area 2 | Gp4 | g.chr2:208632041G>A        | Missense Mutation | FZD5    | p.R475C    | frizzled class receptor   | 5 15 (0.00) | 20 (0.85)  | 2.27 |
| 11-10 Area 2 | Gp4 | g.chr5:151179522C>G        | Missense Mutation | G3BP1   | p.Q306E    | GTPase activating prote   | 34 (0.00)   | 16 (0.38)  | 1.00 |
| 11-10 Area 2 | Gp4 | g.chr7:127225078C>A        | Missense Mutation | GCC1    | p.E53D     | GRIP and coiled-coil do   | 128 (0.00)  | 14 (0.86)  | 2.29 |
| 11-10 Area 2 | Gp4 | g.chr17:651192G>C          | Missense Mutation | GEMIN4  | p.L31V     | gem (nuclear organelle)   | 17 (0.00)   | 48 (0.98)  | 2.61 |
| 11-10 Area 2 | Gp4 | g.chr2:85783372C>A         | Missense Mutation | GGCX    | p.G184V    | gamma-glutamyl carbox     | 53 (0.02)   | 30 (0.97)  | 2.58 |
| 11-10 Area 2 | Gp4 | g.chr5:102433387G>T        | Silent            | GIN1    | p.I246I    | gypsy retrotransposon ir  | 64 (0.02)   | 163 (0.67) | 1.78 |
| 11-10 Area 2 | Gp4 | g.chr15:75557731G>T        | Missense Mutation | GOLGA6C | p.R242L    | golgin A6 family, memt    | 225 (0.00)  | 14 (0.93)  | 2.48 |
| 11-10 Area 2 | Gp4 | g.chr8:145138381C>A        | Missense Mutation | GPAA1   | p.P115Q    | glycosylphosphatidylin    | 52 (0.00)   | 20 (0.95)  | 2.53 |
| 11-10 Area 2 | Gp4 | g.chr13:27333772C>G        | Missense Mutation | GPR12   | p.V65L     | G protein-coupled recep   | 50 (0.00)   | 31 (0.48)  | 1.29 |
| 11-10 Area 2 | Gp4 | g.chr1:6314703G>A          | Missense Mutation | GPR153  | p.S88F     | G protein-coupled recep   | 20 (0.00)   | 54 (0.30)  | 0.79 |
| 11-10 Area 2 | Gp4 | g.chr13:99908088A>G        | Silent            | GPR18   | p.F13F     | G protein-coupled recep   | 47 (0.00)   | 227 (0.64) | 1.72 |
| 11-10 Area 2 | Gp4 | g.chr3:151012960T>C        | Missense Mutation | GPR87   | p.N25S     | G protein-coupled recep   | 28 (0.00)   | 25 (0.32)  | 0.85 |
| 11-10 Area 2 | Gp4 | g.chrX:51487938C>T         | Missense Mutation | GSPT2   | p.P406S    | G1 to S phase transition  | 44 (0.02)   | 108 (0.85) | 1.42 |
| 11-10 Area 2 | Gp4 | g.chr12:96387880G>T        | Silent            | HAL     | p.R133R    | histidine ammonia-lyase   | 286 (0.00)  | 29 (0.41)  | 1.10 |
| 11-10 Area 2 | Gp4 | g.chr4:174448477C>A        | Missense Mutation | HAND2   | p.G202V    | heart and neural crest de | 40 (0.00)   | 15 (0.87)  | 2.31 |
| 11-10 Area 2 | Gp4 | g.chr7:18548927G>A         | Intron            | HDAC9   |            | histone deacetylase 9     | 103 (0.00)  | 63 (0.19)  | 0.51 |
| 11-10 Area 2 | Gp4 | g.chr7:18557338G>T         | Intron            | HDAC9   |            | histone deacetylase 9     | 153 (0.00)  | 142 (0.39) | 1.05 |
| 11-10 Area 2 | Gp4 | g.chr7:18660447C>A         | Intron            | HDAC9   |            | histone deacetylase 9     | 97 (0.00)   | 20 (0.50)  | 1.33 |
| 11-10 Area 2 | Gp4 | g.chr7:18702043G>A         | Intron            | HDAC9   |            | histone deacetylase 9     | 171 (0.00)  | 65 (0.98)  | 2.63 |
| 11-10 Area 2 | Gp4 | g.chr7:18792350C>A         | Intron            | HDAC9   |            | histone deacetylase 9     | 49 (0.00)   | 31 (0.97)  | 2.58 |
| 11-10 Area 2 | Gp4 | g.chr7:18799811C>T         | Intron            | HDAC9   |            | histone deacetylase 9     | 40 (0.00)   | 17 (0.59)  | 1.57 |
| 11-10 Area 2 | Gp4 | g.chr7:18897321C>T         | Intron            | HDAC9   |            | histone deacetylase 9     | 33 (0.00)   | 25 (0.92)  | 2.45 |
| 11-10 Area 2 | Gp4 | g.chr7:18897323T>G         | Intron            | HDAC9   |            | histone deacetylase 9     | 34 (0.00)   | 25 (0.92)  | 2.45 |
| 11-10 Area 2 | Gp4 | g.chr7:18964929G>A         | Intron            | HDAC9   |            | histone deacetylase 9     | 74 (0.00)   | 17 (0.82)  | 2.20 |
| 11-10 Area 2 | Gp4 | g.chr7:18977443A>T         | Intron            | HDAC9   |            | histone deacetylase 9     | 46 (0.00)   | 18 (0.61)  | 1.63 |
| 11-10 Area 2 | Gp4 | g.chr14:31828227_31828227  | Frame Shift Del   | HEATR5A | p.D703fs   | HEAT repeat containing    | 178 (0.00)  | 99 (0.97)  | 2.59 |
| 11-10 Area 2 | Gp4 | g.chr15:64021785_64021785  | In Frame Del      | HERC1   | p.977_978S | HECT and RLD domain       | 114 (0.00)  | 112 (0.96) | 2.57 |
| 11-10 Area 2 | Gp4 | g.chr16:56976089_56976089  | Frame Shift Del   | HERPUD1 | p.F318fs   | homocysteine-inducible    | 184 (0.00)  | 181 (0.99) | 2.65 |
| 11-10 Area 2 | Gp4 | g.chr7:75186024G>A         | Missense Mutation | HIP1    | p.T558I    | huntingtin interacting pr | 40 (0.00)   | 35 (0.91)  | 2.44 |
| 11-10 Area 2 | Gp4 | g.chr6:52880935C>T         | Silent            | ICK     | p.Q259Q    | intestinal cell (MAK-lik  | 46 (0.00)   | 10 (0.90)  | 2.40 |
| 11-10 Area 2 | Gp4 | g.chr3:129195634_129195634 | Frame Shift Del   | IFT122  | p.E380fs   | intraflagellar transport  | 1 23 (0.00) | 21 (0.71)  | 1.90 |
| 11-10 Area 2 | Gp4 | g.chr12:110572798G>A       | Missense Mutation | IFT81   | p.V189I    | intraflagellar transport  | 8 34 (0.00) | 7 (0.71)   | 1.90 |
| 11-10 Area 2 | Gp4 | g.chr11:18738275G>A        | Splice Site       | IGSF22  | p.R416C    | immunoglobulin superfe    | 39 (0.03)   | 26 (0.27)  | 0.72 |

|              |     |                               |                   |           |           |                           |            |            |      |
|--------------|-----|-------------------------------|-------------------|-----------|-----------|---------------------------|------------|------------|------|
| 11-10 Area 2 | Gp4 | g.chr11:18738287G>A           | Missense Mutation | IGSF22    | p.L412F   | immunoglobulin superfa    | 39 (0.00)  | 25 (0.24)  | 0.64 |
| 11-10 Area 2 | Gp4 | g.chr3:159819613G>A           | RNA               | IL12A-AS1 |           | IL12A antisense RNA       | 116 (0.00) | 13 (0.92)  | 2.46 |
| 11-10 Area 2 | Gp4 | g.chr2:113742503C>A           | Silent            | IL36G     | p.T129T   | interleukin 36, gamma     | 31 (0.00)  | 68 (0.22)  | 0.59 |
| 11-10 Area 2 | Gp4 | g.chr4:143098074_143098074G>A | Intron            | INPP4B    |           | inositol polyphosphate-4  | 21 (0.00)  | 49 (0.37)  | 0.98 |
| 11-10 Area 2 | Gp4 | g.chr4:143273253T>A           | Intron            | INPP4B    |           | inositol polyphosphate-4  | 238 (0.00) | 113 (0.97) | 2.60 |
| 11-10 Area 2 | Gp4 | g.chr4:143273266T>A           | Intron            | INPP4B    |           | inositol polyphosphate-4  | 294 (0.00) | 114 (0.93) | 2.48 |
| 11-10 Area 2 | Gp4 | g.chr4:143290154G>T           | Intron            | INPP4B    |           | inositol polyphosphate-4  | 46 (0.00)  | 50 (0.30)  | 0.80 |
| 11-10 Area 2 | Gp4 | g.chr4:143365045G>A           | Intron            | INPP4B    |           | inositol polyphosphate-4  | 39 (0.00)  | 23 (0.57)  | 1.51 |
| 11-10 Area 2 | Gp4 | g.chr4:143508037G>A           | Intron            | INPP4B    |           | inositol polyphosphate-4  | 44 (0.00)  | 18 (0.83)  | 2.22 |
| 11-10 Area 2 | Gp4 | g.chr4:143561345C>T           | Intron            | INPP4B    |           | inositol polyphosphate-4  | 25 (0.00)  | 79 (0.68)  | 1.82 |
| 11-10 Area 2 | Gp4 | g.chr4:143561350C>T           | Intron            | INPP4B    |           | inositol polyphosphate-4  | 25 (0.00)  | 71 (0.69)  | 1.84 |
| 11-10 Area 2 | Gp4 | g.chr4:143680814G>T           | Intron            | INPP4B    |           | inositol polyphosphate-4  | 34 (0.03)  | 120 (0.45) | 1.20 |
| 11-10 Area 2 | Gp4 | g.chr21:35144573G>A           | Silent            | ITSN1     | p.R417R   | intersectin 1 (SH3 doma   | 15 (0.00)  | 10 (0.70)  | 1.87 |
| 11-10 Area 2 | Gp4 | g.chr10:24834907C>T           | Missense Mutation | KIAA1217  | p.P1829L  | KIAA1217                  | 77 (0.00)  | 54 (0.98)  | 2.62 |
| 11-10 Area 2 | Gp4 | g.chr2:8952601C>T             | Nonsense Mutation | KIDINS220 | p.W143*   | kinase D-interacting sub  | 34 (0.00)  | 11 (0.91)  | 2.42 |
| 11-10 Area 2 | Gp4 | g.chr11:28110248G>A           | Silent            | KIF18A    | p.D240D   | kinesin family member     | 52 (0.00)  | 21 (0.76)  | 2.03 |
| 11-10 Area 2 | Gp4 | g.chr20:30898784G>A           | Missense Mutation | KIF3B     | p.E402K   | kinesin family member     | 23 (0.00)  | 108 (0.38) | 1.01 |
| 11-10 Area 2 | Gp4 | g.chr4:38691473T>A            | Missense Mutation | KLF3      | p.V223E   | Kruppel-like factor 3 (b  | 118 (0.00) | 13 (0.77)  | 2.05 |
| 11-10 Area 2 | Gp4 | g.chr11:118373290C>A          | Missense Mutation | KMT2A     | p.S2228Y  | lysine (K)-specific meth  | 49 (0.00)  | 43 (0.33)  | 0.87 |
| 11-10 Area 2 | Gp4 | g.chr7:151849829G>T           | Missense Mutation | KMT2C     | p.L4163M  | lysine (K)-specific meth  | 82 (0.00)  | 21 (0.62)  | 1.65 |
| 11-10 Area 2 | Gp4 | g.chr6:117053447_117053447G>A | Frame Shift Del   | KPNA5     | p.FQ527fs | karyopherin alpha 5 (im   | 79 (0.00)  | 66 (0.98)  | 2.63 |
| 11-10 Area 2 | Gp4 | g.chr12:52826868_52826868G>A  | In Frame Del      | KRT75     | p.E222del | keratin 75                | 16 (0.00)  | 53 (0.40)  | 1.06 |
| 11-10 Area 2 | Gp4 | g.chr18:6943316C>A            | Missense Mutation | LAMA1     | p.W2977L  | laminin, alpha 1          | 112 (0.01) | 154 (0.78) | 2.08 |
| 11-10 Area 2 | Gp4 | g.chr18:6943333C>A            | Silent            | LAMA1     | p.V2971V  | laminin, alpha 1          | 106 (0.00) | 146 (0.44) | 1.17 |
| 11-10 Area 2 | Gp4 | g.chr11:27390231G>A           | Missense Mutation | LGR4      | p.P680L   | leucine-rich repeat cont  | 61 (0.00)  | 16 (0.38)  | 1.00 |
| 11-10 Area 2 | Gp4 | g.chr3:197746201C>G           | Missense Mutation | LMLN      | p.A474G   | leishmanolysin-like (me   | 127 (0.00) | 82 (0.56)  | 1.50 |
| 11-10 Area 2 | Gp4 | g.chr6:160913995C>T           | RNA               | LPAL2     |           | lipoprotein, Lp(a)-like 2 | 119 (0.00) | 13 (0.92)  | 2.46 |
| 11-10 Area 2 | Gp4 | g.chr16:55562327C>T           | Missense Mutation | LPCAT2    | p.A117V   | lysophosphatidylcholine   | 146 (0.00) | 42 (0.31)  | 0.83 |
| 11-10 Area 2 | Gp4 | g.chr2:141283887C>T           | Missense Mutation | LRP1B     | p.A2599T  | low density lipoprotein   | 155 (0.02) | 21 (0.95)  | 2.54 |
| 11-10 Area 2 | Gp4 | g.chr1:90178987G>A            | Silent            | LRRC8C    | p.K286K   | leucine rich repeat conta | 77 (0.00)  | 71 (0.94)  | 2.52 |
| 11-10 Area 2 | Gp4 | g.chr2:74834292A>C            | Missense Mutation | M1AP      | p.L162W   | meiosis 1 associated pro  | 29 (0.00)  | 56 (0.29)  | 0.76 |
| 11-10 Area 2 | Gp4 | g.chrX:140993926C>G           | Missense Mutation | MAGEC1    | p.L246V   | melanoma antigen famil    | 76 (0.01)  | 21 (0.90)  | 1.51 |
| 11-10 Area 2 | Gp4 | g.chr7:77733015G>A            | Intron            | MAGI2     |           | membrane associated gu    | 72 (0.00)  | 203 (0.23) | 0.62 |
| 11-10 Area 2 | Gp4 | g.chr7:77875926G>A            | Intron            | MAGI2     |           | membrane associated gu    | 74 (0.00)  | 23 (0.57)  | 1.51 |
| 11-10 Area 2 | Gp4 | g.chr7:78024631G>T            | Intron            | MAGI2     |           | membrane associated gu    | 47 (0.00)  | 31 (0.16)  | 0.43 |

|              |     |                            |                   |          |           |                           |            |            |      |
|--------------|-----|----------------------------|-------------------|----------|-----------|---------------------------|------------|------------|------|
| 11-10 Area 2 | Gp4 | g.chr7:78120245_78120246   | Intron            | MAGI2    |           | membrane associated gu    | 124 (0.00) | 248 (0.37) | 0.98 |
| 11-10 Area 2 | Gp4 | g.chr7:78175999C>T         | Intron            | MAGI2    |           | membrane associated gu    | 116 (0.00) | 19 (0.95)  | 2.53 |
| 11-10 Area 2 | Gp4 | g.chr7:78322653A>T         | Intron            | MAGI2    |           | membrane associated gu    | 68 (0.00)  | 43 (0.98)  | 2.60 |
| 11-10 Area 2 | Gp4 | g.chr7:78332375G>A         | Intron            | MAGI2    |           | membrane associated gu    | 54 (0.00)  | 28 (0.29)  | 0.76 |
| 11-10 Area 2 | Gp4 | g.chr7:78371015C>A         | Intron            | MAGI2    |           | membrane associated gu    | 29 (0.00)  | 36 (0.58)  | 1.56 |
| 11-10 Area 2 | Gp4 | g.chr7:78371049G>A         | Intron            | MAGI2    |           | membrane associated gu    | 28 (0.00)  | 10 (0.80)  | 2.13 |
| 11-10 Area 2 | Gp4 | g.chr7:78394356G>A         | Intron            | MAGI2    |           | membrane associated gu    | 161 (0.01) | 41 (0.95)  | 2.54 |
| 11-10 Area 2 | Gp4 | g.chr7:78917941G>T         | Intron            | MAGI2    |           | membrane associated gu    | 39 (0.00)  | 114 (0.18) | 0.47 |
| 11-10 Area 2 | Gp4 | g.chr7:79043089C>T         | Intron            | MAGI2    |           | membrane associated gu    | 39 (0.00)  | 231 (0.20) | 0.54 |
| 11-10 Area 2 | Gp4 | g.chr9:139994191_139994191 | Frame Shift Del   | MAN1B1   | p.H259fs  | mannosidase, alpha, cla   | 38 (0.00)  | 23 (0.91)  | 2.43 |
| 11-10 Area 2 | Gp4 | g.chr5:71491107C>A         | Missense Mutation | MAP1B    | p.T642K   | microtubule-associated p  | 43 (0.00)  | 60 (0.97)  | 2.58 |
| 11-10 Area 2 | Gp4 | g.chr2:102452364C>T        | Missense Mutation | MAP4K4   | p.L233F   | mitogen-activated protei  | 50 (0.02)  | 62 (0.98)  | 2.62 |
| 11-10 Area 2 | Gp4 | g.chr12:57906707A>T        | Missense Mutation | MARS     | p.N643Y   | methionyl-tRNA synthe     | 102 (0.00) | 73 (0.41)  | 1.10 |
| 11-10 Area 2 | Gp4 | g.chr1:85487848G>A         | Silent            | MCOLN3   | p.L409L   | mucolipin 3               | 55 (0.00)  | 44 (0.39)  | 1.03 |
| 11-10 Area 2 | Gp4 | g.chr11:86219885G>T        | Missense Mutation | ME3      | p.D164E   | malic enzyme 3, NADP      | 47 (0.00)  | 19 (0.84)  | 2.25 |
| 11-10 Area 2 | Gp4 | g.chr3:168807858C>T        | Missense Mutation | MECOM    | p.E914K   | MDS1 and EVI1 compl       | 113 (0.00) | 13 (0.92)  | 2.46 |
| 11-10 Area 2 | Gp4 | g.chr15:100185820G>A       | Missense Mutation | MEF2A    | p.V37M    | myocyte enhancer facto    | 61 (0.00)  | 91 (0.44)  | 1.17 |
| 11-10 Area 2 | Gp4 | g.chr2:112702565G>A        | Missense Mutation | MERTK    | p.G171R   | MER proto-oncogene, ty    | 83 (0.01)  | 54 (0.91)  | 2.42 |
| 11-10 Area 2 | Gp4 | g.chr7:116397781G>A        | Silent            | MET      | p.G685G   | MET proto-oncogene, r     | 41 (0.00)  | 58 (0.26)  | 0.69 |
| 11-10 Area 2 | Gp4 | g.chr13:103343306T>C       | Missense Mutation | METTL21C | p.K47E    | methyltransferase like 2  | 21 (0.00)  | 58 (0.31)  | 0.83 |
| 11-10 Area 2 | Gp4 | g.chr4:128843045C>A        | Nonsense Mutation | MFSD8    | p.G358*   | major facilitator superfa | 19 (0.00)  | 39 (0.90)  | 2.39 |
| 11-10 Area 2 | Gp4 | g.chr12:56845079G>A        | Silent            | MIP      | p.N259N   | major intrinsic protein o | 94 (0.00)  | 11 (0.91)  | 2.42 |
| 11-10 Area 2 | Gp4 | g.chr6:168325706C>A        | Missense Mutation | MLLT4    | p.P1005T  | myeloid/lymphoid or mi    | 30 (0.00)  | 46 (0.46)  | 1.45 |
| 11-10 Area 2 | Gp4 | g.chr11:118107863G>C       | Missense Mutation | MPZL3    | p.P106R   | myelin protein zero-like  | 150 (0.00) | 88 (0.55)  | 1.45 |
| 11-10 Area 2 | Gp4 | g.chr11:94192640C>T        | Silent            | MRE11A   | p.L478L   | MRE11 meiotic recomb      | 127 (0.00) | 46 (0.26)  | 0.70 |
| 11-10 Area 2 | Gp4 | g.chr8:121426231G>A        | Splice Site       | MRPL13   | p.P172S   | mitochondrial ribosoma    | 49 (0.02)  | 126 (0.52) | 1.40 |
| 11-10 Area 2 | Gp4 | g.chr11:60183345C>T        | Nonsense Mutation | MS4A14   | p.Q335*   | membrane-spanning 4-d     | 65 (0.00)  | 195 (0.37) | 0.98 |
| 11-10 Area 2 | Gp4 | g.chr11:60183747C>T        | Nonsense Mutation | MS4A14   | p.Q469*   | membrane-spanning 4-d     | 42 (0.00)  | 104 (0.20) | 0.54 |
| 11-10 Area 2 | Gp4 | g.chr11:62362494G>A        | Missense Mutation | MTA2     | p.P338L   | metastasis associated 1   | 161 (0.00) | 17 (0.71)  | 1.88 |
| 11-10 Area 2 | Gp4 | g.chr7:100640008C>A        | Nonsense Mutation | MUC12    | p.S2198*  | mucin 12, cell surface a  | 421 (0.00) | 20 (0.90)  | 2.40 |
| 11-10 Area 2 | Gp4 | g.chr19:9046787C>A         | Missense Mutation | MUC16    | p.R11615M | mucin 16, cell surface a  | 83 (0.00)  | 62 (0.34)  | 0.90 |
| 11-10 Area 2 | Gp4 | g.chr7:100683893C>T        | Missense Mutation | MUC17    | p.L3066F  | mucin 17, cell surface a  | 74 (0.01)  | 75 (0.28)  | 0.75 |
| 11-10 Area 2 | Gp4 | g.chr11:1093028C>T         | Missense Mutation | MUC2     | p.T1616I  | mucin 2, oligomeric mu    | 17 (0.00)  | 17 (0.53)  | 1.41 |
| 11-10 Area 2 | Gp4 | g.chr11:1016931G>A         | Missense Mutation | MUC6     | p.A1957V  | mucin 6, oligomeric mu    | 452 (0.00) | 32 (0.16)  | 0.42 |
| 11-10 Area 2 | Gp4 | g.chr11:1017596T>G         | Missense Mutation | MUC6     | p.Q1735H  | mucin 6, oligomeric mu    | 244 (0.00) | 331 (0.27) | 0.71 |

|              |     |                             |                   |          |           |                           |             |            |      |
|--------------|-----|-----------------------------|-------------------|----------|-----------|---------------------------|-------------|------------|------|
| 11-10 Area 2 | Gp4 | g.chr17:48606115G>T         | Nonsense Mutation | MYCBPAP  | p.E866*   | MYCBP associated prot     | 21 (0.00)   | 42 (0.14)  | 0.38 |
| 11-10 Area 2 | Gp4 | g.chr6:76599938_76599954    | Frame Shift Del   | MYO6     | p.EDEKRR  | myosin VI                 | 89 (0.00)   | 156 (0.68) | 1.81 |
| 11-10 Area 2 | Gp4 | g.chr10:69934036C>T         | Silent            | MYPN     | p.S729S   | myopalladin               | 54 (0.02)   | 29 (0.93)  | 2.48 |
| 11-10 Area 2 | Gp4 | g.chr1:148754951G>A         | Missense Mutation | NBPF16   | p.G536E   |                           | 178 (0.00)  | 134 (0.98) | 2.61 |
| 11-10 Area 2 | Gp4 | g.chr10:51584746C>A         | Missense Mutation | NCOA4    | p.S282Y   | nuclear receptor coactiv  | 119 (0.00)  | 12 (0.50)  | 1.33 |
| 11-10 Area 2 | Gp4 | g.chr4:121958011T>G         | Missense Mutation | NDNF     | p.Q372P   | neuron-derived neurotro   | 135 (0.00)  | 17 (0.29)  | 0.78 |
| 11-10 Area 2 | Gp4 | g.chr14:35871264C>T         | Silent            | NFKBIA   | p.L260L   | nuclear factor of kappa l | 278 (0.00)  | 144 (0.30) | 0.80 |
| 11-10 Area 2 | Gp4 | g.chr11:129739582_129739582 | Frame Shift Del   | NFRKB    | p.Q1113fs | nuclear factor related to | 85 (0.00)   | 52 (0.94)  | 2.51 |
| 11-10 Area 2 | Gp4 | g.chr9:33318757T>C          | Silent            | NFX1     | p.D539D   | nuclear transcription fac | 127 (0.00)  | 129 (0.24) | 0.64 |
| 11-10 Area 2 | Gp4 | g.chr15:23006615C>A         | Missense Mutation | NIPA2    | p.S230I   | non imprinted in Prader-  | 73 (0.00)   | 29 (0.52)  | 1.38 |
| 11-10 Area 2 | Gp4 | g.chr15:23006641C>A         | Silent            | NIPA2    | p.L221L   | non imprinted in Prader-  | 78 (0.00)   | 27 (0.48)  | 1.28 |
| 11-10 Area 2 | Gp4 | g.chr17:26370174C>A         | Missense Mutation | NLK      | p.P92Q    | nemo-like kinase          | 22 (0.00)   | 34 (0.71)  | 1.88 |
| 11-10 Area 2 | Gp4 | g.chr19:54318211C>G         | Silent            | NLRP12   | p.G107G   | NLR family, pyrin dom     | 74 (0.00)   | 21 (0.81)  | 2.16 |
| 11-10 Area 2 | Gp4 | g.chr18:11619810T>A         | RNA               | NPIP1P   |           | nuclear pore complex in   | 72 (0.00)   | 34 (0.26)  | 0.71 |
| 11-10 Area 2 | Gp4 | g.chr14:90782932C>A         | Nonsense Mutation | NRDE2    | p.E133*   | NRDE-2, necessary for     | 54 (0.00)   | 79 (0.18)  | 0.47 |
| 11-10 Area 2 | Gp4 | g.chr1:46810789G>A          | Missense Mutation | NSUN4    | p.G137E   | NOP2/Sun domain fami      | 19 (0.00)   | 33 (0.73)  | 1.94 |
| 11-10 Area 2 | Gp4 | g.chr14:20404296G>T         | Silent            | OR4K1    | p.V157V   | olfactory receptor, famil | 175 (0.01)  | 18 (0.39)  | 0.84 |
| 11-10 Area 2 | Gp4 | g.chr11:4968216_4968217     | Frame Shift Del   | OR51A4   | p.I39fs   | olfactory receptor, famil | 118 (0.00)  | 80 (0.96)  | 2.57 |
| 11-10 Area 2 | Gp4 | g.chr11:55563602G>A         | Missense Mutation | OR5D14   | p.G191S   | olfactory receptor, famil | 236 (0.00)  | 86 (0.99)  | 2.64 |
| 11-10 Area 2 | Gp4 | g.chr11:55563738G>A         | Missense Mutation | OR5D14   | p.R236H   | olfactory receptor, famil | 58 (0.00)   | 14 (0.93)  | 2.48 |
| 11-10 Area 2 | Gp4 | g.chr2:242066295G>T         | Missense Mutation | PASK     | p.H679N   | PAS domain containing     | 36 (0.00)   | 44 (0.23)  | 0.61 |
| 11-10 Area 2 | Gp4 | g.chr5:140262224G>T         | Missense Mutation | PCDHA13  | p.R124M   | protocadherin alpha 13    | 103 (0.00)  | 61 (0.64)  | 1.70 |
| 11-10 Area 2 | Gp4 | g.chr5:140750423G>A         | Silent            | PCDHGB3  | p.L154L   | protocadherin gamma su    | 191 (0.00)  | 32 (0.16)  | 0.42 |
| 11-10 Area 2 | Gp4 | g.chr17:36895507C>T         | Splice Site       | PCGF2    |           | polycomb group ring fin   | 33 (0.00)   | 18 (0.89)  | 2.37 |
| 11-10 Area 2 | Gp4 | g.chr8:17824535C>A          | Missense Mutation | PCM1     | p.P1090T  | pericentriolar material   | 1102 (0.00) | 270 (0.24) | 0.63 |
| 11-10 Area 2 | Gp4 | g.chr11:65384400C>A         | Missense Mutation | PCNXL3   | p.Q87K    | pecanex-like 3 (Drosopl   | 35 (0.00)   | 42 (0.52)  | 1.40 |
| 11-10 Area 2 | Gp4 | g.chr1:144915473G>T         | Missense Mutation | PDE4DIP  | p.S788Y   | phosphodiesterase 4D ir   | 55 (0.02)   | 18 (0.61)  | 1.63 |
| 11-10 Area 2 | Gp4 | g.chr18:60529883G>T         | Intron            | PHLPP1   |           | PH domain and leucine     | 66 (0.00)   | 19 (0.47)  | 1.26 |
| 11-10 Area 2 | Gp4 | g.chr18:60534076C>T         | Intron            | PHLPP1   |           | PH domain and leucine     | 74 (0.01)   | 90 (0.98)  | 2.61 |
| 11-10 Area 2 | Gp4 | g.chr16:71748537G>A         | Silent            | PHLPP2   | p.S54S    | PH domain and leucine     | 22 (0.00)   | 48 (0.31)  | 0.83 |
| 11-10 Area 2 | Gp4 | g.chr12:18854480T>C         | Silent            | PLCZ1    | p.T106T   | phospholipase C, zeta 1   | 21 (0.00)   | 140 (0.31) | 0.67 |
| 11-10 Area 2 | Gp4 | g.chr12:18854481G>A         | Missense Mutation | PLCZ1    | p.T106I   | phospholipase C, zeta 1   | 21 (0.00)   | 148 (0.34) | 0.72 |
| 11-10 Area 2 | Gp4 | g.chr17:62818041G>A         | RNA               | PLEKHM1P |           | pleckstrin homology do    | 71 (0.00)   | 20 (0.95)  | 2.53 |
| 11-10 Area 2 | Gp4 | g.chr3:126722214G>T         | Silent            | PLXNA1   | p.L473L   | plexin A1                 | 19 (0.00)   | 27 (0.44)  | 1.19 |
| 11-10 Area 2 | Gp4 | g.chr14:39648399T>A         | Silent            | PNN      | p.A201A   | pinin, desmosome assoc    | 96 (0.01)   | 108 (0.96) | 2.57 |

|              |     |                            |                   |               |          |                                                            |            |      |
|--------------|-----|----------------------------|-------------------|---------------|----------|------------------------------------------------------------|------------|------|
| 11-10 Area 2 | Gp4 | g.chr22:38355445_38355446  | Frame Shift Del   | POLR2F        | p.R62fs  | polymerase (RNA) II (E 60 (0.00)                           | 63 (0.97)  | 2.58 |
| 11-10 Area 2 | Gp4 | g.chr12:106838313C>A       | Missense Mutation | POLR3B        | p.H676Q  | polymerase (RNA) III (162 (0.00)                           | 66 (0.89)  | 2.38 |
| 11-10 Area 2 | Gp4 | g.chr7:124532340G>T        | Missense Mutation | POT1          | p.P35Q   | protection of telomeres 219 (0.00)                         | 118 (0.36) | 0.95 |
| 11-10 Area 2 | Gp4 | g.chr1:203024669G>T        | Missense Mutation | PPFIA4        | p.G626C  | protein tyrosine phosphatase 22 (0.00)                     | 22 (0.82)  | 2.18 |
| 11-10 Area 2 | Gp4 | g.chr2:170492639G>A        | Missense Mutation | PPIG          | p.R352H  | peptidylprolyl isomerase 27 (0.00)                         | 28 (0.36)  | 0.95 |
| 11-10 Area 2 | Gp4 | g.chr6:42974999_42975000   | Frame Shift Del   | PPP2R5D       | p.E198fs | protein phosphatase 2, regulatory subunit 239 (0.00)       | 27 (0.85)  | 2.27 |
| 11-10 Area 2 | Gp4 | g.chr10:103899871A>G       | Missense Mutation | PPRC1         | p.S536G  | peroxisome proliferator-activated receptor gamma 37 (0.00) | 30 (0.97)  | 2.58 |
| 11-10 Area 2 | Gp4 | g.chr6:106553724C>T        | Silent            | PRDM1         | p.P527P  | PR domain containing 161 (0.00)                            | 45 (0.24)  | 0.65 |
| 11-10 Area 2 | Gp4 | g.chr11:45246018C>T        | Silent            | PRDM11        | p.I331I  | PR domain containing 140 (0.00)                            | 27 (0.89)  | 2.37 |
| 11-10 Area 2 | Gp4 | g.chr1:3160691G>C          | Missense Mutation | PRDM16        | p.C143S  | PR domain containing 166 (0.00)                            | 43 (0.79)  | 2.11 |
| 11-10 Area 2 | Gp4 | g.chr1:186277676_186277677 | Frame Shift Del   | PRG4          | p.ATTTEK | proteoglycan 4 313 (0.00)                                  | 129 (0.51) | 1.36 |
| 11-10 Area 2 | Gp4 | g.chr1:186277712C>G        | Missense Mutation | PRG4          | p.T954R  | proteoglycan 4 245 (0.00)                                  | 62 (0.81)  | 2.15 |
| 11-10 Area 2 | Gp4 | g.chr3:64145614A>G         | Splice Site       | PRICKLE2      |          | prickle homolog 2 (Drosophila) 100 (0.00)                  | 22 (0.36)  | 0.97 |
| 11-10 Area 2 | Gp4 | g.chr5:35068963T>C         | Missense Mutation | PRLR          | p.T235A  | prolactin receptor 141 (0.00)                              | 48 (0.44)  | 1.17 |
| 11-10 Area 2 | Gp4 | g.chr12:50030598G>A        | Missense Mutation | PRPF40B       | p.R509Q  | PRP40 pre-mRNA processing factor 36 (0.00)                 | 11 (0.91)  | 2.42 |
| 11-10 Area 2 | Gp4 | g.chr12:50036134G>T        | Missense Mutation | PRPF40B       | p.E667D  | PRP40 pre-mRNA processing factor 17 (0.00)                 | 37 (0.70)  | 1.87 |
| 11-10 Area 2 | Gp4 | g.chr19:43382120T>C        | Missense Mutation | PSG1          | p.I125M  | pregnancy specific beta-1-glycoprotein 73 (0.01)           | 99 (0.22)  | 0.59 |
| 11-10 Area 2 | Gp4 | g.chr5:40681513C>G         | Missense Mutation | PTGER4        | p.L140V  | prostaglandin E receptor 4 155 (0.01)                      | 155 (0.66) | 1.77 |
| 11-10 Area 2 | Gp4 | g.chr15:55841189_55841190  | Frame Shift Del   | PYGO1         | p.G18fs  | pygopus family PHD finger 17 (0.00)                        | 38 (0.53)  | 1.40 |
| 11-10 Area 2 | Gp4 | g.chr17:29857383G>A        | Missense Mutation | RAB11FIP4     | p.G565R  | RAB11 family interacting protein 34 (0.00)                 | 103 (0.19) | 0.52 |
| 11-10 Area 2 | Gp4 | g.chr9:125865442C>A        | Missense Mutation | RABGAP1       | p.L1054M | RAB GTPase activating protein 49 (0.00)                    | 53 (0.25)  | 0.65 |
| 11-10 Area 2 | Gp4 | g.chr12:65082160G>T        | Silent            | RASSF3        | p.L128L  | Ras association domain protein 76 (0.00)                   | 14 (0.71)  | 1.90 |
| 11-10 Area 2 | Gp4 | g.chr13:48909767G>T        | Intron            | RB1           |          | retinoblastoma 1 16 (0.00)                                 | 62 (0.23)  | 0.60 |
| 11-10 Area 2 | Gp4 | g.chr11:66411480C>A        | Silent            | RBM14-RBM4    | p.G299G  | RBM14-RBM4 readthrough 75 (0.00)                           | 82 (0.27)  | 0.72 |
| 11-10 Area 2 | Gp4 | g.chr8:30361848T>A         | Missense Mutation | RBPMS         | p.F98I   | RNA binding protein with zinc finger 30 (0.03)             | 31 (0.48)  | 1.29 |
| 11-10 Area 2 | Gp4 | g.chr4:57777211C>T         | Missense Mutation | REST          | p.S136L  | RE1-silencing transcription factor 35 (0.00)               | 32 (0.88)  | 2.33 |
| 11-10 Area 2 | Gp4 | g.chr2:85577329C>T         | Silent            | RETSAT        | p.L211L  | retinol saturase (all-trans) 16 (0.00)                     | 131 (0.27) | 0.71 |
| 11-10 Area 2 | Gp4 | g.chr8:125498685C>A        | Silent            | RNF139        | p.S265S  | ring finger protein 139 34 (0.00)                          | 23 (0.65)  | 1.74 |
| 11-10 Area 2 | Gp4 | g.chr9:104314037C>A        | Silent            | RNF20         | p.V448V  | ring finger protein 20, E79 79 (0.00)                      | 84 (0.29)  | 0.76 |
| 11-10 Area 2 | Gp4 | g.chr6:89614649C>A         | Missense Mutation | RNGTT         | p.A157S  | RNA guanylyltransferase 40 (0.03)                          | 94 (0.83)  | 2.21 |
| 11-10 Area 2 | Gp4 | g.chr10:90341966G>T        | Missense Mutation | RNLS          | p.H73N   | renalase, FAD-dependent 25 (0.00)                          | 14 (0.50)  | 0.69 |
| 11-10 Area 2 | Gp4 | g.chr9:109099488C>A        | lincRNA           | RP11-308N19.1 |          | 27 (0.00)                                                  | 14 (0.50)  | 1.33 |
| 11-10 Area 2 | Gp4 | g.chr9:6669135G>A          | lincRNA           | RP11-390F4.6  |          | 103 (0.00)                                                 | 105 (0.87) | 2.31 |
| 11-10 Area 2 | Gp4 | g.chr14:24621073G>A        | Missense Mutation | RP11-468E2.4  | p.E143K  | 16 (0.00)                                                  | 20 (0.75)  | 2.00 |
| 11-10 Area 2 | Gp4 | g.chr18:48104T>C           | Silent            | RP11-683L23   | p.L173L  | 411 (0.00)                                                 | 44 (0.98)  | 2.61 |

|              |     |                              |                   |         |          |                                        |            |      |
|--------------|-----|------------------------------|-------------------|---------|----------|----------------------------------------|------------|------|
| 11-10 Area 2 | Gp4 | g.chr1:213415003C>A          | Silent            | RPS6KC1 | p.A716A  | ribosomal protein S6 kir 24 (0.00)     | 14 (0.57)  | 1.52 |
| 11-10 Area 2 | Gp4 | g.chr19:46307834G>A          | Silent            | RSPH6A  | p.H443H  | radial spoke head 6 hom 37 (0.00)      | 145 (0.47) | 1.25 |
| 11-10 Area 2 | Gp4 | g.chr1:84765316T>C           | Missense Mutation | SAMD13  | p.L6S    | sterile alpha motif doma 117 (0.00)    | 76 (0.55)  | 1.47 |
| 11-10 Area 2 | Gp4 | g.chr12:46319990C>T          | Missense Mutation | SCAF11  | p.R1165Q | SR-related CTD-associa 103 (0.01)      | 72 (0.99)  | 2.63 |
| 11-10 Area 2 | Gp4 | g.chr20:18541334C>A          | Missense Mutation | SEC23B  | p.Q752K  | Sec23 homolog B (S. ce 103 (0.01)      | 110 (0.45) | 1.21 |
| 11-10 Area 2 | Gp4 | g.chr10:102269147C>T         | Missense Mutation | SEC31B  | p.G109R  | SEC31 homolog B (S. c 134 (0.00)       | 50 (0.28)  | 0.75 |
| 11-10 Area 2 | Gp4 | g.chr5:9202274C>T            | Missense Mutation | SEMA5A  | p.C242Y  | sema domain, seven thr 48 (0.00)       | 56 (0.30)  | 0.81 |
| 11-10 Area 2 | Gp4 | g.chr2:179997128C>T          | Missense Mutation | SESTD1  | p.G292E  | SEC14 and spectrin don 53 (0.00)       | 59 (0.83)  | 2.21 |
| 11-10 Area 2 | Gp4 | g.chr18:42531407G>A          | Missense Mutation | SETBP1  | p.G701E  | SET binding protein 1 33 (0.00)        | 104 (0.99) | 2.64 |
| 11-10 Area 2 | Gp4 | g.chr18:42532104C>A          | Silent            | SETBP1  | p.L933L  | SET binding protein 1 67 (0.00)        | 16 (0.94)  | 2.50 |
| 11-10 Area 2 | Gp4 | g.chr1:35654957G>T           | Missense Mutation | SFPQ    | p.A481D  | splicing factor proline/g 17 (0.00)    | 19 (0.95)  | 2.53 |
| 11-10 Area 2 | Gp4 | g.chr4:152096257A>T          | Missense Mutation | SH3D19  | p.Y87N   | SH3 domain containing 45 (0.00)        | 17 (0.94)  | 2.51 |
| 11-10 Area 2 | Gp4 | g.chr3:72833413C>A           | Intron            | SHQ1    |          | SHQ1, H/ACA ribonucl 41 (0.00)         | 14 (0.86)  | 2.29 |
| 11-10 Area 2 | Gp4 | g.chr4:72425819C>A           | Missense Mutation | SLC4A4  | p.L983I  | solute carrier family 4 (ε 36 (0.00)   | 129 (0.28) | 0.74 |
| 11-10 Area 2 | Gp4 | g.chr11:26700282C>A          | Missense Mutation | SLC5A12 | p.G519V  | solute carrier family 5 (ε 76 (0.00)   | 35 (0.37)  | 0.99 |
| 11-10 Area 2 | Gp4 | g.chr19:49812955_49812955del | Frame Shift Del   | SLC6A16 | p.C277fs | solute carrier family 6, r 73 (0.00)   | 41 (0.90)  | 2.41 |
| 11-10 Area 2 | Gp4 | g.chr1:27432470G>A           | Missense Mutation | SLC9A1  | p.S464F  | solute carrier family 9, s 18 (0.00)   | 169 (0.55) | 1.47 |
| 11-10 Area 2 | Gp4 | g.chr16:67291323G>A          | Missense Mutation | SLC9A5  | p.E471K  | solute carrier family 9, s 95 (0.00)   | 155 (0.50) | 1.34 |
| 11-10 Area 2 | Gp4 | g.chr5:159840466A>T          | Missense Mutation | SLU7    | p.D189E  | SLU7 splicing factor ho 183 (0.00)     | 17 (0.76)  | 2.04 |
| 11-10 Area 2 | Gp4 | g.chr18:48560605C>T          | Intron            | SMAD4   |          | SMAD family member 456 (0.02)          | 69 (0.17)  | 0.46 |
| 11-10 Area 2 | Gp4 | g.chr18:48560608T>C          | Intron            | SMAD4   |          | SMAD family member 453 (0.00)          | 77 (0.16)  | 0.42 |
| 11-10 Area 2 | Gp4 | g.chr18:48560611C>T          | Intron            | SMAD4   |          | SMAD family member 451 (0.00)          | 67 (0.16)  | 0.44 |
| 11-10 Area 2 | Gp4 | g.chr3:47702832C>A           | Nonsense Mutation | SMARCC1 | p.E758*  | SWI/SNF related, matri: 35 (0.00)      | 20 (0.50)  | 1.33 |
| 11-10 Area 2 | Gp4 | g.chr10:112352919G>T         | Missense Mutation | SMC3    | p.R634L  | structural maintenance c 39 (0.00)     | 34 (0.94)  | 2.51 |
| 11-10 Area 2 | Gp4 | g.chr7:21469455G>C           | Silent            | SP4     | p.L224L  | Sp4 transcription factor 94 (0.00)     | 85 (0.16)  | 0.44 |
| 11-10 Area 2 | Gp4 | g.chr1:118584573C>T          | Silent            | SPAG17  | p.K969K  | sperm associated antigen 177 (0.00)    | 275 (0.22) | 0.59 |
| 11-10 Area 2 | Gp4 | g.chr17:47701118A>T          | Intron            | SPOP    |          | speckle-type POZ protei 42 (0.00)      | 209 (0.53) | 1.42 |
| 11-10 Area 2 | Gp4 | g.chr17:47736697A>T          | Intron            | SPOP    |          | speckle-type POZ protei 122 (0.00)     | 135 (0.99) | 2.65 |
| 11-10 Area 2 | Gp4 | g.chr12:53468528T>C          | Missense Mutation | SPRYD3  | p.K175E  | SPRY domain containin 66 (0.00)        | 28 (0.61)  | 1.62 |
| 11-10 Area 2 | Gp4 | g.chr1:158639272G>A          | Silent            | SPTA1   | p.L587L  | spectrin, alpha, erythrocyte 28 (0.00) | 68 (0.96)  | 2.55 |
| 11-10 Area 2 | Gp4 | g.chr1:85117674C>T           | Missense Mutation | SSX2IP  | p.A466T  | synovial sarcoma, X bre 200 (0.00)     | 33 (0.94)  | 2.51 |
| 11-10 Area 2 | Gp4 | g.chr15:42980654C>A          | Missense Mutation | STARD9  | p.T2293N | StAR-related lipid trans: 59 (0.00)    | 99 (0.51)  | 1.35 |
| 11-10 Area 2 | Gp4 | g.chr17:40469220G>A          | Silent            | STAT3   | p.T708T  | signal transducer and ac 44 (0.00)     | 11 (0.91)  | 2.42 |
| 11-10 Area 2 | Gp4 | g.chr1:172525096G>A          | Missense Mutation | SUCO    | p.D126N  | SUN domain containing 21 (0.00)        | 39 (0.46)  | 1.23 |
| 11-10 Area 2 | Gp4 | g.chr9:136227975G>T          | Missense Mutation | SURF2   | p.R244L  | surfeit 2 17 (0.00)                    | 28 (0.96)  | 2.57 |

|              |     |                             |                   |          |          |                           |            |            |      |
|--------------|-----|-----------------------------|-------------------|----------|----------|---------------------------|------------|------------|------|
| 11-10 Area 2 | Gp4 | g.chr14:64593328G>A         | Missense Mutation | SYNE2    | p.E4525K | spectrin repeat containir | 87 (0.00)  | 35 (0.97)  | 2.59 |
| 11-10 Area 2 | Gp4 | g.chr10:8007691C>A          | Missense Mutation | TAF3     | p.H740N  | TAF3 RNA polymerase 16    | (0.00)     | 162 (0.17) | 0.46 |
| 11-10 Area 2 | Gp4 | g.chr10:105139529G>A        | Splice Site       | TAF5     |          | TAF5 RNA polymerase 31    | (0.00)     | 27 (0.96)  | 2.57 |
| 11-10 Area 2 | Gp4 | g.chr7:139636004G>A         | Silent            | TBXAS1   | p.E116E  | thromboxane A synthase    | 20 (0.00)  | 32 (0.22)  | 0.58 |
| 11-10 Area 2 | Gp4 | g.chr1:152082370C>T         | Missense Mutation | TCHH     | p.R1108K | trichohyalin              | 54 (0.00)  | 87 (0.17)  | 0.46 |
| 11-10 Area 2 | Gp4 | g.chr4:106194060G>T         | Missense Mutation | TET2     | p.A1508S | tet methylcytosine dioxy  | 84 (0.00)  | 36 (0.64)  | 1.70 |
| 11-10 Area 2 | Gp4 | g.chr15:43569074C>T         | Silent            | TGM7     | p.G653G  | transglutaminase 7        | 17 (0.00)  | 20 (0.40)  | 1.07 |
| 11-10 Area 2 | Gp4 | g.chr14:77709261C>T         | Silent            | TMEM63C  | p.V401V  | transmembrane protein (   | 137 (0.00) | 13 (0.62)  | 1.64 |
| 11-10 Area 2 | Gp4 | g.chr8:125332413C>A         | Missense Mutation | TMEM65   | p.A179S  | transmembrane protein (   | 76 (0.00)  | 147 (0.48) | 1.29 |
| 11-10 Area 2 | Gp4 | g.chr16:24828246G>C         | Silent            | TNRC6A   | p.R1647R | trinucleotide repeat cont | 170 (0.00) | 146 (0.32) | 1.04 |
| 11-10 Area 2 | Gp4 | g.chr1:186304252G>C         | Missense Mutation | TPR      | p.Q1641E | translocated promoter re  | 40 (0.00)  | 20 (0.40)  | 1.07 |
| 11-10 Area 2 | Gp4 | g.chr21:10906991G>T         | Silent            | TPTE     | p.R524R  | transmembrane phospho     | 47 (0.00)  | 27 (0.19)  | 0.49 |
| 11-10 Area 2 | Gp4 | g.chr5:911998G>A            | Missense Mutation | TRIP13   | p.E303K  | thyroid hormone recept    | 40 (0.00)  | 64 (0.31)  | 0.83 |
| 11-10 Area 2 | Gp4 | g.chr19:31770009C>T         | Silent            | TSHZ3    | p.T230T  | teashirt zinc finger hom  | 129 (0.00) | 40 (0.80)  | 2.13 |
| 11-10 Area 2 | Gp4 | g.chr7:19739858G>A          | Missense Mutation | TWISTNB  | p.H148Y  | TWIST neighbor            | 55 (0.00)  | 67 (0.99)  | 2.63 |
| 11-10 Area 2 | Gp4 | g.chr16:11829917C>A         | Missense Mutation | TXNDC11  | p.A143S  | thioredoxin domain con    | 91 (0.00)  | 34 (0.88)  | 2.35 |
| 11-10 Area 2 | Gp4 | g.chr7:138968165G>T         | Silent            | UBN2     | p.G838G  | ubiquitin 2               | 45 (0.00)  | 43 (0.47)  | 1.24 |
| 11-10 Area 2 | Gp4 | g.chr13:115057209_115057209 | Frame Shift Del   | UPF3A    | p.C263fs | UPF3 regulator of nons    | 15 (0.00)  | 106 (0.32) | 0.86 |
| 11-10 Area 2 | Gp4 | g.chr2:61528547T>C          | Missense Mutation | USP34    | p.E1287G | ubiquitin specific peptid | 68 (0.00)  | 35 (0.43)  | 1.14 |
| 11-10 Area 2 | Gp4 | g.chr2:61571009G>T          | Missense Mutation | USP34    | p.S814Y  | ubiquitin specific peptid | 54 (0.00)  | 36 (0.33)  | 0.89 |
| 11-10 Area 2 | Gp4 | g.chr11:75852429G>T         | Missense Mutation | UVRAG    | p.R319L  | UV radiation resistance   | 96 (0.00)  | 26 (0.35)  | 0.92 |
| 11-10 Area 2 | Gp4 | g.chr2:37035871_37035871    | Frame Shift Del   | VIT      | p.I486fs | vitrin                    | 40 (0.00)  | 45 (0.93)  | 2.49 |
| 11-10 Area 2 | Gp4 | g.chr8:100733232A>T         | Missense Mutation | VPS13B   | p.E2361V | vacuolar protein sorting  | 44 (0.02)  | 151 (0.72) | 1.91 |
| 11-10 Area 2 | Gp4 | g.chr17:531457G>T           | Silent            | VPS53    | p.P234P  | vacuolar protein sorting  | 38 (0.00)  | 9 (0.89)   | 2.37 |
| 11-10 Area 2 | Gp4 | g.chr18:60243802C>T         | Missense Mutation | ZCCHC2   | p.S1176F | zinc finger, CCHC dom     | 136 (0.00) | 176 (0.33) | 0.88 |
| 11-10 Area 2 | Gp4 | g.chr2:207171587G>T         | Nonsense Mutation | ZDBF2    | p.E779*  | zinc finger, DBF-type c   | 175 (0.00) | 32 (0.59)  | 1.58 |
| 11-10 Area 2 | Gp4 | g.chr16:25258351G>T         | Missense Mutation | ZKSCAN2  | p.T389N  | zinc finger with KRAB     | 68 (0.00)  | 195 (0.48) | 1.58 |
| 11-10 Area 2 | Gp4 | g.chr3:44612108G>A          | Silent            | ZKSCAN7  | p.E502E  | zinc finger with KRAB     | 51 (0.02)  | 63 (0.98)  | 2.62 |
| 11-10 Area 2 | Gp4 | g.chr1:40747031C>T          | Silent            | ZMPSTE24 | p.S262S  | zinc metallopeptidase S   | 38 (0.00)  | 116 (0.39) | 1.03 |
| 11-10 Area 2 | Gp4 | g.chr13:20641451T>C         | Missense Mutation | ZMYM2    | p.F1125S | zinc finger, MYM-type     | 91 (0.01)  | 62 (0.21)  | 0.56 |
| 11-10 Area 2 | Gp4 | g.chr19:22154674T>C         | Silent            | ZNF208   | p.E1054E | zinc finger protein 208   | 184 (0.01) | 29 (0.66)  | 1.75 |
| 11-10 Area 2 | Gp4 | g.chr19:53304896C>T         | Missense Mutation | ZNF28    | p.S57N   | zinc finger protein 28    | 177 (0.00) | 16 (0.88)  | 2.33 |
| 11-10 Area 2 | Gp4 | g.chr1:90493196T>A          | Nonsense Mutation | ZNF326   | p.L473*  | zinc finger protein 326   | 25 (0.00)  | 26 (0.69)  | 1.85 |
| 11-10 Area 2 | Gp4 | g.chr19:11978239A>G         | Missense Mutation | ZNF439   | p.K119E  | zinc finger protein 439   | 69 (0.00)  | 57 (0.32)  | 0.84 |
| 11-10 Area 2 | Gp4 | g.chr19:58773270A>G         | Missense Mutation | ZNF544   | p.E433G  | zinc finger protein 544   | 103 (0.00) | 13 (0.54)  | 1.44 |

|              |     |                      |                   |            |          |                           |            |            |      |
|--------------|-----|----------------------|-------------------|------------|----------|---------------------------|------------|------------|------|
| 11-10 Area 2 | Gp4 | g.chr8:144732882C>T  | Silent            | ZNF623     | p.R280R  | zinc finger protein 623   | 62 (0.00)  | 13 (0.46)  | 1.23 |
| 11-12        | Gp3 | g.chr19:1043811A>G   | Missense Mutation | ABCA7      | p.N202D  | ATP-binding cassette, s1  | 28 (0.00)  | 238 (0.36) | 0.96 |
| 11-12        | Gp3 | g.chr19:1058163C>A   | Silent            | ABCA7      | p.R1544R | ATP-binding cassette, s1  | 29 (0.00)  | 154 (0.31) | 0.81 |
| 11-12        | Gp3 | g.chr7:20698171G>A   | Missense Mutation | ABCB5      | p.G527R  | ATP-binding cassette, s1  | 68 (0.00)  | 178 (0.21) | 0.57 |
| 11-12        | Gp3 | g.chr12:40012909T>G  | Missense Mutation | ABCD2      | p.K170T  | ATP-binding cassette, s1  | 35 (0.00)  | 212 (0.49) | 1.31 |
| 11-12        | Gp3 | g.chr21:43716369A>T  | Missense Mutation | ABCG1      | p.E623V  | ATP-binding cassette, s1  | 44 (0.00)  | 61 (0.43)  | 1.38 |
| 11-12        | Gp3 | g.chr2:44040375G>T   | Silent            | ABCG5      | p.T441T  | ATP-binding cassette, s1  | 29 (0.00)  | 234 (0.47) | 1.26 |
| 11-12        | Gp3 | g.chr2:204259559C>T  | Nonsense Mutation | ABI2       | p.R239*  | abl-interactor 2          | 79 (0.00)  | 78 (0.15)  | 0.41 |
| 11-12        | Gp3 | g.chr3:127398955G>T  | Missense Mutation | ABTB1      | p.R386L  | ankyrin repeat and BTB    | 35 (0.00)  | 360 (0.67) | 1.78 |
| 11-12        | Gp3 | g.chr4:118497049G>T  | lincRNA           | AC092661.1 |          |                           | 100 (0.00) | 137 (0.73) | 1.95 |
| 11-12        | Gp3 | g.chr2:804286C>A     | lincRNA           | AC113607.1 |          |                           | 30 (0.00)  | 13 (0.92)  | 3.00 |
| 11-12        | Gp3 | g.chr4:8391376G>A    | Silent            | ACOX3      | p.S462S  | acyl-CoA oxidase 3, pri:  | 64 (0.02)  | 283 (1.00) | 2.66 |
| 11-12        | Gp3 | g.chr4:8398674T>C    | Missense Mutation | ACOX3      | p.Y349C  | acyl-CoA oxidase 3, pri:  | 43 (0.00)  | 104 (0.24) | 0.64 |
| 11-12        | Gp3 | g.chr17:79478640T>C  | Missense Mutation | ACTG1      | p.T126A  | actin, gamma 1            | 17 (0.00)  | 157 (0.19) | 0.51 |
| 11-12        | Gp3 | g.chr9:111617457T>C  | Missense Mutation | ACTL7B     | p.I252V  | actin-like 7B             | 20 (0.00)  | 16 (0.31)  | 0.83 |
| 11-12        | Gp3 | g.chr7:152513620T>G  | Missense Mutation | ACTR3B     | p.L163V  | ARP3 actin-related prot   | 39 (0.00)  | 385 (0.15) | 0.40 |
| 11-12        | Gp3 | g.chr1:155030587C>A  | Missense Mutation | ADAM15     | p.S559R  | ADAM metallopeptidas      | 32 (0.00)  | 119 (0.75) | 1.99 |
| 11-12        | Gp3 | g.chr9:136302880T>C  | Missense Mutation | ADAMTS13   | p.C483R  | ADAM metallopeptidas      | 16 (0.00)  | 140 (0.24) | 0.63 |
| 11-12        | Gp3 | g.chr22:24837148G>T  | Missense Mutation | ADORA2A    | p.Q310H  | adenosine A2a receptor    | 33 (0.00)  | 123 (0.33) | 0.89 |
| 11-12        | Gp3 | g.chr17:10614228T>A  | Missense Mutation | ADPRM      | p.W266R  | ADP-ribose/CDP-alcohol    | 48 (0.00)  | 214 (0.98) | 2.60 |
| 11-12        | Gp3 | g.chr2:64779538C>A   | Missense Mutation | AFTPH      | p.F310L  | aftiphilin                | 24 (0.00)  | 23 (0.96)  | 2.55 |
| 11-12        | Gp3 | g.chr10:51464928A>G  | Missense Mutation | AGAP7      | p.S510P  |                           | 90 (0.00)  | 153 (0.25) | 0.66 |
| 11-12        | Gp3 | g.chr9:38396088G>T   | Missense Mutation | ALDH1B1    | p.D115Y  | aldehyde dehydrogenase    | 37 (0.00)  | 87 (0.60)  | 1.59 |
| 11-12        | Gp3 | g.chr3:125854451C>T  | Missense Mutation | ALDH1L1    | p.A477T  | aldehyde dehydrogenase    | 17 (0.00)  | 56 (0.20)  | 0.52 |
| 11-12        | Gp3 | g.chr8:8095880C>T    | RNA               | ALG1L13P   |          | asparagine-linked glyco:  | 33 (0.00)  | 58 (0.98)  | 2.62 |
| 11-12        | Gp3 | g.chr17:7976478C>G   | Missense Mutation | ALOX12B    | p.E638D  | arachidonate 12-lipoxyg   | 34 (0.00)  | 47 (0.15)  | 0.40 |
| 11-12        | Gp3 | g.chr17:7977055T>C   | Missense Mutation | ALOX12B    | p.T559A  | arachidonate 12-lipoxyg   | 26 (0.00)  | 152 (0.30) | 0.81 |
| 11-12        | Gp3 | g.chr11:46564246T>A  | Missense Mutation | AMBRA1     | p.S351C  | autophagy/beclin-1 regu   | 53 (0.00)  | 82 (0.26)  | 0.68 |
| 11-12        | Gp3 | g.chr3:49456718C>A   | Missense Mutation | AMT        | p.G224V  | aminomethyltransferase    | 36 (0.00)  | 193 (0.45) | 1.20 |
| 11-12        | Gp3 | g.chr13:111546513T>C | Silent            | ANKRD10    | p.P164P  | ankyrin repeat domain 1   | 149 (0.00) | 123 (0.34) | 0.91 |
| 11-12        | Gp3 | g.chr3:15755149C>A   | Splice Site       | ANKRD28    |          | ankyrin repeat domain 2   | 94 (0.00)  | 436 (0.19) | 0.51 |
| 11-12        | Gp3 | g.chr16:4755106C>A   | Silent            | ANKS3      | p.R286R  | ankyrin repeat and steril | 30 (0.00)  | 299 (0.35) | 0.94 |
| 11-12        | Gp3 | g.chr19:10692236G>T  | Missense Mutation | AP1M2      | p.S158Y  | adaptor-related protein c | 44 (0.00)  | 294 (0.22) | 0.58 |
| 11-12        | Gp3 | g.chr20:24944598T>A  | Missense Mutation | APMAP      | p.S368C  | adipocyte plasma memb     | 23 (0.00)  | 82 (0.26)  | 0.68 |
| 11-12        | Gp3 | g.chr16:25228723G>T  | Missense Mutation | AQP8       | p.G73W   | aquaporin 8               | 28 (0.00)  | 380 (0.69) | 1.85 |



|       |     |                      |                   |           |          |                                     |            |      |
|-------|-----|----------------------|-------------------|-----------|----------|-------------------------------------|------------|------|
| 11-12 | Gp3 | g.chr16:24942457C>A  | Missense Mutation | ARHGAP17  | p.Q721H  | Rho GTPase activating j80 (0.01)    | 478 (0.54) | 1.44 |
| 11-12 | Gp3 | g.chr16:24942654A>T  | Missense Mutation | ARHGAP17  | p.S656T  | Rho GTPase activating j69 (0.00)    | 394 (0.72) | 1.93 |
| 11-12 | Gp3 | g.chr12:57872331C>A  | Missense Mutation | ARHGAP9   | p.A176S  | Rho GTPase activating j41 (0.00)    | 156 (0.37) | 0.97 |
| 11-12 | Gp3 | g.chr6:157522152A>G  | Missense Mutation | ARID1B    | p.Y1475C | AT rich interactive dom 26 (0.00)   | 22 (0.41)  | 1.09 |
| 11-12 | Gp3 | g.chr5:149677567C>A  | Missense Mutation | ARSI      | p.S307I  | arylsulfatase family, me 21 (0.00)  | 67 (0.19)  | 0.52 |
| 11-12 | Gp3 | g.chr10:73912715C>A  | Nonsense Mutation | ASCC1     | p.E220*  | activating signal cointeg48 (0.00)  | 215 (0.37) | 0.98 |
| 11-12 | Gp3 | g.chr4:47584060G>A   | Silent            | ATP10D    | p.L1244L | ATPase, class V, type 1023 (0.00)   | 118 (0.52) | 1.38 |
| 11-12 | Gp3 | g.chr13:113510243G>C | Missense Mutation | ATP11A    | p.Q754H  | ATPase, class VI, type 142 (0.00)   | 164 (0.57) | 1.51 |
| 11-12 | Gp3 | g.chr1:44441472G>A   | Splice Site       | ATP6V0B   | p.G23E   | ATPase, H+ transportin;42 (0.00)    | 172 (0.55) | 1.46 |
| 11-12 | Gp3 | g.chr1:44441485C>G   | Silent            | ATP6V0B   | p.T27T   | ATPase, H+ transportin;45 (0.00)    | 163 (0.56) | 1.51 |
| 11-12 | Gp3 | g.chr3:142215354T>A  | Missense Mutation | ATR       | p.Y1916F | ATR serine/threonine ki25 (0.00)    | 31 (0.94)  | 2.49 |
| 11-12 | Gp3 | g.chr1:110031507G>C  | Silent            | ATXN7L2   | p.R274R  | ataxin 7-like 2 22 (0.00)           | 50 (0.16)  | 0.43 |
| 11-12 | Gp3 | g.chr1:1309405T>C    | Missense Mutation | AURKAIP1  | p.Q158R  | aurora kinase A interact 28 (0.00)  | 113 (0.17) | 0.45 |
| 11-12 | Gp3 | g.chr6:69684698G>A   | Silent            | BAI3      | p.V523V  | brain-specific angiogenε66 (0.00)   | 218 (0.22) | 0.60 |
| 11-12 | Gp3 | g.chr2:160242902C>T  | Missense Mutation | BAZ2B     | p.A1145T | bromodomain adjacent t73 (0.00)     | 37 (0.84)  | 2.23 |
| 11-12 | Gp3 | g.chr19:49299743G>C  | Missense Mutation | BCAT2     | p.T361S  | branched chain amino-a 57 (0.00)    | 430 (0.32) | 0.86 |
| 11-12 | Gp3 | g.chr2:32715162G>A   | Missense Mutation | BIRC6     | p.R2717Q | baculoviral IAP repeat c 128 (0.01) | 429 (0.99) | 2.63 |
| 11-12 | Gp3 | g.chr15:91263125C>T  | Intron            | BLM       |          | Bloom syndrome, RecQ85 (0.00)       | 40 (0.50)  | 1.33 |
| 11-12 | Gp3 | g.chr5:865696C>A     | Splice Site       | BRD9      | p.G509V  | bromodomain containin;28 (0.00)     | 11 (0.64)  | 1.70 |
| 11-12 | Gp3 | g.chr16:2259699C>A   | Missense Mutation | BRICD5    | p.E149D  | BRICHOS domain cont: 15 (0.00)      | 109 (0.24) | 0.64 |
| 11-12 | Gp3 | g.chr19:55815088C>A  | Silent            | BRSK1     | p.R89R   | BR serine/threonine kin:50 (0.00)   | 206 (0.56) | 1.49 |
| 11-12 | Gp3 | g.chr3:49695211G>T   | Missense Mutation | BSN       | p.S2741I | bassoon presynaptic cyt;27 (0.00)   | 82 (0.37)  | 0.98 |
| 11-12 | Gp3 | g.chr12:53693689C>A  | Nonsense Mutation | C12orf10  | p.C56*   | chromosome 12 open re 15 (0.00)     | 119 (0.45) | 1.19 |
| 11-12 | Gp3 | g.chr15:40855180G>A  | Missense Mutation | C15orf57  | p.T12I   | chromosome 15 open re 26 (0.00)     | 38 (0.42)  | 1.12 |
| 11-12 | Gp3 | g.chr17:42744444C>A  | Missense Mutation | C17orf104 | p.Q389K  | chromosome 17 open re 44 (0.00)     | 52 (0.40)  | 0.59 |
| 11-12 | Gp3 | g.chr1:150255931C>A  | Nonsense Mutation | C1orf51   | p.S85*   | 117 (0.01)                          | 51 (0.90)  | 2.41 |
| 11-12 | Gp3 | g.chr2:232458573C>A  | Missense Mutation | C2orf57   | p.A304D  | chromosome 2 open rea 18 (0.00)     | 27 (0.74)  | 1.98 |
| 11-12 | Gp3 | g.chr4:170663141C>T  | Silent            | C4orf27   | p.Q205Q  | chromosome 4 open rea 30 (0.00)     | 36 (0.97)  | 2.59 |
| 11-12 | Gp3 | g.chr9:130473650C>T  | Nonsense Mutation | C9orf117  | p.Q244*  | chromosome 9 open rea 31 (0.00)     | 11 (0.73)  | 1.94 |
| 11-12 | Gp3 | g.chr3:54537530C>T   | Silent            | CACNA2D3  | p.F131F  | calcium channel, voltag;107 (0.01)  | 276 (0.99) | 2.65 |
| 11-12 | Gp3 | g.chr12:49221371C>A  | Missense Mutation | CACNB3    | p.Q382K  | calcium channel, voltag;17 (0.00)   | 105 (0.35) | 0.94 |
| 11-12 | Gp3 | g.chr3:85131422G>A   | Intron            | CADM2     |          | cell adhesion molecule 217 (0.00)   | 26 (0.96)  | 2.56 |
| 11-12 | Gp3 | g.chr3:85305428C>T   | Intron            | CADM2     |          | cell adhesion molecule 2205 (0.00)  | 277 (0.76) | 2.03 |
| 11-12 | Gp3 | g.chr3:85625971A>T   | Intron            | CADM2     |          | cell adhesion molecule 2115 (0.00)  | 384 (0.88) | 2.33 |
| 11-12 | Gp3 | g.chr3:85802189A>G   | Intron            | CADM2     |          | cell adhesion molecule 246 (0.00)   | 263 (0.18) | 0.48 |

|       |     |                      |                   |         |          |                                    |            |      |
|-------|-----|----------------------|-------------------|---------|----------|------------------------------------|------------|------|
| 11-12 | Gp3 | g.chr3:85984553A>T   | Intron            | CADM2   |          | cell adhesion molecule 236 (0.00)  | 29 (0.34)  | 0.92 |
| 11-12 | Gp3 | g.chr10:5541181T>C   | Missense Mutation | CALML5  | p.K74R   | calmodulin-like 5 19 (0.00)        | 102 (0.15) | 0.39 |
| 11-12 | Gp3 | g.chr10:75608828T>C  | Missense Mutation | CAMK2G  | p.K154E  | calcium/calmodulin-dep51 (0.00)    | 75 (0.31)  | 0.82 |
| 11-12 | Gp3 | g.chr1:200827097T>A  | Silent            | CAMSAP2 | p.S1449S | calmodulin regulated sp21 (0.00)   | 29 (0.52)  | 1.38 |
| 11-12 | Gp3 | g.chr11:76831893C>A  | Missense Mutation | CAPN5   | p.F515L  | calpain 5 44 (0.00)                | 23 (0.74)  | 1.97 |
| 11-12 | Gp3 | g.chr11:34482816C>A  | Missense Mutation | CAT     | p.P359T  | catalase 36 (0.00)                 | 268 (0.33) | 0.89 |
| 11-12 | Gp3 | g.chr2:74701827G>T   | Missense Mutation | CCDC142 | p.T693K  | coiled-coil domain cont:29 (0.00)  | 165 (0.24) | 0.63 |
| 11-12 | Gp3 | g.chr11:124824703C>T | Silent            | CCDC15  | p.S25S   | coiled-coil domain cont:46 (0.00)  | 63 (0.51)  | 1.35 |
| 11-12 | Gp3 | g.chr17:80086423G>C  | Missense Mutation | CCDC57  | p.H765Q  | coiled-coil domain cont:15 (0.00)  | 83 (0.28)  | 0.74 |
| 11-12 | Gp3 | g.chr14:91770198G>C  | Missense Mutation | CCDC88C | p.T1161R | coiled-coil domain cont:34 (0.00)  | 517 (0.15) | 0.39 |
| 11-12 | Gp3 | g.chr14:91826016C>T  | Missense Mutation | CCDC88C | p.V104I  | coiled-coil domain cont:18 (0.00)  | 88 (0.33)  | 0.88 |
| 11-12 | Gp3 | g.chr11:6291905T>C   | Missense Mutation | CCKBR   | p.F228S  | cholecystokinin B recep54 (0.00)   | 195 (0.30) | 0.81 |
| 11-12 | Gp3 | g.chr14:99973460T>C  | Silent            | CCNK    | p.L365L  | cyclin K 239 (0.00)                | 35 (0.17)  | 0.46 |
| 11-12 | Gp3 | g.chr22:17072697A>G  | Silent            | CCT8L2  | p.F248F  | chaperonin containing T69 (0.00)   | 89 (0.19)  | 0.51 |
| 11-12 | Gp3 | g.chr16:30364752C>A  | Missense Mutation | CD2BP2  | p.D249Y  | CD2 (cytoplasmic tail) t40 (0.00)  | 72 (0.46)  | 1.22 |
| 11-12 | Gp3 | g.chr10:73464788G>T  | Nonsense Mutation | CDH23   | p.E957*  | cadherin-related 23 37 (0.03)      | 371 (0.23) | 0.62 |
| 11-12 | Gp3 | g.chr10:73571101A>G  | Missense Mutation | CDH23   | p.E3041G | cadherin-related 23 44 (0.00)      | 75 (0.17)  | 0.46 |
| 11-12 | Gp3 | g.chr22:17990896G>T  | Missense Mutation | CECR2   | p.D145Y  | cat eye syndrome chrom:96 (0.00)   | 69 (0.78)  | 2.09 |
| 11-12 | Gp3 | g.chr22:46932211C>T  | Missense Mutation | CELSR1  | p.G286E  | cadherin, EGF LAG sev21 (0.00)     | 123 (0.25) | 0.67 |
| 11-12 | Gp3 | g.chr20:34091454G>T  | Missense Mutation | CEP250  | p.D1753Y | centrosomal protein 25032 (0.00)   | 65 (0.66)  | 1.76 |
| 11-12 | Gp3 | g.chr1:6195129C>G    | Intron            | CHD5    |          | chromodomain helicase 58 (0.02)    | 367 (0.99) | 2.64 |
| 11-12 | Gp3 | g.chr1:6195483T>C    | Intron            | CHD5    |          | chromodomain helicase 40 (0.00)    | 13 (0.46)  | 1.23 |
| 11-12 | Gp3 | g.chr1:6217555C>G    | Intron            | CHD5    |          | chromodomain helicase 26 (0.00)    | 206 (0.58) | 1.54 |
| 11-12 | Gp3 | g.chr1:6228782C>A    | Intron            | CHD5    |          | chromodomain helicase 24 (0.00)    | 48 (0.40)  | 1.06 |
| 11-12 | Gp3 | g.chr14:21873420A>G  | Silent            | CHD8    | p.L1085L | chromodomain helicase 76 (0.00)    | 69 (0.87)  | 2.32 |
| 11-12 | Gp3 | g.chr2:220404360C>G  | Silent            | CHPF    | p.L691L  | chondroitin polymerizin18 (0.00)   | 18 (0.50)  | 1.33 |
| 11-12 | Gp3 | g.chr7:150932289C>A  | Missense Mutation | CHPF2   | p.A132D  | chondroitin polymerizin45 (0.00)   | 38 (0.32)  | 0.84 |
| 11-12 | Gp3 | g.chr11:62677678C>A  | Nonsense Mutation | CHRM1   | p.E299*  | cholinergic receptor, mu26 (0.00)  | 307 (0.18) | 0.47 |
| 11-12 | Gp3 | g.chr15:78882438C>A  | Nonsense Mutation | CHRNA5  | p.C235*  | cholinergic receptor, nic99 (0.00) | 48 (0.23)  | 0.61 |
| 11-12 | Gp3 | g.chr7:2473390C>T    | Silent            | CHST12  | p.T372T  | carbohydrate (chondroit75 (0.00)   | 35 (0.26)  | 0.69 |
| 11-12 | Gp3 | g.chr19:34263725C>A  | Missense Mutation | CHST8   | p.F344L  | carbohydrate (N-acetyl19 (0.00)    | 282 (0.60) | 1.59 |
| 11-12 | Gp3 | g.chr19:42795789G>T  | Silent            | CIC     | p.L1835L | capicua transcriptional r25 (0.00) | 173 (0.23) | 0.60 |
| 11-12 | Gp3 | g.chr19:36508797T>A  | Missense Mutation | CLIP3   | p.Q427L  | CAP-GLY domain cont:28 (0.00)      | 247 (0.41) | 1.09 |
| 11-12 | Gp3 | g.chr11:66050233C>A  | Silent            | CNIH2   | p.I60I   | cornichon family AMP/24 (0.00)     | 52 (0.85)  | 2.26 |
| 11-12 | Gp3 | g.chr1:32164121T>A   | Missense Mutation | COL16A1 | p.Y118F  | collagen, type XVI, alph17 (0.00)  | 156 (0.96) | 2.56 |

|       |     |                      |                   |              |          |                                               |            |           |      |
|-------|-----|----------------------|-------------------|--------------|----------|-----------------------------------------------|------------|-----------|------|
| 11-12 | Gp3 | g.chr2:189849504C>A  | Missense Mutation | COL3A1       | p.S33Y   | collagen, type III, alpha 22 (0.00)           | 57 (0.25)  | 0.65      |      |
| 11-12 | Gp3 | g.chr19:10116233C>G  | Splice Site       | COL5A3       |          | collagen, type V, alpha 137 (0.00)            | 30 (0.50)  | 1.33      |      |
| 11-12 | Gp3 | g.chr3:48606866G>A   | Missense Mutation | COL7A1       | p.P2543L | collagen, type VII, alpha 35 (0.03)           | 98 (0.73)  | 1.96      |      |
| 11-12 | Gp3 | g.chr20:34219065C>T  | Missense Mutation | CPNE1        | p.V278M  | copine I 114 (0.00)                           | 55 (0.15)  | 0.39      |      |
| 11-12 | Gp3 | g.chr11:46333943G>T  | Missense Mutation | CREB3L1      | p.G274V  | cAMP responsive element 19 (0.00)             | 219 (0.84) | 2.24      |      |
| 11-12 | Gp3 | g.chr1:75172617C>T   | Missense Mutation | CRYZ         | p.S265N  | crystallin, zeta (quinone 27 (0.00)           | 70 (0.90)  | 2.40      |      |
| 11-12 | Gp3 | g.chr17:61950564A>G  | Missense Mutation | CSH2         | p.L49P   | chorionic somatomammotropin 90 (0.00)         | 35 (0.40)  | 1.07      |      |
| 11-12 | Gp3 | g.chr15:75091033C>A  | Nonsense Mutation | CSK          | p.C31*   | c-src tyrosine kinase 26 (0.00)               | 70 (0.21)  | 0.57      |      |
| 11-12 | Gp3 | g.chr1:33985183G>A   | Nonsense Mutation | CSMD2        | p.Q3611* | CUB and Sushi multiple domain 41 (0.02)       | 68 (0.25)  | 0.67      |      |
| 11-12 | Gp3 | g.chr1:34401434G>T   | Silent            | CSMD2        | p.G213G  | CUB and Sushi multiple domain 27 (0.00)       | 145 (0.31) | 0.83      |      |
| 11-12 | Gp3 | g.chr20:23669409G>T  | Silent            | CST4         | p.R66R   | cystatin S 27 (0.00)                          | 31 (0.42)  | 1.12      |      |
| 11-12 | Gp3 | g.chr19:51457369G>T  | RNA               | CTB-147C22.8 |          |                                               | 21 (0.00)  | 25 (0.28) | 0.75 |
| 11-12 | Gp3 | g.chr4:1244873C>A    | RNA               | CTBP1-AS2    |          | CTBP1 antisense RNA 30 (0.00)                 | 20 (0.30)  | 0.80      |      |
| 11-12 | Gp3 | g.chr10:104183294C>A | Missense Mutation | CUEDC2       | p.Q251H  | CUE domain containing 140 (0.00)              | 46 (0.96)  | 2.55      |      |
| 11-12 | Gp3 | g.chr22:43024266G>A  | Missense Mutation | CYB5R3       | p.P119S  | cytochrome b5 reductase 39 (0.00)             | 57 (0.60)  | 1.59      |      |
| 11-12 | Gp3 | g.chr1:47489575C>A   | Missense Mutation | CYP4X1       | p.A29D   | cytochrome P450, family 20 (0.00)             | 58 (0.69)  | 1.84      |      |
| 11-12 | Gp3 | g.chr2:242689643G>T  | Nonsense Mutation | D2HGDH       | p.E311*  | D-2-hydroxyglutarate dehydrogenase 27 (0.00)  | 299 (0.53) | 1.42      |      |
| 11-12 | Gp3 | g.chr9:124362756C>G  | Intron            | DAB2IP       |          | DAB2 interacting protein 52 (0.00)            | 223 (0.40) | 1.06      |      |
| 11-12 | Gp3 | g.chr9:124408123G>A  | Intron            | DAB2IP       |          | DAB2 interacting protein 40 (0.00)            | 64 (0.42)  | 1.12      |      |
| 11-12 | Gp3 | g.chr9:124408135C>T  | Intron            | DAB2IP       |          | DAB2 interacting protein 40 (0.03)            | 89 (0.55)  | 1.47      |      |
| 11-12 | Gp3 | g.chr9:124430992A>G  | Intron            | DAB2IP       |          | DAB2 interacting protein 39 (0.00)            | 23 (0.26)  | 0.70      |      |
| 11-12 | Gp3 | g.chr9:124463070A>G  | Intron            | DAB2IP       |          | DAB2 interacting protein 54 (0.00)            | 10 (0.80)  | 2.13      |      |
| 11-12 | Gp3 | g.chr9:124495461T>A  | Intron            | DAB2IP       |          | DAB2 interacting protein 48 (0.00)            | 55 (0.96)  | 2.57      |      |
| 11-12 | Gp3 | g.chr9:124505647C>A  | Intron            | DAB2IP       |          | DAB2 interacting protein 116 (0.00)           | 43 (0.35)  | 0.93      |      |
| 11-12 | Gp3 | g.chr9:124526738C>T  | Intron            | DAB2IP       |          | DAB2 interacting protein 19 (0.00)            | 48 (0.67)  | 1.78      |      |
| 11-12 | Gp3 | g.chr9:124542309C>T  | Intron            | DAB2IP       |          | DAB2 interacting protein 192 (0.00)           | 66 (0.30)  | 0.81      |      |
| 11-12 | Gp3 | g.chr11:61105544C>A  | Silent            | DAK          | p.L45L   | dihydroxyacetone kinase 21 (0.00)             | 245 (0.42) | 1.12      |      |
| 11-12 | Gp3 | g.chr1:173794474G>A  | Missense Mutation | DARS2        | p.S36N   | aspartyl-tRNA synthetase 62 (0.02)            | 41 (0.44)  | 1.17      |      |
| 11-12 | Gp3 | g.chr4:41984540G>A   | Missense Mutation | DCAF4L1      | p.R244H  | DDB1 and CUL4 associated protein 29 (0.00)    | 172 (0.91) | 2.43      |      |
| 11-12 | Gp3 | g.chr11:6645409T>A   | Missense Mutation | DCHS1        | p.T2500S | dachshund cadherin-related protein 24 (0.00)  | 39 (0.64)  | 1.71      |      |
| 11-12 | Gp3 | g.chr5:112349071G>A  | Missense Mutation | DCP2         | p.E385K  | decapping mRNA 2 53 (0.00)                    | 25 (0.72)  | 1.92      |      |
| 11-12 | Gp3 | g.chr5:112349091T>C  | Silent            | DCP2         | p.C391C  | decapping mRNA 2 41 (0.00)                    | 38 (0.39)  | 1.05      |      |
| 11-12 | Gp3 | g.chr11:61089770G>T  | Missense Mutation | DDB1         | p.Q374K  | damage-specific DNA binding protein 34 (0.00) | 97 (0.37)  | 0.99      |      |
| 11-12 | Gp3 | g.chr5:176942978A>T  | Missense Mutation | DDX41        | p.V129E  | DEAD (Asp-Glu-Ala-A) 54 (0.02)                | 233 (0.36) | 0.96      |      |
| 11-12 | Gp3 | g.chr12:132625057C>A | Silent            | DDX51        | p.G528G  | DEAD (Asp-Glu-Ala-A) 15 (0.00)                | 319 (0.39) | 1.04      |      |

|       |     |                      |                   |         |          |                           |            |            |      |
|-------|-----|----------------------|-------------------|---------|----------|---------------------------|------------|------------|------|
| 11-12 | Gp3 | g.chr11:674589G>A    | Nonsense Mutation | DEAF1   | p.R484*  | DEAF1 transcription fac   | 115 (0.00) | 63 (0.41)  | 1.10 |
| 11-12 | Gp3 | g.chr8:124027752C>G  | Missense Mutation | DERL1   | p.A231P  | derlin 1                  | 87 (0.00)  | 27 (0.67)  | 1.78 |
| 11-12 | Gp3 | g.chr2:220284876C>G  | Splice Site       | DES     | p.A213G  | desmin                    | 27 (0.00)  | 218 (0.25) | 0.67 |
| 11-12 | Gp3 | g.chr7:24745816G>C   | Silent            | DFNA5   | p.V390V  | deafness, autosomal dor   | 105 (0.01) | 348 (0.42) | 1.13 |
| 11-12 | Gp3 | g.chr2:234368885G>T  | Nonsense Mutation | DGKD    | p.E959*  | diacylglycerol kinase, d  | 67 (0.00)  | 11 (0.82)  | 2.18 |
| 11-12 | Gp3 | g.chr12:122701087C>T | Nonsense Mutation | DIABLO  | p.W157*  | diablo, IAP-binding mit   | 43 (0.00)  | 34 (0.94)  | 2.51 |
| 11-12 | Gp3 | g.chr10:403837A>G    | Silent            | DIP2C   | p.S945S  | DIP2 disco-interacting p  | 33 (0.00)  | 156 (0.28) | 0.74 |
| 11-12 | Gp3 | g.chr1:231830493T>C  | Missense Mutation | DISC1   | p.L330P  | disrupted in schizophre   | 15 (0.00)  | 56 (0.14)  | 0.38 |
| 11-12 | Gp3 | g.chr11:111933145C>T | Silent            | DLAT    | p.S505S  | dihydroliipoamide S-ace   | 117 (0.01) | 152 (0.99) | 2.65 |
| 11-12 | Gp3 | g.chr10:79581271G>T  | Missense Mutation | DLG5    | p.L991M  | discs, large homolog 5 (  | 30 (0.00)  | 122 (0.16) | 0.42 |
| 11-12 | Gp3 | g.chr8:1626632C>A    | Silent            | DLGAP2  | p.P767P  | discs, large (Drosophila  | 46 (0.00)  | 60 (0.83)  | 2.22 |
| 11-12 | Gp3 | g.chr7:96653759G>A   | Silent            | DLX5    | p.C59C   | distal-less homeobox 5    | 36 (0.00)  | 70 (0.79)  | 2.10 |
| 11-12 | Gp3 | g.chr14:50100192A>G  | Missense Mutation | DNAAF2  | p.L559S  | dynein, axonemal, assen   | 32 (0.00)  | 80 (0.47)  | 1.27 |
| 11-12 | Gp3 | g.chr19:55676798C>G  | Missense Mutation | DNAAF3  | p.A156P  | dynein, axonemal, assen   | 49 (0.00)  | 221 (0.39) | 1.04 |
| 11-12 | Gp3 | g.chr3:57348520A>T   | Splice Site       | DNAH12  |          | dynein, axonemal, heav    | 93 (0.00)  | 260 (1.00) | 2.66 |
| 11-12 | Gp3 | g.chr3:57348521C>T   | Splice Site       | DNAH12  |          | dynein, axonemal, heav    | 92 (0.00)  | 263 (1.00) | 2.66 |
| 11-12 | Gp3 | g.chr11:6520136G>A   | Missense Mutation | DNHD1   | p.E231K  | dynein heavy chain dom    | 25 (0.00)  | 38 (0.45)  | 1.19 |
| 11-12 | Gp3 | g.chr15:100340102G>T | RNA               | DNM1P46 |          | DNM1 pseudogene 46        | 24 (0.00)  | 147 (0.76) | 2.03 |
| 11-12 | Gp3 | g.chr15:100340166G>C | RNA               | DNM1P46 |          | DNM1 pseudogene 46        | 21 (0.00)  | 13 (0.54)  | 1.44 |
| 11-12 | Gp3 | g.chr1:172356389G>C  | Missense Mutation | DNM3    | p.M721I  | dynamamin 3               | 34 (0.00)  | 44 (0.61)  | 1.64 |
| 11-12 | Gp3 | g.chr21:37618929G>A  | Missense Mutation | DOPEY2  | p.D1551N | dopey family member 2     | 39 (0.00)  | 117 (0.18) | 0.48 |
| 11-12 | Gp3 | g.chr9:140468757C>T  | Silent            | DPH7    | p.T181T  | diphthamide biosynthesi   | 104 (0.00) | 22 (0.50)  | 1.33 |
| 11-12 | Gp3 | g.chr11:117389242G>T | Nonsense Mutation | DSCAML1 | p.Y543*  | Down syndrome cell adl    | 122 (0.00) | 329 (0.77) | 2.06 |
| 11-12 | Gp3 | g.chr6:7585834A>G    | Missense Mutation | DSP     | p.K2780R | desmoplakin               | 101 (0.00) | 21 (0.43)  | 1.14 |
| 11-12 | Gp3 | g.chr15:49924476G>A  | Missense Mutation | DTWD1   | p.E129K  | DTW domain containin      | 17 (0.00)  | 210 (0.79) | 2.11 |
| 11-12 | Gp3 | g.chr15:45448069G>T  | Missense Mutation | DUOX1   | p.R1215L | dual oxidase 1            | 41 (0.00)  | 98 (0.20)  | 0.54 |
| 11-12 | Gp3 | g.chr6:348172G>T     | Missense Mutation | DUSP22  | p.W111C  | dual specificity phospho  | 33 (0.00)  | 53 (0.36)  | 0.96 |
| 11-12 | Gp3 | g.chr11:85989556C>T  | Nonsense Mutation | EED     | p.R359*  | embryonic ectoderm dev    | 41 (0.00)  | 229 (0.22) | 0.58 |
| 11-12 | Gp3 | g.chr11:65348738C>A  | Missense Mutation | EHBP1L1 | p.P254T  | EH domain binding prot    | 16 (0.00)  | 77 (0.60)  | 1.59 |
| 11-12 | Gp3 | g.chr19:48244401G>A  | Silent            | EHD2    | p.K448K  | EH-domain containing      | 24 (0.00)  | 241 (0.25) | 0.67 |
| 11-12 | Gp3 | g.chr22:36920733G>C  | Missense Mutation | EIF3D   | p.F72L   | eukaryotic translation in | 64 (0.00)  | 20 (0.95)  | 2.53 |
| 11-12 | Gp3 | g.chr22:29611524C>T  | Missense Mutation | EMID1   | p.T75I   | EMI domain containing     | 27 (0.00)  | 64 (0.56)  | 1.50 |
| 11-12 | Gp3 | g.chr16:10631905C>A  | Missense Mutation | EMP2    | p.A66S   | epithelial membrane pro   | 49 (0.00)  | 219 (0.26) | 0.68 |
| 11-12 | Gp3 | g.chr9:130580597G>T  | Missense Mutation | ENG     | p.D496E  | endoglin                  | 24 (0.00)  | 150 (0.19) | 0.52 |
| 11-12 | Gp3 | g.chr1:23219388G>C   | Missense Mutation | EPHB2   | p.E480D  | EPH receptor B2           | 50 (0.00)  | 222 (0.57) | 1.53 |

|       |     |                      |                   |            |          |                           |            |            |      |
|-------|-----|----------------------|-------------------|------------|----------|---------------------------|------------|------------|------|
| 11-12 | Gp3 | g.chr3:184299163C>A  | Missense Mutation | EPHB3      | p.A952E  | EPH receptor B3           | 16 (0.00)  | 127 (0.94) | 2.52 |
| 11-12 | Gp3 | g.chr7:100417886C>A  | Nonsense Mutation | EPHB4      | p.G281*  | EPH receptor B4           | 26 (0.00)  | 221 (0.62) | 1.67 |
| 11-12 | Gp3 | g.chr19:56196945G>T  | Missense Mutation | EPN1       | p.D138Y  | epsin 1                   | 22 (0.00)  | 222 (0.71) | 1.89 |
| 11-12 | Gp3 | g.chr1:220219716A>G  | Silent            | EPRS       | p.S5S    | glutamyl-prolyl-tRNA s    | 26 (0.00)  | 51 (0.18)  | 0.47 |
| 11-12 | Gp3 | g.chr10:50725100C>A  | Nonsense Mutation | ERCC6-PGBD | p.E489*  | ERCC6-PGBD3 readthr       | 21 (0.00)  | 43 (0.70)  | 1.86 |
| 11-12 | Gp3 | g.chr21:39782550G>T  | Intron            | ERG        |          | v-ets avian erythroblastc | 63 (0.00)  | 178 (0.46) | 1.23 |
| 11-12 | Gp3 | g.chr21:39787669A>T  | Intron            | ERG        |          | v-ets avian erythroblastc | 22 (0.00)  | 55 (0.65)  | 1.75 |
| 11-12 | Gp3 | g.chr21:39839457G>A  | Intron            | ERG        |          | v-ets avian erythroblastc | 93 (0.01)  | 618 (1.00) | 2.66 |
| 11-12 | Gp3 | g.chr21:39941204G>A  | Intron            | ERG        |          | v-ets avian erythroblastc | 170 (0.01) | 28 (0.79)  | 2.10 |
| 11-12 | Gp3 | g.chr16:20809834T>A  | Missense Mutation | ERI2       | p.S337C  | ERI1 exoribonuclease f    | 21 (0.00)  | 10 (0.50)  | 1.33 |
| 11-12 | Gp3 | g.chr6:152129092G>C  | Silent            | ESR1       | p.L15L   | estrogen receptor 1       | 21 (0.00)  | 55 (0.55)  | 1.45 |
| 11-12 | Gp3 | g.chr21:33887479A>T  | Missense Mutation | EVA1C      | p.R435S  | eva-1 homolog C (C. ele   | 150 (0.01) | 151 (0.99) | 2.65 |
| 11-12 | Gp3 | g.chr17:29632190A>G  | Silent            | EVI2B      | p.F146F  | ecotropic viral integrati | 90 (0.00)  | 141 (0.99) | 2.63 |
| 11-12 | Gp3 | g.chr14:69702849A>G  | Missense Mutation | EXD2       | p.Y379C  | exonuclease 3'-5' domai   | 37 (0.00)  | 32 (0.19)  | 0.50 |
| 11-12 | Gp3 | g.chr11:108381552T>A | Missense Mutation | EXPH5      | p.K1561M | exophilin 5               | 62 (0.00)  | 28 (0.21)  | 0.57 |
| 11-12 | Gp3 | g.chr11:108384209G>A | Silent            | EXPH5      | p.T675T  | exophilin 5               | 19 (0.00)  | 83 (0.99)  | 2.63 |
| 11-12 | Gp3 | g.chr11:58920370T>C  | Missense Mutation | FAM111A    | p.V410A  | family with sequence sim  | 109 (0.00) | 122 (0.25) | 0.68 |
| 11-12 | Gp3 | g.chr10:88946944C>A  | Silent            | FAM35A     | p.L765L  | family with sequence sim  | 113 (0.00) | 12 (0.83)  | 2.22 |
| 11-12 | Gp3 | g.chr1:809550A>G     | lincRNA           | FAM41C     |          | family with sequence sim  | 145 (0.00) | 58 (0.55)  | 1.47 |
| 11-12 | Gp3 | g.chr5:137681106C>A  | Silent            | FAM53C     | p.R243R  | family with sequence sim  | 18 (0.00)  | 149 (0.21) | 0.55 |
| 11-12 | Gp3 | g.chr15:59064306C>A  | Missense Mutation | FAM63B     | p.P238T  | family with sequence sim  | 16 (0.00)  | 145 (0.22) | 0.59 |
| 11-12 | Gp3 | g.chr11:67564279G>T  | RNA               | FAM86C2P   |          | family with sequence sim  | 52 (0.00)  | 187 (0.17) | 0.46 |
| 11-12 | Gp3 | g.chr3:75475710C>A   | RNA               | FAM86DP    |          | family with sequence sim  | 55 (0.00)  | 409 (0.19) | 0.64 |
| 11-12 | Gp3 | g.chr12:8374609C>T   | Missense Mutation | FAM90A1    | p.G402R  | family with sequence sim  | 17 (0.00)  | 87 (0.87)  | 2.33 |
| 11-12 | Gp3 | g.chr13:99047494C>A  | Missense Mutation | FARP1      | p.T393N  | FERM, RhoGEF (ARH)        | 27 (0.00)  | 46 (0.83)  | 2.20 |
| 11-12 | Gp3 | g.chr11:92533590G>T  | Missense Mutation | FAT3       | p.V2321F | FAT atypical cadherin 3   | 123 (0.01) | 224 (0.49) | 1.30 |
| 11-12 | Gp3 | g.chr1:207134036C>T  | Silent            | FCAMR      | p.T395T  | Fc receptor, IgA, IgM, h  | 69 (0.01)  | 169 (0.73) | 1.96 |
| 11-12 | Gp3 | g.chr19:40368357C>T  | Missense Mutation | FCGBP      | p.A4331T | Fc fragment of IgG bind   | 27 (0.00)  | 29 (0.66)  | 1.75 |
| 11-12 | Gp3 | g.chr1:149759999G>A  | Missense Mutation | FCGR1A     | p.D129N  | Fc fragment of IgG, higl  | 65 (0.00)  | 10 (0.70)  | 1.87 |
| 11-12 | Gp3 | g.chr19:4792640C>A   | Silent            | FEM1A      | p.P258P  | fem-1 homolog a (C. ele   | 40 (0.00)  | 135 (0.22) | 0.59 |
| 11-12 | Gp3 | g.chr19:35850519G>A  | Missense Mutation | FFAR3      | p.V243M  | free fatty acid receptor  | 348 (0.02) | 95 (0.16)  | 0.42 |
| 11-12 | Gp3 | g.chrX:137793040C>A  | Missense Mutation | FGF13      | p.K42N   | fibroblast growth factor  | 18 (0.00)  | 64 (0.56)  | 0.94 |
| 11-12 | Gp3 | g.chr13:28608046C>A  | Missense Mutation | FLT3       | p.Q640H  | fms-related tyrosine kin  | 30 (0.00)  | 47 (0.47)  | 1.25 |
| 11-12 | Gp3 | g.chr1:171303883G>A  | Nonsense Mutation | FMO4       | p.W387*  | flavin containing monoc   | 46 (0.00)  | 25 (0.52)  | 1.39 |
| 11-12 | Gp3 | g.chr14:65521361G>T  | Missense Mutation | FNTB       | p.G379V  | farnesyltransferase, CA   | 21 (0.00)  | 86 (0.16)  | 0.43 |

|       |     |                      |                   |          |         |                           |            |            |      |
|-------|-----|----------------------|-------------------|----------|---------|---------------------------|------------|------------|------|
| 11-12 | Gp3 | g.chr19:46375835G>T  | Missense Mutation | FOXA3    | p.W191L | forkhead box A3           | 20 (0.00)  | 61 (0.31)  | 0.83 |
| 11-12 | Gp3 | g.chr17:80529731G>A  | Silent            | FOXK2    | p.A298A | forkhead box K2           | 15 (0.00)  | 11 (0.82)  | 2.18 |
| 11-12 | Gp3 | g.chr6:41555138G>A   | Missense Mutation | FOXP4    | p.G254S | forkhead box P4           | 64 (0.00)  | 95 (0.34)  | 0.90 |
| 11-12 | Gp3 | g.chr9:14808108C>T   | Missense Mutation | FREM1    | p.C973Y | FRAS1 related extracell   | 100 (0.00) | 12 (0.75)  | 2.00 |
| 11-12 | Gp3 | g.chr14:52186954G>T  | Missense Mutation | FRMD6    | p.K394N | FERM domain containi      | 77 (0.00)  | 33 (0.45)  | 1.21 |
| 11-12 | Gp3 | g.chr7:5642964A>G    | Silent            | FSCN1    | p.K303K | fascin actin-bundling pr  | 22 (0.00)  | 194 (0.15) | 0.40 |
| 11-12 | Gp3 | g.chr5:161302580C>T  | Missense Mutation | GABRA1   | p.A164V | gamma-aminobutyric ac     | 92 (0.00)  | 25 (0.92)  | 2.45 |
| 11-12 | Gp3 | g.chr22:30951078G>T  | Silent            | GAL3ST1  | p.L378L | galactose-3-O-sulfotran   | 15 (0.00)  | 25 (0.28)  | 0.75 |
| 11-12 | Gp3 | g.chr3:115394923C>G  | Missense Mutation | GAP43    | p.H68D  | growth associated protei  | 104 (0.00) | 47 (0.98)  | 2.61 |
| 11-12 | Gp3 | g.chr1:155184219G>A  | RNA               | GBAP1    |         | glucosidase, beta, acid   | 53 (0.00)  | 122 (0.99) | 2.64 |
| 11-12 | Gp3 | g.chr9:136029216G>T  | Silent            | GBGT1    | p.V264V | globoside alpha-1,3-N-a   | 32 (0.00)  | 36 (0.97)  | 2.59 |
| 11-12 | Gp3 | g.chr1:89847301C>A   | Missense Mutation | GBP6     | p.A307E | guanylate binding protei  | 42 (0.00)  | 35 (0.97)  | 2.59 |
| 11-12 | Gp3 | g.chr7:127224840C>A  | Missense Mutation | GCC1     | p.A133S | GRIP and coiled-coil do   | 41 (0.00)  | 19 (0.68)  | 1.82 |
| 11-12 | Gp3 | g.chr5:132197623T>A  | Missense Mutation | GDF9     | p.E341D | growth differentiation fa | 39 (0.00)  | 58 (0.50)  | 1.33 |
| 11-12 | Gp3 | g.chr7:932004T>C     | Missense Mutation | GET4     | p.F232S | golgi to ER traffic prote | 30 (0.00)  | 49 (0.18)  | 0.49 |
| 11-12 | Gp3 | g.chr9:135866384C>G  | Missense Mutation | GFI1B    | p.Q314E | growth factor independe   | 20 (0.00)  | 88 (0.97)  | 2.58 |
| 11-12 | Gp3 | g.chr3:158408058T>C  | Silent            | GFM1     | p.H672H | G elongation factor, mit  | 70 (0.00)  | 103 (0.22) | 0.60 |
| 11-12 | Gp3 | g.chr17:73240742C>T  | Silent            | GGA3     | p.K14K  | golgi-associated, gamm    | 158 (0.00) | 49 (0.39)  | 1.03 |
| 11-12 | Gp3 | g.chr12:75785024G>T  | Missense Mutation | GLIPR1L2 | p.R43I  | GLI pathogenesis-relate   | 67 (0.01)  | 325 (0.42) | 1.13 |
| 11-12 | Gp3 | g.chrX:102974050G>A  | Silent            | GLRA4    | p.L290L | glycine receptor, alpha   | 57 (0.00)  | 11 (0.91)  | 1.52 |
| 11-12 | Gp3 | g.chr9:131020069C>A  | Splice Site       | GOLGA2   | p.G844* | golgin A2                 | 237 (0.00) | 197 (0.74) | 1.96 |
| 11-12 | Gp3 | g.chr8:145139345T>C  | Silent            | GPAA1    | p.D281D | glycosylphosphatidylin    | 16 (0.00)  | 117 (0.39) | 1.05 |
| 11-12 | Gp3 | g.chr17:72365659G>A  | Missense Mutation | GPR142   | p.G99E  | G protein-coupled recep   | 28 (0.00)  | 44 (0.68)  | 1.82 |
| 11-12 | Gp3 | g.chr1:9164655G>T    | Silent            | GPR157   | p.I277I | G protein-coupled recep   | 16 (0.00)  | 67 (0.31)  | 0.84 |
| 11-12 | Gp3 | g.chr17:36499361C>G  | Missense Mutation | GPR179   | p.Q104H | G protein-coupled recep   | 29 (0.00)  | 192 (0.18) | 0.49 |
| 11-12 | Gp3 | g.chr2:133174829A>G  | Missense Mutation | GPR39    | p.M72V  | G protein-coupled recep   | 94 (0.00)  | 21 (0.24)  | 0.63 |
| 11-12 | Gp3 | g.chr19:35500063C>A  | Missense Mutation | GRAMD1A  | p.P17T  | GRAM domain containi      | 16 (0.00)  | 248 (0.19) | 0.52 |
| 11-12 | Gp3 | g.chr17:37898926C>A  | Missense Mutation | GRB7     | p.S88Y  | growth factor receptor-b  | 21 (0.00)  | 20 (0.45)  | 1.20 |
| 11-12 | Gp3 | g.chr12:124144445A>G | Missense Mutation | GTF2H3   | p.E263G | general transcription fac | 111 (0.00) | 29 (0.72)  | 1.93 |
| 11-12 | Gp3 | g.chr5:21491512C>T   | RNA               | GUSBP1   |         | glucuronidase, beta pset  | 515 (0.00) | 39 (0.18)  | 0.48 |
| 11-12 | Gp3 | g.chr1:155255575G>T  | Missense Mutation | HCN3     | p.D433Y | hyperpolarization activa  | 27 (0.00)  | 100 (0.42) | 1.12 |
| 11-12 | Gp3 | g.chr2:240005875C>A  | Silent            | HDAC4    | p.V831V | histone deacetylase 4     | 15 (0.00)  | 236 (0.38) | 1.01 |
| 11-12 | Gp3 | g.chr7:18544475G>A   | Intron            | HDAC9    |         | histone deacetylase 9     | 41 (0.00)  | 18 (0.72)  | 1.93 |
| 11-12 | Gp3 | g.chr7:18948568C>T   | Intron            | HDAC9    |         | histone deacetylase 9     | 52 (0.00)  | 16 (0.94)  | 2.50 |
| 11-12 | Gp3 | g.chr6:125598297G>A  | Silent            | HDDC2    | p.D156D | HD domain containing      | 278 (0.01) | 112 (0.99) | 2.64 |

|       |     |                      |                   |           |          |                           |            |            |      |
|-------|-----|----------------------|-------------------|-----------|----------|---------------------------|------------|------------|------|
| 11-12 | Gp3 | g.chr14:73989776C>A  | Missense Mutation | HEATR4    | p.M27I   | HEAT repeat containing    | 47 (0.00)  | 103 (0.45) | 1.19 |
| 11-12 | Gp3 | g.chr4:185941491G>T  | Silent            | HELT      | p.L98L   | helt bHLH transcription   | 50 (0.02)  | 45 (0.60)  | 1.60 |
| 11-12 | Gp3 | g.chr11:124794862G>C | Missense Mutation | HEPACAM   | p.D63E   | hepatic and glial cell ad | 31 (0.00)  | 13 (0.69)  | 1.85 |
| 11-12 | Gp3 | g.chr15:20589799G>T  | RNA               | HERC2P3   |          | hect domain and RLD 2     | 57 (0.00)  | 69 (0.48)  | 1.28 |
| 11-12 | Gp3 | g.chr15:28900654G>T  | RNA               | HERC2P9   |          | hect domain and RLD 2     | 17 (0.00)  | 63 (0.40)  | 1.06 |
| 11-12 | Gp3 | g.chr17:80400073C>T  | Missense Mutation | HEXDC     | p.T425I  | hexosaminidase (glycos    | 16 (0.00)  | 24 (0.75)  | 2.00 |
| 11-12 | Gp3 | g.chr7:75184835G>A   | Silent            | HIP1      | p.A616A  | huntingtin interacting pr | 20 (0.00)  | 18 (0.78)  | 2.07 |
| 11-12 | Gp3 | g.chr7:75185426C>A   | Silent            | HIP1      | p.R577R  | huntingtin interacting pr | 22 (0.00)  | 80 (0.95)  | 2.53 |
| 11-12 | Gp3 | g.chr6:26017621C>A   | Missense Mutation | HIST1H1A  | p.A114S  | histone cluster 1, H1a    | 84 (0.00)  | 65 (0.32)  | 0.86 |
| 11-12 | Gp3 | g.chr6:26217213G>C   | Missense Mutation | HIST1H2AE | p.R4P    | histone cluster 1, H2ae   | 45 (0.00)  | 163 (0.17) | 0.46 |
| 11-12 | Gp3 | g.chr10:71008379G>T  | Missense Mutation | HKDC1     | p.A489S  | hexokinase domain cont    | 16 (0.00)  | 23 (0.91)  | 2.43 |
| 11-12 | Gp3 | g.chr5:74650452T>C   | Missense Mutation | HMGCR     | p.L498S  | 3-hydroxy-3-methylglut    | 35 (0.03)  | 78 (0.90)  | 2.39 |
| 11-12 | Gp3 | g.chr12:54394058C>A  | Missense Mutation | HOXC9     | p.P29Q   | homeobox C9               | 32 (0.00)  | 159 (0.65) | 1.74 |
| 11-12 | Gp3 | g.chr10:103827250G>T | Silent            | HPS6      | p.L673L  | Hermansky-Pudlak sync     | 28 (0.00)  | 155 (0.19) | 0.52 |
| 11-12 | Gp3 | g.chr10:103827253G>A | Silent            | HPS6      | p.L674L  | Hermansky-Pudlak sync     | 28 (0.00)  | 114 (0.25) | 0.65 |
| 11-12 | Gp3 | g.chr1:152187686G>T  | Nonsense Mutation | HRNR      | p.S2140* | hornerin                  | 297 (0.00) | 58 (0.48)  | 1.29 |
| 11-12 | Gp3 | g.chr6:114379119C>G  | Missense Mutation | HS3ST5    | p.A115P  | heparan sulfate (glucosa  | 42 (0.00)  | 432 (0.49) | 1.31 |
| 11-12 | Gp3 | g.chr4:171525876C>G  | RNA               | HSP90AA6P |          | heat shock protein 90kD   | 34 (0.00)  | 73 (0.33)  | 0.88 |
| 11-12 | Gp3 | g.chr14:65008721G>T  | Missense Mutation | HSPA2     | p.G385V  | heat shock 70kDa protei   | 34 (0.00)  | 314 (0.23) | 0.62 |
| 11-12 | Gp3 | g.chr1:22150160G>T   | Silent            | HSPG2     | p.R4318R | heparan sulfate proteogl  | 27 (0.00)  | 272 (0.47) | 1.25 |
| 11-12 | Gp3 | g.chr1:22222764G>T   | Missense Mutation | HSPG2     | p.P35T   | heparan sulfate proteogl  | 112 (0.01) | 564 (0.16) | 0.44 |
| 11-12 | Gp3 | g.chr4:3234933C>A    | Missense Mutation | HTT       | p.T2770K | huntingtin                | 46 (0.00)  | 380 (0.43) | 1.14 |
| 11-12 | Gp3 | g.chr3:50355883G>T   | Silent            | HYAL2     | p.R367R  | hyaluronoglucosaminid     | 32 (0.00)  | 78 (0.73)  | 1.95 |
| 11-12 | Gp3 | g.chr1:206651593G>T  | Missense Mutation | IKBKE     | p.E301D  | inhibitor of kappa light  | 101 (0.00) | 22 (0.95)  | 2.55 |
| 11-12 | Gp3 | g.chr4:143252352T>A  | Intron            | INPP4B    |          | inositol polyphosphate-   | 177 (0.01) | 126 (0.98) | 2.62 |
| 11-12 | Gp3 | g.chr4:143416004C>A  | Intron            | INPP4B    |          | inositol polyphosphate-   | 61 (0.00)  | 26 (0.46)  | 1.23 |
| 11-12 | Gp3 | g.chr4:143569141C>A  | Intron            | INPP4B    |          | inositol polyphosphate-   | 143 (0.00) | 27 (0.44)  | 1.19 |
| 11-12 | Gp3 | g.chr4:143614473A>T  | Intron            | INPP4B    |          | inositol polyphosphate-   | 69 (0.00)  | 32 (0.53)  | 1.42 |
| 11-12 | Gp3 | g.chr4:143670011G>T  | Intron            | INPP4B    |          | inositol polyphosphate-   | 150 (0.00) | 68 (0.19)  | 0.51 |
| 11-12 | Gp3 | g.chr11:71946748G>A  | Missense Mutation | INPPL1    | p.G897R  | inositol polyphosphate    | 21 (0.00)  | 71 (0.34)  | 0.90 |
| 11-12 | Gp3 | g.chr11:62416891G>C  | Missense Mutation | INTS5     | p.P221A  | integrator complex subu   | 48 (0.00)  | 54 (0.35)  | 0.94 |
| 11-12 | Gp3 | g.chr7:128582192C>G  | Silent            | IRF5      | p.P19P   | interferon regulatory fac | 38 (0.00)  | 208 (0.15) | 0.41 |
| 11-12 | Gp3 | g.chr15:74467809G>T  | Nonsense Mutation | ISLR      | p.E204*  | immunoglobulin superfe    | 39 (0.00)  | 220 (0.43) | 1.14 |
| 11-12 | Gp3 | g.chr14:77942069G>A  | Missense Mutation | ISM2      | p.P529S  | isthmin 2                 | 17 (0.00)  | 90 (0.52)  | 1.39 |
| 11-12 | Gp3 | g.chr2:173344458G>T  | Missense Mutation | ITGA6     | p.S493I  | integrin, alpha 6         | 40 (0.00)  | 179 (0.55) | 1.47 |

|       |     |                      |                   |             |          |                           |            |            |      |
|-------|-----|----------------------|-------------------|-------------|----------|---------------------------|------------|------------|------|
| 11-12 | Gp3 | g.chr12:26553165C>A  | Nonsense Mutation | ITPR2       | p.E2476* | inositol 1,4,5-trisphosph | 143 (0.00) | 21 (0.48)  | 1.27 |
| 11-12 | Gp3 | g.chr2:24469137G>T   | Silent            | ITSN2       | p.L1146L | intersectin 2             | 23 (0.00)  | 171 (0.99) | 2.65 |
| 11-12 | Gp3 | g.chr15:42132825G>T  | Missense Mutation | JMJD7-PLA2C | p.Q293H  | JMJD7-PLA2G4B read        | 16 (0.00)  | 22 (0.68)  | 1.82 |
| 11-12 | Gp3 | g.chr9:711732G>A     | Silent            | KANK1       | p.R322R  | KN motif and ankyrin r    | 65 (0.00)  | 21 (0.71)  | 1.90 |
| 11-12 | Gp3 | g.chr22:24056662G>C  | RNA               | KB-1572G7.2 |          |                           | 19 (0.00)  | 93 (0.47)  | 1.26 |
| 11-12 | Gp3 | g.chr1:110768754G>T  | Silent            | KCNC4       | p.L591L  | potassium voltage-gated   | 23 (0.00)  | 81 (0.16)  | 0.43 |
| 11-12 | Gp3 | g.chr1:112524793A>G  | Missense Mutation | KCND3       | p.Y186H  | potassium voltage-gated   | 15 (0.00)  | 34 (0.15)  | 0.39 |
| 11-12 | Gp3 | g.chr12:49937754G>A  | Missense Mutation | KCNH3       | p.A294T  | potassium voltage-gated   | 19 (0.00)  | 119 (0.32) | 0.85 |
| 11-12 | Gp3 | g.chr17:61619678G>A  | Silent            | KCNH6       | p.L677L  | potassium voltage-gated   | 18 (0.00)  | 50 (0.90)  | 2.40 |
| 11-12 | Gp3 | g.chr2:155555376G>A  | Missense Mutation | KCNJ3       | p.G30D   | potassium inwardly-rect   | 48 (0.02)  | 156 (0.99) | 2.65 |
| 11-12 | Gp3 | g.chr16:67327724G>T  | Nonsense Mutation | KCTD19      | p.C647*  | potassium channel tetra   | 194 (0.00) | 46 (0.59)  | 0.73 |
| 11-12 | Gp3 | g.chr11:67018085G>A  | Missense Mutation | KDM2A       | p.E862K  | lysine (K)-specific dem   | 16 (0.00)  | 84 (0.88)  | 2.35 |
| 11-12 | Gp3 | g.chr12:416213C>T    | Missense Mutation | KDM5A       | p.V1325M | lysine (K)-specific dem   | 19 (0.00)  | 50 (0.98)  | 2.61 |
| 11-12 | Gp3 | g.chr6:24596754G>A   | Missense Mutation | KIAA0319    | p.H50Y   | KIAA0319                  | 19 (0.00)  | 12 (0.83)  | 2.22 |
| 11-12 | Gp3 | g.chr10:30316264T>C  | Missense Mutation | KIAA1462    | p.E938G  | KIAA1462                  | 26 (0.00)  | 13 (0.46)  | 1.23 |
| 11-12 | Gp3 | g.chr2:8873764G>T    | Missense Mutation | KIDINS220   | p.P1288Q | kinase D-interacting sub  | 40 (0.00)  | 299 (0.59) | 1.58 |
| 11-12 | Gp3 | g.chr1:245772749G>T  | Silent            | KIF26B      | p.L611L  | kinesin family member     | 44 (0.00)  | 95 (0.58)  | 1.54 |
| 11-12 | Gp3 | g.chr12:88912573A>G  | Silent            | KITLG       | p.F88F   | KIT ligand                | 35 (0.00)  | 53 (0.23)  | 0.60 |
| 11-12 | Gp3 | g.chr4:39449012C>G   | Missense Mutation | KLB         | p.A889G  | klotho beta               | 40 (0.00)  | 175 (0.59) | 1.57 |
| 11-12 | Gp3 | g.chr22:50986626C>T  | Nonsense Mutation | KLHDC7B     | p.Q11*   | kelch domain containin    | 18 (0.00)  | 34 (0.21)  | 0.55 |
| 11-12 | Gp3 | g.chr1:202888969A>T  | Nonsense Mutation | KLHL12      | p.L88*   | kelch-like family memb    | 46 (0.00)  | 50 (0.52)  | 1.39 |
| 11-12 | Gp3 | g.chr3:47385413C>A   | Silent            | KLHL18      | p.I569I  | kelch-like family memb    | 95 (0.00)  | 127 (0.30) | 0.80 |
| 11-12 | Gp3 | g.chr19:51410255G>T  | Missense Mutation | KLK4        | p.P234T  | kallikrein-related peptid | 77 (0.00)  | 25 (0.44)  | 1.17 |
| 11-12 | Gp3 | g.chr12:49427573G>C  | Missense Mutation | KMT2D       | p.H3639D | lysine (K)-specific meth  | 23 (0.00)  | 13 (0.85)  | 2.26 |
| 11-12 | Gp3 | g.chr12:123057808G>T | Missense Mutation | KNTC1       | p.E716D  | kinetochore associated    | 167 (0.00) | 160 (0.53) | 1.42 |
| 11-12 | Gp3 | g.chr1:32628856C>T   | Missense Mutation | KPNA6       | p.A311V  | karyopherin alpha 6 (im   | 35 (0.00)  | 105 (0.99) | 2.64 |
| 11-12 | Gp3 | g.chr17:39659672C>A  | Missense Mutation | KRT13       | p.R201L  | keratin 13                | 63 (0.00)  | 127 (0.98) | 1.42 |
| 11-12 | Gp3 | g.chr17:39778685G>T  | Silent            | KRT17       | p.T198T  | keratin 17                | 48 (0.02)  | 516 (0.53) | 0.78 |
| 11-12 | Gp3 | g.chr12:52841055G>T  | Silent            | KRT6B       | p.G538G  | keratin 6B                | 60 (0.00)  | 85 (0.34)  | 0.91 |
| 11-12 | Gp3 | g.chr17:39186168A>C  | Missense Mutation | KRTAP1-4    | p.S55A   | keratin associated protei | 28 (0.00)  | 17 (0.53)  | 0.77 |
| 11-12 | Gp3 | g.chr21:46047382C>G  | Silent            | KRTAP10-9   | p.A98A   | keratin associated protei | 72 (0.00)  | 77 (0.47)  | 1.51 |
| 11-12 | Gp3 | g.chr17:39296254C>T  | Silent            | KRTAP4-6    | p.P162P  | keratin associated protei | 38 (0.03)  | 185 (0.55) | 0.79 |
| 11-12 | Gp3 | g.chr17:39383012C>T  | Missense Mutation | KRTAP9-2    | p.P36S   | keratin associated protei | 50 (0.00)  | 296 (1.00) | 1.44 |
| 11-12 | Gp3 | g.chr12:6883778G>T   | Nonsense Mutation | LAG3        | p.G177*  | lymphocyte-activation g   | 16 (0.00)  | 37 (0.38)  | 1.01 |
| 11-12 | Gp3 | g.chr3:49168206G>T   | Missense Mutation | LAMB2       | p.P335T  | laminin, beta 2 (laminin  | 115 (0.00) | 308 (0.76) | 2.02 |



|       |     |                     |                   |         |          |                             |            |            |      |
|-------|-----|---------------------|-------------------|---------|----------|-----------------------------|------------|------------|------|
| 11-12 | Gp3 | g.chr1:209790888A>G | Missense Mutation | LAMB3   | p.M1032T | laminin, beta 3             | 40 (0.00)  | 52 (0.46)  | 1.23 |
| 11-12 | Gp3 | g.chr1:209791819G>A | Nonsense Mutation | LAMB3   | p.Q963*  | laminin, beta 3             | 21 (0.00)  | 102 (0.61) | 1.62 |
| 11-12 | Gp3 | g.chr9:133942431A>G | Missense Mutation | LAMC3   | p.Q811R  | laminin, gamma 3            | 16 (0.00)  | 149 (0.15) | 0.39 |
| 11-12 | Gp3 | g.chr9:130912522G>C | Missense Mutation | LCN2    | p.Q48H   | lipocalin 2                 | 32 (0.00)  | 43 (0.28)  | 0.74 |
| 11-12 | Gp3 | g.chr9:139639715G>T | Missense Mutation | LCN6    | p.L97I   | lipocalin 6                 | 27 (0.00)  | 108 (0.29) | 0.77 |
| 11-12 | Gp3 | g.chr9:139639718C>A | Nonsense Mutation | LCN6    | p.E96*   | lipocalin 6                 | 25 (0.00)  | 112 (0.16) | 0.43 |
| 11-12 | Gp3 | g.chr12:6940013C>G  | RNA               | LEPREL2 |          | leprecan-like 2             | 44 (0.00)  | 36 (0.83)  | 2.22 |
| 11-12 | Gp3 | g.chr12:6940051C>A  | RNA               | LEPREL2 |          | leprecan-like 2             | 46 (0.00)  | 26 (0.77)  | 2.05 |
| 11-12 | Gp3 | g.chr15:77907646G>T | Nonsense Mutation | LINGO1  | p.C201*  | leucine rich repeat and I37 | 15 (0.00)  | 290 (0.68) | 1.80 |
| 11-12 | Gp3 | g.chr8:23185916T>C  | Missense Mutation | LOXL2   | p.T377A  | lysyl oxidase-like 2        | 30 (0.00)  | 181 (0.43) | 1.13 |
| 11-12 | Gp3 | g.chr18:2921619T>C  | Missense Mutation | LPIN2   | p.K785R  | lipin 2                     | 56 (0.00)  | 120 (0.87) | 2.31 |
| 11-12 | Gp3 | g.chr12:57574519G>A | Missense Mutation | LRP1    | p.G1819D | low density lipoprotein 115 | 15 (0.00)  | 56 (0.46)  | 1.24 |
| 11-12 | Gp3 | g.chr12:57593066G>T | Nonsense Mutation | LRP1    | p.E3250* | low density lipoprotein 139 | 19 (0.00)  | 73 (0.33)  | 0.88 |
| 11-12 | Gp3 | g.chr2:170026315G>T | Nonsense Mutation | LRP2    | p.C3798* | low density lipoprotein 148 | 18 (0.02)  | 293 (0.27) | 0.73 |
| 11-12 | Gp3 | g.chr11:68170999C>A | Missense Mutation | LRP5    | p.L545I  | low density lipoprotein 116 | 16 (0.00)  | 47 (0.19)  | 0.51 |
| 11-12 | Gp3 | g.chr8:145745425C>A | Missense Mutation | LRRC14  | p.Q106K  | leucine rich repeat conta27 | 27 (0.00)  | 168 (0.14) | 0.38 |
| 11-12 | Gp3 | g.chr8:145746650C>A | Missense Mutation | LRRC14  | p.R424S  | leucine rich repeat conta20 | 20 (0.00)  | 137 (0.24) | 0.64 |
| 11-12 | Gp3 | g.chr20:6022532G>T  | Silent            | LRRN4   | p.T453T  | leucine rich repeat neurc29 | 29 (0.00)  | 59 (0.29)  | 0.77 |
| 11-12 | Gp3 | g.chr3:115560742C>A | Missense Mutation | LSAMP   | p.C290F  | limbic system-associatedc29 | 29 (0.00)  | 68 (0.34)  | 0.90 |
| 11-12 | Gp3 | g.chr22:21342384G>T | Missense Mutation | LZTR1   | p.W162C  | leucine-zipper-like trans20 | 20 (0.00)  | 25 (0.40)  | 1.07 |
| 11-12 | Gp3 | g.chr7:77721501G>T  | Intron            | MAGI2   |          | membrane associated gu73    | 73 (0.00)  | 89 (0.63)  | 1.68 |
| 11-12 | Gp3 | g.chr7:77747375C>A  | Intron            | MAGI2   |          | membrane associated gu46    | 46 (0.00)  | 12 (0.67)  | 1.78 |
| 11-12 | Gp3 | g.chr7:77791521G>A  | Intron            | MAGI2   |          | membrane associated gu248   | 248 (0.00) | 18 (0.89)  | 2.37 |
| 11-12 | Gp3 | g.chr7:77829803A>T  | Intron            | MAGI2   |          | membrane associated gu81    | 81 (0.01)  | 128 (0.53) | 1.42 |
| 11-12 | Gp3 | g.chr7:77944766C>A  | Intron            | MAGI2   |          | membrane associated gu81    | 81 (0.00)  | 23 (0.57)  | 1.51 |
| 11-12 | Gp3 | g.chr7:77982338A>T  | Intron            | MAGI2   |          | membrane associated gu56    | 56 (0.00)  | 20 (0.65)  | 1.73 |
| 11-12 | Gp3 | g.chr7:77995133T>C  | Intron            | MAGI2   |          | membrane associated gu138   | 138 (0.00) | 111 (0.17) | 0.46 |
| 11-12 | Gp3 | g.chr7:78347790G>T  | Intron            | MAGI2   |          | membrane associated gu20    | 20 (0.00)  | 115 (0.99) | 2.64 |
| 11-12 | Gp3 | g.chr7:78360229T>A  | Intron            | MAGI2   |          | membrane associated gu82    | 82 (0.00)  | 150 (0.83) | 2.20 |
| 11-12 | Gp3 | g.chr7:78626679G>A  | Intron            | MAGI2   |          | membrane associated gu34    | 34 (0.03)  | 22 (0.95)  | 2.55 |
| 11-12 | Gp3 | g.chr7:78741913C>A  | Intron            | MAGI2   |          | membrane associated gu49    | 49 (0.00)  | 177 (0.52) | 1.39 |
| 11-12 | Gp3 | g.chr15:91453393C>T | Missense Mutation | MAN2A2  | p.P483L  | mannosidase, alpha, cla44   | 44 (0.00)  | 267 (0.15) | 0.40 |
| 11-12 | Gp3 | g.chr15:91453416G>C | Missense Mutation | MAN2A2  | p.G491R  | mannosidase, alpha, cla49   | 49 (0.00)  | 340 (0.79) | 2.09 |
| 11-12 | Gp3 | g.chr2:102456343C>G | Missense Mutation | MAP4K4  | p.S279C  | mitogen-activated protei136 | 136 (0.00) | 17 (0.71)  | 1.88 |
| 11-12 | Gp3 | g.chr15:42116159C>A | Missense Mutation | MAPKBP1 | p.S1371R | mitogen-activated protei36  | 36 (0.00)  | 218 (0.31) | 0.82 |

|       |     |                      |                   |        |           |                           |            |            |      |
|-------|-----|----------------------|-------------------|--------|-----------|---------------------------|------------|------------|------|
| 11-12 | Gp3 | g.chr4:164621966T>C  | Splice Site       | MARCH1 | p.K54R    | membrane-associated ri    | 32 (0.00)  | 18 (0.28)  | 0.74 |
| 11-12 | Gp3 | g.chr5:66460326C>A   | Silent            | MAST4  | p.G1773G  | microtubule associated ε  | 25 (0.00)  | 125 (0.32) | 0.85 |
| 11-12 | Gp3 | g.chr5:112399697A>T  | Missense Mutation | MCC    | p.S733T   | mutated in colorectal ca  | 33 (0.00)  | 33 (0.21)  | 0.57 |
| 11-12 | Gp3 | g.chr21:47686052G>C  | Missense Mutation | MCM3AP | p.L940V   | minichromosome maint      | 291 (0.00) | 98 (0.89)  | 2.87 |
| 11-12 | Gp3 | g.chr22:35804428A>G  | Silent            | MCM5   | p.P208P   | minichromosome maint      | 37 (0.00)  | 13 (0.38)  | 1.03 |
| 11-12 | Gp3 | g.chr12:27179376C>A  | Silent            | MED21  | p.A22A    | mediator complex subur    | 51 (0.00)  | 100 (0.49) | 1.31 |
| 11-12 | Gp3 | g.chr15:100252658C>A | Silent            | MEF2A  | p.I392I   | myocyte enhancer facto    | 70 (0.00)  | 57 (0.18)  | 0.47 |
| 11-12 | Gp3 | g.chr5:88056912C>A   | Nonsense Mutation | MEF2C  | p.E97*    | myocyte enhancer facto    | 30 (0.00)  | 14 (0.79)  | 2.10 |
| 11-12 | Gp3 | g.chr15:66250057C>A  | Missense Mutation | MEGF11 | p.C372F   | multiple EGF-like-domε    | 18 (0.00)  | 16 (0.44)  | 1.17 |
| 11-12 | Gp3 | g.chr11:12237784T>C  | Missense Mutation | MICAL2 | p.I289T   | microtubule associated r  | 62 (0.02)  | 340 (0.46) | 1.23 |
| 11-12 | Gp3 | g.chr22:50523252C>G  | Missense Mutation | MLC1   | p.S27T    | megalencephalic leukoe    | 21 (0.00)  | 66 (0.20)  | 0.53 |
| 11-12 | Gp3 | g.chr8:89130934A>T   | Missense Mutation | MMP16  | p.I289K   | matrix metallopeptidase   | 36 (0.00)  | 14 (0.43)  | 1.14 |
| 11-12 | Gp3 | g.chr16:55527190T>A  | Missense Mutation | MMP2   | p.F410Y   | matrix metallopeptidase   | 63 (0.00)  | 12 (0.67)  | 0.83 |
| 11-12 | Gp3 | g.chr17:34964848C>A  | Silent            | MRM1   | p.G158G   | mitochondrial rRNA me     | 19 (0.00)  | 108 (0.25) | 0.67 |
| 11-12 | Gp3 | g.chr2:48018181T>C   | Missense Mutation | MSH6   | p.S126P   | mutS homolog 6            | 49 (0.02)  | 18 (0.44)  | 1.19 |
| 11-12 | Gp3 | g.chr5:174156462G>T  | Missense Mutation | MSX2   | p.S227I   | msh homeobox 2            | 46 (0.00)  | 125 (0.96) | 2.56 |
| 11-12 | Gp3 | g.chr7:100647878C>T  | Silent            | MUC12  | p.G4821G  | mucin 12, cell surface a: | 202 (0.00) | 63 (0.97)  | 2.58 |
| 11-12 | Gp3 | g.chr19:9047283G>A   | Missense Mutation | MUC16  | p.L11450F | mucin 16, cell surface a: | 104 (0.00) | 222 (0.99) | 2.63 |
| 11-12 | Gp3 | g.chr19:9057588T>C   | Missense Mutation | MUC16  | p.Q9953R  | mucin 16, cell surface a: | 40 (0.00)  | 78 (0.14)  | 0.38 |
| 11-12 | Gp3 | g.chr19:9068830C>A   | Missense Mutation | MUC16  | p.D6206Y  | mucin 16, cell surface a: | 56 (0.00)  | 20 (0.25)  | 0.67 |
| 11-12 | Gp3 | g.chr11:1092947C>A   | Missense Mutation | MUC2   | p.T1589N  | mucin 2, oligomeric mu    | 21 (0.00)  | 125 (0.19) | 0.51 |
| 11-12 | Gp3 | g.chr7:100552220G>T  | Missense Mutation | MUC3A  | p.G324V   | mucin 3A, cell surface a  | 578 (0.00) | 265 (0.98) | 2.62 |
| 11-12 | Gp3 | g.chr11:1268151G>C   | Silent            | MUC5B  | p.V3347V  | mucin 5B, oligomeric m    | 39 (0.00)  | 267 (0.34) | 0.90 |
| 11-12 | Gp3 | g.chr11:47369029C>A  | Splice Site       | MYBPC3 | p.D285Y   | myosin binding protein    | 60 (0.00)  | 17 (0.53)  | 1.41 |
| 11-12 | Gp3 | g.chr17:10404607G>T  | Silent            | MYH1   | p.T1186T  | myosin, heavy chain 1, ε  | 79 (0.00)  | 77 (0.97)  | 2.60 |
| 11-12 | Gp3 | g.chr17:8381700G>A   | Nonsense Mutation | MYH10  | p.Q1857*  | myosin, heavy chain 10,   | 35 (0.00)  | 71 (0.55)  | 1.46 |
| 11-12 | Gp3 | g.chr14:23885420C>A  | Missense Mutation | MYH7   | p.E1582D  | myosin, heavy chain 7, ε  | 28 (0.00)  | 32 (0.38)  | 1.00 |
| 11-12 | Gp3 | g.chr20:30408009C>T  | Missense Mutation | MYLK2  | p.P45S    | myosin light chain kinas  | 65 (0.00)  | 298 (0.45) | 1.20 |
| 11-12 | Gp3 | g.chr6:2749389G>A    | Missense Mutation | MYLK4  | p.S47L    | myosin light chain kinas  | 104 (0.00) | 35 (0.94)  | 2.51 |
| 11-12 | Gp3 | g.chr11:76908590G>T  | Missense Mutation | MYO7A  | p.R1463L  | myosin VIIA               | 111 (0.00) | 198 (0.34) | 0.90 |
| 11-12 | Gp3 | g.chr15:72190967G>A  | Missense Mutation | MYO9A  | p.R1293C  | myosin IXA                | 34 (0.00)  | 21 (0.52)  | 1.40 |
| 11-12 | Gp3 | g.chr8:2005567C>A    | Missense Mutation | MYOM2  | p.A122D   | myomesin 2                | 23 (0.00)  | 55 (0.44)  | 1.16 |
| 11-12 | Gp3 | g.chr20:62843446G>A  | Missense Mutation | MYT1   | p.C491Y   | myelin transcription fac  | 156 (0.00) | 161 (0.51) | 1.36 |
| 11-12 | Gp3 | g.chr12:112492219G>T | Missense Mutation | NAA25  | p.A534D   | N(alpha)-acetyltransfera  | 30 (0.00)  | 81 (0.47)  | 1.25 |
| 11-12 | Gp3 | g.chr9:130825933A>G  | Missense Mutation | NAIF1  | p.L253P   | nuclear apoptosis induci  | 35 (0.00)  | 65 (0.17)  | 0.45 |

|       |     |                      |                   |         |          |                                     |            |      |
|-------|-----|----------------------|-------------------|---------|----------|-------------------------------------|------------|------|
| 11-12 | Gp3 | g.chr8:144657620C>A  | Missense Mutation | NAPRT1  | p.A422S  | 16 (0.00)                           | 47 (0.17)  | 0.45 |
| 11-12 | Gp3 | g.chr3:47043278C>A   | Silent            | NBEAL2  | p.R1582R | neurobeachin-like 2 39 (0.00)       | 13 (0.85)  | 2.26 |
| 11-12 | Gp3 | g.chr1:16892290C>G   | Missense Mutation | NBPF1   | p.E968Q  | neuroblastoma breakpoi 142 (0.00)   | 84 (0.60)  | 1.59 |
| 11-12 | Gp3 | g.chr17:41343599G>T  | Splice Site       | NBR1    |          | neighbor of BRCA1 gen 16 (0.00)     | 46 (0.61)  | 0.88 |
| 11-12 | Gp3 | g.chr2:97019938A>T   | Silent            | NCAPH   | p.V329V  | non-SMC condensin I c 58 (0.00)     | 73 (0.42)  | 1.13 |
| 11-12 | Gp3 | g.chr12:124816977C>A | Missense Mutation | NCOR2   | p.Q2264H | nuclear receptor corepre 65 (0.00)  | 364 (0.27) | 0.72 |
| 11-12 | Gp3 | g.chr8:11643527C>A   | Silent            | NEIL2   | p.L248L  | nei endonuclease VIII-li 111 (0.01) | 535 (0.85) | 2.27 |
| 11-12 | Gp3 | g.chr9:127089633C>T  | Silent            | NEK6    | p.N177N  | NIMA-related kinase 6 103 (0.00)    | 159 (0.19) | 0.52 |
| 11-12 | Gp3 | g.chr17:7225187A>G   | Silent            | NEURL4  | p.F956F  | neuralized E3 ubiquitin 49 (0.00)   | 124 (0.20) | 0.54 |
| 11-12 | Gp3 | g.chr17:29684011C>G  | Missense Mutation | NF1     | p.P2591R | neurofibromin 1 102 (0.00)          | 35 (0.20)  | 0.53 |
| 11-12 | Gp3 | g.chr1:41236426C>G   | Missense Mutation | NFYC    | p.L311V  | nuclear transcription fac 38 (0.00) | 140 (0.59) | 1.56 |
| 11-12 | Gp3 | g.chr6:18122238C>T   | Silent            | NHLRC1  | p.V200V  | NHL repeat containing 161 (0.00)    | 13 (0.38)  | 1.03 |
| 11-12 | Gp3 | g.chr6:138751810G>T  | Silent            | NHSL1   | p.L1228L | NHS-like 1 15 (0.00)                | 352 (0.16) | 0.42 |
| 11-12 | Gp3 | g.chr17:26370174C>G  | Missense Mutation | NLK     | p.P92R   | nemo-like kinase 31 (0.00)          | 49 (0.59)  | 1.58 |
| 11-12 | Gp3 | g.chr5:43650657T>C   | Missense Mutation | NNT     | p.L562P  | nicotinamide nucleotide 84 (0.01)   | 201 (0.94) | 2.51 |
| 11-12 | Gp3 | g.chr9:33466984G>T   | Splice Site       | NOL6    | p.H626N  | nucleolar protein 6 (RN.58 (0.02)   | 116 (0.81) | 2.16 |
| 11-12 | Gp3 | g.chr7:150707327C>A  | Silent            | NOS3    | p.T879T  | nitric oxide synthase 3 ( 16 (0.00) | 148 (0.28) | 0.74 |
| 11-12 | Gp3 | g.chr19:15300177C>T  | Missense Mutation | NOTCH3  | p.D367N  | notch 3 17 (0.00)                   | 137 (0.20) | 0.55 |
| 11-12 | Gp3 | g.chr7:44578603T>A   | Missense Mutation | NPC1L1  | p.I465F  | NPC1-like 1 53 (0.00)               | 97 (0.84)  | 2.23 |
| 11-12 | Gp3 | g.chr16:29394468C>T  | Silent            | NPIPB11 | p.R595R  | nuclear pore complex in 348 (0.00)  | 359 (0.88) | 2.35 |
| 11-12 | Gp3 | g.chr1:153660686C>T  | Silent            | NPR1    | p.R802R  | natriuretic peptide recep 21 (0.00) | 54 (0.30)  | 0.79 |
| 11-12 | Gp3 | g.chr11:47283157C>G  | Missense Mutation | NR1H3   | p.H256Q  | nuclear receptor subfam 25 (0.00)   | 331 (0.19) | 0.51 |
| 11-12 | Gp3 | g.chr2:27664633C>T   | Missense Mutation | NRBP1   | p.A521V  | nuclear receptor binding 214 (0.00) | 69 (0.96)  | 2.55 |
| 11-12 | Gp3 | g.chr16:67919889C>T  | Missense Mutation | NRN1L   | p.T2I    | neuritin 1-like 51 (0.00)           | 31 (0.48)  | 0.60 |
| 11-12 | Gp3 | g.chr8:59514685G>T   | Missense Mutation | NSMAF   | p.P353T  | neutral sphingomyelinas 73 (0.00)   | 468 (0.18) | 0.48 |
| 11-12 | Gp3 | g.chr9:87570412T>C   | Missense Mutation | NTRK2   | p.Y702H  | neurotrophic tyrosine ki 19 (0.00)  | 145 (0.68) | 1.80 |
| 11-12 | Gp3 | g.chr11:71724571G>A  | Silent            | NUMA1   | p.G1326G | nuclear mitotic apparatus 20 (0.00) | 45 (0.62)  | 1.66 |
| 11-12 | Gp3 | g.chr3:13373839G>A   | Nonsense Mutation | NUP210  | p.Q1297* | nucleoporin 210kDa 61 (0.02)        | 325 (1.00) | 2.66 |
| 11-12 | Gp3 | g.chr3:13429937C>A   | Nonsense Mutation | NUP210  | p.E184*  | nucleoporin 210kDa 36 (0.00)        | 17 (0.59)  | 1.57 |
| 11-12 | Gp3 | g.chr19:50411977C>T  | Missense Mutation | NUP62   | p.R363H  | nucleoporin 62kDa 47 (0.00)         | 48 (0.15)  | 0.39 |
| 11-12 | Gp3 | g.chr11:3712695C>T   | Missense Mutation | NUP98   | p.A1446T | nucleoporin 98kDa 22 (0.00)         | 18 (0.44)  | 1.19 |
| 11-12 | Gp3 | g.chr19:17571412C>T  | Silent            | NXNL1   | p.L89L   | nucleoredoxin-like 1 27 (0.00)      | 248 (0.31) | 0.84 |
| 11-12 | Gp3 | g.chr2:226446903G>A  | Missense Mutation | NYAP2   | p.R257K  | neuronal tyrosine-phosp 68 (0.00)   | 207 (0.27) | 0.72 |
| 11-12 | Gp3 | g.chr1:228407190C>A  | Missense Mutation | OBSCN   | p.A940D  | obscurin, cytoskeletal c 19 (0.00)  | 189 (0.74) | 1.96 |
| 11-12 | Gp3 | g.chr1:228451857G>T  | Missense Mutation | OBSCN   | p.R1726S | obscurin, cytoskeletal c 25 (0.00)  | 519 (0.65) | 1.72 |

|       |     |                      |                   |          |          |                           |            |            |      |
|-------|-----|----------------------|-------------------|----------|----------|---------------------------|------------|------------|------|
| 11-12 | Gp3 | g.chr1:228475510A>G  | Silent            | OBSCN    | p.G3649G | obscurin, cytoskeletal c  | 32 (0.00)  | 205 (0.24) | 0.65 |
| 11-12 | Gp3 | g.chr1:228475848G>A  | Missense Mutation | OBSCN    | p.A3729T | obscurin, cytoskeletal c  | 81 (0.00)  | 149 (0.84) | 2.24 |
| 11-12 | Gp3 | g.chr1:228509803G>T  | Missense Mutation | OBSCN    | p.E6044D | obscurin, cytoskeletal c  | 29 (0.00)  | 146 (0.21) | 0.57 |
| 11-12 | Gp3 | g.chr6:154360871T>C  | Silent            | OPRM1    | p.S64S   | opioid receptor, mu 1     | 16 (0.00)  | 12 (0.50)  | 1.33 |
| 11-12 | Gp3 | g.chr11:4928784T>C   | Missense Mutation | OR51A7   | p.F62S   | olfactory receptor, famil | 88 (0.00)  | 95 (0.83)  | 2.22 |
| 11-12 | Gp3 | g.chr11:4842919G>T   | Nonsense Mutation | OR51F2   | p.E102*  | olfactory receptor, famil | 23 (0.00)  | 18 (0.39)  | 1.04 |
| 11-12 | Gp3 | g.chr11:4842920A>T   | Missense Mutation | OR51F2   | p.E102V  | olfactory receptor, famil | 23 (0.00)  | 18 (0.39)  | 1.04 |
| 11-12 | Gp3 | g.chr11:4843081G>A   | Missense Mutation | OR51F2   | p.A156T  | olfactory receptor, famil | 25 (0.00)  | 25 (0.80)  | 2.13 |
| 11-12 | Gp3 | g.chr11:5475105C>A   | Silent            | OR51I2   | p.P129P  | olfactory receptor, famil | 68 (0.00)  | 49 (0.14)  | 0.38 |
| 11-12 | Gp3 | g.chr8:99961446C>T   | Missense Mutation | OSR2     | p.P89L   | odd-skipped related tran  | 15 (0.00)  | 182 (0.41) | 1.08 |
| 11-12 | Gp3 | g.chr17:72927157A>G  | Missense Mutation | OTOP2    | p.E476G  | otopetrin 2               | 58 (0.00)  | 400 (0.20) | 0.53 |
| 11-12 | Gp3 | g.chr17:72927170C>A  | Silent            | OTOP2    | p.I480I  | otopetrin 2               | 62 (0.00)  | 389 (0.36) | 0.95 |
| 11-12 | Gp3 | g.chr11:65998314G>T  | Missense Mutation | PACS1    | p.S510I  | phosphofurin acidic clus  | 55 (0.02)  | 551 (0.15) | 0.41 |
| 11-12 | Gp3 | g.chr12:103271329C>A | Splice Site       | PAH      |          | phenylalanine hydroxyl    | 43 (0.00)  | 132 (0.79) | 2.10 |
| 11-12 | Gp3 | g.chr1:2450598A>G    | Missense Mutation | PANK4    | p.I340T  | pantothenate kinase 4     | 24 (0.00)  | 145 (0.19) | 0.50 |
| 11-12 | Gp3 | g.chr13:58209223C>G  | Missense Mutation | PCDH17   | p.A848G  | protocadherin 17          | 55 (0.00)  | 32 (0.97)  | 2.58 |
| 11-12 | Gp3 | g.chr5:140214350G>A  | Missense Mutation | PCDHA7   | p.D128N  | protocadherin alpha 7     | 60 (0.00)  | 43 (0.84)  | 2.23 |
| 11-12 | Gp3 | g.chr5:140811696A>T  | Missense Mutation | PCDHGA12 | p.Y457F  | protocadherin gamma st    | 62 (0.02)  | 80 (0.16)  | 0.43 |
| 11-12 | Gp3 | g.chr5:140743983G>T  | Missense Mutation | PCDHGA5  | p.G29V   | protocadherin gamma st    | 21 (0.00)  | 71 (0.94)  | 2.52 |
| 11-12 | Gp3 | g.chr5:140763354G>A  | Silent            | PCDHGA7  | p.S296S  | protocadherin gamma st    | 70 (0.00)  | 52 (0.98)  | 2.62 |
| 11-12 | Gp3 | g.chr21:47832787G>T  | Missense Mutation | PCNT     | p.A2011S | pericentrin               | 81 (0.00)  | 29 (0.90)  | 2.90 |
| 11-12 | Gp3 | g.chr1:233314895C>G  | Silent            | PCNXL2   | p.P1031P | pecanex-like 2 (Drosopl   | 113 (0.00) | 11 (0.91)  | 2.42 |
| 11-12 | Gp3 | g.chr17:53848468A>G  | Splice Site       | PCTP     | p.E87E   | phosphatidylcholine tra   | 59 (0.00)  | 195 (0.48) | 1.29 |
| 11-12 | Gp3 | g.chr19:10574533G>A  | Missense Mutation | PDE4A    | p.R603H  | phosphodiesterase 4A, c   | 19 (0.00)  | 90 (0.14)  | 0.39 |
| 11-12 | Gp3 | g.chr19:10574588C>A  | Silent            | PDE4A    | p.R621R  | phosphodiesterase 4A, c   | 25 (0.00)  | 127 (0.19) | 0.50 |
| 11-12 | Gp3 | g.chr5:52097364A>G   | Missense Mutation | PELO     | p.K283R  | pelota homolog (Drosop    | 46 (0.00)  | 74 (0.16)  | 0.43 |
| 11-12 | Gp3 | g.chr7:11030403G>A   | Missense Mutation | PHF14    | p.C325Y  | PHD finger protein 14     | 71 (0.01)  | 288 (0.97) | 2.59 |
| 11-12 | Gp3 | g.chr9:96418818T>G   | Missense Mutation | PHF2     | p.F363C  | PHD finger protein 2      | 51 (0.00)  | 144 (0.19) | 0.50 |
| 11-12 | Gp3 | g.chr18:60415529G>A  | Intron            | PHLPP1   |          | PH domain and leucine     | 119 (0.00) | 13 (0.92)  | 2.46 |
| 11-12 | Gp3 | g.chr18:60570347C>A  | Silent            | PHLPP1   | p.V865V  | PH domain and leucine     | 130 (0.01) | 144 (0.47) | 1.26 |
| 11-12 | Gp3 | g.chr18:60586604T>C  | Intron            | PHLPP1   |          | PH domain and leucine     | 65 (0.00)  | 17 (0.29)  | 0.78 |
| 11-12 | Gp3 | g.chr18:60631671T>A  | Intron            | PHLPP1   |          | PH domain and leucine     | 73 (0.00)  | 366 (0.20) | 0.53 |
| 11-12 | Gp3 | g.chr18:60642763C>T  | Nonsense Mutation | PHLPP1   | p.R1297* | PH domain and leucine     | 115 (0.00) | 128 (0.77) | 2.57 |
| 11-12 | Gp3 | g.chr16:71710143T>C  | Intron            | PHLPP2   |          | PH domain and leucine     | 64 (0.00)  | 13 (0.85)  | 1.05 |
| 11-12 | Gp3 | g.chr22:38471041G>A  | Missense Mutation | PICK1    | p.E384K  | protein interacting with  | 20 (0.00)  | 121 (0.30) | 0.79 |

|       |     |                      |                   |         |          |                                                         |            |      |
|-------|-----|----------------------|-------------------|---------|----------|---------------------------------------------------------|------------|------|
| 11-12 | Gp3 | g.chr7:99957139C>T   | Silent            | PILRB   | p.L212L  | paired immunoglobulin-like 22 (0.00)                    | 121 (0.88) | 2.36 |
| 11-12 | Gp3 | g.chr8:42037897C>A   | Splice Site       | PLAT    |          | plasminogen activator, tissue (0.00)                    | 178 (0.51) | 1.36 |
| 11-12 | Gp3 | g.chr8:145001465G>A  | Silent            | PLEC    | p.V1402V | plectin 35 (0.00)                                       | 244 (0.37) | 0.98 |
| 11-12 | Gp3 | g.chr8:145006605C>A  | Missense Mutation | PLEC    | p.R784L  | plectin 24 (0.00)                                       | 108 (0.68) | 1.80 |
| 11-12 | Gp3 | g.chr1:204197881T>A  | Missense Mutation | PLEKHA6 | p.I974F  | pleckstrin homology domain 43 (0.00)                    | 107 (0.28) | 0.75 |
| 11-12 | Gp3 | g.chr1:204198085C>T  | Missense Mutation | PLEKHA6 | p.D931N  | pleckstrin homology domain 50 (0.00)                    | 226 (0.49) | 1.31 |
| 11-12 | Gp3 | g.chr19:39911440G>C  | Silent            | PLEKHG2 | p.G449G  | pleckstrin homology domain 74 (0.00)                    | 231 (0.39) | 1.03 |
| 11-12 | Gp3 | g.chr19:4510914T>C   | Missense Mutation | PLIN4   | p.K1006E | perilipin 4 27 (0.00)                                   | 196 (0.14) | 0.38 |
| 11-12 | Gp3 | g.chr8:28196921G>T   | Missense Mutation | PNOC    | p.S164I  | prepronociceptin 46 (0.00)                              | 326 (0.33) | 0.88 |
| 11-12 | Gp3 | g.chr6:43487140G>T   | Missense Mutation | POLR1C  | p.A71S   | polymerase (RNA) I pol 116 (0.00)                       | 47 (0.17)  | 0.45 |
| 11-12 | Gp3 | g.chr17:7415869G>C   | Missense Mutation | POLR2A  | p.Q1522H | polymerase (RNA) II (E28) (0.00)                        | 17 (0.94)  | 2.51 |
| 11-12 | Gp3 | g.chr10:79745674C>T  | Missense Mutation | POLR3A  | p.D1020N | polymerase (RNA) III (I24) (0.00)                       | 49 (0.86)  | 2.29 |
| 11-12 | Gp3 | g.chr9:4662975T>C    | Silent            | PPAPDC2 | p.F200F  | phosphatidic acid phosphatase 29 (0.00)                 | 104 (0.33) | 0.87 |
| 11-12 | Gp3 | g.chr16:4933560G>T   | Nonsense Mutation | PPL     | p.S1699* | periplakin 19 (0.00)                                    | 55 (0.96)  | 2.57 |
| 11-12 | Gp3 | g.chr16:4934610C>T   | Missense Mutation | PPL     | p.R1349K | periplakin 136 (0.01)                                   | 145 (0.19) | 0.51 |
| 11-12 | Gp3 | g.chr16:4950973C>A   | Missense Mutation | PPL     | p.G186W  | periplakin 24 (0.00)                                    | 259 (0.17) | 0.45 |
| 11-12 | Gp3 | g.chr1:13001294C>A   | Missense Mutation | PRAMEF6 | p.R130M  | PRAME family member 219 (0.00)                          | 6 (0.83)   | 2.22 |
| 11-12 | Gp3 | g.chr11:82550332T>A  | Missense Mutation | PRCP    | p.S353C  | prolylcarboxypeptidase 52 (0.00)                        | 274 (0.93) | 2.48 |
| 11-12 | Gp3 | g.chr9:133543580C>A  | Silent            | PRDM12  | p.I150I  | PR domain containing 130 (0.00)                         | 27 (0.37)  | 0.99 |
| 11-12 | Gp3 | g.chr20:47269999T>C  | Missense Mutation | PREX1   | p.Q749R  | phosphatidylinositol-3-OH kinase 439 (0.00)             | 26 (0.42)  | 1.13 |
| 11-12 | Gp3 | g.chr19:54626919C>A  | Silent            | PRPF31  | p.V169V  | pre-mRNA processing factor 36 (0.00)                    | 163 (0.47) | 1.26 |
| 11-12 | Gp3 | g.chr17:1582626C>T   | Silent            | PRPF8   | p.L456L  | pre-mRNA processing factor 34 (0.00)                    | 65 (0.40)  | 1.07 |
| 11-12 | Gp3 | g.chr19:42814014G>T  | Missense Mutation | PRR19   | p.G93V   | proline rich 19 15 (0.00)                               | 112 (0.28) | 0.74 |
| 11-12 | Gp3 | g.chr9:134334707G>T  | Missense Mutation | PRRC2B  | p.R456S  | proline-rich coiled-coil domain 28 (0.00)               | 123 (0.42) | 1.13 |
| 11-12 | Gp3 | g.chr1:171544240T>A  | Missense Mutation | PRRC2C  | p.S2308T | proline-rich coiled-coil domain 29 (0.00)               | 32 (0.22)  | 0.58 |
| 11-12 | Gp3 | g.chr16:31151704G>A  | Nonsense Mutation | PRSS36  | p.Q734*  | protease, serine, 36 44 (0.00)                          | 256 (0.30) | 0.81 |
| 11-12 | Gp3 | g.chr7:77246964G>T   | Intron            | PTPN12  |          | protein tyrosine phosphatase 82 (0.00)                  | 59 (0.71)  | 1.90 |
| 11-12 | Gp3 | g.chr7:77255250A>G   | Intron            | PTPN12  |          | protein tyrosine phosphatase 79 (0.00)                  | 285 (0.80) | 2.13 |
| 11-12 | Gp3 | g.chr4:87610313G>T   | Missense Mutation | PTPN13  | p.L172F  | protein tyrosine phosphatase 63 (0.00)                  | 15 (0.40)  | 1.07 |
| 11-12 | Gp3 | g.chr1:214557856C>G  | Missense Mutation | PTPN14  | p.V448L  | protein tyrosine phosphatase 41 (0.00)                  | 347 (0.24) | 0.64 |
| 11-12 | Gp3 | g.chr12:120650242C>T | Missense Mutation | PXN     | p.A549T  | paxillin 34 (0.03)                                      | 70 (0.23)  | 0.61 |
| 11-12 | Gp3 | g.chr17:17697208C>A  | Missense Mutation | RAI1    | p.Q316K  | retinoic acid induced 1 97 (0.00)                       | 467 (0.57) | 1.52 |
| 11-12 | Gp3 | g.chr9:135985057G>T  | Silent            | RALGDS  | p.L180L  | ras guanine nucleotide dissociation inhibitor 28 (0.00) | 201 (0.90) | 2.40 |
| 11-12 | Gp3 | g.chr6:13622653T>C   | Missense Mutation | RANBP9  | p.M711V  | RAN binding protein 9 39 (0.00)                         | 280 (0.29) | 0.78 |
| 11-12 | Gp3 | g.chr4:160274033C>T  | Silent            | RAPGEF2 | p.T1193T | Rap guanine nucleotide dissociation inhibitor 28 (0.00) | 101 (0.99) | 2.64 |

|       |     |                      |                   |               |          |                                  |            |            |      |
|-------|-----|----------------------|-------------------|---------------|----------|----------------------------------|------------|------------|------|
| 11-12 | Gp3 | g.chr20:34240983C>T  | Missense Mutation | RBM12         | p.M754I  | RNA binding motif prot 16 (0.00) | 11 (0.55)  | 1.45       |      |
| 11-12 | Gp3 | g.chr9:125004256C>T  | Silent            | RBM18         | p.E160E  | RNA binding motif prot 41 (0.00) | 102 (0.57) | 1.52       |      |
| 11-12 | Gp3 | g.chr9:125004301G>C  | Silent            | RBM18         | p.A145A  | RNA binding motif prot 81 (0.00) | 101 (0.57) | 1.53       |      |
| 11-12 | Gp3 | g.chr10:112581173T>C | Silent            | RBM20         | p.I932I  | RNA binding motif prot 70 (0.00) | 19 (0.42)  | 1.12       |      |
| 11-12 | Gp3 | g.chr11:63681529A>G  | Missense Mutation | RCOR2         | p.M263T  | REST corepressor 2               | 18 (0.00)  | 73 (0.29)  | 0.77 |
| 11-12 | Gp3 | g.chr19:45532166C>T  | Silent            | RELB          | p.L303L  | v-rel avian reticuloendo         | 25 (0.00)  | 206 (0.52) | 1.40 |
| 11-12 | Gp3 | g.chr19:45532187A>G  | Missense Mutation | RELB          | p.K310E  | v-rel avian reticuloendo         | 26 (0.00)  | 199 (0.45) | 1.21 |
| 11-12 | Gp3 | g.chr16:726712C>T    | Missense Mutation | RHBDL1        | p.A81V   | rhomboid, veinlet-like 1         | 25 (0.00)  | 102 (0.54) | 1.44 |
| 11-12 | Gp3 | g.chr8:22864834C>A   | Missense Mutation | RHOBTB2       | p.P381H  | Rho-related BTB domai            | 30 (0.00)  | 122 (0.34) | 0.92 |
| 11-12 | Gp3 | g.chr8:22865133G>A   | Missense Mutation | RHOBTB2       | p.D481N  | Rho-related BTB domai            | 132 (0.00) | 117 (0.51) | 1.37 |
| 11-12 | Gp3 | g.chr8:22865225G>C   | Silent            | RHOBTB2       | p.R511R  | Rho-related BTB domai            | 65 (0.00)  | 82 (0.38)  | 1.01 |
| 11-12 | Gp3 | g.chr20:43385671G>T  | Nonsense Mutation | RIMS4         | p.Y154*  | regulating synaptic men          | 66 (0.00)  | 265 (0.39) | 1.04 |
| 11-12 | Gp3 | g.chr6:3085536G>C    | Silent            | RIPK1         | p.G244G  | receptor (TNFRSF)-inte           | 55 (0.00)  | 15 (0.40)  | 1.07 |
| 11-12 | Gp3 | g.chr3:49758704G>A   | Missense Mutation | RNF123        | p.G1304E | ring finger protein 123          | 206 (0.00) | 116 (0.16) | 0.44 |
| 11-12 | Gp3 | g.chr13:79090042G>C  | RNA               | RNF219-AS1    |          | RNF219 antisense RNA             | 15 (0.00)  | 63 (0.56)  | 1.48 |
| 11-12 | Gp3 | g.chr11:119205839G>A | Missense Mutation | RNF26         | p.A3T    | ring finger protein 26           | 22 (0.00)  | 29 (0.69)  | 1.84 |
| 11-12 | Gp3 | g.chr3:77089984T>C   | Silent            | ROBO2         | p.Y16Y   | roundabout, axon guida           | 31 (0.00)  | 38 (0.45)  | 1.48 |
| 11-12 | Gp3 | g.chr18:110300C>A    | RNA               | ROCK1P1       |          | Rho-associated, coiled-c         | 75 (0.00)  | 24 (0.33)  | 0.89 |
| 11-12 | Gp3 | g.chr18:110414A>T    | RNA               | ROCK1P1       |          | Rho-associated, coiled-c         | 62 (0.02)  | 50 (0.22)  | 0.59 |
| 11-12 | Gp3 | g.chr9:94486823G>T   | Missense Mutation | ROR2          | p.N651K  | receptor tyrosine kinase         | 34 (0.00)  | 218 (0.44) | 1.19 |
| 11-12 | Gp3 | g.chrX:114953316C>A  | Missense Mutation | RP1-241P17.4  | p.M78I   |                                  | 48 (0.00)  | 22 (0.77)  | 1.29 |
| 11-12 | Gp3 | g.chr10:135233581T>A | Missense Mutation | RP11-108K14   | p.L311Q  |                                  | 18 (0.00)  | 216 (0.21) | 0.57 |
| 11-12 | Gp3 | g.chr7:141897254C>T  | Silent            | RP11-1220K2   | p.L1563L |                                  | 41 (0.00)  | 176 (0.95) | 2.53 |
| 11-12 | Gp3 | g.chr15:85175299T>A  | RNA               | RP11-182J1.1  |          |                                  | 39 (0.00)  | 47 (0.96)  | 2.55 |
| 11-12 | Gp3 | g.chr3:153109795G>A  | RNA               | RP11-23D24.2  |          |                                  | 15 (0.00)  | 22 (0.95)  | 2.55 |
| 11-12 | Gp3 | g.chr2:96191354C>G   | lincRNA           | RP11-440D17.3 |          |                                  | 19 (0.00)  | 188 (0.36) | 0.95 |
| 11-12 | Gp3 | g.chr3:109522760G>T  | lincRNA           | RP11-457K10.1 |          |                                  | 15 (0.00)  | 18 (0.44)  | 1.19 |
| 11-12 | Gp3 | g.chr14:24600980C>A  | Missense Mutation | RP11-468E2.6  | p.S257Y  |                                  | 32 (0.00)  | 120 (0.15) | 0.40 |
| 11-12 | Gp3 | g.chr9:3641577A>G    | lincRNA           | RP11-509J21.1 |          |                                  | 23 (0.00)  | 104 (0.14) | 0.38 |
| 11-12 | Gp3 | g.chr5:162746525G>C  | RNA               | RP11-541P9.3  |          |                                  | 29 (0.00)  | 47 (0.17)  | 0.45 |
| 11-12 | Gp3 | g.chr8:89590983C>A   | RNA               | RP11-586K2.1  |          |                                  | 17 (0.00)  | 23 (0.78)  | 2.09 |
| 11-12 | Gp3 | g.chr4:82944004G>A   | lincRNA           | RP11-689K5.3  |          |                                  | 17 (0.00)  | 12 (0.92)  | 2.44 |
| 11-12 | Gp3 | g.chr5:172190051G>T  | RNA               | RP11-779O18.3 |          |                                  | 43 (0.00)  | 122 (0.17) | 0.46 |
| 11-12 | Gp3 | g.chr4:125467774C>T  | lincRNA           | RP11-9312I.3  |          |                                  | 16 (0.00)  | 195 (0.27) | 0.71 |
| 11-12 | Gp3 | g.chr4:144640210A>T  | RNA               | RP13-578N3.3  |          |                                  | 18 (0.00)  | 37 (0.16)  | 0.43 |

|       |     |                      |                   |             |          |                            |            |            |      |
|-------|-----|----------------------|-------------------|-------------|----------|----------------------------|------------|------------|------|
| 11-12 | Gp3 | g.chr20:18318426C>A  | lincRNA           | RP4-568F9.6 |          |                            | 21 (0.00)  | 30 (0.97)  | 2.58 |
| 11-12 | Gp3 | g.chr1:114310865T>C  | Missense Mutation | RSBN1       | p.K602R  | round spermatid basic p    | 37 (0.00)  | 29 (0.97)  | 2.57 |
| 11-12 | Gp3 | g.chr2:74659693G>C   | Missense Mutation | RTKN        | p.A21G   | rhotekin                   | 23 (0.00)  | 109 (0.76) | 2.03 |
| 11-12 | Gp3 | g.chr2:74659744C>A   | Missense Mutation | RTKN        | p.G4V    | rhotekin                   | 22 (0.00)  | 115 (0.15) | 0.39 |
| 11-12 | Gp3 | g.chr19:39075614G>T  | Missense Mutation | RYR1        | p.R4893L | ryanodine receptor 1 (sk   | 32 (0.00)  | 61 (0.39)  | 1.05 |
| 11-12 | Gp3 | g.chr13:23912386G>A  | Nonsense Mutation | SACS        | p.R1877* | sacsin molecular chaper    | 55 (0.00)  | 184 (0.99) | 2.65 |
| 11-12 | Gp3 | g.chr13:23915774G>A  | Silent            | SACS        | p.I747I  | sacsin molecular chaper    | 123 (0.00) | 30 (0.63)  | 1.69 |
| 11-12 | Gp3 | g.chr22:50886784G>T  | Silent            | SBF1        | p.T1747T | SET binding factor 1       | 34 (0.00)  | 233 (0.32) | 0.86 |
| 11-12 | Gp3 | g.chr11:118015910C>A | Missense Mutation | SCN4B       | p.E32D   | sodium channel, voltage    | 54 (0.00)  | 39 (0.97)  | 2.60 |
| 11-12 | Gp3 | g.chr2:167298083T>C  | Missense Mutation | SCN7A       | p.I660M  | sodium channel, voltage    | 23 (0.00)  | 16 (0.44)  | 1.17 |
| 11-12 | Gp3 | g.chr2:167298132A>G  | Missense Mutation | SCN7A       | p.F644S  | sodium channel, voltage    | 91 (0.00)  | 17 (0.47)  | 1.25 |
| 11-12 | Gp3 | g.chr14:81952664T>C  | Silent            | SEL1L       | p.A589A  | sel-1 suppressor of lin-1  | 203 (0.00) | 59 (0.39)  | 1.04 |
| 11-12 | Gp3 | g.chr22:19708360G>T  | Nonsense Mutation | SEPT5       | p.E229*  | septin 5                   | 23 (0.00)  | 114 (0.97) | 2.60 |
| 11-12 | Gp3 | g.chr17:2280048C>A   | Missense Mutation | SGSM2       | p.D832E  | small G protein signalin   | 26 (0.00)  | 56 (0.32)  | 0.86 |
| 11-12 | Gp3 | g.chr22:40804391C>G  | Silent            | SGSM3       | p.S580S  | small G protein signalin   | 29 (0.00)  | 122 (0.62) | 1.66 |
| 11-12 | Gp3 | g.chr9:130536582C>A  | Missense Mutation | SH2D3C      | p.A68S   | SH2 domain containing      | 23 (0.00)  | 87 (0.28)  | 0.74 |
| 11-12 | Gp3 | g.chr9:130536631T>C  | Silent            | SH2D3C      | p.E51E   | SH2 domain containing      | 51 (0.00)  | 84 (0.26)  | 0.70 |
| 11-12 | Gp3 | g.chr22:38046692G>T  | Missense Mutation | SH3BP1      | p.A520S  | SH3-domain binding pr      | 33 (0.00)  | 208 (0.69) | 1.85 |
| 11-12 | Gp3 | g.chr5:148424154A>G  | Silent            | SH3TC2      | p.F109F  | SH3 domain and tetratri    | 31 (0.00)  | 19 (0.47)  | 1.26 |
| 11-12 | Gp3 | g.chr11:70332188C>A  | Missense Mutation | SHANK2      | p.D808Y  | SH3 and multiple ankyr     | 20 (0.00)  | 31 (0.97)  | 2.58 |
| 11-12 | Gp3 | g.chr19:51919422C>T  | Splice Site       | SIGLEC10    |          | sialic acid binding Ig-lik | 22 (0.00)  | 45 (0.31)  | 0.83 |
| 11-12 | Gp3 | g.chr1:232650656T>A  | Missense Mutation | SIPA1L2     | p.I144F  | signal-induced prolifera   | 86 (0.00)  | 123 (0.25) | 0.67 |
| 11-12 | Gp3 | g.chr20:45242194G>A  | Silent            | SLC13A3     | p.L94L   | solute carrier family 13   | 18 (0.00)  | 11 (0.73)  | 1.94 |
| 11-12 | Gp3 | g.chr3:38318930G>A   | Missense Mutation | SLC22A13    | p.A544T  | solute carrier family 22   | 38 (0.03)  | 92 (0.99)  | 2.64 |
| 11-12 | Gp3 | g.chr11:62744780G>T  | Missense Mutation | SLC22A6     | p.L481I  | solute carrier family 22   | 20 (0.00)  | 284 (0.55) | 1.46 |
| 11-12 | Gp3 | g.chr1:16064429A>G   | Silent            | SLC25A34    | p.K128K  | solute carrier family 25,  | 16 (0.00)  | 240 (0.27) | 0.72 |
| 11-12 | Gp3 | g.chr3:48664401G>T   | Missense Mutation | SLC26A6     | p.L625M  | solute carrier family 26   | 28 (0.00)  | 125 (0.22) | 0.60 |
| 11-12 | Gp3 | g.chr3:48667360C>A   | Missense Mutation | SLC26A6     | p.G456C  | solute carrier family 26   | 45 (0.02)  | 179 (0.41) | 1.09 |
| 11-12 | Gp3 | g.chr4:10023016C>A   | Missense Mutation | SLC2A9      | p.G13V   | solute carrier family 2    | 126 (0.00) | 156 (0.66) | 1.76 |
| 11-12 | Gp3 | g.chr2:27481633C>A   | Missense Mutation | SLC30A3     | p.G89W   | solute carrier family 30   | 24 (0.00)  | 195 (0.20) | 0.53 |
| 11-12 | Gp3 | g.chr3:50252996C>A   | RNA               | SLC38A3     |          | solute carrier family 38,  | 36 (0.00)  | 31 (0.55)  | 1.46 |
| 11-12 | Gp3 | g.chr1:153933168C>A  | Missense Mutation | SLC39A1     | p.E127D  | solute carrier family 39   | 53 (0.00)  | 99 (0.91)  | 2.42 |
| 11-12 | Gp3 | g.chr19:33702437T>C  | Silent            | SLC7A10     | p.L265L  | solute carrier family 7    | 126 (0.00) | 23 (0.96)  | 2.55 |
| 11-12 | Gp3 | g.chr18:48591701C>A  | Intron            | SMAD4       |          | SMAD family member         | 103 (0.00) | 82 (0.15)  | 0.39 |
| 11-12 | Gp3 | g.chr7:128850307G>T  | Missense Mutation | SMO         | p.A524S  | smoothened, frizzled cla   | 38 (0.00)  | 485 (0.57) | 1.51 |

|       |     |                      |                   |         |          |                                     |            |      |
|-------|-----|----------------------|-------------------|---------|----------|-------------------------------------|------------|------|
| 11-12 | Gp3 | g.chr6:169051372G>T  | Missense Mutation | SMOC2   | p.A307S  | SPARC related modular 38 (0.00)     | 134 (0.22) | 0.60 |
| 11-12 | Gp3 | g.chr6:109762602G>C  | Missense Mutation | SMPD2   | p.R31S   | sphingomyelin phospho 37 (0.00)     | 116 (0.78) | 2.09 |
| 11-12 | Gp3 | g.chr15:25430825T>C  | RNA               | SNHG14  |          | small nucleolar RNA ho 151 (0.00)   | 66 (0.98)  | 2.63 |
| 11-12 | Gp3 | g.chr15:25451413C>T  | RNA               | SNHG14  |          | small nucleolar RNA ho 47 (0.00)    | 33 (0.33)  | 0.89 |
| 11-12 | Gp3 | g.chr15:25455051G>T  | RNA               | SNHG14  |          | small nucleolar RNA ho 64 (0.00)    | 143 (0.35) | 0.93 |
| 11-12 | Gp3 | g.chr15:25455053G>T  | RNA               | SNHG14  |          | small nucleolar RNA ho 64 (0.00)    | 148 (0.35) | 0.94 |
| 11-12 | Gp3 | g.chr15:25460752A>G  | RNA               | SNHG14  |          | small nucleolar RNA ho 43 (0.00)    | 59 (0.46)  | 1.22 |
| 11-12 | Gp3 | g.chr15:25472303T>C  | RNA               | SNHG14  |          | small nucleolar RNA ho 130 (0.00)   | 404 (0.22) | 0.59 |
| 11-12 | Gp3 | g.chr20:35433266T>C  | Missense Mutation | SOGA1   | p.T987A  | suppressor of glucose, a 37 (0.00)  | 333 (0.28) | 0.74 |
| 11-12 | Gp3 | g.chr12:23999046G>T  | Silent            | SOX5    | p.R108R  | SRY (sex determining r 40 (0.00)    | 26 (0.46)  | 1.23 |
| 11-12 | Gp3 | g.chr11:124545299C>A | Missense Mutation | SPA17   | p.L47I   | sperm autoantigenic pro 76 (0.00)   | 299 (0.17) | 0.45 |
| 11-12 | Gp3 | g.chr4:57677935G>A   | Missense Mutation | SPINK2  | p.P42L   | serine peptidase inhibito 69 (0.01) | 321 (0.83) | 2.22 |
| 11-12 | Gp3 | g.chr1:32259391T>A   | Missense Mutation | SPOCD1  | p.M831L  | SPOC domain containin 27 (0.00)     | 23 (0.43)  | 1.16 |
| 11-12 | Gp3 | g.chr17:47720167G>C  | Intron            | SPOP    |          | speckle-type POZ protei 46 (0.00)   | 21 (0.29)  | 0.76 |
| 11-12 | Gp3 | g.chr14:65237774T>C  | Missense Mutation | SPTB    | p.N1876S | spectrin, beta, erythrocy 17 (0.00) | 25 (0.60)  | 1.60 |
| 11-12 | Gp3 | g.chr14:65262333C>G  | Missense Mutation | SPTB    | p.A456P  | spectrin, beta, erythrocy 59 (0.02) | 270 (0.83) | 2.22 |
| 11-12 | Gp3 | g.chr11:66458764G>T  | Silent            | SPTBN2  | p.L1852L | spectrin, beta, non-eryth 36 (0.00) | 90 (0.76)  | 2.01 |
| 11-12 | Gp3 | g.chr15:42169366A>G  | Missense Mutation | SPTBN5  | p.F1220S | spectrin, beta, non-eryth 31 (0.00) | 105 (0.15) | 0.41 |
| 11-12 | Gp3 | g.chr2:170668190G>A  | Missense Mutation | SSB     | p.R384K  | Sjogren syndrome antigen 144 (0.00) | 21 (0.71)  | 1.90 |
| 11-12 | Gp3 | g.chr7:149503118C>A  | RNA               | SSPO    |          | SCO-spondin 17 (0.00)               | 35 (0.46)  | 1.22 |
| 11-12 | Gp3 | g.chr3:98510824C>A   | Missense Mutation | ST3GAL6 | p.S299Y  | ST3 beta-galactoside al 52 (0.00)   | 165 (0.72) | 1.91 |
| 11-12 | Gp3 | g.chr11:8720510C>A   | Silent            | ST5     | p.V483V  | suppression of tumorige 70 (0.00)   | 118 (0.24) | 0.63 |
| 11-12 | Gp3 | g.chr7:74303879A>G   | RNA               | STAG3L2 |          | stromal antigen 3-like 2 198 (0.00) | 14 (0.43)  | 1.14 |
| 11-12 | Gp3 | g.chr7:74303896A>G   | RNA               | STAG3L2 |          | stromal antigen 3-like 2 28 (0.00)  | 9 (0.56)   | 1.48 |
| 11-12 | Gp3 | g.chr7:75651205C>T   | Missense Mutation | STYXL1  | p.D91N   | serine/threonine/tyrosin 53 (0.00)  | 19 (0.53)  | 1.40 |
| 11-12 | Gp3 | g.chr9:136231733C>A  | Missense Mutation | SURF4   | p.D176Y  | surfeit 4 63 (0.00)                 | 32 (0.97)  | 2.58 |
| 11-12 | Gp3 | g.chr10:29839685G>T  | Missense Mutation | SVIL    | p.A223E  | supervillin 28 (0.00)               | 345 (0.73) | 1.96 |
| 11-12 | Gp3 | g.chr7:138363236C>A  | Missense Mutation | SVOPL   | p.E39D   | SVOP-like 40 (0.00)                 | 91 (0.25)  | 0.67 |
| 11-12 | Gp3 | g.chr19:46327091C>A  | Missense Mutation | SYMPK   | p.V845L  | symplekin 27 (0.00)                 | 21 (0.62)  | 1.65 |
| 11-12 | Gp3 | g.chr6:152646330G>A  | Silent            | SYNE1   | p.S5182S | spectrin repeat containi 100 (0.00) | 118 (0.47) | 1.24 |
| 11-12 | Gp3 | g.chr15:99671498G>T  | Missense Mutation | SYNM    | p.G692V  | synemin, intermediate fi 19 (0.00)  | 47 (0.19)  | 0.51 |
| 11-12 | Gp3 | g.chr12:33592330C>A  | Missense Mutation | SYT10   | p.G43V   | synaptotagmin X 34 (0.00)           | 343 (0.20) | 0.54 |
| 11-12 | Gp3 | g.chr1:229730234G>T  | Missense Mutation | TAF5L   | p.S527Y  | TAF5-like RNA polym 42 (0.00)       | 132 (0.83) | 2.22 |
| 11-12 | Gp3 | g.chr6:159458117T>C  | Missense Mutation | TAGAP   | p.N313S  | T-cell activation RhoGI 16 (0.00)   | 320 (0.22) | 0.58 |
| 11-12 | Gp3 | g.chr2:160086878G>T  | Silent            | TANC1   | p.G1647G | tetratricopeptide repeat, 96 (0.00) | 73 (0.36)  | 0.95 |



|       |     |                     |                   |                  |          |                                      |            |      |
|-------|-----|---------------------|-------------------|------------------|----------|--------------------------------------|------------|------|
| 11-12 | Gp3 | g.chr2:160086933T>C | Missense Mutation | TANC1            | p.S1666P | tetratricopeptide repeat, 131 (0.00) | 108 (0.54) | 1.43 |
| 11-12 | Gp3 | g.chr12:6566645C>T  | Silent            | TAPBPL           | p.G136G  | TAP binding protein-like 77 (0.00)   | 326 (0.91) | 2.44 |
| 11-12 | Gp3 | g.chr1:6639273G>T   | Nonsense Mutation | TAS1R1           | p.E719*  | taste receptor, type 1, m 79 (0.00)  | 129 (0.18) | 0.48 |
| 11-12 | Gp3 | g.chr9:100971315G>A | Silent            | TBC1D2           | p.L595L  | TBC1 domain family, n 43 (0.02)      | 293 (0.17) | 0.46 |
| 11-12 | Gp3 | g.chr17:18541992C>T | Missense Mutation | TBC1D28          | p.R74H   | TBC1 domain family, n 83 (0.00)      | 255 (0.55) | 1.46 |
| 11-12 | Gp3 | g.chr17:58089857C>T | lincRNA           | TBC1D3P1-DHX40P1 |          | TBC1D3P1-DHX40P1 150 (0.00)          | 129 (0.42) | 1.12 |
| 11-12 | Gp3 | g.chr17:59556122C>A | Silent            | TBX4             | p.T228T  | T-box 4 88 (0.00)                    | 55 (0.31)  | 0.82 |
| 11-12 | Gp3 | g.chr22:42606933G>A | Missense Mutation | TCF20            | p.P1460L | transcription factor 20 159 (0.02)   | 128 (0.69) | 1.83 |
| 11-12 | Gp3 | g.chr1:152080373G>T | Missense Mutation | TCHH             | p.R1774S | trichohyalin 44 (0.00)               | 8 (0.62)   | 1.67 |
| 11-12 | Gp3 | g.chr3:49449941G>T  | Nonsense Mutation | TCTA             | p.E28*   | T-cell leukemia transloc 25 (0.00)   | 46 (0.39)  | 1.04 |
| 11-12 | Gp3 | g.chr2:95542422G>A  | Missense Mutation | TEKT4            | p.A406T  | tektin 4 34 (0.00)                   | 255 (0.22) | 0.59 |
| 11-12 | Gp3 | g.chr14:20849765C>A | Missense Mutation | TEP1             | p.R1394L | telomerase-associated p 49 (0.00)    | 284 (0.15) | 0.39 |
| 11-12 | Gp3 | g.chr2:74327822C>A  | Missense Mutation | TET3             | p.P1168T | tet methylcytosine dioxy 88 (0.01)   | 172 (0.42) | 1.13 |
| 11-12 | Gp3 | g.chr22:26895383T>C | Missense Mutation | TFIP11           | p.D339G  | tuftelin interacting prote 74 (0.00) | 18 (0.83)  | 2.22 |
| 11-12 | Gp3 | g.chr20:36789901C>A | Missense Mutation | TGM2             | p.Q37H   | transglutaminase 2 53 (0.02)         | 225 (0.27) | 0.72 |
| 11-12 | Gp3 | g.chr15:43552701G>A | Silent            | TGM5             | p.D29D   | transglutaminase 5 40 (0.00)         | 13 (0.38)  | 1.03 |
| 11-12 | Gp3 | g.chr1:6692954C>T   | Silent            | THAP3            | p.S179S  | THAP domain containir 35 (0.00)      | 347 (0.17) | 0.46 |
| 11-12 | Gp3 | g.chr1:151825993C>A | Missense Mutation | THEM5            | p.G17C   | thioesterase superfamily 24 (0.00)   | 32 (0.38)  | 1.00 |
| 11-12 | Gp3 | g.chr6:155569169G>C | Missense Mutation | TIAM2            | p.A566P  | T-cell lymphoma invasi 123 (0.00)    | 82 (0.21)  | 0.55 |
| 11-12 | Gp3 | g.chr7:75617571G>T  | RNA               | TMEM120A         |          | transmembrane protein 15 (0.00)      | 415 (0.25) | 0.67 |
| 11-12 | Gp3 | g.chr17:32956079G>T | Missense Mutation | TMEM132E         | p.E308D  | transmembrane protein 26 (0.00)      | 28 (0.32)  | 0.86 |
| 11-12 | Gp3 | g.chr12:57472525C>A | Missense Mutation | TMEM194A         | p.A2S    | transmembrane protein 15 (0.00)      | 162 (0.21) | 0.56 |
| 11-12 | Gp3 | g.chr1:15546042A>G  | Missense Mutation | TMEM51           | p.R189G  | transmembrane protein 47 (0.00)      | 20 (0.35)  | 0.93 |
| 11-12 | Gp3 | g.chr16:425386G>C   | Missense Mutation | TMEM8A           | p.S425W  | transmembrane protein 24 (0.00)      | 106 (0.91) | 2.42 |
| 11-12 | Gp3 | g.chr21:42851386C>A | Intron            | TMPRSS2          |          | transmembrane protease 56 (0.00)     | 55 (0.25)  | 0.68 |
| 11-12 | Gp3 | g.chr19:2422217G>T  | Silent            | TMPRSS9          | p.P806P  | transmembrane protease 29 (0.00)     | 182 (0.37) | 0.98 |
| 11-12 | Gp3 | g.chr8:145657682G>A | Nonsense Mutation | TONSL            | p.R1241* | tonsoku-like, DNA repa 57 (0.02)     | 501 (0.36) | 0.95 |
| 11-12 | Gp3 | g.chr15:43748971C>T | Missense Mutation | TP53BP1          | p.R612K  | tumor protein p53 bindir 44 (0.00)   | 89 (0.76)  | 2.04 |
| 11-12 | Gp3 | g.chr3:127298894C>G | Silent            | TPRA1            | p.L32L   | transmembrane protein, 18 (0.00)     | 89 (0.15)  | 0.39 |
| 11-12 | Gp3 | g.chr13:20000598C>G | Silent            | TPTE2            | p.L414L  | transmembrane phospho 19 (0.00)      | 15 (0.60)  | 1.60 |
| 11-12 | Gp3 | g.chr6:42227334G>A  | Missense Mutation | TRERF1           | p.P671L  | transcriptional regulatin 52 (0.00)  | 29 (0.55)  | 1.47 |
| 11-12 | Gp3 | g.chr1:155148119G>T | Missense Mutation | TRIM46           | p.K107N  | tripartite motif containir 42 (0.00) | 371 (0.20) | 0.52 |
| 11-12 | Gp3 | g.chr6:126329583G>A | Missense Mutation | TRMT11           | p.G242E  | tRNA methyltransferase 147 (0.01)    | 106 (0.58) | 1.56 |
| 11-12 | Gp3 | g.chr1:28898388G>T  | Nonsense Mutation | TRNAU1AP         | p.E235*  | tRNA selenocysteine 1 40 (0.00)      | 155 (0.45) | 1.20 |
| 11-12 | Gp3 | g.chr9:77442683G>C  | Missense Mutation | TRPM6            | p.H284Q  | transient receptor potent 36 (0.00)  | 11 (0.91)  | 2.42 |

|       |     |                      |                   |         |           |                                            |            |      |
|-------|-----|----------------------|-------------------|---------|-----------|--------------------------------------------|------------|------|
| 11-12 | Gp3 | g.chr8:116427039C>A  | Missense Mutation | TRPS1   | p.V1033F  | trichorhinophalangeal syndrome 62 (0.00)   | 32 (0.97)  | 2.58 |
| 11-12 | Gp3 | g.chr17:3493169G>T   | Missense Mutation | TRPV1   | p.L326M   | transient receptor potential 18 (0.00)     | 116 (0.17) | 0.46 |
| 11-12 | Gp3 | g.chr6:116600955G>A  | Silent            | TSPYL1  | p.L13L    | TSPY-like 1 53 (0.00)                      | 635 (0.14) | 0.39 |
| 11-12 | Gp3 | g.chr16:1399502C>A   | Missense Mutation | TSR3    | p.R292L   | TSR3, 20S rRNA accumulation 63 (0.00)      | 245 (0.35) | 0.93 |
| 11-12 | Gp3 | g.chr2:166775842C>G  | Missense Mutation | TTC21B  | p.E540Q   | tetratricopeptide repeat 36 (0.00)         | 37 (0.51)  | 1.37 |
| 11-12 | Gp3 | g.chr22:28503730C>A  | Silent            | TTC28   | p.L701L   | tetratricopeptide repeat 74 (0.00)         | 159 (0.18) | 0.47 |
| 11-12 | Gp3 | g.chr1:117631480C>T  | Missense Mutation | TTF2    | p.H740Y   | transcription termination factor 79 (0.00) | 11 (0.91)  | 2.42 |
| 11-12 | Gp3 | g.chr1:117631523G>T  | Missense Mutation | TTF2    | p.C754F   | transcription termination factor 91 (0.00) | 12 (0.92)  | 2.44 |
| 11-12 | Gp3 | g.chr2:179464467C>T  | Missense Mutation | TTN     | p.A18721T | titin 90 (0.00)                            | 398 (0.26) | 0.70 |
| 11-12 | Gp3 | g.chr20:43109015G>A  | Missense Mutation | TTPAL   | p.A126T   | tocopherol (alpha) transferase 68 (0.00)   | 41 (0.93)  | 2.47 |
| 11-12 | Gp3 | g.chr20:44443087C>A  | Missense Mutation | UBE2C   | p.T65N    | ubiquitin-conjugating enzyme 23 (0.00)     | 45 (0.91)  | 2.43 |
| 11-12 | Gp3 | g.chr17:74387112C>A  | Missense Mutation | UBE2O   | p.G1264V  | ubiquitin-conjugating enzyme 51 (0.00)     | 63 (0.97)  | 2.58 |
| 11-12 | Gp3 | g.chr17:74396274C>T  | Missense Mutation | UBE2O   | p.C370Y   | ubiquitin-conjugating enzyme 16 (0.00)     | 180 (0.17) | 0.46 |
| 11-12 | Gp3 | g.chr15:43398146C>A  | Silent            | UBR1    | p.L25L    | ubiquitin protein ligase 145 (0.00)        | 26 (0.85)  | 2.26 |
| 11-12 | Gp3 | g.chr1:19480291C>A   | Nonsense Mutation | UBR4    | p.E2201*  | ubiquitin protein ligase 116 (0.00)        | 259 (0.27) | 0.71 |
| 11-12 | Gp3 | g.chr10:73051242G>T  | Missense Mutation | UNC5B   | p.G450C   | unc-5 homolog B (C. elegans) 19 (0.00)     | 43 (0.26)  | 0.68 |
| 11-12 | Gp3 | g.chr3:126226900C>A  | Missense Mutation | UROCI   | p.E150D   | urocanate hydratase 1 74 (0.00)            | 34 (0.50)  | 1.33 |
| 11-12 | Gp3 | g.chr10:11504945C>A  | Missense Mutation | USP6NL  | p.G661V   | USP6 N-terminal like 55 (0.00)             | 136 (0.15) | 0.39 |
| 11-12 | Gp3 | g.chr12:101773315A>G | Silent            | UTP20   | p.L2521L  | UTP20, small subunit 56 (0.00)             | 27 (0.30)  | 0.79 |
| 11-12 | Gp3 | g.chr1:151156819G>A  | Missense Mutation | VPS72   | p.T179I   | vacuolar protein sorting 110 (0.00)        | 84 (0.50)  | 1.33 |
| 11-12 | Gp3 | g.chr10:104569779C>A | Missense Mutation | WBP1L   | p.A87D    | WW domain binding protein 157 (0.00)       | 462 (0.54) | 1.43 |
| 11-12 | Gp3 | g.chr4:10090363G>T   | Missense Mutation | WDR1    | p.D187E   | WD repeat domain 1 20 (0.00)               | 16 (0.38)  | 1.00 |
| 11-12 | Gp3 | g.chr9:96024979G>C   | Missense Mutation | WNK2    | p.G1130R  | WNK lysine deficient protein 34 (0.00)     | 151 (0.19) | 0.51 |
| 11-12 | Gp3 | g.chr7:116937714C>T  | Missense Mutation | WNT2    | p.V269M   | wingless-type MMTV insertion 118 (0.00)    | 122 (0.94) | 2.51 |
| 11-12 | Gp3 | g.chr22:41303637C>T  | Missense Mutation | XPNPEP3 | p.A280V   | X-prolyl aminopeptidase 38 (0.00)          | 57 (0.23)  | 0.61 |
| 11-12 | Gp3 | g.chr17:7193336G>T   | Missense Mutation | YBX2    | p.Q267K   | Y box binding protein 2 20 (0.00)          | 54 (0.22)  | 0.59 |
| 11-12 | Gp3 | g.chr19:59028481G>T  | Missense Mutation | ZBTB45  | p.P187H   | zinc finger and BTB domain 15 (0.00)       | 28 (0.46)  | 1.24 |
| 11-12 | Gp3 | g.chr8:135614792C>A  | Missense Mutation | ZFAT    | p.E390D   | zinc finger and AT hook 102 (0.00)         | 179 (0.21) | 0.55 |
| 11-12 | Gp3 | g.chr8:135614810G>T  | Silent            | ZFAT    | p.V384V   | zinc finger and AT hook 112 (0.00)         | 224 (0.33) | 0.87 |
| 11-12 | Gp3 | g.chr14:24001800G>A  | Silent            | ZFHX2   | p.H845H   | zinc finger homeobox 2 48 (0.00)           | 61 (0.33)  | 0.87 |
| 11-12 | Gp3 | g.chr14:24001808C>G  | Missense Mutation | ZFHX2   | p.A843P   | zinc finger homeobox 2 48 (0.00)           | 62 (0.58)  | 1.55 |
| 11-12 | Gp3 | g.chr10:99504537G>T  | Missense Mutation | ZFYVE27 | p.G107V   | zinc finger, FYVE domain 42 (0.00)         | 41 (0.27)  | 0.72 |
| 11-12 | Gp3 | g.chr11:123601271T>C | Missense Mutation | ZNF202  | p.Q109R   | zinc finger protein 202 37 (0.00)          | 16 (0.81)  | 2.17 |
| 11-12 | Gp3 | g.chr19:53432497C>T  | Missense Mutation | ZNF321P | p.E121K   | zinc finger protein 321, 175 (0.00)        | 23 (0.83)  | 2.20 |
| 11-12 | Gp3 | g.chr17:40179746G>A  | Splice Site       | ZNF385C | p.H390Y   | zinc finger protein 385C 24 (0.00)         | 131 (0.60) | 0.87 |

|       |     |                      |                   |            |          |                           |             |            |      |
|-------|-----|----------------------|-------------------|------------|----------|---------------------------|-------------|------------|------|
| 11-12 | Gp3 | g.chr7:148876156C>A  | Missense Mutation | ZNF398     | p.P398T  | zinc finger protein 398   | 25 (0.00)   | 44 (0.45)  | 1.21 |
| 11-12 | Gp3 | g.chr16:49557538C>G  | Silent            | ZNF423     | p.L1274L | zinc finger protein 423   | 42 (0.00)   | 58 (0.72)  | 0.90 |
| 11-12 | Gp3 | g.chr16:49670681C>A  | Silent            | ZNF423     | p.V794V  | zinc finger protein 423   | 30 (0.00)   | 26 (0.92)  | 1.15 |
| 11-12 | Gp3 | g.chr19:52538198T>A  | Missense Mutation | ZNF432     | p.K245M  | zinc finger protein 432   | 116 (0.00)  | 244 (1.00) | 2.66 |
| 11-12 | Gp3 | g.chr19:42730037C>A  | Missense Mutation | ZNF526     | p.H494Q  | zinc finger protein 526   | 33 (0.00)   | 183 (0.22) | 0.58 |
| 11-12 | Gp3 | g.chr15:85327554C>A  | Missense Mutation | ZNF592     | p.L550M  | zinc finger protein 592   | 48 (0.00)   | 243 (0.22) | 0.58 |
| 11-12 | Gp3 | g.chr16:30582401C>A  | Missense Mutation | ZNF688     | p.Q80H   | zinc finger protein 688   | 17 (0.00)   | 88 (0.73)  | 1.94 |
| 11-12 | Gp3 | g.chr16:30616623G>C  | Silent            | ZNF689     | p.G155G  | zinc finger protein 689   | 86 (0.00)   | 249 (0.14) | 0.39 |
| 11-12 | Gp3 | g.chr19:21477066G>A  | Silent            | ZNF708     | p.N234N  | zinc finger protein 708   | 28 (0.00)   | 49 (0.98)  | 2.61 |
| 11-12 | Gp3 | g.chr15:90611827G>T  | Splice Site       | ZNF710     | p.K486N  | zinc finger protein 710   | 66 (0.00)   | 288 (0.70) | 1.86 |
| 11-12 | Gp3 | g.chr7:148767849C>G  | Missense Mutation | ZNF786     | p.G672A  | zinc finger protein 786   | 139 (0.01)  | 685 (0.58) | 1.54 |
| 11-12 | Gp3 | g.chr7:149559007G>A  | Missense Mutation | ZNF862     | p.D920N  | zinc finger protein 862   | 63 (0.00)   | 238 (0.25) | 0.67 |
| 11-12 | Gp3 | g.chr7:149559429G>T  | Missense Mutation | ZNF862     | p.E1060D | zinc finger protein 862   | 47 (0.00)   | 33 (0.15)  | 0.40 |
| 11-12 | Gp3 | g.chr19:23542612T>A  | Nonsense Mutation | ZNF91      | p.K1057* | zinc finger protein 91    | 61 (0.00)   | 16 (0.44)  | 1.17 |
| 11-12 | Gp3 | g.chr20:47886619A>G  | Missense Mutation | ZNFX1      | p.L577S  | zinc finger, NFX1-type    | 67 (0.00)   | 40 (0.23)  | 0.60 |
| 11-12 | Gp3 | g.chr15:43661273G>A  | Missense Mutation | ZSCAN29    | p.P124L  | zinc finger and SCAN d32  | 32 (0.00)   | 32 (0.97)  | 2.58 |
| 11-12 | Gp3 | g.chr3:126180671G>T  | Missense Mutation | ZXDC       | p.L612M  | ZXD family zinc finger    | 27 (0.00)   | 61 (0.84)  | 2.23 |
| 11-12 | Gp4 | g.chr9:133729486C>T  | Missense Mutation | ABL1       | p.P39S   | ABL proto-oncogene 1, 45  | 45 (0.00)   | 45 (0.16)  | 0.41 |
| 11-12 | Gp4 | g.chr2:243037101A>G  | RNA               | AC093642.5 |          |                           | 50 (0.00)   | 23 (0.30)  | 1.15 |
| 11-12 | Gp4 | g.chr1:4771995G>A    | Missense Mutation | AJAP1      | p.G22E   | adherens junctions asso   | 30 (0.00)   | 149 (0.16) | 0.43 |
| 11-12 | Gp4 | g.chr10:37422892C>A  | Silent            | ANKRD30A   | p.G166G  | ankyrin repeat domain     | 362 (0.00)  | 49 (0.53)  | 1.41 |
| 11-12 | Gp4 | g.chr10:47663294G>A  | Splice Site       | ANTXRL     | p.K83K   | anthrax toxin receptor-li | 91 (0.00)   | 27 (0.41)  | 1.09 |
| 11-12 | Gp4 | g.chr19:2121284G>A   | Silent            | AP3D1      | p.I376I  | adaptor-related protein c | 19 (0.00)   | 53 (0.17)  | 0.45 |
| 11-12 | Gp4 | g.chr4:41015776T>C   | Missense Mutation | APBB2      | p.D220G  | amyloid beta (A4) precu   | 122 (0.00)  | 18 (0.33)  | 0.89 |
| 11-12 | Gp4 | g.chr5:112173418C>T  | Silent            | APC        | p.N709N  | adenomatous polyposis     | 73 (0.00)   | 43 (0.74)  | 1.98 |
| 11-12 | Gp4 | g.chr18:24411495C>T  | RNA               | AQP4-AS1   |          | AQP4 antisense RNA        | 165 (0.00)  | 34 (0.41)  | 1.10 |
| 11-12 | Gp4 | g.chr5:141053348C>T  | Silent            | ARAP3      | p.R164R  | ArfGAP with RhoGAP        | 27 (0.00)   | 30 (0.20)  | 0.53 |
| 11-12 | Gp4 | g.chr14:75143381T>C  | Missense Mutation | AREL1      | p.T186A  | apoptosis resistant E3 ul | 51 (0.00)   | 13 (0.69)  | 1.39 |
| 11-12 | Gp4 | g.chr13:111862328C>T | Silent            | ARHGEF7    | p.F149F  | Rho guanine nucleotide    | 17 (0.00)   | 26 (0.31)  | 0.82 |
| 11-12 | Gp4 | g.chr12:46245258C>A  | Missense Mutation | ARID2      | p.Q1118K | AT rich interactive dom   | 91 (0.01)   | 40 (0.15)  | 0.40 |
| 11-12 | Gp4 | g.chr11:74985246C>A  | Silent            | ARRB1      | p.V262V  | arrestin, beta 1          | 40 (0.03)   | 11 (0.55)  | 1.45 |
| 11-12 | Gp4 | g.chr11:113661063C>A | RNA               | ATF4P4     |          | activating transcription  | 123 (0.00)  | 35 (0.46)  | 1.22 |
| 11-12 | Gp4 | g.chr2:220088871G>T  | Missense Mutation | ATG9A      | p.L408M  | autophagy related 9A      | 79 (0.00)   | 145 (0.16) | 0.42 |
| 11-12 | Gp4 | g.chr13:113487275G>A | Silent            | ATP11A     | p.G499G  | ATPase, class VI, type    | 1111 (0.00) | 242 (0.19) | 0.51 |
| 11-12 | Gp4 | g.chr1:154306619A>G  | Missense Mutation | ATP8B2     | p.D242G  | ATPase, aminophospho      | 117 (0.00)  | 10 (0.80)  | 2.13 |

|       |     |                      |                   |             |          |                                     |            |      |
|-------|-----|----------------------|-------------------|-------------|----------|-------------------------------------|------------|------|
| 11-12 | Gp4 | g.chr19:41763489G>A  | Missense Mutation | AXL         | p.R763H  | AXL receptor tyrosine k37 (0.00)    | 19 (0.89)  | 2.39 |
| 11-12 | Gp4 | g.chr6:56857269G>T   | Missense Mutation | BEND6       | p.A72S   | BEN domain containing90 (0.00)      | 29 (0.31)  | 0.83 |
| 11-12 | Gp4 | g.chr22:43524576C>A  | Missense Mutation | BIK         | p.T112N  | BCL2-interacting killer 18 (0.00)   | 74 (0.24)  | 0.65 |
| 11-12 | Gp4 | g.chr5:137480923G>A  | Missense Mutation | BRD8        | p.P1127L | bromodomain containin,45 (0.00)     | 37 (0.16)  | 0.43 |
| 11-12 | Gp4 | g.chr20:11899114C>T  | Missense Mutation | BTBD3       | p.A64V   | BTB (POZ) domain con242 (0.00)      | 101 (0.19) | 0.50 |
| 11-12 | Gp4 | g.chr1:75072562G>C   | Missense Mutation | C1orf173    | p.D404E  | 47 (0.00)                           | 23 (0.57)  | 1.51 |
| 11-12 | Gp4 | g.chr1:154186378G>A  | Missense Mutation | C1orf43     | p.R111C  | chromosome 1 open rea59 (0.02)      | 24 (0.33)  | 0.89 |
| 11-12 | Gp4 | g.chr1:150255762G>A  | Missense Mutation | C1orf51     | p.G29S   | 59 (0.00)                           | 98 (0.18)  | 0.49 |
| 11-12 | Gp4 | g.chr22:19839188G>A  | Silent            | C22orf29    | p.A199A  | chromosome 22 open re27 (0.00)      | 26 (0.19)  | 0.51 |
| 11-12 | Gp4 | g.chr3:112730132C>A  | Missense Mutation | C3orf17     | p.D225Y  | chromosome 3 open rea136 (0.00)     | 28 (0.18)  | 0.48 |
| 11-12 | Gp4 | g.chr9:35677799G>A   | Missense Mutation | CA9         | p.E285K  | carbonic anhydrase IX 25 (0.00)     | 19 (0.84)  | 2.25 |
| 11-12 | Gp4 | g.chr1:65137348A>G   | Missense Mutation | CACHD1      | p.Q779R  | cache domain containin,90 (0.00)    | 11 (0.45)  | 1.21 |
| 11-12 | Gp4 | g.chr3:85502014C>T   | Intron            | CADM2       |          | cell adhesion molecule 275 (0.00)   | 27 (0.59)  | 1.58 |
| 11-12 | Gp4 | g.chr3:85551454G>T   | Intron            | CADM2       |          | cell adhesion molecule 271 (0.00)   | 28 (0.43)  | 1.14 |
| 11-12 | Gp4 | g.chr1:15819512C>T   | Missense Mutation | CASP9       | p.V393M  | caspace 9, apoptosis-rel,30 (0.00)  | 16 (0.38)  | 1.00 |
| 11-12 | Gp4 | g.chr12:124428006C>A | Silent            | CCDC92      | p.L6L    | coiled-coil domain cont,27 (0.00)   | 55 (0.16)  | 0.44 |
| 11-12 | Gp4 | g.chr13:37011999G>A  | Silent            | CCNA1       | p.L177L  | cyclin A1 125 (0.00)                | 57 (0.19)  | 0.51 |
| 11-12 | Gp4 | g.chr9:4685069G>A    | Missense Mutation | CDC37L1     | p.E109K  | cell division cycle 37-li,71 (0.00) | 19 (0.47)  | 1.26 |
| 11-12 | Gp4 | g.chr10:62545434G>T  | Silent            | CDK1        | p.V69V   | cyclin-dependent kinase 114 (0.00)  | 39 (0.41)  | 1.09 |
| 11-12 | Gp4 | g.chr12:88500602C>A  | Missense Mutation | CEP290      | p.L889F  | centrosomal protein 29045 (0.00)    | 33 (0.15)  | 0.40 |
| 11-12 | Gp4 | g.chr5:648027C>A     | Missense Mutation | CEP72       | p.H592N  | centrosomal protein 72k29 (0.00)    | 10 (0.50)  | 1.85 |
| 11-12 | Gp4 | g.chr12:50524465C>T  | Missense Mutation | CERS5       | p.D348N  | ceramide synthase 5 25 (0.00)       | 11 (0.64)  | 1.70 |
| 11-12 | Gp4 | g.chr1:6228789G>A    | Intron            | CHD5        |          | chromodomain helicase 26 (0.00)     | 29 (0.21)  | 0.55 |
| 11-12 | Gp4 | g.chr17:17179439C>T  | Missense Mutation | COP9        | p.G12E   | COP9 signalosome sub,42 (0.00)      | 24 (0.29)  | 0.78 |
| 11-12 | Gp4 | g.chr16:57490445C>T  | Silent            | COQ9        | p.S136S  | coenzyme Q9 97 (0.00)               | 29 (0.41)  | 0.49 |
| 11-12 | Gp4 | g.chr19:20370053T>C  | RNA               | CTC-260E6.6 |          | 51 (0.00)                           | 50 (0.32)  | 0.85 |
| 11-12 | Gp4 | g.chr20:56098977C>T  | Silent            | CTCFL       | p.Q95Q   | CCCTC-binding factor (61 (0.00)     | 32 (0.16)  | 0.42 |
| 11-12 | Gp4 | g.chr5:156727772C>A  | Missense Mutation | CYFIP2      | p.A120D  | cytoplasmic FMR1 inter,25 (0.00)    | 36 (0.17)  | 0.44 |
| 11-12 | Gp4 | g.chr19:15791077C>A  | Missense Mutation | CYP4F12     | p.L123I  | cytochrome P450, famil,151 (0.00)   | 13 (0.54)  | 1.44 |
| 11-12 | Gp4 | g.chr9:124395930G>T  | Intron            | DAB2IP      |          | DAB2 interacting protei,90 (0.00)   | 29 (0.38)  | 1.01 |
| 11-12 | Gp4 | g.chr9:124505422C>T  | Intron            | DAB2IP      |          | DAB2 interacting protei,53 (0.00)   | 47 (0.17)  | 0.45 |
| 11-12 | Gp4 | g.chr3:98600510T>A   | Missense Mutation | DCBLD2      | p.I103F  | discoidin, CUB and LC(115 (0.00)    | 17 (0.35)  | 0.94 |
| 11-12 | Gp4 | g.chr4:107956598C>T  | Missense Mutation | DKK2        | p.A51T   | dickkopf WNT signalin,22 (0.00)     | 93 (0.15)  | 0.40 |
| 11-12 | Gp4 | g.chr3:57348553G>T   | Missense Mutation | DNAH12      | p.S2676Y | dynein, axonemal, heav,62 (0.00)    | 57 (0.18)  | 0.47 |
| 11-12 | Gp4 | g.chr17:76568955G>A  | Nonsense Mutation | DNAH17      | p.Q123*  | dynein, axonemal, heav,19 (0.00)    | 41 (0.17)  | 0.59 |

|       |     |                      |                   |          |          |                                              |            |            |      |
|-------|-----|----------------------|-------------------|----------|----------|----------------------------------------------|------------|------------|------|
| 11-12 | Gp4 | g.chr17:11696886G>A  | Missense Mutation | DNAH9    | p.E2710K | dynein, axonemal, heavy chain 1              | 41 (0.00)  | 24 (0.62)  | 1.67 |
| 11-12 | Gp4 | g.chr18:28736056C>A  | Missense Mutation | DSC1     | p.A141S  | desmocollin 1                                | 29 (0.00)  | 28 (0.25)  | 0.67 |
| 11-12 | Gp4 | g.chr11:117301698T>A | Missense Mutation | DSCAML1  | p.E1869V | Down syndrome cell adhesion molecule 1       | 40 (0.03)  | 153 (0.31) | 0.82 |
| 11-12 | Gp4 | g.chr2:25851158C>T   | Missense Mutation | DTNB     | p.E82K   | dystrobrevin, beta                           | 111 (0.00) | 24 (0.33)  | 0.89 |
| 11-12 | Gp4 | g.chr10:131646681G>A | Missense Mutation | EBF3     | p.P368L  | early B-cell factor 3                        | 26 (0.00)  | 53 (0.17)  | 0.61 |
| 11-12 | Gp4 | g.chr2:63092060T>A   | Missense Mutation | EHBP1    | p.Y353N  | EH domain binding protein 1                  | 57 (0.00)  | 42 (0.14)  | 0.38 |
| 11-12 | Gp4 | g.chr19:40030011A>T  | Nonstop Mutation  | EID2     | p.*237K  | EP300 interacting inhibitor 16               | 16 (0.00)  | 35 (0.17)  | 0.61 |
| 11-12 | Gp4 | g.chr19:40030071A>C  | Missense Mutation | EID2     | p.S217A  | EP300 interacting inhibitor 17               | 17 (0.00)  | 36 (0.19)  | 0.69 |
| 11-12 | Gp4 | g.chr21:39811324G>T  | Intron            | ERG      |          | v-ets avian erythroblastosis virus oncogene  | 46 (0.00)  | 56 (0.32)  | 0.86 |
| 11-12 | Gp4 | g.chr2:203560712G>C  | Missense Mutation | FAM117B  | p.S237T  | family with sequence similarity 116          | 116 (0.00) | 16 (0.31)  | 0.83 |
| 11-12 | Gp4 | g.chr4:77192805A>T   | Missense Mutation | FAM47E   | p.T154S  | family with sequence similarity 35           | 35 (0.00)  | 19 (0.26)  | 0.70 |
| 11-12 | Gp4 | g.chr3:125643936C>A  | RNA               | FAM86JP  |          | family with sequence similarity 55           | 55 (0.00)  | 210 (0.11) | 0.39 |
| 11-12 | Gp4 | g.chr8:94713631G>T   | Missense Mutation | FAM92A1  | p.G69V   | family with sequence similarity 86           | 86 (0.00)  | 71 (0.37)  | 0.98 |
| 11-12 | Gp4 | g.chr11:92533562G>T  | Missense Mutation | FAT3     | p.M2311I | FAT atypical cadherin 3                      | 165 (0.00) | 68 (0.29)  | 0.78 |
| 11-12 | Gp4 | g.chr10:5950906C>T   | Silent            | FBXO18   | p.L258L  | F-box protein, helicase, 45                  | 45 (0.00)  | 41 (0.22)  | 0.59 |
| 11-12 | Gp4 | g.chr1:152276516C>A  | Nonsense Mutation | FLG      | p.E3616* | filaggrin                                    | 292 (0.00) | 54 (0.24)  | 0.64 |
| 11-12 | Gp4 | g.chr2:186667617A>G  | Silent            | FSIP2    | p.E4528E | fibrous sheath interacting protein 2         | 76 (0.00)  | 51 (0.16)  | 0.42 |
| 11-12 | Gp4 | g.chr1:78428510C>T   | Missense Mutation | FUBP1    | p.R430H  | far upstream element (F 17)                  | 17 (0.00)  | 28 (0.39)  | 1.05 |
| 11-12 | Gp4 | g.chr20:42891935G>T  | Nonsense Mutation | GDAP1L1  | p.E205*  | ganglioside induced differentiation factor 1 | 244 (0.00) | 160 (0.34) | 0.90 |
| 11-12 | Gp4 | g.chrX:153670993G>A  | Missense Mutation | GDI1     | p.D440N  | GDP dissociation inhibitor 16                | 16 (0.00)  | 25 (0.24)  | 0.48 |
| 11-12 | Gp4 | g.chr17:649564G>T    | Silent            | GEMIN4   | p.G573G  | gem (nuclear organelle)                      | 70 (0.00)  | 58 (0.17)  | 0.46 |
| 11-12 | Gp4 | g.chr5:74021505G>A   | Missense Mutation | GFM2     | p.T663I  | G elongation factor, mitochondrial           | 77 (0.00)  | 18 (0.83)  | 2.22 |
| 11-12 | Gp4 | g.chr3:37337694T>A   | Missense Mutation | GOLGA4   | p.S288R  | golgin A4                                    | 46 (0.00)  | 14 (0.79)  | 2.10 |
| 11-12 | Gp4 | g.chr3:37368502C>T   | Missense Mutation | GOLGA4   | p.P1731S | golgin A4                                    | 221 (0.00) | 59 (0.37)  | 0.99 |
| 11-12 | Gp4 | g.chr7:50671763G>A   | Silent            | GRB10    | p.H492H  | growth factor receptor-b42                   | 42 (0.00)  | 11 (0.73)  | 1.94 |
| 11-12 | Gp4 | g.chr4:94031988A>G   | Missense Mutation | GRID2    | p.M207V  | glutamate receptor, ionotropic, delta 2      | 52 (0.02)  | 13 (0.38)  | 1.03 |
| 11-12 | Gp4 | g.chr9:104448918C>T  | Missense Mutation | GRIN3A   | p.V422M  | glutamate receptor, ionotropic, NR2B         | 88 (0.00)  | 40 (0.30)  | 0.80 |
| 11-12 | Gp4 | g.chr4:106647920C>T  | Missense Mutation | GSTCD    | p.P360L  | glutathione S-transferase, cytosolic, delta  | 92 (0.00)  | 41 (0.41)  | 1.11 |
| 11-12 | Gp4 | g.chr15:28456163C>A  | Nonsense Mutation | HERC2    | p.G2352* | HECT and RLD domain containing protein 2     | 116 (0.00) | 78 (0.14)  | 0.50 |
| 11-12 | Gp4 | g.chr15:28456202G>T  | Missense Mutation | HERC2    | p.L2339M | HECT and RLD domain containing protein 2     | 112 (0.00) | 91 (0.24)  | 0.86 |
| 11-12 | Gp4 | g.chr1:185959502G>T  | Nonsense Mutation | HMCN1    | p.E1102* | hemicentin 1                                 | 151 (0.00) | 10 (0.70)  | 1.87 |
| 11-12 | Gp4 | g.chr5:132425288C>T  | Missense Mutation | HSPA4    | p.P427S  | heat shock 70kDa protein 4                   | 34 (0.00)  | 22 (0.32)  | 0.85 |
| 11-12 | Gp4 | g.chr9:21481214G>A   | Silent            | IFNE     | p.Y160Y  | interferon, epsilon                          | 177 (0.00) | 57 (0.88)  | 2.34 |
| 11-12 | Gp4 | g.chr16:1636139G>A   | Nonsense Mutation | IFT140   | p.Q383*  | intraflagellar transport protein 140         | 137 (0.00) | 72 (0.18)  | 0.48 |
| 11-12 | Gp4 | g.chr14:107083226G>A | RNA               | IGHV4-59 |          | immunoglobulin heavy chain 4                 | 34 (0.00)  | 141 (0.15) | 0.40 |

|       |     |                      |                   |          |          |                                   |             |            |      |
|-------|-----|----------------------|-------------------|----------|----------|-----------------------------------|-------------|------------|------|
| 11-12 | Gp4 | g.chr4:143350024G>C  | Intron            | INPP4B   |          | inositol polyphosphate-48 (0.00)  | 34 (0.71)   | 1.88       |      |
| 11-12 | Gp4 | g.chr4:143366767C>T  | Intron            | INPP4B   |          | inositol polyphosphate-55 (0.00)  | 23 (0.26)   | 0.70       |      |
| 11-12 | Gp4 | g.chr4:143421469C>G  | Intron            | INPP4B   |          | inositol polyphosphate-51 (0.00)  | 13 (0.69)   | 1.85       |      |
| 11-12 | Gp4 | g.chr4:143454394C>T  | Intron            | INPP4B   |          | inositol polyphosphate-153 (0.00) | 62 (0.32)   | 0.86       |      |
| 11-12 | Gp4 | g.chr4:143583460G>A  | Intron            | INPP4B   |          | inositol polyphosphate-206 (0.00) | 93 (0.27)   | 0.72       |      |
| 11-12 | Gp4 | g.chr4:143670004T>C  | Intron            | INPP4B   |          | inositol polyphosphate-150 (0.00) | 26 (0.19)   | 0.51       |      |
| 11-12 | Gp4 | g.chr4:143733370C>T  | Intron            | INPP4B   |          | inositol polyphosphate-145 (0.00) | 37 (0.24)   | 0.65       |      |
| 11-12 | Gp4 | g.chr4:143749506G>A  | Intron            | INPP4B   |          | inositol polyphosphate-37 (0.00)  | 17 (0.29)   | 0.78       |      |
| 11-12 | Gp4 | g.chr12:26553136G>A  | Silent            | ITPR2    | p.C2485C | inositol 1,4,5-trisphosph         | 152 (0.00)  | 54 (0.15)  | 0.40 |
| 11-12 | Gp4 | g.chr10:133930665G>A | Missense Mutation | JAKMIP3  | p.E74K   | Janus kinase and microt           | 20 (0.00)   | 49 (0.16)  | 0.58 |
| 11-12 | Gp4 | g.chr13:45767983G>C  | Silent            | KCTD4    | p.T240T  | potassium channel tetra           | 117 (0.00)  | 21 (0.24)  | 0.63 |
| 11-12 | Gp4 | g.chr4:55972036G>T   | Silent            | KDR      | p.V536V  | kinase insert domain rec          | 91 (0.01)   | 77 (0.17)  | 0.45 |
| 11-12 | Gp4 | g.chr4:123145832G>T  | Splice Site       | KIAA1109 | p.Q931H  | KIAA1109                          | 40 (0.00)   | 15 (0.40)  | 1.07 |
| 11-12 | Gp4 | g.chr10:3826466C>T   | Intron            | KLF6     |          | Kruppel-like factor 6             | 34 (0.00)   | 45 (0.20)  | 0.53 |
| 11-12 | Gp4 | g.chr12:52881645G>T  | Silent            | KRT6A    | p.G518G  | keratin 6A                        | 116 (0.00)  | 17 (0.35)  | 0.94 |
| 11-12 | Gp4 | g.chr13:76379786G>A  | Silent            | LMO7     | p.G129G  | LIM domain 7                      | 264 (0.00)  | 37 (0.76)  | 2.02 |
| 11-12 | Gp4 | g.chr6:160912500C>T  | RNA               | LPAL2    |          | lipoprotein, Lp(a)-like           | 2228 (0.00) | 83 (0.27)  | 0.71 |
| 11-12 | Gp4 | g.chr4:151829939C>T  | Missense Mutation | LRBA     | p.G411E  | LPS-responsive vesicle            | 74 (0.00)   | 16 (0.38)  | 1.00 |
| 11-12 | Gp4 | g.chr12:57572673C>A  | Splice Site       | LRP1     | p.A1536D | low density lipoprotein           | 115 (0.00)  | 55 (0.18)  | 0.48 |
| 11-12 | Gp4 | g.chr11:46916836T>C  | Missense Mutation | LRP4     | p.N397S  | low density lipoprotein           | 160 (0.00)  | 160 (0.15) | 0.40 |
| 11-12 | Gp4 | g.chr17:62892821G>C  | Silent            | LRRC37A3 | p.S185S  | leucine rich repeat conta         | 89 (0.00)   | 32 (0.22)  | 0.58 |
| 11-12 | Gp4 | g.chr1:90152066G>A   | Missense Mutation | LRRC8C   | p.E12K   | leucine rich repeat conta         | 59 (0.00)   | 13 (0.46)  | 1.23 |
| 11-12 | Gp4 | g.chr12:85459053C>T  | Missense Mutation | LRRIQ1   | p.T802I  | leucine-rich repeats and          | 48 (0.00)   | 23 (0.30)  | 0.81 |
| 11-12 | Gp4 | g.chr12:85459094G>A  | Missense Mutation | LRRIQ1   | p.E816K  | leucine-rich repeats and          | 66 (0.00)   | 45 (0.20)  | 0.53 |
| 11-12 | Gp4 | g.chr7:78189297A>G   | Intron            | MAGI2    |          | membrane associated gu            | 46 (0.00)   | 29 (0.41)  | 0.44 |
| 11-12 | Gp4 | g.chr7:78226064T>C   | Intron            | MAGI2    |          | membrane associated gu            | 118 (0.01)  | 21 (0.38)  | 0.40 |
| 11-12 | Gp4 | g.chr7:78340555G>C   | Intron            | MAGI2    |          | membrane associated gu            | 15 (0.00)   | 11 (0.82)  | 0.86 |
| 11-12 | Gp4 | g.chr7:78755317G>T   | Intron            | MAGI2    |          | membrane associated gu            | 117 (0.01)  | 172 (0.52) | 0.55 |
| 11-12 | Gp4 | g.chr7:78755319G>T   | Intron            | MAGI2    |          | membrane associated gu            | 117 (0.01)  | 171 (0.52) | 0.55 |
| 11-12 | Gp4 | g.chr7:78760599G>C   | Intron            | MAGI2    |          | membrane associated gu            | 99 (0.00)   | 17 (0.65)  | 0.68 |
| 11-12 | Gp4 | g.chr7:79002426G>T   | Intron            | MAGI2    |          | membrane associated gu            | 46 (0.00)   | 23 (0.91)  | 0.96 |
| 11-12 | Gp4 | g.chr1:38265350C>A   | Silent            | MANEAL   | p.L283L  | mannosidase, endo-alpha           | 25 (0.00)   | 41 (0.20)  | 0.52 |
| 11-12 | Gp4 | g.chr1:242161870G>T  | Missense Mutation | MAP1LC3C | p.T56N   | microtubule-associated            | 125 (0.00)  | 60 (0.15)  | 0.40 |
| 11-12 | Gp4 | g.chr2:160605015G>T  | Missense Mutation | MARCH7   | p.G367V  | membrane-associated ri            | 36 (0.00)   | 22 (0.50)  | 1.33 |
| 11-12 | Gp4 | g.chr2:149227252C>G  | Silent            | MBD5     | p.L580L  | methyl-CpG binding do             | 155 (0.00)  | 77 (0.34)  | 0.90 |

|       |     |                     |                   |         |          |                                                                               |            |      |
|-------|-----|---------------------|-------------------|---------|----------|-------------------------------------------------------------------------------|------------|------|
| 11-12 | Gp4 | g.chr6:90357858C>A  | Nonsense Mutation | MDN1    | p.E5430* | MDN1, midasin homolog 101 (0.00)                                              | 41 (0.22)  | 0.59 |
| 11-12 | Gp4 | g.chr3:151112534T>C | Missense Mutation | MED12L  | p.M1865T | mediator complex subunit 41 (0.00)                                            | 35 (0.37)  | 0.99 |
| 11-12 | Gp4 | g.chr15:42041983C>T | Nonsense Mutation | MGA     | p.Q2060* | MGA, MAX dimerization factor 1 (0.00)                                         | 32 (0.47)  | 1.25 |
| 11-12 | Gp4 | g.chr10:99236671C>T | Missense Mutation | MMS19   | p.M181I  | MMS19 nucleotide excision repair factor 102 (0.00)                            | 69 (0.58)  | 1.55 |
| 11-12 | Gp4 | g.chr7:42974701G>T  | Missense Mutation | MRPL32  | p.R93M   | mitochondrial ribosomal protein L32 67 (0.00)                                 | 62 (0.23)  | 0.60 |
| 11-12 | Gp4 | g.chr2:55490951T>A  | Missense Mutation | MTIF2   | p.H15L   | mitochondrial translation factor 187 (0.00)                                   | 41 (0.22)  | 0.59 |
| 11-12 | Gp4 | g.chr11:68480777C>A | Missense Mutation | MTL5    | p.R373S  | metallothionein-like 5, type 95 (0.00)                                        | 95 (0.22)  | 0.59 |
| 11-12 | Gp4 | g.chr7:100646863C>A | Missense Mutation | MUC12   | p.P4483H | mucin 12, cell surface associated 463 (0.00)                                  | 51 (0.25)  | 0.68 |
| 11-12 | Gp4 | g.chr11:1093412C>T  | Missense Mutation | MUC2    | p.T1744M | mucin 2, oligomeric mucin-like 15 (0.00)                                      | 30 (0.43)  | 1.16 |
| 11-12 | Gp4 | g.chr1:201780824A>G | Missense Mutation | NAV1    | p.S1584G | neuron navigator 1 63 (0.00)                                                  | 57 (0.18)  | 0.47 |
| 11-12 | Gp4 | g.chr18:56056319G>T | Missense Mutation | NEDD4L  | p.L746F  | neural precursor cell expressed, highly variable 21 (0.00)                    | 15 (0.60)  | 1.60 |
| 11-12 | Gp4 | g.chr12:55420282G>T | Missense Mutation | NEUROD4 | p.W20L   | neuronal differentiation factor 17 (0.00)                                     | 20 (0.40)  | 1.07 |
| 11-12 | Gp4 | g.chr17:29548914C>A | Missense Mutation | NF1     | p.P563H  | neurofibromin 1 58 (0.00)                                                     | 38 (0.16)  | 0.42 |
| 11-12 | Gp4 | g.chr1:52257270C>T  | Silent            | NRD1    | p.G1048G | nardilysin (N-arginine dipeptidase) 41 (0.00)                                 | 38 (0.24)  | 0.63 |
| 11-12 | Gp4 | g.chr11:9007322G>A  | Silent            | NRIP3   | p.G166G  | nuclear receptor interacting protein 71 (0.00)                                | 68 (0.15)  | 0.39 |
| 11-12 | Gp4 | g.chr7:72718745C>A  | Splice Site       | NSUN5   | p.G252W  | NOP2/Sun domain family class 2 member 5 42 (0.00)                             | 64 (0.16)  | 0.42 |
| 11-12 | Gp4 | g.chr1:228482047G>A | Missense Mutation | OBSCN   | p.V4205M | obscurin, cytoskeletal calcium-binding protein 91 (0.00)                      | 151 (0.24) | 0.64 |
| 11-12 | Gp4 | g.chr11:6867664C>A  | Missense Mutation | OR10A5  | p.L251I  | olfactory receptor, family 10A subfamily 5 member 102 (0.00)                  | 33 (0.24)  | 0.65 |
| 11-12 | Gp4 | g.chr12:56030691C>T | Missense Mutation | OR10P1  | p.H6Y    | olfactory receptor, family 10P subfamily 1 member 89 (0.00)                   | 15 (0.40)  | 1.07 |
| 11-12 | Gp4 | g.chr11:57971419G>C | Missense Mutation | OR1S2   | p.L79V   | olfactory receptor, family 1S subfamily 2 member 86 (0.00)                    | 45 (0.24)  | 0.65 |
| 11-12 | Gp4 | g.chr11:55110767C>A | Missense Mutation | OR4A16  | p.L31I   | olfactory receptor, family 4A subfamily 16 member 73 (0.00)                   | 33 (0.33)  | 0.89 |
| 11-12 | Gp4 | g.chr11:4842807C>T  | Silent            | OR51F2  | p.L64L   | olfactory receptor, family 51F subfamily 2 member 84 (0.00)                   | 17 (0.41)  | 1.10 |
| 11-12 | Gp4 | g.chr3:98188600C>T  | Silent            | OR5K1   | p.Y60Y   | olfactory receptor, family 5K subfamily 1 member 89 (0.01)                    | 40 (0.20)  | 0.53 |
| 11-12 | Gp4 | g.chr7:142750000C>T | Missense Mutation | OR6V1   | p.S188F  | olfactory receptor, family 6V subfamily 1 member 248 (0.00)                   | 49 (0.35)  | 0.93 |
| 11-12 | Gp4 | g.chr12:80633149C>T | Missense Mutation | OTOGL   | p.P319S  | otogelin-like 95 (0.00)                                                       | 54 (0.20)  | 0.54 |
| 11-12 | Gp4 | g.chr14:94510374G>A | Silent            | OTUB2   | p.E92E   | OTU deubiquitinase, ubiquitin-specific 37 (0.00)                              | 57 (0.28)  | 0.75 |
| 11-12 | Gp4 | g.chr12:29639264G>A | Missense Mutation | OVCH1   | p.P304S  | ovochoymase 1 42 (0.00)                                                       | 56 (0.93)  | 2.48 |
| 11-12 | Gp4 | g.chr21:47847547C>A | Silent            | PCNT    | p.T2444T | pericentrin 19 (0.00)                                                         | 27 (0.19)  | 0.72 |
| 11-12 | Gp4 | g.chr9:78686726G>A  | Missense Mutation | PCSK5   | p.S269N  | proprotein convertase subtilisin/kexin type 5 family class 5 member 77 (0.00) | 11 (0.45)  | 1.21 |
| 11-12 | Gp4 | g.chr15:44048957G>A | Silent            | PDIA3   | p.R119R  | protein disulfide isomerase family A class 3 member 22 (0.00)                 | 32 (0.16)  | 0.42 |
| 11-12 | Gp4 | g.chr2:10928887C>T  | Missense Mutation | PDIA6   | p.G364S  | protein disulfide isomerase family A class 6 member 104 (0.00)                | 89 (0.51)  | 1.35 |
| 11-12 | Gp4 | g.chr2:197784751G>A | Missense Mutation | PGAP1   | p.L49F   | post-GPI attachment to protein 19 (0.00)                                      | 15 (0.87)  | 2.31 |
| 11-12 | Gp4 | g.chr12:9070313G>C  | Missense Mutation | PHC1    | p.G14R   | polyhomeotic homolog 18 (0.00)                                                | 22 (0.41)  | 1.09 |
| 11-12 | Gp4 | g.chr18:60432561C>T | Intron            | PHLPP1  |          | PH domain and leucine-rich repeat domain 183 (0.00)                           | 241 (0.14) | 0.38 |
| 11-12 | Gp4 | g.chr18:60469622C>A | Intron            | PHLPP1  |          | PH domain and leucine-rich repeat domain 159 (0.00)                           | 55 (0.56)  | 1.50 |

|       |     |                     |                   |                     |          |                                     |            |            |      |
|-------|-----|---------------------|-------------------|---------------------|----------|-------------------------------------|------------|------------|------|
| 11-12 | Gp4 | g.chr18:60642746G>A | Missense Mutation | PHLPP1              | p.C1291Y | PH domain and leucine: 134 (0.00)   | 26 (0.27)  | 0.72       |      |
| 11-12 | Gp4 | g.chr17:26881394G>C | Missense Mutation | PIGS                | p.D504E  | phosphatidylinositol gly 93 (0.00)  | 51 (0.20)  | 0.52       |      |
| 11-12 | Gp4 | g.chr17:26881477C>T | Missense Mutation | PIGS                | p.E477K  | phosphatidylinositol gly 94 (0.00)  | 20 (0.25)  | 0.67       |      |
| 11-12 | Gp4 | g.chr2:219136108T>A | Silent            | PNKD                | p.I24I   | paroxysmal nonkinesige 59 (0.00)    | 99 (0.42)  | 1.13       |      |
| 11-12 | Gp4 | g.chr1:151381170C>A | Splice Site       | POGZ                | p.K678N  | pogo transposable elemε 107 (0.00)  | 15 (0.53)  | 1.42       |      |
| 11-12 | Gp4 | g.chr2:130832590T>G | Missense Mutation | POTEF               | p.M819L  | POTE ankyrin domain f 122 (0.00)    | 175 (0.14) | 0.56       |      |
| 11-12 | Gp4 | g.chr1:143767732C>A | Silent            | PPIAL4G             | p.L39L   | peptidylprolyl isomerase 105 (0.01) | 30 (0.23)  | 0.62       |      |
| 11-12 | Gp4 | g.chr16:4935946C>T  | Missense Mutation | PPL                 | p.E904K  | periplakin 23 (0.00)                | 70 (0.16)  | 0.42       |      |
| 11-12 | Gp4 | g.chr4:7435469C>A   | Missense Mutation | PSAPL1              | p.A380S  | prosaposin-like 1 (gene/ 38 (0.00)  | 117 (0.11) | 0.39       |      |
| 11-12 | Gp4 | g.chr19:43773572G>T | Silent            | PSG9                | p.L4L    | pregnancy specific beta-86 (0.00)   | 50 (0.44)  | 1.17       |      |
| 11-12 | Gp4 | g.chr17:38153599C>A | Missense Mutation | PSMD3               | p.P498H  | proteasome (prosome, n 31 (0.00)    | 30 (0.50)  | 1.33       |      |
| 11-12 | Gp4 | g.chr1:32374508C>T  | Missense Mutation | PTP4A2              | p.R150Q  | protein tyrosine phosphε 133 (0.00) | 23 (0.35)  | 0.93       |      |
| 11-12 | Gp4 | g.chr1:214557833C>A | Silent            | PTPN14              | p.G455G  | protein tyrosine phosphε 77 (0.00)  | 66 (0.18)  | 0.48       |      |
| 11-12 | Gp4 | g.chr12:70953228C>T | Missense Mutation | PTPRB               | p.V1449M | protein tyrosine phosphε 89 (0.00)  | 15 (0.60)  | 1.60       |      |
| 11-12 | Gp4 | g.chr12:44124356C>T | Silent            | PUS7L               | p.Q643Q  | pseudouridylate synthase 88 (0.00)  | 47 (0.28)  | 0.74       |      |
| 11-12 | Gp4 | g.chr3:49095284C>A  | Missense Mutation | QRICH1              | p.A117S  | glutamine-rich 1 35 (0.00)          | 75 (0.15)  | 0.39       |      |
| 11-12 | Gp4 | g.chr10:99995800G>T | Missense Mutation | R3HCC1L             | p.K716N  | R3H domain and coiled-22 (0.00)     | 11 (0.82)  | 2.18       |      |
| 11-12 | Gp4 | g.chr13:48892501C>A | Intron            | RB1                 |          | retinoblastoma 1 16 (0.00)          | 119 (0.22) | 0.58       |      |
| 11-12 | Gp4 | g.chr13:49028602C>G | Intron            | RB1                 |          | retinoblastoma 1 76 (0.00)          | 47 (0.23)  | 0.62       |      |
| 11-12 | Gp4 | g.chr20:34317279C>T | Missense Mutation | RBM39               | p.R124H  | RNA binding motif prot 100 (0.00)   | 46 (0.63)  | 1.68       |      |
| 11-12 | Gp4 | g.chr6:111672900G>A | Missense Mutation | REV3L               | p.R2427W | REV3-like, polymerase 86 (0.00)     | 35 (0.17)  | 0.46       |      |
| 11-12 | Gp4 | g.chr16:74657849C>T | Missense Mutation | RFWD3               | p.V768I  | ring finger and WD repe 37 (0.00)   | 19 (0.47)  | 0.56       |      |
| 11-12 | Gp4 | g.chr3:129249773T>C | Missense Mutation | RHO                 | p.V139A  | rhodopsin 18 (0.00)                 | 67 (0.39)  | 1.03       |      |
| 11-12 | Gp4 | g.chr6:3085500C>G   | Missense Mutation | RIPK1               | p.I232M  | receptor (TNFRSF)-inte 54 (0.00)    | 13 (0.85)  | 2.26       |      |
| 11-12 | Gp4 | g.chr6:3085559T>A   | Missense Mutation | RIPK1               | p.I252N  | receptor (TNFRSF)-inte 57 (0.00)    | 25 (0.28)  | 0.75       |      |
| 11-12 | Gp4 | g.chr1:51735739C>A  | Missense Mutation | RNF11               | p.H79N   | ring finger protein 11 19 (0.00)    | 11 (0.73)  | 1.94       |      |
| 11-12 | Gp4 | g.chr6:42130833G>T  | Missense Mutation | RP1-139D8.6         | p.G77C   |                                     | 20 (0.00)  | 26 (0.19)  | 0.51 |
| 11-12 | Gp4 | g.chr5:177398785G>A | RNA               | RP11-1252I4.2       |          |                                     | 219 (0.00) | 224 (0.12) | 0.44 |
| 11-12 | Gp4 | g.chr9:41963928T>A  | lincRNA           | RP11-204M4.2        |          |                                     | 195 (0.00) | 50 (0.26)  | 0.69 |
| 11-12 | Gp4 | g.chr13:52845561A>G | RNA               | RP11-248G5.8        |          |                                     | 35 (0.00)  | 20 (0.30)  | 0.80 |
| 11-12 | Gp4 | g.chr14:19407833C>T | lincRNA           | RP11-536C10.7       |          |                                     | 81 (0.00)  | 25 (0.28)  | 0.75 |
| 11-12 | Gp4 | g.chr14:20146539C>T | lincRNA           | RP11-597A11.6       |          |                                     | 96 (0.00)  | 138 (0.23) | 0.62 |
| 11-12 | Gp4 | g.chr14:20146580T>C | lincRNA           | RP11-597A11.6       |          |                                     | 82 (0.00)  | 104 (0.25) | 0.67 |
| 11-12 | Gp4 | g.chr1:143161427G>T | lincRNA           | RP11-782C8.4        |          |                                     | 48 (0.00)  | 23 (0.26)  | 0.70 |
| 11-12 | Gp4 | g.chr12:53928375A>G | Silent            | RP11-793H13.p.P157P |          |                                     | 78 (0.00)  | 48 (0.23)  | 0.61 |



|       |     |                     |                   |                  |           |                            |            |            |      |
|-------|-----|---------------------|-------------------|------------------|-----------|----------------------------|------------|------------|------|
| 11-12 | Gp4 | g.chr20:21147019T>C | RNA               | RP4-777D9.2      |           |                            | 71 (0.00)  | 13 (0.92)  | 2.46 |
| 11-12 | Gp4 | g.chr6:107076659C>T | Missense Mutation | RTN4IP1          | p.A80T    | reticulon 4 interacting p  | 58 (0.00)  | 51 (0.16)  | 0.42 |
| 11-12 | Gp4 | g.chr3:72487398G>A  | Intron            | RYBP             |           | RING1 and YY1 bindin       | 120 (0.00) | 29 (0.31)  | 0.83 |
| 11-12 | Gp4 | g.chr1:237660043C>T | Missense Mutation | RYR2             | p.L732F   | ryanodine receptor 2 (ca   | 190 (0.00) | 198 (0.23) | 0.61 |
| 11-12 | Gp4 | g.chr3:169644401G>T | Missense Mutation | SAMD7            | p.K117N   | sterile alpha motif doma   | 41 (0.02)  | 10 (0.80)  | 2.13 |
| 11-12 | Gp4 | g.chr16:30974809G>T | Missense Mutation | SETD1A           | p.Q191H   | SET domain containing      | 24 (0.00)  | 35 (0.14)  | 0.38 |
| 11-12 | Gp4 | g.chr3:9488945C>A   | Missense Mutation | SETD5            | p.T579N   | SET domain containing      | 101 (0.00) | 29 (0.17)  | 0.46 |
| 11-12 | Gp4 | g.chr1:154473937C>A | Missense Mutation | SHE              | p.G189V   | Src homology 2 domain      | 70 (0.00)  | 162 (0.19) | 0.49 |
| 11-12 | Gp4 | g.chr2:196599724G>A | Missense Mutation | SLC39A10         | p.A819T   | solute carrier family 39   | 52 (0.00)  | 56 (0.18)  | 0.48 |
| 11-12 | Gp4 | g.chr2:162813690T>C | Silent            | SLC4A10          | p.V911V   | solute carrier family 4, s | 29 (0.00)  | 29 (0.86)  | 2.30 |
| 11-12 | Gp4 | g.chr2:27888076C>T  | Missense Mutation | SLC4A1AP         | p.S312L   | solute carrier family 4 (ε | 27 (0.00)  | 24 (0.33)  | 0.89 |
| 11-12 | Gp4 | g.chr6:169051392G>T | Silent            | SMOC2            | p.L313L   | SPARC related modular      | 42 (0.00)  | 42 (0.14)  | 0.56 |
| 11-12 | Gp4 | g.chr18:8818964C>T  | Nonsense Mutation | SOGA2            | p.Q1274*  |                            | 36 (0.03)  | 33 (0.33)  | 0.89 |
| 11-12 | Gp4 | g.chr5:35692811G>T  | Missense Mutation | SPEF2            | p.E628D   | sperm flagellar 2          | 167 (0.01) | 27 (0.22)  | 0.59 |
| 11-12 | Gp4 | g.chr1:158596702C>T | Nonsense Mutation | SPTA1            | p.W1920*  | spectrin, alpha, erythro   | 73 (0.00)  | 12 (0.50)  | 1.33 |
| 11-12 | Gp4 | g.chr15:43900146G>A | Missense Mutation | STRC             | p.R1237W  | stereocilin                | 206 (0.00) | 55 (0.49)  | 1.31 |
| 11-12 | Gp4 | g.chr12:65268859A>G | Missense Mutation | TBC1D30          | p.K526R   | TBC1 domain family, n      | 82 (0.00)  | 76 (0.26)  | 0.70 |
| 11-12 | Gp4 | g.chr17:58087945C>T | lincRNA           | TBC1D3P1-DHX40P1 |           | TBC1D3P1-DHX40P1           | 185 (0.00) | 219 (0.19) | 0.50 |
| 11-12 | Gp4 | g.chr6:170871248C>A | Missense Mutation | TBP              | p.P142T   | TATA box binding prot      | 17 (0.00)  | 29 (0.17)  | 0.68 |
| 11-12 | Gp4 | g.chrX:13681103C>A  | Missense Mutation | TCEANC           | p.T159N   | transcription elongation   | 72 (0.00)  | 13 (0.62)  | 1.03 |
| 11-12 | Gp4 | g.chr6:167791521G>A | Silent            | TCP10            | p.P113P   | t-complex 10               | 63 (0.00)  | 129 (0.18) | 0.59 |
| 11-12 | Gp4 | g.chr14:24659660G>A | Silent            | TM9SF1           | p.A660A   | transmembrane 9 superf     | 42 (0.00)  | 36 (0.31)  | 0.81 |
| 11-12 | Gp4 | g.chr3:189582029T>C | Silent            | TP63             | p.T102T   | tumor protein p63          | 111 (0.00) | 31 (0.29)  | 0.77 |
| 11-12 | Gp4 | g.chr17:18638278C>T | Silent            | TRIM16L          | p.P184P   | tripartite motif containir | 78 (0.00)  | 23 (0.48)  | 1.28 |
| 11-12 | Gp4 | g.chr15:45052007G>A | Missense Mutation | TRIM69           | p.G300S   | tripartite motif containir | 68 (0.00)  | 62 (0.21)  | 0.56 |
| 11-12 | Gp4 | g.chr5:14359549C>G  | Missense Mutation | TRIO             | p.A767G   | trio Rho guanine nucleo    | 20 (0.00)  | 50 (0.16)  | 0.43 |
| 11-12 | Gp4 | g.chr1:100606063A>G | Missense Mutation | TRMT13           | p.K165R   | tRNA methyltransferase     | 73 (0.00)  | 22 (0.50)  | 1.33 |
| 11-12 | Gp4 | g.chr2:179402418G>A | Silent            | TTN              | p.T33172T | titin                      | 135 (0.00) | 115 (0.18) | 0.49 |
| 11-12 | Gp4 | g.chr2:179413752G>A | Silent            | TTN              | p.D30867D | titin                      | 77 (0.00)  | 16 (0.88)  | 2.33 |
| 11-12 | Gp4 | g.chr2:179436470C>T | Missense Mutation | TTN              | p.A24797T | titin                      | 190 (0.00) | 47 (0.23)  | 0.62 |
| 11-12 | Gp4 | g.chr2:179480188C>T | Missense Mutation | TTN              | p.V16162I | titin                      | 198 (0.00) | 30 (0.17)  | 0.44 |
| 11-12 | Gp4 | g.chr2:179606185C>G | Silent            | TTN              | p.V3925V  | titin                      | 61 (0.00)  | 19 (0.95)  | 2.53 |
| 11-12 | Gp4 | g.chr2:179640694C>A | Missense Mutation | TTN              | p.R1966I  | titin                      | 99 (0.00)  | 17 (0.35)  | 0.94 |
| 11-12 | Gp4 | g.chr7:72159764G>A  | RNA               | TYW1B            |           | tRNA-yW synthesizing       | 48 (0.00)  | 31 (0.87)  | 2.32 |
| 11-12 | Gp4 | g.chr21:46191295C>A | Silent            | UBE2G2           | p.L165L   | ubiquitin-conjugating er   | 113 (0.00) | 45 (0.29)  | 1.13 |

|       |     |                      |                   |          |          |                                    |            |            |      |
|-------|-----|----------------------|-------------------|----------|----------|------------------------------------|------------|------------|------|
| 11-12 | Gp4 | g.chr17:73832111C>T  | Nonsense Mutation | UNC13D   | p.W509*  | unc-13 homolog D (C. e40 (0.00)    | 111 (0.16) | 0.43       |      |
| 11-12 | Gp4 | g.chr1:229772343G>T  | Missense Mutation | URB2     | p.K661N  | URB2 ribosome biogenε207 (0.00)    | 61 (0.21)  | 0.57       |      |
| 11-12 | Gp4 | g.chr1:12423165C>G   | Missense Mutation | VPS13D   | p.P3437R | vacuolar protein sorting 72 (0.00) | 61 (0.25)  | 0.66       |      |
| 11-12 | Gp4 | g.chr1:168511308C>A  | Silent            | XCL2     | p.V33V   | chemokine (C motif) lig23 (0.00)   | 13 (0.69)  | 1.85       |      |
| 11-12 | Gp4 | g.chr9:129641959G>A  | Missense Mutation | ZBTB34   | p.G94E   | zinc finger and BTB doε251 (0.00)  | 59 (0.47)  | 1.27       |      |
| 11-12 | Gp4 | g.chr5:79738964G>A   | Missense Mutation | ZFYVE16  | p.M814I  | zinc finger, FYVE domε27 (0.00)    | 15 (0.67)  | 1.78       |      |
| 11-12 | Gp4 | g.chr10:267216C>T    | Missense Mutation | ZMYND11  | p.R120C  | zinc finger, MYND-typε84 (0.00)    | 50 (0.64)  | 2.44       |      |
| 11-12 | Gp4 | g.chr6:87943144C>A   | Missense Mutation | ZNF292   | p.L214M  | zinc finger protein 292 87 (0.00)  | 32 (0.25)  | 0.67       |      |
| 11-12 | Gp4 | g.chr19:53345377G>A  | Missense Mutation | ZNF468   | p.T57M   | zinc finger protein 468 118 (0.00) | 24 (0.62)  | 1.67       |      |
| 11-12 | Gp4 | g.chr19:40542003C>T  | Missense Mutation | ZNF780B  | p.G107R  | zinc finger protein 780B41 (0.00)  | 107 (0.16) | 0.56       |      |
| 11-12 | Gp4 | g.chr19:52568452G>A  | Missense Mutation | ZNF841   | p.H895Y  | zinc finger protein 841 76 (0.00)  | 65 (0.18)  | 0.49       |      |
| 11-12 | Gp4 | g.chr19:9874035C>A   | Missense Mutation | ZNF846   | p.W22L   | zinc finger protein 846 180 (0.00) | 25 (0.20)  | 0.53       |      |
| 11-12 | Gp4 | g.chr9:115759765G>A  | lincRNA           | ZNF883   |          | zinc finger protein 883 69 (0.00)  | 38 (0.39)  | 1.05       |      |
| 11-13 | Gp3 | g.chr12:7273117C>T   | RNA               | C1RL-AS1 |          | C1RL antisense RNA 1 102 (0.00)    | 90 (0.92)  | 0.61       |      |
| 11-13 | Gp3 | g.chr8:68084765T>C   | Silent            | CSPP1    | p.H976H  | centrosome and spindle 42 (0.00)   | 180 (0.11) | 0.38       |      |
| 11-13 | Gp3 | g.chr7:18710691C>A   | Intron            | HDAC9    |          | histone deacetylase 9 57 (0.02)    | 201 (0.59) | 1.58       |      |
| 11-13 | Gp3 | g.chr19:55247464G>A  | Silent            | KIR3DL3  | p.E378E  | killer cell immunoglobulε60 (0.02) | 18 (0.89)  | 0.99       |      |
| 11-13 | Gp3 | g.chr4:25005261A>G   | Missense Mutation | LGI2     | p.Y484H  | leucine-rich repeat LGI 89 (0.00)  | 116 (0.16) | 0.57       |      |
| 11-13 | Gp3 | g.chr2:50692626G>T   | Missense Mutation | NRXN1    | p.S1146R | neurexin 1 82 (0.01)               | 43 (0.95)  | 2.54       |      |
| 11-13 | Gp3 | g.chr13:111176372C>A | Silent            | RAB20    | p.V115V  | RAB20, member RAS cε29 (0.00)      | 432 (0.15) | 0.56       |      |
| 11-13 | Gp3 | g.chr1:36755226C>A   | Missense Mutation | THRAP3   | p.P536T  | thyroid hormone receptε39 (0.03)   | 28 (0.43)  | 1.14       |      |
| 11-13 | Gp3 | g.chr4:38829681G>T   | Missense Mutation | TLR6     | p.L472M  | toll-like receptor 6 175 (0.01)    | 242 (0.43) | 1.59       |      |
| 11-13 | Gp3 | g.chr8:7215553G>A    | Missense Mutation | ZNF705G  | p.P283L  | zinc finger protein 705C315 (0.00) | 29 (0.52)  | 1.38       |      |
| 11-13 | Gp4 | g.chr15:89400810C>G  | Missense Mutation | ACAN     | p.T1665R | aggrecan 53 (0.02)                 | 80 (0.99)  | 2.63       |      |
| 11-13 | Gp4 | g.chr10:24873972G>A  | Missense Mutation | ARHGAP21 | p.P1749L | Rho GTPase activating jε45 (0.00)  | 54 (0.91)  | 2.42       |      |
| 11-13 | Gp4 | g.chr2:237150026C>A  | Missense Mutation | ASB18    | p.K75N   | ankyrin repeat and SOC 48 (0.00)   | 36 (0.61)  | 1.63       |      |
| 11-13 | Gp4 | g.chr6:26459823G>T   | Missense Mutation | BTN2A1   | p.W66L   | butyrophilin, subfamily 35 (0.00)  | 652 (0.35) | 0.92       |      |
| 11-13 | Gp4 | g.chr16:57490454G>A  | Silent            | COQ9     | p.G139G  | coenzyme Q9 115 (0.00)             | 89 (0.75)  | 2.01       |      |
| 11-13 | Gp4 | g.chr7:140301370G>A  | Silent            | DENND2A  | p.A276A  | DENN/MADD domain ε21 (0.00)        | 19 (0.84)  | 2.25       |      |
| 11-13 | Gp4 | g.chr2:175337764C>T  | Silent            | GPR155   | p.T263T  | G protein-coupled recepε50 (0.00)  | 107 (0.95) | 2.54       |      |
| 11-13 | Gp4 | g.chr11:125769447C>T | Missense Mutation | HYLS1    | p.P62S   | hydrolethalus syndrome 70 (0.00)   | 57 (0.98)  | 2.62       |      |
| 11-13 | Gp4 | g.chr17:73016746G>T  | Missense Mutation | ICT1     | p.R177I  | immature colon carcinoε15 (0.00)   | 17 (0.71)  | 1.88       |      |
| 11-13 | Gp4 | g.chr6:84865049G>T   | Missense Mutation | KIAA1009 | p.R988S  |                                    | 49 (0.00)  | 225 (0.89) | 2.37 |
| 11-13 | Gp4 | g.chr17:66040044C>T  | Missense Mutation | KPNA2    | p.P341S  | karyopherin alpha 2 (Rε259 (0.00)  | 77 (0.17)  | 0.45       |      |
| 11-13 | Gp4 | g.chr17:10546157C>T  | Missense Mutation | MYH3     | p.E523K  | myosin, heavy chain 3, ε100 (0.00) | 36 (0.97)  | 2.59       |      |

|       |     |                     |                   |               |          |                           |            |            |      |
|-------|-----|---------------------|-------------------|---------------|----------|---------------------------|------------|------------|------|
| 11-13 | Gp4 | g.chr17:10546168G>T | Missense Mutation | MYH3          | p.A519D  | myosin, heavy chain 3, s  | 104 (0.01) | 38 (0.97)  | 2.60 |
| 11-13 | Gp4 | g.chr10:69934028T>C | Missense Mutation | MYPN          | p.F727L  | myopalladin               | 90 (0.01)  | 260 (0.15) | 0.41 |
| 11-13 | Gp4 | g.chr1:16893795T>A  | Silent            | NBPF1         | p.S906S  | neuroblastoma breakpoi    | 601 (0.00) | 306 (0.65) | 1.73 |
| 11-13 | Gp4 | g.chr12:70953257T>A | Missense Mutation | PTPRB         | p.Y1439F | protein tyrosine phosph   | 108 (0.00) | 194 (0.47) | 1.25 |
| 11-13 | Gp4 | g.chr18:110336C>G   | RNA               | ROCK1P1       |          | Rho-associated, coiled-c  | 75 (0.01)  | 34 (0.35)  | 0.94 |
| 11-13 | Gp4 | g.chr9:17083631G>C  | lincRNA           | RP11-132E11.2 |          |                           | 15 (0.00)  | 10 (0.70)  | 1.87 |
| 11-13 | Gp4 | g.chr1:142621035G>A | lincRNA           | RP11-417J8.6  |          |                           | 50 (0.00)  | 15 (0.33)  | 0.89 |
| 11-13 | Gp4 | g.chr6:42913585C>A  | RNA               | RP3-475N16.1  |          |                           | 18 (0.00)  | 43 (0.37)  | 0.99 |
| 11-13 | Gp4 | g.chr18:6462852C>A  | RNA               | RPL6P27       |          | ribosomal protein L6 ps   | 79 (0.00)  | 22 (0.95)  | 2.55 |
| 11-13 | Gp4 | g.chr15:25432762C>G | RNA               | SNHG14        |          | small nucleolar RNA ho    | 218 (0.00) | 834 (0.15) | 0.39 |
| 11-13 | Gp4 | g.chr17:19091467T>C | lincRNA           | SNORD3A       |          | small nucleolar RNA, C    | 162 (0.01) | 49 (0.73)  | 1.96 |
| 11-13 | Gp4 | g.chr16:29376111A>G | RNA               | SNX29P2       |          | sorting nexin 29 pseudo   | 72 (0.00)  | 26 (0.31)  | 0.82 |
| 11-13 | Gp4 | g.chr8:9622291T>C   | Silent            | TNKS          | p.N909N  | tankyrase, TRF1-interac   | 57 (0.02)  | 149 (0.18) | 0.48 |
| 11-13 | Gp4 | g.chr8:72964928C>A  | Missense Mutation | TRPA1         | p.D573Y  | transient receptor potent | 96 (0.00)  | 757 (0.21) | 0.55 |
| 11-13 | Gp4 | g.chr10:31784716G>A | Missense Mutation | ZEB1          | p.G90R   | zinc finger E-box bindin  | 194 (0.00) | 148 (0.61) | 1.64 |
| 11-13 | Gp4 | g.chr20:57829251C>A | Missense Mutation | ZNF831        | p.S1496Y | zinc finger protein 831   | 25 (0.00)  | 16 (0.56)  | 1.50 |
| 11-14 | Gp3 | g.chr7:48427505T>A  | Missense Mutation | ABCA13        | p.Y3808N | ATP-binding cassette, s   | 21 (0.00)  | 33 (0.85)  | 2.90 |
| 11-14 | Gp3 | g.chr19:1046345C>A  | Missense Mutation | ABCA7         | p.A383D  | ATP-binding cassette, s   | 28 (0.00)  | 113 (0.52) | 1.39 |
| 11-14 | Gp3 | g.chr11:17418743G>T | Missense Mutation | ABCC8         | p.L1329M | ATP-binding cassette, s   | 18 (0.00)  | 121 (0.32) | 0.86 |
| 11-14 | Gp3 | g.chr19:52102076G>A | RNA               | AC018755.16   |          |                           | 27 (0.00)  | 38 (0.21)  | 0.56 |
| 11-14 | Gp3 | g.chr17:20516326C>T | lincRNA           | AC087499.10   |          |                           | 34 (0.00)  | 24 (0.96)  | 2.56 |
| 11-14 | Gp3 | g.chr2:238341719C>T | lincRNA           | AC112721.2    |          |                           | 33 (0.00)  | 32 (0.25)  | 0.67 |
| 11-14 | Gp3 | g.chr3:128598582C>A | Silent            | ACAD9         | p.A16A   | acyl-CoA dehydrogenas     | 57 (0.00)  | 325 (0.13) | 0.43 |
| 11-14 | Gp3 | g.chr11:47264605G>A | Missense Mutation | ACP2          | p.S246F  | acid phosphatase 2, lyso  | 74 (0.01)  | 211 (0.50) | 1.33 |
| 11-14 | Gp3 | g.chr1:2938907G>C   | Missense Mutation | ACTRT2        | p.K219N  | actin-related protein T2  | 29 (0.00)  | 44 (0.16)  | 0.42 |
| 11-14 | Gp3 | g.chr19:8651745C>A  | Missense Mutation | ADAMTS10      | p.V732F  | ADAM metallopeptidas      | 30 (0.00)  | 70 (0.96)  | 2.55 |
| 11-14 | Gp3 | g.chr19:8661067A>G  | Silent            | ADAMTS10      | p.C409C  | ADAM metallopeptidas      | 56 (0.00)  | 139 (0.20) | 0.54 |
| 11-14 | Gp3 | g.chr9:136412171G>C | Missense Mutation | ADAMTSL2      | p.E259Q  | ADAMTS-like 2             | 84 (0.00)  | 390 (0.46) | 1.22 |
| 11-14 | Gp3 | g.chr19:41206213A>G | Splice Site       | ADCK4         |          | aarF domain containing    | 23 (0.00)  | 108 (0.37) | 0.99 |
| 11-14 | Gp3 | g.chr5:7698384A>G   | Missense Mutation | ADCY2         | p.I336V  | adenylate cyclase 2 (bra  | 31 (0.00)  | 10 (0.80)  | 2.13 |
| 11-14 | Gp3 | g.chr16:50340969G>T | Silent            | ADCY7         | p.L587L  | adenylate cyclase 7       | 18 (0.00)  | 68 (0.15)  | 0.39 |
| 11-14 | Gp3 | g.chr1:203134555G>T | Nonsense Mutation | ADORA1        | p.E170*  | adenosine A1 receptor     | 27 (0.00)  | 127 (0.35) | 0.92 |
| 11-14 | Gp3 | g.chr7:44151156C>A  | Missense Mutation | AEBP1         | p.S589R  | AE binding protein 1      | 21 (0.00)  | 43 (0.88)  | 3.02 |
| 11-14 | Gp3 | g.chr4:88035935C>G  | Silent            | AFF1          | p.P643P  | AF4/FMR2 family, men      | 18 (0.00)  | 38 (0.50)  | 1.33 |
| 11-14 | Gp3 | g.chr21:45400956C>T | Silent            | AGPAT3        | p.N310N  | 1-acylglycerol-3-phosph   | 35 (0.00)  | 24 (0.21)  | 0.56 |

|       |     |                      |                   |            |          |                                      |            |      |
|-------|-----|----------------------|-------------------|------------|----------|--------------------------------------|------------|------|
| 11-14 | Gp3 | g.chr16:67516954A>G  | Silent            | AGRP       | p.L64L   | agouti related neuropept 48 (0.00)   | 179 (0.17) | 0.45 |
| 11-14 | Gp3 | g.chr2:241814611C>T  | Nonsense Mutation | AGXT       | p.Q256*  | alanine-glyoxylate amin 17 (0.00)    | 81 (0.84)  | 3.32 |
| 11-14 | Gp3 | g.chr15:86284311A>G  | Missense Mutation | AKAP13     | p.D2552G | A kinase (PRKA) ancho 32 (0.00)      | 37 (0.62)  | 1.66 |
| 11-14 | Gp3 | g.chr12:120876191G>A | Silent            | AL021546.6 | p.V14V   | 30 (0.00)                            | 30 (0.37)  | 0.98 |
| 11-14 | Gp3 | g.chr22:50301498G>A  | Missense Mutation | ALG12      | p.T288M  | ALG12, alpha-1,6-manr 55 (0.00)      | 197 (0.49) | 1.30 |
| 11-14 | Gp3 | g.chr3:183960454G>T  | Missense Mutation | ALG3       | p.L349M  | ALG3, alpha-1,3- mann 53 (0.00)      | 123 (0.27) | 0.87 |
| 11-14 | Gp3 | g.chr2:233243764G>T  | Missense Mutation | ALPP       | p.A54S   | alkaline phosphatase, pl: 26 (0.00)  | 152 (0.20) | 0.54 |
| 11-14 | Gp3 | g.chr1:115223023G>A  | Silent            | AMPD1      | p.L237L  | adenosine monophosphat 94 (0.00)     | 206 (0.69) | 1.84 |
| 11-14 | Gp3 | g.chr17:62971206C>T  | RNA               | AMZ2P1     |          | archaelysin family meta 30 (0.00)    | 43 (0.81)  | 2.17 |
| 11-14 | Gp3 | g.chr15:65239677G>T  | Silent            | ANKDD1A    | p.R405R  | ankyrin repeat and death 30 (0.00)   | 61 (0.49)  | 1.31 |
| 11-14 | Gp3 | g.chr16:89346496C>A  | Nonsense Mutation | ANKRD11    | p.E2152* | ankyrin repeat domain 1 17 (0.00)    | 30 (0.33)  | 0.89 |
| 11-14 | Gp3 | g.chr9:38596004C>A   | Missense Mutation | ANKRD18A   | p.V445F  | ankyrin repeat domain 1 186 (0.00)   | 138 (0.37) | 0.99 |
| 11-14 | Gp3 | g.chr2:96657384G>T   | Missense Mutation | ANKRD36C   | p.Q25K   | ankyrin repeat domain 3 77 (0.00)    | 324 (0.54) | 1.45 |
| 11-14 | Gp3 | g.chr7:117864921G>A  | Missense Mutation | ANKRD7     | p.E13K   | ankyrin repeat domain 7 116 (0.00)   | 248 (0.87) | 3.02 |
| 11-14 | Gp3 | g.chr3:43642010T>C   | Missense Mutation | ANO10      | p.N68S   | anoctamin 10 20 (0.00)               | 123 (0.50) | 1.34 |
| 11-14 | Gp3 | g.chr10:47701007G>T  | Missense Mutation | ANTXRL     | p.C528F  | anthrax toxin receptor-li 70 (0.01)  | 163 (0.40) | 1.06 |
| 11-14 | Gp3 | g.chr17:40997478C>A  | Silent            | AOC2       | p.R279R  | amine oxidase, copper c 34 (0.00)    | 162 (0.19) | 0.49 |
| 11-14 | Gp3 | g.chr17:41003524G>T  | Missense Mutation | AOC3       | p.G55V   | amine oxidase, copper c 40 (0.00)    | 318 (0.77) | 2.06 |
| 11-14 | Gp3 | g.chr11:125366457C>T | Missense Mutation | AP000708.1 | p.P114L  | 42 (0.00)                            | 76 (0.80)  | 2.14 |
| 11-14 | Gp3 | g.chr14:24030778C>T  | Silent            | AP1G2      | p.K600K  | adaptor-related protein c 57 (0.00)  | 29 (0.97)  | 2.57 |
| 11-14 | Gp3 | g.chr19:10692500C>T  | Missense Mutation | AP1M2      | p.V108I  | adaptor-related protein c 51 (0.00)  | 32 (0.56)  | 1.50 |
| 11-14 | Gp3 | g.chr5:77423887G>T   | Missense Mutation | AP3B1      | p.D596E  | adaptor-related protein c 42 (0.00)  | 50 (0.36)  | 0.96 |
| 11-14 | Gp3 | g.chr19:2109095G>A   | Silent            | AP3D1      | p.H1154H | adaptor-related protein c 23 (0.00)  | 90 (0.42)  | 1.13 |
| 11-14 | Gp3 | g.chr1:114447259C>G  | Silent            | AP4B1      | p.L27L   | adaptor-related protein c 335 (0.00) | 830 (0.16) | 0.42 |
| 11-14 | Gp3 | g.chr11:116661588G>T | Silent            | APOA5      | p.G119G  | apolipoprotein A-V 26 (0.00)         | 92 (0.17)  | 0.46 |
| 11-14 | Gp3 | g.chr22:39418839G>T  | Missense Mutation | APOBEC3D   | p.E10D   | apolipoprotein B mRNA 151 (0.00)     | 21 (0.95)  | 2.54 |
| 11-14 | Gp3 | g.chr16:24942339G>T  | Missense Mutation | ARHGAP17   | p.P761T  | Rho GTPase activating j 25 (0.00)    | 371 (0.23) | 0.60 |
| 11-14 | Gp3 | g.chr16:24942390C>A  | Nonsense Mutation | ARHGAP17   | p.E744*  | Rho GTPase activating j 76 (0.01)    | 588 (0.22) | 0.59 |
| 11-14 | Gp3 | g.chr11:73021502G>A  | Missense Mutation | ARHGEF17   | p.A607T  | Rho guanine nucleotide 22 (0.00)     | 28 (0.46)  | 1.24 |
| 11-14 | Gp3 | g.chr1:16531908G>T   | Silent            | ARHGEF19   | p.R532R  | Rho guanine nucleotide 31 (0.00)     | 215 (0.18) | 0.47 |
| 11-14 | Gp3 | g.chr19:4891504C>A   | Nonsense Mutation | ARRDC5     | p.E195*  | arrestin domain containi 34 (0.00)   | 18 (0.89)  | 2.37 |
| 11-14 | Gp3 | g.chr7:95157445A>G   | Missense Mutation | ASB4       | p.M270V  | ankyrin repeat and SOC 35 (0.00)     | 130 (0.37) | 1.21 |
| 11-14 | Gp3 | g.chr2:220396534C>A  | Missense Mutation | ASIC4      | p.L340M  | acid-sensing (proton-gat 45 (0.00)   | 65 (0.58)  | 1.56 |
| 11-14 | Gp3 | g.chr9:120053698G>A  | Silent            | ASTN2      | p.S179S  | astrotactin 2 18 (0.00)              | 18 (0.56)  | 1.48 |
| 11-14 | Gp3 | g.chr15:25958900G>A  | Silent            | ATP10A     | p.H755H  | ATPase, class V, type 10 18 (0.00)   | 56 (0.27)  | 0.71 |

|       |     |                      |                   |          |          |                                              |            |            |      |
|-------|-----|----------------------|-------------------|----------|----------|----------------------------------------------|------------|------------|------|
| 11-14 | Gp3 | g.chr17:3839581A>T   | Missense Mutation | ATP2A3   | p.F835Y  | ATPase, Ca <sup>++</sup> transport 58 (0.00) | 173 (0.51) | 1.37       |      |
| 11-14 | Gp3 | g.chr3:10452323G>A   | Missense Mutation | ATP2B2   | p.P126S  | ATPase, Ca <sup>++</sup> transport 15 (0.00) | 48 (0.71)  | 1.89       |      |
| 11-14 | Gp3 | g.chr16:84486977G>T  | Splice Site       | ATP2C2   | p.K660N  | ATPase, Ca <sup>++</sup> transport 91 (0.00) | 197 (0.56) | 1.50       |      |
| 11-14 | Gp3 | g.chr2:71163196C>T   | Missense Mutation | ATP6V1B1 | p.R38C   | ATPase, H <sup>+</sup> transportin;35 (0.00) | 107 (0.29) | 0.77       |      |
| 11-14 | Gp3 | g.chr19:1807173G>A   | Silent            | ATP8B3   | p.D203D  | ATPase, aminophospho;29 (0.00)               | 242 (0.31) | 0.83       |      |
| 11-14 | Gp3 | g.chr18:77097416C>A  | Silent            | ATP9B    | p.P750P  | ATPase, class II, type 9;48 (0.00)           | 32 (0.16)  | 0.42       |      |
| 11-14 | Gp3 | g.chr3:63981501C>A   | Missense Mutation | ATXN7    | p.S668Y  | ataxin 7                                     | 106 (0.00) | 191 (0.64) | 1.70 |
| 11-14 | Gp3 | g.chr1:110033869G>T  | Missense Mutation | ATXN7L2  | p.G562W  | ataxin 7-like 2                              | 57 (0.00)  | 20 (0.95)  | 2.53 |
| 11-14 | Gp3 | g.chr7:70228290G>A   | Missense Mutation | AUTS2    | p.A393T  | autism susceptibility car                    | 39 (0.00)  | 62 (0.16)  | 0.43 |
| 11-14 | Gp3 | g.chr16:396284T>A    | Nonsense Mutation | AXIN1    | p.K248*  | axin 1                                       | 89 (0.00)  | 32 (0.19)  | 0.50 |
| 11-14 | Gp3 | g.chr16:396319C>T    | Missense Mutation | AXIN1    | p.G236E  | axin 1                                       | 97 (0.01)  | 28 (0.96)  | 2.57 |
| 11-14 | Gp3 | g.chr2:232263247C>T  | Missense Mutation | B3GNT7   | p.R273W  | UDP-GlcNAc:betaGal t                         | 33 (0.00)  | 171 (0.23) | 0.61 |
| 11-14 | Gp3 | g.chr2:232263436G>T  | Missense Mutation | B3GNT7   | p.V336L  | UDP-GlcNAc:betaGal t                         | 26 (0.00)  | 446 (0.18) | 0.48 |
| 11-14 | Gp3 | g.chr12:653562C>A    | Missense Mutation | B4GALNT3 | p.Q137K  | beta-1,4-N-acetyl-galact                     | 55 (0.00)  | 303 (0.25) | 0.66 |
| 11-14 | Gp3 | g.chr17:79060249C>T  | Silent            | BAIAP2   | p.L120L  | BAI1-associated protein                      | 90 (0.01)  | 366 (0.18) | 0.58 |
| 11-14 | Gp3 | g.chr11:129246070T>A | Missense Mutation | BARX2    | p.V47E   | BARX homeobox 2                              | 67 (0.00)  | 224 (0.16) | 0.42 |
| 11-14 | Gp3 | g.chr15:73023793G>A  | Missense Mutation | BBS4     | p.V287M  | Bardet-Biedl syndrome                        | 17 (0.00)  | 174 (0.99) | 2.64 |
| 11-14 | Gp3 | g.chr17:59118208C>A  | Missense Mutation | BCAS3    | p.L677I  | breast carcinoma amplif                      | 62 (0.00)  | 14 (0.36)  | 0.95 |
| 11-14 | Gp3 | g.chr17:6929894G>A   | Silent            | BCL6B    | p.S336S  | B-cell CLL/lymphoma                          | 45 (0.02)  | 100 (0.86) | 2.29 |
| 11-14 | Gp3 | g.chr17:6929918C>A   | Silent            | BCL6B    | p.A344A  | B-cell CLL/lymphoma                          | 46 (0.02)  | 110 (0.85) | 2.28 |
| 11-14 | Gp3 | g.chr15:91260976G>A  | Intron            | BLM      |          | Bloom syndrome, RecQ                         | 48 (0.00)  | 156 (0.87) | 2.32 |
| 11-14 | Gp3 | g.chr8:22053065G>T   | Missense Mutation | BMP1     | p.G577V  | bone morphogenetic pro                       | 43 (0.00)  | 186 (0.28) | 0.76 |
| 11-14 | Gp3 | g.chr9:16727819G>T   | Missense Mutation | BNC2     | p.N102K  | basonuclin 2                                 | 53 (0.00)  | 61 (0.46)  | 1.22 |
| 11-14 | Gp3 | g.chr20:31877729T>C  | Missense Mutation | BPIFB1   | p.V99A   | BPI fold containing fam                      | 59 (0.00)  | 24 (0.50)  | 1.33 |
| 11-14 | Gp3 | g.chr13:32913822A>G  | Missense Mutation | BRCA2    | p.K1777R | breast cancer 2, early on                    | 16 (0.00)  | 39 (0.26)  | 0.68 |
| 11-14 | Gp3 | g.chr9:121976209G>A  | Silent            | BRINP1   | p.L304L  | bone morphogenetic pro                       | 31 (0.00)  | 22 (0.82)  | 2.18 |
| 11-14 | Gp3 | g.chr1:177250026T>A  | Missense Mutation | BRINP2   | p.L572M  | bone morphogenetic pro                       | 62 (0.02)  | 232 (0.16) | 0.44 |
| 11-14 | Gp3 | g.chr1:190067835C>A  | Missense Mutation | BRINP3   | p.K538N  | bone morphogenetic pro                       | 53 (0.02)  | 195 (0.73) | 1.96 |
| 11-14 | Gp3 | g.chr3:49692505C>T   | Missense Mutation | BSN      | p.A1839V | bassoon presynaptic cyt                      | 24 (0.00)  | 99 (0.66)  | 1.75 |
| 11-14 | Gp3 | g.chr3:49697963G>T   | Silent            | BSN      | p.R2895R | bassoon presynaptic cyt                      | 45 (0.00)  | 102 (0.36) | 0.97 |
| 11-14 | Gp3 | g.chr3:49698350C>G   | Silent            | BSN      | p.G3024G | bassoon presynaptic cyt                      | 15 (0.00)  | 21 (0.43)  | 1.14 |
| 11-14 | Gp3 | g.chr10:50531812G>A  | Missense Mutation | C10orf71 | p.G408S  | chromosome 10 open re                        | 155 (0.00) | 14 (0.79)  | 2.10 |
| 11-14 | Gp3 | g.chr12:48578094G>T  | Silent            | C12orf68 | p.G63G   |                                              | 17 (0.00)  | 169 (0.21) | 0.57 |
| 11-14 | Gp3 | g.chr2:27360071C>A   | Missense Mutation | C2orf53  | p.G376V  |                                              | 38 (0.00)  | 197 (0.27) | 0.72 |
| 11-14 | Gp3 | g.chr2:26798993C>G   | Missense Mutation | C2orf70  | p.R100G  | chromosome 2 open rea                        | 108 (0.00) | 256 (0.19) | 0.51 |

|       |     |                     |                   |          |          |                          |            |            |      |
|-------|-----|---------------------|-------------------|----------|----------|--------------------------|------------|------------|------|
| 11-14 | Gp3 | g.chr4:113506755G>A | Missense Mutation | C4orf21  | p.S1348F |                          | 74 (0.00)  | 108 (0.40) | 1.06 |
| 11-14 | Gp3 | g.chr5:179269064C>A | Splice Site       | C5orf45  | p.E98*   | chromosome 5 open rea    | 35 (0.00)  | 152 (0.20) | 0.54 |
| 11-14 | Gp3 | g.chr6:165715174C>A | Missense Mutation | C6orf118 | p.D213Y  | chromosome 6 open rea    | 20 (0.00)  | 144 (0.49) | 1.31 |
| 11-14 | Gp3 | g.chr9:139379282G>A | Missense Mutation | C9orf163 | p.A128T  | chromosome 9 open rea    | 15 (0.00)  | 141 (0.82) | 2.19 |
| 11-14 | Gp3 | g.chr12:2787005C>A  | Missense Mutation | CACNA1C  | p.S1736Y | calcium channel, voltag  | 21 (0.00)  | 200 (0.47) | 1.27 |
| 11-14 | Gp3 | g.chr3:53785838C>A  | Silent            | CACNA1D  | p.P1193P | calcium channel, voltag  | 69 (0.00)  | 11 (0.82)  | 2.18 |
| 11-14 | Gp3 | g.chr17:48695589A>G | Missense Mutation | CACNA1G  | p.D1753G | calcium channel, voltag  | 29 (0.00)  | 182 (0.28) | 0.75 |
| 11-14 | Gp3 | g.chr22:36960712C>A | Missense Mutation | CACNG2   | p.A220S  | calcium channel, voltag  | 70 (0.00)  | 558 (0.23) | 0.62 |
| 11-14 | Gp3 | g.chr3:85225229A>T  | Intron            | CADM2    |          | cell adhesion molecule 2 | 125 (0.00) | 42 (0.98)  | 2.60 |
| 11-14 | Gp3 | g.chr3:85225230G>T  | Intron            | CADM2    |          | cell adhesion molecule 2 | 126 (0.00) | 42 (0.98)  | 2.60 |
| 11-14 | Gp3 | g.chr3:86095095A>G  | Intron            | CADM2    |          | cell adhesion molecule 2 | 55 (0.00)  | 28 (0.61)  | 1.62 |
| 11-14 | Gp3 | g.chr7:134632503C>T | Nonsense Mutation | CALD1    | p.R593*  | caldesmon 1              | 68 (0.00)  | 24 (0.42)  | 1.45 |
| 11-14 | Gp3 | g.chr9:138709877G>T | Missense Mutation | CAMSAP1  | p.S1406Y | calmodulin regulated sp  | 33 (0.00)  | 154 (0.33) | 0.88 |
| 11-14 | Gp3 | g.chr1:7723814G>A   | Missense Mutation | CAMTA1   | p.E403K  | calmodulin binding tran  | 33 (0.00)  | 80 (0.93)  | 2.47 |
| 11-14 | Gp3 | g.chr11:3033480A>G  | Silent            | CARS     | p.L671L  | cysteinyl-tRNA synthet   | 116 (0.00) | 290 (0.18) | 0.49 |
| 11-14 | Gp3 | g.chr17:42980042C>A | Missense Mutation | CCDC103  | p.Q196K  | coiled-coil domain cont  | 23 (0.00)  | 54 (0.72)  | 1.93 |
| 11-14 | Gp3 | g.chr7:76916235T>C  | Silent            | CCDC146  | p.L757L  | coiled-coil domain cont  | 99 (0.00)  | 38 (0.18)  | 0.49 |
| 11-14 | Gp3 | g.chr17:78039370C>A | Silent            | CCDC40   | p.R509R  | coiled-coil domain cont  | 42 (0.00)  | 328 (0.14) | 0.45 |
| 11-14 | Gp3 | g.chr1:1323369G>T   | Silent            | CCNL2    | p.G361G  | cyclin L2                | 27 (0.00)  | 96 (0.50)  | 1.33 |
| 11-14 | Gp3 | g.chr5:54527362C>T  | Silent            | CCNO     | p.S298S  | cyclin O                 | 40 (0.00)  | 399 (0.26) | 0.68 |
| 11-14 | Gp3 | g.chr3:46306877G>T  | Silent            | CCR3     | p.L76L   | chemokine (C-C motif)    | 121 (0.00) | 30 (0.93)  | 2.49 |
| 11-14 | Gp3 | g.chr22:17072648C>T | Missense Mutation | CCT8L2   | p.A265T  | chaperonin containing T  | 67 (0.00)  | 119 (0.47) | 1.25 |
| 11-14 | Gp3 | g.chr1:158151292G>T | Missense Mutation | CD1D     | p.A37S   | CD1d molecule            | 142 (0.00) | 623 (0.27) | 0.49 |
| 11-14 | Gp3 | g.chr15:73995321G>A | Silent            | CD276    | p.R209R  | CD276 molecule           | 30 (0.00)  | 196 (0.53) | 1.41 |
| 11-14 | Gp3 | g.chr17:72691898T>A | Missense Mutation | CD300LF  | p.Q228L  | CD300 molecule-like fa   | 16 (0.00)  | 85 (0.33)  | 0.88 |
| 11-14 | Gp3 | g.chr3:48205807C>A  | Missense Mutation | CDC25A   | p.G438C  | cell division cycle 25A  | 57 (0.00)  | 281 (0.29) | 0.77 |
| 11-14 | Gp3 | g.chr11:64602830C>A | Nonsense Mutation | CDC42BPG | p.E648*  | CDC42 binding protein    | 30 (0.00)  | 240 (0.43) | 1.14 |
| 11-14 | Gp3 | g.chr11:64602831C>A | Silent            | CDC42BPG | p.R647R  | CDC42 binding protein    | 30 (0.00)  | 240 (0.42) | 1.12 |
| 11-14 | Gp3 | g.chr10:73453976A>G | Missense Mutation | CDH23    | p.D755G  | cadherin-related 23      | 55 (0.00)  | 45 (0.20)  | 0.53 |
| 11-14 | Gp3 | g.chr1:1581157G>A   | Nonsense Mutation | CDK11B   | p.Q123*  | cyclin-dependent kinase  | 630 (0.00) | 476 (0.19) | 0.51 |
| 11-14 | Gp3 | g.chr16:22358454A>G | Silent            | CDR2     | p.V399V  | cerebellar degeneration- | 40 (0.00)  | 68 (0.29)  | 0.78 |
| 11-14 | Gp3 | g.chr16:22358471C>T | Missense Mutation | CDR2     | p.A394T  | cerebellar degeneration- | 32 (0.00)  | 72 (0.49)  | 1.30 |
| 11-14 | Gp3 | g.chr22:46930194C>A | Silent            | CELSR1   | p.R958R  | cadherin, EGF LAG sev    | 60 (0.02)  | 333 (0.21) | 0.57 |
| 11-14 | Gp3 | g.chr22:46930696C>G | Missense Mutation | CELSR1   | p.S791T  | cadherin, EGF LAG sev    | 20 (0.00)  | 102 (0.50) | 1.33 |
| 11-14 | Gp3 | g.chr3:48699779T>A  | Missense Mutation | CELSR3   | p.N97Y   | cadherin, EGF LAG sev    | 35 (0.00)  | 88 (0.58)  | 1.55 |

|       |     |                      |                   |         |          |                                     |            |      |
|-------|-----|----------------------|-------------------|---------|----------|-------------------------------------|------------|------|
| 11-14 | Gp3 | g.chr5:640584G>T     | Silent            | CEP72   | p.A468A  | centrosomal protein 72k25 (0.00)    | 79 (0.59)  | 1.59 |
| 11-14 | Gp3 | g.chr5:640637G>T     | Missense Mutation | CEP72   | p.S486I  | centrosomal protein 72k29 (0.00)    | 118 (0.42) | 1.11 |
| 11-14 | Gp3 | g.chr22:47086028C>A  | Nonsense Mutation | CERK    | p.E468*  | ceramide kinase 24 (0.00)           | 56 (0.39)  | 1.05 |
| 11-14 | Gp3 | g.chr15:57839585A>T  | Missense Mutation | CGNL1   | p.D1269V | cingulin-like 1 176 (0.00)          | 220 (0.47) | 1.26 |
| 11-14 | Gp3 | g.chr2:27324975G>A   | Missense Mutation | CGREF1  | p.T111I  | cell growth regulator wi 15 (0.00)  | 11 (0.91)  | 2.42 |
| 11-14 | Gp3 | g.chr17:48545702T>A  | Missense Mutation | CHAD    | p.K158M  | chondroadherin 54 (0.00)            | 26 (0.46)  | 1.23 |
| 11-14 | Gp3 | g.chr17:7814210G>C   | Missense Mutation | CHD3    | p.A1993P | chromodomain helicase 69 (0.00)     | 271 (0.52) | 1.38 |
| 11-14 | Gp3 | g.chr1:6182084C>T    | Intron            | CHD5    |          | chromodomain helicase 60 (0.02)     | 143 (0.17) | 0.45 |
| 11-14 | Gp3 | g.chr1:6182461C>A    | Intron            | CHD5    |          | chromodomain helicase 153 (0.01)    | 87 (0.30)  | 0.80 |
| 11-14 | Gp3 | g.chr1:6189511C>G    | Intron            | CHD5    |          | chromodomain helicase 48 (0.00)     | 81 (0.98)  | 2.60 |
| 11-14 | Gp3 | g.chr1:6205411A>G    | Intron            | CHD5    |          | chromodomain helicase 42 (0.00)     | 113 (0.17) | 0.45 |
| 11-14 | Gp3 | g.chr1:6221964G>T    | Intron            | CHD5    |          | chromodomain helicase 30 (0.00)     | 58 (0.47)  | 1.24 |
| 11-14 | Gp3 | g.chr17:4805246T>C   | Missense Mutation | CHRNE   | p.N161D  | cholinergic receptor, nic 53 (0.00) | 218 (0.29) | 0.78 |
| 11-14 | Gp3 | g.chr12:105151130A>T | Missense Mutation | CHST11  | p.K198M  | carbohydrate (chondroit 27 (0.00)   | 61 (0.80)  | 2.14 |
| 11-14 | Gp3 | g.chr15:40764290A>G  | Missense Mutation | CHST14  | p.Y293C  | carbohydrate (N-acetylgl 92 (0.00)  | 30 (0.20)  | 0.53 |
| 11-14 | Gp3 | g.chr16:75512610C>G  | Missense Mutation | CHST6   | p.D373H  | carbohydrate (N-acetylgl 21 (0.00)  | 43 (0.98)  | 2.60 |
| 11-14 | Gp3 | g.chr19:34263362G>T  | Missense Mutation | CHST8   | p.Q223H  | carbohydrate (N-acetylgl 18 (0.00)  | 184 (0.28) | 0.75 |
| 11-14 | Gp3 | g.chr19:34263808G>A  | Missense Mutation | CHST8   | p.R372Q  | carbohydrate (N-acetylgl 19 (0.00)  | 242 (0.17) | 0.46 |
| 11-14 | Gp3 | g.chr15:65489591A>G  | Silent            | CILP    | p.S1011S | cartilage intermediate la 63 (0.00) | 22 (0.64)  | 1.70 |
| 11-14 | Gp3 | g.chr12:106633816C>A | Missense Mutation | CKAP4   | p.E265D  | cytoskeleton-associated 181 (0.00)  | 363 (0.38) | 1.01 |
| 11-14 | Gp3 | g.chr3:184064432C>A  | Nonsense Mutation | CLCN2   | p.E843*  | chloride channel, voltag 27 (0.00)  | 44 (0.14)  | 0.44 |
| 11-14 | Gp3 | g.chr12:122812875C>A | Missense Mutation | CLIP1   | p.S989I  | CAP-GLY domain cont: 146 (0.00)     | 137 (0.99) | 2.63 |
| 11-14 | Gp3 | g.chr12:122812877C>A | Missense Mutation | CLIP1   | p.Q988H  | CAP-GLY domain cont: 147 (0.01)     | 135 (0.99) | 2.63 |
| 11-14 | Gp3 | g.chr22:19183914C>A  | Missense Mutation | CLTCL1  | p.A1352S | clathrin, heavy chain-lik 91 (0.00) | 84 (0.98)  | 2.60 |
| 11-14 | Gp3 | g.chr1:26510592C>G   | Missense Mutation | CNKSR1  | p.Q296E  | connector enhancer of k 30 (0.00)   | 97 (0.49)  | 1.32 |
| 11-14 | Gp3 | g.chr10:101147579C>A | Silent            | CNNM1   | p.I781I  | cyclin and CBS domain 21 (0.00)     | 176 (0.22) | 0.58 |
| 11-14 | Gp3 | g.chr7:135099146C>T  | Silent            | CNOT4   | p.R165R  | CCR4-NOT transcriptio 41 (0.00)     | 37 (0.14)  | 0.47 |
| 11-14 | Gp3 | g.chr17:40836222C>A  | Missense Mutation | CNTNAP1 | p.P113Q  | contactin associated pro 143 (0.00) | 694 (0.31) | 0.83 |
| 11-14 | Gp3 | g.chr17:40715245G>T  | Missense Mutation | COASY   | p.R202L  | CoA synthase 24 (0.00)              | 196 (0.39) | 1.03 |
| 11-14 | Gp3 | g.chr7:101176354C>T  | RNA               | COL26A1 |          | collagen, type XXVI, al 29 (0.00)   | 201 (0.24) | 0.85 |
| 11-14 | Gp3 | g.chr3:139092544G>A  | Silent            | COPB2   | p.V286V  | coatomer protein compl 48 (0.00)    | 31 (0.97)  | 3.14 |
| 11-14 | Gp3 | g.chr16:4409542G>C   | Missense Mutation | CORO7   | p.A730G  | coronin 7 18 (0.00)                 | 232 (0.42) | 1.11 |
| 11-14 | Gp3 | g.chr8:145625886G>T  | Splice Site       | CPSF1   | p.R230S  | cleavage and polyadeny 15 (0.00)    | 256 (0.16) | 0.44 |
| 11-14 | Gp3 | g.chr12:69652832G>A  | Missense Mutation | CPSF6   | p.R386Q  | cleavage and polyadeny 141 (0.00)   | 19 (0.84)  | 2.25 |
| 11-14 | Gp3 | g.chr12:69652840C>A  | Missense Mutation | CPSF6   | p.P389T  | cleavage and polyadeny 133 (0.00)   | 19 (0.84)  | 2.25 |

|       |     |                      |                   |          |          |                            |            |            |      |
|-------|-----|----------------------|-------------------|----------|----------|----------------------------|------------|------------|------|
| 11-14 | Gp3 | g.chr22:51008787G>T  | Missense Mutation | CPT1B    | p.Q693K  | carnitine palmitoyltransf  | 17 (0.00)  | 53 (0.28)  | 0.75 |
| 11-14 | Gp3 | g.chr19:4157080C>A   | Missense Mutation | CREB3L3  | p.P82H   | cAMP responsive eleme      | 39 (0.00)  | 14 (0.36)  | 0.95 |
| 11-14 | Gp3 | g.chr1:16958818C>A   | lincRNA           | CROCCP2  |          | ciliary rootlet coiled-coi | 110 (0.00) | 28 (0.25)  | 0.67 |
| 11-14 | Gp3 | g.chr19:48339507C>G  | Silent            | CRX      | p.P36P   | cone-rod homeobox          | 51 (0.00)  | 30 (0.47)  | 1.24 |
| 11-14 | Gp3 | g.chr21:44589300C>A  | Missense Mutation | CRYAA    | p.L31I   | crystallin, alpha A        | 23 (0.00)  | 187 (0.81) | 2.17 |
| 11-14 | Gp3 | g.chr5:149460454G>T  | Nonsense Mutation | CSF1R    | p.Y61*   | colony stimulating facto   | 17 (0.00)  | 38 (0.42)  | 1.12 |
| 11-14 | Gp3 | g.chr1:33985261G>A   | Missense Mutation | CSMD2    | p.P3585S | CUB and Sushi multiple     | 39 (0.00)  | 68 (0.38)  | 1.02 |
| 11-14 | Gp3 | g.chr13:37679109G>T  | Silent            | CSNK1A1L | p.P95P   | casein kinase 1, alpha 1-  | 39 (0.00)  | 131 (0.21) | 0.39 |
| 11-14 | Gp3 | g.chr3:39185129C>A   | Missense Mutation | CSRNP1   | p.S396I  | cysteine-serine-rich nuc   | 20 (0.00)  | 12 (0.42)  | 1.11 |
| 11-14 | Gp3 | g.chr3:39185640G>T   | Silent            | CSRNP1   | p.G256G  | cysteine-serine-rich nuc   | 33 (0.00)  | 107 (0.45) | 1.20 |
| 11-14 | Gp3 | g.chr3:39185645C>A   | Missense Mutation | CSRNP1   | p.A255S  | cysteine-serine-rich nuc   | 34 (0.00)  | 107 (0.36) | 0.95 |
| 11-14 | Gp3 | g.chr22:42523915G>T  | Missense Mutation | CYP2D6   | p.A305D  | cytochrome P450, famil     | 45 (0.00)  | 156 (0.26) | 0.70 |
| 11-14 | Gp3 | g.chr9:124361098C>A  | Intron            | DAB2IP   |          | DAB2 interacting protei    | 36 (0.00)  | 355 (0.16) | 0.42 |
| 11-14 | Gp3 | g.chr9:124411232C>T  | Intron            | DAB2IP   |          | DAB2 interacting protei    | 69 (0.00)  | 63 (0.27)  | 0.72 |
| 11-14 | Gp3 | g.chr9:124456852G>A  | Intron            | DAB2IP   |          | DAB2 interacting protei    | 109 (0.00) | 16 (0.62)  | 1.67 |
| 11-14 | Gp3 | g.chr9:124456945T>A  | Intron            | DAB2IP   |          | DAB2 interacting protei    | 47 (0.00)  | 47 (0.30)  | 0.79 |
| 11-14 | Gp3 | g.chr9:124460834C>T  | Intron            | DAB2IP   |          | DAB2 interacting protei    | 167 (0.00) | 376 (0.23) | 0.61 |
| 11-14 | Gp3 | g.chr9:124460902C>T  | Intron            | DAB2IP   |          | DAB2 interacting protei    | 42 (0.02)  | 173 (0.38) | 1.02 |
| 11-14 | Gp3 | g.chr9:124460953T>A  | Intron            | DAB2IP   |          | DAB2 interacting protei    | 17 (0.00)  | 73 (0.68)  | 1.83 |
| 11-14 | Gp3 | g.chr9:124506172C>A  | Intron            | DAB2IP   |          | DAB2 interacting protei    | 31 (0.00)  | 35 (0.97)  | 2.59 |
| 11-14 | Gp3 | g.chr9:124507715A>G  | Intron            | DAB2IP   |          | DAB2 interacting protei    | 48 (0.02)  | 235 (0.27) | 0.71 |
| 11-14 | Gp3 | g.chr9:124513262C>T  | Intron            | DAB2IP   |          | DAB2 interacting protei    | 48 (0.00)  | 23 (0.70)  | 1.86 |
| 11-14 | Gp3 | g.chr1:173803658G>A  | Splice Site       | DARS2    |          | aspartyl-tRNA syntheta     | 21 (0.00)  | 98 (0.99)  | 2.64 |
| 11-14 | Gp3 | g.chr12:113599728C>A | Missense Mutation | DDX54    | p.R757L  | DEAD (Asp-Glu-Ala-A        | 29 (0.00)  | 49 (0.16)  | 0.44 |
| 11-14 | Gp3 | g.chr22:19122588G>A  | Missense Mutation | DGCR14   | p.T379M  | DiGeorge syndrome crit     | 31 (0.00)  | 330 (0.32) | 0.85 |
| 11-14 | Gp3 | g.chr2:234368880A>G  | Missense Mutation | DGKD     | p.K957R  | diacylglycerol kinase, d   | 70 (0.00)  | 133 (0.28) | 0.74 |
| 11-14 | Gp3 | g.chr11:71150080T>C  | Missense Mutation | DHCR7    | p.N226D  | 7-dehydrocholesterol re    | 38 (0.00)  | 43 (0.35)  | 0.93 |
| 11-14 | Gp3 | g.chr10:430580C>T    | Splice Site       | DIP2C    |          | DIP2 disco-interacting p   | 69 (0.00)  | 143 (0.85) | 2.26 |
| 11-14 | Gp3 | g.chr1:68512885G>A   | Silent            | DIRAS3   | p.H32H   | DIRAS family, GTP-bir      | 54 (0.00)  | 144 (0.67) | 1.78 |
| 11-14 | Gp3 | g.chr8:12957832C>A   | Nonsense Mutation | DLC1     | p.E672*  | DLC1 Rho GTPase acti       | 35 (0.00)  | 115 (0.60) | 1.60 |
| 11-14 | Gp3 | g.chr17:7099888C>G   | Missense Mutation | DLG4     | p.G361R  | discs, large homolog 4 (   | 63 (0.00)  | 301 (0.14) | 0.38 |
| 11-14 | Gp3 | g.chr20:35125142G>T  | Silent            | DLGAP4   | p.P561P  | discs, large (Drosophila   | 96 (0.00)  | 370 (0.15) | 0.40 |
| 11-14 | Gp3 | g.chr10:124377568G>C | Missense Mutation | DMBT1    | p.G1514R | deleted in malignant bra   | 211 (0.00) | 223 (0.33) | 0.88 |
| 11-14 | Gp3 | g.chr10:124377590G>A | Missense Mutation | DMBT1    | p.R1521Q | deleted in malignant bra   | 271 (0.00) | 287 (0.63) | 1.68 |
| 11-14 | Gp3 | g.chr3:52417551C>T   | Silent            | DNAH1    | p.N2697N | dynein, axonemal, heav     | 122 (0.00) | 119 (0.22) | 0.58 |



|       |     |                     |                   |          |          |                            |            |            |      |
|-------|-----|---------------------|-------------------|----------|----------|----------------------------|------------|------------|------|
| 11-14 | Gp3 | g.chr17:76522751G>A | Silent            | DNAH17   | p.P1228P | dynein, axonemal, heav     | 67 (0.00)  | 460 (0.23) | 0.61 |
| 11-14 | Gp3 | g.chr17:76568918G>A | Missense Mutation | DNAH17   | p.S135L  | dynein, axonemal, heav     | 17 (0.00)  | 83 (0.37)  | 1.00 |
| 11-14 | Gp3 | g.chr17:7681690A>G  | Missense Mutation | DNAH2    | p.D1815G | dynein, axonemal, heav     | 56 (0.00)  | 53 (0.17)  | 0.45 |
| 11-14 | Gp3 | g.chr3:128181963C>T | Silent            | DNAJB8   | p.A42A   | DnaJ (Hsp40) homolog,      | 35 (0.00)  | 56 (0.34)  | 1.10 |
| 11-14 | Gp3 | g.chr11:6567428C>A  | Silent            | DNHD1    | p.G1753G | dynein heavy chain dom     | 68 (0.00)  | 67 (0.34)  | 0.92 |
| 11-14 | Gp3 | g.chr11:6592869G>A  | Missense Mutation | DNHD1    | p.E4639K | dynein heavy chain dom     | 42 (0.00)  | 123 (0.28) | 0.76 |
| 11-14 | Gp3 | g.chr9:131002263G>C | Splice Site       | DNM1     |          | dynamamin 1                | 31 (0.00)  | 36 (0.22)  | 0.59 |
| 11-14 | Gp3 | g.chr21:45670788G>A | Missense Mutation | DNMT3L   | p.P272S  | DNA (cytosine-5-)-met      | 32 (0.00)  | 17 (0.35)  | 0.94 |
| 11-14 | Gp3 | g.chr19:11348781C>A | Missense Mutation | DOCK6    | p.G591V  | dedicator of cytokines     | 46 (0.00)  | 291 (0.71) | 1.91 |
| 11-14 | Gp3 | g.chr20:53205136G>C | Splice Site       | DOK5     | p.D97H   | docking protein 5          | 99 (0.00)  | 49 (0.96)  | 2.56 |
| 11-14 | Gp3 | g.chr1:44437935C>T  | Missense Mutation | DPH2     | p.S425L  | DPH2 homolog (S. cere      | 36 (0.00)  | 57 (0.19)  | 0.51 |
| 11-14 | Gp3 | g.chr12:58001282C>A | Missense Mutation | DTX3     | p.N212K  | deltex 3, E3 ubiquitin li  | 19 (0.00)  | 37 (0.19)  | 0.50 |
| 11-14 | Gp3 | g.chr15:45408728C>G | Missense Mutation | DUOXA2   | p.Q119E  | dual oxidase maturation    | 71 (0.00)  | 102 (0.31) | 0.84 |
| 11-14 | Gp3 | g.chr17:7132554C>A  | Missense Mutation | DVL2     | p.S286I  | dishevelled segment pol    | 53 (0.00)  | 208 (0.15) | 0.41 |
| 11-14 | Gp3 | g.chr2:71801492G>T  | Missense Mutation | DYSF     | p.E1131D | dysferlin                  | 28 (0.00)  | 125 (0.62) | 1.64 |
| 11-14 | Gp3 | g.chr15:55790521G>T | Missense Mutation | DYX1C1   | p.L3I    | dyslexia susceptibility 1  | 15 (0.00)  | 86 (0.90)  | 2.39 |
| 11-14 | Gp3 | g.chr16:23546598C>A | Missense Mutation | EARS2    | p.R190L  | glutamyl-tRNA synthet      | 15 (0.00)  | 48 (0.60)  | 1.61 |
| 11-14 | Gp3 | g.chr16:23546650C>T | Missense Mutation | EARS2    | p.E173K  | glutamyl-tRNA synthet      | 24 (0.00)  | 86 (0.24)  | 0.65 |
| 11-14 | Gp3 | g.chr8:110576700C>A | Missense Mutation | EBAG9    | p.A230E  | estrogen receptor bindin   | 21 (0.00)  | 31 (0.97)  | 2.58 |
| 11-14 | Gp3 | g.chr1:150484268C>A | Nonsense Mutation | ECM1     | p.C348*  | extracellular matrix prot  | 54 (0.00)  | 99 (0.51)  | 1.35 |
| 11-14 | Gp3 | g.chr1:150484292C>A | Silent            | ECM1     | p.T356T  | extracellular matrix prot  | 57 (0.00)  | 91 (0.43)  | 1.14 |
| 11-14 | Gp3 | g.chr19:48220190C>A | Silent            | EHD2     | p.G107G  | EH-domain containing       | 236 (0.00) | 248 (0.17) | 0.45 |
| 11-14 | Gp3 | g.chr15:42193109G>T | Missense Mutation | EHD4     | p.L454I  | EH-domain containing       | 19 (0.00)  | 101 (0.56) | 1.50 |
| 11-14 | Gp3 | g.chr22:37770207G>A | Silent            | ELFN2    | p.A456A  | extracellular leucine-ricl | 78 (0.00)  | 458 (0.25) | 0.68 |
| 11-14 | Gp3 | g.chr16:67236437G>T | Splice Site       | ELMO3    |          | engulfment and cell mot    | 53 (0.02)  | 136 (0.68) | 1.80 |
| 11-14 | Gp3 | g.chr20:39990637G>T | Missense Mutation | EMILIN3  | p.S524R  | elastin microfibril interf | 28 (0.00)  | 161 (0.31) | 0.83 |
| 11-14 | Gp3 | g.chr8:144940953G>T | Missense Mutation | EPPK1    | p.L2157I | epiplakin 1                | 93 (0.00)  | 110 (0.21) | 0.56 |
| 11-14 | Gp3 | g.chr8:642498G>A    | Missense Mutation | ERICH1   | p.S95F   | glutamate-rich 1           | 58 (0.02)  | 362 (0.66) | 1.76 |
| 11-14 | Gp3 | g.chr8:642530C>A    | Missense Mutation | ERICH1   | p.E84D   | glutamate-rich 1           | 34 (0.00)  | 275 (0.61) | 1.62 |
| 11-14 | Gp3 | g.chr21:33887342C>T | Silent            | EVA1C    | p.L390L  | eva-1 homolog C (C. ele    | 49 (0.00)  | 37 (0.30)  | 0.79 |
| 11-14 | Gp3 | g.chr4:5798801C>T   | Missense Mutation | EVC      | p.R647W  | Ellis van Creveld syndrc   | 23 (0.00)  | 20 (0.80)  | 2.13 |
| 11-14 | Gp3 | g.chr17:74004938C>A | Nonsense Mutation | EVPL     | p.E1450* | envoplakin                 | 54 (0.00)  | 188 (0.26) | 0.68 |
| 11-14 | Gp3 | g.chr1:26361368T>C  | Missense Mutation | EXTL1    | p.L574P  | exostosin-like glycosyltr  | 71 (0.01)  | 134 (0.66) | 1.75 |
| 11-14 | Gp3 | g.chr3:184062409A>T | Missense Mutation | FAM131A  | p.D128V  | family with sequence sin   | 28 (0.00)  | 94 (0.44)  | 1.41 |
| 11-14 | Gp3 | g.chr10:15255670A>G | Silent            | FAM171A1 | p.S639S  | family with sequence sin   | 50 (0.00)  | 186 (0.17) | 0.46 |

|       |     |                     |                   |         |          |                          |            |            |      |
|-------|-----|---------------------|-------------------|---------|----------|--------------------------|------------|------------|------|
| 11-14 | Gp3 | g.chr12:49993506C>A | Silent            | FAM186B | p.G639G  | family with sequence si  | 75 (0.00)  | 109 (0.28) | 0.73 |
| 11-14 | Gp3 | g.chr7:30915251G>T  | Nonsense Mutation | FAM188B | p.E651*  | family with sequence si  | 22 (0.00)  | 23 (0.96)  | 3.27 |
| 11-14 | Gp3 | g.chr3:150421425G>C | Nonsense Mutation | FAM194A | p.Y87*   |                          | 24 (0.00)  | 91 (0.26)  | 0.86 |
| 11-14 | Gp3 | g.chr3:43073980G>C  | Missense Mutation | FAM198A | p.M75I   | family with sequence si  | 19 (0.00)  | 60 (0.47)  | 1.24 |
| 11-14 | Gp3 | g.chr1:113264911G>T | Missense Mutation | FAM19A3 | p.C19F   | family with sequence si  | 22 (0.00)  | 203 (0.19) | 0.50 |
| 11-14 | Gp3 | g.chr22:49103589G>T | Missense Mutation | FAM19A5 | p.C29F   | family with sequence si  | 20 (0.00)  | 15 (0.93)  | 2.49 |
| 11-14 | Gp3 | g.chr1:809329C>A    | lincRNA           | FAM41C  |          | family with sequence si  | 151 (0.00) | 306 (0.28) | 0.74 |
| 11-14 | Gp3 | g.chr1:212798634C>T | Silent            | FAM71A  | p.L139L  | family with sequence si  | 131 (0.01) | 280 (0.58) | 1.55 |
| 11-14 | Gp3 | g.chr9:131802876G>T | Start Codon SNP   | FAM73B  | p.M1I    | family with sequence si  | 28 (0.00)  | 38 (0.82)  | 2.18 |
| 11-14 | Gp3 | g.chr15:59752397G>A | Missense Mutation | FAM81A  | p.D96N   | family with sequence si  | 83 (0.00)  | 31 (0.48)  | 1.29 |
| 11-14 | Gp3 | g.chr19:49113218T>C | Missense Mutation | FAM83E  | p.S225G  | family with sequence si  | 21 (0.00)  | 180 (0.23) | 0.62 |
| 11-14 | Gp3 | g.chr16:5139151G>A  | Silent            | FAM86A  | p.T283T  | family with sequence si  | 69 (0.00)  | 295 (0.47) | 1.26 |
| 11-14 | Gp3 | g.chr14:45605483G>A | Nonsense Mutation | FANCM   | p.W83*   | Fanconi anemia, comple   | 31 (0.00)  | 13 (0.38)  | 1.03 |
| 11-14 | Gp3 | g.chr13:99061711T>A | Missense Mutation | FARP1   | p.L512M  | FERM, RhoGEF (ARH)       | 39 (0.00)  | 32 (0.72)  | 1.92 |
| 11-14 | Gp3 | g.chr11:92615945A>G | Missense Mutation | FAT3    | p.E3958G | FAT atypical cadherin    | 329 (0.00) | 53 (0.23)  | 0.60 |
| 11-14 | Gp3 | g.chr11:64889088G>T | Missense Mutation | FAU     | p.A35D   | Finkel-Biskis-Reilly mu  | 33 (0.00)  | 58 (0.33)  | 0.87 |
| 11-14 | Gp3 | g.chr5:127648364C>A | Missense Mutation | FBN2    | p.W1614L | fibrillin 2              | 157 (0.00) | 110 (0.99) | 1.82 |
| 11-14 | Gp3 | g.chr7:5521436C>A   | Silent            | FBXL18  | p.V709V  | F-box and leucine-rich r | 17 (0.00)  | 61 (0.59)  | 2.04 |
| 11-14 | Gp3 | g.chr5:15500803C>A  | Silent            | FBXL7   | p.G6G    | F-box and leucine-rich r | 23 (0.00)  | 17 (0.29)  | 0.78 |
| 11-14 | Gp3 | g.chr8:124992993C>G | Missense Mutation | FER1L6  | p.A451G  | fer-1-like family membe  | 25 (0.00)  | 74 (0.47)  | 1.26 |
| 11-14 | Gp3 | g.chr8:124993036C>T | Silent            | FER1L6  | p.F465F  | fer-1-like family membe  | 25 (0.00)  | 71 (0.46)  | 1.24 |
| 11-14 | Gp3 | g.chr19:35941054C>A | Silent            | FFAR2   | p.I146I  | free fatty acid receptor | 238 (0.00) | 27 (0.33)  | 0.89 |
| 11-14 | Gp3 | g.chr5:176524590C>T | Silent            | FGFR4   | p.T774T  | fibroblast growth factor | 30 (0.00)  | 178 (0.20) | 0.54 |
| 11-14 | Gp3 | g.chr1:152279206C>A | Missense Mutation | FLG     | p.S2719I | filaggrin                | 32 (0.00)  | 47 (0.36)  | 0.96 |
| 11-14 | Gp3 | g.chr7:128485109G>A | Missense Mutation | FLNC    | p.G1197E | filamin C, gamma         | 15 (0.00)  | 212 (0.17) | 0.61 |
| 11-14 | Gp3 | g.chr7:128490508C>A | Missense Mutation | FLNC    | p.P1790H | filamin C, gamma         | 17 (0.00)  | 54 (0.13)  | 0.45 |
| 11-14 | Gp3 | g.chr17:43321346T>C | Missense Mutation | FMNL1   | p.L801P  | formin-like 1            | 38 (0.00)  | 73 (0.51)  | 1.35 |
| 11-14 | Gp3 | g.chr17:80684398C>A | Missense Mutation | FN3KRP  | p.Q171K  | fructosamine 3 kinase re | 26 (0.00)  | 52 (0.25)  | 0.82 |
| 11-14 | Gp3 | g.chr14:75747543C>T | Silent            | FOS     | p.L187L  | FBJ murine osteosarcon   | 79 (0.00)  | 19 (0.79)  | 2.11 |
| 11-14 | Gp3 | g.chr2:114257337C>A | Silent            | FOXD4L1 | p.I168I  | forkhead box D4-like 1   | 28 (0.00)  | 190 (0.89) | 2.39 |
| 11-14 | Gp3 | g.chr2:88748305C>T  | RNA               | FOXI3   |          | forkhead box I3          | 44 (0.00)  | 138 (0.99) | 2.65 |
| 11-14 | Gp3 | g.chr4:79328865A>T  | Missense Mutation | FRAS1   | p.E1393V | Fraser extracellular mat | 104 (0.00) | 24 (0.83)  | 2.22 |
| 11-14 | Gp3 | g.chr5:39135032C>A  | Nonsense Mutation | FYB     | p.G534*  | FYN binding protein      | 242 (0.00) | 212 (0.20) | 0.54 |
| 11-14 | Gp3 | g.chr5:39135101G>A  | Nonsense Mutation | FYB     | p.Q511*  | FYN binding protein      | 125 (0.01) | 61 (0.41)  | 1.09 |
| 11-14 | Gp3 | g.chr3:46008622C>A  | Missense Mutation | FYCO1   | p.S735I  | FYVE and coiled-coil d   | 62 (0.00)  | 59 (0.97)  | 2.58 |

|       |     |                      |                   |          |          |                            |            |            |      |
|-------|-----|----------------------|-------------------|----------|----------|----------------------------|------------|------------|------|
| 11-14 | Gp3 | g.chr3:46009287C>A   | Silent            | FYCO1    | p.R513R  | FYVE and coiled-coil d     | 103 (0.00) | 57 (0.98)  | 2.62 |
| 11-14 | Gp3 | g.chr7:90896112C>A   | Missense Mutation | FZD1     | p.N639K  | frizzled class receptor 1  | 64 (0.00)  | 345 (0.14) | 0.47 |
| 11-14 | Gp3 | g.chr12:130648209C>A | Silent            | FZD10    | p.L208L  | frizzled class receptor 10 | 29 (0.00)  | 159 (0.52) | 1.39 |
| 11-14 | Gp3 | g.chr14:69813823C>T  | Silent            | GALNT16  | p.G446G  | polypeptide N-acetylgl     | 42 (0.00)  | 12 (0.75)  | 2.00 |
| 11-14 | Gp3 | g.chr19:36034316G>T  | Silent            | GAPDHS   | p.R272R  | glyceraldehyde-3-phosp     | 45 (0.00)  | 76 (0.25)  | 0.67 |
| 11-14 | Gp3 | g.chr16:90109653G>T  | Missense Mutation | GAS8     | p.G446V  | growth arrest-specific 8   | 24 (0.00)  | 41 (0.22)  | 0.59 |
| 11-14 | Gp3 | g.chr16:2034761T>C   | Missense Mutation | GFER     | p.F91S   | growth factor, augmente    | 32 (0.00)  | 43 (0.35)  | 0.93 |
| 11-14 | Gp3 | g.chr2:85788039A>G   | Missense Mutation | GGCX     | p.L38S   | gamma-glutamyl carbox      | 118 (0.00) | 358 (0.90) | 2.40 |
| 11-14 | Gp3 | g.chr1:147230939C>A  | Missense Mutation | GJA5     | p.W136C  | gap junction protein, alp  | 45 (0.00)  | 94 (0.19)  | 0.51 |
| 11-14 | Gp3 | g.chr1:147231183T>C  | Missense Mutation | GJA5     | p.D55G   | gap junction protein, alp  | 30 (0.00)  | 49 (0.14)  | 0.38 |
| 11-14 | Gp3 | g.chr19:19745477G>A  | Silent            | GMIP     | p.D641D  | GEM interacting proteir    | 63 (0.00)  | 368 (0.25) | 0.67 |
| 11-14 | Gp3 | g.chr20:57415246G>T  | Missense Mutation | GNAS     | p.A29S   | GNAS complex locus         | 17 (0.00)  | 292 (0.38) | 1.01 |
| 11-14 | Gp3 | g.chr22:23465549C>T  | Silent            | GNAZ     | p.I333I  | guanine nucleotide bind    | 76 (0.00)  | 79 (0.90)  | 2.40 |
| 11-14 | Gp3 | g.chr1:27215520C>T   | Missense Mutation | GPN2     | p.E170K  | GPN-loop GTPase 2          | 167 (0.00) | 36 (0.97)  | 2.59 |
| 11-14 | Gp3 | g.chr1:27216323C>A   | Nonsense Mutation | GPN2     | p.E89*   | GPN-loop GTPase 2          | 20 (0.00)  | 52 (0.17)  | 0.46 |
| 11-14 | Gp3 | g.chr14:59930491G>T  | Missense Mutation | GPR135   | p.P485H  | G protein-coupled recep    | 63 (0.00)  | 169 (0.24) | 0.65 |
| 11-14 | Gp3 | g.chr1:168054866C>A  | Missense Mutation | GPR161   | p.G366V  | G protein-coupled recep    | 97 (0.00)  | 558 (0.22) | 0.58 |
| 11-14 | Gp3 | g.chr2:133175407G>A  | Silent            | GPR39    | p.P264P  | G protein-coupled recep    | 34 (0.00)  | 198 (0.23) | 0.62 |
| 11-14 | Gp3 | g.chr2:105859324G>A  | Missense Mutation | GPR45    | p.E337K  | G protein-coupled recep    | 44 (0.00)  | 399 (0.19) | 0.51 |
| 11-14 | Gp3 | g.chr1:110085906C>A  | Missense Mutation | GPR61    | p.L88M   | G protein-coupled recep    | 53 (0.00)  | 19 (0.58)  | 1.54 |
| 11-14 | Gp3 | g.chr10:46998917C>T  | Missense Mutation | GPRIN2   | p.P13S   | G protein regulated indu   | 46 (0.00)  | 240 (0.15) | 0.39 |
| 11-14 | Gp3 | g.chr17:72846818C>A  | Missense Mutation | GRIN2C   | p.R401L  | glutamate receptor, iono   | 33 (0.00)  | 264 (0.21) | 0.56 |
| 11-14 | Gp3 | g.chr13:114321994C>A | Missense Mutation | GRK1     | p.A98E   | G protein-coupled recep    | 75 (0.00)  | 196 (0.23) | 0.61 |
| 11-14 | Gp3 | g.chr6:146755359G>T  | Silent            | GRM1     | p.L1004L | glutamate receptor, met    | 20 (0.00)  | 89 (0.24)  | 0.63 |
| 11-14 | Gp3 | g.chr14:77796680C>G  | Missense Mutation | GSTZ1    | p.P141A  | glutathione S-transferas   | 112 (0.01) | 543 (0.24) | 0.65 |
| 11-14 | Gp3 | g.chr7:73961461C>T   | Silent            | GTF2IRD1 | p.V587V  | GTF2I repeat domain cc     | 39 (0.00)  | 136 (0.19) | 0.51 |
| 11-14 | Gp3 | g.chr22:46725399G>A  | Missense Mutation | GTSE1    | p.D691N  | G-2 and S-phase expres     | 68 (0.01)  | 314 (0.29) | 0.77 |
| 11-14 | Gp3 | g.chr5:21496928T>C   | RNA               | GUSBP1   |          | glucuronidase, beta pset   | 34 (0.00)  | 13 (0.54)  | 1.44 |
| 11-14 | Gp3 | g.chr19:49473052C>T  | Missense Mutation | GYS1     | p.E560K  | glycogen synthase 1 (m     | 57 (0.00)  | 73 (0.85)  | 2.26 |
| 11-14 | Gp3 | g.chr22:50684774C>A  | Nonsense Mutation | HDAC10   | p.E535*  | histone deacetylase 10     | 17 (0.00)  | 182 (0.18) | 0.48 |
| 11-14 | Gp3 | g.chr7:18758402G>A   | Intron            | HDAC9    |          | histone deacetylase 9      | 40 (0.00)  | 25 (0.28)  | 0.75 |
| 11-14 | Gp3 | g.chr7:43484961C>A   | Missense Mutation | HECW1    | p.S730R  | HECT, C2 and WW dor        | 61 (0.02)  | 551 (0.13) | 0.45 |
| 11-14 | Gp3 | g.chr17:65074620C>A  | Silent            | HELZ     | p.V1859V | helicase with zinc finger  | 119 (0.00) | 131 (0.40) | 1.06 |
| 11-14 | Gp3 | g.chr20:62192789C>A  | Missense Mutation | HELZ2    | p.Q2289H | helicase with zinc finger  | 64 (0.00)  | 44 (0.16)  | 0.42 |
| 11-14 | Gp3 | g.chr9:100693113G>T  | Silent            | HEMGN    | p.S188S  | hemogen                    | 121 (0.00) | 125 (0.50) | 1.34 |

|       |     |                      |                   |           |          |                                      |            |            |      |
|-------|-----|----------------------|-------------------|-----------|----------|--------------------------------------|------------|------------|------|
| 11-14 | Gp3 | g.chr9:100693338G>T  | Missense Mutation | HEMGN     | p.S113R  | hemogen                              | 37 (0.00)  | 121 (0.42) | 1.12 |
| 11-14 | Gp3 | g.chr15:20645943G>T  | RNA               | HERC2P3   |          | hect domain and RLD 2                | 46 (0.00)  | 32 (0.78)  | 2.08 |
| 11-14 | Gp3 | g.chr17:43227583G>A  | Silent            | HEXIM1    | p.E342E  | hexamethylene bis-acetate            | 67 (0.00)  | 142 (0.41) | 1.09 |
| 11-14 | Gp3 | g.chr1:222717021C>T  | Missense Mutation | HHIPL2    | p.A278T  | HHIP-like 2                          | 54 (0.00)  | 95 (0.25)  | 0.67 |
| 11-14 | Gp3 | g.chr6:27776079T>C   | Missense Mutation | HIST1H2AI | p.V31A   | histone cluster 1, H2ai              | 72 (0.00)  | 341 (0.24) | 0.63 |
| 11-14 | Gp3 | g.chr6:27805786T>C   | Missense Mutation | HIST1H2AK | p.N111S  | histone cluster 1, H2ak              | 100 (0.00) | 138 (0.20) | 0.52 |
| 11-14 | Gp3 | g.chr6:27114214A>T   | Missense Mutation | HIST1H2BK | p.Y122N  | histone cluster 1, H2bk              | 95 (0.00)  | 15 (0.67)  | 1.78 |
| 11-14 | Gp3 | g.chr6:12163739T>C   | Missense Mutation | HIVEP1    | p.V2401A | human immunodeficiency               | 36 (0.03)  | 148 (0.52) | 1.39 |
| 11-14 | Gp3 | g.chr1:41978918A>G   | Missense Mutation | HIVEP3    | p.S1992P | human immunodeficiency               | 19 (0.00)  | 31 (0.29)  | 0.77 |
| 11-14 | Gp3 | g.chr1:42049834C>A   | Missense Mutation | HIVEP3    | p.R212L  | human immunodeficiency               | 38 (0.00)  | 39 (0.41)  | 1.09 |
| 11-14 | Gp3 | g.chr1:42049835G>A   | Missense Mutation | HIVEP3    | p.R212C  | human immunodeficiency               | 38 (0.00)  | 38 (0.39)  | 1.05 |
| 11-14 | Gp3 | g.chr5:176317838C>A  | Missense Mutation | HK3       | p.Q173H  | hexokinase 3 (white cell)            | 52 (0.00)  | 54 (0.15)  | 0.40 |
| 11-14 | Gp3 | g.chr17:46804306T>C  | Missense Mutation | HOXB13    | p.E234G  | homeobox B13                         | 29 (0.00)  | 241 (0.17) | 0.45 |
| 11-14 | Gp3 | g.chr17:46628137G>A  | Silent            | HOXB3     | p.S212S  | homeobox B3                          | 36 (0.00)  | 436 (0.22) | 0.58 |
| 11-14 | Gp3 | g.chr12:54403194C>A  | Silent            | HOXC8     | p.P42P   | homeobox C8                          | 32 (0.00)  | 127 (0.47) | 1.26 |
| 11-14 | Gp3 | g.chr2:176958296G>T  | Missense Mutation | HOXD13    | p.M226I  | homeobox D13                         | 29 (0.00)  | 104 (0.18) | 0.49 |
| 11-14 | Gp3 | g.chr10:100183366A>T | Missense Mutation | HPS1      | p.M531K  | Hermansky-Pudlak syndrome            | 110 (0.00) | 229 (0.23) | 0.61 |
| 11-14 | Gp3 | g.chr16:67470632T>C  | Missense Mutation | HSD11B2   | p.M315T  | hydroxysteroid (11-beta)             | 63 (0.00)  | 148 (0.14) | 0.38 |
| 11-14 | Gp3 | g.chr1:22178313G>T   | Missense Mutation | HSPG2     | p.T2326N | heparan sulfate proteoglycan         | 35 (0.03)  | 274 (0.33) | 0.89 |
| 11-14 | Gp3 | g.chr19:10403347A>G  | Missense Mutation | ICAM5     | p.T341A  | intercellular adhesion molecule      | 29 (0.00)  | 16 (0.56)  | 1.50 |
| 11-14 | Gp3 | g.chr1:23885695C>T   | Missense Mutation | ID3       | p.D75N   | inhibitor of DNA binding             | 46 (0.02)  | 47 (0.43)  | 1.13 |
| 11-14 | Gp3 | g.chr11:1756633G>A   | Silent            | IFITM10   | p.D188D  | interferon induced transmembrane     | 30 (0.00)  | 26 (0.69)  | 1.85 |
| 11-14 | Gp3 | g.chr16:1570201G>T   | Missense Mutation | IFT140    | p.N462K  | intraflagellar transport 1           | 27 (0.00)  | 11 (0.73)  | 1.94 |
| 11-14 | Gp3 | g.chr22:23101703C>G  | RNA               | IGLV2-14  |          | immunoglobulin lambda                | 76 (0.01)  | 215 (0.44) | 1.18 |
| 11-14 | Gp3 | g.chr11:117870089A>G | Silent            | IL10RA    | p.P490P  | interleukin 10 receptor, alpha       | 15 (0.00)  | 50 (0.24)  | 0.64 |
| 11-14 | Gp3 | g.chr13:21295934C>T  | Silent            | IL17D     | p.A150A  | interleukin 17D                      | 17 (0.00)  | 222 (0.42) | 1.13 |
| 11-14 | Gp3 | g.chr16:27460101G>A  | Missense Mutation | IL21R     | p.G372S  | interleukin 21 receptor              | 31 (0.00)  | 36 (0.22)  | 0.59 |
| 11-14 | Gp3 | g.chr1:24447962G>T   | Missense Mutation | IL22RA1   | p.P353Q  | interleukin 22 receptor, alpha       | 39 (0.03)  | 163 (0.61) | 1.62 |
| 11-14 | Gp3 | g.chr16:27374610C>T  | Missense Mutation | IL4R      | p.A646V  | interleukin 4 receptor               | 28 (0.00)  | 40 (0.30)  | 0.80 |
| 11-14 | Gp3 | g.chr7:22767117C>A   | Missense Mutation | IL6       | p.A25D   | interleukin 6                        | 24 (0.00)  | 60 (0.13)  | 0.46 |
| 11-14 | Gp3 | g.chr2:121106712C>T  | Silent            | INHBB     | p.F162F  | inhibin, beta B                      | 39 (0.03)  | 167 (0.32) | 0.86 |
| 11-14 | Gp3 | g.chr12:57849948G>T  | Missense Mutation | INHBE     | p.A124S  | inhibin, beta E                      | 85 (0.00)  | 129 (0.38) | 1.01 |
| 11-14 | Gp3 | g.chr4:143502111A>G  | Intron            | INPP4B    |          | inositol polyphosphate 4-phosphatase | 37 (0.00)  | 275 (1.00) | 2.66 |
| 11-14 | Gp3 | g.chr11:15197555C>T  | Missense Mutation | INSC      | p.R109C  | inscuteable homolog (Drosophila)     | 19 (0.00)  | 24 (0.46)  | 1.22 |
| 11-14 | Gp3 | g.chr19:7142839T>C   | Missense Mutation | INSR      | p.T844A  | insulin receptor                     | 76 (0.00)  | 157 (0.32) | 0.85 |

|       |     |                      |                   |          |          |                           |            |            |      |
|-------|-----|----------------------|-------------------|----------|----------|---------------------------|------------|------------|------|
| 11-14 | Gp3 | g.chr3:12977947G>T   | Missense Mutation | IQSEC1   | p.S204Y  | IQ motif and Sec7 dom     | 22 (0.00)  | 13 (0.62)  | 1.64 |
| 11-14 | Gp3 | g.chr19:46388445G>T  | Missense Mutation | IRF2BP1  | p.F196L  | interferon regulatory fac | 19 (0.00)  | 322 (0.16) | 0.41 |
| 11-14 | Gp3 | g.chr7:128588274G>T  | Silent            | IRF5     | p.L381L  | interferon regulatory fac | 77 (0.00)  | 221 (0.73) | 2.54 |
| 11-14 | Gp3 | g.chr2:227660476C>T  | Silent            | IRS1     | p.Q993Q  | insulin receptor substrat | 67 (0.00)  | 244 (0.28) | 0.74 |
| 11-14 | Gp3 | g.chr2:227660566G>T  | Silent            | IRS1     | p.G963G  | insulin receptor substrat | 72 (0.00)  | 289 (0.47) | 1.25 |
| 11-14 | Gp3 | g.chrX:107978383G>T  | Missense Mutation | IRS4     | p.R398S  | insulin receptor substrat | 20 (0.00)  | 77 (0.27)  | 0.45 |
| 11-14 | Gp3 | g.chr17:48155609C>T  | Missense Mutation | ITGA3    | p.T753I  | integrin, alpha 3 (antige | 24 (0.00)  | 58 (0.97)  | 2.57 |
| 11-14 | Gp3 | g.chr16:31341636C>G  | Missense Mutation | ITGAM    | p.S1024C | integrin, alpha M (comp   | 40 (0.00)  | 189 (0.29) | 0.76 |
| 11-14 | Gp3 | g.chr3:52823714C>G   | Missense Mutation | ITIH1    | p.P722R  | inter-alpha-trypsin inhib | 17 (0.00)  | 91 (0.38)  | 1.03 |
| 11-14 | Gp3 | g.chr4:6082021G>A    | Nonsense Mutation | JAKMIP1  | p.Q374*  | janus kinase and microtr  | 54 (0.00)  | 134 (0.60) | 1.61 |
| 11-14 | Gp3 | g.chr10:133978233G>A | Silent            | JAKMIP3  | p.E826E  | Janus kinase and microtr  | 69 (0.00)  | 225 (0.16) | 0.43 |
| 11-14 | Gp3 | g.chr8:41845045G>T   | Missense Mutation | KAT6A    | p.L213I  | K(lysine) acetyltransfer  | 56 (0.00)  | 27 (0.30)  | 0.79 |
| 11-14 | Gp3 | g.chr11:30034010G>C  | Silent            | KCNA4    | p.T72T   | potassium voltage-gated   | 36 (0.00)  | 135 (0.87) | 2.31 |
| 11-14 | Gp3 | g.chr12:5153903C>T   | Missense Mutation | KCNA5    | p.A197V  | potassium voltage-gated   | 21 (0.00)  | 340 (0.28) | 0.75 |
| 11-14 | Gp3 | g.chrX:48825897C>T   | Missense Mutation | KCND1    | p.R261Q  | potassium voltage-gated   | 21 (0.00)  | 46 (0.67)  | 1.12 |
| 11-14 | Gp3 | g.chr20:49626870G>A  | Silent            | KCNG1    | p.T2T    | potassium voltage-gated   | 20 (0.00)  | 22 (0.73)  | 1.94 |
| 11-14 | Gp3 | g.chr7:150656738C>A  | Missense Mutation | KCNH2    | p.V132L  | potassium voltage-gated   | 32 (0.00)  | 86 (0.36)  | 1.26 |
| 11-14 | Gp3 | g.chr16:29918246G>T  | Missense Mutation | KCTD13   | p.H313N  | potassium channel tetra   | 41 (0.02)  | 212 (0.33) | 0.89 |
| 11-14 | Gp3 | g.chr5:141309205C>A  | Silent            | KIAA0141 | p.L157L  | KIAA0141                  | 51 (0.00)  | 20 (0.45)  | 1.20 |
| 11-14 | Gp3 | g.chr17:73492444C>G  | Silent            | KIAA0195 | p.A1045A | KIAA0195                  | 26 (0.00)  | 200 (0.81) | 2.16 |
| 11-14 | Gp3 | g.chr9:114246995C>T  | Missense Mutation | KIAA0368 | p.V11I   | KIAA0368                  | 165 (0.00) | 240 (0.20) | 0.52 |
| 11-14 | Gp3 | g.chr4:123252536G>A  | Missense Mutation | KIAA1109 | p.E3769K | KIAA1109                  | 25 (0.00)  | 104 (0.77) | 2.05 |
| 11-14 | Gp3 | g.chr2:61304264A>G   | Missense Mutation | KIAA1841 | p.E214G  | KIAA1841                  | 18 (0.00)  | 145 (0.34) | 0.90 |
| 11-14 | Gp3 | g.chr17:43006314C>A  | Missense Mutation | KIF18B   | p.M532I  | kinesin family member     | 28 (0.00)  | 34 (0.62)  | 1.65 |
| 11-14 | Gp3 | g.chr2:241700681C>G  | Missense Mutation | KIF1A    | p.E735Q  | kinesin family member     | 42 (0.00)  | 219 (0.37) | 1.48 |
| 11-14 | Gp3 | g.chr1:200965440G>T  | Missense Mutation | KIF21B   | p.L721M  | kinesin family member     | 40 (0.00)  | 19 (0.42)  | 1.12 |
| 11-14 | Gp3 | g.chr9:34255750G>T   | Silent            | KIF24    | p.P1285P | kinesin family member     | 64 (0.00)  | 17 (0.88)  | 2.35 |
| 11-14 | Gp3 | g.chr19:36351458G>T  | Missense Mutation | KIRREL2  | p.G273W  | kin of IRRE like 2 (Dro:  | 50 (0.00)  | 400 (0.19) | 0.50 |
| 11-14 | Gp3 | g.chr1:6653517A>T    | Missense Mutation | KLHL21   | p.S568T  | kelch-like family memb    | 30 (0.00)  | 147 (0.29) | 0.78 |
| 11-14 | Gp3 | g.chr12:49425234T>C  | Silent            | KMT2D    | p.E4418E | lysine (K)-specific meth  | 47 (0.00)  | 108 (0.19) | 0.49 |
| 11-14 | Gp3 | g.chr12:49427988T>A  | Silent            | KMT2D    | p.V3534V | lysine (K)-specific meth  | 129 (0.00) | 12 (0.92)  | 2.44 |
| 11-14 | Gp3 | g.chr1:47016828G>A   | Silent            | KNCN     | p.L20L   | kinocilin                 | 23 (0.00)  | 296 (0.36) | 0.95 |
| 11-14 | Gp3 | g.chr10:135020245C>A | Missense Mutation | KNDC1    | p.F1148L | kinase non-catalytic C-l  | 75 (0.00)  | 180 (0.87) | 2.33 |
| 11-14 | Gp3 | g.chr10:135027224A>G | Missense Mutation | KNDC1    | p.I1507V | kinase non-catalytic C-l  | 18 (0.00)  | 24 (0.29)  | 0.78 |
| 11-14 | Gp3 | g.chr13:50296631C>T  | Missense Mutation | KPNA3    | p.A180T  | karyopherin alpha 3 (im   | 43 (0.00)  | 18 (0.89)  | 1.69 |

|       |     |                      |                   |           |          |                           |            |            |      |
|-------|-----|----------------------|-------------------|-----------|----------|---------------------------|------------|------------|------|
| 11-14 | Gp3 | g.chr17:39672182G>A  | Silent            | KRT15     | p.R327R  | keratin 15                | 40 (0.00)  | 27 (0.96)  | 2.57 |
| 11-14 | Gp3 | g.chr17:39619093G>A  | Silent            | KRT32     | p.N402N  | keratin 32                | 49 (0.00)  | 146 (0.29) | 0.79 |
| 11-14 | Gp3 | g.chr17:39521473C>A  | Missense Mutation | KRT33B    | p.R277L  | keratin 33B               | 43 (0.00)  | 103 (0.19) | 0.52 |
| 11-14 | Gp3 | g.chr12:52566100G>A  | Nonsense Mutation | KRT80     | p.Q354*  | keratin 80                | 18 (0.00)  | 54 (0.28)  | 0.74 |
| 11-14 | Gp3 | g.chr21:45994489G>A  | Missense Mutation | KRTAP10-4 | p.G285D  | keratin associated protei | 61 (0.00)  | 222 (0.14) | 0.38 |
| 11-14 | Gp3 | g.chr21:46011829C>A  | Silent            | KRTAP10-6 | p.V179V  | keratin associated protei | 45 (0.00)  | 232 (0.14) | 0.38 |
| 11-14 | Gp3 | g.chr21:46047441C>T  | Missense Mutation | KRTAP10-9 | p.S118F  | keratin associated protei | 49 (0.00)  | 594 (0.16) | 0.42 |
| 11-14 | Gp3 | g.chr21:46077992C>T  | Silent            | KRTAP12-3 | p.S32S   | keratin associated protei | 63 (0.00)  | 337 (0.38) | 1.00 |
| 11-14 | Gp3 | g.chr17:39296632G>A  | Silent            | KRTAP4-6  | p.C36C   | keratin associated protei | 32 (0.00)  | 252 (0.20) | 0.54 |
| 11-14 | Gp3 | g.chr11:1629496G>T   | Nonsense Mutation | KRTAP5-3  | p.C40*   | keratin associated protei | 95 (0.00)  | 274 (0.20) | 0.53 |
| 11-14 | Gp3 | g.chr22:41621835G>C  | Missense Mutation | L3MBTL2   | p.G465A  | l(3)mbt-like 2 (Drosoph   | 43 (0.00)  | 161 (0.53) | 1.42 |
| 11-14 | Gp3 | g.chr20:60904102G>A  | Silent            | LAMA5     | p.S1415S | laminin, alpha 5          | 89 (0.01)  | 433 (0.39) | 1.05 |
| 11-14 | Gp3 | g.chr3:49159131G>A   | Nonsense Mutation | LAMB2     | p.Q1696* | laminin, beta 2 (laminin  | 97 (0.00)  | 293 (0.21) | 0.56 |
| 11-14 | Gp3 | g.chr3:49159794G>C   | Missense Mutation | LAMB2     | p.A1528G | laminin, beta 2 (laminin  | 34 (0.00)  | 67 (0.28)  | 0.76 |
| 11-14 | Gp3 | g.chr9:133901723C>A  | Missense Mutation | LAMC3     | p.P142H  | laminin, gamma 3          | 26 (0.00)  | 159 (0.27) | 0.72 |
| 11-14 | Gp3 | g.chr9:133936508G>T  | Missense Mutation | LAMC3     | p.A749S  | laminin, gamma 3          | 20 (0.00)  | 76 (0.50)  | 1.33 |
| 11-14 | Gp3 | g.chr1:32740402C>G   | Missense Mutation | LCK       | p.P57R   | LCK proto-oncogene, S:    | 42 (0.00)  | 49 (0.18)  | 0.49 |
| 11-14 | Gp3 | g.chr9:138415728G>A  | Missense Mutation | LCN1      | p.G99R   | lipocalin 1               | 42 (0.00)  | 518 (0.39) | 1.04 |
| 11-14 | Gp3 | g.chr9:138415792A>G  | Missense Mutation | LCN1      | p.E120G  | lipocalin 1               | 54 (0.02)  | 354 (0.23) | 0.63 |
| 11-14 | Gp3 | g.chr17:39967131G>T  | Missense Mutation | LEPREL4   | p.F257L  | leprecan-like 4           | 20 (0.00)  | 58 (0.76)  | 2.02 |
| 11-14 | Gp3 | g.chr1:202287814G>T  | Missense Mutation | LGR6      | p.A795S  | leucine-rich repeat cont  | 29 (0.00)  | 128 (0.23) | 0.62 |
| 11-14 | Gp3 | g.chr19:54849721G>C  | Missense Mutation | LILRA4    | p.Q101E  | leukocyte immunoglobul    | 28 (0.00)  | 179 (0.73) | 1.94 |
| 11-14 | Gp3 | g.chr13:21894377G>C  | lincRNA           | LINC00539 |          | long intergenic non-prot  | 25 (0.00)  | 45 (0.27)  | 0.71 |
| 11-14 | Gp3 | g.chr13:21894539G>C  | lincRNA           | LINC00539 |          | long intergenic non-prot  | 36 (0.00)  | 108 (0.55) | 1.46 |
| 11-14 | Gp3 | g.chr17:18145239C>A  | Silent            | LLGL1     | p.S936S  | lethal giant larvae homo  | 69 (0.00)  | 261 (0.43) | 1.13 |
| 11-14 | Gp3 | g.chr17:73564664C>A  | Missense Mutation | LLGL2     | p.L382M  | lethal giant larvae homo  | 20 (0.00)  | 102 (0.53) | 1.41 |
| 11-14 | Gp3 | g.chr19:14266198G>C  | Missense Mutation | LPHN1     | p.F1094L | latrophilin 1             | 26 (0.00)  | 161 (0.31) | 0.83 |
| 11-14 | Gp3 | g.chr3:197547272G>A  | Missense Mutation | LRCH3     | p.R204K  | leucine-rich repeats and  | 44 (0.00)  | 12 (0.83)  | 2.70 |
| 11-14 | Gp3 | g.chr18:7231236C>G   | Missense Mutation | LRRC30    | p.L34V   | leucine rich repeat conta | 48 (0.00)  | 118 (0.65) | 1.74 |
| 11-14 | Gp3 | g.chr18:7231261C>A   | Missense Mutation | LRRC30    | p.S42Y   | leucine rich repeat conta | 49 (0.00)  | 123 (0.34) | 0.91 |
| 11-14 | Gp3 | g.chr18:7231658C>T   | Silent            | LRRC30    | p.F174F  | leucine rich repeat conta | 124 (0.00) | 136 (0.65) | 1.73 |
| 11-14 | Gp3 | g.chr15:101605621G>T | Missense Mutation | LRRK1     | p.G1660V | leucine-rich repeat kina  | 49 (0.00)  | 100 (0.59) | 1.57 |
| 11-14 | Gp3 | g.chr15:101605689G>T | Missense Mutation | LRRK1     | p.D1683Y | leucine-rich repeat kina  | 97 (0.01)  | 250 (0.44) | 1.17 |
| 11-14 | Gp3 | g.chr7:102106649G>A  | Missense Mutation | LRWD1     | p.V122I  | leucine-rich repeats and  | 40 (0.00)  | 252 (0.58) | 2.01 |
| 11-14 | Gp3 | g.chr19:35739800G>T  | Nonsense Mutation | LSR       | p.G7*    | lipolysis stimulated lipo | 16 (0.00)  | 30 (0.43)  | 1.16 |

|       |     |                     |                   |          |          |                           |            |            |      |
|-------|-----|---------------------|-------------------|----------|----------|---------------------------|------------|------------|------|
| 11-14 | Gp3 | g.chr8:20110644C>A  | Silent            | LZTS1    | p.L266L  | leucine zipper, putative  | 36 (0.00)  | 46 (0.48)  | 1.28 |
| 11-14 | Gp3 | g.chr8:20110830G>A  | Silent            | LZTS1    | p.S204S  | leucine zipper, putative  | 39 (0.03)  | 86 (0.29)  | 0.78 |
| 11-14 | Gp3 | g.chrX:140994185G>T | Missense Mutation | MAGEC1   | p.G332V  | melanoma antigen famil    | 18 (0.00)  | 41 (0.41)  | 0.69 |
| 11-14 | Gp3 | g.chr7:77660469A>T  | Intron            | MAGI2    |          | membrane associated gu    | 63 (0.00)  | 25 (0.40)  | 1.07 |
| 11-14 | Gp3 | g.chr7:77763520G>T  | Intron            | MAGI2    |          | membrane associated gu    | 35 (0.00)  | 14 (0.93)  | 2.48 |
| 11-14 | Gp3 | g.chr7:78627729C>A  | Intron            | MAGI2    |          | membrane associated gu    | 22 (0.00)  | 39 (0.51)  | 1.37 |
| 11-14 | Gp3 | g.chr7:78708322C>A  | Intron            | MAGI2    |          | membrane associated gu    | 77 (0.00)  | 206 (0.46) | 1.23 |
| 11-14 | Gp3 | g.chr7:78754584A>G  | Intron            | MAGI2    |          | membrane associated gu    | 40 (0.00)  | 55 (0.27)  | 0.73 |
| 11-14 | Gp3 | g.chr7:78997781C>T  | Intron            | MAGI2    |          | membrane associated gu    | 75 (0.00)  | 317 (0.70) | 2.29 |
| 11-14 | Gp3 | g.chr7:79020076C>T  | Intron            | MAGI2    |          | membrane associated gu    | 94 (0.00)  | 42 (0.98)  | 3.21 |
| 11-14 | Gp3 | g.chr7:79040500T>A  | Intron            | MAGI2    |          | membrane associated gu    | 83 (0.00)  | 40 (0.57)  | 1.89 |
| 11-14 | Gp3 | g.chr4:140640894C>A | Missense Mutation | MAML3    | p.Q1000H | mastermind-like 3 (Dros   | 34 (0.00)  | 126 (0.77) | 2.05 |
| 11-14 | Gp3 | g.chr9:140000636G>T | Silent            | MAN1B1   | p.L438L  | mannosidase, alpha, cla   | 22 (0.00)  | 153 (0.16) | 0.42 |
| 11-14 | Gp3 | g.chr18:48190830G>T | Missense Mutation | MAPK4    | p.D168Y  | mitogen-activated protei  | 142 (0.00) | 111 (0.33) | 0.89 |
| 11-14 | Gp3 | g.chr16:1793372G>A  | Silent            | MAPK8IP3 | p.L213L  | mitogen-activated protei  | 16 (0.00)  | 173 (0.25) | 0.66 |
| 11-14 | Gp3 | g.chr19:45783647T>C | Missense Mutation | MARK4    | p.M341T  | MAP/microtubule affini    | 50 (0.00)  | 131 (0.33) | 0.88 |
| 11-14 | Gp3 | g.chr1:46500535T>C  | Silent            | MAST2    | p.R1398R | microtubule associated ε  | 73 (0.00)  | 24 (0.58)  | 1.56 |
| 11-14 | Gp3 | g.chr2:85769865G>T  | Missense Mutation | MAT2A    | p.V253F  | methionine adenosyltrar   | 36 (0.00)  | 34 (0.97)  | 2.59 |
| 11-14 | Gp3 | g.chr3:127325008G>T | Nonsense Mutation | MCM2     | p.E241*  | minichromosome maint      | 55 (0.00)  | 104 (0.14) | 0.47 |
| 11-14 | Gp3 | g.chr17:60140614T>G | Missense Mutation | MED13    | p.T39P   | mediator complex subur    | 63 (0.00)  | 51 (0.90)  | 2.41 |
| 11-14 | Gp3 | g.chr22:20937154C>A | Missense Mutation | MED15    | p.S439R  | mediator complex subur    | 36 (0.00)  | 124 (0.20) | 0.54 |
| 11-14 | Gp3 | g.chr15:90321545C>A | Missense Mutation | MESP2    | p.R392S  | mesoderm posterior basi   | 65 (0.02)  | 227 (0.15) | 0.39 |
| 11-14 | Gp3 | g.chr3:196743199G>T | Missense Mutation | MFI2     | p.S314R  | antigen p97 (melanoma     | 20 (0.00)  | 49 (0.12)  | 0.40 |
| 11-14 | Gp3 | g.chr8:145736018C>T | Missense Mutation | MFSD3    | p.R290C  | major facilitator superfa | 57 (0.00)  | 258 (0.22) | 0.60 |
| 11-14 | Gp3 | g.chr12:53647517C>G | Missense Mutation | MFSD5    | p.R300G  | major facilitator superfa | 20 (0.00)  | 47 (0.40)  | 1.08 |
| 11-14 | Gp3 | g.chr5:180218678C>T | Missense Mutation | MGAT1    | p.A432T  | mannosyl (alpha-1,3-)-g   | 38 (0.00)  | 85 (0.73)  | 1.95 |
| 11-14 | Gp3 | g.chr22:18301222G>T | Missense Mutation | MICAL3   | p.P1402Q | microtubule associated r  | 25 (0.00)  | 160 (0.25) | 0.67 |
| 11-14 | Gp3 | g.chr17:4794800C>G  | Missense Mutation | MINK1    | p.P597R  | misshapen-like kinase 1   | 15 (0.00)  | 16 (0.31)  | 0.83 |
| 11-14 | Gp3 | g.chr22:50925816C>T | Silent            | MIOX     | p.G6G    | myo-inositol oxygenase    | 29 (0.00)  | 138 (0.49) | 1.31 |
| 11-14 | Gp3 | g.chr3:37035084G>T  | Missense Mutation | MLH1     | p.V16L   | mutL homolog 1            | 88 (0.01)  | 315 (0.32) | 0.86 |
| 11-14 | Gp3 | g.chr9:20448178C>T  | Silent            | MLLT3    | p.K121K  | myeloid/lymphoid or mi    | 82 (0.00)  | 68 (0.62)  | 1.65 |
| 11-14 | Gp3 | g.chr6:168352430G>A | Missense Mutation | MLLT4    | p.A1459T | myeloid/lymphoid or mi    | 55 (0.00)  | 446 (0.57) | 1.53 |
| 11-14 | Gp3 | g.chr10:99218654G>A | Silent            | MMS19    | p.L990L  | MMS19 nucleotide exci     | 105 (0.00) | 19 (0.68)  | 1.82 |
| 11-14 | Gp3 | g.chr1:47078941C>A  | Missense Mutation | MOB3C    | p.R41L   | MOB kinase activator 3    | 40 (0.00)  | 169 (0.80) | 2.15 |
| 11-14 | Gp3 | g.chr19:4359211G>T  | Nonsense Mutation | MPND     | p.E430*  | MPN domain containinε     | 33 (0.00)  | 217 (0.17) | 0.44 |

|       |     |                      |                   |         |          |                                       |            |            |      |
|-------|-----|----------------------|-------------------|---------|----------|---------------------------------------|------------|------------|------|
| 11-14 | Gp3 | g.chr2:17998115C>G   | Silent            | MSGN1   | p.G110G  | mesogenin 1                           | 36 (0.00)  | 16 (0.56)  | 1.50 |
| 11-14 | Gp3 | g.chr1:76262715G>A   | Silent            | MSH4    | p.A15A   | mutS homolog 4                        | 32 (0.00)  | 157 (0.68) | 1.80 |
| 11-14 | Gp3 | g.chr17:55752373C>A  | Missense Mutation | MSI2    | p.N277K  | musashi RNA-binding p40               | 0 (0.00)   | 108 (0.73) | 1.95 |
| 11-14 | Gp3 | g.chr3:49940121G>T   | Missense Mutation | MST1R   | p.R308S  | macrophage stimulating 60             | 0 (0.00)   | 74 (0.20)  | 0.54 |
| 11-14 | Gp3 | g.chr14:105927226C>A | Missense Mutation | MTA1    | p.A276D  | metastasis associated 1               | 73 (0.00)  | 238 (0.42) | 1.11 |
| 11-14 | Gp3 | g.chr1:11861447C>G   | Silent            | MTHFR   | p.R82R   | methylenetetrahydrofolate 23          | 0 (0.00)   | 15 (0.93)  | 2.49 |
| 11-14 | Gp3 | g.chr4:187455628T>A  | Missense Mutation | MTNR1A  | p.N90Y   | melatonin receptor 1A                 | 94 (0.00)  | 95 (0.38)  | 1.01 |
| 11-14 | Gp3 | g.chr7:100682881A>G  | Silent            | MUC17   | p.E2728E | mucin 17, cell surface associated     | 112 (0.00) | 153 (0.12) | 0.41 |
| 11-14 | Gp3 | g.chr7:100683673G>T  | Missense Mutation | MUC17   | p.M2992I | mucin 17, cell surface associated     | 116 (0.00) | 330 (0.34) | 1.17 |
| 11-14 | Gp3 | g.chr7:100683678T>C  | Missense Mutation | MUC17   | p.V2994A | mucin 17, cell surface associated     | 117 (0.00) | 337 (0.12) | 0.41 |
| 11-14 | Gp3 | g.chr7:100683681G>T  | Missense Mutation | MUC17   | p.S2995I | mucin 17, cell surface associated     | 118 (0.00) | 344 (0.35) | 1.22 |
| 11-14 | Gp3 | g.chr11:1094702A>T   | Silent            | MUC2    | p.S1930S | mucin 2, oligomeric subunit 47        | 0 (0.02)   | 418 (0.23) | 0.63 |
| 11-14 | Gp3 | g.chr11:1094703G>T   | Missense Mutation | MUC2    | p.A1931S | mucin 2, oligomeric subunit 49        | 0 (0.02)   | 418 (0.23) | 0.61 |
| 11-14 | Gp3 | g.chr11:1261554G>T   | Missense Mutation | MUC5B   | p.A1307S | mucin 5B, oligomeric subunit 45       | 0 (0.02)   | 384 (0.39) | 1.04 |
| 11-14 | Gp3 | g.chr11:1267970C>A   | Missense Mutation | MUC5B   | p.T3287N | mucin 5B, oligomeric subunit 93       | 0 (0.00)   | 536 (0.42) | 1.11 |
| 11-14 | Gp3 | g.chr11:1269632C>G   | Missense Mutation | MUC5B   | p.A3841G | mucin 5B, oligomeric subunit 100      | 0 (0.00)   | 171 (0.21) | 0.56 |
| 11-14 | Gp3 | g.chr11:1271682C>T   | Silent            | MUC5B   | p.A4524A | mucin 5B, oligomeric subunit 134      | 0 (0.00)   | 149 (0.23) | 0.61 |
| 11-14 | Gp3 | g.chr11:1025184G>T   | Missense Mutation | MUC6    | p.Q995K  | mucin 6, oligomeric subunit 31        | 0 (0.00)   | 130 (0.99) | 2.65 |
| 11-14 | Gp3 | g.chr11:1025261C>G   | Missense Mutation | MUC6    | p.S969T  | mucin 6, oligomeric subunit 40        | 0 (0.03)   | 470 (0.34) | 0.91 |
| 11-14 | Gp3 | g.chr17:4445915T>C   | Missense Mutation | MYBBP1A | p.H1005R | MYB binding protein (F41)             | 0 (0.00)   | 481 (0.20) | 0.53 |
| 11-14 | Gp3 | g.chr17:4445930C>A   | Missense Mutation | MYBBP1A | p.S1000I | MYB binding protein (F43)             | 0 (0.00)   | 465 (0.16) | 0.43 |
| 11-14 | Gp3 | g.chr17:4453572G>C   | Missense Mutation | MYBBP1A | p.P367R  | MYB binding protein (F47)             | 0 (0.00)   | 416 (0.15) | 0.41 |
| 11-14 | Gp3 | g.chr11:47360903T>C  | Missense Mutation | MYBPC3  | p.D707G  | myosin binding protein class 35       | 0 (0.00)   | 72 (0.21)  | 0.56 |
| 11-14 | Gp3 | g.chr16:15917212G>A  | Silent            | MYH11   | p.Y134Y  | myosin, heavy chain 11, class 40      | 0 (0.00)   | 143 (0.69) | 1.85 |
| 11-14 | Gp3 | g.chr17:10212649C>A  | Nonsense Mutation | MYH13   | p.E1691* | myosin, heavy chain 13, class 19      | 0 (0.00)   | 187 (0.27) | 0.71 |
| 11-14 | Gp3 | g.chr17:1381782A>C   | Missense Mutation | MYO1C   | p.V371G  | myosin IC                             | 20 (0.00)  | 289 (0.17) | 0.45 |
| 11-14 | Gp3 | g.chr11:76892556T>C  | Missense Mutation | MYO7A   | p.M942T  | myosin VIIA                           | 24 (0.00)  | 43 (0.63)  | 1.67 |
| 11-14 | Gp3 | g.chr19:17212993G>A  | Missense Mutation | MYO9B   | p.E156K  | myosin IXB                            | 59 (0.00)  | 107 (0.87) | 2.32 |
| 11-14 | Gp3 | g.chr1:203054786C>A  | Nonsense Mutation | MYOG    | p.E102*  | myogenin (myogenic factor 34)         | 0 (0.00)   | 142 (0.30) | 0.79 |
| 11-14 | Gp3 | g.chr1:203054787G>A  | Silent            | MYOG    | p.F101F  | myogenin (myogenic factor 33)         | 0 (0.00)   | 143 (0.29) | 0.76 |
| 11-14 | Gp3 | g.chr1:203054811C>T  | Silent            | MYOG    | p.R93R   | myogenin (myogenic factor 17)         | 0 (0.00)   | 114 (0.23) | 0.61 |
| 11-14 | Gp3 | g.chr8:2040348G>C    | Splice Site       | MYOM2   | p.R668T  | myomesin 2                            | 34 (0.00)  | 25 (0.92)  | 2.45 |
| 11-14 | Gp3 | g.chr9:130826001T>C  | Missense Mutation | NAIF1   | p.I230M  | nuclear apoptosis inducible factor 37 | 0 (0.00)   | 181 (0.15) | 0.40 |
| 11-14 | Gp3 | g.chr1:201687605G>T  | Missense Mutation | NAV1    | p.W329C  | neuron navigator 1                    | 23 (0.00)  | 165 (0.15) | 0.39 |
| 11-14 | Gp3 | g.chr13:35770326G>C  | Silent            | NBEA    | p.V1748V | neurobeachin                          | 142 (0.00) | 14 (0.93)  | 1.77 |



|       |     |                     |                   |            |          |                            |            |            |      |
|-------|-----|---------------------|-------------------|------------|----------|----------------------------|------------|------------|------|
| 11-14 | Gp3 | g.chr3:47039698G>A  | Missense Mutation | NBEAL2     | p.D1034N | neurobeachin-like 2        | 20 (0.00)  | 61 (0.18)  | 0.48 |
| 11-14 | Gp3 | g.chr20:44691488G>C | Silent            | NCOA5      | p.A397A  | nuclear receptor coactiv   | 61 (0.00)  | 65 (0.18)  | 0.49 |
| 11-14 | Gp3 | g.chr11:67379384C>A | Missense Mutation | NDUFV1     | p.A366D  | NADH dehydrogenase (       | 16 (0.00)  | 79 (0.41)  | 1.08 |
| 11-14 | Gp3 | g.chr11:67379391C>A | Silent            | NDUFV1     | p.A368A  | NADH dehydrogenase (       | 16 (0.00)  | 82 (0.20)  | 0.52 |
| 11-14 | Gp3 | g.chr8:24813106G>T  | RNA               | NEFL       |          | neurofilament, light poly  | 72 (0.01)  | 464 (0.20) | 0.54 |
| 11-14 | Gp3 | g.chr3:52773506C>T  | Silent            | NEK4       | p.L700L  | NIMA-related kinase 4      | 87 (0.00)  | 16 (0.50)  | 1.33 |
| 11-14 | Gp3 | g.chr4:1985168G>T   | Missense Mutation | NELFA      | p.L489M  | negative elongation fact   | 78 (0.00)  | 52 (0.52)  | 1.38 |
| 11-14 | Gp3 | g.chr17:46136803C>A | Missense Mutation | NFE2L1     | p.L696M  | nuclear factor, erythroid  | 19 (0.00)  | 60 (0.17)  | 0.44 |
| 11-14 | Gp3 | g.chr6:44229470G>C  | Missense Mutation | NFKBIE     | p.A334G  | nuclear factor of kappa    | 127 (0.00) | 187 (0.14) | 0.39 |
| 11-14 | Gp3 | g.chr2:233756155C>A | Missense Mutation | NGEF       | p.E303D  | neuronal guanine nuclec    | 26 (0.00)  | 70 (0.21)  | 0.57 |
| 11-14 | Gp3 | g.chr20:25472010C>T | Missense Mutation | NINL       | p.E488K  | ninein-like                | 21 (0.00)  | 58 (0.29)  | 0.78 |
| 11-14 | Gp3 | g.chr19:54314343C>A | Missense Mutation | NLRP12     | p.Q190H  | NLR family, pyrin dom      | 28 (0.00)  | 134 (0.16) | 0.42 |
| 11-14 | Gp3 | g.chr19:55451431G>A | Silent            | NLRP7      | p.V252V  | NLR family, pyrin dom      | 38 (0.00)  | 30 (0.37)  | 0.98 |
| 11-14 | Gp3 | g.chr16:449402G>T   | Missense Mutation | NME4       | p.E83D   | NME/NM23 nucleoside        | 86 (0.00)  | 202 (0.39) | 1.03 |
| 11-14 | Gp3 | g.chr1:881901T>C    | Missense Mutation | NOC2L      | p.K562E  | nucleolar complex assoc    | 29 (0.00)  | 45 (0.16)  | 0.41 |
| 11-14 | Gp3 | g.chr16:50733425T>C | Missense Mutation | NOD2       | p.F34L   | nucleotide-binding oligc   | 100 (0.00) | 518 (0.16) | 0.42 |
| 11-14 | Gp3 | g.chr16:50744876C>A | Missense Mutation | NOD2       | p.H352N  | nucleotide-binding oligc   | 18 (0.00)  | 52 (0.19)  | 0.51 |
| 11-14 | Gp3 | g.chr5:175815530G>T | Missense Mutation | NOP16      | p.A4D    | NOP16 nucleolar protei     | 40 (0.00)  | 393 (0.15) | 0.41 |
| 11-14 | Gp3 | g.chr19:36341975G>T | Silent            | NPHS1      | p.L138L  | nephrosis 1, congenital,   | 25 (0.00)  | 14 (0.36)  | 0.95 |
| 11-14 | Gp3 | g.chr5:32712163C>G  | Missense Mutation | NPR3       | p.P94R   | natriuretic peptide recep  | 27 (0.00)  | 178 (0.20) | 0.54 |
| 11-14 | Gp3 | g.chr22:39222703G>T | Silent            | NPTXR      | p.I300I  | neuronal pentraxin rece    | 20 (0.00)  | 119 (0.16) | 0.43 |
| 11-14 | Gp3 | g.chr10:83635799C>A | Missense Mutation | NRG3       | p.L235I  | neuregulin 3               | 16 (0.00)  | 188 (0.78) | 2.09 |
| 11-14 | Gp3 | g.chr2:206628456G>C | Silent            | NRP2       | p.R701R  | neuropilin 2               | 36 (0.00)  | 90 (0.99)  | 2.64 |
| 11-14 | Gp3 | g.chr11:64416288G>T | Silent            | NRXN2      | p.A1067A | neurexin 2                 | 25 (0.00)  | 165 (0.34) | 0.91 |
| 11-14 | Gp3 | g.chr17:73126892A>G | Missense Mutation | NT5C       | p.V136A  | 5', 3'-nucleotidase, cytos | 101 (0.01) | 368 (0.37) | 0.99 |
| 11-14 | Gp3 | g.chr11:71724037C>A | Missense Mutation | NUMA1      | p.E1504D | nuclear mitotic apparatus  | 44 (0.00)  | 113 (0.30) | 0.80 |
| 11-14 | Gp3 | g.chr11:71724085C>G | Missense Mutation | NUMA1      | p.E1488D | nuclear mitotic apparatus  | 67 (0.00)  | 151 (0.36) | 0.95 |
| 11-14 | Gp3 | g.chr11:71724107G>A | Missense Mutation | NUMA1      | p.A1481V | nuclear mitotic apparatus  | 104 (0.00) | 465 (0.15) | 0.40 |
| 11-14 | Gp3 | g.chr11:71725898G>T | Missense Mutation | NUMA1      | p.A884E  | nuclear mitotic apparatus  | 39 (0.00)  | 99 (0.57)  | 1.51 |
| 11-14 | Gp3 | g.chr3:13381426G>T  | Silent            | NUP210     | p.I1133I | nucleoporin 210kDa         | 26 (0.00)  | 21 (0.71)  | 1.90 |
| 11-14 | Gp3 | g.chr9:134074179C>T | Silent            | NUP214     | p.S1766S | nucleoporin 214kDa         | 132 (0.00) | 89 (0.22)  | 0.60 |
| 11-14 | Gp3 | g.chr19:50412855C>A | Missense Mutation | NUP62      | p.Q70H   | nucleoporin 62kDa          | 15 (0.00)  | 187 (0.18) | 0.47 |
| 11-14 | Gp3 | g.chr10:88973937G>T | RNA               | NUTM2A-AS1 |          | NUTM2A antisense RN        | 31 (0.00)  | 101 (0.37) | 0.98 |
| 11-14 | Gp3 | g.chr17:722742G>C   | Missense Mutation | NXN        | p.L253V  | nucleoredoxin              | 37 (0.00)  | 103 (0.27) | 0.72 |
| 11-14 | Gp3 | g.chr2:226446947A>G | Missense Mutation | NYAP2      | p.K272E  | neuronal tyrosine-phosp    | 46 (0.00)  | 304 (0.48) | 1.28 |

|       |     |                      |                   |          |          |                                     |            |      |
|-------|-----|----------------------|-------------------|----------|----------|-------------------------------------|------------|------|
| 11-14 | Gp3 | g.chr9:138440558G>A  | Silent            | OBP2A    | p.R131R  | odorant binding protein 15 (0.00)   | 103 (0.24) | 0.65 |
| 11-14 | Gp3 | g.chr1:228467937G>T  | Missense Mutation | OBSCN    | p.W3003L | obscurin, cytoskeletal cε27 (0.00)  | 37 (0.78)  | 1.45 |
| 11-14 | Gp3 | g.chr1:228558791C>G  | Missense Mutation | OBSCN    | p.P7728R | obscurin, cytoskeletal cε21 (0.00)  | 52 (0.44)  | 0.82 |
| 11-14 | Gp3 | g.chr9:127561627G>T  | Nonsense Mutation | OLFML2A  | p.E176*  | olfactomedin-like 2A 34 (0.00)      | 152 (0.18) | 0.47 |
| 11-14 | Gp3 | g.chr9:125563187G>T  | Missense Mutation | OR1K1    | p.Q262H  | olfactory receptor, famil51 (0.00)  | 185 (0.39) | 1.04 |
| 11-14 | Gp3 | g.chr1:248263582G>T  | Missense Mutation | OR2L13   | p.R302I  | olfactory receptor, famil35 (0.00)  | 25 (0.32)  | 0.85 |
| 11-14 | Gp3 | g.chr12:122079379T>A | Missense Mutation | ORAI1    | p.F248I  | ORAI calcium release-a 18 (0.00)    | 33 (0.18)  | 0.48 |
| 11-14 | Gp3 | g.chr2:26683876G>C   | Missense Mutation | OTOF     | p.N1852K | otoflerin 17 (0.00)                 | 24 (0.54)  | 1.44 |
| 11-14 | Gp3 | g.chr2:42990470G>T   | Missense Mutation | OXER1    | p.L284M  | oxoeicosanoid (OXE) re 17 (0.00)    | 89 (0.16)  | 0.42 |
| 11-14 | Gp3 | g.chr17:3806901C>T   | Silent            | P2RX1    | p.E183E  | purinergic receptor P2X 29 (0.00)   | 214 (0.17) | 0.45 |
| 11-14 | Gp3 | g.chr17:79805203G>C  | Missense Mutation | P4HB     | p.N171K  | prolyl 4-hydroxylase, be43 (0.02)   | 140 (0.41) | 1.33 |
| 11-14 | Gp3 | g.chr3:142681141G>T  | Missense Mutation | PAQR9    | p.F346L  | progesterin and adipoQ re 31 (0.00) | 115 (0.45) | 1.47 |
| 11-14 | Gp3 | g.chr3:142681367G>C  | Missense Mutation | PAQR9    | p.P271R  | progesterin and adipoQ re 59 (0.00) | 470 (0.29) | 0.94 |
| 11-14 | Gp3 | g.chr8:145059782C>A  | Silent            | PARP10   | p.L157L  | poly (ADP-ribose) poly127 (0.00)    | 386 (0.22) | 0.59 |
| 11-14 | Gp3 | g.chr3:51978520T>C   | Missense Mutation | PARP3    | p.F150L  | poly (ADP-ribose) poly1176 (0.00)   | 200 (0.19) | 0.51 |
| 11-14 | Gp3 | g.chr21:47330873G>T  | Missense Mutation | PCBP3    | p.A145S  | poly(rC) binding proteir 27 (0.00)  | 84 (0.37)  | 0.98 |
| 11-14 | Gp3 | g.chr3:51992148C>A   | Missense Mutation | PCBP4    | p.G315V  | poly(rC) binding proteir 67 (0.00)  | 320 (0.35) | 0.93 |
| 11-14 | Gp3 | g.chr5:140248811C>G  | Missense Mutation | PCDHA11  | p.H41Q   | protocadherin alpha 11 128 (0.00)   | 86 (0.20)  | 0.53 |
| 11-14 | Gp3 | g.chr5:140262261C>A  | Missense Mutation | PCDHA13  | p.S136R  | protocadherin alpha 13 80 (0.00)    | 65 (0.20)  | 0.53 |
| 11-14 | Gp3 | g.chr5:140175836C>T  | Silent            | PCDHA2   | p.D429D  | protocadherin alpha 2 41 (0.00)     | 252 (0.44) | 1.16 |
| 11-14 | Gp3 | g.chr5:140216220C>G  | Missense Mutation | PCDHA7   | p.S751C  | protocadherin alpha 7 31 (0.00)     | 92 (0.26)  | 0.70 |
| 11-14 | Gp3 | g.chr5:140221074G>C  | Silent            | PCDHA8   | p.L56L   | protocadherin alpha 8 64 (0.00)     | 44 (0.16)  | 0.42 |
| 11-14 | Gp3 | g.chr5:140712533C>A  | Missense Mutation | PCDHGA1  | p.A761E  | protocadherin gamma st 19 (0.00)    | 18 (0.78)  | 2.07 |
| 11-14 | Gp3 | g.chr5:140800953G>C  | Silent            | PCDHGA11 | p.L53L   | protocadherin gamma st 36 (0.00)    | 45 (0.87)  | 2.31 |
| 11-14 | Gp3 | g.chr5:140801248C>T  | Nonsense Mutation | PCDHGA11 | p.R152*  | protocadherin gamma st 143 (0.00)   | 75 (0.96)  | 2.56 |
| 11-14 | Gp3 | g.chr5:140723623G>A  | Missense Mutation | PCDHGA3  | p.R8Q    | protocadherin gamma st 97 (0.00)    | 26 (0.54)  | 1.44 |
| 11-14 | Gp3 | g.chr5:140856608C>T  | Missense Mutation | PCDHGC3  | p.R309W  | protocadherin gamma st 49 (0.02)    | 61 (0.67)  | 1.79 |
| 11-14 | Gp3 | g.chr20:44575935T>A  | Missense Mutation | PCIF1    | p.F581I  | PDX1 C-terminal inhibi 53 (0.00)    | 235 (0.21) | 0.57 |
| 11-14 | Gp3 | g.chr7:94293399C>A   | Silent            | PEG10    | p.G177G  | paternally expressed 10 229 (0.00)  | 363 (0.50) | 1.63 |
| 11-14 | Gp3 | g.chr22:30976063C>A  | Silent            | PES1     | p.G243G  | pescadillo ribosomal bic 24 (0.00)  | 176 (0.30) | 0.80 |
| 11-14 | Gp3 | g.chr6:42934044G>C   | Missense Mutation | PEX6     | p.P746A  | peroxisomal biogenesis 18 (0.00)    | 45 (0.27)  | 0.71 |
| 11-14 | Gp3 | g.chr15:99512855G>T  | Missense Mutation | PGPEP1L  | p.T3N    | pyroglutamyl-peptidase 39 (0.03)    | 77 (0.30)  | 0.80 |
| 11-14 | Gp3 | g.chr11:607080C>A    | Missense Mutation | PHRF1    | p.Q541K  | PHD and ring finger dot 58 (0.00)   | 343 (0.77) | 2.04 |
| 11-14 | Gp3 | g.chr11:609393A>G    | Missense Mutation | PHRF1    | p.S1312G | PHD and ring finger dot 19 (0.00)   | 116 (0.25) | 0.67 |
| 11-14 | Gp3 | g.chr1:9775634C>G    | Missense Mutation | PIK3CD   | p.F59L   | phosphatidylinositol-4,5 15 (0.00)  | 179 (0.18) | 0.48 |

|       |     |                      |                   |          |          |                                     |            |      |
|-------|-----|----------------------|-------------------|----------|----------|-------------------------------------|------------|------|
| 11-14 | Gp3 | g.chr1:9777032C>A    | Missense Mutation | PIK3CD   | p.L266M  | phosphatidylinositol-4,5 51 (0.00)  | 238 (0.21) | 0.55 |
| 11-14 | Gp3 | g.chr7:106508234G>A  | Silent            | PIK3CG   | p.L76L   | phosphatidylinositol-4,5 22 (0.00)  | 93 (0.12)  | 0.41 |
| 11-14 | Gp3 | g.chr8:10623292A>G   | Silent            | PINX1    | p.I202I  | PIN2/TERF1 interacting 272 (0.00)   | 54 (0.20)  | 0.54 |
| 11-14 | Gp3 | g.chr17:6368073G>A   | Missense Mutation | PITPNM3  | p.R637W  | PITPNM family membe 61 (0.00)       | 51 (0.71)  | 1.88 |
| 11-14 | Gp3 | g.chr4:111542488C>G  | Silent            | PITX2    | p.V81V   | paired-like homeodomai 17 (0.00)    | 40 (0.38)  | 1.00 |
| 11-14 | Gp3 | g.chr16:2153463C>A   | Silent            | PKD1     | p.R2865R | polycystic kidney diseas 19 (0.00)  | 149 (0.46) | 1.22 |
| 11-14 | Gp3 | g.chr15:72492954G>T  | Silent            | PKM      | p.I450I  | pyruvate kinase, muscle 25 (0.00)   | 71 (0.59)  | 1.58 |
| 11-14 | Gp3 | g.chr12:33031142G>T  | Silent            | PKP2     | p.G224G  | plakophilin 2 27 (0.00)             | 59 (0.19)  | 0.50 |
| 11-14 | Gp3 | g.chr22:31536299C>G  | Silent            | PLA2G3   | p.L14L   | phospholipase A2, grouj 40 (0.00)   | 452 (0.18) | 0.47 |
| 11-14 | Gp3 | g.chr19:48588365T>A  | Missense Mutation | PLA2G4C  | p.L275F  | phospholipase A2, grouj 16 (0.00)   | 101 (0.15) | 0.40 |
| 11-14 | Gp3 | g.chr15:42363994C>A  | Missense Mutation | PLA2G4D  | p.E517D  | phospholipase A2, grouj 54 (0.00)   | 147 (0.18) | 0.49 |
| 11-14 | Gp3 | g.chr15:42375431C>A  | Missense Mutation | PLA2G4D  | p.A213S  | phospholipase A2, grouj 28 (0.00)   | 54 (0.44)  | 1.19 |
| 11-14 | Gp3 | g.chr15:42438097C>T  | Nonsense Mutation | PLA2G4F  | p.W513*  | phospholipase A2, grouj 54 (0.00)   | 102 (0.18) | 0.47 |
| 11-14 | Gp3 | g.chr19:40882517T>A  | Splice Site       | PLD3     | p.F341I  | phospholipase D family 64 (0.02)    | 293 (0.38) | 1.02 |
| 11-14 | Gp3 | g.chr14:65208320G>A  | Silent            | PLEKHG3  | p.V695V  | pleckstrin homology do 70 (0.00)    | 182 (0.23) | 0.60 |
| 11-14 | Gp3 | g.chr5:169633C>A     | Missense Mutation | PLEKHG4B | p.Q863K  | pleckstrin homology do 65 (0.00)    | 92 (0.14)  | 0.38 |
| 11-14 | Gp3 | g.chr1:16059185C>A   | Missense Mutation | PLEKHM2  | p.L962M  | pleckstrin homology do 44 (0.02)    | 214 (0.44) | 1.17 |
| 11-14 | Gp3 | g.chr19:4511850C>A   | Missense Mutation | PLIN4    | p.V694L  | perilipin 4 178 (0.00)              | 81 (0.20)  | 0.53 |
| 11-14 | Gp3 | g.chr3:126736316G>A  | Missense Mutation | PLXNA1   | p.V1109M | plexin A1 46 (0.00)                 | 485 (0.19) | 0.63 |
| 11-14 | Gp3 | g.chr3:48464992C>G   | Silent            | PLXNB1   | p.R343R  | plexin B1 28 (0.00)                 | 186 (0.17) | 0.44 |
| 11-14 | Gp3 | g.chr3:48465045G>T   | Missense Mutation | PLXNB1   | p.L326M  | plexin B1 23 (0.00)                 | 165 (0.24) | 0.63 |
| 11-14 | Gp3 | g.chr1:53542922C>T   | Silent            | PODN     | p.N262N  | podocan 106 (0.00)                  | 856 (0.24) | 0.64 |
| 11-14 | Gp3 | g.chr21:46703416C>T  | Missense Mutation | POFUT2   | p.V137I  | protein O-fucosyltransfe 218 (0.00) | 649 (0.33) | 0.88 |
| 11-14 | Gp3 | g.chr8:22105997C>G   | Missense Mutation | POLR3D   | p.L164V  | polymerase (RNA) III (144 (0.00)    | 130 (0.80) | 2.13 |
| 11-14 | Gp3 | g.chr16:22319488C>T  | Missense Mutation | POLR3E   | p.S36L   | polymerase (RNA) III (146 (0.02)    | 42 (0.33)  | 0.89 |
| 11-14 | Gp3 | g.chr7:75051269G>A   | Missense Mutation | POM121C  | p.P756S  | POM121 transmembran 23 (0.00)       | 107 (0.30) | 0.80 |
| 11-14 | Gp3 | g.chr22:21481051G>A  | Missense Mutation | POM121L7 | p.S292F  | POM121 transmembran 67 (0.00)       | 126 (0.98) | 2.60 |
| 11-14 | Gp3 | g.chr3:43122784G>T   | Missense Mutation | POMGNT2  | p.P47Q   | protein O-linked manno 48 (0.02)    | 362 (0.18) | 0.47 |
| 11-14 | Gp3 | g.chr5:149215908A>G  | Silent            | PPARGC1B | p.K630K  | peroxisome proliferator- 50 (0.00)  | 43 (0.77)  | 2.05 |
| 11-14 | Gp3 | g.chr11:70208236T>C  | Missense Mutation | PPFIA1   | p.L873S  | protein tyrosine phosph 107 (0.00)  | 43 (0.40)  | 1.05 |
| 11-14 | Gp3 | g.chr6:42974758G>T   | Silent            | PPP2R5D  | p.V144V  | protein phosphatase 2, r 47 (0.00)  | 48 (0.15)  | 0.39 |
| 11-14 | Gp3 | g.chr18:9550331G>C   | Missense Mutation | PPP4R1   | p.A786G  | protein phosphatase 4, r 78 (0.00)  | 144 (0.85) | 2.28 |
| 11-14 | Gp3 | g.chr10:103906794G>A | Missense Mutation | PPRC1    | p.A1349T | peroxisome proliferator- 15 (0.00)  | 68 (0.22)  | 0.59 |
| 11-14 | Gp3 | g.chr6:106553356C>A  | Missense Mutation | PRDM1    | p.P405T  | PR domain containing 1 21 (0.00)    | 39 (0.23)  | 0.62 |
| 11-14 | Gp3 | g.chr9:133542084A>G  | Missense Mutation | PRDM12   | p.K105E  | PR domain containing 1 18 (0.00)    | 22 (0.73)  | 1.94 |

|       |     |                     |                   |          |          |                          |            |            |      |
|-------|-----|---------------------|-------------------|----------|----------|--------------------------|------------|------------|------|
| 11-14 | Gp3 | g.chr21:43241425C>T | Silent            | PRDM15   | p.Q723Q  | PR domain containing 1   | 100 (0.00) | 345 (0.32) | 0.84 |
| 11-14 | Gp3 | g.chr21:43241499G>T | Missense Mutation | PRDM15   | p.R699S  | PR domain containing 1   | 135 (0.00) | 437 (0.36) | 0.95 |
| 11-14 | Gp3 | g.chr21:43242364C>G | Missense Mutation | PRDM15   | p.R634S  | PR domain containing 1   | 88 (0.00)  | 283 (0.19) | 0.50 |
| 11-14 | Gp3 | g.chr1:186277659G>A | Silent            | PRG4     | p.K936K  | proteoglycan 4           | 183 (0.00) | 358 (0.28) | 0.76 |
| 11-14 | Gp3 | g.chr2:219694842C>G | Missense Mutation | PRKAG3   | p.Q164H  | protein kinase, AMP-acti | 45 (0.00)  | 290 (0.29) | 0.77 |
| 11-14 | Gp3 | g.chr17:1554983C>A  | Missense Mutation | PRPF8    | p.V2157L | pre-mRNA processing f    | 195 (0.00) | 73 (0.85)  | 2.26 |
| 11-14 | Gp3 | g.chr16:855666C>A   | Missense Mutation | PRR25    | p.S75Y   | proline rich 25          | 22 (0.00)  | 175 (0.19) | 0.52 |
| 11-14 | Gp3 | g.chr10:696969G>A   | Silent            | PRR26    | p.L154L  | proline rich 26          | 30 (0.00)  | 41 (0.32)  | 0.85 |
| 11-14 | Gp3 | g.chr9:134357757G>A | Splice Site       | PRRC2B   |          | proline-rich coiled-coil | 165 (0.00) | 275 (0.52) | 1.40 |
| 11-14 | Gp3 | g.chr16:67943307C>T | Missense Mutation | PSKH1    | p.L219F  | protein serine kinase H  | 115 (0.00) | 67 (0.25)  | 0.68 |
| 11-14 | Gp3 | g.chr7:103007874G>A | Missense Mutation | PSMC2    | p.D287N  | proteasome (prosome, n   | 31 (0.00)  | 72 (0.35)  | 1.21 |
| 11-14 | Gp3 | g.chr11:479126C>A   | Missense Mutation | PTDSS2   | p.L137M  | phosphatidylserine synt  | 181 (0.00) | 226 (0.20) | 0.53 |
| 11-14 | Gp3 | g.chr11:486948G>T   | Missense Mutation | PTDSS2   | p.D149Y  | phosphatidylserine synt  | 119 (0.00) | 123 (0.22) | 0.59 |
| 11-14 | Gp3 | g.chr10:89721169G>T | Intron            | PTEN     |          | phosphatase and tensin   | 138 (0.00) | 42 (0.50)  | 1.33 |
| 11-14 | Gp3 | g.chr3:46940207C>A  | Missense Mutation | PTH1R    | p.L232M  | parathyroid hormone 1    | 117 (0.00) | 175 (0.16) | 0.43 |
| 11-14 | Gp3 | g.chr6:43098046G>T  | Silent            | PTK7     | p.R183R  | protein tyrosine kinase  | 727 (0.00) | 103 (0.19) | 0.52 |
| 11-14 | Gp3 | g.chr19:50357730G>C | Missense Mutation | PTOV1    | p.G80A   | prostate tumor overexpr  | 24 (0.00)  | 164 (0.38) | 1.01 |
| 11-14 | Gp3 | g.chr4:87685868A>G  | Missense Mutation | PTPN13   | p.I1380M | protein tyrosine phosph  | 44 (0.00)  | 15 (0.53)  | 1.42 |
| 11-14 | Gp3 | g.chr1:214556782G>T | Missense Mutation | PTPN14   | p.P806T  | protein tyrosine phosph  | 21 (0.00)  | 181 (0.97) | 2.59 |
| 11-14 | Gp3 | g.chr14:88946502C>A | Missense Mutation | PTPN21   | p.D425Y  | protein tyrosine phosph  | 31 (0.00)  | 15 (0.93)  | 2.49 |
| 11-14 | Gp3 | g.chr11:18762158C>A | Nonsense Mutation | PTPN5    | p.E279*  | protein tyrosine phosph  | 117 (0.00) | 97 (0.19)  | 0.49 |
| 11-14 | Gp3 | g.chr12:70964938G>T | Missense Mutation | PTPRB    | p.P992T  | protein tyrosine phosph  | 60 (0.02)  | 345 (0.28) | 0.75 |
| 11-14 | Gp3 | g.chr1:44085163C>G  | Silent            | PTPRF    | p.A1608A | protein tyrosine phosph  | 28 (0.00)  | 17 (0.47)  | 1.25 |
| 11-14 | Gp3 | g.chr2:25016153G>T  | Silent            | PTRHD1   | p.R32R   | peptidyl-tRNA hydrolas   | 38 (0.00)  | 28 (0.68)  | 1.81 |
| 11-14 | Gp3 | g.chr3:49095262G>T  | Missense Mutation | QRICH1   | p.T124N  | glutamine-rich 1         | 36 (0.00)  | 193 (0.45) | 1.20 |
| 11-14 | Gp3 | g.chr19:10822865C>A | Missense Mutation | QTRT1    | p.F225L  | queuine tRNA-ribosyltr   | 20 (0.00)  | 130 (0.17) | 0.45 |
| 11-14 | Gp3 | g.chr2:238486800T>C | Splice Site       | RAB17    |          | RAB17, member RAS c      | 36 (0.00)  | 37 (0.27)  | 0.72 |
| 11-14 | Gp3 | g.chr3:51697005T>C  | Missense Mutation | RAD54L2  | p.S1325P | RAD54-like 2 (S. cerevi  | 112 (0.00) | 29 (0.90)  | 2.39 |
| 11-14 | Gp3 | g.chr17:17700952C>T | Nonsense Mutation | RAI1     | p.Q1564* | retinoic acid induced 1  | 51 (0.02)  | 323 (0.26) | 0.69 |
| 11-14 | Gp3 | g.chrX:17819373G>T  | Missense Mutation | RAI2     | p.P253H  | retinoic acid induced 2  | 37 (0.00)  | 105 (0.26) | 0.43 |
| 11-14 | Gp3 | g.chr9:129928399G>T | Missense Mutation | RALGPS1  | p.G221V  | Ral GEF with PH doma     | 43 (0.00)  | 27 (0.81)  | 2.17 |
| 11-14 | Gp3 | g.chr7:44076343G>A  | RNA               | RASA4CP  |          | RAS p21 protein activat  | 33 (0.00)  | 37 (0.59)  | 2.04 |
| 11-14 | Gp3 | g.chr10:43697339C>T | Missense Mutation | RASGEF1A | p.E134K  | RasGEF domain family,    | 19 (0.00)  | 75 (0.61)  | 1.64 |
| 11-14 | Gp3 | g.chr17:34068216G>C | Silent            | RASL10B  | p.L168L  | RAS-like, family 10, m   | 16 (0.00)  | 45 (0.18)  | 0.47 |
| 11-14 | Gp3 | g.chr13:48892938G>A | Intron            | RB1      |          | retinoblastoma 1         | 21 (0.00)  | 172 (0.63) | 1.21 |

|       |     |                     |                   |                |          |                                           |            |      |
|-------|-----|---------------------|-------------------|----------------|----------|-------------------------------------------|------------|------|
| 11-14 | Gp3 | g.chr1:110882754C>G | Missense Mutation | RBM15          | p.R243G  | RNA binding motif prot 19 (0.00)          | 144 (0.21) | 0.56 |
| 11-14 | Gp3 | g.chr7:155556590C>T | Missense Mutation | RBM33          | p.R1022C | RNA binding motif prot 23 (0.00)          | 173 (0.24) | 0.85 |
| 11-14 | Gp3 | g.chr11:66612699T>A | Missense Mutation | RCE1           | p.L228M  | Ras converting CAAX $\epsilon$ 18 (0.00)  | 50 (0.58)  | 1.55 |
| 11-14 | Gp3 | g.chr11:66612701G>A | Silent            | RCE1           | p.L228L  | Ras converting CAAX $\epsilon$ 16 (0.00)  | 50 (0.18)  | 0.48 |
| 11-14 | Gp3 | g.chr11:63681758G>T | Missense Mutation | RCOR2          | p.P217H  | REST corepressor 2 29 (0.00)              | 52 (0.40)  | 1.08 |
| 11-14 | Gp3 | g.chr14:24648636C>A | Missense Mutation | REC8           | p.S428Y  | REC8 meiotic recombin 91 (0.00)           | 79 (0.89)  | 2.36 |
| 11-14 | Gp3 | g.chr17:73659025G>A | Missense Mutation | RECQL5         | p.S102L  | RecQ protein-like 5 59 (0.00)             | 45 (0.89)  | 2.37 |
| 11-14 | Gp3 | g.chr10:43612116G>C | Missense Mutation | RET            | p.A741P  | ret proto-oncogene 132 (0.00)             | 196 (0.84) | 2.23 |
| 11-14 | Gp3 | g.chr2:108478115C>G | Missense Mutation | RGPD4          | p.C708W  | RANBP2-like and GRIIF 152 (0.00)          | 17 (0.41)  | 1.10 |
| 11-14 | Gp3 | g.chr4:3319338G>T   | Nonsense Mutation | RGS12          | p.E481*  | regulator of G-protein $\alpha$ 25 (0.00) | 54 (0.22)  | 0.59 |
| 11-14 | Gp3 | g.chr4:3432202G>T   | Nonsense Mutation | RGS12          | p.E1212* | regulator of G-protein $\alpha$ 66 (0.00) | 79 (0.18)  | 0.47 |
| 11-14 | Gp3 | g.chr9:116260312G>A | Silent            | RGS3           | p.L283L  | regulator of G-protein $\alpha$ 25 (0.00) | 30 (0.83)  | 2.22 |
| 11-14 | Gp3 | g.chr16:108450C>T   | Silent            | RHBDF1         | p.V819V  | rhomboid 5 homolog 1 (104 (0.00)          | 46 (0.50)  | 1.33 |
| 11-14 | Gp3 | g.chr16:108452C>A   | Missense Mutation | RHBDF1         | p.V819L  | rhomboid 5 homolog 1 (105 (0.00)          | 44 (0.23)  | 0.61 |
| 11-14 | Gp3 | g.chr17:30647985G>C | Missense Mutation | RHBDL3         | p.E220Q  | rhomboid, veinlet-like 3 17 (0.00)        | 184 (0.24) | 0.65 |
| 11-14 | Gp3 | g.chr15:41165686C>A | Missense Mutation | RHOV           | p.R94L   | ras homolog family mer 34 (0.00)          | 196 (0.28) | 0.73 |
| 11-14 | Gp3 | g.chr19:39361561C>A | Missense Mutation | RINL           | p.G225W  | Ras and Rab interactor-125 (0.00)         | 377 (0.16) | 0.42 |
| 11-14 | Gp3 | g.chr6:7404673G>T   | Missense Mutation | RIOK1          | p.V293F  | RIO kinase 1 48 (0.00)                    | 36 (0.19)  | 0.52 |
| 11-14 | Gp3 | g.chr15:89760355G>T | Silent            | RLBP1          | p.L114L  | retinaldehyde binding p 17 (0.00)         | 103 (0.28) | 0.75 |
| 11-14 | Gp3 | g.chr16:67679928G>T | Missense Mutation | RLTPR          | p.C65F   | RGD motif, leucine rich 24 (0.00)         | 280 (0.27) | 0.72 |
| 11-14 | Gp3 | g.chr5:177570950G>T | Missense Mutation | RMND5B         | p.V179F  | required for meiotic nuc 76 (0.00)        | 146 (0.17) | 0.46 |
| 11-14 | Gp3 | g.chr3:49735335C>G  | Missense Mutation | RNF123         | p.N120K  | ring finger protein 123 101 (0.00)        | 21 (0.76)  | 2.03 |
| 11-14 | Gp3 | g.chr3:49739767G>A  | Splice Site       | RNF123         | p.G520S  | ring finger protein 123 44 (0.00)         | 51 (0.35)  | 0.94 |
| 11-14 | Gp3 | g.chr17:4848020C>A  | Missense Mutation | RNF167         | p.S254R  | ring finger protein 167 24 (0.00)         | 215 (0.65) | 1.74 |
| 11-14 | Gp3 | g.chr5:34183037G>T  | RNA               | RP11-1023L17.1 |          | 346 (0.00)                                | 118 (0.41) | 1.08 |
| 11-14 | Gp3 | g.chr4:89208850G>T  | lincRNA           | RP11-10L7.1    |          | 21 (0.00)                                 | 107 (0.17) | 0.45 |
| 11-14 | Gp3 | g.chr16:12027568C>T | Splice Site       | RP11-166B2.1   | p.G98G   | 163 (0.00)                                | 254 (0.66) | 1.76 |
| 11-14 | Gp3 | g.chr16:2546436T>C  | Missense Mutation | RP11-20I23.1   | p.V96A   | 18 (0.00)                                 | 138 (0.24) | 0.64 |
| 11-14 | Gp3 | g.chr16:2546535C>T  | Missense Mutation | RP11-20I23.1   | p.S129F  | 16 (0.00)                                 | 81 (0.72)  | 1.91 |
| 11-14 | Gp3 | g.chr6:73935024G>A  | Missense Mutation | RP11-257K9.8   | p.S139F  | 32 (0.00)                                 | 293 (0.29) | 0.76 |
| 11-14 | Gp3 | g.chr1:149673394G>A | lincRNA           | RP11-353N4.4   |          | 15 (0.00)                                 | 27 (0.52)  | 1.38 |
| 11-14 | Gp3 | g.chr12:13174454G>A | lincRNA           | RP11-377D9.3   |          | 124 (0.00)                                | 345 (0.14) | 0.39 |
| 11-14 | Gp3 | g.chr10:52419547C>A | RNA               | RP11-564C4.6   |          | 61 (0.02)                                 | 444 (0.42) | 1.13 |
| 11-14 | Gp3 | g.chr1:89122750G>T  | RNA               | RP11-76N22.2   |          | 16 (0.00)                                 | 131 (0.24) | 0.65 |
| 11-14 | Gp3 | g.chr8:37593816G>A  | Missense Mutation | RP11-863K10.   | p.S67F   | 87 (0.00)                                 | 69 (0.17)  | 0.46 |

|       |     |                      |                   |              |          |                          |             |            |      |
|-------|-----|----------------------|-------------------|--------------|----------|--------------------------|-------------|------------|------|
| 11-14 | Gp3 | g.chr16:72762960C>G  | RNA               | RP5-991G20.1 |          |                          | 133 (0.00)  | 45 (0.16)  | 0.41 |
| 11-14 | Gp3 | g.chr11:8704792G>T   | Missense Mutation | RPL27A       | p.S16I   | ribosomal protein L27a   | 90 (0.00)   | 338 (0.25) | 0.65 |
| 11-14 | Gp3 | g.chr1:150418846C>A  | Missense Mutation | RPRD2        | p.A280E  | regulation of nuclear pr | 153 (0.00)  | 99 (0.30)  | 0.81 |
| 11-14 | Gp3 | g.chr3:51968675G>C   | Silent            | RRP9         | p.A384A  | ribosomal RNA process    | 22 (0.00)   | 336 (0.19) | 0.52 |
| 11-14 | Gp3 | g.chr20:948736G>T    | Nonsense Mutation | RSPO4        | p.S42*   | R-spondin 4              | 19 (0.00)   | 34 (0.21)  | 0.55 |
| 11-14 | Gp3 | g.chr14:101349253C>T | Missense Mutation | RTL1         | p.E625K  | retrotransposon-like 1   | 53 (0.00)   | 12 (0.83)  | 2.22 |
| 11-14 | Gp3 | g.chr3:186917726G>T  | Silent            | RTP1         | p.A220A  | receptor (chemosensory   | 42 (0.00)   | 366 (0.19) | 0.61 |
| 11-14 | Gp3 | g.chr17:42393753G>C  | Splice Site       | RUNDC3A      | p.L318L  | RUN domain containing    | 16 (0.00)   | 128 (0.38) | 1.00 |
| 11-14 | Gp3 | g.chr19:39052052C>T  | Silent            | RYR1         | p.F4194F | ryanodine receptor 1 (sk | 17 (0.00)   | 114 (0.41) | 1.10 |
| 11-14 | Gp3 | g.chr19:39868342C>A  | Missense Mutation | SAMD4B       | p.P441H  | sterile alpha motif doma | 22 (0.00)   | 173 (0.18) | 0.48 |
| 11-14 | Gp3 | g.chr11:65732567G>A  | Silent            | SART1        | p.A144A  | squamous cell carcinom   | 18 (0.00)   | 120 (0.72) | 1.91 |
| 11-14 | Gp3 | g.chr11:65744512G>T  | Missense Mutation | SART1        | p.D629Y  | squamous cell carcinom   | 18 (0.00)   | 235 (0.27) | 0.73 |
| 11-14 | Gp3 | g.chr8:27528493G>A   | Silent            | SCARA3       | p.P482P  | scavenger receptor class | 15 (0.00)   | 62 (0.21)  | 0.56 |
| 11-14 | Gp3 | g.chr4:54231978C>T   | Missense Mutation | SCFD2        | p.R44H   | sec1 family domain con   | 37 (0.00)   | 100 (0.80) | 2.13 |
| 11-14 | Gp3 | g.chr19:35530043C>A  | Silent            | SCN1B        | p.I157I  | sodium channel, voltage  | 91 (0.00)   | 38 (0.71)  | 1.89 |
| 11-14 | Gp3 | g.chr17:62018666A>G  | Missense Mutation | SCN4A        | p.I1659T | sodium channel, voltage  | 94 (0.00)   | 172 (0.38) | 1.01 |
| 11-14 | Gp3 | g.chr17:71394514C>G  | Missense Mutation | SDK2         | p.E1050Q | sidekick cell adhesion r | 24 (0.00)   | 58 (0.16)  | 0.41 |
| 11-14 | Gp3 | g.chr12:113835115C>G | Missense Mutation | SDS          | p.G170R  | serine dehydratase       | 17 (0.00)   | 67 (0.40)  | 1.07 |
| 11-14 | Gp3 | g.chr9:139368735C>G  | Missense Mutation | SEC16A       | p.Q933H  | SEC16 homolog A (S. c    | 41 (0.00)   | 72 (0.71)  | 1.89 |
| 11-14 | Gp3 | g.chr1:177906422G>T  | Silent            | SEC16B       | p.G810G  | SEC16 homolog B (S. c    | 21 (0.00)   | 180 (0.62) | 1.66 |
| 11-14 | Gp3 | g.chr3:50222909C>T   | Missense Mutation | SEMA3F       | p.P497L  | sema domain, immunog     | 15 (0.00)   | 25 (0.28)  | 0.75 |
| 11-14 | Gp3 | g.chr19:4550167G>T   | Silent            | SEMA6B       | p.G413G  | sema domain, transmem    | 19 (0.00)   | 91 (0.20)  | 0.53 |
| 11-14 | Gp3 | g.chr17:75488708C>T  | Silent            | SEPT9        | p.T455T  | septin 9                 | 23 (0.00)   | 89 (0.16)  | 0.42 |
| 11-14 | Gp3 | g.chr18:61390658G>T  | RNA               | SERPINB11    |          | serpin peptidase inhibi  | 59 (0.00)   | 33 (0.70)  | 2.22 |
| 11-14 | Gp3 | g.chr2:235950150G>C  | Missense Mutation | SH3BP4       | p.S246T  | SH3-domain binding pr    | 140 (0.00)  | 260 (0.30) | 0.79 |
| 11-14 | Gp3 | g.chr10:105362335C>A | Silent            | SH3PXD2A     | p.V880V  | SH3 and PX domains       | 2/15 (0.00) | 10 (0.60)  | 1.60 |
| 11-14 | Gp3 | g.chr4:8242567T>C    | Missense Mutation | SH3TC1       | p.F1299S | SH3 domain and tetratri  | 20 (0.00)   | 97 (0.16)  | 0.44 |
| 11-14 | Gp3 | g.chr5:148407269A>G  | Silent            | SH3TC2       | p.L669L  | SH3 domain and tetratri  | 92 (0.00)   | 149 (0.21) | 0.55 |
| 11-14 | Gp3 | g.chr1:154473961G>T  | Missense Mutation | SHE          | p.S181Y  | Src homology 2 domain    | 56 (0.00)   | 62 (0.32)  | 0.58 |
| 11-14 | Gp3 | g.chr4:42403309C>A   | Silent            | SHISA3       | p.G186G  | shisa family member 3    | 25 (0.00)   | 220 (0.28) | 0.74 |
| 11-14 | Gp3 | g.chr19:41096635G>C  | Splice Site       | SHKBP1       |          | SH3KBP1 binding prote    | 55 (0.00)   | 68 (0.31)  | 0.82 |
| 11-14 | Gp3 | g.chr19:41096714C>A  | Nonsense Mutation | SHKBP1       | p.S616*  | SH3KBP1 binding prote    | 16 (0.00)   | 101 (0.35) | 0.92 |
| 11-14 | Gp3 | g.chr17:3514214C>A   | Silent            | SHPK         | p.V359V  | sedoheptulokinase        | 40 (0.00)   | 18 (0.50)  | 1.33 |
| 11-14 | Gp3 | g.chr19:16962273C>G  | Missense Mutation | SIN3B        | p.H259Q  | SIN3 transcription regul | 64 (0.02)   | 399 (0.33) | 0.88 |
| 11-14 | Gp3 | g.chr17:79870413C>A  | Missense Mutation | SIRT7        | p.C361F  | sirtuin 7                | 18 (0.00)   | 338 (0.26) | 0.86 |

|       |     |                      |                   |          |          |                           |             |            |      |
|-------|-----|----------------------|-------------------|----------|----------|---------------------------|-------------|------------|------|
| 11-14 | Gp3 | g.chr5:1076888C>A    | Missense Mutation | SLC12A7  | p.A557S  | solute carrier family 12  | 18 (0.00)   | 41 (0.34)  | 0.91 |
| 11-14 | Gp3 | g.chr7:100457779C>G  | Missense Mutation | SLC12A9  | p.I381M  | solute carrier family 12, | 71 (0.00)   | 217 (0.35) | 1.17 |
| 11-14 | Gp3 | g.chr17:26824189C>T  | Missense Mutation | SLC13A2  | p.P561S  | solute carrier family 13  | 27 (0.00)   | 215 (0.26) | 0.68 |
| 11-14 | Gp3 | g.chr11:2943341G>A   | Missense Mutation | SLC22A18 | p.G292S  | solute carrier family 22, | 49 (0.00)   | 37 (0.97)  | 2.59 |
| 11-14 | Gp3 | g.chr8:23429152C>T   | Silent            | SLC25A37 | p.N267N  | solute carrier family 25  | 58 (0.00)   | 83 (0.16)  | 0.42 |
| 11-14 | Gp3 | g.chr3:48667590C>A   | Splice Site       | SLC26A6  | p.A407S  | solute carrier family 26  | 16 (0.00)   | 212 (0.15) | 0.39 |
| 11-14 | Gp3 | g.chr3:48667591C>G   | Splice Site       | SLC26A6  |          | solute carrier family 26  | 16 (0.00)   | 213 (0.14) | 0.38 |
| 11-14 | Gp3 | g.chr19:59011980T>C  | Missense Mutation | SLC27A5  | p.I426V  | solute carrier family 27  | 20 (0.00)   | 49 (0.37)  | 0.98 |
| 11-14 | Gp3 | g.chr10:73121911C>G  | Missense Mutation | SLC29A3  | p.A325G  | solute carrier family 29  | 40 (0.00)   | 190 (0.48) | 1.29 |
| 11-14 | Gp3 | g.chr5:139947295C>A  | Missense Mutation | SLC35A4  | p.P181T  | solute carrier family 35, | 38 (0.03)   | 233 (0.30) | 0.55 |
| 11-14 | Gp3 | g.chr11:45832618T>C  | Missense Mutation | SLC35C1  | p.F276S  | solute carrier family 35  | 26 (0.00)   | 52 (0.40)  | 1.08 |
| 11-14 | Gp3 | g.chr11:124955510C>A | Silent            | SLC37A2  | p.S455S  | solute carrier family 37  | 56 (0.02)   | 190 (0.15) | 0.39 |
| 11-14 | Gp3 | g.chr3:50255313G>T   | RNA               | SLC38A3  |          | solute carrier family 38, | 66 (0.00)   | 22 (0.64)  | 1.70 |
| 11-14 | Gp3 | g.chr3:50256283C>G   | RNA               | SLC38A3  |          | solute carrier family 38, | 37 (0.00)   | 224 (0.59) | 1.58 |
| 11-14 | Gp3 | g.chr12:56630717G>C  | Missense Mutation | SLC39A5  | p.A404P  | solute carrier family 39  | 157 (0.00)  | 225 (0.79) | 2.10 |
| 11-14 | Gp3 | g.chr16:24902315C>A  | Missense Mutation | SLC5A11  | p.P264T  | solute carrier family 5   | (ε69 (0.00) | 272 (0.36) | 0.97 |
| 11-14 | Gp3 | g.chr1:110709596G>T  | Missense Mutation | SLC6A17  | p.E15D   | solute carrier family 6   | (τ45 (0.00) | 96 (0.36)  | 0.97 |
| 11-14 | Gp3 | g.chr14:70512917G>T  | Missense Mutation | SLC8A3   | p.A215D  | solute carrier family 8   | (ε15 (0.00) | 51 (0.84)  | 2.25 |
| 11-14 | Gp3 | g.chr1:27426933G>T   | Silent            | SLC9A1   | p.S771S  | solute carrier family 9,  | s16 (0.00)  | 111 (0.44) | 1.18 |
| 11-14 | Gp3 | g.chr16:3632507G>T   | Missense Mutation | SLX4     | p.L1781M | SLX4 structure-specific   | 33 (0.00)   | 61 (0.69)  | 1.84 |
| 11-14 | Gp3 | g.chr15:67479802G>T  | Missense Mutation | SMAD3    | p.C326F  | SMAD family member        | 141 (0.01)  | 43 (0.33)  | 0.87 |
| 11-14 | Gp3 | g.chr19:11106910C>T  | Missense Mutation | SMARCA4  | p.R539C  | SWI/SNF related, matri:   | 43 (0.00)   | 223 (0.17) | 0.45 |
| 11-14 | Gp3 | g.chr16:88747567C>A  | Missense Mutation | SNAI3    | p.C211F  | snail family zinc finger  | 53 (0.00)   | 172 (0.42) | 1.13 |
| 11-14 | Gp3 | g.chr15:25455076G>A  | RNA               | SNHG14   |          | small nucleolar RNA ho    | 36 (0.00)   | 36 (0.39)  | 1.04 |
| 11-14 | Gp3 | g.chr11:64803092C>A  | Silent            | SNX15    | p.L207L  | sorting nexin 15          | 83 (0.00)   | 128 (0.25) | 0.67 |
| 11-14 | Gp3 | g.chr5:53814508C>A   | Silent            | SNX18    | p.A242A  | sorting nexin 18          | 26 (0.00)   | 41 (0.37)  | 0.98 |
| 11-14 | Gp3 | g.chr5:53814545G>A   | Missense Mutation | SNX18    | p.G255R  | sorting nexin 18          | 20 (0.00)   | 56 (0.71)  | 1.90 |
| 11-14 | Gp3 | g.chr18:8825449C>G   | Missense Mutation | SOGA2    | p.S1633C |                           | 29 (0.00)   | 258 (0.34) | 0.92 |
| 11-14 | Gp3 | g.chr18:8825502G>A   | Missense Mutation | SOGA2    | p.E1651K |                           | 31 (0.00)   | 361 (0.34) | 0.89 |
| 11-14 | Gp3 | g.chr21:34922577C>A  | Missense Mutation | SON      | p.P347Q  | SON DNA binding prot      | 19 (0.00)   | 70 (0.19)  | 0.50 |
| 11-14 | Gp3 | g.chr12:53722238A>T  | Missense Mutation | SP7      | p.F312I  | Sp7 transcription factor  | 40 (0.00)   | 170 (0.61) | 1.62 |
| 11-14 | Gp3 | g.chr12:53722299C>A  | Silent            | SP7      | p.S291S  | Sp7 transcription factor  | 40 (0.00)   | 156 (0.56) | 1.49 |
| 11-14 | Gp3 | g.chr2:214794748G>A  | Missense Mutation | SPAG16   | p.D427N  | sperm associated antige   | 196 (0.01)  | 69 (0.14)  | 0.39 |
| 11-14 | Gp3 | g.chr17:48625735A>T  | Missense Mutation | SPATA20  | p.T73S   | spermatogenesis associa   | 34 (0.00)   | 104 (0.26) | 0.69 |
| 11-14 | Gp3 | g.chr17:48625795G>T  | Missense Mutation | SPATA20  | p.A93S   | spermatogenesis associa   | 21 (0.00)   | 62 (0.32)  | 0.86 |

|       |     |                      |                   |          |          |                            |            |            |      |
|-------|-----|----------------------|-------------------|----------|----------|----------------------------|------------|------------|------|
| 11-14 | Gp3 | g.chr2:220354296G>T  | Silent            | SPEG     | p.L2852L | SPEG complex locus         | 36 (0.00)  | 103 (0.22) | 0.60 |
| 11-14 | Gp3 | g.chr17:7324847T>A   | Missense Mutation | SPEM1    | p.Y285N  | spermatid maturation 1     | 20 (0.00)  | 215 (0.46) | 1.23 |
| 11-14 | Gp3 | g.chr16:29675326A>G  | Missense Mutation | SPN      | p.T93A   | sialophorin                | 61 (0.00)  | 123 (0.23) | 0.61 |
| 11-14 | Gp3 | g.chr17:47712825A>G  | Intron            | SPOP     |          | speckle-type POZ protei    | 43 (0.00)  | 15 (0.33)  | 0.89 |
| 11-14 | Gp3 | g.chr14:65259982T>C  | Missense Mutation | SPTB     | p.E800G  | spectrin, beta, erythrocy  | 28 (0.00)  | 111 (0.23) | 0.60 |
| 11-14 | Gp3 | g.chr15:42175245G>A  | Missense Mutation | SPTBN5   | p.A614V  | spectrin, beta, non-eryth  | 37 (0.03)  | 332 (0.32) | 0.85 |
| 11-14 | Gp3 | g.chr19:18543795C>A  | Missense Mutation | SSBP4    | p.S263Y  | single stranded DNA bin    | 49 (0.00)  | 55 (0.24)  | 0.63 |
| 11-14 | Gp3 | g.chr18:44260131G>A  | Silent            | ST8SIA5  | p.H335H  | ST8 alpha-N-acetyl-neu     | 41 (0.02)  | 402 (0.30) | 0.80 |
| 11-14 | Gp3 | g.chr2:220478508G>C  | Missense Mutation | STK11IP  | p.A858P  | serine/threonine kinase    | 27 (0.00)  | 80 (0.30)  | 0.80 |
| 11-14 | Gp3 | g.chr7:73123419C>A   | Missense Mutation | STX1A    | p.V22F   | syntaxin 1A (brain)        | 162 (0.00) | 647 (0.15) | 0.41 |
| 11-14 | Gp3 | g.chr9:136234143C>T  | Missense Mutation | SURF4    | p.G76E   | surfeit 4                  | 30 (0.00)  | 222 (0.27) | 0.73 |
| 11-14 | Gp3 | g.chr14:64610628C>A  | Missense Mutation | SYNE2    | p.R5066S | spectrin repeat containi   | 124 (0.00) | 30 (0.97)  | 2.58 |
| 11-14 | Gp3 | g.chr6:158454629A>T  | Missense Mutation | SYNJ2    | p.S210C  | synaptojanin 2             | 19 (0.00)  | 29 (0.83)  | 2.21 |
| 11-14 | Gp3 | g.chr11:64897325C>A  | Missense Mutation | SYVN1    | p.A490S  | synovial apoptosis inhib   | 16 (0.00)  | 48 (0.19)  | 0.50 |
| 11-14 | Gp3 | g.chr1:43907705C>A   | Missense Mutation | SZT2     | p.P2536T | seizure threshold 2 hom    | 18 (0.00)  | 21 (0.29)  | 0.76 |
| 11-14 | Gp3 | g.chr10:123844261G>A | Missense Mutation | TACC2    | p.S749N  | transforming, acidic coil  | 15 (0.00)  | 12 (0.50)  | 1.33 |
| 11-14 | Gp3 | g.chr10:123845065C>A | Missense Mutation | TACC2    | p.A1017D | transforming, acidic coil  | 26 (0.00)  | 116 (0.70) | 1.86 |
| 11-14 | Gp3 | g.chr10:123845679C>G | Missense Mutation | TACC2    | p.L1222V | transforming, acidic coil  | 76 (0.00)  | 142 (0.62) | 1.65 |
| 11-14 | Gp3 | g.chr10:71174821C>T  | Nonsense Mutation | TACR2    | p.W156*  | tachykinin receptor 2      | 34 (0.00)  | 12 (0.67)  | 1.78 |
| 11-14 | Gp3 | g.chr1:229730573T>A  | Missense Mutation | TAF5L    | p.D414V  | TAF5-like RNA polymε       | 101 (0.00) | 291 (0.95) | 1.76 |
| 11-14 | Gp3 | g.chr1:229730574C>A  | Missense Mutation | TAF5L    | p.D414Y  | TAF5-like RNA polymε       | 102 (0.00) | 291 (0.95) | 1.76 |
| 11-14 | Gp3 | g.chr1:19180963C>A   | Missense Mutation | TAS1R2   | p.G334V  | taste receptor, type 1, m  | 20 (0.00)  | 127 (0.38) | 1.01 |
| 11-14 | Gp3 | g.chr17:60345589G>A  | RNA               | TBC1D3P2 |          | TBC1 domain family, n      | 99 (0.01)  | 179 (0.78) | 2.07 |
| 11-14 | Gp3 | g.chr10:114925728A>G | Silent            | TCF7L2   | p.E596E  | transcription factor 7-lik | 39 (0.00)  | 34 (0.56)  | 1.49 |
| 11-14 | Gp3 | g.chr6:167786687G>T  | Silent            | TCP10    | p.A317A  | t-complex 10               | 66 (0.00)  | 83 (0.52)  | 1.38 |
| 11-14 | Gp3 | g.chr9:100249515G>T  | Missense Mutation | TDRD7    | p.D993Y  | tudor domain containing    | 51 (0.00)  | 79 (0.75)  | 1.99 |
| 11-14 | Gp3 | g.chr7:97875291C>A   | Silent            | TECPR1   | p.V56V   | tectonin beta-propeller r  | 61 (0.00)  | 169 (0.15) | 0.51 |
| 11-14 | Gp3 | g.chr22:41791787G>A  | Silent            | TEF      | p.V245V  | thyrotrophic embryonic     | 44 (0.00)  | 83 (0.22)  | 0.58 |
| 11-14 | Gp3 | g.chr11:78369557A>G  | Missense Mutation | TENM4    | p.F2619S | teneurin transmembrane     | 89 (0.00)  | 58 (0.19)  | 0.51 |
| 11-14 | Gp3 | g.chr2:74328185G>A   | Missense Mutation | TET3     | p.E1289K | tet methylcytosine dioxy   | 53 (0.00)  | 69 (0.39)  | 1.04 |
| 11-14 | Gp3 | g.chr15:72039206G>T  | Missense Mutation | THSD4    | p.S689I  | thrombospondin, type I,    | 27 (0.00)  | 60 (0.93)  | 2.49 |
| 11-14 | Gp3 | g.chr6:155450838G>C  | Missense Mutation | TIAM2    | p.V161L  | T-cell lymphoma invasi     | 29 (0.00)  | 40 (0.60)  | 1.60 |
| 11-14 | Gp3 | g.chr19:4817971G>A   | Missense Mutation | TICAM1   | p.A140V  | toll-like receptor adapto  | 16 (0.00)  | 439 (0.25) | 0.67 |
| 11-14 | Gp3 | g.chr1:43772527C>T   | Silent            | TIE1     | p.T167T  | tyrosine kinase with imr   | 81 (0.00)  | 128 (0.20) | 0.52 |
| 11-14 | Gp3 | g.chr17:76170955G>T  | Missense Mutation | TK1      | p.P197H  | thymidine kinase 1, solu   | 19 (0.00)  | 138 (0.39) | 1.04 |



|       |     |                      |                   |          |           |                                    |            |            |      |
|-------|-----|----------------------|-------------------|----------|-----------|------------------------------------|------------|------------|------|
| 11-14 | Gp3 | g.chr10:98170118T>C  | Missense Mutation | TLL2     | p.K388E   | tolloid-like 2                     | 63 (0.00)  | 54 (0.15)  | 0.40 |
| 11-14 | Gp3 | g.chr13:114202632G>T | Silent            | TMCO3    | p.A595A   | transmembrane and coil 16          | 65 (0.00)  | 65 (0.42)  | 1.11 |
| 11-14 | Gp3 | g.chr17:21101797G>A  | Missense Mutation | TMEM11   | p.A140V   | transmembrane protein 130          | 23 (0.00)  | 23 (0.22)  | 0.58 |
| 11-14 | Gp3 | g.chr2:85826296G>C   | Missense Mutation | TMEM150A | p.A240G   | transmembrane protein 127          | 148 (0.00) | 148 (0.70) | 1.86 |
| 11-14 | Gp3 | g.chr10:104230721G>A | Nonsense Mutation | TMEM180  | p.W184*   | transmembrane protein 118          | 13 (0.00)  | 13 (0.85)  | 2.26 |
| 11-14 | Gp3 | g.chr18:5891883G>A   | Silent            | TMEM200C | p.I60I    | transmembrane protein 137          | 292 (0.00) | 292 (0.22) | 0.58 |
| 11-14 | Gp3 | g.chr6:44122610T>C   | Missense Mutation | TMEM63B  | p.I830T   | transmembrane protein 118          | 63 (0.00)  | 63 (0.35)  | 0.93 |
| 11-14 | Gp3 | g.chr11:18723449C>A  | Silent            | TMEM86A  | p.R206R   | transmembrane protein 165          | 123 (0.02) | 123 (0.21) | 0.56 |
| 11-14 | Gp3 | g.chr11:117774372C>G | Missense Mutation | TMPRSS13 | p.E559Q   | transmembrane protease 36          | 31 (0.00)  | 31 (0.77)  | 2.06 |
| 11-14 | Gp3 | g.chr2:218683452C>A  | Missense Mutation | TNS1     | p.E1084D  | tensin 1                           | 20 (0.00)  | 37 (0.76)  | 2.02 |
| 11-14 | Gp3 | g.chr8:145666417C>A  | Nonsense Mutation | TONSL    | p.E315*   | tonsoku-like, DNA repair           | 21 (0.00)  | 211 (0.22) | 0.59 |
| 11-14 | Gp3 | g.chr8:145668622G>T  | Missense Mutation | TONSL    | p.T116N   | tonsoku-like, DNA repair           | 29 (0.00)  | 182 (0.76) | 2.02 |
| 11-14 | Gp3 | g.chr1:179815429G>T  | Missense Mutation | TOR1AIP2 | p.T397N   | torsin A interacting protein 43    | 229 (0.02) | 229 (0.24) | 0.65 |
| 11-14 | Gp3 | g.chr6:83075440C>A   | Missense Mutation | TPBG     | p.F254L   | trophoblast glycoprotein 15        | 457 (0.00) | 457 (0.30) | 0.80 |
| 11-14 | Gp3 | g.chr7:65706194G>A   | Nonsense Mutation | TPST1    | p.W261*   | tyrosylprotein sulfotransferase 61 | 14 (0.00)  | 14 (0.79)  | 2.10 |
| 11-14 | Gp3 | g.chr6:42236377G>C   | Missense Mutation | TRERF1   | p.Q318E   | transcriptional regulator 75       | 195 (0.00) | 195 (0.32) | 0.85 |
| 11-14 | Gp3 | g.chr3:48508828G>T   | Missense Mutation | TREX1    | p.R258S   | three prime repair exonuclease 44  | 232 (0.00) | 232 (0.67) | 1.78 |
| 11-14 | Gp3 | g.chr2:12880545A>G   | Silent            | TRIB2    | p.V219V   | tribbles pseudokinase 2            | 52 (0.00)  | 71 (0.14)  | 0.38 |
| 11-14 | Gp3 | g.chr4:165961384C>G  | Missense Mutation | TRIM60   | p.P54A    | tripartite motif containing 52     | 34 (0.00)  | 34 (0.56)  | 1.49 |
| 11-14 | Gp3 | g.chr19:6750599C>T   | Missense Mutation | TRIP10   | p.P482S   | thyroid hormone receptor 70        | 366 (0.00) | 366 (0.25) | 0.68 |
| 11-14 | Gp3 | g.chr2:230654362G>A  | Missense Mutation | TRIP12   | p.H1209Y  | thyroid hormone receptor 17        | 181 (0.00) | 181 (0.33) | 0.87 |
| 11-14 | Gp3 | g.chr21:45838409C>A  | Silent            | TRPM2    | p.P1144P  | transient receptor potential 131   | 424 (0.00) | 424 (0.18) | 0.48 |
| 11-14 | Gp3 | g.chr9:77376684G>A   | Silent            | TRPM6    | p.V1571V  | transient receptor potential 21    | 87 (0.00)  | 87 (0.99)  | 2.64 |
| 11-14 | Gp3 | g.chr12:110226244G>T | Silent            | TRPV4    | p.G723G   | transient receptor potential 25    | 13 (0.00)  | 13 (0.38)  | 1.03 |
| 11-14 | Gp3 | g.chr18:73000363T>C  | Missense Mutation | TSHZ1    | p.S1001P  | teashirt zinc finger homeobox 70   | 120 (0.00) | 120 (0.57) | 1.83 |
| 11-14 | Gp3 | g.chr19:31770384T>A  | Silent            | TSHZ3    | p.P105P   | teashirt zinc finger homeobox 36   | 83 (0.00)  | 83 (0.23)  | 0.61 |
| 11-14 | Gp3 | g.chr11:44931445C>A  | Missense Mutation | TSPAN18  | p.L85I    | tetraspanin 18                     | 36 (0.03)  | 271 (0.18) | 0.49 |
| 11-14 | Gp3 | g.chr17:40093220G>T  | RNA               | TTC25    |           | tetratricopeptide repeat 162       | 242 (0.00) | 242 (0.78) | 2.07 |
| 11-14 | Gp3 | g.chr2:74717419G>A   | Missense Mutation | TTC31    | p.S94N    | tetratricopeptide repeat 131       | 46 (0.00)  | 46 (0.52)  | 1.39 |
| 11-14 | Gp3 | g.chr10:134752189C>G | Missense Mutation | TTC40    | p.G147A   |                                    | 38 (0.00)  | 229 (0.19) | 0.50 |
| 11-14 | Gp3 | g.chr17:46867418C>T  | Silent            | TTL6     | p.V425V   | tubulin tyrosine ligase-like 31    | 40 (0.00)  | 40 (0.97)  | 2.60 |
| 11-14 | Gp3 | g.chr2:179534328G>T  | Missense Mutation | TTN      | p.P11821T | titin                              | 95 (0.01)  | 218 (0.59) | 1.57 |
| 11-14 | Gp3 | g.chr2:130949455C>G  | Missense Mutation | TUBA3E   | p.E434D   | tubulin, alpha 3e                  | 90 (0.00)  | 61 (0.15)  | 0.39 |
| 11-14 | Gp3 | g.chr2:130949480G>T  | Missense Mutation | TUBA3E   | p.A426E   | tubulin, alpha 3e                  | 89 (0.00)  | 62 (0.39)  | 1.03 |
| 11-14 | Gp3 | g.chr19:6495778G>A   | Silent            | TUBB4A   | p.G244G   | tubulin, beta 4A class IV          | 29 (0.00)  | 188 (0.58) | 1.55 |

|       |     |                      |                   |         |          |                           |            |            |      |
|-------|-----|----------------------|-------------------|---------|----------|---------------------------|------------|------------|------|
| 11-14 | Gp3 | g.chr17:40766912C>A  | Silent            | TUBG1   | p.A403A  | tubulin, gamma 1          | 96 (0.00)  | 302 (0.19) | 0.50 |
| 11-14 | Gp3 | g.chr15:43690249G>T  | Missense Mutation | TUBGCP4 | p.Q430H  | tubulin, gamma comple     | 59 (0.00)  | 15 (0.87)  | 2.31 |
| 11-14 | Gp3 | g.chr6:158882749C>T  | Silent            | TULP4   | p.D338D  | tubby like protein 4      | 64 (0.00)  | 42 (0.43)  | 1.14 |
| 11-14 | Gp3 | g.chr7:72040532T>C   | RNA               | TYW1B   |          | tRNA-yW synthesizing      | 108 (0.00) | 15 (0.40)  | 1.07 |
| 11-14 | Gp3 | g.chr12:125398257C>A | Missense Mutation | UBC     | p.D21Y   | ubiquitin C               | 21 (0.00)  | 141 (0.95) | 2.53 |
| 11-14 | Gp3 | g.chr1:110655387G>A  | Missense Mutation | UBL4B   | p.M77I   | ubiquitin-like 4B         | 56 (0.00)  | 121 (0.55) | 1.48 |
| 11-14 | Gp3 | g.chr2:234622064G>A  | Missense Mutation | UGT1A5  | p.A143T  | UDP glucuronosyltransf    | 128 (0.01) | 161 (0.99) | 2.65 |
| 11-14 | Gp3 | g.chr4:70462031G>A   | Silent            | UGT2A1  | p.V311V  | UDP glucuronosyltransf    | 42 (0.00)  | 139 (0.26) | 0.69 |
| 11-14 | Gp3 | g.chr4:70160415T>C   | Missense Mutation | UGT2B28 | p.V493A  | UDP glucuronosyltransf    | 42 (0.00)  | 29 (0.21)  | 0.55 |
| 11-14 | Gp3 | g.chr19:4944297G>T   | RNA               | UHRF1   |          | ubiquitin-like with PHD   | 34 (0.00)  | 286 (0.25) | 0.67 |
| 11-14 | Gp3 | g.chr17:73831849G>A  | Missense Mutation | UNC13D  | p.R536W  | unc-13 homolog D (C. e    | 20 (0.00)  | 87 (0.17)  | 0.46 |
| 11-14 | Gp3 | g.chr11:17517140C>T  | Silent            | USH1C   | p.G877G  | Usher syndrome 1C (aut    | 130 (0.01) | 158 (0.21) | 0.56 |
| 11-14 | Gp3 | g.chr9:132631604C>A  | Missense Mutation | USP20   | p.A431D  | ubiquitin specific peptid | 34 (0.00)  | 180 (0.19) | 0.50 |
| 11-14 | Gp3 | g.chr11:77921513C>A  | Missense Mutation | USP35   | p.A871D  | ubiquitin specific peptid | 72 (0.00)  | 254 (0.64) | 1.70 |
| 11-14 | Gp3 | g.chr11:77921604T>A  | Silent            | USP35   | p.S901S  | ubiquitin specific peptid | 39 (0.00)  | 252 (1.00) | 2.66 |
| 11-14 | Gp3 | g.chr15:42462036A>G  | Silent            | VPS39   | p.P373P  | vacuolar protein sorting  | 31 (0.00)  | 115 (0.15) | 0.39 |
| 11-14 | Gp3 | g.chr11:64875144C>T  | Silent            | VPS51   | p.S150S  | vacuolar protein sorting  | 22 (0.00)  | 145 (0.23) | 0.61 |
| 11-14 | Gp3 | g.chr19:50498156A>T  | Missense Mutation | VRK3    | p.L262Q  | vaccinia related kinase   | 25 (0.00)  | 39 (0.56)  | 1.50 |
| 11-14 | Gp3 | g.chr1:1372331G>T    | Missense Mutation | VWA1    | p.G33V   | von Willebrand factor A   | 21 (0.00)  | 70 (0.63)  | 1.68 |
| 11-14 | Gp3 | g.chr11:61040746C>A  | Missense Mutation | VWCE    | p.A542S  | von Willebrand factor C   | 15 (0.00)  | 29 (0.83)  | 2.21 |
| 11-14 | Gp3 | g.chr2:114353133G>A  | RNA               | WASH2P  |          | WAS protein family hor    | 21 (0.00)  | 167 (0.40) | 1.05 |
| 11-14 | Gp3 | g.chr15:102506560G>A | RNA               | WASH3P  |          | WAS protein family hor    | 31 (0.00)  | 66 (0.17)  | 0.44 |
| 11-14 | Gp3 | g.chr7:73279708G>C   | Missense Mutation | WBSCR28 | p.C153S  | Williams-Beuren syndrc    | 20 (0.00)  | 123 (0.37) | 1.00 |
| 11-14 | Gp3 | g.chr7:151097233G>T  | Silent            | WDR86   | p.T86T   | WD repeat domain 86       | 48 (0.00)  | 47 (0.15)  | 0.52 |
| 11-14 | Gp3 | g.chr2:68384538A>G   | Missense Mutation | WDR92   | p.I13T   | WD repeat domain 92       | 29 (0.00)  | 123 (0.47) | 1.26 |
| 11-14 | Gp3 | g.chr3:39227565C>G   | Missense Mutation | XIRP1   | p.E1124D | xin actin-binding repeat  | 78 (0.00)  | 216 (0.24) | 0.63 |
| 11-14 | Gp3 | g.chr7:100365605C>A  | RNA               | ZAN     |          | zonadhesin (gene/pseud    | 62 (0.00)  | 56 (0.30)  | 1.00 |
| 11-14 | Gp3 | g.chr2:98354018G>T   | Missense Mutation | ZAP70   | p.V458L  | zeta-chain (TCR) associ   | 15 (0.00)  | 170 (0.15) | 0.39 |
| 11-14 | Gp3 | g.chr22:50278527G>T  | Missense Mutation | ZBED4   | p.G406V  | zinc finger, BED-type c   | 16 (0.00)  | 24 (0.21)  | 0.56 |
| 11-14 | Gp3 | g.chr3:114069176G>A  | Silent            | ZBTB20  | p.C510C  | zinc finger and BTB do    | 25 (0.00)  | 60 (0.28)  | 0.92 |
| 11-14 | Gp3 | g.chr17:7365468G>T   | Missense Mutation | ZBTB4   | p.P945T  | zinc finger and BTB do    | 79 (0.00)  | 105 (0.21) | 0.56 |
| 11-14 | Gp3 | g.chr18:45566465C>T  | Silent            | ZBTB7C  | p.L338L  | zinc finger and BTB do    | 30 (0.00)  | 51 (0.33)  | 0.89 |
| 11-14 | Gp3 | g.chr19:47593347T>C  | Missense Mutation | ZC3H4   | p.N198D  | zinc finger CCCH-type     | 52 (0.00)  | 66 (0.35)  | 0.93 |
| 11-14 | Gp3 | g.chr16:72828969C>A  | Missense Mutation | ZFHX3   | p.A2538S | zinc finger homeobox 3    | 74 (0.00)  | 36 (0.36)  | 0.96 |
| 11-14 | Gp3 | g.chr16:72991579G>A  | Silent            | ZFHX3   | p.H822H  | zinc finger homeobox 3    | 16 (0.00)  | 298 (0.40) | 1.07 |

|       |     |                      |                   |             |          |                            |            |            |      |
|-------|-----|----------------------|-------------------|-------------|----------|----------------------------|------------|------------|------|
| 11-14 | Gp3 | g.chr16:72991605T>A  | Missense Mutation | ZFHX3       | p.N814Y  | zinc finger homeobox 3     | 34 (0.00)  | 280 (0.38) | 1.02 |
| 11-14 | Gp3 | g.chr16:72991632G>A  | Missense Mutation | ZFHX3       | p.R805W  | zinc finger homeobox 3     | 35 (0.00)  | 140 (0.59) | 1.56 |
| 11-14 | Gp3 | g.chr16:72991692T>A  | Missense Mutation | ZFHX3       | p.N785Y  | zinc finger homeobox 3     | 21 (0.00)  | 225 (0.55) | 1.46 |
| 11-14 | Gp3 | g.chr8:106810974C>A  | Silent            | ZFPM2       | p.S254S  | zinc finger protein, FOC35 | 35 (0.00)  | 10 (0.50)  | 1.33 |
| 11-14 | Gp3 | g.chr5:32403302C>G   | Silent            | ZFR         | p.S475S  | zinc finger RNA binding    | 39 (0.00)  | 35 (0.77)  | 2.06 |
| 11-14 | Gp3 | g.chr3:15115794G>A   | Missense Mutation | ZFYVE20     | p.P617L  | zinc finger, FYVE domain   | 66 (0.00)  | 26 (0.50)  | 1.33 |
| 11-14 | Gp3 | g.chr3:147131175C>T  | Missense Mutation | ZIC1        | p.S394L  | Zic family member 1        | 19 (0.00)  | 31 (0.81)  | 2.61 |
| 11-14 | Gp3 | g.chr6:28120834G>T   | Splice Site       | ZKSCAN8     | p.G259V  | zinc finger with KRAB      | 84 (0.00)  | 95 (0.19)  | 0.51 |
| 11-14 | Gp3 | g.chr17:4644909C>G   | Missense Mutation | ZMYND15     | p.L209V  | zinc finger, MYND-type     | 195 (0.00) | 178 (0.17) | 0.46 |
| 11-14 | Gp3 | g.chr11:46726766C>A  | Missense Mutation | ZNF408      | p.R506S  | zinc finger protein 408    | 19 (0.00)  | 59 (0.17)  | 0.45 |
| 11-14 | Gp3 | g.chr16:30408724C>T  | Silent            | ZNF48       | p.F51F   | zinc finger protein 48     | 21 (0.00)  | 23 (0.22)  | 0.58 |
| 11-14 | Gp3 | g.chr19:12721456T>C  | Silent            | ZNF490      | p.R13R   | zinc finger protein 490    | 36 (0.00)  | 42 (0.93)  | 2.48 |
| 11-14 | Gp3 | g.chr10:97919348C>T  | RNA               | ZNF518A     |          | zinc finger protein 518A   | 122 (0.01) | 164 (0.98) | 2.62 |
| 11-14 | Gp3 | g.chr19:48032264C>G  | Missense Mutation | ZNF541      | p.R1171S | zinc finger protein 541    | 46 (0.00)  | 16 (0.88)  | 2.33 |
| 11-14 | Gp3 | g.chr16:30793437C>T  | Missense Mutation | ZNF629      | p.G738S  | zinc finger protein 629    | 27 (0.00)  | 152 (0.86) | 2.28 |
| 11-14 | Gp3 | g.chr8:81599579G>T   | Missense Mutation | ZNF704      | p.P147Q  | zinc finger protein 704    | 19 (0.00)  | 65 (0.91)  | 2.42 |
| 11-14 | Gp3 | g.chr7:88965055G>T   | Missense Mutation | ZNF804B     | p.R920M  | zinc finger protein 804B   | 36 (0.00)  | 113 (0.22) | 0.73 |
| 11-14 | Gp3 | g.chr7:149559178G>T  | Nonsense Mutation | ZNF862      | p.E977*  | zinc finger protein 862    | 129 (0.01) | 549 (0.23) | 0.81 |
| 11-14 | Gp3 | g.chr19:20229245T>C  | Silent            | ZNF90       | p.F294F  | zinc finger protein 90     | 53 (0.00)  | 14 (0.43)  | 1.14 |
| 11-14 | Gp3 | g.chr22:29446151G>T  | Missense Mutation | ZNRF3       | p.C661F  | zinc and ring finger 3     | 26 (0.00)  | 263 (0.22) | 0.59 |
| 11-14 | Gp3 | g.chr19:58600203C>A  | Splice Site       | ZSCAN18     | p.G191G  | zinc finger and SCAN d     | 56 (0.00)  | 325 (0.15) | 0.40 |
| 11-14 | Gp3 | g.chr19:58189817C>A  | Silent            | ZSCAN4      | p.S282S  | zinc finger and SCAN d     | 22 (0.00)  | 82 (0.41)  | 1.11 |
| 11-14 | Gp3 | g.chr20:44507176A>G  | Missense Mutation | ZSWIM3      | p.E660G  | zinc finger, SWIM-type     | 124 (0.00) | 78 (0.28)  | 0.75 |
| 11-14 | Gp4 | g.chr16:2331218T>C   | Missense Mutation | ABCA3       | p.Y1332C | ATP-binding cassette, s1   | 24 (0.00)  | 182 (0.23) | 0.60 |
| 11-14 | Gp4 | g.chr19:1046407T>A   | Splice Site       | ABCA7       |          | ATP-binding cassette, s1   | 23 (0.00)  | 143 (0.79) | 2.11 |
| 11-14 | Gp4 | g.chr16:48173146C>G  | Silent            | ABCC12      | p.A253A  | ATP-binding cassette, s1   | 88 (0.01)  | 183 (0.96) | 2.56 |
| 11-14 | Gp4 | g.chr11:119031091T>A | Missense Mutation | ABCG4       | p.L531Q  | ATP-binding cassette, s1   | 61 (0.00)  | 51 (0.61)  | 1.62 |
| 11-14 | Gp4 | g.chr3:52021179C>T   | Missense Mutation | ABHD14A-AC  | p.S326F  | ABHD14A-ACY1 readt         | 65 (0.00)  | 316 (0.17) | 0.46 |
| 11-14 | Gp4 | g.chr15:31093522C>A  | RNA               | AC004460.1  |          |                            | 89 (0.00)  | 232 (0.16) | 0.53 |
| 11-14 | Gp4 | g.chr15:31093555G>A  | RNA               | AC004460.1  |          |                            | 74 (0.00)  | 292 (0.54) | 1.73 |
| 11-14 | Gp4 | g.chr2:71256770T>G   | RNA               | AC007040.8  |          |                            | 62 (0.00)  | 214 (1.00) | 2.65 |
| 11-14 | Gp4 | g.chr22:18835246G>A  | Missense Mutation | AC008132.13 | p.A268T  |                            | 44 (0.00)  | 150 (0.15) | 0.39 |
| 11-14 | Gp4 | g.chr3:194476996A>G  | lincRNA           | AC090505.6  |          |                            | 19 (0.00)  | 29 (0.28)  | 0.88 |
| 11-14 | Gp4 | g.chr3:194477034C>T  | lincRNA           | AC090505.6  |          |                            | 19 (0.00)  | 26 (0.73)  | 2.32 |
| 11-14 | Gp4 | g.chr2:132257830C>T  | RNA               | AC093838.4  |          |                            | 27 (0.00)  | 18 (0.28)  | 0.74 |

|       |     |                      |                   |            |         |                                     |            |      |
|-------|-----|----------------------|-------------------|------------|---------|-------------------------------------|------------|------|
| 11-14 | Gp4 | g.chr2:135621131C>G  | Missense Mutation | ACMSD      | p.P139R | aminocarboxymuconate 15 (0.00)      | 98 (0.76)  | 2.01 |
| 11-14 | Gp4 | g.chr22:41923963C>T  | Silent            | ACO2       | p.Y740Y | aconitase 2, mitochondr 36 (0.00)   | 150 (0.55) | 1.48 |
| 11-14 | Gp4 | g.chr7:5568812T>C    | Missense Mutation | ACTB       | p.N115D | actin, beta 45 (0.00)               | 105 (0.31) | 1.12 |
| 11-14 | Gp4 | g.chr3:169487303G>A  | Silent            | ACTRT3     | p.N2N   | actin-related protein T3 26 (0.00)  | 144 (0.31) | 0.97 |
| 11-14 | Gp4 | g.chr9:136310911C>A  | Missense Mutation | ADAMTS13   | p.A901E | ADAM metallopeptidas 18 (0.00)      | 38 (0.39)  | 1.05 |
| 11-14 | Gp4 | g.chr11:130339212G>T | Missense Mutation | ADAMTS15   | p.G533V | ADAM metallopeptidas 67 (0.00)      | 139 (0.34) | 0.90 |
| 11-14 | Gp4 | g.chr5:178700022G>T  | Missense Mutation | ADAMTS2    | p.P193H | ADAM metallopeptidas 38 (0.00)      | 47 (0.77)  | 2.04 |
| 11-14 | Gp4 | g.chr1:161163434G>T  | Silent            | ADAMTS4    | p.G577G | ADAM metallopeptidas 72 (0.00)      | 265 (0.18) | 0.48 |
| 11-14 | Gp4 | g.chr15:84582020A>G  | Missense Mutation | ADAMTSL3   | p.D626G | ADAMTS-like 3 22 (0.00)             | 69 (0.16)  | 0.43 |
| 11-14 | Gp4 | g.chr3:123071390G>A  | Silent            | ADCY5      | p.I24I  | adenylate cyclase 5 86 (0.00)       | 188 (0.65) | 2.06 |
| 11-14 | Gp4 | g.chr22:24836703G>C  | Missense Mutation | ADORA2A    | p.G162A | adenosine A2a receptor 32 (0.00)    | 49 (0.57)  | 1.52 |
| 11-14 | Gp4 | g.chr7:150839253C>A  | Silent            | AGAP3      | p.R324R | ArfGAP with GTPase d 24 (0.00)      | 49 (0.65)  | 2.08 |
| 11-14 | Gp4 | g.chr10:51769855G>T  | Missense Mutation | AGAP6      | p.G657V | ArfGAP with GTPase d 179 (0.01)     | 162 (0.26) | 0.69 |
| 11-14 | Gp4 | g.chr5:76326747C>T   | Silent            | AGGF1      | p.H52H  | angiogenic factor with C 42 (0.02)  | 334 (0.56) | 1.49 |
| 11-14 | Gp4 | g.chr21:45389054C>T  | Missense Mutation | AGPAT3     | p.T135M | 1-acylglycerol-3-phosph 15 (0.00)   | 34 (0.88)  | 3.12 |
| 11-14 | Gp4 | g.chr1:4771960C>T    | Splice Site       | AJAP1      | p.S10S  | adherens junctions assoc 36 (0.00)  | 126 (0.99) | 2.14 |
| 11-14 | Gp4 | g.chr1:19593757G>T   | RNA               | AKR7L      |         | aldo-keto reductase fam 16 (0.00)   | 61 (0.61)  | 1.62 |
| 11-14 | Gp4 | g.chr1:19200995A>G   | Missense Mutation | ALDH4A1    | p.I514T | aldehyde dehydrogenase 38 (0.00)    | 17 (0.35)  | 0.94 |
| 11-14 | Gp4 | g.chr17:6797983C>T   | RNA               | ALOX12P2   |         | arachidonate 12-lipoxyg 29 (0.00)   | 34 (0.24)  | 0.63 |
| 11-14 | Gp4 | g.chr2:233243918G>C  | Missense Mutation | ALPP       | p.V68L  | alkaline phosphatase, pl: 24 (0.00) | 32 (0.28)  | 0.75 |
| 11-14 | Gp4 | g.chr2:233272475G>A  | Missense Mutation | ALPPL2     | p.A158T | alkaline phosphatase, pl: 31 (0.00) | 75 (0.16)  | 0.43 |
| 11-14 | Gp4 | g.chr1:110604076C>T  | Missense Mutation | ALX3       | p.R235H | ALX homeobox 3 27 (0.00)            | 128 (0.74) | 1.98 |
| 11-14 | Gp4 | g.chr11:46564528C>A  | Nonsense Mutation | AMBRA1     | p.E257* | autophagy/beclin-1 regu 51 (0.00)   | 207 (0.83) | 2.22 |
| 11-14 | Gp4 | g.chr3:134086348G>T  | Silent            | AMOTL2     | p.R402R | angiomin like 2 45 (0.00)           | 178 (0.14) | 0.45 |
| 11-14 | Gp4 | g.chr17:79852380C>G  | Missense Mutation | ANAPC11    | p.N9K   | anaphase promoting con 46 (0.00)    | 113 (0.22) | 0.59 |
| 11-14 | Gp4 | g.chr10:99341123G>A  | Silent            | ANKRD2     | p.V202V | ankyrin repeat domain 248 (0.00)    | 53 (0.64)  | 1.71 |
| 11-14 | Gp4 | g.chr1:145562053G>A  | Missense Mutation | ANKRD35    | p.D581N | ankyrin repeat domain 3 15 (0.00)   | 11 (0.82)  | 2.18 |
| 11-14 | Gp4 | g.chr4:186318457G>T  | Splice Site       | ANKRD37    |         | ankyrin repeat domain 3 28 (0.00)   | 37 (0.27)  | 0.72 |
| 11-14 | Gp4 | g.chr12:56641976C>A  | Silent            | ANKRD52    | p.T603T | ankyrin repeat domain 540 (0.00)    | 120 (0.99) | 2.64 |
| 11-14 | Gp4 | g.chr11:418503C>T    | Silent            | ANO9       | p.K739K | anoctamin 9 21 (0.00)               | 136 (0.42) | 1.12 |
| 11-14 | Gp4 | g.chr15:90349224C>T  | Silent            | ANPEP      | p.E197E | alanyl (membrane) amir 40 (0.00)    | 136 (0.15) | 0.39 |
| 11-14 | Gp4 | g.chr7:150555924C>T  | Silent            | AOC1       | p.R548R | amine oxidase, copper c 51 (0.00)   | 150 (0.12) | 0.38 |
| 11-14 | Gp4 | g.chr21:24473998C>T  | lincRNA           | AP001255.2 |         | 54 (0.02)                           | 30 (0.80)  | 2.13 |
| 11-14 | Gp4 | g.chr21:11181137T>A  | lincRNA           | AP003900.6 |         | 186 (0.00)                          | 97 (0.61)  | 1.62 |
| 11-14 | Gp4 | g.chr11:985438C>T    | Missense Mutation | AP2A2      | p.P273L | adaptor-related protein c 77 (0.00) | 114 (0.71) | 1.89 |

|       |     |                      |                   |          |          |                           |            |            |      |
|-------|-----|----------------------|-------------------|----------|----------|---------------------------|------------|------------|------|
| 11-14 | Gp4 | g.chr11:116691586G>T | Missense Mutation | APOA4    | p.S396R  | apolipoprotein A-IV       | 44 (0.00)  | 87 (0.75)  | 1.99 |
| 11-14 | Gp4 | g.chr22:36661479C>A  | Missense Mutation | APOL1    | p.F199L  | apolipoprotein L, 1       | 152 (0.00) | 51 (0.98)  | 2.61 |
| 11-14 | Gp4 | g.chr7:30951878C>A   | Silent            | AQP1     | p.S118S  | aquaporin 1 (Colton blo   | 97 (0.00)  | 255 (0.19) | 0.64 |
| 11-14 | Gp4 | g.chr11:118468551C>T | Silent            | ARCN1    | p.S498S  | archain 1                 | 49 (0.00)  | 142 (0.20) | 0.54 |
| 11-14 | Gp4 | g.chr19:47503694G>T  | Missense Mutation | ARHGAP35 | p.A1417S | Rho GTPase activating j   | 67 (0.00)  | 227 (0.38) | 1.02 |
| 11-14 | Gp4 | g.chr8:145770707G>A  | Missense Mutation | ARHGAP39 | p.P816L  | Rho GTPase activating j   | 30 (0.00)  | 42 (0.24)  | 0.63 |
| 11-14 | Gp4 | g.chr1:156946820G>T  | Silent            | ARHGEF11 | p.T179T  | Rho guanine nucleotide    | 84 (0.00)  | 178 (0.21) | 0.57 |
| 11-14 | Gp4 | g.chr11:73076992G>T  | Splice Site       | ARHGEF17 | p.G1999C | Rho guanine nucleotide    | 39 (0.00)  | 59 (0.73)  | 1.94 |
| 11-14 | Gp4 | g.chr2:131673497C>T  | Missense Mutation | ARHGEF4  | p.P330S  | Rho guanine nucleotide    | 15 (0.00)  | 42 (0.43)  | 1.14 |
| 11-14 | Gp4 | g.chr14:21542403G>T  | Missense Mutation | ARHGEF40 | p.G172W  | Rho guanine nucleotide    | 24 (0.00)  | 140 (0.22) | 0.59 |
| 11-14 | Gp4 | g.chr5:149677547G>A  | Missense Mutation | ARSI     | p.R314C  | arylsulfatase family, me  | 16 (0.00)  | 115 (0.23) | 0.63 |
| 11-14 | Gp4 | g.chr2:220396550G>A  | Missense Mutation | ASIC4    | p.G345E  | acid-sensing (proton-gat  | 46 (0.00)  | 20 (0.40)  | 1.07 |
| 11-14 | Gp4 | g.chr17:79954579T>A  | Missense Mutation | ASPSCR1  | p.S264T  | alveolar soft part sarcon | 23 (0.00)  | 104 (0.14) | 0.38 |
| 11-14 | Gp4 | g.chr2:242606154G>C  | Missense Mutation | ATG4B    | p.E211D  | autophagy related 4B, c   | 46 (0.00)  | 152 (0.49) | 1.30 |
| 11-14 | Gp4 | g.chr12:7045832G>A   | Missense Mutation | ATN1     | p.A468T  | atrophin 1                | 22 (0.00)  | 48 (0.44)  | 1.17 |
| 11-14 | Gp4 | g.chr15:25962002C>A  | Missense Mutation | ATP10A   | p.A551S  | ATPase, class V, type 10  | 71 (0.00)  | 84 (0.29)  | 0.92 |
| 11-14 | Gp4 | g.chr5:159992823T>C  | Silent            | ATP10B   | p.K1341K | ATPase, class V, type 10  | 104 (0.00) | 49 (0.35)  | 0.93 |
| 11-14 | Gp4 | g.chr19:36054115G>A  | Missense Mutation | ATP4A    | p.T71I   | ATPase, H+/K+ exchan      | 44 (0.00)  | 302 (0.17) | 0.46 |
| 11-14 | Gp4 | g.chr19:1807188G>T   | Silent            | ATP8B3   | p.T198T  | ATPase, aminophospho      | 30 (0.00)  | 98 (0.40)  | 1.06 |
| 11-14 | Gp4 | g.chr7:70228071C>T   | Missense Mutation | AUTS2    | p.P320S  | autism susceptibility car | 35 (0.00)  | 199 (0.76) | 2.02 |
| 11-14 | Gp4 | g.chr19:17922801C>A  | Missense Mutation | B3GNT3   | p.S330Y  | UDP-GlcNAc:betaGal t      | 43 (0.00)  | 176 (0.45) | 1.21 |
| 11-14 | Gp4 | g.chr6:90660415G>A   | Silent            | BACH2    | p.A470A  | BTB and CNC homolog       | 46 (0.00)  | 230 (0.17) | 0.46 |
| 11-14 | Gp4 | g.chr11:64051784C>A  | Missense Mutation | BAD      | p.E19D   | BCL2-associated agonis    | 22 (0.00)  | 180 (0.28) | 0.74 |
| 11-14 | Gp4 | g.chr17:79077781G>T  | Missense Mutation | BAIAP2   | p.W176C  | BAI1-associated protein   | 26 (0.00)  | 176 (0.22) | 0.59 |
| 11-14 | Gp4 | g.chr17:6927617A>G   | Missense Mutation | BCL6B    | p.Q132R  | B-cell CLL/lymphoma t     | 23 (0.00)  | 49 (0.57)  | 1.52 |
| 11-14 | Gp4 | g.chr3:5024868G>A    | Missense Mutation | BHLHE40  | p.G244S  | basic helix-loop-helix fa | 38 (0.00)  | 18 (0.44)  | 1.19 |
| 11-14 | Gp4 | g.chr9:95480821C>A   | Splice Site       | BICD2    | p.Q702H  | bicaudal D homolog 2 (l   | 20 (0.00)  | 24 (0.25)  | 0.67 |
| 11-14 | Gp4 | g.chr2:32743448T>C   | Missense Mutation | BIRC6    | p.L3826P | baculoviral IAP repeat    | 48 (0.00)  | 19 (0.26)  | 0.70 |
| 11-14 | Gp4 | g.chr16:2259695A>G   | Missense Mutation | BRICD5   | p.W151R  | BRICHOS domain cont       | 25 (0.00)  | 56 (0.16)  | 0.43 |
| 11-14 | Gp4 | g.chr3:49701895C>A   | Missense Mutation | BSN      | p.A3883D | bassoon presynaptic cyt   | 71 (0.00)  | 233 (0.36) | 0.96 |
| 11-14 | Gp4 | g.chr20:11899001C>T  | Silent            | BTBD3    | p.S26S   | BTB (POZ) domain con      | 152 (0.00) | 49 (0.96)  | 2.56 |
| 11-14 | Gp4 | g.chr17:56400662C>G  | Missense Mutation | BZRAP1   | p.E307D  | benzodiazepine receptor   | 94 (0.00)  | 558 (0.20) | 0.53 |
| 11-14 | Gp4 | g.chr11:65685238C>T  | Missense Mutation | C11orf68 | p.V192M  | chromosome 11 open re     | 25 (0.00)  | 158 (0.50) | 1.33 |
| 11-14 | Gp4 | g.chr11:63586075C>T  | Silent            | C11orf84 | p.V228V  | chromosome 11 open re     | 27 (0.00)  | 248 (0.67) | 1.80 |
| 11-14 | Gp4 | g.chr15:74032975G>C  | Missense Mutation | C15orf59 | p.S55R   | chromosome 15 open re     | 19 (0.00)  | 34 (0.15)  | 0.39 |

|       |     |                      |                   |          |          |                           |               |            |      |
|-------|-----|----------------------|-------------------|----------|----------|---------------------------|---------------|------------|------|
| 11-14 | Gp4 | g.chr17:79517420C>A  | Missense Mutation | C17orf70 | p.C367F  | chromosome 17 open re     | 47 (0.02)     | 235 (0.68) | 1.80 |
| 11-14 | Gp4 | g.chr1:162344195G>A  | Silent            | C1orf111 | p.S143S  | chromosome 1 open rea     | 94 (0.01)     | 239 (0.14) | 0.38 |
| 11-14 | Gp4 | g.chr5:159776360C>T  | Missense Mutation | C1QTNF2  | p.A270T  | C1q and tumor necrosis    | 74 (0.00)     | 106 (0.52) | 1.38 |
| 11-14 | Gp4 | g.chr2:26798893A>T   | Missense Mutation | C2orf70  | p.Q66H   | chromosome 2 open rea     | 152 (0.00)    | 298 (0.65) | 1.74 |
| 11-14 | Gp4 | g.chr4:81504320C>A   | Missense Mutation | C4orf22  | p.R106S  | chromosome 4 open rea     | 40 (0.00)     | 27 (0.26)  | 0.69 |
| 11-14 | Gp4 | g.chr9:34381396G>A   | Missense Mutation | C9orf24  | p.P148L  | chromosome 9 open rea     | 88 (0.00)     | 338 (0.30) | 0.80 |
| 11-14 | Gp4 | g.chr3:50416890A>G   | Silent            | CACNA2D2 | p.F375F  | calcium channel, voltag   | 25 (0.00)     | 34 (0.35)  | 0.94 |
| 11-14 | Gp4 | g.chr3:50416907C>A   | Missense Mutation | CACNA2D2 | p.G370C  | calcium channel, voltag   | 19 (0.00)     | 33 (0.15)  | 0.40 |
| 11-14 | Gp4 | g.chr3:85225280C>T   | Intron            | CADM2    |          | cell adhesion molecule    | 284 (0.00)    | 204 (0.57) | 1.53 |
| 11-14 | Gp4 | g.chr3:85576420C>T   | Intron            | CADM2    |          | cell adhesion molecule    | 269 (0.00)    | 64 (0.89)  | 2.38 |
| 11-14 | Gp4 | g.chr3:85770822C>A   | Intron            | CADM2    |          | cell adhesion molecule    | 219 (0.00)    | 102 (0.44) | 1.18 |
| 11-14 | Gp4 | g.chr12:54109733A>G  | Silent            | CALCOCO1 | p.S368S  | calcium binding and coi   | 40 (0.03)     | 194 (0.31) | 0.84 |
| 11-14 | Gp4 | g.chr22:37903850T>C  | Missense Mutation | CARD10   | p.K393E  | caspase recruitment don   | 89 (0.00)     | 76 (0.83)  | 2.21 |
| 11-14 | Gp4 | g.chr13:111290588G>T | Splice Site       | CARKD    |          | carbohydrate kinase don   | 43 (0.00)     | 50 (0.44)  | 1.17 |
| 11-14 | Gp4 | g.chr2:219895448G>A  | Missense Mutation | CCDC108  | p.T375I  | coiled-coil domain cont   | 17 (0.00)     | 58 (0.26)  | 0.69 |
| 11-14 | Gp4 | g.chr2:219896289C>A  | Missense Mutation | CCDC108  | p.C246F  | coiled-coil domain cont   | 91 (0.00)     | 161 (0.36) | 0.96 |
| 11-14 | Gp4 | g.chr19:48801483T>A  | Missense Mutation | CCDC114  | p.E415V  | coiled-coil domain cont   | 19 (0.00)     | 72 (0.42)  | 1.11 |
| 11-14 | Gp4 | g.chr19:48801484C>A  | Nonsense Mutation | CCDC114  | p.E415*  | coiled-coil domain cont   | 19 (0.00)     | 71 (0.42)  | 1.13 |
| 11-14 | Gp4 | g.chr19:49920712C>A  | Missense Mutation | CCDC155  | p.P545Q  | coiled-coil domain cont   | 28 (0.00)     | 71 (0.28)  | 0.75 |
| 11-14 | Gp4 | g.chr10:12940549G>C  | Missense Mutation | CCDC3    | p.S227C  | coiled-coil domain cont   | 35 (0.00)     | 78 (0.18)  | 0.48 |
| 11-14 | Gp4 | g.chr3:126153074C>A  | Missense Mutation | CCDC37   | p.T493N  | coiled-coil domain cont   | 22 (0.00)     | 28 (0.18)  | 0.57 |
| 11-14 | Gp4 | g.chr17:80159569C>A  | Missense Mutation | CCDC57   | p.W84C   | coiled-coil domain cont   | 31 (0.00)     | 234 (0.20) | 0.52 |
| 11-14 | Gp4 | g.chr14:91779699T>C  | Missense Mutation | CCDC88C  | p.K821E  | coiled-coil domain cont   | 19 (0.00)     | 30 (0.70)  | 1.87 |
| 11-14 | Gp4 | g.chr11:6292368G>T   | Silent            | CCKBR    | p.G313G  | cholecystokinin B recep   | 23 (0.00)     | 188 (0.18) | 0.48 |
| 11-14 | Gp4 | g.chr10:12291689C>A  | Missense Mutation | CDC123   | p.A319D  | cell division cycle       | 123 76 (0.00) | 135 (0.59) | 1.58 |
| 11-14 | Gp4 | g.chr10:73501588C>T  | Silent            | CDH23    | p.I1590I | cadherin-related          | 23 23 (0.00)  | 114 (0.17) | 0.44 |
| 11-14 | Gp4 | g.chr10:73558878T>C  | Silent            | CDH23    | p.I2360I | cadherin-related          | 23 36 (0.00)  | 37 (0.81)  | 2.16 |
| 11-14 | Gp4 | g.chr5:176002195G>T  | Silent            | CDHR2    | p.L202L  | cadherin-related family   | 21 (0.00)     | 271 (0.21) | 0.56 |
| 11-14 | Gp4 | g.chr1:1636355A>G    | Silent            | CDK11A   | p.I472I  | cyclin-dependent kinase   | 51 (0.00)     | 49 (0.98)  | 2.61 |
| 11-14 | Gp4 | g.chr17:73000103C>T  | Silent            | CDR2L    | p.F444F  | cerebellar degeneration-  | 23 (0.00)     | 109 (0.64) | 1.71 |
| 11-14 | Gp4 | g.chr22:46930196G>T  | Silent            | CELSR1   | p.R958R  | cadherin, EGF LAG sev     | 59 (0.00)     | 67 (0.34)  | 0.92 |
| 11-14 | Gp4 | g.chr4:68374577C>T   | Missense Mutation | CENPC    | p.S620N  | centromere protein C      | 175 (0.00)    | 329 (0.14) | 0.38 |
| 11-14 | Gp4 | g.chr2:65296657A>G   | Missense Mutation | CEP68    | p.R27G   | centrosomal protein       | 68k 20 (0.00) | 19 (0.79)  | 2.11 |
| 11-14 | Gp4 | g.chr9:131186789T>C  | Missense Mutation | CERCAM   | p.L221P  | cerebral endothelial cell | 48 (0.00)     | 154 (0.23) | 0.62 |
| 11-14 | Gp4 | g.chr1:151501929C>T  | Missense Mutation | CGN      | p.A667V  | cingulin                  | 23 (0.00)     | 32 (0.84)  | 2.25 |

|       |     |                      |                   |              |          |                                    |            |      |
|-------|-----|----------------------|-------------------|--------------|----------|------------------------------------|------------|------|
| 11-14 | Gp4 | g.chr1:6180986G>A    | Intron            | CHD5         |          | chromodomain helicase 53 (0.00)    | 175 (0.85) | 1.83 |
| 11-14 | Gp4 | g.chr1:6191065G>T    | Intron            | CHD5         |          | chromodomain helicase 39 (0.00)    | 32 (0.28)  | 0.61 |
| 11-14 | Gp4 | g.chr1:6196517G>A    | Intron            | CHD5         |          | chromodomain helicase 36 (0.00)    | 146 (0.19) | 0.41 |
| 11-14 | Gp4 | g.chr1:6196522C>G    | Intron            | CHD5         |          | chromodomain helicase 36 (0.00)    | 148 (0.51) | 1.09 |
| 11-14 | Gp4 | g.chr1:6197092A>G    | Intron            | CHD5         |          | chromodomain helicase 64 (0.00)    | 167 (0.19) | 0.41 |
| 11-14 | Gp4 | g.chr1:6197107G>A    | Intron            | CHD5         |          | chromodomain helicase 61 (0.00)    | 130 (0.28) | 0.61 |
| 11-14 | Gp4 | g.chr1:6222543G>T    | Intron            | CHD5         |          | chromodomain helicase 56 (0.00)    | 88 (0.41)  | 0.88 |
| 11-14 | Gp4 | g.chr1:6226942G>A    | Intron            | CHD5         |          | chromodomain helicase 79 (0.00)    | 169 (0.40) | 0.87 |
| 11-14 | Gp4 | g.chr11:46407132G>A  | Missense Mutation | CHRM4        | p.P326S  | cholinergic receptor, mu27 (0.00)  | 130 (0.32) | 0.86 |
| 11-14 | Gp4 | g.chr2:233409177C>G  | Missense Mutation | CHRNA3       | p.S379W  | cholinergic receptor, nic19 (0.00) | 87 (0.31)  | 0.83 |
| 11-14 | Gp4 | g.chr19:42791859T>G  | Missense Mutation | CIC          | p.Y1158D | capicua transcriptional r44 (0.02) | 359 (0.43) | 1.15 |
| 11-14 | Gp4 | g.chr19:19650507G>T  | Missense Mutation | CILP2        | p.E28D   | cartilage intermediate la24 (0.00) | 10 (0.60)  | 1.60 |
| 11-14 | Gp4 | g.chr12:120151416G>C | Missense Mutation | CIT          | p.C1448W | citron rho-interacting se22 (0.00) | 91 (0.45)  | 1.20 |
| 11-14 | Gp4 | g.chr9:130941477C>T  | Missense Mutation | CIZ1         | p.V337M  | CDKN1A interacting zi22 (0.00)     | 140 (0.18) | 0.48 |
| 11-14 | Gp4 | g.chr7:73814765G>T   | Missense Mutation | CLIP2        | p.E982D  | CAP-GLY domain cont:44 (0.00)      | 197 (0.24) | 0.65 |
| 11-14 | Gp4 | g.chr4:10515192G>A   | Missense Mutation | CLNK         | p.P268S  | cytokine-dependent herr35 (0.00)   | 53 (0.60)  | 1.61 |
| 11-14 | Gp4 | g.chr4:56314984G>T   | Missense Mutation | CLOCK        | p.Q501K  | clock circadian regulato36 (0.00)  | 22 (0.82)  | 2.18 |
| 11-14 | Gp4 | g.chr12:7303530G>C   | Missense Mutation | CLSTN3       | p.V800L  | calsyntenin 3 26 (0.00)            | 132 (0.36) | 0.95 |
| 11-14 | Gp4 | g.chr2:97464811C>T   | Missense Mutation | CNNM4        | p.P567S  | cyclin and CBS domain 25 (0.00)    | 34 (0.24)  | 0.63 |
| 11-14 | Gp4 | g.chr2:97464841C>A   | Silent            | CNNM4        | p.R577R  | cyclin and CBS domain 23 (0.00)    | 32 (0.25)  | 0.67 |
| 11-14 | Gp4 | g.chr7:135099146C>A  | Silent            | CNOT4        | p.R165R  | CCR4-NOT transcriptio41 (0.00)     | 72 (0.42)  | 1.32 |
| 11-14 | Gp4 | g.chr1:205035623T>C  | Missense Mutation | CNTN2        | p.I624T  | contactin 2 (axonal) 57 (0.00)     | 24 (0.21)  | 0.56 |
| 11-14 | Gp4 | g.chr9:39175994C>T   | Silent            | CNTNAP3      | p.V341V  | contactin associated pro112 (0.00) | 181 (0.99) | 2.65 |
| 11-14 | Gp4 | g.chr9:117002759G>T  | Missense Mutation | COL27A1      | p.G943W  | collagen, type XXVII, a27 (0.00)   | 42 (0.17)  | 0.44 |
| 11-14 | Gp4 | g.chr9:137671980A>G  | Silent            | COL5A1       | p.T806T  | collagen, type V, alpha109 (0.00)  | 253 (0.18) | 0.47 |
| 11-14 | Gp4 | g.chr1:36565673A>G   | Silent            | COL8A2       | p.R57R   | collagen, type VIII, alph20 (0.00) | 65 (0.28)  | 0.74 |
| 11-14 | Gp4 | g.chr3:131283113A>G  | Silent            | CPNE4        | p.N336N  | copine IV 47 (0.00)                | 42 (0.12)  | 0.38 |
| 11-14 | Gp4 | g.chr16:3786138C>A   | Missense Mutation | CREBBP       | p.D1543Y | CREB binding protein 21 (0.00)     | 71 (0.39)  | 1.05 |
| 11-14 | Gp4 | g.chr15:75980028G>C  | Nonsense Mutation | CSPG4        | p.Y1126* | chondroitin sulfate prote20 (0.00) | 20 (0.85)  | 2.27 |
| 11-14 | Gp4 | g.chr8:142446166C>A  | RNA               | CTD-3064M3.7 |          | 20 (0.00)                          | 61 (0.25)  | 0.66 |
| 11-14 | Gp4 | g.chr11:66281965C>G  | Missense Mutation | CTD-3074O7.1 | p.P120R  | 57 (0.00)                          | 203 (0.91) | 2.42 |
| 11-14 | Gp4 | g.chr6:43011206A>G   | Missense Mutation | CUL7         | p.V1112A | cullin 7 30 (0.00)                 | 43 (0.16)  | 0.43 |
| 11-14 | Gp4 | g.chr17:4047287A>G   | Missense Mutation | CYB5D2       | p.S80G   | cytochrome b5 domain c40 (0.00)    | 17 (0.35)  | 0.94 |
| 11-14 | Gp4 | g.chr22:43023658G>T  | Missense Mutation | CYB5R3       | p.P167H  | cytochrome b5 reductas48 (0.00)    | 273 (0.15) | 0.40 |
| 11-14 | Gp4 | g.chr15:23002908G>A  | Silent            | CYFIP1       | p.K1210K | cytoplasmic FMR1 inter122 (0.00)   | 53 (0.98)  | 3.16 |

|       |     |                      |                   |         |          |                                      |            |      |
|-------|-----|----------------------|-------------------|---------|----------|--------------------------------------|------------|------|
| 11-14 | Gp4 | g.chr15:75042734C>A  | Missense Mutation | CYP1A2  | p.L219I  | cytochrome P450, famil 37 (0.00)     | 113 (0.98) | 2.62 |
| 11-14 | Gp4 | g.chr19:41704622G>T  | Missense Mutation | CYP2S1  | p.E221D  | cytochrome P450, famil 18 (0.00)     | 11 (0.91)  | 2.42 |
| 11-14 | Gp4 | g.chr9:124340951C>A  | Intron            | DAB2IP  |          | DAB2 interacting protei 58 (0.00)    | 127 (0.46) | 1.22 |
| 11-14 | Gp4 | g.chr9:124340952C>A  | Intron            | DAB2IP  |          | DAB2 interacting protei 58 (0.00)    | 125 (0.46) | 1.22 |
| 11-14 | Gp4 | g.chr9:124454430G>A  | Intron            | DAB2IP  |          | DAB2 interacting protei 152 (0.00)   | 22 (0.73)  | 1.94 |
| 11-14 | Gp4 | g.chr9:124459707C>A  | Intron            | DAB2IP  |          | DAB2 interacting protei 60 (0.00)    | 21 (0.90)  | 2.41 |
| 11-14 | Gp4 | g.chr9:124463024A>G  | Intron            | DAB2IP  |          | DAB2 interacting protei 54 (0.00)    | 80 (0.21)  | 0.57 |
| 11-14 | Gp4 | g.chr11:61511676G>A  | Silent            | DAGLA   | p.E948E  | diacylglycerol lipase, alj 18 (0.00) | 58 (0.16)  | 0.41 |
| 11-14 | Gp4 | g.chr19:14071189C>T  | Silent            | DCAF15  | p.V539V  | DDB1 and CUL4 associ 16 (0.00)       | 261 (0.14) | 0.38 |
| 11-14 | Gp4 | g.chr1:154996410T>G  | Missense Mutation | DCST2   | p.S590R  | DC-STAMP domain coi 19 (0.00)        | 44 (0.30)  | 0.79 |
| 11-14 | Gp4 | g.chr16:461486G>T    | Missense Mutation | DECR2   | p.A263S  | 2,4-dienoyl CoA reduct: 20 (0.00)    | 23 (0.70)  | 1.86 |
| 11-14 | Gp4 | g.chr6:35287355C>T   | Nonsense Mutation | DEF6    | p.Q424*  | differentially expressed 44 (0.00)   | 43 (0.19)  | 0.50 |
| 11-14 | Gp4 | g.chr17:40260019C>A  | Silent            | DHX58   | p.V262V  | DEXH (Asp-Glu-X-His) 26 (0.00)       | 61 (0.16)  | 0.44 |
| 11-14 | Gp4 | g.chr20:61513008A>T  | Missense Mutation | DIDO1   | p.L1434I | death inducer-obliterato: 49 (0.00)  | 102 (0.50) | 1.33 |
| 11-14 | Gp4 | g.chr15:40662336G>T  | Missense Mutation | DISP2   | p.W1341C | dispatched homolog 2 (I33 (0.00)     | 288 (0.32) | 0.86 |
| 11-14 | Gp4 | g.chr3:38163627G>A   | Missense Mutation | DLEC1   | p.A1696T | deleted in lung and esop 26 (0.00)   | 59 (0.42)  | 1.13 |
| 11-14 | Gp4 | g.chr3:52394415C>T   | Silent            | DNAH1   | p.L1554L | dynein, axonemal, heav: 66 (0.00)    | 74 (0.15)  | 0.40 |
| 11-14 | Gp4 | g.chr3:52394426G>A   | Silent            | DNAH1   | p.T1557T | dynein, axonemal, heav: 64 (0.02)    | 73 (0.15)  | 0.40 |
| 11-14 | Gp4 | g.chr3:52425541C>A   | Missense Mutation | DNAH1   | p.T3325N | dynein, axonemal, heav: 30 (0.00)    | 269 (0.33) | 0.87 |
| 11-14 | Gp4 | g.chr12:124371836C>A | Missense Mutation | DNAH10  | p.L2873I | dynein, axonemal, heav: 38 (0.00)    | 48 (0.44)  | 1.17 |
| 11-14 | Gp4 | g.chr7:21730401A>G   | Silent            | DNAH11  | p.E1981E | dynein, axonemal, heav: 59 (0.00)    | 256 (0.21) | 0.72 |
| 11-14 | Gp4 | g.chr17:76490148G>A  | Silent            | DNAH17  | p.I2121I | dynein, axonemal, heav: 32 (0.00)    | 97 (0.14)  | 0.38 |
| 11-14 | Gp4 | g.chr16:4492374C>A   | Missense Mutation | DNAJA3  | p.P246T  | DnaJ (Hsp40) homolog, 24 (0.00)      | 21 (0.76)  | 2.03 |
| 11-14 | Gp4 | g.chr11:6588836G>T   | Nonsense Mutation | DNHD1   | p.E4033* | dynein heavy chain dom 25 (0.00)     | 84 (0.36)  | 0.95 |
| 11-14 | Gp4 | g.chr21:37618023G>A  | Missense Mutation | DOPEY2  | p.A1249T | dopey family member 2 17 (0.00)      | 65 (0.31)  | 0.82 |
| 11-14 | Gp4 | g.chr19:2225411C>A   | Silent            | DOT1L   | p.I1207I | DOT1-like histone H3K 15 (0.00)      | 11 (0.73)  | 1.94 |
| 11-14 | Gp4 | g.chr7:154598750C>A  | Missense Mutation | DPP6    | p.L532M  | dipeptidyl-peptidase 6 83 (0.00)     | 37 (0.16)  | 0.52 |
| 11-14 | Gp4 | g.chr19:54140154T>C  | Missense Mutation | DPRX    | p.L163P  | divergent-paired related 71 (0.00)   | 181 (0.26) | 0.69 |
| 11-14 | Gp4 | g.chr21:41505816C>T  | Missense Mutation | DSCAM   | p.R1176K | Down syndrome cell adl 75 (0.00)     | 223 (0.71) | 1.89 |
| 11-14 | Gp4 | g.chr1:167095972G>A  | Missense Mutation | DUSP27  | p.S535N  | dual specificity phospho 90 (0.01)   | 142 (0.59) | 1.58 |
| 11-14 | Gp4 | g.chr2:71913591C>T   | Missense Mutation | DYSF    | p.A2110V | dysferlin 22 (0.00)                  | 299 (0.16) | 0.43 |
| 11-14 | Gp4 | g.chr16:67914777T>C  | Silent            | EDC4    | p.H805H  | enhancer of mRNA dec: 16 (0.00)      | 10 (0.80)  | 2.13 |
| 11-14 | Gp4 | g.chr7:36193977C>T   | Missense Mutation | EEPDI   | p.P15L   | endonuclease/exonuclea 52 (0.00)     | 32 (0.34)  | 1.17 |
| 11-14 | Gp4 | g.chr11:65350869C>T  | Missense Mutation | EHBP1L1 | p.P909L  | EH domain binding prot 75 (0.00)     | 105 (0.15) | 0.41 |
| 11-14 | Gp4 | g.chr7:6066485C>A    | Silent            | EIF2AK1 | p.P546P  | eukaryotic translation in 60 (0.00)  | 65 (0.14)  | 0.50 |



|       |     |                      |                   |          |          |                                      |            |      |
|-------|-----|----------------------|-------------------|----------|----------|--------------------------------------|------------|------|
| 11-14 | Gp4 | g.chr1:32694150C>T   | Silent            | EIF3I    | p.D193D  | eukaryotic translation in 69 (0.00)  | 69 (0.43)  | 1.16 |
| 11-14 | Gp4 | g.chr3:184038496C>T  | Missense Mutation | EIF4G1   | p.P119S  | eukaryotic translation in 21 (0.00)  | 18 (0.94)  | 3.00 |
| 11-14 | Gp4 | g.chr16:67237471C>A  | Silent            | ELMO3    | p.A681A  | engulfment and cell mot40 (0.00)     | 336 (0.32) | 0.84 |
| 11-14 | Gp4 | g.chr2:27306488C>T   | Silent            | EMILIN1  | p.D683D  | elastin microfibril interf 47 (0.00) | 65 (0.26)  | 0.70 |
| 11-14 | Gp4 | g.chr12:132547172C>A | Missense Mutation | EP400    | p.Q2754K | E1A binding protein p4(29 (0.00)     | 113 (0.23) | 0.61 |
| 11-14 | Gp4 | g.chr1:23208925G>A   | Silent            | EPHB2    | p.P459P  | EPH receptor B2 69 (0.00)            | 215 (0.17) | 0.45 |
| 11-14 | Gp4 | g.chr1:23236886C>A   | Silent            | EPHB2    | p.A839A  | EPH receptor B2 16 (0.00)            | 56 (0.14)  | 0.38 |
| 11-14 | Gp4 | g.chr3:37034287T>C   | Silent            | EPM2AIP1 | p.E94E   | EPM2A (laforin) interac 26 (0.00)    | 59 (0.22)  | 0.59 |
| 11-14 | Gp4 | g.chr7:100320468T>C  | Splice Site       | EPO      |          | erythropoietin 43 (0.00)             | 227 (0.30) | 0.97 |
| 11-14 | Gp4 | g.chr19:55597513T>C  | Missense Mutation | EPS8L1   | p.Y535H  | EPS8-like 1 17 (0.00)                | 214 (0.28) | 0.75 |
| 11-14 | Gp4 | g.chr19:55597544G>A  | Missense Mutation | EPS8L1   | p.S545N  | EPS8-like 1 21 (0.00)                | 253 (0.15) | 0.40 |
| 11-14 | Gp4 | g.chr17:37872139G>A  | Missense Mutation | ERBB2    | p.R487Q  | v-erb-b2 avian erythrobl 19 (0.00)   | 68 (0.22)  | 0.59 |
| 11-14 | Gp4 | g.chr11:124624112G>C | Missense Mutation | ESAM     | p.I285M  | endothelial cell adhesio 102 (0.00)  | 296 (0.27) | 0.71 |
| 11-14 | Gp4 | g.chr4:5798860G>T    | Silent            | EVC      | p.G666G  | Ellis van Creveld syndro 28 (0.00)   | 33 (0.27)  | 0.73 |
| 11-14 | Gp4 | g.chr8:28574324G>A   | Missense Mutation | EXTL3    | p.V250M  | exostosin-like glycosyltr 67 (0.00)  | 134 (0.95) | 2.53 |
| 11-14 | Gp4 | g.chr9:130279226G>T  | Missense Mutation | FAM129B  | p.Q295K  | family with sequence si 114 (0.00)   | 82 (0.21)  | 0.55 |
| 11-14 | Gp4 | g.chr5:137342685G>T  | Missense Mutation | FAM13B   | p.A281E  | family with sequence si 41 (0.00)    | 42 (0.48)  | 1.27 |
| 11-14 | Gp4 | g.chr8:21958234A>T   | Missense Mutation | FAM160B2 | p.S491C  | family with sequence si 33 (0.00)    | 71 (0.38)  | 1.01 |
| 11-14 | Gp4 | g.chr9:140138623C>T  | Splice Site       | FAM166A  | p.A289T  | family with sequence si 28 (0.00)    | 266 (0.16) | 0.42 |
| 11-14 | Gp4 | g.chr5:118970001G>A  | Silent            | FAM170A  | p.E186E  | family with sequence si 19 (0.00)    | 34 (0.53)  | 1.41 |
| 11-14 | Gp4 | g.chr5:118970011G>A  | Missense Mutation | FAM170A  | p.E190K  | family with sequence si 18 (0.00)    | 34 (0.44)  | 1.18 |
| 11-14 | Gp4 | g.chr3:43074290A>G   | Missense Mutation | FAM198A  | p.M179V  | family with sequence si 31 (0.00)    | 92 (0.52)  | 1.39 |
| 11-14 | Gp4 | g.chr6:82462451G>T   | Missense Mutation | FAM46A   | p.P14H   | family with sequence si 22 (0.00)    | 38 (0.47)  | 1.26 |
| 11-14 | Gp4 | g.chr20:49209715T>C  | Missense Mutation | FAM65C   | p.E740G  | family with sequence si 70 (0.00)    | 46 (0.52)  | 1.39 |
| 11-14 | Gp4 | g.chr9:131831409G>A  | Splice Site       | FAM73B   |          | family with sequence si 40 (0.00)    | 435 (0.33) | 0.88 |
| 11-14 | Gp4 | g.chr8:144812440G>T  | Missense Mutation | FAM83H   | p.P105T  | family with sequence si 28 (0.00)    | 163 (0.14) | 0.38 |
| 11-14 | Gp4 | g.chr13:99061742G>T  | Missense Mutation | FARP1    | p.C522F  | FERM, RhoGEF (ARH) 31 (0.00)         | 58 (0.21)  | 0.69 |
| 11-14 | Gp4 | g.chr1:16091687C>A   | Missense Mutation | FBLIM1   | p.A70E   | filamin binding LIM prc 18 (0.00)    | 111 (0.25) | 0.67 |
| 11-14 | Gp4 | g.chr22:45958798T>A  | Nonsense Mutation | FBLN1    | p.C568*  | fibulin 1 15 (0.00)                  | 34 (0.97)  | 2.59 |
| 11-14 | Gp4 | g.chr22:45959095C>T  | Silent            | FBLN1    | p.T667T  | fibulin 1 46 (0.00)                  | 54 (0.96)  | 2.57 |
| 11-14 | Gp4 | g.chr5:147817999G>A  | Missense Mutation | FBXO38   | p.D988N  | F-box protein 38 37 (0.00)           | 162 (0.27) | 0.71 |
| 11-14 | Gp4 | g.chr19:40433401G>A  | Nonsense Mutation | FCGBP    | p.Q290*  | Fc fragment of IgG bind 41 (0.02)    | 38 (0.71)  | 1.89 |
| 11-14 | Gp4 | g.chr11:72600883G>A  | Silent            | FCHSD2   | p.H208H  | FCH and double SH3 dc 95 (0.00)      | 14 (0.93)  | 2.48 |
| 11-14 | Gp4 | g.chr19:35850251A>G  | Missense Mutation | FFAR3    | p.I153M  | free fatty acid receptor 3 86 (0.00) | 256 (0.19) | 0.50 |
| 11-14 | Gp4 | g.chr4:15964164C>T   | Missense Mutation | FGFBP2   | p.E197K  | fibroblast growth factor 25 (0.00)   | 89 (0.34)  | 0.90 |

|       |     |                      |                   |         |          |                                                        |            |            |      |
|-------|-----|----------------------|-------------------|---------|----------|--------------------------------------------------------|------------|------------|------|
| 11-14 | Gp4 | g.chr4:153896226G>T  | Missense Mutation | FHDC1   | p.D595Y  | FH2 domain containing 16 (0.00)                        | 21 (0.29)  | 0.76       |      |
| 11-14 | Gp4 | g.chr19:18652541C>A  | Missense Mutation | FKBP8   | p.M80I   | FK506 binding protein $\epsilon$ 17 (0.00)             | 67 (0.70)  | 1.87       |      |
| 11-14 | Gp4 | g.chr7:55752849G>T   | RNA               | FKBP9L  |          | 60 (0.00)                                              | 16 (0.75)  | 2.55       |      |
| 11-14 | Gp4 | g.chr1:152276699A>G  | Missense Mutation | FLG     | p.W3555R | filaggrin                                              | 52 (0.00)  | 36 (0.33)  | 0.89 |
| 11-14 | Gp4 | g.chr1:152281361C>G  | Missense Mutation | FLG     | p.A2001P | filaggrin                                              | 110 (0.00) | 68 (0.28)  | 0.75 |
| 11-14 | Gp4 | g.chr7:128477491G>A  | Missense Mutation | FLNC    | p.E247K  | filamin C, gamma                                       | 48 (0.00)  | 343 (0.34) | 1.07 |
| 11-14 | Gp4 | g.chr7:128484816A>G  | Silent            | FLNC    | p.V1099V | filamin C, gamma                                       | 21 (0.00)  | 143 (0.92) | 2.93 |
| 11-14 | Gp4 | g.chr5:180048590G>T  | Silent            | FLT4    | p.R658R  | fms-related tyrosine kinase                            | 30 (0.00)  | 267 (0.15) | 0.39 |
| 11-14 | Gp4 | g.chr17:43319754C>A  | Silent            | FMNL1   | p.L644L  | formin-like 1                                          | 46 (0.00)  | 148 (0.28) | 0.76 |
| 11-14 | Gp4 | g.chr17:80696462C>T  | Missense Mutation | FN3K    | p.P80L   | fructosamine 3 kinase                                  | 19 (0.00)  | 149 (0.67) | 1.79 |
| 11-14 | Gp4 | g.chr11:65660756T>C  | Silent            | FOSL1   | p.K103K  | FOS-like antigen 1                                     | 35 (0.00)  | 120 (0.38) | 1.00 |
| 11-14 | Gp4 | g.chr11:126147575C>T | Silent            | FOXRED1 | p.N484N  | FAD-dependent oxidoreductase                           | 38 (0.00)  | 64 (0.56)  | 1.50 |
| 11-14 | Gp4 | g.chr19:3527007C>T   | Silent            | FZR1    | p.P139P  | fizzy/cell division cycle 25 (0.00)                    | 382 (0.18) | 0.47       |      |
| 11-14 | Gp4 | g.chr7:99821555G>A   | Nonsense Mutation | GATS    | p.Q121*  | GATS, stromal antigen 75 (0.00)                        | 242 (0.25) | 0.80       |      |
| 11-14 | Gp4 | g.chr7:150846187G>T  | Missense Mutation | GBX1    | p.A194E  | gastrulation brain homeobox 179 (0.00)                 | 133 (0.45) | 1.43       |      |
| 11-14 | Gp4 | g.chr19:13002176C>T  | Missense Mutation | GCDH    | p.L20F   | glutaryl-CoA dehydrogenase 16 (0.00)                   | 35 (0.83)  | 2.21       |      |
| 11-14 | Gp4 | g.chr16:2035884C>G   | Missense Mutation | GFER    | p.P158R  | growth factor, augmented 98 (0.01)                     | 400 (0.75) | 1.99       |      |
| 11-14 | Gp4 | g.chr5:179731826C>A  | Missense Mutation | GFPT2   | p.K596N  | glutamine-fructose-6-phosphate transaminase 117 (0.00) | 84 (0.62)  | 1.65       |      |
| 11-14 | Gp4 | g.chr22:25019142A>T  | Missense Mutation | GGT1    | p.S268C  | gamma-glutamyltransferase 20 (0.00)                    | 133 (0.59) | 1.58       |      |
| 11-14 | Gp4 | g.chr22:22989270G>A  | Missense Mutation | GGTLC2  | p.D75N   | gamma-glutamyltransferase 46 (0.00)                    | 16 (0.94)  | 2.50       |      |
| 11-14 | Gp4 | g.chr22:22989281T>C  | Silent            | GGTLC2  | p.D78D   | gamma-glutamyltransferase 49 (0.00)                    | 19 (0.89)  | 2.39       |      |
| 11-14 | Gp4 | g.chr7:100284039C>A  | Missense Mutation | GIGYF1  | p.A238S  | GRB10 interacting GYF43 (0.00)                         | 171 (0.15) | 0.46       |      |
| 11-14 | Gp4 | g.chr2:121726350T>C  | Missense Mutation | GLI2    | p.I235T  | GLI family zinc finger 226 (0.00)                      | 17 (0.35)  | 0.94       |      |
| 11-14 | Gp4 | g.chr9:36147807T>A   | Missense Mutation | GLIPR2  | p.V13D   | GLI pathogenesis-related 114 (0.00)                    | 26 (0.85)  | 2.26       |      |
| 11-14 | Gp4 | g.chr3:50290520A>G   | Missense Mutation | GNAI2   | p.D123G  | guanine nucleotide binding protein 80 (0.00)           | 49 (0.16)  | 0.44       |      |
| 11-14 | Gp4 | g.chr3:50290557T>C   | Silent            | GNAI2   | p.H135H  | guanine nucleotide binding protein 82 (0.00)           | 44 (0.27)  | 0.73       |      |
| 11-14 | Gp4 | g.chr15:72958604C>T  | Missense Mutation | GOLGA6B | p.A668V  | golgin A6 family, member 79 (0.01)                     | 139 (0.23) | 0.61       |      |
| 11-14 | Gp4 | g.chr15:28947240C>A  | Nonsense Mutation | GOLGA8M | p.G587*  | golgin A8 family, member 63 (0.00)                     | 14 (0.79)  | 2.53       |      |
| 11-14 | Gp4 | g.chr15:28947674G>A  | Missense Mutation | GOLGA8M | p.R502C  | golgin A8 family, member 95 (0.00)                     | 274 (0.41) | 1.33       |      |
| 11-14 | Gp4 | g.chr9:88650466G>A   | Nonsense Mutation | GOLM1   | p.Q278*  | golgi membrane protein 116 (0.00)                      | 240 (0.98) | 2.61       |      |
| 11-14 | Gp4 | g.chr1:27216243C>A   | Silent            | GPN2    | p.V115V  | GPN-loop GTPase 2                                      | 23 (0.00)  | 98 (0.74)  | 1.99 |
| 11-14 | Gp4 | g.chr3:119886457G>T  | Silent            | GPR156  | p.R623R  | G protein-coupled receptor 85 (0.00)                   | 125 (0.20) | 0.64       |      |
| 11-14 | Gp4 | g.chr2:128408810G>T  | Silent            | GPR17   | p.L195L  | G protein-coupled receptor 16 (0.00)                   | 190 (0.76) | 2.02       |      |
| 11-14 | Gp4 | g.chr16:10273967C>T  | Missense Mutation | GRIN2A  | p.G101E  | glutamate receptor, ionotropic 20 (0.00)               | 198 (0.23) | 0.61       |      |
| 11-14 | Gp4 | g.chr6:34004089C>A   | Missense Mutation | GRM4    | p.A600S  | glutamate receptor, metabotropic 19 (0.00)             | 223 (0.17) | 0.44       |      |

|       |     |                      |                   |          |          |                           |            |            |      |
|-------|-----|----------------------|-------------------|----------|----------|---------------------------|------------|------------|------|
| 11-14 | Gp4 | g.chr22:24325068G>T  | Missense Mutation | GSTT2    | p.G120W  | glutathione S-transferase | 40 (0.00)  | 93 (0.29)  | 0.77 |
| 11-14 | Gp4 | g.chr19:6389522C>A   | Missense Mutation | GTF2F1   | p.V87F   | general transcription fac | 35 (0.00)  | 174 (0.15) | 0.40 |
| 11-14 | Gp4 | g.chr2:27558890C>T   | Missense Mutation | GTF3C2   | p.G454D  | general transcription fac | 40 (0.00)  | 193 (0.26) | 0.69 |
| 11-14 | Gp4 | g.chr17:7918201G>C   | Silent            | GUCY2D   | p.T867T  | guanylate cyclase 2D, n   | 34 (0.00)  | 29 (0.28)  | 0.74 |
| 11-14 | Gp4 | g.chr17:7918209C>T   | Missense Mutation | GUCY2D   | p.P870L  | guanylate cyclase 2D, n   | 35 (0.00)  | 30 (0.17)  | 0.44 |
| 11-14 | Gp4 | g.chr5:21482622G>A   | RNA               | GUSBP1   |          | glucuronidase, beta pset  | 50 (0.00)  | 140 (0.40) | 1.29 |
| 11-14 | Gp4 | g.chr15:73617510C>A  | Missense Mutation | HCN4     | p.K588N  | hyperpolarization activa  | 107 (0.00) | 248 (0.31) | 0.84 |
| 11-14 | Gp4 | g.chr7:18819716C>T   | Intron            | HDAC9    |          | histone deacetylase 9     | 44 (0.00)  | 194 (0.98) | 2.61 |
| 11-14 | Gp4 | g.chr20:62193019C>T  | Silent            | HELZ2    | p.P2257P | helicase with zinc finger | 40 (0.03)  | 198 (0.95) | 2.53 |
| 11-14 | Gp4 | g.chr20:62196134G>T  | Silent            | HELZ2    | p.P1347P | helicase with zinc finger | 16 (0.00)  | 49 (0.16)  | 0.44 |
| 11-14 | Gp4 | g.chr15:28510853G>T  | Missense Mutation | HERC2    | p.P594Q  | HECT and RLD domain       | 97 (0.00)  | 40 (0.40)  | 1.29 |
| 11-14 | Gp4 | g.chr17:43227094C>T  | Silent            | HEXIM1   | p.D179D  | hexamethylene bis-acete   | 98 (0.00)  | 186 (0.20) | 0.54 |
| 11-14 | Gp4 | g.chr4:145567867G>A  | Missense Mutation | HHIP     | p.V14M   | hedgehog interacting pro  | 68 (0.00)  | 36 (0.28)  | 0.74 |
| 11-14 | Gp4 | g.chr12:51354803C>T  | Silent            | HIGD1C   | p.Y49Y   | HIG1 hypoxia inducible    | 37 (0.03)  | 53 (0.89)  | 2.36 |
| 11-14 | Gp4 | g.chr6:26225708A>T   | Missense Mutation | HIST1H3E | p.N109I  | histone cluster 1, H3e    | 126 (0.00) | 308 (0.15) | 0.39 |
| 11-14 | Gp4 | g.chr6:26250615A>T   | Silent            | HIST1H3F | p.R73R   | histone cluster 1, H3f    | 75 (0.01)  | 179 (0.31) | 0.83 |
| 11-14 | Gp4 | g.chr17:36093592G>T  | Missense Mutation | HNF1B    | p.P256H  | HNF1 homeobox B           | 106 (0.01) | 72 (0.64)  | 1.70 |
| 11-14 | Gp4 | g.chr9:86588261A>G   | Silent            | HNRNPK   | p.H152H  | heterogeneous nuclear ri  | 18 (0.00)  | 170 (0.19) | 0.50 |
| 11-14 | Gp4 | g.chr12:54350326G>T  | Missense Mutation | HOXC12   | p.R275S  | homeobox C12              | 69 (0.01)  | 200 (0.39) | 1.03 |
| 11-14 | Gp4 | g.chr1:152187628A>G  | Silent            | HRNR     | p.Y2159Y | hornerin                  | 174 (0.00) | 209 (0.22) | 0.57 |
| 11-14 | Gp4 | g.chr1:152188211C>T  | Missense Mutation | HRNR     | p.G1965D | hornerin                  | 306 (0.00) | 602 (0.15) | 0.41 |
| 11-14 | Gp4 | g.chr1:22168502C>A   | Missense Mutation | HSPG2    | p.E3062D | heparan sulfate proteogl  | 19 (0.00)  | 107 (0.46) | 1.22 |
| 11-14 | Gp4 | g.chr14:106586168G>A | RNA               | IGHV3-13 |          | immunoglobulin heavy      | 81 (0.00)  | 73 (0.48)  | 1.28 |
| 11-14 | Gp4 | g.chr3:151154702G>A  | Silent            | IGSF10   | p.H2549H | immunoglobulin superfa    | 18 (0.00)  | 27 (0.81)  | 2.59 |
| 11-14 | Gp4 | g.chr22:37524889C>A  | Splice Site       | IL2RB    |          | interleukin 2 receptor, b | 17 (0.00)  | 135 (0.23) | 0.61 |
| 11-14 | Gp4 | g.chr8:82591408G>T   | Silent            | IMPA1    | p.P85P   | inositol(myo)-1(or 4)-m   | 55 (0.00)  | 129 (0.45) | 1.20 |
| 11-14 | Gp4 | g.chr3:10276163T>A   | Missense Mutation | IRAK2    | p.D431E  | interleukin-1 receptor-a  | 46 (0.00)  | 164 (0.67) | 1.79 |
| 11-14 | Gp4 | g.chr19:46388141G>C  | Missense Mutation | IRF2BP1  | p.H298D  | interferon regulatory fac | 47 (0.00)  | 57 (0.16)  | 0.42 |
| 11-14 | Gp4 | g.chr2:227660544C>T  | Missense Mutation | IRS1     | p.G971R  | insulin receptor substrat | 70 (0.00)  | 99 (0.47)  | 1.27 |
| 11-14 | Gp4 | g.chr2:227661138G>C  | Missense Mutation | IRS1     | p.H773D  | insulin receptor substrat | 40 (0.00)  | 115 (0.23) | 0.60 |
| 11-14 | Gp4 | g.chr2:227661169G>T  | Silent            | IRS1     | p.L762L  | insulin receptor substrat | 46 (0.02)  | 154 (0.31) | 0.83 |
| 11-14 | Gp4 | g.chr17:3660424C>A   | Missense Mutation | ITGAE    | p.G342V  | integrin, alpha E (antige | 99 (0.00)  | 188 (0.24) | 0.65 |
| 11-14 | Gp4 | g.chr17:3664384G>T   | Missense Mutation | ITGAE    | p.A174D  | integrin, alpha E (antige | 82 (0.01)  | 98 (0.98)  | 2.61 |
| 11-14 | Gp4 | g.chr21:46320388C>T  | Silent            | ITGB2    | p.E191E  | integrin, beta 2 (comple  | 21 (0.00)  | 117 (0.66) | 2.33 |
| 11-14 | Gp4 | g.chr6:33636791C>T   | Silent            | ITPR3    | p.L683L  | inositol 1,4,5-trisphosph | 26 (0.00)  | 55 (0.16)  | 0.44 |

|       |     |                      |                   |           |          |                           |            |            |      |
|-------|-----|----------------------|-------------------|-----------|----------|---------------------------|------------|------------|------|
| 11-14 | Gp4 | g.chr6:33638221C>T   | Missense Mutation | ITPR3     | p.P770L  | inositol 1,4,5-trisphosph | 50 (0.00)  | 328 (0.20) | 0.54 |
| 11-14 | Gp4 | g.chr20:10622452A>G  | Silent            | JAG1      | p.N887N  | jagged 1                  | 106 (0.00) | 84 (0.42)  | 1.11 |
| 11-14 | Gp4 | g.chr6:24358083G>T   | Silent            | KAAG1     | p.T72T   | kidney associated antige  | 24 (0.00)  | 177 (0.18) | 0.48 |
| 11-14 | Gp4 | g.chr3:123988039T>C  | Silent            | KALRN     | p.H300H  | kalirin, RhoGEF kinase    | 45 (0.00)  | 27 (0.89)  | 2.82 |
| 11-14 | Gp4 | g.chr12:5153809G>A   | Missense Mutation | KCNA5     | p.D166N  | potassium voltage-gated   | 24 (0.00)  | 144 (0.92) | 2.44 |
| 11-14 | Gp4 | g.chr19:18096236G>T  | Missense Mutation | KCNN1     | p.G345C  | potassium intermediate/   | 29 (0.00)  | 56 (0.84)  | 2.24 |
| 11-14 | Gp4 | g.chr20:62070966G>A  | Silent            | KCNQ2     | p.F304F  | potassium voltage-gated   | 24 (0.00)  | 257 (0.39) | 1.03 |
| 11-14 | Gp4 | g.chr7:128548463A>C  | RNA               | KCP       |          | kielin/chordin-like prote | 33 (0.00)  | 236 (0.26) | 0.83 |
| 11-14 | Gp4 | g.chr11:67022444C>A  | Missense Mutation | KDM2A     | p.A1136D | lysine (K)-specific demε  | 124 (0.00) | 306 (0.21) | 0.57 |
| 11-14 | Gp4 | g.chr7:142640054C>A  | Missense Mutation | KEL       | p.A617S  | Kell blood group, metal   | 20 (0.05)  | 115 (0.99) | 3.15 |
| 11-14 | Gp4 | g.chr17:26955373G>A  | Missense Mutation | KIAA0100  | p.P1502S | KIAA0100                  | 56 (0.00)  | 54 (0.93)  | 2.47 |
| 11-14 | Gp4 | g.chr17:73486329G>T  | Silent            | KIAA0195  | p.L323L  | KIAA0195                  | 27 (0.00)  | 126 (0.20) | 0.53 |
| 11-14 | Gp4 | g.chr17:73494298C>A  | Missense Mutation | KIAA0195  | p.L1178I | KIAA0195                  | 41 (0.00)  | 71 (0.54)  | 1.43 |
| 11-14 | Gp4 | g.chr4:123145810C>A  | Missense Mutation | KIAA1109  | p.T924K  | KIAA1109                  | 27 (0.00)  | 78 (0.14)  | 0.38 |
| 11-14 | Gp4 | g.chr10:24790456G>T  | Missense Mutation | KIAA1217  | p.Q344H  | KIAA1217                  | 19 (0.00)  | 260 (0.47) | 1.26 |
| 11-14 | Gp4 | g.chr6:138615148G>A  | Silent            | KIAA1244  | p.T1129T | KIAA1244                  | 64 (0.00)  | 20 (0.80)  | 2.13 |
| 11-14 | Gp4 | g.chr9:139700974G>A  | Silent            | KIAA1984  | p.K376K  |                           | 29 (0.00)  | 88 (0.36)  | 0.97 |
| 11-14 | Gp4 | g.chr1:200969535G>T  | Silent            | KIF21B    | p.V556V  | kinesin family member     | 126 (0.00) | 282 (0.17) | 0.46 |
| 11-14 | Gp4 | g.chr2:10188476G>C   | Missense Mutation | KLF11     | p.A338P  | Kruppel-like factor 11    | 34 (0.00)  | 39 (0.90)  | 2.39 |
| 11-14 | Gp4 | g.chr1:6653470G>T    | Missense Mutation | KLHL21    | p.D583E  | kelch-like family memb    | 25 (0.00)  | 46 (0.41)  | 0.89 |
| 11-14 | Gp4 | g.chr15:86311790C>T  | Missense Mutation | KLHL25    | p.D418N  | kelch-like family memb    | 38 (0.00)  | 15 (0.33)  | 0.89 |
| 11-14 | Gp4 | g.chr12:49425391G>A  | Missense Mutation | KMT2D     | p.A4366V | lysine (K)-specific meth  | 43 (0.00)  | 134 (0.16) | 0.44 |
| 11-14 | Gp4 | g.chr10:135038349G>T | Silent            | KNDC1     | p.R1735R | kinase non-catalytic C-l  | 20 (0.00)  | 31 (0.19)  | 0.52 |
| 11-14 | Gp4 | g.chr1:152732664C>A  | Silent            | KPRP      | p.T200T  | keratinocyte proline-ric  | 124 (0.00) | 149 (0.14) | 0.38 |
| 11-14 | Gp4 | g.chr12:53069014T>C  | Missense Mutation | KRT1      | p.K633R  | keratin 1                 | 152 (0.00) | 16 (0.81)  | 2.17 |
| 11-14 | Gp4 | g.chr17:38975767A>G  | Splice Site       | KRT10     |          | keratin 10                | 53 (0.00)  | 148 (0.31) | 0.83 |
| 11-14 | Gp4 | g.chr17:18344869G>T  | RNA               | KRT16P1   |          | keratin 16 pseudogene     | 144 (0.00) | 54 (0.15)  | 0.40 |
| 11-14 | Gp4 | g.chr17:20405890G>A  | RNA               | KRT16P3   |          | keratin 16 pseudogene     | 341 (0.00) | 107 (0.26) | 0.70 |
| 11-14 | Gp4 | g.chr17:20407221C>T  | RNA               | KRT16P3   |          | keratin 16 pseudogene     | 393 (0.00) | 24 (0.50)  | 1.33 |
| 11-14 | Gp4 | g.chr17:39553531G>A  | Silent            | KRT31     | p.L87L   | keratin 31                | 56 (0.00)  | 13 (0.69)  | 1.85 |
| 11-14 | Gp4 | g.chr12:52908748G>C  | Missense Mutation | KRT5      | p.S584C  | keratin 5                 | 24 (0.00)  | 27 (0.19)  | 0.49 |
| 11-14 | Gp4 | g.chr17:39183407T>G  | Start Codon SNP   | KRTAP1-5  | p.M1L    | keratin associated protei | 41 (0.00)  | 93 (0.99)  | 2.64 |
| 11-14 | Gp4 | g.chr21:45993926G>T  | Silent            | KRTAP10-4 | p.L97L   | keratin associated protei | 67 (0.00)  | 199 (0.13) | 0.44 |
| 11-14 | Gp4 | g.chr21:46086507G>T  | Silent            | KRTAP12-2 | p.S99S   | keratin associated protei | 52 (0.00)  | 67 (0.15)  | 0.53 |
| 11-14 | Gp4 | g.chr17:39273987C>A  | Missense Mutation | KRTAP4-11 | p.C194F  | keratin associated protei | 26 (0.00)  | 222 (0.42) | 1.12 |

|       |     |                      |                   |           |          |                           |            |            |      |
|-------|-----|----------------------|-------------------|-----------|----------|---------------------------|------------|------------|------|
| 11-14 | Gp4 | g.chr17:39274016G>T  | Nonsense Mutation | KRTAP4-11 | p.C184*  | keratin associated protei | 23 (0.00)  | 223 (0.55) | 1.47 |
| 11-14 | Gp4 | g.chr5:154173706G>A  | Silent            | LARP1     | p.E295E  | La ribonucleoprotein do   | 27 (0.00)  | 16 (0.94)  | 2.50 |
| 11-14 | Gp4 | g.chr16:67977041T>C  | Missense Mutation | LCAT      | p.K77E   | lecithin-cholesterol acyl | 44 (0.02)  | 121 (0.33) | 0.88 |
| 11-14 | Gp4 | g.chr1:22142481C>A   | Missense Mutation | LDLRAD2   | p.P186H  | low density lipoprotein   | 159 (0.00) | 28 (0.96)  | 2.57 |
| 11-14 | Gp4 | g.chr13:21894510G>A  | lincRNA           | LINC00539 |          | long intergenic non-prot  | 37 (0.00)  | 28 (0.96)  | 2.57 |
| 11-14 | Gp4 | g.chr1:201868736G>A  | Missense Mutation | LMOD1     | p.R469C  | leiomodoin 1 (smooth mu   | 52 (0.00)  | 173 (0.34) | 0.91 |
| 11-14 | Gp4 | g.chr19:14269266C>A  | Missense Mutation | LPHN1     | p.G755C  | latrophilin 1             | 17 (0.00)  | 47 (0.47)  | 1.25 |
| 11-14 | Gp4 | g.chr8:145746727G>T  | Missense Mutation | LRRC14    | p.E449D  | leucine rich repeat conta | 26 (0.00)  | 150 (0.25) | 0.66 |
| 11-14 | Gp4 | g.chr15:101605734G>A | Missense Mutation | LRRK1     | p.V1698M | leucine-rich repeat kinas | 85 (0.00)  | 54 (0.70)  | 1.88 |
| 11-14 | Gp4 | g.chr17:48818533C>A  | Missense Mutation | LUC7L3    | p.L93I   | LUC7-like 3 (S. cerevisi  | 57 (0.00)  | 54 (0.98)  | 2.62 |
| 11-14 | Gp4 | g.chr7:77674717C>A   | Intron            | MAGI2     |          | membrane associated gu    | 134 (0.00) | 66 (0.98)  | 2.63 |
| 11-14 | Gp4 | g.chr7:78197022C>T   | Intron            | MAGI2     |          | membrane associated gu    | 114 (0.01) | 169 (0.99) | 2.65 |
| 11-14 | Gp4 | g.chr7:78347033T>C   | Intron            | MAGI2     |          | membrane associated gu    | 25 (0.00)  | 47 (0.26)  | 0.68 |
| 11-14 | Gp4 | g.chr7:78409723C>T   | Intron            | MAGI2     |          | membrane associated gu    | 83 (0.01)  | 192 (0.79) | 2.10 |
| 11-14 | Gp4 | g.chr7:78415712C>A   | Intron            | MAGI2     |          | membrane associated gu    | 105 (0.00) | 21 (0.76)  | 2.03 |
| 11-14 | Gp4 | g.chr15:43819773C>T  | Silent            | MAP1A     | p.S2272S | microtubule-associated j  | 65 (0.00)  | 68 (0.53)  | 1.41 |
| 11-14 | Gp4 | g.chr17:61770961G>T  | Nonsense Mutation | MAP3K3    | p.E565*  | mitogen-activated protei  | 95 (0.00)  | 481 (0.19) | 0.49 |
| 11-14 | Gp4 | g.chr19:45767964G>A  | Silent            | MARK4     | p.E126E  | MAP/microtubule affini    | 78 (0.00)  | 94 (0.78)  | 2.07 |
| 11-14 | Gp4 | g.chr19:45767968G>A  | Missense Mutation | MARK4     | p.E128K  | MAP/microtubule affini    | 76 (0.00)  | 92 (0.79)  | 2.12 |
| 11-14 | Gp4 | g.chr3:186953985C>A  | Missense Mutation | MASP1     | p.Q445H  | mannan-binding lectin s   | 43 (0.00)  | 131 (0.22) | 0.70 |
| 11-14 | Gp4 | g.chr18:74696849C>T  | Splice Site       | MBP       | p.G183E  | myelin basic protein      | 39 (0.03)  | 115 (0.70) | 2.40 |
| 11-14 | Gp4 | g.chr11:119185394C>A | Nonsense Mutation | MCAM      | p.E156*  | melanoma cell adhesion    | 25 (0.00)  | 44 (0.32)  | 0.85 |
| 11-14 | Gp4 | g.chr7:99693552G>A   | Silent            | MCM7      | p.A480A  | minichromosome maint      | 30 (0.00)  | 166 (0.99) | 3.14 |
| 11-14 | Gp4 | g.chr6:119149201C>T  | Missense Mutation | MCM9      | p.V541M  | minichromosome maint      | 76 (0.00)  | 33 (0.15)  | 0.40 |
| 11-14 | Gp4 | g.chr1:156437879C>A  | Missense Mutation | MEF2D     | p.R487L  | myocyte enhancer facto    | 30 (0.00)  | 141 (0.17) | 0.45 |
| 11-14 | Gp4 | g.chr15:66222218C>A  | Missense Mutation | MEGF11    | p.W471L  | multiple EGF-like-dom     | 22 (0.00)  | 16 (0.38)  | 1.00 |
| 11-14 | Gp4 | g.chr8:8749111C>T    | Silent            | MFHAS1    | p.V486V  | malignant fibrous histio  | 21 (0.00)  | 86 (0.27)  | 0.71 |
| 11-14 | Gp4 | g.chr22:37872998C>A  | Missense Mutation | MFNG      | p.A195S  | MFNG O-fucosylpeptid      | 25 (0.00)  | 64 (0.92)  | 2.46 |
| 11-14 | Gp4 | g.chr2:24244563C>T   | Missense Mutation | MFSD2B    | p.P243S  | major facilitator superfa | 17 (0.00)  | 51 (0.22)  | 0.58 |
| 11-14 | Gp4 | g.chr16:14306239A>G  | Silent            | MKL2      | p.E83E   | MKL/myocardin-like 2      | 19 (0.00)  | 35 (0.20)  | 0.53 |
| 11-14 | Gp4 | g.chr16:55519210G>A  | Splice Site       | MMP2      |          | matrix metallopeptidase   | 27 (0.00)  | 78 (0.99)  | 2.63 |
| 11-14 | Gp4 | g.chr11:18955861C>T  | Silent            | MRGPRX1   | p.E157E  | MAS-related GPR, men      | 62 (0.00)  | 187 (0.74) | 1.98 |
| 11-14 | Gp4 | g.chr2:234737372C>A  | Silent            | MROH2A    | p.R1404R | maestro heat-like repeat  | 49 (0.00)  | 40 (0.15)  | 0.40 |
| 11-14 | Gp4 | g.chr1:55136168A>T   | Splice Site       | MROH7     |          | maestro heat-like repeat  | 19 (0.00)  | 18 (0.61)  | 1.63 |
| 11-14 | Gp4 | g.chr1:55174727T>C   | Silent            | MROH7     | p.D1236D | maestro heat-like repeat  | 51 (0.00)  | 40 (0.40)  | 1.07 |

|       |     |                     |                   |         |          |                           |            |            |      |
|-------|-----|---------------------|-------------------|---------|----------|---------------------------|------------|------------|------|
| 11-14 | Gp4 | g.chr19:10368911T>C | Silent            | MRPL4   | p.H153H  | mitochondrial ribosomal   | 16 (0.00)  | 45 (0.76)  | 2.01 |
| 11-14 | Gp4 | g.chr17:55752460G>A | Silent            | MSI2    | p.P306P  | musashi RNA-binding p     | 18 (0.00)  | 15 (0.33)  | 0.89 |
| 11-14 | Gp4 | g.chr1:237060345C>G | Nonsense Mutation | MTR     | p.S1213* | 5-methyltetrahydrofolate  | 52 (0.00)  | 23 (0.61)  | 1.62 |
| 11-14 | Gp4 | g.chr11:1265401G>C  | Missense Mutation | MUC5B   | p.G2431R | mucin 5B, oligomeric m    | 19 (0.00)  | 134 (0.76) | 2.03 |
| 11-14 | Gp4 | g.chr11:1265418C>T  | Silent            | MUC5B   | p.L2436L | mucin 5B, oligomeric m    | 19 (0.00)  | 132 (0.76) | 2.02 |
| 11-14 | Gp4 | g.chr11:1018717G>C  | Missense Mutation | MUC6    | p.P1362A | mucin 6, oligomeric mu    | 28 (0.00)  | 40 (0.50)  | 1.33 |
| 11-14 | Gp4 | g.chr11:69063368A>G | Missense Mutation | MYEOV   | p.N151D  | myeloma overexpressed     | 18 (0.00)  | 119 (0.18) | 0.47 |
| 11-14 | Gp4 | g.chr16:15814768C>G | Missense Mutation | MYH11   | p.K1573N | myosin, heavy chain 11,   | 44 (0.00)  | 44 (0.18)  | 0.48 |
| 11-14 | Gp4 | g.chr17:1371298A>G  | Silent            | MYO1C   | p.D925D  | myosin IC                 | 19 (0.00)  | 54 (0.19)  | 0.49 |
| 11-14 | Gp4 | g.chr19:17212916C>G | Missense Mutation | MYO9B   | p.T130R  | myosin IXB                | 44 (0.00)  | 130 (0.18) | 0.49 |
| 11-14 | Gp4 | g.chr8:2027660G>A   | Silent            | MYOM2   | p.E494E  | myomesin 2                | 82 (0.00)  | 71 (0.89)  | 2.37 |
| 11-14 | Gp4 | g.chr8:2092662C>T   | Silent            | MYOM2   | p.I1385I | myomesin 2                | 108 (0.00) | 38 (0.71)  | 1.89 |
| 11-14 | Gp4 | g.chr8:2092675C>T   | Missense Mutation | MYOM2   | p.H1390Y | myomesin 2                | 50 (0.00)  | 44 (0.64)  | 1.70 |
| 11-14 | Gp4 | g.chr12:57486865C>A | Missense Mutation | NAB2    | p.P388H  | NGFI-A binding protein    | 61 (0.00)  | 192 (0.35) | 0.94 |
| 11-14 | Gp4 | g.chr11:71184324G>T | Splice Site       | NADSYN1 | p.E154*  | NAD synthetase 1          | 53 (0.00)  | 268 (0.29) | 0.77 |
| 11-14 | Gp4 | g.chr22:42463293A>G | Splice Site       | NAGA    | p.V109A  | N-acetylgalactosaminid    | 18 (0.00)  | 70 (0.14)  | 0.38 |
| 11-14 | Gp4 | g.chr7:100818086C>A | Start Codon SNP   | NAT16   | p.M1I    | N-acetyltransferase 16    | 16 (0.00)  | 40 (0.57)  | 1.83 |
| 11-14 | Gp4 | g.chr3:47045568C>A  | Splice Site       | NBEAL2  | p.G1961G | neurobeachin-like 2       | 53 (0.00)  | 264 (0.50) | 1.33 |
| 11-14 | Gp4 | g.chr22:50960840A>G | Silent            | NCAPH2  | p.A434A  | non-SMC condensin II c    | 37 (0.00)  | 138 (0.72) | 1.91 |
| 11-14 | Gp4 | g.chr3:48718768G>A  | Silent            | NCKIPSD | p.A348A  | NCK interacting protein   | 51 (0.00)  | 263 (0.32) | 0.85 |
| 11-14 | Gp4 | g.chr3:130799379C>T | Missense Mutation | NEK11   | p.H95Y   | NIMA-related kinase 11    | 16 (0.00)  | 99 (0.19)  | 0.61 |
| 11-14 | Gp4 | g.chr18:77170907C>G | Missense Mutation | NFATC1  | p.S211C  | nuclear factor of activat | 25 (0.00)  | 178 (0.63) | 1.69 |
| 11-14 | Gp4 | g.chr18:77246330C>A | Silent            | NFATC1  | p.L712L  | nuclear factor of activat | 98 (0.00)  | 287 (0.15) | 0.40 |
| 11-14 | Gp4 | g.chr16:69374112G>A | Silent            | NIP7    | p.K53K   | NIP7, nucleolar pre-rRN   | 60 (0.00)  | 74 (0.57)  | 1.51 |
| 11-14 | Gp4 | g.chr3:52523622C>A  | Nonsense Mutation | NISCH   | p.C1128* | nischarin                 | 37 (0.00)  | 42 (0.29)  | 0.76 |
| 11-14 | Gp4 | g.chr3:138023809T>G | Missense Mutation | NME9    | p.T233P  | NME/NM23 family me        | 50 (0.00)  | 144 (0.12) | 0.40 |
| 11-14 | Gp4 | g.chr19:15302358C>T | Missense Mutation | NOTCH3  | p.G305S  | notch 3                   | 17 (0.00)  | 120 (0.32) | 0.84 |
| 11-14 | Gp4 | g.chr4:156135197C>A | Missense Mutation | NPY2R   | p.P36T   | neuropeptide Y receptor   | 34 (0.00)  | 126 (0.75) | 2.01 |
| 11-14 | Gp4 | g.chr4:156135213T>A | Missense Mutation | NPY2R   | p.I41K   | neuropeptide Y receptor   | 28 (0.00)  | 169 (0.18) | 0.47 |
| 11-14 | Gp4 | g.chr11:47283146C>T | Missense Mutation | NR1H3   | p.R253C  | nuclear receptor subfam   | 32 (0.00)  | 81 (0.37)  | 0.99 |
| 11-14 | Gp4 | g.chr5:92923765C>A  | Silent            | NR2F1   | p.R202R  | nuclear receptor subfam   | 35 (0.00)  | 59 (0.20)  | 0.54 |
| 11-14 | Gp4 | g.chr12:52448947T>C | Missense Mutation | NR4A1   | p.Y279H  | nuclear receptor subfam   | 102 (0.00) | 173 (0.16) | 0.43 |
| 11-14 | Gp4 | g.chr11:51411939G>A | Missense Mutation | OR4A5   | p.H153Y  | olfactory receptor, famil | 34 (0.00)  | 15 (0.53)  | 1.42 |
| 11-14 | Gp4 | g.chr11:51412079C>T | Missense Mutation | OR4A5   | p.G106D  | olfactory receptor, famil | 23 (0.00)  | 18 (0.50)  | 1.33 |
| 11-14 | Gp4 | g.chr9:125551323G>A | Missense Mutation | OR5C1   | p.V38I   | olfactory receptor, famil | 57 (0.00)  | 83 (0.36)  | 0.96 |

|       |     |                      |                   |          |          |                            |            |            |      |
|-------|-----|----------------------|-------------------|----------|----------|----------------------------|------------|------------|------|
| 11-14 | Gp4 | g.chr2:240984789C>T  | Missense Mutation | OR6B3    | p.C234Y  | olfactory receptor, famil  | 48 (0.00)  | 62 (0.79)  | 2.11 |
| 11-14 | Gp4 | g.chr12:133196910C>T | Silent            | P2RX2    | p.H204H  | purinergic receptor P2X    | 43 (0.00)  | 169 (0.60) | 1.61 |
| 11-14 | Gp4 | g.chr1:26315943C>T   | Silent            | PAFAH2   | p.A80A   | platelet-activating facto  | 125 (0.00) | 57 (0.89)  | 2.39 |
| 11-14 | Gp4 | g.chr12:56720699C>T  | Missense Mutation | PAN2     | p.D322N  | PAN2 poly(A) specific      | 127 (0.00) | 10 (0.90)  | 2.40 |
| 11-14 | Gp4 | g.chr3:51978417C>A   | Silent            | PARP3    | p.G115G  | poly (ADP-ribose) poly     | 112 (0.00) | 386 (0.17) | 0.46 |
| 11-14 | Gp4 | g.chr1:154918685G>T  | Missense Mutation | PBXIP1   | p.H489N  | pre-B-cell leukemia hon    | 61 (0.00)  | 29 (0.45)  | 1.20 |
| 11-14 | Gp4 | g.chr1:154918775C>A  | Missense Mutation | PBXIP1   | p.A459S  | pre-B-cell leukemia hon    | 70 (0.00)  | 60 (0.47)  | 1.24 |
| 11-14 | Gp4 | g.chr13:67477723G>A  | Silent            | PCDH9    | p.S1017S | protocadherin 9            | 40 (0.00)  | 77 (0.99)  | 3.18 |
| 11-14 | Gp4 | g.chr5:140209338C>A  | Missense Mutation | PCDHA6   | p.F554L  | protocadherin alpha 6      | 42 (0.00)  | 190 (0.14) | 0.38 |
| 11-14 | Gp4 | g.chr5:140215864C>T  | Silent            | PCDHA7   | p.S632S  | protocadherin alpha 7      | 21 (0.00)  | 130 (0.69) | 1.85 |
| 11-14 | Gp4 | g.chr5:140810756G>A  | Missense Mutation | PCDHGA12 | p.E144K  | protocadherin gamma st     | 243 (0.00) | 259 (0.42) | 1.12 |
| 11-14 | Gp4 | g.chr5:140810773G>A  | Silent            | PCDHGA12 | p.E149E  | protocadherin gamma st     | 263 (0.00) | 238 (0.75) | 1.99 |
| 11-14 | Gp4 | g.chr20:44576197G>T  | Missense Mutation | PCIF1    | p.A640S  | PDX1 C-terminal inhibi     | 31 (0.00)  | 87 (0.26)  | 0.70 |
| 11-14 | Gp4 | g.chr5:32087665G>A   | Missense Mutation | PDZD2    | p.E1371K | PDZ domain containing      | 28 (0.00)  | 19 (0.95)  | 3.05 |
| 11-14 | Gp4 | g.chr3:73433215G>A   | Silent            | PDZRN3   | p.P551P  | PDZ domain containing      | 24 (0.00)  | 75 (0.23)  | 0.73 |
| 11-14 | Gp4 | g.chr11:66238721G>T  | Missense Mutation | PELI3    | p.G54V   | pellino E3 ubiquitin pro   | 31 (0.00)  | 86 (0.38)  | 1.02 |
| 11-14 | Gp4 | g.chr17:8052792C>T   | Missense Mutation | PER1     | p.G281R  | period circadian clock     | 117 (0.00) | 85 (0.32)  | 0.85 |
| 11-14 | Gp4 | g.chr3:179519752G>A  | Missense Mutation | PEX5L    | p.P582L  | peroxisomal biogenesis     | 39 (0.00)  | 68 (0.99)  | 3.13 |
| 11-14 | Gp4 | g.chr17:8172503C>T   | Missense Mutation | PFAS     | p.P1313L | phosphoribosylformylgl     | 22 (0.00)  | 101 (0.67) | 1.80 |
| 11-14 | Gp4 | g.chr5:133901941C>T  | Missense Mutation | PHF15    | p.P369S  |                            | 22 (0.00)  | 32 (0.78)  | 2.08 |
| 11-14 | Gp4 | g.chr16:30768193C>T  | Silent            | PHKG2    | p.T332T  | phosphorylase kinase, g    | 41 (0.00)  | 168 (0.57) | 1.51 |
| 11-14 | Gp4 | g.chr18:60501230A>G  | Intron            | PHLPP1   |          | PH domain and leucine      | 43 (0.00)  | 54 (0.43)  | 1.14 |
| 11-14 | Gp4 | g.chr19:4013223G>T   | Silent            | PIAS4    | p.V110V  | protein inhibitor of activ | 20 (0.05)  | 131 (0.23) | 0.61 |
| 11-14 | Gp4 | g.chr16:88786872G>T  | Missense Mutation | PIEZO1   | p.A1957D | piezo-type mechanosens     | 42 (0.00)  | 195 (0.41) | 1.09 |
| 11-14 | Gp4 | g.chr1:160001473G>T  | Silent            | PIGM     | p.A19A   | phosphatidylinositol gly   | 16 (0.00)  | 89 (0.20)  | 0.54 |
| 11-14 | Gp4 | g.chr10:98469522G>T  | Missense Mutation | PIK3AP1  | p.H78N   | phosphoinositide-3-kina    | 32 (0.00)  | 112 (0.21) | 0.57 |
| 11-14 | Gp4 | g.chr1:9777144C>T    | Missense Mutation | PIK3CD   | p.P303L  | phosphatidylinositol-4,5   | 43 (0.00)  | 76 (0.50)  | 1.08 |
| 11-14 | Gp4 | g.chr3:130424435C>T  | Missense Mutation | PIK3R4   | p.A968T  | phosphoinositide-3-kina    | 62 (0.00)  | 29 (0.97)  | 3.07 |
| 11-14 | Gp4 | g.chr16:81155212G>T  | RNA               | PKD1L2   |          | polycystic kidney diseas   | 31 (0.00)  | 143 (0.73) | 1.96 |
| 11-14 | Gp4 | g.chr19:40882562C>T  | Missense Mutation | PLD3     | p.R356C  | phospholipase D family     | 46 (0.00)  | 113 (0.83) | 2.22 |
| 11-14 | Gp4 | g.chr8:145009186C>A  | Missense Mutation | PLEC     | p.R410M  | plectin                    | 20 (0.00)  | 134 (0.69) | 1.83 |
| 11-14 | Gp4 | g.chr12:6424816G>T   | Splice Site       | PLEKHG6  |          | pleckstrin homology do     | 16 (0.00)  | 72 (0.68)  | 1.81 |
| 11-14 | Gp4 | g.chr2:43906044G>A   | Missense Mutation | PLEKHH2  | p.A56T   | pleckstrin homology do     | 157 (0.00) | 101 (0.83) | 2.22 |
| 11-14 | Gp4 | g.chr19:17476251G>C  | Silent            | PLVAP    | p.S341S  | plasmalemma vesicle as     | 19 (0.00)  | 23 (0.35)  | 0.93 |
| 11-14 | Gp4 | g.chr3:126735824G>C  | Missense Mutation | PLXNA1   | p.A1074P | plexin A1                  | 31 (0.00)  | 97 (0.12)  | 0.39 |

|       |     |                     |                   |           |          |                           |            |            |      |
|-------|-----|---------------------|-------------------|-----------|----------|---------------------------|------------|------------|------|
| 11-14 | Gp4 | g.chr3:129280708C>A | Missense Mutation | PLXND1    | p.D1622Y | plexin D1                 | 16 (0.00)  | 35 (0.17)  | 0.54 |
| 11-14 | Gp4 | g.chr22:44342116A>G | Missense Mutation | PNPLA3    | p.K434E  | patatin-like phospholipa  | 38 (0.00)  | 402 (0.63) | 1.67 |
| 11-14 | Gp4 | g.chr19:14043542G>T | Silent            | PODNL1    | p.V505V  | podocan-like 1            | 29 (0.00)  | 162 (0.77) | 2.06 |
| 11-14 | Gp4 | g.chr3:121240990A>G | Missense Mutation | POLQ      | p.V372A  | polymerase (DNA direc     | 94 (0.00)  | 40 (0.60)  | 1.91 |
| 11-14 | Gp4 | g.chr8:22106091A>G  | Missense Mutation | POLR3D    | p.E195G  | polymerase (RNA) III      | 156 (0.00) | 39 (0.95)  | 2.53 |
| 11-14 | Gp4 | g.chr2:130877612G>T | Silent            | POTEF     | p.V159V  | POTE ankyrin domain f     | 123 (0.00) | 288 (0.51) | 1.35 |
| 11-14 | Gp4 | g.chr14:19553589G>T | Missense Mutation | POTEG     | p.R58M   | POTE ankyrin domain f     | 50 (0.02)  | 31 (0.55)  | 1.46 |
| 11-14 | Gp4 | g.chr6:35391771C>A  | Missense Mutation | PPARD     | p.A158E  | peroxisome proliferator-  | 16 (0.00)  | 47 (0.60)  | 1.59 |
| 11-14 | Gp4 | g.chr5:149212744A>G | Missense Mutation | PPARGC1B  | p.T370A  | peroxisome proliferator-  | 18 (0.00)  | 50 (0.40)  | 1.07 |
| 11-14 | Gp4 | g.chr1:3102840G>T   | Missense Mutation | PRDM16    | p.K63N   | PR domain containing      | 141 (0.00) | 299 (0.21) | 0.56 |
| 11-14 | Gp4 | g.chr7:716929G>T    | Missense Mutation | PRKAR1B   | p.T126N  | protein kinase, cAMP-d    | 30 (0.00)  | 21 (0.95)  | 3.40 |
| 11-14 | Gp4 | g.chr1:107599753C>T | Missense Mutation | PRMT6     | p.P139L  | protein arginine methylt  | 33 (0.00)  | 112 (0.24) | 0.64 |
| 11-14 | Gp4 | g.chr20:5282749G>A  | Silent            | PROKR2    | p.D364D  | prokineticin receptor 2   | 40 (0.03)  | 88 (0.77)  | 2.06 |
| 11-14 | Gp4 | g.chr11:60670102C>T | Missense Mutation | PRPF19    | p.G139S  | pre-mRNA processing f     | 60 (0.00)  | 109 (0.17) | 0.44 |
| 11-14 | Gp4 | g.chr5:139192935G>T | Missense Mutation | PSD2      | p.S138I  | pleckstrin and Sec7 dor   | 35 (0.00)  | 79 (0.16)  | 0.44 |
| 11-14 | Gp4 | g.chr10:23482635T>C | Missense Mutation | PTF1A     | p.S263P  | pancreas specific transcr | 71 (0.00)  | 11 (0.82)  | 2.18 |
| 11-14 | Gp4 | g.chr10:23482738C>T | Missense Mutation | PTF1A     | p.T297I  | pancreas specific transcr | 50 (0.00)  | 13 (0.77)  | 2.05 |
| 11-14 | Gp4 | g.chr19:46205078C>T | Silent            | QPCTL     | p.N303N  | glutaminyl-peptide cycl   | 58 (0.00)  | 75 (0.95)  | 2.52 |
| 11-14 | Gp4 | g.chr1:180165706C>A | Missense Mutation | QSOX1     | p.T593N  | quiescin Q6 sulfhydryl c  | 51 (0.00)  | 129 (0.16) | 0.43 |
| 11-14 | Gp4 | g.chr20:42965835T>A | Missense Mutation | R3HDML    | p.L13Q   | R3H domain containing     | 19 (0.00)  | 176 (0.18) | 0.47 |
| 11-14 | Gp4 | g.chr16:570807G>A   | Missense Mutation | RAB11FIP3 | p.E747K  | RAB11 family interactir   | 22 (0.00)  | 77 (0.26)  | 0.69 |
| 11-14 | Gp4 | g.chr16:28926053C>A | Missense Mutation | RABEP2    | p.K161N  | rabaptin, RAB GTPase l    | 21 (0.00)  | 41 (0.54)  | 1.43 |
| 11-14 | Gp4 | g.chr14:24736083G>T | Missense Mutation | RABGGTA   | p.L65I   | Rab geranylgeranyltrans   | 26 (0.00)  | 222 (0.20) | 0.53 |
| 11-14 | Gp4 | g.chr3:120449574G>A | Missense Mutation | RABL3     | p.S36L   | RAB, member of RAS c      | 49 (0.00)  | 111 (0.99) | 3.15 |
| 11-14 | Gp4 | g.chr3:120449577G>A | Missense Mutation | RABL3     | p.P35L   | RAB, member of RAS c      | 49 (0.00)  | 113 (0.99) | 3.15 |
| 11-14 | Gp4 | g.chr3:141327352G>C | Missense Mutation | RASA2     | p.E680Q  | RAS p21 protein activat   | 45 (0.00)  | 31 (0.90)  | 2.87 |
| 11-14 | Gp4 | g.chr4:40440436G>A  | Missense Mutation | RBM47     | p.P159S  | RNA binding motif prot    | 44 (0.00)  | 236 (0.49) | 1.31 |
| 11-14 | Gp4 | g.chr12:7280979G>T  | Missense Mutation | RBP5      | p.L37M   | retinol binding protein   | 536 (0.00) | 94 (0.96)  | 2.55 |
| 11-14 | Gp4 | g.chr1:17747283C>T  | Silent            | RCC2      | p.G262G  | regulator of chromosom    | 82 (0.01)  | 17 (0.47)  | 1.25 |
| 11-14 | Gp4 | g.chr1:17752146C>A  | Silent            | RCC2      | p.G138G  | regulator of chromosom    | 39 (0.00)  | 77 (0.43)  | 1.14 |
| 11-14 | Gp4 | g.chr11:63681979T>C | Missense Mutation | RCOR2     | p.Y172C  | REST corepressor 2        | 103 (0.00) | 468 (0.21) | 0.57 |
| 11-14 | Gp4 | g.chr17:73627535G>C | Missense Mutation | RECQL5    | p.F481L  | RecQ protein-like 5       | 26 (0.00)  | 47 (0.36)  | 0.96 |
| 11-14 | Gp4 | g.chr1:192613530G>A | Splice Site       | RGS13     |          | regulator of G-protein si | 19 (0.00)  | 49 (0.47)  | 1.25 |
| 11-14 | Gp4 | g.chr8:22873158G>T  | Missense Mutation | RHOBTB2   | p.C645F  | Rho-related BTB domai     | 30 (0.00)  | 80 (0.69)  | 1.83 |
| 11-14 | Gp4 | g.chr16:67685168G>T | Missense Mutation | RLTPR     | p.A755S  | RGD motif, leucine rich   | 113 (0.00) | 23 (0.35)  | 0.93 |



|       |     |                      |                   |               |         |                            |           |            |      |
|-------|-----|----------------------|-------------------|---------------|---------|----------------------------|-----------|------------|------|
| 11-14 | Gp4 | g.chr9:94487198C>T   | Missense Mutation | ROR2          | p.M526I | receptor tyrosine kinase   | 67 (0.00) | 166 (0.62) | 1.65 |
| 11-14 | Gp4 | g.chr8:92883015G>A   | lincRNA           | RP11-122C21.1 |         |                            | 17 (0.00) | 114 (0.22) | 0.58 |
| 11-14 | Gp4 | g.chr14:101324732C>A | RNA               | RP11-123M6.2  |         |                            | 17 (0.00) | 100 (0.63) | 1.68 |
| 11-14 | Gp4 | g.chr9:66458674T>G   | lincRNA           | RP11-262H14.1 |         |                            | 21 (0.00) | 42 (0.19)  | 0.51 |
| 11-14 | Gp4 | g.chr1:143426628C>T  | lincRNA           | RP11-435B5.4  |         |                            | 31 (0.00) | 28 (0.82)  | 2.19 |
| 11-14 | Gp4 | g.chr14:24600979T>C  | Missense Mutation | RP11-468E2.6  | p.S257P |                            | 31 (0.00) | 30 (0.93)  | 2.49 |
| 11-14 | Gp4 | g.chr4:105708864C>A  | lincRNA           | RP11-556I14.2 |         |                            | 22 (0.00) | 25 (0.20)  | 0.53 |
| 11-14 | Gp4 | g.chr10:52418960G>T  | RNA               | RP11-564C4.6  |         |                            | 36 (0.00) | 74 (0.24)  | 0.65 |
| 11-14 | Gp4 | g.chr14:20136974C>A  | RNA               | RP11-597A11.1 |         |                            | 47 (0.00) | 63 (0.35)  | 0.93 |
| 11-14 | Gp4 | g.chr12:90313340A>T  | lincRNA           | RP11-654D12.2 |         |                            | 85 (0.00) | 320 (0.15) | 0.39 |
| 11-14 | Gp4 | g.chr17:78820353A>G  | Silent            | RPTOR         | p.E431E | regulatory associated pr   | 18 (0.00) | 24 (0.42)  | 1.11 |
| 11-14 | Gp4 | g.chr3:51970353G>A   | Missense Mutation | RRP9          | p.R219C | ribosomal RNA process      | 48 (0.00) | 114 (0.48) | 1.29 |
| 11-14 | Gp4 | g.chr2:234229328G>A  | Silent            | SAG           | p.V78V  | S-antigen; retina and pir  | 59 (0.00) | 295 (0.29) | 0.77 |
| 11-14 | Gp4 | g.chr16:51175862G>A  | Missense Mutation | SALL1         | p.P91S  | spalt-like transcription f | 67 (0.00) | 135 (0.74) | 1.98 |
| 11-14 | Gp4 | g.chr20:50408315C>G  | Missense Mutation | SALL4         | p.R236P | spalt-like transcription f | 28 (0.00) | 57 (0.77)  | 2.06 |
| 11-14 | Gp4 | g.chr7:92733327T>A   | Missense Mutation | SAMD9         | p.Y695F | sterile alpha motif doma   | 94 (0.00) | 11 (0.91)  | 2.89 |
| 11-14 | Gp4 | g.chr22:50900508C>T  | Missense Mutation | SBF1          | p.G813S | SET binding factor 1       | 21 (0.00) | 16 (0.50)  | 1.33 |
| 11-14 | Gp4 | g.chr7:29963574C>T   | Silent            | SCRN1         | p.*415* | secernin 1                 | 82 (0.00) | 26 (0.23)  | 0.79 |
| 11-14 | Gp4 | g.chr9:139298580C>T  | Missense Mutation | SDCCAG3       | p.V379M | serologically defined co   | 19 (0.00) | 159 (0.64) | 1.69 |
| 11-14 | Gp4 | g.chr9:139298593A>G  | Silent            | SDCCAG3       | p.G374G | serologically defined co   | 21 (0.00) | 158 (0.62) | 1.65 |
| 11-14 | Gp4 | g.chr22:30887595T>C  | Missense Mutation | SEC14L4       | p.E349G | SEC14-like 4 (S. cerevis   | 35 (0.00) | 35 (0.20)  | 0.53 |
| 11-14 | Gp4 | g.chr15:90771594A>G  | Missense Mutation | SEMA4B        | p.K745E | sema domain, immunog       | 61 (0.00) | 103 (0.17) | 0.47 |
| 11-14 | Gp4 | g.chr2:74907149C>G   | Missense Mutation | SEMA4F        | p.T709S | sema domain, immunog       | 18 (0.00) | 79 (0.73)  | 1.96 |
| 11-14 | Gp4 | g.chr15:74703929T>C  | Silent            | SEMA7A        | p.Q515Q | semaphorin 7A, GPI me      | 22 (0.00) | 76 (0.39)  | 1.05 |
| 11-14 | Gp4 | g.chr8:22020698G>A   | Missense Mutation | SFTPC         | p.V50M  | surfactant protein C       | 80 (0.00) | 314 (0.28) | 0.75 |
| 11-14 | Gp4 | g.chr17:48245326G>T  | Missense Mutation | SGCA          | p.D111Y | sarcoglycan, alpha (50k    | 20 (0.00) | 149 (0.91) | 2.43 |
| 11-14 | Gp4 | g.chr22:40804387C>G  | Missense Mutation | SGSM3         | p.P579R | small G protein signalin   | 26 (0.00) | 36 (0.72)  | 1.93 |
| 11-14 | Gp4 | g.chrX:123504056C>T  | Missense Mutation | SH2D1A        | p.R78W  | SH2 domain containing      | 29 (0.00) | 178 (0.89) | 1.49 |
| 11-14 | Gp4 | g.chr1:21053551C>A   | Silent            | SH2D5         | p.R62R  | SH2 domain containing      | 29 (0.00) | 117 (0.34) | 0.91 |
| 11-14 | Gp4 | g.chr22:38038905G>A  | Silent            | SH3BP1        | p.K96K  | SH3-domain binding pr      | 18 (0.00) | 199 (0.32) | 0.84 |
| 11-14 | Gp4 | g.chr19:4365564C>T   | Silent            | SH3GL1        | p.K82K  | SH3-domain GRB2-like       | 23 (0.00) | 224 (0.17) | 0.44 |
| 11-14 | Gp4 | g.chr11:70332059G>T  | Missense Mutation | SHANK2        | p.Q851K | SH3 and multiple ankyr     | 15 (0.00) | 113 (0.19) | 0.52 |
| 11-14 | Gp4 | g.chr1:154458520G>A  | Silent            | SHE           | p.I400I | Src homology 2 domain      | 26 (0.00) | 14 (0.79)  | 2.10 |
| 11-14 | Gp4 | g.chr3:72866019G>A   | Intron            | SHQ1          |         | SHQ1, H/ACA ribonucl       | 50 (0.00) | 138 (0.99) | 2.65 |
| 11-14 | Gp4 | g.chr19:50474661G>T  | RNA               | SIGLEC16      |         | sialic acid binding Ig-lik | 21 (0.00) | 56 (0.36)  | 0.95 |

|       |     |                      |                   |          |          |                                     |            |      |
|-------|-----|----------------------|-------------------|----------|----------|-------------------------------------|------------|------|
| 11-14 | Gp4 | g.chr19:52034443G>T  | Missense Mutation | SIGLEC6  | p.T133K  | sialic acid binding Ig-lik85 (0.00) | 47 (0.98)  | 2.61 |
| 11-14 | Gp4 | g.chr10:21805248C>A  | Missense Mutation | SKIDA1   | p.A502S  | SKI/DACH domain con 22 (0.00)       | 17 (0.53)  | 1.41 |
| 11-14 | Gp4 | g.chr2:219258871C>A  | Missense Mutation | SLC11A1  | p.T448K  | solute carrier family 11 33 (0.00)  | 33 (0.15)  | 0.40 |
| 11-14 | Gp4 | g.chr11:65004169G>A  | RNA               | SLC22A20 |          | solute carrier family 22, 15 (0.00) | 17 (0.47)  | 1.25 |
| 11-14 | Gp4 | g.chr22:18069992C>T  | Missense Mutation | SLC25A18 | p.T167I  | solute carrier family 25 67 (0.00)  | 203 (0.17) | 0.45 |
| 11-14 | Gp4 | g.chr17:8197798C>A   | Missense Mutation | SLC25A35 | p.A110S  | solute carrier family 25, 16 (0.00) | 89 (0.81)  | 2.16 |
| 11-14 | Gp4 | g.chr12:58014034G>A  | Missense Mutation | SLC26A10 | p.A11T   | solute carrier family 26, 21 (0.00) | 39 (0.41)  | 1.09 |
| 11-14 | Gp4 | g.chr20:45354527C>T  | Silent            | SLC2A10  | p.T284T  | solute carrier family 2 (t58 (0.00) | 127 (0.22) | 0.59 |
| 11-14 | Gp4 | g.chr22:24226045G>A  | Silent            | SLC2A11  | p.V357V  | solute carrier family 2 (t19 (0.00) | 207 (0.20) | 0.54 |
| 11-14 | Gp4 | g.chr6:137245505C>T  | Nonsense Mutation | SLC35D3  | p.Q308*  | solute carrier family 35, 18 (0.00) | 50 (0.30)  | 0.80 |
| 11-14 | Gp4 | g.chr11:124950604G>A | Missense Mutation | SLC37A2  | p.G208S  | solute carrier family 37 19 (0.00)  | 26 (0.31)  | 0.82 |
| 11-14 | Gp4 | g.chr17:79220703C>T  | Missense Mutation | SLC38A10 | p.E742K  | solute carrier family 38, 18 (0.00) | 257 (0.30) | 0.79 |
| 11-14 | Gp4 | g.chr1:205628740C>A  | Missense Mutation | SLC45A3  | p.M428I  | solute carrier family 45, 20 (0.00) | 179 (0.18) | 0.48 |
| 11-14 | Gp4 | g.chr7:150773165C>T  | Silent            | SLC4A2   | p.A1165A | solute carrier family 4 (t42 (0.00) | 89 (0.31)  | 1.00 |
| 11-14 | Gp4 | g.chr3:195955762G>A  | Missense Mutation | SLC51A   | p.V202I  | solute carrier family 51, 58 (0.00) | 61 (0.15)  | 0.47 |
| 11-14 | Gp4 | g.chr10:98803137G>A  | Missense Mutation | SLIT1    | p.L663F  | slit homolog 1 (Drosoph 18 (0.00)   | 96 (0.30)  | 0.81 |
| 11-14 | Gp4 | g.chr17:18219120A>G  | Missense Mutation | SMCR8    | p.D6G    | Smith-Magenis syndrom 87 (0.00)     | 159 (0.36) | 0.97 |
| 11-14 | Gp4 | g.chr22:31494659C>T  | Silent            | SMTN     | p.F722F  | smoothelin 23 (0.00)                | 50 (0.24)  | 0.64 |
| 11-14 | Gp4 | g.chr15:25444673G>A  | RNA               | SNHG14   |          | small nucleolar RNA ho43 (0.00)     | 40 (0.75)  | 2.42 |
| 11-14 | Gp4 | g.chr21:34924000G>T  | Missense Mutation | SON      | p.M821I  | SON DNA binding prot 19 (0.00)      | 20 (0.75)  | 2.00 |
| 11-14 | Gp4 | g.chr17:4863076C>T   | Missense Mutation | SPAG7    | p.A134T  | sperm associated antigen 45 (0.00)  | 37 (0.19)  | 0.50 |
| 11-14 | Gp4 | g.chr19:11258496C>T  | Missense Mutation | SPC24    | p.G162D  | SPC24, NDC80 kinetoc 31 (0.00)      | 86 (0.28)  | 0.74 |
| 11-14 | Gp4 | g.chr7:44047017C>T   | Silent            | SPDYE1   | p.N261N  | speedy/RINGO cell cycl 75 (0.00)    | 113 (0.12) | 0.42 |
| 11-14 | Gp4 | g.chr2:220348890G>T  | Silent            | SPEG     | p.L2235L | SPEG complex locus 32 (0.00)        | 67 (0.31)  | 0.84 |
| 11-14 | Gp4 | g.chr2:220354108A>G  | Missense Mutation | SPEG     | p.R2790G | SPEG complex locus 19 (0.00)        | 16 (0.94)  | 2.50 |
| 11-14 | Gp4 | g.chr12:64238640C>A  | Missense Mutation | SRGAP1   | p.A15D   | SLIT-ROBO Rho GTPa 97 (0.00)        | 145 (0.88) | 2.35 |
| 11-14 | Gp4 | g.chr1:206634474C>T  | Silent            | SRGAP2   | p.D835D  | SLIT-ROBO Rho GTPa 61 (0.00)        | 205 (0.48) | 1.29 |
| 11-14 | Gp4 | g.chr7:149482199T>C  | RNA               | SSPO     |          | SCO-spondin 20 (0.00)               | 52 (0.15)  | 0.49 |
| 11-14 | Gp4 | g.chr7:149524132C>T  | RNA               | SSPO     |          | SCO-spondin 45 (0.00)               | 21 (0.24)  | 0.76 |
| 11-14 | Gp4 | g.chr1:155989883A>G  | Missense Mutation | SSR2     | p.S26P   | signal sequence receptor 44 (0.00)  | 109 (0.64) | 1.71 |
| 11-14 | Gp4 | g.chr4:98633916T>C   | Silent            | STPG2    | p.L418L  | sperm-tail PG-rich repeat 41 (0.00) | 19 (0.32)  | 0.84 |
| 11-14 | Gp4 | g.chr4:98633957C>A   | Missense Mutation | STPG2    | p.A405S  | sperm-tail PG-rich repeat 39 (0.00) | 18 (0.33)  | 0.89 |
| 11-14 | Gp4 | g.chr7:905596C>A     | Missense Mutation | SUN1     | p.S661R  | Sad1 and UNC84 domain 65 (0.00)     | 117 (0.77) | 2.75 |
| 11-14 | Gp4 | g.chr6:10942926C>A   | Nonsense Mutation | SYCP2L   | p.S634*  | synaptonemal complex 16 (0.00)      | 46 (0.15)  | 0.41 |
| 11-14 | Gp4 | g.chr19:46327053C>T  | Silent            | SYMPK    | p.T857T  | symplekin 24 (0.00)                 | 36 (0.42)  | 1.11 |

|       |     |                      |                   |          |          |                           |            |            |      |
|-------|-----|----------------------|-------------------|----------|----------|---------------------------|------------|------------|------|
| 11-14 | Gp4 | g.chr19:46328476C>A  | Missense Mutation | SYMPK    | p.A815S  | symplekin                 | 54 (0.00)  | 291 (0.27) | 0.71 |
| 11-14 | Gp4 | g.chr14:74876181T>G  | Silent            | SYNDIG1L | p.T89T   | synapse differentiation i | 20 (0.00)  | 92 (0.48)  | 1.28 |
| 11-14 | Gp4 | g.chr14:95912318C>G  | Missense Mutation | SYNE3    | p.E520D  | spectrin repeat containir | 76 (0.00)  | 50 (0.24)  | 0.64 |
| 11-14 | Gp4 | g.chr14:95918626G>T  | Missense Mutation | SYNE3    | p.P411Q  | spectrin repeat containir | 17 (0.00)  | 108 (0.37) | 0.99 |
| 11-14 | Gp4 | g.chr10:46961986C>G  | Missense Mutation | SYT15    | p.R417P  | synaptotagmin XV          | 43 (0.00)  | 382 (0.23) | 0.61 |
| 11-14 | Gp4 | g.chr10:123843200C>A | Silent            | TACC2    | p.G395G  | transforming, acidic coil | 33 (0.00)  | 146 (0.59) | 1.57 |
| 11-14 | Gp4 | g.chr7:99709858G>A   | Missense Mutation | TAF6     | p.P235L  | TAF6 RNA polymerase       | 16 (0.00)  | 49 (0.67)  | 2.14 |
| 11-14 | Gp4 | g.chr1:1267143C>A    | Missense Mutation | TAS1R3   | p.P106H  | taste receptor, type 1, m | 24 (0.00)  | 89 (0.31)  | 0.84 |
| 11-14 | Gp4 | g.chr17:25748606C>T  | RNA               | TBC1D3P5 |          | TBC1 domain family, r     | 39 (0.00)  | 59 (0.90)  | 2.40 |
| 11-14 | Gp4 | g.chr4:141543720C>T  | Missense Mutation | TBC1D9   | p.G1144R | TBC1 domain family, r     | 24 (0.00)  | 262 (0.16) | 0.42 |
| 11-14 | Gp4 | g.chr5:179318431C>G  | Missense Mutation | TBC1D9B  | p.C331S  | TBC1 domain family, r     | 55 (0.00)  | 68 (0.37)  | 0.98 |
| 11-14 | Gp4 | g.chr2:74327794C>T   | Silent            | TET3     | p.N1158N | tet methylcytosine dioxy  | 93 (0.00)  | 326 (0.22) | 0.59 |
| 11-14 | Gp4 | g.chr6:41658524C>T   | Silent            | TFEB     | p.P115P  | transcription factor EB   | 54 (0.00)  | 97 (0.39)  | 1.04 |
| 11-14 | Gp4 | g.chr20:36759525C>A  | Missense Mutation | TGM2     | p.G628V  | transglutaminase 2        | 56 (0.00)  | 16 (0.31)  | 0.83 |
| 11-14 | Gp4 | g.chr20:36775290A>G  | Missense Mutation | TGM2     | p.C230R  | transglutaminase 2        | 16 (0.00)  | 75 (0.16)  | 0.43 |
| 11-14 | Gp4 | g.chr2:242572485G>A  | Missense Mutation | THAP4    | p.R363W  | THAP domain containir     | 19 (0.00)  | 21 (0.29)  | 0.76 |
| 11-14 | Gp4 | g.chr6:169648883G>C  | Missense Mutation | THBS2    | p.Q80E   | thrombospondin 2          | 17 (0.00)  | 100 (0.45) | 1.20 |
| 11-14 | Gp4 | g.chr19:2790438G>A   | Silent            | THOP1    | p.A12A   | thimet oligopeptidase 1   | 28 (0.00)  | 12 (0.75)  | 2.00 |
| 11-14 | Gp4 | g.chr19:4818274C>A   | Missense Mutation | TICAM1   | p.G39V   | toll-like receptor adapto | 22 (0.00)  | 111 (0.49) | 1.30 |
| 11-14 | Gp4 | g.chr16:84520355G>T  | Silent            | TLDC1    | p.S280S  | TBC/LysM-associated d     | 39 (0.00)  | 60 (0.72)  | 1.91 |
| 11-14 | Gp4 | g.chr3:52255714A>G   | Silent            | TLR9     | p.L1026L | toll-like receptor 9      | 29 (0.00)  | 159 (0.42) | 1.11 |
| 11-14 | Gp4 | g.chr17:79288254G>T  | Silent            | TMEM105  | p.L3L    | transmembrane protein     | 18 (0.00)  | 92 (0.36)  | 0.96 |
| 11-14 | Gp4 | g.chr17:21101642C>T  | Missense Mutation | TMEM11   | p.V192I  | transmembrane protein     | 68 (0.00)  | 75 (0.99)  | 2.63 |
| 11-14 | Gp4 | g.chr2:98409367C>A   | Missense Mutation | TMEM131  | p.G1209V | transmembrane protein     | 20 (0.00)  | 40 (0.57)  | 1.53 |
| 11-14 | Gp4 | g.chr11:60699230G>A  | Silent            | TMEM132A | p.A363A  | transmembrane protein     | 147 (0.00) | 331 (0.40) | 1.07 |
| 11-14 | Gp4 | g.chr19:19243175C>T  | Silent            | TMEM161A | p.T143T  | transmembrane protein     | 85 (0.01)  | 193 (0.81) | 2.17 |
| 11-14 | Gp4 | g.chr18:5891811C>T   | Silent            | TMEM200C | p.E84E   | transmembrane protein     | 20 (0.00)  | 26 (0.42)  | 1.13 |
| 11-14 | Gp4 | g.chr19:11453770C>A  | Silent            | TMEM205  | p.T97T   | transmembrane protein     | 33 (0.00)  | 71 (0.45)  | 1.20 |
| 11-14 | Gp4 | g.chr9:104239033G>A  | Silent            | TMEM246  | p.G114G  | transmembrane protein     | 25 (0.00)  | 46 (0.26)  | 0.70 |
| 11-14 | Gp4 | g.chr1:1849482A>G    | Missense Mutation | TMEM52   | p.Y157H  | transmembrane protein     | 21 (0.00)  | 265 (0.25) | 0.65 |
| 11-14 | Gp4 | g.chr19:4298054C>T   | Missense Mutation | TMIGD2   | p.C112Y  | transmembrane and inm     | 29 (0.00)  | 42 (0.48)  | 1.27 |
| 11-14 | Gp4 | g.chr3:33135265G>C   | Silent            | TMPPE    | p.A4A    | transmembrane protein     | 17 (0.00)  | 115 (0.19) | 0.51 |
| 11-14 | Gp4 | g.chr6:138202435G>T  | Missense Mutation | TNFAIP3  | p.Q784H  | tumor necrosis factor, al | 51 (0.00)  | 63 (0.32)  | 0.85 |
| 11-14 | Gp4 | g.chr11:57076064G>A  | Missense Mutation | TNKS1BP1 | p.P1374L | tankyrase 1 binding prot  | 51 (0.00)  | 183 (0.36) | 0.96 |
| 11-14 | Gp4 | g.chr1:175375469C>A  | Missense Mutation | TNR      | p.A128S  | tenascin R                | 59 (0.00)  | 130 (0.56) | 1.50 |

|       |     |                      |                   |          |           |                                       |            |      |
|-------|-----|----------------------|-------------------|----------|-----------|---------------------------------------|------------|------|
| 11-14 | Gp4 | g.chr7:5347914G>A    | Silent            | TNRC18   | p.D2910D  | trinucleotide repeat cont 20 (0.00)   | 277 (0.29) | 1.02 |
| 11-14 | Gp4 | g.chr7:5353485G>T    | Missense Mutation | TNRC18   | p.A2346D  | trinucleotide repeat cont 20 (0.00)   | 118 (0.20) | 0.73 |
| 11-14 | Gp4 | g.chr7:5391720C>A    | Missense Mutation | TNRC18   | p.D1734Y  | trinucleotide repeat cont 16 (0.00)   | 264 (0.13) | 0.47 |
| 11-14 | Gp4 | g.chr17:7583368G>T   | Intron            | TP53     |           | tumor protein p53 130 (0.01)          | 270 (0.39) | 1.03 |
| 11-14 | Gp4 | g.chr1:3662512A>G    | RNA               | TP73-AS1 |           | TP73 antisense RNA 1 24 (0.00)        | 49 (0.55)  | 1.47 |
| 11-14 | Gp4 | g.chr11:68840124A>T  | Missense Mutation | TPCN2    | p.Q364L   | two pore segment chann22 (0.00)       | 155 (0.19) | 0.50 |
| 11-14 | Gp4 | g.chr3:14105817C>A   | Missense Mutation | TPRXL    | p.S47R    | tetra-peptide repeat hom27 (0.00)     | 59 (0.41)  | 1.08 |
| 11-14 | Gp4 | g.chr3:36898075G>A   | Silent            | TRANK1   | p.A452A   | tetratricopeptide repeat ;80 (0.00)   | 36 (0.97)  | 2.59 |
| 11-14 | Gp4 | g.chr11:49053187A>T  | Missense Mutation | TRIM49B  | p.E12D    | tripartite motif containir 145 (0.00) | 34 (0.50)  | 1.33 |
| 11-14 | Gp4 | g.chr7:72738598C>A   | Missense Mutation | TRIM50   | p.S63I    | tripartite motif containir 21 (0.00)  | 44 (0.34)  | 0.91 |
| 11-14 | Gp4 | g.chr1:231339694T>C  | Missense Mutation | TRIM67   | p.F539S   | tripartite motif containir 18 (0.00)  | 84 (0.23)  | 0.60 |
| 11-14 | Gp4 | g.chr7:75028446G>A   | Missense Mutation | TRIM73   | p.A77T    | tripartite motif containir 18 (0.00)  | 53 (0.40)  | 1.06 |
| 11-14 | Gp4 | g.chr10:104414984C>T | Missense Mutation | TRIM8    | p.L272F   | tripartite motif containir 50 (0.00)  | 155 (0.19) | 0.50 |
| 11-14 | Gp4 | g.chr10:104416056C>A | Missense Mutation | TRIM8    | p.S321Y   | tripartite motif containir 22 (0.00)  | 18 (0.67)  | 1.78 |
| 11-14 | Gp4 | g.chr7:142569511C>A  | Silent            | TRPV6    | p.G709G   | transient receptor potent67 (0.00)    | 245 (0.22) | 0.70 |
| 11-14 | Gp4 | g.chr18:72998340G>A  | Missense Mutation | TSHZ1    | p.M326I   | teashirt zinc finger hom;28 (0.00)    | 10 (0.80)  | 2.76 |
| 11-14 | Gp4 | g.chr18:72998921G>A  | Missense Mutation | TSHZ1    | p.S520N   | teashirt zinc finger hom;18 (0.00)    | 170 (0.18) | 0.63 |
| 11-14 | Gp4 | g.chr18:72998925G>A  | Silent            | TSHZ1    | p.E521E   | teashirt zinc finger hom;18 (0.00)    | 169 (0.18) | 0.63 |
| 11-14 | Gp4 | g.chr19:31769943C>T  | Silent            | TSHZ3    | p.K252K   | teashirt zinc finger hom;214 (0.00)   | 422 (0.54) | 1.43 |
| 11-14 | Gp4 | g.chr19:31770009C>T  | Silent            | TSHZ3    | p.T230T   | teashirt zinc finger hom;183 (0.00)   | 391 (0.42) | 1.12 |
| 11-14 | Gp4 | g.chr2:178483005C>T  | Missense Mutation | TTC30A   | p.G142E   | tetratricopeptide repeat ;146 (0.00)  | 324 (0.35) | 0.94 |
| 11-14 | Gp4 | g.chr1:51774983C>A   | Silent            | TTC39A   | p.V178V   | tetratricopeptide repeat ;67 (0.00)   | 101 (0.19) | 0.50 |
| 11-14 | Gp4 | g.chr2:47278901G>A   | Silent            | TTC7A    | p.S678S   | tetratricopeptide repeat ;24 (0.00)   | 98 (0.65)  | 1.74 |
| 11-14 | Gp4 | g.chr20:36634605C>T  | Missense Mutation | TTI1     | p.E833K   | TELO2 interacting prote;140 (0.01)    | 39 (0.62)  | 1.64 |
| 11-14 | Gp4 | g.chr17:46867398T>C  | Missense Mutation | TTLL6    | p.D432G   | tubulin tyrosine ligase-li33 (0.00)   | 104 (0.26) | 0.69 |
| 11-14 | Gp4 | g.chr2:179534373C>T  | Missense Mutation | TTN      | p.E11806K | titin 100 (0.00)                      | 58 (0.98)  | 2.62 |
| 11-14 | Gp4 | g.chr17:72245499C>G  | Nonsense Mutation | TTYH2    | p.Y297*   | tweety family member 231 (0.00)       | 67 (0.28)  | 0.76 |
| 11-14 | Gp4 | g.chr17:72246101T>C  | Silent            | TTYH2    | p.L319L   | tweety family member 231 (0.00)       | 203 (0.17) | 0.45 |
| 11-14 | Gp4 | g.chr6:3225759C>A    | Silent            | TUBB2B   | p.S188S   | tubulin, beta 2B class III 105 (0.00) | 171 (0.53) | 1.42 |
| 11-14 | Gp4 | g.chr16:90001957C>T  | Silent            | TUBB3    | p.T713T   | tubulin, beta 3 class III 110 (0.00)  | 322 (0.83) | 2.22 |
| 11-14 | Gp4 | g.chr19:6495983G>T   | Nonsense Mutation | TUBB4A   | p.S176*   | tubulin, beta 4A class IV 33 (0.00)   | 156 (0.35) | 0.94 |
| 11-14 | Gp4 | g.chr10:94026G>A     | Silent            | TUBB8    | p.A102A   | tubulin, beta 8 class VII 54 (0.00)   | 347 (0.40) | 1.08 |
| 11-14 | Gp4 | g.chr16:90161490C>A  | RNA               | TUBB8P7  |           | tubulin, beta 8 class VII 20 (0.00)   | 18 (0.44)  | 1.19 |
| 11-14 | Gp4 | g.chr22:50659377C>G  | Silent            | TUBGCP6  | p.V1137V  | tubulin, gamma comple;26 (0.00)       | 51 (0.65)  | 1.73 |
| 11-14 | Gp4 | g.chr17:74387662C>G  | Missense Mutation | UBE2O    | p.E1081Q  | ubiquitin-conjugating er 36 (0.00)    | 59 (0.66)  | 1.76 |

|       |     |                      |                   |         |          |                                     |            |      |
|-------|-----|----------------------|-------------------|---------|----------|-------------------------------------|------------|------|
| 11-14 | Gp4 | g.chr19:4929264G>T   | RNA               | UHRF1   |          | ubiquitin-like with PHD29 (0.00)    | 155 (0.63) | 1.69 |
| 11-14 | Gp4 | g.chr19:4929573G>A   | RNA               | UHRF1   |          | ubiquitin-like with PHD30 (0.00)    | 34 (0.32)  | 0.86 |
| 11-14 | Gp4 | g.chr15:91496525C>A  | Missense Mutation | UNC45A  | p.S854R  | unc-45 homolog A (C. e 60 (0.00)    | 294 (0.29) | 0.76 |
| 11-14 | Gp4 | g.chr4:96104198G>T   | Nonsense Mutation | UNC5C   | p.Y767*  | unc-5 homolog C (C. elc 66 (0.00)   | 36 (0.97)  | 2.59 |
| 11-14 | Gp4 | g.chr6:167719436G>A  | Missense Mutation | UNC93A  | p.V292I  | unc-93 homolog A (C. e 178 (0.00)   | 720 (0.27) | 0.71 |
| 11-14 | Gp4 | g.chr11:113704196C>T | Silent            | USP28   | p.P235P  | ubiquitin specific peptid90 (0.00)  | 129 (0.58) | 1.55 |
| 11-14 | Gp4 | g.chr17:76799835C>A  | Missense Mutation | USP36   | p.K814N  | ubiquitin specific peptid32 (0.00)  | 139 (0.73) | 1.96 |
| 11-14 | Gp4 | g.chr17:9604721G>T   | Missense Mutation | USP43   | p.G572V  | ubiquitin specific peptid43 (0.00)  | 203 (0.29) | 0.78 |
| 11-14 | Gp4 | g.chr17:9604779G>T   | Missense Mutation | USP43   | p.R591S  | ubiquitin specific peptid35 (0.00)  | 129 (0.33) | 0.89 |
| 11-14 | Gp4 | g.chr4:1374749C>A    | Silent            | UVSSA   | p.R612R  | UV-stimulated scaffold 24 (0.00)    | 110 (0.31) | 0.82 |
| 11-14 | Gp4 | g.chr3:38048166A>G   | Missense Mutation | VILL    | p.E811G  | villin-like 17 (0.00)               | 120 (0.33) | 0.87 |
| 11-14 | Gp4 | g.chr3:38048460G>T   | Missense Mutation | VILL    | p.D829Y  | villin-like 92 (0.00)               | 37 (0.22)  | 0.58 |
| 11-14 | Gp4 | g.chr3:38048515G>C   | Missense Mutation | VILL    | p.R847P  | villin-like 93 (0.00)               | 40 (0.20)  | 0.53 |
| 11-14 | Gp4 | g.chr3:42568929T>C   | Silent            | VIPR1   | p.I148I  | vasoactive intestinal pept29 (0.00) | 33 (0.82)  | 2.18 |
| 11-14 | Gp4 | g.chr22:22599388C>A  | Missense Mutation | VPREB1  | p.P26Q   | pre-B lymphocyte 1 25 (0.00)        | 141 (0.21) | 0.57 |
| 11-14 | Gp4 | g.chr8:100883812G>A  | Missense Mutation | VPS13B  | p.D3903N | vacuolar protein sorting 118 (0.00) | 90 (0.26)  | 0.68 |
| 11-14 | Gp4 | g.chr16:22144318C>T  | Missense Mutation | VWA3A   | p.T657I  | von Willebrand factor A46 (0.00)    | 163 (0.51) | 1.36 |
| 11-14 | Gp4 | g.chr7:73280023G>A   | Nonsense Mutation | WBSCR28 | p.W206*  | Williams-Beuren syndrc 55 (0.00)    | 284 (0.20) | 0.53 |
| 11-14 | Gp4 | g.chrX:48463283G>A   | Missense Mutation | WDR13   | p.A441T  | WD repeat domain 13 19 (0.00)       | 74 (0.51)  | 0.86 |
| 11-14 | Gp4 | g.chr2:20189764G>T   | Missense Mutation | WDR35   | p.L5M    | WD repeat domain 35 16 (0.00)       | 139 (0.22) | 0.58 |
| 11-14 | Gp4 | g.chr8:38187062G>A   | Missense Mutation | WHSC1L1 | p.T472I  | Wolf-Hirschhorn syndrc 46 (0.00)    | 115 (0.82) | 2.18 |
| 11-14 | Gp4 | g.chr3:13860650C>G   | Missense Mutation | WNT7A   | p.D281H  | wingless-type MMTV ir 19 (0.00)     | 195 (0.31) | 0.82 |
| 11-14 | Gp4 | g.chr16:69922018C>A  | Silent            | WWP2    | p.P260P  | WW domain containing 95 (0.00)      | 373 (0.23) | 0.61 |
| 11-14 | Gp4 | g.chr3:39225796C>T   | Missense Mutation | XIRP1   | p.G1714D | xin actin-binding repeat 20 (0.00)  | 42 (0.40)  | 1.08 |
| 11-14 | Gp4 | g.chr20:30556212G>T  | Silent            | XKR7    | p.A78A   | XK, Kell blood group c 18 (0.00)    | 69 (0.64)  | 1.70 |
| 11-14 | Gp4 | g.chr3:14216796G>T   | Intron            | XPC     |          | xeroderma pigmentosun 222 (0.00)    | 431 (0.48) | 1.29 |
| 11-14 | Gp4 | g.chr17:48431848C>A  | Nonsense Mutation | XYLT2   | p.Y236*  | xylosyltransferase II 39 (0.00)     | 45 (0.16)  | 0.41 |
| 11-14 | Gp4 | g.chr7:100364752G>A  | RNA               | ZAN     |          | zonadhesin (gene/pseud 30 (0.00)    | 226 (0.67) | 2.12 |
| 11-14 | Gp4 | g.chr22:50277393A>G  | Missense Mutation | ZBED4   | p.D28G   | zinc finger, BED-type c 62 (0.02)   | 96 (0.68)  | 1.81 |
| 11-14 | Gp4 | g.chr20:56191369C>T  | Missense Mutation | ZBP1    | p.A64T   | Z-DNA binding protein 36 (0.00)     | 146 (0.77) | 2.05 |
| 11-14 | Gp4 | g.chr3:114069208C>A  | Missense Mutation | ZBTB20  | p.G500C  | zinc finger and BTB dor 23 (0.00)   | 145 (0.37) | 1.16 |
| 11-14 | Gp4 | g.chr3:114069245C>A  | Silent            | ZBTB20  | p.L487L  | zinc finger and BTB dor 18 (0.00)   | 125 (0.61) | 1.93 |
| 11-14 | Gp4 | g.chr9:129595408G>C  | Missense Mutation | ZBTB43  | p.S207T  | zinc finger and BTB dor 36 (0.00)   | 223 (0.30) | 0.81 |
| 11-14 | Gp4 | g.chr16:88694427C>A  | Missense Mutation | ZC3H18  | p.S790Y  | zinc finger CCCH-type 43 (0.00)     | 80 (0.17)  | 0.47 |
| 11-14 | Gp4 | g.chr8:144620183T>C  | Missense Mutation | ZC3H3   | p.S452G  | zinc finger CCCH-type 48 (0.00)     | 61 (0.52)  | 1.40 |

|       |     |                      |                   |            |          |                                              |            |      |
|-------|-----|----------------------|-------------------|------------|----------|----------------------------------------------|------------|------|
| 11-14 | Gp4 | g.chr19:47593368C>T  | Missense Mutation | ZC3H4      | p.G191S  | zinc finger CCCH-type 52 (0.02)              | 270 (0.23) | 0.62 |
| 11-14 | Gp4 | g.chr16:72991941C>T  | Missense Mutation | ZFHX3      | p.V702I  | zinc finger homeobox 3 47 (0.00)             | 223 (0.17) | 0.47 |
| 11-14 | Gp4 | g.chr4:2306934C>G    | Missense Mutation | ZFYVE28    | p.S378T  | zinc finger, FYVE domain 20 (0.00)           | 126 (0.14) | 0.38 |
| 11-14 | Gp4 | g.chr4:2306949G>A    | Missense Mutation | ZFYVE28    | p.P373L  | zinc finger, FYVE domain 22 (0.00)           | 128 (0.20) | 0.54 |
| 11-14 | Gp4 | g.chr10:81052035C>G  | Silent            | ZMIZ1      | p.A293A  | zinc finger, MIZ-type class 38 (0.00)        | 116 (0.16) | 0.44 |
| 11-14 | Gp4 | g.chr7:44802560G>T   | Silent            | ZMIZ2      | p.L559L  | zinc finger, MIZ-type class 28 (0.00)        | 279 (0.27) | 0.93 |
| 11-14 | Gp4 | g.chr19:44384253G>A  | Silent            | ZNF404     | p.F15F   | zinc finger protein 404 42 (0.00)            | 557 (1.00) | 2.66 |
| 11-14 | Gp4 | g.chr16:49672520A>G  | Silent            | ZNF423     | p.R181R  | zinc finger protein 423 21 (0.00)            | 116 (0.73) | 1.95 |
| 11-14 | Gp4 | g.chr19:42729094C>A  | Missense Mutation | ZNF526     | p.P180Q  | zinc finger protein 526 20 (0.00)            | 37 (0.62)  | 1.66 |
| 11-14 | Gp4 | g.chr19:42730358G>T  | Missense Mutation | ZNF526     | p.L601F  | zinc finger protein 526 57 (0.00)            | 88 (0.17)  | 0.45 |
| 11-14 | Gp4 | g.chr19:30935911C>A  | Missense Mutation | ZNF536     | p.P481Q  | zinc finger protein 536 60 (0.00)            | 289 (0.25) | 0.67 |
| 11-14 | Gp4 | g.chr16:31072478C>A  | Nonsense Mutation | ZNF668     | p.E591*  | zinc finger protein 668 39 (0.00)            | 290 (0.26) | 0.70 |
| 11-14 | Gp4 | g.chr1:151260561C>A  | Silent            | ZNF687     | p.V598V  | zinc finger protein 687 36 (0.00)            | 73 (0.75)  | 2.01 |
| 11-14 | Gp4 | g.chr7:143079727T>C  | Silent            | ZYX        | p.S150S  | zyxin 15 (0.00)                              | 40 (0.55)  | 1.75 |
| 12-01 | Gp3 | g.chr5:178208183A>T  | RNA               | AACSP1     |          | acetoacetyl-CoA synthetase 149 (0.00)        | 182 (0.19) | 0.51 |
| 12-01 | Gp3 | g.chr2:69784070C>A   | Silent            | AAK1       | p.G68G   | AP2 associated kinase 1 172 (0.00)           | 133 (0.30) | 0.80 |
| 12-01 | Gp3 | g.chr17:67004275C>A  | Silent            | ABCA9      | p.L1083L | ATP-binding cassette, subfamily 1 37 (0.00)  | 37 (0.65)  | 1.73 |
| 12-01 | Gp3 | g.chr11:119024787T>A | Missense Mutation | ABCG4      | p.L97Q   | ATP-binding cassette, subfamily 1 125 (0.00) | 25 (0.20)  | 0.53 |
| 12-01 | Gp3 | g.chr6:26597387C>A   | Silent            | ABT1       | p.P59P   | activator of basal transcription 24 (0.00)   | 38 (0.24)  | 0.63 |
| 12-01 | Gp3 | g.chr11:34192524C>A  | Missense Mutation | ABTB2      | p.G498W  | ankyrin repeat and BTB domain 164 (0.01)     | 55 (0.22)  | 0.58 |
| 12-01 | Gp3 | g.chr7:131625973G>A  | lincRNA           | AC009518.4 |          | 174 (0.00)                                   | 90 (0.17)  | 0.44 |
| 12-01 | Gp3 | g.chr12:109680301T>C | Silent            | ACACB      | p.T1694T | acetyl-CoA carboxylase 52 (0.00)             | 45 (0.27)  | 0.71 |
| 12-01 | Gp3 | g.chr14:23531672C>A  | Nonsense Mutation | ACIN1      | p.E1040* | apoptotic chromatin condensation 318 (0.00)  | 112 (0.24) | 0.64 |
| 12-01 | Gp3 | g.chr2:237489420C>A  | Silent            | ACKR3      | p.L104L  | atypical chemokine receptor 40 (0.00)        | 61 (0.16)  | 0.44 |
| 12-01 | Gp3 | g.chr10:114154707G>A | Start Codon SNP   | ACSL5      | p.MII    | acyl-CoA synthetase long chain 75 (0.00)     | 30 (0.43)  | 1.16 |
| 12-01 | Gp3 | g.chr20:33507279C>A  | Silent            | ACSS2      | p.L292L  | acyl-CoA synthetase short chain 40 (0.00)    | 30 (0.30)  | 0.80 |
| 12-01 | Gp3 | g.chr19:1507357C>A   | Missense Mutation | ADAMTSL5   | p.V246F  | ADAMTS-like 5 18 (0.00)                      | 37 (0.16)  | 0.43 |
| 12-01 | Gp3 | g.chr5:7709333C>T    | Missense Mutation | ADCY2      | p.R471W  | adenylate cyclase 2 (brain) 118 (0.00)       | 33 (0.15)  | 0.40 |
| 12-01 | Gp3 | g.chr4:88047331C>A   | Missense Mutation | AFF1       | p.A878D  | AF4/FMR2 family, member 149 (0.00)           | 85 (0.21)  | 0.56 |
| 12-01 | Gp3 | g.chr3:186338393C>A  | Missense Mutation | AHSG       | p.Q261K  | alpha-2-HS-glycoprotein 106 (0.00)           | 111 (0.25) | 0.67 |
| 12-01 | Gp3 | g.chr6:151672044G>T  | Missense Mutation | AKAP12     | p.D840Y  | A kinase (PRKA) anchor 55 (0.00)             | 22 (0.23)  | 0.61 |
| 12-01 | Gp3 | g.chr7:91732060G>A   | Silent            | AKAP9      | p.T3750T | A kinase (PRKA) anchor 46 (0.00)             | 15 (0.33)  | 0.89 |
| 12-01 | Gp3 | g.chr22:50302947G>A  | Missense Mutation | ALG12      | p.P238L  | ALG12, alpha-1,6-mannosidase 24 (0.00)       | 63 (0.13)  | 0.42 |
| 12-01 | Gp3 | g.chr2:73676031G>A   | Missense Mutation | ALMS1      | p.V792I  | Alstrom syndrome 1 153 (0.00)                | 38 (0.76)  | 2.04 |
| 12-01 | Gp3 | g.chr15:85399786G>C  | Missense Mutation | ALPK3      | p.S808T  | alpha-kinase 3 32 (0.00)                     | 11 (0.55)  | 1.45 |

|       |     |                      |                   |          |          |                                    |            |            |      |
|-------|-----|----------------------|-------------------|----------|----------|------------------------------------|------------|------------|------|
| 12-01 | Gp3 | g.chr3:134078321G>C  | Missense Mutation | AMOTL2   | p.I694M  | angiomin like 2                    | 23 (0.00)  | 29 (0.17)  | 0.46 |
| 12-01 | Gp3 | g.chr1:104162289C>T  | Silent            | AMY2A    | p.F209F  | amylase, alpha 2A (panc            | 108 (0.00) | 31 (0.48)  | 1.29 |
| 12-01 | Gp3 | g.chr12:121783726G>T | Missense Mutation | ANAPC5   | p.T169K  | anaphase promoting con             | 70 (0.00)  | 18 (0.39)  | 1.04 |
| 12-01 | Gp3 | g.chr4:73990681T>A   | Missense Mutation | ANKRD17  | p.E1147D | ankyrin repeat domain 1            | 133 (0.00) | 54 (0.39)  | 1.04 |
| 12-01 | Gp3 | g.chr9:95649232C>T   | RNA               | ANKRD19P |          | ankyrin repeat domain 1            | 277 (0.00) | 61 (0.41)  | 1.09 |
| 12-01 | Gp3 | g.chr19:33117728C>G  | Missense Mutation | ANKRD27  | p.A476P  | ankyrin repeat domain 2            | 59 (0.00)  | 51 (0.24)  | 0.63 |
| 12-01 | Gp3 | g.chr18:12125849C>T  | Silent            | ANKRD62  | p.L677L  | ankyrin repeat domain 6            | 88 (0.00)  | 15 (0.33)  | 0.89 |
| 12-01 | Gp3 | g.chr7:4823046G>C    | Missense Mutation | AP5Z1    | p.V156L  | adaptor-related protein c          | 19 (0.00)  | 42 (0.14)  | 0.38 |
| 12-01 | Gp3 | g.chr22:36661639G>A  | Missense Mutation | APOL1    | p.E253K  | apolipoprotein L, 1                | 152 (0.01) | 33 (0.21)  | 0.57 |
| 12-01 | Gp3 | g.chr22:36662016G>T  | Silent            | APOL1    | p.L378L  | apolipoprotein L, 1                | 96 (0.00)  | 34 (0.29)  | 0.78 |
| 12-01 | Gp3 | g.chr22:36587797C>T  | Missense Mutation | APOL4    | p.C124Y  | apolipoprotein L, 4                | 113 (0.00) | 19 (0.26)  | 0.70 |
| 12-01 | Gp3 | g.chr9:33395109G>T   | Missense Mutation | AQP7     | p.F37L   | aquaporin 7                        | 84 (0.00)  | 35 (0.17)  | 0.46 |
| 12-01 | Gp3 | g.chr11:72424286C>G  | Missense Mutation | ARAP1    | p.D228H  | ArfGAP with RhoGAP                 | 19 (0.00)  | 30 (0.20)  | 0.53 |
| 12-01 | Gp3 | g.chr19:47423471C>A  | Missense Mutation | ARHGAP35 | p.S513R  | Rho GTPase activating j            | 185 (0.00) | 29 (0.17)  | 0.46 |
| 12-01 | Gp3 | g.chr19:42398600G>C  | Missense Mutation | ARHGEF1  | p.W289S  | Rho guanine nucleotide 2           | 5 (0.00)   | 33 (0.15)  | 0.40 |
| 12-01 | Gp3 | g.chr8:1814720G>T    | Missense Mutation | ARHGEF10 | p.A192S  | Rho guanine nucleotide 9           | 3 (0.00)   | 153 (0.12) | 0.40 |
| 12-01 | Gp3 | g.chr8:1851503C>G    | Silent            | ARHGEF10 | p.A569A  | Rho guanine nucleotide 1           | 67 (0.00)  | 38 (0.26)  | 0.89 |
| 12-01 | Gp3 | g.chr6:157405805G>T  | Missense Mutation | ARID1B   | p.G683C  | AT rich interactive dom            | 89 (0.00)  | 24 (0.33)  | 0.89 |
| 12-01 | Gp3 | g.chrX:101857520G>A  | Missense Mutation | ARMCX5   | p.D151N  | armadillo repeat contain           | 68 (0.00)  | 11 (0.73)  | 1.21 |
| 12-01 | Gp3 | g.chr12:27521205G>A  | Silent            | ARNTL2   | p.L25L   | aryl hydrocarbon recept            | 25 (0.00)  | 22 (0.32)  | 0.85 |
| 12-01 | Gp3 | g.chr1:23769064C>A   | Missense Mutation | ASAP3    | p.G172V  | ArfGAP with SH3 dom                | 72 (0.00)  | 41 (0.15)  | 0.39 |
| 12-01 | Gp3 | g.chr6:100957933G>A  | Silent            | ASCC3    | p.D2112D | activating signal cointeg          | 98 (0.00)  | 60 (0.18)  | 0.49 |
| 12-01 | Gp3 | g.chr1:197070968C>T  | Silent            | ASPM     | p.L2471L | asp (abnormal spindle) l           | 34 (0.00)  | 39 (0.33)  | 0.89 |
| 12-01 | Gp3 | g.chr2:70188620C>A   | Silent            | ASPRV1   | p.G67G   | aspartic peptidase, retro          | 28 (0.00)  | 37 (0.16)  | 0.43 |
| 12-01 | Gp3 | g.chr22:39918599G>A  | Missense Mutation | ATF4     | p.V350I  | activating transcription           | 171 (0.00) | 40 (0.28)  | 0.73 |
| 12-01 | Gp3 | g.chr14:96761368C>T  | Silent            | ATG2B    | p.V1785V | autophagy related 2B               | 169 (0.00) | 44 (0.20)  | 0.55 |
| 12-01 | Gp3 | g.chr15:25925348G>A  | Silent            | ATP10A   | p.Y1262Y | ATPase, class V, type 1            | 47 (0.00)  | 107 (0.13) | 0.44 |
| 12-01 | Gp3 | g.chr5:160097616G>T  | Missense Mutation | ATP10B   | p.Q177K  | ATPase, class V, type 1            | 140 (0.00) | 29 (0.21)  | 0.55 |
| 12-01 | Gp3 | g.chr13:113505450G>A | Missense Mutation | ATP11A   | p.D637N  | ATPase, class VI, type 1           | 145 (0.00) | 102 (0.12) | 0.38 |
| 12-01 | Gp3 | g.chr1:17322651C>G   | Silent            | ATP13A2  | p.L454L  | ATPase type 13A2                   | 61 (0.00)  | 100 (0.20) | 0.53 |
| 12-01 | Gp3 | g.chr12:90028882G>A  | Nonsense Mutation | ATP2B1   | p.Q185*  | ATPase, Ca <sup>++</sup> transport | 51 (0.02)  | 24 (0.21)  | 0.56 |
| 12-01 | Gp3 | g.chr7:97949382C>G   | Silent            | BAIAP2L1 | p.V112V  | BAI1-associated protein            | 134 (0.00) | 111 (0.20) | 0.53 |
| 12-01 | Gp3 | g.chr7:72892611G>A   | Missense Mutation | BAZ1B    | p.P394S  | bromodomain adjacent t             | 45 (0.00)  | 12 (0.83)  | 2.22 |
| 12-01 | Gp3 | g.chr4:42145676G>A   | Missense Mutation | BEND4    | p.H275Y  | BEN domain containing              | 57 (0.00)  | 13 (0.54)  | 1.44 |
| 12-01 | Gp3 | g.chrX:102564541C>A  | Missense Mutation | BEX2     | p.D122Y  | brain expressed X-linke            | 49 (0.00)  | 29 (0.62)  | 1.03 |

|       |     |                      |                   |          |          |                           |             |            |      |
|-------|-----|----------------------|-------------------|----------|----------|---------------------------|-------------|------------|------|
| 12-01 | Gp3 | g.chr12:51685998C>T  | Missense Mutation | BIN2     | p.D298N  | bridging integrator 2     | 163 (0.00)  | 55 (0.15)  | 0.39 |
| 12-01 | Gp3 | g.chr6:3127631G>A    | Missense Mutation | BPHL     | p.D106N  | biphenyl hydrolase-like   | 59 (0.00)   | 20 (0.30)  | 0.80 |
| 12-01 | Gp3 | g.chr20:31767473G>A  | Splice Site       | BPIFA2   | p.D237N  | BPI fold containing fam   | 99 (0.00)   | 44 (0.16)  | 0.42 |
| 12-01 | Gp3 | g.chr17:65850149T>A  | Nonsense Mutation | BPTF     | p.L236*  | bromodomain PHD fing      | 144 (0.01)  | 128 (0.41) | 1.10 |
| 12-01 | Gp3 | g.chr13:32907863C>T  | Intron            | BRCA2    |          | breast cancer 2, early on | 76 (0.00)   | 49 (0.14)  | 0.38 |
| 12-01 | Gp3 | g.chr1:55464905C>T   | Missense Mutation | BSND     | p.L16F   | barttin CLCNK-type chl    | 31 (0.00)   | 30 (0.17)  | 0.44 |
| 12-01 | Gp3 | g.chr15:74032542C>A  | Missense Mutation | C15orf59 | p.D200Y  | chromosome 15 open re     | 32 (0.00)   | 48 (0.15)  | 0.39 |
| 12-01 | Gp3 | g.chr19:14193358C>T  | Silent            | C19orf67 | p.S275S  | chromosome 19 open re     | 63 (0.00)   | 54 (0.24)  | 0.64 |
| 12-01 | Gp3 | g.chr1:244715787C>A  | Missense Mutation | C1orf101 | p.P234T  | chromosome 1 open rea     | 30 (0.00)   | 41 (0.22)  | 0.59 |
| 12-01 | Gp3 | g.chr1:223568584C>A  | Silent            | C1orf65  | p.L589L  |                           | 140 (0.00)  | 111 (0.15) | 0.41 |
| 12-01 | Gp3 | g.chr1:22986089C>A   | Missense Mutation | C1QB     | p.P45H   | complement component      | 26 (0.00)   | 43 (0.30)  | 0.81 |
| 12-01 | Gp3 | g.chr3:112732805A>C  | Silent            | C3orf17  | p.S112S  | chromosome 3 open rea     | 88 (0.00)   | 47 (0.15)  | 0.40 |
| 12-01 | Gp3 | g.chr6:165713887G>A  | Missense Mutation | C6orf118 | p.S281F  | chromosome 6 open rea     | 129 (0.01)  | 42 (0.36)  | 0.95 |
| 12-01 | Gp3 | g.chr9:100672565C>A  | Missense Mutation | C9orf156 | p.R248M  | chromosome 9 open rea     | 268 (0.00)  | 45 (0.18)  | 0.47 |
| 12-01 | Gp3 | g.chr9:100672574G>A  | Missense Mutation | C9orf156 | p.P245L  | chromosome 9 open rea     | 222 (0.00)  | 37 (0.22)  | 0.58 |
| 12-01 | Gp3 | g.chr13:49906199G>A  | Missense Mutation | CAB39L   | p.H240Y  | calcium binding protein   | 105 (0.01)  | 29 (0.21)  | 0.55 |
| 12-01 | Gp3 | g.chr12:2690949C>G   | Missense Mutation | CACNA1C  | p.L697V  | calcium channel, voltag   | 132 (0.00)  | 35 (0.29)  | 0.76 |
| 12-01 | Gp3 | g.chr3:85069393G>T   | Intron            | CADM2    |          | cell adhesion molecule    | 218 (0.00)  | 12 (0.42)  | 1.11 |
| 12-01 | Gp3 | g.chr3:85225383T>C   | Intron            | CADM2    |          | cell adhesion molecule    | 2176 (0.00) | 99 (0.14)  | 0.38 |
| 12-01 | Gp3 | g.chr3:85369591G>A   | Intron            | CADM2    |          | cell adhesion molecule    | 236 (0.00)  | 19 (0.26)  | 0.70 |
| 12-01 | Gp3 | g.chr3:85463289A>T   | Intron            | CADM2    |          | cell adhesion molecule    | 256 (0.00)  | 17 (0.41)  | 1.10 |
| 12-01 | Gp3 | g.chr14:90867621C>G  | Missense Mutation | CALM1    | p.S19C   | calmodulin 1 (phosphor    | 90 (0.00)   | 20 (0.30)  | 0.80 |
| 12-01 | Gp3 | g.chr1:7811317G>A    | Missense Mutation | CAMTA1   | p.S1583N | calmodulin binding tran   | 281 (0.00)  | 110 (0.15) | 0.39 |
| 12-01 | Gp3 | g.chr19:48737660C>T  | Splice Site       | CARD8    | p.S117N  | caspase recruitment don   | 43 (0.00)   | 28 (0.61)  | 1.62 |
| 12-01 | Gp3 | g.chr15:43928376G>A  | Missense Mutation | CATSPER2 | p.T295I  | cation channel, sperm a   | 133 (0.00)  | 29 (0.17)  | 0.46 |
| 12-01 | Gp3 | g.chr19:14041075C>A  | Silent            | CC2D1A   | p.L936L  | coiled-coil and C2 dom    | 67 (0.00)   | 132 (0.14) | 0.38 |
| 12-01 | Gp3 | g.chr13:103383002C>T | Missense Mutation | CCDC168  | p.S2053N | coiled-coil domain cont   | 59 (0.00)   | 21 (0.67)  | 1.78 |
| 12-01 | Gp3 | g.chr12:102433670G>T | Silent            | CCDC53   | p.A137A  | coiled-coil domain cont   | 37 (0.00)   | 49 (0.18)  | 0.49 |
| 12-01 | Gp3 | g.chr13:37007270C>G  | Missense Mutation | CCNA1    | p.T70S   | cyclin A1                 | 76 (0.00)   | 34 (0.15)  | 0.39 |
| 12-01 | Gp3 | g.chr6:41905075G>A   | Missense Mutation | CCND3    | p.H158Y  | cyclin D3                 | 59 (0.00)   | 23 (0.43)  | 1.16 |
| 12-01 | Gp3 | g.chr5:159686680G>T  | Missense Mutation | CCNJL    | p.L127M  | cyclin J-like             | 88 (0.01)   | 115 (0.16) | 0.42 |
| 12-01 | Gp3 | g.chr1:1333999G>T    | Missense Mutation | CCNL2    | p.S114Y  | cyclin L2                 | 70 (0.00)   | 44 (0.30)  | 0.79 |
| 12-01 | Gp3 | g.chr7:5949671G>A    | Missense Mutation | CCZ1     | p.G235E  | CCZ1 vacuolar protein     | 138 (0.00)  | 29 (0.21)  | 0.55 |
| 12-01 | Gp3 | g.chr1:111437592A>T  | Missense Mutation | CD53     | p.Y113F  | CD53 molecule             | 36 (0.00)   | 29 (0.17)  | 0.46 |
| 12-01 | Gp3 | g.chr5:149782185G>A  | Missense Mutation | CD74     | p.S274L  | CD74 molecule, major      | 142 (0.00)  | 35 (0.17)  | 0.46 |



|       |     |                      |                   |          |          |                           |               |            |      |
|-------|-----|----------------------|-------------------|----------|----------|---------------------------|---------------|------------|------|
| 12-01 | Gp3 | g.chr5:149782189C>A  | Splice Site       | CD74     |          | CD74 molecule, major l    | 27 (0.00)     | 29 (0.28)  | 0.74 |
| 12-01 | Gp3 | g.chr13:49823078G>A  | Missense Mutation | CDADC1   | p.E52K   | cytidine and dCMP dea     | 48 (0.00)     | 24 (0.29)  | 0.78 |
| 12-01 | Gp3 | g.chr10:73377012G>A  | Silent            | CDH23    | p.T337T  | cadherin-related 23       | 164 (0.00)    | 55 (0.15)  | 0.39 |
| 12-01 | Gp3 | g.chr10:73556927T>A  | Missense Mutation | CDH23    | p.V2265E | cadherin-related 23       | 67 (0.00)     | 28 (0.32)  | 0.86 |
| 12-01 | Gp3 | g.chr6:4943871C>A    | Missense Mutation | CDYL     | p.L405I  | chromodomain protein,     | 145 (0.00)    | 34 (0.26)  | 0.71 |
| 12-01 | Gp3 | g.chr22:17662410C>T  | Missense Mutation | CECR1    | p.R500K  | cat eye syndrome chrom    | 351 (0.00)    | 162 (0.19) | 0.49 |
| 12-01 | Gp3 | g.chr20:3765602G>A   | Missense Mutation | CENPB    | p.S510F  | centromere protein B,     | 8(20 (0.00)   | 12 (0.42)  | 0.49 |
| 12-01 | Gp3 | g.chr4:119459182G>A  | RNA               | CEP170P1 |          | centrosomal protein       | 170208 (0.00) | 55 (0.95)  | 2.52 |
| 12-01 | Gp3 | g.chr1:180022984C>A  | Missense Mutation | CEP350   | p.H1697N | centrosomal protein       | 35073 (0.00)  | 45 (0.53)  | 1.42 |
| 12-01 | Gp3 | g.chr19:33417172A>T  | Missense Mutation | CEP89    | p.I363K  | centrosomal protein       | 89k16 (0.00)  | 29 (0.21)  | 0.55 |
| 12-01 | Gp3 | g.chr3:101446313C>G  | Missense Mutation | CEP97    | p.S91R   | centrosomal protein       | 97k89 (0.00)  | 143 (0.33) | 0.88 |
| 12-01 | Gp3 | g.chr22:47116908G>T  | Silent            | CERK     | p.A49A   | ceramide kinase           | 149 (0.00)    | 68 (0.12)  | 0.39 |
| 12-01 | Gp3 | g.chr16:67000658G>T  | Missense Mutation | CES3     | p.G318C  | carboxylesterase 3        | 219 (0.00)    | 117 (0.15) | 0.39 |
| 12-01 | Gp3 | g.chr17:7806761C>T   | Nonsense Mutation | CHD3     | p.Q1282* | chromodomain helicase     | 39 (0.00)     | 22 (0.23)  | 0.61 |
| 12-01 | Gp3 | g.chr12:6704596C>A   | Splice Site       | CHD4     | p.R672S  | chromodomain helicase     | 152 (0.00)    | 29 (0.21)  | 0.55 |
| 12-01 | Gp3 | g.chr1:6183217G>C    | Intron            | CHD5     |          | chromodomain helicase     | 79 (0.00)     | 84 (0.15)  | 0.41 |
| 12-01 | Gp3 | g.chr20:40113205G>T  | Silent            | CHD6     | p.R682R  | chromodomain helicase     | 85 (0.00)     | 26 (0.19)  | 0.51 |
| 12-01 | Gp3 | g.chr19:34263935C>T  | Silent            | CHST8    | p.F414F  | carbohydrate (N-acetyl    | g17 (0.00)    | 36 (0.17)  | 0.44 |
| 12-01 | Gp3 | g.chr19:42798111C>G  | Missense Mutation | CIC      | p.F2261L | capicua transcriptional   | r65 (0.00)    | 118 (0.16) | 0.43 |
| 12-01 | Gp3 | g.chr11:46765573T>A  | Nonstop Mutation  | CKAP5    | p.*2033C | cytoskeleton associated   | 26 (0.00)     | 22 (0.59)  | 1.58 |
| 12-01 | Gp3 | g.chr2:122286336T>C  | Missense Mutation | CLASP1   | p.R99G   | cytoplasmic linker assoc  | 82 (0.00)     | 32 (0.16)  | 0.42 |
| 12-01 | Gp3 | g.chr17:6978698C>G   | Missense Mutation | CLEC10A  | p.D231H  | C-type lectin domain fa   | r99 (0.00)    | 41 (0.29)  | 0.78 |
| 12-01 | Gp3 | g.chr1:9795634C>A    | Nonsense Mutation | CLSTN1   | p.G592*  | calsyntenin 1             | 59 (0.00)     | 40 (0.15)  | 0.40 |
| 12-01 | Gp3 | g.chr22:19171099G>A  | Missense Mutation | CLTCL1   | p.S1544L | clathrin, heavy chain-lik | 21 (0.00)     | 42 (0.21)  | 0.57 |
| 12-01 | Gp3 | g.chr22:19209500C>A  | Missense Mutation | CLTCL1   | p.L845F  | clathrin, heavy chain-lik | 166 (0.00)    | 28 (0.39)  | 1.05 |
| 12-01 | Gp3 | g.chr8:87738765G>A   | Missense Mutation | CNGB3    | p.P111L  | cyclic nucleotide gated   | 186 (0.00)    | 25 (0.40)  | 1.07 |
| 12-01 | Gp3 | g.chr9:116958249G>T  | Missense Mutation | COL27A1  | p.G694V  | collagen, type XXVII, a   | 71 (0.00)     | 47 (0.15)  | 0.40 |
| 12-01 | Gp3 | g.chr21:47409035G>A  | Missense Mutation | COL6A1   | p.G281E  | collagen, type VI, alpha  | 78 (0.00)     | 119 (0.12) | 0.43 |
| 12-01 | Gp3 | g.chr8:87567195C>T   | Nonsense Mutation | CPNE3    | p.Q413*  | copine III                | 90 (0.00)     | 48 (0.38)  | 1.00 |
| 12-01 | Gp3 | g.chr1:153941837C>A  | Missense Mutation | CREB3L4  | p.P150H  | cAMP responsive eleme     | 130 (0.00)    | 47 (0.51)  | 1.36 |
| 12-01 | Gp3 | g.chr8:75928863C>A   | Nonsense Mutation | CRISPLD1 | p.S264*  | cysteine-rich secretory   | p75 (0.01)    | 25 (0.40)  | 1.07 |
| 12-01 | Gp3 | g.chr8:75928865C>A   | Missense Mutation | CRISPLD1 | p.Q265K  | cysteine-rich secretory   | p75 (0.01)    | 24 (0.42)  | 1.11 |
| 12-01 | Gp3 | g.chr17:29123236G>T  | Missense Mutation | CRLF3    | p.P182Q  | cytokine receptor-like    | f252 (0.00)   | 36 (0.17)  | 0.44 |
| 12-01 | Gp3 | g.chr12:107391359G>A | Missense Mutation | CRY1     | p.P467S  | cryptochrome circadian    | 35 (0.00)     | 25 (0.36)  | 0.96 |
| 12-01 | Gp3 | g.chr8:4851897G>A    | Silent            | CSMD1    | p.L14L   | CUB and Sushi multiple    | 29 (0.00)     | 42 (0.14)  | 0.38 |

|       |     |                      |                   |              |          |                                                    |            |      |
|-------|-----|----------------------|-------------------|--------------|----------|----------------------------------------------------|------------|------|
| 12-01 | Gp3 | g.chr15:75980795C>A  | Missense Mutation | CSPG4        | p.D871Y  | chondroitin sulfate proteoglycan 103 (0.00)        | 109 (0.17) | 0.44 |
| 12-01 | Gp3 | g.chr12:51467623G>T  | Missense Mutation | CSRNP2       | p.H132N  | cysteine-serine-rich nucleosome 118 (0.00)         | 37 (0.49)  | 1.30 |
| 12-01 | Gp3 | g.chr19:20370054C>T  | RNA               | CTC-260E6.6  |          | 120 (0.00)                                         | 70 (0.17)  | 0.46 |
| 12-01 | Gp3 | g.chr11:66278531C>A  | Missense Mutation | CTD-307407.1 | p.A69D   | 69 (0.00)                                          | 34 (0.15)  | 0.39 |
| 12-01 | Gp3 | g.chr11:57576006T>C  | Silent            | CTNND1       | p.L740L  | catenin (cadherin-associated protein) 1 248 (0.00) | 116 (0.19) | 0.51 |
| 12-01 | Gp3 | g.chr6:43190092C>T   | Silent            | CUL9         | p.D2267D | cullin 9 72 (0.00)                                 | 63 (0.29)  | 0.76 |
| 12-01 | Gp3 | g.chr18:47812995C>A  | Missense Mutation | CXXC1        | p.C46F   | CXXC finger protein 1 71 (0.00)                    | 77 (0.17)  | 0.45 |
| 12-01 | Gp3 | g.chr5:139622891G>A  | Splice Site       | CYSTM1       | p.V63V   | cysteine-rich transmembrane protein 34 (0.00)      | 15 (0.40)  | 1.07 |
| 12-01 | Gp3 | g.chr9:124336763A>G  | Intron            | DAB2IP       |          | DAB2 interacting protein 146 (0.00)                | 139 (0.19) | 0.50 |
| 12-01 | Gp3 | g.chr9:124341980C>A  | Intron            | DAB2IP       |          | DAB2 interacting protein 236 (0.00)                | 154 (0.19) | 0.52 |
| 12-01 | Gp3 | g.chr9:124362740C>G  | Intron            | DAB2IP       |          | DAB2 interacting protein 149 (0.00)                | 134 (0.23) | 0.62 |
| 12-01 | Gp3 | g.chr9:124395596T>A  | Intron            | DAB2IP       |          | DAB2 interacting protein 226 (0.00)                | 32 (0.34)  | 0.92 |
| 12-01 | Gp3 | g.chr9:124442964C>T  | Intron            | DAB2IP       |          | DAB2 interacting protein 47 (0.00)                 | 73 (0.23)  | 0.62 |
| 12-01 | Gp3 | g.chr9:124450272C>G  | Intron            | DAB2IP       |          | DAB2 interacting protein 87 (0.00)                 | 28 (0.32)  | 0.86 |
| 12-01 | Gp3 | g.chr9:124479240C>A  | Intron            | DAB2IP       |          | DAB2 interacting protein 183 (0.00)                | 41 (0.24)  | 0.65 |
| 12-01 | Gp3 | g.chr14:59112231G>A  | Missense Mutation | DACT1        | p.R260K  | dishevelled-binding antigen 151 (0.00)             | 73 (0.16)  | 0.44 |
| 12-01 | Gp3 | g.chr1:155707979G>T  | Silent            | DAP3         | p.L381L  | death associated protein 57 (0.00)                 | 15 (0.33)  | 0.89 |
| 12-01 | Gp3 | g.chr4:155256100C>G  | Missense Mutation | DCHS2        | p.R379T  | dachsous cadherin-related protein 98 (0.00)        | 21 (0.29)  | 0.76 |
| 12-01 | Gp3 | g.chr12:57926417C>T  | Missense Mutation | DCTN2        | p.G288R  | dynactin 2 (p50) 174 (0.00)                        | 45 (0.16)  | 0.41 |
| 12-01 | Gp3 | g.chr12:57926425C>G  | Splice Site       | DCTN2        | p.S285T  | dynactin 2 (p50) 168 (0.00)                        | 44 (0.23)  | 0.61 |
| 12-01 | Gp3 | g.chr1:85817243G>T   | Silent            | DDAH1        | p.G141G  | dimethylarginine dimethylaminohydrolase 34 (0.00)  | 11 (0.45)  | 1.21 |
| 12-01 | Gp3 | g.chr11:125791238G>A | Missense Mutation | DDX25        | p.E452K  | DEAD (Asp-Glu-Ala-A) 223 (0.00)                    | 47 (0.19)  | 0.51 |
| 12-01 | Gp3 | g.chrX:41206962G>A   | Nonsense Mutation | DDX3X        | p.W660*  | DEAD (Asp-Glu-Ala-A) 86 (0.00)                     | 24 (0.38)  | 0.62 |
| 12-01 | Gp3 | g.chr5:134147010G>A  | Missense Mutation | DDX46        | p.E750K  | DEAD (Asp-Glu-Ala-A) 15 (0.00)                     | 13 (0.62)  | 1.64 |
| 12-01 | Gp3 | g.chr12:12974945C>T  | Silent            | DDX47        | p.F163F  | DEAD (Asp-Glu-Ala-A) 45 (0.00)                     | 26 (0.31)  | 0.38 |
| 12-01 | Gp3 | g.chr12:113618843C>A | Silent            | DDX54        | p.L65L   | DEAD (Asp-Glu-Ala-A) 42 (0.00)                     | 45 (0.16)  | 0.41 |
| 12-01 | Gp3 | g.chr11:33053022G>A  | Missense Mutation | DEPDC7       | p.R294Q  | DEP domain containing protein 74 (0.00)            | 34 (0.15)  | 0.39 |
| 12-01 | Gp3 | g.chr10:12162191G>C  | Missense Mutation | DHTKD1       | p.W861C  | dehydrogenase E1 and transaminase 31 (0.00)        | 76 (0.16)  | 0.42 |
| 12-01 | Gp3 | g.chr5:54579076G>A   | Silent            | DHX29        | p.N640N  | DEAH (Asp-Glu-Ala-H) 32 (0.00)                     | 12 (0.75)  | 2.00 |
| 12-01 | Gp3 | g.chr12:125461922C>A | Missense Mutation | DHX37        | p.V72L   | DEAH (Asp-Glu-Ala-H) 228 (0.00)                    | 210 (0.23) | 0.61 |
| 12-01 | Gp3 | g.chr13:60453513G>T  | Missense Mutation | DIAPH3       | p.D819E  | diaphanous-related form 57 (0.00)                  | 31 (0.52)  | 1.38 |
| 12-01 | Gp3 | g.chr13:60453525G>C  | Missense Mutation | DIAPH3       | p.N815K  | diaphanous-related form 53 (0.00)                  | 29 (0.45)  | 1.20 |
| 12-01 | Gp3 | g.chr14:95556924C>T  | Missense Mutation | DICER1       | p.G1894S | dicer 1, ribonuclease type I 49 (0.00)             | 27 (0.67)  | 1.78 |
| 12-01 | Gp3 | g.chr20:61526210C>T  | Silent            | DIDO1        | p.Q796Q  | death inducer-obliterator 25 (0.00)                | 18 (0.39)  | 1.04 |
| 12-01 | Gp3 | g.chr21:47918523C>G  | Silent            | DIP2A        | p.G144G  | DIP2 disco-interacting protein 48 (0.00)           | 26 (0.19)  | 0.70 |

|       |     |                      |                   |           |          |                            |            |            |      |
|-------|-----|----------------------|-------------------|-----------|----------|----------------------------|------------|------------|------|
| 12-01 | Gp3 | g.chr21:47931487C>A  | Silent            | DIP2A     | p.A350A  | DIP2 disco-interacting p   | 94 (0.00)  | 74 (0.22)  | 0.78 |
| 12-01 | Gp3 | g.chr12:51127927G>T  | Missense Mutation | DIP2B     | p.G1331W | DIP2 disco-interacting p   | 47 (0.00)  | 12 (0.42)  | 1.11 |
| 12-01 | Gp3 | g.chr15:51829823C>T  | Silent            | DMXL2     | p.R493R  | Dmx-like 2                 | 64 (0.00)  | 23 (0.39)  | 1.04 |
| 12-01 | Gp3 | g.chr12:124418676C>G | Missense Mutation | DNAH100S  | p.S152T  | dynein, axonemal, heav     | 35 (0.00)  | 29 (0.21)  | 0.55 |
| 12-01 | Gp3 | g.chr16:20963773C>G  | Missense Mutation | DNAH3     | p.A3724P | dynein, axonemal, heav     | 108 (0.00) | 22 (0.23)  | 0.39 |
| 12-01 | Gp3 | g.chr9:33026932T>C   | Missense Mutation | DNAJA1    | p.M85T   | DnaJ (Hsp40) homolog,      | 198 (0.00) | 51 (0.27)  | 0.73 |
| 12-01 | Gp3 | g.chr15:100339976C>A | RNA               | DNM1P46   |          | DNM1 pseudogene 46         | 22 (0.00)  | 44 (0.23)  | 0.61 |
| 12-01 | Gp3 | g.chr21:45674513G>C  | Missense Mutation | DNMT3L    | p.T227R  | DNA (cytosine-5-)-metl     | 67 (0.00)  | 64 (0.16)  | 0.56 |
| 12-01 | Gp3 | g.chr17:1939270G>A   | Silent            | DPH1      | p.T100T  | diphthamide biosynthesi    | 22 (0.00)  | 73 (0.15)  | 0.40 |
| 12-01 | Gp3 | g.chr1:168698307C>T  | Missense Mutation | DPT       | p.D36N   | dermatopontin              | 90 (0.00)  | 11 (0.55)  | 1.45 |
| 12-01 | Gp3 | g.chr1:97771741G>T   | Missense Mutation | DPYD      | p.A724E  | dihydropyrimidine dehy     | 80 (0.00)  | 23 (0.26)  | 0.70 |
| 12-01 | Gp3 | g.chr11:113281583C>G | Missense Mutation | DRD2      | p.D400H  | dopamine receptor D2       | 60 (0.00)  | 50 (0.24)  | 0.64 |
| 12-01 | Gp3 | g.chr4:9784579G>T    | Missense Mutation | DRD5      | p.W309L  | dopamine receptor D5       | 76 (0.00)  | 104 (0.14) | 0.38 |
| 12-01 | Gp3 | g.chr2:25376592C>G   | Silent            | EFR3B     | p.L770L  | EFR3 homolog B (S. ce      | 26 (0.00)  | 20 (0.25)  | 0.67 |
| 12-01 | Gp3 | g.chr14:75470326C>G  | Missense Mutation | EIF2B2    | p.N119K  | eukaryotic translation in  | 36 (0.00)  | 22 (0.32)  | 0.85 |
| 12-01 | Gp3 | g.chr22:31864207C>T  | Silent            | EIF4ENIF1 | p.K84K   | eukaryotic translation in  | 78 (0.00)  | 34 (0.26)  | 0.71 |
| 12-01 | Gp3 | g.chr11:34527213G>T  | Missense Mutation | ELF5      | p.S28R   | E74-like factor 5 (ets do  | 41 (0.00)  | 48 (0.17)  | 0.44 |
| 12-01 | Gp3 | g.chr18:2890818G>T   | Missense Mutation | EMILIN2   | p.Q231H  | elastin microfibril interf | 44 (0.00)  | 10 (0.50)  | 1.33 |
| 12-01 | Gp3 | g.chr20:39993761G>A  | Silent            | EMILIN3   | p.T68T   | elastin microfibril interf | 20 (0.00)  | 26 (0.23)  | 0.62 |
| 12-01 | Gp3 | g.chr18:43505724T>A  | Missense Mutation | EPG5      | p.N900Y  | ectopic P-granules auto    | 24 (0.00)  | 28 (0.79)  | 2.10 |
| 12-01 | Gp3 | g.chr3:96706696G>A   | Missense Mutation | EPHA6     | p.E325K  | EPH receptor A6            | 134 (0.00) | 171 (0.27) | 0.73 |
| 12-01 | Gp3 | g.chr7:142561841G>C  | Missense Mutation | EPHB6     | p.V95L   | EPH receptor B6            | 18 (0.00)  | 27 (0.30)  | 0.79 |
| 12-01 | Gp3 | g.chr1:110295773G>T  | Nonsense Mutation | EPS8L3    | p.S390*  | EPS8-like 3                | 50 (0.00)  | 13 (0.46)  | 1.23 |
| 12-01 | Gp3 | g.chr17:56281674G>A  | Missense Mutation | EPX       | p.G680S  | eosinophil peroxidase      | 42 (0.00)  | 13 (0.38)  | 1.03 |
| 12-01 | Gp3 | g.chr17:27183528C>T  | Silent            | ERAL1     | p.F139F  | Era-like 12S mitochond     | 77 (0.00)  | 20 (0.30)  | 0.80 |
| 12-01 | Gp3 | g.chr21:39798127C>A  | Intron            | ERG       |          | v-ets avian erythroblast   | 71 (0.00)  | 45 (0.49)  | 1.30 |
| 12-01 | Gp3 | g.chr21:39834529C>G  | Intron            | ERG       |          | v-ets avian erythroblast   | 43 (0.00)  | 12 (0.50)  | 1.33 |
| 12-01 | Gp3 | g.chr21:39842686C>T  | Intron            | ERG       |          | v-ets avian erythroblast   | 42 (0.00)  | 25 (0.36)  | 0.96 |
| 12-01 | Gp3 | g.chr21:39904646G>C  | Intron            | ERG       |          | v-ets avian erythroblast   | 71 (0.00)  | 33 (0.21)  | 0.57 |
| 12-01 | Gp3 | g.chr21:39940521A>T  | Intron            | ERG       |          | v-ets avian erythroblast   | 324 (0.00) | 124 (0.16) | 0.43 |
| 12-01 | Gp3 | g.chr21:39966483G>A  | Intron            | ERG       |          | v-ets avian erythroblast   | 132 (0.00) | 11 (0.45)  | 1.21 |
| 12-01 | Gp3 | g.chr16:23711896G>T  | Missense Mutation | ERN2      | p.P445T  | endoplasmic reticulum t    | 76 (0.00)  | 73 (0.15)  | 0.40 |
| 12-01 | Gp3 | g.chr12:112460064T>C | Missense Mutation | ERP29     | p.Y31H   | endoplasmic reticulum p    | 83 (0.00)  | 32 (0.81)  | 2.17 |
| 12-01 | Gp3 | g.chr1:6511797C>A    | Missense Mutation | ESPN      | p.P684T  | espin                      | 25 (0.00)  | 35 (0.14)  | 0.38 |
| 12-01 | Gp3 | g.chr21:40190521C>A  | Silent            | ETS2      | p.V254V  | v-ets avian erythroblast   | 365 (0.00) | 206 (0.51) | 1.37 |

|       |     |                      |                   |          |          |                          |            |            |      |
|-------|-----|----------------------|-------------------|----------|----------|--------------------------|------------|------------|------|
| 12-01 | Gp3 | g.chr1:157095303C>A  | Missense Mutation | ETV3     | p.C290F  | ets variant 3            | 49 (0.00)  | 23 (0.43)  | 1.16 |
| 12-01 | Gp3 | g.chr5:453982G>T     | Missense Mutation | EXOC3    | p.D288Y  | exocyst complex compo    | 167 (0.00) | 124 (0.17) | 0.45 |
| 12-01 | Gp3 | g.chr2:72968466C>A   | Silent            | EXOC6B   | p.L82L   | exocyst complex compo    | 89 (0.00)  | 41 (0.20)  | 0.52 |
| 12-01 | Gp3 | g.chr1:231472972G>T  | Missense Mutation | EXOC8    | p.H170N  | exocyst complex compo    | 27 (0.00)  | 33 (0.15)  | 0.40 |
| 12-01 | Gp3 | g.chr9:133573613C>A  | Missense Mutation | EXOSC2   | p.S112Y  | exosome component 2      | 106 (0.00) | 57 (0.19)  | 0.51 |
| 12-01 | Gp3 | g.chr6:64431213C>T   | Nonsense Mutation | EYS      | p.W2905* | eyes shut homolog (Dro   | 123 (0.00) | 50 (0.22)  | 0.59 |
| 12-01 | Gp3 | g.chr1:197032096G>T  | Missense Mutation | F13B     | p.D52E   | coagulation factor XIII, | 40 (0.00)  | 24 (0.46)  | 1.22 |
| 12-01 | Gp3 | g.chr7:143417213G>C  | Missense Mutation | FAM115C  | p.G354A  | family with sequence si  | 39 (0.00)  | 42 (0.21)  | 0.57 |
| 12-01 | Gp3 | g.chr11:6243787C>T   | Missense Mutation | FAM160A2 | p.R359Q  | family with sequence si  | 170 (0.00) | 19 (0.58)  | 1.54 |
| 12-01 | Gp3 | g.chr11:6244338G>A   | Missense Mutation | FAM160A2 | p.S303F  | family with sequence si  | 204 (0.00) | 86 (0.17)  | 0.47 |
| 12-01 | Gp3 | g.chr10:116595951C>A | Nonsense Mutation | FAM160B1 | p.C156*  | family with sequence si  | 47 (0.00)  | 30 (0.20)  | 0.53 |
| 12-01 | Gp3 | g.chr14:74409236G>A  | Missense Mutation | FAM161B  | p.P433S  | family with sequence si  | 178 (0.00) | 171 (0.28) | 0.75 |
| 12-01 | Gp3 | g.chr7:30931608C>T   | Silent            | FAM188B  | p.D754D  | family with sequence si  | 180 (0.00) | 183 (0.17) | 0.45 |
| 12-01 | Gp3 | g.chr4:2698255A>T    | Missense Mutation | FAM193A  | p.S879C  | family with sequence si  | 90 (0.00)  | 77 (0.16)  | 0.42 |
| 12-01 | Gp3 | g.chr20:33879708C>A  | Nonsense Mutation | FAM83C   | p.E134*  | family with sequence si  | 76 (0.00)  | 84 (0.20)  | 0.54 |
| 12-01 | Gp3 | g.chr20:37580841C>A  | Missense Mutation | FAM83D   | p.S509Y  | family with sequence si  | 207 (0.00) | 34 (0.15)  | 0.39 |
| 12-01 | Gp3 | g.chr3:125647388T>A  | RNA               | FAM86JP  |          | family with sequence si  | 64 (0.00)  | 19 (0.26)  | 0.70 |
| 12-01 | Gp3 | g.chr11:92533807G>A  | Missense Mutation | FAT3     | p.R2393Q | FAT atypical cadherin    | 369 (0.00) | 13 (0.69)  | 1.85 |
| 12-01 | Gp3 | g.chr8:413089C>T     | Missense Mutation | FBXO25   | p.A309V  | F-box protein 25         | 99 (0.00)  | 48 (0.25)  | 0.85 |
| 12-01 | Gp3 | g.chr3:121340958G>T  | Missense Mutation | FBXO40   | p.A228S  | F-box protein 40         | 89 (0.00)  | 53 (0.17)  | 0.45 |
| 12-01 | Gp3 | g.chr1:149760137C>T  | Missense Mutation | FCGR1A   | p.R175C  | Fc fragment of IgG, hig  | 145 (0.00) | 28 (0.79)  | 2.10 |
| 12-01 | Gp3 | g.chr1:157660153C>G  | Missense Mutation | FCRL3    | p.A528P  | Fc receptor-like 3       | 201 (0.00) | 29 (0.17)  | 0.46 |
| 12-01 | Gp3 | g.chr4:155507149C>G  | Missense Mutation | FGA      | p.V478L  | fibrinogen alpha chain   | 165 (0.00) | 27 (0.19)  | 0.49 |
| 12-01 | Gp3 | g.chr3:14860748C>A   | Missense Mutation | FGD5     | p.S57Y   | FYVE, RhoGEF and PF      | 20 (0.00)  | 39 (0.15)  | 0.41 |
| 12-01 | Gp3 | g.chr12:95603866G>A  | Silent            | FGD6     | p.V398V  | FYVE, RhoGEF and PF      | 59 (0.00)  | 32 (0.19)  | 0.50 |
| 12-01 | Gp3 | g.chr8:16850747T>A   | Missense Mutation | FGF20    | p.K157I  | fibroblast growth factor | 36 (0.00)  | 26 (0.27)  | 0.72 |
| 12-01 | Gp3 | g.chr2:164467941C>A  | Missense Mutation | FIGN     | p.G134V  | fidgetin                 | 109 (0.00) | 21 (0.24)  | 0.63 |
| 12-01 | Gp3 | g.chr1:152327883G>A  | Silent            | FLG2     | p.G793G  | filaggrin family membe   | 69 (0.00)  | 34 (0.18)  | 0.47 |
| 12-01 | Gp3 | g.chr6:159653123G>T  | Missense Mutation | FNDC1    | p.A527S  | fibronectin type III dom | 40 (0.00)  | 32 (0.50)  | 1.33 |
| 12-01 | Gp3 | g.chr9:117927G>T     | Missense Mutation | FOXD4    | p.L65I   | forkhead box D4          | 27 (0.00)  | 50 (0.18)  | 0.48 |
| 12-01 | Gp3 | g.chr7:114282582C>T  | Missense Mutation | FOXP2    | p.S298L  | forkhead box P2          | 115 (0.01) | 33 (0.27)  | 0.73 |
| 12-01 | Gp3 | g.chrX:49116597G>A   | Intron            | FOXP3    |          | forkhead box P3          | 174 (0.00) | 26 (0.31)  | 0.51 |
| 12-01 | Gp3 | g.chr9:14801763C>G   | Missense Mutation | FREM1    | p.G1194A | FRAS1 related extracell  | 52 (0.00)  | 15 (0.33)  | 0.89 |
| 12-01 | Gp3 | g.chr9:14841545C>T   | Missense Mutation | FREM1    | p.G594E  | FRAS1 related extracell  | 41 (0.00)  | 76 (0.25)  | 0.67 |
| 12-01 | Gp3 | g.chr3:69231780T>A   | Missense Mutation | FRMD4B   | p.T670S  | FERM domain containin    | 216 (0.00) | 37 (0.43)  | 1.15 |

|       |     |                     |                   |         |          |                           |            |            |      |
|-------|-----|---------------------|-------------------|---------|----------|---------------------------|------------|------------|------|
| 12-01 | Gp3 | g.chr3:46021209C>A  | Missense Mutation | FYCO1   | p.K92N   | FYVE and coiled-coil d    | 207 (0.00) | 76 (0.21)  | 0.56 |
| 12-01 | Gp3 | g.chr11:77936213C>T | Missense Mutation | GAB2    | p.G415S  | GRB2-associated bindin    | 53 (0.00)  | 30 (0.23)  | 0.62 |
| 12-01 | Gp3 | g.chr15:50596193G>T | Silent            | GABPB1  | p.G82G   | GA binding protein tran   | 125 (0.00) | 35 (0.31)  | 0.84 |
| 12-01 | Gp3 | g.chrX:151123968T>A | Missense Mutation | GABRE   | p.I337F  | gamma-aminobutyric ac     | 137 (0.00) | 26 (0.46)  | 0.77 |
| 12-01 | Gp3 | g.chr9:130027298C>T | Silent            | GARNL3  | p.L48L   | GTPase activating Rap/l   | 180 (0.00) | 98 (0.43)  | 1.14 |
| 12-01 | Gp3 | g.chr4:22737729G>A  | RNA               | GBA3    |          | glucosidase, beta, acid   | 347 (0.02) | 30 (0.30)  | 0.80 |
| 12-01 | Gp3 | g.chr1:89615153G>A  | Missense Mutation | GBP7    | p.A325V  | guanylate binding protei  | 46 (0.00)  | 21 (0.29)  | 0.76 |
| 12-01 | Gp3 | g.chr7:127223226G>A | Silent            | GCC1    | p.A390A  | GRIP and coiled-coil do   | 93 (0.00)  | 32 (0.34)  | 0.92 |
| 12-01 | Gp3 | g.chr2:85777799G>A  | Silent            | GGCX    | p.L655L  | gamma-glutamyl carbox     | 132 (0.00) | 27 (0.19)  | 0.49 |
| 12-01 | Gp3 | g.chr1:29040860C>A  | Missense Mutation | GMEB1   | p.P423T  | glucocorticoid modulato   | 211 (0.00) | 58 (0.19)  | 0.51 |
| 12-01 | Gp3 | g.chr15:28947164C>T | Missense Mutation | GOLGA8M | p.G612D  | golgin A8 family, memt    | 323 (0.00) | 167 (0.14) | 0.38 |
| 12-01 | Gp3 | g.chr2:133402925C>A | Missense Mutation | GPR39   | p.H370N  | G protein-coupled recep   | 21 (0.00)  | 33 (0.15)  | 0.58 |
| 12-01 | Gp3 | g.chr5:90124957G>A  | Missense Mutation | GPR98   | p.R5522K | G protein-coupled recep   | 183 (0.00) | 82 (0.27)  | 0.72 |
| 12-01 | Gp3 | g.chr21:31015243G>A | Missense Mutation | GRIK1   | p.A334V  | glutamate receptor, iono  | 87 (0.00)  | 15 (0.40)  | 1.07 |
| 12-01 | Gp3 | g.chr16:10273995C>A | Missense Mutation | GRIN2A  | p.G92W   | glutamate receptor, iono  | 98 (0.00)  | 131 (0.18) | 0.49 |
| 12-01 | Gp3 | g.chr7:86416078G>T  | Nonsense Mutation | GRM3    | p.E324*  | glutamate receptor, met   | 31 (0.00)  | 35 (0.14)  | 0.38 |
| 12-01 | Gp3 | g.chr13:51598437C>T | RNA               | GUCY1B2 |          | guanylate cyclase 1, sol  | 18 (0.00)  | 15 (0.67)  | 1.78 |
| 12-01 | Gp3 | g.chr19:17160684C>A | Nonstop Mutation  | HAUS8   | p.*411L  | HAUS augmin-like com      | 23 (0.00)  | 38 (0.32)  | 0.84 |
| 12-01 | Gp3 | g.chr7:18737505A>G  | Intron            | HDAC9   |          | histone deacetylase 9     | 46 (0.00)  | 43 (0.21)  | 0.56 |
| 12-01 | Gp3 | g.chr7:18779853G>T  | Intron            | HDAC9   |          | histone deacetylase 9     | 65 (0.02)  | 31 (0.16)  | 0.43 |
| 12-01 | Gp3 | g.chr7:18780242T>A  | Intron            | HDAC9   |          | histone deacetylase 9     | 296 (0.00) | 131 (0.20) | 0.53 |
| 12-01 | Gp3 | g.chr7:18834307G>A  | Intron            | HDAC9   |          | histone deacetylase 9     | 17 (0.00)  | 23 (0.43)  | 1.16 |
| 12-01 | Gp3 | g.chr7:18993390C>T  | Intron            | HDAC9   |          | histone deacetylase 9     | 65 (0.00)  | 14 (0.57)  | 1.52 |
| 12-01 | Gp3 | g.chr7:18994953C>A  | Intron            | HDAC9   |          | histone deacetylase 9     | 35 (0.00)  | 71 (0.32)  | 0.86 |
| 12-01 | Gp3 | g.chr7:19023413G>A  | Intron            | HDAC9   |          | histone deacetylase 9     | 35 (0.00)  | 21 (0.43)  | 1.14 |
| 12-01 | Gp3 | g.chr17:58121370C>A | Missense Mutation | HEATR6  | p.G1034W | HEAT repeat containing    | 184 (0.00) | 27 (0.33)  | 0.89 |
| 12-01 | Gp3 | g.chr12:66700236T>C | Missense Mutation | HELB    | p.M240T  | helicase (DNA) B          | 17 (0.00)  | 12 (0.58)  | 1.56 |
| 12-01 | Gp3 | g.chr15:20644181C>T | RNA               | HERC2P3 |          | hect domain and RLD 2     | 81 (0.00)  | 27 (0.30)  | 0.79 |
| 12-01 | Gp3 | g.chr17:46669654G>A | Nonsense Mutation | HOXB5   | p.Q243*  | homeobox B5               | 89 (0.00)  | 143 (0.20) | 0.54 |
| 12-01 | Gp3 | g.chr12:54403431C>A | Missense Mutation | HOXC8   | p.N121K  | homeobox C8               | 115 (0.00) | 191 (0.21) | 0.57 |
| 12-01 | Gp3 | g.chrX:131763005G>T | Missense Mutation | HS6ST2  | p.P395H  | heparan sulfate 6-O-sulf  | 88 (0.00)  | 51 (0.63)  | 1.05 |
| 12-01 | Gp3 | g.chr4:3148669C>T   | Missense Mutation | HTT     | p.L1097F | huntingtin                | 91 (0.00)  | 20 (0.30)  | 0.80 |
| 12-01 | Gp3 | g.chr19:10403522G>A | Missense Mutation | ICAM5   | p.S399N  | intercellular adhesion m  | 33 (0.00)  | 49 (0.22)  | 0.60 |
| 12-01 | Gp3 | g.chr9:21077505C>A  | Missense Mutation | IFNB1   | p.V122F  | interferon, beta 1, fibro | 110 (0.00) | 30 (0.17)  | 0.44 |
| 12-01 | Gp3 | g.chr19:36230666G>A | Silent            | IGFLR1  | p.A222A  | IGF-like family recepto   | 49 (0.00)  | 88 (0.15)  | 0.39 |

|       |     |                      |                   |          |          |                                |            |            |      |
|-------|-----|----------------------|-------------------|----------|----------|--------------------------------|------------|------------|------|
| 12-01 | Gp3 | g.chr2:89442310G>A   | RNA               | IGKV3-20 |          | immunoglobulin kappa           | 239 (0.00) | 70 (0.17)  | 0.46 |
| 12-01 | Gp3 | g.chr22:23077316G>T  | RNA               | IGLV2-18 |          | immunoglobulin lambda          | 109 (0.00) | 34 (0.21)  | 0.55 |
| 12-01 | Gp3 | g.chr22:17583114C>A  | Silent            | IL17RA   | p.T228T  | interleukin 17 receptor        | 111 (0.00) | 130 (0.15) | 0.41 |
| 12-01 | Gp3 | g.chr10:6061883C>T   | Missense Mutation | IL2RA    | p.S202N  | interleukin 2 receptor, alpha  | 90 (0.00)  | 28 (0.36)  | 0.95 |
| 12-01 | Gp3 | g.chr16:3117404G>A   | Silent            | IL32     | p.L14L   | interleukin 32                 | 86 (0.00)  | 103 (0.26) | 0.70 |
| 12-01 | Gp3 | g.chr7:128035248C>A  | Missense Mutation | IMPDH1   | p.A358S  | IMP (inosine 5'-monophosphate) | 54 (0.00)  | 57 (0.16)  | 0.42 |
| 12-01 | Gp3 | g.chr4:142974971C>T  | Intron            | INPP4B   |          | inositol polyphosphate-4       | 19 (0.00)  | 18 (0.50)  | 1.33 |
| 12-01 | Gp3 | g.chr4:143094332C>A  | Intron            | INPP4B   |          | inositol polyphosphate-4       | 38 (0.00)  | 19 (0.26)  | 0.70 |
| 12-01 | Gp3 | g.chr4:143150775C>A  | Intron            | INPP4B   |          | inositol polyphosphate-4       | 82 (0.00)  | 36 (0.28)  | 0.74 |
| 12-01 | Gp3 | g.chr4:143181429G>A  | Intron            | INPP4B   |          | inositol polyphosphate-4       | 53 (0.00)  | 35 (0.14)  | 0.38 |
| 12-01 | Gp3 | g.chr4:143217930C>A  | Intron            | INPP4B   |          | inositol polyphosphate-4       | 16 (0.00)  | 31 (0.16)  | 0.43 |
| 12-01 | Gp3 | g.chr4:143254386C>A  | Intron            | INPP4B   |          | inositol polyphosphate-4       | 62 (0.00)  | 22 (0.23)  | 0.61 |
| 12-01 | Gp3 | g.chr4:143254397G>A  | Intron            | INPP4B   |          | inositol polyphosphate-4       | 60 (0.00)  | 22 (0.23)  | 0.61 |
| 12-01 | Gp3 | g.chr4:143260019C>G  | Intron            | INPP4B   |          | inositol polyphosphate-4       | 196 (0.00) | 27 (0.70)  | 1.88 |
| 12-01 | Gp3 | g.chr4:143318370C>T  | Intron            | INPP4B   |          | inositol polyphosphate-4       | 106 (0.01) | 82 (0.24)  | 0.65 |
| 12-01 | Gp3 | g.chr4:143444386C>T  | Intron            | INPP4B   |          | inositol polyphosphate-4       | 62 (0.00)  | 50 (0.58)  | 1.55 |
| 12-01 | Gp3 | g.chr4:143458232G>T  | Intron            | INPP4B   |          | inositol polyphosphate-4       | 57 (0.00)  | 13 (0.54)  | 1.44 |
| 12-01 | Gp3 | g.chr4:143484903C>T  | Intron            | INPP4B   |          | inositol polyphosphate-4       | 49 (0.00)  | 27 (0.74)  | 1.98 |
| 12-01 | Gp3 | g.chr4:143544222C>A  | Intron            | INPP4B   |          | inositol polyphosphate-4       | 83 (0.00)  | 29 (0.66)  | 1.75 |
| 12-01 | Gp3 | g.chr4:143611965G>T  | Intron            | INPP4B   |          | inositol polyphosphate-4       | 27 (0.00)  | 29 (0.28)  | 0.74 |
| 12-01 | Gp3 | g.chr4:143708500C>A  | Intron            | INPP4B   |          | inositol polyphosphate-4       | 59 (0.00)  | 24 (0.21)  | 0.56 |
| 12-01 | Gp3 | g.chr4:143708512C>A  | Intron            | INPP4B   |          | inositol polyphosphate-4       | 62 (0.00)  | 17 (0.29)  | 0.78 |
| 12-01 | Gp3 | g.chr10:134511343G>A | Missense Mutation | INPP5A   | p.G132S  | inositol polyphosphate-4       | 71 (0.00)  | 43 (0.26)  | 0.68 |
| 12-01 | Gp3 | g.chr1:38341283G>A   | Nonsense Mutation | INPP5B   | p.R595*  | inositol polyphosphate-4       | 105 (0.00) | 18 (0.28)  | 0.74 |
| 12-01 | Gp3 | g.chr8:19694646G>A   | Silent            | INTS10   | p.S538S  | integrator complex subunit     | 39 (0.00)  | 30 (0.23)  | 0.62 |
| 12-01 | Gp3 | g.chr8:95839632G>A   | Splice Site       | INTS8    |          | integrator complex subunit     | 64 (0.00)  | 23 (0.22)  | 0.58 |
| 12-01 | Gp3 | g.chr1:201841963G>A  | Missense Mutation | IPO9     | p.A862T  | importin 9                     | 32 (0.00)  | 11 (0.45)  | 1.21 |
| 12-01 | Gp3 | g.chr16:31341876G>T  | Missense Mutation | ITGAM    | p.D1077Y | integrin, alpha M (comp)       | 66 (0.00)  | 44 (0.14)  | 0.45 |
| 12-01 | Gp3 | g.chr3:52813449G>A   | Splice Site       | ITIH1    | p.A138T  | inter-alpha-trypsin inhibitor  | 61 (0.00)  | 53 (0.17)  | 0.45 |
| 12-01 | Gp3 | g.chr1:160920895C>A  | Missense Mutation | ITLN2    | p.G127C  | intelectin 2                   | 56 (0.00)  | 51 (0.18)  | 0.47 |
| 12-01 | Gp3 | g.chr3:4714915G>T    | Missense Mutation | ITPR1    | p.R752L  | inositol 1,4,5-trisphosphate   | 269 (0.00) | 95 (0.23)  | 0.62 |
| 12-01 | Gp3 | g.chr12:26816730G>A  | Missense Mutation | ITPR2    | p.S534L  | inositol 1,4,5-trisphosphate   | 21 (0.00)  | 14 (0.36)  | 0.95 |
| 12-01 | Gp3 | g.chr17:74717917C>G  | Missense Mutation | JMJD6    | p.V302L  | jumonji domain containing      | 25 (0.00)  | 17 (0.29)  | 0.78 |
| 12-01 | Gp3 | g.chr19:11287414G>C  | Missense Mutation | KANK2    | p.P542A  | KN motif and ankyrin repeat    | 20 (0.00)  | 30 (0.37)  | 0.98 |
| 12-01 | Gp3 | g.chr8:41791414C>A   | Missense Mutation | KAT6A    | p.A1442S | K(lysine) acetyltransferase    | 162 (0.00) | 32 (0.19)  | 0.50 |

|       |     |                      |                   |           |          |                                                               |            |            |      |
|-------|-----|----------------------|-------------------|-----------|----------|---------------------------------------------------------------|------------|------------|------|
| 12-01 | Gp3 | g.chr5:169931626G>A  | Missense Mutation | KCNIP1    | p.R17Q   | Kv channel interacting p32 (0.00)                             | 63 (0.32)  | 0.67       |      |
| 12-01 | Gp3 | g.chr17:21318821A>C  | Missense Mutation | KCNJ12    | p.E56A   | potassium inwardly-rectifying channel subunit 12 (0.02)       | 83 (0.17)  | 0.45       |      |
| 12-01 | Gp3 | g.chr11:2604727C>A   | Silent            | KCNQ1     | p.I328I  | potassium voltage-gated channel subfamily Q member 1 (0.00)   | 27 (0.22)  | 0.59       |      |
| 12-01 | Gp3 | g.chr5:143853540G>A  | Missense Mutation | KCTD16    | p.A384T  | potassium channel tetramerization domain containing 16 (0.00) | 61 (0.15)  | 0.39       |      |
| 12-01 | Gp3 | g.chr12:121970853C>A | Silent            | KDM2B     | p.L32L   | lysine (K)-specific demethylase 2B (0.00)                     | 34 (0.15)  | 0.39       |      |
| 12-01 | Gp3 | g.chr5:137727273G>T  | Missense Mutation | KDM3B     | p.S651I  | lysine (K)-specific demethylase 3B (0.00)                     | 55 (0.27)  | 0.73       |      |
| 12-01 | Gp3 | g.chr13:46924365G>T  | Nonsense Mutation | KIAA0226L | p.Y327*  | KIAA0226-like                                                 | 100 (0.01) | 19 (0.26)  | 0.70 |
| 12-01 | Gp3 | g.chr14:58965518G>T  | Silent            | KIAA0586  | p.V1389V | KIAA0586                                                      | 24 (0.00)  | 17 (0.41)  | 1.10 |
| 12-01 | Gp3 | g.chr4:37440644G>C   | Missense Mutation | KIAA1239  | p.V310L  |                                                               | 79 (0.00)  | 15 (0.33)  | 0.89 |
| 12-01 | Gp3 | g.chr7:138604131G>A  | Silent            | KIAA1549  | p.L81L   | KIAA1549                                                      | 180 (0.00) | 36 (0.44)  | 1.19 |
| 12-01 | Gp3 | g.chr8:29003917G>T   | Missense Mutation | KIF13B    | p.S722Y  | kinesin family member 13B (0.00)                              | 206 (0.00) | 18 (0.28)  | 0.74 |
| 12-01 | Gp3 | g.chr1:10316334G>A   | Missense Mutation | KIF1B     | p.A46T   | kinesin family member 1B (0.00)                               | 27 (0.00)  | 44 (0.36)  | 0.97 |
| 12-01 | Gp3 | g.chr5:61659025G>T   | Missense Mutation | KIF2A     | p.R360S  | kinesin heavy chain member 2A (0.00)                          | 89 (0.00)  | 18 (0.28)  | 0.74 |
| 12-01 | Gp3 | g.chr19:55330021G>T  | Missense Mutation | KIR3DL1   | p.A108S  | killer cell immunoglobulin-like receptor 3DL1 (0.00)          | 50 (0.00)  | 37 (0.22)  | 0.58 |
| 12-01 | Gp3 | g.chr6:43029222C>A   | Missense Mutation | KLC4      | p.T50N   | kinesin light chain 4 (0.00)                                  | 71 (0.00)  | 97 (0.15)  | 0.41 |
| 12-01 | Gp3 | g.chr16:87795572G>A  | Silent            | KLHDC4    | p.C58C   | kelch domain containing 4 (0.00)                              | 72 (0.00)  | 11 (0.82)  | 0.96 |
| 12-01 | Gp3 | g.chr7:98786164G>A   | Missense Mutation | KPNA7     | p.T220M  | karyopherin alpha 7 (importin alpha 7) (0.00)                 | 83 (0.00)  | 51 (0.22)  | 0.58 |
| 12-01 | Gp3 | g.chr1:152732258G>T  | Missense Mutation | KPRP      | p.C65F   | keratinocyte proline-rich protein 1 (0.00)                    | 69 (0.00)  | 28 (0.18)  | 0.48 |
| 12-01 | Gp3 | g.chr12:53343293C>A  | Silent            | KRT18     | p.I112I  | keratin 18 (0.00)                                             | 25 (0.00)  | 53 (0.17)  | 0.45 |
| 12-01 | Gp3 | g.chr21:46078008G>A  | Missense Mutation | KRTAP12-3 | p.V38M   | keratin associated protein 12-3 (0.00)                        | 150 (0.00) | 234 (0.14) | 0.49 |
| 12-01 | Gp3 | g.chr21:46078009T>A  | Missense Mutation | KRTAP12-3 | p.V38E   | keratin associated protein 12-3 (0.00)                        | 150 (0.00) | 233 (0.14) | 0.50 |
| 12-01 | Gp3 | g.chr17:39296558C>A  | Missense Mutation | KRTAP4-6  | p.C61F   | keratin associated protein 4-6 (0.00)                         | 76 (0.00)  | 75 (0.15)  | 0.39 |
| 12-01 | Gp3 | g.chr22:41605776G>A  | Missense Mutation | L3MBTL2   | p.R34Q   | l(3)mbt-like 2 (Drosophila) (0.00)                            | 83 (0.00)  | 16 (0.31)  | 0.83 |
| 12-01 | Gp3 | g.chr22:41616870G>A  | Missense Mutation | L3MBTL2   | p.R284Q  | l(3)mbt-like 2 (Drosophila) (0.00)                            | 83 (0.00)  | 33 (0.15)  | 0.40 |
| 12-01 | Gp3 | g.chr6:112493842C>T  | Missense Mutation | LAMA4     | p.A508T  | laminin, alpha 4 (0.00)                                       | 65 (0.00)  | 29 (0.31)  | 0.83 |
| 12-01 | Gp3 | g.chr7:107605030G>T  | Nonsense Mutation | LAMB1     | p.Y555*  | laminin, beta 1 (0.00)                                        | 224 (0.00) | 50 (0.26)  | 0.69 |
| 12-01 | Gp3 | g.chr1:209824266A>G  | Silent            | LAMB3     | p.C8C    | laminin, beta 3 (0.00)                                        | 97 (0.00)  | 53 (0.34)  | 0.91 |
| 12-01 | Gp3 | g.chr1:183109562C>T  | Silent            | LAMC1     | p.A1499A | laminin, gamma 1 (form 1) (0.00)                              | 28 (0.00)  | 21 (0.43)  | 0.85 |
| 12-01 | Gp3 | g.chr10:909706G>A    | Missense Mutation | LARP4B    | p.S136F  | La ribonucleoprotein domain containing 4B (0.00)              | 20 (0.00)  | 21 (0.29)  | 0.76 |
| 12-01 | Gp3 | g.chr19:11230873G>T  | Missense Mutation | LDLR      | p.D651Y  | low density lipoprotein receptor (0.00)                       | 156 (0.00) | 42 (0.19)  | 0.51 |
| 12-01 | Gp3 | g.chr3:189681794A>G  | Missense Mutation | LEPREL1   | p.C663R  | leprecan-like 1 (0.00)                                        | 49 (0.00)  | 42 (0.14)  | 0.38 |
| 12-01 | Gp3 | g.chr19:55106760G>T  | Missense Mutation | LILRA1    | p.G185V  | leukocyte immunoglobulin-like receptor A1 (0.00)              | 121 (0.00) | 47 (0.19)  | 0.51 |
| 12-01 | Gp3 | g.chr4:41687784C>A   | Missense Mutation | LIMCH1    | p.P798Q  | LIM and calponin homology domain containing 1 (0.00)          | 31 (0.00)  | 34 (0.76)  | 2.04 |
| 12-01 | Gp3 | g.chr11:74203281G>T  | Missense Mutation | LIPT2     | p.L199I  | lipoyl(octanoyl) transferase 2 (0.02)                         | 61 (0.02)  | 38 (0.16)  | 0.42 |
| 12-01 | Gp3 | g.chr7:97820077G>T   | Missense Mutation | LMTK2     | p.A346S  | lemur tyrosine kinase 2 (0.00)                                | 127 (0.00) | 25 (0.60)  | 1.60 |

|       |     |                     |                   |         |          |                           |            |            |      |
|-------|-----|---------------------|-------------------|---------|----------|---------------------------|------------|------------|------|
| 12-01 | Gp3 | g.chr4:62758388G>C  | Missense Mutation | LPHN3   | p.G431R  | latrophilin 3             | 241 (0.00) | 43 (0.51)  | 0.63 |
| 12-01 | Gp3 | g.chr3:197597030G>A | Splice Site       | LRCH3   |          | leucine-rich repeats and  | 211 (0.00) | 83 (0.16)  | 0.42 |
| 12-01 | Gp3 | g.chr4:110772898G>A | Missense Mutation | LRIT3   | p.A119T  | leucine-rich repeat, imm  | 31 (0.00)  | 31 (0.26)  | 0.69 |
| 12-01 | Gp3 | g.chr11:46921925T>A | Silent            | LRP4    | p.L68L   | low density lipoprotein   | 174 (0.00) | 29 (0.21)  | 0.55 |
| 12-01 | Gp3 | g.chr1:90048293G>A  | Nonsense Mutation | LRRC8B  | p.W28*   | leucine rich repeat conta | 103 (0.00) | 53 (0.23)  | 0.60 |
| 12-01 | Gp3 | g.chr3:3888041C>A   | Silent            | LRRN1   | p.A572A  | leucine rich repeat neur  | 191 (0.00) | 48 (0.17)  | 0.44 |
| 12-01 | Gp3 | g.chr3:119463031G>T | Missense Mutation | MAATS1  | p.E630D  | MYCBP-associated, tes     | 72 (0.01)  | 55 (0.16)  | 0.44 |
| 12-01 | Gp3 | g.chr1:39852997G>T  | Missense Mutation | MACF1   | p.R4833L | microtubule-actin crossl  | 243 (0.00) | 39 (0.33)  | 0.89 |
| 12-01 | Gp3 | g.chr11:47311768G>A | Silent            | MADD    | p.Q1024Q | MAP-kinase activating     | 109 (0.00) | 115 (0.25) | 0.67 |
| 12-01 | Gp3 | g.chrX:75648715C>T  | Missense Mutation | MAGEE1  | p.A131V  | melanoma antigen famil    | 16 (0.00)  | 19 (0.26)  | 0.44 |
| 12-01 | Gp3 | g.chr7:77734131C>G  | Intron            | MAGI2   |          | membrane associated gu    | 102 (0.00) | 64 (0.30)  | 0.79 |
| 12-01 | Gp3 | g.chr7:77804907G>T  | Intron            | MAGI2   |          | membrane associated gu    | 63 (0.00)  | 31 (0.39)  | 1.03 |
| 12-01 | Gp3 | g.chr7:77839650C>T  | Intron            | MAGI2   |          | membrane associated gu    | 77 (0.01)  | 49 (0.39)  | 1.03 |
| 12-01 | Gp3 | g.chr7:77875724G>T  | Intron            | MAGI2   |          | membrane associated gu    | 201 (0.00) | 54 (0.26)  | 0.69 |
| 12-01 | Gp3 | g.chr7:77975239C>T  | Splice Site       | MAGI2   | p.E409K  | membrane associated gu    | 277 (0.00) | 153 (0.18) | 0.47 |
| 12-01 | Gp3 | g.chr7:78047539C>A  | Intron            | MAGI2   |          | membrane associated gu    | 68 (0.00)  | 21 (0.33)  | 0.89 |
| 12-01 | Gp3 | g.chr7:78095867G>T  | Intron            | MAGI2   |          | membrane associated gu    | 22 (0.00)  | 26 (0.50)  | 1.33 |
| 12-01 | Gp3 | g.chr7:78131841G>T  | Intron            | MAGI2   |          | membrane associated gu    | 17 (0.00)  | 31 (0.35)  | 0.95 |
| 12-01 | Gp3 | g.chr7:78162223G>C  | Intron            | MAGI2   |          | membrane associated gu    | 73 (0.00)  | 36 (0.19)  | 0.52 |
| 12-01 | Gp3 | g.chr7:78192650G>T  | Intron            | MAGI2   |          | membrane associated gu    | 67 (0.00)  | 41 (0.51)  | 1.37 |
| 12-01 | Gp3 | g.chr7:78288315C>T  | Intron            | MAGI2   |          | membrane associated gu    | 34 (0.00)  | 47 (0.15)  | 0.40 |
| 12-01 | Gp3 | g.chr7:78361525C>A  | Intron            | MAGI2   |          | membrane associated gu    | 57 (0.00)  | 56 (0.46)  | 1.24 |
| 12-01 | Gp3 | g.chr7:78408631C>T  | Intron            | MAGI2   |          | membrane associated gu    | 44 (0.00)  | 42 (0.40)  | 1.08 |
| 12-01 | Gp3 | g.chr7:78408648G>C  | Intron            | MAGI2   |          | membrane associated gu    | 43 (0.00)  | 37 (0.46)  | 1.23 |
| 12-01 | Gp3 | g.chr7:78536441G>A  | Intron            | MAGI2   |          | membrane associated gu    | 83 (0.00)  | 95 (0.22)  | 0.59 |
| 12-01 | Gp3 | g.chr7:78619941C>T  | Intron            | MAGI2   |          | membrane associated gu    | 55 (0.00)  | 29 (0.21)  | 0.55 |
| 12-01 | Gp3 | g.chr7:78871332G>T  | Intron            | MAGI2   |          | membrane associated gu    | 48 (0.00)  | 21 (0.48)  | 1.27 |
| 12-01 | Gp3 | g.chr7:78953290G>C  | Intron            | MAGI2   |          | membrane associated gu    | 177 (0.00) | 70 (0.16)  | 0.42 |
| 12-01 | Gp3 | g.chr7:79043588C>T  | Intron            | MAGI2   |          | membrane associated gu    | 43 (0.00)  | 104 (0.17) | 0.46 |
| 12-01 | Gp3 | g.chr7:79062233G>T  | Intron            | MAGI2   |          | membrane associated gu    | 376 (0.00) | 111 (0.19) | 0.50 |
| 12-01 | Gp3 | g.chr19:17838858C>A | Missense Mutation | MAP1S   | p.L889I  | microtubule-associated    | 120 (0.00) | 30 (0.20)  | 0.53 |
| 12-01 | Gp3 | g.chr3:185167723G>A | Missense Mutation | MAP3K13 | p.G349E  | mitogen-activated protei  | 151 (0.00) | 27 (0.19)  | 0.49 |
| 12-01 | Gp3 | g.chr1:27682174G>A  | Silent            | MAP3K6  | p.I1258I | mitogen-activated protei  | 80 (0.00)  | 71 (0.20)  | 0.53 |
| 12-01 | Gp3 | g.chr6:90388331G>A  | Silent            | MDN1    | p.H4133H | MDN1, midasin homolc      | 197 (0.00) | 47 (0.19)  | 0.51 |
| 12-01 | Gp3 | g.chr18:48473499C>T | Missense Mutation | ME2     | p.P567L  | malic enzyme 2, NAD(+)    | 72 (0.00)  | 34 (0.18)  | 0.47 |



|       |     |                      |                   |         |          |                                    |            |            |      |
|-------|-----|----------------------|-------------------|---------|----------|------------------------------------|------------|------------|------|
| 12-01 | Gp3 | g.chr15:100211603G>A | Missense Mutation | MEF2A   | p.E112K  | myocyte enhancer factor 2          | 217 (0.00) | 68 (0.21)  | 0.55 |
| 12-01 | Gp3 | g.chr15:66190367C>T  | Missense Mutation | MEGF11  | p.D1014N | multiple EGF-like-domain           | 87 (0.00)  | 11 (0.64)  | 1.70 |
| 12-01 | Gp3 | g.chr18:29790595G>T  | Nonsense Mutation | MEP1B   | p.E351*  | meprin A, beta                     | 133 (0.00) | 68 (0.28)  | 0.75 |
| 12-01 | Gp3 | g.chr4:170913335C>T  | Missense Mutation | MFAP3L  | p.V142I  | microfibrillar-associated          | 67 (0.00)  | 23 (0.26)  | 0.70 |
| 12-01 | Gp3 | g.chr12:53647534G>A  | Silent            | MFSD5   | p.K305K  | major facilitator superfamily      | 50 (0.02)  | 115 (0.21) | 0.56 |
| 12-01 | Gp3 | g.chr14:39703397G>T  | Missense Mutation | MIA2    | p.A27S   | melanoma inhibitory factor         | 86 (0.00)  | 47 (0.32)  | 0.85 |
| 12-01 | Gp3 | g.chr1:222828015A>T  | Missense Mutation | MIA3    | p.E1496V | melanoma inhibitory factor         | 112 (0.01) | 15 (0.47)  | 1.24 |
| 12-01 | Gp3 | g.chr22:18374282C>T  | Missense Mutation | MICAL3  | p.A555T  | microtubule associated protein     | 196 (0.00) | 70 (0.19)  | 0.50 |
| 12-01 | Gp3 | g.chr22:39909592C>T  | Missense Mutation | MIEF1   | p.P219L  | mitochondrial elongation factor    | 178 (0.00) | 66 (0.23)  | 0.61 |
| 12-01 | Gp3 | g.chr9:20365683G>A   | Silent            | MLLT3   | p.S395S  | myeloid/lymphoid or myeloid        | 81 (0.00)  | 46 (0.20)  | 0.52 |
| 12-01 | Gp3 | g.chr15:56735936C>T  | Missense Mutation | MNS1    | p.R268K  | meiosis-specific nuclear protein   | 17 (0.00)  | 9 (0.67)   | 1.78 |
| 12-01 | Gp3 | g.chr9:13193278C>T   | Missense Mutation | MPDZ    | p.G564E  | multiple PDZ domain protein        | 102 (0.00) | 52 (0.27)  | 0.72 |
| 12-01 | Gp3 | g.chr11:18955858C>A  | Missense Mutation | MRGPRX1 | p.W158C  | MAS-related GPR, member            | 79 (0.00)  | 45 (0.20)  | 0.53 |
| 12-01 | Gp3 | g.chr20:35783489G>A  | Silent            | MROH8   | p.L351L  | maestro heat-like repeat           | 243 (0.00) | 31 (0.19)  | 0.52 |
| 12-01 | Gp3 | g.chr9:138395749G>T  | Missense Mutation | MRPS2   | p.G221C  | mitochondrial ribosomal protein    | 43 (0.00)  | 62 (0.15)  | 0.39 |
| 12-01 | Gp3 | g.chr9:125033207C>A  | Missense Mutation | MRRF    | p.P13T   | mitochondrial ribosome             | 284 (0.00) | 37 (0.49)  | 1.30 |
| 12-01 | Gp3 | g.chr11:10626069C>A  | Missense Mutation | MRVII   | p.L542F  | murine retrovirus integrase        | 182 (0.00) | 14 (0.71)  | 1.90 |
| 12-01 | Gp3 | g.chr3:9695422G>A    | Missense Mutation | MTMR14  | p.E93K   | myotubularin related protein       | 160 (0.00) | 47 (0.19)  | 0.51 |
| 12-01 | Gp3 | g.chr7:100646425G>T  | Missense Mutation | MUC12   | p.S437I  | mucin 12, cell surface associated  | 191 (0.00) | 81 (0.20)  | 0.53 |
| 12-01 | Gp3 | g.chr7:100656311G>T  | Missense Mutation | MUC12   | p.D5319Y | mucin 12, cell surface associated  | 44 (0.00)  | 31 (0.23)  | 0.60 |
| 12-01 | Gp3 | g.chr7:100682238G>T  | Missense Mutation | MUC17   | p.S2514I | mucin 17, cell surface associated  | 216 (0.00) | 52 (0.15)  | 0.41 |
| 12-01 | Gp3 | g.chr7:100683734G>T  | Missense Mutation | MUC17   | p.D3013Y | mucin 17, cell surface associated  | 155 (0.00) | 44 (0.23)  | 0.61 |
| 12-01 | Gp3 | g.chr3:195453080C>A  | Missense Mutation | MUC20   | p.L536I  | mucin 20, cell surface associated  | 72 (0.00)  | 77 (0.21)  | 0.55 |
| 12-01 | Gp3 | g.chr7:100551653C>A  | Missense Mutation | MUC3A   | p.P135H  | mucin 3A, cell surface associated  | 512 (0.00) | 16 (0.31)  | 0.83 |
| 12-01 | Gp3 | g.chr19:54377419C>T  | Silent            | MYADM   | p.I212I  | myeloid-associated differentiation | 75 (0.00)  | 114 (0.17) | 0.44 |
| 12-01 | Gp3 | g.chr20:42320821C>A  | Missense Mutation | MYBL2   | p.H175Q  | v-myb avian myeloblast             | 156 (0.00) | 48 (0.19)  | 0.50 |
| 12-01 | Gp3 | g.chr16:15835664G>A  | Nonsense Mutation | MYH11   | p.Q869*  | myosin, heavy chain 11             | 129 (0.00) | 66 (0.29)  | 0.77 |
| 12-01 | Gp3 | g.chr17:10441084G>A  | Silent            | MYH2    | p.H495H  | myosin, heavy chain 2, regulatory  | 146 (0.00) | 39 (0.23)  | 0.62 |
| 12-01 | Gp3 | g.chr7:44180602G>A   | Silent            | MYL7    | p.V25V   | myosin, light chain 7, regulatory  | 20 (0.00)  | 24 (0.21)  | 0.56 |
| 12-01 | Gp3 | g.chr12:56620165C>A  | Missense Mutation | NABP2   | p.A133D  | nucleic acid binding protein       | 147 (0.00) | 39 (0.49)  | 1.30 |
| 12-01 | Gp3 | g.chr12:78511838C>G  | Missense Mutation | NAV3    | p.T934R  | neuron navigator 3                 | 71 (0.00)  | 29 (0.17)  | 0.46 |
| 12-01 | Gp3 | g.chr12:78579392G>C  | Missense Mutation | NAV3    | p.D1880H | neuron navigator 3                 | 50 (0.00)  | 28 (0.21)  | 0.57 |
| 12-01 | Gp3 | g.chr3:47039994C>A   | Missense Mutation | NBEAL2  | p.Q1054K | neurobeachin-like 2                | 63 (0.00)  | 60 (0.15)  | 0.40 |
| 12-01 | Gp3 | g.chr11:134037897G>A | Silent            | NCAPD3  | p.I1189I | non-SMC condensin II complex       | 132 (0.00) | 79 (0.22)  | 0.57 |
| 12-01 | Gp3 | g.chr18:9122560C>T   | Missense Mutation | NDUFV2  | p.T117I  | NADH dehydrogenase (ubiquinone)    | 115 (0.00) | 55 (0.44)  | 1.16 |

|       |     |                      |                   |        |          |                                              |            |            |      |
|-------|-----|----------------------|-------------------|--------|----------|----------------------------------------------|------------|------------|------|
| 12-01 | Gp3 | g.chr2:152470939G>A  | Missense Mutation | NEB    | p.P3818S | nebulin                                      | 154 (0.00) | 159 (0.43) | 1.14 |
| 12-01 | Gp3 | g.chr9:127089719C>T  | Missense Mutation | NEK6   | p.S206F  | NIMA-related kinase 6                        | 37 (0.00)  | 70 (0.19)  | 0.50 |
| 12-01 | Gp3 | g.chr1:204970303G>C  | Missense Mutation | NFASC  | p.D1009H | neurofascin                                  | 89 (0.00)  | 64 (0.20)  | 0.54 |
| 12-01 | Gp3 | g.chr14:24839423C>A  | Missense Mutation | NFATC4 | p.S336R  | nuclear factor of activated T cells 4        | 19 (0.00)  | 48 (0.17)  | 0.44 |
| 12-01 | Gp3 | g.chrX:17744321G>C   | Missense Mutation | NHS    | p.A678P  | Nance-Horan syndrome                         | 130 (0.00) | 48 (0.23)  | 0.38 |
| 12-01 | Gp3 | g.chr1:24782668G>T   | Missense Mutation | NIPAL3 | p.M226I  | NIPA-like domain containing protein 3        | 130 (0.00) | 56 (0.29)  | 0.76 |
| 12-01 | Gp3 | g.chr17:33464104C>A  | Silent            | NLE1   | p.S248S  | notchless homolog 1 (Drosophila)             | 62 (0.00)  | 99 (0.15)  | 0.40 |
| 12-01 | Gp3 | g.chr19:55451785C>T  | Nonsense Mutation | NLRP7  | p.W134*  | NLR family, pyrin domain containing 7        | 412 (0.00) | 267 (0.14) | 0.38 |
| 12-01 | Gp3 | g.chr2:10712206C>T   | Silent            | NOL10  | p.S686S  | nucleolar protein 10                         | 167 (0.00) | 19 (0.53)  | 1.40 |
| 12-01 | Gp3 | g.chr7:156746821C>T  | Silent            | NOM1   | p.S379S  | nucleolar protein with multiple domains      | 48 (0.00)  | 28 (0.18)  | 0.48 |
| 12-01 | Gp3 | g.chr9:139409088T>C  | Missense Mutation | NOTCH1 | p.E694G  | notch 1                                      | 18 (0.00)  | 22 (0.23)  | 0.61 |
| 12-01 | Gp3 | g.chr11:89135595C>A  | Nonsense Mutation | NOX4   | p.E249*  | NADPH oxidase 4                              | 21 (0.00)  | 22 (0.23)  | 0.61 |
| 12-01 | Gp3 | g.chr19:36326618T>A  | Missense Mutation | NPHS1  | p.E1052V | nephrosis 1, congenital, autosomal recessive | 148 (0.00) | 20 (0.25)  | 0.67 |
| 12-01 | Gp3 | g.chr11:9009143G>A   | Missense Mutation | NRIP3  | p.T125I  | nuclear receptor interacting protein 3       | 107 (0.00) | 37 (0.30)  | 0.79 |
| 12-01 | Gp3 | g.chr12:5603677C>A   | Nonsense Mutation | NTF3   | p.Y112*  | neurotrophin 3                               | 164 (0.00) | 136 (0.16) | 0.43 |
| 12-01 | Gp3 | g.chr16:2522444G>A   | Missense Mutation | NTN3   | p.D248N  | netrin 3                                     | 17 (0.00)  | 35 (0.51)  | 1.37 |
| 12-01 | Gp3 | g.chr15:88678366G>T  | Silent            | NTRK3  | p.T292T  | neurotrophic tyrosine kinase receptor type 3 | 148 (0.00) | 42 (0.14)  | 0.38 |
| 12-01 | Gp3 | g.chr20:61341075C>A  | Missense Mutation | NTSR1  | p.H172Q  | neurotensin receptor 1                       | 126 (0.00) | 73 (0.29)  | 0.77 |
| 12-01 | Gp3 | g.chr6:17675580G>A   | Silent            | NUP153 | p.N201N  | nucleoporin 153kDa                           | 46 (0.00)  | 12 (0.75)  | 2.00 |
| 12-01 | Gp3 | g.chr9:131756722G>T  | Splice Site       | NUP188 |          | nucleoporin 188kDa                           | 52 (0.00)  | 38 (0.32)  | 0.84 |
| 12-01 | Gp3 | g.chr15:34648513G>C  | Missense Mutation | NUTM1  | p.E768D  | NUT midline carcinoma                        | 151 (0.00) | 82 (0.15)  | 0.39 |
| 12-01 | Gp3 | g.chr1:228471276G>T  | Missense Mutation | OBSCN  | p.C3366F | obscurin, cytoskeletal domain 6              | 69 (0.00)  | 130 (0.16) | 0.43 |
| 12-01 | Gp3 | g.chr1:228491480C>A  | Silent            | OBSCN  | p.R4615R | obscurin, cytoskeletal domain 12             | 124 (0.00) | 114 (0.15) | 0.40 |
| 12-01 | Gp3 | g.chr2:220418334C>T  | Missense Mutation | OBSL1  | p.E1651K | obscurin-like 1                              | 90 (0.00)  | 160 (0.21) | 0.55 |
| 12-01 | Gp3 | g.chr8:103564040G>A  | Missense Mutation | ODF1   | p.D29N   | outer dense fiber of sperm                   | 86 (0.00)  | 35 (0.49)  | 1.30 |
| 12-01 | Gp3 | g.chr8:103564067G>A  | Missense Mutation | ODF1   | p.D38N   | outer dense fiber of sperm                   | 104 (0.00) | 36 (0.28)  | 0.74 |
| 12-01 | Gp3 | g.chr9:107380179G>A  | Missense Mutation | OR13C9 | p.L103F  | olfactory receptor, family 13C               | 144 (0.00) | 59 (0.17)  | 0.45 |
| 12-01 | Gp3 | g.chr9:125512165C>A  | Missense Mutation | OR1L6  | p.F13L   | olfactory receptor, family 1L                | 422 (0.00) | 154 (0.16) | 0.42 |
| 12-01 | Gp3 | g.chr11:6007591G>A   | Silent            | OR52L1 | p.T190T  | olfactory receptor, family 52L               | 200 (0.00) | 159 (0.26) | 0.69 |
| 12-01 | Gp3 | g.chr11:55563529C>T  | Silent            | OR5D14 | p.L166L  | olfactory receptor, family 5D                | 126 (0.00) | 29 (0.31)  | 0.83 |
| 12-01 | Gp3 | g.chr11:124253192T>A | Silent            | OR8B2  | p.G16G   | olfactory receptor, family 8B                | 87 (0.00)  | 53 (0.26)  | 0.70 |
| 12-01 | Gp3 | g.chr11:124266460G>A | Missense Mutation | OR8B3  | p.S263F  | olfactory receptor, family 8B                | 39 (0.00)  | 21 (0.24)  | 0.63 |
| 12-01 | Gp3 | g.chr2:241078677G>T  | Nonsense Mutation | OTOS   | p.Y60*   | otospiralin                                  | 61 (0.00)  | 86 (0.17)  | 0.66 |
| 12-01 | Gp3 | g.chr8:101716543C>A  | Missense Mutation | PABPC1 | p.G632C  | poly(A) binding protein, cytoplasmic         | 251 (0.00) | 60 (0.17)  | 0.44 |
| 12-01 | Gp3 | g.chr4:79856274C>T   | Splice Site       | PAQR3  |          | progesterin and adiponectin receptor 3       | 53 (0.00)  | 11 (0.45)  | 1.21 |

|       |     |                     |                   |         |          |                                                          |            |      |
|-------|-----|---------------------|-------------------|---------|----------|----------------------------------------------------------|------------|------|
| 12-01 | Gp3 | g.chr16:3021827G>C  | Missense Mutation | PAQR4   | p.D160H  | progesterin and adiponectin receptor 27 (0.00)           | 84 (0.17)  | 0.44 |
| 12-01 | Gp3 | g.chr4:30725888C>G  | Nonsense Mutation | PCDH7   | p.Y948*  | protocadherin 7 148 (0.01)                               | 25 (0.24)  | 0.64 |
| 12-01 | Gp3 | g.chr4:30725902C>A  | Missense Mutation | PCDH7   | p.T953N  | protocadherin 7 164 (0.01)                               | 24 (0.25)  | 0.67 |
| 12-01 | Gp3 | g.chr5:140626553C>A | Missense Mutation | PCDHB15 | p.H469Q  | protocadherin beta 15 67 (0.00)                          | 37 (0.22)  | 0.58 |
| 12-01 | Gp3 | g.chr5:140614250C>A | RNA               | PCDHB18 |          | protocadherin beta 18 p=45 (0.00)                        | 12 (0.58)  | 1.56 |
| 12-01 | Gp3 | g.chr5:140482140C>A | Missense Mutation | PCDHB3  | p.A636D  | protocadherin beta 3 67 (0.00)                           | 37 (0.19)  | 0.50 |
| 12-01 | Gp3 | g.chr5:140745656C>A | Missense Mutation | PCDHGA5 | p.L587M  | protocadherin gamma subunit 17 (0.00)                    | 38 (0.21)  | 0.56 |
| 12-01 | Gp3 | g.chr5:140864852G>T | Nonsense Mutation | PCDHGC4 | p.E38*   | protocadherin gamma subunit 48 (0.00)                    | 58 (0.16)  | 0.41 |
| 12-01 | Gp3 | g.chr5:140866177C>A | Silent            | PCDHGC4 | p.A479A  | protocadherin gamma subunit 86 (0.00)                    | 39 (0.15)  | 0.41 |
| 12-01 | Gp3 | g.chr7:82584108T>A  | Missense Mutation | PCLO    | p.E2054V | piccolo presynaptic cytoskeleton 58 (0.00)               | 25 (0.20)  | 0.53 |
| 12-01 | Gp3 | g.chr11:72299946G>C | Missense Mutation | PDE2A   | p.Q318E  | phosphodiesterase 2A, cytosolic 29 (0.00)                | 27 (0.22)  | 0.59 |
| 12-01 | Gp3 | g.chr5:149504373G>T | Missense Mutation | PDGFRB  | p.A610D  | platelet-derived growth factor receptor beta 37 (0.00)   | 50 (0.16)  | 0.43 |
| 12-01 | Gp3 | g.chr4:39868480C>G  | Splice Site       | PDS5A   |          | PDS5, regulator of cohesin 34 (0.00)                     | 18 (0.33)  | 0.89 |
| 12-01 | Gp3 | g.chr17:4585825T>A  | Missense Mutation | PELP1   | p.Y205F  | proline, glutamate and leucine aminopeptidase 175 (0.00) | 87 (0.21)  | 0.55 |
| 12-01 | Gp3 | g.chr11:61017249G>T | Missense Mutation | PGA5    | p.Q294H  | pepsinogen 5, group I (pepsinogen 5) 231 (0.00)          | 158 (0.16) | 0.42 |
| 12-01 | Gp3 | g.chr6:49753804C>A  | Missense Mutation | PGK2    | p.G366V  | phosphoglycerate kinase 23 (0.00)                        | 16 (0.31)  | 0.83 |
| 12-01 | Gp3 | g.chr18:60434916G>T | Intron            | PHLPP1  |          | PH domain and leucine-rich repeat domain 44 (0.00)       | 39 (0.28)  | 0.75 |
| 12-01 | Gp3 | g.chr18:60520230G>A | Intron            | PHLPP1  |          | PH domain and leucine-rich repeat domain 143 (0.00)      | 115 (0.16) | 0.42 |
| 12-01 | Gp3 | g.chr18:60550539G>A | Intron            | PHLPP1  |          | PH domain and leucine-rich repeat domain 149 (0.00)      | 40 (0.23)  | 0.60 |
| 12-01 | Gp3 | g.chr18:60640195C>T | Intron            | PHLPP1  |          | PH domain and leucine-rich repeat domain 205 (0.00)      | 59 (0.69)  | 1.85 |
| 12-01 | Gp3 | g.chr11:581545C>A   | Silent            | PHRF1   | p.A11A   | PHD and ring finger domain 66 (0.00)                     | 90 (0.14)  | 0.39 |
| 12-01 | Gp3 | g.chr1:151274741C>A | Silent            | PI4KB   | p.P503P  | phosphatidylinositol 4-kinase class B 178 (0.00)         | 43 (0.23)  | 0.62 |
| 12-01 | Gp3 | g.chr17:34893379T>A | Silent            | PIGW    | p.A143A  | phosphatidylinositol glycerol phosphatase 197 (0.00)     | 23 (0.78)  | 2.09 |
| 12-01 | Gp3 | g.chr1:204409429C>A | Missense Mutation | PIK3C2B | p.Q1090H | phosphatidylinositol-4-phosphatase 151 (0.00)            | 20 (0.30)  | 0.80 |
| 12-01 | Gp3 | g.chr5:67569288C>T  | Silent            | PIK3R1  | p.L135L  | phosphoinositide-3-kinase class III 50 (0.00)            | 35 (0.69)  | 1.83 |
| 12-01 | Gp3 | g.chr15:42374482G>T | Missense Mutation | PLA2G4D | p.P260T  | phospholipase A2, group I 194 (0.00)                     | 43 (0.21)  | 0.56 |
| 12-01 | Gp3 | g.chr15:42276721G>A | Silent            | PLA2G4E | p.L767L  | phospholipase A2, group II 289 (0.00)                    | 176 (0.15) | 0.39 |
| 12-01 | Gp3 | g.chr16:81944217G>T | Missense Mutation | PLCG2   | p.S609I  | phospholipase C, gamma 178 (0.00)                        | 91 (0.34)  | 0.40 |
| 12-01 | Gp3 | g.chr17:4718809A>T  | Missense Mutation | PLD2    | p.E404D  | phospholipase D2 287 (0.00)                              | 123 (0.24) | 0.65 |
| 12-01 | Gp3 | g.chr6:151161377G>A | Missense Mutation | PLEKHG1 | p.R1168Q | pleckstrin homology domain 70 (0.01)                     | 27 (0.67)  | 1.78 |
| 12-01 | Gp3 | g.chr2:43937144C>T  | Missense Mutation | PLEKHH2 | p.S661F  | pleckstrin homology domain 280 (0.00)                    | 111 (0.24) | 0.65 |
| 12-01 | Gp3 | g.chr6:161128774G>A | Missense Mutation | PLG     | p.M76I   | plasminogen 37 (0.00)                                    | 63 (0.37)  | 0.97 |
| 12-01 | Gp3 | g.chr7:131844284G>A | Silent            | PLXNA4  | p.I1536I | plexin A4 226 (0.00)                                     | 51 (0.25)  | 0.68 |
| 12-01 | Gp3 | g.chr14:39645351G>T | Silent            | PNN     | p.L61L   | pinin, desmosome associated 124 (0.00)                   | 38 (0.18)  | 0.49 |
| 12-01 | Gp3 | g.chr7:108154879C>G | Splice Site       | PNPLA8  |          | patatin-like phospholipase 48 (0.00)                     | 38 (0.21)  | 0.56 |

|       |     |                      |                   |          |          |                          |             |            |      |
|-------|-----|----------------------|-------------------|----------|----------|--------------------------|-------------|------------|------|
| 12-01 | Gp3 | g.chr1:166818232C>T  | Missense Mutation | POGK     | p.S139F  | pogo transposable elem   | 307 (0.00)  | 133 (0.15) | 0.40 |
| 12-01 | Gp3 | g.chr8:43173753A>T   | RNA               | POTEA    |          | POTE ankyrin domain f    | 35 (0.00)   | 13 (0.85)  | 2.26 |
| 12-01 | Gp3 | g.chr12:51589884C>A  | Missense Mutation | POU6F1   | p.V40F   | POU class 6 homeobox     | 50 (0.00)   | 31 (0.16)  | 0.43 |
| 12-01 | Gp3 | g.chr18:9557302G>T   | Missense Mutation | PPP4R1   | p.L703M  | protein phosphatase 4, r | 89 (0.00)   | 13 (0.38)  | 1.03 |
| 12-01 | Gp3 | g.chr8:69032499C>A   | Silent            | PREX2    | p.L1191L | phosphatidylinositol-3,  | 439 (0.00)  | 12 (0.75)  | 2.00 |
| 12-01 | Gp3 | g.chr12:49398911G>A  | Missense Mutation | PRKAG1   | p.T116I  | protein kinase, AMP-ac   | 126 (0.00)  | 14 (0.50)  | 1.33 |
| 12-01 | Gp3 | g.chr21:48071884G>A  | Missense Mutation | PRMT2    | p.G274D  | protein arginine methyl  | 149 (0.01)  | 154 (0.21) | 0.75 |
| 12-01 | Gp3 | g.chr14:75323582G>T  | Silent            | PROX2    | p.P510P  | prospero homeobox 2      | 109 (0.00)  | 45 (0.60)  | 1.60 |
| 12-01 | Gp3 | g.chr14:75323583G>T  | Missense Mutation | PROX2    | p.P510H  | prospero homeobox 2      | 111 (0.00)  | 45 (0.60)  | 1.60 |
| 12-01 | Gp3 | g.chr10:13647645G>T  | Missense Mutation | PRPF18   | p.L88F   | pre-mRNA processing f    | 73 (0.00)   | 93 (0.24)  | 0.63 |
| 12-01 | Gp3 | g.chr7:18067083G>T   | Missense Mutation | PRPS1L1  | p.S108Y  | phosphoribosyl pyropho   | 256 (0.00)  | 65 (0.17)  | 0.45 |
| 12-01 | Gp3 | g.chr16:31143612C>A  | Missense Mutation | PRSS8    | p.W250C  | protease, serine, 8      | 15 (0.00)   | 39 (0.13)  | 0.42 |
| 12-01 | Gp3 | g.chr9:79325463C>T   | Missense Mutation | PRUNE2   | p.S576N  | prune homolog 2 (Drosc   | 81 (0.00)   | 11 (0.45)  | 1.21 |
| 12-01 | Gp3 | g.chr9:79328500T>C   | Silent            | PRUNE2   | p.E298E  | prune homolog 2 (Drosc   | 54 (0.00)   | 21 (0.24)  | 0.63 |
| 12-01 | Gp3 | g.chr4:7435328A>G    | Missense Mutation | PSAPL1   | p.C427R  | prosaposin-like 1 (gene/ | 48 (0.00)   | 75 (0.15)  | 0.39 |
| 12-01 | Gp3 | g.chr4:7436229C>G    | Silent            | PSAPL1   | p.P126P  | prosaposin-like 1 (gene/ | 27 (0.00)   | 35 (0.14)  | 0.38 |
| 12-01 | Gp3 | g.chr10:104176528C>A | Missense Mutation | PSD      | p.G90W   | pleckstrin and Sec7 dor  | 26 (0.00)   | 28 (0.21)  | 0.57 |
| 12-01 | Gp3 | g.chr5:139222055C>A  | Missense Mutation | PSD2     | p.T771N  | pleckstrin and Sec7 dor  | 91 (0.00)   | 57 (0.18)  | 0.47 |
| 12-01 | Gp3 | g.chr19:43258539G>A  | Missense Mutation | PSG8     | p.R397C  | pregnancy specific beta- | 36 (0.00)   | 28 (0.64)  | 1.71 |
| 12-01 | Gp3 | g.chrX:107330994C>T  | Missense Mutation | PSMD10   | p.G150D  | proteasome (prosome, n   | 64 (0.00)   | 32 (0.78)  | 1.30 |
| 12-01 | Gp3 | g.chr10:29710429G>A  | RNA               | PTCHD3P1 |          | patched domain contain   | 28 (0.00)   | 38 (0.24)  | 0.63 |
| 12-01 | Gp3 | g.chr8:27278239C>T   | Missense Mutation | PTK2B    | p.T150M  | protein tyrosine kinase  | 2187 (0.00) | 39 (0.21)  | 0.55 |
| 12-01 | Gp3 | g.chr7:77186657C>A   | Intron            | PTPN12   |          | protein tyrosine phosph  | 307 (0.00)  | 80 (0.34)  | 0.90 |
| 12-01 | Gp3 | g.chr15:75772216G>A  | Nonsense Mutation | PTPN9    | p.Q368*  | protein tyrosine phosph  | 77 (0.01)   | 22 (0.36)  | 0.97 |
| 12-01 | Gp3 | g.chr19:55711800G>A  | Silent            | PTPRH    | p.V408V  | protein tyrosine phosph  | 44 (0.00)   | 27 (0.26)  | 0.69 |
| 12-01 | Gp3 | g.chr2:220160947C>T  | Splice Site       | PTPRN    |          | protein tyrosine phosph  | 78 (0.00)   | 53 (0.17)  | 0.45 |
| 12-01 | Gp3 | g.chr2:220167475C>A  | Missense Mutation | PTPRN    | p.Q154H  | protein tyrosine phosph  | 75 (0.00)   | 60 (0.17)  | 0.44 |
| 12-01 | Gp3 | g.chr19:5210584G>T   | Missense Mutation | PTPRS    | p.P1795T | protein tyrosine phosph  | 35 (0.00)   | 139 (0.17) | 0.46 |
| 12-01 | Gp3 | g.chr11:125765836C>T | Missense Mutation | PUS3     | p.G115E  | pseudouridylate synthas  | 116 (0.00)  | 66 (0.29)  | 0.77 |
| 12-01 | Gp3 | g.chr10:99967948G>A  | Missense Mutation | R3HCC1L  | p.R26K   | R3H domain and coiled-   | 20 (0.00)   | 29 (0.21)  | 0.55 |
| 12-01 | Gp3 | g.chr15:66170242G>A  | Missense Mutation | RAB11A   | p.D127N  | RAB11A, member RAS       | 70 (0.00)   | 24 (0.25)  | 0.67 |
| 12-01 | Gp3 | g.chr15:66170275G>A  | Missense Mutation | RAB11A   | p.E138K  | RAB11A, member RAS       | 75 (0.00)   | 21 (0.24)  | 0.63 |
| 12-01 | Gp3 | g.chr1:156039504C>T  | Missense Mutation | RAB25    | p.S159F  | RAB25, member RAS c      | 50 (0.00)   | 50 (0.24)  | 0.64 |
| 12-01 | Gp3 | g.chr19:11448054G>A  | Nonsense Mutation | RAB3D    | p.Q8*    | RAB3D, member RAS c      | 183 (0.00)  | 98 (0.17)  | 0.46 |
| 12-01 | Gp3 | g.chr2:114399664C>G  | Missense Mutation | RABL2A   | p.S215R  | RAB, member of RAS c     | 80 (0.00)   | 31 (0.26)  | 0.69 |

|       |     |                      |                   |               |          |                           |            |            |      |
|-------|-----|----------------------|-------------------|---------------|----------|---------------------------|------------|------------|------|
| 12-01 | Gp3 | g.chr17:33430524C>A  | Missense Mutation | RAD51D        | p.D206Y  | RAD51 paralog D           | 26 (0.00)  | 28 (0.25)  | 0.67 |
| 12-01 | Gp3 | g.chr20:37154645G>T  | Missense Mutation | RALGAPB       | p.L670F  | Ral GTPase activating p53 | 53 (0.00)  | 27 (0.30)  | 0.79 |
| 12-01 | Gp3 | g.chr2:109383844G>A  | Silent            | RANBP2        | p.K2283K | RAN binding protein 2     | 121 (0.00) | 25 (0.20)  | 0.53 |
| 12-01 | Gp3 | g.chr19:5941661G>A   | Missense Mutation | RANBP3        | p.S126F  | RAN binding protein 3     | 76 (0.00)  | 115 (0.23) | 0.63 |
| 12-01 | Gp3 | g.chr6:13657431C>G   | Missense Mutation | RANBP9        | p.G272R  | RAN binding protein 9     | 42 (0.00)  | 33 (0.27)  | 0.73 |
| 12-01 | Gp3 | g.chr12:48143207C>T  | Missense Mutation | RAPGEF3       | p.R336H  | Rap guanine nucleotide    | 46 (0.02)  | 37 (0.27)  | 0.72 |
| 12-01 | Gp3 | g.chr11:63304344G>T  | Missense Mutation | RARRES3       | p.A2S    | retinoic acid receptor re | 53 (0.00)  | 12 (0.42)  | 1.11 |
| 12-01 | Gp3 | g.chr11:64497272T>A  | Splice Site       | RASGRP2       |          | RAS guanyl releasing p    | 54 (0.00)  | 55 (0.36)  | 0.97 |
| 12-01 | Gp3 | g.chr17:9801464C>T   | Missense Mutation | RCVRN         | p.R184Q  | recoverin                 | 388 (0.00) | 149 (0.44) | 1.16 |
| 12-01 | Gp3 | g.chr7:103155642G>A  | Silent            | RELN          | p.D2703D | reelin                    | 94 (0.00)  | 50 (0.22)  | 0.59 |
| 12-01 | Gp3 | g.chr7:103155675G>A  | Silent            | RELN          | p.V2692V | reelin                    | 94 (0.00)  | 47 (0.15)  | 0.40 |
| 12-01 | Gp3 | g.chr6:111694907A>T  | Missense Mutation | REV3L         | p.L1551I | REV3-like, polymerase     | 40 (0.00)  | 23 (0.22)  | 0.58 |
| 12-01 | Gp3 | g.chr22:29834904G>A  | Missense Mutation | RFPL1         | p.V42I   | ret finger protein-like 1 | 82 (0.00)  | 11 (0.55)  | 1.45 |
| 12-01 | Gp3 | g.chr2:113146807C>A  | Missense Mutation | RGPD8         | p.A1099S | RANBP2-like and GRIIF     | 173 (0.00) | 44 (0.18)  | 0.48 |
| 12-01 | Gp3 | g.chr12:107208831G>A | Missense Mutation | RIC8B         | p.D164N  | RIC8 guanine nucleotide   | 36 (0.00)  | 21 (0.43)  | 1.14 |
| 12-01 | Gp3 | g.chr1:41094961C>A   | Missense Mutation | RIMS3         | p.G186C  | regulating synaptic men   | 152 (0.00) | 61 (0.15)  | 0.39 |
| 12-01 | Gp3 | g.chr9:5335448C>A    | Missense Mutation | RLN1          | p.D121Y  | relaxin 1                 | 71 (0.00)  | 74 (0.41)  | 1.08 |
| 12-01 | Gp3 | g.chr9:116060414C>A  | Missense Mutation | RNF183        | p.W17C   | ring finger protein 183   | 31 (0.00)  | 49 (0.16)  | 0.44 |
| 12-01 | Gp3 | g.chr1:33407878A>G   | Missense Mutation | RNF19B        | p.S530P  | ring finger protein 19B   | 84 (0.00)  | 48 (0.23)  | 0.61 |
| 12-01 | Gp3 | g.chr7:5662524C>A    | Missense Mutation | RNF216        | p.M913I  | ring finger protein 216   | 38 (0.00)  | 105 (0.15) | 0.41 |
| 12-01 | Gp3 | g.chr1:45115366G>A   | Silent            | RNF220        | p.E493E  | ring finger protein 220   | 161 (0.00) | 48 (0.29)  | 0.78 |
| 12-01 | Gp3 | g.chr12:56604352C>A  | Splice Site       | RNF41         | p.A31S   | ring finger protein 41, E | 24 (0.00)  | 26 (0.19)  | 0.51 |
| 12-01 | Gp3 | g.chr1:172955526C>T  | lincRNA           | RP1-15D23.2   |          |                           | 33 (0.00)  | 25 (0.20)  | 0.53 |
| 12-01 | Gp3 | g.chr8:84932238C>G   | lincRNA           | RP11-120I21.2 |          |                           | 20 (0.00)  | 24 (0.21)  | 0.56 |
| 12-01 | Gp3 | g.chr9:67293622C>A   | RNA               | RP11-236F9.2  |          |                           | 116 (0.00) | 33 (0.15)  | 0.40 |
| 12-01 | Gp3 | g.chr2:74588656C>T   | Silent            | RP11-287D1.3  | p.L182L  |                           | 46 (0.00)  | 41 (0.24)  | 0.65 |
| 12-01 | Gp3 | g.chr16:30309884C>A  | RNA               | RP11-347C12.2 |          |                           | 79 (0.00)  | 27 (0.19)  | 0.49 |
| 12-01 | Gp3 | g.chr3:125509447C>A  | lincRNA           | RP11-379B18.6 |          |                           | 70 (0.00)  | 75 (0.21)  | 0.57 |
| 12-01 | Gp3 | g.chr16:59041137G>A  | lincRNA           | RP11-410D17.2 |          |                           | 29 (0.00)  | 12 (0.42)  | 1.11 |
| 12-01 | Gp3 | g.chr17:20449242G>A  | lincRNA           | RP11-434D2.3  |          |                           | 59 (0.00)  | 26 (0.19)  | 0.51 |
| 12-01 | Gp3 | g.chr3:196043072G>A  | Silent            | RP11-447L10.1 | p.I48I   |                           | 50 (0.00)  | 13 (0.46)  | 1.23 |
| 12-01 | Gp3 | g.chr1:145381782G>T  | lincRNA           | RP11-458D21.1 |          |                           | 47 (0.00)  | 37 (0.22)  | 0.58 |
| 12-01 | Gp3 | g.chr11:49747451G>T  | RNA               | RP11-707M1.1  |          |                           | 28 (0.00)  | 29 (0.17)  | 0.46 |
| 12-01 | Gp3 | g.chr14:47120402C>A  | Nonsense Mutation | RPL10L        | p.E180*  | ribosomal protein L10-li  | 144 (0.00) | 29 (0.17)  | 0.46 |
| 12-01 | Gp3 | g.chr22:39710730C>A  | Silent            | RPL3          | p.G270G  | ribosomal protein L3      | 27 (0.00)  | 40 (0.15)  | 0.40 |

|       |     |                     |                   |          |          |                                   |            |            |      |
|-------|-----|---------------------|-------------------|----------|----------|-----------------------------------|------------|------------|------|
| 12-01 | Gp3 | g.chr6:166836783G>T | Silent            | RPS6KA2  | p.L479L  | ribosomal protein S6 kir44 (0.00) | 52 (0.17)  | 0.46       |      |
| 12-01 | Gp3 | g.chr12:66152204G>A | RNA               | RPSAP52  |          | ribosomal protein SA ps30 (0.00)  | 14 (0.43)  | 1.14       |      |
| 12-01 | Gp3 | g.chr8:108970322C>A | Missense Mutation | RSPO2    | p.R201M  | R-spondin 2                       | 65 (0.00)  | 33 (0.58)  | 1.54 |
| 12-01 | Gp3 | g.chr8:108970358G>A | Missense Mutation | RSPO2    | p.T189I  | R-spondin 2                       | 62 (0.00)  | 30 (0.87)  | 2.31 |
| 12-01 | Gp3 | g.chr14:60074113C>G | Silent            | RTN1     | p.V38V   | reticulon 1                       | 28 (0.00)  | 31 (0.16)  | 0.43 |
| 12-01 | Gp3 | g.chr3:72437543C>G  | Intron            | RYBP     |          | RING1 and YY1 bindin              | 122 (0.00) | 26 (0.81)  | 2.15 |
| 12-01 | Gp3 | g.chr3:72459763C>T  | Intron            | RYBP     |          | RING1 and YY1 bindin              | 83 (0.00)  | 93 (0.26)  | 0.69 |
| 12-01 | Gp3 | g.chr3:72459871G>A  | Intron            | RYBP     |          | RING1 and YY1 bindin              | 58 (0.00)  | 70 (0.23)  | 0.61 |
| 12-01 | Gp3 | g.chr19:38980901C>A | Silent            | RYR1     | p.S2000S | ryanodine receptor 1 (sk33 (0.00) | 28 (0.18)  | 0.48       |      |
| 12-01 | Gp3 | g.chr16:51171162G>A | Missense Mutation | SALL1    | p.T1279M | spalt-like transcription f        | 188 (0.00) | 110 (0.26) | 0.70 |
| 12-01 | Gp3 | g.chr5:133942752C>G | Missense Mutation | SAR1B    | p.S162T  | secretion associated, Ra:         | 117 (0.00) | 23 (0.30)  | 0.81 |
| 12-01 | Gp3 | g.chr19:1119568G>A  | Silent            | SBNO2    | p.G440G  | strawberry notch homol            | 15 (0.00)  | 37 (0.22)  | 0.58 |
| 12-01 | Gp3 | g.chr15:76646419C>A | Missense Mutation | SCAPER   | p.Q1306H | S-phase cyclin A-associ           | 142 (0.00) | 235 (0.15) | 0.40 |
| 12-01 | Gp3 | g.chr4:54140068G>T  | Silent            | SCFD2    | p.A412A  | sec1 family domain con            | 58 (0.00)  | 27 (0.48)  | 1.28 |
| 12-01 | Gp3 | g.chr2:224463986C>A | Missense Mutation | SCG2     | p.K5N    | secretogranin II                  | 105 (0.00) | 27 (0.33)  | 0.89 |
| 12-01 | Gp3 | g.chr17:62018427G>A | Missense Mutation | SCN4A    | p.R1739C | sodium channel, voltage           | 123 (0.00) | 173 (0.53) | 1.40 |
| 12-01 | Gp3 | g.chr2:167298231G>A | Missense Mutation | SCN7A    | p.P611L  | sodium channel, voltage           | 23 (0.00)  | 32 (0.34)  | 0.92 |
| 12-01 | Gp3 | g.chr11:9069506G>C  | Missense Mutation | SCUBE2   | p.N593K  | signal peptide, CUB dor           | 203 (0.00) | 126 (0.18) | 0.49 |
| 12-01 | Gp3 | g.chr2:192701174G>A | Silent            | SDPR     | p.I251I  | serum deprivation respo           | 151 (0.00) | 69 (0.22)  | 0.58 |
| 12-01 | Gp3 | g.chr9:139369422G>T | Missense Mutation | SEC16A   | p.N704K  | SEC16 homolog A (S. c             | 163 (0.00) | 109 (0.20) | 0.54 |
| 12-01 | Gp3 | g.chr1:177934200T>A | Missense Mutation | SEC16B   | p.N172I  | SEC16 homolog B (S. c             | 108 (0.00) | 33 (0.24)  | 0.65 |
| 12-01 | Gp3 | g.chr1:169582205G>A | Missense Mutation | SELP     | p.A246V  | selectin P (granule mem           | 30 (0.00)  | 24 (0.75)  | 2.00 |
| 12-01 | Gp3 | g.chr14:94849047C>A | Missense Mutation | SERPINA1 | p.E176D  | serpin peptidase inhibi           | 88 (0.00)  | 54 (0.26)  | 0.69 |
| 12-01 | Gp3 | g.chr22:26692864T>C | Missense Mutation | SEZ6L    | p.V327A  | seizure related 6 homol           | 70 (0.00)  | 22 (0.27)  | 0.73 |
| 12-01 | Gp3 | g.chr1:162367101C>T | Missense Mutation | SH2D1B   | p.S123N  | SH2 domain containing             | 25 (0.04)  | 16 (0.75)  | 2.00 |
| 12-01 | Gp3 | g.chr11:70319127G>A | Silent            | SHANK2   | p.N1203N | SH3 and multiple ankyr            | 39 (0.00)  | 21 (0.33)  | 0.89 |
| 12-01 | Gp3 | g.chr17:18238886G>T | Missense Mutation | SHMT1    | p.N306K  | serine hydroxymethyltra           | 174 (0.00) | 20 (0.55)  | 1.47 |
| 12-01 | Gp3 | g.chr12:57626052G>A | Missense Mutation | SHMT2    | p.E191K  | serine hydroxymethyltra           | 95 (0.00)  | 49 (0.14)  | 0.38 |
| 12-01 | Gp3 | g.chr3:72841297G>A  | Intron            | SHQ1     |          | SHQ1, H/ACA ribonucl              | 44 (0.00)  | 24 (0.46)  | 1.22 |
| 12-01 | Gp3 | g.chr3:72861294G>A  | Intron            | SHQ1     |          | SHQ1, H/ACA ribonucl              | 132 (0.01) | 32 (0.28)  | 0.75 |
| 12-01 | Gp3 | g.chr5:132159863C>T | Missense Mutation | SHROOM1  | p.S497N  | shroom family member              | 117 (0.01) | 52 (0.29)  | 0.77 |
| 12-01 | Gp3 | g.chr19:51769078G>T | Missense Mutation | SIGLECL1 | p.G118C  | SIGLEC family like 1              | 202 (0.00) | 18 (0.44)  | 1.19 |
| 12-01 | Gp3 | g.chr14:72117064C>T | Nonsense Mutation | SIPA1L1  | p.Q611*  | signal-induced prolifera          | 223 (0.00) | 24 (0.54)  | 1.44 |
| 12-01 | Gp3 | g.chr1:232650844G>A | Missense Mutation | SIPA1L2  | p.S81F   | signal-induced prolifera          | 109 (0.00) | 27 (0.22)  | 0.59 |
| 12-01 | Gp3 | g.chr19:38643554C>A | Missense Mutation | SIPA1L3  | p.S1203Y | signal-induced prolifera          | 15 (0.00)  | 49 (0.31)  | 0.82 |

|       |     |                      |                   |           |          |                              |             |            |      |
|-------|-----|----------------------|-------------------|-----------|----------|------------------------------|-------------|------------|------|
| 12-01 | Gp3 | g.chr10:69651254C>T  | Missense Mutation | SIRT1     | p.A295V  | sirtuin 1                    | 191 (0.00)  | 71 (0.23)  | 0.60 |
| 12-01 | Gp3 | g.chr3:170078687C>G  | Missense Mutation | SKIL      | p.L170V  | SKI-like proto-oncogene      | 36 (0.00)   | 19 (0.26)  | 0.70 |
| 12-01 | Gp3 | g.chr8:42294731G>T   | Nonsense Mutation | SLC20A2   | p.Y433*  | solute carrier family 20     | 57 (0.00)   | 67 (0.15)  | 0.40 |
| 12-01 | Gp3 | g.chr6:160828158G>A  | Missense Mutation | SLC22A3   | p.V207M  | solute carrier family 22     | 33 (0.00)   | 28 (0.36)  | 0.95 |
| 12-01 | Gp3 | g.chr17:78210806A>T  | Silent            | SLC26A11  | p.L272L  | solute carrier family 26     | 71 (0.00)   | 119 (0.17) | 0.45 |
| 12-01 | Gp3 | g.chr1:9083102C>A    | Missense Mutation | SLC2A7    | p.E62D   | solute carrier family 2      | 1145 (0.00) | 60 (0.17)  | 0.44 |
| 12-01 | Gp3 | g.chr4:25678140C>A   | Missense Mutation | SLC34A2   | p.F614L  | solute carrier family 34     | 52 (0.00)   | 33 (0.24)  | 0.65 |
| 12-01 | Gp3 | g.chr21:43987130C>A  | Missense Mutation | SLC37A1   | p.P436T  | solute carrier family 37     | 26 (0.00)   | 42 (0.19)  | 0.51 |
| 12-01 | Gp3 | g.chr3:50255458G>C   | RNA               | SLC38A3   |          | solute carrier family 38, 49 | 0 (0.00)    | 55 (0.15)  | 0.39 |
| 12-01 | Gp3 | g.chr17:19470102G>A  | Splice Site       | SLC47A1   |          | solute carrier family 47     | 136 (0.01)  | 52 (0.25)  | 0.67 |
| 12-01 | Gp3 | g.chr19:33324146C>T  | Silent            | SLC7A9    | p.E436E  | solute carrier family 7      | 65 (0.00)   | 58 (0.29)  | 0.78 |
| 12-01 | Gp3 | g.chr18:48561507G>A  | Intron            | SMAD4     |          | SMAD family member           | 84 (0.00)   | 42 (0.83)  | 2.22 |
| 12-01 | Gp3 | g.chr18:48604728G>T  | Missense Mutation | SMAD4     | p.S421I  | SMAD family member           | 73 (0.00)   | 35 (0.17)  | 0.46 |
| 12-01 | Gp3 | g.chrX:21772366G>A   | Nonsense Mutation | SMPX      | p.Q15*   | small muscle protein, X-     | 57 (0.00)   | 37 (0.46)  | 0.77 |
| 12-01 | Gp3 | g.chr2:242021191G>A  | Missense Mutation | SNED1     | p.G1339D | sushi, nidogen and EGF       | 23 (0.00)   | 89 (0.16)  | 0.60 |
| 12-01 | Gp3 | g.chr15:25427604G>A  | RNA               | SNHG14    |          | small nucleolar RNA ho       | 73 (0.00)   | 95 (0.18)  | 0.48 |
| 12-01 | Gp3 | g.chr15:25432793C>A  | RNA               | SNHG14    |          | small nucleolar RNA ho       | 277 (0.00)  | 339 (0.20) | 0.54 |
| 12-01 | Gp3 | g.chr11:130784574C>A | Nonsense Mutation | SNX19     | p.G421*  | sorting nexin 19             | 66 (0.00)   | 24 (0.29)  | 0.78 |
| 12-01 | Gp3 | g.chr11:65618614T>A  | Missense Mutation | SNX32     | p.V231D  | sorting nexin 32             | 41 (0.00)   | 57 (0.16)  | 0.42 |
| 12-01 | Gp3 | g.chr20:35443684G>T  | Missense Mutation | SOGA1     | p.Q721K  | suppressor of glucose, a     | 41 (0.02)   | 31 (0.19)  | 0.52 |
| 12-01 | Gp3 | g.chr4:7668877C>T    | Silent            | SORCS2    | p.Y366Y  | sortilin-related VPS10 d     | 143 (0.01)  | 43 (0.19)  | 0.50 |
| 12-01 | Gp3 | g.chr9:40702801C>T   | Missense Mutation | SPATA31A3 | p.A153V  | SPATA31 subfamily A,         | 305 (0.00)  | 198 (0.16) | 0.43 |
| 12-01 | Gp3 | g.chr9:43625308G>A   | Missense Mutation | SPATA31A6 | p.P1127S | SPATA31 subfamily A,         | 170 (0.00)  | 46 (0.50)  | 1.33 |
| 12-01 | Gp3 | g.chr11:74676917A>G  | Missense Mutation | SPCS2     | p.Y103C  | signal peptidase comple      | 47 (0.00)   | 25 (0.28)  | 0.75 |
| 12-01 | Gp3 | g.chr22:24761523G>C  | Missense Mutation | SPECC1L   | p.M969I  | sperm antigen with calp      | 56 (0.00)   | 28 (0.25)  | 0.67 |
| 12-01 | Gp3 | g.chr13:46288393G>A  | Silent            | SPERT     | p.K375K  | spermatid associated         | 26 (0.00)   | 29 (0.17)  | 0.46 |
| 12-01 | Gp3 | g.chr17:47705265A>C  | Intron            | SPOP      |          | speckle-type POZ protei      | 73 (0.00)   | 12 (0.42)  | 1.11 |
| 12-01 | Gp3 | g.chr1:9427513C>A    | Missense Mutation | SPSB1     | p.P234Q  | splA/ryanodine receptor      | 38 (0.00)   | 82 (0.27)  | 0.72 |
| 12-01 | Gp3 | g.chr12:109182168G>A | Silent            | SSH1      | p.L916L  | slingshot protein phosph     | 124 (0.00)  | 147 (0.20) | 0.53 |
| 12-01 | Gp3 | g.chr3:52537397G>T   | Silent            | STAB1     | p.L244L  | stabilin 1                   | 39 (0.00)   | 44 (0.20)  | 0.55 |
| 12-01 | Gp3 | g.chr17:40369412C>A  | Missense Mutation | STAT5B    | p.A414S  | signal transducer and ac     | 78 (0.00)   | 12 (0.50)  | 0.53 |
| 12-01 | Gp3 | g.chr12:57492850C>A  | Missense Mutation | STAT6     | p.G525C  | signal transducer and ac     | 125 (0.00)  | 36 (0.22)  | 0.59 |
| 12-01 | Gp3 | g.chr5:171532736A>T  | Missense Mutation | STK10     | p.V265E  | serine/threonine kinase      | 80 (0.00)   | 66 (0.18)  | 0.48 |
| 12-01 | Gp3 | g.chr4:184931376G>A  | Missense Mutation | STOX2     | p.S462N  | storkhead box 2              | 82 (0.00)   | 38 (0.18)  | 0.49 |
| 12-01 | Gp3 | g.chr7:129122825C>T  | Missense Mutation | STRIP2    | p.T731I  | striatin interacting prote   | 29 (0.00)   | 28 (0.25)  | 0.67 |

|       |     |                      |                   |                  |          |                            |            |            |      |
|-------|-----|----------------------|-------------------|------------------|----------|----------------------------|------------|------------|------|
| 12-01 | Gp3 | g.chr12:118829065G>A | Silent            | SUDS3            | p.K165K  | suppressor of defective    | 167 (0.00) | 38 (0.24)  | 0.63 |
| 12-01 | Gp3 | g.chr6:149721679G>A  | Missense Mutation | SUMO4            | p.R51Q   | small ubiquitin-like moc   | 85 (0.00)  | 48 (0.35)  | 0.94 |
| 12-01 | Gp3 | g.chr17:27005098G>T  | Missense Mutation | SUPT6H           | p.S335I  | suppressor of Ty 6 hom     | 104 (0.01) | 24 (0.42)  | 1.11 |
| 12-01 | Gp3 | g.chr6:152737726C>T  | Missense Mutation | SYNE1            | p.R1949K | spectrin repeat containi   | 206 (0.00) | 23 (0.74)  | 1.97 |
| 12-01 | Gp3 | g.chr14:64453260G>T  | Silent            | SYNE2            | p.V746V  | spectrin repeat containi   | 45 (0.00)  | 44 (0.16)  | 0.42 |
| 12-01 | Gp3 | g.chr11:61291406C>T  | Missense Mutation | SYT7             | p.R311Q  | synaptotagmin VII          | 122 (0.00) | 100 (0.29) | 0.77 |
| 12-01 | Gp3 | g.chr11:61323656G>A  | Silent            | SYT7             | p.L19L   | synaptotagmin VII          | 34 (0.00)  | 38 (0.21)  | 0.56 |
| 12-01 | Gp3 | g.chr17:35797857C>T  | Missense Mutation | TADA2A           | p.L71F   | transcriptional adaptor    | 289 (0.00) | 43 (0.16)  | 0.43 |
| 12-01 | Gp3 | g.chr3:9822170C>A    | Missense Mutation | TADA3            | p.E390D  | transcriptional adaptor    | 323 (0.00) | 43 (0.16)  | 0.43 |
| 12-01 | Gp3 | g.chr1:159889622G>T  | Missense Mutation | TAGLN2           | p.L62I   | transgelin 2               | 26 (0.00)  | 34 (0.53)  | 1.41 |
| 12-01 | Gp3 | g.chr17:61483633C>G  | Missense Mutation | TANC2            | p.A1121G | tetratricopeptide repeat,  | 218 (0.00) | 34 (0.32)  | 0.86 |
| 12-01 | Gp3 | g.chr17:58088526C>T  | lincRNA           | TBC1D3P1-DHX40P1 |          | TBC1D3P1-DHX40P1           | 183 (0.00) | 77 (0.18)  | 0.48 |
| 12-01 | Gp3 | g.chr16:30098137C>A  | Missense Mutation | TBX6             | p.G292V  | T-box 6                    | 24 (0.00)  | 21 (0.38)  | 1.02 |
| 12-01 | Gp3 | g.chr5:149755349G>T  | Missense Mutation | TCOF1            | p.Q590H  | Treacher Collins-France    | 89 (0.00)  | 109 (0.28) | 0.76 |
| 12-01 | Gp3 | g.chr19:33233721C>T  | Missense Mutation | TDRD12           | p.P119S  | tudor domain containing    | 40 (0.00)  | 44 (0.43)  | 1.15 |
| 12-01 | Gp3 | g.chr11:121023691G>A | Missense Mutation | TECTA            | p.V1403M | tectorin alpha             | 36 (0.00)  | 47 (0.53)  | 1.42 |
| 12-01 | Gp3 | g.chr17:73987605G>T  | Missense Mutation | TEN1             | p.D51Y   | TEN1 CST complex sub       | 195 (0.00) | 140 (0.19) | 0.51 |
| 12-01 | Gp3 | g.chr6:155579140G>A  | Missense Mutation | TFB1M            | p.R291W  | transcription factor B1,   | 178 (0.00) | 42 (0.45)  | 1.21 |
| 12-01 | Gp3 | g.chr11:134119730G>A | Missense Mutation | THYN1            | p.L126F  | thymocyte nuclear prote    | 36 (0.00)  | 26 (0.50)  | 1.33 |
| 12-01 | Gp3 | g.chr9:35707480T>A   | Silent            | TLN1             | p.L1546L | talin 1                    | 42 (0.00)  | 34 (0.15)  | 0.39 |
| 12-01 | Gp3 | g.chr10:98292808C>A  | Splice Site       | TM9SF3           | p.W442L  | transmembrane 9 superf     | 95 (0.00)  | 18 (0.67)  | 1.78 |
| 12-01 | Gp3 | g.chr11:66061832C>T  | Missense Mutation | TMEM151A         | p.R39C   | transmembrane protein      | 17 (0.00)  | 14 (0.43)  | 1.14 |
| 12-01 | Gp3 | g.chr6:11575678G>A   | Missense Mutation | TMEM170B         | p.G95S   | transmembrane protein      | 57 (0.00)  | 22 (0.27)  | 0.73 |
| 12-01 | Gp3 | g.chr7:150490234C>A  | Missense Mutation | TMEM176B         | p.R181L  | transmembrane protein      | 49 (0.00)  | 24 (0.21)  | 0.56 |
| 12-01 | Gp3 | g.chr16:29979483G>A  | Missense Mutation | TMEM219          | p.A165T  | transmembrane protein      | 128 (0.00) | 70 (0.14)  | 0.38 |
| 12-01 | Gp3 | g.chr11:129724538C>T | Missense Mutation | TMEM45B          | p.P71L   | transmembrane protein      | 66 (0.00)  | 13 (0.38)  | 1.03 |
| 12-01 | Gp3 | g.chr1:205052779C>A  | Missense Mutation | TMEM81           | p.V224L  | transmembrane protein      | 52 (0.00)  | 20 (0.65)  | 1.73 |
| 12-01 | Gp3 | g.chr21:42838816G>A  | Intron            | TMPRSS2          |          | transmembrane protease     | 96 (0.00)  | 77 (0.19)  | 0.52 |
| 12-01 | Gp3 | g.chr11:128806508C>T | Missense Mutation | TP53AIP1         | p.G60R   | tumor protein p53 regul    | 112 (0.01) | 56 (0.18)  | 0.48 |
| 12-01 | Gp3 | g.chr2:24300455G>T   | Silent            | TP53I3           | p.P331P  | tumor protein p53 induc    | 42 (0.00)  | 49 (0.33)  | 0.87 |
| 12-01 | Gp3 | g.chr21:45494987G>C  | Missense Mutation | TRAPPC10         | p.R418T  | trafficking protein partic | 187 (0.00) | 42 (0.14)  | 0.52 |
| 12-01 | Gp3 | g.chr7:38370227C>A   | RNA               | TRGV8            |          | T cell receptor gamma v    | 189 (0.00) | 38 (0.18)  | 0.49 |
| 12-01 | Gp3 | g.chr5:64920090C>A   | Silent            | TRIM23           | p.L4L    | tripartite motif containi  | 19 (0.00)  | 41 (0.20)  | 0.52 |
| 12-01 | Gp3 | g.chr11:119996523C>A | Missense Mutation | TRIM29           | p.E403D  | tripartite motif containi  | 27 (0.00)  | 17 (0.29)  | 0.78 |
| 12-01 | Gp3 | g.chr17:57093091C>T  | Missense Mutation | TRIM37           | p.G819D  | tripartite motif containi  | 158 (0.00) | 39 (0.15)  | 0.41 |



|       |     |                      |                   |         |          |                            |            |            |      |
|-------|-----|----------------------|-------------------|---------|----------|----------------------------|------------|------------|------|
| 12-01 | Gp3 | g.chr11:55032423G>T  | Missense Mutation | TRIM48  | p.C31F   | tripartite motif containir | 64 (0.00)  | 33 (0.33)  | 0.89 |
| 12-01 | Gp3 | g.chr11:89537510C>G  | Missense Mutation | TRIM49  | p.W43S   | tripartite motif containir | 54 (0.00)  | 27 (0.26)  | 0.69 |
| 12-01 | Gp3 | g.chr22:38120367T>A  | Missense Mutation | TRIOBP  | p.C602S  | TRIO and F-actin bindir    | 156 (0.01) | 52 (0.19)  | 0.51 |
| 12-01 | Gp3 | g.chr22:38120401C>A  | Missense Mutation | TRIOBP  | p.T613N  | TRIO and F-actin bindir    | 146 (0.00) | 28 (0.36)  | 0.95 |
| 12-01 | Gp3 | g.chr22:38121921C>G  | Missense Mutation | TRIOBP  | p.P1120A | TRIO and F-actin bindir    | 18 (0.00)  | 19 (0.32)  | 0.84 |
| 12-01 | Gp3 | g.chr2:230656782C>T  | Splice Site       | TRIP12  |          | thyroid hormone receptc    | 63 (0.00)  | 51 (0.16)  | 0.42 |
| 12-01 | Gp3 | g.chr5:901529G>T     | Missense Mutation | TRIP13  | p.R173L  | thyroid hormone receptc    | 172 (0.00) | 92 (0.18)  | 0.49 |
| 12-01 | Gp3 | g.chr8:116599252C>A  | Missense Mutation | TRPS1   | p.K892N  | trichorhinophalangeal sy   | 116 (0.00) | 99 (0.18)  | 0.48 |
| 12-01 | Gp3 | g.chr7:98586559C>T   | Silent            | TRRAP   | p.N3162N | transformation/transcrip   | 52 (0.00)  | 69 (0.17)  | 0.46 |
| 12-01 | Gp3 | g.chr7:98591177G>A   | Silent            | TRRAP   | p.Q3263Q | transformation/transcrip   | 16 (0.00)  | 48 (0.19)  | 0.50 |
| 12-01 | Gp3 | g.chr9:135781061G>A  | Missense Mutation | TSC1    | p.T635I  | tuberous sclerosis 1       | 167 (0.00) | 17 (0.29)  | 0.78 |
| 12-01 | Gp3 | g.chr9:135798868G>T  | Missense Mutation | TSC1    | p.D125E  | tuberous sclerosis 1       | 85 (0.01)  | 54 (0.26)  | 0.69 |
| 12-01 | Gp3 | g.chr18:72998899G>A  | Missense Mutation | TSHZ1   | p.A513T  | teashirt zinc finger hom   | 58 (0.00)  | 75 (0.12)  | 0.41 |
| 12-01 | Gp3 | g.chr18:73000430T>A  | Missense Mutation | TSHZ1   | p.L1023Q | teashirt zinc finger hom   | 210 (0.00) | 81 (0.16)  | 0.55 |
| 12-01 | Gp3 | g.chr7:138872248G>A  | Missense Mutation | TTC26   | p.G475S  | tetratricopeptide repeat   | 177 (0.00) | 42 (0.19)  | 0.51 |
| 12-01 | Gp3 | g.chr22:28379216C>T  | Missense Mutation | TTC28   | p.V2147M | tetratricopeptide repeat   | 73 (0.00)  | 110 (0.16) | 0.44 |
| 12-01 | Gp3 | g.chr14:20770017G>A  | Silent            | TTC5    | p.T53T   | tetratricopeptide repeat   | 93 (0.00)  | 36 (0.22)  | 0.59 |
| 12-01 | Gp3 | g.chr14:91113307G>T  | Silent            | TTC7B   | p.A526A  | tetratricopeptide repeat   | 218 (0.00) | 41 (0.24)  | 0.65 |
| 12-01 | Gp3 | g.chr14:91113315G>T  | Missense Mutation | TTC7B   | p.Q524K  | tetratricopeptide repeat   | 222 (0.00) | 43 (0.30)  | 0.81 |
| 12-01 | Gp3 | g.chr14:91113318G>T  | Missense Mutation | TTC7B   | p.L523M  | tetratricopeptide repeat   | 220 (0.00) | 44 (0.20)  | 0.55 |
| 12-01 | Gp3 | g.chr22:43447846G>A  | Silent            | TTLL1   | p.D313D  | tubulin tyrosine ligase-li | 73 (0.00)  | 140 (0.14) | 0.38 |
| 12-01 | Gp3 | g.chr2:179588737C>A  | Missense Mutation | TTN     | p.K7083N | titin                      | 73 (0.00)  | 29 (0.34)  | 0.92 |
| 12-01 | Gp3 | g.chr19:54942359G>T  | Missense Mutation | TTYH1   | p.S372I  | tweety family member       | 117 (0.00) | 50 (0.20)  | 0.53 |
| 12-01 | Gp3 | g.chr6:158902276C>A  | Silent            | TULP4   | p.R481R  | tubby like protein 4       | 35 (0.00)  | 70 (0.20)  | 0.53 |
| 12-01 | Gp3 | g.chr8:15605909G>A   | Silent            | TUSC3   | p.L321L  | tumor suppressor candic    | 39 (0.00)  | 19 (0.32)  | 0.84 |
| 12-01 | Gp3 | g.chr16:11785415T>C  | Missense Mutation | TXNDC11 | p.D544G  | thioredoxin domain con     | 100 (0.00) | 63 (0.21)  | 0.55 |
| 12-01 | Gp3 | g.chr15:41865963C>A  | Nonsense Mutation | TYRO3   | p.Y744*  | TYRO3 protein tyrosine     | 23 (0.00)  | 15 (0.40)  | 1.07 |
| 12-01 | Gp3 | g.chr7:66479516G>T   | Nonsense Mutation | TYW1    | p.G180*  | tRNA-yW synthesizing       | 93 (0.00)  | 25 (0.28)  | 0.75 |
| 12-01 | Gp3 | g.chr1:1198729C>A    | Nonsense Mutation | UBE2J2  | p.E73*   | ubiquitin-conjugating er   | 134 (0.00) | 46 (0.22)  | 0.58 |
| 12-01 | Gp3 | g.chr11:118255624G>T | Missense Mutation | UBE4A   | p.M799I  | ubiquitination factor E4   | 45 (0.00)  | 38 (0.21)  | 0.56 |
| 12-01 | Gp3 | g.chr1:10161208G>T   | Missense Mutation | UBE4B   | p.E130D  | ubiquitination factor E4   | 74 (0.00)  | 18 (0.61)  | 1.63 |
| 12-01 | Gp3 | g.chr16:4910682C>T   | Missense Mutation | UBN1    | p.A230V  | ubinnuclein 1              | 175 (0.00) | 87 (0.16)  | 0.43 |
| 12-01 | Gp3 | g.chr16:4918879C>G   | Missense Mutation | UBN1    | p.Q386E  | ubinnuclein 1              | 100 (0.00) | 25 (0.64)  | 1.71 |
| 12-01 | Gp3 | g.chrX:56591114C>T   | Missense Mutation | UBQLN2  | p.R270C  | ubiquilin 2                | 151 (0.00) | 39 (0.28)  | 0.47 |
| 12-01 | Gp3 | g.chr10:99327732C>A  | Missense Mutation | UBTD1   | p.D44E   | ubiquitin domain contain   | 80 (0.00)  | 96 (0.24)  | 0.64 |

|       |     |                      |                   |         |          |                                     |            |      |
|-------|-----|----------------------|-------------------|---------|----------|-------------------------------------|------------|------|
| 12-01 | Gp3 | g.chr12:132393747G>A | Missense Mutation | ULK1    | p.V211I  | unc-51 like autophagy a 23 (0.00)   | 34 (0.15)  | 0.39 |
| 12-01 | Gp3 | g.chr19:17750005G>A  | Missense Mutation | UNC13A  | p.P990S  | unc-13 homolog A (C. e43 (0.00)     | 23 (0.43)  | 1.16 |
| 12-01 | Gp3 | g.chr9:35375170C>A   | Missense Mutation | UNC13B  | p.T447K  | unc-13 homolog B (C. e296 (0.00)    | 33 (0.21)  | 0.57 |
| 12-01 | Gp3 | g.chr2:99227304G>T   | Missense Mutation | UNC50   | p.W116L  | unc-50 homolog (C. ele;49 (0.00)    | 18 (0.33)  | 0.89 |
| 12-01 | Gp3 | g.chr16:21973827C>T  | Missense Mutation | UQCRC2  | p.R127W  | ubiquinol-cytochrome c 32 (0.00)    | 51 (0.16)  | 0.42 |
| 12-01 | Gp3 | g.chrX:47106604G>A   | Missense Mutation | USP11   | p.V802M  | ubiquitin specific peptid66 (0.02)  | 33 (0.30)  | 0.51 |
| 12-01 | Gp3 | g.chr1:55591349G>A   | Silent            | USP24   | p.L1240L | ubiquitin specific peptid24 (0.00)  | 18 (0.50)  | 1.33 |
| 12-01 | Gp3 | g.chr12:109520792C>A | Missense Mutation | USP30   | p.Q334K  | ubiquitin specific peptid52 (0.00)  | 33 (0.15)  | 0.40 |
| 12-01 | Gp3 | g.chr17:49353277C>T  | Silent            | UTP18   | p.I254I  | UTP18 small subunit (S 24 (0.00)    | 18 (0.44)  | 1.19 |
| 12-01 | Gp3 | g.chr6:144820421G>A  | Missense Mutation | UTRN    | p.R1541K | utrophin 98 (0.00)                  | 22 (0.95)  | 2.55 |
| 12-01 | Gp3 | g.chr8:100789139C>T  | Missense Mutation | VPS13B  | p.H2487Y | vacuolar protein sorting 48 (0.00)  | 39 (0.31)  | 0.82 |
| 12-01 | Gp3 | g.chr20:25059476C>A  | Missense Mutation | VSX1    | p.D206Y  | visual system homeobox 160 (0.00)   | 43 (0.30)  | 0.81 |
| 12-01 | Gp3 | g.chr6:142519639C>A  | Nonsense Mutation | VTA1    | p.S195*  | vesicle (multivesicular t 80 (0.00) | 30 (0.20)  | 0.53 |
| 12-01 | Gp3 | g.chr9:137006631G>A  | Splice Site       | WDR5    |          | WD repeat domain 5 66 (0.00)        | 18 (0.39)  | 1.04 |
| 12-01 | Gp3 | g.chr2:74650021C>G   | Missense Mutation | WDR54   | p.R83G   | WD repeat domain 54 87 (0.00)       | 37 (0.27)  | 0.72 |
| 12-01 | Gp3 | g.chr7:158695106G>A  | Missense Mutation | WDR60   | p.D393N  | WD repeat domain 60 46 (0.00)       | 24 (0.50)  | 1.33 |
| 12-01 | Gp3 | g.chr3:14193605G>C   | Intron            | XPC     |          | xeroderma pigmentosun 86 (0.00)     | 33 (0.15)  | 0.40 |
| 12-01 | Gp3 | g.chr3:14206569C>T   | Intron            | XPC     |          | xeroderma pigmentosun 138 (0.01)    | 15 (0.40)  | 1.07 |
| 12-01 | Gp3 | g.chr6:43483678G>A   | Silent            | YIPF3   | p.F85F   | Yip1 domain family, mc 276 (0.00)   | 64 (0.16)  | 0.42 |
| 12-01 | Gp3 | g.chr10:27431328G>T  | Missense Mutation | YME1L1  | p.Q140K  | YME1-like 1 ATPase 22 (0.00)        | 31 (0.19)  | 0.52 |
| 12-01 | Gp3 | g.chr11:57413834G>A  | Missense Mutation | YPEL4   | p.T77M   | yippee-like 4 (Drosophi 92 (0.00)   | 47 (0.21)  | 0.57 |
| 12-01 | Gp3 | g.chr7:100371392T>C  | RNA               | ZAN     |          | zonadhesin (gene/pseud 43 (0.00)    | 33 (0.15)  | 0.40 |
| 12-01 | Gp3 | g.chr22:50280049C>T  | Silent            | ZBED4   | p.S913S  | zinc finger, BED-type c 113 (0.01)  | 180 (0.13) | 0.44 |
| 12-01 | Gp3 | g.chr6:109802892G>T  | Missense Mutation | ZBTB24  | p.A113D  | zinc finger and BTB do 157 (0.00)   | 67 (0.39)  | 1.03 |
| 12-01 | Gp3 | g.chr1:173854900C>A  | Missense Mutation | ZBTB37  | p.Q384K  | zinc finger and BTB do 47 (0.00)    | 54 (0.52)  | 1.38 |
| 12-01 | Gp3 | g.chr12:56515147A>T  | Silent            | ZC3H10  | p.V267V  | zinc finger CCCH-type 37 (0.00)     | 39 (0.18)  | 0.48 |
| 12-01 | Gp3 | g.chr12:56515187G>C  | Missense Mutation | ZC3H10  | p.V281L  | zinc finger CCCH-type 23 (0.00)     | 31 (0.19)  | 0.52 |
| 12-01 | Gp3 | g.chr9:88954955G>T   | Missense Mutation | ZCCHC6  | p.Q402K  | zinc finger, CCHC dom 48 (0.00)     | 14 (0.43)  | 1.14 |
| 12-01 | Gp3 | g.chr12:122958295C>A | Missense Mutation | ZCCHC8  | p.D387Y  | zinc finger, CCHC dom 470 (0.00)    | 229 (0.16) | 0.42 |
| 12-01 | Gp3 | g.chr2:207170355G>A  | Missense Mutation | ZDBF2   | p.C368Y  | zinc finger, DBF-type c 89 (0.00)   | 66 (0.53)  | 1.41 |
| 12-01 | Gp3 | g.chr8:77776189T>A   | Silent            | ZFHX4   | p.T3413T | zinc finger homeobox 4 33 (0.00)    | 41 (0.22)  | 0.59 |
| 12-01 | Gp3 | g.chr8:77776200C>A   | Missense Mutation | ZFHX4   | p.A3417D | zinc finger homeobox 4 33 (0.00)    | 44 (0.20)  | 0.55 |
| 12-01 | Gp3 | g.chr14:68274532G>T  | Missense Mutation | ZFYVE26 | p.L157I  | zinc finger, FYVE dom 40 (0.00)     | 67 (0.25)  | 0.68 |
| 12-01 | Gp3 | g.chr8:124267313C>T  | Missense Mutation | ZHX1    | p.A292T  | zinc fingers and homeo 98 (0.00)    | 54 (0.17)  | 0.44 |
| 12-01 | Gp3 | g.chr19:44680469G>A  | Missense Mutation | ZNF226  | p.V352I  | zinc finger protein 226 130 (0.00)  | 29 (0.55)  | 1.47 |

|       |     |                      |                   |         |          |                                   |            |            |      |
|-------|-----|----------------------|-------------------|---------|----------|-----------------------------------|------------|------------|------|
| 12-01 | Gp3 | g.chr19:35434428C>T  | Silent            | ZNF30   | p.I187I  | zinc finger protein 30            | 17 (0.00)  | 11 (0.73)  | 1.94 |
| 12-01 | Gp3 | g.chr8:28206746C>G   | Splice Site       | ZNF395  |          | zinc finger protein 395           | 41 (0.00)  | 36 (0.17)  | 0.44 |
| 12-01 | Gp3 | g.chr19:58437880G>T  | Missense Mutation | ZNF418  | p.Q557K  | zinc finger protein 418           | 64 (0.00)  | 22 (0.36)  | 0.97 |
| 12-01 | Gp3 | g.chr18:74091529G>A  | Silent            | ZNF516  | p.S847S  | zinc finger protein 516           | 44 (0.00)  | 96 (0.11)  | 0.40 |
| 12-01 | Gp3 | g.chr10:97916509C>A  | RNA               | ZNF518A |          | zinc finger protein 518A          | 58 (0.00)  | 27 (0.26)  | 0.69 |
| 12-01 | Gp3 | g.chr19:58371227C>A  | Missense Mutation | ZNF587  | p.Q483K  | zinc finger protein 587           | 46 (0.00)  | 28 (0.32)  | 0.86 |
| 12-01 | Gp3 | g.chr19:53210019G>T  | Missense Mutation | ZNF611  | p.H97N   | zinc finger protein 611           | 119 (0.00) | 18 (0.50)  | 1.33 |
| 12-01 | Gp3 | g.chr19:52619239C>T  | Missense Mutation | ZNF616  | p.R393H  | zinc finger protein 616           | 44 (0.00)  | 22 (0.36)  | 0.97 |
| 12-01 | Gp3 | g.chr19:53912051G>A  | Missense Mutation | ZNF765  | p.E415K  | zinc finger protein 765           | 31 (0.00)  | 12 (0.50)  | 1.33 |
| 12-01 | Gp3 | g.chr7:88956751C>A   | Missense Mutation | ZNF804B | p.L115I  | zinc finger protein 804B          | 25 (0.00)  | 24 (0.38)  | 1.00 |
| 12-01 | Gp3 | g.chr19:53056527G>A  | Missense Mutation | ZNF808  | p.D120N  | zinc finger protein 808           | 78 (0.00)  | 26 (0.23)  | 0.62 |
| 12-01 | Gp3 | g.chr14:102793059C>A | Missense Mutation | ZNF839  | p.D342E  | zinc finger protein 839           | 60 (0.00)  | 31 (0.16)  | 0.43 |
| 12-01 | Gp3 | g.chr19:56755757G>T  | Nonsense Mutation | ZSCAN5D | p.E113*  |                                   | 68 (0.00)  | 31 (0.16)  | 0.43 |
| 12-01 | Gp4 | g.chr12:9221390G>A   | Missense Mutation | A2M     | p.P1438S | alpha-2-macroglobulin             | 20 (0.00)  | 23 (0.91)  | 0.93 |
| 12-01 | Gp4 | g.chr5:178201004G>A  | RNA               | AACSP1  |          | acetoacetyl-CoA synthetase        | 17 (0.00)  | 26 (0.58)  | 1.54 |
| 12-01 | Gp4 | g.chr2:69784027C>A   | Missense Mutation | AAK1    | p.D83Y   | AP2 associated kinase 1           | 147 (0.00) | 47 (0.98)  | 2.61 |
| 12-01 | Gp4 | g.chr6:44272032C>G   | Missense Mutation | AARS2   | p.K631N  | alanyl-tRNA synthetase            | 64 (0.00)  | 97 (0.43)  | 1.15 |
| 12-01 | Gp4 | g.chr4:57220237C>A   | Missense Mutation | AASDH   | p.G451C  | aminoadipate-semialdehyde         | 24 (0.00)  | 33 (0.24)  | 0.65 |
| 12-01 | Gp4 | g.chr7:48318070C>A   | Missense Mutation | ABCA13  | p.L2427M | ATP-binding cassette, subfamily 1 | 30 (0.00)  | 31 (0.26)  | 0.69 |
| 12-01 | Gp4 | g.chr9:139907033G>T  | Silent            | ABCA2   | p.A1697A | ATP-binding cassette, subfamily 1 | 23 (0.00)  | 50 (0.32)  | 0.85 |
| 12-01 | Gp4 | g.chr9:139911480A>T  | Missense Mutation | ABCA2   | p.S884T  | ATP-binding cassette, subfamily 1 | 55 (0.00)  | 80 (0.23)  | 0.60 |
| 12-01 | Gp4 | g.chr1:94508432C>A   | Silent            | ABCA4   | p.S1071S | ATP-binding cassette, subfamily 1 | 224 (0.00) | 46 (0.22)  | 0.58 |
| 12-01 | Gp4 | g.chr17:66979880C>T  | Missense Mutation | ABCA9   | p.R1537K | ATP-binding cassette, subfamily 1 | 184 (0.00) | 34 (0.38)  | 1.02 |
| 12-01 | Gp4 | g.chr1:229683272G>T  | Missense Mutation | ABCB10  | p.Q299K  | ATP-binding cassette, subfamily 1 | 109 (0.00) | 12 (0.75)  | 2.00 |
| 12-01 | Gp4 | g.chr7:150730774G>A  | Missense Mutation | ABCB8   | p.A60T   | ATP-binding cassette, subfamily 1 | 40 (0.00)  | 244 (0.39) | 1.04 |
| 12-01 | Gp4 | g.chr12:123430600G>T | Missense Mutation | ABCB9   | p.A408D  | ATP-binding cassette, subfamily 1 | 22 (0.00)  | 84 (0.20)  | 0.54 |
| 12-01 | Gp4 | g.chr16:16215929G>T  | Missense Mutation | ABCC1   | p.S1163I | ATP-binding cassette, subfamily 1 | 36 (0.00)  | 32 (0.28)  | 0.75 |
| 12-01 | Gp4 | g.chr6:43414029A>G   | Missense Mutation | ABCC10  | p.N1130S | ATP-binding cassette, subfamily 1 | 22 (0.00)  | 72 (0.32)  | 0.85 |
| 12-01 | Gp4 | g.chr16:48226479C>T  | Silent            | ABCC11  | p.K886K  | ATP-binding cassette, subfamily 1 | 114 (0.00) | 187 (0.59) | 1.57 |
| 12-01 | Gp4 | g.chr10:101557005G>T | Nonsense Mutation | ABCC2   | p.E262*  | ATP-binding cassette, subfamily 1 | 51 (0.00)  | 14 (0.93)  | 2.48 |
| 12-01 | Gp4 | g.chr16:16272669G>A  | Silent            | ABCC6   | p.L801L  | ATP-binding cassette, subfamily 1 | 139 (0.00) | 238 (0.19) | 0.52 |
| 12-01 | Gp4 | g.chr11:17428451T>A  | Missense Mutation | ABCC8   | p.N1049I | ATP-binding cassette, subfamily 1 | 102 (0.00) | 27 (0.56)  | 1.48 |
| 12-01 | Gp4 | g.chr11:17449907G>T  | Silent            | ABCC8   | p.R657R  | ATP-binding cassette, subfamily 1 | 47 (0.00)  | 66 (0.27)  | 0.73 |
| 12-01 | Gp4 | g.chr12:40001460G>A  | Nonsense Mutation | ABCD2   | p.R393*  | ATP-binding cassette, subfamily 1 | 49 (0.00)  | 30 (0.97)  | 2.58 |
| 12-01 | Gp4 | g.chr11:119020722G>T | Missense Mutation | ABCG4   | p.G16V   | ATP-binding cassette, subfamily 1 | 17 (0.00)  | 76 (0.54)  | 1.44 |

|       |     |                      |                   |             |          |                          |            |            |      |
|-------|-----|----------------------|-------------------|-------------|----------|--------------------------|------------|------------|------|
| 12-01 | Gp4 | g.chr20:25282925G>A  | Missense Mutation | ABHD12      | p.P363S  | abhydrolase domain con   | 146 (0.00) | 263 (0.25) | 0.67 |
| 12-01 | Gp4 | g.chr15:89738637G>T  | Nonsense Mutation | ABHD2       | p.E421*  | abhydrolase domain con   | 49 (0.00)  | 55 (0.27)  | 0.73 |
| 12-01 | Gp4 | g.chr10:116307527C>T | Missense Mutation | ABLIM1      | p.G228S  | actin binding LIM prote  | 52 (0.00)  | 112 (0.29) | 0.79 |
| 12-01 | Gp4 | g.chr22:19112662T>A  | lincRNA           | AC004471.10 |          |                          | 56 (0.00)  | 43 (0.33)  | 0.87 |
| 12-01 | Gp4 | g.chr19:29213655T>G  | lincRNA           | AC005307.3  |          |                          | 33 (0.00)  | 37 (0.97)  | 2.59 |
| 12-01 | Gp4 | g.chr2:51820153C>A   | lincRNA           | AC007682.1  |          |                          | 25 (0.00)  | 30 (0.27)  | 0.71 |
| 12-01 | Gp4 | g.chr2:231013625G>A  | RNA               | AC009950.2  |          |                          | 19 (0.00)  | 25 (0.64)  | 1.71 |
| 12-01 | Gp4 | g.chr2:96906551C>A   | RNA               | AC012307.3  |          |                          | 83 (0.00)  | 54 (0.48)  | 1.28 |
| 12-01 | Gp4 | g.chr2:62373709T>C   | RNA               | AC018462.2  |          |                          | 406 (0.00) | 70 (0.39)  | 1.03 |
| 12-01 | Gp4 | g.chr2:130989055G>T  | RNA               | AC018804.7  |          |                          | 44 (0.00)  | 50 (0.16)  | 0.43 |
| 12-01 | Gp4 | g.chr2:199578710C>A  | lincRNA           | AC019330.1  |          |                          | 39 (0.00)  | 22 (0.32)  | 0.85 |
| 12-01 | Gp4 | g.chr2:219219090G>T  | RNA               | AC021016.8  |          |                          | 59 (0.00)  | 42 (0.45)  | 1.21 |
| 12-01 | Gp4 | g.chr8:61850709C>A   | lincRNA           | AC022182.1  |          |                          | 63 (0.02)  | 38 (0.24)  | 0.63 |
| 12-01 | Gp4 | g.chr8:61850759G>A   | lincRNA           | AC022182.1  |          |                          | 66 (0.00)  | 45 (0.96)  | 2.55 |
| 12-01 | Gp4 | g.chr3:6042052C>A    | lincRNA           | AC027119.1  |          |                          | 22 (0.00)  | 12 (0.50)  | 1.33 |
| 12-01 | Gp4 | g.chr2:11242862C>A   | lincRNA           | AC062028.1  |          |                          | 32 (0.00)  | 21 (0.52)  | 1.40 |
| 12-01 | Gp4 | g.chr2:178062912G>T  | RNA               | AC079305.8  |          |                          | 32 (0.00)  | 127 (0.15) | 0.40 |
| 12-01 | Gp4 | g.chr2:132277807C>G  | RNA               | AC093838.4  |          |                          | 16 (0.00)  | 39 (0.26)  | 0.68 |
| 12-01 | Gp4 | g.chr2:221143741G>C  | lincRNA           | AC114765.1  |          |                          | 17 (0.00)  | 18 (0.39)  | 1.04 |
| 12-01 | Gp4 | g.chr15:62535599C>A  | RNA               | AC126323.1  |          |                          | 265 (0.00) | 291 (0.20) | 0.53 |
| 12-01 | Gp4 | g.chr5:179078974C>A  | Missense Mutation | AC136604.1  | p.P153T  |                          | 140 (0.00) | 54 (0.46)  | 1.23 |
| 12-01 | Gp4 | g.chr3:38168087T>C   | Missense Mutation | ACAA1       | p.Q244R  | acetyl-CoA acyltransfer  | 154 (0.00) | 238 (0.56) | 1.50 |
| 12-01 | Gp4 | g.chr12:109616974G>T | Missense Mutation | ACACB       | p.A507S  | acetyl-CoA carboxylase   | 75 (0.00)  | 48 (0.98)  | 2.61 |
| 12-01 | Gp4 | g.chr17:7124374C>A   | Silent            | ACADVL      | p.T158T  | acyl-CoA dehydrogenas    | 38 (0.00)  | 24 (0.33)  | 0.89 |
| 12-01 | Gp4 | g.chr15:89402437G>A  | Silent            | ACAN        | p.S2207S | aggrecan                 | 255 (0.00) | 163 (0.20) | 0.54 |
| 12-01 | Gp4 | g.chr17:61561219G>T  | Silent            | ACE         | p.V532V  | angiotensin I converting | 41 (0.00)  | 38 (0.32)  | 0.84 |
| 12-01 | Gp4 | g.chr17:40024143G>A  | Nonsense Mutation | ACLY        | p.Q1076* | ATP citrate lyase        | 200 (0.00) | 91 (0.56)  | 0.47 |
| 12-01 | Gp4 | g.chr1:6378555C>A    | Nonsense Mutation | ACOT7       | p.G247*  | acyl-CoA thioesterase    | 784 (0.00) | 44 (0.32)  | 0.85 |
| 12-01 | Gp4 | g.chr20:44483925C>A  | Missense Mutation | ACOT8       | p.R45S   | acyl-CoA thioesterase    | 827 (0.00) | 58 (0.45)  | 1.20 |
| 12-01 | Gp4 | g.chr20:33470628C>A  | Nonsense Mutation | ACSS2       | p.Y70*   | acyl-CoA synthetase sh   | 44 (0.00)  | 12 (0.58)  | 1.56 |
| 12-01 | Gp4 | g.chr17:79478032C>T  | Missense Mutation | ACTG1       | p.G302D  | actin, gamma 1           | 70 (0.00)  | 245 (0.18) | 0.49 |
| 12-01 | Gp4 | g.chr19:8808632G>T   | Silent            | ACTL9       | p.A140A  | actin-like 9             | 28 (0.00)  | 12 (0.50)  | 1.33 |
| 12-01 | Gp4 | g.chr14:69341826G>C  | Missense Mutation | ACTN1       | p.A848G  | actinin, alpha 1         | 44 (0.00)  | 35 (0.46)  | 1.22 |
| 12-01 | Gp4 | g.chr14:69352243C>T  | Silent            | ACTN1       | p.S428S  | actinin, alpha 1         | 67 (0.00)  | 70 (0.14)  | 0.38 |
| 12-01 | Gp4 | g.chr1:236902650C>G  | Missense Mutation | ACTN2       | p.P309A  | actinin, alpha 2         | 141 (0.00) | 321 (0.17) | 0.45 |

|       |     |                      |                   |            |          |                           |            |            |      |
|-------|-----|----------------------|-------------------|------------|----------|---------------------------|------------|------------|------|
| 12-01 | Gp4 | g.chr1:2938533G>T    | Nonsense Mutation | ACTRT2     | p.E95*   | actin-related protein T2  | 88 (0.00)  | 110 (0.18) | 0.48 |
| 12-01 | Gp4 | g.chr5:156915309C>G  | Silent            | ADAM19     | p.R838R  | ADAM metallopeptidas      | 58 (0.00)  | 20 (0.85)  | 2.27 |
| 12-01 | Gp4 | g.chr7:87772441G>T   | Splice Site       | ADAM22     |          | ADAM metallopeptidas      | 31 (0.00)  | 28 (0.79)  | 2.10 |
| 12-01 | Gp4 | g.chr8:38928919C>A   | Missense Mutation | ADAM9      | p.T565N  | ADAM metallopeptidas      | 44 (0.00)  | 78 (0.94)  | 2.50 |
| 12-01 | Gp4 | g.chr19:8661458C>T   | Missense Mutation | ADAMTS10   | p.C351Y  | ADAM metallopeptidas      | 67 (0.00)  | 198 (0.15) | 0.40 |
| 12-01 | Gp4 | g.chr10:72462200C>A  | Missense Mutation | ADAMTS14   | p.P219T  | ADAM metallopeptidas      | 96 (0.00)  | 219 (0.16) | 0.41 |
| 12-01 | Gp4 | g.chr11:130331409A>G | Missense Mutation | ADAMTS15   | p.D328G  | ADAM metallopeptidas      | 144 (0.01) | 143 (0.50) | 1.34 |
| 12-01 | Gp4 | g.chr11:130341189G>T | Silent            | ADAMTS15   | p.L663L  | ADAM metallopeptidas      | 30 (0.00)  | 78 (0.28)  | 0.75 |
| 12-01 | Gp4 | g.chr11:130286860C>T | Silent            | ADAMTS8    | p.A357A  | ADAM metallopeptidas      | 183 (0.00) | 154 (0.16) | 0.42 |
| 12-01 | Gp4 | g.chr9:18574196C>T   | Missense Mutation | ADAMTSL1   | p.P136S  | ADAMTS-like 1             | 48 (0.00)  | 13 (0.77)  | 2.05 |
| 12-01 | Gp4 | g.chr12:49165675C>A  | Missense Mutation | ADCY6      | p.A957S  | adenylate cyclase 6       | 135 (0.00) | 34 (0.21)  | 0.55 |
| 12-01 | Gp4 | g.chr7:31142904C>T   | Missense Mutation | ADCYAP1R1  | p.T395I  | adenylate cyclase activa  | 188 (0.00) | 276 (0.43) | 1.16 |
| 12-01 | Gp4 | g.chr4:2928373C>A    | Missense Mutation | ADD1       | p.D653E  | adducin 1 (alpha)         | 56 (0.00)  | 71 (0.49)  | 1.31 |
| 12-01 | Gp4 | g.chr6:147045455G>T  | Silent            | ADGB       | p.L743L  | androglobin               | 115 (0.00) | 259 (0.94) | 2.51 |
| 12-01 | Gp4 | g.chr11:67049350G>T  | Missense Mutation | ADRBK1     | p.R295L  | adrenergic, beta, receptc | 45 (0.00)  | 250 (0.36) | 0.96 |
| 12-01 | Gp4 | g.chr20:60878835G>T  | Missense Mutation | ADRM1      | p.D71Y   | adhesion regulating mol   | 17 (0.00)  | 11 (0.45)  | 1.21 |
| 12-01 | Gp4 | g.chr22:40759001G>A  | Missense Mutation | ADSL       | p.E343K  | adenylosuccinate lyase    | 142 (0.00) | 123 (0.36) | 0.95 |
| 12-01 | Gp4 | g.chr5:132234024A>T  | Missense Mutation | AFF4       | p.S429R  | AF4/FMR2 family, men      | 93 (0.00)  | 41 (0.37)  | 0.98 |
| 12-01 | Gp4 | g.chr4:178354463G>T  | Missense Mutation | AGA        | p.P282Q  | aspartylglucosaminidas    | 15 (0.00)  | 13 (0.46)  | 1.23 |
| 12-01 | Gp4 | g.chr10:88764074T>C  | RNA               | AGAP11     |          | ankyrin repeat and GTP    | 94 (0.00)  | 14 (0.43)  | 1.14 |
| 12-01 | Gp4 | g.chr7:150840862G>T  | Silent            | AGAP3      | p.L525L  | ArfGAP with GTPase d      | 30 (0.00)  | 45 (0.31)  | 0.83 |
| 12-01 | Gp4 | g.chr10:46322410G>A  | Silent            | AGAP4      | p.I315I  | ArfGAP with GTPase d      | 242 (0.00) | 49 (0.22)  | 0.60 |
| 12-01 | Gp4 | g.chr5:76326750A>G   | Silent            | AGGF1      | p.T53T   | angiogenic factor with C  | 149 (0.00) | 222 (0.27) | 0.72 |
| 12-01 | Gp4 | g.chr11:62300932C>A  | Silent            | AHNAK      | p.G319G  | AHNAK nucleoprotein       | 110 (0.00) | 131 (0.17) | 0.45 |
| 12-01 | Gp4 | g.chr3:186338667C>A  | Missense Mutation | AHSG       | p.A352D  | alpha-2-HS-glycoprotein   | 24 (0.00)  | 71 (0.61)  | 1.62 |
| 12-01 | Gp4 | g.chr22:21333968G>T  | Silent            | AIFM3      | p.L549L  | apoptosis-inducing fact   | 40 (0.00)  | 36 (0.33)  | 0.89 |
| 12-01 | Gp4 | g.chr17:55189869G>T  | Missense Mutation | AKAP1      | p.D665Y  | A kinase (PRKA) ancho     | 86 (0.00)  | 63 (0.14)  | 0.38 |
| 12-01 | Gp4 | g.chr17:55191902C>A  | Missense Mutation | AKAP1      | p.T729K  | A kinase (PRKA) ancho     | 91 (0.00)  | 129 (0.15) | 0.39 |
| 12-01 | Gp4 | g.chr7:91724467C>T   | Missense Mutation | AKAP9      | p.R3237W | A kinase (PRKA) ancho     | 47 (0.00)  | 148 (0.20) | 0.52 |
| 12-01 | Gp4 | g.chr7:91737817C>A   | Silent            | AKAP9      | p.G3852G | A kinase (PRKA) ancho     | 102 (0.00) | 33 (0.58)  | 1.54 |
| 12-01 | Gp4 | g.chr9:117138998C>A  | Missense Mutation | AKNA       | p.K363N  | AT-hook transcription f   | 38 (0.00)  | 80 (0.84)  | 2.23 |
| 12-01 | Gp4 | g.chr7:134136346C>A  | Missense Mutation | AKR1B1     | p.V76F   | aldo-keto reductase fam   | 248 (0.00) | 214 (0.29) | 0.76 |
| 12-01 | Gp4 | g.chr19:40741185G>A  | Silent            | AKT2       | p.D416D  | v-akt murine thymoma      | 126 (0.00) | 84 (0.18)  | 0.48 |
| 12-01 | Gp4 | g.chr17:18325821G>T  | RNA               | AL353997.3 |          |                           | 28 (0.00)  | 26 (0.65)  | 1.74 |
| 12-01 | Gp4 | g.chr19:49967903T>A  | Nonsense Mutation | ALDH16A1   | p.Y484*  | aldehyde dehydrogenas     | 90 (0.00)  | 49 (0.59)  | 1.58 |

|       |     |                      |                   |            |          |                                                   |             |            |      |
|-------|-----|----------------------|-------------------|------------|----------|---------------------------------------------------|-------------|------------|------|
| 12-01 | Gp4 | g.chr3:125822689C>A  | Splice Site       | ALDH1L1    | p.G895V  | aldehyde dehydrogenase 15                         | 15 (0.00)   | 34 (0.56)  | 1.49 |
| 12-01 | Gp4 | g.chr3:125850275C>A  | Missense Mutation | ALDH1L1    | p.M535I  | aldehyde dehydrogenase 187                        | 187 (0.00)  | 122 (0.24) | 0.63 |
| 12-01 | Gp4 | g.chr11:111749334C>A | Missense Mutation | ALG9       | p.G92V   | ALG9, alpha-1,2-mannanase                         | 99 (0.00)   | 18 (0.67)  | 1.78 |
| 12-01 | Gp4 | g.chr2:29445428C>T   | Silent            | ALK        | p.V1135V | anaplastic lymphoma receptor tyrosine kinase      | 43 (0.00)   | 18 (0.50)  | 1.33 |
| 12-01 | Gp4 | g.chr19:36501505C>A  | Missense Mutation | ALKBH6     | p.E139D  | alkB, alkylation repair helicase                  | 80 (0.00)   | 75 (0.65)  | 1.74 |
| 12-01 | Gp4 | g.chr2:73784349G>A   | Missense Mutation | ALMS1      | p.A3360T | Alstrom syndrome 1                                | 81 (0.00)   | 223 (0.17) | 0.45 |
| 12-01 | Gp4 | g.chr2:73874844C>A   | RNA               | ALMS1P     |          | Alstrom syndrome 1 pseudogene                     | 20 (0.00)   | 40 (0.30)  | 0.80 |
| 12-01 | Gp4 | g.chr10:45920564T>A  | Nonsense Mutation | ALOX5      | p.L273*  | arachidonate 5-lipoxygenase                       | 35 (0.00)   | 77 (0.38)  | 1.00 |
| 12-01 | Gp4 | g.chr1:21889647C>A   | Silent            | ALPL       | p.A114A  | alkaline phosphatase, liver                       | 31 (0.00)   | 13 (0.69)  | 1.85 |
| 12-01 | Gp4 | g.chr3:46713040G>A   | Missense Mutation | ALS2CL     | p.R907C  | ALS2 C-terminal like                              | 82 (0.00)   | 121 (0.28) | 0.75 |
| 12-01 | Gp4 | g.chr2:131519739G>T  | Nonsense Mutation | AMER3      | p.E32*   | APC membrane recruiter                            | 20 (0.00)   | 23 (0.43)  | 1.16 |
| 12-01 | Gp4 | g.chr12:53819007G>C  | Silent            | AMHR2      | p.L161L  | anti-Mullerian hormone                            | 36 (0.00)   | 133 (0.30) | 0.80 |
| 12-01 | Gp4 | g.chr3:49756598C>A   | Missense Mutation | AMIGO3     | p.G101C  | adhesion molecule with extracellular domain       | 69 (0.00)   | 74 (0.15)  | 0.40 |
| 12-01 | Gp4 | g.chr11:94533444G>A  | Missense Mutation | AMOTL1     | p.R363Q  | angiogenin-like 1                                 | 123 (0.00)  | 34 (0.38)  | 1.02 |
| 12-01 | Gp4 | g.chr11:10527309G>A  | Missense Mutation | AMPD3      | p.D737N  | adenosine monophosphate phosphoribosyltransferase | 23 (0.00)   | 119 (0.47) | 1.25 |
| 12-01 | Gp4 | g.chr11:10527352G>A  | Missense Mutation | AMPD3      | p.R751Q  | adenosine monophosphate phosphoribosyltransferase | 22 (0.00)   | 115 (0.23) | 0.63 |
| 12-01 | Gp4 | g.chr3:49457154A>T   | Missense Mutation | AMT        | p.L180Q  | aminomethyltransferase                            | 175 (0.00)  | 96 (0.29)  | 0.78 |
| 12-01 | Gp4 | g.chr8:41581104G>A   | Silent            | ANK1       | p.I253I  | ankyrin 1, erythrocytic                           | 30 (0.00)   | 38 (0.39)  | 1.05 |
| 12-01 | Gp4 | g.chr2:190561043G>A  | Silent            | ANKAR      | p.L552L  | ankyrin and armadillo repeat domain               | 46 (0.00)   | 144 (0.73) | 1.94 |
| 12-01 | Gp4 | g.chr15:65235729T>A  | Missense Mutation | ANKDD1A    | p.I339K  | ankyrin repeat and death domain                   | 401 (0.00)  | 25 (0.36)  | 0.96 |
| 12-01 | Gp4 | g.chr17:4071182C>A   | Missense Mutation | ANKFY1     | p.C1135F | ankyrin repeat and FYV                            | 85 (0.01)   | 11 (0.73)  | 1.94 |
| 12-01 | Gp4 | g.chr17:4080518A>G   | Missense Mutation | ANKFY1     | p.V894A  | ankyrin repeat and FYV                            | 93 (0.00)   | 59 (0.17)  | 0.45 |
| 12-01 | Gp4 | g.chr12:133324805T>C | Silent            | ANKLE2     | p.G320G  | ankyrin repeat and LEM                            | 58 (0.00)   | 133 (0.23) | 0.60 |
| 12-01 | Gp4 | g.chr18:14179469G>T  | RNA               | ANKRD20A5P |          | ankyrin repeat domain                             | 224 (0.00)  | 125 (0.17) | 0.45 |
| 12-01 | Gp4 | g.chr19:4202924G>A   | Splice Site       | ANKRD24    |          | ankyrin repeat domain                             | 222 (0.00)  | 46 (0.22)  | 0.58 |
| 12-01 | Gp4 | g.chr19:33089209T>A  | Missense Mutation | ANKRD27    | p.N999Y  | ankyrin repeat domain                             | 2308 (0.00) | 41 (0.27)  | 0.72 |
| 12-01 | Gp4 | g.chr19:33130319G>T  | Silent            | ANKRD27    | p.T353T  | ankyrin repeat domain                             | 267 (0.00)  | 76 (0.20)  | 0.53 |
| 12-01 | Gp4 | g.chr21:14415158C>G  | RNA               | ANKRD30BP2 |          | ankyrin repeat domain                             | 389 (0.00)  | 29 (0.62)  | 1.66 |
| 12-01 | Gp4 | g.chr12:56646000G>T  | Nonsense Mutation | ANKRD52    | p.C490*  | ankyrin repeat domain                             | 5155 (0.00) | 48 (0.54)  | 1.44 |
| 12-01 | Gp4 | g.chr12:56647182G>A  | Silent            | ANKRD52    | p.S330S  | ankyrin repeat domain                             | 5120 (0.00) | 144 (0.30) | 0.80 |
| 12-01 | Gp4 | g.chr11:69933999C>G  | Missense Mutation | ANO1       | p.Q84E   | anoctamin 1, calcium activated chloride channel   | 40 (0.00)   | 158 (0.25) | 0.68 |
| 12-01 | Gp4 | g.chr11:69957812G>T  | Splice Site       | ANO1       |          | anoctamin 1, calcium activated chloride channel   | 247 (0.00)  | 70 (0.47)  | 1.26 |
| 12-01 | Gp4 | g.chr12:5744406C>A   | Silent            | ANO2       | p.V577V  | anoctamin 2, calcium activated chloride channel   | 121 (0.00)  | 67 (0.46)  | 1.23 |
| 12-01 | Gp4 | g.chr15:69079785G>A  | Silent            | ANP32A     | p.N98N   | acidic (leucine-rich) nuclear phosphoprotein      | 208 (0.00)  | 97 (0.90)  | 2.39 |
| 12-01 | Gp4 | g.chr15:90335765C>T  | Missense Mutation | ANPEP      | p.A760T  | alanyl (membrane) aminopeptidase                  | 179 (0.01)  | 285 (0.29) | 0.78 |

|       |     |                     |                   |            |          |                           |            |            |      |
|-------|-----|---------------------|-------------------|------------|----------|---------------------------|------------|------------|------|
| 12-01 | Gp4 | g.chr5:43040013C>G  | Missense Mutation | ANXA2R     | p.E46Q   | annexin A2 receptor       | 55 (0.00)  | 31 (0.94)  | 2.49 |
| 12-01 | Gp4 | g.chr7:150554808G>C | Missense Mutation | AOC1       | p.C417S  | amine oxidase, copper c   | 38 (0.00)  | 17 (0.35)  | 0.94 |
| 12-01 | Gp4 | g.chr11:64856220G>T | Missense Mutation | AP003068.6 | p.F59L   |                           | 143 (0.00) | 63 (0.33)  | 0.89 |
| 12-01 | Gp4 | g.chr19:16317194T>A | Missense Mutation | AP1M1      | p.F81Y   | adaptor-related protein c | 135 (0.00) | 163 (0.43) | 1.15 |
| 12-01 | Gp4 | g.chr11:984682C>G   | Missense Mutation | AP2A2      | p.T248S  | adaptor-related protein c | 362 (0.00) | 185 (0.72) | 1.92 |
| 12-01 | Gp4 | g.chr19:2112914G>T  | Missense Mutation | AP3D1      | p.A911D  | adaptor-related protein c | 54 (0.00)  | 119 (0.51) | 1.37 |
| 12-01 | Gp4 | g.chr19:2120959C>A  | Silent            | AP3D1      | p.A461A  | adaptor-related protein c | 51 (0.00)  | 79 (0.91)  | 2.43 |
| 12-01 | Gp4 | g.chr15:29397714T>C | Missense Mutation | APBA2      | p.Y553H  | amyloid beta (A4) precu   | 68 (0.00)  | 114 (0.20) | 0.64 |
| 12-01 | Gp4 | g.chr19:1456374G>A  | Missense Mutation | APC2       | p.D263N  | adenomatosis polyposis    | 21 (0.00)  | 48 (0.23)  | 0.61 |
| 12-01 | Gp4 | g.chr3:49713857C>T  | Missense Mutation | APEH       | p.S218F  | acylaminoacyl-peptide     | 191 (0.00) | 56 (0.14)  | 0.38 |
| 12-01 | Gp4 | g.chr20:24959413T>C | Silent            | APMAP      | p.A106A  | adipocyte plasma memb     | 66 (0.00)  | 39 (0.21)  | 0.55 |
| 12-01 | Gp4 | g.chr6:41029071C>T  | Missense Mutation | APOBEC2    | p.R46W   | apolipoprotein B mRNA     | 103 (0.00) | 175 (0.22) | 0.58 |
| 12-01 | Gp4 | g.chr22:39482504G>T | Missense Mutation | APOBEC3G   | p.G319V  | apolipoprotein B mRNA     | 58 (0.00)  | 17 (0.88)  | 2.35 |
| 12-01 | Gp4 | g.chr12:12940585G>T | Nonstop Mutation  | APOLD1     | p.*249L  | apolipoprotein L domain   | 126 (0.00) | 213 (0.38) | 0.39 |
| 12-01 | Gp4 | g.chr5:141051745C>G | Missense Mutation | ARAP3      | p.Q425H  | ArfGAP with RhoGAP        | 337 (0.00) | 379 (0.25) | 0.66 |
| 12-01 | Gp4 | g.chr1:228285044C>A | Splice Site       | ARF1       | p.G50G   | ADP-ribosylation factor   | 72 (0.00)  | 45 (0.24)  | 0.65 |
| 12-01 | Gp4 | g.chr22:43231398G>A | Silent            | ARFGAP3    | p.A121A  | ADP-ribosylation factor   | 167 (0.00) | 139 (0.17) | 0.46 |
| 12-01 | Gp4 | g.chr11:46703728G>C | Missense Mutation | ARHGAP1    | p.L108V  | Rho GTPase activating j   | 133 (0.00) | 171 (0.18) | 0.48 |
| 12-01 | Gp4 | g.chr1:161018853G>T | Missense Mutation | ARHGAP30   | p.A653E  | Rho GTPase activating j   | 79 (0.00)  | 94 (0.27)  | 0.71 |
| 12-01 | Gp4 | g.chrX:153175669G>C | Silent            | ARHGAP4    | p.P744P  | Rho GTPase activating j   | 18 (0.00)  | 14 (0.50)  | 0.83 |
| 12-01 | Gp4 | g.chr22:45210574C>A | Missense Mutation | ARHGAP8    | p.L108I  | Rho GTPase activating j   | 57 (0.00)  | 122 (0.62) | 1.66 |
| 12-01 | Gp4 | g.chr17:79827055C>T | Missense Mutation | ARHGDIS    | p.V137I  | Rho GDP dissociation i    | 45 (0.00)  | 20 (0.35)  | 0.93 |
| 12-01 | Gp4 | g.chr19:42406125C>A | Missense Mutation | ARHGEF1    | p.F467L  | Rho guanine nucleotide    | 52 (0.00)  | 126 (0.18) | 0.49 |
| 12-01 | Gp4 | g.chr19:42407906G>T | Missense Mutation | ARHGEF1    | p.Q644H  | Rho guanine nucleotide    | 112 (0.00) | 61 (0.16)  | 0.44 |
| 12-01 | Gp4 | g.chr8:1808165C>A   | Missense Mutation | ARHGEF10   | p.P99Q   | Rho guanine nucleotide    | 190 (0.00) | 391 (0.16) | 0.52 |
| 12-01 | Gp4 | g.chr8:1877554G>T   | Missense Mutation | ARHGEF10   | p.Q1008H | Rho guanine nucleotide    | 170 (0.01) | 95 (0.77)  | 2.52 |
| 12-01 | Gp4 | g.chr1:16525650C>A  | Missense Mutation | ARHGEF19   | p.S749I  | Rho guanine nucleotide    | 47 (0.00)  | 97 (0.14)  | 0.38 |
| 12-01 | Gp4 | g.chr2:39162918C>T  | Nonsense Mutation | ARHGEF33   | p.Q170*  | Rho guanine nucleotide    | 16 (0.00)  | 73 (0.97)  | 2.59 |
| 12-01 | Gp4 | g.chr5:149011716C>A | Silent            | ARHGEF37   | p.R664R  | Rho guanine nucleotide    | 80 (0.00)  | 47 (0.15)  | 0.40 |
| 12-01 | Gp4 | g.chr1:27105715G>A  | Missense Mutation | ARID1A     | p.E1559K | AT rich interactive dom   | 148 (0.00) | 63 (0.81)  | 2.16 |
| 12-01 | Gp4 | g.chr12:46244802C>T | Missense Mutation | ARID2      | p.P966S  | AT rich interactive dom   | 93 (0.00)  | 12 (0.58)  | 1.56 |
| 12-01 | Gp4 | g.chr19:968490C>G   | Silent            | ARID3A     | p.G527G  | AT rich interactive dom   | 47 (0.00)  | 109 (0.35) | 0.93 |
| 12-01 | Gp4 | g.chr15:74883559G>T | Missense Mutation | ARID3B     | p.A317S  | AT rich interactive dom   | 154 (0.01) | 115 (0.19) | 0.51 |
| 12-01 | Gp4 | g.chr2:97215175C>A  | Missense Mutation | ARID5A     | p.P12T   | AT rich interactive dom   | 49 (0.00)  | 41 (0.27)  | 0.72 |
| 12-01 | Gp4 | g.chr10:63851460C>T | Silent            | ARID5B     | p.V746V  | AT rich interactive dom   | 107 (0.00) | 13 (0.92)  | 2.46 |

|       |     |                     |                   |          |          |                                    |            |            |      |
|-------|-----|---------------------|-------------------|----------|----------|------------------------------------|------------|------------|------|
| 12-01 | Gp4 | g.chr10:63852555G>T | Silent            | ARID5B   | p.V1111V | AT rich interactive dom            | 167 (0.00) | 89 (0.47)  | 1.26 |
| 12-01 | Gp4 | g.chr17:73124810G>A | Silent            | ARMC7    | p.R70R   | armadillo repeat contain           | 33 (0.00)  | 135 (0.50) | 1.32 |
| 12-01 | Gp4 | g.chr15:80869239G>T | Missense Mutation | ARNT2    | p.A516S  | aryl-hydrocarbon recept            | 116 (0.00) | 109 (0.23) | 0.61 |
| 12-01 | Gp4 | g.chr7:98951695G>C  | Missense Mutation | ARPC1A   | p.V222L  | actin related protein 2/3          | 69 (0.00)  | 36 (0.47)  | 1.26 |
| 12-01 | Gp4 | g.chr17:4619285C>G  | Silent            | ARRB2    | p.G24G   | arrestin, beta 2                   | 112 (0.01) | 10 (0.90)  | 2.40 |
| 12-01 | Gp4 | g.chr1:23782630G>T  | Missense Mutation | ASAP3    | p.H63N   | ArfGAP with SH3 dom                | 124 (0.00) | 40 (0.65)  | 1.73 |
| 12-01 | Gp4 | g.chr17:7077136G>T  | Missense Mutation | ASGR1    | p.Q240K  | asialoglycoprotein recep           | 26 (0.00)  | 99 (0.29)  | 0.78 |
| 12-01 | Gp4 | g.chr17:32483084G>T | Missense Mutation | ASIC2    | p.F156L  | acid-sensing (proton-gat           | 236 (0.00) | 78 (0.49)  | 1.30 |
| 12-01 | Gp4 | g.chr17:32483090C>T | Silent            | ASIC2    | p.L154L  | acid-sensing (proton-gat           | 228 (0.00) | 77 (0.16)  | 0.42 |
| 12-01 | Gp4 | g.chr7:65553845C>G  | Missense Mutation | ASL      | p.A257G  | argininosuccinate lyase            | 76 (0.00)  | 138 (0.15) | 0.41 |
| 12-01 | Gp4 | g.chr2:70188309G>T  | Missense Mutation | ASPRV1   | p.A171D  | aspartic peptidase, retro          | 15 (0.00)  | 13 (0.77)  | 2.05 |
| 12-01 | Gp4 | g.chr9:133329755A>G | Missense Mutation | ASS1     | p.K57E   | argininosuccinate synth            | 71 (0.00)  | 30 (0.17)  | 0.44 |
| 12-01 | Gp4 | g.chr9:133355122C>A | Silent            | ASS1     | p.T236T  | argininosuccinate synth            | 23 (0.00)  | 15 (0.40)  | 1.07 |
| 12-01 | Gp4 | g.chr2:96789893C>A  | Missense Mutation | ASTL     | p.G331V  | astacin-like metallo-end           | 28 (0.00)  | 15 (0.33)  | 0.89 |
| 12-01 | Gp4 | g.chr8:124340703C>G | Missense Mutation | ATAD2    | p.E517Q  | ATPase family, AAA do              | 79 (0.00)  | 28 (0.54)  | 1.43 |
| 12-01 | Gp4 | g.chr1:1469448C>A   | Missense Mutation | ATAD3A   | p.S586Y  | ATPase family, AAA do              | 19 (0.00)  | 30 (0.27)  | 0.71 |
| 12-01 | Gp4 | g.chr17:29196592C>A | Missense Mutation | ATAD5    | p.Q1179K | ATPase family, AAA do              | 15 (0.07)  | 97 (0.20)  | 0.52 |
| 12-01 | Gp4 | g.chr11:64670805C>A | Missense Mutation | ATG2A    | p.L1189F | autophagy related 2A               | 57 (0.00)  | 25 (0.24)  | 0.64 |
| 12-01 | Gp4 | g.chr2:220088693G>T | Silent            | ATG9A    | p.R439R  | autophagy related 9A               | 151 (0.01) | 157 (0.75) | 1.99 |
| 12-01 | Gp4 | g.chr13:25263454T>C | Missense Mutation | ATP12A   | p.Y163H  | ATPase, H+/K+ transpo              | 84 (0.00)  | 65 (0.23)  | 0.62 |
| 12-01 | Gp4 | g.chr3:193153437C>G | Splice Site       | ATP13A4  | p.W923C  | ATPase type 13A4                   | 178 (0.00) | 139 (0.56) | 1.50 |
| 12-01 | Gp4 | g.chr3:193153476G>A | Silent            | ATP13A4  | p.Y910Y  | ATPase type 13A4                   | 140 (0.00) | 125 (0.66) | 1.77 |
| 12-01 | Gp4 | g.chr3:10417176C>T  | Missense Mutation | ATP2B2   | p.V407M  | ATPase, Ca <sup>++</sup> transport | 48 (0.00)  | 61 (0.21)  | 0.57 |
| 12-01 | Gp4 | g.chrX:152845640A>G | Missense Mutation | ATP2B3   | p.N1183D | ATPase, Ca <sup>++</sup> transport | 98 (0.00)  | 41 (0.41)  | 0.69 |
| 12-01 | Gp4 | g.chr2:71191620C>G  | Missense Mutation | ATP6V1B1 | p.A399G  | ATPase, H <sup>+</sup> transportin | 92 (0.00)  | 56 (0.43)  | 1.14 |
| 12-01 | Gp4 | g.chr2:10922459C>T  | Silent            | ATP6V1C2 | p.V338V  | ATPase, H <sup>+</sup> transportin | 141 (0.00) | 364 (0.29) | 0.76 |
| 12-01 | Gp4 | g.chr13:52544768G>A | Missense Mutation | ATP7B    | p.A468V  | ATPase, Cu <sup>++</sup> transport | 198 (0.00) | 28 (0.96)  | 2.57 |
| 12-01 | Gp4 | g.chr13:52548229G>A | Missense Mutation | ATP7B    | p.S376F  | ATPase, Cu <sup>++</sup> transport | 223 (0.00) | 17 (0.94)  | 2.51 |
| 12-01 | Gp4 | g.chr1:154320937A>T | Missense Mutation | ATP8B2   | p.T1106S | ATPase, aminophospho               | 20 (0.00)  | 31 (0.81)  | 2.15 |
| 12-01 | Gp4 | g.chr19:1785575T>A  | Missense Mutation | ATP8B3   | p.M1096L | ATPase, aminophospho               | 104 (0.00) | 47 (0.28)  | 0.74 |
| 12-01 | Gp4 | g.chr10:99439410G>T | Missense Mutation | AVPI1    | p.L85M   | arginine vasopressin-ind           | 25 (0.00)  | 96 (0.34)  | 0.92 |
| 12-01 | Gp4 | g.chr10:99439583G>T | Nonsense Mutation | AVPI1    | p.S27*   | arginine vasopressin-ind           | 21 (0.00)  | 49 (0.35)  | 0.93 |
| 12-01 | Gp4 | g.chr12:668532A>G   | Missense Mutation | B4GALNT3 | p.N945D  | beta-1,4-N-acetyl-galact           | 234 (0.00) | 26 (0.23)  | 0.62 |
| 12-01 | Gp4 | g.chr6:90642230C>A  | Missense Mutation | BACH2    | p.G808V  | BTB and CNC homolog                | 114 (0.00) | 191 (0.17) | 0.46 |
| 12-01 | Gp4 | g.chr6:90661099G>T  | Silent            | BACH2    | p.V242V  | BTB and CNC homolog                | 30 (0.00)  | 183 (0.25) | 0.66 |



|       |     |                      |                   |         |          |                           |             |            |      |
|-------|-----|----------------------|-------------------|---------|----------|---------------------------|-------------|------------|------|
| 12-01 | Gp4 | g.chr21:11097383C>G  | RNA               | BAGE2   |          | B melanoma antigen fa     | 50 (0.00)   | 29 (0.34)  | 0.92 |
| 12-01 | Gp4 | g.chr8:143561153C>A  | Missense Mutation | BAI1    | p.T609K  | brain-specific angiogen   | 94 (0.00)   | 106 (0.27) | 0.73 |
| 12-01 | Gp4 | g.chr1:32196611G>T   | Silent            | BAI2    | p.A1357A | brain-specific angiogen   | 31 (0.00)   | 70 (0.39)  | 1.03 |
| 12-01 | Gp4 | g.chr1:32205552G>T   | Missense Mutation | BAI2    | p.S714R  | brain-specific angiogen   | 53 (0.00)   | 28 (0.21)  | 0.57 |
| 12-01 | Gp4 | g.chr17:79077416A>C  | Missense Mutation | BAIAP2  | p.T116P  | BAI1-associated protein   | 29 (0.03)   | 85 (0.14)  | 0.38 |
| 12-01 | Gp4 | g.chr5:17275950C>A   | Missense Mutation | BASP1   | p.P209T  | brain abundant, membra    | 54 (0.00)   | 26 (0.19)  | 0.51 |
| 12-01 | Gp4 | g.chr11:64756889C>T  | Silent            | BATF2   | p.S94S   | basic leucine zipper tran | 28 (0.00)   | 95 (0.27)  | 0.73 |
| 12-01 | Gp4 | g.chr11:64756926G>T  | Missense Mutation | BATF2   | p.P82H   | basic leucine zipper tran | 21 (0.00)   | 88 (0.16)  | 0.42 |
| 12-01 | Gp4 | g.chr12:56995921C>G  | Silent            | BAZ2A   | p.A1160A | bromodomain adjacent t    | 46 (0.00)   | 132 (0.50) | 1.33 |
| 12-01 | Gp4 | g.chr7:33427732C>T   | Silent            | BBS9    | p.T697T  | Bardet-Biedl syndrome     | 226 (0.00)  | 122 (0.77) | 2.05 |
| 12-01 | Gp4 | g.chr1:156622373C>G  | Missense Mutation | BCAN    | p.P544R  | brevican                  | 47 (0.00)   | 34 (0.15)  | 0.39 |
| 12-01 | Gp4 | g.chr2:60687850G>T   | Missense Mutation | BCL11A  | p.P699T  | B-cell CLL/lymphoma       | 198 (0.01)  | 225 (0.24) | 0.63 |
| 12-01 | Gp4 | g.chr20:30309610C>A  | Missense Mutation | BCL2L1  | p.G138C  | BCL2-like 1               | 187 (0.00)  | 116 (0.70) | 1.86 |
| 12-01 | Gp4 | g.chr20:30309750C>G  | Missense Mutation | BCL2L1  | p.R91T   | BCL2-like 1               | 148 (0.00)  | 229 (0.14) | 0.38 |
| 12-01 | Gp4 | g.chr12:122497069G>A | Silent            | BCL7A   | p.*211*  | B-cell CLL/lymphoma       | 7180 (0.00) | 103 (0.37) | 0.98 |
| 12-01 | Gp4 | g.chrX:129171491T>A  | Missense Mutation | BCORL1  | p.S1485R | BCL6 corepressor-like     | 161 (0.00)  | 14 (0.71)  | 1.19 |
| 12-01 | Gp4 | g.chrX:129173127G>T  | Silent            | BCORL1  | p.A1496A | BCL6 corepressor-like     | 176 (0.00)  | 19 (0.58)  | 0.96 |
| 12-01 | Gp4 | g.chr22:23656186C>A  | Nonsense Mutation | BCR     | p.C1163* | breakpoint cluster regio  | 137 (0.00)  | 57 (0.16)  | 0.42 |
| 12-01 | Gp4 | g.chr11:205463C>G    | Missense Mutation | BET1L   | p.D59H   | Bet1 golgi vesicular me   | 33 (0.00)   | 53 (0.45)  | 1.21 |
| 12-01 | Gp4 | g.chr11:205632C>A    | Missense Mutation | BET1L   | p.Q49H   | Bet1 golgi vesicular me   | 38 (0.00)   | 82 (0.18)  | 0.49 |
| 12-01 | Gp4 | g.chr3:5024952G>T    | Nonsense Mutation | BHLHE40 | p.G272*  | basic helix-loop-helix fa | 151 (0.01)  | 32 (0.19)  | 0.50 |
| 12-01 | Gp4 | g.chr12:32481146C>T  | Missense Mutation | BICD1   | p.T586I  | bicaudal D homolog 1 (    | 1113 (0.00) | 95 (0.41)  | 1.09 |
| 12-01 | Gp4 | g.chr2:127828158C>T  | Missense Mutation | BIN1    | p.G96S   | bridging integrator 1     | 186 (0.00)  | 243 (0.28) | 0.75 |
| 12-01 | Gp4 | g.chr15:91261007C>A  | Intron            | BLM     |          | Bloom syndrome, RecQ      | 182 (0.00)  | 204 (0.49) | 1.29 |
| 12-01 | Gp4 | g.chr15:91261310G>A  | Intron            | BLM     |          | Bloom syndrome, RecQ      | 442 (0.00)  | 118 (0.75) | 2.01 |
| 12-01 | Gp4 | g.chr15:91262142G>T  | Intron            | BLM     |          | Bloom syndrome, RecQ      | 129 (0.00)  | 172 (0.16) | 0.42 |
| 12-01 | Gp4 | g.chr15:91291974C>A  | Intron            | BLM     |          | Bloom syndrome, RecQ      | 41 (0.00)   | 27 (0.19)  | 0.49 |
| 12-01 | Gp4 | g.chr15:91348301G>T  | Intron            | BLM     |          | Bloom syndrome, RecQ      | 82 (0.00)   | 33 (0.58)  | 1.54 |
| 12-01 | Gp4 | g.chr15:91348397G>T  | Intron            | BLM     |          | Bloom syndrome, RecQ      | 99 (0.00)   | 50 (0.36)  | 0.96 |
| 12-01 | Gp4 | g.chr15:91356923G>A  | Intron            | BLM     |          | Bloom syndrome, RecQ      | 67 (0.00)   | 138 (0.56) | 1.49 |
| 12-01 | Gp4 | g.chr7:43827622G>T   | Silent            | BLVRA   | p.S44S   | biliverdin reductase A    | 142 (0.00)  | 35 (0.74)  | 1.98 |
| 12-01 | Gp4 | g.chr8:22034109T>C   | Missense Mutation | BMP1    | p.F166S  | bone morphogenetic pro    | 67 (0.00)   | 25 (0.84)  | 2.24 |
| 12-01 | Gp4 | g.chr3:113002368G>T  | Missense Mutation | BOC     | p.A848S  | BOC cell adhesion asso    | 73 (0.00)   | 41 (0.80)  | 2.15 |
| 12-01 | Gp4 | g.chr4:13604192T>A   | Silent            | BOD1L1  | p.V1444V | biorientation of chromo   | 57 (0.00)   | 61 (0.44)  | 1.18 |
| 12-01 | Gp4 | g.chr2:74372373G>A   | Nonsense Mutation | BOLA3   | p.Q38*   | bolA family member 3      | 84 (0.00)   | 115 (0.22) | 0.58 |

|       |     |                      |                       |          |          |                                      |            |      |
|-------|-----|----------------------|-----------------------|----------|----------|--------------------------------------|------------|------|
| 12-01 | Gp4 | g.chr2:198593232C>T  | Missense Mutation     | BOLL     | p.D321N  | boule-like RNA-binding 176 (0.00)    | 25 (0.76)  | 2.03 |
| 12-01 | Gp4 | g.chr20:31606505G>T  | Missense Mutation     | BPIFB2   | p.L244F  | BPI fold containing fam 178 (0.00)   | 159 (0.35) | 0.94 |
| 12-01 | Gp4 | g.chr20:31671474C>A  | Silent                | BPIFB4   | p.I157I  | BPI fold containing fam 30 (0.00)    | 42 (0.19)  | 0.51 |
| 12-01 | Gp4 | g.chr13:32896748C>A  | Intron                | BRCA2    |          | breast cancer 2, early on 66 (0.00)  | 11 (0.91)  | 2.42 |
| 12-01 | Gp4 | g.chr13:32922870C>A  | Intron                | BRCA2    |          | breast cancer 2, early on 66 (0.00)  | 33 (0.39)  | 1.05 |
| 12-01 | Gp4 | g.chr13:32935136G>A  | Intron                | BRCA2    |          | breast cancer 2, early on 128 (0.00) | 15 (0.73)  | 1.96 |
| 12-01 | Gp4 | g.chr22:50217789G>C  | Missense Mutation     | BRD1     | p.I59M   | bromodomain containin 159 (0.00)     | 171 (0.18) | 0.47 |
| 12-01 | Gp4 | g.chr9:136899836C>G  | Missense Mutation     | BRD3     | p.K684N  | bromodomain containin 137 (0.00)     | 41 (0.56)  | 1.50 |
| 12-01 | Gp4 | g.chr3:9786728C>T    | Missense Mutation     | BRPF1    | p.P979L  | bromodomain and PHD 150 (0.00)       | 104 (0.15) | 0.41 |
| 12-01 | Gp4 | g.chr3:9787360T>A    | Missense Mutation     | BRPF1    | p.S1051T | bromodomain and PHD 70 (0.01)        | 71 (0.18)  | 0.49 |
| 12-01 | Gp4 | g.chr3:9787377C>T    | Silent                | BRPF1    | p.R1056R | bromodomain and PHD 65 (0.00)        | 63 (0.14)  | 0.38 |
| 12-01 | Gp4 | g.chr11:1459572C>A   | Missense Mutation     | BRSK2    | p.H75N   | BR serine/threonine kin 62 (0.00)    | 46 (0.48)  | 1.28 |
| 12-01 | Gp4 | g.chr21:40627701G>A  | Missense Mutation     | BRWD1    | p.R709C  | bromodomain and WD 179 (0.00)        | 49 (0.49)  | 1.31 |
| 12-01 | Gp4 | g.chr21:40667701C>A  | Missense Mutation     | BRWD1    | p.A193S  | bromodomain and WD 117 (0.00)        | 40 (0.38)  | 1.00 |
| 12-01 | Gp4 | g.chr3:49690477C>A   | Nonsense Mutation     | BSN      | p.S1163* | bassoon presynaptic cyto 58 (0.00)   | 291 (0.14) | 0.38 |
| 12-01 | Gp4 | g.chr10:124050595C>A | Splice Site           | BTBD16   | p.A159D  | BTB (POZ) domain con 63 (0.02)       | 20 (0.70)  | 1.87 |
| 12-01 | Gp4 | g.chr14:93708908G>A  | Missense Mutation     | BTBD7    | p.S1037L | BTB (POZ) domain con 242 (0.00)      | 22 (0.95)  | 2.55 |
| 12-01 | Gp4 | g.chr6:38142769G>T   | Missense Mutation     | BTBD9    | p.H581N  | BTB (POZ) domain con 105 (0.00)      | 51 (0.29)  | 0.78 |
| 12-01 | Gp4 | g.chr6:38142873G>C   | Missense Mutation     | BTBD9    | p.T546S  | BTB (POZ) domain con 51 (0.00)       | 19 (0.63)  | 1.68 |
| 12-01 | Gp4 | g.chr1:228699464G>C  | RNA                   | BTNL10   |          | butyrophilin-like 10 18 (0.00)       | 88 (0.25)  | 0.67 |
| 12-01 | Gp4 | g.chr10:124914611C>T | Silent                | BUB3     | p.L60L   | BUB3 mitotic checkpoi 44 (0.00)      | 15 (0.47)  | 1.24 |
| 12-01 | Gp4 | g.chr17:56389008G>T  | Missense Mutation     | BZRAP1   | p.P942Q  | benzodiazepine receptor 65 (0.00)    | 42 (0.45)  | 1.21 |
| 12-01 | Gp4 | g.chr10:50533734G>T  | Silent                | C10orf71 | p.L1048L | chromosome 10 open re 21 (0.00)      | 24 (0.25)  | 0.67 |
| 12-01 | Gp4 | g.chr10:124697365A>T | Missense Mutation     | C10orf88 | p.V320E  | chromosome 10 open re 36 (0.00)      | 15 (0.33)  | 0.89 |
| 12-01 | Gp4 | g.chr12:110511356G>T | De novo Start InFranc | C12orf76 |          | chromosome 12 open re 52 (0.00)      | 119 (0.50) | 1.34 |
| 12-01 | Gp4 | g.chr14:105461055C>T | Missense Mutation     | C14orf79 | p.R313C  | chromosome 14 open re 144 (0.00)     | 121 (0.69) | 1.83 |
| 12-01 | Gp4 | g.chr14:23465206C>G  | Missense Mutation     | C14orf93 | p.R290T  | chromosome 14 open re 72 (0.00)      | 200 (0.69) | 1.83 |
| 12-01 | Gp4 | g.chr15:41062991C>A  | Missense Mutation     | C15orf62 | p.P100T  | chromosome 15 open re 25 (0.00)      | 47 (0.36)  | 0.96 |
| 12-01 | Gp4 | g.chr16:31505033G>T  | Silent                | C16orf58 | p.V283V  | chromosome 16 open re 135 (0.00)     | 216 (0.22) | 0.59 |
| 12-01 | Gp4 | g.chr16:31505071G>T  | Missense Mutation     | C16orf58 | p.H271N  | chromosome 16 open re 105 (0.00)     | 243 (0.38) | 1.01 |
| 12-01 | Gp4 | g.chr16:2510921G>T   | Missense Mutation     | C16orf59 | p.D101Y  | chromosome 16 open re 98 (0.01)      | 232 (0.47) | 1.24 |
| 12-01 | Gp4 | g.chr16:4787830C>A   | Silent                | C16orf71 | p.I53I   | chromosome 16 open re 103 (0.00)     | 90 (0.79)  | 2.10 |
| 12-01 | Gp4 | g.chr16:30770738C>T  | Silent                | C16orf93 | p.L194L  | chromosome 16 open re 25 (0.00)      | 42 (0.83)  | 2.22 |
| 12-01 | Gp4 | g.chr17:79512837G>A  | Nonsense Mutation     | C17orf70 | p.R749*  | chromosome 17 open re 17 (0.00)      | 22 (0.55)  | 1.45 |
| 12-01 | Gp4 | g.chr17:72588212C>T  | Silent                | C17orf77 | p.S9S    | chromosome 17 open re 135 (0.00)     | 75 (0.29)  | 0.78 |

|       |     |                      |                   |          |          |                         |             |            |      |
|-------|-----|----------------------|-------------------|----------|----------|-------------------------|-------------|------------|------|
| 12-01 | Gp4 | g.chr17:3746432C>T   | Missense Mutation | C17orf85 | p.R66K   | chromosome 17 open re   | 92 (0.00)   | 24 (0.96)  | 2.56 |
| 12-01 | Gp4 | g.chr19:58485557G>A  | Nonsense Mutation | C19orf18 | p.Q46*   | chromosome 19 open re   | 94 (0.00)   | 102 (0.52) | 1.39 |
| 12-01 | Gp4 | g.chr1:34663074C>A   | Missense Mutation | C1orf94  | p.A190D  | chromosome 1 open rea   | 99 (0.00)   | 17 (0.47)  | 1.25 |
| 12-01 | Gp4 | g.chr1:22974231G>A   | Silent            | C1QC     | p.Q231Q  | complement component    | 162 (0.00)  | 66 (0.92)  | 2.46 |
| 12-01 | Gp4 | g.chr22:19431809C>T  | Silent            | C22orf39 | p.L99L   | chromosome 22 open re   | 65 (0.00)   | 84 (0.19)  | 0.51 |
| 12-01 | Gp4 | g.chr21:43338314G>A  | Missense Mutation | C2CD2    | p.A207V  | C2 calcium-dependent d  | 107 (0.00)  | 38 (0.34)  | 0.91 |
| 12-01 | Gp4 | g.chr11:118986739C>G | Silent            | C2CD2L   | p.S386S  | C2CD2-like              | 41 (0.00)   | 34 (0.15)  | 0.39 |
| 12-01 | Gp4 | g.chr2:29295108A>G   | Missense Mutation | C2orf71  | p.F674L  | chromosome 2 open rea   | 165 (0.00)  | 15 (0.33)  | 0.89 |
| 12-01 | Gp4 | g.chr19:6718162G>C   | Missense Mutation | C3       | p.I149M  | complement component    | 35 (0.00)   | 87 (0.41)  | 1.10 |
| 12-01 | Gp4 | g.chr3:128292344C>A  | Missense Mutation | C3orf27  | p.D77Y   | chromosome 3 open rea   | 33 (0.00)   | 44 (0.73)  | 1.94 |
| 12-01 | Gp4 | g.chr3:118865484T>C  | Silent            | C3orf30  | p.L150L  | chromosome 3 open rea   | 147 (0.00)  | 106 (0.27) | 0.73 |
| 12-01 | Gp4 | g.chr3:126915564G>T  | Missense Mutation | C3orf56  | p.Q12H   | chromosome 3 open rea   | 64 (0.00)   | 159 (0.16) | 0.44 |
| 12-01 | Gp4 | g.chr3:126915757G>T  | Missense Mutation | C3orf56  | p.A77S   | chromosome 3 open rea   | 156 (0.00)  | 122 (0.36) | 0.96 |
| 12-01 | Gp4 | g.chr3:126915858C>G  | Missense Mutation | C3orf56  | p.S110R  | chromosome 3 open rea   | 280 (0.00)  | 286 (0.18) | 0.48 |
| 12-01 | Gp4 | g.chr5:102611623G>A  | Start Codon SNP   | C5orf30  | p.M1I    | chromosome 5 open rea   | 29 (0.00)   | 55 (0.22)  | 0.58 |
| 12-01 | Gp4 | g.chr7:40899964C>T   | Silent            | C7orf10  | p.P408P  |                         | 166 (0.00)  | 123 (0.70) | 1.86 |
| 12-01 | Gp4 | g.chr7:99754797A>G   | Silent            | C7orf43  | p.D255D  | chromosome 7 open rea   | 132 (0.00)  | 78 (0.38)  | 1.03 |
| 12-01 | Gp4 | g.chr7:99754803G>A   | Silent            | C7orf43  | p.I253I  | chromosome 7 open rea   | 129 (0.00)  | 75 (0.51)  | 1.35 |
| 12-01 | Gp4 | g.chr8:96281283G>T   | Silent            | C8orf37  | p.A45A   | chromosome 8 open rea   | 145 (0.00)  | 61 (0.79)  | 2.10 |
| 12-01 | Gp4 | g.chr9:139379340G>C  | Missense Mutation | C9orf163 | p.R147T  | chromosome 9 open rea   | 55 (0.00)   | 72 (0.57)  | 1.52 |
| 12-01 | Gp4 | g.chr9:135763691T>C  | Missense Mutation | C9orf9   | p.V121A  | chromosome 9 open rea   | 51 (0.00)   | 35 (0.77)  | 2.06 |
| 12-01 | Gp4 | g.chr17:58236715C>A  | Missense Mutation | CA4      | p.P290Q  | carbonic anhydrase IV   | 33 (0.00)   | 100 (0.26) | 0.69 |
| 12-01 | Gp4 | g.chr9:136328678G>T  | Splice Site       | CACFD1   |          | calcium channel flower  | 43 (0.00)   | 20 (0.30)  | 0.80 |
| 12-01 | Gp4 | g.chr9:140919450G>T  | Missense Mutation | CACNA1B  | p.G1038C | calcium channel, voltag | 111 (0.00)  | 39 (0.23)  | 0.62 |
| 12-01 | Gp4 | g.chr12:2690912C>A   | Silent            | CACNA1C  | p.T684T  | calcium channel, voltag | 147 (0.00)  | 15 (0.40)  | 1.07 |
| 12-01 | Gp4 | g.chr1:181767706C>A  | Silent            | CACNA1E  | p.R2183R | calcium channel, voltag | 20 (0.00)   | 21 (0.38)  | 1.02 |
| 12-01 | Gp4 | g.chr1:201009822A>G  | Silent            | CACNA1S  | p.C1718C | calcium channel, voltag | 75 (0.01)   | 112 (0.21) | 0.57 |
| 12-01 | Gp4 | g.chr1:201043694T>A  | Missense Mutation | CACNA1S  | p.E668V  | calcium channel, voltag | 95 (0.00)   | 35 (0.17)  | 0.46 |
| 12-01 | Gp4 | g.chr17:65050143C>A  | Missense Mutation | CACNG1   | p.N87K   | calcium channel, voltag | 66 (0.00)   | 24 (0.25)  | 0.67 |
| 12-01 | Gp4 | g.chr17:64881354C>G  | Missense Mutation | CACNG5   | p.C275W  | calcium channel, voltag | 83 (0.00)   | 92 (0.71)  | 1.88 |
| 12-01 | Gp4 | g.chr3:85081495G>A   | Intron            | CADM2    |          | cell adhesion molecule  | 2114 (0.01) | 85 (0.25)  | 0.66 |
| 12-01 | Gp4 | g.chr3:85265256G>A   | Intron            | CADM2    |          | cell adhesion molecule  | 237 (0.00)  | 21 (0.90)  | 2.41 |
| 12-01 | Gp4 | g.chr3:85340415C>A   | Intron            | CADM2    |          | cell adhesion molecule  | 234 (0.00)  | 13 (0.54)  | 1.44 |
| 12-01 | Gp4 | g.chr3:85397224T>C   | Intron            | CADM2    |          | cell adhesion molecule  | 2157 (0.00) | 126 (0.46) | 1.23 |
| 12-01 | Gp4 | g.chr3:85468339C>A   | Intron            | CADM2    |          | cell adhesion molecule  | 2141 (0.00) | 132 (0.39) | 1.03 |

|       |     |                      |                   |          |          |                                    |            |            |      |
|-------|-----|----------------------|-------------------|----------|----------|------------------------------------|------------|------------|------|
| 12-01 | Gp4 | g.chr3:85470335T>A   | Intron            | CADM2    |          | cell adhesion molecule 2131 (0.00) | 68 (0.49)  | 1.29       |      |
| 12-01 | Gp4 | g.chr3:85470343T>A   | Intron            | CADM2    |          | cell adhesion molecule 2127 (0.00) | 62 (0.47)  | 1.25       |      |
| 12-01 | Gp4 | g.chr3:85553123T>C   | Intron            | CADM2    |          | cell adhesion molecule 292 (0.01)  | 24 (0.54)  | 1.44       |      |
| 12-01 | Gp4 | g.chr3:85652795A>T   | Intron            | CADM2    |          | cell adhesion molecule 272 (0.00)  | 25 (0.32)  | 0.85       |      |
| 12-01 | Gp4 | g.chr3:85839843G>T   | Intron            | CADM2    |          | cell adhesion molecule 2134 (0.00) | 76 (0.75)  | 2.00       |      |
| 12-01 | Gp4 | g.chr3:85910038G>T   | Intron            | CADM2    |          | cell adhesion molecule 227 (0.00)  | 92 (0.52)  | 1.39       |      |
| 12-01 | Gp4 | g.chr3:85939302A>T   | Intron            | CADM2    |          | cell adhesion molecule 223 (0.00)  | 22 (0.41)  | 1.09       |      |
| 12-01 | Gp4 | g.chr3:86017180G>T   | Intron            | CADM2    |          | cell adhesion molecule 2113 (0.00) | 21 (0.33)  | 0.89       |      |
| 12-01 | Gp4 | g.chr3:86073299T>A   | Intron            | CADM2    |          | cell adhesion molecule 222 (0.00)  | 114 (0.35) | 0.94       |      |
| 12-01 | Gp4 | g.chr7:128399029G>T  | Nonsense Mutation | CALU     | p.E174*  | calumenin                          | 300 (0.00) | 44 (0.30)  | 0.79 |
| 12-01 | Gp4 | g.chr10:75583809C>A  | Missense Mutation | CAMK2G   | p.D342Y  | calcium/calmodulin-dep             | 112 (0.00) | 93 (0.23)  | 0.60 |
| 12-01 | Gp4 | g.chr9:138709867C>T  | Silent            | CAMSAP1  | p.T1409T | calmodulin regulated sp            | 121 (0.00) | 125 (0.40) | 1.07 |
| 12-01 | Gp4 | g.chr1:7723585G>C    | Missense Mutation | CAMTA1   | p.R326S  | calmodulin binding tran            | 140 (0.00) | 105 (0.42) | 1.12 |
| 12-01 | Gp4 | g.chr2:241533998C>A  | Missense Mutation | CAPN10   | p.S290Y  | calpain 10                         | 216 (0.00) | 249 (0.16) | 0.43 |
| 12-01 | Gp4 | g.chr2:203818807C>T  | Silent            | CARF     | p.Y67Y   | calcium responsive tran            | 41 (0.02)  | 138 (0.99) | 2.63 |
| 12-01 | Gp4 | g.chr13:111287909G>T | Missense Mutation | CARKD    | p.R249L  | carbohydrate kinase don            | 47 (0.00)  | 138 (0.20) | 0.54 |
| 12-01 | Gp4 | g.chr19:11024585C>T  | Silent            | CARM1    | p.R234R  | coactivator-associated a           | 90 (0.00)  | 181 (0.19) | 0.52 |
| 12-01 | Gp4 | g.chr16:2240150C>A   | Silent            | CASKIN1  | p.A56A   | CASK interacting protei            | 23 (0.00)  | 27 (0.30)  | 0.79 |
| 12-01 | Gp4 | g.chr20:55012382C>T  | Missense Mutation | CASS4    | p.R67C   | Cas scaffolding protein            | 93 (0.00)  | 348 (0.39) | 1.03 |
| 12-01 | Gp4 | g.chr19:38853198G>A  | Silent            | CATSPERG | p.R780R  | catsper channel auxiliar           | 40 (0.00)  | 126 (0.62) | 1.65 |
| 12-01 | Gp4 | g.chr21:44485369C>A  | Missense Mutation | CBS      | p.S227I  | cystathionine-beta-synt            | 106 (0.00) | 25 (0.20)  | 0.53 |
| 12-01 | Gp4 | g.chr17:77809072G>A  | Silent            | CBX4     | p.N123N  | chromobox homolog 4                | 42 (0.02)  | 150 (0.45) | 1.19 |
| 12-01 | Gp4 | g.chr1:52824943G>C   | Missense Mutation | CC2D1B   | p.P369A  | coiled-coil and C2 dom             | 33 (0.00)  | 182 (0.18) | 0.48 |
| 12-01 | Gp4 | g.chr1:52828337C>G   | Missense Mutation | CC2D1B   | p.E51Q   | coiled-coil and C2 dom             | 148 (0.00) | 172 (0.22) | 0.57 |
| 12-01 | Gp4 | g.chr8:22473642G>T   | Nonsense Mutation | CCAR2    | p.E576*  | cell cycle and apoptosis           | 202 (0.00) | 377 (0.36) | 0.96 |
| 12-01 | Gp4 | g.chr9:131597777G>A  | Missense Mutation | CCBL1    | p.T342I  | cysteine conjugate-beta            | 84 (0.00)  | 140 (0.36) | 0.95 |
| 12-01 | Gp4 | g.chr19:15133778C>A  | Nonsense Mutation | CCDC105  | p.C449*  | coiled-coil domain cont            | 20 (0.00)  | 76 (0.92)  | 2.46 |
| 12-01 | Gp4 | g.chr4:186380382T>C  | Silent            | CCDC110  | p.L453L  | coiled-coil domain cont            | 18 (0.00)  | 20 (0.30)  | 0.80 |
| 12-01 | Gp4 | g.chr5:205810G>A     | Nonsense Mutation | CCDC127  | p.Q129*  | coiled-coil domain cont            | 149 (0.00) | 120 (0.79) | 2.11 |
| 12-01 | Gp4 | g.chr5:206008T>C     | Missense Mutation | CCDC127  | p.T63A   | coiled-coil domain cont            | 52 (0.00)  | 23 (0.22)  | 0.58 |
| 12-01 | Gp4 | g.chr3:42754685G>T   | Silent            | CCDC13   | p.A614A  | coiled-coil domain cont            | 88 (0.00)  | 56 (0.39)  | 1.05 |
| 12-01 | Gp4 | g.chr22:42221756C>T  | Nonsense Mutation | CCDC134  | p.R207*  | coiled-coil domain cont            | 87 (0.00)  | 72 (0.18)  | 0.48 |
| 12-01 | Gp4 | g.chr7:128457886G>A  | Nonsense Mutation | CCDC136  | p.W507*  | coiled-coil domain cont            | 311 (0.00) | 15 (0.73)  | 1.96 |
| 12-01 | Gp4 | g.chr2:109405307G>A  | Splice Site       | CCDC138  |          | coiled-coil domain cont            | 168 (0.00) | 27 (0.93)  | 2.47 |
| 12-01 | Gp4 | g.chr1:3673374C>A    | Missense Mutation | CCDC27   | p.P211T  | coiled-coil domain cont            | 30 (0.00)  | 303 (0.18) | 0.49 |

|       |     |                      |                   |          |          |                           |            |            |      |
|-------|-----|----------------------|-------------------|----------|----------|---------------------------|------------|------------|------|
| 12-01 | Gp4 | g.chr10:12940485C>A  | Missense Mutation | CCDC3    | p.K248N  | coiled-coil domain cont:  | 78 (0.00)  | 58 (0.67)  | 1.79 |
| 12-01 | Gp4 | g.chr15:74623047G>T  | Missense Mutation | CCDC33   | p.K500N  | coiled-coil domain cont:  | 56 (0.00)  | 9 (0.67)   | 1.78 |
| 12-01 | Gp4 | g.chr17:78055545T>C  | Missense Mutation | CCDC40   | p.L588P  | coiled-coil domain cont:  | 62 (0.00)  | 15 (0.60)  | 1.60 |
| 12-01 | Gp4 | g.chr3:48474523C>A   | Missense Mutation | CCDC51   | p.E177D  | coiled-coil domain cont:  | 109 (0.00) | 41 (0.39)  | 1.04 |
| 12-01 | Gp4 | g.chr12:49310829A>T  | Missense Mutation | CCDC65   | p.I183L  | coiled-coil domain cont:  | 34 (0.00)  | 13 (0.38)  | 1.03 |
| 12-01 | Gp4 | g.chr2:130899949G>T  | Missense Mutation | CCDC74B  | p.P101T  | coiled-coil domain cont:  | 33 (0.00)  | 27 (0.67)  | 1.78 |
| 12-01 | Gp4 | g.chr3:112356993T>C  | Missense Mutation | CCDC80   | p.K587R  | coiled-coil domain cont:  | 69 (0.00)  | 12 (0.50)  | 1.33 |
| 12-01 | Gp4 | g.chr3:112358193A>G  | Missense Mutation | CCDC80   | p.I187T  | coiled-coil domain cont:  | 181 (0.00) | 164 (0.23) | 0.60 |
| 12-01 | Gp4 | g.chr11:66359184G>T  | Missense Mutation | CCDC87   | p.L435I  | coiled-coil domain cont:  | 131 (0.01) | 75 (0.60)  | 1.60 |
| 12-01 | Gp4 | g.chr11:66359736C>T  | Missense Mutation | CCDC87   | p.E251K  | coiled-coil domain cont:  | 77 (0.00)  | 141 (0.57) | 1.53 |
| 12-01 | Gp4 | g.chr11:66360217C>A  | Missense Mutation | CCDC87   | p.E90D   | coiled-coil domain cont:  | 60 (0.00)  | 103 (0.19) | 0.52 |
| 12-01 | Gp4 | g.chr11:64108922C>G  | Missense Mutation | CCDC88B  | p.H159Q  | coiled-coil domain cont:  | 80 (0.00)  | 111 (0.53) | 1.42 |
| 12-01 | Gp4 | g.chr14:91779598G>C  | Silent            | CCDC88C  | p.V854V  | coiled-coil domain cont:  | 136 (0.00) | 218 (0.44) | 1.17 |
| 12-01 | Gp4 | g.chr6:31118579C>T   | Missense Mutation | CCHCR1   | p.V342I  | coiled-coil alpha-helical | 263 (0.00) | 623 (0.15) | 0.40 |
| 12-01 | Gp4 | g.chr1:1322697G>T    | Missense Mutation | CCNL2    | p.Q493K  | cyclin L2                 | 51 (0.00)  | 38 (0.42)  | 1.12 |
| 12-01 | Gp4 | g.chr10:35857984C>A  | Silent            | CCNY     | p.A304A  | cyclin Y                  | 126 (0.00) | 23 (0.30)  | 0.81 |
| 12-01 | Gp4 | g.chr1:167407822C>A  | Missense Mutation | CD247    | p.E95D   | CD247 molecule            | 151 (0.00) | 52 (0.21)  | 0.56 |
| 12-01 | Gp4 | g.chr15:73994877A>T  | Missense Mutation | CD276    | p.T121S  | CD276 molecule            | 30 (0.00)  | 29 (0.59)  | 1.56 |
| 12-01 | Gp4 | g.chr19:8367431G>T   | Silent            | CD320    | p.A255A  | CD320 molecule            | 76 (0.00)  | 81 (0.22)  | 0.59 |
| 12-01 | Gp4 | g.chr19:8367485C>A   | Silent            | CD320    | p.V237V  | CD320 molecule            | 76 (0.00)  | 104 (0.32) | 0.85 |
| 12-01 | Gp4 | g.chr11:118178017C>T | Nonsense Mutation | CD3E     | p.Q22*   | CD3e molecule, epsilon    | 32 (0.00)  | 15 (0.87)  | 2.31 |
| 12-01 | Gp4 | g.chr17:7484696G>T   | Splice Site       | CD68     | p.S311I  | CD68 molecule             | 196 (0.00) | 139 (0.20) | 0.54 |
| 12-01 | Gp4 | g.chr19:14516700C>A  | Silent            | CD97     | p.L590L  | CD97 molecule             | 76 (0.01)  | 164 (0.22) | 0.59 |
| 12-01 | Gp4 | g.chr17:45234397G>A  | Missense Mutation | CDC27    | p.P242S  | cell division cycle 27    | 38 (0.00)  | 22 (0.64)  | 1.70 |
| 12-01 | Gp4 | g.chr8:25364876G>A   | Silent            | CDCA2    | p.K898K  | cell division cycle assoc | 49 (0.00)  | 128 (0.20) | 0.54 |
| 12-01 | Gp4 | g.chr10:73490328G>C  | Missense Mutation | CDH23    | p.V1233L | cadherin-related 23       | 32 (0.00)  | 75 (0.23)  | 0.60 |
| 12-01 | Gp4 | g.chr10:73563067G>T  | Nonsense Mutation | CDH23    | p.E2593* | cadherin-related 23       | 74 (0.00)  | 101 (0.38) | 1.00 |
| 12-01 | Gp4 | g.chr10:73571307G>T  | Missense Mutation | CDH23    | p.A3085S | cadherin-related 23       | 74 (0.00)  | 291 (0.17) | 0.45 |
| 12-01 | Gp4 | g.chr3:49836530C>A   | Missense Mutation | CDHR4    | p.Q100H  | cadherin-related family   | 87 (0.00)  | 97 (0.51)  | 1.35 |
| 12-01 | Gp4 | g.chr1:1636385G>T    | Missense Mutation | CDK11A   | p.N462K  | cyclin-dependent kinase   | 171 (0.00) | 18 (0.33)  | 0.89 |
| 12-01 | Gp4 | g.chr17:37667845G>A  | Silent            | CDK12    | p.E910E  | cyclin-dependent kinase   | 34 (0.00)  | 17 (0.82)  | 2.20 |
| 12-01 | Gp4 | g.chr9:123171416C>T  | Silent            | CDK5RAP2 | p.Q1531Q | CDK5 regulatory subun     | 55 (0.00)  | 56 (0.73)  | 1.95 |
| 12-01 | Gp4 | g.chr9:21970587C>A   | Intron            | CDKN2A   |          | cyclin-dependent kinase   | 163 (0.00) | 350 (0.30) | 0.80 |
| 12-01 | Gp4 | g.chr19:43023273C>T  | Missense Mutation | CEACAM1  | p.R358H  | carcinoembryonic antigen  | 26 (0.00)  | 53 (0.36)  | 0.96 |
| 12-01 | Gp4 | g.chr19:45211335G>A  | Silent            | CEACAM16 | p.V381V  | carcinoembryonic antigen  | 64 (0.02)  | 25 (0.20)  | 0.67 |

|       |     |                      |                   |          |          |                          |               |            |      |
|-------|-----|----------------------|-------------------|----------|----------|--------------------------|---------------|------------|------|
| 12-01 | Gp4 | g.chr19:45185857C>A  | Missense Mutation | CEACAM19 | p.H271N  | carcinoembryonic antigen | 27 (0.00)     | 25 (0.20)  | 0.67 |
| 12-01 | Gp4 | g.chr22:18028306G>C  | Missense Mutation | CECR2    | p.G946A  | cat eye syndrome chrom   | 136 (0.00)    | 23 (0.35)  | 0.93 |
| 12-01 | Gp4 | g.chr22:46782336C>A  | Silent            | CELSR1   | p.T2234T | cadherin, EGF LAG sev    | 29 (0.00)     | 31 (0.29)  | 0.77 |
| 12-01 | Gp4 | g.chr1:109794179T>G  | Missense Mutation | CELSR2   | p.V493G  | cadherin, EGF LAG sev    | 177 (0.01)    | 28 (0.18)  | 0.48 |
| 12-01 | Gp4 | g.chr1:109794380G>T  | Missense Mutation | CELSR2   | p.G560V  | cadherin, EGF LAG sev    | 184 (0.00)    | 11 (0.55)  | 1.45 |
| 12-01 | Gp4 | g.chr1:109812340G>A  | Silent            | CELSR2   | p.S2335S | cadherin, EGF LAG sev    | 90 (0.00)     | 87 (0.23)  | 0.61 |
| 12-01 | Gp4 | g.chr1:109815899C>A  | Missense Mutation | CELSR2   | p.A2817D | cadherin, EGF LAG sev    | 175 (0.00)    | 69 (0.16)  | 0.43 |
| 12-01 | Gp4 | g.chr3:48698833C>T   | Missense Mutation | CELSR3   | p.R412H  | cadherin, EGF LAG sev    | 60 (0.00)     | 87 (0.16)  | 0.43 |
| 12-01 | Gp4 | g.chr1:3732008G>T    | Silent            | CEP104   | p.G912G  | centrosomal protein      | 10443 (0.00)  | 89 (0.24)  | 0.63 |
| 12-01 | Gp4 | g.chr11:117246437G>T | Missense Mutation | CEP164   | p.R416L  | centrosomal protein      | 164338 (0.00) | 111 (0.31) | 0.82 |
| 12-01 | Gp4 | g.chr14:105360133C>A | Silent            | CEP170B  | p.S1406S | centrosomal protein      | 17064 (0.00)  | 63 (0.43)  | 1.14 |
| 12-01 | Gp4 | g.chr1:179983300G>C  | Missense Mutation | CEP350   | p.R571T  | centrosomal protein      | 35029 (0.00)  | 53 (0.26)  | 0.70 |
| 12-01 | Gp4 | g.chr2:65299081C>A   | Missense Mutation | CEP68    | p.P284Q  | centrosomal protein      | 68k149 (0.00) | 98 (0.18)  | 0.49 |
| 12-01 | Gp4 | g.chr2:65299570C>A   | Nonsense Mutation | CEP68    | p.S447*  | centrosomal protein      | 68k70 (0.00)  | 167 (0.17) | 0.45 |
| 12-01 | Gp4 | g.chr3:101484353T>A  | Nonsense Mutation | CEP97    | p.C793*  | centrosomal protein      | 97k56 (0.00)  | 34 (0.35)  | 0.94 |
| 12-01 | Gp4 | g.chr1:151491246G>T  | Missense Mutation | CGN      | p.G84V   | cingulin                 | 43 (0.00)     | 57 (0.28)  | 0.75 |
| 12-01 | Gp4 | g.chr22:41631235C>A  | Missense Mutation | CHADL    | p.A726S  | chondroadherin-like      | 23 (0.00)     | 81 (0.16)  | 0.43 |
| 12-01 | Gp4 | g.chr17:7806693G>T   | Missense Mutation | CHD3     | p.R1259I | chromodomain helicase    | 52 (0.02)     | 174 (0.80) | 2.15 |
| 12-01 | Gp4 | g.chr1:6175847C>A    | Intron            | CHD5     |          | chromodomain helicase    | 154 (0.00)    | 64 (0.47)  | 1.25 |
| 12-01 | Gp4 | g.chr1:6186649G>T    | Missense Mutation | CHD5     | p.A1354D | chromodomain helicase    | 37 (0.00)     | 156 (0.14) | 0.38 |
| 12-01 | Gp4 | g.chr1:6190747C>A    | Intron            | CHD5     |          | chromodomain helicase    | 20 (0.00)     | 80 (0.21)  | 0.57 |
| 12-01 | Gp4 | g.chr1:6196982C>G    | Intron            | CHD5     |          | chromodomain helicase    | 85 (0.00)     | 91 (0.19)  | 0.50 |
| 12-01 | Gp4 | g.chr1:6202910G>A    | Intron            | CHD5     |          | chromodomain helicase    | 19 (0.00)     | 80 (0.94)  | 2.50 |
| 12-01 | Gp4 | g.chr1:6202938C>A    | Intron            | CHD5     |          | chromodomain helicase    | 33 (0.00)     | 94 (0.34)  | 0.91 |
| 12-01 | Gp4 | g.chr1:6204081C>A    | Intron            | CHD5     |          | chromodomain helicase    | 107 (0.00)    | 29 (0.28)  | 0.74 |
| 12-01 | Gp4 | g.chr1:6204837G>T    | Intron            | CHD5     |          | chromodomain helicase    | 53 (0.00)     | 62 (0.82)  | 2.19 |
| 12-01 | Gp4 | g.chr1:6206859C>A    | Missense Mutation | CHD5     | p.V486L  | chromodomain helicase    | 23 (0.00)     | 66 (0.30)  | 0.81 |
| 12-01 | Gp4 | g.chr1:6213765C>A    | Intron            | CHD5     |          | chromodomain helicase    | 39 (0.00)     | 48 (0.15)  | 0.39 |
| 12-01 | Gp4 | g.chr1:6225459C>A    | Intron            | CHD5     |          | chromodomain helicase    | 72 (0.01)     | 132 (0.38) | 1.01 |
| 12-01 | Gp4 | g.chr1:6225712C>A    | Intron            | CHD5     |          | chromodomain helicase    | 52 (0.00)     | 41 (0.24)  | 0.65 |
| 12-01 | Gp4 | g.chr1:6228372G>C    | Intron            | CHD5     |          | chromodomain helicase    | 226 (0.00)    | 150 (0.25) | 0.66 |
| 12-01 | Gp4 | g.chr1:6236762C>A    | Intron            | CHD5     |          | chromodomain helicase    | 50 (0.00)     | 111 (0.37) | 0.98 |
| 12-01 | Gp4 | g.chr1:6236820C>T    | Intron            | CHD5     |          | chromodomain helicase    | 60 (0.02)     | 117 (0.48) | 1.28 |
| 12-01 | Gp4 | g.chr14:21899231A>G  | Missense Mutation | CHD8     | p.V191A  | chromodomain helicase    | 174 (0.00)    | 182 (0.60) | 1.60 |
| 12-01 | Gp4 | g.chr2:175666458C>A  | Silent            | CHN1     | p.R395R  | chimerin 1               | 64 (0.00)     | 18 (0.72)  | 1.93 |

|       |     |                      |                   |         |          |                           |            |            |      |
|-------|-----|----------------------|-------------------|---------|----------|---------------------------|------------|------------|------|
| 12-01 | Gp4 | g.chr16:23767003G>T  | Missense Mutation | CHP2    | p.R30L   | calcineurin-like EF-hand  | 32 (0.00)  | 14 (0.57)  | 1.52 |
| 12-01 | Gp4 | g.chr2:220404158G>A  | Nonsense Mutation | CHPF    | p.R759*  | chondroitin polymerizin   | 35 (0.00)  | 32 (0.31)  | 0.83 |
| 12-01 | Gp4 | g.chr3:184102977C>A  | Missense Mutation | CHRD    | p.P590H  | chordin                   | 139 (0.00) | 177 (0.19) | 0.50 |
| 12-01 | Gp4 | g.chr11:74415590C>A  | Missense Mutation | CHRDL2  | p.R231I  | chordin-like 2            | 139 (0.00) | 99 (0.26)  | 0.70 |
| 12-01 | Gp4 | g.chr1:240071404C>T  | Missense Mutation | CHRM3   | p.P218L  | cholinergic receptor, mu  | 190 (0.01) | 78 (0.97)  | 2.60 |
| 12-01 | Gp4 | g.chr15:78894182C>G  | Missense Mutation | CHRNA3  | p.D268H  | cholinergic receptor, nic | 66 (0.00)  | 72 (0.62)  | 1.67 |
| 12-01 | Gp4 | g.chr2:233409184G>A  | Nonsense Mutation | CHRNA3  | p.W381*  | cholinergic receptor, nic | 67 (0.00)  | 177 (0.23) | 0.62 |
| 12-01 | Gp4 | g.chr10:125805347G>A | Missense Mutation | CHST15  | p.P128S  | carbohydrate (N-acetylgl  | 182 (0.00) | 40 (0.15)  | 0.40 |
| 12-01 | Gp4 | g.chr16:844115G>T    | Missense Mutation | CHTF18  | p.A622S  | CTF18, chromosome tra     | 96 (0.00)  | 83 (0.39)  | 1.03 |
| 12-01 | Gp4 | g.chr18:12264364G>A  | Missense Mutation | CIDEA   | p.G81D   | cell death-inducing DFF   | 43 (0.00)  | 9 (0.89)   | 2.37 |
| 12-01 | Gp4 | g.chr18:12274154C>A  | Missense Mutation | CIDEA   | p.F131L  | cell death-inducing DFF   | 20 (0.00)  | 51 (0.18)  | 0.47 |
| 12-01 | Gp4 | g.chr16:11000509G>T  | Missense Mutation | CIITA   | p.W387L  | class II, major histocom  | 24 (0.00)  | 26 (0.50)  | 1.33 |
| 12-01 | Gp4 | g.chr15:65499141C>T  | Missense Mutation | CILP    | p.V135I  | cartilage intermediate la | 59 (0.00)  | 67 (0.99)  | 2.63 |
| 12-01 | Gp4 | g.chr19:1271421G>T   | Missense Mutation | CIRBP   | p.G102C  | cold inducible RNA bin    | 20 (0.00)  | 197 (0.19) | 0.51 |
| 12-01 | Gp4 | g.chr12:106633584C>G | Missense Mutation | CKAP4   | p.D343H  | cytoskeleton-associated   | 22 (0.00)  | 32 (0.25)  | 0.67 |
| 12-01 | Gp4 | g.chr11:46806088C>T  | Missense Mutation | CKAP5   | p.A702T  | cytoskeleton associated   | 161 (0.00) | 111 (0.84) | 2.23 |
| 12-01 | Gp4 | g.chr19:40222116G>A  | Silent            | CLC     | p.T111T  | Charcot-Leyden crystal    | 78 (0.00)  | 23 (0.91)  | 2.43 |
| 12-01 | Gp4 | g.chr14:95670650G>T  | Missense Mutation | CLMN    | p.P346T  | calmin (calponin-like, tr | 122 (0.00) | 14 (0.79)  | 2.10 |
| 12-01 | Gp4 | g.chr1:9794180C>T    | Missense Mutation | CLSTN1  | p.E711K  | calsyntenin 1             | 35 (0.00)  | 55 (0.16)  | 0.44 |
| 12-01 | Gp4 | g.chr16:3580616G>T   | Missense Mutation | CLUAP1  | p.S326I  | clusterin associated prot | 52 (0.00)  | 122 (0.29) | 0.77 |
| 12-01 | Gp4 | g.chr18:72228192G>C  | Silent            | CNDP1   | p.V92V   | carnosine dipeptidase 1   | 58 (0.00)  | 40 (0.20)  | 0.53 |
| 12-01 | Gp4 | g.chr18:72178216G>A  | Missense Mutation | CNDP2   | p.G209S  | CNDP dipeptidase 2 (m     | 66 (0.00)  | 90 (0.33)  | 0.89 |
| 12-01 | Gp4 | g.chr1:224804942C>T  | Silent            | CNIH3   | p.F22F   | cornichon family AMP      | 65 (0.00)  | 19 (0.68)  | 1.82 |
| 12-01 | Gp4 | g.chr2:220037524G>T  | Nonsense Mutation | CNPPD1  | p.C339*  | cyclin Pas1/PHO80 dor     | 16 (0.00)  | 100 (0.20) | 0.53 |
| 12-01 | Gp4 | g.chr1:24201300C>G   | Missense Mutation | CNR2    | p.A270P  | cannabinoid receptor 2    | 28 (0.00)  | 33 (0.76)  | 2.02 |
| 12-01 | Gp4 | g.chr1:246811195C>A  | Silent            | CNST    | p.S564S  | consortin, connexin sort  | 85 (0.00)  | 30 (0.93)  | 2.49 |
| 12-01 | Gp4 | g.chr3:3084072T>C    | Missense Mutation | CNTN4   | p.L826P  | contactin 4               | 31 (0.00)  | 51 (0.20)  | 0.52 |
| 12-01 | Gp4 | g.chr16:76587202T>G  | Missense Mutation | CNTNAP4 | p.D1158E | contactin associated pro  | 132 (0.00) | 46 (0.37)  | 0.41 |
| 12-01 | Gp4 | g.chr7:51096038G>C   | Missense Mutation | COBL    | p.H919D  | cordons-bleu WH2 repea    | 128 (0.01) | 74 (0.51)  | 1.37 |
| 12-01 | Gp4 | g.chr7:51096171C>A   | Missense Mutation | COBL    | p.K874N  | cordons-bleu WH2 repea    | 194 (0.00) | 156 (0.17) | 0.46 |
| 12-01 | Gp4 | g.chr7:51096182C>A   | Missense Mutation | COBL    | p.A871S  | cordons-bleu WH2 repea    | 191 (0.00) | 155 (0.17) | 0.46 |
| 12-01 | Gp4 | g.chr16:70530276G>T  | Missense Mutation | COG4    | p.Q514K  | component of oligomeri    | 105 (0.00) | 53 (0.42)  | 1.11 |
| 12-01 | Gp4 | g.chr6:116441778A>T  | Missense Mutation | COL10A1 | p.S501T  | collagen, type X, alpha   | 104 (0.00) | 44 (0.16)  | 0.42 |
| 12-01 | Gp4 | g.chr1:32119206G>T   | Missense Mutation | COL16A1 | p.P1536T | collagen, type XVI, alpl  | 111 (0.00) | 124 (0.71) | 1.89 |
| 12-01 | Gp4 | g.chr1:32119510G>T   | Missense Mutation | COL16A1 | p.Q1498K | collagen, type XVI, alpl  | 44 (0.00)  | 346 (0.28) | 0.74 |

|       |     |                      |                   |           |          |                                           |            |      |
|-------|-----|----------------------|-------------------|-----------|----------|-------------------------------------------|------------|------|
| 12-01 | Gp4 | g.chr9:116930426C>A  | Missense Mutation | COL27A1   | p.F197L  | collagen, type XXVII, a 117 (0.00)        | 16 (0.38)  | 1.00 |
| 12-01 | Gp4 | g.chr12:48369152G>T  | Missense Mutation | COL2A1    | p.N1278K | collagen, type II, alpha 1143 (0.00)      | 228 (0.25) | 0.68 |
| 12-01 | Gp4 | g.chr12:48369836G>C  | Silent            | COL2A1    | p.V1169V | collagen, type II, alpha 1160 (0.02)      | 28 (0.54)  | 1.43 |
| 12-01 | Gp4 | g.chr12:48379370C>A  | Splice Site       | COL2A1    | p.G561C  | collagen, type II, alpha 1160 (0.00)      | 226 (0.31) | 0.83 |
| 12-01 | Gp4 | g.chr19:10087958C>A  | Splice Site       | COL5A3    | p.G1079W | collagen, type V, alpha 1130 (0.00)       | 167 (0.72) | 1.92 |
| 12-01 | Gp4 | g.chr3:130368301G>T  | Silent            | COL6A6    | p.A1876A | collagen, type VI, alpha 31 (0.00)        | 10 (0.70)  | 1.87 |
| 12-01 | Gp4 | g.chr3:48605162G>C   | Missense Mutation | COL7A1    | p.A2655G | collagen, type VII, alpha 104 (0.00)      | 281 (0.41) | 1.08 |
| 12-01 | Gp4 | g.chr3:48619924C>A   | Missense Mutation | COL7A1    | p.R1529L | collagen, type VII, alpha 55 (0.00)       | 97 (0.27)  | 0.71 |
| 12-01 | Gp4 | g.chr11:14490271G>T  | Missense Mutation | COPB1     | p.Q701K  | coatomer protein complex 82 (0.00)        | 23 (0.22)  | 0.58 |
| 12-01 | Gp4 | g.chr19:19023796C>A  | Silent            | COPE      | p.A62A   | coatomer protein complex 47 (0.00)        | 100 (0.19) | 0.51 |
| 12-01 | Gp4 | g.chr19:19023829C>A  | Missense Mutation | COPE      | p.E51D   | coatomer protein complex 45 (0.00)        | 94 (0.22)  | 0.60 |
| 12-01 | Gp4 | g.chr6:99828181G>A   | Silent            | COQ3      | p.T90T   | coenzyme Q3 methyltransferase 39 (0.00)   | 48 (0.75)  | 2.00 |
| 12-01 | Gp4 | g.chr16:4409487G>T   | Silent            | CORO7     | p.T748T  | coronin 7 43 (0.00)                       | 86 (0.15)  | 0.40 |
| 12-01 | Gp4 | g.chr16:4409538G>T   | Silent            | CORO7     | p.P731P  | coronin 7 29 (0.00)                       | 22 (0.68)  | 1.82 |
| 12-01 | Gp4 | g.chr17:14095376A>T  | Missense Mutation | COX10     | p.N256Y  | cytochrome c oxidase subunit 403 (0.00)   | 96 (0.17)  | 0.44 |
| 12-01 | Gp4 | g.chr17:14110285G>C  | Missense Mutation | COX10     | p.A363P  | cytochrome c oxidase subunit 69 (0.00)    | 62 (0.24)  | 0.65 |
| 12-01 | Gp4 | g.chr17:13928606T>G  | RNA               | COX10-AS1 |          | COX10 antisense RNA 25 (0.00)             | 62 (0.24)  | 0.65 |
| 12-01 | Gp4 | g.chr6:75950975G>A   | Missense Mutation | COX7A2    | p.R9C    | cytochrome c oxidase subunit 55 (0.00)    | 31 (0.23)  | 0.60 |
| 12-01 | Gp4 | g.chr19:17025496C>A  | Missense Mutation | CPAMD8    | p.V1300L | C3 and PZP-like, alpha-55 (0.00)          | 45 (0.24)  | 0.65 |
| 12-01 | Gp4 | g.chr19:17057993C>T  | Silent            | CPAMD8    | p.G898G  | C3 and PZP-like, alpha-65 (0.00)          | 49 (0.14)  | 0.38 |
| 12-01 | Gp4 | g.chr19:17120112C>A  | Splice Site       | CPAMD8    |          | C3 and PZP-like, alpha-83 (0.00)          | 88 (0.65)  | 1.73 |
| 12-01 | Gp4 | g.chr6:36710075G>C   | Silent            | CPNE5     | p.P584P  | copine V 25 (0.00)                        | 57 (0.96)  | 2.57 |
| 12-01 | Gp4 | g.chr6:36710218G>T   | Missense Mutation | CPNE5     | p.L537M  | copine V 34 (0.00)                        | 139 (0.60) | 1.59 |
| 12-01 | Gp4 | g.chr16:12798877C>A  | Missense Mutation | CPPED1    | p.D107Y  | calcineurin-like phosphatase 172 (0.01)   | 197 (0.21) | 0.55 |
| 12-01 | Gp4 | g.chr1:1248467C>A    | Missense Mutation | CPSF3L    | p.G360V  | cleavage and polyadenylation 29 (0.00)    | 88 (0.33)  | 0.88 |
| 12-01 | Gp4 | g.chr22:51010451C>T  | Nonsense Mutation | CPT1B     | p.W520*  | carnitine palmitoyltransferase 95 (0.01)  | 157 (0.19) | 0.51 |
| 12-01 | Gp4 | g.chr20:2777258G>T   | Silent            | CPXM1     | p.T320T  | carboxypeptidase X (M1) 75 (0.00)         | 67 (0.70)  | 0.57 |
| 12-01 | Gp4 | g.chr10:125528110C>A | Missense Mutation | CPXM2     | p.V411L  | carboxypeptidase X (M1) 89 (0.00)         | 43 (0.33)  | 0.87 |
| 12-01 | Gp4 | g.chr10:125528127G>A | Missense Mutation | CPXM2     | p.A405V  | carboxypeptidase X (M1) 85 (0.00)         | 40 (0.47)  | 1.27 |
| 12-01 | Gp4 | g.chr16:1706100C>A   | Missense Mutation | CRAMP1L   | p.L448M  | Crmp, cramped-like (Drosophila) 20 (0.00) | 19 (0.26)  | 0.70 |
| 12-01 | Gp4 | g.chr9:131864256C>G  | Missense Mutation | CRAT      | p.W237C  | carnitine O-acetyltransferase 151 (0.00)  | 85 (0.25)  | 0.66 |
| 12-01 | Gp4 | g.chr16:3789659C>T   | Silent            | CREBBP    | p.E1400E | CREB binding protein 46 (0.00)            | 12 (0.92)  | 2.44 |
| 12-01 | Gp4 | g.chr19:18707748G>T  | Missense Mutation | CRLF1     | p.A270D  | cytokine receptor-like factor 31 (0.00)   | 45 (0.71)  | 1.90 |
| 12-01 | Gp4 | g.chr19:18709362G>T  | Missense Mutation | CRLF1     | p.H193N  | cytokine receptor-like factor 35 (0.00)   | 281 (0.15) | 0.39 |
| 12-01 | Gp4 | g.chr1:16950915C>A   | lincRNA           | CROCCP2   |          | ciliary rootlet coiled-coil 16 (0.00)     | 42 (0.29)  | 0.76 |



|       |     |                      |                   |               |          |                            |            |            |      |
|-------|-----|----------------------|-------------------|---------------|----------|----------------------------|------------|------------|------|
| 12-01 | Gp4 | g.chr1:16812197C>A   | RNA               | CROCCP3       |          | ciliary rootlet coiled-coi | 72 (0.00)  | 66 (0.29)  | 0.77 |
| 12-01 | Gp4 | g.chr2:209010500G>T  | Missense Mutation | CRYGB         | p.P84T   | crystallin, gamma B        | 52 (0.00)  | 110 (0.47) | 1.26 |
| 12-01 | Gp4 | g.chr2:209010502G>T  | Missense Mutation | CRYGB         | p.P83H   | crystallin, gamma B        | 52 (0.00)  | 110 (0.48) | 1.28 |
| 12-01 | Gp4 | g.chr1:110466466T>C  | Missense Mutation | CSF1          | p.L408P  | colony stimulating facto   | 146 (0.00) | 54 (0.81)  | 2.17 |
| 12-01 | Gp4 | g.chr5:149457674C>G  | Splice Site       | CSF1R         |          | colony stimulating facto   | 80 (0.00)  | 33 (0.39)  | 1.05 |
| 12-01 | Gp4 | g.chr8:19266192T>C   | Missense Mutation | CSGALNACT     | p.E414G  | chondroitin sulfate N-ac   | 54 (0.00)  | 14 (0.43)  | 1.14 |
| 12-01 | Gp4 | g.chr17:61988255C>G  | Missense Mutation | CSHL1         | p.A14P   | chorionic somatomamm       | 64 (0.00)  | 63 (0.84)  | 2.24 |
| 12-01 | Gp4 | g.chr22:38710090G>T  | Missense Mutation | CSNK1E        | p.L25M   | casein kinase 1, epsilon   | 95 (0.00)  | 106 (0.58) | 1.56 |
| 12-01 | Gp4 | g.chr15:75977140G>T  | Missense Mutation | CSPG4         | p.F1462L | chondroitin sulfate prote  | 48 (0.00)  | 62 (0.66)  | 1.76 |
| 12-01 | Gp4 | g.chr15:75980925C>T  | Silent            | CSPG4         | p.Q827Q  | chondroitin sulfate prote  | 88 (0.00)  | 20 (0.95)  | 2.53 |
| 12-01 | Gp4 | g.chr15:85741271G>A  | RNA               | CSPG4P12      |          | chondroitin sulfate prote  | 16 (0.00)  | 21 (0.71)  | 1.90 |
| 12-01 | Gp4 | g.chr15:85747574C>G  | RNA               | CSPG4P12      |          | chondroitin sulfate prote  | 25 (0.00)  | 22 (0.23)  | 0.61 |
| 12-01 | Gp4 | g.chr11:65780420G>C  | Missense Mutation | CST6          | p.E122Q  | cystatin E/M               | 25 (0.00)  | 54 (0.33)  | 0.89 |
| 12-01 | Gp4 | g.chr4:1244716G>T    | RNA               | CTBP1-AS2     |          | CTBP1 antisense RNA        | 58 (0.00)  | 35 (0.14)  | 0.38 |
| 12-01 | Gp4 | g.chr19:20370002A>T  | RNA               | CTC-260E6.6   |          |                            | 135 (0.00) | 261 (0.40) | 1.06 |
| 12-01 | Gp4 | g.chr19:20370033A>T  | RNA               | CTC-260E6.6   |          |                            | 112 (0.00) | 118 (0.35) | 0.93 |
| 12-01 | Gp4 | g.chr5:68247610G>T   | lincRNA           | CTC-340D7.1   |          |                            | 32 (0.00)  | 34 (0.15)  | 0.39 |
| 12-01 | Gp4 | g.chr19:22790752C>A  | RNA               | CTC-457E21.6  |          |                            | 61 (0.00)  | 105 (0.36) | 0.97 |
| 12-01 | Gp4 | g.chr17:8135724C>A   | Missense Mutation | CTC1          | p.W672L  | CTS telomere maintena      | 88 (0.00)  | 164 (0.34) | 0.91 |
| 12-01 | Gp4 | g.chr5:99799661C>T   | lincRNA           | CTD-2001C12.1 |          |                            | 40 (0.00)  | 16 (0.88)  | 2.33 |
| 12-01 | Gp4 | g.chr5:38174988G>T   | lincRNA           | CTD-2116N24.1 |          |                            | 41 (0.00)  | 84 (0.18)  | 0.48 |
| 12-01 | Gp4 | g.chr14:65746158C>T  | lincRNA           | CTD-2509G16.5 |          |                            | 33 (0.00)  | 16 (0.88)  | 2.33 |
| 12-01 | Gp4 | g.chr8:17947160G>T   | RNA               | CTD-2547L16.1 |          |                            | 66 (0.00)  | 12 (0.58)  | 1.56 |
| 12-01 | Gp4 | g.chr19:48267963C>A  | RNA               | CTD-2571L23.6 |          |                            | 15 (0.00)  | 43 (0.67)  | 1.80 |
| 12-01 | Gp4 | g.chr11:66276650C>G  | Missense Mutation | CTD-3074O7.1  | p.S8C    |                            | 116 (0.00) | 104 (0.17) | 0.46 |
| 12-01 | Gp4 | g.chr19:51658645C>T  | RNA               | CTD-3187F8.14 |          |                            | 102 (0.00) | 39 (0.85)  | 2.26 |
| 12-01 | Gp4 | g.chr18:46163003G>T  | Nonsense Mutation | CTIF          | p.E67*   | CBP80/20-dependent tr      | 43 (0.00)  | 50 (0.16)  | 0.43 |
| 12-01 | Gp4 | g.chr18:46287962C>A  | Missense Mutation | CTIF          | p.R425S  | CBP80/20-dependent tr      | 37 (0.00)  | 41 (0.73)  | 1.95 |
| 12-01 | Gp4 | g.chr7:117432137G>A  | Silent            | CTTNBP2       | p.P371P  | cortactin binding proteir  | 136 (0.01) | 47 (0.83)  | 2.21 |
| 12-01 | Gp4 | g.chr17:55962703C>A  | Missense Mutation | CUEDC1        | p.G75C   | CUE domain containing      | 82 (0.01)  | 138 (0.36) | 0.97 |
| 12-01 | Gp4 | g.chr10:104184476C>A | Nonsense Mutation | CUEDC2        | p.E50*   | CUE domain containing      | 90 (0.00)  | 74 (0.18)  | 0.47 |
| 12-01 | Gp4 | g.chr10:104184891G>A | Missense Mutation | CUEDC2        | p.L19F   | CUE domain containing      | 32 (0.00)  | 71 (0.34)  | 0.90 |
| 12-01 | Gp4 | g.chr7:148487438G>A  | Missense Mutation | CUL1          | p.A571T  | cullin 1                   | 130 (0.01) | 129 (0.98) | 2.63 |
| 12-01 | Gp4 | g.chr12:111779748C>T | Missense Mutation | CUX2          | p.R1184W | cut-like homeobox 2        | 21 (0.00)  | 82 (0.17)  | 0.46 |
| 12-01 | Gp4 | g.chr17:36963078G>C  | Missense Mutation | CWC25         | p.S281C  | CWC25 spliceosome-as       | 101 (0.00) | 25 (0.44)  | 1.17 |

|       |     |                     |                   |         |         |                                   |            |      |
|-------|-----|---------------------|-------------------|---------|---------|-----------------------------------|------------|------|
| 12-01 | Gp4 | g.chr15:22928456C>T | Silent            | CYFIP1  | p.T111T | cytoplasmic FMR1 inter354 (0.00)  | 261 (0.33) | 1.03 |
| 12-01 | Gp4 | g.chr5:156738692G>C | Missense Mutation | CYFIP2  | p.S312T | cytoplasmic FMR1 inter121 (0.00)  | 10 (0.70)  | 1.87 |
| 12-01 | Gp4 | g.chr15:74631065G>T | Silent            | CYP11A1 | p.T269T | cytochrome P450, famil56 (0.00)   | 14 (0.71)  | 1.90 |
| 12-01 | Gp4 | g.chr10:94834153G>T | Missense Mutation | CYP26A1 | p.G93V  | cytochrome P450, famil50 (0.00)   | 41 (0.41)  | 1.11 |
| 12-01 | Gp4 | g.chr19:41405884C>A | RNA               | CYP2G1P |         | cytochrome P450, famil98 (0.00)   | 230 (0.16) | 0.42 |
| 12-01 | Gp4 | g.chr1:47610079G>A  | Missense Mutation | CYP4A22 | p.E281K | cytochrome P450, famil289 (0.00)  | 25 (0.84)  | 2.24 |
| 12-01 | Gp4 | g.chr1:47283664C>G  | Missense Mutation | CYP4B1  | p.A397G | cytochrome P450, famil158 (0.01)  | 67 (0.97)  | 2.59 |
| 12-01 | Gp4 | g.chr19:15760993G>T | Splice Site       | CYP4F3  | p.K306N | cytochrome P450, famil59 (0.00)   | 43 (0.63)  | 1.67 |
| 12-01 | Gp4 | g.chr3:42916694C>A  | Missense Mutation | CYP8B1  | p.E205D | cytochrome P450, famil97 (0.00)   | 22 (0.55)  | 1.45 |
| 12-01 | Gp4 | g.chr9:124331135G>C | Intron            | DAB2IP  |         | DAB2 interacting protei67 (0.00)  | 85 (0.14)  | 0.38 |
| 12-01 | Gp4 | g.chr9:124332874C>G | Intron            | DAB2IP  |         | DAB2 interacting protei106 (0.00) | 105 (0.21) | 0.56 |
| 12-01 | Gp4 | g.chr9:124333628G>A | Intron            | DAB2IP  |         | DAB2 interacting protei168 (0.00) | 25 (0.88)  | 2.35 |
| 12-01 | Gp4 | g.chr9:124334762T>C | Intron            | DAB2IP  |         | DAB2 interacting protei89 (0.00)  | 17 (0.53)  | 1.41 |
| 12-01 | Gp4 | g.chr9:124383034C>A | Intron            | DAB2IP  |         | DAB2 interacting protei210 (0.00) | 234 (0.15) | 0.41 |
| 12-01 | Gp4 | g.chr9:124391153A>G | Intron            | DAB2IP  |         | DAB2 interacting protei48 (0.00)  | 32 (0.62)  | 1.67 |
| 12-01 | Gp4 | g.chr9:124391753G>T | Intron            | DAB2IP  |         | DAB2 interacting protei191 (0.00) | 87 (0.98)  | 2.61 |
| 12-01 | Gp4 | g.chr9:124393609C>T | Intron            | DAB2IP  |         | DAB2 interacting protei190 (0.00) | 212 (0.34) | 0.91 |
| 12-01 | Gp4 | g.chr9:124394259C>A | Intron            | DAB2IP  |         | DAB2 interacting protei209 (0.00) | 151 (0.16) | 0.42 |
| 12-01 | Gp4 | g.chr9:124399202G>T | Intron            | DAB2IP  |         | DAB2 interacting protei223 (0.00) | 97 (0.15)  | 0.41 |
| 12-01 | Gp4 | g.chr9:124401383C>A | Intron            | DAB2IP  |         | DAB2 interacting protei110 (0.00) | 49 (0.41)  | 1.09 |
| 12-01 | Gp4 | g.chr9:124401482G>T | Intron            | DAB2IP  |         | DAB2 interacting protei136 (0.00) | 68 (0.18)  | 0.47 |
| 12-01 | Gp4 | g.chr9:124402833C>A | Intron            | DAB2IP  |         | DAB2 interacting protei104 (0.00) | 47 (0.64)  | 1.70 |
| 12-01 | Gp4 | g.chr9:124417663C>A | Intron            | DAB2IP  |         | DAB2 interacting protei103 (0.01) | 346 (0.66) | 1.75 |
| 12-01 | Gp4 | g.chr9:124418819C>T | Intron            | DAB2IP  |         | DAB2 interacting protei298 (0.00) | 506 (0.17) | 0.44 |
| 12-01 | Gp4 | g.chr9:124441591A>T | Intron            | DAB2IP  |         | DAB2 interacting protei334 (0.00) | 248 (0.37) | 0.98 |
| 12-01 | Gp4 | g.chr9:124442448G>C | Intron            | DAB2IP  |         | DAB2 interacting protei142 (0.00) | 88 (0.27)  | 0.73 |
| 12-01 | Gp4 | g.chr9:124445300C>A | Intron            | DAB2IP  |         | DAB2 interacting protei75 (0.00)  | 93 (0.40)  | 1.06 |
| 12-01 | Gp4 | g.chr9:124446637C>A | Intron            | DAB2IP  |         | DAB2 interacting protei222 (0.00) | 32 (0.72)  | 1.92 |
| 12-01 | Gp4 | g.chr9:124449739C>A | Intron            | DAB2IP  |         | DAB2 interacting protei177 (0.00) | 102 (0.36) | 0.97 |
| 12-01 | Gp4 | g.chr9:124451741C>A | Intron            | DAB2IP  |         | DAB2 interacting protei106 (0.00) | 91 (0.70)  | 1.88 |
| 12-01 | Gp4 | g.chr9:124463956G>T | Intron            | DAB2IP  |         | DAB2 interacting protei113 (0.00) | 45 (0.33)  | 0.89 |
| 12-01 | Gp4 | g.chr9:124469901G>T | Intron            | DAB2IP  |         | DAB2 interacting protei111 (0.01) | 144 (0.72) | 1.93 |
| 12-01 | Gp4 | g.chr9:124474241G>A | Intron            | DAB2IP  |         | DAB2 interacting protei49 (0.00)  | 49 (0.41)  | 1.09 |
| 12-01 | Gp4 | g.chr9:124478021C>A | Intron            | DAB2IP  |         | DAB2 interacting protei155 (0.00) | 20 (0.75)  | 2.00 |
| 12-01 | Gp4 | g.chr9:124496863C>A | Intron            | DAB2IP  |         | DAB2 interacting protei38 (0.03)  | 101 (0.81) | 2.17 |

|       |     |                      |                   |          |          |                          |            |            |      |
|-------|-----|----------------------|-------------------|----------|----------|--------------------------|------------|------------|------|
| 12-01 | Gp4 | g.chr9:124498434C>A  | Intron            | DAB2IP   |          | DAB2 interacting protei  | 45 (0.00)  | 135 (0.97) | 2.59 |
| 12-01 | Gp4 | g.chr9:124509435G>T  | Intron            | DAB2IP   |          | DAB2 interacting protei  | 147 (0.00) | 344 (0.37) | 0.99 |
| 12-01 | Gp4 | g.chr9:124521622C>G  | Intron            | DAB2IP   |          | DAB2 interacting protei  | 99 (0.00)  | 60 (0.57)  | 1.51 |
| 12-01 | Gp4 | g.chr9:124523357C>A  | Intron            | DAB2IP   |          | DAB2 interacting protei  | 117 (0.00) | 129 (0.16) | 0.43 |
| 12-01 | Gp4 | g.chr9:124524103C>G  | Intron            | DAB2IP   |          | DAB2 interacting protei  | 155 (0.00) | 90 (0.36)  | 0.95 |
| 12-01 | Gp4 | g.chr9:124527243G>A  | Intron            | DAB2IP   |          | DAB2 interacting protei  | 123 (0.00) | 34 (0.32)  | 0.86 |
| 12-01 | Gp4 | g.chr9:124543159G>A  | Intron            | DAB2IP   |          | DAB2 interacting protei  | 91 (0.00)  | 72 (0.33)  | 0.89 |
| 12-01 | Gp4 | g.chrX:85969563C>T   | Missense Mutation | DACH2    | p.P315L  | dachshund family transc  | 90 (0.00)  | 12 (0.83)  | 1.39 |
| 12-01 | Gp4 | g.chr3:49053390G>A   | Missense Mutation | DALRD3   | p.P320S  | DALR anticodon bindin    | 151 (0.00) | 39 (0.18)  | 0.48 |
| 12-01 | Gp4 | g.chr19:3963887C>A   | Missense Mutation | DAPK3    | p.G195V  | death-associated protein | 24 (0.00)  | 32 (0.19)  | 0.50 |
| 12-01 | Gp4 | g.chr1:173808538G>T  | Missense Mutation | DARS2    | p.G292W  | aspartyl-tRNA syntheta   | 94 (0.00)  | 21 (0.62)  | 1.65 |
| 12-01 | Gp4 | g.chr19:1421256T>C   | Splice Site       | DAZAP1   | p.V138A  | DAZ associated protein   | 34 (0.00)  | 83 (0.34)  | 0.90 |
| 12-01 | Gp4 | g.chr7:44099706C>A   | Silent            | DBNL     | p.L345L  | drebrin-like             | 36 (0.00)  | 26 (0.50)  | 1.33 |
| 12-01 | Gp4 | g.chr11:20180804G>C  | Silent            | DBX1     | p.P134P  | developing brain homeo   | 40 (0.00)  | 176 (0.80) | 2.12 |
| 12-01 | Gp4 | g.chrX:125685397T>C  | Missense Mutation | DCAF12L1 | p.R399G  | DDB1 and CUL4 associ     | 68 (0.00)  | 23 (0.61)  | 1.01 |
| 12-01 | Gp4 | g.chr19:14070099C>T  | Missense Mutation | DCAF15   | p.R343W  | DDB1 and CUL4 associ     | 65 (0.00)  | 59 (0.15)  | 0.41 |
| 12-01 | Gp4 | g.chr17:61628058G>T  | Missense Mutation | DCAF7    | p.R7L    | DDB1 and CUL4 associ     | 48 (0.00)  | 113 (0.21) | 0.57 |
| 12-01 | Gp4 | g.chr17:61628117C>T  | Missense Mutation | DCAF7    | p.R27W   | DDB1 and CUL4 associ     | 55 (0.00)  | 148 (0.20) | 0.52 |
| 12-01 | Gp4 | g.chr1:160188708G>T  | Silent            | DCAF8    | p.G651G  | DDB1 and CUL4 associ     | 48 (0.02)  | 126 (0.36) | 0.95 |
| 12-01 | Gp4 | g.chr1:160209565C>A  | Silent            | DCAF8    | p.L369L  | DDB1 and CUL4 associ     | 122 (0.00) | 54 (0.96)  | 2.57 |
| 12-01 | Gp4 | g.chr1:32681460G>T   | Missense Mutation | DCDC2B   | p.A338S  | doublecortin domain coi  | 27 (0.00)  | 53 (0.32)  | 0.86 |
| 12-01 | Gp4 | g.chr11:6645376C>A   | Nonsense Mutation | DCHS1    | p.G2511* | dachsous cadherin-relat  | 93 (0.00)  | 152 (0.29) | 0.77 |
| 12-01 | Gp4 | g.chr11:6661560G>T   | Silent            | DCHS1    | p.R429R  | dachsous cadherin-relat  | 50 (0.00)  | 82 (0.72)  | 1.92 |
| 12-01 | Gp4 | g.chr5:112337305C>A  | Nonsense Mutation | DCP2     | p.S247*  | decapping mRNA 2         | 15 (0.00)  | 66 (0.47)  | 1.25 |
| 12-01 | Gp4 | g.chr2:74607148C>A   | Missense Mutation | DCTN1    | p.R6M    | dynactin 1               | 37 (0.00)  | 27 (0.30)  | 0.79 |
| 12-01 | Gp4 | g.chr11:61097485T>G  | Missense Mutation | DDB1     | p.Y91S   | damage-specific DNA b    | 102 (0.00) | 39 (0.62)  | 1.64 |
| 12-01 | Gp4 | g.chr17:76887376C>A  | Missense Mutation | DDC8     | p.G404W  |                          | 60 (0.00)  | 33 (0.15)  | 0.40 |
| 12-01 | Gp4 | g.chr1:15957000C>A   | Missense Mutation | DDI2     | p.S150Y  | DNA-damage inducible     | 74 (0.00)  | 40 (0.35)  | 0.93 |
| 12-01 | Gp4 | g.chr1:15957036C>A   | Missense Mutation | DDI2     | p.A162D  | DNA-damage inducible     | 66 (0.00)  | 27 (0.89)  | 2.37 |
| 12-01 | Gp4 | g.chr10:70723164T>A  | Missense Mutation | DDX21    | p.I242N  | DEAD (Asp-Glu-Ala-A      | 57 (0.00)  | 14 (0.86)  | 2.29 |
| 12-01 | Gp4 | g.chr12:49228187C>T  | Silent            | DDX23    | p.G492G  | DEAD (Asp-Glu-Ala-A      | 65 (0.00)  | 35 (0.51)  | 1.37 |
| 12-01 | Gp4 | g.chr17:61864461G>T  | Missense Mutation | DDX42    | p.G18C   | DEAD (Asp-Glu-Ala-A      | 134 (0.01) | 41 (0.15)  | 0.39 |
| 12-01 | Gp4 | g.chr19:19033189G>T  | Missense Mutation | DDX49    | p.D168Y  | DEAD (Asp-Glu-Ala-A      | 23 (0.00)  | 17 (0.65)  | 1.73 |
| 12-01 | Gp4 | g.chr12:132624673G>T | Missense Mutation | DDX51    | p.A582D  | DEAD (Asp-Glu-Ala-A      | 32 (0.00)  | 69 (0.20)  | 0.54 |
| 12-01 | Gp4 | g.chr9:32526140G>T   | Missense Mutation | DDX58    | p.L9M    | DEAD (Asp-Glu-Ala-A      | 55 (0.00)  | 137 (0.29) | 0.78 |

|       |     |                      |                   |         |          |                                     |            |      |
|-------|-----|----------------------|-------------------|---------|----------|-------------------------------------|------------|------|
| 12-01 | Gp4 | g.chr4:169340505G>A  | Missense Mutation | DDX60L  | p.A853V  | DEAD (Asp-Glu-Ala-A 26 (0.00)       | 18 (0.89)  | 2.37 |
| 12-01 | Gp4 | g.chr15:65960405C>G  | Missense Mutation | DENND4A | p.R1571T | DENN/MADD domain 188 (0.00)         | 33 (0.79)  | 2.10 |
| 12-01 | Gp4 | g.chr22:50756412G>T  | Silent            | DENND6B | p.R99R   | DENN/MADD domain 32 (0.00)          | 39 (0.46)  | 1.23 |
| 12-01 | Gp4 | g.chr15:89070907A>T  | Silent            | DET1    | p.R398R  | de-etiolated homolog 1 42 (0.02)    | 183 (0.36) | 0.95 |
| 12-01 | Gp4 | g.chr9:117266780G>A  | Missense Mutation | DFNB31  | p.S101F  | deafness, autosomal rec 21 (0.00)   | 46 (0.28)  | 0.75 |
| 12-01 | Gp4 | g.chr22:19127227G>T  | Missense Mutation | DGCR14  | p.L196I  | DiGeorge syndrome crit 85 (0.00)    | 136 (0.41) | 1.10 |
| 12-01 | Gp4 | g.chr22:20074004G>A  | Missense Mutation | DGCR8   | p.G173D  | DGCR8 microprocessor 240 (0.00)     | 263 (0.17) | 0.47 |
| 12-01 | Gp4 | g.chr2:234371289G>T  | Splice Site       | DGKD    | p.G1032W | diacylglycerol kinase, d 208 (0.00) | 70 (0.23)  | 0.61 |
| 12-01 | Gp4 | g.chr11:46398625G>T  | Missense Mutation | DGKZ    | p.E923D  | diacylglycerol kinase, z 52 (0.00)  | 25 (0.28)  | 0.75 |
| 12-01 | Gp4 | g.chr11:71149955G>C  | Silent            | DHCR7   | p.T267T  | 7-dehydrocholesterol re 35 (0.00)   | 41 (0.24)  | 0.65 |
| 12-01 | Gp4 | g.chr12:49488123C>A  | Missense Mutation | DHH     | p.G58V   | desert hedgehog 74 (0.00)           | 59 (0.34)  | 0.90 |
| 12-01 | Gp4 | g.chr19:47858373G>C  | Silent            | DHX34   | p.L261L  | DEAH (Asp-Glu-Ala-H 111 (0.00)      | 59 (0.63)  | 1.67 |
| 12-01 | Gp4 | g.chr12:125451714G>T | Missense Mutation | DHX37   | p.R274S  | DEAH (Asp-Glu-Ala-H 87 (0.00)       | 72 (0.81)  | 2.15 |
| 12-01 | Gp4 | g.chr14:95560281C>A  | Missense Mutation | DICER1  | p.D1770Y | dicer 1, ribonuclease ty 57 (0.00)  | 80 (0.69)  | 1.83 |
| 12-01 | Gp4 | g.chr1:210010208C>A  | Silent            | DIEXF   | p.P238P  | digestive organ expansi 59 (0.00)   | 54 (0.59)  | 1.58 |
| 12-01 | Gp4 | g.chr12:51127926A>G  | Silent            | DIP2B   | p.S1330S | DIP2 disco-interacting p 47 (0.00)  | 199 (0.42) | 1.11 |
| 12-01 | Gp4 | g.chr1:68512639C>T   | Silent            | DIRAS3  | p.L114L  | DIRAS family, GTP-bir 265 (0.00)    | 340 (0.35) | 0.93 |
| 12-01 | Gp4 | g.chr1:231829605T>C  | Missense Mutation | DISC1   | p.F34S   | disrupted in schizophre 151 (0.00)  | 16 (0.38)  | 1.00 |
| 12-01 | Gp4 | g.chr11:111844816G>T | Missense Mutation | DIXDC1  | p.G128V  | DIX domain containing 79 (0.00)     | 260 (0.72) | 1.93 |
| 12-01 | Gp4 | g.chr10:54075346G>A  | Intron            | DKK1    |          | dickkopf WNT signaling 397 (0.00)   | 86 (0.30)  | 0.81 |
| 12-01 | Gp4 | g.chr8:42231674T>A   | Missense Mutation | DKK4    | p.T207S  | dickkopf WNT signaling 47 (0.00)    | 125 (0.34) | 0.92 |
| 12-01 | Gp4 | g.chr3:38163602C>A   | Silent            | DLEC1   | p.V1687V | deleted in lung and esop 136 (0.00) | 223 (0.16) | 0.42 |
| 12-01 | Gp4 | g.chr8:1581043C>A    | Silent            | DLGAP2  | p.V467V  | discs, large (Drosophila 30 (0.00)  | 47 (0.17)  | 0.56 |
| 12-01 | Gp4 | g.chr8:1581180C>A    | Missense Mutation | DLGAP2  | p.S513Y  | discs, large (Drosophila 133 (0.00) | 98 (0.18)  | 0.60 |
| 12-01 | Gp4 | g.chr6:170592127C>A  | Missense Mutation | DLL1    | p.Q705H  | delta-like 1 (Drosophila 80 (0.00)  | 24 (0.21)  | 0.56 |
| 12-01 | Gp4 | g.chr6:170595358C>G  | Missense Mutation | DLL1    | p.Q233H  | delta-like 1 (Drosophila 237 (0.00) | 276 (0.25) | 0.67 |
| 12-01 | Gp4 | g.chr7:96651665C>A   | Missense Mutation | DLX5    | p.E124D  | distal-less homeobox 5 52 (0.00)    | 45 (0.60)  | 1.60 |
| 12-01 | Gp4 | g.chr7:96639306C>T   | Missense Mutation | DLX6    | p.H277Y  | distal-less homeobox 6 87 (0.00)    | 17 (0.35)  | 0.94 |
| 12-01 | Gp4 | g.chr10:124390489G>A | Missense Mutation | DMBT1   | p.R1884K | deleted in malignant bra 198 (0.00) | 102 (0.27) | 0.73 |
| 12-01 | Gp4 | g.chr10:124399854A>G | Missense Mutation | DMBT1   | p.Q2285R | deleted in malignant bra 288 (0.00) | 53 (0.45)  | 1.21 |
| 12-01 | Gp4 | g.chr19:42351930C>A  | Silent            | DMRTC2  | p.T117T  | DMRT-like family C2 28 (0.00)       | 65 (0.15)  | 0.41 |
| 12-01 | Gp4 | g.chr3:52403955G>T   | Nonsense Mutation | DNAH1   | p.E2020* | dynein, axonemal, heav 210 (0.00)   | 289 (0.49) | 1.31 |
| 12-01 | Gp4 | g.chr12:124272404G>T | Missense Mutation | DNAH10  | p.R431M  | dynein, axonemal, heav 74 (0.00)    | 60 (0.18)  | 0.49 |
| 12-01 | Gp4 | g.chr7:21678616C>A   | Missense Mutation | DNAH11  | p.P1626H | dynein, axonemal, heav 50 (0.02)    | 259 (0.64) | 1.70 |
| 12-01 | Gp4 | g.chr17:76455273G>A  | Missense Mutation | DNAH17  | p.P3219L | dynein, axonemal, heav 131 (0.00)   | 74 (0.32)  | 0.86 |

|       |     |                      |                   |          |          |                           |            |            |      |
|-------|-----|----------------------|-------------------|----------|----------|---------------------------|------------|------------|------|
| 12-01 | Gp4 | g.chr17:76481803G>A  | Missense Mutation | DNAH17   | p.R2433C | dynein, axonemal, heav    | 104 (0.00) | 141 (0.18) | 0.49 |
| 12-01 | Gp4 | g.chr17:76490741C>A  | Missense Mutation | DNAH17   | p.M2063I | dynein, axonemal, heav    | 97 (0.00)  | 30 (0.90)  | 2.40 |
| 12-01 | Gp4 | g.chr17:76547654G>T  | Missense Mutation | DNAH17   | p.A785E  | dynein, axonemal, heav    | 176 (0.00) | 152 (0.43) | 1.16 |
| 12-01 | Gp4 | g.chr17:76557910G>A  | Silent            | DNAH17   | p.N574N  | dynein, axonemal, heav    | 148 (0.00) | 49 (0.82)  | 2.18 |
| 12-01 | Gp4 | g.chr17:11671874G>T  | Missense Mutation | DNAH9    | p.E2425D | dynein, axonemal, heav    | 86 (0.00)  | 32 (0.16)  | 0.42 |
| 12-01 | Gp4 | g.chr19:14627332G>A  | Silent            | DNAJB1   | p.I246I  | DnaJ (Hsp40) homolog,     | 98 (0.00)  | 13 (0.54)  | 1.44 |
| 12-01 | Gp4 | g.chr12:49742670C>G  | Silent            | DNAJC22  | p.L5L    | DnaJ (Hsp40) homolog,     | 111 (0.00) | 16 (0.56)  | 1.50 |
| 12-01 | Gp4 | g.chr12:49743023C>A  | Missense Mutation | DNAJC22  | p.A123D  | DnaJ (Hsp40) homolog,     | 141 (0.00) | 157 (0.31) | 0.83 |
| 12-01 | Gp4 | g.chr11:6588321T>C   | Missense Mutation | DNHD1    | p.V3861A | dynein heavy chain dom    | 298 (0.00) | 133 (0.16) | 0.42 |
| 12-01 | Gp4 | g.chr11:6593059T>C   | Missense Mutation | DNHD1    | p.L4702P | dynein heavy chain dom    | 123 (0.00) | 66 (0.24)  | 0.65 |
| 12-01 | Gp4 | g.chr11:6593193G>T   | Missense Mutation | DNHD1    | p.V4747L | dynein heavy chain dom    | 531 (0.00) | 210 (0.34) | 0.90 |
| 12-01 | Gp4 | g.chr9:130985072A>T  | Splice Site       | DNM1     | p.M377L  | dynamin 1                 | 21 (0.00)  | 51 (0.31)  | 0.84 |
| 12-01 | Gp4 | g.chr12:32895669C>T  | Missense Mutation | DNM1L    | p.A677V  | dynamin 1-like            | 75 (0.00)  | 220 (0.19) | 0.51 |
| 12-01 | Gp4 | g.chr15:100340393T>G | RNA               | DNM1P46  |          | DNM1 pseudogene 46        | 47 (0.02)  | 16 (0.38)  | 1.00 |
| 12-01 | Gp4 | g.chr15:100340405C>G | RNA               | DNM1P46  |          | DNM1 pseudogene 46        | 49 (0.02)  | 17 (0.29)  | 0.78 |
| 12-01 | Gp4 | g.chr15:84957391T>C  | RNA               | DNM1P51  |          | DNM1 pseudogene 51        | 82 (0.00)  | 22 (0.23)  | 0.61 |
| 12-01 | Gp4 | g.chr19:10940965G>T  | Silent            | DNM2     | p.V814V  | dynamin 2                 | 25 (0.00)  | 40 (0.42)  | 1.13 |
| 12-01 | Gp4 | g.chr19:10248595G>T  | Silent            | DNMT1    | p.I1386I | DNA (cytosine-5-)-met     | 36 (0.00)  | 62 (0.23)  | 0.60 |
| 12-01 | Gp4 | g.chr19:10257071T>G  | Silent            | DNMT1    | p.R934R  | DNA (cytosine-5-)-met     | 69 (0.01)  | 123 (0.26) | 0.69 |
| 12-01 | Gp4 | g.chr19:10291528C>T  | Missense Mutation | DNMT1    | p.E51K   | DNA (cytosine-5-)-met     | 52 (0.00)  | 51 (0.27)  | 0.73 |
| 12-01 | Gp4 | g.chr21:45666412C>G  | Missense Mutation | DNMT3L   | p.L344F  | DNA (cytosine-5-)-met     | 19 (0.00)  | 47 (0.66)  | 1.76 |
| 12-01 | Gp4 | g.chr7:111368610G>T  | Missense Mutation | DOCK4    | p.A1874D | dedicator of cytokinesi   | 212 (0.00) | 50 (0.38)  | 1.01 |
| 12-01 | Gp4 | g.chr19:11344034G>T  | Missense Mutation | DOCK6    | p.P855T  | dedicator of cytokinesi   | 54 (0.00)  | 43 (0.56)  | 1.49 |
| 12-01 | Gp4 | g.chr17:1936940A>T   | Missense Mutation | DPH1     | p.Q73L   | diphthamide biosynthesi   | 140 (0.00) | 75 (0.15)  | 0.39 |
| 12-01 | Gp4 | g.chr1:44436343T>C   | Missense Mutation | DPH2     | p.S75P   | DPH2 homolog (S. cere     | 177 (0.00) | 80 (0.20)  | 0.53 |
| 12-01 | Gp4 | g.chr15:36026969G>T  | lincRNA           | DPH6-AS1 |          | DPH6 antisense RNA 1      | 38 (0.03)  | 22 (0.41)  | 1.09 |
| 12-01 | Gp4 | g.chr9:140468736C>A  | Silent            | DPH7     | p.V188V  | diphthamide biosynthesi   | 301 (0.00) | 230 (0.16) | 0.43 |
| 12-01 | Gp4 | g.chr7:154461117A>G  | Missense Mutation | DPP6     | p.Q243R  | dipeptidyl-peptidase 6    | 123 (0.00) | 22 (0.82)  | 2.18 |
| 12-01 | Gp4 | g.chr12:64061882C>T  | Missense Mutation | DPY19L2  | p.E98K   | dpy-19-like 2 (C. eleg    | 79 (0.00)  | 100 (0.17) | 0.45 |
| 12-01 | Gp4 | g.chr10:134015485G>A | Silent            | DPYSL4   | p.A382A  | dihydropyrimidinase-lik   | 32 (0.00)  | 41 (0.41)  | 1.11 |
| 12-01 | Gp4 | g.chr4:9784709C>G    | Silent            | DRD5     | p.S352S  | dopamine receptor D5      | 118 (0.00) | 128 (0.57) | 1.52 |
| 12-01 | Gp4 | g.chr11:117387231G>C | Silent            | DSCAML1  | p.L638L  | Down syndrome cell ad     | 52 (0.00)  | 96 (0.27)  | 0.72 |
| 12-01 | Gp4 | g.chr21:38610870G>A  | Missense Mutation | DSCR3    | p.P81L   | Down syndrome critical    | 38 (0.00)  | 123 (0.48) | 1.28 |
| 12-01 | Gp4 | g.chr6:15533617T>A   | Missense Mutation | DTNBP1   | p.D174V  | dystrobrevin binding pr   | 191 (0.00) | 190 (0.73) | 1.95 |
| 12-01 | Gp4 | g.chr7:76132886C>A   | Missense Mutation | DTX2     | p.S511R  | deltex 2, E3 ubiquitin li | 89 (0.00)  | 63 (0.19)  | 0.51 |

|       |     |                      |                   |         |          |                                               |            |            |      |
|-------|-----|----------------------|-------------------|---------|----------|-----------------------------------------------|------------|------------|------|
| 12-01 | Gp4 | g.chr15:45436406G>A  | Silent            | DUOX1   | p.L703L  | dual oxidase 1                                | 130 (0.00) | 182 (0.19) | 0.50 |
| 12-01 | Gp4 | g.chr15:45454021G>A  | Silent            | DUOX1   | p.G1314G | dual oxidase 1                                | 62 (0.00)  | 188 (0.25) | 0.67 |
| 12-01 | Gp4 | g.chr15:45398386G>T  | Silent            | DUOX2   | p.L695L  | dual oxidase 2                                | 53 (0.00)  | 39 (0.49)  | 1.30 |
| 12-01 | Gp4 | g.chr10:76797597C>A  | Silent            | DUPD1   | p.L220L  | dual specificity phosphatase 27               | 0.00       | 33 (0.18)  | 0.48 |
| 12-01 | Gp4 | g.chr19:5786764C>T   | Silent            | DUS3L   | p.L494L  | dihydrouridine synthase 36                    | 0.00       | 103 (0.41) | 1.09 |
| 12-01 | Gp4 | g.chr17:7132758G>A   | Silent            | DVL2    | p.S252S  | dishevelled segment pol 118                   | 0.00       | 224 (0.36) | 0.95 |
| 12-01 | Gp4 | g.chr14:102467555T>C | Missense Mutation | DYNC1H1 | p.L1420P | dynein, cytoplasmic 1, h338                   | 0.00       | 125 (0.51) | 1.37 |
| 12-01 | Gp4 | g.chr14:102486280A>G | Silent            | DYNC1H1 | p.E2798E | dynein, cytoplasmic 1, h265                   | 0.00       | 257 (0.15) | 0.39 |
| 12-01 | Gp4 | g.chr14:102516850G>A | Missense Mutation | DYNC1H1 | p.D4631N | dynein, cytoplasmic 1, h148                   | 0.00       | 231 (0.20) | 0.54 |
| 12-01 | Gp4 | g.chr2:172549359G>A  | Missense Mutation | DYNC1I2 | p.E61K   | dynein, cytoplasmic 1, i20                    | 0.00       | 108 (0.54) | 1.43 |
| 12-01 | Gp4 | g.chr2:71791251C>A   | Missense Mutation | DYSF    | p.Q825K  | dysferlin                                     | 94 (0.00)  | 114 (0.27) | 0.73 |
| 12-01 | Gp4 | g.chr1:21584052C>A   | Missense Mutation | ECE1    | p.R265I  | endothelin converting enzyme 41               | 0.00       | 26 (0.19)  | 0.51 |
| 12-01 | Gp4 | g.chr16:67917488C>A  | Missense Mutation | EDC4    | p.D1289E | enhancer of mRNA decapping 282                | 0.00       | 217 (0.26) | 0.70 |
| 12-01 | Gp4 | g.chr16:67917594C>A  | Missense Mutation | EDC4    | p.L1325M | enhancer of mRNA decapping 217                | 0.00       | 144 (0.82) | 2.19 |
| 12-01 | Gp4 | g.chr9:139758280G>A  | Missense Mutation | EDF1    | p.S41F   | endothelial differentiation factor 111        | 0.00       | 56 (0.62)  | 1.67 |
| 12-01 | Gp4 | g.chr5:137803020C>A  | Silent            | EGR1    | p.A294A  | early growth response 1 277                   | 0.00       | 209 (0.34) | 0.92 |
| 12-01 | Gp4 | g.chr10:64573250T>A  | Missense Mutation | EGR2    | p.D383V  | early growth response 2 232                   | 0.00       | 304 (0.34) | 0.89 |
| 12-01 | Gp4 | g.chr9:140669589A>G  | Missense Mutation | EHMT1   | p.K559R  | euchromatic histone-lysine 36                 | 0.00       | 63 (0.56)  | 1.48 |
| 12-01 | Gp4 | g.chr2:27592369C>T   | Silent            | EIF2B4  | p.K41K   | eukaryotic translation initiation factor 2B4  | 0.00       | 182 (0.15) | 0.41 |
| 12-01 | Gp4 | g.chr10:120803576G>A | Missense Mutation | EIF3A   | p.P913S  | eukaryotic translation initiation factor 3A   | 0.00       | 65 (0.68)  | 1.81 |
| 12-01 | Gp4 | g.chr7:2414236G>A    | Silent            | EIF3B   | p.L628L  | eukaryotic translation initiation factor 3B   | 0.00       | 103 (0.23) | 0.62 |
| 12-01 | Gp4 | g.chr19:39127547C>A  | Missense Mutation | EIF3K   | p.A128D  | eukaryotic translation initiation factor 3K   | 0.00       | 60 (0.20)  | 0.53 |
| 12-01 | Gp4 | g.chr5:176072377G>T  | Splice Site       | EIF4E1B |          | eukaryotic translation initiation factor 4E1B | 0.00       | 11 (0.82)  | 2.18 |
| 12-01 | Gp4 | g.chr3:184039377T>C  | Silent            | EIF4G1  | p.V248V  | eukaryotic translation initiation factor 4G1  | 0.00       | 81 (0.41)  | 1.09 |
| 12-01 | Gp4 | g.chr16:67236557G>T  | Missense Mutation | ELMO3   | p.A512S  | engulfment and cell motility factor 48        | 0.00       | 38 (0.16)  | 0.42 |
| 12-01 | Gp4 | g.chr7:73457333C>A   | Silent            | ELN     | p.V115V  | elastin                                       | 94 (0.00)  | 12 (0.83)  | 2.22 |
| 12-01 | Gp4 | g.chr7:73474349T>C   | Silent            | ELN     | p.A516A  | elastin                                       | 93 (0.00)  | 24 (0.71)  | 1.89 |
| 12-01 | Gp4 | g.chr4:110980852G>T  | Missense Mutation | ELOVL6  | p.L94M   | ELOVL fatty acid elongase 18                  | 0.00       | 10 (0.60)  | 1.60 |
| 12-01 | Gp4 | g.chr22:29611613G>A  | Missense Mutation | EMID1   | p.E105K  | EMI domain containing protein 68              | 0.00       | 123 (0.15) | 0.39 |
| 12-01 | Gp4 | g.chr22:29627061C>A  | Missense Mutation | EMID1   | p.P173H  | EMI domain containing protein 24              | 0.00       | 154 (0.25) | 0.68 |
| 12-01 | Gp4 | g.chr20:39990484C>A  | Silent            | EMILIN3 | p.G575G  | elastin microfibril interaction factor 3      | 0.00       | 62 (0.42)  | 1.12 |
| 12-01 | Gp4 | g.chr14:89087539C>A  | Missense Mutation | EML5    | p.G1707V | echinoderm microtubule-binding protein 345    | 0.00       | 31 (0.48)  | 1.29 |
| 12-01 | Gp4 | g.chr14:89181368G>T  | Missense Mutation | EML5    | p.F453L  | echinoderm microtubule-binding protein 39     | 0.00       | 15 (0.40)  | 1.07 |
| 12-01 | Gp4 | g.chr19:14884860G>T  | Missense Mutation | EMR2    | p.A30D   | egf-like module containing protein 33         | 0.00       | 78 (0.88)  | 2.36 |
| 12-01 | Gp4 | g.chr10:119305213C>A | Silent            | EMX2    | p.T159T  | empty spiracles homeobox protein 24           | 0.00       | 14 (0.57)  | 1.52 |

|       |     |                      |                   |          |          |                           |            |            |      |
|-------|-----|----------------------|-------------------|----------|----------|---------------------------|------------|------------|------|
| 12-01 | Gp4 | g.chr5:73931336G>A   | Silent            | ENC1     | p.D252D  | ectodermal-neural corte:  | 140 (0.00) | 21 (0.24)  | 0.63 |
| 12-01 | Gp4 | g.chr1:8926429C>A    | Silent            | ENO1     | p.L192L  | enolase 1, (alpha)        | 82 (0.00)  | 85 (0.14)  | 0.38 |
| 12-01 | Gp4 | g.chr12:7025011G>A   | Silent            | ENO2     | p.K5K    | enolase 2 (gamma, neur)   | 30 (0.00)  | 23 (0.65)  | 1.74 |
| 12-01 | Gp4 | g.chr22:41574581C>A  | Missense Mutation | EP300    | p.A2289D | E1A binding protein p3    | 119 (0.00) | 56 (0.16)  | 0.43 |
| 12-01 | Gp4 | g.chr12:132479459G>A | Missense Mutation | EP400    | p.V929I  | E1A binding protein p4    | 101 (0.00) | 38 (0.24)  | 0.63 |
| 12-01 | Gp4 | g.chr12:132547047C>A | Missense Mutation | EP400    | p.P2712H | E1A binding protein p4    | 58 (0.00)  | 78 (0.29)  | 0.79 |
| 12-01 | Gp4 | g.chr12:132547159G>A | Silent            | EP400    | p.T2749T | E1A binding protein p4    | 62 (0.00)  | 144 (0.27) | 0.72 |
| 12-01 | Gp4 | g.chr3:96706609G>A   | Missense Mutation | EPHA6    | p.V296I  | EPH receptor A6           | 165 (0.00) | 33 (0.27)  | 0.73 |
| 12-01 | Gp4 | g.chr1:23111349C>A   | Nonsense Mutation | EPHB2    | p.C197*  | EPH receptor B2           | 44 (0.00)  | 84 (0.40)  | 1.08 |
| 12-01 | Gp4 | g.chr3:184290477C>T  | Silent            | EPHB3    | p.P123P  | EPH receptor B3           | 84 (0.00)  | 60 (0.47)  | 1.24 |
| 12-01 | Gp4 | g.chr3:184294797G>C  | Missense Mutation | EPHB3    | p.D394H  | EPH receptor B3           | 172 (0.00) | 128 (0.70) | 1.85 |
| 12-01 | Gp4 | g.chr7:142566105C>A  | Silent            | EPHB6    | p.V675V  | EPH receptor B6           | 65 (0.00)  | 152 (0.25) | 0.67 |
| 12-01 | Gp4 | g.chr3:37033464T>C   | Missense Mutation | EPM2AIP1 | p.T369A  | EPM2A (laforin) interac   | 153 (0.00) | 26 (0.69)  | 1.85 |
| 12-01 | Gp4 | g.chr3:37033875G>C   | Missense Mutation | EPM2AIP1 | p.Q232E  | EPM2A (laforin) interac   | 23 (0.00)  | 59 (0.24)  | 0.63 |
| 12-01 | Gp4 | g.chr8:144941145C>T  | Missense Mutation | EPPK1    | p.E2093K | epiplakin 1               | 117 (0.00) | 207 (0.28) | 0.73 |
| 12-01 | Gp4 | g.chr19:16488032C>G  | Missense Mutation | EPS15L1  | p.G761R  | epidermal growth factor   | 45 (0.00)  | 23 (0.70)  | 1.86 |
| 12-01 | Gp4 | g.chr19:16513210G>T  | Silent            | EPS15L1  | p.A571A  | epidermal growth factor   | 31 (0.00)  | 176 (0.39) | 1.05 |
| 12-01 | Gp4 | g.chr12:91363833G>A  | Silent            | EPYC     | p.A262A  | epiphycan                 | 53 (0.00)  | 14 (0.79)  | 2.10 |
| 12-01 | Gp4 | g.chr17:37872078C>A  | Missense Mutation | ERBB2    | p.L467I  | v-erb-b2 avian erythrobl  | 192 (0.00) | 20 (0.80)  | 2.13 |
| 12-01 | Gp4 | g.chr19:45871949T>C  | Missense Mutation | ERCC2    | p.E100G  | excision repair cross-co  | 32 (0.00)  | 51 (0.20)  | 0.66 |
| 12-01 | Gp4 | g.chr9:98774903G>T   | Missense Mutation | ERCC6L2  | p.K338N  | excision repair cross-co  | 17 (0.00)  | 13 (0.92)  | 2.46 |
| 12-01 | Gp4 | g.chr21:39777217C>G  | Intron            | ERG      |          | v-ets avian erythroblastc | 65 (0.00)  | 42 (0.26)  | 0.70 |
| 12-01 | Gp4 | g.chr21:39797669G>T  | Intron            | ERG      |          | v-ets avian erythroblastc | 93 (0.00)  | 48 (0.92)  | 2.44 |
| 12-01 | Gp4 | g.chr21:39797756G>T  | Intron            | ERG      |          | v-ets avian erythroblastc | 186 (0.00) | 69 (0.93)  | 2.47 |
| 12-01 | Gp4 | g.chr21:39812675G>T  | Intron            | ERG      |          | v-ets avian erythroblastc | 15 (0.00)  | 44 (0.68)  | 1.82 |
| 12-01 | Gp4 | g.chr21:39845103G>T  | Intron            | ERG      |          | v-ets avian erythroblastc | 54 (0.00)  | 26 (0.27)  | 0.72 |
| 12-01 | Gp4 | g.chr21:39934778T>A  | Intron            | ERG      |          | v-ets avian erythroblastc | 45 (0.00)  | 13 (0.38)  | 1.03 |
| 12-01 | Gp4 | g.chr21:39940838C>G  | Intron            | ERG      |          | v-ets avian erythroblastc | 184 (0.00) | 48 (0.19)  | 0.50 |
| 12-01 | Gp4 | g.chr21:39953573C>T  | Intron            | ERG      |          | v-ets avian erythroblastc | 124 (0.00) | 19 (0.68)  | 1.82 |
| 12-01 | Gp4 | g.chr21:39984017G>T  | Intron            | ERG      |          | v-ets avian erythroblastc | 108 (0.00) | 36 (0.89)  | 2.37 |
| 12-01 | Gp4 | g.chr21:39998401C>A  | Intron            | ERG      |          | v-ets avian erythroblastc | 37 (0.00)  | 20 (0.35)  | 0.93 |
| 12-01 | Gp4 | g.chr21:40021675C>T  | Intron            | ERG      |          | v-ets avian erythroblastc | 182 (0.00) | 54 (0.24)  | 0.64 |
| 12-01 | Gp4 | g.chr11:124622563G>T | Missense Mutation | ESAM     | p.L114I  | endothelial cell adhesio  | 141 (0.01) | 328 (0.18) | 0.48 |
| 12-01 | Gp4 | g.chr1:17030463G>T   | RNA               | ESPNP    |          | espin pseudogene          | 60 (0.00)  | 94 (0.23)  | 0.62 |
| 12-01 | Gp4 | g.chr7:158534543G>A  | Silent            | ESYT2    | p.H640H  | extended synaptotagmin    | 120 (0.00) | 147 (0.19) | 0.51 |

|       |     |                     |                   |          |         |                                  |            |            |      |
|-------|-----|---------------------|-------------------|----------|---------|----------------------------------|------------|------------|------|
| 12-01 | Gp4 | g.chr7:158536271C>A | Missense Mutation | ESYT2    | p.Q608H | extended synaptotagmin48 (0.00)  | 9 (0.78)   | 2.07       |      |
| 12-01 | Gp4 | g.chr19:44030412T>C | Missense Mutation | ETHE1    | p.S106G | ethylmalonic encephalo]29 (0.00) | 30 (0.23)  | 0.62       |      |
| 12-01 | Gp4 | g.chr3:185775264T>A | Missense Mutation | ETV5     | p.K329N | ets variant 5                    | 113 (0.00) | 40 (0.47)  | 1.27 |
| 12-01 | Gp4 | g.chr6:36336763G>C  | Silent            | ETV7     | p.A250A | ets variant 7                    | 43 (0.00)  | 29 (0.34)  | 0.92 |
| 12-01 | Gp4 | g.chr17:29631316C>A | Nonsense Mutation | EVI2B    | p.E438* | ecotropic viral integrati        | 34 (0.00)  | 34 (0.35)  | 0.94 |
| 12-01 | Gp4 | g.chr1:40980338T>A  | Missense Mutation | EXO5     | p.V41D  | exonuclease 5                    | 148 (0.00) | 208 (0.61) | 1.62 |
| 12-01 | Gp4 | g.chr4:56724546C>A  | Silent            | EXOC1    | p.R19R  | exocyst complex compo            | 20 (0.00)  | 97 (0.45)  | 1.21 |
| 12-01 | Gp4 | g.chr5:453673G>T    | Missense Mutation | EXOC3    | p.D185Y | exocyst complex compo            | 133 (0.00) | 40 (0.28)  | 0.73 |
| 12-01 | Gp4 | g.chr5:454125G>T    | Missense Mutation | EXOC3    | p.E335D | exocyst complex compo            | 143 (0.00) | 21 (0.57)  | 1.52 |
| 12-01 | Gp4 | g.chr17:74084184T>C | Missense Mutation | EXOC7    | p.Y440C | exocyst complex compo            | 17 (0.00)  | 84 (0.30)  | 0.79 |
| 12-01 | Gp4 | g.chr1:231472597G>T | Silent            | EXOC8    | p.R295R | exocyst complex compo            | 129 (0.00) | 75 (0.21)  | 0.57 |
| 12-01 | Gp4 | g.chr8:28574275C>A  | Missense Mutation | EXTL3    | p.D233E | exostosin-like glycosylti        | 193 (0.00) | 42 (0.14)  | 0.38 |
| 12-01 | Gp4 | g.chr8:72184121T>C  | Missense Mutation | EYA1     | p.I280V | EYA transcriptional coa          | 71 (0.00)  | 33 (0.21)  | 0.57 |
| 12-01 | Gp4 | g.chr11:46751050G>C | Silent            | F2       | p.V531V | coagulation factor II (th        | 65 (0.00)  | 39 (0.36)  | 0.96 |
| 12-01 | Gp4 | g.chr16:74750249C>A | Missense Mutation | FA2H     | p.K345N | fatty acid 2-hydroxylase         | 59 (0.00)  | 33 (0.64)  | 0.70 |
| 12-01 | Gp4 | g.chr10:14816527C>A | Missense Mutation | FAM107B  | p.A46S  | family with sequence sii         | 52 (0.00)  | 19 (0.58)  | 1.54 |
| 12-01 | Gp4 | g.chr8:59059472C>A  | Missense Mutation | FAM110B  | p.P228H | family with sequence sii         | 67 (0.00)  | 127 (0.17) | 0.44 |
| 12-01 | Gp4 | g.chr4:187078859C>A | Missense Mutation | FAM149A  | p.L239M | family with sequence sii         | 205 (0.00) | 387 (0.17) | 0.45 |
| 12-01 | Gp4 | g.chr1:55076206C>A  | Missense Mutation | FAM151A  | p.M321I | family with sequence sii         | 63 (0.00)  | 142 (0.31) | 0.83 |
| 12-01 | Gp4 | g.chr11:6235670C>T  | Missense Mutation | FAM160A2 | p.G857E | family with sequence sii         | 199 (0.00) | 289 (0.16) | 0.42 |
| 12-01 | Gp4 | g.chr11:6235677C>T  | Missense Mutation | FAM160A2 | p.A855T | family with sequence sii         | 186 (0.00) | 229 (0.39) | 1.05 |
| 12-01 | Gp4 | g.chr11:6245392C>A  | Missense Mutation | FAM160A2 | p.Q75H  | family with sequence sii         | 34 (0.00)  | 94 (0.47)  | 1.25 |
| 12-01 | Gp4 | g.chr2:29237351C>A  | Missense Mutation | FAM179A  | p.T323K | family with sequence sii         | 175 (0.00) | 85 (0.14)  | 0.38 |
| 12-01 | Gp4 | g.chr12:49993528G>T | Missense Mutation | FAM186B  | p.S632Y | family with sequence sii         | 190 (0.01) | 224 (0.57) | 1.51 |
| 12-01 | Gp4 | g.chr19:35719251C>A | Missense Mutation | FAM187B  | p.Q111H | family with sequence sii         | 292 (0.00) | 47 (0.53)  | 1.42 |
| 12-01 | Gp4 | g.chr5:176952200C>A | Nonsense Mutation | FAM193B  | p.E428* | family with sequence sii         | 84 (0.00)  | 145 (0.24) | 0.64 |
| 12-01 | Gp4 | g.chr17:16347230G>A | Silent            | FAM211A  | p.G197G |                                  | 168 (0.00) | 205 (0.20) | 0.52 |
| 12-01 | Gp4 | g.chr3:49841650G>T  | Missense Mutation | FAM212A  | p.G32C  | family with sequence sii         | 101 (0.00) | 21 (0.24)  | 0.63 |
| 12-01 | Gp4 | g.chr10:88930289C>A | Nonsense Mutation | FAM35A   | p.S563* | family with sequence sii         | 123 (0.00) | 101 (0.52) | 1.40 |
| 12-01 | Gp4 | g.chr1:808748C>A    | lincRNA           | FAM41C   |         | family with sequence sii         | 31 (0.00)  | 33 (0.21)  | 0.57 |
| 12-01 | Gp4 | g.chr1:808820G>T    | lincRNA           | FAM41C   |         | family with sequence sii         | 46 (0.00)  | 31 (0.19)  | 0.52 |
| 12-01 | Gp4 | g.chr3:194407816C>A | Silent            | FAM43A   | p.G87G  | family with sequence sii         | 66 (0.00)  | 105 (0.28) | 0.74 |
| 12-01 | Gp4 | g.chrX:34148368G>T  | Silent            | FAM47A   | p.G676G | family with sequence sii         | 42 (0.00)  | 134 (0.98) | 1.63 |
| 12-01 | Gp4 | g.chr6:3850964G>T   | Missense Mutation | FAM50B   | p.A307S | family with sequence sii         | 73 (0.00)  | 150 (0.15) | 0.49 |
| 12-01 | Gp4 | g.chr5:137681035G>T | Nonsense Mutation | FAM53C   | p.E220* | family with sequence sii         | 100 (0.01) | 105 (0.51) | 1.37 |



|       |     |                     |                   |           |          |                                     |            |      |
|-------|-----|---------------------|-------------------|-----------|----------|-------------------------------------|------------|------|
| 12-01 | Gp4 | g.chr16:67574520G>A | Silent            | FAM65A    | p.R252R  | family with sequence siu 162 (0.01) | 36 (0.25)  | 0.67 |
| 12-01 | Gp4 | g.chr16:67578707A>G | Missense Mutation | FAM65A    | p.E962G  | family with sequence siu 133 (0.00) | 131 (0.39) | 1.04 |
| 12-01 | Gp4 | g.chr20:49225247C>G | Missense Mutation | FAM65C    | p.W234S  | family with sequence siu 16 (0.00)  | 10 (0.60)  | 1.60 |
| 12-01 | Gp4 | g.chr20:49225873C>A | Silent            | FAM65C    | p.G195G  | family with sequence siu 42 (0.00)  | 87 (0.90)  | 2.39 |
| 12-01 | Gp4 | g.chr9:134151502C>T | Missense Mutation | FAM78A    | p.G22D   | family with sequence siu 17 (0.00)  | 42 (0.93)  | 2.48 |
| 12-01 | Gp4 | g.chr16:5143523T>C  | Missense Mutation | FAM86A    | p.K68E   | family with sequence siu 173 (0.00) | 114 (0.15) | 0.40 |
| 12-01 | Gp4 | g.chr11:71507148T>C | Missense Mutation | FAM86C1   | p.L116P  | family with sequence siu 234 (0.00) | 365 (0.15) | 0.41 |
| 12-01 | Gp4 | g.chr3:129821650G>A | RNA               | FAM86HP   |          | family with sequence siu 210 (0.00) | 230 (0.23) | 0.61 |
| 12-01 | Gp4 | g.chr19:53786581C>A | RNA               | FAM90A27P |          | family with sequence siu 52 (0.00)  | 81 (0.32)  | 0.86 |
| 12-01 | Gp4 | g.chr16:89838171C>A | Missense Mutation | FANCA     | p.G689V  | Fanconi anemia, comple 81 (0.00)    | 18 (0.67)  | 0.73 |
| 12-01 | Gp4 | g.chrX:14882828G>A  | Nonsense Mutation | FANCB     | p.Q269*  | Fanconi anemia, comple 16 (0.00)    | 22 (0.27)  | 0.45 |
| 12-01 | Gp4 | g.chr6:35424089A>T  | Nonsense Mutation | FANCE     | p.K272*  | Fanconi anemia, comple 242 (0.00)   | 184 (0.25) | 0.67 |
| 12-01 | Gp4 | g.chr11:22647124G>A | Missense Mutation | FANCF     | p.P78L   | Fanconi anemia, comple 69 (0.01)    | 181 (0.46) | 1.24 |
| 12-01 | Gp4 | g.chr13:99083410G>T | Silent            | FARP1     | p.V673V  | FERM, RhoGEF (ARH) 17 (0.00)        | 30 (0.33)  | 0.89 |
| 12-01 | Gp4 | g.chr17:80039948A>G | Missense Mutation | FASN      | p.Y2034H | fatty acid synthase 30 (0.00)       | 52 (0.15)  | 0.41 |
| 12-01 | Gp4 | g.chr11:92086632G>A | Missense Mutation | FAT3      | p.G302R  | FAT atypical cadherin 3 127 (0.00)  | 14 (0.93)  | 2.48 |
| 12-01 | Gp4 | g.chr11:92531991G>T | Missense Mutation | FAT3      | p.V1788L | FAT atypical cadherin 346 (0.00)    | 12 (0.75)  | 2.00 |
| 12-01 | Gp4 | g.chr4:126238327A>G | Missense Mutation | FAT4      | p.H254R  | FAT atypical cadherin 460 (0.00)    | 26 (0.23)  | 0.62 |
| 12-01 | Gp4 | g.chr4:126336809G>A | Missense Mutation | FAT4      | p.A2231T | FAT atypical cadherin 449 (0.00)    | 21 (0.76)  | 2.03 |
| 12-01 | Gp4 | g.chr3:13663344C>A  | Missense Mutation | FBLN2     | p.S742Y  | fibulin 2 69 (0.00)                 | 38 (0.16)  | 0.42 |
| 12-01 | Gp4 | g.chr3:13678033C>T  | Silent            | FBLN2     | p.F1101F | fibulin 2 127 (0.01)                | 291 (0.26) | 0.70 |
| 12-01 | Gp4 | g.chr19:8176939C>A  | Missense Mutation | FBN3      | p.A1295S | fibrillin 3 164 (0.01)              | 164 (0.44) | 1.17 |
| 12-01 | Gp4 | g.chr19:8191714C>G  | Missense Mutation | FBN3      | p.V767L  | fibrillin 3 45 (0.00)               | 51 (0.31)  | 0.84 |
| 12-01 | Gp4 | g.chr9:97372207T>C  | Missense Mutation | FBP1      | p.D188G  | fructose-1,6-bisphospha 25 (0.00)   | 30 (0.17)  | 0.44 |
| 12-01 | Gp4 | g.chr16:30671626C>A | Missense Mutation | FBRS      | p.L168M  | fibrosin 60 (0.00)                  | 19 (0.26)  | 0.70 |
| 12-01 | Gp4 | g.chr13:77595843C>A | Missense Mutation | FBXL3     | p.L51F   | F-box and leucine-rich r 24 (0.00)  | 20 (0.25)  | 0.67 |
| 12-01 | Gp4 | g.chr9:37512663G>T  | Missense Mutation | FBXO10    | p.L918I  | F-box protein 10 115 (0.00)         | 87 (0.41)  | 1.10 |
| 12-01 | Gp4 | g.chr7:100198172T>C | Missense Mutation | FBXO24    | p.C465R  | F-box protein 24 87 (0.00)          | 50 (0.28)  | 0.75 |
| 12-01 | Gp4 | g.chr1:11721233G>T  | Missense Mutation | FBXO44    | p.W224L  | F-box protein 44 80 (0.00)          | 72 (0.22)  | 0.59 |
| 12-01 | Gp4 | g.chr19:40368748C>A | Silent            | FCGBP     | p.R4200R | Fc fragment of IgG bind 235 (0.00)  | 323 (0.52) | 1.40 |
| 12-01 | Gp4 | g.chr19:40408426C>G | Silent            | FCGBP     | p.L1471L | Fc fragment of IgG bind 110 (0.00)  | 25 (0.20)  | 0.53 |
| 12-01 | Gp4 | g.chr19:40412083G>T | Missense Mutation | FCGBP     | p.S1182Y | Fc fragment of IgG bind 20 (0.00)   | 53 (0.17)  | 0.45 |
| 12-01 | Gp4 | g.chr1:120930076G>A | Silent            | FCGR1B    | p.R175R  | Fc fragment of IgG, high 156 (0.00) | 105 (0.15) | 0.41 |
| 12-01 | Gp4 | g.chr19:17877530C>A | Missense Mutation | FCHO1     | p.L83M   | FCH domain only 1 48 (0.00)         | 211 (0.38) | 1.01 |
| 12-01 | Gp4 | g.chr5:141028989C>A | Silent            | FCHSD1    | p.R40R   | FCH and double SH3 do 293 (0.00)    | 162 (0.18) | 0.48 |

|       |     |                      |                   |         |          |                                                |            |            |      |
|-------|-----|----------------------|-------------------|---------|----------|------------------------------------------------|------------|------------|------|
| 12-01 | Gp4 | g.chr1:157660073G>A  | Silent            | FCRL3   | p.H554H  | Fc receptor-like 3                             | 158 (0.00) | 110 (0.20) | 0.53 |
| 12-01 | Gp4 | g.chr1:161695667C>A  | Missense Mutation | FCRLB   | p.L122M  | Fc receptor-like B                             | 35 (0.00)  | 41 (0.24)  | 0.65 |
| 12-01 | Gp4 | g.chr1:155290344C>G  | Missense Mutation | FDPS    | p.L402V  | farnesyl diphosphate synthase                  | 26 (0.00)  | 32 (0.28)  | 0.75 |
| 12-01 | Gp4 | g.chr11:111746434C>T | Missense Mutation | FDXACB1 | p.D363N  | ferredoxin-fold anticodons                     | 349 (0.00) | 80 (0.74)  | 1.97 |
| 12-01 | Gp4 | g.chr11:61563023C>A  | Missense Mutation | FEN1    | p.L64M   | flap structure-specific endonuclease           | 100 (0.00) | 64 (0.19)  | 0.50 |
| 12-01 | Gp4 | g.chr20:34191789C>G  | RNA               | FER1L4  |          | fer-1-like family member                       | 52 (0.00)  | 33 (0.42)  | 1.13 |
| 12-01 | Gp4 | g.chr2:97368417G>T   | RNA               | FER1L5  |          | fer-1-like family member                       | 70 (0.00)  | 79 (0.30)  | 0.81 |
| 12-01 | Gp4 | g.chr2:97369184T>A   | RNA               | FER1L5  |          | fer-1-like family member                       | 172 (0.00) | 43 (0.44)  | 1.18 |
| 12-01 | Gp4 | g.chr8:38273490G>C   | Missense Mutation | FGFR1   | p.C495W  | fibroblast growth factor receptor              | 39 (0.00)  | 40 (0.42)  | 1.13 |
| 12-01 | Gp4 | g.chr4:1806223C>A    | Silent            | FGFR3   | p.I414I  | fibroblast growth factor receptor              | 243 (0.00) | 280 (0.16) | 0.43 |
| 12-01 | Gp4 | g.chr1:27941967G>T   | Silent            | FGR     | p.I332I  | FGR proto-oncogene, Src family tyrosine kinase | 85 (0.00)  | 92 (0.46)  | 1.22 |
| 12-01 | Gp4 | g.chr16:67265117T>C  | Missense Mutation | FHOD1   | p.I881V  | formin homology 2 domain containing            | 24 (0.00)  | 25 (0.28)  | 0.75 |
| 12-01 | Gp4 | g.chr16:67271462G>T  | Silent            | FHOD1   | p.P255P  | formin homology 2 domain containing            | 90 (0.00)  | 32 (0.28)  | 0.75 |
| 12-01 | Gp4 | g.chr16:67271573C>A  | Silent            | FHOD1   | p.V247V  | formin homology 2 domain containing            | 135 (0.00) | 55 (0.29)  | 0.78 |
| 12-01 | Gp4 | g.chr2:164466520C>T  | Missense Mutation | FIGN    | p.E608K  | fidgetin                                       | 100 (0.00) | 58 (0.88)  | 2.34 |
| 12-01 | Gp4 | g.chr20:42935854C>T  | Nonsense Mutation | FITM2   | p.W67*   | fat storage-inducing transmembrane protein     | 139 (0.00) | 49 (0.22)  | 0.60 |
| 12-01 | Gp4 | g.chr9:115935823G>T  | Silent            | FKBP15  | p.A814A  | FK506 binding protein 15                       | 128 (0.00) | 51 (0.96)  | 2.56 |
| 12-01 | Gp4 | g.chr12:2910436T>C   | Missense Mutation | FKBP4   | p.C396R  | FK506 binding protein 4                        | 121 (0.00) | 17 (0.41)  | 1.10 |
| 12-01 | Gp4 | g.chr1:152281450G>T  | Missense Mutation | FLG     | p.A1971E | filaggrin                                      | 148 (0.00) | 579 (0.22) | 0.60 |
| 12-01 | Gp4 | g.chrX:153586707C>T  | Missense Mutation | FLNA    | p.V1539M | filamin A, alpha                               | 44 (0.00)  | 141 (0.32) | 0.53 |
| 12-01 | Gp4 | g.chrX:153594432C>A  | Silent            | FLNA    | p.V463V  | filamin A, alpha                               | 19 (0.00)  | 48 (0.27)  | 0.45 |
| 12-01 | Gp4 | g.chr3:58108844G>T   | Nonsense Mutation | FLNB    | p.E1051* | filamin B, beta                                | 177 (0.01) | 106 (0.16) | 0.43 |
| 12-01 | Gp4 | g.chr7:128493020G>A  | Missense Mutation | FLNC    | p.G2048D | filamin C, gamma                               | 151 (0.00) | 282 (0.25) | 0.67 |
| 12-01 | Gp4 | g.chr7:128493063C>G  | Missense Mutation | FLNC    | p.F2062L | filamin C, gamma                               | 153 (0.00) | 242 (0.38) | 1.01 |
| 12-01 | Gp4 | g.chr7:128496574G>T  | Missense Mutation | FLNC    | p.E2418D | filamin C, gamma                               | 35 (0.00)  | 34 (0.38)  | 1.02 |
| 12-01 | Gp4 | g.chr5:180057024G>T  | Missense Mutation | FLT4    | p.H199N  | fms-related tyrosine kinase                    | 35 (0.00)  | 107 (0.16) | 0.42 |
| 12-01 | Gp4 | g.chr1:213058696C>A  | Missense Mutation | FLVCR1  | p.S385Y  | feline leukemia virus surface glycoprotein     | 33 (0.00)  | 170 (0.26) | 0.71 |
| 12-01 | Gp4 | g.chr15:33256353T>C  | Silent            | FMN1    | p.K1031K | formin 1                                       | 36 (0.00)  | 34 (0.15)  | 0.47 |
| 12-01 | Gp4 | g.chr2:153468117G>T  | Missense Mutation | FMNL2   | p.D354Y  | formin-like 2                                  | 116 (0.00) | 26 (0.27)  | 0.72 |
| 12-01 | Gp4 | g.chr17:80685017C>T  | Silent            | FN3KRP  | p.S300S  | fructosamine 3-kinase related                  | 80 (0.00)  | 283 (0.30) | 0.80 |
| 12-01 | Gp4 | g.chr6:159654079C>T  | Silent            | FNDC1   | p.P845P  | fibronectin type III domain                    | 92 (0.00)  | 54 (0.30)  | 0.79 |
| 12-01 | Gp4 | g.chr6:159657323C>G  | Missense Mutation | FNDC1   | p.I1348M | fibronectin type III domain                    | 116 (0.00) | 165 (0.19) | 0.52 |
| 12-01 | Gp4 | g.chr6:159659697G>T  | Splice Site       | FNDC1   | p.D1394Y | fibronectin type III domain                    | 176 (0.00) | 209 (0.50) | 1.33 |
| 12-01 | Gp4 | g.chr1:33330239C>A   | Missense Mutation | FNDC5   | p.W145L  | fibronectin type III domain                    | 133 (0.01) | 28 (0.71)  | 1.90 |
| 12-01 | Gp4 | g.chr17:33454077G>T  | Nonsense Mutation | FNDC8   | p.E76*   | fibronectin type III domain                    | 136 (0.00) | 99 (0.34)  | 0.92 |

|       |     |                      |                   |          |         |                                      |            |      |
|-------|-----|----------------------|-------------------|----------|---------|--------------------------------------|------------|------|
| 12-01 | Gp4 | g.chr5:156770451A>G  | Missense Mutation | FNDC9    | p.Y32H  | fibronectin type III dom 71 (0.01)   | 40 (0.88)  | 2.33 |
| 12-01 | Gp4 | g.chr4:159790335G>C  | Silent            | FNIP2    | p.V849V | folliculin interacting pro 88 (0.00) | 52 (0.48)  | 1.28 |
| 12-01 | Gp4 | g.chr14:29237161C>A  | Missense Mutation | FOXG1    | p.Q226K | forkhead box G1 21 (0.00)            | 37 (0.32)  | 0.86 |
| 12-01 | Gp4 | g.chr6:108985100C>G  | Nonsense Mutation | FOXO3    | p.S355* | forkhead box O3 58 (0.00)            | 102 (0.26) | 0.71 |
| 12-01 | Gp4 | g.chrX:49113934G>C   | Missense Mutation | FOXP3    | p.T135S | forkhead box P3 60 (0.00)            | 49 (0.51)  | 0.85 |
| 12-01 | Gp4 | g.chr9:130571977G>T  | Nonsense Mutation | FPGS     | p.E359* | folylpolyglutamate synt 16 (0.00)    | 116 (0.51) | 1.36 |
| 12-01 | Gp4 | g.chr7:127233973C>G  | Missense Mutation | FSCN3    | p.S22R  | fascin actin-bundling pr 40 (0.00)   | 14 (0.36)  | 0.95 |
| 12-01 | Gp4 | g.chr9:133493183G>T  | Splice Site       | FUBP3    |         | far upstream element (F 183 (0.00)   | 55 (0.25)  | 0.68 |
| 12-01 | Gp4 | g.chr16:70512224G>T  | Silent            | FUK      | p.V388V | fucokinase 104 (0.01)                | 99 (0.18)  | 0.48 |
| 12-01 | Gp4 | g.chr16:70513512G>T  | Nonsense Mutation | FUK      | p.E553* | fucokinase 91 (0.00)                 | 27 (0.19)  | 0.49 |
| 12-01 | Gp4 | g.chr2:84518192G>A   | RNA               | FUNDC2P2 |         | FUN14 domain containi 151 (0.00)     | 146 (0.16) | 0.42 |
| 12-01 | Gp4 | g.chr2:202900651G>A  | Silent            | FZD7     | p.A427A | frizzled class receptor 7 206 (0.00) | 219 (0.26) | 0.71 |
| 12-01 | Gp4 | g.chr2:202900660C>G  | Missense Mutation | FZD7     | p.F430L | frizzled class receptor 7 225 (0.00) | 241 (0.14) | 0.38 |
| 12-01 | Gp4 | g.chr19:3533324C>A   | Silent            | FZR1     | p.I425I | fizzy/cell division cycle 47 (0.00)  | 63 (0.40)  | 1.06 |
| 12-01 | Gp4 | g.chr4:46388155G>A   | Silent            | GABRA2   | p.I41I  | gamma-aminobutyric ac 15 (0.00)      | 11 (0.91)  | 2.42 |
| 12-01 | Gp4 | g.chr3:30842485G>T   | Silent            | GADL1    | p.I382I | glutamate decarboxylas 43 (0.00)     | 31 (0.19)  | 0.52 |
| 12-01 | Gp4 | g.chr17:73760120C>T  | Silent            | GALK1    | p.G71G  | galactokinase 1 21 (0.00)            | 83 (0.22)  | 0.58 |
| 12-01 | Gp4 | g.chr11:11394156C>A  | Missense Mutation | GALNT18  | p.C333F | polypeptide N-acetylga 91 (0.00)     | 17 (0.76)  | 2.04 |
| 12-01 | Gp4 | g.chr12:6647054C>G   | Missense Mutation | GAPDH    | p.T277S | glyceraldehyde-3-phosp 71 (0.00)     | 109 (0.22) | 0.59 |
| 12-01 | Gp4 | g.chr2:26411090C>A   | Silent            | GAREML   | p.I653I | GRB2 associated, regul 37 (0.00)     | 13 (0.62)  | 1.64 |
| 12-01 | Gp4 | g.chr9:130111223C>A  | Missense Mutation | GARNL3   | p.F484L | GTPase activating Rap/ 181 (0.00)    | 280 (0.15) | 0.40 |
| 12-01 | Gp4 | g.chr7:30662010G>A   | Silent            | GARS     | p.V515V | glycyl-tRNA synthetase 146 (0.00)    | 32 (0.19)  | 0.50 |
| 12-01 | Gp4 | g.chr17:34072865C>A  | Missense Mutation | GAS2L2   | p.G551W | growth arrest-specific 2 71 (0.00)   | 95 (0.16)  | 0.42 |
| 12-01 | Gp4 | g.chr3:128200781C>A  | Missense Mutation | GATA2    | p.A342S | GATA binding protein 2 54 (0.00)     | 40 (0.25)  | 0.67 |
| 12-01 | Gp4 | g.chr8:11606470G>T   | Missense Mutation | GATA4    | p.C220F | GATA binding protein 4 106 (0.00)    | 75 (0.87)  | 2.31 |
| 12-01 | Gp4 | g.chr10:104111673C>A | Missense Mutation | GBF1     | p.S163Y | golgi brefeldin A resista 120 (0.00) | 27 (0.30)  | 0.79 |
| 12-01 | Gp4 | g.chr7:127224686G>A  | Missense Mutation | GCC1     | p.A184V | GRIP and coiled-coil do 243 (0.00)   | 569 (0.21) | 0.55 |
| 12-01 | Gp4 | g.chr12:56143659G>T  | Missense Mutation | GDF11    | p.C406F | growth differentiation fa 330 (0.00) | 187 (0.14) | 0.39 |
| 12-01 | Gp4 | g.chr8:97172721G>A   | Missense Mutation | GDF6     | p.P67L  | growth differentiation fa 70 (0.01)  | 85 (0.89)  | 2.38 |
| 12-01 | Gp4 | g.chrX:153668373T>C  | Silent            | GDI1     | p.F158F | GDP dissociation inhibi 238 (0.00)   | 188 (0.34) | 0.57 |
| 12-01 | Gp4 | g.chr15:90784504G>T  | Missense Mutation | GDPGP1   | p.V122L | GDP-D-glucose phosph 129 (0.00)      | 38 (0.16)  | 0.42 |
| 12-01 | Gp4 | g.chr7:932000C>A     | Missense Mutation | GET4     | p.P231T | golgi to ER traffic prote 95 (0.00)  | 100 (0.60) | 1.60 |
| 12-01 | Gp4 | g.chr1:92941638T>C   | Missense Mutation | GFI1     | p.Q406R | growth factor independe 111 (0.00)   | 161 (0.18) | 0.48 |
| 12-01 | Gp4 | g.chr2:69590792A>G   | Silent            | GFPT1    | p.D78D  | glutamine--fructose-6-ph 29 (0.00)   | 13 (0.62)  | 1.64 |
| 12-01 | Gp4 | g.chr5:179729474C>A  | Silent            | GFPT2    | p.V651V | glutamine-fructose-6-ph 96 (0.00)    | 76 (0.28)  | 0.74 |

|       |     |                      |                   |         |          |                                      |            |      |
|-------|-----|----------------------|-------------------|---------|----------|--------------------------------------|------------|------|
| 12-01 | Gp4 | g.chr5:179762902G>T  | Missense Mutation | GFPT2   | p.A89D   | glutamine-fructose-6-ph 63 (0.00)    | 80 (0.39)  | 1.03 |
| 12-01 | Gp4 | g.chr17:61958867G>T  | Missense Mutation | GH2     | p.S8Y    | growth hormone 2 129 (0.00)          | 195 (0.43) | 1.15 |
| 12-01 | Gp4 | g.chr7:100279366C>A  | Missense Mutation | GIGYF1  | p.E1028D | GRB10 interacting GYF23 (0.00)       | 12 (0.42)  | 1.11 |
| 12-01 | Gp4 | g.chr7:100279523G>T  | Silent            | GIGYF1  | p.R1007R | GRB10 interacting GYF28 (0.00)       | 32 (0.31)  | 0.83 |
| 12-01 | Gp4 | g.chr7:100279602G>A  | Silent            | GIGYF1  | p.S980S  | GRB10 interacting GYF34 (0.00)       | 47 (0.53)  | 1.42 |
| 12-01 | Gp4 | g.chr7:150325503G>A  | Silent            | GIMAP6  | p.L61L   | GTPase, IMAP family n251 (0.00)      | 129 (0.90) | 2.40 |
| 12-01 | Gp4 | g.chr6:149903591A>T  | Missense Mutation | GINM1   | p.M245L  | glycoprotein integral mc 16 (0.00)   | 17 (0.53)  | 1.41 |
| 12-01 | Gp4 | g.chr1:147231201T>C  | Missense Mutation | GJA5    | p.Q49R   | gap junction protein, alp 122 (0.00) | 91 (0.20)  | 0.53 |
| 12-01 | Gp4 | g.chr7:99526695G>A   | Silent            | GJC3    | p.S183S  | gap junction protein, ga198 (0.00)   | 65 (0.28)  | 0.74 |
| 12-01 | Gp4 | g.chr11:134244891C>T | Missense Mutation | GLB1L2  | p.A617V  | galactosidase, beta 1-lik 49 (0.00)  | 71 (0.80)  | 2.14 |
| 12-01 | Gp4 | g.chr1:1263140C>A    | Silent            | GLTPD1  | p.P214P  | 19 (0.00)                            | 24 (0.29)  | 0.78 |
| 12-01 | Gp4 | g.chr20:62234356T>C  | Missense Mutation | GMEB2   | p.K107E  | glucocorticoid modulato 158 (0.00)   | 88 (0.41)  | 1.09 |
| 12-01 | Gp4 | g.chr19:3162860G>T   | Missense Mutation | GNA15   | p.C323F  | guanine nucleotide bind 17 (0.00)    | 32 (0.84)  | 2.25 |
| 12-01 | Gp4 | g.chr20:57415432G>T  | Missense Mutation | GNAS    | p.A91S   | GNAS complex locus 21 (0.00)         | 41 (0.85)  | 2.28 |
| 12-01 | Gp4 | g.chr20:57430127C>A  | Missense Mutation | GNAS    | p.P603T  | GNAS complex locus 44 (0.00)         | 31 (0.52)  | 1.38 |
| 12-01 | Gp4 | g.chr7:100275190G>A  | Missense Mutation | GNB2    | p.A113T  | guanine nucleotide bind 92 (0.00)    | 108 (0.25) | 0.67 |
| 12-01 | Gp4 | g.chr12:133365693C>T | Missense Mutation | GOLGA3  | p.V911I  | golgin A3 30 (0.00)                  | 34 (0.24)  | 0.63 |
| 12-01 | Gp4 | g.chr14:93282601G>T  | Missense Mutation | GOLGA5  | p.K442N  | golgin A5 62 (0.00)                  | 16 (0.69)  | 1.83 |
| 12-01 | Gp4 | g.chr3:121409730T>A  | Silent            | GOLGB1  | p.S2827S | golgin B1 27 (0.00)                  | 13 (0.62)  | 1.64 |
| 12-01 | Gp4 | g.chr3:121414616G>A  | Missense Mutation | GOLGB1  | p.T1585I | golgin B1 45 (0.00)                  | 14 (0.71)  | 1.90 |
| 12-01 | Gp4 | g.chr17:42477590C>T  | Missense Mutation | GPATCH8 | p.G619R  | G patch domain contain 71 (0.00)     | 21 (0.81)  | 0.67 |
| 12-01 | Gp4 | g.chr7:1131454G>T    | Missense Mutation | GPBR1   | p.E30D   | G protein-coupled estro 42 (0.02)    | 76 (0.33)  | 0.88 |
| 12-01 | Gp4 | g.chr19:34890923C>T  | Silent            | GPI     | p.R553R  | glucose-6-phosphate iso 21 (0.00)    | 72 (0.31)  | 0.81 |
| 12-01 | Gp4 | g.chrX:129518973G>T  | Missense Mutation | GPR119  | p.A150D  | G protein-coupled recep 107 (0.00)   | 522 (0.36) | 0.59 |
| 12-01 | Gp4 | g.chr8:37672423C>A   | Missense Mutation | GPR124  | p.S92R   | G protein-coupled recep 59 (0.00)    | 34 (0.35)  | 0.94 |
| 12-01 | Gp4 | g.chr1:6314868C>G    | Missense Mutation | GPR153  | p.G33A   | G protein-coupled recep 50 (0.00)    | 15 (0.33)  | 0.89 |
| 12-01 | Gp4 | g.chr2:175346384A>G  | Missense Mutation | GPR155  | p.S101P  | G protein-coupled recep 18 (0.00)    | 38 (0.24)  | 0.63 |
| 12-01 | Gp4 | g.chr17:36499008C>A  | Missense Mutation | GPR179  | p.G222V  | G protein-coupled recep 171 (0.00)   | 143 (0.34) | 0.91 |
| 12-01 | Gp4 | g.chr1:202097478G>T  | Missense Mutation | GPR37L1 | p.V414L  | G protein-coupled recep 50 (0.00)    | 19 (0.42)  | 1.12 |
| 12-01 | Gp4 | g.chrX:19018024C>A   | Missense Mutation | GPR64   | p.G759V  | G protein-coupled recep 137 (0.00)   | 143 (0.49) | 0.82 |
| 12-01 | Gp4 | g.chr16:57713101G>C  | Missense Mutation | GPR97   | p.G169R  | G protein-coupled recep 42 (0.00)    | 29 (0.38)  | 1.01 |
| 12-01 | Gp4 | g.chr5:176026731C>T  | Silent            | GPRIN1  | p.L35L   | G protein regulated indu 24 (0.00)   | 71 (0.30)  | 0.79 |
| 12-01 | Gp4 | g.chr19:35501033G>C  | Missense Mutation | GRAMD1A | p.Q114H  | GRAM domain containi 127 (0.00)      | 46 (0.54)  | 1.45 |
| 12-01 | Gp4 | g.chr12:52407694G>T  | Missense Mutation | GRASP   | p.K194N  | GRP1 (general receptor 221 (0.00)    | 300 (0.20) | 0.52 |
| 12-01 | Gp4 | g.chr7:50660759C>T   | Missense Mutation | GRB10   | p.D559N  | growth factor receptor-b 79 (0.00)   | 20 (0.25)  | 0.67 |

|       |     |                      |                     |            |          |                                     |            |      |
|-------|-----|----------------------|---------------------|------------|----------|-------------------------------------|------------|------|
| 12-01 | Gp4 | g.chr17:37900322G>T  | Splice Site         | GRB7       |          | growth factor receptor-b 185 (0.00) | 9 (0.67)   | 1.78 |
| 12-01 | Gp4 | g.chr2:11758601C>T   | Silent              | GREB1      | p.P1200P | growth regulation by est26 (0.00)   | 68 (0.22)  | 0.59 |
| 12-01 | Gp4 | g.chr2:11778031C>A   | Missense Mutation   | GREB1      | p.L1846M | growth regulation by est109 (0.00)  | 41 (0.83)  | 2.21 |
| 12-01 | Gp4 | g.chr2:10101415A>T   | Silent              | GRHL1      | p.A173A  | grainyhead-like 1 (Dros, 114 (0.00) | 27 (0.52)  | 1.38 |
| 12-01 | Gp4 | g.chr2:10101474A>G   | Missense Mutation   | GRHL1      | p.D193G  | grainyhead-like 1 (Dros, 109 (0.00) | 36 (0.58)  | 1.56 |
| 12-01 | Gp4 | g.chr11:120531057G>T | Silent              | GRIK4      | p.L10L   | glutamate receptor, iono65 (0.00)   | 26 (0.42)  | 1.13 |
| 12-01 | Gp4 | g.chr11:120673486C>A | Missense Mutation   | GRIK4      | p.P56H   | glutamate receptor, iono169 (0.00)  | 305 (0.37) | 0.99 |
| 12-01 | Gp4 | g.chr8:145066891G>C  | Missense Mutation   | GRINA      | p.G333A  | glutamate receptor, iono52 (0.00)   | 63 (0.54)  | 1.44 |
| 12-01 | Gp4 | g.chr12:66838489C>A  | Missense Mutation   | GRIP1      | p.G469V  | glutamate receptor inter:65 (0.00)  | 35 (0.29)  | 0.76 |
| 12-01 | Gp4 | g.chr3:14565978G>C   | RNA                 | GRIP2      |          | glutamate receptor inter:45 (0.00)  | 20 (0.55)  | 1.47 |
| 12-01 | Gp4 | g.chr4:3011390G>A    | Silent              | GRK4       | p.K184K  | G protein-coupled recep81 (0.00)    | 72 (0.53)  | 1.41 |
| 12-01 | Gp4 | g.chr5:176867836G>C  | Missense Mutation   | GRK6       | p.E480Q  | G protein-coupled recep55 (0.00)    | 108 (0.27) | 0.72 |
| 12-01 | Gp4 | g.chr6:146351275G>T  | Missense Mutation   | GRM1       | p.D208Y  | glutamate receptor, met:239 (0.00)  | 166 (0.70) | 1.86 |
| 12-01 | Gp4 | g.chr6:146755377C>A  | Silent              | GRM1       | p.P1010P | glutamate receptor, met:141 (0.00)  | 18 (0.56)  | 1.48 |
| 12-01 | Gp4 | g.chr3:51746729C>T   | Missense Mutation   | GRM2       | p.R231C  | glutamate receptor, met:38 (0.00)   | 61 (0.39)  | 1.05 |
| 12-01 | Gp4 | g.chr8:144641663G>A  | Missense Mutation   | GSDMD      | p.R53H   | gasdermin D 117 (0.01)              | 210 (0.37) | 0.99 |
| 12-01 | Gp4 | g.chr19:42740862C>T  | Missense Mutation   | GSK3A      | p.E188K  | glycogen synthase kinas224 (0.00)   | 158 (0.22) | 0.59 |
| 12-01 | Gp4 | g.chr7:73960133C>G   | Missense Mutation   | GTF2IRD1   | p.R576G  | GTF2I repeat domain cc76 (0.00)     | 20 (0.60)  | 1.60 |
| 12-01 | Gp4 | g.chr7:74015455C>A   | Missense Mutation   | GTF2IRD1   | p.S905Y  | GTF2I repeat domain cc107 (0.00)    | 52 (0.58)  | 1.54 |
| 12-01 | Gp4 | g.chr7:72663632G>T   | RNA                 | GTF2IRD2P1 |          | GTF2I repeat domain cc45 (0.00)     | 25 (0.48)  | 1.28 |
| 12-01 | Gp4 | g.chr22:39112955A>G  | Missense Mutation   | GTPBP1     | p.T262A  | GTP binding protein 1 25 (0.00)     | 42 (0.19)  | 0.51 |
| 12-01 | Gp4 | g.chr6:42141344C>A   | De novo Start OutOf | GUCA1A     |          | guanylate cyclase activa34 (0.00)   | 24 (0.79)  | 2.11 |
| 12-01 | Gp4 | g.chr22:23994828C>A  | RNA                 | GUSBP11    |          | glucuronidase, beta pse19 (0.00)    | 33 (0.67)  | 1.78 |
| 12-01 | Gp4 | g.chr17:73774702G>T  | Missense Mutation   | H3F3B      | p.R129S  | H3 histone, family 3B (163 (0.00)   | 15 (0.80)  | 2.13 |
| 12-01 | Gp4 | g.chr10:115343033T>A | Missense Mutation   | HABP2      | p.F385I  | hyaluronan binding prot73 (0.00)    | 10 (0.50)  | 1.33 |
| 12-01 | Gp4 | g.chr5:140076196C>A  | Missense Mutation   | HARS2      | p.H275N  | histidyl-tRNA synthetas80 (0.00)    | 13 (0.54)  | 1.44 |
| 12-01 | Gp4 | g.chr19:17160833G>T  | Silent              | HAUS8      | p.P361P  | HAUS augmin-like com38 (0.00)       | 58 (0.38)  | 1.01 |
| 12-01 | Gp4 | g.chr5:156533798C>A  | Missense Mutation   | HAVCR2     | p.W78C   | hepatitis A virus cellula43 (0.00)  | 11 (0.91)  | 2.42 |
| 12-01 | Gp4 | g.chr12:123187369G>A | Silent              | HCAR2      | p.I154I  | hydroxycarboxylic acid30 (0.00)     | 26 (0.96)  | 2.56 |
| 12-01 | Gp4 | g.chr1:32798625G>A   | Missense Mutation   | HDAC1      | p.E477K  | histone deacetylase 1 62 (0.00)     | 59 (0.66)  | 1.76 |
| 12-01 | Gp4 | g.chr17:42164884C>A  | Missense Mutation   | HDAC5      | p.D595Y  | histone deacetylase 5 38 (0.00)     | 59 (0.58)  | 0.48 |
| 12-01 | Gp4 | g.chr7:18536059T>A   | Intron              | HDAC9      |          | histone deacetylase 9 62 (0.00)     | 128 (0.37) | 0.98 |
| 12-01 | Gp4 | g.chr7:18653016T>C   | Intron              | HDAC9      |          | histone deacetylase 9 41 (0.00)     | 18 (0.33)  | 0.89 |
| 12-01 | Gp4 | g.chr7:18834294G>A   | Intron              | HDAC9      |          | histone deacetylase 9 19 (0.00)     | 30 (0.97)  | 2.58 |
| 12-01 | Gp4 | g.chr7:18928188C>G   | Intron              | HDAC9      |          | histone deacetylase 9 112 (0.00)    | 200 (0.19) | 0.51 |

|       |     |                      |                   |           |          |                                         |            |            |      |
|-------|-----|----------------------|-------------------|-----------|----------|-----------------------------------------|------------|------------|------|
| 12-01 | Gp4 | g.chr1:156714014G>A  | Missense Mutation | HDGF      | p.P144S  | hepatoma-derived growth factor          | 194 (0.00) | 106 (0.22) | 0.58 |
| 12-01 | Gp4 | g.chrX:83724041T>C   | Silent            | HDX       | p.S230S  | highly divergent homeodomain            | 94 (0.01)  | 20 (0.30)  | 0.50 |
| 12-01 | Gp4 | g.chr17:58147124C>A  | Missense Mutation | HEATR6    | p.R296L  | HEAT repeat containing                  | 22 (0.00)  | 23 (0.74)  | 1.97 |
| 12-01 | Gp4 | g.chr12:112605667G>T | Nonsense Mutation | HECTD4    | p.S3942* | HECT domain containing                  | 71 (0.00)  | 68 (0.26)  | 0.71 |
| 12-01 | Gp4 | g.chr20:62195450G>T  | Silent            | HELZ2     | p.P1575P | helicase with zinc finger               | 37 (0.00)  | 57 (0.18)  | 0.47 |
| 12-01 | Gp4 | g.chr15:63961749C>G  | Missense Mutation | HERC1     | p.A2732P | HECT and RLD domain                     | 98 (0.00)  | 35 (0.86)  | 2.29 |
| 12-01 | Gp4 | g.chr15:64045210G>T  | Missense Mutation | HERC1     | p.R617S  | HECT and RLD domain                     | 29 (0.00)  | 44 (0.86)  | 2.30 |
| 12-01 | Gp4 | g.chr15:28421857G>A  | Nonsense Mutation | HERC2     | p.Q3164* | HECT and RLD domain                     | 198 (0.00) | 95 (0.48)  | 1.53 |
| 12-01 | Gp4 | g.chr15:28465677T>C  | Silent            | HERC2     | p.G1922G | HECT and RLD domain                     | 65 (0.00)  | 404 (0.14) | 0.45 |
| 12-01 | Gp4 | g.chr15:20645820C>A  | RNA               | HERC2P3   |          | hect domain and RLD 2                   | 67 (0.00)  | 73 (0.26)  | 0.69 |
| 12-01 | Gp4 | g.chr8:43033312G>C   | Missense Mutation | HGSNAT    | p.W316S  | heparan-alpha-glucosaminidase           | 86 (0.01)  | 481 (0.62) | 1.66 |
| 12-01 | Gp4 | g.chr14:100129278G>A | Missense Mutation | HHIPL1    | p.G523D  | HHIP-like 1                             | 28 (0.00)  | 32 (0.16)  | 0.42 |
| 12-01 | Gp4 | g.chr1:222717022C>T  | Silent            | HHIPL2    | p.L277L  | HHIP-like 2                             | 231 (0.00) | 213 (0.20) | 0.53 |
| 12-01 | Gp4 | g.chr1:222717079G>T  | Silent            | HHIPL2    | p.L258L  | HHIP-like 2                             | 153 (0.00) | 160 (0.18) | 0.48 |
| 12-01 | Gp4 | g.chr1:114515787C>A  | Missense Mutation | HIPK1     | p.P1096T | homeodomain interacting protein kinase  | 250 (0.00) | 107 (0.31) | 0.82 |
| 12-01 | Gp4 | g.chr19:40895462G>T  | Silent            | HIPK4     | p.V116V  | homeodomain interacting protein kinase  | 78 (0.00)  | 19 (0.26)  | 0.70 |
| 12-01 | Gp4 | g.chr6:26017380G>T   | Missense Mutation | HIST1H1A  | p.A194E  | histone cluster 1, H1a                  | 338 (0.00) | 355 (0.15) | 0.40 |
| 12-01 | Gp4 | g.chr6:26217216G>T   | Missense Mutation | HIST1H2AE | p.G5V    | histone cluster 1, H2ae                 | 143 (0.00) | 83 (0.37)  | 1.00 |
| 12-01 | Gp4 | g.chr6:27782177G>A   | Silent            | HIST1H2AJ | p.A114A  | histone cluster 1, H2aj                 | 351 (0.00) | 640 (0.23) | 0.61 |
| 12-01 | Gp4 | g.chr1:228646069G>T  | Missense Mutation | HIST3H2BB | p.R80L   | histone cluster 3, H2bb                 | 242 (0.00) | 49 (0.57)  | 1.52 |
| 12-01 | Gp4 | g.chr1:42049227G>A   | Silent            | HIVEP3    | p.Y414Y  | human immunodeficiency virus type 1     | 110 (0.00) | 180 (0.21) | 0.56 |
| 12-01 | Gp4 | g.chr10:71005875G>A  | Missense Mutation | HKDC1     | p.V306I  | hexokinase domain containing            | 147 (0.00) | 60 (0.48)  | 1.29 |
| 12-01 | Gp4 | g.chr5:149391885C>A  | Nonsense Mutation | HMGXB3    | p.S293*  | HMG box domain containing               | 128 (0.00) | 112 (0.84) | 2.24 |
| 12-01 | Gp4 | g.chr22:35782782G>T  | Silent            | HMOX1     | p.L83L   | heme oxygenase (decycling)              | 118 (0.00) | 104 (0.14) | 0.38 |
| 12-01 | Gp4 | g.chr5:137089356G>T  | Missense Mutation | HNRNPA0   | p.Q134K  | heterogeneous nuclear ribonucleoprotein | 46 (0.00)  | 88 (0.72)  | 1.91 |
| 12-01 | Gp4 | g.chr5:177632851T>A  | Missense Mutation | HNRNPAB   | p.F73Y   | heterogeneous nuclear ribonucleoprotein | 78 (0.00)  | 12 (0.92)  | 2.44 |
| 12-01 | Gp4 | g.chr19:39329574G>T  | Missense Mutation | HNRNPL    | p.L439I  | heterogeneous nuclear ribonucleoprotein | 191 (0.00) | 65 (0.26)  | 0.70 |
| 12-01 | Gp4 | g.chr19:8550618C>A   | Missense Mutation | HNRNPM    | p.R436S  | heterogeneous nuclear ribonucleoprotein | 35 (0.00)  | 126 (0.98) | 2.62 |
| 12-01 | Gp4 | g.chr7:27237952A>T   | Missense Mutation | HOXA13    | p.N344K  | homeobox A13                            | 83 (0.00)  | 19 (0.47)  | 1.26 |
| 12-01 | Gp4 | g.chr17:46628084G>T  | Missense Mutation | HOXB3     | p.A230E  | homeobox B3                             | 174 (0.00) | 155 (0.20) | 0.53 |
| 12-01 | Gp4 | g.chr17:46628302C>G  | Silent            | HOXB3     | p.R157R  | homeobox B3                             | 222 (0.00) | 100 (0.59) | 1.57 |
| 12-01 | Gp4 | g.chr17:46673918C>A  | Nonsense Mutation | HOXB6     | p.E178*  | homeobox B6                             | 141 (0.00) | 139 (0.32) | 0.84 |
| 12-01 | Gp4 | g.chr2:176996285C>A  | Missense Mutation | HOXD8     | p.T89K   | homeobox D8                             | 228 (0.00) | 23 (0.70)  | 1.86 |
| 12-01 | Gp4 | g.chr19:35551373C>A  | Missense Mutation | HPN       | p.L193I  | hepsin                                  | 59 (0.00)  | 15 (0.53)  | 1.42 |
| 12-01 | Gp4 | g.chr10:100183562C>A | Nonsense Mutation | HPS1      | p.G494*  | Hermansky-Pudlak syndrome               | 78 (0.00)  | 118 (0.25) | 0.66 |

|       |     |                      |                   |              |          |                            |             |            |      |
|-------|-----|----------------------|-------------------|--------------|----------|----------------------------|-------------|------------|------|
| 12-01 | Gp4 | g.chr10:100185633G>T | Missense Mutation | HPS1         | p.P366H  | Hermansky-Pudlak sync      | 113 (0.00)  | 234 (0.35) | 0.92 |
| 12-01 | Gp4 | g.chr10:103825928C>T | Missense Mutation | HPS6         | p.L233F  | Hermansky-Pudlak sync      | 41 (0.00)   | 66 (0.26)  | 0.69 |
| 12-01 | Gp4 | g.chr10:100242409C>A | Nonsense Mutation | HPSE2        | p.E533*  | heparanase 2 (inactive)    | 96 (0.00)   | 25 (0.88)  | 2.35 |
| 12-01 | Gp4 | g.chr20:60791752G>T  | Missense Mutation | HRH3         | p.F216L  | histamine receptor H3      | 59 (0.00)   | 65 (0.28)  | 0.74 |
| 12-01 | Gp4 | g.chr1:152187003C>A  | Nonsense Mutation | HRNR         | p.E2368* | hornerin                   | 305 (0.00)  | 352 (0.43) | 1.14 |
| 12-01 | Gp4 | g.chr2:20818775G>T   | Missense Mutation | HS1BP3       | p.P384Q  | HCLS1 binding protein      | 20 (0.00)   | 78 (0.42)  | 1.13 |
| 12-01 | Gp4 | g.chrX:131763087C>T  | Missense Mutation | HS6ST2       | p.V368M  | heparan sulfate 6-O-sulf   | 81 (0.00)   | 125 (0.57) | 0.95 |
| 12-01 | Gp4 | g.chr15:62538122G>A  | RNA               | hsa-mir-7162 |          |                            | 19 (0.00)   | 43 (0.44)  | 1.18 |
| 12-01 | Gp4 | g.chr12:104335293G>T | Nonsense Mutation | HSP90B1      | p.E400*  | heat shock protein 90kD    | 45 (0.00)   | 16 (0.50)  | 1.33 |
| 12-01 | Gp4 | g.chr1:22151052C>A   | Missense Mutation | HSPG2        | p.G4241V | heparan sulfate proteogl   | 16 (0.00)   | 28 (0.43)  | 1.14 |
| 12-01 | Gp4 | g.chr6:78172847C>A   | Missense Mutation | HTR1B        | p.A92S   | 5-hydroxytryptamine (ser   | 165 (0.00)  | 145 (0.52) | 1.38 |
| 12-01 | Gp4 | g.chr2:118629096T>C  | RNA               | HTR5BP       |          | 5-hydroxytryptamine (ser   | 26 (0.00)   | 22 (0.36)  | 0.97 |
| 12-01 | Gp4 | g.chr21:33347027G>C  | Missense Mutation | HUNK         | p.G391R  | hormonally up-regulatec    | 190 (0.00)  | 107 (0.30) | 0.80 |
| 12-01 | Gp4 | g.chr6:656356C>T     | Missense Mutation | HUS1B        | p.V197M  | HUS1 checkpoint homo       | 59 (0.00)   | 604 (0.27) | 0.71 |
| 12-01 | Gp4 | g.chr11:118919222G>T | Missense Mutation | HYOU1        | p.A678D  | hypoxia up-regulated 1     | 145 (0.00)  | 295 (0.19) | 0.51 |
| 12-01 | Gp4 | g.chr9:21304776G>C   | Missense Mutation | IFNA5        | p.S160R  | interferon, alpha 5        | 67 (0.00)   | 43 (0.95)  | 2.54 |
| 12-01 | Gp4 | g.chr19:39759354G>T  | Missense Mutation | IFNL2        | p.M16I   | interferon, lambda 2       | 34 (0.00)   | 52 (0.58)  | 1.54 |
| 12-01 | Gp4 | g.chr1:24483654C>G   | Missense Mutation | IFNLR1       | p.R510T  | interferon, lambda recep   | 67 (0.00)   | 141 (0.30) | 0.79 |
| 12-01 | Gp4 | g.chr16:1573590G>T   | Missense Mutation | IFT140       | p.R322S  | intraflagellar transport   | 133 (0.00)  | 18 (0.39)  | 1.04 |
| 12-01 | Gp4 | g.chr16:1573650C>A   | Missense Mutation | IFT140       | p.V302L  | intraflagellar transport   | 133 (0.00)  | 35 (0.71)  | 1.90 |
| 12-01 | Gp4 | g.chr14:76488689C>A  | Missense Mutation | IFT43        | p.P56H   | intraflagellar transport   | 4297 (0.00) | 218 (0.52) | 1.38 |
| 12-01 | Gp4 | g.chr6:160461622C>T  | Missense Mutation | IGF2R        | p.T449I  | insulin-like growth fact   | 192 (0.01)  | 47 (0.77)  | 2.04 |
| 12-01 | Gp4 | g.chr14:106311243C>A | RNA               | IGHD         |          | immunoglobulin heavy c     | 15 (0.00)   | 82 (0.16)  | 0.42 |
| 12-01 | Gp4 | g.chr14:106110267C>A | RNA               | IGHG2        |          | immunoglobulin heavy c     | 261 (0.00)  | 116 (0.17) | 0.46 |
| 12-01 | Gp4 | g.chr14:106610440C>A | RNA               | IGHV3-15     |          | immunoglobulin heavy c     | 215 (0.00)  | 13 (0.92)  | 2.46 |
| 12-01 | Gp4 | g.chr14:106780822G>T | RNA               | IGHV4-28     |          | immunoglobulin heavy c     | 66 (0.00)   | 27 (0.26)  | 0.69 |
| 12-01 | Gp4 | g.chr2:87565706T>C   | RNA               | IGKV3OR2-268 |          | immunoglobulin kappa c     | 137 (0.00)  | 187 (0.21) | 0.57 |
| 12-01 | Gp4 | g.chr22:22677244C>T  | RNA               | IGLV1-51     |          | immunoglobulin lambda c    | 70 (0.00)   | 53 (0.17)  | 0.45 |
| 12-01 | Gp4 | g.chr22:23135410C>T  | RNA               | IGLV2-11     |          | immunoglobulin lambda c    | 386 (0.00)  | 59 (0.66)  | 1.76 |
| 12-01 | Gp4 | g.chr3:118645055C>T  | Missense Mutation | IGSF11       | p.G158D  | immunoglobulin superfc     | 67 (0.00)   | 32 (0.22)  | 0.58 |
| 12-01 | Gp4 | g.chr1:18688614C>T   | Missense Mutation | IGSF21       | p.P144S  | immunoglobulin superfar    | 94 (0.00)   | 85 (0.41)  | 1.10 |
| 12-01 | Gp4 | g.chr7:50450332C>G   | Silent            | IKZF1        | p.P172P  | IKAROS family zinc fir     | 53 (0.00)   | 14 (0.93)  | 2.48 |
| 12-01 | Gp4 | g.chr2:102851700C>A  | Silent            | IL1RL2       | p.V547V  | interleukin 1 receptor-lil | 146 (0.00)  | 139 (0.17) | 0.44 |
| 12-01 | Gp4 | g.chr16:27457345G>T  | Missense Mutation | IL21R        | p.W268L  | interleukin 21 receptor    | 63 (0.00)   | 226 (0.35) | 0.92 |
| 12-01 | Gp4 | g.chr3:49062441C>A   | Nonsense Mutation | IMPDH2       | p.E395*  | IMP (inosine 5'-monoph     | 74 (0.00)   | 24 (0.21)  | 0.56 |

|       |     |                      |                   |        |         |                                             |            |      |
|-------|-----|----------------------|-------------------|--------|---------|---------------------------------------------|------------|------|
| 12-01 | Gp4 | g.chr14:105173672C>A | Silent            | INF2   | p.A356A | inverted formin, FH2 an20 (0.00)            | 21 (0.57)  | 1.52 |
| 12-01 | Gp4 | g.chr7:30795187G>T   | Missense Mutation | INMT   | p.C171F | indolethylamine N-meth42 (0.00)             | 17 (0.47)  | 1.25 |
| 12-01 | Gp4 | g.chr2:206874360G>A  | Silent            | INO80D | p.P567P | INO80 complex subunit 49 (0.00)             | 13 (0.92)  | 2.46 |
| 12-01 | Gp4 | g.chr2:99170746G>T   | Missense Mutation | INPP4A | p.V459F | inositol polyphosphate- $\zeta$ 50 (0.00)   | 74 (0.24)  | 0.65 |
| 12-01 | Gp4 | g.chr4:142986771A>T  | Intron            | INPP4B |         | inositol polyphosphate- $\zeta$ 201 (0.00)  | 19 (0.74)  | 1.96 |
| 12-01 | Gp4 | g.chr4:143079223G>C  | Intron            | INPP4B |         | inositol polyphosphate- $\zeta$ 67 (0.00)   | 171 (0.99) | 2.65 |
| 12-01 | Gp4 | g.chr4:143103814C>A  | Intron            | INPP4B |         | inositol polyphosphate- $\zeta$ 118 (0.01)  | 370 (0.31) | 0.81 |
| 12-01 | Gp4 | g.chr4:143133465C>A  | Intron            | INPP4B |         | inositol polyphosphate- $\zeta$ 87 (0.00)   | 159 (0.24) | 0.64 |
| 12-01 | Gp4 | g.chr4:143253613G>A  | Intron            | INPP4B |         | inositol polyphosphate- $\zeta$ 31 (0.00)   | 89 (0.35)  | 0.93 |
| 12-01 | Gp4 | g.chr4:143253738T>C  | Intron            | INPP4B |         | inositol polyphosphate- $\zeta$ 158 (0.00)  | 53 (0.47)  | 1.26 |
| 12-01 | Gp4 | g.chr4:143254373G>A  | Intron            | INPP4B |         | inositol polyphosphate- $\zeta$ 64 (0.00)   | 83 (0.81)  | 2.15 |
| 12-01 | Gp4 | g.chr4:143486592G>T  | Intron            | INPP4B |         | inositol polyphosphate- $\zeta$ 34 (0.00)   | 14 (0.50)  | 1.33 |
| 12-01 | Gp4 | g.chr10:134511411C>T | Silent            | INPP5A | p.D154D | inositol polyphosphate- $\zeta$ 68 (0.00)   | 17 (0.47)  | 1.25 |
| 12-01 | Gp4 | g.chr10:134595414C>G | Missense Mutation | INPP5A | p.A403G | inositol polyphosphate- $\zeta$ 58 (0.00)   | 116 (0.17) | 0.46 |
| 12-01 | Gp4 | g.chr1:38341328C>T   | Missense Mutation | INPP5B | p.D580N | inositol polyphosphate- $\zeta$ 142 (0.00)  | 30 (0.23)  | 0.62 |
| 12-01 | Gp4 | g.chr1:156814916C>T  | Missense Mutation | INSRR  | p.V797M | insulin receptor-related 16 (0.00)          | 14 (0.71)  | 1.90 |
| 12-01 | Gp4 | g.chr7:1539625G>T    | Silent            | INTS1  | p.S193S | integrator complex subu57 (0.00)            | 136 (0.22) | 0.59 |
| 12-01 | Gp4 | g.chr7:1539838G>T    | Missense Mutation | INTS1  | p.P172T | integrator complex subu17 (0.00)            | 22 (0.64)  | 1.70 |
| 12-01 | Gp4 | g.chr7:1539973C>G    | Missense Mutation | INTS1  | p.E127Q | integrator complex subu22 (0.00)            | 30 (0.63)  | 1.69 |
| 12-01 | Gp4 | g.chr6:33703133T>C   | Missense Mutation | IP6K3  | p.K41E  | inositol hexakisphospha 102 (0.00)          | 30 (0.27)  | 0.71 |
| 12-01 | Gp4 | g.chr14:24652863C>T  | Missense Mutation | IPO4   | p.E666K | importin 4 76 (0.01)                        | 49 (0.29)  | 0.76 |
| 12-01 | Gp4 | g.chr2:237240106G>A  | Nonsense Mutation | IQCA1  | p.Q757* | IQ motif containing witl75 (0.01)           | 41 (0.15)  | 0.39 |
| 12-01 | Gp4 | g.chr1:156524042C>A  | Missense Mutation | IQGAP3 | p.G478V | IQ motif containing GT1232 (0.00)           | 120 (0.44) | 1.18 |
| 12-01 | Gp4 | g.chr3:10242180G>C   | Missense Mutation | IRAK2  | p.M135I | interleukin-1 receptor-a $\zeta$ 111 (0.00) | 79 (0.24)  | 0.64 |
| 12-01 | Gp4 | g.chr2:227663199G>T  | Missense Mutation | IRS1   | p.L86I  | insulin receptor substrat 101 (0.00)        | 65 (0.20)  | 0.53 |
| 12-01 | Gp4 | g.chr16:313345G>T    | Silent            | ITFG3  | p.L352L | integrin alpha FG-GAP 81 (0.00)             | 68 (0.31)  | 0.82 |
| 12-01 | Gp4 | g.chr16:313357G>T    | Missense Mutation | ITFG3  | p.Q356H | integrin alpha FG-GAP 76 (0.00)             | 62 (0.15)  | 0.39 |
| 12-01 | Gp4 | g.chr17:48165116G>T  | Silent            | ITGA3  | p.V976V | integrin, alpha 3 (antige15 (0.00)          | 103 (0.74) | 1.97 |
| 12-01 | Gp4 | g.chr2:173344450G>A  | Silent            | ITGA6  | p.G490G | integrin, alpha 6 203 (0.00)                | 28 (0.75)  | 2.00 |
| 12-01 | Gp4 | g.chr12:56088645C>T  | Missense Mutation | ITGA7  | p.G709R | integrin, alpha 7 24 (0.00)                 | 57 (0.16)  | 0.42 |
| 12-01 | Gp4 | g.chr10:15760847G>T  | Silent            | ITGA8  | p.I87I  | integrin, alpha 8 107 (0.00)                | 31 (0.29)  | 0.77 |
| 12-01 | Gp4 | g.chr16:30500650G>A  | Missense Mutation | ITGAL  | p.D386N | integrin, alpha L (antige169 (0.00)         | 222 (0.79) | 2.10 |
| 12-01 | Gp4 | g.chr16:31374362G>T  | Missense Mutation | ITGAX  | p.G489V | integrin, alpha X (comp139 (0.00)           | 28 (0.93)  | 2.48 |
| 12-01 | Gp4 | g.chr16:31374687C>A  | Missense Mutation | ITGAX  | p.H568N | integrin, alpha X (comp125 (0.00)           | 75 (0.67)  | 1.78 |
| 12-01 | Gp4 | g.chr17:45360756G>T  | Nonsense Mutation | ITGB3  | p.E68*  | integrin, beta 3 (platelet 157 (0.00)       | 43 (0.53)  | 1.43 |



|       |     |                      |                   |             |          |                            |            |            |      |
|-------|-----|----------------------|-------------------|-------------|----------|----------------------------|------------|------------|------|
| 12-01 | Gp4 | g.chr17:45360782C>A  | Missense Mutation | ITGB3       | p.P65T   | integrin, beta 3 (platelet | 142 (0.00) | 41 (0.37)  | 0.98 |
| 12-01 | Gp4 | g.chr17:73720822C>G  | Silent            | ITGB4       | p.L13L   | integrin, beta 4           | 48 (0.00)  | 33 (0.82)  | 2.18 |
| 12-01 | Gp4 | g.chr13:102345046G>T | Missense Mutation | ITGBL1      | p.C376F  | integrin, beta-like 1 (wit | 33 (0.00)  | 36 (0.97)  | 2.59 |
| 12-01 | Gp4 | g.chr3:4735230G>A    | Silent            | ITPR1       | p.Q1347Q | inositol 1,4,5-trisphosph  | 57 (0.00)  | 302 (0.31) | 0.83 |
| 12-01 | Gp4 | g.chr3:4777015G>C    | Missense Mutation | ITPR1       | p.E1826Q | inositol 1,4,5-trisphosph  | 160 (0.00) | 32 (0.16)  | 0.42 |
| 12-01 | Gp4 | g.chr6:33632693C>G   | Missense Mutation | ITPR3       | p.Q399E  | inositol 1,4,5-trisphosph  | 42 (0.00)  | 71 (0.69)  | 1.84 |
| 12-01 | Gp4 | g.chr21:35144397G>A  | Missense Mutation | ITSN1       | p.E359K  | intersectin 1 (SH3 doma    | 155 (0.00) | 113 (0.20) | 0.54 |
| 12-01 | Gp4 | g.chr20:10620269C>T  | Silent            | JAG1        | p.L1178L | jagged 1                   | 257 (0.00) | 84 (0.93)  | 2.48 |
| 12-01 | Gp4 | g.chr19:17945438C>A  | Silent            | JAK3        | p.P764P  | Janus kinase 3             | 49 (0.00)  | 52 (0.52)  | 1.38 |
| 12-01 | Gp4 | g.chr4:6066665G>A    | Missense Mutation | JAKMIP1     | p.S458F  | janus kinase and microt    | 16 (0.00)  | 81 (0.84)  | 2.24 |
| 12-01 | Gp4 | g.chr10:133978212G>A | Silent            | JAKMIP3     | p.K819K  | Janus kinase and microt    | 119 (0.00) | 160 (0.16) | 0.42 |
| 12-01 | Gp4 | g.chr14:59970655C>G  | Silent            | JKAMP       | p.S267S  | JNK1/MAPK8-associat        | 24 (0.00)  | 11 (0.82)  | 2.18 |
| 12-01 | Gp4 | g.chr9:711775C>T     | Missense Mutation | KANK1       | p.R337W  | KN motif and ankyrin r     | 113 (0.00) | 222 (0.17) | 0.44 |
| 12-01 | Gp4 | g.chr12:49065621G>A  | Nonsense Mutation | KANSL2      | p.R224*  | KAT8 regulatory NSL c      | 354 (0.00) | 21 (0.38)  | 1.02 |
| 12-01 | Gp4 | g.chr12:49075351G>A  | Missense Mutation | KANSL2      | p.S22F   | KAT8 regulatory NSL c      | 80 (0.01)  | 87 (0.20)  | 0.52 |
| 12-01 | Gp4 | g.chr16:31141380G>A  | Missense Mutation | KAT8        | p.D272N  | K(lysine) acetyltransfer   | 149 (0.00) | 166 (0.53) | 1.41 |
| 12-01 | Gp4 | g.chr22:24057376G>T  | RNA               | KB-1572G7.2 |          |                            | 54 (0.00)  | 107 (0.19) | 0.50 |
| 12-01 | Gp4 | g.chr13:41705742G>T  | Silent            | KBTBD6      | p.R302R  | kelch repeat and BTB (F    | 191 (0.00) | 15 (0.53)  | 1.42 |
| 12-01 | Gp4 | g.chr13:41767330G>A  | Missense Mutation | KBTBD7      | p.P355L  | kelch repeat and BTB (F    | 200 (0.01) | 166 (0.40) | 1.06 |
| 12-01 | Gp4 | g.chr13:41768210G>T  | Missense Mutation | KBTBD7      | p.L62M   | kelch repeat and BTB (F    | 51 (0.00)  | 16 (0.50)  | 1.33 |
| 12-01 | Gp4 | g.chr11:30034154C>A  | Missense Mutation | KCNA4       | p.Q24H   | potassium voltage-gated    | 96 (0.00)  | 132 (0.15) | 0.40 |
| 12-01 | Gp4 | g.chr7:119914831G>A  | Missense Mutation | KCND2       | p.G49S   | potassium voltage-gated    | 215 (0.00) | 72 (0.58)  | 1.56 |
| 12-01 | Gp4 | g.chr2:223917781G>A  | Missense Mutation | KCNE4       | p.R129Q  | potassium voltage-gated    | 111 (0.00) | 103 (0.24) | 0.65 |
| 12-01 | Gp4 | g.chr12:49944024C>A  | Silent            | KCNH3       | p.I610I  | potassium voltage-gated    | 105 (0.00) | 36 (0.31)  | 0.81 |
| 12-01 | Gp4 | g.chr2:155555618G>A  | Missense Mutation | KCNJ3       | p.D111N  | potassium inwardly-rect    | 29 (0.00)  | 138 (0.78) | 2.09 |
| 12-01 | Gp4 | g.chr6:39159201C>A   | Missense Mutation | KCNK5       | p.G322V  | potassium channel, subf    | 63 (0.02)  | 131 (0.49) | 1.30 |
| 12-01 | Gp4 | g.chr20:62065176G>T  | Silent            | KCNQ2       | p.T368T  | potassium voltage-gated    | 63 (0.00)  | 254 (0.29) | 0.78 |
| 12-01 | Gp4 | g.chr20:43723847G>T  | Silent            | KCNS1       | p.G415G  | potassium voltage-gated    | 70 (0.00)  | 52 (0.19)  | 0.51 |
| 12-01 | Gp4 | g.chr9:138676699C>T  | Silent            | KCNT1       | p.I1040I | potassium channel, subf    | 102 (0.00) | 132 (0.17) | 0.46 |
| 12-01 | Gp4 | g.chr8:36694435C>A   | Missense Mutation | KCNU1       | p.T497K  | potassium channel, subf    | 37 (0.00)  | 21 (0.29)  | 0.76 |
| 12-01 | Gp4 | g.chr9:2718265C>T    | Silent            | KCNV2       | p.L176L  | potassium channel, subf    | 39 (0.00)  | 103 (0.20) | 0.54 |
| 12-01 | Gp4 | g.chr11:67017668C>A  | Missense Mutation | KDM2A       | p.L723M  | lysine (K)-specific dem    | 51 (0.00)  | 60 (0.40)  | 1.07 |
| 12-01 | Gp4 | g.chr12:121877717G>T | Missense Mutation | KDM2B       | p.L1258M | lysine (K)-specific dem    | 20 (0.00)  | 51 (0.16)  | 0.42 |
| 12-01 | Gp4 | g.chr12:121880349C>A | Silent            | KDM2B       | p.L965L  | lysine (K)-specific dem    | 47 (0.00)  | 32 (0.38)  | 1.00 |
| 12-01 | Gp4 | g.chr1:44137344G>A   | Missense Mutation | KDM4A       | p.S511N  | lysine (K)-specific dem    | 92 (0.00)  | 127 (0.65) | 1.74 |

|       |     |                      |                   |           |          |                                     |            |            |      |
|-------|-----|----------------------|-------------------|-----------|----------|-------------------------------------|------------|------------|------|
| 12-01 | Gp4 | g.chrY:21871395C>G   | Missense Mutation | KDM5D     | p.E962Q  | lysine (K)-specific demethylase     | 68 (0.00)  | 36 (0.36)  | 0.60 |
| 12-01 | Gp4 | g.chr19:10602816C>A  | Missense Mutation | KEAP1     | p.K254N  | kelch-like ECH-associated protein 1 | 20 (0.00)  | 29 (0.55)  | 1.47 |
| 12-01 | Gp4 | g.chr17:26960924T>A  | Missense Mutation | KIAA0100  | p.H1084L | KIAA0100                            | 206 (0.00) | 218 (0.14) | 0.38 |
| 12-01 | Gp4 | g.chr3:197409461G>T  | Missense Mutation | KIAA0226  | p.P669H  | KIAA0226                            | 34 (0.00)  | 52 (0.27)  | 0.72 |
| 12-01 | Gp4 | g.chr3:197411072C>A  | Missense Mutation | KIAA0226  | p.R601S  | KIAA0226                            | 375 (0.00) | 50 (0.90)  | 2.40 |
| 12-01 | Gp4 | g.chr3:197411073C>G  | Missense Mutation | KIAA0226  | p.R601T  | KIAA0226                            | 376 (0.00) | 50 (0.90)  | 2.40 |
| 12-01 | Gp4 | g.chr6:24570198C>A   | Missense Mutation | KIAA0319  | p.A642S  | KIAA0319                            | 157 (0.00) | 112 (0.24) | 0.64 |
| 12-01 | Gp4 | g.chr1:35900546G>T   | Silent            | KIAA0319L | p.P1033P | KIAA0319-like                       | 24 (0.00)  | 56 (0.46)  | 1.24 |
| 12-01 | Gp4 | g.chr4:154504783C>A  | Missense Mutation | KIAA0922  | p.S340Y  | KIAA0922                            | 15 (0.00)  | 21 (0.67)  | 1.78 |
| 12-01 | Gp4 | g.chr22:45601572G>T  | Missense Mutation | KIAA0930  | p.T118N  | KIAA0930                            | 41 (0.02)  | 35 (0.46)  | 1.22 |
| 12-01 | Gp4 | g.chr7:141364773T>C  | Missense Mutation | KIAA1147  | p.D345G  | KIAA1147                            | 121 (0.00) | 76 (0.14)  | 0.39 |
| 12-01 | Gp4 | g.chr5:175786508C>A  | Missense Mutation | KIAA1191  | p.A2S    | KIAA1191                            | 52 (0.00)  | 92 (0.84)  | 2.23 |
| 12-01 | Gp4 | g.chr2:99449372G>C   | Missense Mutation | KIAA1211L | p.R110G  | KIAA1211-like                       | 121 (0.00) | 25 (0.96)  | 2.56 |
| 12-01 | Gp4 | g.chr10:24790385G>C  | Missense Mutation | KIAA1217  | p.G321R  | KIAA1217                            | 53 (0.00)  | 135 (0.20) | 0.53 |
| 12-01 | Gp4 | g.chr6:138649248G>T  | Missense Mutation | KIAA1244  | p.D1698Y | KIAA1244                            | 55 (0.00)  | 21 (0.81)  | 2.16 |
| 12-01 | Gp4 | g.chr10:30315979G>C  | Missense Mutation | KIAA1462  | p.P1033R | KIAA1462                            | 95 (0.00)  | 338 (0.23) | 0.61 |
| 12-01 | Gp4 | g.chr11:33564204T>A  | Silent            | KIAA1549L | p.L68L   | KIAA1549-like                       | 167 (0.01) | 101 (0.34) | 0.90 |
| 12-01 | Gp4 | g.chr10:118704478A>G | Missense Mutation | KIAA1598  | p.L223P  | KIAA1598                            | 38 (0.00)  | 71 (0.15)  | 0.41 |
| 12-01 | Gp4 | g.chr10:118704485G>A | Silent            | KIAA1598  | p.L221L  | KIAA1598                            | 41 (0.00)  | 79 (0.96)  | 2.57 |
| 12-01 | Gp4 | g.chr19:18375564G>T  | Missense Mutation | KIAA1683  | p.P929H  | KIAA1683                            | 16 (0.00)  | 16 (0.50)  | 1.33 |
| 12-01 | Gp4 | g.chr20:36841588C>A  | Missense Mutation | KIAA1755  | p.L1153F | KIAA1755                            | 49 (0.00)  | 87 (0.28)  | 0.74 |
| 12-01 | Gp4 | g.chr9:115380721A>T  | Missense Mutation | KIAA1958  | p.Y581F  | KIAA1958                            | 201 (0.00) | 61 (0.28)  | 0.74 |
| 12-01 | Gp4 | g.chr9:116859896G>A  | Silent            | KIF12     | p.Y29Y   | kinesin family member 12            | 57 (0.00)  | 63 (0.97)  | 2.58 |
| 12-01 | Gp4 | g.chr6:17764413C>A   | Missense Mutation | KIF13A    | p.Q1782H | kinesin family member 13A           | 49 (0.00)  | 103 (0.19) | 0.52 |
| 12-01 | Gp4 | g.chr8:28974376C>T   | Missense Mutation | KIF13B    | p.R1270K | kinesin family member 13B           | 94 (0.00)  | 122 (0.95) | 2.54 |
| 12-01 | Gp4 | g.chr6:168440757C>A  | Missense Mutation | KIF25     | p.S169R  | kinesin family member 25            | 62 (0.00)  | 48 (0.48)  | 1.28 |
| 12-01 | Gp4 | g.chr1:245847643G>T  | Silent            | KIF26B    | p.L789L  | kinesin family member 26B           | 17 (0.00)  | 58 (0.17)  | 0.46 |
| 12-01 | Gp4 | g.chr1:245849618C>G  | Silent            | KIF26B    | p.S1111S | kinesin family member 26B           | 63 (0.00)  | 142 (0.18) | 0.47 |
| 12-01 | Gp4 | g.chr2:26204495G>C   | Missense Mutation | KIF3C     | p.Q98E   | kinesin family member 3C            | 124 (0.00) | 20 (0.60)  | 1.60 |
| 12-01 | Gp4 | g.chr10:32344791G>C  | Missense Mutation | KIF5B     | p.D37E   | kinesin family member 5B            | 22 (0.00)  | 23 (0.96)  | 2.55 |
| 12-01 | Gp4 | g.chr2:149868143C>A  | Silent            | KIF5C     | p.R943R  | kinesin family member 5C            | 234 (0.00) | 107 (0.21) | 0.55 |
| 12-01 | Gp4 | g.chr2:149868162C>A  | Missense Mutation | KIF5C     | p.S949Y  | kinesin family member 5C            | 122 (0.00) | 94 (0.66)  | 1.76 |
| 12-01 | Gp4 | g.chr1:158064860C>A  | Missense Mutation | KIRREL    | p.H556N  | kin of IRRE like (Drosophila)       | 19 (0.00)  | 17 (0.47)  | 1.25 |
| 12-01 | Gp4 | g.chr19:36352045C>A  | Missense Mutation | KIRREL2   | p.L360M  | kin of IRRE like 2 (Drosophila)     | 25 (0.00)  | 42 (0.38)  | 1.02 |
| 12-01 | Gp4 | g.chr19:36355562C>T  | Missense Mutation | KIRREL2   | p.H580Y  | kin of IRRE like 2 (Drosophila)     | 31 (0.00)  | 27 (0.30)  | 0.79 |

|       |     |                     |                   |            |          |                           |            |            |      |
|-------|-----|---------------------|-------------------|------------|----------|---------------------------|------------|------------|------|
| 12-01 | Gp4 | g.chr3:126071183G>A | Missense Mutation | KLF15      | p.P195S  | Kruppel-like factor 15    | 26 (0.00)  | 16 (0.44)  | 1.17 |
| 12-01 | Gp4 | g.chr3:47385082C>A  | Missense Mutation | KLHL18     | p.P459H  | kelch-like family memb    | 133 (0.00) | 38 (0.26)  | 0.70 |
| 12-01 | Gp4 | g.chr22:20796616C>T | Missense Mutation | KLHL22     | p.G550D  | kelch-like family memb    | 36 (0.00)  | 152 (0.38) | 1.02 |
| 12-01 | Gp4 | g.chr15:86311695G>A | Silent            | KLHL25     | p.F449F  | kelch-like family memb    | 116 (0.01) | 63 (0.43)  | 1.14 |
| 12-01 | Gp4 | g.chr8:124664814T>A | Missense Mutation | KLHL38     | p.K118M  | kelch-like family memb    | 70 (0.00)  | 22 (0.59)  | 1.58 |
| 12-01 | Gp4 | g.chr19:36228072G>T | Missense Mutation | KMT2B      | p.Q2486H | lysine (K)-specific meth  | 34 (0.00)  | 131 (0.41) | 1.10 |
| 12-01 | Gp4 | g.chr12:49421034C>G | Missense Mutation | KMT2D      | p.Q4905H | lysine (K)-specific meth  | 241 (0.00) | 36 (0.67)  | 1.78 |
| 12-01 | Gp4 | g.chr12:49431455T>A | Silent            | KMT2D      | p.A3228A | lysine (K)-specific meth  | 36 (0.00)  | 46 (0.52)  | 1.39 |
| 12-01 | Gp4 | g.chr12:49432115C>A | Missense Mutation | KMT2D      | p.E3008D | lysine (K)-specific meth  | 95 (0.00)  | 61 (0.21)  | 0.57 |
| 12-01 | Gp4 | g.chr12:49438082C>A | Missense Mutation | KMT2D      | p.G1697C | lysine (K)-specific meth  | 56 (0.00)  | 39 (0.21)  | 0.55 |
| 12-01 | Gp4 | g.chr19:47986586C>A | Missense Mutation | KPTN       | p.E120D  | kaptin (actin binding prc | 41 (0.00)  | 109 (0.18) | 0.49 |
| 12-01 | Gp4 | g.chr17:39023105T>C | Missense Mutation | KRT12      | p.I112V  | keratin 12                | 467 (0.00) | 16 (0.31)  | 0.83 |
| 12-01 | Gp4 | g.chr17:39502471C>G | Missense Mutation | KRT33A     | p.C372S  | keratin 33A               | 193 (0.00) | 110 (0.97) | 2.59 |
| 12-01 | Gp4 | g.chr17:39578538C>A | Missense Mutation | KRT37      | p.W294L  | keratin 37                | 139 (0.00) | 176 (0.38) | 1.02 |
| 12-01 | Gp4 | g.chr12:52863639C>A | Missense Mutation | KRT6C      | p.E413D  | keratin 6C                | 86 (0.00)  | 28 (0.36)  | 0.95 |
| 12-01 | Gp4 | g.chr12:53170963C>A | Missense Mutation | KRT76      | p.G38V   | keratin 76                | 92 (0.00)  | 210 (0.48) | 1.28 |
| 12-01 | Gp4 | g.chr12:53233610C>A | Silent            | KRT78      | p.T402T  | keratin 78                | 147 (0.00) | 56 (0.30)  | 0.81 |
| 12-01 | Gp4 | g.chr12:53227700C>A | Missense Mutation | KRT79      | p.Q115H  | keratin 79                | 46 (0.00)  | 59 (0.24)  | 0.63 |
| 12-01 | Gp4 | g.chr12:52567401C>G | Missense Mutation | KRT80      | p.A272P  | keratin 80                | 61 (0.00)  | 38 (0.29)  | 0.77 |
| 12-01 | Gp4 | g.chr12:52695720G>A | Missense Mutation | KRT86      | p.C7Y    | keratin 86                | 140 (0.00) | 72 (0.26)  | 0.70 |
| 12-01 | Gp4 | g.chr17:39197554G>A | Silent            | KRTAP1-1   | p.T32T   | keratin associated protei | 63 (0.00)  | 175 (0.98) | 2.61 |
| 12-01 | Gp4 | g.chr21:46117767C>A | Silent            | KRTAP10-12 | p.P217P  | keratin associated protei | 83 (0.00)  | 62 (0.35)  | 0.95 |
| 12-01 | Gp4 | g.chr21:46021588G>T | Missense Mutation | KRTAP10-7  | p.R356L  | keratin associated protei | 93 (0.00)  | 51 (0.16)  | 0.42 |
| 12-01 | Gp4 | g.chr21:46032355C>A | Missense Mutation | KRTAP10-8  | p.P113H  | keratin associated protei | 110 (0.00) | 234 (0.16) | 0.43 |
| 12-01 | Gp4 | g.chr21:46047178C>A | Silent            | KRTAP10-9  | p.P30P   | keratin associated protei | 31 (0.00)  | 83 (0.16)  | 0.42 |
| 12-01 | Gp4 | g.chr21:46086467C>A | Missense Mutation | KRTAP12-2  | p.V113F  | keratin associated protei | 102 (0.00) | 129 (0.40) | 1.05 |
| 12-01 | Gp4 | g.chr21:32127545C>G | Missense Mutation | KRTAP21-1  | p.G51A   | keratin associated protei | 61 (0.00)  | 93 (0.95)  | 2.52 |
| 12-01 | Gp4 | g.chr21:31973565T>C | Silent            | KRTAP22-1  | p.S42S   | keratin associated protei | 82 (0.00)  | 20 (0.50)  | 1.33 |
| 12-01 | Gp4 | g.chr17:39316477T>C | Missense Mutation | KRTAP4-4   | p.Y156C  | keratin associated protei | 99 (0.00)  | 96 (0.16)  | 0.42 |
| 12-01 | Gp4 | g.chr11:71276967G>T | Missense Mutation | KRTAP5-10  | p.G112W  | keratin associated protei | 92 (0.00)  | 43 (0.16)  | 0.43 |
| 12-01 | Gp4 | g.chr11:71293483G>T | Missense Mutation | KRTAP5-11  | p.S134Y  | keratin associated protei | 128 (0.00) | 86 (0.26)  | 0.68 |
| 12-01 | Gp4 | g.chr11:1718786G>T  | Missense Mutation | KRTAP5-6   | p.C104F  | keratin associated protei | 153 (0.00) | 148 (0.41) | 1.08 |
| 12-01 | Gp4 | g.chr17:39388899C>G | Missense Mutation | KRTAP9-3   | p.P49R   | keratin associated protei | 67 (0.00)  | 248 (0.57) | 1.52 |
| 12-01 | Gp4 | g.chrX:153130125C>T | Silent            | L1CAM      | p.A1027A | L1 cell adhesion molecu   | 92 (0.01)  | 153 (0.26) | 0.44 |
| 12-01 | Gp4 | g.chr22:41605757G>A | Missense Mutation | L3MBTL2    | p.G28S   | l(3)mbt-like 2 (Drosoph   | 91 (0.00)  | 129 (0.51) | 1.36 |

|       |     |                      |                   |           |          |                           |            |            |      |
|-------|-----|----------------------|-------------------|-----------|----------|---------------------------|------------|------------|------|
| 12-01 | Gp4 | g.chr22:41625645C>A  | Missense Mutation | L3MBTL2   | p.P664T  | l(3)mbt-like 2 (Drosoph   | 53 (0.00)  | 110 (0.19) | 0.51 |
| 12-01 | Gp4 | g.chr1:201356225G>T  | Silent            | LAD1      | p.I88I   | ladinin 1                 | 17 (0.00)  | 30 (0.23)  | 0.62 |
| 12-01 | Gp4 | g.chr12:6884591G>A   | Missense Mutation | LAG3      | p.D312N  | lymphocyte-activation g   | 40 (0.00)  | 17 (0.88)  | 2.35 |
| 12-01 | Gp4 | g.chr18:21427476G>T  | Missense Mutation | LAMA3     | p.R1327L | laminin, alpha 3          | 60 (0.00)  | 18 (0.28)  | 0.74 |
| 12-01 | Gp4 | g.chr18:21464765G>T  | Nonsense Mutation | LAMA3     | p.G1751* | laminin, alpha 3          | 64 (0.00)  | 155 (0.41) | 1.08 |
| 12-01 | Gp4 | g.chr20:60888053C>G  | Missense Mutation | LAMA5     | p.C2990S | laminin, alpha 5          | 20 (0.00)  | 16 (0.94)  | 2.50 |
| 12-01 | Gp4 | g.chr20:60902686C>A  | Missense Mutation | LAMA5     | p.G1613W | laminin, alpha 5          | 64 (0.00)  | 42 (0.38)  | 1.02 |
| 12-01 | Gp4 | g.chr7:107605018C>A  | Silent            | LAMB1     | p.A559A  | laminin, beta 1           | 226 (0.00) | 66 (0.53)  | 1.41 |
| 12-01 | Gp4 | g.chr7:107605071C>A  | Nonsense Mutation | LAMB1     | p.E542*  | laminin, beta 1           | 174 (0.00) | 50 (0.38)  | 1.01 |
| 12-01 | Gp4 | g.chr3:49169089C>A   | Missense Mutation | LAMB2     | p.R176L  | laminin, beta 2 (laminin  | 55 (0.00)  | 125 (0.22) | 0.58 |
| 12-01 | Gp4 | g.chr9:133911586C>A  | Silent            | LAMC3     | p.G281G  | laminin, gamma 3          | 40 (0.00)  | 43 (0.63)  | 1.67 |
| 12-01 | Gp4 | g.chr16:28997042G>T  | Missense Mutation | LAT       | p.D73Y   | linker for activation of  | 157 (0.00) | 88 (0.55)  | 1.45 |
| 12-01 | Gp4 | g.chr2:30546398C>T   | Missense Mutation | LBH       | p.P48L   | limb bud and heart deve   | 202 (0.00) | 42 (0.31)  | 0.83 |
| 12-01 | Gp4 | g.chr16:67973905G>T  | Missense Mutation | LCAT      | p.L409M  | lecithin-cholesterol acyl | 163 (0.00) | 157 (0.15) | 0.39 |
| 12-01 | Gp4 | g.chr9:139640340A>G  | Missense Mutation | LCN6      | p.M76T   | lipocalin 6               | 40 (0.00)  | 46 (0.22)  | 0.58 |
| 12-01 | Gp4 | g.chr2:136594327G>T  | Missense Mutation | LCT       | p.A138D  | lactase                   | 64 (0.00)  | 29 (0.62)  | 1.66 |
| 12-01 | Gp4 | g.chr15:66853625T>C  | Missense Mutation | LCTL      | p.Q170R  | lactase-like              | 254 (0.00) | 21 (0.24)  | 0.63 |
| 12-01 | Gp4 | g.chr4:1817448C>G    | Silent            | LETM1     | p.L671L  | leucine zipper-EF-hand    | 31 (0.00)  | 146 (0.90) | 2.39 |
| 12-01 | Gp4 | g.chr7:103969564G>T  | Missense Mutation | LHFPL3    | p.G99C   | lipoma HMGIC fusion p     | 221 (0.00) | 252 (0.29) | 0.78 |
| 12-01 | Gp4 | g.chr9:124971908G>T  | Silent            | LHX6      | p.S381S  | LIM homeobox 6            | 104 (0.00) | 49 (0.55)  | 1.47 |
| 12-01 | Gp4 | g.chr19:55220820G>T  | RNA               | LILRP2    |          | leukocyte immunoglobul    | 45 (0.00)  | 75 (0.27)  | 0.71 |
| 12-01 | Gp4 | g.chr4:41648511A>T   | Missense Mutation | LIMCH1    | p.R263S  | LIM and calponin homo     | 107 (0.00) | 28 (0.96)  | 2.57 |
| 12-01 | Gp4 | g.chr7:73511451C>A   | Nonsense Mutation | LIMK1     | p.C141*  | LIM domain kinase 1       | 21 (0.00)  | 147 (0.15) | 0.40 |
| 12-01 | Gp4 | g.chr7:73526308C>A   | Missense Mutation | LIMK1     | p.H494N  | LIM domain kinase 1       | 44 (0.00)  | 19 (0.63)  | 1.68 |
| 12-01 | Gp4 | g.chr9:136893736G>C  | RNA               | LINC00094 |          | long intergenic non-prot  | 37 (0.00)  | 40 (0.35)  | 0.93 |
| 12-01 | Gp4 | g.chr12:116972554G>A | RNA               | LINC00173 |          | long intergenic non-prot  | 124 (0.01) | 46 (0.39)  | 1.04 |
| 12-01 | Gp4 | g.chr21:46713421G>T  | lincRNA           | LINC00205 |          | long intergenic non-prot  | 30 (0.00)  | 88 (0.77)  | 2.06 |
| 12-01 | Gp4 | g.chr13:51660161G>T  | lincRNA           | LINC00371 |          | long intergenic non-prot  | 31 (0.00)  | 39 (0.38)  | 1.03 |
| 12-01 | Gp4 | g.chr13:51660307G>T  | lincRNA           | LINC00371 |          | long intergenic non-prot  | 38 (0.00)  | 30 (0.33)  | 0.89 |
| 12-01 | Gp4 | g.chr14:101138472G>T | lincRNA           | LINC00523 |          | long intergenic non-prot  | 79 (0.00)  | 135 (0.52) | 1.38 |
| 12-01 | Gp4 | g.chr14:48238932A>G  | lincRNA           | LINC00648 |          | long intergenic non-prot  | 27 (0.00)  | 23 (0.22)  | 0.58 |
| 12-01 | Gp4 | g.chr3:106824178C>T  | lincRNA           | LINC00882 |          | long intergenic non-prot  | 68 (0.00)  | 75 (0.83)  | 2.20 |
| 12-01 | Gp4 | g.chr22:48025157C>T  | lincRNA           | LINC00898 |          | long intergenic non-prot  | 33 (0.00)  | 114 (0.79) | 2.11 |
| 12-01 | Gp4 | g.chr15:80588214G>T  | lincRNA           | LINC00927 |          | long intergenic non-prot  | 22 (0.00)  | 18 (0.39)  | 1.04 |
| 12-01 | Gp4 | g.chr1:156104716G>A  | Missense Mutation | LMNA      | p.D254N  | lamin A/C                 | 95 (0.00)  | 350 (0.47) | 1.26 |

|       |     |                      |                   |           |          |                             |            |            |      |
|-------|-----|----------------------|-------------------|-----------|----------|-----------------------------|------------|------------|------|
| 12-01 | Gp4 | g.chr7:97822238G>A   | Missense Mutation | LMTK2     | p.E821K  | lemur tyrosine kinase 2     | 41 (0.00)  | 68 (0.25)  | 0.67 |
| 12-01 | Gp4 | g.chr18:44063569C>T  | Missense Mutation | LOXHD1    | p.E997K  | lipoxygenase homology       | 239 (0.00) | 29 (0.24)  | 0.64 |
| 12-01 | Gp4 | g.chr18:44109173T>C  | Silent            | LOXHD1    | p.S388S  | lipoxygenase homology       | 209 (0.00) | 223 (0.19) | 0.50 |
| 12-01 | Gp4 | g.chr15:74235209G>T  | Missense Mutation | LOXL1     | p.V373F  | lysyl oxidase-like 1        | 382 (0.00) | 197 (0.59) | 1.58 |
| 12-01 | Gp4 | g.chr8:23186055G>T   | Silent            | LOXL2     | p.G330G  | lysyl oxidase-like 2        | 150 (0.00) | 28 (0.36)  | 0.95 |
| 12-01 | Gp4 | g.chr19:14266250A>G  | Missense Mutation | LPHN1     | p.V1077A | latrophilin 1               | 59 (0.00)  | 33 (0.36)  | 0.97 |
| 12-01 | Gp4 | g.chr18:2920423C>A   | Silent            | LPIN2     | p.L853L  | lipin 2                     | 43 (0.00)  | 39 (0.15)  | 0.41 |
| 12-01 | Gp4 | g.chr20:39974517C>A  | Missense Mutation | LPIN3     | p.A25D   | lipin 3                     | 122 (0.01) | 93 (0.24)  | 0.63 |
| 12-01 | Gp4 | g.chr4:151236723A>T  | Missense Mutation | LRBA      | p.D2561E | LPS-responsive vesicle      | 35 (0.00)  | 17 (0.41)  | 1.10 |
| 12-01 | Gp4 | g.chr19:36430821A>T  | Missense Mutation | LRFN3     | p.Y165F  | leucine rich repeat and f44 | 44 (0.00)  | 39 (0.15)  | 0.41 |
| 12-01 | Gp4 | g.chr10:85992155C>A  | Missense Mutation | LRIT1     | p.G467V  | leucine-rich repeat, imm56  | 56 (0.00)  | 49 (0.14)  | 0.38 |
| 12-01 | Gp4 | g.chr4:3521914A>G    | Missense Mutation | LRPAP1    | p.L119S  | low density lipoprotein     | 189 (0.00) | 41 (0.98)  | 2.60 |
| 12-01 | Gp4 | g.chr8:145745638G>C  | Missense Mutation | LRRC14    | p.V116L  | leucine rich repeat conta   | 224 (0.00) | 343 (0.40) | 1.06 |
| 12-01 | Gp4 | g.chr8:145745872C>T  | Missense Mutation | LRRC14    | p.R194W  | leucine rich repeat conta   | 25 (0.00)  | 112 (0.19) | 0.50 |
| 12-01 | Gp4 | g.chr3:194080696G>T  | Missense Mutation | LRRC15    | p.N359K  | leucine rich repeat conta   | 93 (0.00)  | 153 (0.14) | 0.38 |
| 12-01 | Gp4 | g.chr10:134165126C>A | Silent            | LRRC27    | p.S314S  | leucine rich repeat conta   | 203 (0.00) | 230 (0.17) | 0.45 |
| 12-01 | Gp4 | g.chr21:45876542C>A  | Silent            | LRRC3     | p.R5R    | leucine rich repeat conta   | 29 (0.00)  | 46 (0.24)  | 0.64 |
| 12-01 | Gp4 | g.chr21:45876658G>T  | Missense Mutation | LRRC3     | p.G44V   | leucine rich repeat conta   | 16 (0.00)  | 39 (0.15)  | 0.41 |
| 12-01 | Gp4 | g.chr18:29304956C>A  | RNA               | LRRC37A7P |          | leucine rich repeat conta   | 16 (0.00)  | 11 (0.55)  | 1.45 |
| 12-01 | Gp4 | g.chr17:45913795C>G  | Missense Mutation | LRRC46    | p.S183R  | leucine rich repeat conta   | 76 (0.01)  | 114 (0.47) | 1.26 |
| 12-01 | Gp4 | g.chr7:150034430C>A  | Silent            | LRRC61    | p.I160I  | leucine rich repeat conta   | 113 (0.00) | 183 (0.32) | 0.85 |
| 12-01 | Gp4 | g.chr9:131670277C>A  | Silent            | LRRC8A    | p.I278I  | leucine rich repeat conta   | 238 (0.00) | 126 (0.21) | 0.57 |
| 12-01 | Gp4 | g.chr19:7963706G>A   | Missense Mutation | LRRC8E    | p.S100N  | leucine rich repeat conta   | 160 (0.00) | 42 (0.19)  | 0.51 |
| 12-01 | Gp4 | g.chr3:169539907G>A  | Silent            | LRRIQ4    | p.E66E   | leucine-rich repeats and    | 312 (0.00) | 60 (0.52)  | 1.38 |
| 12-01 | Gp4 | g.chr15:101523787C>A | Missense Mutation | LRRK1     | p.L106I  | leucine-rich repeat kinas   | 215 (0.00) | 34 (0.82)  | 2.20 |
| 12-01 | Gp4 | g.chr1:204587243C>G  | Silent            | LRRN2     | p.G626G  | leucine rich repeat neur    | 47 (0.00)  | 104 (0.15) | 0.41 |
| 12-01 | Gp4 | g.chr1:204588896G>T  | Silent            | LRRN2     | p.L75L   | leucine rich repeat neur    | 126 (0.00) | 207 (0.21) | 0.57 |
| 12-01 | Gp4 | g.chr10:68687910C>A  | Silent            | LRRTM3    | p.A412A  | leucine rich repeat trans   | 167 (0.00) | 41 (0.59)  | 1.56 |
| 12-01 | Gp4 | g.chr21:47615649G>T  | Silent            | LSS       | p.T586T  | lanosterol synthase (2,3-   | 114 (0.00) | 120 (0.21) | 0.56 |
| 12-01 | Gp4 | g.chr9:12775726C>A   | Missense Mutation | LURAP1L   | p.S4R    | leucine rich adaptor prot   | 91 (0.00)  | 64 (0.66)  | 1.75 |
| 12-01 | Gp4 | g.chr8:144102384G>A  | Missense Mutation | LY6E      | p.A10T   | lymphocyte antigen 6 cc     | 41 (0.00)  | 24 (0.21)  | 0.56 |
| 12-01 | Gp4 | g.chr12:69742241G>A  | Missense Mutation | LYZ       | p.G18D   | lysozyme                    | 40 (0.00)  | 18 (0.28)  | 0.74 |
| 12-01 | Gp4 | g.chr8:20110307C>A   | Nonsense Mutation | LZTS1     | p.E379*  | leucine zipper, putative    | 73 (0.00)  | 51 (0.16)  | 0.42 |
| 12-01 | Gp4 | g.chr19:35800857C>A  | Missense Mutation | MAG       | p.P438T  | myelin associated glyco     | 17 (0.00)  | 40 (0.50)  | 1.33 |
| 12-01 | Gp4 | g.chr7:77650450G>T   | Intron            | MAGI2     |          | membrane associated gu      | 262 (0.00) | 11 (0.45)  | 1.21 |

|       |     |                     |                   |        |          |                          |               |            |      |
|-------|-----|---------------------|-------------------|--------|----------|--------------------------|---------------|------------|------|
| 12-01 | Gp4 | g.chr7:77670385G>T  | Intron            | MAGI2  |          | membrane associated      | gu 69 (0.00)  | 21 (0.43)  | 1.14 |
| 12-01 | Gp4 | g.chr7:77753619A>G  | Intron            | MAGI2  |          | membrane associated      | gu 149 (0.00) | 74 (0.27)  | 0.72 |
| 12-01 | Gp4 | g.chr7:77788641C>T  | Intron            | MAGI2  |          | membrane associated      | gu 95 (0.00)  | 13 (0.46)  | 1.23 |
| 12-01 | Gp4 | g.chr7:77809383A>T  | Intron            | MAGI2  |          | membrane associated      | gu 56 (0.00)  | 20 (0.40)  | 1.07 |
| 12-01 | Gp4 | g.chr7:77817116C>T  | Intron            | MAGI2  |          | membrane associated      | gu 33 (0.00)  | 55 (0.98)  | 2.62 |
| 12-01 | Gp4 | g.chr7:77892234C>A  | Intron            | MAGI2  |          | membrane associated      | gu 39 (0.00)  | 37 (0.43)  | 1.15 |
| 12-01 | Gp4 | g.chr7:77974777C>T  | Intron            | MAGI2  |          | membrane associated      | gu 67 (0.00)  | 31 (0.19)  | 0.52 |
| 12-01 | Gp4 | g.chr7:77975855G>T  | Intron            | MAGI2  |          | membrane associated      | gu 117 (0.00) | 47 (0.96)  | 2.55 |
| 12-01 | Gp4 | g.chr7:78019114C>A  | Intron            | MAGI2  |          | membrane associated      | gu 51 (0.00)  | 136 (0.80) | 2.14 |
| 12-01 | Gp4 | g.chr7:78096946G>A  | Intron            | MAGI2  |          | membrane associated      | gu 21 (0.00)  | 19 (0.26)  | 0.70 |
| 12-01 | Gp4 | g.chr7:78415978C>T  | Intron            | MAGI2  |          | membrane associated      | gu 340 (0.00) | 337 (0.24) | 0.64 |
| 12-01 | Gp4 | g.chr7:78442911C>A  | Intron            | MAGI2  |          | membrane associated      | gu 65 (0.00)  | 68 (0.44)  | 1.18 |
| 12-01 | Gp4 | g.chr7:78445273G>A  | Intron            | MAGI2  |          | membrane associated      | gu 41 (0.00)  | 29 (0.76)  | 2.02 |
| 12-01 | Gp4 | g.chr7:78528899G>T  | Intron            | MAGI2  |          | membrane associated      | gu 49 (0.00)  | 45 (0.96)  | 2.55 |
| 12-01 | Gp4 | g.chr7:78532811G>T  | Intron            | MAGI2  |          | membrane associated      | gu 68 (0.00)  | 12 (0.58)  | 1.56 |
| 12-01 | Gp4 | g.chr7:78619915T>C  | Intron            | MAGI2  |          | membrane associated      | gu 37 (0.00)  | 135 (0.19) | 0.49 |
| 12-01 | Gp4 | g.chr7:78706544C>A  | Intron            | MAGI2  |          | membrane associated      | gu 259 (0.00) | 190 (0.17) | 0.45 |
| 12-01 | Gp4 | g.chr7:78804326C>T  | Intron            | MAGI2  |          | membrane associated      | gu 20 (0.00)  | 40 (0.28)  | 0.73 |
| 12-01 | Gp4 | g.chr7:78847167T>A  | Intron            | MAGI2  |          | membrane associated      | gu 33 (0.00)  | 39 (0.36)  | 0.96 |
| 12-01 | Gp4 | g.chr7:78852152G>A  | Intron            | MAGI2  |          | membrane associated      | gu 33 (0.00)  | 13 (0.38)  | 1.03 |
| 12-01 | Gp4 | g.chr7:78884244C>G  | Intron            | MAGI2  |          | membrane associated      | gu 21 (0.00)  | 80 (0.49)  | 1.30 |
| 12-01 | Gp4 | g.chr7:78884275C>T  | Intron            | MAGI2  |          | membrane associated      | gu 22 (0.00)  | 88 (0.36)  | 0.97 |
| 12-01 | Gp4 | g.chr7:78910719G>A  | Intron            | MAGI2  |          | membrane associated      | gu 24 (0.00)  | 21 (0.90)  | 2.41 |
| 12-01 | Gp4 | g.chr7:78940079G>A  | Intron            | MAGI2  |          | membrane associated      | gu 28 (0.00)  | 45 (0.98)  | 2.61 |
| 12-01 | Gp4 | g.chr7:78951047G>T  | Intron            | MAGI2  |          | membrane associated      | gu 69 (0.00)  | 16 (0.31)  | 0.83 |
| 12-01 | Gp4 | g.chr7:78967307G>A  | Intron            | MAGI2  |          | membrane associated      | gu 46 (0.00)  | 75 (0.88)  | 2.35 |
| 12-01 | Gp4 | g.chr7:78983836G>C  | Intron            | MAGI2  |          | membrane associated      | gu 386 (0.00) | 41 (0.39)  | 1.04 |
| 12-01 | Gp4 | g.chr4:141074103C>A | Missense Mutation | MAML3  | p.A127S  | mastermind-like 3 (Dros  | 45 (0.00)     | 141 (0.38) | 1.00 |
| 12-01 | Gp4 | g.chr9:140001711G>T | Missense Mutation | MAN1B1 | p.V526L  | mannosidase, alpha, cla  | 27 (0.00)     | 86 (0.19)  | 0.50 |
| 12-01 | Gp4 | g.chr15:43821153G>T | Silent            | MAP1A  | p.V2732V | microtubule-associated   | 192 (0.00)    | 209 (0.17) | 0.46 |
| 12-01 | Gp4 | g.chr15:43821264C>A | Silent            | MAP1A  | p.L2769L | microtubule-associated   | 153 (0.00)    | 190 (0.19) | 0.52 |
| 12-01 | Gp4 | g.chr5:71496153C>A  | Missense Mutation | MAP1B  | p.A2324D | microtubule-associated   | 1302 (0.00)   | 26 (0.19)  | 0.51 |
| 12-01 | Gp4 | g.chr1:27684746G>T  | Nonsense Mutation | MAP3K6 | p.C947*  | mitogen-activated protei | 67 (0.01)     | 25 (0.40)  | 1.07 |
| 12-01 | Gp4 | g.chr1:27689968A>G  | Silent            | MAP3K6 | p.H312H  | mitogen-activated protei | 40 (0.00)     | 30 (0.70)  | 1.87 |
| 12-01 | Gp4 | g.chr14:71209168G>T | Missense Mutation | MAP3K9 | p.H183Q  | mitogen-activated protei | 48 (0.00)     | 16 (0.44)  | 1.17 |

|       |     |                     |                   |          |          |                                                     |            |      |
|-------|-----|---------------------|-------------------|----------|----------|-----------------------------------------------------|------------|------|
| 12-01 | Gp4 | g.chr4:156289900C>A | Missense Mutation | MAP9     | p.L182F  | microtubule-associated p47 (0.00)                   | 49 (0.53)  | 1.41 |
| 12-01 | Gp4 | g.chr22:50703775C>A | Missense Mutation | MAPK11   | p.K330N  | mitogen-activated protein kinase 142 (0.00)         | 35 (0.34)  | 0.91 |
| 12-01 | Gp4 | g.chr8:144801075G>A | Splice Site       | MAPK15   | p.K139K  | mitogen-activated protein kinase 28 (0.00)          | 78 (0.14)  | 0.38 |
| 12-01 | Gp4 | g.chr16:30129005A>G | Missense Mutation | MAPK3    | p.L186P  | mitogen-activated protein kinase 165 (0.00)         | 46 (0.20)  | 0.52 |
| 12-01 | Gp4 | g.chr15:42111838A>G | Missense Mutation | MAPKBP1  | p.E824G  | mitogen-activated protein kinase 154 (0.00)         | 136 (0.29) | 0.76 |
| 12-01 | Gp4 | g.chr15:42116236G>T | Missense Mutation | MAPKBP1  | p.G1397V | mitogen-activated protein kinase 61 (0.00)          | 161 (0.24) | 0.63 |
| 12-01 | Gp4 | g.chr5:126250730T>A | Silent            | MARCH3   | p.T95T   | membrane-associated ribonuclease 92 (0.00)          | 80 (0.79)  | 2.10 |
| 12-01 | Gp4 | g.chr16:71674893G>T | Missense Mutation | MARVELD3 | p.S399I  | MARVEL domain containing 52 (0.00)                  | 149 (0.36) | 0.95 |
| 12-01 | Gp4 | g.chr1:11103042C>A  | Missense Mutation | MASP2    | p.G260V  | mannan-binding lectin superfamily 100 (0.00)        | 97 (0.14)  | 0.38 |
| 12-01 | Gp4 | g.chr1:46497205C>A  | Missense Mutation | MAST2    | p.N1045K | microtubule associated protein 34 (0.00)            | 89 (0.45)  | 1.20 |
| 12-01 | Gp4 | g.chr5:66459228C>A  | Silent            | MAST4    | p.S1407S | microtubule associated protein 143 (0.00)           | 162 (0.28) | 0.74 |
| 12-01 | Gp4 | g.chr22:36007029C>A | Missense Mutation | MB       | p.G74C   | myoglobin 141 (0.00)                                | 179 (0.92) | 2.44 |
| 12-01 | Gp4 | g.chr12:57919388G>T | Missense Mutation | MBD6     | p.A213S  | methyl-CpG binding domain 74 (0.00)                 | 17 (0.35)  | 0.94 |
| 12-01 | Gp4 | g.chr5:112399775G>T | Missense Mutation | MCC      | p.L707I  | mutated in colorectal carcinoma 80 (0.00)           | 12 (0.58)  | 1.56 |
| 12-01 | Gp4 | g.chr6:90384229C>A  | Missense Mutation | MDN1     | p.D4281Y | MDN1, midasin homolog 97 (0.00)                     | 65 (0.60)  | 1.60 |
| 12-01 | Gp4 | g.chr6:90405690C>A  | Missense Mutation | MDN1     | p.Q3135H | MDN1, midasin homolog 132 (0.00)                    | 23 (0.61)  | 1.62 |
| 12-01 | Gp4 | g.chr11:86267666G>T | Missense Mutation | ME3      | p.F132L  | malic enzyme 3, NADP-dependent 112 (0.00)           | 76 (0.34)  | 0.91 |
| 12-01 | Gp4 | g.chrX:70350046C>T  | Silent            | MED12    | p.R1343R | mediator complex subunit 26 (0.00)                  | 21 (0.33)  | 0.56 |
| 12-01 | Gp4 | g.chrX:70357789C>A  | Missense Mutation | MED12    | p.Q2014K | mediator complex subunit 64 (0.00)                  | 31 (0.42)  | 0.70 |
| 12-01 | Gp4 | g.chr17:60040210G>T | Missense Mutation | MED13    | p.T1656N | mediator complex subunit 107 (0.00)                 | 216 (0.45) | 1.21 |
| 12-01 | Gp4 | g.chr19:39882130C>A | Missense Mutation | MED29    | p.A44D   | mediator complex subunit 24 (0.00)                  | 34 (0.47)  | 1.25 |
| 12-01 | Gp4 | g.chr15:66206204G>A | Missense Mutation | MEGF11   | p.L861F  | multiple EGF-like domain 96 (0.00)                  | 12 (0.42)  | 1.11 |
| 12-01 | Gp4 | g.chr1:3428184G>A   | Silent            | MEGF6    | p.H348H  | multiple EGF-like domain 32 (0.00)                  | 24 (0.88)  | 2.33 |
| 12-01 | Gp4 | g.chr9:123421791C>T | Missense Mutation | MEGF9    | p.G222R  | multiple EGF-like domain 32 (0.00)                  | 62 (0.53)  | 1.42 |
| 12-01 | Gp4 | g.chr22:42180628C>A | Missense Mutation | MEI1     | p.F1062L | meiosis inhibitor 1 101 (0.00)                      | 82 (0.15)  | 0.39 |
| 12-01 | Gp4 | g.chr22:42190390C>A | Missense Mutation | MEI1     | p.S1148Y | meiosis inhibitor 1 191 (0.00)                      | 119 (0.24) | 0.63 |
| 12-01 | Gp4 | g.chr9:36589578C>A  | Missense Mutation | MELK     | p.L64M   | maternal embryonic leucine zipper kinase 197 (0.00) | 134 (0.62) | 1.65 |
| 12-01 | Gp4 | g.chr7:100028414C>G | Missense Mutation | MEPCE    | p.T258S  | methylphosphate capping protein 49 (0.00)           | 39 (0.62)  | 1.64 |
| 12-01 | Gp4 | g.chr1:171759624C>T | Nonsense Mutation | METTTL13 | p.Q448*  | methyltransferase like 1 47 (0.00)                  | 23 (0.43)  | 1.16 |
| 12-01 | Gp4 | g.chr14:21458389G>A | Splice Site       | METTTL17 | p.A26T   | methyltransferase like 1 59 (0.02)                  | 148 (0.59) | 1.59 |
| 12-01 | Gp4 | g.chr16:8738489G>T  | Silent            | METTTL22 | p.L362L  | methyltransferase like 2 332 (0.00)                 | 214 (0.24) | 0.65 |
| 12-01 | Gp4 | g.chr15:82336281C>T | Silent            | MEX3B    | p.A310A  | mex-3 RNA binding factor 87 (0.01)                  | 149 (0.38) | 1.02 |
| 12-01 | Gp4 | g.chr15:89448988C>T | Splice Site       | MFGE8    | p.G229R  | milk fat globule-EGF factor 60 (0.00)               | 156 (0.27) | 0.72 |
| 12-01 | Gp4 | g.chr8:8749293G>A   | Missense Mutation | MFHAS1   | p.R426C  | malignant fibrous histiocytoma 91 (0.00)            | 70 (0.14)  | 0.38 |
| 12-01 | Gp4 | g.chr1:12069657C>G  | Missense Mutation | MFN2     | p.S693C  | mitofusin 2 155 (0.00)                              | 142 (0.43) | 1.15 |

|       |     |                      |                   |          |          |                                            |            |      |
|-------|-----|----------------------|-------------------|----------|----------|--------------------------------------------|------------|------|
| 12-01 | Gp4 | g.chr22:37876276C>A  | Missense Mutation | MFNG     | p.K122N  | MFNG O-fucosylpeptid 54 (0.00)             | 17 (0.76)  | 2.04 |
| 12-01 | Gp4 | g.chr16:4731577C>A   | Nonsense Mutation | MGRN1    | p.Y386*  | mahogunin ring finger 126 (0.00)           | 19 (0.53)  | 1.40 |
| 12-01 | Gp4 | g.chr11:62346066G>T  | Nonsense Mutation | MIR3654  | p.S376*  | microRNA 3654 66 (0.00)                    | 22 (0.36)  | 0.97 |
| 12-01 | Gp4 | g.chr14:45687505G>A  | Missense Mutation | MIS18BP1 | p.A941V  | MIS18 binding protein 161 (0.00)           | 26 (0.96)  | 2.56 |
| 12-01 | Gp4 | g.chr22:40820231G>T  | Silent            | MKL1     | p.A152A  | megakaryoblastic leukemia 70 (0.00)        | 308 (0.32) | 0.87 |
| 12-01 | Gp4 | g.chr19:2039759C>G   | Missense Mutation | MKNK2    | p.E417D  | MAP kinase interacting 28 (0.00)           | 60 (0.58)  | 1.56 |
| 12-01 | Gp4 | g.chr19:2041144G>T   | Silent            | MKNK2    | p.A335A  | MAP kinase interacting 136 (0.00)          | 241 (0.23) | 0.62 |
| 12-01 | Gp4 | g.chr22:50523163G>A  | Silent            | MLC1     | p.L57L   | megalencephalic leukoencephaly 139 (0.01)  | 110 (0.18) | 0.48 |
| 12-01 | Gp4 | g.chr19:6270703C>A   | Missense Mutation | MLLT1    | p.G27V   | myeloid/lymphoid or myeloid 32 (0.00)      | 53 (0.62)  | 1.66 |
| 12-01 | Gp4 | g.chr10:21962675G>T  | Missense Mutation | MLLT10   | p.G483V  | myeloid/lymphoid or myeloid 200 (0.00)     | 57 (0.93)  | 2.48 |
| 12-01 | Gp4 | g.chr6:168315850G>T  | Missense Mutation | MLLT4    | p.D761Y  | myeloid/lymphoid or myeloid 202 (0.00)     | 57 (0.40)  | 1.08 |
| 12-01 | Gp4 | g.chr6:168352666C>A  | Missense Mutation | MLLT4    | p.S1537R | myeloid/lymphoid or myeloid 124 (0.00)     | 83 (0.20)  | 0.55 |
| 12-01 | Gp4 | g.chr17:36872641C>G  | Missense Mutation | MLLT6    | p.P353R  | myeloid/lymphoid or myeloid 68 (0.00)      | 213 (0.24) | 0.65 |
| 12-01 | Gp4 | g.chr16:2258510C>A   | Missense Mutation | MLST8    | p.S253Y  | MTOR associated protein 59 (0.00)          | 146 (0.45) | 1.21 |
| 12-01 | Gp4 | g.chr12:132334465C>A | Missense Mutation | MMP17    | p.D441E  | matrix metalloproteinase 107 (0.00)        | 172 (0.15) | 0.39 |
| 12-01 | Gp4 | g.chr12:56234665G>T  | Splice Site       | MMP19    | p.G102G  | matrix metalloproteinase 92 (0.00)         | 240 (0.32) | 0.86 |
| 12-01 | Gp4 | g.chr18:33831177G>A  | Missense Mutation | MOCOS    | p.G699S  | molybdenum cofactor synthase 65 (0.00)     | 15 (0.93)  | 2.49 |
| 12-01 | Gp4 | g.chr2:74688686C>A   | Nonsense Mutation | MOGS     | p.E744*  | mannosyl-oligosaccharinase 224 (0.00)      | 374 (0.17) | 0.46 |
| 12-01 | Gp4 | g.chr22:31328363G>T  | Missense Mutation | MORC2    | p.L942I  | MORC family CW-type 70 (0.00)              | 116 (0.34) | 0.90 |
| 12-01 | Gp4 | g.chr22:31328421G>A  | Silent            | MORC2    | p.F922F  | MORC family CW-type 62 (0.00)              | 148 (0.47) | 1.24 |
| 12-01 | Gp4 | g.chr22:31330954C>A  | Missense Mutation | MORC2    | p.Q669H  | MORC family CW-type 124 (0.00)             | 349 (0.36) | 0.96 |
| 12-01 | Gp4 | g.chr8:57026131G>T   | Silent            | MOS      | p.I137I  | v-mos Moloney murine 138 (0.00)            | 36 (0.28)  | 0.74 |
| 12-01 | Gp4 | g.chr7:100210848G>C  | Silent            | MOSPD3   | p.V79V   | motile sperm domain containing 225 (0.00)  | 179 (0.22) | 0.60 |
| 12-01 | Gp4 | g.chr22:50584204C>G  | Missense Mutation | MOV10L1  | p.C864W  | Mov10 RISC complex F307 (0.00)             | 438 (0.18) | 0.47 |
| 12-01 | Gp4 | g.chr16:135469G>A    | Missense Mutation | MPG      | p.R197H  | N-methylpurine-DNA glycosylase 159 (0.00)  | 128 (0.27) | 0.71 |
| 12-01 | Gp4 | g.chr15:75189994G>T  | Missense Mutation | MPI      | p.G399W  | mannose phosphate isomerase 167 (0.01)     | 36 (0.47)  | 1.26 |
| 12-01 | Gp4 | g.chr19:4358087C>A   | Missense Mutation | MPND     | p.P365H  | MPN domain containing 61 (0.00)            | 52 (0.31)  | 0.82 |
| 12-01 | Gp4 | g.chr19:4359253G>T   | Splice Site       | MPND     |          | MPN domain containing 60 (0.00)            | 69 (0.29)  | 0.77 |
| 12-01 | Gp4 | g.chr17:41956762C>A  | Missense Mutation | MPP2     | p.V472L  | membrane protein, palmitoylated 104 (0.00) | 50 (0.76)  | 0.63 |
| 12-01 | Gp4 | g.chr1:161276204C>T  | Missense Mutation | MPZ      | p.G167R  | myelin protein zero 71 (0.00)              | 61 (0.23)  | 0.61 |
| 12-01 | Gp4 | g.chr11:118122982G>T | Missense Mutation | MPZL3    | p.R10S   | myelin protein zero-like 122 (0.01)        | 258 (0.19) | 0.52 |
| 12-01 | Gp4 | g.chr17:60757223C>A  | Missense Mutation | MRC2     | p.P753H  | mannose receptor, C type 71 (0.00)         | 75 (0.35)  | 0.92 |
| 12-01 | Gp4 | g.chr2:216810376C>G  | Missense Mutation | MREG     | p.R143P  | melanoregulin 85 (0.00)                    | 18 (0.28)  | 0.74 |
| 12-01 | Gp4 | g.chr11:18955730C>A  | Missense Mutation | MRGPRX1  | p.R201M  | MAS-related GPR, member 89 (0.01)          | 18 (0.39)  | 1.04 |
| 12-01 | Gp4 | g.chr8:142444091G>T  | RNA               | MROH5    |          | maestro heat-like repeat 25 (0.00)         | 83 (0.71)  | 1.90 |



|       |     |                     |                   |        |          |                          |            |            |      |
|-------|-----|---------------------|-------------------|--------|----------|--------------------------|------------|------------|------|
| 12-01 | Gp4 | g.chr1:17083969C>A  | RNA               | MST1L  |          | macrophage stimulating   | 98 (0.00)  | 36 (0.17)  | 0.44 |
| 12-01 | Gp4 | g.chr1:17084158G>T  | RNA               | MST1L  |          | macrophage stimulating   | 174 (0.00) | 97 (0.72)  | 1.92 |
| 12-01 | Gp4 | g.chr3:49936678T>C  | Missense Mutation | MST1R  | p.S417G  | macrophage stimulating   | 35 (0.00)  | 30 (0.53)  | 1.42 |
| 12-01 | Gp4 | g.chr1:155582305G>T | Missense Mutation | MSTO1  | p.G304W  | misato 1, mitochondrial  | 88 (0.00)  | 75 (0.56)  | 1.49 |
| 12-01 | Gp4 | g.chr1:155717686G>C | Missense Mutation | MSTO1  | p.G298A  | misato 1, mitochondrial  | 98 (0.00)  | 56 (0.54)  | 1.43 |
| 12-01 | Gp4 | g.chr1:26153144G>T  | Missense Mutation | MTFR1L | p.S93I   | mitochondrial fission re | 239 (0.00) | 194 (0.45) | 1.21 |
| 12-01 | Gp4 | g.chr5:7897191C>T   | Missense Mutation | MTRR   | p.H595Y  | 5-methyltetrahydrofolat  | 43 (0.00)  | 26 (0.77)  | 2.05 |
| 12-01 | Gp4 | g.chr13:29599481C>A | Missense Mutation | MTUS2  | p.P226T  | microtubule associated t | 31 (0.00)  | 70 (0.27)  | 0.72 |
| 12-01 | Gp4 | g.chr7:100683715C>A | Silent            | MUC17  | p.T3006T | mucin 17, cell surface a | 147 (0.00) | 120 (0.47) | 1.27 |
| 12-01 | Gp4 | g.chr11:1082692G>T  | Missense Mutation | MUC2   | p.W647C  | mucin 2, oligomeric mu   | 27 (0.00)  | 49 (0.31)  | 0.82 |
| 12-01 | Gp4 | g.chr11:1090342G>T  | Missense Mutation | MUC2   | p.C1213F | mucin 2, oligomeric mu   | 34 (0.00)  | 19 (0.47)  | 1.26 |
| 12-01 | Gp4 | g.chr11:1093761G>T  | Missense Mutation | MUC2   | p.Q1860H | mucin 2, oligomeric mu   | 58 (0.00)  | 138 (0.48) | 1.28 |
| 12-01 | Gp4 | g.chr11:1268151G>T  | Silent            | MUC5B  | p.V3347V | mucin 5B, oligomeric m   | 179 (0.00) | 183 (0.42) | 1.12 |
| 12-01 | Gp4 | g.chr11:1269656C>A  | Missense Mutation | MUC5B  | p.S3849Y | mucin 5B, oligomeric m   | 255 (0.00) | 280 (0.23) | 0.61 |
| 12-01 | Gp4 | g.chr21:42749082G>A | Splice Site       | MX2    | p.M83I   | MX dynamin-like GTPa     | 159 (0.00) | 58 (0.33)  | 0.87 |
| 12-01 | Gp4 | g.chrX:3228421G>T   | Nonsense Mutation | MXRA5  | p.S2608* | matrix-remodelling asso  | 35 (0.00)  | 28 (0.93)  | 1.55 |
| 12-01 | Gp4 | g.chr20:42320949C>T | Missense Mutation | MYBL2  | p.T218M  | v-myb avian myeloblast   | 41 (0.02)  | 16 (0.38)  | 1.00 |
| 12-01 | Gp4 | g.chr12:81110968C>A | Missense Mutation | MYF5   | p.H42Q   | myogenic factor 5        | 36 (0.00)  | 75 (0.20)  | 0.53 |
| 12-01 | Gp4 | g.chr16:15851755C>A | Nonsense Mutation | MYH11  | p.E502*  | myosin, heavy chain 11,  | 75 (0.00)  | 138 (0.37) | 0.99 |
| 12-01 | Gp4 | g.chr17:10536025C>A | Missense Mutation | MYH3   | p.R1575I | myosin, heavy chain 3,   | 212 (0.00) | 132 (0.37) | 0.99 |
| 12-01 | Gp4 | g.chr17:10355767G>A | Missense Mutation | MYH4   | p.A1105V | myosin, heavy chain 4,   | 67 (0.00)  | 38 (0.74)  | 1.96 |
| 12-01 | Gp4 | g.chr6:16145171G>A  | Missense Mutation | MYLIP  | p.D291N  | myosin regulatory light  | 59 (0.00)  | 47 (0.15)  | 0.40 |
| 12-01 | Gp4 | g.chr3:123452619C>A | Missense Mutation | MYLK   | p.Q408H  | myosin light chain kinas | 118 (0.00) | 55 (0.27)  | 0.73 |
| 12-01 | Gp4 | g.chr20:30408033G>C | Missense Mutation | MYLK2  | p.D53H   | myosin light chain kinas | 161 (0.00) | 308 (0.43) | 1.13 |
| 12-01 | Gp4 | g.chr16:30387844C>A | Silent            | MYLPF  | p.L91L   | myosin light chain, phos | 65 (0.00)  | 206 (0.25) | 0.66 |
| 12-01 | Gp4 | g.chr5:16694659G>C  | Missense Mutation | MYO10  | p.F1207L | myosin X                 | 261 (0.00) | 69 (0.23)  | 0.62 |
| 12-01 | Gp4 | g.chr5:16703217T>A  | Missense Mutation | MYO10  | p.Y776F  | myosin X                 | 176 (0.00) | 47 (0.45)  | 1.19 |
| 12-01 | Gp4 | g.chr17:18045521C>A | Silent            | MYO15A | p.R1926R | myosin XVA               | 39 (0.00)  | 39 (0.15)  | 0.41 |
| 12-01 | Gp4 | g.chr17:18051389C>A | Missense Mutation | MYO15A | p.H2186N | myosin XVA               | 98 (0.00)  | 41 (0.17)  | 0.46 |
| 12-01 | Gp4 | g.chr17:18054605G>A | Splice Site       | MYO15A |          | myosin XVA               | 75 (0.00)  | 65 (0.54)  | 1.44 |
| 12-01 | Gp4 | g.chr17:18058536C>A | Silent            | MYO15A | p.A43A   | myosin XVA               | 99 (0.00)  | 145 (0.60) | 1.60 |
| 12-01 | Gp4 | g.chr17:34857010G>T | Missense Mutation | MYO19  | p.P716T  | myosin XIX               | 115 (0.00) | 72 (0.46)  | 1.22 |
| 12-01 | Gp4 | g.chr12:57431694C>A | Missense Mutation | MYO1A  | p.L640F  | myosin IA                | 117 (0.01) | 107 (0.16) | 0.42 |
| 12-01 | Gp4 | g.chr19:8616999C>A  | Missense Mutation | MYO1F  | p.G185V  | myosin IF                | 169 (0.00) | 14 (0.43)  | 1.14 |
| 12-01 | Gp4 | g.chr11:76867976T>C | Missense Mutation | MYO7A  | p.F221L  | myosin VIIA              | 111 (0.00) | 204 (0.39) | 1.05 |

|       |     |                      |                   |            |          |                                                |            |            |      |
|-------|-----|----------------------|-------------------|------------|----------|------------------------------------------------|------------|------------|------|
| 12-01 | Gp4 | g.chr19:17308649G>A  | Silent            | MYO9B      | p.P1365P | myosin IXB                                     | 98 (0.00)  | 167 (0.99) | 2.63 |
| 12-01 | Gp4 | g.chr17:12647554C>A  | Missense Mutation | MYOCD      | p.P258T  | myocardin                                      | 195 (0.00) | 136 (0.40) | 1.06 |
| 12-01 | Gp4 | g.chr1:24413144C>A   | Silent            | MYOM3      | p.R596R  | myomesin 3                                     | 78 (0.00)  | 76 (0.17)  | 0.46 |
| 12-01 | Gp4 | g.chr11:61545899G>T  | Missense Mutation | MYRF       | p.D651Y  | myelin regulatory factor 146                   | 0.00       | 26 (0.65)  | 1.74 |
| 12-01 | Gp4 | g.chr20:62837070C>T  | Missense Mutation | MYT1       | p.S105L  | myelin transcription factor 18                 | 0.00       | 22 (0.45)  | 1.21 |
| 12-01 | Gp4 | g.chr5:177546686C>G  | Silent            | N4BP3      | p.A34A   | NEDD4 binding protein 79                       | 0.00       | 95 (0.21)  | 0.56 |
| 12-01 | Gp4 | g.chr13:101714339C>A | Missense Mutation | NALCN      | p.C1579F | sodium leak channel, no 105                    | 0.00       | 137 (0.34) | 0.90 |
| 12-01 | Gp4 | g.chr17:72771825G>T  | Missense Mutation | NAT9       | p.Q5K    | N-acetyltransferase 9 (G94)                    | 0.00       | 109 (0.29) | 0.78 |
| 12-01 | Gp4 | g.chr1:201751481C>A  | Missense Mutation | NAV1       | p.T627K  | neuron navigator 1                             | 203 (0.00) | 159 (0.21) | 0.57 |
| 12-01 | Gp4 | g.chr11:19954747C>A  | Silent            | NAV2       | p.S255S  | neuron navigator 2                             | 396 (0.00) | 569 (0.18) | 0.47 |
| 12-01 | Gp4 | g.chr3:47030865G>C   | Missense Mutation | NBEAL2     | p.R156P  | neurobeachin-like 2                            | 20 (0.00)  | 15 (0.33)  | 0.89 |
| 12-01 | Gp4 | g.chr3:47040873G>T   | Missense Mutation | NBEAL2     | p.E1204D | neurobeachin-like 2                            | 74 (0.00)  | 65 (0.20)  | 0.53 |
| 12-01 | Gp4 | g.chr3:47045779C>T   | Missense Mutation | NBEAL2     | p.R2032W | neurobeachin-like 2                            | 93 (0.00)  | 115 (0.23) | 0.63 |
| 12-01 | Gp4 | g.chr1:16913567C>T   | Silent            | NBPF1      | p.Q252Q  | neuroblastoma breakpoint 174                   | 0.00       | 38 (0.16)  | 0.42 |
| 12-01 | Gp4 | g.chr7:72639991G>T   | RNA               | NCF1B      |          | neutrophil cytosolic factor 30                 | 0.00       | 73 (0.22)  | 0.58 |
| 12-01 | Gp4 | g.chr22:37263442T>C  | Missense Mutation | NCF4       | p.Y94H   | neutrophil cytosolic factor 141                | 0.00       | 20 (0.25)  | 0.67 |
| 12-01 | Gp4 | g.chr2:133539713C>A  | Missense Mutation | NCKAP5     | p.K1557N | NCK-associated protein 212                     | 0.00       | 35 (0.51)  | 1.37 |
| 12-01 | Gp4 | g.chr12:50188693C>A  | Nonsense Mutation | NCKAP5L    | p.E984*  | NCK-associated protein 24                      | 0.00       | 61 (0.18)  | 0.48 |
| 12-01 | Gp4 | g.chr2:24985575G>T   | Missense Mutation | NCOA1      | p.R1362I | nuclear receptor coactivator 321               | 0.00       | 44 (0.20)  | 0.55 |
| 12-01 | Gp4 | g.chr20:33329421G>A  | Silent            | NCOA6      | p.L1547L | nuclear receptor coactivator 116               | 0.00       | 32 (0.97)  | 2.58 |
| 12-01 | Gp4 | g.chr14:21486660C>G  | Missense Mutation | NDRG2      | p.E273Q  | NDRG family member 135                         | 0.00       | 13 (0.92)  | 2.46 |
| 12-01 | Gp4 | g.chr12:95397378A>G  | Missense Mutation | NDUFA12    | p.F27L   | NADH dehydrogenase (ubiquinone) 141            | 0.00       | 46 (0.26)  | 0.70 |
| 12-01 | Gp4 | g.chr22:42488722G>T  | RNA               | NDUFA6-AS1 |          | NDUFA6 antisense RNA 21                        | 0.05       | 24 (0.25)  | 0.67 |
| 12-01 | Gp4 | g.chr16:2011233G>T   | Missense Mutation | NDUFB10    | p.E70D   | NADH dehydrogenase (ubiquinone) 85             | 0.00       | 173 (0.18) | 0.49 |
| 12-01 | Gp4 | g.chr18:9126888C>A   | Silent            | NDUFV2     | p.I213I  | NADH dehydrogenase (ubiquinone) 41             | 0.00       | 86 (0.41)  | 1.09 |
| 12-01 | Gp4 | g.chr8:11643730C>A   | Missense Mutation | NEIL2      | p.P316Q  | nei endonuclease VIII-like 82                  | 0.00       | 88 (0.51)  | 1.36 |
| 12-01 | Gp4 | g.chr13:52673885G>T  | Silent            | NEK5       | p.A340A  | NIMA-related kinase 5                          | 120 (0.00) | 79 (0.97)  | 2.60 |
| 12-01 | Gp4 | g.chr17:7224213G>A   | Silent            | NEURL4     | p.T1130T | neuralized E3 ubiquitin ligase 162             | 0.00       | 261 (0.42) | 1.11 |
| 12-01 | Gp4 | g.chr1:204957880C>A  | Missense Mutation | NFASC      | p.Q905K  | neurofascin                                    | 91 (0.00)  | 141 (0.89) | 2.36 |
| 12-01 | Gp4 | g.chr1:204985623T>C  | Missense Mutation | NFASC      | p.S1227P | neurofascin                                    | 108 (0.00) | 76 (0.20)  | 0.53 |
| 12-01 | Gp4 | g.chr14:24845294C>A  | Missense Mutation | NFATC4     | p.F744L  | nuclear factor of activated T-cells 250        | 0.00       | 198 (0.17) | 0.46 |
| 12-01 | Gp4 | g.chr17:46135794C>A  | Silent            | NFE2L1     | p.G359G  | nuclear factor, erythroid 210                  | 0.00       | 310 (0.27) | 0.73 |
| 12-01 | Gp4 | g.chr4:47880574T>G   | Missense Mutation | NFXL1      | p.T683P  | nuclear transcription factor 34                | 0.00       | 15 (0.33)  | 0.89 |
| 12-01 | Gp4 | g.chr1:41223792G>C   | Splice Site       | NFYC       |          | nuclear transcription factor 76                | 0.00       | 22 (0.50)  | 1.33 |
| 12-01 | Gp4 | g.chr2:233750042C>A  | Missense Mutation | NGEF       | p.S370I  | neuronal guanine nucleotide exchange factor 30 | 0.00       | 46 (0.59)  | 1.57 |

|       |     |                      |                   |        |          |                                                     |            |      |
|-------|-----|----------------------|-------------------|--------|----------|-----------------------------------------------------|------------|------|
| 12-01 | Gp4 | g.chr5:177576825G>T  | Silent            | NHP2   | p.A117A  | NHP2 ribonucleoprotein 107 (0.00)                   | 129 (0.16) | 0.41 |
| 12-01 | Gp4 | g.chr20:25459597G>T  | Silent            | NINL   | p.G721G  | ninein-like 84 (0.00)                               | 92 (0.20)  | 0.52 |
| 12-01 | Gp4 | g.chr15:23052595C>T  | Splice Site       | NIPA1  | p.V160M  | non imprinted in Prader-Willi syndrome 141 (0.00)   | 74 (0.46)  | 1.46 |
| 12-01 | Gp4 | g.chr3:52522112G>T   | Silent            | NISCH  | p.V868V  | nischarin 40 (0.00)                                 | 40 (0.25)  | 0.67 |
| 12-01 | Gp4 | g.chr3:52526285C>G   | Missense Mutation | NISCH  | p.F1434L | nischarin 233 (0.00)                                | 317 (0.25) | 0.67 |
| 12-01 | Gp4 | g.chr3:42660563C>A   | Missense Mutation | NKTR   | p.S62Y   | natural killer cell trigger 19 (0.00)               | 18 (0.94)  | 2.52 |
| 12-01 | Gp4 | g.chr17:33462450C>A  | Silent            | NLE1   | p.L344L  | notchless homolog 1 (Drosophila) 23 (0.00)          | 11 (0.64)  | 1.70 |
| 12-01 | Gp4 | g.chr17:7318084G>T   | Missense Mutation | NLGN2  | p.G254V  | neurologin 2 172 (0.00)                             | 168 (0.55) | 1.46 |
| 12-01 | Gp4 | g.chr16:57060053C>G  | Missense Mutation | NLRC5  | p.R400G  | NLR family, CARD domain 131 (0.00)                  | 479 (0.31) | 0.84 |
| 12-01 | Gp4 | g.chr16:57095360G>T  | Splice Site       | NLRC5  | p.R1329S | NLR family, CARD domain 52 (0.00)                   | 36 (0.22)  | 0.59 |
| 12-01 | Gp4 | g.chr17:5436178G>T   | Missense Mutation | NLRP1  | p.A1087D | NLR family, pyrin domain 82 (0.01)                  | 58 (0.31)  | 0.83 |
| 12-01 | Gp4 | g.chr17:5436192G>T   | Silent            | NLRP1  | p.P1082P | NLR family, pyrin domain 107 (0.00)                 | 106 (0.16) | 0.43 |
| 12-01 | Gp4 | g.chr19:54314308G>T  | Missense Mutation | NLRP12 | p.P202Q  | NLR family, pyrin domain 138 (0.00)                 | 211 (0.22) | 0.58 |
| 12-01 | Gp4 | g.chr19:56370124C>A  | Silent            | NLRP4  | p.I455I  | NLR family, pyrin domain 256 (0.00)                 | 22 (0.27)  | 0.73 |
| 12-01 | Gp4 | g.chr19:56544013A>G  | Silent            | NLRP5  | p.E771E  | NLR family, pyrin domain 117 (0.01)                 | 195 (0.24) | 0.64 |
| 12-01 | Gp4 | g.chr11:284592C>G    | Silent            | NLRP6  | p.T830T  | NLR family, pyrin domain 25 (0.00)                  | 105 (0.18) | 0.48 |
| 12-01 | Gp4 | g.chr11:119053972C>A | Missense Mutation | NLRX1  | p.Q918K  | NLR family member X1101 (0.00)                      | 120 (0.24) | 0.64 |
| 12-01 | Gp4 | g.chr1:183387378C>G  | Missense Mutation | NMNAT2 | p.V9L    | nicotinamide nucleotide 40 (0.00)                   | 13 (0.92)  | 2.46 |
| 12-01 | Gp4 | g.chr2:232389866C>A  | Missense Mutation | NMUR1  | p.S390I  | neuromedin U receptor 38 (0.00)                     | 32 (0.94)  | 2.50 |
| 12-01 | Gp4 | g.chr7:30491972G>T   | Missense Mutation | NOD1   | p.P354H  | nucleotide-binding oligomerization domain 33 (0.00) | 48 (0.60)  | 1.61 |
| 12-01 | Gp4 | g.chr9:33469562C>A   | Missense Mutation | NOL6   | p.G221V  | nucleolar protein 6 (RNase B1) 50 (0.00)            | 16 (0.88)  | 2.33 |
| 12-01 | Gp4 | g.chr16:14951417C>G  | Nonsense Mutation | NOMO1  | p.Y375*  | NODAL modulator 1 291 (0.00)                        | 23 (0.96)  | 2.55 |
| 12-01 | Gp4 | g.chr16:18544427A>T  | Missense Mutation | NOMO2  | p.V432D  | NODAL modulator 2 46 (0.00)                         | 14 (0.71)  | 1.90 |
| 12-01 | Gp4 | g.chr12:117681232A>G | Silent            | NOS1   | p.C978C  | nitric oxide synthase 1 (neuronal) 70 (0.00)        | 19 (0.84)  | 2.25 |
| 12-01 | Gp4 | g.chr17:26092655G>T  | Silent            | NOS2   | p.G778G  | nitric oxide synthase 2, inducible 21 (0.00)        | 49 (0.24)  | 0.65 |
| 12-01 | Gp4 | g.chr1:120458604G>T  | Silent            | NOTCH2 | p.V2247V | notch 2 144 (0.00)                                  | 115 (0.37) | 1.00 |
| 12-01 | Gp4 | g.chr17:79910956C>A  | Missense Mutation | NOTUM  | p.G458W  | notum pectinacetyltransferase 47 (0.00)             | 91 (0.26)  | 0.70 |
| 12-01 | Gp4 | g.chr19:46457135G>T  | Missense Mutation | NOVA2  | p.A100D  | neuro-oncological ventral helix domain 213 (0.00)   | 146 (0.21) | 0.71 |
| 12-01 | Gp4 | g.chr17:45608828G>T  | Silent            | NPEPPS | p.L54L   | aminopeptidase puromycin inhibitor 21 (0.00)        | 71 (0.17)  | 0.45 |
| 12-01 | Gp4 | g.chr1:6038427G>T    | Missense Mutation | NPHP4  | p.S61Y   | nephronophthisis 4 175 (0.00)                       | 276 (0.33) | 0.87 |
| 12-01 | Gp4 | g.chr16:21848756C>A  | Missense Mutation | NPIP4  | p.D318Y  | nuclear pore complex in yeast 245 (0.00)            | 34 (0.29)  | 0.78 |
| 12-01 | Gp4 | g.chr1:153660625G>T  | Missense Mutation | NPR1   | p.R782L  | natriuretic peptide receptor 109 (0.00)             | 82 (0.16)  | 0.42 |
| 12-01 | Gp4 | g.chr9:35792515G>T   | Missense Mutation | NPR2   | p.S37I   | natriuretic peptide receptor 18 (0.00)              | 63 (0.54)  | 1.44 |
| 12-01 | Gp4 | g.chr9:35801065A>G   | Splice Site       | NPR2   |          | natriuretic peptide receptor 44 (0.00)              | 45 (0.42)  | 1.13 |
| 12-01 | Gp4 | g.chr5:32712582T>A   | Missense Mutation | NPR3   | p.Y234N  | natriuretic peptide receptor 137 (0.00)             | 21 (0.76)  | 2.03 |

|       |     |                      |                   |            |          |                            |            |            |      |
|-------|-----|----------------------|-------------------|------------|----------|----------------------------|------------|------------|------|
| 12-01 | Gp4 | g.chr3:50385646C>A   | Missense Mutation | NPRL2      | p.V281L  | nitrogen permease regul    | 181 (0.01) | 159 (0.18) | 0.49 |
| 12-01 | Gp4 | g.chr15:73889565C>A  | Missense Mutation | NPTN       | p.W79C   | neuroplastin               | 79 (0.00)  | 145 (0.70) | 1.88 |
| 12-01 | Gp4 | g.chr2:27664574G>T   | Splice Site       | NRBP1      |          | nuclear receptor binding   | 292 (0.00) | 334 (0.26) | 0.69 |
| 12-01 | Gp4 | g.chr21:16339748A>T  | Missense Mutation | NRIP1      | p.S256T  | nuclear receptor interact  | 18 (0.00)  | 29 (0.21)  | 0.55 |
| 12-01 | Gp4 | g.chr2:206656968C>A  | Missense Mutation | NRP2       | p.P812Q  | neuropilin 2               | 27 (0.00)  | 153 (0.18) | 0.49 |
| 12-01 | Gp4 | g.chr3:196388185C>A  | Missense Mutation | NRROS      | p.S557R  | negative regulator of rea  | 118 (0.00) | 31 (0.35)  | 0.95 |
| 12-01 | Gp4 | g.chr4:4411317C>A    | Silent            | NSG1       | p.L49L   |                            | 48 (0.00)  | 29 (0.62)  | 1.66 |
| 12-01 | Gp4 | g.chr4:4419140A>G    | Missense Mutation | NSG1       | p.E140G  |                            | 87 (0.00)  | 42 (0.19)  | 0.51 |
| 12-01 | Gp4 | g.chr17:73127370C>A  | Missense Mutation | NT5C       | p.V61L   | 5', 3'-nucleotidase, cytos | 32 (0.00)  | 112 (0.43) | 1.14 |
| 12-01 | Gp4 | g.chr3:52562548G>A   | Nonsense Mutation | NT5DC2     | p.Q186*  | 5'-nucleotidase domain     | 29 (0.00)  | 97 (0.58)  | 1.54 |
| 12-01 | Gp4 | g.chr2:113479424G>T  | Missense Mutation | NT5DC4     | p.G14V   | 5'-nucleotidase domain     | 64 (0.00)  | 198 (0.21) | 0.55 |
| 12-01 | Gp4 | g.chr16:2096129C>A   | Splice Site       | NTHL1      | p.K126N  | nth endonuclease III-lik   | 62 (0.00)  | 64 (0.53)  | 1.42 |
| 12-01 | Gp4 | g.chr1:156849012C>A  | Missense Mutation | NTRK1      | p.A635D  | neurotrophic tyrosine ki   | 28 (0.00)  | 12 (0.75)  | 2.00 |
| 12-01 | Gp4 | g.chr1:156849811G>T  | Silent            | NTRK1      | p.L689L  | neurotrophic tyrosine ki   | 78 (0.00)  | 358 (0.23) | 0.63 |
| 12-01 | Gp4 | g.chr9:87285722G>A   | Nonsense Mutation | NTRK2      | p.W20*   | neurotrophic tyrosine ki   | 53 (0.00)  | 79 (0.72)  | 1.92 |
| 12-01 | Gp4 | g.chr1:205290701A>T  | Missense Mutation | NUAK2      | p.L19Q   | NUAK family, SNF1-lil      | 47 (0.00)  | 39 (0.38)  | 1.03 |
| 12-01 | Gp4 | g.chr10:12209810G>T  | Splice Site       | NUDT5      | p.A184D  | nudix (nucleoside diphos   | 167 (0.00) | 139 (0.32) | 0.84 |
| 12-01 | Gp4 | g.chr4:123838775G>T  | Missense Mutation | NUDT6      | p.A108D  | nudix (nucleoside diphos   | 19 (0.00)  | 29 (0.86)  | 2.30 |
| 12-01 | Gp4 | g.chr11:71726956C>A  | Missense Mutation | NUMA1      | p.K531N  | nuclear mitotic apparatus  | 153 (0.00) | 494 (0.17) | 0.46 |
| 12-01 | Gp4 | g.chr9:131720319G>A  | Missense Mutation | NUP188     | p.A120T  | nucleoporin 188kDa         | 21 (0.00)  | 89 (0.81)  | 2.16 |
| 12-01 | Gp4 | g.chr9:131760497C>T  | Missense Mutation | NUP188     | p.T1140I | nucleoporin 188kDa         | 47 (0.00)  | 158 (0.27) | 0.71 |
| 12-01 | Gp4 | g.chr9:131760506T>C  | Splice Site       | NUP188     | p.L1143S | nucleoporin 188kDa         | 45 (0.00)  | 126 (0.17) | 0.44 |
| 12-01 | Gp4 | g.chr9:131763998G>T  | Missense Mutation | NUP188     | p.R1345L | nucleoporin 188kDa         | 42 (0.00)  | 51 (0.33)  | 0.89 |
| 12-01 | Gp4 | g.chr3:13363741G>A   | Missense Mutation | NUP210     | p.P1623S | nucleoporin 210kDa         | 114 (0.01) | 81 (0.15)  | 0.40 |
| 12-01 | Gp4 | g.chr17:73222224G>A  | Missense Mutation | NUP85      | p.D311N  | nucleoporin 85kDa          | 55 (0.00)  | 82 (0.39)  | 1.04 |
| 12-01 | Gp4 | g.chr10:88974004G>T  | RNA               | NUTM2A-AS1 |          | NUTM2A antisense RN        | 30 (0.00)  | 26 (0.77)  | 2.05 |
| 12-01 | Gp4 | g.chr10:88974038G>T  | RNA               | NUTM2A-AS1 |          | NUTM2A antisense RN        | 32 (0.00)  | 41 (0.34)  | 0.91 |
| 12-01 | Gp4 | g.chr10:88975818C>A  | RNA               | NUTM2A-AS1 |          | NUTM2A antisense RN        | 164 (0.00) | 217 (0.47) | 1.25 |
| 12-01 | Gp4 | g.chr10:89054928C>A  | RNA               | NUTM2A-AS1 |          | NUTM2A antisense RN        | 24 (0.00)  | 37 (0.46)  | 1.23 |
| 12-01 | Gp4 | g.chr17:47656251G>C  | Silent            | NXPH3      | p.L116L  | neurexophilin 3            | 58 (0.00)  | 40 (0.15)  | 0.40 |
| 12-01 | Gp4 | g.chr7:100086891G>T  | Missense Mutation | NYAP1      | p.G516V  | neuronal tyrosine-phosp    | 23 (0.00)  | 12 (0.92)  | 2.44 |
| 12-01 | Gp4 | g.chr14:24878677C>A  | Silent            | NYNRIN     | p.S559S  | NYN domain and retrov      | 79 (0.01)  | 146 (0.22) | 0.58 |
| 12-01 | Gp4 | g.chr14:24885969G>T  | Missense Mutation | NYNRIN     | p.G1672C | NYN domain and retrov      | 108 (0.01) | 119 (0.24) | 0.65 |
| 12-01 | Gp4 | g.chr12:113400583G>T | Missense Mutation | OAS3       | p.G654C  | 2'-5'-oligoadenylate syn   | 260 (0.00) | 169 (0.14) | 0.38 |
| 12-01 | Gp4 | g.chr9:136082710C>A  | Missense Mutation | OBP2B      | p.K97N   | odorant binding protein    | 73 (0.01)  | 93 (0.37)  | 0.97 |

|       |     |                      |                   |        |          |                           |            |            |      |
|-------|-----|----------------------|-------------------|--------|----------|---------------------------|------------|------------|------|
| 12-01 | Gp4 | g.chr1:228412255G>T  | Missense Mutation | OBSCN  | p.A1009S | obscurin, cytoskeletal c  | 62 (0.00)  | 19 (0.84)  | 2.25 |
| 12-01 | Gp4 | g.chr1:228432086G>T  | Missense Mutation | OBSCN  | p.A1191S | obscurin, cytoskeletal c  | 231 (0.00) | 94 (0.57)  | 1.53 |
| 12-01 | Gp4 | g.chr1:228434477C>T  | Missense Mutation | OBSCN  | p.R1428W | obscurin, cytoskeletal c  | 71 (0.00)  | 170 (0.23) | 0.61 |
| 12-01 | Gp4 | g.chr1:228505240C>A  | Missense Mutation | OBSCN  | p.P5503H | obscurin, cytoskeletal c  | 66 (0.00)  | 40 (0.82)  | 2.20 |
| 12-01 | Gp4 | g.chr1:228523972G>C  | Splice Site       | OBSCN  |          | obscurin, cytoskeletal c  | 161 (0.00) | 67 (0.39)  | 1.03 |
| 12-01 | Gp4 | g.chr1:228528908A>G  | Missense Mutation | OBSCN  | p.D6894G | obscurin, cytoskeletal c  | 22 (0.00)  | 65 (0.51)  | 1.35 |
| 12-01 | Gp4 | g.chr1:228558397G>C  | Missense Mutation | OBSCN  | p.E7685D | obscurin, cytoskeletal c  | 122 (0.00) | 247 (0.45) | 1.19 |
| 12-01 | Gp4 | g.chr8:103572768G>T  | Missense Mutation | ODF1   | p.D137Y  | outer dense fiber of sper | 273 (0.00) | 127 (0.32) | 0.86 |
| 12-01 | Gp4 | g.chr8:103572848G>T  | Silent            | ODF1   | p.S163S  | outer dense fiber of sper | 199 (0.00) | 171 (0.34) | 0.90 |
| 12-01 | Gp4 | g.chr9:131231612G>A  | Missense Mutation | ODF2   | p.V129I  | outer dense fiber of sper | 149 (0.00) | 70 (0.14)  | 0.38 |
| 12-01 | Gp4 | g.chr10:50946023G>T  | Silent            | OGDHL  | p.R829R  | oxoglutarate dehydroge    | 190 (0.00) | 380 (0.15) | 0.41 |
| 12-01 | Gp4 | g.chr9:138011703C>A  | Silent            | OLFM1  | p.V352V  | olfactomedin 1            | 57 (0.00)  | 128 (0.77) | 2.04 |
| 12-01 | Gp4 | g.chr1:114523127T>A  | Nonsense Mutation | OLFML3 | p.Y96*   | olfactomedin-like 3       | 92 (0.00)  | 44 (0.36)  | 0.97 |
| 12-01 | Gp4 | g.chr6:137815214G>C  | Missense Mutation | OLIG3  | p.H32D   | oligodendrocyte transcri  | 140 (0.00) | 260 (0.49) | 1.31 |
| 12-01 | Gp4 | g.chr14:22038403G>T  | Missense Mutation | OR10G3 | p.A158D  | olfactory receptor, famil | 205 (0.00) | 24 (0.33)  | 0.89 |
| 12-01 | Gp4 | g.chr19:15918781G>A  | Missense Mutation | OR10H1 | p.L23F   | olfactory receptor, famil | 155 (0.01) | 207 (0.17) | 0.45 |
| 12-01 | Gp4 | g.chr11:123848059G>A | Nonsense Mutation | OR10S1 | p.Q114*  | olfactory receptor, famil | 92 (0.00)  | 55 (0.45)  | 1.21 |
| 12-01 | Gp4 | g.chr1:248436529G>T  | Silent            | OR2T33 | p.A196A  | olfactory receptor, famil | 116 (0.00) | 32 (0.19)  | 0.50 |
| 12-01 | Gp4 | g.chr1:248737322C>A  | Missense Mutation | OR2T34 | p.C246F  | olfactory receptor, famil | 102 (0.00) | 12 (0.42)  | 1.11 |
| 12-01 | Gp4 | g.chr5:180581978C>A  | Silent            | OR2V2  | p.G12G   | olfactory receptor, famil | 142 (0.00) | 109 (0.16) | 0.42 |
| 12-01 | Gp4 | g.chr5:180582620G>A  | Silent            | OR2V2  | p.V226V  | olfactory receptor, famil | 133 (0.00) | 138 (0.36) | 0.95 |
| 12-01 | Gp4 | g.chr1:247654410T>A  | RNA               | OR2W5  |          | olfactory receptor, famil | 50 (0.00)  | 23 (0.52)  | 1.39 |
| 12-01 | Gp4 | g.chr1:247655188G>T  | RNA               | OR2W5  |          | olfactory receptor, famil | 241 (0.00) | 74 (0.93)  | 2.49 |
| 12-01 | Gp4 | g.chr11:4661100T>A   | Missense Mutation | OR51D1 | p.V27E   | olfactory receptor, famil | 110 (0.00) | 12 (0.92)  | 2.44 |
| 12-01 | Gp4 | g.chr11:4703027C>T   | Missense Mutation | OR51E2 | p.M305I  | olfactory receptor, famil | 103 (0.00) | 27 (0.96)  | 2.57 |
| 12-01 | Gp4 | g.chr11:6221104G>A   | Silent            | OR52W1 | p.L217L  | olfactory receptor, famil | 95 (0.00)  | 33 (0.15)  | 0.40 |
| 12-01 | Gp4 | g.chr11:59211077C>T  | Missense Mutation | OR5A1  | p.R146C  | olfactory receptor, famil | 195 (0.00) | 36 (0.50)  | 1.33 |
| 12-01 | Gp4 | g.chr3:97868365A>T   | Missense Mutation | OR5H14 | p.I46F   | olfactory receptor, famil | 80 (0.00)  | 124 (0.48) | 1.29 |
| 12-01 | Gp4 | g.chr2:240969831C>T  | Missense Mutation | OR6B2  | p.V6I    | olfactory receptor, famil | 92 (0.01)  | 162 (0.15) | 0.41 |
| 12-01 | Gp4 | g.chr2:240969844C>A  | Start Codon SNP   | OR6B2  | p.M1I    | olfactory receptor, famil | 92 (0.00)  | 165 (0.22) | 0.60 |
| 12-01 | Gp4 | g.chr2:240984550C>T  | Missense Mutation | OR6B3  | p.G314R  | olfactory receptor, famil | 435 (0.00) | 508 (0.17) | 0.44 |
| 12-01 | Gp4 | g.chr1:247876006G>A  | Missense Mutation | OR6F1  | p.P18S   | olfactory receptor, famil | 329 (0.00) | 99 (0.92)  | 2.45 |
| 12-01 | Gp4 | g.chr19:9225567G>A   | Silent            | OR7G1  | p.S291S  | olfactory receptor, famil | 154 (0.00) | 129 (0.90) | 2.40 |
| 12-01 | Gp4 | g.chr22:31289631G>A  | Missense Mutation | OSBP2  | p.D701N  | oxysterol binding protei  | 83 (0.00)  | 96 (0.16)  | 0.42 |
| 12-01 | Gp4 | g.chr19:54600416C>A  | Nonsense Mutation | OSCAR  | p.G40*   | osteoclast associated, in | 47 (0.00)  | 25 (0.28)  | 0.75 |

|       |     |                     |                   |             |          |                            |            |            |      |
|-------|-----|---------------------|-------------------|-------------|----------|----------------------------|------------|------------|------|
| 12-01 | Gp4 | g.chr2:241078694G>C | Missense Mutation | OTOS        | p.Q55E   | otospiralin                | 68 (0.00)  | 21 (0.67)  | 1.78 |
| 12-01 | Gp4 | g.chr2:63282914C>A  | Silent            | OTX1        | p.I176I  | orthodenticle homeobox 27  | 62 (0.00)  | 62 (0.29)  | 0.77 |
| 12-01 | Gp4 | g.chr11:65562071C>G | Missense Mutation | OVOL1       | p.F127L  | ovo-like zinc finger 1     | 50 (0.00)  | 31 (0.19)  | 0.52 |
| 12-01 | Gp4 | g.chr17:3801344G>T  | Missense Mutation | P2RX1       | p.Q365K  | purinergic receptor P2X 44 | 58 (0.00)  | 58 (0.26)  | 0.69 |
| 12-01 | Gp4 | g.chr17:3591929T>C  | Missense Mutation | P2RX5-TAX11 | p.Y293C  | P2RX5-TAX1BP3 read         | 62 (0.00)  | 171 (0.19) | 0.50 |
| 12-01 | Gp4 | g.chr11:72945588C>G | Missense Mutation | P2RY2       | p.S128R  | purinergic receptor P2Y 44 | 202 (0.02) | 202 (0.57) | 1.52 |
| 12-01 | Gp4 | g.chr11:65988215G>A | Silent            | PACS1       | p.E384E  | phosphofurin acidic clus   | 56 (0.00)  | 138 (0.21) | 0.56 |
| 12-01 | Gp4 | g.chr22:43280495G>C | Missense Mutation | PACSIN2     | p.Q228E  | protein kinase C and cas   | 137 (0.00) | 28 (0.93)  | 2.48 |
| 12-01 | Gp4 | g.chr11:47202016C>A | Missense Mutation | PACSIN3     | p.R146M  | protein kinase C and cas   | 58 (0.00)  | 24 (0.54)  | 1.44 |
| 12-01 | Gp4 | g.chr1:17555137G>T  | Missense Mutation | PADI1       | p.D224Y  | peptidyl arginine deimir   | 185 (0.00) | 48 (0.54)  | 1.44 |
| 12-01 | Gp4 | g.chr1:17674447G>T  | Missense Mutation | PADI4       | p.E353D  | peptidyl arginine deimir   | 52 (0.00)  | 205 (0.16) | 0.43 |
| 12-01 | Gp4 | g.chr1:17701952G>T  | RNA               | PADI6       |          | peptidyl arginine deimir   | 61 (0.00)  | 44 (0.18)  | 0.48 |
| 12-01 | Gp4 | g.chr17:2577502G>T  | Nonsense Mutation | PAFAH1B1    | p.E274*  | platelet-activating factor | 143 (0.00) | 10 (0.70)  | 1.87 |
| 12-01 | Gp4 | g.chr10:72326411G>C | Missense Mutation | PALD1       | p.Q831H  | phosphatase domain cor     | 22 (0.00)  | 23 (0.65)  | 1.74 |
| 12-01 | Gp4 | g.chr9:118950120C>A | Missense Mutation | PAPPA       | p.P368Q  | pregnancy-associated pl    | 41 (0.00)  | 27 (0.70)  | 1.88 |
| 12-01 | Gp4 | g.chr9:119097242G>T | Missense Mutation | PAPPA       | p.S1167I | pregnancy-associated pl    | 89 (0.00)  | 90 (0.18)  | 0.47 |
| 12-01 | Gp4 | g.chr4:75858577G>T  | Missense Mutation | PARM1       | p.A14S   | prostate androgen-regul    | 37 (0.03)  | 287 (0.24) | 0.65 |
| 12-01 | Gp4 | g.chr16:14576539C>A | Missense Mutation | PARN        | p.Q542H  | poly(A)-specific ribonu    | 107 (0.01) | 240 (0.28) | 0.73 |
| 12-01 | Gp4 | g.chr16:14576633T>A | Missense Mutation | PARN        | p.E511V  | poly(A)-specific ribonu    | 63 (0.00)  | 241 (0.16) | 0.43 |
| 12-01 | Gp4 | g.chr1:226568822C>T | Missense Mutation | PARP1       | p.G416E  | poly (ADP-ribose) poly     | 79 (0.00)  | 57 (0.19)  | 0.51 |
| 12-01 | Gp4 | g.chr7:139741597A>G | Silent            | PARP12      | p.C343C  | poly (ADP-ribose) poly     | 157 (0.01) | 129 (0.43) | 1.14 |
| 12-01 | Gp4 | g.chr3:122420148T>C | Missense Mutation | PARP14      | p.I916T  | poly (ADP-ribose) poly     | 102 (0.00) | 16 (0.44)  | 1.17 |
| 12-01 | Gp4 | g.chr5:50090811G>T  | Missense Mutation | PARP8       | p.D330Y  | poly (ADP-ribose) poly     | 33 (0.00)  | 184 (0.83) | 2.22 |
| 12-01 | Gp4 | g.chr1:55223849C>A  | Missense Mutation | PARS2       | p.C329F  | prolyl-tRNA synthetase     | 335 (0.00) | 452 (0.23) | 0.62 |
| 12-01 | Gp4 | g.chr22:31723240G>T | Missense Mutation | PATZ1       | p.D567E  | POZ (BTB) and AT hoc       | 35 (0.00)  | 168 (0.17) | 0.44 |
| 12-01 | Gp4 | g.chr21:34101853C>A | RNA               | PAXBP1-AS1  |          | PAXBP1 antisense RN        | 30 (0.00)  | 89 (0.53)  | 1.41 |
| 12-01 | Gp4 | g.chr3:52643843G>A  | Silent            | PBRM1       | p.L700L  | polybromo 1                | 62 (0.00)  | 38 (0.24)  | 0.63 |
| 12-01 | Gp4 | g.chr3:142895370C>T | RNA               | PBX2P1      |          | pre-B-cell leukemia hon    | 46 (0.00)  | 35 (0.17)  | 0.46 |
| 12-01 | Gp4 | g.chr1:154918089G>C | Missense Mutation | PBXIP1      | p.F687L  | pre-B-cell leukemia hon    | 132 (0.00) | 310 (0.45) | 1.20 |
| 12-01 | Gp4 | g.chr1:154918326G>T | Silent            | PBXIP1      | p.A608A  | pre-B-cell leukemia hon    | 89 (0.00)  | 71 (0.28)  | 0.75 |
| 12-01 | Gp4 | g.chr1:154920826C>G | Missense Mutation | PBXIP1      | p.E142D  | pre-B-cell leukemia hon    | 28 (0.00)  | 31 (0.23)  | 0.60 |
| 12-01 | Gp4 | g.chr2:70248739C>A  | RNA               | PCBP1-AS1   |          | PCBP1 antisense RNA        | 46 (0.00)  | 18 (0.28)  | 0.74 |
| 12-01 | Gp4 | g.chr21:47330866G>T | Silent            | PCBP3       | p.T142T  | poly(rC) binding proteir   | 43 (0.00)  | 25 (0.20)  | 0.53 |
| 12-01 | Gp4 | g.chr13:58208024C>A | Silent            | PCDH17      | p.G448G  | protocadherin 17           | 68 (0.00)  | 199 (0.32) | 0.84 |
| 12-01 | Gp4 | g.chr5:140236978G>T | Missense Mutation | PCDHA10     | p.D449Y  | protocadherin alpha 10     | 165 (0.00) | 153 (0.25) | 0.66 |

|       |     |                     |                   |          |          |                          |            |            |      |
|-------|-----|---------------------|-------------------|----------|----------|--------------------------|------------|------------|------|
| 12-01 | Gp4 | g.chr5:140248961C>G | Missense Mutation | PCDHA11  | p.D91E   | protocadherin alpha 11   | 279 (0.00) | 555 (0.40) | 1.06 |
| 12-01 | Gp4 | g.chr5:140250671G>T | Silent            | PCDHA11  | p.T661T  | protocadherin alpha 11   | 44 (0.00)  | 49 (0.24)  | 0.65 |
| 12-01 | Gp4 | g.chr5:140255554C>T | Missense Mutation | PCDHA12  | p.S166F  | protocadherin alpha 12   | 181 (0.00) | 40 (0.28)  | 0.73 |
| 12-01 | Gp4 | g.chr5:140187637G>A | Missense Mutation | PCDHA4   | p.V289M  | protocadherin alpha 4    | 48 (0.00)  | 107 (0.42) | 1.12 |
| 12-01 | Gp4 | g.chr5:140215854G>A | Missense Mutation | PCDHA7   | p.G629D  | protocadherin alpha 7    | 81 (0.00)  | 31 (0.52)  | 1.38 |
| 12-01 | Gp4 | g.chr5:140221347G>A | Missense Mutation | PCDHA8   | p.M147I  | protocadherin alpha 8    | 71 (0.00)  | 378 (0.49) | 1.32 |
| 12-01 | Gp4 | g.chr5:140221365G>A | Silent            | PCDHA8   | p.P153P  | protocadherin alpha 8    | 59 (0.00)  | 411 (0.29) | 0.78 |
| 12-01 | Gp4 | g.chr5:140228458T>A | Silent            | PCDHA9   | p.I126I  | protocadherin alpha 9    | 174 (0.00) | 35 (0.49)  | 1.30 |
| 12-01 | Gp4 | g.chr5:140615556A>T | RNA               | PCDHB18  |          | protocadherin beta 18 p  | 15 (0.00)  | 37 (0.19)  | 0.50 |
| 12-01 | Gp4 | g.chr5:140531466C>A | Missense Mutation | PCDHB6   | p.A543E  | protocadherin beta 6     | 42 (0.00)  | 110 (0.26) | 0.70 |
| 12-01 | Gp4 | g.chr5:140532185G>T | Nonsense Mutation | PCDHB6   | p.E783*  | protocadherin beta 6     | 145 (0.01) | 177 (0.57) | 1.52 |
| 12-01 | Gp4 | g.chr5:140794569C>G | Silent            | PCDHGA10 | p.S609S  | protocadherin gamma st   | 24 (0.00)  | 173 (0.37) | 0.99 |
| 12-01 | Gp4 | g.chr5:140801717T>A | Missense Mutation | PCDHGA11 | p.L308Q  | protocadherin gamma st   | 216 (0.00) | 23 (0.57)  | 1.51 |
| 12-01 | Gp4 | g.chr5:140810571G>A | Missense Mutation | PCDHGA12 | p.G82D   | protocadherin gamma st   | 93 (0.00)  | 35 (0.40)  | 1.07 |
| 12-01 | Gp4 | g.chr5:140811710C>T | Missense Mutation | PCDHGA12 | p.P462S  | protocadherin gamma st   | 144 (0.00) | 149 (0.53) | 1.41 |
| 12-01 | Gp4 | g.chr5:140890686C>A | Silent            | PCDHGA12 | p.A915A  | protocadherin gamma st   | 88 (0.00)  | 93 (0.30)  | 0.80 |
| 12-01 | Gp4 | g.chr5:140719935C>A | Missense Mutation | PCDHGA2  | p.P466H  | protocadherin gamma st   | 88 (0.00)  | 59 (0.31)  | 0.81 |
| 12-01 | Gp4 | g.chr5:140772810G>T | Nonsense Mutation | PCDHGA8  | p.E144*  | protocadherin gamma st   | 233 (0.00) | 197 (0.34) | 0.89 |
| 12-01 | Gp4 | g.chr5:140768078C>T | Silent            | PCDHGB4  | p.H209H  | protocadherin gamma st   | 114 (0.00) | 48 (0.98)  | 2.61 |
| 12-01 | Gp4 | g.chr5:140869414G>A | Missense Mutation | PCDHGC5  | p.E203K  | protocadherin gamma st   | 157 (0.00) | 13 (0.77)  | 2.05 |
| 12-01 | Gp4 | g.chr5:140871163G>T | Missense Mutation | PCDHGC5  | p.D786Y  | protocadherin gamma st   | 26 (0.00)  | 81 (0.22)  | 0.59 |
| 12-01 | Gp4 | g.chr11:82880692T>C | Silent            | PCF11    | p.F1105F | PCF11 cleavage and pol   | 71 (0.00)  | 135 (0.20) | 0.53 |
| 12-01 | Gp4 | g.chr20:44569748C>A | Nonsense Mutation | PCIF1    | p.S192*  | PDX1 C-terminal inhibi   | 98 (0.00)  | 75 (0.67)  | 1.78 |
| 12-01 | Gp4 | g.chr7:82584608G>T  | Silent            | PCLO     | p.P1887P | piccolo presynaptic cyto | 59 (0.00)  | 26 (0.50)  | 1.33 |
| 12-01 | Gp4 | g.chr7:82784924G>A  | Nonsense Mutation | PCLO     | p.Q345*  | piccolo presynaptic cyto | 93 (0.00)  | 151 (0.83) | 2.23 |
| 12-01 | Gp4 | g.chr21:47808738G>T | Silent            | PCNT     | p.R1182R | pericentrin              | 26 (0.00)  | 16 (0.31)  | 0.83 |
| 12-01 | Gp4 | g.chr21:47809289G>T | Missense Mutation | PCNT     | p.Q1261H | pericentrin              | 80 (0.00)  | 94 (0.30)  | 0.79 |
| 12-01 | Gp4 | g.chr21:47847700C>A | Silent            | PCNT     | p.I2495I | pericentrin              | 30 (0.00)  | 31 (0.16)  | 0.43 |
| 12-01 | Gp4 | g.chr14:71443720G>T | Missense Mutation | PCNX     | p.Q222H  | pecanex homolog (Dros    | 46 (0.02)  | 161 (0.58) | 1.56 |
| 12-01 | Gp4 | g.chr14:71444788G>A | Silent            | PCNX     | p.R578R  | pecanex homolog (Dros    | 168 (0.00) | 43 (0.98)  | 2.60 |
| 12-01 | Gp4 | g.chr11:65386293G>T | Missense Mutation | PCNXL3   | p.G487V  | pecanex-like 3 (Drosopl  | 30 (0.00)  | 102 (0.15) | 0.39 |
| 12-01 | Gp4 | g.chr11:65397067C>T | Silent            | PCNXL3   | p.D1359D | pecanex-like 3 (Drosopl  | 26 (0.00)  | 30 (0.30)  | 0.80 |
| 12-01 | Gp4 | g.chr11:65403976C>A | Missense Mutation | PCNXL3   | p.P1903H | pecanex-like 3 (Drosopl  | 28 (0.00)  | 22 (0.64)  | 1.70 |
| 12-01 | Gp4 | g.chr14:60600773G>T | Missense Mutation | PCNXL4   | p.W1118L | pecanex-like 4 (Drosopl  | 33 (0.03)  | 42 (0.74)  | 1.97 |
| 12-01 | Gp4 | g.chr19:1490161C>A  | Missense Mutation | PCSK4    | p.G62V   | proprotein convertase st | 16 (0.00)  | 25 (0.52)  | 1.39 |

|       |     |                      |                   |         |          |                                     |            |      |
|-------|-----|----------------------|-------------------|---------|----------|-------------------------------------|------------|------|
| 12-01 | Gp4 | g.chr11:117097987G>A | Missense Mutation | PCSK7   | p.H219Y  | proprotein convertase su 158 (0.00) | 383 (0.27) | 0.72 |
| 12-01 | Gp4 | g.chr5:148743705G>T  | Missense Mutation | PCYOX1L | p.W134C  | prenylcysteine oxidase 150 (0.00)   | 61 (0.34)  | 0.92 |
| 12-01 | Gp4 | g.chr3:57542385G>T   | Missense Mutation | PDE12   | p.K93N   | phosphodiesterase 12 19 (0.00)      | 114 (0.34) | 0.91 |
| 12-01 | Gp4 | g.chr3:57542725G>T   | Nonsense Mutation | PDE12   | p.E207*  | phosphodiesterase 12 173 (0.00)     | 484 (0.20) | 0.52 |
| 12-01 | Gp4 | g.chr12:54963391C>T  | Missense Mutation | PDE1B   | p.L117F  | phosphodiesterase 1B, c46 (0.00)    | 40 (0.20)  | 0.53 |
| 12-01 | Gp4 | g.chr11:72295920T>A  | Missense Mutation | PDE2A   | p.D452V  | phosphodiesterase 2A, c43 (0.00)    | 38 (0.29)  | 0.77 |
| 12-01 | Gp4 | g.chr19:18329026G>T  | Silent            | PDE4C   | p.A421A  | phosphodiesterase 4C, c70 (0.00)    | 75 (0.47)  | 1.24 |
| 12-01 | Gp4 | g.chr19:18329296G>T  | Missense Mutation | PDE4C   | p.L360M  | phosphodiesterase 4C, c95 (0.00)    | 69 (0.48)  | 1.28 |
| 12-01 | Gp4 | g.chr21:44152210C>T  | Missense Mutation | PDE9A   | p.A98V   | phosphodiesterase 9A 126 (0.00)     | 95 (0.16)  | 0.42 |
| 12-01 | Gp4 | g.chr5:149497301G>A  | Missense Mutation | PDGFRB  | p.S1006F | platelet-derived growth 118 (0.00)  | 106 (0.21) | 0.55 |
| 12-01 | Gp4 | g.chr8:94934980T>A   | Missense Mutation | PDP1    | p.D231E  | pyruvate dehydrogenase j32 (0.00)   | 16 (0.94)  | 2.50 |
| 12-01 | Gp4 | g.chr16:70011867T>A  | RNA               | PDXDC2P |          | pyridoxal-dependent de277 (0.00)    | 18 (0.44)  | 1.19 |
| 12-01 | Gp4 | g.chr5:32072383C>A   | Nonsense Mutation | PDZD2   | p.C895*  | PDZ domain containing 127 (0.00)    | 142 (0.23) | 0.62 |
| 12-01 | Gp4 | g.chr5:32072424G>T   | Splice Site       | PDZD2   |          | PDZ domain containing 91 (0.00)     | 109 (0.23) | 0.61 |
| 12-01 | Gp4 | g.chr1:145762298C>A  | Nonsense Mutation | PDZK1   | p.S492*  | PDZ domain containing 137 (0.00)    | 9 (0.67)   | 1.78 |
| 12-01 | Gp4 | g.chr1:156883050C>G  | Silent            | PEAR1   | p.S829S  | platelet endothelial aggr 95 (0.00) | 196 (0.60) | 1.61 |
| 12-01 | Gp4 | g.chr1:32101038C>G   | Missense Mutation | PEF1    | p.G37A   | penta-EF-hand domain c48 (0.00)     | 14 (0.86)  | 2.29 |
| 12-01 | Gp4 | g.chr7:94293188G>T   | Missense Mutation | PEG10   | p.S107I  | paternally expressed 10 212 (0.00)  | 229 (0.76) | 2.03 |
| 12-01 | Gp4 | g.chr19:57325096G>T  | Missense Mutation | PEG3    | p.L1572I | paternally expressed 3 84 (0.00)    | 48 (0.75)  | 2.00 |
| 12-01 | Gp4 | g.chr5:52096402C>G   | Missense Mutation | PELO    | p.S58R   | pelota homolog (Drosop29 (0.00)     | 96 (0.42)  | 1.11 |
| 12-01 | Gp4 | g.chr17:8048289C>G   | Silent            | PER1    | p.L747L  | period circadian clock 1 41 (0.00)  | 35 (0.46)  | 1.22 |
| 12-01 | Gp4 | g.chr19:7550724C>A   | Splice Site       | PEX11G  | p.Q83H   | peroxisomal biogenesis 137 (0.00)   | 102 (0.38) | 1.02 |
| 12-01 | Gp4 | g.chrX:77224622C>T   | Missense Mutation | PGAM4   | p.V172I  | phosphoglycerate mutas40 (0.00)     | 11 (0.82)  | 1.36 |
| 12-01 | Gp4 | g.chr19:46522564G>A  | Missense Mutation | PGLYRP1 | p.R175C  | peptidoglycan recogniti23 (0.00)    | 75 (0.44)  | 1.47 |
| 12-01 | Gp4 | g.chr11:74109174G>T  | Silent            | PGM2L1  | p.S11S   | phosphoglucomutase 2-151 (0.00)     | 124 (0.23) | 0.60 |
| 12-01 | Gp4 | g.chr20:58348339G>T  | Missense Mutation | PHACTR3 | p.A253S  | phosphatase and actin re 124 (0.00) | 58 (0.19)  | 0.51 |
| 12-01 | Gp4 | g.chr9:123620515G>A  | Missense Mutation | PHF19   | p.P484S  | PHD finger protein 19 63 (0.00)     | 25 (0.44)  | 1.17 |
| 12-01 | Gp4 | g.chr22:41864145C>A  | Missense Mutation | PHF5A   | p.G20V   | PHD finger protein 5A 128 (0.00)    | 53 (0.47)  | 1.26 |
| 12-01 | Gp4 | g.chr1:120277283C>A  | Silent            | PHGDH   | p.S179S  | phosphoglycerate dehyd387 (0.00)    | 136 (0.16) | 0.43 |
| 12-01 | Gp4 | g.chr16:30768413G>T  | Missense Mutation | PHKG2   | p.G406C  | phosphorylase kinase, g:65 (0.00)   | 54 (0.59)  | 1.58 |
| 12-01 | Gp4 | g.chr1:201437722C>A  | Nonsense Mutation | PHLDA3  | p.E65*   | pleckstrin homology-lik 31 (0.00)   | 79 (0.54)  | 1.45 |
| 12-01 | Gp4 | g.chr11:118516514G>T | Missense Mutation | PHLDB1  | p.A1160S | pleckstrin homology-lik 119 (0.00)  | 170 (0.36) | 0.96 |
| 12-01 | Gp4 | g.chr18:60518494T>C  | Intron            | PHLPP1  |          | PH domain and leucine :112 (0.00)   | 74 (0.16)  | 0.43 |
| 12-01 | Gp4 | g.chr18:60518518G>T  | Intron            | PHLPP1  |          | PH domain and leucine :120 (0.00)   | 96 (0.28)  | 0.75 |
| 12-01 | Gp4 | g.chr18:60543610T>A  | Intron            | PHLPP1  |          | PH domain and leucine :23 (0.00)    | 64 (0.44)  | 1.17 |



|       |     |                      |                   |          |          |                                  |            |            |      |
|-------|-----|----------------------|-------------------|----------|----------|----------------------------------|------------|------------|------|
| 12-01 | Gp4 | g.chr18:60599443C>G  | Intron            | PHLPP1   |          | PH domain and leucine            | 21 (0.00)  | 40 (0.33)  | 0.87 |
| 12-01 | Gp4 | g.chr18:60645899G>T  | Silent            | PHLPP1   | p.G1463G | PH domain and leucine            | 151 (0.00) | 142 (0.27) | 0.73 |
| 12-01 | Gp4 | g.chr11:605173G>A    | Missense Mutation | PHRF1    | p.V403I  | PHD and ring finger do           | 85 (0.00)  | 94 (0.20)  | 0.54 |
| 12-01 | Gp4 | g.chr22:21096918G>A  | Silent            | PI4KA    | p.T1197T | phosphatidylinositol 4-k         | 93 (0.00)  | 114 (0.16) | 0.42 |
| 12-01 | Gp4 | g.chr1:145578455G>T  | Nonsense Mutation | PIAS3    | p.E140*  | protein inhibitor of activ       | 90 (0.00)  | 32 (0.34)  | 0.92 |
| 12-01 | Gp4 | g.chr15:65114565C>A  | Missense Mutation | PIF1     | p.K239N  | PIF1 5'-to-3' DNA helic          | 61 (0.00)  | 82 (0.20)  | 0.52 |
| 12-01 | Gp4 | g.chr9:35091480G>T   | Silent            | PIGO     | p.R802R  | phosphatidylinositol gly         | 114 (0.00) | 53 (0.17)  | 0.45 |
| 12-01 | Gp4 | g.chr9:35092045G>T   | Silent            | PIGO     | p.P613P  | phosphatidylinositol gly         | 110 (0.00) | 157 (0.24) | 0.63 |
| 12-01 | Gp4 | g.chr9:35092108G>T   | Silent            | PIGO     | p.G592G  | phosphatidylinositol gly         | 112 (0.00) | 132 (0.36) | 0.95 |
| 12-01 | Gp4 | g.chr20:44047974G>T  | Missense Mutation | PIGT     | p.R178L  | phosphatidylinositol gly         | 69 (0.00)  | 60 (0.30)  | 0.80 |
| 12-01 | Gp4 | g.chr1:9780040G>A    | Missense Mutation | PIK3CD   | p.G435E  | phosphatidylinositol-4,5         | 135 (0.00) | 145 (0.22) | 0.59 |
| 12-01 | Gp4 | g.chr19:18272788C>A  | Missense Mutation | PIK3R2   | p.S276R  | phosphoinositide-3-kina          | 81 (0.00)  | 73 (0.26)  | 0.69 |
| 12-01 | Gp4 | g.chr7:99987565G>A   | Missense Mutation | PILRA    | p.S170N  | paired immunoglobulin-l          | 37 (0.00)  | 19 (0.89)  | 2.39 |
| 12-01 | Gp4 | g.chr22:50356413G>T  | Silent            | PIM3     | p.L231L  | Pim-3 proto-oncogene, ε          | 46 (0.00)  | 25 (0.52)  | 1.39 |
| 12-01 | Gp4 | g.chr1:151214647G>T  | Missense Mutation | PIP5K1A  | p.R459L  | phosphatidylinositol-4- $\gamma$ | 234 (0.00) | 89 (0.52)  | 1.38 |
| 12-01 | Gp4 | g.chr10:95719178G>T  | RNA               | PIPSL    |          | PIP5K1A and PSMD4-l              | 261 (0.00) | 247 (0.40) | 1.06 |
| 12-01 | Gp4 | g.chr12:123472830G>T | Nonsense Mutation | PITPNM2  | p.S983*  | phosphatidylinositol tra         | 184 (0.00) | 283 (0.19) | 0.52 |
| 12-01 | Gp4 | g.chr5:134364583C>T  | Silent            | PITX1    | p.T277T  | paired-like homeodoma            | 40 (0.00)  | 26 (0.27)  | 0.72 |
| 12-01 | Gp4 | g.chr16:2160900G>A   | Missense Mutation | PKD1     | p.P1423L | polycystic kidney diseas         | 35 (0.00)  | 14 (0.36)  | 0.95 |
| 12-01 | Gp4 | g.chr16:72005941C>A  | RNA               | PKD1L3   |          | polycystic kidney diseas         | 31 (0.00)  | 15 (0.40)  | 0.44 |
| 12-01 | Gp4 | g.chr2:42282441G>T   | Missense Mutation | PKDCC    | p.G377V  | protein kinase domain c          | 30 (0.00)  | 64 (0.17)  | 0.46 |
| 12-01 | Gp4 | g.chr6:51890152G>A   | Missense Mutation | PKHD1    | p.P1486S | polycystic kidney and h          | 27 (0.00)  | 16 (0.69)  | 1.83 |
| 12-01 | Gp4 | g.chr6:51890639G>T   | Missense Mutation | PKHD1    | p.N1323K | polycystic kidney and h          | 67 (0.00)  | 146 (0.43) | 1.15 |
| 12-01 | Gp4 | g.chr20:43246989G>T  | Missense Mutation | PKIG     | p.G72V   | protein kinase (cAMP-d           | 85 (0.00)  | 10 (0.50)  | 1.33 |
| 12-01 | Gp4 | g.chr2:159526278T>A  | Missense Mutation | PKP4     | p.N925K  | plakophilin 4                    | 165 (0.00) | 124 (0.21) | 0.56 |
| 12-01 | Gp4 | g.chr22:31531801G>T  | Missense Mutation | PLA2G3   | p.L480M  | phospholipase A2, grou           | 155 (0.01) | 41 (0.49)  | 1.30 |
| 12-01 | Gp4 | g.chr22:31534342C>T  | Silent            | PLA2G3   | p.V234V  | phospholipase A2, grou           | 18 (0.00)  | 56 (0.27)  | 0.71 |
| 12-01 | Gp4 | g.chr20:30784556G>T  | Missense Mutation | PLAGL2   | p.A397D  | pleiomorphic adenoma ξ           | 60 (0.00)  | 39 (0.74)  | 1.98 |
| 12-01 | Gp4 | g.chr12:113825651C>A | Silent            | PLBD2    | p.A482A  | phospholipase B domair           | 326 (0.00) | 454 (0.17) | 0.46 |
| 12-01 | Gp4 | g.chr10:96006154G>C  | Missense Mutation | PLCE1    | p.V958L  | phospholipase C, epsilo          | 197 (0.00) | 39 (0.69)  | 1.85 |
| 12-01 | Gp4 | g.chr17:4722075G>T   | Silent            | PLD2     | p.L710L  | phospholipase D2                 | 36 (0.00)  | 66 (0.45)  | 1.21 |
| 12-01 | Gp4 | g.chr8:144994818C>A  | Silent            | PLEC     | p.L3194L | plectin                          | 89 (0.00)  | 187 (0.17) | 0.46 |
| 12-01 | Gp4 | g.chr8:144998374C>G  | Missense Mutation | PLEC     | p.R2045P | plectin                          | 15 (0.00)  | 83 (0.17)  | 0.45 |
| 12-01 | Gp4 | g.chr5:143317C>A     | Missense Mutation | PLEKHG4B | p.Q189K  | pleckstrin homology do           | 89 (0.00)  | 19 (0.58)  | 1.54 |
| 12-01 | Gp4 | g.chr19:4510571G>A   | Missense Mutation | PLIN4    | p.T1120M | perilipin 4                      | 50 (0.00)  | 24 (0.71)  | 1.89 |

|       |     |                      |                   |            |          |                            |             |            |      |
|-------|-----|----------------------|-------------------|------------|----------|----------------------------|-------------|------------|------|
| 12-01 | Gp4 | g.chr19:4512431T>G   | Missense Mutation | PLIN4      | p.K500T  | perilipin 4                | 95 (0.00)   | 44 (0.30)  | 0.79 |
| 12-01 | Gp4 | g.chr1:45271225G>T   | Missense Mutation | PLK3       | p.V606L  | polo-like kinase 3         | 306 (0.00)  | 155 (0.37) | 1.00 |
| 12-01 | Gp4 | g.chrX:153697457T>C  | Missense Mutation | PLXNA3     | p.L1498P | plexin A3                  | 35 (0.00)   | 23 (0.57)  | 0.94 |
| 12-01 | Gp4 | g.chr15:74336687C>A  | Missense Mutation | PML        | p.L663I  | promyelocytic leukemia 121 | 121 (0.00)  | 391 (0.14) | 0.38 |
| 12-01 | Gp4 | g.chr15:74336952G>T  | Missense Mutation | PML        | p.R751L  | promyelocytic leukemia 65  | 65 (0.00)   | 85 (0.21)  | 0.56 |
| 12-01 | Gp4 | g.chr22:41973894C>T  | Missense Mutation | PMM1       | p.G195D  | phosphomannomutase 1       | 87 (0.00)   | 17 (0.53)  | 1.41 |
| 12-01 | Gp4 | g.chr9:139311552G>T  | Missense Mutation | PMPCA      | p.E261D  | peptidase (mitochondria)   | 145 (0.00)  | 188 (0.26) | 0.68 |
| 12-01 | Gp4 | g.chr10:118385618C>T | RNA               | PNLIPRP2   |          | pancreatic lipase-related  | 223 (0.00)  | 235 (0.63) | 1.69 |
| 12-01 | Gp4 | g.chr19:46973623G>T  | Missense Mutation | PNMAL1     | p.Q224K  | paraneoplastic Ma antig    | 73 (0.00)   | 89 (0.61)  | 2.03 |
| 12-01 | Gp4 | g.chr8:28196592C>A   | Silent            | PNOC       | p.P54P   | prepronociceptin           | 88 (0.00)   | 105 (0.34) | 0.91 |
| 12-01 | Gp4 | g.chr3:52183318G>T   | Silent            | POC1A      | p.A121A  | POC1 centriolar protein    | 120 (0.00)  | 12 (0.75)  | 2.00 |
| 12-01 | Gp4 | g.chr12:89918910G>T  | Missense Mutation | POC1B-GALN | p.N29K   | POC1B-GALNT4 readt         | 26 (0.00)   | 10 (0.50)  | 1.33 |
| 12-01 | Gp4 | g.chr22:42995743C>G  | Missense Mutation | POLDIP3    | p.Q198H  | polymerase (DNA-direc      | 75 (0.00)   | 37 (0.19)  | 0.50 |
| 12-01 | Gp4 | g.chr15:89867343G>A  | Nonsense Mutation | POLG       | p.Q689*  | polymerase (DNA direc      | 231 (0.00)  | 103 (0.54) | 1.45 |
| 12-01 | Gp4 | g.chr4:2073962G>T    | Missense Mutation | POLN       | p.A861D  | polymerase (DNA direc      | 30 (0.00)   | 142 (0.19) | 0.51 |
| 12-01 | Gp4 | g.chr13:28239886G>A  | Silent            | POLR1D     | p.L55L   | polymerase (RNA) I pol     | 130 (0.01)  | 63 (0.94)  | 2.50 |
| 12-01 | Gp4 | g.chr17:7416866C>A   | Missense Mutation | POLR2A     | p.S1761R | polymerase (RNA) II (E     | 660 (0.00)  | 544 (0.32) | 0.86 |
| 12-01 | Gp4 | g.chr11:62533149G>A  | Missense Mutation | POLR2G     | p.E142K  | polymerase (RNA) II (E     | 124 (0.00)  | 12 (0.92)  | 2.44 |
| 12-01 | Gp4 | g.chr7:44027773G>C   | RNA               | POLR2J4    |          | polymerase (RNA) II (E     | 71 (0.00)   | 48 (0.15)  | 0.39 |
| 12-01 | Gp4 | g.chr7:44054330G>A   | RNA               | POLR2J4    |          | polymerase (RNA) II (E     | 236 (0.00)  | 165 (0.52) | 1.39 |
| 12-01 | Gp4 | g.chr3:43122095C>G   | Missense Mutation | POMGNT2    | p.V277L  | protein O-linked manno     | 168 (0.00)  | 13 (0.85)  | 2.26 |
| 12-01 | Gp4 | g.chr9:134393900C>A  | Missense Mutation | POMT1      | p.H447Q  | protein-O-mannosyltran     | 388 (0.00)  | 38 (0.55)  | 1.47 |
| 12-01 | Gp4 | g.chr1:167381230C>T  | Silent            | POU2F1     | p.T519T  | POU class 2 homeobox       | 72 (0.00)   | 19 (0.79)  | 2.11 |
| 12-01 | Gp4 | g.chr1:203014590C>A  | Missense Mutation | PPFIA4     | p.T254K  | protein tyrosine phosph    | 25 (0.00)   | 71 (0.17)  | 0.45 |
| 12-01 | Gp4 | g.chr16:4944480G>T   | Missense Mutation | PPL        | p.A461D  | periplakin                 | 28 (0.00)   | 85 (0.18)  | 0.47 |
| 12-01 | Gp4 | g.chr19:55614909G>T  | Missense Mutation | PPP1R12C   | p.A200E  | protein phosphatase 1, r   | 122 (0.00)  | 109 (0.83) | 2.23 |
| 12-01 | Gp4 | g.chr14:104202478C>A | Missense Mutation | PPP1R13B   | p.E1031D | protein phosphatase 1, r   | 97 (0.00)   | 103 (0.63) | 1.68 |
| 12-01 | Gp4 | g.chr14:104208394G>T | Missense Mutation | PPP1R13B   | p.Q519K  | protein phosphatase 1, r   | 265 (0.00)  | 364 (0.24) | 0.63 |
| 12-01 | Gp4 | g.chr19:52709250C>G  | Silent            | PPP2R1A    | p.A68A   | protein phosphatase 2, r   | 125 (0.00)  | 49 (0.33)  | 0.87 |
| 12-01 | Gp4 | g.chr16:30094142A>G  | Missense Mutation | PPP4C      | p.T93A   | protein phosphatase 4, c   | 31 (0.00)   | 15 (0.60)  | 1.60 |
| 12-01 | Gp4 | g.chr22:50832488C>A  | Missense Mutation | PPP6R2     | p.Q51K   | protein phosphatase 6, r   | 276 (0.00)  | 153 (0.35) | 0.92 |
| 12-01 | Gp4 | g.chr22:50876638C>A  | Missense Mutation | PPP6R2     | p.D598E  | protein phosphatase 6, r   | 113 (0.00)  | 430 (0.22) | 0.58 |
| 12-01 | Gp4 | g.chr10:103900170C>A | Silent            | PPRC1      | p.V635V  | peroxisome proliferator-   | 34 (0.00)   | 51 (0.25)  | 0.68 |
| 12-01 | Gp4 | g.chr19:8563824G>C   | Missense Mutation | PRAM1      | p.L290V  | PML-RARA regulated ε       | 43 (0.00)   | 41 (0.59)  | 1.56 |
| 12-01 | Gp4 | g.chr1:12887323C>T   | Silent            | PRAMEF11   | p.L178L  | PRAME family membe         | 1357 (0.00) | 26 (0.46)  | 1.23 |

|       |     |                      |                   |           |          |                           |            |            |      |
|-------|-----|----------------------|-------------------|-----------|----------|---------------------------|------------|------------|------|
| 12-01 | Gp4 | g.chr21:43236080C>A  | Missense Mutation | PRDM15    | p.K828N  | PR domain containing 1    | 23 (0.00)  | 43 (0.19)  | 0.50 |
| 12-01 | Gp4 | g.chr1:14108202G>A   | Silent            | PRDM2     | p.Q1304Q | PR domain containing 2    | 129 (0.00) | 119 (0.48) | 1.28 |
| 12-01 | Gp4 | g.chr6:126965353G>T  | RNA               | PRELID1P1 |          | PRELI domain containi     | 79 (0.00)  | 43 (0.23)  | 0.62 |
| 12-01 | Gp4 | g.chr10:72358597G>C  | Missense Mutation | PRF1      | p.Q294E  | perforin 1 (pore forming  | 187 (0.00) | 490 (0.31) | 0.84 |
| 12-01 | Gp4 | g.chr3:64084742G>T   | Missense Mutation | PRICKLE2  | p.N896K  | prickle homolog 2 (Dro    | 89 (0.00)  | 53 (0.15)  | 0.40 |
| 12-01 | Gp4 | g.chr12:57135571G>A  | Nonsense Mutation | PRIM1     | p.Q267*  | primase, DNA, polypep     | 93 (0.00)  | 26 (0.19)  | 0.51 |
| 12-01 | Gp4 | g.chr12:57135574G>C  | Missense Mutation | PRIM1     | p.L266V  | primase, DNA, polypep     | 93 (0.00)  | 27 (0.19)  | 0.49 |
| 12-01 | Gp4 | g.chr12:57135576G>A  | Missense Mutation | PRIM1     | p.S265L  | primase, DNA, polypep     | 93 (0.00)  | 26 (0.19)  | 0.51 |
| 12-01 | Gp4 | g.chr3:53217164G>T   | Missense Mutation | PRKCD     | p.C200F  | protein kinase C, delta   | 62 (0.00)  | 12 (0.50)  | 1.33 |
| 12-01 | Gp4 | g.chr3:53222774G>T   | Missense Mutation | PRKCD     | p.G485V  | protein kinase C, delta   | 108 (0.00) | 106 (0.48) | 1.28 |
| 12-01 | Gp4 | g.chr16:68387463G>T  | Missense Mutation | PRMT7     | p.M548I  | protein arginine methyl   | 102 (0.00) | 78 (0.28)  | 0.75 |
| 12-01 | Gp4 | g.chr22:18918535C>T  | Silent            | PRODH     | p.L150L  | proline dehydrogenase     | (86 (0.00) | 47 (0.34)  | 0.91 |
| 12-01 | Gp4 | g.chr19:36297597T>C  | Missense Mutation | PRODH2    | p.T348A  | proline dehydrogenase     | (42 (0.00) | 67 (0.19)  | 0.52 |
| 12-01 | Gp4 | g.chr3:93692526T>A   | Missense Mutation | PROS1     | p.E23V   | protein S (alpha)         | 46 (0.00)  | 32 (0.56)  | 1.50 |
| 12-01 | Gp4 | g.chr14:75330160C>A  | Missense Mutation | PROX2     | p.R126S  | prospero homeobox 2       | 92 (0.00)  | 167 (0.24) | 0.64 |
| 12-01 | Gp4 | g.chr19:54625248C>A  | Missense Mutation | PRPF31    | p.P83Q   | pre-mRNA processing f     | 22 (0.00)  | 54 (0.70)  | 1.88 |
| 12-01 | Gp4 | g.chr12:49689213G>A  | Missense Mutation | PRPH      | p.R77H   | peripherin                | 19 (0.00)  | 12 (0.75)  | 2.00 |
| 12-01 | Gp4 | g.chr3:138724820G>C  | Silent            | PRR23A    | p.L97L   | proline rich 23A          | 22 (0.00)  | 11 (0.64)  | 1.70 |
| 12-01 | Gp4 | g.chr9:134353300G>T  | Nonsense Mutation | PRRC2B    | p.G832*  | proline-rich coiled-coil  | 150 (0.00) | 117 (0.50) | 1.34 |
| 12-01 | Gp4 | g.chr9:79322352C>T   | Missense Mutation | PRUNE2    | p.S1613N | prune homolog 2 (Drosc    | 33 (0.00)  | 44 (0.64)  | 1.70 |
| 12-01 | Gp4 | g.chr10:104172151G>T | Missense Mutation | PSD       | p.H579N  | pleckstrin and Sec7 dom   | 85 (0.00)  | 122 (0.23) | 0.61 |
| 12-01 | Gp4 | g.chr10:104173622T>C | Missense Mutation | PSD       | p.E486G  | pleckstrin and Sec7 dom   | 78 (0.00)  | 91 (0.24)  | 0.64 |
| 12-01 | Gp4 | g.chr2:113958776C>A  | Silent            | PSD4      | p.R956R  | pleckstrin and Sec7 dom   | 291 (0.00) | 136 (0.32) | 0.84 |
| 12-01 | Gp4 | g.chr14:23511540C>A  | Missense Mutation | PSMB11    | p.Q36K   | proteasome (prosome, n    | 118 (0.00) | 17 (0.53)  | 1.41 |
| 12-01 | Gp4 | g.chr17:61907739C>T  | Missense Mutation | PSMC5     | p.P144S  | proteasome (prosome, n    | 151 (0.00) | 399 (0.51) | 1.36 |
| 12-01 | Gp4 | g.chr15:77322885G>T  | Missense Mutation | PSTPIP1   | p.R202L  | proline-serine-threonine  | 54 (0.00)  | 167 (0.39) | 1.04 |
| 12-01 | Gp4 | g.chr6:42883815G>T   | Missense Mutation | PTCRA     | p.G3V    | pre T-cell antigen recept | 101 (0.00) | 242 (0.43) | 1.13 |
| 12-01 | Gp4 | g.chr10:23482773C>T  | Missense Mutation | PTF1A     | p.L309F  | pancreas specific transcr | 281 (0.00) | 118 (0.49) | 1.31 |
| 12-01 | Gp4 | g.chr9:132502052G>T  | Silent            | PTGES     | p.A99A   | prostaglandin E synthas   | 15 (0.00)  | 43 (0.23)  | 0.62 |
| 12-01 | Gp4 | g.chr9:132515204C>G  | Missense Mutation | PTGES     | p.V30L   | prostaglandin E synthas   | 65 (0.00)  | 18 (0.33)  | 0.89 |
| 12-01 | Gp4 | g.chr9:130885298C>A  | Missense Mutation | PTGES2    | p.G268C  | prostaglandin E synthas   | 27 (0.00)  | 151 (0.48) | 1.29 |
| 12-01 | Gp4 | g.chr1:117484557C>A  | Silent            | PTGFRN    | p.G90G   | prostaglandin F2 recept   | 109 (0.00) | 128 (0.53) | 1.42 |
| 12-01 | Gp4 | g.chr1:117504142G>A  | Silent            | PTGFRN    | p.T497T  | prostaglandin F2 recept   | 214 (0.00) | 177 (0.47) | 1.27 |
| 12-01 | Gp4 | g.chr3:46945134G>T   | Missense Mutation | PTH1R     | p.E590D  | parathyroid hormone 1 r   | 44 (0.00)  | 86 (0.45)  | 1.21 |
| 12-01 | Gp4 | g.chr20:49195833T>C  | Silent            | PTPN1     | p.G277G  | protein tyrosine phosph   | 73 (0.00)  | 58 (0.60)  | 1.61 |

|       |     |                     |                   |           |          |                                                          |            |      |
|-------|-----|---------------------|-------------------|-----------|----------|----------------------------------------------------------|------------|------|
| 12-01 | Gp4 | g.chr4:87622813G>A  | Missense Mutation | PTPN13    | p.D352N  | protein tyrosine phosphatase 63 (0.00)                   | 17 (0.53)  | 1.41 |
| 12-01 | Gp4 | g.chr4:87729008G>C  | Silent            | PTPN13    | p.L2352L | protein tyrosine phosphatase 38 (0.00)                   | 80 (0.65)  | 1.73 |
| 12-01 | Gp4 | g.chr3:47447984A>T  | Missense Mutation | PTPN23    | p.Y214F  | protein tyrosine phosphatase 26 (0.00)                   | 30 (0.30)  | 0.80 |
| 12-01 | Gp4 | g.chr3:47450951G>T  | Silent            | PTPN23    | p.V614V  | protein tyrosine phosphatase 37 (0.00)                   | 135 (0.52) | 1.38 |
| 12-01 | Gp4 | g.chr11:18754241G>T | Silent            | PTPN5     | p.T385T  | protein tyrosine phosphatase 64 (0.00)                   | 15 (0.33)  | 0.89 |
| 12-01 | Gp4 | g.chr1:44064476C>A  | Missense Mutation | PTPRF     | p.S735R  | protein tyrosine phosphatase 24 (0.00)                   | 55 (0.45)  | 1.21 |
| 12-01 | Gp4 | g.chr1:44069477G>T  | Missense Mutation | PTPRF     | p.G876V  | protein tyrosine phosphatase 194 (0.01)                  | 126 (0.33) | 0.87 |
| 12-01 | Gp4 | g.chr1:44069529G>T  | Missense Mutation | PTPRF     | p.E893D  | protein tyrosine phosphatase 112 (0.00)                  | 84 (0.60)  | 1.59 |
| 12-01 | Gp4 | g.chr1:44072039G>T  | Missense Mutation | PTPRF     | p.K1195N | protein tyrosine phosphatase 183 (0.00)                  | 377 (0.74) | 1.98 |
| 12-01 | Gp4 | g.chr1:29606101C>A  | Missense Mutation | PTPRU     | p.S566Y  | protein tyrosine phosphatase 86 (0.00)                   | 55 (0.65)  | 1.75 |
| 12-01 | Gp4 | g.chr3:157154771G>A | Missense Mutation | PTX3      | p.A17T   | pentraxin 3, long 51 (0.00)                              | 69 (0.72)  | 1.93 |
| 12-01 | Gp4 | g.chr21:45548143C>A | Missense Mutation | PWP2      | p.S792Y  | PWP2 periodic tryptophan 141 (0.00)                      | 94 (0.18)  | 0.48 |
| 12-01 | Gp4 | g.chr20:32302503C>T | Missense Mutation | PXMP4     | p.M51I   | peroxisomal membrane protein 169 (0.00)                  | 124 (0.44) | 1.18 |
| 12-01 | Gp4 | g.chr3:49094994G>T  | Silent            | QRICH1    | p.I213I  | glutamine-rich 1 87 (0.00)                               | 13 (0.92)  | 2.46 |
| 12-01 | Gp4 | g.chr15:66161939G>T | Missense Mutation | RAB11A    | p.D6Y    | RAB11A, member RAS domain 57 (0.00)                      | 145 (0.64) | 1.71 |
| 12-01 | Gp4 | g.chr17:29848279G>T | Missense Mutation | RAB11FIP4 | p.G220V  | RAB11 family interacting protein 101 (0.00)              | 17 (0.29)  | 0.78 |
| 12-01 | Gp4 | g.chr17:29855463C>A | Missense Mutation | RAB11FIP4 | p.L466M  | RAB11 family interacting protein 83 (0.00)               | 170 (0.19) | 0.50 |
| 12-01 | Gp4 | g.chr22:23492292C>A | Missense Mutation | RAB36     | p.H104N  | RAB36, member RAS domain 37 (0.00)                       | 53 (0.25)  | 0.65 |
| 12-01 | Gp4 | g.chr19:18308470C>G | Splice Site       | RAB3A     | p.G158A  | RAB3A, member RAS domain 117 (0.00)                      | 81 (0.19)  | 0.49 |
| 12-01 | Gp4 | g.chr3:128809940C>A | Nonstop Mutation  | RAB43     | p.*213L  | RAB43, member RAS domain 30 (0.00)                       | 128 (0.38) | 1.00 |
| 12-01 | Gp4 | g.chr3:133558382C>A | Silent            | RAB6B     | p.L123L  | RAB6B, member RAS domain 34 (0.00)                       | 35 (0.14)  | 0.38 |
| 12-01 | Gp4 | g.chr16:28922458G>A | Missense Mutation | RABEP2    | p.R313W  | rabaptin, RAB GTPase 132 (0.00)                          | 52 (0.52)  | 1.38 |
| 12-01 | Gp4 | g.chr16:28935786G>T | Missense Mutation | RABEP2    | p.A71D   | rabaptin, RAB GTPase 190 (0.00)                          | 70 (0.57)  | 1.52 |
| 12-01 | Gp4 | g.chr22:37637674G>A | Silent            | RAC2      | p.L13L   | ras-related C3 botulinum toxin substrate 1 51 (0.00)     | 36 (0.33)  | 0.89 |
| 12-01 | Gp4 | g.chr7:4917283G>A   | Missense Mutation | RADIL     | p.S163L  | Ras association and domain interacting protein 64 (0.00) | 174 (0.22) | 0.58 |
| 12-01 | Gp4 | g.chr9:135974071C>A | Missense Mutation | RALGDS    | p.R883L  | ral guanine nucleotide dissociation inhibitor 69 (0.00)  | 60 (0.23)  | 0.62 |
| 12-01 | Gp4 | g.chr9:129937045C>T | Silent            | RALGPS1   | p.S298S  | Ral GEF with PH domain 171 (0.00)                        | 160 (0.26) | 0.70 |
| 12-01 | Gp4 | g.chr16:67762370A>G | Missense Mutation | RANBP10   | p.V466A  | RAN binding protein 10 51 (0.00)                         | 19 (0.26)  | 0.70 |
| 12-01 | Gp4 | g.chr19:5931427C>T  | Silent            | RANBP3    | p.V227V  | RAN binding protein 3 74 (0.00)                          | 58 (0.16)  | 0.41 |
| 12-01 | Gp4 | g.chr19:5941630A>C  | Splice Site       | RANBP3    |          | RAN binding protein 3 77 (0.00)                          | 61 (0.30)  | 0.79 |
| 12-01 | Gp4 | g.chr22:41648966A>G | Silent            | RANGAP1   | p.P430P  | Ran GTPase activating protein 38 (0.00)                  | 48 (0.15)  | 0.39 |
| 12-01 | Gp4 | g.chr9:134455675C>A | Missense Mutation | RAPGEF1   | p.D1037Y | Rap guanine nucleotide dissociation inhibitor 81 (0.00)  | 68 (0.37)  | 0.98 |
| 12-01 | Gp4 | g.chr9:134497311C>T | Missense Mutation | RAPGEF1   | p.E593K  | Rap guanine nucleotide dissociation inhibitor 73 (0.00)  | 103 (0.25) | 0.67 |
| 12-01 | Gp4 | g.chr12:48141332G>T | Nonsense Mutation | RAPGEF3   | p.C517*  | Rap guanine nucleotide dissociation inhibitor 16 (0.00)  | 46 (0.43)  | 1.16 |
| 12-01 | Gp4 | g.chr5:179545850G>T | Missense Mutation | RASGEF1C  | p.S308R  | RasGEF domain family, class C 36 (0.03)                  | 108 (0.59) | 1.58 |

|       |     |                      |                   |         |          |                            |            |            |      |
|-------|-----|----------------------|-------------------|---------|----------|----------------------------|------------|------------|------|
| 12-01 | Gp4 | g.chr15:79307748C>A  | Missense Mutation | RASGRF1 | p.V583L  | Ras protein-specific gua   | 102 (0.00) | 59 (0.98)  | 2.62 |
| 12-01 | Gp4 | g.chr11:64508450C>A  | Missense Mutation | RASGRP2 | p.R114L  | RAS guanyl releasing p     | 339 (0.00) | 335 (0.18) | 0.47 |
| 12-01 | Gp4 | g.chr19:38903677T>C  | Missense Mutation | RASGRP4 | p.N477D  | RAS guanyl releasing p     | 117 (0.00) | 67 (0.22)  | 0.60 |
| 12-01 | Gp4 | g.chr19:38903686C>G  | Missense Mutation | RASGRP4 | p.V474L  | RAS guanyl releasing p     | 118 (0.00) | 66 (0.24)  | 0.65 |
| 12-01 | Gp4 | g.chr13:48913138G>T  | Intron            | RB1     |          | retinoblastoma 1           | 32 (0.00)  | 59 (0.17)  | 0.45 |
| 12-01 | Gp4 | g.chr1:110884306C>A  | Missense Mutation | RBM15   | p.S760Y  | RNA binding motif prot     | 65 (0.00)  | 74 (0.59)  | 1.59 |
| 12-01 | Gp4 | g.chr7:155504151T>C  | Splice Site       | RBM33   |          | RNA binding motif prot     | 44 (0.00)  | 74 (0.49)  | 1.30 |
| 12-01 | Gp4 | g.chr1:235324256G>T  | Missense Mutation | RBM34   | p.F60L   | RNA binding motif prot     | 158 (0.00) | 70 (0.24)  | 0.65 |
| 12-01 | Gp4 | g.chr3:50005997C>A   | Nonsense Mutation | RBM6    | p.S380*  | RNA binding motif prot     | 38 (0.00)  | 93 (0.45)  | 1.20 |
| 12-01 | Gp4 | g.chr3:50107953G>C   | Missense Mutation | RBM6    | p.G15A   | RNA binding motif prot     | 25 (0.00)  | 118 (0.38) | 1.02 |
| 12-01 | Gp4 | g.chr15:65043822C>A  | Missense Mutation | RBPM52  | p.V35F   | RNA binding protein wi     | 86 (0.00)  | 118 (0.43) | 1.15 |
| 12-01 | Gp4 | g.chr1:211486246G>T  | Missense Mutation | RCOR3   | p.E420D  | REST corepressor 3         | 206 (0.00) | 24 (0.38)  | 1.00 |
| 12-01 | Gp4 | g.chr17:9801487T>C   | Silent            | RCVRN   | p.T176T  | recoverin                  | 400 (0.00) | 401 (0.15) | 0.41 |
| 12-01 | Gp4 | g.chr17:73627280G>T  | Missense Mutation | RECQL5  | p.H500N  | RecQ protein-like 5        | 101 (0.00) | 78 (0.21)  | 0.55 |
| 12-01 | Gp4 | g.chr5:137781285G>C  | Missense Mutation | REEP2   | p.E192Q  | receptor accessory prote   | 23 (0.00)  | 224 (0.17) | 0.44 |
| 12-01 | Gp4 | g.chr1:204128634C>A  | Silent            | REN     | p.V194V  | renin                      | 82 (0.00)  | 54 (0.56)  | 1.48 |
| 12-01 | Gp4 | g.chr1:204128658C>A  | Missense Mutation | REN     | p.M186I  | renin                      | 88 (0.00)  | 49 (0.24)  | 0.65 |
| 12-01 | Gp4 | g.chr1:204128702G>A  | Nonsense Mutation | REN     | p.Q172*  | renin                      | 102 (0.00) | 54 (0.57)  | 1.53 |
| 12-01 | Gp4 | g.chr10:43598027C>G  | Missense Mutation | RET     | p.P192R  | ret proto-oncogene         | 146 (0.00) | 191 (0.21) | 0.57 |
| 12-01 | Gp4 | g.chr2:85576639C>G   | Missense Mutation | RETSAT  | p.G289R  | retinol saturase (all-tran | 97 (0.00)  | 87 (0.21)  | 0.55 |
| 12-01 | Gp4 | g.chr6:111643790A>T  | Missense Mutation | REV3L   | p.V2778E | REV3-like, polymerase      | 74 (0.00)  | 13 (0.38)  | 1.03 |
| 12-01 | Gp4 | g.chr17:80008620T>A  | Missense Mutation | RFNG    | p.N113Y  | RFNG O-fucosylpeptide      | 52 (0.00)  | 40 (0.25)  | 0.67 |
| 12-01 | Gp4 | g.chr3:53126469G>T   | Silent            | RFT1    | p.P419P  | RFT1 homolog (S. cerev     | 62 (0.00)  | 12 (0.50)  | 1.33 |
| 12-01 | Gp4 | g.chr19:11513383C>T  | Splice Site       | RGL3    |          | ral guanine nucleotide d   | 41 (0.00)  | 58 (0.16)  | 0.41 |
| 12-01 | Gp4 | g.chr2:113157289C>A  | Missense Mutation | RGPD8   | p.A519S  | RANBP2-like and GRII       | 55 (0.00)  | 33 (0.48)  | 1.29 |
| 12-01 | Gp4 | g.chr4:3318888G>T    | Missense Mutation | RGS12   | p.G331C  | regulator of G-protein si  | 119 (0.00) | 177 (0.40) | 1.05 |
| 12-01 | Gp4 | g.chr4:3417846C>A    | Missense Mutation | RGS12   | p.Q809K  | regulator of G-protein si  | 23 (0.00)  | 29 (0.41)  | 1.10 |
| 12-01 | Gp4 | g.chr4:3419237G>T    | Missense Mutation | RGS12   | p.Q910H  | regulator of G-protein si  | 30 (0.00)  | 93 (0.54)  | 1.43 |
| 12-01 | Gp4 | g.chr17:30615876C>A  | Missense Mutation | RHBDL3  | p.S22R   | rhomboid, veinlet-like 3   | 121 (0.00) | 84 (0.20)  | 0.54 |
| 12-01 | Gp4 | g.chr12:124008049C>A | Missense Mutation | RILPL1  | p.K151N  | Rab interacting lysosom    | 174 (0.01) | 95 (0.81)  | 2.16 |
| 12-01 | Gp4 | g.chr12:130927050C>T | Missense Mutation | RIMBP2  | p.D266N  | RIMS binding protein 2     | 140 (0.00) | 46 (0.22)  | 0.58 |
| 12-01 | Gp4 | g.chr11:66100009C>A  | Missense Mutation | RIN1    | p.G531V  | Ras and Rab interactor     | 114 (0.00) | 30 (0.63)  | 1.69 |
| 12-01 | Gp4 | g.chr14:93022193C>T  | Missense Mutation | RIN3    | p.R48W   | Ras and Rab interactor     | 70 (0.00)  | 11 (0.91)  | 2.42 |
| 12-01 | Gp4 | g.chr6:3078037G>T    | Missense Mutation | RIPK1   | p.E63D   | receptor (TNFRSF)-inte     | 141 (0.00) | 235 (0.12) | 0.39 |
| 12-01 | Gp4 | g.chr16:67691373C>A  | Missense Mutation | RLTPR   | p.S1420R | RGD motif, leucine rich    | 44 (0.00)  | 115 (0.17) | 0.44 |

|       |     |                      |                   |                |         |                          |            |            |      |
|-------|-----|----------------------|-------------------|----------------|---------|--------------------------|------------|------------|------|
| 12-01 | Gp4 | g.chr17:74150380T>C  | Silent            | RNF157         | p.G598G | ring finger protein 157  | 180 (0.00) | 38 (0.55)  | 1.47 |
| 12-01 | Gp4 | g.chr18:44013351C>A  | Missense Mutation | RNF165         | p.T87N  | ring finger protein 165  | 37 (0.00)  | 41 (0.20)  | 0.52 |
| 12-01 | Gp4 | g.chr3:196210760G>A  | Silent            | RNF168         | p.N187N | ring finger protein 168, | 32 (0.00)  | 27 (0.26)  | 0.69 |
| 12-01 | Gp4 | g.chr1:45101747C>A   | Missense Mutation | RNF220         | p.H347N | ring finger protein 220  | 447 (0.00) | 549 (0.23) | 0.60 |
| 12-01 | Gp4 | g.chr1:151789697C>T  | Missense Mutation | RORC           | p.G44R  | RAR-related orphan rec   | 76 (0.01)  | 12 (0.92)  | 2.44 |
| 12-01 | Gp4 | g.chr8:33832298G>T   | lincRNA           | RP1-273G13.3   |         |                          | 19 (0.00)  | 34 (0.38)  | 1.02 |
| 12-01 | Gp4 | g.chr17:29934869G>T  | lincRNA           | RP1-41C23.1    |         |                          | 48 (0.00)  | 28 (0.29)  | 0.76 |
| 12-01 | Gp4 | g.chr12:110323443C>T | lincRNA           | RP1-7G5.6      |         |                          | 17 (0.00)  | 30 (0.33)  | 0.89 |
| 12-01 | Gp4 | g.chr10:135215740G>T | Missense Mutation | RP11-108K14.   | p.A226S |                          | 46 (0.00)  | 66 (0.86)  | 2.30 |
| 12-01 | Gp4 | g.chr11:76093241G>A  | Silent            | RP11-111M22    | p.S123S |                          | 94 (0.00)  | 141 (0.38) | 1.02 |
| 12-01 | Gp4 | g.chr12:23229453C>A  | lincRNA           | RP11-114G22.1  |         |                          | 19 (0.00)  | 23 (0.57)  | 1.51 |
| 12-01 | Gp4 | g.chr16:31995213G>T  | RNA               | RP11-1166P10.1 |         |                          | 19 (0.00)  | 31 (0.35)  | 0.95 |
| 12-01 | Gp4 | g.chr16:32077287G>T  | RNA               | RP11-1166P10.6 |         |                          | 99 (0.00)  | 69 (0.32)  | 0.85 |
| 12-01 | Gp4 | g.chr4:178392930G>T  | RNA               | RP11-130F10.1  |         |                          | 35 (0.00)  | 31 (0.65)  | 1.72 |
| 12-01 | Gp4 | g.chr4:178611456G>C  | lincRNA           | RP11-140M13.1  |         |                          | 25 (0.00)  | 66 (0.55)  | 1.45 |
| 12-01 | Gp4 | g.chr13:34196860C>A  | lincRNA           | RP11-141M1.3   |         |                          | 44 (0.00)  | 44 (0.23)  | 0.61 |
| 12-01 | Gp4 | g.chr3:192874368T>C  | lincRNA           | RP11-143P4.2   |         |                          | 102 (0.00) | 21 (0.33)  | 0.89 |
| 12-01 | Gp4 | g.chr4:133557567C>T  | lincRNA           | RP11-149A7.2   |         |                          | 30 (0.00)  | 30 (0.80)  | 2.13 |
| 12-01 | Gp4 | g.chr17:55156215G>T  | lincRNA           | RP11-166P13.3  |         |                          | 15 (0.00)  | 44 (0.25)  | 0.67 |
| 12-01 | Gp4 | g.chr8:57390259G>T   | RNA               | RP11-17A4.2    |         |                          | 93 (0.01)  | 49 (0.90)  | 2.39 |
| 12-01 | Gp4 | g.chr8:57390296G>T   | RNA               | RP11-17A4.2    |         |                          | 82 (0.00)  | 48 (0.96)  | 2.56 |
| 12-01 | Gp4 | g.chr1:238067929C>G  | RNA               | RP11-193H5.1   |         |                          | 16 (0.00)  | 14 (0.43)  | 1.14 |
| 12-01 | Gp4 | g.chr16:2546942G>A   | Missense Mutation | RP11-20I23.1   | p.V265M |                          | 60 (0.00)  | 142 (0.20) | 0.54 |
| 12-01 | Gp4 | g.chr4:167385173C>T  | lincRNA           | RP11-217C7.1   |         |                          | 52 (0.00)  | 37 (0.22)  | 0.58 |
| 12-01 | Gp4 | g.chr8:139060196C>A  | lincRNA           | RP11-238K6.1   |         |                          | 22 (0.00)  | 42 (0.55)  | 1.46 |
| 12-01 | Gp4 | g.chr13:52849788C>T  | RNA               | RP11-248G5.8   |         |                          | 22 (0.00)  | 48 (0.33)  | 0.89 |
| 12-01 | Gp4 | g.chr12:8388071C>T   | lincRNA           | RP11-266K4.9   |         |                          | 246 (0.00) | 67 (0.97)  | 0.99 |
| 12-01 | Gp4 | g.chr9:89628014G>A   | lincRNA           | RP11-276H19.2  |         |                          | 44 (0.00)  | 67 (0.15)  | 0.40 |
| 12-01 | Gp4 | g.chr10:51785778A>G  | RNA               | RP11-324H6.5   |         |                          | 54 (0.00)  | 103 (0.24) | 0.65 |
| 12-01 | Gp4 | g.chr15:89592144T>C  | lincRNA           | RP11-326A19.4  |         |                          | 38 (0.00)  | 18 (0.67)  | 1.78 |
| 12-01 | Gp4 | g.chr4:13801403G>T   | lincRNA           | RP11-341G5.1   |         |                          | 15 (0.00)  | 22 (0.73)  | 1.94 |
| 12-01 | Gp4 | g.chr15:93255340A>G  | RNA               | RP11-386M24.8  |         |                          | 99 (0.00)  | 139 (0.24) | 0.63 |
| 12-01 | Gp4 | g.chr13:64413507C>A  | lincRNA           | RP11-394A14.2  |         |                          | 54 (0.00)  | 23 (0.35)  | 0.93 |
| 12-01 | Gp4 | g.chr17:40699415C>A  | RNA               | RP11-400F19.8  |         |                          | 50 (0.00)  | 23 (0.61)  | 0.51 |
| 12-01 | Gp4 | g.chr1:142813228C>T  | lincRNA           | RP11-423O2.5   |         |                          | 271 (0.00) | 74 (0.95)  | 2.52 |

|       |     |                      |                   |                      |            |            |      |
|-------|-----|----------------------|-------------------|----------------------|------------|------------|------|
| 12-01 | Gp4 | g.chr17:50486787C>A  | lincRNA           | RP11-429O1.1         | 19 (0.00)  | 17 (0.47)  | 1.25 |
| 12-01 | Gp4 | g.chr1:246940638G>T  | RNA               | RP11-439E19.8        | 98 (0.00)  | 41 (0.95)  | 2.54 |
| 12-01 | Gp4 | g.chr1:246943618G>T  | RNA               | RP11-439E19.8        | 221 (0.00) | 330 (0.41) | 1.10 |
| 12-01 | Gp4 | g.chr12:46986693T>A  | lincRNA           | RP11-446N19.1        | 32 (0.00)  | 29 (0.66)  | 1.75 |
| 12-01 | Gp4 | g.chr3:109479074C>A  | lincRNA           | RP11-457K10.1        | 41 (0.00)  | 41 (0.32)  | 0.85 |
| 12-01 | Gp4 | g.chr16:56188615C>A  | lincRNA           | RP11-461O7.1         | 20 (0.00)  | 11 (0.64)  | 1.70 |
| 12-01 | Gp4 | g.chr7:76687141C>A   | RNA               | RP11-467H10.2        | 143 (0.01) | 76 (0.61)  | 1.61 |
| 12-01 | Gp4 | g.chr7:76689864G>A   | RNA               | RP11-467H10.2        | 71 (0.00)  | 252 (0.27) | 0.71 |
| 12-01 | Gp4 | g.chr4:121569078A>G  | lincRNA           | RP11-501E14.1        | 24 (0.00)  | 31 (0.23)  | 0.60 |
| 12-01 | Gp4 | g.chr7:102210313C>A  | Missense Mutation | RP11-514P8.7 p.R159I | 344 (0.00) | 137 (0.88) | 2.36 |
| 12-01 | Gp4 | g.chr7:102210336G>A  | Silent            | RP11-514P8.7 p.C151C | 362 (0.00) | 139 (0.88) | 2.36 |
| 12-01 | Gp4 | g.chr14:19412668G>A  | lincRNA           | RP11-536C10.16       | 168 (0.00) | 66 (0.26)  | 0.69 |
| 12-01 | Gp4 | g.chr14:19413431A>G  | lincRNA           | RP11-536C10.16       | 240 (0.00) | 78 (0.14)  | 0.38 |
| 12-01 | Gp4 | g.chr10:8464319A>G   | lincRNA           | RP11-543F8.2         | 55 (0.02)  | 53 (0.25)  | 0.65 |
| 12-01 | Gp4 | g.chr10:54495176G>C  | RNA               | RP11-556E13.1        | 27 (0.00)  | 49 (0.16)  | 0.44 |
| 12-01 | Gp4 | g.chr4:105708844G>T  | lincRNA           | RP11-556I14.2        | 59 (0.00)  | 41 (0.15)  | 0.39 |
| 12-01 | Gp4 | g.chr10:52419182C>G  | RNA               | RP11-564C4.6         | 20 (0.00)  | 11 (0.64)  | 1.70 |
| 12-01 | Gp4 | g.chr15:23101410G>T  | RNA               | RP11-566K19.6        | 25 (0.00)  | 33 (0.21)  | 0.67 |
| 12-01 | Gp4 | g.chr4:68312176T>C   | lincRNA           | RP11-584P21.2        | 42 (0.00)  | 108 (0.30) | 0.79 |
| 12-01 | Gp4 | g.chr11:30078450C>A  | lincRNA           | RP11-624D11.2        | 19 (0.00)  | 32 (0.19)  | 0.50 |
| 12-01 | Gp4 | g.chr12:90313312G>T  | lincRNA           | RP11-654D12.2        | 144 (0.00) | 318 (0.27) | 0.73 |
| 12-01 | Gp4 | g.chr18:976002G>A    | lincRNA           | RP11-689C9.1         | 31 (0.00)  | 11 (0.73)  | 1.94 |
| 12-01 | Gp4 | g.chr4:100020561G>A  | RNA               | RP11-696N14.1        | 24 (0.00)  | 25 (0.80)  | 2.13 |
| 12-01 | Gp4 | g.chr3:81072297C>A   | lincRNA           | RP11-6B4.1           | 27 (0.00)  | 17 (0.35)  | 1.13 |
| 12-01 | Gp4 | g.chr3:128664602T>C  | Missense Mutation | RP11-723O4.6 p.K70E  | 37 (0.00)  | 34 (0.21)  | 0.55 |
| 12-01 | Gp4 | g.chr18:12076002A>T  | RNA               | RP11-815J4.6         | 21 (0.00)  | 17 (0.41)  | 1.10 |
| 12-01 | Gp4 | g.chr18:12076234G>T  | RNA               | RP11-815J4.6         | 42 (0.00)  | 20 (0.30)  | 0.80 |
| 12-01 | Gp4 | g.chr5:175467761G>T  | RNA               | RP11-826N14.1        | 84 (0.00)  | 20 (0.50)  | 1.33 |
| 12-01 | Gp4 | g.chr11:94646260G>A  | RNA               | RP11-856F16.2        | 60 (0.00)  | 96 (0.67)  | 1.78 |
| 12-01 | Gp4 | g.chr3:165290761C>A  | lincRNA           | RP11-85M11.2         | 37 (0.00)  | 31 (0.16)  | 0.43 |
| 12-01 | Gp4 | g.chr8:81213300C>A   | lincRNA           | RP11-941H19.3        | 21 (0.00)  | 121 (0.40) | 1.08 |
| 12-01 | Gp4 | g.chr8:111991317T>C  | lincRNA           | RP11-946L20.2        | 47 (0.00)  | 46 (0.17)  | 0.46 |
| 12-01 | Gp4 | g.chr16:4303169G>A   | lincRNA           | RP11-95P2.1          | 18 (0.00)  | 33 (0.42)  | 1.13 |
| 12-01 | Gp4 | g.chr3:49025126C>G   | RNA               | RP13-131K19.2        | 21 (0.00)  | 20 (0.60)  | 1.60 |
| 12-01 | Gp4 | g.chr12:122029621G>A | lincRNA           | RP13-941N14.1        | 17 (0.00)  | 27 (0.26)  | 0.69 |

|       |     |                      |                   |               |          |                            |            |            |      |
|-------|-----|----------------------|-------------------|---------------|----------|----------------------------|------------|------------|------|
| 12-01 | Gp4 | g.chr6:134138214C>A  | RNA               | RP3-323P13.2  |          | 36 (0.03)                  | 24 (0.25)  | 0.67       |      |
| 12-01 | Gp4 | g.chr1:44570020G>T   | lincRNA           | RP5-1198O20.4 |          | 48 (0.00)                  | 35 (0.54)  | 1.45       |      |
| 12-01 | Gp4 | g.chr1:143663747T>C  | lincRNA           | RP6-206117.1  |          | 93 (0.00)                  | 77 (0.19)  | 0.52       |      |
| 12-01 | Gp4 | g.chr15:41823296T>C  | Missense Mutation | RPAP1         | p.T290A  | RNA polymerase II assc     | 195 (0.00) | 43 (0.16)  | 0.43 |
| 12-01 | Gp4 | g.chr1:84945089C>A   | Missense Mutation | RPF1          | p.P42H   | ribosome production fac    | 72 (0.00)  | 46 (0.17)  | 0.46 |
| 12-01 | Gp4 | g.chr19:5691439G>A   | Missense Mutation | RPL36         | p.R68Q   | ribosomal protein L36      | 100 (0.00) | 150 (0.54) | 1.44 |
| 12-01 | Gp4 | g.chr6:34386171G>T   | Missense Mutation | RPS10-NUDT3   | p.A144D  | RPS10-NUDT3 readthr        | 127 (0.00) | 96 (0.19)  | 0.50 |
| 12-01 | Gp4 | g.chr6:166833424T>C  | Missense Mutation | RPS6KA2       | p.D500G  | ribosomal protein S6 kir   | 72 (0.00)  | 137 (0.27) | 0.72 |
| 12-01 | Gp4 | g.chr14:75373777G>T  | Silent            | RPS6KL1       | p.V530V  | ribosomal protein S6 kir   | 53 (0.00)  | 318 (0.17) | 0.44 |
| 12-01 | Gp4 | g.chr15:40866098G>T  | Missense Mutation | RPUSD2        | p.D365Y  | RNA pseudouridylate sy     | 39 (0.03)  | 57 (0.16)  | 0.42 |
| 12-01 | Gp4 | g.chr20:17600974C>A  | Missense Mutation | RRBP1         | p.K750N  | ribosome binding protei    | 73 (0.00)  | 19 (0.58)  | 0.86 |
| 12-01 | Gp4 | g.chr6:7231300G>T    | Nonsense Mutation | RREB1         | p.E990*  | ras responsive element t   | 20 (0.00)  | 39 (0.51)  | 1.64 |
| 12-01 | Gp4 | g.chr6:7231571C>T    | Missense Mutation | RREB1         | p.T1080I | ras responsive element t   | 30 (0.00)  | 26 (0.73)  | 2.34 |
| 12-01 | Gp4 | g.chr16:29113395C>T  | RNA               | RRN3P2        |          | RNA polymerase I trans     | 64 (0.00)  | 464 (0.33) | 0.89 |
| 12-01 | Gp4 | g.chr17:48559483G>A  | Missense Mutation | RSAD1         | p.G169E  | radical S-adenosyl meth    | 87 (0.00)  | 239 (0.74) | 1.97 |
| 12-01 | Gp4 | g.chr7:77320873G>T   | lincRNA           | RSBN1L-AS1    |          |                            | 19 (0.00)  | 89 (0.39)  | 1.05 |
| 12-01 | Gp4 | g.chr15:55489055G>T  | Missense Mutation | RSL24D1       | p.P12T   | ribosomal L24 domain c     | 55 (0.00)  | 11 (0.82)  | 2.18 |
| 12-01 | Gp4 | g.chr6:159407420G>A  | Nonsense Mutation | RSPH3         | p.Q80*   | radial spoke 3 homolog     | 152 (0.00) | 17 (0.53)  | 1.41 |
| 12-01 | Gp4 | g.chr14:101347709C>T | Silent            | RTL1          | p.T1139T | retrotransposon-like 1     | 52 (0.02)  | 25 (0.40)  | 1.07 |
| 12-01 | Gp4 | g.chr5:179032905G>A  | Missense Mutation | RUFY1         | p.E521K  | RUN and FYVE domain        | 82 (0.00)  | 26 (0.69)  | 1.85 |
| 12-01 | Gp4 | g.chr1:25233851A>G   | Missense Mutation | RUNX3         | p.L215P  | runt-related transcriptio  | 145 (0.00) | 60 (0.25)  | 0.67 |
| 12-01 | Gp4 | g.chr9:35561362G>T   | Nonsense Mutation | RUSC2         | p.G1512* | RUN and SH3 domain c       | 24 (0.00)  | 61 (0.20)  | 0.52 |
| 12-01 | Gp4 | g.chr1:95712377C>A   | Missense Mutation | RWDD3         | p.A252E  | RWD domain containin       | 23 (0.00)  | 65 (0.94)  | 2.50 |
| 12-01 | Gp4 | g.chr9:137293533G>T  | Missense Mutation | RXRA          | p.M28I   | retinoid X receptor, alp   | 71 (0.00)  | 132 (0.29) | 0.77 |
| 12-01 | Gp4 | g.chr9:137321019C>A  | Missense Mutation | RXRA          | p.L326M  | retinoid X receptor, alp   | 63 (0.00)  | 73 (0.64)  | 1.72 |
| 12-01 | Gp4 | g.chr3:72438567G>T   | Intron            | RYBP          |          | RING1 and YY1 bindin       | 19 (0.00)  | 15 (0.33)  | 0.89 |
| 12-01 | Gp4 | g.chr3:72455960C>T   | Intron            | RYBP          |          | RING1 and YY1 bindin       | 72 (0.00)  | 9 (0.78)   | 2.07 |
| 12-01 | Gp4 | g.chr3:72477053T>C   | Intron            | RYBP          |          | RING1 and YY1 bindin       | 20 (0.00)  | 18 (0.44)  | 1.19 |
| 12-01 | Gp4 | g.chr19:38934416G>T  | Missense Mutation | RYR1          | p.G135V  | ryanodine receptor 1 (sk   | 70 (0.00)  | 368 (0.55) | 1.47 |
| 12-01 | Gp4 | g.chr19:39001164G>A  | Missense Mutation | RYR1          | p.E2987K | ryanodine receptor 1 (sk   | 86 (0.00)  | 77 (0.14)  | 0.38 |
| 12-01 | Gp4 | g.chr19:39008282C>A  | Silent            | RYR1          | p.I3323I | ryanodine receptor 1 (sk   | 47 (0.00)  | 23 (0.30)  | 0.81 |
| 12-01 | Gp4 | g.chr1:237870499A>G  | Silent            | RYR2          | p.L3277L | ryanodine receptor 2 (ca   | 109 (0.00) | 80 (0.38)  | 1.00 |
| 12-01 | Gp4 | g.chr15:33954469C>A  | Missense Mutation | RYR3          | p.L1580M | ryanodine receptor 3       | 43 (0.00)  | 34 (0.18)  | 0.47 |
| 12-01 | Gp4 | g.chr1:153512617G>A  | Silent            | S100A5        | p.H17H   | S100 calcium binding p     | 119 (0.00) | 211 (0.35) | 0.92 |
| 12-01 | Gp4 | g.chr16:51175304T>C  | Missense Mutation | SALL1         | p.T277A  | spalt-like transcription f | 190 (0.00) | 299 (0.38) | 1.03 |



|       |     |                      |                   |            |          |                                       |            |      |
|-------|-----|----------------------|-------------------|------------|----------|---------------------------------------|------------|------|
| 12-01 | Gp4 | g.chr20:50408009G>T  | Missense Mutation | SALL4      | p.A338D  | spalt-like transcription f 120 (0.00) | 172 (0.42) | 1.12 |
| 12-01 | Gp4 | g.chr20:50408295C>A  | Missense Mutation | SALL4      | p.A243S  | spalt-like transcription f 72 (0.00)  | 71 (0.41)  | 1.09 |
| 12-01 | Gp4 | g.chr19:39871716C>A  | Silent            | SAMD4B     | p.V645V  | sterile alpha motif doma51 (0.00)     | 135 (0.19) | 0.49 |
| 12-01 | Gp4 | g.chr22:50903476A>G  | Missense Mutation | SBF1       | p.V429A  | SET binding factor 1 25 (0.00)        | 51 (0.24)  | 0.63 |
| 12-01 | Gp4 | g.chr3:47459246C>A   | Missense Mutation | SCAP       | p.G840C  | SREBF chaperone 21 (0.00)             | 38 (0.18)  | 0.49 |
| 12-01 | Gp4 | g.chr11:193881A>G    | Silent            | SCGB1C1    | p.P75P   | secretoglobin, family 1C 76 (0.00)    | 94 (0.16)  | 0.43 |
| 12-01 | Gp4 | g.chr3:38949576G>T   | Missense Mutation | SCN11A     | p.T446N  | sodium channel, voltage 16 (0.00)     | 20 (0.50)  | 1.33 |
| 12-01 | Gp4 | g.chr8:144876073C>A  | Missense Mutation | SCRIB      | p.Q1302H | scribbled planar cell pol 76 (0.00)   | 342 (0.24) | 0.63 |
| 12-01 | Gp4 | g.chr11:65303528C>T  | Silent            | SCYL1      | p.L497L  | SCY1-like 1 (S. cerevisi63 (0.00)     | 69 (0.41)  | 1.08 |
| 12-01 | Gp4 | g.chr2:20403955G>T   | Silent            | SDC1       | p.G82G   | syndecan 1 140 (0.00)                 | 218 (0.19) | 0.50 |
| 12-01 | Gp4 | g.chr5:226017C>G     | Missense Mutation | SDHA       | p.P159R  | succinate dehydrogenas166 (0.00)      | 26 (0.19)  | 0.51 |
| 12-01 | Gp4 | g.chr3:195712471G>C  | RNA               | SDHAP1     |          | succinate dehydrogenas302 (0.00)      | 56 (0.57)  | 1.52 |
| 12-01 | Gp4 | g.chr7:4218193C>A    | Silent            | SDK1       | p.P1671P | sidekick cell adhesion n 139 (0.01)   | 392 (0.28) | 0.76 |
| 12-01 | Gp4 | g.chr2:192711595C>A  | Silent            | SDPR       | p.R19R   | serum deprivation respo 172 (0.00)    | 134 (0.30) | 0.80 |
| 12-01 | Gp4 | g.chr14:24909526C>T  | Silent            | SDR39U1    | p.L48L   | short chain dehydrogen2 116 (0.00)    | 55 (0.24)  | 0.63 |
| 12-01 | Gp4 | g.chr22:30891381C>A  | Missense Mutation | SEC14L4    | p.G95C   | SEC14-like 4 (S. cerevisi29 (0.00)    | 44 (0.43)  | 1.15 |
| 12-01 | Gp4 | g.chr9:139341421G>T  | Silent            | SEC16A     | p.L254L  | SEC16 homolog A (S. c 133 (0.00)      | 57 (0.33)  | 0.89 |
| 12-01 | Gp4 | g.chr5:133996842A>G  | Missense Mutation | SEC24A     | p.E44G   | SEC24 family member 190 (0.00)        | 104 (0.16) | 0.44 |
| 12-01 | Gp4 | g.chr17:80280072G>A  | Missense Mutation | SECTM1     | p.P238S  | secreted and transmemb 21 (0.00)      | 54 (0.20)  | 0.54 |
| 12-01 | Gp4 | g.chr2:97527188C>G   | Missense Mutation | SEMA4C     | p.R559S  | sema domain, immunog 39 (0.00)        | 30 (0.77)  | 2.04 |
| 12-01 | Gp4 | g.chr10:102740959C>T | Nonsense Mutation | SEMA4G     | p.R560*  | sema domain, immunog 117 (0.00)       | 35 (0.14)  | 0.38 |
| 12-01 | Gp4 | g.chr1:151108156C>A  | Silent            | SEMA6C     | p.G448G  | sema domain, transmem84 (0.00)        | 62 (0.31)  | 0.82 |
| 12-01 | Gp4 | g.chr1:151115058G>T  | Missense Mutation | SEMA6C     | p.L14M   | sema domain, transmem71 (0.00)        | 99 (0.15)  | 0.40 |
| 12-01 | Gp4 | g.chr1:26135179G>A   | Missense Mutation | SEPN1      | p.E182K  | selenoprotein N, 1 127 (0.00)         | 199 (0.50) | 1.33 |
| 12-01 | Gp4 | g.chr1:26140375C>G   | Nonsense Mutation | SEPN1      | p.S430*  | selenoprotein N, 1 100 (0.00)         | 47 (0.30)  | 0.79 |
| 12-01 | Gp4 | g.chr16:4829721C>A   | Missense Mutation | SEPT12     | p.G265C  | septin 12 79 (0.00)                   | 43 (0.21)  | 0.56 |
| 12-01 | Gp4 | g.chr7:55910680G>T   | Silent            | SEPT14     | p.S171S  | septin 14 236 (0.00)                  | 294 (0.14) | 0.38 |
| 12-01 | Gp4 | g.chr10:38681993C>T  | RNA               | SEPT7P9    |          | septin 7 pseudogene 9 27 (0.00)       | 123 (0.44) | 1.17 |
| 12-01 | Gp4 | g.chr1:67878912T>C   | Missense Mutation | SERBP1     | p.E402G  | SERPINE1 mRNA bind 15 (0.00)          | 21 (0.67)  | 1.78 |
| 12-01 | Gp4 | g.chr14:95107149G>A  | RNA               | SERPINA13P |          | serpin peptidase inhibitc 45 (0.00)   | 20 (0.60)  | 1.60 |
| 12-01 | Gp4 | g.chr1:28598236C>G   | Missense Mutation | SESN2      | p.L70V   | sestrin 2 147 (0.00)                  | 134 (0.33) | 0.88 |
| 12-01 | Gp4 | g.chr16:30970069G>C  | Missense Mutation | SETD1A     | p.G6A    | SET domain containing 85 (0.00)       | 39 (0.23)  | 0.62 |
| 12-01 | Gp4 | g.chr21:37408451G>T  | Silent            | SETD4      | p.A429A  | SET domain containing 195 (0.00)      | 105 (0.37) | 0.99 |
| 12-01 | Gp4 | g.chr9:135224765G>A  | Silent            | SETX       | p.F17F   | senataxin 79 (0.00)                   | 67 (0.15)  | 0.40 |
| 12-01 | Gp4 | g.chr16:29898974C>G  | Missense Mutation | SEZ6L2     | p.D402H  | seizure related 6 homolc 190 (0.00)   | 129 (0.98) | 2.60 |

|       |     |                      |                   |          |          |                            |            |            |      |
|-------|-----|----------------------|-------------------|----------|----------|----------------------------|------------|------------|------|
| 12-01 | Gp4 | g.chr22:32009652G>T  | Missense Mutation | SFI1     | p.G905V  | Sfi1 homolog, spindle a    | 15 (0.00)  | 17 (0.35)  | 0.94 |
| 12-01 | Gp4 | g.chr1:27189928G>T   | Missense Mutation | SFN      | p.E75D   | stratifin                  | 131 (0.00) | 193 (0.15) | 0.40 |
| 12-01 | Gp4 | g.chr10:102795264G>A | Missense Mutation | SFXN3    | p.V58M   | sideroflexin 3             | 94 (0.00)  | 85 (0.15)  | 0.41 |
| 12-01 | Gp4 | g.chr2:73198714C>A   | Missense Mutation | SFXN5    | p.K242N  | sideroflexin 5             | 84 (0.00)  | 26 (0.42)  | 1.13 |
| 12-01 | Gp4 | g.chr17:26939690G>T  | Missense Mutation | SGK494   | p.P165T  |                            | 61 (0.02)  | 30 (0.97)  | 2.58 |
| 12-01 | Gp4 | g.chr3:20225108G>A   | Missense Mutation | SGOL1    | p.P111S  | shugoshin-like 1 (S. pon   | 15 (0.00)  | 10 (0.70)  | 1.87 |
| 12-01 | Gp4 | g.chr22:40800295A>G  | Missense Mutation | SGSM3    | p.M68V   | small G protein signalin   | 135 (0.00) | 103 (0.19) | 0.52 |
| 12-01 | Gp4 | g.chr19:6760818G>A   | Nonsense Mutation | SH2D3A   | p.Q84*   | SH2 domain containing      | 89 (0.00)  | 140 (0.71) | 1.89 |
| 12-01 | Gp4 | g.chr9:130540871G>T  | Splice Site       | SH2D3C   | p.F12L   | SH2 domain containing      | 112 (0.00) | 51 (0.24)  | 0.63 |
| 12-01 | Gp4 | g.chr1:21050953G>T   | Missense Mutation | SH2D5    | p.S189Y  | SH2 domain containing      | 36 (0.00)  | 120 (0.26) | 0.69 |
| 12-01 | Gp4 | g.chr22:38046570G>T  | Missense Mutation | SH3BP1   | p.G479V  | SH3-domain binding pr      | 78 (0.00)  | 100 (0.50) | 1.33 |
| 12-01 | Gp4 | g.chr2:235950235C>A  | Silent            | SH3BP4   | p.P274P  | SH3-domain binding pr      | 207 (0.00) | 350 (0.20) | 0.54 |
| 12-01 | Gp4 | g.chr2:235950313G>A  | Silent            | SH3BP4   | p.L300L  | SH3-domain binding pr      | 137 (0.00) | 207 (0.61) | 1.64 |
| 12-01 | Gp4 | g.chr2:235950991G>T  | Missense Mutation | SH3BP4   | p.K526N  | SH3-domain binding pr      | 109 (0.00) | 44 (0.68)  | 1.82 |
| 12-01 | Gp4 | g.chr10:105376974C>T | Silent            | SH3PXD2A | p.L300L  | SH3 and PX domains 2/      | 30 (0.00)  | 12 (0.42)  | 1.11 |
| 12-01 | Gp4 | g.chr2:110048983C>A  | Missense Mutation | SH3RF3   | p.P477H  | SH3 domain containing      | 41 (0.00)  | 56 (0.71)  | 1.90 |
| 12-01 | Gp4 | g.chr4:8218773G>T    | Missense Mutation | SH3TC1   | p.A240S  | SH3 domain and tetratri    | 60 (0.00)  | 70 (0.26)  | 0.69 |
| 12-01 | Gp4 | g.chr22:51121794C>G  | Missense Mutation | SHANK3   | p.F304L  | SH3 and multiple ankyr     | 34 (0.00)  | 57 (0.23)  | 0.61 |
| 12-01 | Gp4 | g.chr9:37974820C>T   | Missense Mutation | SHB      | p.E285K  | Src homology 2 domain      | 60 (0.00)  | 36 (0.83)  | 2.22 |
| 12-01 | Gp4 | g.chr17:7534663C>A   | Missense Mutation | SHBG     | p.S180Y  | sex hormone-binding gl     | 97 (0.00)  | 149 (0.32) | 0.86 |
| 12-01 | Gp4 | g.chr9:91692803G>A   | Silent            | SHC3     | p.R187R  | SHC (Src homology 2 d      | 65 (0.00)  | 21 (0.43)  | 1.14 |
| 12-01 | Gp4 | g.chr19:41096189A>G  | Silent            | SHKBP1   | p.T543T  | SH3KBP1 binding prote      | 15 (0.00)  | 14 (0.64)  | 1.71 |
| 12-01 | Gp4 | g.chr17:18250870G>T  | Missense Mutation | SHMT1    | p.F153L  | serine hydroxymethyltra    | 304 (0.00) | 235 (0.17) | 0.45 |
| 12-01 | Gp4 | g.chr17:3527387G>T   | Missense Mutation | SHPK     | p.A150D  | sedoheptulokinase          | 48 (0.00)  | 129 (0.58) | 1.55 |
| 12-01 | Gp4 | g.chr3:72858192G>A   | Intron            | SHQ1     |          | SHQ1, H/ACA ribonucl       | 140 (0.00) | 51 (0.96)  | 2.56 |
| 12-01 | Gp4 | g.chr3:72872170G>A   | Intron            | SHQ1     |          | SHQ1, H/ACA ribonucl       | 40 (0.00)  | 149 (0.31) | 0.82 |
| 12-01 | Gp4 | g.chr4:77476834G>A   | Missense Mutation | SHROOM3  | p.E81K   | shroom family member       | 36 (0.00)  | 114 (0.24) | 0.63 |
| 12-01 | Gp4 | g.chrX:50378477G>T   | Missense Mutation | SHROOM4  | p.A199D  | shroom family member       | 37 (0.00)  | 23 (0.26)  | 0.43 |
| 12-01 | Gp4 | g.chr20:3674170G>T   | Silent            | SIGLEC1  | p.A1144A | sialic acid binding Ig-lik | 39 (0.00)  | 25 (0.52)  | 0.43 |
| 12-01 | Gp4 | g.chr11:111594286G>A | Silent            | SIK2     | p.Q738Q  | salt-inducible kinase 2    | 39 (0.00)  | 106 (0.21) | 0.55 |
| 12-01 | Gp4 | g.chr14:72055593A>G  | Missense Mutation | SIPA1L1  | p.D335G  | signal-induced prolifera   | 41 (0.00)  | 35 (0.29)  | 0.76 |
| 12-01 | Gp4 | g.chr19:38633254C>A  | Missense Mutation | SIPA1L3  | p.A1146E | signal-induced prolifera   | 127 (0.01) | 507 (0.15) | 0.41 |
| 12-01 | Gp4 | g.chr9:35650510C>A   | Silent            | SIT1     | p.P75P   | signaling threshold regu   | 68 (0.00)  | 87 (0.17)  | 0.46 |
| 12-01 | Gp4 | g.chr16:67979417C>A  | Nonsense Mutation | SLC12A4  | p.E963*  | solute carrier family 12   | 61 (0.00)  | 45 (0.38)  | 1.01 |
| 12-01 | Gp4 | g.chr16:67979685C>A  | Missense Mutation | SLC12A4  | p.K943N  | solute carrier family 12   | 106 (0.00) | 40 (0.68)  | 1.80 |

|       |     |                     |                   |          |          |                           |               |            |      |
|-------|-----|---------------------|-------------------|----------|----------|---------------------------|---------------|------------|------|
| 12-01 | Gp4 | g.chr5:1053510C>A   | Silent            | SLC12A7  | p.L1038L | solute carrier family 12  | 65 (0.00)     | 88 (0.41)  | 1.09 |
| 12-01 | Gp4 | g.chr17:26821068C>T | Silent            | SLC13A2  | p.I377I  | solute carrier family 13  | 42 (0.00)     | 86 (0.55)  | 1.46 |
| 12-01 | Gp4 | g.chr12:60165049G>A | Silent            | SLC16A7  | p.V89V   | solute carrier family 16  | 115 (0.00)    | 53 (0.45)  | 1.21 |
| 12-01 | Gp4 | g.chr2:113417995T>A | Missense Mutation | SLC20A1  | p.L547M  | solute carrier family 20  | 131 (0.00)    | 11 (0.45)  | 1.21 |
| 12-01 | Gp4 | g.chr3:38350536C>T  | Silent            | SLC22A14 | p.I289I  | solute carrier family 22, | 219 (0.00)    | 13 (0.85)  | 2.26 |
| 12-01 | Gp4 | g.chr17:73269562G>A | Silent            | SLC25A19 | p.H311H  | solute carrier family 25  | 50 (0.02)     | 23 (0.26)  | 0.70 |
| 12-01 | Gp4 | g.chr1:16063339T>C  | Missense Mutation | SLC25A34 | p.V120A  | solute carrier family 25, | 44 (0.02)     | 59 (0.20)  | 0.54 |
| 12-01 | Gp4 | g.chr4:186066959G>T | Missense Mutation | SLC25A4  | p.M215I  | solute carrier family 25  | 56 (0.00)     | 29 (0.97)  | 2.57 |
| 12-01 | Gp4 | g.chr17:78196544T>C | Missense Mutation | SLC26A11 | p.S109P  | solute carrier family 26  | 46 (0.02)     | 97 (0.29)  | 0.77 |
| 12-01 | Gp4 | g.chr9:131118037C>A | Missense Mutation | SLC27A4  | p.P579H  | solute carrier family 27  | 141 (0.01)    | 415 (0.16) | 0.44 |
| 12-01 | Gp4 | g.chr22:24219239G>T | Missense Mutation | SLC2A11  | p.M139I  | solute carrier family 2   | (170 (0.00)   | 183 (0.49) | 1.31 |
| 12-01 | Gp4 | g.chr1:9085105G>A   | Missense Mutation | SLC2A7   | p.T27I   | solute carrier family 2   | (125 (0.00)   | 25 (0.84)  | 2.24 |
| 12-01 | Gp4 | g.chr9:130166243C>A | Missense Mutation | SLC2A8   | p.S291R  | solute carrier family 2   | (117 (0.00)   | 24 (0.29)  | 0.78 |
| 12-01 | Gp4 | g.chr20:37353567G>T | Missense Mutation | SLC32A1  | p.G67V   | solute carrier family 32  | 57 (0.02)     | 97 (0.15)  | 0.41 |
| 12-01 | Gp4 | g.chr5:176815108C>A | Missense Mutation | SLC34A1  | p.A253D  | solute carrier family 34  | 44 (0.00)     | 12 (0.42)  | 1.11 |
| 12-01 | Gp4 | g.chr5:139947340T>C | Missense Mutation | SLC35A4  | p.C196R  | solute carrier family 35, | 105 (0.00)    | 138 (0.32) | 0.85 |
| 12-01 | Gp4 | g.chr20:44979458G>A | Silent            | SLC35C2  | p.F303F  | solute carrier family 35  | 64 (0.00)     | 52 (0.69)  | 1.85 |
| 12-01 | Gp4 | g.chr20:44979499G>A | Silent            | SLC35C2  | p.L290L  | solute carrier family 35  | 50 (0.00)     | 64 (0.73)  | 1.96 |
| 12-01 | Gp4 | g.chr5:150867733T>A | Missense Mutation | SLC36A1  | p.V450E  | solute carrier family 36  | 73 (0.00)     | 17 (0.35)  | 0.94 |
| 12-01 | Gp4 | g.chr17:79226916G>A | Silent            | SLC38A10 | p.G471G  | solute carrier family 38, | 63 (0.00)     | 93 (0.18)  | 0.49 |
| 12-01 | Gp4 | g.chr10:18284589G>A | Missense Mutation | SLC39A12 | p.S512N  | solute carrier family 39  | 48 (0.00)     | 153 (0.15) | 0.40 |
| 12-01 | Gp4 | g.chr8:145642046G>T | Missense Mutation | SLC39A4  | p.A43D   | solute carrier family 39  | 19 (0.00)     | 27 (0.59)  | 1.58 |
| 12-01 | Gp4 | g.chr3:125786883C>A | Missense Mutation | SLC41A3  | p.E60D   | solute carrier family 41, | 117 (0.00)    | 210 (0.21) | 0.56 |
| 12-01 | Gp4 | g.chr11:57268659G>T | Missense Mutation | SLC43A1  | p.R100S  | solute carrier family 43  | 20 (0.00)     | 40 (0.35)  | 0.93 |
| 12-01 | Gp4 | g.chr19:10748356G>A | Missense Mutation | SLC44A2  | p.C543Y  | solute carrier family 44  | 77 (0.01)     | 156 (0.22) | 0.58 |
| 12-01 | Gp4 | g.chr1:205633637C>A | Nonsense Mutation | SLC45A3  | p.E50*   | solute carrier family 45, | 271 (0.00)    | 365 (0.20) | 0.53 |
| 12-01 | Gp4 | g.chr8:142226039T>C | Missense Mutation | SLC45A4  | p.D536G  | solute carrier family 45, | 51 (0.00)     | 44 (0.25)  | 0.67 |
| 12-01 | Gp4 | g.chr8:142231806G>T | Silent            | SLC45A4  | p.I49I   | solute carrier family 45, | 175 (0.00)    | 199 (0.15) | 0.39 |
| 12-01 | Gp4 | g.chr17:19459328C>A | Missense Mutation | SLC47A1  | p.L269M  | solute carrier family 47  | 71 (0.00)     | 47 (0.15)  | 0.40 |
| 12-01 | Gp4 | g.chr2:162805754G>T | Missense Mutation | SLC4A10  | p.V788L  | solute carrier family 4,  | s51 (0.00)    | 30 (0.80)  | 2.13 |
| 12-01 | Gp4 | g.chr2:220501572C>A | Nonsense Mutation | SLC4A3   | p.Y837*  | solute carrier family 4   | (ε 184 (0.00) | 169 (0.33) | 0.87 |
| 12-01 | Gp4 | g.chr1:110735274C>A | Nonsense Mutation | SLC6A17  | p.S418*  | solute carrier family 6   | (t97 (0.00)   | 131 (0.19) | 0.51 |
| 12-01 | Gp4 | g.chr5:1210591G>T   | Nonsense Mutation | SLC6A19  | p.G126*  | solute carrier family 6   | (t38 (0.00)   | 27 (0.44)  | 1.19 |
| 12-01 | Gp4 | g.chr5:1443079C>A   | Silent            | SLC6A3   | p.V78V   | solute carrier family 6   | (t 111 (0.00) | 39 (0.18)  | 0.48 |
| 12-01 | Gp4 | g.chr16:87873414A>G | Missense Mutation | SLC7A5   | p.I278T  | solute carrier family 7   | (ε 52 (0.00)  | 12 (0.42)  | 0.46 |

|       |     |                      |                   |            |          |                                       |            |      |
|-------|-----|----------------------|-------------------|------------|----------|---------------------------------------|------------|------|
| 12-01 | Gp4 | g.chr2:40241136G>T   | RNA               | SLC8A1-AS1 |          | SLC8A1 antisense RNA 16 (0.00)        | 40 (0.40)  | 1.07 |
| 12-01 | Gp4 | g.chr2:103274251C>G  | Missense Mutation | SLC9A2     | p.A173G  | solute carrier family 9, s 128 (0.00) | 11 (0.91)  | 2.42 |
| 12-01 | Gp4 | g.chr5:476193G>T     | Silent            | SLC9A3     | p.I694I  | solute carrier family 9, s 48 (0.00)  | 40 (0.15)  | 0.40 |
| 12-01 | Gp4 | g.chr16:67304847G>T  | Missense Mutation | SLC9A5     | p.A809S  | solute carrier family 9, s 166 (0.00) | 279 (0.34) | 0.92 |
| 12-01 | Gp4 | g.chr20:61299469G>A  | Missense Mutation | SLCO4A1    | p.V582I  | solute carrier organic an 256 (0.00)  | 119 (0.28) | 0.74 |
| 12-01 | Gp4 | g.chr10:98819843C>G  | Splice Site       | SLIT1      |          | slit homolog 1 (Drosoph 132 (0.00)    | 125 (0.33) | 0.87 |
| 12-01 | Gp4 | g.chr16:3633274A>G   | Silent            | SLX4       | p.P1659P | SLX4 structure-specific 143 (0.00)    | 107 (0.28) | 0.75 |
| 12-01 | Gp4 | g.chr16:3639256G>T   | Silent            | SLX4       | p.A1461A | SLX4 structure-specific 30 (0.00)     | 19 (0.26)  | 0.70 |
| 12-01 | Gp4 | g.chr18:48578728C>A  | Intron            | SMAD4      |          | SMAD family member 89 (0.00)          | 18 (0.50)  | 1.33 |
| 12-01 | Gp4 | g.chr18:48589408G>T  | Intron            | SMAD4      |          | SMAD family member 55 (0.00)          | 30 (0.57)  | 1.51 |
| 12-01 | Gp4 | g.chr19:11098366C>A  | Missense Mutation | SMARCA4    | p.P295H  | SWI/SNF related, matri:29 (0.00)      | 15 (0.33)  | 0.89 |
| 12-01 | Gp4 | g.chr19:11136143C>G  | Missense Mutation | SMARCA4    | p.R1043G | SWI/SNF related, matri:44 (0.00)      | 18 (0.44)  | 1.19 |
| 12-01 | Gp4 | g.chr3:160119743G>T  | Missense Mutation | SMC4       | p.E60D   | structural maintenance c 124 (0.00)   | 144 (0.92) | 2.44 |
| 12-01 | Gp4 | g.chr17:18221307T>C  | Missense Mutation | SMCR8      | p.V735A  | Smith-Magenis syndrom 233 (0.00)      | 149 (0.19) | 0.52 |
| 12-01 | Gp4 | g.chr17:18226372G>T  | Missense Mutation | SMCR8      | p.L934F  | Smith-Magenis syndrom 63 (0.00)       | 20 (0.60)  | 1.60 |
| 12-01 | Gp4 | g.chr16:18848746C>T  | Missense Mutation | SMG1       | p.R2478K | SMG1 phosphatidylinos 102 (0.00)      | 14 (0.79)  | 2.10 |
| 12-01 | Gp4 | g.chr19:44251828G>T  | Silent            | SMG9       | p.I149I  | SMG9 nonsense mediator 22 (0.00)      | 37 (0.16)  | 0.43 |
| 12-01 | Gp4 | g.chr6:84303301G>T   | Missense Mutation | SNAP91     | p.A531D  | synaptosomal-associated 51 (0.00)     | 12 (0.50)  | 1.33 |
| 12-01 | Gp4 | g.chr9:139276382C>A  | Silent            | SNAPC4     | p.R737R  | small nuclear RNA activ 29 (0.00)     | 32 (0.19)  | 0.50 |
| 12-01 | Gp4 | g.chr17:47018391G>C  | Missense Mutation | SNF8       | p.L47V   | SNF8, ESCRT-II compl 81 (0.00)        | 32 (0.25)  | 0.67 |
| 12-01 | Gp4 | g.chr1:28909493C>A   | RNA               | SNHG12     |          | small nucleolar RNA ho 27 (0.00)      | 56 (0.14)  | 0.38 |
| 12-01 | Gp4 | g.chr15:25440150G>T  | RNA               | SNHG14     |          | small nucleolar RNA ho 124 (0.00)     | 113 (0.28) | 0.90 |
| 12-01 | Gp4 | g.chr2:27596151C>G   | Missense Mutation | SNX17      | p.F98L   | sorting nexin 17 53 (0.00)            | 52 (0.33)  | 0.87 |
| 12-01 | Gp4 | g.chr11:130784841C>A | Missense Mutation | SNX19      | p.G332C  | sorting nexin 19 108 (0.00)           | 56 (0.96)  | 2.57 |
| 12-01 | Gp4 | g.chr15:75942072A>T  | Missense Mutation | SNX33      | p.E210V  | sorting nexin 33 113 (0.00)           | 13 (0.38)  | 1.03 |
| 12-01 | Gp4 | g.chr20:35444275C>T  | Missense Mutation | SOGA1      | p.E524K  | suppressor of glucose, a 30 (0.00)    | 83 (0.14)  | 0.39 |
| 12-01 | Gp4 | g.chr20:35444293A>T  | Missense Mutation | SOGA1      | p.F518I  | suppressor of glucose, a 35 (0.00)    | 83 (0.14)  | 0.39 |
| 12-01 | Gp4 | g.chr6:127796884C>T  | Missense Mutation | SOGA3      | p.D763N  | SOGA family member 35 (0.03)          | 71 (0.55)  | 1.46 |
| 12-01 | Gp4 | g.chr21:34922829C>A  | Missense Mutation | SON        | p.P431H  | SON DNA binding prot 59 (0.00)        | 11 (0.73)  | 1.94 |
| 12-01 | Gp4 | g.chr10:97174587C>T  | Silent            | SORBS1     | p.E158E  | sorbin and SH3 domain 108 (0.00)      | 45 (0.16)  | 0.41 |
| 12-01 | Gp4 | g.chr4:7640180G>T    | Missense Mutation | SORCS2     | p.K258N  | sortilin-related VPS10 d 43 (0.00)    | 51 (0.80)  | 2.14 |
| 12-01 | Gp4 | g.chr11:121498353G>T | Missense Mutation | SORL1      | p.G1062W | sortilin-related receptor, 114 (0.00) | 50 (0.62)  | 1.65 |
| 12-01 | Gp4 | g.chr2:110373571G>A  | Missense Mutation | SOWAHC     | p.G502E  | sosondawah ankyrin rep 67 (0.00)      | 22 (0.59)  | 1.58 |
| 12-01 | Gp4 | g.chr5:157073789G>C  | Missense Mutation | SOX30      | p.R415G  | SRY (sex determining r 44 (0.00)      | 29 (0.93)  | 2.48 |
| 12-01 | Gp4 | g.chr17:45994332C>A  | Missense Mutation | SP2        | p.Q299K  | Sp2 transcription factor 145 (0.00)   | 420 (0.28) | 0.74 |

|       |     |                      |                   |           |          |                                                              |            |      |
|-------|-----|----------------------|-------------------|-----------|----------|--------------------------------------------------------------|------------|------|
| 12-01 | Gp4 | g.chr17:4863391C>A   | Missense Mutation | SPAG7     | p.D64Y   | sperm associated antigen 15 (0.00)                           | 115 (0.41) | 1.09 |
| 12-01 | Gp4 | g.chr20:48524731G>T  | Silent            | SPATA2    | p.L99L   | spermatogenesis associated 172 (0.00)                        | 514 (0.35) | 0.93 |
| 12-01 | Gp4 | g.chr9:90535414C>A   | RNA               | SPATA31C1 |          | SPATA31 subfamily C, 268 (0.00)                              | 270 (0.26) | 0.69 |
| 12-01 | Gp4 | g.chr19:11258541C>T  | Missense Mutation | SPC24     | p.S147N  | SPC24, NDC80 kinetochore 57 (0.00)                           | 26 (0.69)  | 1.85 |
| 12-01 | Gp4 | g.chr7:44042271G>A   | Silent            | SPDYE1    | p.S114S  | speedy/RINGO cell cycle 140 (0.00)                           | 272 (0.21) | 0.57 |
| 12-01 | Gp4 | g.chr7:99917286C>A   | Missense Mutation | SPDYE3    | p.P482H  | speedy/RINGO cell cycle 319 (0.00)                           | 162 (0.38) | 1.00 |
| 12-01 | Gp4 | g.chr2:220355169C>A  | Missense Mutation | SPEG      | p.A2987D | SPEG complex locus 43 (0.00)                                 | 59 (0.22)  | 0.59 |
| 12-01 | Gp4 | g.chr13:46287767C>G  | Missense Mutation | SPERT     | p.H167D  | spermatid associated 53 (0.00)                               | 75 (0.19)  | 0.50 |
| 12-01 | Gp4 | g.chr15:65256016G>T  | Missense Mutation | SPG21     | p.A264D  | spastic paraplegia 21 (at 40 (0.00)                          | 48 (0.25)  | 0.67 |
| 12-01 | Gp4 | g.chr2:228882473C>A  | Missense Mutation | SPHKAP    | p.D1033Y | SPHK1 interactor, AKA71 (0.00)                               | 15 (0.67)  | 1.78 |
| 12-01 | Gp4 | g.chr19:38774352G>T  | Missense Mutation | SPINT2    | p.Q14H   | serine peptidase inhibitor 125 (0.00)                        | 165 (0.21) | 0.55 |
| 12-01 | Gp4 | g.chr17:4435939C>A   | Silent            | SPNS2     | p.R299R  | spinster homolog 2 (Drosophila) 74 (0.00)                    | 104 (0.37) | 0.97 |
| 12-01 | Gp4 | g.chr1:32263855G>C   | Missense Mutation | SPOCD1    | p.L700V  | SPOC domain containing 55 (0.00)                             | 18 (0.28)  | 0.74 |
| 12-01 | Gp4 | g.chr4:168155202A>G  | Silent            | SPOCK3    | p.D41D   | sparc/osteonectin, connective tissue 34 (0.00)               | 47 (0.53)  | 1.42 |
| 12-01 | Gp4 | g.chr12:56863182G>C  | Missense Mutation | SPRYD4    | p.E149Q  | SPRY domain containing 113 (0.00)                            | 55 (0.51)  | 1.36 |
| 12-01 | Gp4 | g.chr12:56863233G>C  | Missense Mutation | SPRYD4    | p.D166H  | SPRY domain containing 119 (0.00)                            | 69 (0.32)  | 0.85 |
| 12-01 | Gp4 | g.chr16:1827820C>A   | Missense Mutation | SPSB3     | p.G217C  | splA/ryanodine receptor 31 (0.00)                            | 45 (0.24)  | 0.65 |
| 12-01 | Gp4 | g.chr9:131388141C>G  | Missense Mutation | SPTAN1    | p.Q2050E | spectrin, alpha, non-erythrocytic 103 (0.00)                 | 38 (0.32)  | 0.84 |
| 12-01 | Gp4 | g.chr14:65246559C>A  | Missense Mutation | SPTB      | p.D1453Y | spectrin, beta, erythrocytic 188 (0.00)                      | 265 (0.18) | 0.49 |
| 12-01 | Gp4 | g.chr14:65263308G>C  | Silent            | SPTB      | p.T436T  | spectrin, beta, erythrocytic 135 (0.00)                      | 223 (0.18) | 0.48 |
| 12-01 | Gp4 | g.chr11:66455692G>C  | Missense Mutation | SPTBN2    | p.P2108A | spectrin, beta, non-erythrocytic 37 (0.00)                   | 67 (0.31)  | 0.84 |
| 12-01 | Gp4 | g.chr11:66463814G>T  | Silent            | SPTBN2    | p.A1404A | spectrin, beta, non-erythrocytic 21 (0.00)                   | 21 (0.29)  | 0.76 |
| 12-01 | Gp4 | g.chr15:42171490C>A  | Missense Mutation | SPTBN5    | p.R1050S | spectrin, beta, non-erythrocytic 83 (0.00)                   | 84 (0.35)  | 0.92 |
| 12-01 | Gp4 | g.chr17:17720274G>T  | Silent            | SREBF1    | p.R595R  | sterol regulatory element binding protein 103 (0.00)         | 46 (0.67)  | 1.80 |
| 12-01 | Gp4 | g.chr11:126135925C>T | Silent            | SRPR      | p.V300V  | signal recognition particle 173 (0.00)                       | 50 (0.60)  | 1.60 |
| 12-01 | Gp4 | g.chr16:2812617A>G   | Silent            | SRRM2     | p.T696T  | serine/arginine repeat domain containing 110 (0.00)          | 45 (0.58)  | 1.54 |
| 12-01 | Gp4 | g.chr19:56009339G>T  | Missense Mutation | SSC5D     | p.D494Y  | scavenger receptor cysteine rich domain containing 58 (0.02) | 30 (0.43)  | 1.16 |
| 12-01 | Gp4 | g.chr19:56009353G>T  | Missense Mutation | SSC5D     | p.M498I  | scavenger receptor cysteine rich domain containing 41 (0.00) | 22 (0.23)  | 0.61 |
| 12-01 | Gp4 | g.chr2:182786713T>C  | Silent            | SSFA2     | p.S592S  | sperm specific antigen 249 (0.00)                            | 10 (0.90)  | 2.40 |
| 12-01 | Gp4 | g.chr9:140084363C>A  | Missense Mutation | SSNA1     | p.S119R  | Sjogren syndrome nucleolar protein 52 (0.02)                 | 50 (0.32)  | 0.85 |
| 12-01 | Gp4 | g.chr7:149486155G>T  | RNA               | SSPO      |          | SCO-spondin 25 (0.00)                                        | 15 (0.33)  | 0.89 |
| 12-01 | Gp4 | g.chr7:149491836G>T  | RNA               | SSPO      |          | SCO-spondin 35 (0.00)                                        | 47 (0.15)  | 0.40 |
| 12-01 | Gp4 | g.chr7:149509641G>T  | RNA               | SSPO      |          | SCO-spondin 273 (0.00)                                       | 442 (0.28) | 0.75 |
| 12-01 | Gp4 | g.chr7:149515705C>T  | RNA               | SSPO      |          | SCO-spondin 20 (0.00)                                        | 26 (0.23)  | 0.62 |
| 12-01 | Gp4 | g.chr7:149523990C>A  | RNA               | SSPO      |          | SCO-spondin 130 (0.00)                                       | 81 (0.19)  | 0.49 |

|       |     |                      |                   |           |          |                           |            |            |      |
|-------|-----|----------------------|-------------------|-----------|----------|---------------------------|------------|------------|------|
| 12-01 | Gp4 | g.chr8:134472140C>G  | Missense Mutation | ST3GAL1   | p.W297S  | ST3 beta-galactoside al   | 71 (0.00)  | 17 (0.29)  | 0.78 |
| 12-01 | Gp4 | g.chr16:70422386G>A  | Silent            | ST3GAL2   | p.F199F  | ST3 beta-galactoside al   | 42 (0.00)  | 188 (0.88) | 2.34 |
| 12-01 | Gp4 | g.chr9:130674765C>A  | Silent            | ST6GALNAC | p.L131L  | ST6 (alpha-N-acetyl-ne    | 78 (0.00)  | 121 (0.19) | 0.51 |
| 12-01 | Gp4 | g.chr3:52550388T>A   | Missense Mutation | STAB1     | p.H1387Q | stabilin 1                | 27 (0.00)  | 38 (0.18)  | 0.49 |
| 12-01 | Gp4 | g.chr12:104048393G>A | Missense Mutation | STAB2     | p.D490N  | stabilin 2                | 23 (0.00)  | 20 (0.90)  | 2.40 |
| 12-01 | Gp4 | g.chr12:57640619C>T  | Missense Mutation | STAC3     | p.E191K  | SH3 and cysteine rich d   | 220 (0.00) | 91 (0.97)  | 2.58 |
| 12-01 | Gp4 | g.chr7:99798717C>A   | Missense Mutation | STAG3     | p.S689Y  | stromal antigen 3         | 61 (0.00)  | 24 (0.29)  | 0.78 |
| 12-01 | Gp4 | g.chr7:72470019C>T   | RNA               | STAG3L3   |          | stromal antigen 3-like 3  | 24 (0.00)  | 166 (0.85) | 2.27 |
| 12-01 | Gp4 | g.chr13:33704288C>A  | Missense Mutation | STARD13   | p.G176W  | StAR-related lipid trans  | 15 (0.00)  | 32 (0.25)  | 0.67 |
| 12-01 | Gp4 | g.chrX:67941976G>T   | Missense Mutation | STARD8    | p.M849I  | StAR-related lipid trans  | 30 (0.00)  | 12 (0.92)  | 1.53 |
| 12-01 | Gp4 | g.chr2:219563523G>T  | Missense Mutation | STK36     | p.A1086S | serine/threonine kinase   | 189 (0.01) | 208 (0.23) | 0.60 |
| 12-01 | Gp4 | g.chr1:36807503C>G   | Missense Mutation | STK40     | p.E387D  | serine/threonine kinase   | 21 (0.00)  | 43 (0.33)  | 0.87 |
| 12-01 | Gp4 | g.chr11:62594833G>T  | Missense Mutation | STX5      | p.L112M  | syntaxin 5                | 222 (0.00) | 169 (0.21) | 0.57 |
| 12-01 | Gp4 | g.chr19:19414559C>T  | Silent            | SUGP1     | p.E212E  | SURP and G patch dom      | 282 (0.00) | 133 (0.55) | 1.46 |
| 12-01 | Gp4 | g.chr19:19115120G>A  | Missense Mutation | SUGP2     | p.A929V  | SURP and G patch dom      | 23 (0.00)  | 44 (0.36)  | 0.97 |
| 12-01 | Gp4 | g.chr19:19115393C>T  | Missense Mutation | SUGP2     | p.C838Y  | SURP and G patch dom      | 85 (0.00)  | 76 (0.17)  | 0.46 |
| 12-01 | Gp4 | g.chr19:19120909G>A  | Missense Mutation | SUGP2     | p.T698I  | SURP and G patch dom      | 129 (0.00) | 103 (0.19) | 0.52 |
| 12-01 | Gp4 | g.chr7:883044G>T     | Missense Mutation | SUN1      | p.G182V  | Sad1 and UNC84 domai      | 309 (0.00) | 35 (0.31)  | 0.84 |
| 12-01 | Gp4 | g.chr12:56398781G>T  | Missense Mutation | SUOX      | p.W536C  | sulfite oxidase           | 222 (0.00) | 269 (0.20) | 0.54 |
| 12-01 | Gp4 | g.chr14:21827706C>A  | Missense Mutation | SUPT16H   | p.E746D  | suppressor of Ty 16 hon   | 78 (0.00)  | 64 (0.22)  | 0.58 |
| 12-01 | Gp4 | g.chr10:70940087G>T  | Missense Mutation | SUPV3L1   | p.A14S   | suppressor of var1, 3-lik | 27 (0.00)  | 36 (0.92)  | 2.44 |
| 12-01 | Gp4 | g.chr22:24583665C>A  | Missense Mutation | SUSD2     | p.P673H  | sushi domain containing   | 86 (0.00)  | 161 (0.15) | 0.40 |
| 12-01 | Gp4 | g.chr19:55853327C>A  | Missense Mutation | SUV420H2  | p.A8E    | suppressor of variegatio  | 37 (0.00)  | 11 (0.91)  | 2.42 |
| 12-01 | Gp4 | g.chr1:149880756G>T  | Missense Mutation | SV2A      | p.T456N  | synaptic vesicle glycopr  | 142 (0.00) | 74 (0.34)  | 0.90 |
| 12-01 | Gp4 | g.chr9:113197580T>A  | Missense Mutation | SVEP1     | p.D1587V | sushi, von Willebrand f   | 40 (0.00)  | 12 (0.50)  | 1.33 |
| 12-01 | Gp4 | g.chr1:85656385C>A   | Nonsense Mutation | SYDE2     | p.E266*  | synapse defective 1, Rh   | 29 (0.00)  | 27 (0.93)  | 2.47 |
| 12-01 | Gp4 | g.chr22:32914133C>A  | Missense Mutation | SYN3      | p.G503C  | synapsin III              | 153 (0.00) | 63 (0.35)  | 0.93 |
| 12-01 | Gp4 | g.chr6:152462340G>T  | Missense Mutation | SYNE1     | p.A8415D | spectrin repeat containir | 162 (0.00) | 159 (0.35) | 0.92 |
| 12-01 | Gp4 | g.chr6:152757094T>C  | Missense Mutation | SYNE1     | p.E1431G | spectrin repeat containir | 21 (0.00)  | 15 (0.53)  | 1.42 |
| 12-01 | Gp4 | g.chr14:64470001C>T  | Silent            | SYNE2     | p.I1450I | spectrin repeat containir | 15 (0.00)  | 36 (0.22)  | 0.59 |
| 12-01 | Gp4 | g.chr14:64679535C>T  | Nonsense Mutation | SYNE2     | p.Q6249* | spectrin repeat containir | 44 (0.00)  | 97 (0.22)  | 0.58 |
| 12-01 | Gp4 | g.chr14:95884178G>T  | Silent            | SYNE3     | p.G971G  | spectrin repeat containir | 227 (0.00) | 137 (0.68) | 1.81 |
| 12-01 | Gp4 | g.chr19:48879348C>A  | Missense Mutation | SYNGR4    | p.Q160K  | synaptogyrin 4            | 42 (0.00)  | 13 (0.85)  | 2.26 |
| 12-01 | Gp4 | g.chr5:150027979C>A  | Silent            | SYNPO     | p.R48R   | synaptopodin              | 200 (0.01) | 54 (0.15)  | 0.40 |
| 12-01 | Gp4 | g.chr10:75406933C>A  | Missense Mutation | SYNPO2L   | p.R826L  | synaptopodin 2-like       | 72 (0.00)  | 50 (0.16)  | 0.43 |

|       |     |                      |                   |          |          |                            |             |            |      |
|-------|-----|----------------------|-------------------|----------|----------|----------------------------|-------------|------------|------|
| 12-01 | Gp4 | g.chr10:75413315T>C  | Silent            | SYNPO2L  | p.P118P  | synaptopodin 2-like        | 72 (0.00)   | 78 (0.37)  | 0.99 |
| 12-01 | Gp4 | g.chr19:55687401G>T  | Missense Mutation | SYT5     | p.S115Y  | synaptotagmin V            | 280 (0.00)  | 284 (0.54) | 1.45 |
| 12-01 | Gp4 | g.chr11:61290697C>T  | Silent            | SYT7     | p.K363K  | synaptotagmin VII          | 78 (0.00)   | 175 (0.27) | 0.72 |
| 12-01 | Gp4 | g.chr6:166580079C>T  | Splice Site       | T        |          | T, brachyury homolog (t    | 147 (0.00)  | 123 (0.33) | 0.87 |
| 12-01 | Gp4 | g.chr10:123843705G>T | Missense Mutation | TACC2    | p.V564L  | transforming, acidic coil  | 108 (0.00)  | 132 (0.45) | 1.21 |
| 12-01 | Gp4 | g.chr17:35837040A>G  | Missense Mutation | TADA2A   | p.K429E  | transcriptional adaptor    | 2171 (0.00) | 131 (0.99) | 2.65 |
| 12-01 | Gp4 | g.chr4:7056437G>C    | Missense Mutation | TADA2B   | p.E307Q  | transcriptional adaptor    | 283 (0.00)  | 169 (0.22) | 0.60 |
| 12-01 | Gp4 | g.chr9:32635219C>A   | Missense Mutation | TAF1L    | p.S120I  | TAF1 RNA polymerase        | 145 (0.00)  | 92 (0.67)  | 1.80 |
| 12-01 | Gp4 | g.chr11:62553754C>T  | Missense Mutation | TAF6L    | p.P328L  | TAF6-like RNA polymε       | 49 (0.00)   | 38 (0.74)  | 1.96 |
| 12-01 | Gp4 | g.chr17:27844560A>G  | Silent            | TAOK1    | p.E598E  | TAO kinase 1               | 175 (0.00)  | 75 (0.57)  | 1.53 |
| 12-01 | Gp4 | g.chr12:6566867C>A   | Missense Mutation | TAPBPL   | p.L169I  | TAP binding protein-lik    | 54 (0.00)   | 196 (0.26) | 0.68 |
| 12-01 | Gp4 | g.chr7:141491011C>A  | Missense Mutation | TAS2R5   | p.Q284K  | taste receptor, type 2, m  | 154 (0.00)  | 48 (0.52)  | 1.39 |
| 12-01 | Gp4 | g.chr4:7026857C>A    | Missense Mutation | TBC1D14  | p.D400E  | TBC1 domain family, nr     | 128 (0.00)  | 255 (0.36) | 0.97 |
| 12-01 | Gp4 | g.chr19:50381797G>T  | Nonsense Mutation | TBC1D17  | p.G55*   | TBC1 domain family, nr     | 111 (0.01)  | 71 (0.35)  | 0.94 |
| 12-01 | Gp4 | g.chr9:100995760G>T  | Missense Mutation | TBC1D2   | p.S240Y  | TBC1 domain family, nr     | 111 (0.00)  | 173 (0.17) | 0.45 |
| 12-01 | Gp4 | g.chr15:74177361C>A  | Missense Mutation | TBC1D21  | p.H130N  | TBC1 domain family, nr     | 89 (0.00)   | 26 (0.73)  | 1.95 |
| 12-01 | Gp4 | g.chr22:47287201C>A  | Missense Mutation | TBC1D22A | p.L250I  | TBC1 domain family, nr     | 198 (0.00)  | 125 (0.46) | 1.22 |
| 12-01 | Gp4 | g.chr2:101645961G>A  | Silent            | TBC1D8   | p.I723I  | TBC1 domain family, nr     | 63 (0.00)   | 48 (0.50)  | 1.33 |
| 12-01 | Gp4 | g.chr5:179296817C>G  | Missense Mutation | TBC1D9B  | p.D915H  | TBC1 domain family, nr     | 23 (0.00)   | 70 (0.14)  | 0.38 |
| 12-01 | Gp4 | g.chr5:179315177G>A  | Missense Mutation | TBC1D9B  | p.L394F  | TBC1 domain family, nr     | 132 (0.00)  | 154 (0.18) | 0.48 |
| 12-01 | Gp4 | g.chr17:80758753C>A  | Silent            | TBCD     | p.L277L  | tubulin folding cofactor   | 20 (0.00)   | 124 (0.15) | 0.41 |
| 12-01 | Gp4 | g.chr7:45145349C>G   | Missense Mutation | TBRG4    | p.W142C  | transforming growth fac    | 33 (0.00)   | 98 (0.81)  | 2.15 |
| 12-01 | Gp4 | g.chr17:59557490G>T  | Missense Mutation | TBX4     | p.Q277H  | T-box 4                    | 49 (0.00)   | 27 (0.44)  | 1.19 |
| 12-01 | Gp4 | g.chr17:59557531G>T  | Missense Mutation | TBX4     | p.G291V  | T-box 4                    | 49 (0.00)   | 26 (0.54)  | 1.44 |
| 12-01 | Gp4 | g.chr17:59560397G>A  | Silent            | TBX4     | p.V386V  | T-box 4                    | 51 (0.02)   | 22 (0.95)  | 2.55 |
| 12-01 | Gp4 | g.chrX:102529116C>T  | Missense Mutation | TCEAL5   | p.D126N  | transcription elongation   | 67 (0.00)   | 20 (0.40)  | 0.48 |
| 12-01 | Gp4 | g.chr12:110353212C>G | Missense Mutation | TCHP     | p.A442G  | trichoplein, keratin filan | 142 (0.00)  | 38 (0.18)  | 0.49 |
| 12-01 | Gp4 | g.chr6:170151519G>T  | Silent            | TCTE3    | p.P12P   | t-complex-associated-te:   | 36 (0.00)   | 277 (0.51) | 1.35 |
| 12-01 | Gp4 | g.chr19:33229899G>A  | Splice Site       | TDRD12   |          | tudor domain containing    | 77 (0.00)   | 173 (0.16) | 0.42 |
| 12-01 | Gp4 | g.chr6:46660550G>T   | Missense Mutation | TDRD6    | p.R1562I | tudor domain containing    | 55 (0.00)   | 21 (0.33)  | 0.89 |
| 12-01 | Gp4 | g.chr6:35447084G>T   | Missense Mutation | TEAD3    | p.L54M   | TEA domain family me:      | 107 (0.00)  | 104 (0.20) | 0.54 |
| 12-01 | Gp4 | g.chr7:97874210G>T   | Missense Mutation | TECPR1   | p.P132H  | tectonin beta-propeller r  | 86 (0.00)   | 121 (0.21) | 0.57 |
| 12-01 | Gp4 | g.chr14:102901309G>T | Missense Mutation | TECPR2   | p.G719W  | tectonin beta-propeller r  | 31 (0.00)   | 39 (0.31)  | 0.82 |
| 12-01 | Gp4 | g.chr1:36552559C>A   | Missense Mutation | TEKT2    | p.D220E  | tektin 2 (testicular)      | 126 (0.00)  | 41 (0.41)  | 1.11 |
| 12-01 | Gp4 | g.chrX:123554640C>A  | Missense Mutation | TENM1    | p.M1494I | teneurin transmembrane     | 41 (0.00)   | 15 (0.33)  | 0.56 |

|       |     |                     |                   |          |          |                                   |            |            |      |
|-------|-----|---------------------|-------------------|----------|----------|-----------------------------------|------------|------------|------|
| 12-01 | Gp4 | g.chr5:167671452G>A | Missense Mutation | TENM2    | p.D1611N | teneurin transmembrane 119 (0.00) | 159 (0.45) | 1.21       |      |
| 12-01 | Gp4 | g.chr11:78433797G>T | Missense Mutation | TENM4    | p.S1239Y | teneurin transmembrane 277 (0.00) | 47 (0.26)  | 0.68       |      |
| 12-01 | Gp4 | g.chr11:78574162C>G | Missense Mutation | TENM4    | p.G367A  | teneurin transmembrane 89 (0.00)  | 13 (0.38)  | 1.03       |      |
| 12-01 | Gp4 | g.chr9:35608178G>T  | Missense Mutation | TESK1    | p.A273S  | testis-specific kinase 1          | 108 (0.01) | 40 (0.57)  | 1.53 |
| 12-01 | Gp4 | g.chr1:45810693G>T  | Missense Mutation | TESK2    | p.A512D  | testis-specific kinase 2          | 201 (0.00) | 55 (0.18)  | 0.48 |
| 12-01 | Gp4 | g.chr2:74274626C>G  | Missense Mutation | TET3     | p.L393V  | tet methylcytosine dioxy          | 175 (0.00) | 87 (0.63)  | 1.69 |
| 12-01 | Gp4 | g.chr9:103092418T>G | Silent            | TEX10    | p.I428I  | testis expressed 10               | 18 (0.00)  | 18 (0.94)  | 2.52 |
| 12-01 | Gp4 | g.chr17:56676237C>A | Splice Site       | TEX14    | p.M829I  | testis expressed 14               | 47 (0.00)  | 310 (0.97) | 2.59 |
| 12-01 | Gp4 | g.chr6:50791197C>G  | Missense Mutation | TFAP2B   | p.S53R   | transcription factor AP-2         | 20 (0.00)  | 30 (0.83)  | 2.22 |
| 12-01 | Gp4 | g.chr2:122038798G>T | Missense Mutation | TFCP2L1  | p.P38T   | transcription factor CP2          | 85 (0.00)  | 61 (0.36)  | 0.96 |
| 12-01 | Gp4 | g.chr8:133995605T>A | Missense Mutation | TG       | p.N2070K | thyroglobulin                     | 200 (0.00) | 90 (0.33)  | 0.89 |
| 12-01 | Gp4 | g.chr14:24724386C>G | Silent            | TGM1     | p.R573R  | transglutaminase 1                | 141 (0.00) | 331 (0.27) | 0.73 |
| 12-01 | Gp4 | g.chr15:43568733G>T | Missense Mutation | TGM7     | p.Q685K  | transglutaminase 7                | 174 (0.00) | 486 (0.69) | 1.83 |
| 12-01 | Gp4 | g.chr15:43574785G>A | Silent            | TGM7     | p.I346I  | transglutaminase 7                | 29 (0.00)  | 23 (0.39)  | 1.04 |
| 12-01 | Gp4 | g.chr15:43579606T>C | Missense Mutation | TGM7     | p.D246G  | transglutaminase 7                | 63 (0.00)  | 86 (0.34)  | 0.90 |
| 12-01 | Gp4 | g.chr16:67877401G>T | Nonstop Mutation  | THAP11   | p.*315L  | THAP domain containir             | 124 (0.00) | 101 (0.19) | 0.50 |
| 12-01 | Gp4 | g.chr1:155172743C>A | Nonsense Mutation | THBS3    | p.E273*  | thrombospondin 3                  | 61 (0.00)  | 37 (0.81)  | 2.16 |
| 12-01 | Gp4 | g.chr5:79355571C>T  | Missense Mutation | THBS4    | p.P186L  | thrombospondin 4                  | 193 (0.01) | 43 (0.44)  | 1.18 |
| 12-01 | Gp4 | g.chr5:79372787G>T  | Missense Mutation | THBS4    | p.D577Y  | thrombospondin 4                  | 184 (0.00) | 38 (0.84)  | 2.25 |
| 12-01 | Gp4 | g.chr1:36758270C>A  | Missense Mutation | THRAP3   | p.Q664K  | thyroid hormone receptc           | 89 (0.00)  | 16 (0.50)  | 1.33 |
| 12-01 | Gp4 | g.chr7:11452317G>T  | Missense Mutation | THSD7A   | p.N1216K | thrombospondin, type I,           | 85 (0.00)  | 22 (0.32)  | 0.85 |
| 12-01 | Gp4 | g.chr6:155451381C>A | Missense Mutation | TIAM2    | p.P342T  | T-cell lymphoma invasi            | 101 (0.00) | 29 (0.38)  | 1.01 |
| 12-01 | Gp4 | g.chr6:155490003G>A | Missense Mutation | TIAM2    | p.G108R  | T-cell lymphoma invasi            | 36 (0.03)  | 140 (0.92) | 2.46 |
| 12-01 | Gp4 | g.chr6:155490004G>A | Missense Mutation | TIAM2    | p.G108E  | T-cell lymphoma invasi            | 36 (0.03)  | 139 (0.93) | 2.47 |
| 12-01 | Gp4 | g.chr19:4817417G>T  | Missense Mutation | TICAM1   | p.P325T  | toll-like receptor adapto         | 140 (0.00) | 58 (0.19)  | 0.51 |
| 12-01 | Gp4 | g.chr1:43777670C>A  | Missense Mutation | TIE1     | p.P500T  | tyrosine kinase with imr          | 281 (0.00) | 480 (0.30) | 0.79 |
| 12-01 | Gp4 | g.chr12:56818695A>T | Missense Mutation | TIMELESS | p.N573K  | timeless circadian clock          | 126 (0.00) | 18 (0.39)  | 1.04 |
| 12-01 | Gp4 | g.chr14:24711434C>A | Silent            | TINF2    | p.L35L   | TERF1 (TRF1)-interacti            | 136 (0.00) | 202 (0.19) | 0.50 |
| 12-01 | Gp4 | g.chr1:168160676G>A | Missense Mutation | TIPRL    | p.E152K  | TOR signaling pathway             | 96 (0.00)  | 28 (0.68)  | 1.81 |
| 12-01 | Gp4 | g.chr3:53263048G>A  | Missense Mutation | TKT      | p.A457V  | transketolase                     | 111 (0.00) | 35 (0.43)  | 1.14 |
| 12-01 | Gp4 | g.chr20:35517694G>A | Missense Mutation | TLDC2    | p.G185R  | TBC/LysM-associated d             | 210 (0.00) | 156 (0.22) | 0.58 |
| 12-01 | Gp4 | g.chr19:2991967C>T  | Silent            | TLE6     | p.Y457Y  | transducin-like enhance           | 167 (0.01) | 74 (0.70)  | 1.87 |
| 12-01 | Gp4 | g.chr9:35698141G>T  | Nonsense Mutation | TLN1     | p.S2467* | talin 1                           | 236 (0.00) | 149 (0.72) | 1.91 |
| 12-01 | Gp4 | g.chr9:35712840G>C  | Missense Mutation | TLN1     | p.L1185V | talin 1                           | 19 (0.00)  | 10 (0.80)  | 2.13 |
| 12-01 | Gp4 | g.chr3:52256600G>T  | Missense Mutation | TLR9     | p.A731E  | toll-like receptor 9              | 42 (0.00)  | 84 (0.19)  | 0.51 |



|       |     |                      |                   |          |         |                                          |            |      |
|-------|-----|----------------------|-------------------|----------|---------|------------------------------------------|------------|------|
| 12-01 | Gp4 | g.chr1:62190904A>T   | Silent            | TM2D1    | p.T25T  | TM2 domain containing 70 (0.00)          | 25 (0.40)  | 1.07 |
| 12-01 | Gp4 | g.chr14:24658665G>T  | Missense Mutation | TM9SF1   | p.L802I | transmembrane 9 superf 202 (0.00)        | 34 (0.62)  | 1.65 |
| 12-01 | Gp4 | g.chr14:24664063G>A  | Missense Mutation | TM9SF1   | p.P264S | transmembrane 9 superf 237 (0.00)        | 17 (0.59)  | 1.57 |
| 12-01 | Gp4 | g.chr19:54669202C>A  | Missense Mutation | TMC4     | p.G305V | transmembrane channel 28 (0.00)          | 42 (0.31)  | 0.83 |
| 12-01 | Gp4 | g.chr17:79287656C>A  | Missense Mutation | TMEM105  | p.R62L  | transmembrane protein 53 (0.00)          | 46 (0.15)  | 0.41 |
| 12-01 | Gp4 | g.chr7:75617499C>A   | RNA               | TMEM120A |         | transmembrane protein 81 (0.00)          | 141 (0.50) | 1.32 |
| 12-01 | Gp4 | g.chr11:102272666A>T | Silent            | TMEM123  | p.S143S | transmembrane protein 35 (0.00)          | 97 (0.58)  | 1.54 |
| 12-01 | Gp4 | g.chr11:60698013G>T  | Missense Mutation | TMEM132A | p.A300S | transmembrane protein 204 (0.00)         | 178 (0.34) | 0.90 |
| 12-01 | Gp4 | g.chr11:60703337A>G  | Splice Site       | TMEM132A | p.E678G | transmembrane protein 206 (0.00)         | 107 (0.31) | 0.82 |
| 12-01 | Gp4 | g.chr17:32964330C>A  | Silent            | TMEM132E | p.A678A | transmembrane protein 80 (0.00)          | 243 (0.29) | 0.78 |
| 12-01 | Gp4 | g.chr11:87020584A>G  | Missense Mutation | TMEM135  | p.Q269R | transmembrane protein 70 (0.00)          | 34 (0.24)  | 0.63 |
| 12-01 | Gp4 | g.chr7:134849514C>G  | Missense Mutation | TMEM140  | p.N107K | transmembrane protein 41 (0.00)          | 21 (0.57)  | 1.52 |
| 12-01 | Gp4 | g.chr19:36037587C>A  | Missense Mutation | TMEM147  | p.A74D  | transmembrane protein 85 (0.00)          | 81 (0.27)  | 0.72 |
| 12-01 | Gp4 | g.chr19:36037641C>A  | Missense Mutation | TMEM147  | p.A92D  | transmembrane protein 93 (0.01)          | 65 (0.23)  | 0.62 |
| 12-01 | Gp4 | g.chr4:944275A>G     | Missense Mutation | TMEM175  | p.I87V  | transmembrane protein 50 (0.00)          | 14 (0.43)  | 1.14 |
| 12-01 | Gp4 | g.chr1:202989937G>T  | Missense Mutation | TMEM183A | p.S269I | transmembrane protein 34 (0.00)          | 12 (0.58)  | 1.56 |
| 12-01 | Gp4 | g.chr18:5891696C>T   | Missense Mutation | TMEM200C | p.V123I | transmembrane protein 93 (0.00)          | 160 (0.77) | 2.05 |
| 12-01 | Gp4 | g.chr3:190159255C>A  | Missense Mutation | TMEM207  | p.D44Y  | transmembrane protein 15 (0.00)          | 93 (0.38)  | 1.00 |
| 12-01 | Gp4 | g.chr2:27262658C>A   | Missense Mutation | TMEM214  | p.S525R | transmembrane protein 132 (0.00)         | 182 (0.22) | 0.59 |
| 12-01 | Gp4 | g.chr1:27660546G>C   | Splice Site       | TMEM222  |         | transmembrane protein 126 (0.00)         | 13 (0.62)  | 1.64 |
| 12-01 | Gp4 | g.chr9:104239212G>T  | Missense Mutation | TMEM246  | p.H55N  | transmembrane protein 83 (0.00)          | 99 (0.20)  | 0.54 |
| 12-01 | Gp4 | g.chr3:12783999C>T   | Silent            | TMEM40   | p.G103G | transmembrane protein 211 (0.00)         | 406 (0.24) | 0.65 |
| 12-01 | Gp4 | g.chr3:14183207G>A   | Missense Mutation | TMEM43   | p.R372Q | transmembrane protein 22 (0.00)          | 24 (0.21)  | 0.56 |
| 12-01 | Gp4 | g.chr3:194344317G>T  | Missense Mutation | TMEM44   | p.P156T | transmembrane protein 89 (0.00)          | 117 (0.21) | 0.55 |
| 12-01 | Gp4 | g.chr1:55451911C>A   | Missense Mutation | TMEM61   | p.P53T  | transmembrane protein 78 (0.00)          | 50 (0.52)  | 1.39 |
| 12-01 | Gp4 | g.chr1:226034855C>G  | Missense Mutation | TMEM63A  | p.Q770H | transmembrane protein 57 (0.00)          | 43 (0.19)  | 0.50 |
| 12-01 | Gp4 | g.chr3:48658434G>A   | Silent            | TMEM89   | p.C107C | transmembrane protein 60 (0.00)          | 54 (0.19)  | 0.49 |
| 12-01 | Gp4 | g.chr21:42840264C>A  | Intron            | TMPRSS2  |         | transmembrane protease 102 (0.00)        | 13 (0.77)  | 2.05 |
| 12-01 | Gp4 | g.chr21:42850217C>A  | Intron            | TMPRSS2  |         | transmembrane protease 16 (0.00)         | 19 (0.68)  | 1.82 |
| 12-01 | Gp4 | g.chr21:42862098C>A  | Intron            | TMPRSS2  |         | transmembrane protease 82 (0.00)         | 35 (0.97)  | 2.59 |
| 12-01 | Gp4 | g.chrX:12994920G>A   | Missense Mutation | TMSB4X   | p.G42D  | thymosin beta 4, X-linked 118 (0.00)     | 282 (0.46) | 0.77 |
| 12-01 | Gp4 | g.chr1:2494682C>A    | Silent            | TNFRSF14 | p.P274P | tumor necrosis factor receptor 26 (0.00) | 40 (0.28)  | 0.73 |
| 12-01 | Gp4 | g.chr4:2749410C>A    | Missense Mutation | TNIP2    | p.R180M | TNFAIP3 interacting protein 238 (0.00)   | 625 (0.35) | 0.93 |
| 12-01 | Gp4 | g.chr17:7286754G>T   | Missense Mutation | TNK1     | p.G82V  | tyrosine kinase, non-receptor 55 (0.00)  | 63 (0.17)  | 0.47 |
| 12-01 | Gp4 | g.chr17:7287096C>A   | Missense Mutation | TNK1     | p.F165L | tyrosine kinase, non-receptor 53 (0.00)  | 14 (0.57)  | 1.52 |

|       |     |                      |                   |          |          |                            |            |            |      |
|-------|-----|----------------------|-------------------|----------|----------|----------------------------|------------|------------|------|
| 12-01 | Gp4 | g.chr11:57076997C>A  | Missense Mutation | TNKS1BP1 | p.R1063I | tankyrase 1 binding prot   | 49 (0.00)  | 57 (0.18)  | 0.47 |
| 12-01 | Gp4 | g.chr19:12830080G>T  | Nonsense Mutation | TNPO2    | p.S57*   | transportin 2              | 62 (0.00)  | 53 (0.68)  | 1.81 |
| 12-01 | Gp4 | g.chr7:5396764G>T    | Missense Mutation | TNRC18   | p.S1659R | trinucleotide repeat cont  | 73 (0.00)  | 22 (0.23)  | 0.61 |
| 12-01 | Gp4 | g.chr22:40658175C>T  | Missense Mutation | TNRC6B   | p.P188L  | trinucleotide repeat cont  | 31 (0.00)  | 19 (0.26)  | 0.70 |
| 12-01 | Gp4 | g.chr2:218713744G>A  | Missense Mutation | TNS1     | p.S374F  | tensin 1                   | 51 (0.02)  | 269 (0.24) | 0.63 |
| 12-01 | Gp4 | g.chr17:38635997G>T  | Silent            | TNS4     | p.I613I  | tensin 4                   | 130 (0.00) | 134 (0.14) | 0.38 |
| 12-01 | Gp4 | g.chr8:145659074G>A  | Silent            | TONSL    | p.L1152L | tonsoku-like, DNA repa     | 42 (0.00)  | 100 (0.79) | 2.11 |
| 12-01 | Gp4 | g.chr8:145664071G>T  | Missense Mutation | TONSL    | p.L510I  | tonsoku-like, DNA repa     | 21 (0.00)  | 44 (0.27)  | 0.73 |
| 12-01 | Gp4 | g.chr8:145665733C>A  | Splice Site       | TONSL    |          | tonsoku-like, DNA repa     | 48 (0.00)  | 222 (0.23) | 0.61 |
| 12-01 | Gp4 | g.chr8:144407700G>T  | Missense Mutation | TOP1MT   | p.L65I   | topoisomerase (DNA) I,     | 54 (0.00)  | 54 (0.39)  | 1.04 |
| 12-01 | Gp4 | g.chr17:7578488C>A   | Missense Mutation | TP53     | p.D148Y  | tumor protein p53          | 89 (0.00)  | 110 (0.70) | 1.87 |
| 12-01 | Gp4 | g.chr17:27898875C>A  | Splice Site       | TP53I13  | p.P105T  | tumor protein p53 induc    | 90 (0.00)  | 13 (0.62)  | 1.64 |
| 12-01 | Gp4 | g.chr2:24300466G>T   | Missense Mutation | TP53I3   | p.L328M  | tumor protein p53 induc    | 47 (0.00)  | 79 (0.27)  | 0.71 |
| 12-01 | Gp4 | g.chr12:113711392G>T | Missense Mutation | TPCN1    | p.M219I  | two pore segment chann     | 177 (0.00) | 102 (0.46) | 1.23 |
| 12-01 | Gp4 | g.chr9:6328623G>A    | Missense Mutation | TPD52L3  | p.V10M   | tumor protein D52-like     | 113 (0.00) | 100 (0.16) | 0.43 |
| 12-01 | Gp4 | g.chr9:35685671G>T   | Missense Mutation | TPM2     | p.A116D  | tropomyosin 2 (beta)       | 93 (0.01)  | 91 (0.18)  | 0.47 |
| 12-01 | Gp4 | g.chr14:23020638T>C  | RNA               | TRAC     |          | T cell receptor alpha cor  | 254 (0.00) | 42 (0.90)  | 2.41 |
| 12-01 | Gp4 | g.chr9:123675765C>A  | Missense Mutation | TRAF1    | p.M182I  | TNF receptor-associatec    | 45 (0.00)  | 286 (0.14) | 0.38 |
| 12-01 | Gp4 | g.chr3:36875170C>G   | Silent            | TRANK1   | p.L1374L | tetratricopeptide repeat   | 165 (0.00) | 20 (0.50)  | 1.33 |
| 12-01 | Gp4 | g.chr14:22090576C>T  | RNA               | TRAV1-1  |          | T cell receptor alpha var  | 92 (0.00)  | 195 (0.59) | 1.59 |
| 12-01 | Gp4 | g.chr7:142499076C>A  | RNA               | TRBC2    |          | T cell receptor beta cons  | 72 (0.00)  | 42 (0.31)  | 0.83 |
| 12-01 | Gp4 | g.chr7:38299670C>A   | RNA               | TRGC1    |          | T cell receptor gamma c    | 62 (0.00)  | 45 (0.22)  | 0.59 |
| 12-01 | Gp4 | g.chr2:12880850C>T   | Missense Mutation | TRIB2    | p.A321V  | tribbles pseudokinase 2    | 134 (0.00) | 78 (0.22)  | 0.58 |
| 12-01 | Gp4 | g.chr17:18638680C>A  | Missense Mutation | TRIM16L  | p.F318L  | tripartite motif containir | 56 (0.00)  | 71 (0.15)  | 0.41 |
| 12-01 | Gp4 | g.chr11:6477701G>T   | Missense Mutation | TRIM3    | p.L419M  | tripartite motif containir | 28 (0.00)  | 26 (0.19)  | 0.51 |
| 12-01 | Gp4 | g.chr15:45059829G>A  | Silent            | TRIM69   | p.L454L  | tripartite motif containir | 20 (0.00)  | 111 (0.96) | 2.57 |
| 12-01 | Gp4 | g.chr3:32931860G>A   | Silent            | TRIM71   | p.K388K  | tripartite motif containir | 283 (0.00) | 260 (0.22) | 0.57 |
| 12-01 | Gp4 | g.chr7:72430629C>G   | Missense Mutation | TRIM74   | p.G217R  | tripartite motif containir | 95 (0.00)  | 44 (0.59)  | 1.58 |
| 12-01 | Gp4 | g.chr2:230679838C>A  | Missense Mutation | TRIP12   | p.A225S  | thyroid hormone receptc    | 26 (0.00)  | 21 (0.90)  | 2.41 |
| 12-01 | Gp4 | g.chr7:100466183C>A  | Missense Mutation | TRIP6    | p.L144I  | thyroid hormone receptc    | 27 (0.00)  | 35 (0.17)  | 0.46 |
| 12-01 | Gp4 | g.chr22:20100285C>A  | Missense Mutation | TRMT2A   | p.G560V  | tRNA methyltransferase     | 46 (0.00)  | 42 (0.38)  | 1.02 |
| 12-01 | Gp4 | g.chr22:20103951G>A  | Missense Mutation | TRMT2A   | p.S70F   | tRNA methyltransferase     | 29 (0.00)  | 33 (0.97)  | 2.59 |
| 12-01 | Gp4 | g.chr12:49719581G>T  | Missense Mutation | TROAP    | p.D183Y  | trophinin associated pro   | 108 (0.00) | 81 (0.36)  | 0.95 |
| 12-01 | Gp4 | g.chr20:33594373G>A  | Silent            | TRPC4AP  | p.I564I  | transient receptor potent  | 32 (0.00)  | 30 (0.33)  | 0.89 |
| 12-01 | Gp4 | g.chr21:45795880G>T  | Missense Mutation | TRPM2    | p.Q312H  | transient receptor potent  | 143 (0.00) | 243 (0.14) | 0.38 |

|       |     |                      |                   |          |           |                             |            |            |      |
|-------|-----|----------------------|-------------------|----------|-----------|-----------------------------|------------|------------|------|
| 12-01 | Gp4 | g.chr7:142571225C>A  | Missense Mutation | TRPV6    | p.E588D   | transient receptor potent   | 159 (0.00) | 164 (0.35) | 0.94 |
| 12-01 | Gp4 | g.chr7:98558953G>T   | Missense Mutation | TRRAP    | p.V2161F  | transformation/transcrip    | 63 (0.00)  | 16 (0.38)  | 1.00 |
| 12-01 | Gp4 | g.chr7:98567749G>T   | Silent            | TRRAP    | p.V2484V  | transformation/transcrip    | 76 (0.00)  | 88 (0.35)  | 0.94 |
| 12-01 | Gp4 | g.chr7:98608756C>A   | Missense Mutation | TRRAP    | p.P3649T  | transformation/transcrip    | 32 (0.00)  | 122 (0.35) | 0.94 |
| 12-01 | Gp4 | g.chr3:150128183C>A  | Missense Mutation | TSC22D2  | p.P349H   | TSC22 domain family, 121    | (0.00)     | 25 (0.20)  | 0.53 |
| 12-01 | Gp4 | g.chrX:107018425C>A  | Missense Mutation | TSC22D3  | p.E75D    | TSC22 domain family, 1222   | (0.00)     | 76 (0.43)  | 0.52 |
| 12-01 | Gp4 | g.chr11:65714762G>A  | RNA               | TSGA10IP |           | testis specific, 10 interac | 26 (0.00)  | 164 (0.18) | 0.47 |
| 12-01 | Gp4 | g.chr18:72999314A>G  | Missense Mutation | TSHZ1    | p.N651S   | teashirt zinc finger hom    | 98 (0.00)  | 78 (0.18)  | 0.63 |
| 12-01 | Gp4 | g.chr19:31770017C>G  | Missense Mutation | TSHZ3    | p.E228Q   | teashirt zinc finger hom    | 398 (0.00) | 207 (0.46) | 1.22 |
| 12-01 | Gp4 | g.chr17:79612084C>A  | RNA               | TSPAN10  |           | tetraspanin 10              | 15 (0.00)  | 93 (0.31)  | 0.83 |
| 12-01 | Gp4 | g.chr12:31116942G>T  | Missense Mutation | TSPAN11  | p.C89F    | tetraspanin 11              | 26 (0.00)  | 24 (0.54)  | 1.44 |
| 12-01 | Gp4 | g.chr5:176083945T>C  | Missense Mutation | TSPAN17  | p.V246A   | tetraspanin 17              | 34 (0.00)  | 16 (0.81)  | 2.17 |
| 12-01 | Gp4 | g.chr11:44931363C>A  | Silent            | TSPAN18  | p.I57I    | tetraspanin 18              | 155 (0.00) | 177 (0.28) | 0.74 |
| 12-01 | Gp4 | g.chr12:3389617C>A   | Missense Mutation | TSPAN9   | p.L134M   | tetraspanin 9               | 15 (0.00)  | 229 (0.17) | 0.44 |
| 12-01 | Gp4 | g.chr8:98289446C>A   | Missense Mutation | TSPYL5   | p.Q209H   | TSPY-like 5                 | 153 (0.01) | 57 (0.61)  | 1.64 |
| 12-01 | Gp4 | g.chr8:98289625G>T   | Missense Mutation | TSPYL5   | p.P150T   | TSPY-like 5                 | 25 (0.04)  | 23 (0.30)  | 0.81 |
| 12-01 | Gp4 | g.chr22:19119448C>A  | Missense Mutation | TSSK2    | p.A179E   | testis-specific serine kin  | 187 (0.00) | 83 (0.94)  | 2.51 |
| 12-01 | Gp4 | g.chr6:43220530G>T   | Silent            | TTBK1    | p.L3L     | tau tubulin kinase 1        | 41 (0.00)  | 17 (0.76)  | 2.04 |
| 12-01 | Gp4 | g.chr6:43230717G>T   | Missense Mutation | TTBK1    | p.D488Y   | tau tubulin kinase 1        | 23 (0.00)  | 44 (0.16)  | 0.42 |
| 12-01 | Gp4 | g.chr1:231060705C>T  | Missense Mutation | TTC13    | p.A535T   | tetratricopeptide repeat    | 240 (0.00) | 94 (0.37)  | 0.99 |
| 12-01 | Gp4 | g.chr9:130478437G>T  | Missense Mutation | TTC16    | p.D5Y     | tetratricopeptide repeat    | 44 (0.00)  | 63 (0.21)  | 0.55 |
| 12-01 | Gp4 | g.chr9:130485499G>T  | Missense Mutation | TTC16    | p.Q253H   | tetratricopeptide repeat    | 29 (0.00)  | 63 (0.35)  | 0.93 |
| 12-01 | Gp4 | g.chr3:39180080A>G   | Missense Mutation | TTC21A   | p.K1284R  | tetratricopeptide repeat    | 145 (0.00) | 163 (0.20) | 0.54 |
| 12-01 | Gp4 | g.chr22:28504121T>A  | Missense Mutation | TTC28    | p.D571V   | tetratricopeptide repeat    | 83 (0.00)  | 55 (0.44)  | 1.16 |
| 12-01 | Gp4 | g.chr2:74717511C>A   | Missense Mutation | TTC31    | p.Q125K   | tetratricopeptide repeat    | 18 (0.00)  | 67 (0.63)  | 1.67 |
| 12-01 | Gp4 | g.chr10:134673934C>T | Missense Mutation | TTC40    | p.D1729N  |                             | 273 (0.00) | 203 (0.92) | 2.44 |
| 12-01 | Gp4 | g.chr10:134752209C>A | Silent            | TTC40    | p.V140V   |                             | 81 (0.01)  | 295 (0.27) | 0.73 |
| 12-01 | Gp4 | g.chr2:47184122C>A   | Missense Mutation | TTC7A    | p.L165M   | tetratricopeptide repeat    | 269 (0.00) | 81 (0.43)  | 1.15 |
| 12-01 | Gp4 | g.chr14:91123518C>G  | Splice Site       | TTC7B    | p.W447C   | tetratricopeptide repeat    | 46 (0.00)  | 14 (0.36)  | 0.95 |
| 12-01 | Gp4 | g.chr1:117618030C>T  | Missense Mutation | TTF2     | p.P275L   | transcription terminator    | 210 (0.00) | 65 (0.35)  | 0.94 |
| 12-01 | Gp4 | g.chr1:117618806C>A  | Missense Mutation | TTF2     | p.T427K   | transcription terminator    | 177 (0.01) | 159 (0.64) | 1.71 |
| 12-01 | Gp4 | g.chr17:46868770C>T  | Silent            | TTL6     | p.L398L   | tubulin tyrosine ligase-li  | 44 (0.00)  | 35 (0.40)  | 1.07 |
| 12-01 | Gp4 | g.chr2:179407626G>A  | Missense Mutation | TTN      | p.P32319S | titin                       | 110 (0.00) | 12 (0.75)  | 2.00 |
| 12-01 | Gp4 | g.chr2:179423271C>A  | Missense Mutation | TTN      | p.S28972I | titin                       | 41 (0.00)  | 18 (0.44)  | 1.19 |
| 12-01 | Gp4 | g.chr2:179442018G>T  | Missense Mutation | TTN      | p.A23015E | titin                       | 117 (0.00) | 291 (0.44) | 1.16 |

|       |     |                      |                   |         |           |                           |             |            |      |
|-------|-----|----------------------|-------------------|---------|-----------|---------------------------|-------------|------------|------|
| 12-01 | Gp4 | g.chr2:179459148C>T  | Missense Mutation | TTN     | p.R19358H | titin                     | 113 (0.00)  | 71 (0.42)  | 1.13 |
| 12-01 | Gp4 | g.chr2:179542371G>T  | Missense Mutation | TTN     | p.P11423H | titin                     | 70 (0.00)   | 30 (0.63)  | 1.69 |
| 12-01 | Gp4 | g.chr2:179542443G>T  | Missense Mutation | TTN     | p.P11399H | titin                     | 166 (0.00)  | 45 (0.16)  | 0.41 |
| 12-01 | Gp4 | g.chr12:49522069A>G  | Missense Mutation | TUBA1B  | p.F343S   | tubulin, alpha 1b         | 152 (0.00)  | 93 (0.16)  | 0.43 |
| 12-01 | Gp4 | g.chr2:132237671C>A  | Missense Mutation | TUBA3D  | p.F135L   | tubulin, alpha 3d         | 241 (0.00)  | 230 (0.43) | 1.16 |
| 12-01 | Gp4 | g.chr2:132240304C>A  | Silent            | TUBA3D  | p.G412G   | tubulin, alpha 3d         | 280 (0.00)  | 285 (0.15) | 0.41 |
| 12-01 | Gp4 | g.chr2:220115948G>T  | Missense Mutation | TUBA4A  | p.S143Y   | tubulin, alpha 4a         | 112 (0.01)  | 164 (0.23) | 0.60 |
| 12-01 | Gp4 | g.chr20:57597927G>T  | Missense Mutation | TUBB1   | p.G29W    | tubulin, beta 1 class VI  | 89 (0.00)   | 73 (0.53)  | 1.42 |
| 12-01 | Gp4 | g.chr19:6495404C>A   | Missense Mutation | TUBB4A  | p.G369V   | tubulin, beta 4A class IV | 360 (0.00)  | 83 (0.46)  | 1.22 |
| 12-01 | Gp4 | g.chr9:140137623G>T  | Missense Mutation | TUBB4B  | p.R318M   | tubulin, beta 4B class IV | 265 (0.00)  | 176 (0.14) | 0.38 |
| 12-01 | Gp4 | g.chr16:90161642C>A  | RNA               | TUBB8P7 |           | tubulin, beta 8 class VII | 84 (0.00)   | 259 (0.42) | 1.12 |
| 12-01 | Gp4 | g.chr13:113212640G>T | Missense Mutation | TUBGCP3 | p.P140T   | tubulin, gamma comple     | 77 (0.00)   | 127 (0.47) | 1.26 |
| 12-01 | Gp4 | g.chr22:50656963G>T  | Silent            | TUBGCP6 | p.L1636L  | tubulin, gamma comple     | 60 (0.00)   | 157 (0.21) | 0.56 |
| 12-01 | Gp4 | g.chr22:50659050G>A  | Silent            | TUBGCP6 | p.S1246S  | tubulin, gamma comple     | 71 (0.00)   | 78 (0.26)  | 0.68 |
| 12-01 | Gp4 | g.chr22:50682717G>A  | Nonsense Mutation | TUBGCP6 | p.Q58*    | tubulin, gamma comple     | 54 (0.00)   | 377 (0.24) | 0.63 |
| 12-01 | Gp4 | g.chr1:32646027C>T   | Silent            | TXLNA   | p.P27P    | taxilin alpha             | 23 (0.00)   | 31 (0.26)  | 0.69 |
| 12-01 | Gp4 | g.chr1:145440782C>T  | Missense Mutation | TXNIP   | p.P328S   | thioredoxin interacting p | 28 (0.00)   | 24 (0.21)  | 0.56 |
| 12-01 | Gp4 | g.chr19:10479065C>G  | Missense Mutation | TYK2    | p.A75P    | tyrosine kinase 2         | 113 (0.00)  | 49 (0.51)  | 1.36 |
| 12-01 | Gp4 | g.chr15:41865220G>A  | Silent            | TYRO3   | p.L632L   | TYRO3 protein tyrosine    | 46 (0.00)   | 68 (0.22)  | 0.59 |
| 12-01 | Gp4 | g.chr19:34943050A>T  | Nonsense Mutation | UBA2    | p.K346*   | ubiquitin-like modifier ε | 79 (0.00)   | 19 (0.37)  | 0.98 |
| 12-01 | Gp4 | g.chr3:23848833G>A   | Missense Mutation | UBE2E1  | p.E25K    | ubiquitin-conjugating er  | 166 (0.00)  | 115 (0.30) | 0.81 |
| 12-01 | Gp4 | g.chr1:154523944C>A  | Nonsense Mutation | UBE2Q1  | p.E367*   | ubiquitin-conjugating er  | 45 (0.00)   | 23 (0.65)  | 1.74 |
| 12-01 | Gp4 | g.chr12:109961873C>A | Missense Mutation | UBE3B   | p.L819M   | ubiquitin protein ligase  | 178 (0.00)  | 108 (0.31) | 0.84 |
| 12-01 | Gp4 | g.chr12:109962283C>A | Missense Mutation | UBE3B   | p.S848Y   | ubiquitin protein ligase  | 195 (0.01)  | 25 (0.28)  | 0.75 |
| 12-01 | Gp4 | g.chr1:19467887G>C   | Silent            | UBR4    | p.T2814T  | ubiquitin protein ligase  | 190 (0.00)  | 16 (0.31)  | 0.83 |
| 12-01 | Gp4 | g.chr1:19467890C>T   | Silent            | UBR4    | p.E2813E  | ubiquitin protein ligase  | 187 (0.00)  | 19 (0.26)  | 0.70 |
| 12-01 | Gp4 | g.chr8:103284937G>A  | Nonsense Mutation | UBR5    | p.R2259*  | ubiquitin protein ligase  | 146 (0.00)  | 27 (0.96)  | 2.57 |
| 12-01 | Gp4 | g.chr11:62445472G>T  | Silent            | UBXN1   | p.R137R   | UBX domain protein 1      | 62 (0.00)   | 21 (0.67)  | 1.78 |
| 12-01 | Gp4 | g.chr1:165865459A>G  | Missense Mutation | UCK2    | p.D130G   | uridine-cytidine kinase   | 2105 (0.00) | 178 (0.62) | 1.66 |
| 12-01 | Gp4 | g.chr1:165876983C>A  | Missense Mutation | UCK2    | p.Q237K   | uridine-cytidine kinase   | 292 (0.00)  | 13 (0.46)  | 1.23 |
| 12-01 | Gp4 | g.chr1:165876988C>A  | Silent            | UCK2    | p.T238T   | uridine-cytidine kinase   | 292 (0.00)  | 13 (0.62)  | 1.64 |
| 12-01 | Gp4 | g.chr6:96974292C>A   | Missense Mutation | UFL1    | p.P149H   | UFM1-specific ligase 1    | 20 (0.00)   | 30 (0.80)  | 2.13 |
| 12-01 | Gp4 | g.chr2:234680989G>C  | Silent            | UGT1A6  | p.V461V   | UDP glucuronosyltransf    | 46 (0.00)   | 35 (0.23)  | 0.61 |
| 12-01 | Gp4 | g.chr19:4929259A>G   | RNA               | UHRF1   |           | ubiquitin-like with PHD   | 121 (0.00)  | 215 (0.19) | 0.51 |
| 12-01 | Gp4 | g.chr15:75131713G>T  | Splice Site       | ULK3    | p.T285N   | unc-51 like kinase 3      | 19 (0.00)   | 24 (0.33)  | 0.89 |

|       |     |                      |                   |         |          |                                      |            |            |      |
|-------|-----|----------------------|-------------------|---------|----------|--------------------------------------|------------|------------|------|
| 12-01 | Gp4 | g.chr16:20355481T>C  | Missense Mutation | UMOD    | p.H399R  | uromodulin                           | 69 (0.00)  | 13 (0.38)  | 1.03 |
| 12-01 | Gp4 | g.chr17:73832338C>A  | Splice Site       | UNC13D  |          | unc-13 homolog D (C. e 37 (0.00)     | 43 (0.47)  | 1.24       |      |
| 12-01 | Gp4 | g.chr15:91483553G>T  | Silent            | UNC45A  | p.V179V  | unc-45 homolog A (C. e 119 (0.00)    | 81 (0.16)  | 0.43       |      |
| 12-01 | Gp4 | g.chr15:91491979G>T  | Missense Mutation | UNC45A  | p.E611D  | unc-45 homolog A (C. e 76 (0.00)     | 89 (0.37)  | 0.99       |      |
| 12-01 | Gp4 | g.chr2:210808115C>T  | Silent            | UNC80   | p.D2238D | unc-80 homolog (C. ele 128 (0.00)    | 18 (0.83)  | 2.22       |      |
| 12-01 | Gp4 | g.chr22:45681854A>G  | Missense Mutation | UPK3A   | p.T29A   | uroplakin 3A                         | 112 (0.00) | 35 (0.34)  | 0.91 |
| 12-01 | Gp4 | g.chr2:158974394A>T  | Missense Mutation | UPP2    | p.H133L  | uridine phosphorylase 2 40 (0.00)    | 25 (0.32)  | 0.85       |      |
| 12-01 | Gp4 | g.chr6:33679349A>G   | Missense Mutation | UQCC2   | p.F39L   | ubiquinol-cytochrome c 69 (0.00)     | 45 (0.20)  | 0.53       |      |
| 12-01 | Gp4 | g.chr8:11995456A>G   | Missense Mutation | USP17L2 | p.S272P  | ubiquitin specific peptid 286 (0.00) | 54 (0.67)  | 1.78       |      |
| 12-01 | Gp4 | g.chr22:18652644G>T  | Nonsense Mutation | USP18   | p.E221*  | ubiquitin specific peptid 191 (0.00) | 134 (0.24) | 0.64       |      |
| 12-01 | Gp4 | g.chr9:132631951G>A  | Splice Site       | USP20   | p.V465I  | ubiquitin specific peptid 85 (0.01)  | 78 (0.19)  | 0.51       |      |
| 12-01 | Gp4 | g.chr1:161130717C>A  | Missense Mutation | USP21   | p.P96Q   | ubiquitin specific peptid 54 (0.00)  | 122 (0.16) | 0.42       |      |
| 12-01 | Gp4 | g.chr5:72868391G>A   | Missense Mutation | UTP15   | p.V251M  | UTP15, U3 small nucleotid 85 (0.00)  | 13 (0.62)  | 1.64       |      |
| 12-01 | Gp4 | g.chr4:1369171G>A    | Silent            | UVSSA   | p.E436E  | UV-stimulated scaffold 80 (0.00)     | 43 (0.19)  | 0.50       |      |
| 12-01 | Gp4 | g.chr1:160389064G>T  | Missense Mutation | VANGL2  | p.K155N  | VANGL planar cell pol 79 (0.00)      | 77 (0.16)  | 0.42       |      |
| 12-01 | Gp4 | g.chr14:77242571C>A  | Missense Mutation | VASH1   | p.D289E  | vasohibin 1                          | 19 (0.00)  | 27 (0.26)  | 0.69 |
| 12-01 | Gp4 | g.chr9:136637135C>T  | Silent            | VAV2    | p.V713V  | vav 2 guanine nucleotid 28 (0.00)    | 21 (0.29)  | 0.76       |      |
| 12-01 | Gp4 | g.chr2:71148320C>A   | Missense Mutation | VAX2    | p.L114M  | ventral anterior homeob 49 (0.00)    | 33 (0.33)  | 0.89       |      |
| 12-01 | Gp4 | g.chr9:35057443C>A   | Missense Mutation | VCP     | p.D749Y  | valosin containing prote 104 (0.01)  | 24 (0.54)  | 1.44       |      |
| 12-01 | Gp4 | g.chr6:43749815G>A   | Missense Mutation | VEGFA   | p.R182H  | vascular endothelial gro 52 (0.00)   | 35 (0.23)  | 0.61       |      |
| 12-01 | Gp4 | g.chr12:95656693C>T  | Silent            | VEZT    | p.F90F   | vezatin, adherens junctio 22 (0.00)  | 25 (0.56)  | 1.49       |      |
| 12-01 | Gp4 | g.chr3:38042968C>A   | Missense Mutation | VILL    | p.H402N  | villin-like                          | 115 (0.00) | 64 (0.36)  | 0.96 |
| 12-01 | Gp4 | g.chr3:38044027G>T   | Missense Mutation | VILL    | p.L540F  | villin-like                          | 198 (0.00) | 234 (0.38) | 1.00 |
| 12-01 | Gp4 | g.chr1:12566906G>T   | Splice Site       | VPS13D  |          | vacuolar protein sorting 76 (0.00)   | 79 (0.27)  | 0.71       |      |
| 12-01 | Gp4 | g.chr13:53013285G>A  | Missense Mutation | VPS36   | p.L62F   | vacuolar protein sorting 83 (0.00)   | 16 (0.75)  | 2.00       |      |
| 12-01 | Gp4 | g.chr16:69358127C>A  | Missense Mutation | VPS4A   | p.S410Y  | vacuolar protein sorting 114 (0.00)  | 77 (0.56)  | 1.49       |      |
| 12-01 | Gp4 | g.chr16:69358129C>A  | Missense Mutation | VPS4A   | p.L411M  | vacuolar protein sorting 114 (0.00)  | 79 (0.56)  | 1.49       |      |
| 12-01 | Gp4 | g.chr11:64875841G>T  | Missense Mutation | VPS51   | p.V300L  | vacuolar protein sorting 23 (0.00)   | 138 (0.17) | 0.44       |      |
| 12-01 | Gp4 | g.chr19:50512547C>A  | Missense Mutation | VRK3    | p.D79Y   | vaccinia related kinase 337 (0.00)   | 38 (0.47)  | 1.26       |      |
| 12-01 | Gp4 | g.chr14:74824305G>T  | Silent            | VRTN    | p.L273L  | vertebrae development 255 (0.00)     | 82 (0.17)  | 0.46       |      |
| 12-01 | Gp4 | g.chr12:118517295C>A | Nonsense Mutation | VSIG10  | p.E261*  | V-set and immunoglobulin 116 (0.00)  | 46 (0.24)  | 0.64       |      |
| 12-01 | Gp4 | g.chr12:118520091C>A | Missense Mutation | VSIG10  | p.A169S  | V-set and immunoglobulin 92 (0.00)   | 258 (0.22) | 0.59       |      |
| 12-01 | Gp4 | g.chr10:116038550C>A | Missense Mutation | VWA2    | p.P258Q  | von Willebrand factor A 142 (0.00)   | 183 (0.54) | 1.43       |      |
| 12-01 | Gp4 | g.chr10:116048924C>A | Missense Mutation | VWA2    | p.Q600K  | von Willebrand factor A 23 (0.00)    | 43 (0.40)  | 1.05       |      |
| 12-01 | Gp4 | g.chr3:183954260C>T  | Silent            | VWA5B2  | p.L448L  | von Willebrand factor A 23 (0.00)    | 12 (0.75)  | 2.00       |      |

|       |     |                      |                   |         |          |                           |            |            |      |
|-------|-----|----------------------|-------------------|---------|----------|---------------------------|------------|------------|------|
| 12-01 | Gp4 | g.chr2:114353383G>T  | RNA               | WASH2P  |          | WAS protein family hor    | 157 (0.00) | 213 (0.29) | 0.78 |
| 12-01 | Gp4 | g.chr10:104572508C>A | Missense Mutation | WBP1L   | p.T150N  | WW domain binding pr      | 49 (0.00)  | 70 (0.14)  | 0.38 |
| 12-01 | Gp4 | g.chr10:104572614C>A | Missense Mutation | WBP1L   | p.D185E  | WW domain binding pr      | 50 (0.00)  | 59 (0.17)  | 0.45 |
| 12-01 | Gp4 | g.chr10:49986694T>C  | Missense Mutation | WDFY4   | p.F1072L | WDFY family member        | 33 (0.00)  | 51 (0.37)  | 0.99 |
| 12-01 | Gp4 | g.chrX:48463342C>A   | Missense Mutation | WDR13   | p.S460R  | WD repeat domain 13       | 29 (0.00)  | 44 (0.23)  | 0.38 |
| 12-01 | Gp4 | g.chr16:739581G>T    | Silent            | WDR24   | p.T20T   | WD repeat domain 24       | 22 (0.00)  | 26 (0.19)  | 0.51 |
| 12-01 | Gp4 | g.chr14:100996330C>A | Silent            | WDR25   | p.S529S  | WD repeat domain 25       | 70 (0.00)  | 77 (0.26)  | 0.69 |
| 12-01 | Gp4 | g.chr10:1132244G>A   | Nonsense Mutation | WDR37   | p.W184*  | WD repeat domain 37       | 82 (0.00)  | 58 (0.17)  | 0.46 |
| 12-01 | Gp4 | g.chr3:49051533G>T   | Missense Mutation | WDR6    | p.V304L  | WD repeat domain 6        | 131 (0.00) | 61 (0.38)  | 1.01 |
| 12-01 | Gp4 | g.chr7:158683955G>T  | Splice Site       | WDR60   |          | WD repeat domain 60       | 135 (0.00) | 17 (0.29)  | 0.78 |
| 12-01 | Gp4 | g.chr7:158695287G>A  | Splice Site       | WDR60   |          | WD repeat domain 60       | 121 (0.00) | 57 (0.98)  | 2.62 |
| 12-01 | Gp4 | g.chr19:38385558G>T  | Missense Mutation | WDR87   | p.A223D  | WD repeat domain 87       | 46 (0.00)  | 18 (0.56)  | 1.48 |
| 12-01 | Gp4 | g.chr16:700569G>T    | Missense Mutation | WDR90   | p.R140L  | WD repeat domain 90       | 41 (0.00)  | 63 (0.71)  | 1.90 |
| 12-01 | Gp4 | g.chr15:90281301G>T  | Missense Mutation | WDR93   | p.D599Y  | WD repeat domain 93       | 346 (0.00) | 16 (0.31)  | 0.83 |
| 12-01 | Gp4 | g.chr20:43739165G>T  | Nonsense Mutation | WFDC5   | p.C81*   | WAP four-disulfide cor    | 22 (0.00)  | 52 (0.15)  | 0.41 |
| 12-01 | Gp4 | g.chr16:684043C>A    | Missense Mutation | WFIKKN1 | p.R545S  | WAP, follistatin/kazal, i | 26 (0.00)  | 66 (0.30)  | 0.81 |
| 12-01 | Gp4 | g.chr19:15558932C>A  | Missense Mutation | WIZ     | p.G63C   | widely interspaced zinc   | 210 (0.00) | 40 (0.23)  | 0.60 |
| 12-01 | Gp4 | g.chr9:96061537G>C   | Missense Mutation | WNK2    | p.G2074R | WNK lysine deficient p    | 66 (0.00)  | 119 (0.21) | 0.56 |
| 12-01 | Gp4 | g.chr12:1741846C>A   | Missense Mutation | WNT5B   | p.Q35K   | wingless-type MMTV ir     | 266 (0.00) | 330 (0.31) | 0.82 |
| 12-01 | Gp4 | g.chr22:46345952C>G  | Missense Mutation | WNT7B   | p.R53P   | wingless-type MMTV ir     | 28 (0.00)  | 26 (0.27)  | 0.72 |
| 12-01 | Gp4 | g.chr10:102241759G>T | Missense Mutation | WNT8B   | p.G153V  | wingless-type MMTV ir     | 99 (0.01)  | 51 (0.33)  | 0.89 |
| 12-01 | Gp4 | g.chr17:7605095C>A   | Silent            | WRAP53  | p.R282R  | WD repeat containing, a   | 20 (0.00)  | 12 (0.83)  | 2.22 |
| 12-01 | Gp4 | g.chr1:3552530G>C    | Missense Mutation | WRAP73  | p.A194G  | WD repeat containing, a   | 73 (0.00)  | 67 (0.18)  | 0.48 |
| 12-01 | Gp4 | g.chr19:34981288C>A  | Nonsense Mutation | WTIP    | p.C225*  | Wilms tumor 1 interacti   | 25 (0.00)  | 47 (0.21)  | 0.57 |
| 12-01 | Gp4 | g.chr19:7685834C>G   | Silent            | XAB2    | p.V623V  | XPA binding protein 2     | 28 (0.00)  | 47 (0.32)  | 0.85 |
| 12-01 | Gp4 | g.chr3:46062850G>T   | Missense Mutation | XCR1    | p.S197Y  | chemokine (C motif) rec   | 142 (0.00) | 37 (0.30)  | 0.79 |
| 12-01 | Gp4 | g.chr3:39228468C>A   | Silent            | XIRP1   | p.V823V  | xin actin-binding repeat  | 83 (0.00)  | 58 (0.26)  | 0.69 |
| 12-01 | Gp4 | g.chr8:56436138G>T   | Missense Mutation | XKR4    | p.M435I  | XK, Kell blood group c    | 268 (0.00) | 221 (0.17) | 0.45 |
| 12-01 | Gp4 | g.chr8:6673254C>A    | RNA               | XKR5    |          | XK, Kell blood group c    | 48 (0.00)  | 43 (0.23)  | 0.76 |
| 12-01 | Gp4 | g.chr3:14193320C>G   | Intron            | XPC     |          | xeroderma pigmentosun     | 133 (0.00) | 42 (0.31)  | 0.83 |
| 12-01 | Gp4 | g.chr22:42018080T>A  | Silent            | XRCC6   | p.L24L   | X-ray repair complemer    | 23 (0.00)  | 83 (0.33)  | 0.87 |
| 12-01 | Gp4 | g.chr3:142166742G>T  | Silent            | XRN1    | p.P15P   | 5'-3' exoribonuclease 1   | 57 (0.00)  | 77 (0.18)  | 0.48 |
| 12-01 | Gp4 | g.chr17:48431795G>T  | Missense Mutation | XYLT2   | p.D219Y  | xylosyltransferase II     | 87 (0.00)  | 89 (0.20)  | 0.54 |
| 12-01 | Gp4 | g.chr11:66052999G>C  | Missense Mutation | YIF1A   | p.P22R   | Yip1 interacting factor   | 64 (0.00)  | 39 (0.23)  | 0.62 |
| 12-01 | Gp4 | g.chr18:72913949C>A  | Missense Mutation | ZADH2   | p.G63C   | zinc binding alcohol del  | 302 (0.00) | 27 (0.52)  | 1.82 |

|       |     |                      |                   |         |          |                           |              |            |      |
|-------|-----|----------------------|-------------------|---------|----------|---------------------------|--------------|------------|------|
| 12-01 | Gp4 | g.chr2:98354259C>A   | Missense Mutation | ZAP70   | p.P508T  | zeta-chain (TCR) associ   | 99 (0.00)    | 185 (0.23) | 0.61 |
| 12-01 | Gp4 | g.chr22:50278508C>A  | Missense Mutation | ZBED4   | p.H400N  | zinc finger, BED-type c   | 98 (0.00)    | 237 (0.24) | 0.65 |
| 12-01 | Gp4 | g.chr1:244218593C>T  | Missense Mutation | ZBTB18  | p.S506L  | zinc finger and BTB do    | 176 (0.00)   | 173 (0.35) | 0.94 |
| 12-01 | Gp4 | g.chr3:114069707G>T  | Silent            | ZBTB20  | p.P333P  | zinc finger and BTB do    | 109 (0.01)   | 177 (0.40) | 1.05 |
| 12-01 | Gp4 | g.chr6:109802293G>T  | Missense Mutation | ZBTB24  | p.Q313K  | zinc finger and BTB do    | 69 (0.01)    | 37 (0.24)  | 0.65 |
| 12-01 | Gp4 | g.chr6:109802923C>A  | Nonsense Mutation | ZBTB24  | p.E103*  | zinc finger and BTB do    | 176 (0.00)   | 12 (0.67)  | 1.78 |
| 12-01 | Gp4 | g.chrX:119387348T>C  | Silent            | ZBTB33  | p.R26R   | zinc finger and BTB do    | 38 (0.00)    | 91 (0.31)  | 0.51 |
| 12-01 | Gp4 | g.chr1:173840129C>A  | Missense Mutation | ZBTB37  | p.P256T  | zinc finger and BTB do    | 56 (0.02)    | 13 (0.62)  | 1.64 |
| 12-01 | Gp4 | g.chr17:7369475C>T   | Missense Mutation | ZBTB4   | p.D216N  | zinc finger and BTB do    | 45 (0.00)    | 81 (0.31)  | 0.82 |
| 12-01 | Gp4 | g.chr3:42701239C>A   | Silent            | ZBTB47  | p.I464I  | zinc finger and BTB do    | 93 (0.00)    | 279 (0.15) | 0.39 |
| 12-01 | Gp4 | g.chr14:89039251T>C  | Missense Mutation | ZC3H14  | p.V254A  | zinc finger CCCH-type     | 93 (0.00)    | 128 (0.18) | 0.48 |
| 12-01 | Gp4 | g.chr2:113090024G>T  | Missense Mutation | ZC3H6   | p.V1177F | zinc finger CCCH-type     | 138 (0.00)   | 39 (0.31)  | 0.82 |
| 12-01 | Gp4 | g.chr22:41723277C>T  | Missense Mutation | ZC3H7B  | p.A118V  | zinc finger CCCH-type     | 61 (0.00)    | 114 (0.18) | 0.49 |
| 12-01 | Gp4 | g.chr18:60242771G>A  | Missense Mutation | ZCCHC2  | p.A1153T | zinc finger, CCHC dom     | 88 (0.00)    | 11 (0.45)  | 1.21 |
| 12-01 | Gp4 | g.chr5:825300C>A     | Missense Mutation | ZDHHC11 | p.Q334H  | zinc finger, DHHC-type    | 103 (0.00)   | 33 (0.27)  | 0.73 |
| 12-01 | Gp4 | g.chr10:99212678G>T  | Missense Mutation | ZDHHC16 | p.C185F  | zinc finger, DHHC-type    | 207 (0.00)   | 294 (1.00) | 2.66 |
| 12-01 | Gp4 | g.chr3:113672876G>T  | Missense Mutation | ZDHHC23 | p.G164V  | zinc finger, DHHC-type    | 352 (0.00)   | 32 (0.84)  | 2.25 |
| 12-01 | Gp4 | g.chr3:44986745C>A   | Nonsense Mutation | ZDHHC3  | p.E150*  | zinc finger, DHHC-type    | 242 (0.00)   | 29 (0.28)  | 0.74 |
| 12-01 | Gp4 | g.chr9:131513724G>T  | Missense Mutation | ZER1    | p.L336M  | zyg-11 related, cell cycl | 142 (0.00)   | 37 (0.16)  | 0.43 |
| 12-01 | Gp4 | g.chr8:135614438C>A  | Missense Mutation | ZFAT    | p.Q508H  | zinc finger and AT hook   | 96 (0.00)    | 199 (0.24) | 0.64 |
| 12-01 | Gp4 | g.chr14:23993379C>A  | Silent            | ZFHX2   | p.V1924V | zinc finger homeobox 2    | 67 (0.00)    | 17 (0.47)  | 1.25 |
| 12-01 | Gp4 | g.chr16:72831290G>T  | Missense Mutation | ZFHX3   | p.A1764D | zinc finger homeobox 3    | 86 (0.00)    | 31 (0.55)  | 0.60 |
| 12-01 | Gp4 | g.chr16:72845620C>T  | Silent            | ZFHX3   | p.V1240V | zinc finger homeobox 3    | 125 (0.00)   | 39 (0.79)  | 0.87 |
| 12-01 | Gp4 | g.chr16:72923701T>C  | Missense Mutation | ZFHX3   | p.K1126R | zinc finger homeobox 3    | 41 (0.00)    | 24 (0.71)  | 0.78 |
| 12-01 | Gp4 | g.chr15:41106005C>A  | Missense Mutation | ZFYVE19 | p.P227H  | zinc finger, FYVE dom     | 114 (0.00)   | 144 (0.43) | 1.15 |
| 12-01 | Gp4 | g.chr14:68249985G>T  | Nonsense Mutation | ZFYVE26 | p.S1295* | zinc finger, FYVE dom     | 126 (0.00)   | 56 (0.39)  | 1.05 |
| 12-01 | Gp4 | g.chr14:68265093T>C  | Missense Mutation | ZFYVE26 | p.K629R  | zinc finger, FYVE dom     | 51 (0.00)    | 20 (0.30)  | 0.80 |
| 12-01 | Gp4 | g.chr14:68270908G>A  | Missense Mutation | ZFYVE26 | p.H449Y  | zinc finger, FYVE dom     | 81 (0.00)    | 19 (0.42)  | 1.12 |
| 12-01 | Gp4 | g.chr4:2343238G>C    | Missense Mutation | ZFYVE28 | p.D48E   | zinc finger, FYVE dom     | 47 (0.00)    | 28 (0.32)  | 0.86 |
| 12-01 | Gp4 | g.chr13:100635086A>G | Silent            | ZIC2    | p.L256L  | Zic family member 2       | 82 (0.00)    | 41 (0.20)  | 0.52 |
| 12-01 | Gp4 | g.chr10:80968173G>T  | Silent            | ZMIZ1   | p.R47R   | zinc finger, MIZ-type     | cc21 (0.00)  | 87 (0.57)  | 1.53 |
| 12-01 | Gp4 | g.chr7:44805848G>T   | Silent            | ZMIZ2   | p.P776P  | zinc finger, MIZ-type     | cc44 (0.00)  | 44 (0.84)  | 2.24 |
| 12-01 | Gp4 | g.chr20:45853003A>G  | Missense Mutation | ZMYND8  | p.W923R  | zinc finger, MYND-typ     | cc89 (0.00)  | 85 (0.20)  | 0.53 |
| 12-01 | Gp4 | g.chr20:45853052G>A  | Silent            | ZMYND8  | p.Y906Y  | zinc finger, MYND-typ     | cc160 (0.00) | 115 (0.69) | 1.83 |
| 12-01 | Gp4 | g.chr16:3169658G>C   | Missense Mutation | ZNF205  | p.E333Q  | zinc finger protein 205   | 78 (0.00)    | 150 (0.31) | 0.84 |

|       |     |                     |                   |         |         |                          |            |            |      |
|-------|-----|---------------------|-------------------|---------|---------|--------------------------|------------|------------|------|
| 12-01 | Gp4 | g.chr7:148947284C>T | Missense Mutation | ZNF212  | p.S20F  | zinc finger protein 212  | 58 (0.00)  | 31 (0.48)  | 1.29 |
| 12-01 | Gp4 | g.chr16:3187400A>G  | Missense Mutation | ZNF213  | p.D40G  | zinc finger protein 213  | 216 (0.00) | 174 (0.23) | 0.61 |
| 12-01 | Gp4 | g.chr19:44610610C>A | Silent            | ZNF224  | p.S99S  | zinc finger protein 224  | 38 (0.00)  | 27 (0.37)  | 0.99 |
| 12-01 | Gp4 | g.chr10:38241329C>A | Missense Mutation | ZNF25   | p.G366V | zinc finger protein 25   | 32 (0.00)  | 22 (0.50)  | 1.33 |
| 12-01 | Gp4 | g.chr22:22869000G>T | Missense Mutation | ZNF280A | p.H319N | zinc finger protein 280A | 66 (0.00)  | 19 (0.37)  | 0.98 |
| 12-01 | Gp4 | g.chr1:200378282G>T | Silent            | ZNF281  | p.V184V | zinc finger protein 281  | 138 (0.00) | 102 (0.33) | 0.89 |
| 12-01 | Gp4 | g.chr19:45575076T>C | Missense Mutation | ZNF296  | p.H404R | zinc finger protein 296  | 100 (0.00) | 28 (0.61)  | 2.03 |
| 12-01 | Gp4 | g.chr19:45575090G>T | Missense Mutation | ZNF296  | p.S399R | zinc finger protein 296  | 98 (0.00)  | 26 (0.58)  | 1.93 |
| 12-01 | Gp4 | g.chr5:71756240C>G  | Missense Mutation | ZNF366  | p.G362R | zinc finger protein 366  | 86 (0.00)  | 115 (0.15) | 0.39 |
| 12-01 | Gp4 | g.chr12:6778352G>T  | Missense Mutation | ZNF384  | p.H277N | zinc finger protein 384  | 91 (0.00)  | 33 (0.67)  | 1.78 |
| 12-01 | Gp4 | g.chr19:12358753C>T | Missense Mutation | ZNF44   | p.C321Y | zinc finger protein 44   | 20 (0.00)  | 24 (0.88)  | 2.33 |
| 12-01 | Gp4 | g.chr9:109689842C>G | Missense Mutation | ZNF462  | p.R62G  | zinc finger protein 462  | 411 (0.00) | 88 (0.32)  | 0.85 |
| 12-01 | Gp4 | g.chr19:50549664T>A | Missense Mutation | ZNF473  | p.F655Y | zinc finger protein 473  | 40 (0.00)  | 30 (0.33)  | 0.89 |
| 12-01 | Gp4 | g.chr9:114293204G>A | Silent            | ZNF483  | p.E154E | zinc finger protein 483  | 20 (0.00)  | 35 (0.71)  | 1.90 |
| 12-01 | Gp4 | g.chr10:48371065C>A | Nonsense Mutation | ZNF488  | p.S178* | zinc finger protein 488  | 53 (0.00)  | 27 (0.22)  | 0.59 |
| 12-01 | Gp4 | g.chr18:74154264C>T | Silent            | ZNF516  | p.P249P | zinc finger protein 516  | 33 (0.00)  | 25 (0.24)  | 0.84 |
| 12-01 | Gp4 | g.chr19:42728937G>T | Missense Mutation | ZNF526  | p.D128Y | zinc finger protein 526  | 35 (0.00)  | 52 (0.48)  | 1.28 |
| 12-01 | Gp4 | g.chr19:30934755C>A | Missense Mutation | ZNF536  | p.L96I  | zinc finger protein 536  | 49 (0.00)  | 51 (0.29)  | 0.78 |
| 12-01 | Gp4 | g.chr19:30935687C>A | Silent            | ZNF536  | p.P406P | zinc finger protein 536  | 53 (0.00)  | 116 (0.47) | 1.26 |
| 12-01 | Gp4 | g.chr19:48047660G>T | Missense Mutation | ZNF541  | p.P709Q | zinc finger protein 541  | 25 (0.00)  | 31 (0.39)  | 1.03 |
| 12-01 | Gp4 | g.chr19:2876206C>A  | Silent            | ZNF556  | p.S82S  | zinc finger protein 556  | 81 (0.00)  | 41 (0.46)  | 1.24 |
| 12-01 | Gp4 | g.chr19:53208414G>A | Missense Mutation | ZNF611  | p.R632C | zinc finger protein 611  | 119 (0.01) | 22 (0.36)  | 0.97 |
| 12-01 | Gp4 | g.chr19:55993076C>T | Silent            | ZNF628  | p.G172G | zinc finger protein 628  | 16 (0.00)  | 48 (0.29)  | 0.78 |
| 12-01 | Gp4 | g.chr16:31072452C>G | Silent            | ZNF668  | p.G599G | zinc finger protein 668  | 98 (0.00)  | 164 (0.26) | 0.70 |
| 12-01 | Gp4 | g.chr17:80788076G>T | Missense Mutation | ZNF750  | p.A705E | zinc finger protein 750  | 93 (0.00)  | 59 (0.42)  | 1.13 |
| 12-01 | Gp4 | g.chr6:35261578G>A  | Missense Mutation | ZNF76   | p.M460I | zinc finger protein 76   | 63 (0.00)  | 183 (0.22) | 0.58 |
| 12-01 | Gp4 | g.chr19:53926326G>A | Missense Mutation | ZNF765  | p.E52K  | zinc finger protein 765  | 216 (0.00) | 47 (0.34)  | 0.91 |
| 12-01 | Gp4 | g.chr16:30537210G>A | Missense Mutation | ZNF768  | p.P84L  | zinc finger protein 768  | 47 (0.00)  | 15 (0.60)  | 1.60 |
| 12-01 | Gp4 | g.chr7:148769441T>A | Silent            | ZNF786  | p.P141P | zinc finger protein 786  | 52 (0.00)  | 158 (0.41) | 1.10 |
| 12-01 | Gp4 | g.chr4:206511C>G    | RNA               | ZNF876P |         | zinc finger protein 876, | 30 (0.00)  | 81 (0.32)  | 0.86 |
| 12-01 | Gp4 | g.chr19:22605020C>T | Missense Mutation | ZNF98   | p.G3R   | zinc finger protein 98   | 52 (0.00)  | 54 (0.41)  | 1.09 |
| 12-01 | Gp4 | g.chr22:29445231C>T | Silent            | ZNRF3   | p.L354L | zinc and ring finger 3   | 158 (0.01) | 123 (0.47) | 1.26 |
| 12-01 | Gp4 | g.chr7:76062786G>T  | Splice Site       | ZP3     |         | zona pellucida glycopro  | 108 (0.00) | 43 (0.23)  | 0.62 |
| 12-01 | Gp4 | g.chr16:3142137C>A  | Nonsense Mutation | ZSCAN10 | p.E138* | zinc finger and SCAN d   | 16 (0.00)  | 42 (0.40)  | 1.08 |
| 12-01 | Gp4 | g.chr20:44512362G>C | Missense Mutation | ZSWIM1  | p.Q377H | zinc finger, SWIM-type   | 188 (0.00) | 34 (0.21)  | 0.55 |



|       |     |                      |                   |            |          |                                     |            |      |
|-------|-----|----------------------|-------------------|------------|----------|-------------------------------------|------------|------|
| 12-01 | Gp4 | g.chr20:44506974G>T  | Missense Mutation | ZSWIM3     | p.G593W  | zinc finger, SWIM-type 157 (0.00)   | 259 (0.20) | 0.54 |
| 12-01 | Gp4 | g.chr19:13919965C>G  | Missense Mutation | ZSWIM4     | p.R315G  | zinc finger, SWIM-type 21 (0.00)    | 101 (0.18) | 0.48 |
| 12-01 | Gp4 | g.chr10:75558854A>T  | Missense Mutation | ZSWIM8     | p.Q1419L | zinc finger, SWIM-type 102 (0.01)   | 173 (0.50) | 1.34 |
| 12-01 | Gp4 | g.chr3:126193916C>A  | Nonsense Mutation | ZXDC       | p.E265*  | ZXD family zinc finger 29 (0.00)    | 27 (0.19)  | 0.49 |
| 12-01 | Gp4 | g.chr7:143079462G>T  | Missense Mutation | ZYX        | p.E110D  | zyxin 28 (0.00)                     | 15 (0.53)  | 1.42 |
| 12-01 | Gp4 | g.chr17:3920698G>T   | Missense Mutation | ZZEF1      | p.F2656L | zinc finger, ZZ-type wit 70 (0.00)  | 104 (0.41) | 1.10 |
| 12-01 | Gp4 | g.chr17:3968075G>A   | Missense Mutation | ZZEF1      | p.T1433M | zinc finger, ZZ-type wit 73 (0.00)  | 54 (0.74)  | 1.98 |
| 12-02 | Gp3 | g.chr12:53702526G>A  | Missense Mutation | AAAS       | p.S357F  | achalasia, adrenocortica 46 (0.00)  | 51 (0.27)  | 0.73 |
| 12-02 | Gp3 | g.chr17:35346709C>A  | Splice Site       | AATF       | p.P438Q  | apoptosis antagonizing t57 (0.00)   | 22 (0.23)  | 0.61 |
| 12-02 | Gp3 | g.chr2:215876760G>T  | Missense Mutation | ABCA12     | p.P686T  | ATP-binding cassette, s1 174 (0.00) | 109 (0.15) | 0.39 |
| 12-02 | Gp3 | g.chr13:95715088G>T  | Missense Mutation | ABCC4      | p.A1079D | ATP-binding cassette, s1 57 (0.00)  | 35 (0.17)  | 0.46 |
| 12-02 | Gp3 | g.chr15:89695016C>T  | Silent            | ABHD2      | p.I101I  | abhydrolase domain con30 (0.00)     | 78 (0.23)  | 0.62 |
| 12-02 | Gp3 | g.chr2:58688928C>A   | lincRNA           | AC007092.1 |          | 37 (0.00)                           | 33 (0.39)  | 1.05 |
| 12-02 | Gp3 | g.chr2:62373999G>T   | RNA               | AC018462.2 |          | 35 (0.00)                           | 47 (0.57)  | 1.53 |
| 12-02 | Gp3 | g.chr8:61851023T>A   | lincRNA           | AC022182.1 |          | 56 (0.00)                           | 17 (0.53)  | 1.41 |
| 12-02 | Gp3 | g.chr10:15120564T>A  | Nonsense Mutation | ACBD7      | p.K78*   | acyl-CoA binding doma 40 (0.00)     | 35 (0.20)  | 0.53 |
| 12-02 | Gp3 | g.chr4:8416616G>A    | Missense Mutation | ACOX3      | p.H140Y  | acyl-CoA oxidase 3, pri:80 (0.00)   | 38 (0.16)  | 0.42 |
| 12-02 | Gp3 | g.chr3:38520636G>T   | Missense Mutation | ACVR2B     | p.Q228H  | activin A receptor, type 28 (0.00)  | 49 (0.16)  | 0.44 |
| 12-02 | Gp3 | g.chr10:127806666T>A | Missense Mutation | ADAM12     | p.T185S  | ADAM metallopeptidas 52 (0.00)      | 56 (0.21)  | 0.57 |
| 12-02 | Gp3 | g.chr7:87795245C>A   | Silent            | ADAM22     | p.I725I  | ADAM metallopeptidas 140 (0.00)     | 42 (0.31)  | 0.83 |
| 12-02 | Gp3 | g.chr8:24207412G>C   | Missense Mutation | ADAM28     | p.A676P  | ADAM metallopeptidas 41 (0.00)      | 17 (0.29)  | 0.78 |
| 12-02 | Gp3 | g.chr3:64641251C>T   | Splice Site       | ADAMTS9    |          | ADAM metallopeptidas 115 (0.00)     | 55 (0.20)  | 0.53 |
| 12-02 | Gp3 | g.chr7:140373855C>G  | Nonsense Mutation | ADCK2      | p.S242*  | aarF domain containing 22 (0.00)    | 99 (0.18)  | 0.48 |
| 12-02 | Gp3 | g.chr5:7727281G>T    | Missense Mutation | ADCY2      | p.R593L  | adenylate cyclase 2 (bra 20 (0.00)  | 43 (0.21)  | 0.56 |
| 12-02 | Gp3 | g.chr14:24799097C>A  | Missense Mutation | ADCY4      | p.A396S  | adenylate cyclase 4 20 (0.00)       | 53 (0.15)  | 0.40 |
| 12-02 | Gp3 | g.chr16:4163766C>G   | Missense Mutation | ADCY9      | p.A560P  | adenylate cyclase 9 20 (0.00)       | 31 (0.16)  | 0.59 |
| 12-02 | Gp3 | g.chr6:147012420G>T  | Missense Mutation | ADGB       | p.A494S  | androglobin 27 (0.00)               | 24 (0.38)  | 1.00 |
| 12-02 | Gp3 | g.chr4:100129871G>A  | Missense Mutation | ADH6       | p.A261V  | alcohol dehydrogenase (37 (0.00)    | 46 (0.43)  | 1.16 |
| 12-02 | Gp3 | g.chr20:49509396C>A  | Missense Mutation | ADNP       | p.V619F  | activity-dependent neurc 56 (0.00)  | 37 (0.19)  | 0.50 |
| 12-02 | Gp3 | g.chr10:88769239G>T  | RNA               | AGAP11     |          | ankyrin repeat and GTP:23 (0.00)    | 91 (0.18)  | 0.47 |
| 12-02 | Gp3 | g.chr2:27277675G>T   | Splice Site       | AGBL5      | p.R243S  | ATP/GTP binding prote 81 (0.00)     | 44 (0.30)  | 0.79 |
| 12-02 | Gp3 | g.chr1:100350183C>G  | Missense Mutation | AGL        | p.Q869E  | amylo-alpha-1, 6-glucos 69 (0.00)   | 27 (0.19)  | 0.49 |
| 12-02 | Gp3 | g.chr1:36492776C>A   | Missense Mutation | AGO3       | p.P490T  | argonaute RISC catalyti 48 (0.00)   | 73 (0.25)  | 0.66 |
| 12-02 | Gp3 | g.chr1:36298166A>T   | Missense Mutation | AGO4       | p.L458F  | argonaute RISC catalyti 30 (0.00)   | 16 (0.50)  | 1.33 |
| 12-02 | Gp3 | g.chr8:41472523G>A   | Missense Mutation | AGPAT6     | p.G337R  | 1-acylglycerol-3-phosph 47 (0.00)   | 39 (0.26)  | 0.68 |

|       |     |                      |                   |             |          |                          |             |            |      |
|-------|-----|----------------------|-------------------|-------------|----------|--------------------------|-------------|------------|------|
| 12-02 | Gp3 | g.chr6:135787113T>C  | Silent            | AHI1        | p.V196V  | Abelson helper integrati | 35 (0.00)   | 20 (0.25)  | 0.67 |
| 12-02 | Gp3 | g.chr11:62290929G>A  | Silent            | AHNAK       | p.L3654L | AHNAK nucleoprotein      | 34 (0.00)   | 14 (0.36)  | 0.95 |
| 12-02 | Gp3 | g.chr4:107249301C>A  | Missense Mutation | AIMP1       | p.Q98K   | aminoacyl tRNA synthe    | 23 (0.00)   | 19 (0.26)  | 0.70 |
| 12-02 | Gp3 | g.chr1:33480184G>T   | Missense Mutation | AK2         | p.P146H  | adenylate kinase 2       | 85 (0.00)   | 46 (0.20)  | 0.52 |
| 12-02 | Gp3 | g.chr13:42876393T>A  | Missense Mutation | AKAP11      | p.S1171T | A kinase (PRKA) ancho    | 129 (0.00)  | 23 (0.48)  | 1.28 |
| 12-02 | Gp3 | g.chr6:151670408A>G  | Silent            | AKAP12      | p.S294S  | A kinase (PRKA) ancho    | 22 (0.00)   | 23 (0.35)  | 0.93 |
| 12-02 | Gp3 | g.chr7:91714173C>A   | Missense Mutation | AKAP9       | p.H2917Q | A kinase (PRKA) ancho    | 162 (0.00)  | 60 (0.15)  | 0.40 |
| 12-02 | Gp3 | g.chr7:91727092C>A   | Missense Mutation | AKAP9       | p.Q3531K | A kinase (PRKA) ancho    | 74 (0.00)   | 17 (0.35)  | 0.94 |
| 12-02 | Gp3 | g.chr9:117121939C>G  | Missense Mutation | AKNA        | p.E809D  | AT-hook transcription fi | 23 (0.00)   | 33 (0.21)  | 0.57 |
| 12-02 | Gp3 | g.chr17:18326044G>A  | RNA               | AL353997.3  |          |                          | 32 (0.00)   | 72 (0.19)  | 0.52 |
| 12-02 | Gp3 | g.chr10:97373730G>T  | Silent            | ALDH18A1    | p.T598T  | aldehyde dehydrogenase   | 60 (0.00)   | 37 (0.27)  | 0.72 |
| 12-02 | Gp3 | g.chr2:202357544C>A  | Missense Mutation | ALS2CR11    | p.D1174Y | amyotrophic lateral scl  | 35 (0.00)   | 29 (0.31)  | 0.83 |
| 12-02 | Gp3 | g.chrX:112033824G>T  | Missense Mutation | AMOT        | p.Q705K  | angiomotin               | 47 (0.02)   | 33 (0.64)  | 1.06 |
| 12-02 | Gp3 | g.chr11:94533280T>C  | Silent            | AMOTL1      | p.G308G  | angiomotin like 1        | 21 (0.00)   | 72 (0.15)  | 0.41 |
| 12-02 | Gp3 | g.chr12:121773445G>A | Silent            | ANAPC5      | p.L281L  | anaphase promoting con   | 31 (0.00)   | 15 (0.47)  | 0.74 |
| 12-02 | Gp3 | g.chr8:41545725C>A   | Missense Mutation | ANK1        | p.A1403S | ankyrin 1, erythrocytic  | 22 (0.00)   | 42 (0.36)  | 0.95 |
| 12-02 | Gp3 | g.chr5:139909183G>T  | Missense Mutation | ANKHD1      | p.D2218Y | ankyrin repeat and KH    | 53 (0.00)   | 37 (0.27)  | 0.72 |
| 12-02 | Gp3 | g.chr2:241419029C>A  | Missense Mutation | ANKMY1      | p.Q843H  | ankyrin repeat and MY    | 17 (0.00)   | 109 (0.18) | 0.49 |
| 12-02 | Gp3 | g.chr4:73979546T>C   | Missense Mutation | ANKRD17     | p.N1455S | ankyrin repeat domain    | 187 (0.00)  | 43 (0.19)  | 0.50 |
| 12-02 | Gp3 | g.chr4:74026963G>T   | Missense Mutation | ANKRD17     | p.A217D  | ankyrin repeat domain    | 122 (0.00)  | 30 (0.20)  | 0.53 |
| 12-02 | Gp3 | g.chr9:33548198G>T   | Missense Mutation | ANKRD18B    | p.R409M  | ankyrin repeat domain    | 161 (0.00)  | 19 (0.26)  | 0.70 |
| 12-02 | Gp3 | g.chr9:67951956G>T   | Nonsense Mutation | ANKRD20A1   | p.E307*  | ankyrin repeat domain    | 249 (0.00)  | 24 (0.25)  | 0.67 |
| 12-02 | Gp3 | g.chr21:15347490T>A  | RNA               | ANKRD20A11P |          | ankyrin repeat domain    | 223 (0.00)  | 16 (0.44)  | 1.17 |
| 12-02 | Gp3 | g.chr2:95484533G>A   | RNA               | ANKRD20A8P  |          | ankyrin repeat domain    | 2181 (0.00) | 37 (0.51)  | 1.37 |
| 12-02 | Gp3 | g.chr4:80898856C>A   | Splice Site       | ANTXR2      |          | anthrax toxin receptor   | 256 (0.00)  | 27 (0.37)  | 0.99 |
| 12-02 | Gp3 | g.chr7:36588256G>A   | Silent            | AOAH        | p.I365I  | acyloxyacyl hydrolase    | 136 (0.00)  | 75 (0.15)  | 0.39 |
| 12-02 | Gp3 | g.chr17:33977734T>A  | Nonsense Mutation | AP2B1       | p.Y574*  | adaptor-related protein  | 21 (0.00)   | 18 (0.56)  | 1.48 |
| 12-02 | Gp3 | g.chr1:114442525C>T  | Splice Site       | AP4B1       |          | adaptor-related protein  | 109 (0.00)  | 142 (0.16) | 0.43 |
| 12-02 | Gp3 | g.chr1:114445397C>G  | Missense Mutation | AP4B1       | p.L67F   | adaptor-related protein  | 29 (0.00)   | 23 (0.26)  | 0.70 |
| 12-02 | Gp3 | g.chr4:41015885C>T   | Missense Mutation | APBB2       | p.G184R  | amyloid beta (A4) precu  | 69 (0.00)   | 64 (0.33)  | 0.88 |
| 12-02 | Gp3 | g.chr5:112163668G>C  | Missense Mutation | APC         | p.A531P  | adenomatous polyposis    | 32 (0.00)   | 26 (0.19)  | 0.51 |
| 12-02 | Gp3 | g.chr2:68765332C>T   | Missense Mutation | APLF        | p.S378F  | aprataxin and PNKP lik   | 31 (0.00)   | 14 (0.50)  | 1.33 |
| 12-02 | Gp3 | g.chr2:21231802G>T   | Silent            | APOB        | p.S2646S | apolipoprotein B         | 37 (0.00)   | 29 (0.38)  | 1.01 |
| 12-02 | Gp3 | g.chr17:64224221G>T  | Missense Mutation | APOH        | p.P53Q   | apolipoprotein H (beta   | 277 (0.00)  | 37 (0.19)  | 0.50 |
| 12-02 | Gp3 | g.chr22:36054723G>C  | Missense Mutation | APOL6       | p.E38Q   | apolipoprotein L, 6      | 50 (0.00)   | 34 (0.15)  | 0.39 |

|       |     |                     |                   |           |          |                                     |           |      |
|-------|-----|---------------------|-------------------|-----------|----------|-------------------------------------|-----------|------|
| 12-02 | Gp3 | g.chr15:30927766G>T | Missense Mutation | ARHGAP11B | p.W246L  | Rho GTPase activating j114 (0.00)   | 54 (0.17) | 0.44 |
| 12-02 | Gp3 | g.chr19:47425251G>C | Missense Mutation | ARHGAP35  | p.V1107L | Rho GTPase activating j57 (0.00)    | 35 (0.14) | 0.54 |
| 12-02 | Gp3 | g.chr1:156939823G>A | Silent            | ARHGEF11  | p.L239L  | Rho guanine nucleotide 34 (0.00)    | 27 (0.37) | 0.99 |
| 12-02 | Gp3 | g.chr3:56766320C>A  | Nonsense Mutation | ARHGEF3   | p.G363*  | Rho guanine nucleotide 26 (0.00)    | 25 (0.20) | 0.53 |
| 12-02 | Gp3 | g.chr3:56779291C>G  | Missense Mutation | ARHGEF3   | p.R242P  | Rho guanine nucleotide 64 (0.00)    | 19 (0.26) | 0.70 |
| 12-02 | Gp3 | g.chr2:39184082C>T  | Silent            | ARHGEF33  | p.L422L  | Rho guanine nucleotide 29 (0.00)    | 16 (0.62) | 1.67 |
| 12-02 | Gp3 | g.chr10:63662148G>A | Silent            | ARID5B    | p.Q84Q   | AT rich interactive dom 86 (0.00)   | 67 (0.15) | 0.40 |
| 12-02 | Gp3 | g.chr4:57384934G>A  | Missense Mutation | ARL9      | p.S36N   | ADP-ribosylation factor 49 (0.00)   | 16 (0.31) | 0.83 |
| 12-02 | Gp3 | g.chr6:109225507A>T | Missense Mutation | ARMC2     | p.N308Y  | armadillo repeat contain 25 (0.00)  | 22 (0.23) | 0.61 |
| 12-02 | Gp3 | g.chr6:109285451C>A | Missense Mutation | ARMC2     | p.L741I  | armadillo repeat contain 102 (0.00) | 17 (0.41) | 1.10 |
| 12-02 | Gp3 | g.chr3:137991858G>A | Missense Mutation | ARMC8     | p.S510N  | armadillo repeat contain 79 (0.00)  | 25 (0.32) | 0.85 |
| 12-02 | Gp3 | g.chr8:131127954T>C | Missense Mutation | ASAP1     | p.N698D  | ArfGAP with SH3 dom: 61 (0.00)      | 19 (0.42) | 1.12 |
| 12-02 | Gp3 | g.chr8:131149254G>A | Missense Mutation | ASAP1     | p.L371F  | ArfGAP with SH3 dom: 21 (0.00)      | 12 (0.42) | 1.11 |
| 12-02 | Gp3 | g.chr2:9498901C>G   | Silent            | ASAP2     | p.S448S  | ArfGAP with SH3 dom: 59 (0.00)      | 72 (0.18) | 0.48 |
| 12-02 | Gp3 | g.chr6:100988236C>A | Missense Mutation | ASCC3     | p.V1860L | activating signal cointeg 56 (0.00) | 15 (0.53) | 1.42 |
| 12-02 | Gp3 | g.chr1:155385639C>G | Missense Mutation | ASH1L     | p.L1968F | ash1 (absent, small, or h37 (0.00)  | 52 (0.25) | 0.67 |
| 12-02 | Gp3 | g.chr2:25973096T>C  | Silent            | ASXL2     | p.R443R  | additional sex combs lik 164 (0.00) | 92 (0.14) | 0.38 |
| 12-02 | Gp3 | g.chr12:51203271C>A | Missense Mutation | ATF1      | p.T76K   | activating transcription 152 (0.00) | 39 (0.18) | 0.48 |
| 12-02 | Gp3 | g.chr12:51203274G>A | Missense Mutation | ATF1      | p.R77Q   | activating transcription 151 (0.00) | 39 (0.18) | 0.48 |
| 12-02 | Gp3 | g.chr3:11340197C>T  | Missense Mutation | ATG7      | p.L10F   | autophagy related 7 31 (0.00)       | 18 (0.28) | 0.74 |
| 12-02 | Gp3 | g.chr3:11402250C>A  | Missense Mutation | ATG7      | p.P559T  | autophagy related 7 70 (0.00)       | 31 (0.23) | 0.60 |
| 12-02 | Gp3 | g.chr5:159992538G>C | Nonsense Mutation | ATP10B    | p.Y1436* | ATPase, class V, type 1031 (0.00)   | 31 (0.19) | 0.52 |
| 12-02 | Gp3 | g.chr13:25276103A>G | Missense Mutation | ATP12A    | p.T638A  | ATPase, H+/K+ transpo 18 (0.00)     | 35 (0.14) | 0.38 |
| 12-02 | Gp3 | g.chr3:193039476C>A | Nonsense Mutation | ATP13A5   | p.E637*  | ATPase type 13A5 26 (0.00)          | 35 (0.14) | 0.38 |
| 12-02 | Gp3 | g.chr3:142279163C>T | Missense Mutation | ATR       | p.V495I  | ATR serine/threonine ki 49 (0.00)   | 21 (0.29) | 0.76 |
| 12-02 | Gp3 | g.chr3:48493230G>T  | Missense Mutation | ATRIP     | p.Q159H  | ATR interacting protein 27 (0.00)   | 19 (0.37) | 0.98 |
| 12-02 | Gp3 | g.chr17:47218700G>A | Missense Mutation | B4GALNT2  | p.V36M   | beta-1,4-N-acetyl-galact 41 (0.00)  | 71 (0.17) | 0.54 |
| 12-02 | Gp3 | g.chr14:96731042C>G | Silent            | BDKRB1    | p.S341S  | bradykinin receptor B1 53 (0.00)    | 57 (0.16) | 0.42 |
| 12-02 | Gp3 | g.chr2:32667164G>T  | Nonsense Mutation | BIRC6     | p.E1326* | baculoviral IAP repeat c 100 (0.00) | 19 (0.26) | 0.70 |
| 12-02 | Gp3 | g.chr2:32670588G>T  | Splice Site       | BIRC6     |          | baculoviral IAP repeat c 20 (0.00)  | 29 (0.28) | 0.74 |
| 12-02 | Gp3 | g.chr19:53793356A>T | Missense Mutation | BIRC8     | p.L91Q   | baculoviral IAP repeat c 37 (0.00)  | 51 (0.29) | 0.78 |
| 12-02 | Gp3 | g.chr15:91266392G>T | Intron            | BLM       |          | Bloom syndrome, RecQ 35 (0.00)      | 28 (0.18) | 0.48 |
| 12-02 | Gp3 | g.chr15:91293735C>G | Intron            | BLM       |          | Bloom syndrome, RecQ 97 (0.00)      | 35 (0.17) | 0.46 |
| 12-02 | Gp3 | g.chr15:91341902C>A | Intron            | BLM       |          | Bloom syndrome, RecQ 38 (0.00)      | 68 (0.18) | 0.47 |
| 12-02 | Gp3 | g.chr4:81967497C>A  | Missense Mutation | BMP3      | p.Q308K  | bone morphogenetic pro 29 (0.00)    | 15 (0.33) | 0.89 |

|       |     |                      |                   |           |          |                                    |            |      |
|-------|-----|----------------------|-------------------|-----------|----------|------------------------------------|------------|------|
| 12-02 | Gp3 | g.chr17:41202207G>A  | Intron            | BRCA1     |          | breast cancer 1, early on24 (0.00) | 17 (0.29)  | 0.78 |
| 12-02 | Gp3 | g.chr17:41216145G>A  | Intron            | BRCA1     |          | breast cancer 1, early on27 (0.00) | 24 (0.29)  | 0.78 |
| 12-02 | Gp3 | g.chr17:41216420C>A  | Intron            | BRCA1     |          | breast cancer 1, early on31 (0.00) | 31 (0.32)  | 0.86 |
| 12-02 | Gp3 | g.chr17:41268923C>T  | Intron            | BRCA1     |          | breast cancer 1, early on25 (0.00) | 42 (0.50)  | 1.33 |
| 12-02 | Gp3 | g.chr13:32890373C>G  | Intron            | BRCA2     |          | breast cancer 2, early on21 (0.00) | 73 (0.18)  | 0.47 |
| 12-02 | Gp3 | g.chr13:32894937T>A  | Intron            | BRCA2     |          | breast cancer 2, early on25 (0.00) | 22 (0.45)  | 1.21 |
| 12-02 | Gp3 | g.chr13:32931514G>C  | Intron            | BRCA2     |          | breast cancer 2, early on24 (0.00) | 17 (0.47)  | 1.25 |
| 12-02 | Gp3 | g.chr2:28117470C>A   | Missense Mutation | BRE       | p.P16H   | brain and reproductive c85 (0.00)  | 40 (0.25)  | 0.67 |
| 12-02 | Gp3 | g.chr10:93749100A>T  | Nonsense Mutation | BTAF1     | p.K873*  | BTAF1 RNA polymerase53 (0.00)      | 15 (0.47)  | 1.24 |
| 12-02 | Gp3 | g.chr10:93749115A>T  | Missense Mutation | BTAF1     | p.I878L  | BTAF1 RNA polymerase53 (0.00)      | 14 (0.36)  | 0.95 |
| 12-02 | Gp3 | g.chr10:93749220C>T  | Missense Mutation | BTAF1     | p.P913S  | BTAF1 RNA polymerase49 (0.00)      | 36 (0.44)  | 1.19 |
| 12-02 | Gp3 | g.chr10:103291068C>A | Missense Mutation | BTRC      | p.P273H  | beta-transducin repeat c22 (0.00)  | 24 (0.21)  | 0.56 |
| 12-02 | Gp3 | g.chr6:105577347G>T  | Silent            | BVES      | p.L86L   | blood vessel epicardial s66 (0.00) | 27 (0.26)  | 0.69 |
| 12-02 | Gp3 | g.chr10:98744500C>A  | Missense Mutation | C10orf12  | p.A1118D | chromosome 10 open re54 (0.00)     | 48 (0.27)  | 0.72 |
| 12-02 | Gp3 | g.chr10:127411671G>T | Nonsense Mutation | C10orf137 | p.G118*  | 19 (0.00)                          | 11 (0.73)  | 1.94 |
| 12-02 | Gp3 | g.chr10:102748712G>A | Missense Mutation | C10orf2   | p.G249R  | chromosome 10 open re16 (0.00)     | 14 (0.50)  | 1.33 |
| 12-02 | Gp3 | g.chr11:76253347C>A  | Missense Mutation | C11orf30  | p.T791N  | chromosome 11 open re24 (0.00)     | 47 (0.23)  | 0.62 |
| 12-02 | Gp3 | g.chr11:66581456A>T  | Missense Mutation | C11orf80  | p.I169L  | chromosome 11 open re26 (0.00)     | 56 (0.12)  | 0.44 |
| 12-02 | Gp3 | g.chr11:82643602G>A  | Missense Mutation | C11orf82  | p.G408S  | 33 (0.00)                          | 17 (0.29)  | 0.78 |
| 12-02 | Gp3 | g.chr11:82643681C>A  | Missense Mutation | C11orf82  | p.A434D  | 53 (0.00)                          | 14 (0.43)  | 1.14 |
| 12-02 | Gp3 | g.chr12:64587965T>A  | Missense Mutation | C12orf66  | p.H332L  | chromosome 12 open re51 (0.00)     | 49 (0.16)  | 0.44 |
| 12-02 | Gp3 | g.chr15:73848676G>T  | Missense Mutation | C15orf60  | p.V194L  | 99 (0.00)                          | 68 (0.26)  | 0.71 |
| 12-02 | Gp3 | g.chr16:4790271G>A   | Missense Mutation | C16orf71  | p.E146K  | chromosome 16 open re18 (0.00)     | 45 (0.31)  | 1.15 |
| 12-02 | Gp3 | g.chr17:30660511C>A  | Missense Mutation | C17orf75  | p.M300I  | chromosome 17 open re92 (0.00)     | 92 (0.16)  | 0.43 |
| 12-02 | Gp3 | g.chr1:38149007G>A   | Silent            | C1orf109  | p.H186H  | chromosome 1 open rea30 (0.00)     | 43 (0.26)  | 0.68 |
| 12-02 | Gp3 | g.chr1:109649720G>A  | Missense Mutation | C1orf194  | p.R36C   | chromosome 1 open rea99 (0.00)     | 131 (0.15) | 0.39 |
| 12-02 | Gp3 | g.chr1:109649730G>T  | Missense Mutation | C1orf194  | p.D32E   | chromosome 1 open rea101 (0.00)    | 125 (0.25) | 0.66 |
| 12-02 | Gp3 | g.chr1:152692423C>G  | Missense Mutation | C1orf68   | p.S142R  | chromosome 1 open rea21 (0.00)     | 36 (0.14)  | 0.48 |
| 12-02 | Gp3 | g.chr12:7177888G>A   | Missense Mutation | C1S       | p.R500Q  | complement component 52 (0.00)     | 65 (0.34)  | 0.63 |
| 12-02 | Gp3 | g.chr2:29296933C>A   | Missense Mutation | C2orf71   | p.R65S   | chromosome 2 open rea34 (0.00)     | 35 (0.46)  | 1.22 |
| 12-02 | Gp3 | g.chr3:14725786G>C   | Silent            | C3orf20   | p.V174V  | chromosome 3 open rea22 (0.00)     | 16 (0.31)  | 0.83 |
| 12-02 | Gp3 | g.chr4:81283919G>A   | Silent            | C4orf22   | p.L41L   | chromosome 4 open rea45 (0.00)     | 24 (0.21)  | 0.56 |
| 12-02 | Gp3 | g.chr4:170669928A>G  | Missense Mutation | C4orf27   | p.V155A  | chromosome 4 open rea40 (0.00)     | 19 (0.47)  | 1.26 |
| 12-02 | Gp3 | g.chr5:41199892C>A   | Missense Mutation | C6        | p.K141N  | complement component 53 (0.00)     | 32 (0.50)  | 1.33 |
| 12-02 | Gp3 | g.chr6:36294495T>C   | Silent            | C6orf222  | p.P276P  | chromosome 6 open rea36 (0.00)     | 50 (0.22)  | 0.59 |

|       |     |                     |                   |         |          |                                    |           |      |
|-------|-----|---------------------|-------------------|---------|----------|------------------------------------|-----------|------|
| 12-02 | Gp3 | g.chr5:40979868G>A  | Missense Mutation | C7      | p.R736K  | complement component 60 (0.00)     | 63 (0.16) | 0.42 |
| 12-02 | Gp3 | g.chr9:97718199C>T  | Missense Mutation | C9orf3  | p.L493F  | chromosome 9 open rea37 (0.00)     | 16 (0.50) | 1.60 |
| 12-02 | Gp3 | g.chr9:114521510C>T | Missense Mutation | C9orf84 | p.R20K   | chromosome 9 open rea31 (0.00)     | 36 (0.19) | 0.52 |
| 12-02 | Gp3 | g.chr22:24459472G>T | Missense Mutation | CABIN1  | p.D533Y  | calcineurin binding prot 26 (0.00) | 37 (0.35) | 0.94 |
| 12-02 | Gp3 | g.chr1:181727133G>T | Missense Mutation | CACNA1E | p.M1460I | calcium channel, voltag73 (0.00)   | 97 (0.15) | 0.41 |
| 12-02 | Gp3 | g.chr3:85092116C>A  | Intron            | CADM2   |          | cell adhesion molecule 251 (0.02)  | 48 (0.44) | 1.17 |
| 12-02 | Gp3 | g.chr3:85220097T>A  | Intron            | CADM2   |          | cell adhesion molecule 275 (0.00)  | 19 (0.37) | 0.98 |
| 12-02 | Gp3 | g.chr3:85221888C>A  | Intron            | CADM2   |          | cell adhesion molecule 279 (0.00)  | 32 (0.19) | 0.50 |
| 12-02 | Gp3 | g.chr3:85258504G>T  | Intron            | CADM2   |          | cell adhesion molecule 237 (0.00)  | 23 (0.22) | 0.58 |
| 12-02 | Gp3 | g.chr3:85265097G>T  | Intron            | CADM2   |          | cell adhesion molecule 225 (0.00)  | 45 (0.47) | 1.24 |
| 12-02 | Gp3 | g.chr3:85338882G>A  | Intron            | CADM2   |          | cell adhesion molecule 219 (0.00)  | 17 (0.41) | 1.10 |
| 12-02 | Gp3 | g.chr3:85362316G>A  | Intron            | CADM2   |          | cell adhesion molecule 239 (0.00)  | 36 (0.39) | 1.04 |
| 12-02 | Gp3 | g.chr3:85404010G>A  | Intron            | CADM2   |          | cell adhesion molecule 281 (0.00)  | 51 (0.25) | 0.68 |
| 12-02 | Gp3 | g.chr3:85437794T>A  | Intron            | CADM2   |          | cell adhesion molecule 233 (0.00)  | 45 (0.16) | 0.41 |
| 12-02 | Gp3 | g.chr3:85456513G>C  | Intron            | CADM2   |          | cell adhesion molecule 2158 (0.00) | 39 (0.28) | 0.75 |
| 12-02 | Gp3 | g.chr3:85472954A>T  | Intron            | CADM2   |          | cell adhesion molecule 253 (0.00)  | 37 (0.19) | 0.50 |
| 12-02 | Gp3 | g.chr3:85480578C>T  | Intron            | CADM2   |          | cell adhesion molecule 244 (0.00)  | 28 (0.54) | 1.43 |
| 12-02 | Gp3 | g.chr3:85591539T>G  | Intron            | CADM2   |          | cell adhesion molecule 283 (0.00)  | 35 (0.14) | 0.38 |
| 12-02 | Gp3 | g.chr3:85591549C>T  | Intron            | CADM2   |          | cell adhesion molecule 253 (0.00)  | 38 (0.16) | 0.42 |
| 12-02 | Gp3 | g.chr3:85802714A>T  | Intron            | CADM2   |          | cell adhesion molecule 238 (0.00)  | 42 (0.31) | 0.83 |
| 12-02 | Gp3 | g.chr3:85830168C>A  | Intron            | CADM2   |          | cell adhesion molecule 258 (0.00)  | 29 (0.21) | 0.55 |
| 12-02 | Gp3 | g.chr3:85837215T>A  | Intron            | CADM2   |          | cell adhesion molecule 263 (0.00)  | 27 (0.30) | 0.79 |
| 12-02 | Gp3 | g.chr3:85869532G>T  | Intron            | CADM2   |          | cell adhesion molecule 274 (0.00)  | 23 (0.30) | 0.81 |
| 12-02 | Gp3 | g.chr3:85870500C>T  | Intron            | CADM2   |          | cell adhesion molecule 243 (0.00)  | 39 (0.46) | 1.23 |
| 12-02 | Gp3 | g.chr3:85872649C>A  | Intron            | CADM2   |          | cell adhesion molecule 2116 (0.00) | 41 (0.22) | 0.59 |
| 12-02 | Gp3 | g.chr3:85899077G>A  | Intron            | CADM2   |          | cell adhesion molecule 222 (0.00)  | 23 (0.22) | 0.58 |
| 12-02 | Gp3 | g.chr3:85912692C>T  | Intron            | CADM2   |          | cell adhesion molecule 227 (0.00)  | 25 (0.20) | 0.53 |
| 12-02 | Gp3 | g.chr3:85931489C>A  | Intron            | CADM2   |          | cell adhesion molecule 250 (0.00)  | 30 (0.20) | 0.53 |
| 12-02 | Gp3 | g.chr3:85932976C>T  | Intron            | CADM2   |          | cell adhesion molecule 267 (0.00)  | 24 (0.25) | 0.67 |
| 12-02 | Gp3 | g.chr3:85953582C>T  | Intron            | CADM2   |          | cell adhesion molecule 276 (0.00)  | 22 (0.23) | 0.61 |
| 12-02 | Gp3 | g.chr3:86022566G>T  | Intron            | CADM2   |          | cell adhesion molecule 262 (0.00)  | 31 (0.16) | 0.43 |
| 12-02 | Gp3 | g.chr3:86022585G>T  | Intron            | CADM2   |          | cell adhesion molecule 232 (0.00)  | 17 (0.35) | 0.94 |
| 12-02 | Gp3 | g.chr3:86043867G>T  | Intron            | CADM2   |          | cell adhesion molecule 250 (0.02)  | 34 (0.32) | 0.86 |
| 12-02 | Gp3 | g.chr3:86050383C>G  | Intron            | CADM2   |          | cell adhesion molecule 284 (0.00)  | 69 (0.14) | 0.39 |
| 12-02 | Gp3 | g.chr3:86050644T>A  | Intron            | CADM2   |          | cell adhesion molecule 262 (0.00)  | 44 (0.18) | 0.48 |

|       |     |                      |                   |           |          |                                                |            |      |
|-------|-----|----------------------|-------------------|-----------|----------|------------------------------------------------|------------|------|
| 12-02 | Gp3 | g.chr3:86062265C>A   | Intron            | CADM2     |          | cell adhesion molecule 223 (0.00)              | 68 (0.15)  | 0.39 |
| 12-02 | Gp3 | g.chr3:86105340G>A   | Intron            | CADM2     |          | cell adhesion molecule 298 (0.00)              | 18 (0.50)  | 1.33 |
| 12-02 | Gp3 | g.chr7:121985693G>A  | Missense Mutation | CADPS2    | p.R1142W | Ca <sup>++</sup> -dependent secretin 82 (0.00) | 31 (0.26)  | 0.69 |
| 12-02 | Gp3 | g.chr3:48266863C>G   | Silent            | CAMP      | p.V157V  | cathelicidin antimicrobial 36 (0.00)           | 43 (0.19)  | 0.50 |
| 12-02 | Gp3 | g.chr11:64978328C>A  | Silent            | CAPN1     | p.T701T  | calpain 1, (mu/I) large subunit 20 (0.00)      | 116 (0.20) | 0.69 |
| 12-02 | Gp3 | g.chr12:30869499G>C  | Missense Mutation | CAPRN2    | p.P768A  | caprin family member 2 35 (0.00)               | 25 (0.32)  | 0.85 |
| 12-02 | Gp3 | g.chr12:30869589G>A  | Silent            | CAPRN2    | p.L738L  | caprin family member 2 43 (0.00)               | 38 (0.50)  | 1.33 |
| 12-02 | Gp3 | g.chr12:30906390G>T  | Missense Mutation | CAPRN2    | p.P103H  | caprin family member 2 25 (0.00)               | 34 (0.18)  | 0.47 |
| 12-02 | Gp3 | g.chr13:111353817C>A | Missense Mutation | CARS2     | p.V121L  | cysteinyl-tRNA synthetase 67 (0.00)            | 46 (0.22)  | 0.58 |
| 12-02 | Gp3 | g.chr12:25263171G>T  | Missense Mutation | CASC1     | p.P595T  | cancer susceptibility carcinoma 41 (0.00)      | 10 (0.90)  | 2.40 |
| 12-02 | Gp3 | g.chr2:202149705C>A  | Silent            | CASP8     | p.I382I  | caspase 8, apoptosis-related 45 (0.00)         | 23 (0.30)  | 0.81 |
| 12-02 | Gp3 | g.chr2:202149719G>A  | Missense Mutation | CASP8     | p.G387E  | caspase 8, apoptosis-related 47 (0.00)         | 21 (0.33)  | 0.89 |
| 12-02 | Gp3 | g.chr6:90566808C>T   | RNA               | CASP8AP2  |          | caspase 8 associated protein 31 (0.00)         | 40 (0.20)  | 0.53 |
| 12-02 | Gp3 | g.chr6:90572272C>A   | RNA               | CASP8AP2  |          | caspase 8 associated protein 97 (0.00)         | 145 (0.17) | 0.44 |
| 12-02 | Gp3 | g.chr1:26524225C>G   | Missense Mutation | CATSPER4  | p.R170G  | cation channel, sperm associated 19 (0.00)     | 64 (0.30)  | 0.99 |
| 12-02 | Gp3 | g.chr14:92088185T>A  | Missense Mutation | CATSPERB  | p.N676I  | catsper channel auxiliary 51 (0.00)            | 35 (0.14)  | 0.38 |
| 12-02 | Gp3 | g.chr7:107399174C>T  | Missense Mutation | CBLL1     | p.P343S  | Cbl proto-oncogene-like 31 (0.00)              | 12 (0.42)  | 1.11 |
| 12-02 | Gp3 | g.chr14:24897018C>A  | Missense Mutation | CBLN3     | p.G148C  | cerebellin 3 precursor 44 (0.00)               | 143 (0.15) | 0.39 |
| 12-02 | Gp3 | g.chr1:52828401C>T   | Silent            | CC2D1B    | p.E29E   | coiled-coil and C2 domain 19 (0.00)            | 30 (0.27)  | 0.71 |
| 12-02 | Gp3 | g.chr2:219900333C>T  | Silent            | CCDC108   | p.V137V  | coiled-coil domain containing 40 (0.00)        | 18 (0.56)  | 1.48 |
| 12-02 | Gp3 | g.chr2:179912034C>G  | Missense Mutation | CCDC141   | p.E68Q   | coiled-coil domain containing 102 (0.00)       | 24 (0.33)  | 0.52 |
| 12-02 | Gp3 | g.chr17:20230400G>T  | RNA               | CCDC144CP |          | coiled-coil domain containing 15 (0.00)        | 20 (0.30)  | 0.80 |
| 12-02 | Gp3 | g.chr11:124824666C>A | Missense Mutation | CCDC15    | p.T13N   | coiled-coil domain containing 43 (0.00)        | 53 (0.23)  | 0.60 |
| 12-02 | Gp3 | g.chr11:124824709C>A | Missense Mutation | CCDC15    | p.D27E   | coiled-coil domain containing 42 (0.00)        | 52 (0.23)  | 0.62 |
| 12-02 | Gp3 | g.chr4:77305725C>A   | Missense Mutation | CCDC158   | p.A128S  | coiled-coil domain containing 62 (0.00)        | 18 (0.39)  | 1.04 |
| 12-02 | Gp3 | g.chr1:169390848G>A  | Missense Mutation | CCDC181   | p.A274V  | coiled-coil domain containing 71 (0.00)        | 38 (0.24)  | 0.63 |
| 12-02 | Gp3 | g.chr1:169390877G>A  | Silent            | CCDC181   | p.V264V  | coiled-coil domain containing 67 (0.00)        | 43 (0.21)  | 0.56 |
| 12-02 | Gp3 | g.chr11:93088627G>C  | Missense Mutation | CCDC67    | p.M40I   | coiled-coil domain containing 146 (0.00)       | 50 (0.16)  | 0.43 |
| 12-02 | Gp3 | g.chr12:91347464C>A  | Missense Mutation | CCER1     | p.Q352H  | coiled-coil glutamate-rich 46 (0.00)           | 48 (0.17)  | 0.44 |
| 12-02 | Gp3 | g.chr4:77987414C>G   | Missense Mutation | CCNI      | p.M34I   | cyclin I 45 (0.00)                             | 36 (0.17)  | 0.44 |
| 12-02 | Gp3 | g.chr6:74497065G>A   | Missense Mutation | CD109     | p.A816T  | CD109 molecule 44 (0.00)                       | 29 (0.34)  | 0.92 |
| 12-02 | Gp3 | g.chr12:7647748C>T   | Nonsense Mutation | CD163     | p.W450*  | CD163 molecule 81 (0.00)                       | 36 (0.28)  | 0.52 |
| 12-02 | Gp3 | g.chr12:7647887G>T   | Missense Mutation | CD163     | p.L404M  | CD163 molecule 61 (0.00)                       | 32 (0.34)  | 0.64 |
| 12-02 | Gp3 | g.chr19:7807938G>T   | Missense Mutation | CD209     | p.P401H  | CD209 molecule 33 (0.00)                       | 36 (0.17)  | 0.62 |
| 12-02 | Gp3 | g.chr1:160654923C>A  | Nonsense Mutation | CD48      | p.E47*   | CD48 molecule 17 (0.00)                        | 16 (0.62)  | 1.67 |

|       |     |                     |                   |         |          |                           |            |            |      |
|-------|-----|---------------------|-------------------|---------|----------|---------------------------|------------|------------|------|
| 12-02 | Gp3 | g.chr5:19473673G>T  | Missense Mutation | CDH18   | p.P679T  | cadherin 18, type 2       | 100 (0.00) | 42 (0.12)  | 0.41 |
| 12-02 | Gp3 | g.chr20:58557977G>T | Splice Site       | CDH26   |          | cadherin 26               | 57 (0.00)  | 18 (0.33)  | 0.89 |
| 12-02 | Gp3 | g.chr5:31294336G>T  | Missense Mutation | CDH6    | p.A166S  | cadherin 6, type 2, K-ca  | 57 (0.00)  | 12 (0.42)  | 1.11 |
| 12-02 | Gp3 | g.chr5:26903797G>C  | Missense Mutation | CDH9    | p.F316L  | cadherin 9, type 2 (T1-c  | 32 (0.00)  | 41 (0.59)  | 2.03 |
| 12-02 | Gp3 | g.chr7:105603783C>T | Missense Mutation | CDHR3   | p.L7F    | cadherin-related family   | 43 (0.00)  | 35 (0.29)  | 0.76 |
| 12-02 | Gp3 | g.chr7:105658337C>T | Missense Mutation | CDHR3   | p.P491L  | cadherin-related family   | 28 (0.00)  | 30 (0.17)  | 0.44 |
| 12-02 | Gp3 | g.chr7:40133798G>A  | Missense Mutation | CDK13   | p.R1253Q | cyclin-dependent kinase   | 72 (0.01)  | 30 (0.17)  | 0.44 |
| 12-02 | Gp3 | g.chr22:18018355G>A | Missense Mutation | CECR2   | p.D272N  | cat eye syndrome chrom    | 32 (0.00)  | 36 (0.28)  | 0.96 |
| 12-02 | Gp3 | g.chr11:47508319T>A | Missense Mutation | CELF1   | p.D98V   | CUGBP, Elav-like fami     | 32 (0.00)  | 50 (0.28)  | 0.75 |
| 12-02 | Gp3 | g.chr1:214787190G>A | Silent            | CENPF   | p.K31K   | centromere protein F, 3   | 31 (0.00)  | 21 (0.24)  | 0.63 |
| 12-02 | Gp3 | g.chr9:95375347C>A  | Missense Mutation | CENPP   | p.S261R  | centromere protein P      | 46 (0.00)  | 34 (0.44)  | 1.18 |
| 12-02 | Gp3 | g.chr1:243385051A>G | Missense Mutation | CEP170  | p.V57A   | centrosomal protein 170   | 29 (0.00)  | 34 (0.21)  | 0.55 |
| 12-02 | Gp3 | g.chr1:179993618G>T | Missense Mutation | CEP350  | p.D1151Y | centrosomal protein 350   | 24 (0.00)  | 25 (0.36)  | 0.96 |
| 12-02 | Gp3 | g.chr17:62529082G>A | Missense Mutation | CEP95   | p.E600K  | centrosomal protein 95k   | 92 (0.00)  | 49 (0.16)  | 0.44 |
| 12-02 | Gp3 | g.chr1:111703849T>A | Missense Mutation | CEPT1   | p.F187Y  | choline/ethanolamine pl   | 56 (0.00)  | 18 (0.44)  | 1.19 |
| 12-02 | Gp3 | g.chr5:98245171C>T  | Intron            | CHD1    |          | chromodomain helicase     | 58 (0.00)  | 51 (0.24)  | 0.63 |
| 12-02 | Gp3 | g.chr5:98258899C>G  | Intron            | CHD1    |          | chromodomain helicase     | 26 (0.00)  | 65 (0.17)  | 0.45 |
| 12-02 | Gp3 | g.chr12:6680080A>G  | Silent            | CHD4    | p.I1917I | chromodomain helicase     | 73 (0.00)  | 25 (0.24)  | 0.45 |
| 12-02 | Gp3 | g.chr12:6704542C>A  | Missense Mutation | CHD4    | p.K690N  | chromodomain helicase     | 68 (0.00)  | 14 (0.36)  | 0.66 |
| 12-02 | Gp3 | g.chr1:6210803C>T   | Intron            | CHD5    |          | chromodomain helicase     | 19 (0.00)  | 35 (0.20)  | 0.53 |
| 12-02 | Gp3 | g.chr16:53301341C>A | Missense Mutation | CHD9    | p.R1486S | chromodomain helicase     | 180 (0.01) | 35 (0.57)  | 0.74 |
| 12-02 | Gp3 | g.chr18:24496571G>A | Silent            | CHST9   | p.V328V  | carbohydrate (N-acetylgl  | 23 (0.00)  | 22 (0.45)  | 1.21 |
| 12-02 | Gp3 | g.chr15:65489731C>A | Nonsense Mutation | CILP    | p.E965*  | cartilage intermediate la | 18 (0.00)  | 52 (0.15)  | 0.41 |
| 12-02 | Gp3 | g.chr2:122205862G>T | Silent            | CLASP1  | p.T577T  | cytoplasmic linker assoc  | 20 (0.00)  | 23 (0.22)  | 0.39 |
| 12-02 | Gp3 | g.chr19:45573813C>T | Missense Mutation | CLASRP  | p.S659F  | CLK4-associating serin    | 20 (0.00)  | 87 (0.29)  | 1.09 |
| 12-02 | Gp3 | g.chr19:40225024C>A | Nonsense Mutation | CLC     | p.E68*   | Charcot-Leyden crystal    | 38 (0.00)  | 64 (0.11)  | 0.38 |
| 12-02 | Gp3 | g.chr1:11875953G>T  | Missense Mutation | CLCN6   | p.E66D   | chloride channel, voltag  | 29 (0.00)  | 24 (0.25)  | 0.67 |
| 12-02 | Gp3 | g.chr12:8672900C>T  | Missense Mutation | CLEC4D  | p.R155C  | C-type lectin domain fai  | 22 (0.00)  | 24 (0.25)  | 0.46 |
| 12-02 | Gp3 | g.chr22:19223265G>A | Missense Mutation | CLTCL1  | p.P308L  | clathrin, heavy chain-lik | 82 (0.00)  | 116 (0.20) | 0.68 |
| 12-02 | Gp3 | g.chr6:37411778C>A  | Missense Mutation | CMTR1   | p.S46Y   | cap methyltransferase 1   | 37 (0.00)  | 14 (0.36)  | 0.95 |
| 12-02 | Gp3 | g.chr8:87588116T>A  | Missense Mutation | CNGB3   | p.Q782H  | cyclic nucleotide gated   | 73 (0.01)  | 43 (0.23)  | 0.62 |
| 12-02 | Gp3 | g.chr2:68544265C>A  | Missense Mutation | CNRIP1  | p.R118S  | cannabinoid receptor int  | 37 (0.00)  | 35 (0.14)  | 0.38 |
| 12-02 | Gp3 | g.chr3:2777934G>C   | Missense Mutation | CNTN4   | p.E31Q   | contactin 4               | 71 (0.00)  | 55 (0.55)  | 1.45 |
| 12-02 | Gp3 | g.chr3:1424745C>T   | Silent            | CNTN6   | p.V762V  | contactin 6               | 44 (0.00)  | 20 (0.60)  | 1.60 |
| 12-02 | Gp3 | g.chr6:70850853C>A  | Missense Mutation | COL19A1 | p.P485H  | collagen, type XIX, alph  | 38 (0.00)  | 46 (0.80)  | 2.14 |

|       |     |                     |                   |             |          |                                                        |            |           |      |
|-------|-----|---------------------|-------------------|-------------|----------|--------------------------------------------------------|------------|-----------|------|
| 12-02 | Gp3 | g.chr6:56044706C>A  | Missense Mutation | COL21A1     | p.V104L  | collagen, type XXI, alpha 75 (0.00)                    | 20 (0.35)  | 0.93      |      |
| 12-02 | Gp3 | g.chr1:86249945C>G  | Missense Mutation | COL24A1     | p.Q1388H | collagen, type XXIV, alpha 46 (0.00)                   | 26 (0.27)  | 0.72      |      |
| 12-02 | Gp3 | g.chr9:116956714G>C | Missense Mutation | COL27A1     | p.G683R  | collagen, type XXVII, alpha 24 (0.00)                  | 15 (0.40)  | 1.07      |      |
| 12-02 | Gp3 | g.chr2:228159707G>A | Missense Mutation | COL4A3      | p.G1149E | collagen, type IV, alpha 147 (0.00)                    | 80 (0.29)  | 0.77      |      |
| 12-02 | Gp3 | g.chr2:228173717G>T | Missense Mutation | COL4A3      | p.W1522L | collagen, type IV, alpha 36 (0.00)                     | 40 (0.15)  | 0.40      |      |
| 12-02 | Gp3 | g.chr3:130292950A>T | Missense Mutation | COL6A6      | p.Q1043L | collagen, type VI, alpha 84 (0.00)                     | 47 (0.19)  | 0.51      |      |
| 12-02 | Gp3 | g.chr3:130305424G>T | Nonsense Mutation | COL6A6      | p.E1349* | collagen, type VI, alpha 164 (0.00)                    | 137 (0.20) | 0.53      |      |
| 12-02 | Gp3 | g.chr11:14501200G>A | Missense Mutation | COPB1       | p.R425C  | coatamer protein complex 80 (0.00)                     | 33 (0.21)  | 0.57      |      |
| 12-02 | Gp3 | g.chr3:139080043C>A | Missense Mutation | COPB2       | p.G697V  | coatamer protein complex 64 (0.00)                     | 33 (0.48)  | 1.29      |      |
| 12-02 | Gp3 | g.chr9:100899930T>C | Missense Mutation | CORO2A      | p.H81R   | coronin, actin binding protein 40 (0.00)               | 41 (0.17)  | 0.46      |      |
| 12-02 | Gp3 | g.chr8:100904156C>T | Missense Mutation | COX6C       | p.G32R   | cytochrome c oxidase subunit 117 (0.00)                | 55 (0.35)  | 0.92      |      |
| 12-02 | Gp3 | g.chr2:9588410C>G   | Missense Mutation | CPSF3       | p.H442Q  | cleavage and polyadenylation factor 30 (0.00)          | 23 (0.35)  | 0.93      |      |
| 12-02 | Gp3 | g.chr1:207680076C>A | Missense Mutation | CR1         | p.P107T  | complement component 98 (0.00)                         | 47 (0.32)  | 0.85      |      |
| 12-02 | Gp3 | g.chr2:209007629G>A | Silent            | CRYGB       | p.G87G   | crystallin, gamma B 60 (0.00)                          | 33 (0.58)  | 1.54      |      |
| 12-02 | Gp3 | g.chr8:2965247G>T   | Missense Mutation | CSMD1       | p.F2277L | CUB and Sushi multiple domain 46 (0.00)                | 23 (0.35)  | 0.93      |      |
| 12-02 | Gp3 | g.chr8:68049813C>G  | Silent            | CSPP1       | p.L645L  | centrosome and spindle pole body 22 (0.00)             | 12 (0.75)  | 2.00      |      |
| 12-02 | Gp3 | g.chr18:19995815C>G | Missense Mutation | CTAGE1      | p.E654Q  | cutaneous T-cell lymphoma-associated antigen 46 (0.00) | 27 (0.33)  | 0.89      |      |
| 12-02 | Gp3 | g.chr18:19996503G>T | Silent            | CTAGE1      | p.L424L  | cutaneous T-cell lymphoma-associated antigen 67 (0.00) | 28 (0.18)  | 0.48      |      |
| 12-02 | Gp3 | g.chr18:19997438G>A | Missense Mutation | CTAGE1      | p.H113Y  | cutaneous T-cell lymphoma-associated antigen 71 (0.00) | 35 (0.17)  | 0.46      |      |
| 12-02 | Gp3 | g.chr19:20368624C>A | RNA               | CTC-260E6.6 |          |                                                        | 24 (0.00)  | 20 (0.40) | 1.39 |
| 12-02 | Gp3 | g.chr19:20370065G>T | RNA               | CTC-260E6.6 |          |                                                        | 78 (0.00)  | 62 (0.34) | 1.17 |
| 12-02 | Gp3 | g.chr19:20405969G>A | RNA               | CTC-260E6.6 |          |                                                        | 45 (0.00)  | 49 (0.24) | 0.85 |
| 12-02 | Gp3 | g.chr11:10785366G>A | Missense Mutation | CTR9        | p.M378I  | CTR9, Paf1/RNA polymerase 69 (0.00)                    | 77 (0.31)  | 0.83      |      |
| 12-02 | Gp3 | g.chr17:36971241C>A | Nonsense Mutation | CWC25       | p.E101*  | CWC25 spliceosome-associated protein 32 (0.00)         | 26 (0.19)  | 0.51      |      |
| 12-02 | Gp3 | g.chr19:41386040C>G | Silent            | CYP2A7      | p.L201L  | cytochrome P450, family 15 (0.00)                      | 81 (0.21)  | 0.74      |      |
| 12-02 | Gp3 | g.chr19:15734190G>T | RNA               | CYP4F8      |          | cytochrome P450, family 50 (0.00)                      | 36 (0.14)  | 0.48      |      |
| 12-02 | Gp3 | g.chr9:124345213C>G | Intron            | DAB2IP      |          | DAB2 interacting protein 22 (0.00)                     | 39 (0.15)  | 0.41      |      |
| 12-02 | Gp3 | g.chr9:124352024C>A | Intron            | DAB2IP      |          | DAB2 interacting protein 24 (0.00)                     | 18 (0.28)  | 0.74      |      |
| 12-02 | Gp3 | g.chr9:124360008G>T | Intron            | DAB2IP      |          | DAB2 interacting protein 63 (0.00)                     | 104 (0.19) | 0.51      |      |
| 12-02 | Gp3 | g.chr9:124378863C>T | Intron            | DAB2IP      |          | DAB2 interacting protein 50 (0.00)                     | 62 (0.27)  | 0.73      |      |
| 12-02 | Gp3 | g.chr9:124382859T>A | Intron            | DAB2IP      |          | DAB2 interacting protein 31 (0.00)                     | 80 (0.15)  | 0.40      |      |
| 12-02 | Gp3 | g.chr9:124386401C>A | Intron            | DAB2IP      |          | DAB2 interacting protein 39 (0.00)                     | 46 (0.15)  | 0.41      |      |
| 12-02 | Gp3 | g.chr9:124417728G>T | Intron            | DAB2IP      |          | DAB2 interacting protein 16 (0.00)                     | 22 (0.32)  | 0.85      |      |
| 12-02 | Gp3 | g.chr9:124446197G>T | Intron            | DAB2IP      |          | DAB2 interacting protein 41 (0.00)                     | 88 (0.20)  | 0.55      |      |
| 12-02 | Gp3 | g.chr9:124488107G>A | Intron            | DAB2IP      |          | DAB2 interacting protein 17 (0.00)                     | 58 (0.22)  | 0.60      |      |



|       |     |                      |                   |         |          |                          |            |            |      |
|-------|-----|----------------------|-------------------|---------|----------|--------------------------|------------|------------|------|
| 12-02 | Gp3 | g.chr9:124489428C>G  | Intron            | DAB2IP  |          | DAB2 interacting protei  | 52 (0.00)  | 36 (0.19)  | 0.52 |
| 12-02 | Gp3 | g.chr9:124518877C>A  | Intron            | DAB2IP  |          | DAB2 interacting protei  | 15 (0.00)  | 142 (0.14) | 0.38 |
| 12-02 | Gp3 | g.chr8:104453695G>A  | Missense Mutation | DCAF13  | p.E519K  | DDB1 and CUL4 associ     | 51 (0.00)  | 37 (0.19)  | 0.50 |
| 12-02 | Gp3 | g.chr10:14950782C>A  | Silent            | DCLRE1C | p.G568G  | DNA cross-link repair    | 160 (0.00) | 18 (0.28)  | 0.74 |
| 12-02 | Gp3 | g.chr1:112308953T>C  | Missense Mutation | DDX20   | p.I636T  | DEAD (Asp-Glu-Ala-A      | 25 (0.00)  | 16 (0.38)  | 1.00 |
| 12-02 | Gp3 | g.chr12:49227201C>G  | Missense Mutation | DDX23   | p.M554I  | DEAD (Asp-Glu-Ala-A      | 30 (0.00)  | 40 (0.15)  | 0.40 |
| 12-02 | Gp3 | g.chr12:49230747G>T  | Silent            | DDX23   | p.R314R  | DEAD (Asp-Glu-Ala-A      | 36 (0.00)  | 97 (0.15)  | 0.41 |
| 12-02 | Gp3 | g.chr20:47839898G>A  | Missense Mutation | DDX27   | p.E163K  | DEAD (Asp-Glu-Ala-A      | 76 (0.01)  | 40 (0.35)  | 0.93 |
| 12-02 | Gp3 | g.chr5:134120145G>T  | Missense Mutation | DDX46   | p.G419V  | DEAD (Asp-Glu-Ala-A      | 51 (0.00)  | 48 (0.21)  | 0.56 |
| 12-02 | Gp3 | g.chr11:118630702G>T | Missense Mutation | DDX6    | p.L265I  | DEAD (Asp-Glu-Ala-A      | 31 (0.00)  | 10 (0.50)  | 1.33 |
| 12-02 | Gp3 | g.chr4:169343746G>T  | Missense Mutation | DDX60L  | p.H725N  | DEAD (Asp-Glu-Ala-A      | 63 (0.00)  | 30 (0.23)  | 0.62 |
| 12-02 | Gp3 | g.chr22:32293567C>G  | Missense Mutation | DEPDC5  | p.L1426V | DEP domain containing    | 27 (0.00)  | 22 (0.36)  | 0.97 |
| 12-02 | Gp3 | g.chr1:10523648C>G   | Silent            | DFFA    | p.L157L  | DNA fragmentation fact   | 20 (0.00)  | 44 (0.23)  | 0.61 |
| 12-02 | Gp3 | g.chr22:20074154C>A  | Missense Mutation | DGCR8   | p.A223E  | DGCR8 microprocessor     | 54 (0.00)  | 286 (0.15) | 0.52 |
| 12-02 | Gp3 | g.chr2:234343109G>T  | Silent            | DGKD    | p.V144V  | diacylglycerol kinase, d | 17 (0.00)  | 24 (0.46)  | 1.22 |
| 12-02 | Gp3 | g.chr1:26764725C>A   | Missense Mutation | DHDDS   | p.Q44K   | dehydrodolichyl diphos   | 45 (0.00)  | 63 (0.14)  | 0.47 |
| 12-02 | Gp3 | g.chr14:24429198G>T  | Nonsense Mutation | DHRS4   | p.E132*  | dehydrogenase/reductas   | 26 (0.00)  | 11 (0.55)  | 1.45 |
| 12-02 | Gp3 | g.chr10:12160844C>T  | Silent            | DHTKD1  | p.I833I  | dehydrogenase E1 and t   | 61 (0.00)  | 132 (0.15) | 0.40 |
| 12-02 | Gp3 | g.chr21:47954555C>A  | Missense Mutation | DIP2A   | p.L529M  | DIP2 disco-interacting   | 52 (0.00)  | 41 (0.17)  | 0.61 |
| 12-02 | Gp3 | g.chr12:51125183C>A  | Missense Mutation | DIP2B   | p.P1225T | DIP2 disco-interacting   | 54 (0.00)  | 29 (0.24)  | 0.64 |
| 12-02 | Gp3 | g.chr12:51125215C>A  | Silent            | DIP2B   | p.L1235L | DIP2 disco-interacting   | 54 (0.00)  | 26 (0.19)  | 0.51 |
| 12-02 | Gp3 | g.chr12:51127918G>A  | Splice Site       | DIP2B   | p.G1328R | DIP2 disco-interacting   | 54 (0.00)  | 18 (0.28)  | 0.74 |
| 12-02 | Gp3 | g.chr12:51127936C>A  | Missense Mutation | DIP2B   | p.P1334T | DIP2 disco-interacting   | 54 (0.00)  | 18 (0.28)  | 0.74 |
| 12-02 | Gp3 | g.chr3:38129832C>A   | Missense Mutation | DLEC1   | p.L540M  | deleted in lung and esop | 18 (0.00)  | 14 (0.71)  | 1.90 |
| 12-02 | Gp3 | g.chr3:38129836C>A   | Missense Mutation | DLEC1   | p.P541H  | deleted in lung and esop | 18 (0.00)  | 14 (0.71)  | 1.90 |
| 12-02 | Gp3 | g.chr14:55636201C>A  | Silent            | DLGAP5  | p.L488L  | discs, large (Drosophila | 29 (0.00)  | 33 (0.15)  | 0.40 |
| 12-02 | Gp3 | g.chr12:124350525G>A | Missense Mutation | DNAH10  | p.A2240T | dynein, axonemal, heav   | 38 (0.00)  | 18 (0.39)  | 0.62 |
| 12-02 | Gp3 | g.chr7:21584685G>A   | Missense Mutation | DNAH11  | p.G138E  | dynein, axonemal, heav   | 87 (0.01)  | 39 (0.28)  | 0.75 |
| 12-02 | Gp3 | g.chr7:21657342C>T   | Nonsense Mutation | DNAH11  | p.Q1401* | dynein, axonemal, heav   | 54 (0.00)  | 35 (0.46)  | 1.22 |
| 12-02 | Gp3 | g.chr7:21892211G>A   | Missense Mutation | DNAH11  | p.E3675K | dynein, axonemal, heav   | 66 (0.00)  | 32 (0.28)  | 0.75 |
| 12-02 | Gp3 | g.chr3:57335933G>A   | Missense Mutation | DNAH12  | p.L2874F | dynein, axonemal, heav   | 20 (0.00)  | 15 (0.33)  | 0.89 |
| 12-02 | Gp3 | g.chr16:21014437C>A  | Missense Mutation | DNAH3   | p.A2039S | dynein, axonemal, heav   | 48 (0.00)  | 26 (0.19)  | 0.51 |
| 12-02 | Gp3 | g.chr2:84954888C>A   | Silent            | DNAH6   | p.V3356V | dynein, axonemal, heav   | 74 (0.00)  | 44 (0.25)  | 0.67 |
| 12-02 | Gp3 | g.chr2:196636563C>A  | Missense Mutation | DNAH7   | p.V3752F | dynein, axonemal, heav   | 82 (0.00)  | 20 (0.30)  | 0.80 |
| 12-02 | Gp3 | g.chr2:196771469C>T  | Missense Mutation | DNAH7   | p.E1417K | dynein, axonemal, heav   | 43 (0.00)  | 31 (0.35)  | 0.95 |

|       |     |                      |                   |         |          |                                     |            |      |
|-------|-----|----------------------|-------------------|---------|----------|-------------------------------------|------------|------|
| 12-02 | Gp3 | g.chr1:78481827C>A   | Missense Mutation | DNAJB4  | p.P304T  | DnaJ (Hsp40) homolog, 41 (0.00)     | 22 (0.23)  | 0.61 |
| 12-02 | Gp3 | g.chr7:102953424C>A  | Missense Mutation | DNAJC2  | p.R587S  | DnaJ (Hsp40) homolog, 93 (0.00)     | 86 (0.27)  | 0.71 |
| 12-02 | Gp3 | g.chr17:40146922G>A  | Missense Mutation | DNAJC7  | p.A149V  | DnaJ (Hsp40) homolog, 68 (0.00)     | 47 (0.28)  | 0.99 |
| 12-02 | Gp3 | g.chr1:94342611G>A   | Nonsense Mutation | DNTTIP2 | p.Q294*  | deoxynucleotidyltransfe 56 (0.00)   | 23 (0.70)  | 1.86 |
| 12-02 | Gp3 | g.chr10:129242509A>G | Silent            | DOCK1   | p.T1772T | dedicator of cytokinesis 41 (0.00)  | 33 (0.15)  | 0.40 |
| 12-02 | Gp3 | g.chrX:117814575T>C  | Missense Mutation | DOCK11  | p.V1864A | dedicator of cytokinesis 106 (0.00) | 27 (0.63)  | 1.05 |
| 12-02 | Gp3 | g.chr7:111387401C>A  | Missense Mutation | DOCK4   | p.Q1496H | dedicator of cytokinesis 103 (0.00) | 79 (0.23)  | 0.61 |
| 12-02 | Gp3 | g.chr8:25216521G>T   | Missense Mutation | DOCK5   | p.D965Y  | dedicator of cytokinesis 30 (0.00)  | 26 (0.23)  | 0.62 |
| 12-02 | Gp3 | g.chr18:67266663G>C  | Missense Mutation | DOK6    | p.R73P   | docking protein 6 116 (0.00)        | 79 (0.23)  | 0.61 |
| 12-02 | Gp3 | g.chr15:65793030C>A  | Missense Mutation | DPP8    | p.D170Y  | dipeptidyl-peptidase 8 36 (0.00)    | 39 (0.28)  | 0.75 |
| 12-02 | Gp3 | g.chr3:109028053G>A  | Silent            | DPPA2   | p.D102D  | developmental pluripote 29 (0.00)   | 77 (0.18)  | 0.48 |
| 12-02 | Gp3 | g.chr19:32954790G>A  | Nonsense Mutation | DPY19L3 | p.W487*  | dpy-19-like 3 (C. elegan 114 (0.01) | 40 (0.30)  | 0.80 |
| 12-02 | Gp3 | g.chr5:146785246G>A  | Silent            | DPYSL3  | p.T246T  | dihydropyrimidinase-lik 31 (0.00)   | 51 (0.27)  | 0.73 |
| 12-02 | Gp3 | g.chr18:65180559G>T  | Silent            | DSEL    | p.T439T  | dermatan sulfate epimer 26 (0.00)   | 23 (0.22)  | 0.58 |
| 12-02 | Gp3 | g.chr6:7568742C>A    | Missense Mutation | DSP     | p.Q447K  | desmoplakin 59 (0.00)               | 24 (0.29)  | 0.78 |
| 12-02 | Gp3 | g.chr6:7581663C>A    | Missense Mutation | DSP     | p.A1747E | desmoplakin 104 (0.00)              | 54 (0.26)  | 0.69 |
| 12-02 | Gp3 | g.chr6:56373402A>T   | Silent            | DST     | p.T6068T | dystonin 72 (0.00)                  | 119 (0.24) | 0.63 |
| 12-02 | Gp3 | g.chr6:56417893G>A   | Missense Mutation | DST     | p.L5022F | dystonin 55 (0.00)                  | 23 (0.26)  | 0.70 |
| 12-02 | Gp3 | g.chr6:56471493G>T   | Missense Mutation | DST     | p.Q2434K | dystonin 19 (0.00)                  | 18 (0.28)  | 0.74 |
| 12-02 | Gp3 | g.chr19:57670572C>A  | Missense Mutation | DUXA    | p.Q85H   | double homeobox A 22 (0.00)         | 13 (0.92)  | 2.46 |
| 12-02 | Gp3 | g.chr1:206822096G>T  | Missense Mutation | DYRK3   | p.R518I  | dual-specificity tyrosine 28 (0.00) | 23 (0.22)  | 0.58 |
| 12-02 | Gp3 | g.chr20:18370424C>A  | Missense Mutation | DZANK1  | p.V647L  | double zinc ribbon and ε 47 (0.00)  | 46 (0.15)  | 0.41 |
| 12-02 | Gp3 | g.chr3:137783535C>A  | Missense Mutation | DZIP1L  | p.V693F  | DAZ interacting zinc fir 43 (0.00)  | 21 (0.29)  | 0.76 |
| 12-02 | Gp3 | g.chr11:19251050G>T  | Missense Mutation | E2F8    | p.S615Y  | E2F transcription factor 72 (0.01)  | 41 (0.22)  | 0.59 |
| 12-02 | Gp3 | g.chr3:73111890G>A   | Missense Mutation | EBLN2   | p.G220R  | endogenous Bornavirus- 78 (0.00)    | 14 (0.36)  | 0.95 |
| 12-02 | Gp3 | g.chr3:73111939C>A   | Missense Mutation | EBLN2   | p.A236E  | endogenous Bornavirus- 75 (0.00)    | 47 (0.15)  | 0.40 |
| 12-02 | Gp3 | g.chr1:236645864G>C  | Missense Mutation | EDARADD | p.R178T  | EDAR-associated death 18 (0.00)     | 55 (0.16)  | 0.44 |
| 12-02 | Gp3 | g.chr13:78492253G>T  | Silent            | EDNRB   | p.V242V  | endothelin receptor type 22 (0.00)  | 50 (0.16)  | 0.43 |
| 12-02 | Gp3 | g.chr2:63053353C>T   | Silent            | EHBP1   | p.A148A  | EH domain binding prot 140 (0.00)   | 21 (0.24)  | 0.63 |
| 12-02 | Gp3 | g.chr19:40030083C>A  | Missense Mutation | EID2    | p.A213S  | EP300 interacting inhibi 21 (0.00)  | 52 (0.21)  | 0.74 |
| 12-02 | Gp3 | g.chr3:184039723C>A  | Missense Mutation | EIF4G1  | p.P364T  | eukaryotic translation in 22 (0.00) | 54 (0.24)  | 0.64 |
| 12-02 | Gp3 | g.chr4:139981694G>A  | Missense Mutation | ELF2    | p.T302I  | E74-like factor 2 (ets do 64 (0.00) | 58 (0.66)  | 1.75 |
| 12-02 | Gp3 | g.chr14:24608639G>A  | Nonsense Mutation | EMC9    | p.Q50*   | ER membrane protein c 34 (0.00)     | 17 (0.35)  | 0.94 |
| 12-02 | Gp3 | g.chr19:6926575G>T   | Missense Mutation | EMR1    | p.A729S  | egf-like module containi 17 (0.00)  | 18 (0.61)  | 2.26 |
| 12-02 | Gp3 | g.chr1:29314147G>T   | Missense Mutation | EPB41   | p.L66F   | erythrocyte membrane p 36 (0.00)    | 19 (0.42)  | 1.40 |

|       |     |                     |                   |          |          |                              |            |           |      |
|-------|-----|---------------------|-------------------|----------|----------|------------------------------|------------|-----------|------|
| 12-02 | Gp3 | g.chr7:37988491G>A  | Missense Mutation | EPDR1    | p.D46N   | ependymin related 1          | 70 (0.00)  | 52 (0.15) | 0.41 |
| 12-02 | Gp3 | g.chr7:100411274C>G | Splice Site       | EPHB4    | p.G586R  | EPH receptor B4              | 37 (0.00)  | 44 (0.18) | 0.48 |
| 12-02 | Gp3 | g.chr13:43491697T>A | Nonsense Mutation | EPSTI1   | p.K241*  | epithelial stromal interact  | 105 (0.00) | 56 (0.23) | 0.62 |
| 12-02 | Gp3 | g.chr16:14021912A>T | Missense Mutation | ERCC4    | p.L204F  | excision repair cross-comple | 90 (0.00)  | 28 (0.18) | 0.48 |
| 12-02 | Gp3 | g.chr16:14021913G>T | Nonsense Mutation | ERCC4    | p.E205*  | excision repair cross-comple | 91 (0.00)  | 28 (0.18) | 0.48 |
| 12-02 | Gp3 | g.chr10:50714016C>A | Silent            | ERCC6    | p.L480L  | excision repair cross-comple | 102 (0.00) | 30 (0.17) | 0.44 |
| 12-02 | Gp3 | g.chr21:39820911C>T | Intron            | ERG      |          | v-ets avian erythroblastc    | 43 (0.00)  | 21 (0.52) | 0.46 |
| 12-02 | Gp3 | g.chr21:39907944C>A | Intron            | ERG      |          | v-ets avian erythroblastc    | 127 (0.00) | 11 (0.73) | 0.65 |
| 12-02 | Gp3 | g.chr21:39932328C>T | Intron            | ERG      |          | v-ets avian erythroblastc    | 74 (0.00)  | 77 (0.44) | 0.39 |
| 12-02 | Gp3 | g.chr21:39961676G>A | Intron            | ERG      |          | v-ets avian erythroblastc    | 81 (0.00)  | 52 (0.56) | 0.49 |
| 12-02 | Gp3 | g.chr12:56536626G>A | Missense Mutation | ESYT1    | p.E976K  | extended synaptotagmin       | 33 (0.00)  | 31 (0.23) | 0.60 |
| 12-02 | Gp3 | g.chr7:158528218G>C | Silent            | ESYT2    | p.S854S  | extended synaptotagmin       | 20 (0.00)  | 48 (0.27) | 0.72 |
| 12-02 | Gp3 | g.chr3:185783746G>C | Missense Mutation | ETV5     | p.P256A  | ets variant 5                | 18 (0.00)  | 13 (0.62) | 1.64 |
| 12-02 | Gp3 | g.chr2:72958316G>T  | Missense Mutation | EXOC6B   | p.A129D  | exocyst complex compo        | 62 (0.00)  | 28 (0.21) | 0.57 |
| 12-02 | Gp3 | g.chr8:72127948G>T  | Missense Mutation | EYA1     | p.A459D  | EYA transcriptional coa      | 40 (0.00)  | 33 (0.18) | 0.48 |
| 12-02 | Gp3 | g.chr11:61570870C>T | Missense Mutation | FADS1    | p.D405N  | fatty acid desaturase 1      | 88 (0.00)  | 50 (0.18) | 0.48 |
| 12-02 | Gp3 | g.chr1:50956312G>T  | Missense Mutation | FAF1     | p.A534E  | Fas (TNFRSF6) associa        | 55 (0.00)  | 27 (0.26) | 0.69 |
| 12-02 | Gp3 | g.chr4:38907156G>A  | Silent            | FAM114A1 | p.T150T  | family with sequence sim     | 35 (0.00)  | 22 (0.45) | 1.21 |
| 12-02 | Gp3 | g.chr17:40734785C>T | Missense Mutation | FAM134C  | p.D284N  | family with sequence sim     | 23 (0.00)  | 43 (0.30) | 1.08 |
| 12-02 | Gp3 | g.chr5:177468764G>T | Splice Site       | FAM153C  | p.M97I   | family with sequence sim     | 99 (0.01)  | 53 (0.17) | 0.45 |
| 12-02 | Gp3 | g.chr4:152499103C>T | Missense Mutation | FAM160A1 | p.P203S  | family with sequence sim     | 41 (0.00)  | 32 (0.22) | 0.58 |
| 12-02 | Gp3 | g.chr14:45475279C>G | Missense Mutation | FAM179B  | p.R905G  | family with sequence sim     | 66 (0.00)  | 15 (0.53) | 1.42 |
| 12-02 | Gp3 | g.chr10:5789182T>C  | Silent            | FAM208B  | p.S1266S | family with sequence sim     | 19 (0.00)  | 14 (0.43) | 1.14 |
| 12-02 | Gp3 | g.chr10:46245581A>G | Missense Mutation | FAM21C   | p.D257G  | family with sequence sim     | 49 (0.00)  | 14 (0.36) | 0.95 |
| 12-02 | Gp3 | g.chr6:116875168G>C | Missense Mutation | FAM26D   | p.R71T   | family with sequence sim     | 76 (0.00)  | 33 (0.36) | 0.97 |
| 12-02 | Gp3 | g.chr1:809826C>A    | lincRNA           | FAM41C   |          | family with sequence sim     | 15 (0.00)  | 27 (0.26) | 0.69 |
| 12-02 | Gp3 | g.chr6:24850926G>A  | Missense Mutation | FAM65B   | p.R233W  | family with sequence sim     | 89 (0.00)  | 80 (0.19) | 0.50 |
| 12-02 | Gp3 | g.chr6:24873108C>G  | Splice Site       | FAM65B   |          | family with sequence sim     | 26 (0.00)  | 20 (0.40) | 1.07 |
| 12-02 | Gp3 | g.chr15:89828379G>T | Missense Mutation | FANCI    | p.C584F  | Fanconi anemia, comple       | 43 (0.00)  | 39 (0.21) | 0.55 |
| 12-02 | Gp3 | g.chr15:89843558G>A | Missense Mutation | FANCI    | p.R944K  | Fanconi anemia, comple       | 62 (0.00)  | 27 (0.22) | 0.59 |
| 12-02 | Gp3 | g.chr2:207636648T>A | Missense Mutation | FASTKD2  | p.S341T  | FAST kinase domains 2        | 51 (0.00)  | 28 (0.29) | 0.76 |
| 12-02 | Gp3 | g.chr2:207636679T>A | Missense Mutation | FASTKD2  | p.V351E  | FAST kinase domains 2        | 55 (0.02)  | 58 (0.31) | 0.83 |
| 12-02 | Gp3 | g.chr20:3128413C>A  | Missense Mutation | FASTKD5  | p.W435L  | FAST kinase domains 5        | 55 (0.00)  | 28 (0.18) | 0.48 |
| 12-02 | Gp3 | g.chr4:187629074T>C | Silent            | FAT1     | p.A636A  | FAT atypical cadherin        | 181 (0.00) | 43 (0.26) | 0.68 |
| 12-02 | Gp3 | g.chr11:92086159C>T | Missense Mutation | FAT3     | p.A144V  | FAT atypical cadherin        | 371 (0.00) | 47 (0.23) | 0.62 |

|       |     |                     |                   |         |          |                                        |           |      |
|-------|-----|---------------------|-------------------|---------|----------|----------------------------------------|-----------|------|
| 12-02 | Gp3 | g.chr11:92088454G>T | Missense Mutation | FAT3    | p.G909V  | FAT atypical cadherin 387 (0.00)       | 41 (0.17) | 0.46 |
| 12-02 | Gp3 | g.chr9:37516023G>T  | Silent            | FBXO10  | p.A858A  | F-box protein 10 24 (0.00)             | 41 (0.15) | 0.39 |
| 12-02 | Gp3 | g.chr6:146125839C>A | Missense Mutation | FBXO30  | p.R568I  | F-box protein 30 55 (0.00)             | 31 (0.16) | 0.43 |
| 12-02 | Gp3 | g.chr6:146127424C>T | Missense Mutation | FBXO30  | p.V40I   | F-box protein 30 47 (0.00)             | 16 (0.31) | 0.83 |
| 12-02 | Gp3 | g.chr6:52943664G>A  | Silent            | FBXO9   | p.R125R  | F-box protein 9 30 (0.00)              | 27 (0.26) | 0.69 |
| 12-02 | Gp3 | g.chr9:123526906C>T | Silent            | FBXW2   | p.T432T  | F-box and WD repeat do 19 (0.00)       | 47 (0.43) | 1.13 |
| 12-02 | Gp3 | g.chr11:72598541C>A | Missense Mutation | FCHSD2  | p.A238S  | FCH and double SH3 do 76 (0.00)        | 58 (0.19) | 0.66 |
| 12-02 | Gp3 | g.chr4:71099779C>T  | Missense Mutation | FDCSP   | p.P45S   | follicular dendritic cell s 123 (0.00) | 66 (0.32) | 0.85 |
| 12-02 | Gp3 | g.chr1:60106969G>T  | Silent            | FGGY    | p.L413L  | FGGY carbohydrate kin 50 (0.00)        | 18 (0.28) | 0.74 |
| 12-02 | Gp3 | g.chr11:27016670C>A | Silent            | FIBIN   | p.T199T  | fin bud initiation factor l 28 (0.00)  | 60 (0.18) | 0.49 |
| 12-02 | Gp3 | g.chr3:99643091T>C  | Silent            | FILIP1L | p.L196L  | filamin A interacting pro 120 (0.01)   | 56 (0.21) | 0.57 |
| 12-02 | Gp3 | g.chr1:154960931C>A | Missense Mutation | FLAD1   | p.F144L  | flavin adenine dinucleot 16 (0.00)     | 22 (0.32) | 0.85 |
| 12-02 | Gp3 | g.chr1:152278858C>G | Missense Mutation | FLG     | p.R2835T | filaggrin 58 (0.00)                    | 41 (0.15) | 0.51 |
| 12-02 | Gp3 | g.chr1:152281880G>C | Missense Mutation | FLG     | p.H1828D | filaggrin 45 (0.00)                    | 58 (0.12) | 0.42 |
| 12-02 | Gp3 | g.chr1:152284273C>A | Missense Mutation | FLG     | p.G1030V | filaggrin 42 (0.00)                    | 52 (0.15) | 0.53 |
| 12-02 | Gp3 | g.chr1:152285412C>T | Silent            | FLG     | p.Q650Q  | filaggrin 41 (0.00)                    | 52 (0.19) | 0.67 |
| 12-02 | Gp3 | g.chr1:152329369C>G | Missense Mutation | FLG2    | p.C298S  | filaggrin family membe 57 (0.00)       | 67 (0.24) | 0.83 |
| 12-02 | Gp3 | g.chr13:28897033C>A | Silent            | FLT1    | p.L949L  | fms-related tyrosine kin 60 (0.00)     | 63 (0.24) | 0.63 |
| 12-02 | Gp3 | g.chr9:132720771G>A | Splice Site       | FNBP1   | p.S136F  | formin binding protein 138 (0.03)      | 51 (0.41) | 1.38 |
| 12-02 | Gp3 | g.chr12:2981323C>G  | Missense Mutation | FOXM1   | p.R198P  | forkhead box M1 52 (0.02)              | 38 (0.21) | 0.39 |
| 12-02 | Gp3 | g.chr4:79350252C>T  | Missense Mutation | FRAS1   | p.S1572L | Fraser extracellular mat 38 (0.00)     | 24 (0.29) | 0.78 |
| 12-02 | Gp3 | g.chr4:144618097C>A | Missense Mutation | FREM3   | p.Q1244H | FRAS1 related extracell 29 (0.00)      | 35 (0.14) | 0.38 |
| 12-02 | Gp3 | g.chr7:127239473T>A | Missense Mutation | FSCN3   | p.S387T  | fascin actin-bundling pr 19 (0.00)     | 29 (0.28) | 0.74 |
| 12-02 | Gp3 | g.chr2:186657964C>A | Missense Mutation | FSIP2   | p.S2034Y | fibrous sheath interact 79 (0.00)      | 44 (0.23) | 0.42 |
| 12-02 | Gp3 | g.chr19:49469861C>A | Missense Mutation | FTL     | p.H133N  | ferritin, light polypept 18 (0.00)     | 25 (0.20) | 0.76 |
| 12-02 | Gp3 | g.chr5:161324315G>A | Missense Mutation | GABRA1  | p.D420N  | gamma-aminobutyric ac 65 (0.00)        | 39 (0.36) | 0.96 |
| 12-02 | Gp3 | g.chr9:101606471C>T | Missense Mutation | GALNT12 | p.H480Y  | polypeptide N-acetylga 23 (0.00)       | 35 (0.23) | 0.61 |
| 12-02 | Gp3 | g.chr9:130155488C>A | Missense Mutation | GARNL3  | p.F999L  | GTPase activating Rap/l 28 (0.00)      | 35 (0.14) | 0.48 |
| 12-02 | Gp3 | g.chr21:34883690G>A | Missense Mutation | GART    | p.A728V  | phosphoribosylglycinar 109 (0.00)      | 97 (0.23) | 0.60 |
| 12-02 | Gp3 | g.chr11:22759284G>T | Missense Mutation | GAS2    | p.C148F  | growth arrest-specific 2 54 (0.00)     | 45 (0.16) | 0.41 |
| 12-02 | Gp3 | g.chr1:155207363C>A | Silent            | GBA     | p.L256L  | glucosidase, beta, acid 36 (0.00)      | 49 (0.18) | 0.49 |
| 12-02 | Gp3 | g.chr1:89524685G>A  | Missense Mutation | GBP1    | p.S157L  | guanylate binding prote 102 (0.00)     | 61 (0.16) | 0.44 |
| 12-02 | Gp3 | g.chr6:10874852A>G  | Silent            | GCM2    | p.P299P  | glial cells missing homo 98 (0.00)     | 59 (0.36) | 0.95 |
| 12-02 | Gp3 | g.chr17:57326130T>A | Missense Mutation | GDPD1   | p.D117E  | glycerophosphodiester p 55 (0.00)      | 29 (0.31) | 1.03 |
| 12-02 | Gp3 | g.chr2:17962283C>T  | Nonsense Mutation | GEN1    | p.Q602*  | GEN1 Holliday junctio 21 (0.00)        | 20 (0.30) | 0.80 |

|       |     |                      |                   |            |          |                                      |            |      |
|-------|-----|----------------------|-------------------|------------|----------|--------------------------------------|------------|------|
| 12-02 | Gp3 | g.chr3:158370014C>A  | Silent            | GFM1       | p.I273I  | G elongation factor, mit 25 (0.00)   | 27 (0.19)  | 0.49 |
| 12-02 | Gp3 | g.chr8:63930103G>C   | Missense Mutation | GGH        | p.P262A  | gamma-glutamyl hydrol 70 (0.00)      | 15 (0.33)  | 0.89 |
| 12-02 | Gp3 | g.chr2:233671277G>A  | Silent            | GIGYF2     | p.A566A  | GRB10 interacting GYF48 (0.00)       | 44 (0.27)  | 0.73 |
| 12-02 | Gp3 | g.chr7:150171491C>A  | Nonsense Mutation | GIMAP8     | p.Y358*  | GTPase, IMAP family n62 (0.00)       | 37 (0.24)  | 0.65 |
| 12-02 | Gp3 | g.chr7:99526489T>A   | Missense Mutation | GJC3       | p.E252V  | gap junction protein, gai23 (0.00)   | 28 (0.25)  | 0.67 |
| 12-02 | Gp3 | g.chr15:69548542G>T  | Missense Mutation | GLCE       | p.V69F   | glucuronic acid epimera 73 (0.00)    | 22 (0.36)  | 0.97 |
| 12-02 | Gp3 | g.chr16:74525108G>T  | Missense Mutation | GLG1       | p.Q403K  | golgi glycoprotein 1 66 (0.00)       | 10 (0.50)  | 0.79 |
| 12-02 | Gp3 | g.chr6:39053733C>A   | Missense Mutation | GLP1R      | p.H426N  | glucagon-like peptide 1 19 (0.00)    | 84 (0.21)  | 0.57 |
| 12-02 | Gp3 | g.chr9:138516483G>T  | Missense Mutation | GLT6D1     | p.H97Q   | glycosyltransferase 6 do 15 (0.00)   | 37 (0.16)  | 0.43 |
| 12-02 | Gp3 | g.chr1:231396412G>A  | Missense Mutation | GNPAT      | p.E141K  | glyceronephosphate O-a 18 (0.00)     | 25 (0.48)  | 1.28 |
| 12-02 | Gp3 | g.chr9:127650591G>T  | Missense Mutation | GOLGA1     | p.L616I  | golgin A1 26 (0.00)                  | 67 (0.19)  | 0.52 |
| 12-02 | Gp3 | g.chr15:23610236T>A  | Nonsense Mutation | GOLGA8S    | p.C611*  | golgin A8 family, memt 29 (0.00)     | 243 (0.20) | 0.69 |
| 12-02 | Gp3 | g.chr6:24456783T>A   | Missense Mutation | GPLD1      | p.H364L  | glycosylphosphatidylinc 63 (0.00)    | 39 (0.15)  | 0.41 |
| 12-02 | Gp3 | g.chrX:129519013C>T  | Missense Mutation | GPR119     | p.G137S  | G protein-coupled recep 23 (0.00)    | 15 (0.40)  | 0.67 |
| 12-02 | Gp3 | g.chr4:22390430G>T   | Missense Mutation | GPR125     | p.P955H  | G protein-coupled recep 87 (0.00)    | 43 (0.26)  | 0.68 |
| 12-02 | Gp3 | g.chr5:90073777C>A   | Missense Mutation | GPR98      | p.P4195T | G protein-coupled recep 69 (0.00)    | 26 (0.23)  | 0.62 |
| 12-02 | Gp3 | g.chr4:90170285G>A   | Missense Mutation | GPRIN3     | p.A326V  | GPRIN family member 32 (0.00)        | 21 (0.24)  | 0.63 |
| 12-02 | Gp3 | g.chr1:109461321G>T  | Silent            | GPSM2      | p.L450L  | G-protein signaling moc 45 (0.00)    | 36 (0.33)  | 0.89 |
| 12-02 | Gp3 | g.chr11:105483024C>T | Missense Mutation | GRIA4      | p.T37I   | glutamate receptor, iono 81 (0.00)   | 34 (0.15)  | 0.39 |
| 12-02 | Gp3 | g.chr16:9934877C>A   | Silent            | GRIN2A     | p.V471V  | glutamate receptor, iono 46 (0.00)   | 23 (0.30)  | 0.81 |
| 12-02 | Gp3 | g.chr10:121207737G>T | Nonsense Mutation | GRK5       | p.E457*  | G protein-coupled recep 19 (0.00)    | 128 (0.21) | 0.56 |
| 12-02 | Gp3 | g.chr10:121207763C>T | Silent            | GRK5       | p.F465F  | G protein-coupled recep 21 (0.00)    | 126 (0.20) | 0.53 |
| 12-02 | Gp3 | g.chr4:71691024C>A   | Missense Mutation | GRSF1      | p.R299L  | G-rich RNA sequence b 105 (0.01)     | 168 (0.20) | 0.54 |
| 12-02 | Gp3 | g.chr7:76982948C>G   | Missense Mutation | GSAP       | p.W450S  | gamma-secretase activat 110 (0.00)   | 17 (0.53)  | 1.41 |
| 12-02 | Gp3 | g.chr7:74114711C>T   | Silent            | GTF2I      | p.L170L  | general transcription fac 101 (0.00) | 119 (0.32) | 0.85 |
| 12-02 | Gp3 | g.chr7:74148271G>A   | Silent            | GTF2I      | p.E437E  | general transcription fac 22 (0.00)  | 22 (0.23)  | 0.61 |
| 12-02 | Gp3 | g.chr7:72657836C>G   | RNA               | GTF2IRD2P1 |          | GTF2I repeat domain cc 20 (0.00)     | 23 (0.30)  | 0.81 |
| 12-02 | Gp3 | g.chr16:27512521G>T  | Silent            | GTF3C1     | p.I684I  | general transcription fac 38 (0.00)  | 38 (0.16)  | 0.42 |
| 12-02 | Gp3 | g.chr13:51599601G>T  | RNA               | GUCY1B2    |          | guanylate cyclase 1, sol 19 (0.00)   | 14 (0.50)  | 1.33 |
| 12-02 | Gp3 | g.chr4:156723633T>A  | Missense Mutation | GUCY1B3    | p.S414T  | guanylate cyclase 1, sol 76 (0.00)   | 42 (0.64)  | 1.71 |
| 12-02 | Gp3 | g.chr6:135360761C>T  | Missense Mutation | HBS1L      | p.S127N  | HBS1-like translational 102 (0.00)   | 103 (0.24) | 0.65 |
| 12-02 | Gp3 | g.chr3:121366177G>A  | Nonsense Mutation | HCLS1      | p.R93*   | hematopoietic cell-speci 22 (0.00)   | 23 (0.22)  | 0.58 |
| 12-02 | Gp3 | g.chr1:155253884G>T  | Missense Mutation | HCN3       | p.Q276H  | hyperpolarization activa 16 (0.00)   | 26 (0.19)  | 0.51 |
| 12-02 | Gp3 | g.chr7:18631668G>A   | Intron            | HDAC9      |          | histone deacetylase 9 101 (0.00)     | 53 (0.45)  | 1.21 |
| 12-02 | Gp3 | g.chr7:18641180C>T   | Intron            | HDAC9      |          | histone deacetylase 9 83 (0.00)      | 35 (0.17)  | 0.46 |

|       |     |                     |                   |         |                                    |            |            |      |
|-------|-----|---------------------|-------------------|---------|------------------------------------|------------|------------|------|
| 12-02 | Gp3 | g.chr7:18659336C>A  | Intron            | HDAC9   | histone deacetylase 9              | 31 (0.00)  | 26 (0.77)  | 2.05 |
| 12-02 | Gp3 | g.chr7:18661878G>T  | Intron            | HDAC9   | histone deacetylase 9              | 28 (0.00)  | 37 (0.22)  | 0.58 |
| 12-02 | Gp3 | g.chr7:18668145G>A  | Intron            | HDAC9   | histone deacetylase 9              | 18 (0.00)  | 12 (0.42)  | 1.11 |
| 12-02 | Gp3 | g.chr7:18702390G>A  | Intron            | HDAC9   | histone deacetylase 9              | 59 (0.00)  | 43 (0.28)  | 0.74 |
| 12-02 | Gp3 | g.chr7:18743839A>G  | Intron            | HDAC9   | histone deacetylase 9              | 48 (0.00)  | 27 (0.52)  | 1.38 |
| 12-02 | Gp3 | g.chr7:18761272G>A  | Intron            | HDAC9   | histone deacetylase 9              | 104 (0.00) | 43 (0.44)  | 1.18 |
| 12-02 | Gp3 | g.chr7:18785009C>G  | Intron            | HDAC9   | histone deacetylase 9              | 35 (0.00)  | 76 (0.17)  | 0.46 |
| 12-02 | Gp3 | g.chr7:18796440C>A  | Intron            | HDAC9   | histone deacetylase 9              | 99 (0.00)  | 33 (0.36)  | 0.97 |
| 12-02 | Gp3 | g.chr7:18800288C>A  | Intron            | HDAC9   | histone deacetylase 9              | 68 (0.00)  | 15 (0.47)  | 1.24 |
| 12-02 | Gp3 | g.chr7:18806910T>C  | Intron            | HDAC9   | histone deacetylase 9              | 25 (0.00)  | 28 (0.25)  | 0.67 |
| 12-02 | Gp3 | g.chr7:18822104T>C  | Intron            | HDAC9   | histone deacetylase 9              | 63 (0.00)  | 20 (0.25)  | 0.67 |
| 12-02 | Gp3 | g.chr7:18826164C>T  | Intron            | HDAC9   | histone deacetylase 9              | 67 (0.00)  | 28 (0.39)  | 1.05 |
| 12-02 | Gp3 | g.chr7:18829835A>C  | Intron            | HDAC9   | histone deacetylase 9              | 191 (0.00) | 76 (0.43)  | 1.16 |
| 12-02 | Gp3 | g.chr7:18835989C>A  | Intron            | HDAC9   | histone deacetylase 9              | 163 (0.01) | 39 (0.21)  | 0.55 |
| 12-02 | Gp3 | g.chr7:18854251C>A  | Intron            | HDAC9   | histone deacetylase 9              | 72 (0.00)  | 16 (0.31)  | 0.83 |
| 12-02 | Gp3 | g.chr7:18877874T>G  | Intron            | HDAC9   | histone deacetylase 9              | 57 (0.00)  | 30 (0.20)  | 0.53 |
| 12-02 | Gp3 | g.chr7:18912078T>C  | Intron            | HDAC9   | histone deacetylase 9              | 134 (0.00) | 33 (0.15)  | 0.40 |
| 12-02 | Gp3 | g.chr7:18918493T>C  | Intron            | HDAC9   | histone deacetylase 9              | 20 (0.00)  | 14 (0.50)  | 1.33 |
| 12-02 | Gp3 | g.chr7:18935085G>T  | Intron            | HDAC9   | histone deacetylase 9              | 55 (0.00)  | 18 (0.33)  | 0.89 |
| 12-02 | Gp3 | g.chr7:18945420C>T  | Intron            | HDAC9   | histone deacetylase 9              | 21 (0.00)  | 40 (0.20)  | 0.53 |
| 12-02 | Gp3 | g.chr7:18980816C>A  | Intron            | HDAC9   | histone deacetylase 9              | 87 (0.01)  | 32 (0.25)  | 0.67 |
| 12-02 | Gp3 | g.chr7:19001488C>G  | Intron            | HDAC9   | histone deacetylase 9              | 117 (0.00) | 52 (0.19)  | 0.51 |
| 12-02 | Gp3 | g.chr1:156714066C>T | Silent            | HDGF    | p.K126K hepatoma-derived grow      | 25 (0.00)  | 164 (0.15) | 0.41 |
| 12-02 | Gp3 | g.chr2:242186232T>C | Missense Mutation | HDLBP   | p.I629V high density lipoprotein   | 33 (0.00)  | 38 (0.16)  | 0.42 |
| 12-02 | Gp3 | g.chr2:242186244C>A | Nonsense Mutation | HDLBP   | p.E625* high density lipoprotein   | 44 (0.00)  | 38 (0.24)  | 0.63 |
| 12-02 | Gp3 | g.chr2:242194556G>C | Silent            | HDLBP   | p.V366V high density lipoprotein   | 197 (0.00) | 154 (0.15) | 0.40 |
| 12-02 | Gp3 | g.chr16:50109596C>G | Missense Mutation | HEATR3  | p.S246C HEAT repeat containing     | 33 (0.00)  | 18 (0.50)  | 0.65 |
| 12-02 | Gp3 | g.chr14:73976125A>G | Silent            | HEATR4  | p.A537A HEAT repeat containing     | 66 (0.00)  | 109 (0.21) | 0.56 |
| 12-02 | Gp3 | g.chr2:37265078C>A  | Missense Mutation | HEATR5B | p.A1046S HEAT repeat containing    | 45 (0.00)  | 48 (0.15)  | 0.39 |
| 12-02 | Gp3 | g.chr2:37302644C>T  | Missense Mutation | HEATR5B | p.R194Q HEAT repeat containing     | 40 (0.00)  | 39 (0.18)  | 0.48 |
| 12-02 | Gp3 | g.chr14:31598357C>T | Missense Mutation | HECTD1  | p.R1407K HECT domain containir     | 65 (0.00)  | 62 (0.15)  | 0.39 |
| 12-02 | Gp3 | g.chr17:65103787A>T | Missense Mutation | HELZ    | p.I1580N helicase with zinc finger | 43 (0.00)  | 27 (0.41)  | 1.09 |
| 12-02 | Gp3 | g.chr15:28375413G>T | Nonsense Mutation | HERC2   | p.S4233* HECT and RLD domain       | 17 (0.00)  | 40 (0.15)  | 0.52 |
| 12-02 | Gp3 | g.chr15:28483316G>T | Missense Mutation | HERC2   | p.Q1266K HECT and RLD domain       | 185 (0.00) | 93 (0.23)  | 0.78 |
| 12-02 | Gp3 | g.chr15:20663005A>G | RNA               | HERC2P3 | hect domain and RLD 2              | 52 (0.00)  | 39 (0.18)  | 0.48 |

|       |     |                      |                   |              |          |                                                    |            |      |
|-------|-----|----------------------|-------------------|--------------|----------|----------------------------------------------------|------------|------|
| 12-02 | Gp3 | g.chr8:43002176C>G   | Silent            | HGSNAT       | p.T68T   | heparan-alpha-glucosaminidase 154 (0.00)           | 39 (0.23)  | 0.62 |
| 12-02 | Gp3 | g.chr11:33308434G>A  | Missense Mutation | HIPK3        | p.M158I  | homeodomain interactor 51 (0.00)                   | 33 (0.15)  | 0.40 |
| 12-02 | Gp3 | g.chr6:26234986G>A   | Missense Mutation | HIST1H1D     | p.S59F   | histone cluster 1, H1d 29 (0.00)                   | 26 (0.19)  | 0.51 |
| 12-02 | Gp3 | g.chr6:26235014C>T   | Missense Mutation | HIST1H1D     | p.A50T   | histone cluster 1, H1d 28 (0.00)                   | 35 (0.26)  | 0.69 |
| 12-02 | Gp3 | g.chr6:143092886T>C  | Missense Mutation | HIVEP2       | p.Q997R  | human immunodeficiency virus 23 (0.00)             | 45 (0.18)  | 0.47 |
| 12-02 | Gp3 | g.chr5:176317669G>T  | Silent            | HK3          | p.V199V  | hexokinase 3 (white cell) 44 (0.00)                | 76 (0.20)  | 0.53 |
| 12-02 | Gp3 | g.chr5:149410360C>G  | Silent            | HMGXB3       | p.P597P  | HMG box domain containing 54 (0.00)                | 37 (0.16)  | 0.43 |
| 12-02 | Gp3 | g.chr5:179045005C>A  | Missense Mutation | HNRNPH1      | p.D258Y  | heterogeneous nuclear ribonucleoprotein 111 (0.00) | 49 (0.16)  | 0.44 |
| 12-02 | Gp3 | g.chr9:86586607C>G   | Missense Mutation | HNRNPK       | p.G330R  | heterogeneous nuclear ribonucleoprotein 195 (0.00) | 48 (0.15)  | 0.39 |
| 12-02 | Gp3 | g.chr1:245009916C>A  | RNA               | HNRNPU-AS1   |          | HNRNPU antisense RNA 29 (0.00)                     | 45 (0.16)  | 0.41 |
| 12-02 | Gp3 | g.chr19:41807520C>A  | Missense Mutation | HNRNPUL1     | p.P533H  | heterogeneous nuclear ribonucleoprotein 56 (0.00)  | 66 (0.14)  | 0.48 |
| 12-02 | Gp3 | g.chr8:42841907C>G   | Missense Mutation | HOOK3        | p.L501V  | hook microtubule-tether 56 (0.00)                  | 22 (0.32)  | 0.85 |
| 12-02 | Gp3 | g.chr10:100904139C>A | Missense Mutation | HPSE2        | p.V156F  | heparanase 2 (inactive) 81 (0.00)                  | 23 (0.22)  | 0.58 |
| 12-02 | Gp3 | g.chr11:63327587C>G  | Missense Mutation | HRASLS2      | p.D30H   | HRAS-like suppressor 223 (0.00)                    | 42 (0.17)  | 0.44 |
| 12-02 | Gp3 | g.chr7:136516907G>A  | RNA               | hsa-mir-490  |          | 16 (0.00)                                          | 15 (0.60)  | 1.60 |
| 12-02 | Gp3 | g.chr14:102552133G>A | Missense Mutation | HSP90AA1     | p.S164F  | heat shock protein 90kDa 24 (0.00)                 | 45 (0.20)  | 0.53 |
| 12-02 | Gp3 | g.chr6:44219765G>C   | Missense Mutation | HSP90AB1     | p.A498P  | heat shock protein 90kDa 55 (0.00)                 | 42 (0.14)  | 0.38 |
| 12-02 | Gp3 | g.chr11:113856770C>A | Missense Mutation | HTR3A        | p.P193Q  | 5-hydroxytryptamine (serotonin) receptor 92 (0.00) | 65 (0.23)  | 0.62 |
| 12-02 | Gp3 | g.chr4:3180151T>A    | Missense Mutation | HTT          | p.S1530R | huntingtin 68 (0.00)                               | 43 (0.26)  | 0.68 |
| 12-02 | Gp3 | g.chr4:3180152G>A    | Missense Mutation | HTT          | p.G1531R | huntingtin 68 (0.00)                               | 43 (0.26)  | 0.68 |
| 12-02 | Gp3 | g.chr10:91162675G>A  | Missense Mutation | IFIT1        | p.D215N  | interferon-induced protein 132 (0.00)              | 113 (0.55) | 1.46 |
| 12-02 | Gp3 | g.chr10:91143487A>G  | Silent            | IFIT1B       | p.P139P  | interferon-induced protein 42 (0.00)               | 30 (0.17)  | 0.44 |
| 12-02 | Gp3 | g.chr10:91144375G>A  | Silent            | IFIT1B       | p.R435R  | interferon-induced protein 34 (0.00)               | 33 (0.18)  | 0.48 |
| 12-02 | Gp3 | g.chr2:27684239G>C   | Missense Mutation | IFT172       | p.A780G  | intraflagellar transport 120 (0.00)                | 20 (0.35)  | 0.93 |
| 12-02 | Gp3 | g.chr6:160517540C>G  | Missense Mutation | IGF2R        | p.S2242C | insulin-like growth factor 110 (0.00)              | 56 (0.21)  | 0.57 |
| 12-02 | Gp3 | g.chr15:20169940G>A  | RNA               | IGHV1OR15-9  |          | immunoglobulin heavy chain 50 (0.00)               | 18 (0.61)  | 1.63 |
| 12-02 | Gp3 | g.chr21:10862961G>T  | RNA               | IGHV1OR21-1  |          | immunoglobulin heavy chain 31 (0.00)               | 64 (0.28)  | 0.75 |
| 12-02 | Gp3 | g.chr16:33629752G>A  | RNA               | IGHV3OR16-13 |          | immunoglobulin heavy chain 82 (0.00)               | 68 (0.13)  | 0.46 |
| 12-02 | Gp3 | g.chr2:89442617A>T   | RNA               | IGKV3-20     |          | immunoglobulin kappa chain 35 (0.00)               | 44 (0.18)  | 0.48 |
| 12-02 | Gp3 | g.chr2:90211931G>T   | RNA               | IGKV3D-11    |          | immunoglobulin kappa chain 32 (0.00)               | 31 (0.16)  | 0.43 |
| 12-02 | Gp3 | g.chr2:90077921C>A   | RNA               | IGKV3D-20    |          | immunoglobulin kappa chain 57 (0.00)               | 40 (0.40)  | 1.07 |
| 12-02 | Gp3 | g.chr3:151171507C>T  | Missense Mutation | IGSF10       | p.G127D  | immunoglobulin superfamily 40 (0.00)               | 41 (0.22)  | 0.59 |
| 12-02 | Gp3 | g.chr5:140038682G>T  | Missense Mutation | IK           | p.R370L  | IK cytokine, down-regulated 38 (0.00)              | 37 (0.16)  | 0.43 |
| 12-02 | Gp3 | g.chr12:99020266C>T  | Silent            | IKBIP        | p.E192E  | IKBKB interacting protein 22 (0.00)                | 14 (0.71)  | 1.13 |
| 12-02 | Gp3 | g.chr12:99020316C>T  | Missense Mutation | IKBIP        | p.E176K  | IKBKB interacting protein 35 (0.00)                | 26 (0.65)  | 1.04 |

|       |     |                      |                   |        |         |                                     |           |      |
|-------|-----|----------------------|-------------------|--------|---------|-------------------------------------|-----------|------|
| 12-02 | Gp3 | g.chr8:42183529G>T   | Missense Mutation | IKBKB  | p.M676I | inhibitor of kappa light j36 (0.00) | 28 (0.25) | 0.67 |
| 12-02 | Gp3 | g.chr7:50455105G>A   | Missense Mutation | IKZF1  | p.E218K | IKAROS family zinc fir28 (0.00)     | 39 (0.44) | 1.16 |
| 12-02 | Gp3 | g.chr10:124754007C>T | Silent            | IKZF5  | p.Q183Q | IKAROS family zinc fir53 (0.00)     | 47 (0.17) | 0.45 |
| 12-02 | Gp3 | g.chr3:53899134C>A   | Missense Mutation | IL17RB | p.S436R | interleukin 17 receptor I28 (0.00)  | 17 (0.29) | 0.78 |
| 12-02 | Gp3 | g.chr2:102849562C>A  | Silent            | IL1RL2 | p.G425G | interleukin 1 receptor-lil18 (0.00) | 26 (0.62) | 1.64 |
| 12-02 | Gp3 | g.chr7:22769184C>A   | Missense Mutation | IL6    | p.L126I | interleukin 6 47 (0.00)             | 30 (0.30) | 0.80 |
| 12-02 | Gp3 | g.chr3:101038608C>T  | Missense Mutation | IMPG2  | p.E52K  | interphotoreceptor matri60 (0.00)   | 27 (0.33) | 0.89 |
| 12-02 | Gp3 | g.chr2:242650841C>T  | Missense Mutation | ING5   | p.A109V | inhibitor of growth fami36 (0.00)   | 25 (0.24) | 0.64 |
| 12-02 | Gp3 | g.chr2:206911279G>A  | Missense Mutation | INO80D | p.P341L | INO80 complex subunit28 (0.00)      | 30 (0.17) | 0.44 |
| 12-02 | Gp3 | g.chr4:142955280G>A  | Intron            | INPP4B |         | inositol polyphosphate-419 (0.00)   | 51 (0.25) | 0.68 |
| 12-02 | Gp3 | g.chr4:142977728G>C  | Intron            | INPP4B |         | inositol polyphosphate-499 (0.00)   | 52 (0.19) | 0.51 |
| 12-02 | Gp3 | g.chr4:142986525A>G  | Intron            | INPP4B |         | inositol polyphosphate-462 (0.00)   | 67 (0.18) | 0.48 |
| 12-02 | Gp3 | g.chr4:143010160C>G  | Intron            | INPP4B |         | inositol polyphosphate-452 (0.00)   | 20 (0.25) | 0.67 |
| 12-02 | Gp3 | g.chr4:143069039C>T  | Intron            | INPP4B |         | inositol polyphosphate-4233 (0.00)  | 99 (0.16) | 0.43 |
| 12-02 | Gp3 | g.chr4:143072551C>T  | Intron            | INPP4B |         | inositol polyphosphate-467 (0.00)   | 29 (0.21) | 0.55 |
| 12-02 | Gp3 | g.chr4:143073189C>A  | Intron            | INPP4B |         | inositol polyphosphate-438 (0.00)   | 30 (0.23) | 0.62 |
| 12-02 | Gp3 | g.chr4:143086198C>G  | Intron            | INPP4B |         | inositol polyphosphate-436 (0.00)   | 30 (0.17) | 0.44 |
| 12-02 | Gp3 | g.chr4:143118521C>A  | Intron            | INPP4B |         | inositol polyphosphate-456 (0.00)   | 32 (0.16) | 0.42 |
| 12-02 | Gp3 | g.chr4:143124042G>A  | Intron            | INPP4B |         | inositol polyphosphate-467 (0.00)   | 28 (0.36) | 0.95 |
| 12-02 | Gp3 | g.chr4:143134312G>T  | Intron            | INPP4B |         | inositol polyphosphate-4105 (0.00)  | 77 (0.14) | 0.38 |
| 12-02 | Gp3 | g.chr4:143136507T>A  | Intron            | INPP4B |         | inositol polyphosphate-455 (0.00)   | 13 (0.62) | 1.64 |
| 12-02 | Gp3 | g.chr4:143147505C>A  | Intron            | INPP4B |         | inositol polyphosphate-481 (0.00)   | 44 (0.36) | 0.97 |
| 12-02 | Gp3 | g.chr4:143150913T>A  | Intron            | INPP4B |         | inositol polyphosphate-484 (0.00)   | 29 (0.28) | 0.74 |
| 12-02 | Gp3 | g.chr4:143174336C>T  | Intron            | INPP4B |         | inositol polyphosphate-417 (0.00)   | 28 (0.29) | 0.76 |
| 12-02 | Gp3 | g.chr4:143181650T>C  | Missense Mutation | INPP4B | p.N228S | inositol polyphosphate-441 (0.00)   | 23 (0.30) | 0.81 |
| 12-02 | Gp3 | g.chr4:143188696T>A  | Intron            | INPP4B |         | inositol polyphosphate-481 (0.00)   | 26 (0.58) | 1.54 |
| 12-02 | Gp3 | g.chr4:143202378G>A  | Intron            | INPP4B |         | inositol polyphosphate-418 (0.00)   | 39 (0.69) | 1.85 |
| 12-02 | Gp3 | g.chr4:143206475C>A  | Intron            | INPP4B |         | inositol polyphosphate-433 (0.00)   | 18 (0.28) | 0.74 |
| 12-02 | Gp3 | g.chr4:143230129C>A  | Intron            | INPP4B |         | inositol polyphosphate-437 (0.00)   | 13 (0.46) | 1.23 |
| 12-02 | Gp3 | g.chr4:143243930G>T  | Intron            | INPP4B |         | inositol polyphosphate-436 (0.00)   | 29 (0.17) | 0.46 |
| 12-02 | Gp3 | g.chr4:143244144A>T  | Intron            | INPP4B |         | inositol polyphosphate-452 (0.00)   | 40 (0.23) | 0.60 |
| 12-02 | Gp3 | g.chr4:143252462C>A  | Intron            | INPP4B |         | inositol polyphosphate-458 (0.00)   | 67 (0.15) | 0.40 |
| 12-02 | Gp3 | g.chr4:143282307C>A  | Intron            | INPP4B |         | inositol polyphosphate-4245 (0.00)  | 57 (0.21) | 0.56 |
| 12-02 | Gp3 | g.chr4:143322192C>T  | Intron            | INPP4B |         | inositol polyphosphate-464 (0.00)   | 20 (0.50) | 1.33 |
| 12-02 | Gp3 | g.chr4:143335952G>A  | Intron            | INPP4B |         | inositol polyphosphate-464 (0.00)   | 26 (0.31) | 0.82 |



|       |     |                      |                   |          |          |                                            |            |           |      |
|-------|-----|----------------------|-------------------|----------|----------|--------------------------------------------|------------|-----------|------|
| 12-02 | Gp3 | g.chr4:143344784G>C  | Intron            | INPP4B   |          | inositol polyphosphate- $\zeta$ 92 (0.00)  | 41 (0.29)  | 0.78      |      |
| 12-02 | Gp3 | g.chr4:143415148C>A  | Intron            | INPP4B   |          | inositol polyphosphate- $\zeta$ 91 (0.00)  | 29 (0.21)  | 0.55      |      |
| 12-02 | Gp3 | g.chr4:143438863A>T  | Intron            | INPP4B   |          | inositol polyphosphate- $\zeta$ 83 (0.01)  | 34 (0.18)  | 0.47      |      |
| 12-02 | Gp3 | g.chr4:143492397C>A  | Intron            | INPP4B   |          | inositol polyphosphate- $\zeta$ 81 (0.00)  | 26 (0.38)  | 1.03      |      |
| 12-02 | Gp3 | g.chr4:143506954A>T  | Intron            | INPP4B   |          | inositol polyphosphate- $\zeta$ 33 (0.00)  | 17 (0.29)  | 0.78      |      |
| 12-02 | Gp3 | g.chr4:143552050C>T  | Intron            | INPP4B   |          | inositol polyphosphate- $\zeta$ 46 (0.00)  | 18 (0.56)  | 1.48      |      |
| 12-02 | Gp3 | g.chr4:143585215T>A  | Intron            | INPP4B   |          | inositol polyphosphate- $\zeta$ 26 (0.00)  | 33 (0.24)  | 0.65      |      |
| 12-02 | Gp3 | g.chr4:143594867C>G  | Intron            | INPP4B   |          | inositol polyphosphate- $\zeta$ 143 (0.00) | 44 (0.25)  | 0.67      |      |
| 12-02 | Gp3 | g.chr4:143601919T>C  | Intron            | INPP4B   |          | inositol polyphosphate- $\zeta$ 149 (0.00) | 13 (0.38)  | 1.03      |      |
| 12-02 | Gp3 | g.chr4:143618450A>G  | Intron            | INPP4B   |          | inositol polyphosphate- $\zeta$ 107 (0.00) | 77 (0.14)  | 0.38      |      |
| 12-02 | Gp3 | g.chr4:143627491T>G  | Intron            | INPP4B   |          | inositol polyphosphate- $\zeta$ 57 (0.00)  | 24 (0.29)  | 0.78      |      |
| 12-02 | Gp3 | g.chr4:143635671G>T  | Intron            | INPP4B   |          | inositol polyphosphate- $\zeta$ 108 (0.00) | 34 (0.62)  | 1.65      |      |
| 12-02 | Gp3 | g.chr4:143656117G>A  | Intron            | INPP4B   |          | inositol polyphosphate- $\zeta$ 31 (0.00)  | 18 (0.39)  | 1.04      |      |
| 12-02 | Gp3 | g.chr4:143662946G>A  | Intron            | INPP4B   |          | inositol polyphosphate- $\zeta$ 54 (0.00)  | 58 (0.22)  | 0.60      |      |
| 12-02 | Gp3 | g.chr4:143662978G>A  | Intron            | INPP4B   |          | inositol polyphosphate- $\zeta$ 79 (0.00)  | 52 (0.21)  | 0.56      |      |
| 12-02 | Gp3 | g.chr4:143664319G>C  | Intron            | INPP4B   |          | inositol polyphosphate- $\zeta$ 59 (0.00)  | 30 (0.30)  | 0.80      |      |
| 12-02 | Gp3 | g.chr4:143693345C>G  | Intron            | INPP4B   |          | inositol polyphosphate- $\zeta$ 39 (0.00)  | 23 (0.26)  | 0.70      |      |
| 12-02 | Gp3 | g.chr4:143702365C>A  | Intron            | INPP4B   |          | inositol polyphosphate- $\zeta$ 28 (0.00)  | 95 (0.60)  | 1.60      |      |
| 12-02 | Gp3 | g.chr4:143757307C>T  | Intron            | INPP4B   |          | inositol polyphosphate- $\zeta$ 32 (0.00)  | 27 (0.22)  | 0.59      |      |
| 12-02 | Gp3 | g.chr4:143762563C>T  | Intron            | INPP4B   |          | inositol polyphosphate- $\zeta$ 84 (0.00)  | 42 (0.31)  | 0.83      |      |
| 12-02 | Gp3 | g.chr4:143765828C>T  | Intron            | INPP4B   |          | inositol polyphosphate- $\zeta$ 114 (0.00) | 60 (0.43)  | 1.16      |      |
| 12-02 | Gp3 | g.chr10:134463943G>A | Silent            | INPP5A   | p.A80A   | inositol polyphosphate- $\zeta$ 17 (0.00)  | 38 (0.34)  | 0.91      |      |
| 12-02 | Gp3 | g.chr9:103035223C>T  | Missense Mutation | INVS     | p.S550F  | inversin                                   | 72 (0.00)  | 18 (0.33) | 0.89 |
| 12-02 | Gp3 | g.chr11:9450613G>A   | Silent            | IPO7     | p.K487K  | importin 7                                 | 25 (0.00)  | 27 (0.22) | 0.59 |
| 12-02 | Gp3 | g.chr15:67713895C>A  | Missense Mutation | IQCH     | p.P829T  | IQ motif containing H                      | 30 (0.00)  | 37 (0.27) | 0.72 |
| 12-02 | Gp3 | g.chr5:131822533C>A  | Missense Mutation | IRF1     | p.R123I  | interferon regulatory fac 15               | 30 (0.00)  | 30 (0.17) | 0.44 |
| 12-02 | Gp3 | g.chr16:31284817G>A  | Missense Mutation | ITGAM    | p.G279E  | integrin, alpha M (comp 54                 | 57 (0.00)  | 57 (0.18) | 0.61 |
| 12-02 | Gp3 | g.chr3:4821260C>T    | Silent            | ITPR1    | p.A2091A | inositol 1,4,5-trisphosph                  | 33 (0.00)  | 35 (0.20) | 0.53 |
| 12-02 | Gp3 | g.chr3:124390715C>T  | Silent            | KALRN    | p.H606H  | kalirin, RhoGEF kinase                     | 42 (0.00)  | 45 (0.24) | 0.65 |
| 12-02 | Gp3 | g.chr10:76790380C>A  | Nonsense Mutation | KAT6B    | p.S1933* | K(lysine) acetyltransfer                   | 33 (0.00)  | 40 (0.23) | 0.60 |
| 12-02 | Gp3 | g.chr12:5021491G>T   | Missense Mutation | KCNA1    | p.G316V  | potassium voltage-gated                    | 23 (0.00)  | 39 (0.23) | 0.43 |
| 12-02 | Gp3 | g.chr3:156249257C>G  | Missense Mutation | KCNAB1   | p.Q363E  | potassium voltage-gated                    | 125 (0.00) | 77 (0.18) | 0.48 |
| 12-02 | Gp3 | g.chr1:23406133C>A   | Missense Mutation | KDM1A    | p.L715I  | lysine (K)-specific dem                    | 21 (0.00)  | 29 (0.17) | 0.46 |
| 12-02 | Gp3 | g.chr17:26943699C>G  | Missense Mutation | KIAA0100 | p.G2032R | KIAA0100                                   | 64 (0.00)  | 27 (0.19) | 0.49 |
| 12-02 | Gp3 | g.chr8:126061330C>A  | Missense Mutation | KIAA0196 | p.G766V  | KIAA0196                                   | 42 (0.00)  | 30 (0.20) | 0.53 |

|       |     |                      |                   |          |          |                           |            |           |      |
|-------|-----|----------------------|-------------------|----------|----------|---------------------------|------------|-----------|------|
| 12-02 | Gp3 | g.chr14:70175797C>G  | Missense Mutation | KIAA0247 | p.L288V  | KIAA0247                  | 38 (0.00)  | 49 (0.18) | 0.49 |
| 12-02 | Gp3 | g.chr6:24596620G>T   | Silent            | KIAA0319 | p.G94G   | KIAA0319                  | 16 (0.00)  | 26 (0.23) | 0.62 |
| 12-02 | Gp3 | g.chr16:27720099G>T  | Missense Mutation | KIAA0556 | p.G488V  | KIAA0556                  | 30 (0.00)  | 19 (0.26) | 0.70 |
| 12-02 | Gp3 | g.chr5:93489804G>T   | Missense Mutation | KIAA0825 | p.L1246I | KIAA0825                  | 16 (0.00)  | 25 (0.24) | 0.64 |
| 12-02 | Gp3 | g.chr7:36366393G>T   | Missense Mutation | KIAA0895 | p.D410E  | KIAA0895                  | 87 (0.00)  | 30 (0.27) | 0.71 |
| 12-02 | Gp3 | g.chr7:36366525A>T   | Silent            | KIAA0895 | p.V366V  | KIAA0895                  | 73 (0.00)  | 31 (0.39) | 1.03 |
| 12-02 | Gp3 | g.chrX:118221298G>C  | Missense Mutation | KIAA1210 | p.Q1299E | KIAA1210                  | 103 (0.00) | 42 (0.52) | 0.87 |
| 12-02 | Gp3 | g.chr12:32137835C>A  | Missense Mutation | KIAA1551 | p.Q1316K | KIAA1551                  | 39 (0.00)  | 19 (0.58) | 1.54 |
| 12-02 | Gp3 | g.chr2:61324885G>T   | Silent            | KIAA1841 | p.V421V  | KIAA1841                  | 33 (0.00)  | 20 (0.25) | 0.67 |
| 12-02 | Gp3 | g.chr9:115381001G>C  | Missense Mutation | KIAA1958 | p.K674N  | KIAA1958                  | 21 (0.00)  | 15 (0.33) | 0.89 |
| 12-02 | Gp3 | g.chr6:17837186C>A   | Nonsense Mutation | KIF13A   | p.E360*  | kinesin family member     | 66 (0.00)  | 53 (0.15) | 0.40 |
| 12-02 | Gp3 | g.chr3:44856518C>A   | Missense Mutation | KIF15    | p.N833K  | kinesin family member     | 45 (0.02)  | 36 (0.19) | 0.52 |
| 12-02 | Gp3 | g.chr11:28058069G>T  | Missense Mutation | KIF18A   | p.S697R  | kinesin family member     | 28 (0.00)  | 18 (0.28) | 0.74 |
| 12-02 | Gp3 | g.chr1:10425199G>A   | Missense Mutation | KIF1B    | p.A1470T | kinesin family member     | 26 (0.00)  | 17 (0.35) | 0.94 |
| 12-02 | Gp3 | g.chr9:34255883G>C   | Missense Mutation | KIF24    | p.P1241R | kinesin family member     | 58 (0.00)  | 45 (0.16) | 0.41 |
| 12-02 | Gp3 | g.chr5:61659107G>T   | Nonsense Mutation | KIF2A    | p.E388*  | kinesin heavy chain mer   | 110 (0.00) | 69 (0.16) | 0.43 |
| 12-02 | Gp3 | g.chr5:154393709C>A  | Nonsense Mutation | KIF4B    | p.S97*   | kinesin family member     | 46 (0.00)  | 76 (0.16) | 0.42 |
| 12-02 | Gp3 | g.chr5:154393725C>G  | Nonsense Mutation | KIF4B    | p.Y102*  | kinesin family member     | 56 (0.00)  | 71 (0.20) | 0.53 |
| 12-02 | Gp3 | g.chr13:73636580G>T  | Missense Mutation | KLF5     | p.M281I  | Kruppel-like factor 5 (in | 59 (0.00)  | 12 (0.50) | 1.33 |
| 12-02 | Gp3 | g.chr1:173702928C>A  | Missense Mutation | KLHL20   | p.P34T   | kelch-like family memb    | 70 (0.00)  | 35 (0.14) | 0.38 |
| 12-02 | Gp3 | g.chr14:45398260G>A  | Missense Mutation | KLHL28   | p.R577C  | kelch-like family memb    | 64 (0.00)  | 33 (0.27) | 0.73 |
| 12-02 | Gp3 | g.chr14:45398264G>A  | Silent            | KLHL28   | p.Y575Y  | kelch-like family memb    | 64 (0.00)  | 34 (0.26) | 0.71 |
| 12-02 | Gp3 | g.chr11:118343170G>T | Missense Mutation | KMT2A    | p.E432D  | lysine (K)-specific meth  | 26 (0.00)  | 12 (0.58) | 1.56 |
| 12-02 | Gp3 | g.chr12:123042036G>C | Missense Mutation | KNTC1    | p.E423Q  | kinetochore associated    | 164 (0.00) | 19 (0.32) | 0.50 |
| 12-02 | Gp3 | g.chr17:39022897G>T  | Missense Mutation | KRT12    | p.P181Q  | keratin 12                | 79 (0.00)  | 82 (0.24) | 0.87 |
| 12-02 | Gp3 | g.chr17:39114901A>T  | Silent            | KRT39    | p.S476S  | keratin 39                | 88 (0.00)  | 74 (0.14) | 0.48 |
| 12-02 | Gp3 | g.chr17:39137266T>C  | Silent            | KRT40    | p.E275E  | keratin 40                | 51 (0.00)  | 43 (0.12) | 0.42 |
| 12-02 | Gp3 | g.chr17:39137297C>T  | Missense Mutation | KRT40    | p.C265Y  | keratin 40                | 54 (0.00)  | 46 (0.20) | 0.70 |
| 12-02 | Gp3 | g.chr17:39388852T>C  | Silent            | KRTAP9-3 | p.C33C   | keratin associated protei | 22 (0.00)  | 49 (0.27) | 0.95 |
| 12-02 | Gp3 | g.chr6:130415446G>T  | Missense Mutation | L3MBTL3  | p.G557V  | l(3)mbt-like 3 (Drosoph   | 21 (0.00)  | 16 (0.50) | 1.33 |
| 12-02 | Gp3 | g.chr18:21487836G>T  | Missense Mutation | LAMA3    | p.D2318Y | laminin, alpha 3          | 34 (0.00)  | 32 (0.41) | 1.08 |
| 12-02 | Gp3 | g.chr7:107746371T>A  | Missense Mutation | LAMB4    | p.Y254F  | laminin, beta 4           | 35 (0.00)  | 45 (0.36) | 0.95 |
| 12-02 | Gp3 | g.chr1:183212360G>T  | Missense Mutation | LAMC2    | p.S1136I | laminin, gamma 2          | 51 (0.00)  | 25 (0.64) | 1.71 |
| 12-02 | Gp3 | g.chr1:183212452C>T  | Silent            | LAMC2    | p.L1167L | laminin, gamma 2          | 33 (0.00)  | 30 (0.80) | 2.13 |
| 12-02 | Gp3 | g.chr1:236706082C>G  | Missense Mutation | LGALS8   | p.Q182E  | lectin, galactoside-bindi | 34 (0.00)  | 57 (0.26) | 0.70 |

|       |     |                      |                   |            |          |                                     |            |      |
|-------|-----|----------------------|-------------------|------------|----------|-------------------------------------|------------|------|
| 12-02 | Gp3 | g.chr2:48915070C>A   | Silent            | LHCGR      | p.L622L  | luteinizing hormone/chc 96 (0.00)   | 25 (0.24)  | 0.64 |
| 12-02 | Gp3 | g.chr11:60388643C>T  | lincRNA           | LINC00301  |          | long intergenic non-prot 39 (0.00)  | 45 (0.16)  | 0.41 |
| 12-02 | Gp3 | g.chr3:52097311G>A   | Missense Mutation | LINC00696  | p.A86V   | long intergenic non-prot 52 (0.00)  | 57 (0.32)  | 0.84 |
| 12-02 | Gp3 | g.chr14:46701262C>A  | lincRNA           | LINC00871  |          | long intergenic non-prot 18 (0.00)  | 22 (0.23)  | 0.61 |
| 12-02 | Gp3 | g.chr10:131906519A>G | lincRNA           | LINC00959  |          | long intergenic non-prot 18 (0.00)  | 24 (0.50)  | 1.33 |
| 12-02 | Gp3 | g.chr6:2990689C>A    | lincRNA           | LINC01011  |          | long intergenic non-prot 91 (0.00)  | 41 (0.27)  | 0.72 |
| 12-02 | Gp3 | g.chr1:145487402T>A  | Missense Mutation | LIX1L      | p.S131T  | Lix1 homolog (chicken) 31 (0.00)    | 43 (0.16)  | 0.43 |
| 12-02 | Gp3 | g.chr1:145487403C>A  | Missense Mutation | LIX1L      | p.S131Y  | Lix1 homolog (chicken) 31 (0.00)    | 42 (0.17)  | 0.44 |
| 12-02 | Gp3 | g.chr7:156556396C>A  | Missense Mutation | LMBR1      | p.D173Y  | limb development mem1 26 (0.00)     | 22 (0.27)  | 0.73 |
| 12-02 | Gp3 | g.chr13:28136712T>A  | Missense Mutation | LN2        | p.K354N  | ligand of numb-protein 35 (0.00)    | 13 (0.38)  | 1.03 |
| 12-02 | Gp3 | g.chr2:100915391A>G  | Silent            | LONRF2     | p.T461T  | LON peptidase N-termi 127 (0.00)    | 22 (0.23)  | 0.61 |
| 12-02 | Gp3 | g.chr6:161015111G>A  | Missense Mutation | LPA        | p.H1170Y | lipoprotein, Lp(a) 43 (0.00)        | 16 (0.44)  | 1.17 |
| 12-02 | Gp3 | g.chr6:160906978C>T  | RNA               | LPAL2      |          | lipoprotein, Lp(a)-like 2 66 (0.00) | 31 (0.29)  | 0.77 |
| 12-02 | Gp3 | g.chr4:62758418A>T   | Missense Mutation | LPN3       | p.S441C  | latrophilin 3 63 (0.00)             | 130 (0.15) | 0.39 |
| 12-02 | Gp3 | g.chr12:12274277G>A  | Missense Mutation | LRP6       | p.A1497V | low density lipoprotein 158 (0.00)  | 15 (0.40)  | 0.74 |
| 12-02 | Gp3 | g.chr17:30358430C>G  | Missense Mutation | LRRC37B    | p.S561R  | leucine rich repeat conta 37 (0.00) | 23 (0.30)  | 0.81 |
| 12-02 | Gp3 | g.chr1:90178399C>T   | Silent            | LRRC8C     | p.N90N   | leucine rich repeat conta 23 (0.00) | 21 (0.33)  | 0.89 |
| 12-02 | Gp3 | g.chr19:34706522G>A  | Missense Mutation | LSM14A     | p.R205K  | LSM14A, SCD6 homolo 19 (0.00)       | 47 (0.19)  | 0.51 |
| 12-02 | Gp3 | g.chr1:23419518T>C   | Missense Mutation | LUZP1      | p.N413D  | leucine zipper protein 1 56 (0.00)  | 14 (0.36)  | 0.95 |
| 12-02 | Gp3 | g.chr2:160714872C>T  | Splice Site       | LY75-CD302 |          | LY75-CD302 readthrou 68 (0.00)      | 34 (0.32)  | 0.50 |
| 12-02 | Gp3 | g.chr8:74903745G>T   | Missense Mutation | LY96       | p.W23L   | lymphocyte antigen 96 49 (0.00)     | 36 (0.28)  | 0.74 |
| 12-02 | Gp3 | g.chr8:74903746G>T   | Missense Mutation | LY96       | p.W23C   | lymphocyte antigen 96 49 (0.00)     | 36 (0.28)  | 0.74 |
| 12-02 | Gp3 | g.chr1:39888456C>G   | Missense Mutation | MACF1      | p.Q5350E | microtubule-actin crossl 51 (0.00)  | 10 (0.80)  | 2.13 |
| 12-02 | Gp3 | g.chrX:140996422G>A  | Missense Mutation | MAGEC1     | p.E1078K | melanoma antigen famil 40 (0.00)    | 82 (0.45)  | 0.75 |
| 12-02 | Gp3 | g.chr7:77654110A>G   | Intron            | MAGI2      |          | membrane associated gu 40 (0.00)    | 55 (0.38)  | 1.02 |
| 12-02 | Gp3 | g.chr7:77654148T>C   | Intron            | MAGI2      |          | membrane associated gu 46 (0.00)    | 59 (0.49)  | 1.31 |
| 12-02 | Gp3 | g.chr7:77663725C>A   | Intron            | MAGI2      |          | membrane associated gu 51 (0.00)    | 42 (0.31)  | 0.83 |
| 12-02 | Gp3 | g.chr7:77667225C>A   | Intron            | MAGI2      |          | membrane associated gu 22 (0.00)    | 23 (0.61)  | 1.62 |
| 12-02 | Gp3 | g.chr7:77677204C>T   | Intron            | MAGI2      |          | membrane associated gu 41 (0.00)    | 44 (0.18)  | 0.48 |
| 12-02 | Gp3 | g.chr7:77686838G>T   | Intron            | MAGI2      |          | membrane associated gu 45 (0.00)    | 43 (0.21)  | 0.56 |
| 12-02 | Gp3 | g.chr7:77686861G>T   | Intron            | MAGI2      |          | membrane associated gu 48 (0.00)    | 53 (0.19)  | 0.50 |
| 12-02 | Gp3 | g.chr7:77694860G>T   | Intron            | MAGI2      |          | membrane associated gu 42 (0.00)    | 31 (0.26)  | 0.69 |
| 12-02 | Gp3 | g.chr7:77694878A>T   | Intron            | MAGI2      |          | membrane associated gu 60 (0.00)    | 42 (0.14)  | 0.38 |
| 12-02 | Gp3 | g.chr7:77754547G>A   | Intron            | MAGI2      |          | membrane associated gu 40 (0.00)    | 63 (0.84)  | 2.24 |
| 12-02 | Gp3 | g.chr7:77755126T>C   | Missense Mutation | MAGI2      | p.E1151G | membrane associated gu 41 (0.00)    | 23 (0.30)  | 0.81 |

|       |     |                    |        |       |                     |               |           |      |
|-------|-----|--------------------|--------|-------|---------------------|---------------|-----------|------|
| 12-02 | Gp3 | g.chr7:77755597G>C | Intron | MAGI2 | membrane associated | gu 29 (0.00)  | 11 (0.64) | 1.70 |
| 12-02 | Gp3 | g.chr7:77770970C>G | Intron | MAGI2 | membrane associated | gu 74 (0.01)  | 49 (0.18) | 0.49 |
| 12-02 | Gp3 | g.chr7:77779861C>A | Intron | MAGI2 | membrane associated | gu 96 (0.00)  | 29 (0.21) | 0.55 |
| 12-02 | Gp3 | g.chr7:77782609C>G | Intron | MAGI2 | membrane associated | gu 89 (0.00)  | 19 (0.32) | 0.84 |
| 12-02 | Gp3 | g.chr7:77799627C>A | Intron | MAGI2 | membrane associated | gu 68 (0.00)  | 34 (0.32) | 0.86 |
| 12-02 | Gp3 | g.chr7:77818474C>T | Intron | MAGI2 | membrane associated | gu 42 (0.00)  | 24 (0.25) | 0.67 |
| 12-02 | Gp3 | g.chr7:77841678A>T | Intron | MAGI2 | membrane associated | gu 59 (0.00)  | 38 (0.16) | 0.42 |
| 12-02 | Gp3 | g.chr7:77855981C>T | Intron | MAGI2 | membrane associated | gu 120 (0.01) | 95 (0.19) | 0.51 |
| 12-02 | Gp3 | g.chr7:77892735C>A | Intron | MAGI2 | membrane associated | gu 80 (0.00)  | 42 (0.17) | 0.44 |
| 12-02 | Gp3 | g.chr7:77914165G>T | Intron | MAGI2 | membrane associated | gu 155 (0.00) | 56 (0.36) | 0.95 |
| 12-02 | Gp3 | g.chr7:77916281G>A | Intron | MAGI2 | membrane associated | gu 139 (0.00) | 82 (0.35) | 0.94 |
| 12-02 | Gp3 | g.chr7:77934909C>A | Intron | MAGI2 | membrane associated | gu 76 (0.00)  | 46 (0.17) | 0.46 |
| 12-02 | Gp3 | g.chr7:77955528T>C | Intron | MAGI2 | membrane associated | gu 100 (0.00) | 70 (0.19) | 0.50 |
| 12-02 | Gp3 | g.chr7:77965253C>G | Intron | MAGI2 | membrane associated | gu 68 (0.00)  | 35 (0.23) | 0.61 |
| 12-02 | Gp3 | g.chr7:77983177C>G | Intron | MAGI2 | membrane associated | gu 41 (0.00)  | 16 (0.44) | 1.17 |
| 12-02 | Gp3 | g.chr7:77990023C>A | Intron | MAGI2 | membrane associated | gu 50 (0.00)  | 31 (0.32) | 0.86 |
| 12-02 | Gp3 | g.chr7:77996737G>A | Intron | MAGI2 | membrane associated | gu 129 (0.01) | 44 (0.50) | 1.33 |
| 12-02 | Gp3 | g.chr7:77998895C>T | Intron | MAGI2 | membrane associated | gu 17 (0.00)  | 32 (0.25) | 0.67 |
| 12-02 | Gp3 | g.chr7:78002354G>T | Intron | MAGI2 | membrane associated | gu 88 (0.00)  | 43 (0.21) | 0.56 |
| 12-02 | Gp3 | g.chr7:78019019C>A | Intron | MAGI2 | membrane associated | gu 149 (0.00) | 44 (0.27) | 0.73 |
| 12-02 | Gp3 | g.chr7:78019954G>T | Intron | MAGI2 | membrane associated | gu 84 (0.01)  | 24 (0.46) | 1.22 |
| 12-02 | Gp3 | g.chr7:78020090C>A | Intron | MAGI2 | membrane associated | gu 64 (0.00)  | 29 (0.17) | 0.46 |
| 12-02 | Gp3 | g.chr7:78022544C>A | Intron | MAGI2 | membrane associated | gu 63 (0.00)  | 30 (0.17) | 0.44 |
| 12-02 | Gp3 | g.chr7:78023841G>A | Intron | MAGI2 | membrane associated | gu 37 (0.00)  | 16 (0.31) | 0.83 |
| 12-02 | Gp3 | g.chr7:78024045C>G | Intron | MAGI2 | membrane associated | gu 98 (0.00)  | 32 (0.34) | 0.92 |
| 12-02 | Gp3 | g.chr7:78025817T>C | Intron | MAGI2 | membrane associated | gu 115 (0.00) | 20 (0.45) | 1.20 |
| 12-02 | Gp3 | g.chr7:78038943G>T | Intron | MAGI2 | membrane associated | gu 30 (0.00)  | 18 (0.28) | 0.74 |
| 12-02 | Gp3 | g.chr7:78039802G>T | Intron | MAGI2 | membrane associated | gu 65 (0.00)  | 36 (0.22) | 0.59 |
| 12-02 | Gp3 | g.chr7:78070434A>G | Intron | MAGI2 | membrane associated | gu 25 (0.00)  | 16 (0.44) | 1.17 |
| 12-02 | Gp3 | g.chr7:78094657G>T | Intron | MAGI2 | membrane associated | gu 133 (0.00) | 55 (0.22) | 0.58 |
| 12-02 | Gp3 | g.chr7:78096658G>T | Intron | MAGI2 | membrane associated | gu 76 (0.00)  | 28 (0.29) | 0.76 |
| 12-02 | Gp3 | g.chr7:78096662C>T | Intron | MAGI2 | membrane associated | gu 76 (0.00)  | 26 (0.46) | 1.23 |
| 12-02 | Gp3 | g.chr7:78162921C>T | Intron | MAGI2 | membrane associated | gu 25 (0.00)  | 26 (0.19) | 0.51 |
| 12-02 | Gp3 | g.chr7:78195659C>T | Intron | MAGI2 | membrane associated | gu 45 (0.00)  | 17 (0.82) | 2.20 |
| 12-02 | Gp3 | g.chr7:78197986C>A | Intron | MAGI2 | membrane associated | gu 111 (0.00) | 65 (0.22) | 0.57 |

|       |     |                    |        |       |                     |               |            |      |
|-------|-----|--------------------|--------|-------|---------------------|---------------|------------|------|
| 12-02 | Gp3 | g.chr7:78220652G>A | Intron | MAGI2 | membrane associated | gu 99 (0.00)  | 17 (0.53)  | 1.41 |
| 12-02 | Gp3 | g.chr7:78295348C>G | Intron | MAGI2 | membrane associated | gu 110 (0.00) | 75 (0.25)  | 0.68 |
| 12-02 | Gp3 | g.chr7:78339199C>T | Intron | MAGI2 | membrane associated | gu 147 (0.00) | 106 (0.23) | 0.60 |
| 12-02 | Gp3 | g.chr7:78356982G>T | Intron | MAGI2 | membrane associated | gu 42 (0.00)  | 23 (0.35)  | 0.93 |
| 12-02 | Gp3 | g.chr7:78359263G>T | Intron | MAGI2 | membrane associated | gu 46 (0.00)  | 11 (0.73)  | 1.94 |
| 12-02 | Gp3 | g.chr7:78385398C>A | Intron | MAGI2 | membrane associated | gu 59 (0.00)  | 27 (0.19)  | 0.49 |
| 12-02 | Gp3 | g.chr7:78389980G>A | Intron | MAGI2 | membrane associated | gu 147 (0.00) | 40 (0.15)  | 0.40 |
| 12-02 | Gp3 | g.chr7:78397837C>T | Intron | MAGI2 | membrane associated | gu 85 (0.00)  | 25 (0.28)  | 0.75 |
| 12-02 | Gp3 | g.chr7:78446769A>T | Intron | MAGI2 | membrane associated | gu 31 (0.00)  | 12 (0.75)  | 2.00 |
| 12-02 | Gp3 | g.chr7:78563708C>T | Intron | MAGI2 | membrane associated | gu 40 (0.00)  | 29 (0.31)  | 0.83 |
| 12-02 | Gp3 | g.chr7:78607358G>T | Intron | MAGI2 | membrane associated | gu 53 (0.00)  | 35 (0.20)  | 0.53 |
| 12-02 | Gp3 | g.chr7:78632353G>A | Intron | MAGI2 | membrane associated | gu 64 (0.00)  | 23 (0.26)  | 0.70 |
| 12-02 | Gp3 | g.chr7:78649486C>A | Intron | MAGI2 | membrane associated | gu 19 (0.00)  | 17 (0.47)  | 1.25 |
| 12-02 | Gp3 | g.chr7:78674202C>A | Intron | MAGI2 | membrane associated | gu 62 (0.00)  | 60 (0.28)  | 0.76 |
| 12-02 | Gp3 | g.chr7:78692772C>A | Intron | MAGI2 | membrane associated | gu 119 (0.00) | 33 (0.18)  | 0.48 |
| 12-02 | Gp3 | g.chr7:78692787C>A | Intron | MAGI2 | membrane associated | gu 114 (0.00) | 35 (0.14)  | 0.38 |
| 12-02 | Gp3 | g.chr7:78693958C>A | Intron | MAGI2 | membrane associated | gu 102 (0.00) | 35 (0.14)  | 0.38 |
| 12-02 | Gp3 | g.chr7:78704369G>A | Intron | MAGI2 | membrane associated | gu 36 (0.00)  | 40 (0.38)  | 1.00 |
| 12-02 | Gp3 | g.chr7:78704373C>A | Intron | MAGI2 | membrane associated | gu 63 (0.00)  | 44 (0.27)  | 0.73 |
| 12-02 | Gp3 | g.chr7:78706524A>T | Intron | MAGI2 | membrane associated | gu 77 (0.00)  | 68 (0.16)  | 0.43 |
| 12-02 | Gp3 | g.chr7:78710205C>G | Intron | MAGI2 | membrane associated | gu 67 (0.00)  | 17 (0.41)  | 1.10 |
| 12-02 | Gp3 | g.chr7:78740143C>A | Intron | MAGI2 | membrane associated | gu 81 (0.00)  | 27 (0.33)  | 0.89 |
| 12-02 | Gp3 | g.chr7:78754062C>A | Intron | MAGI2 | membrane associated | gu 136 (0.00) | 23 (0.35)  | 0.93 |
| 12-02 | Gp3 | g.chr7:78773505T>C | Intron | MAGI2 | membrane associated | gu 34 (0.00)  | 43 (0.23)  | 0.62 |
| 12-02 | Gp3 | g.chr7:78786400C>A | Intron | MAGI2 | membrane associated | gu 69 (0.00)  | 19 (0.37)  | 0.98 |
| 12-02 | Gp3 | g.chr7:78786401T>A | Intron | MAGI2 | membrane associated | gu 68 (0.00)  | 19 (0.32)  | 0.84 |
| 12-02 | Gp3 | g.chr7:78788564G>T | Intron | MAGI2 | membrane associated | gu 40 (0.00)  | 31 (0.23)  | 0.60 |
| 12-02 | Gp3 | g.chr7:78841051G>T | Intron | MAGI2 | membrane associated | gu 37 (0.00)  | 18 (0.28)  | 0.74 |
| 12-02 | Gp3 | g.chr7:78895046G>T | Intron | MAGI2 | membrane associated | gu 54 (0.02)  | 40 (0.33)  | 0.87 |
| 12-02 | Gp3 | g.chr7:78908180G>T | Intron | MAGI2 | membrane associated | gu 62 (0.00)  | 37 (0.32)  | 0.86 |
| 12-02 | Gp3 | g.chr7:78913542G>T | Intron | MAGI2 | membrane associated | gu 88 (0.00)  | 68 (0.16)  | 0.43 |
| 12-02 | Gp3 | g.chr7:78916423G>T | Intron | MAGI2 | membrane associated | gu 77 (0.00)  | 29 (0.17)  | 0.46 |
| 12-02 | Gp3 | g.chr7:78920318A>T | Intron | MAGI2 | membrane associated | gu 27 (0.00)  | 18 (0.50)  | 1.33 |
| 12-02 | Gp3 | g.chr7:78927021G>A | Intron | MAGI2 | membrane associated | gu 104 (0.00) | 104 (0.22) | 0.59 |
| 12-02 | Gp3 | g.chr7:78945243C>G | Intron | MAGI2 | membrane associated | gu 25 (0.00)  | 25 (0.20)  | 0.53 |

|       |     |                      |                   |         |          |                          |            |            |      |
|-------|-----|----------------------|-------------------|---------|----------|--------------------------|------------|------------|------|
| 12-02 | Gp3 | g.chr7:78981504T>C   | Intron            | MAGI2   |          | membrane associated gu   | 55 (0.00)  | 27 (0.22)  | 0.59 |
| 12-02 | Gp3 | g.chr7:78982789G>T   | Intron            | MAGI2   |          | membrane associated gu   | 29 (0.00)  | 26 (0.19)  | 0.51 |
| 12-02 | Gp3 | g.chr7:78995588T>A   | Intron            | MAGI2   |          | membrane associated gu   | 35 (0.00)  | 26 (0.69)  | 1.85 |
| 12-02 | Gp3 | g.chr7:78998973G>A   | Intron            | MAGI2   |          | membrane associated gu   | 105 (0.00) | 21 (0.24)  | 0.63 |
| 12-02 | Gp3 | g.chr7:79015073G>A   | Intron            | MAGI2   |          | membrane associated gu   | 95 (0.00)  | 18 (0.33)  | 0.89 |
| 12-02 | Gp3 | g.chr7:79023825C>A   | Intron            | MAGI2   |          | membrane associated gu   | 98 (0.00)  | 14 (0.71)  | 1.90 |
| 12-02 | Gp3 | g.chr7:79028788T>A   | Intron            | MAGI2   |          | membrane associated gu   | 22 (0.00)  | 33 (0.24)  | 0.65 |
| 12-02 | Gp3 | g.chr7:79028803G>A   | Intron            | MAGI2   |          | membrane associated gu   | 22 (0.00)  | 31 (0.26)  | 0.69 |
| 12-02 | Gp3 | g.chr7:79028824G>A   | Intron            | MAGI2   |          | membrane associated gu   | 23 (0.00)  | 44 (0.23)  | 0.61 |
| 12-02 | Gp3 | g.chr7:79035867G>A   | Intron            | MAGI2   |          | membrane associated gu   | 112 (0.00) | 62 (0.16)  | 0.43 |
| 12-02 | Gp3 | g.chr7:79042179C>A   | Intron            | MAGI2   |          | membrane associated gu   | 47 (0.00)  | 18 (0.28)  | 0.74 |
| 12-02 | Gp3 | g.chr7:79059784A>T   | Intron            | MAGI2   |          | membrane associated gu   | 19 (0.00)  | 12 (0.50)  | 1.33 |
| 12-02 | Gp3 | g.chr11:95826314C>T  | Missense Mutation | MAML2   | p.G294E  | mastermind-like 2 (Dros  | 19 (0.00)  | 29 (0.17)  | 0.46 |
| 12-02 | Gp3 | g.chr4:140811863G>A  | Silent            | MAML3   | p.L243L  | mastermind-like 3 (Dros  | 63 (0.00)  | 39 (0.41)  | 1.09 |
| 12-02 | Gp3 | g.chr5:109117251C>T  | Missense Mutation | MAN2A1  | p.S510F  | mannosidase, alpha, cla  | 60 (0.00)  | 11 (0.64)  | 1.70 |
| 12-02 | Gp3 | g.chr2:210559026C>G  | Missense Mutation | MAP2    | p.S711C  | microtubule-associated j | 50 (0.02)  | 75 (0.60)  | 1.60 |
| 12-02 | Gp3 | g.chr6:161529815C>A  | Missense Mutation | MAP3K4  | p.T1387N | mitogen-activated protei | 45 (0.00)  | 23 (0.26)  | 0.70 |
| 12-02 | Gp3 | g.chr9:128305365G>A  | Nonsense Mutation | MAPKAP1 | p.R311*  | mitogen-activated protei | 44 (0.00)  | 29 (0.24)  | 0.64 |
| 12-02 | Gp3 | g.chr11:63665702A>G  | Splice Site       | MARK2   |          | MAP/microtubule affini   | 31 (0.00)  | 26 (0.19)  | 0.51 |
| 12-02 | Gp3 | g.chr1:11087099C>T   | Missense Mutation | MASP2   | p.G635E  | mannan-binding lectin s  | 20 (0.00)  | 14 (0.36)  | 0.95 |
| 12-02 | Gp3 | g.chr3:152174109G>T  | Missense Mutation | MBNL1   | p.A351S  | muscleblind-like splicin | 67 (0.00)  | 59 (0.20)  | 0.54 |
| 12-02 | Gp3 | g.chr6:52142393C>T   | Missense Mutation | MCM3    | p.V325M  | minichromosome mainte    | 75 (0.00)  | 30 (0.17)  | 0.44 |
| 12-02 | Gp3 | g.chr6:90494761C>A   | Silent            | MDN1    | p.L473L  | MDN1, midasin homolo     | 61 (0.00)  | 30 (0.27)  | 0.71 |
| 12-02 | Gp3 | g.chr17:60039055G>A  | Missense Mutation | MED13   | p.S1717L | mediator complex subur   | 78 (0.01)  | 83 (0.13)  | 0.44 |
| 12-02 | Gp3 | g.chr15:37187357G>A  | Missense Mutation | MEIS2   | p.P374L  | Meis homeobox 2          | 21 (0.00)  | 26 (0.27)  | 0.72 |
| 12-02 | Gp3 | g.chr18:29790522G>T  | Silent            | MEP1B   | p.V326V  | meprin A, beta           | 63 (0.00)  | 84 (0.19)  | 0.51 |
| 12-02 | Gp3 | g.chr10:126454042T>C | Missense Mutation | METTL10 | p.R179G  | methyltransferase like 1 | 77 (0.00)  | 58 (0.16)  | 0.41 |
| 12-02 | Gp3 | g.chr11:28318444C>A  | Silent            | METTL15 | p.I248I  | methyltransferase like 1 | 41 (0.00)  | 23 (0.22)  | 0.58 |
| 12-02 | Gp3 | g.chr15:42052536C>A  | Missense Mutation | MGA     | p.L2403I | MGA, MAX dimerizati      | 16 (0.00)  | 20 (0.35)  | 0.93 |
| 12-02 | Gp3 | g.chr7:141734557G>T  | Missense Mutation | MGAM    | p.W625C  | maltase-glucoamylase (   | 58 (0.00)  | 43 (0.42)  | 1.12 |
| 12-02 | Gp3 | g.chr18:19371374T>A  | Silent            | MIB1    | p.I316I  | mindbomb E3 ubiquitin    | 52 (0.00)  | 71 (0.18)  | 0.49 |
| 12-02 | Gp3 | g.chr6:109773601A>G  | Missense Mutation | MICAL1  | p.F227S  | microtubule associated r | 15 (0.00)  | 16 (0.44)  | 1.17 |
| 12-02 | Gp3 | g.chr11:12315226C>T  | Missense Mutation | MICALCL | p.P83L   | MICAL C-terminal like    | 77 (0.00)  | 28 (0.25)  | 0.67 |
| 12-02 | Gp3 | g.chr10:74183031G>T  | Silent            | MICU1   | p.A344A  | mitochondrial calcium u  | 52 (0.00)  | 147 (0.14) | 0.38 |
| 12-02 | Gp3 | g.chr7:7625274G>A    | Silent            | MIOS    | p.L552L  | missing oocyte, meiosis  | 58 (0.00)  | 24 (0.54)  | 1.08 |

|       |     |                     |                   |        |           |                           |            |            |      |
|-------|-----|---------------------|-------------------|--------|-----------|---------------------------|------------|------------|------|
| 12-02 | Gp3 | g.chr6:168276056C>G | Missense Mutation | MLLT4  | p.P207R   | myeloid/lymphoid or mi    | 137 (0.00) | 42 (0.21)  | 0.57 |
| 12-02 | Gp3 | g.chr21:37741608G>A | Missense Mutation | MORC3  | p.V648I   | MORC family CW-type       | 51 (0.00)  | 44 (0.39)  | 1.03 |
| 12-02 | Gp3 | g.chr9:124931935G>C | Silent            | MORN5  | p.T69T    | MORN repeat containin     | 22 (0.00)  | 37 (0.51)  | 1.37 |
| 12-02 | Gp3 | g.chr5:41004471G>A  | Nonsense Mutation | MROH2B | p.Q1391*  | maestro heat-like repeat  | 98 (0.00)  | 28 (0.29)  | 0.76 |
| 12-02 | Gp3 | g.chr2:86433369A>G  | Missense Mutation | MRPL35 | p.T62A    | mitochondrial ribosoma    | 27 (0.00)  | 45 (0.42)  | 1.13 |
| 12-02 | Gp3 | g.chr1:54678305C>G  | Missense Mutation | MRPL37 | p.L322V   | mitochondrial ribosoma    | 32 (0.00)  | 38 (0.16)  | 0.42 |
| 12-02 | Gp3 | g.chr2:224824599G>A | Silent            | MRPL44 | p.E176E   | mitochondrial ribosoma    | 41 (0.00)  | 36 (0.25)  | 0.67 |
| 12-02 | Gp3 | g.chr2:48013130G>A  | Intron            | MSH6   |           | mutS homolog 6            | 55 (0.00)  | 36 (0.36)  | 0.96 |
| 12-02 | Gp3 | g.chr2:48027325C>A  | Missense Mutation | MSH6   | p.L735I   | mutS homolog 6            | 20 (0.00)  | 27 (0.33)  | 0.89 |
| 12-02 | Gp3 | g.chr13:28014376C>T | Silent            | MTIF3  | p.K70K    | mitochondrial translatio  | 92 (0.01)  | 70 (0.36)  | 0.95 |
| 12-02 | Gp3 | g.chr22:30416263G>C | Missense Mutation | MTMR3  | p.G736A   | myotubularin related pro  | 17 (0.00)  | 36 (0.17)  | 0.44 |
| 12-02 | Gp3 | g.chr4:187455076C>A | Nonsense Mutation | MTNR1A | p.E274*   | melatonin receptor 1A     | 23 (0.00)  | 34 (0.15)  | 0.39 |
| 12-02 | Gp3 | g.chr1:237060884C>T | Silent            | MTR    | p.N1246N  | 5-methyltetrahydrofolat   | 27 (0.00)  | 14 (0.50)  | 1.33 |
| 12-02 | Gp3 | g.chr13:29608061C>A | Missense Mutation | MTUS2  | p.P759T   | microtubule associated t  | 78 (0.00)  | 79 (0.68)  | 1.82 |
| 12-02 | Gp3 | g.chr19:9027552G>C  | Missense Mutation | MUC16  | p.P12198A | mucin 16, cell surface a: | 33 (0.00)  | 40 (0.25)  | 0.67 |
| 12-02 | Gp3 | g.chr19:9070079C>G  | Silent            | MUC16  | p.T5789T  | mucin 16, cell surface a: | 33 (0.00)  | 22 (0.41)  | 1.09 |
| 12-02 | Gp3 | g.chr19:9075406T>A  | Missense Mutation | MUC16  | p.T4014S  | mucin 16, cell surface a: | 16 (0.00)  | 14 (0.57)  | 1.52 |
| 12-02 | Gp3 | g.chr19:9075758C>A  | Missense Mutation | MUC16  | p.E3896D  | mucin 16, cell surface a: | 17 (0.00)  | 22 (0.27)  | 0.73 |
| 12-02 | Gp3 | g.chr19:9076754C>A  | Missense Mutation | MUC16  | p.M3564I  | mucin 16, cell surface a: | 52 (0.00)  | 26 (0.19)  | 0.51 |
| 12-02 | Gp3 | g.chr7:100676618G>A | Missense Mutation | MUC17  | p.V641M   | mucin 17, cell surface a: | 37 (0.00)  | 30 (0.30)  | 0.80 |
| 12-02 | Gp3 | g.chr7:100678412C>T | Missense Mutation | MUC17  | p.L1239F  | mucin 17, cell surface a: | 91 (0.00)  | 45 (0.16)  | 0.41 |
| 12-02 | Gp3 | g.chr7:100678998C>G | Missense Mutation | MUC17  | p.T1434S  | mucin 17, cell surface a: | 50 (0.00)  | 25 (0.20)  | 0.53 |
| 12-02 | Gp3 | g.chr7:100680511G>T | Silent            | MUC17  | p.V1938V  | mucin 17, cell surface a: | 64 (0.02)  | 44 (0.48)  | 1.27 |
| 12-02 | Gp3 | g.chr7:100551722A>T | Missense Mutation | MUC3A  | p.D158V   | mucin 3A, cell surface a  | 360 (0.00) | 239 (0.23) | 0.62 |
| 12-02 | Gp3 | g.chr6:135521492C>T | Missense Mutation | MYB    | p.S630F   | v-myb avian myeloblast    | 74 (0.00)  | 48 (0.23)  | 0.61 |
| 12-02 | Gp3 | g.chr1:109839792C>G | Missense Mutation | MYBPHL | p.Q150H   | myosin binding protein    | 17 (0.00)  | 32 (0.25)  | 0.67 |
| 12-02 | Gp3 | g.chr15:48443700G>C | Missense Mutation | MYEF2  | p.Q426E   | myelin expression facto   | 312 (0.00) | 85 (0.55)  | 1.47 |
| 12-02 | Gp3 | g.chr17:10542235C>A | Missense Mutation | MYH3   | p.E1098D  | myosin, heavy chain 3, s  | 39 (0.00)  | 18 (0.28)  | 0.50 |
| 12-02 | Gp3 | g.chr2:211159091G>C | Missense Mutation | MYL1   | p.A75G    | myosin, light chain 1, al | 26 (0.00)  | 36 (0.67)  | 1.78 |
| 12-02 | Gp3 | g.chr22:26239710G>A | Missense Mutation | MYO18B | p.A1074T  | myosin XVIIIIB            | 34 (0.00)  | 16 (0.38)  | 1.00 |
| 12-02 | Gp3 | g.chr2:192250614C>T | Missense Mutation | MYO1B  | p.T453I   | myosin IB                 | 93 (0.00)  | 59 (0.36)  | 0.66 |
| 12-02 | Gp3 | g.chr17:30986230C>A | Missense Mutation | MYO1D  | p.V662F   | myosin ID                 | 58 (0.00)  | 42 (0.14)  | 0.38 |
| 12-02 | Gp3 | g.chr2:171264324C>A | Missense Mutation | MYO3B  | p.Q874K   | myosin IIIB               | 97 (0.00)  | 44 (0.27)  | 0.42 |
| 12-02 | Gp3 | g.chr15:52529831G>T | Missense Mutation | MYO5C  | p.H906N   | myosin VC                 | 72 (0.00)  | 25 (0.32)  | 0.85 |
| 12-02 | Gp3 | g.chr19:17256230C>A | Silent            | MYO9B  | p.A288A   | myosin IXB                | 29 (0.00)  | 44 (0.11)  | 0.39 |

|       |     |                      |                   |        |          |                           |            |            |      |
|-------|-----|----------------------|-------------------|--------|----------|---------------------------|------------|------------|------|
| 12-02 | Gp3 | g.chr13:21331659G>C  | Missense Mutation | N6AMT2 | p.Q27E   | N-6 adenine-specific D    | 53 (0.00)  | 24 (0.21)  | 0.71 |
| 12-02 | Gp3 | g.chr13:41929301G>T  | Missense Mutation | NAA16  | p.V346F  | N(alpha)-acetyltransfera  | 16 (0.00)  | 25 (0.20)  | 0.53 |
| 12-02 | Gp3 | g.chr12:56619448G>T  | Missense Mutation | NABP2  | p.G87C   | nucleic acid binding pro  | 43 (0.00)  | 21 (0.24)  | 0.63 |
| 12-02 | Gp3 | g.chr13:35738568C>A  | Silent            | NBEA   | p.L1385L | neurobeachin              | 70 (0.00)  | 20 (0.40)  | 1.07 |
| 12-02 | Gp3 | g.chr13:36167547C>T  | Missense Mutation | NBEA   | p.S2417F | neurobeachin              | 62 (0.00)  | 21 (0.57)  | 1.52 |
| 12-02 | Gp3 | g.chr1:16890529C>A   | Missense Mutation | NBPF1  | p.S1110I | neuroblastoma breakpoi    | 65 (0.00)  | 51 (0.25)  | 0.68 |
| 12-02 | Gp3 | g.chr12:6626552C>A   | Missense Mutation | NCAPD2 | p.Q403K  | non-SMC condensin I c     | 48 (0.02)  | 30 (0.27)  | 0.50 |
| 12-02 | Gp3 | g.chr11:134072770C>T | Missense Mutation | NCAPD3 | p.R519H  | non-SMC condensin II c    | 58 (0.00)  | 31 (0.19)  | 0.52 |
| 12-02 | Gp3 | g.chr2:97020022C>A   | Silent            | NCAPH  | p.S357S  | non-SMC condensin I c     | 48 (0.00)  | 49 (0.37)  | 0.98 |
| 12-02 | Gp3 | g.chr1:183533160T>C  | Missense Mutation | NCF2   | p.K336E  | neutrophil cytosolic fact | 25 (0.00)  | 28 (0.32)  | 0.86 |
| 12-02 | Gp3 | g.chr8:71068389G>T   | Silent            | NCOA2  | p.P737P  | nuclear receptor coactiv  | 158 (0.00) | 176 (0.20) | 0.55 |
| 12-02 | Gp3 | g.chr8:71087012C>T   | Silent            | NCOA2  | p.A114A  | nuclear receptor coactiv  | 263 (0.00) | 113 (0.19) | 0.50 |
| 12-02 | Gp3 | g.chr20:33329126G>A  | Missense Mutation | NCOA6  | p.S1645L | nuclear receptor coactiv  | 45 (0.00)  | 25 (0.40)  | 1.07 |
| 12-02 | Gp3 | g.chr9:132980150G>C  | Silent            | NCS1   | p.L43L   | neuronal calcium sensor   | 26 (0.00)  | 25 (0.20)  | 0.67 |
| 12-02 | Gp3 | g.chr1:54238006G>T   | Missense Mutation | NDC1   | p.L653M  | NDC1 transmembrane n      | 80 (0.00)  | 37 (0.30)  | 0.79 |
| 12-02 | Gp3 | g.chr2:152548609G>A  | Silent            | NEB    | p.H690H  | nebulin                   | 91 (0.00)  | 26 (0.23)  | 0.43 |
| 12-02 | Gp3 | g.chr8:24775274G>T   | Nonsense Mutation | NEFM   | p.E636*  | neurofilament, medium     | 42 (0.00)  | 29 (0.31)  | 0.83 |
| 12-02 | Gp3 | g.chr4:170359313A>T  | Missense Mutation | NEK1   | p.D895E  | NIMA-related kinase 1     | 77 (0.00)  | 14 (0.36)  | 0.95 |
| 12-02 | Gp3 | g.chr3:130947490C>A  | Silent            | NEK11  | p.I401I  | NIMA-related kinase 11    | 63 (0.00)  | 48 (0.19)  | 0.50 |
| 12-02 | Gp3 | g.chr13:52709999C>A  | Splice Site       | NEK3   | p.G375V  | NIMA-related kinase 3     | 46 (0.00)  | 30 (0.33)  | 0.89 |
| 12-02 | Gp3 | g.chr3:52773513T>A   | Missense Mutation | NEK4   | p.D698V  | NIMA-related kinase 4     | 59 (0.00)  | 31 (0.23)  | 0.60 |
| 12-02 | Gp3 | g.chr14:75553807C>G  | Missense Mutation | NEK9   | p.A911P  | NIMA-related kinase 9     | 118 (0.00) | 62 (0.15)  | 0.39 |
| 12-02 | Gp3 | g.chr14:75553829C>A  | Missense Mutation | NEK9   | p.Q903H  | NIMA-related kinase 9     | 109 (0.01) | 47 (0.17)  | 0.45 |
| 12-02 | Gp3 | g.chr14:75580067G>A  | Missense Mutation | NEK9   | p.R305C  | NIMA-related kinase 9     | 96 (0.00)  | 15 (0.33)  | 0.89 |
| 12-02 | Gp3 | g.chr12:44915795C>A  | Missense Mutation | NELL2  | p.Q721H  | NEL-like 2 (chicken)      | 25 (0.00)  | 20 (0.30)  | 0.80 |
| 12-02 | Gp3 | g.chr11:74705641C>A  | Missense Mutation | NEU3   | p.A61D   | sialidase 3 (membrane s   | 35 (0.00)  | 81 (0.42)  | 1.12 |
| 12-02 | Gp3 | g.chr13:39621997A>C  | Missense Mutation | NHLRC3 | p.E129D  | NHL repeat containing     | 41 (0.00)  | 19 (0.47)  | 1.26 |
| 12-02 | Gp3 | g.chr14:51223253G>T  | Missense Mutation | NIN    | p.Q1499K | ninein (GSK3B interacti   | 15 (0.00)  | 34 (0.21)  | 0.55 |
| 12-02 | Gp3 | g.chr5:36976361C>T   | Missense Mutation | NIPBL  | p.S451F  | Nipped-B homolog (Drc     | 32 (0.00)  | 25 (0.36)  | 0.96 |
| 12-02 | Gp3 | g.chr15:85198635C>A  | Missense Mutation | NMB    | p.R112S  | neuromedin B              | 29 (0.00)  | 34 (0.15)  | 0.39 |
| 12-02 | Gp3 | g.chr1:6592071A>G    | Missense Mutation | NOL9   | p.M535T  | nucleolar protein 9       | 39 (0.00)  | 42 (0.14)  | 0.38 |
| 12-02 | Gp3 | g.chr16:18549858C>T  | Missense Mutation | NOMO2  | p.V404I  | NODAL modulator 2         | 70 (0.00)  | 52 (0.17)  | 0.46 |
| 12-02 | Gp3 | g.chr12:117660574C>A | Missense Mutation | NOS1   | p.K1341N | nitric oxide synthase 1   | 23 (0.00)  | 43 (0.42)  | 0.66 |
| 12-02 | Gp3 | g.chr2:101582125A>T  | Silent            | NPAS2  | p.A268A  | neuronal PAS domain p     | 40 (0.00)  | 30 (0.27)  | 0.71 |
| 12-02 | Gp3 | g.chr4:106861271G>T  | Missense Mutation | NPNT   | p.R212I  | nephronectin              | 44 (0.00)  | 27 (0.19)  | 0.49 |



|       |     |                      |                   |            |          |                                      |            |      |
|-------|-----|----------------------|-------------------|------------|----------|--------------------------------------|------------|------|
| 12-02 | Gp3 | g.chr4:164271943C>A  | Missense Mutation | NPY5R      | p.P173H  | neuropeptide Y receptor 17 (0.00)    | 29 (0.17)  | 0.46 |
| 12-02 | Gp3 | g.chr5:137143848C>A  | RNA               | NPY6R      |          | neuropeptide Y receptor 24 (0.00)    | 15 (0.33)  | 0.89 |
| 12-02 | Gp3 | g.chr2:27663733G>T   | Nonsense Mutation | NRBP1      | p.E419*  | nuclear receptor binding 23 (0.00)   | 40 (0.25)  | 0.67 |
| 12-02 | Gp3 | g.chr10:84744877C>A  | Missense Mutation | NRG3       | p.T536N  | neuregulin 3 75 (0.00)               | 59 (0.17)  | 0.45 |
| 12-02 | Gp3 | g.chr2:50723149C>A   | Missense Mutation | NRXN1      | p.W1028C | neurexin 1 123 (0.00)                | 37 (0.16)  | 0.43 |
| 12-02 | Gp3 | g.chr2:50765399C>A   | Missense Mutation | NRXN1      | p.C752F  | neurexin 1 94 (0.00)                 | 78 (0.15)  | 0.41 |
| 12-02 | Gp3 | g.chr17:28445147C>T  | Nonsense Mutation | NSRP1      | p.Q24*   | nuclear speckle splicing 41 (0.00)   | 26 (0.73)  | 1.95 |
| 12-02 | Gp3 | g.chr4:40778121A>T   | Missense Mutation | NSUN7      | p.D294V  | NOP2/Sun domain fami 15 (0.00)       | 24 (0.54)  | 1.44 |
| 12-02 | Gp3 | g.chr12:104187031C>T | Missense Mutation | NT5DC3     | p.M310I  | 5'-nucleotidase domain (99 (0.00)    | 44 (0.59)  | 0.94 |
| 12-02 | Gp3 | g.chr12:104187755G>C | Missense Mutation | NT5DC3     | p.H258Q  | 5'-nucleotidase domain (35 (0.00)    | 27 (0.26)  | 0.41 |
| 12-02 | Gp3 | g.chr8:27891131C>T   | Silent            | NUGGC      | p.A565A  | nuclear GTPase, germin 24 (0.00)     | 25 (0.20)  | 0.53 |
| 12-02 | Gp3 | g.chr9:134019861G>A  | Missense Mutation | NUP214     | p.G497R  | nucleoporin 214kDa 97 (0.00)         | 117 (0.25) | 0.66 |
| 12-02 | Gp3 | g.chr9:134021619A>T  | Missense Mutation | NUP214     | p.S625C  | nucleoporin 214kDa 82 (0.00)         | 47 (0.15)  | 0.40 |
| 12-02 | Gp3 | g.chrX:106418365G>A  | Silent            | NUP62CL    | p.T4T    | nucleoporin 62kDa C-te 56 (0.00)     | 17 (0.29)  | 0.49 |
| 12-02 | Gp3 | g.chr10:88971944T>G  | RNA               | NUTM2A-AS1 |          | NUTM2A antisense RN 30 (0.00)        | 52 (0.15)  | 0.41 |
| 12-02 | Gp3 | g.chr1:228432058G>C  | Silent            | OBSCN      | p.G1181G | obscurin, cytoskeletal c 59 (0.00)   | 81 (0.15)  | 0.40 |
| 12-02 | Gp3 | g.chr10:74658447C>A  | Silent            | OIT3       | p.I29I   | oncoprotein induced tra 17 (0.00)    | 38 (0.18)  | 0.49 |
| 12-02 | Gp3 | g.chr1:161954601G>A  | Silent            | OLFML2B    | p.F549F  | olfactomedin-like 2B 26 (0.00)       | 16 (0.31)  | 0.83 |
| 12-02 | Gp3 | g.chr12:10313444G>T  | Missense Mutation | OLR1       | p.Q169K  | oxidized low density lip 98 (0.00)   | 31 (0.29)  | 0.54 |
| 12-02 | Gp3 | g.chr12:10313445G>C  | Missense Mutation | OLR1       | p.S168R  | oxidized low density lip 99 (0.00)   | 31 (0.29)  | 0.54 |
| 12-02 | Gp3 | g.chr10:13151224G>A  | Silent            | OPTN       | p.T34T   | optineurin 47 (0.00)                 | 41 (0.17)  | 0.46 |
| 12-02 | Gp3 | g.chr14:22038437C>A  | Missense Mutation | OR10G3     | p.A147S  | olfactory receptor, famil 49 (0.00)  | 39 (0.15)  | 0.41 |
| 12-02 | Gp3 | g.chr1:158435747C>T  | Silent            | OR10K1     | p.Y132Y  | olfactory receptor, famil 29 (0.00)  | 18 (0.33)  | 0.89 |
| 12-02 | Gp3 | g.chr1:247902698G>T  | Missense Mutation | OR14K1     | p.G261V  | olfactory receptor, famil 96 (0.01)  | 42 (0.14)  | 0.38 |
| 12-02 | Gp3 | g.chr7:143792432C>A  | Missense Mutation | OR2A12     | p.P78T   | olfactory receptor, famil 63 (0.00)  | 31 (0.19)  | 0.52 |
| 12-02 | Gp3 | g.chr11:6806496T>C   | Silent            | OR2AG1     | p.V76V   | olfactory receptor, famil 21 (0.00)  | 32 (0.22)  | 0.58 |
| 12-02 | Gp3 | g.chr1:248308957G>T  | Missense Mutation | OR2M5      | p.G170W  | olfactory receptor, famil 22 (0.00)  | 24 (0.25)  | 0.67 |
| 12-02 | Gp3 | g.chr8:116685G>A     | Silent            | OR4F21     | p.L114L  | olfactory receptor, famil 92 (0.00)  | 59 (0.17)  | 0.45 |
| 12-02 | Gp3 | g.chr14:20612573G>C  | Missense Mutation | OR4N5      | p.E227Q  | olfactory receptor, famil 46 (0.00)  | 42 (0.17)  | 0.44 |
| 12-02 | Gp3 | g.chr11:55418740T>A  | Missense Mutation | OR4S2      | p.Y121N  | olfactory receptor, famil 75 (0.00)  | 28 (0.29)  | 0.76 |
| 12-02 | Gp3 | g.chr11:55798515G>T  | Missense Mutation | OR5AS1     | p.Q207H  | olfactory receptor, famil 102 (0.00) | 52 (0.15)  | 0.41 |
| 12-02 | Gp3 | g.chr9:125551909G>T  | Missense Mutation | OR5C1      | p.R233L  | olfactory receptor, famil 17 (0.00)  | 60 (0.22)  | 0.58 |
| 12-02 | Gp3 | g.chr14:23103413A>G  | Missense Mutation | OR6J1      | p.F102L  | olfactory receptor, famil 64 (0.00)  | 76 (0.30)  | 0.81 |
| 12-02 | Gp3 | g.chr1:158532490C>T  | Missense Mutation | OR6P1      | p.R302K  | olfactory receptor, famil 86 (0.00)  | 51 (0.16)  | 0.42 |
| 12-02 | Gp3 | g.chr1:36886182T>C   | Missense Mutation | OSCP1      | p.E240G  | organic solute carrier pa 20 (0.00)  | 23 (0.35)  | 0.93 |

|       |     |                      |                   |         |          |                                              |            |      |
|-------|-----|----------------------|-------------------|---------|----------|----------------------------------------------|------------|------|
| 12-02 | Gp3 | g.chr2:190618749C>T  | Missense Mutation | OSGEPL1 | p.A286T  | O-sialoglycoprotein end 62 (0.00)            | 23 (0.26)  | 0.48 |
| 12-02 | Gp3 | g.chr12:80762090G>A  | Splice Site       | OTOGL   |          | otogelin-like 50 (0.00)                      | 17 (0.35)  | 0.94 |
| 12-02 | Gp3 | g.chr20:9546692C>G   | Missense Mutation | PAK7    | p.D444H  | p21 protein (Cdc42/Rac 105 (0.00)            | 80 (0.15)  | 0.40 |
| 12-02 | Gp3 | g.chr12:56726643G>T  | Missense Mutation | PAN2    | p.S79Y   | PAN2 poly(A) specific 143 (0.00)             | 58 (0.16)  | 0.41 |
| 12-02 | Gp3 | g.chr10:91353592G>T  | Missense Mutation | PANK1   | p.Q264K  | pantothenate kinase 1 92 (0.00)              | 30 (0.17)  | 0.44 |
| 12-02 | Gp3 | g.chr14:96998882C>T  | Silent            | PAPOLA  | p.L244L  | poly(A) polymerase alpha 142 (0.00)          | 33 (0.15)  | 0.40 |
| 12-02 | Gp3 | g.chr16:14676106T>C  | Missense Mutation | PARN    | p.Q375R  | poly(A)-specific ribonuc 30 (0.00)           | 24 (0.21)  | 0.56 |
| 12-02 | Gp3 | g.chr3:122437773G>T  | Missense Mutation | PARP14  | p.S1592I | poly (ADP-ribose) polymerase 159 (0.00)      | 32 (0.25)  | 0.67 |
| 12-02 | Gp3 | g.chr12:102558357G>A | Missense Mutation | PARBP   | p.A213T  | PARP1 binding protein 16 (0.00)              | 22 (0.32)  | 0.50 |
| 12-02 | Gp3 | g.chr7:154752661C>T  | Silent            | PAXIP1  | p.T792T  | PAX interacting (with tr 56 (0.00)           | 20 (0.25)  | 0.67 |
| 12-02 | Gp3 | g.chr1:154918776C>A  | Missense Mutation | PBXIP1  | p.K458N  | pre-B-cell leukemia hon 20 (0.00)            | 264 (0.16) | 0.43 |
| 12-02 | Gp3 | g.chr13:100953726G>A | Missense Mutation | PCCA    | p.V360I  | propionyl CoA carboxylase 53 (0.00)          | 27 (0.52)  | 1.38 |
| 12-02 | Gp3 | g.chr13:58298918G>T  | Silent            | PCDH17  | p.V990V  | protocadherin 17 19 (0.00)                   | 15 (0.40)  | 1.33 |
| 12-02 | Gp3 | g.chr13:61987623A>T  | Missense Mutation | PCDH20  | p.N203K  | protocadherin 20 30 (0.00)                   | 79 (0.11)  | 0.38 |
| 12-02 | Gp3 | g.chr13:61987699A>G  | Missense Mutation | PCDH20  | p.L178S  | protocadherin 20 20 (0.00)                   | 63 (0.13)  | 0.42 |
| 12-02 | Gp3 | g.chr5:140202131G>T  | Silent            | PCDHA5  | p.G257G  | protocadherin alpha 5 27 (0.00)              | 44 (0.16)  | 0.42 |
| 12-02 | Gp3 | g.chr5:140588856T>C  | Missense Mutation | PCDHB12 | p.I126T  | protocadherin beta 12 32 (0.00)              | 49 (0.14)  | 0.38 |
| 12-02 | Gp3 | g.chr5:140603352G>A  | Missense Mutation | PCDHB14 | p.R92Q   | protocadherin beta 14 106 (0.01)             | 70 (0.24)  | 0.65 |
| 12-02 | Gp3 | g.chr5:140625702G>C  | Missense Mutation | PCDHB15 | p.G186R  | protocadherin beta 15 35 (0.00)              | 35 (0.23)  | 0.61 |
| 12-02 | Gp3 | g.chr5:140502098C>A  | Missense Mutation | PCDHB4  | p.P173H  | protocadherin beta 4 34 (0.00)               | 56 (0.16)  | 0.43 |
| 12-02 | Gp3 | g.chr5:140773411G>T  | Missense Mutation | PCDHGA8 | p.R344I  | protocadherin gamma sub 42 (0.00)            | 30 (0.30)  | 0.80 |
| 12-02 | Gp3 | g.chr7:82545785C>A   | Silent            | PCLO    | p.V3839V | piccolo presynaptic cytochrome 269 (0.00)    | 198 (0.23) | 0.62 |
| 12-02 | Gp3 | g.chr7:82545810C>G   | Missense Mutation | PCLO    | p.R3831P | piccolo presynaptic cytochrome 253 (0.00)    | 188 (0.21) | 0.57 |
| 12-02 | Gp3 | g.chr20:5096162G>T   | Missense Mutation | PCNA    | p.N213K  | proliferating cell nuclear antigen 50 (0.00) | 32 (0.19)  | 0.50 |
| 12-02 | Gp3 | g.chr1:233314821G>A  | Missense Mutation | PCNXL2  | p.S1056F | pecanex-like 2 (Drosophila) 53 (0.00)        | 33 (0.18)  | 0.48 |
| 12-02 | Gp3 | g.chr1:233397911G>T  | Splice Site       | PCNXL2  | p.S120R  | pecanex-like 2 (Drosophila) 129 (0.00)       | 72 (0.24)  | 0.63 |
| 12-02 | Gp3 | g.chr14:60591120C>A  | Nonsense Mutation | PCNXL4  | p.S744*  | pecanex-like 4 (Drosophila) 109 (0.00)       | 65 (0.28)  | 0.74 |
| 12-02 | Gp3 | g.chr9:78710854G>T   | Nonsense Mutation | PCSK5   | p.G315*  | proprotein convertase subunit 41 (0.00)      | 31 (0.19)  | 0.52 |
| 12-02 | Gp3 | g.chr9:78804597C>G   | Missense Mutation | PCSK5   | p.T854R  | proprotein convertase subunit 65 (0.00)      | 23 (0.39)  | 1.04 |
| 12-02 | Gp3 | g.chr1:144918855C>T  | Missense Mutation | PDE4DIP | p.S581N  | phosphodiesterase 4D isoform 67 (0.00)       | 39 (0.15)  | 0.41 |
| 12-02 | Gp3 | g.chr4:96761510G>A   | Missense Mutation | PDHA2   | p.R70H   | pyruvate dehydrogenase 18 (0.00)             | 53 (0.25)  | 0.65 |
| 12-02 | Gp3 | g.chr2:10927421G>A   | Silent            | PDIA6   | p.I433I  | protein disulfide isomerase 31 (0.00)        | 48 (0.23)  | 0.61 |
| 12-02 | Gp3 | g.chr2:10927442G>T   | Silent            | PDIA6   | p.G426G  | protein disulfide isomerase 32 (0.00)        | 45 (0.20)  | 0.53 |
| 12-02 | Gp3 | g.chr16:70164393G>T  | Silent            | PDPR    | p.V225V  | pyruvate dehydrogenase 15 (0.00)             | 23 (0.35)  | 0.55 |
| 12-02 | Gp3 | g.chr4:39846316C>A   | Missense Mutation | PDS5A   | p.V1170L | PDS5, regulator of cohesin 115 (0.00)        | 126 (0.43) | 1.14 |

|       |     |                      |                   |         |          |                                  |            |            |      |
|-------|-----|----------------------|-------------------|---------|----------|----------------------------------|------------|------------|------|
| 12-02 | Gp3 | g.chr2:61245391C>T   | Missense Mutation | PEX13   | p.P63S   | peroxisomal biogenesis           | 43 (0.00)  | 51 (0.16)  | 0.42 |
| 12-02 | Gp3 | g.chr1:28792271C>G   | Nonsense Mutation | PHACTR4 | p.S126*  | phosphatase and actin re         | 78 (0.00)  | 34 (0.15)  | 0.49 |
| 12-02 | Gp3 | g.chr3:169847213G>A  | Silent            | PHC3    | p.I349I  | polyhomeotic homolog             | 139 (0.01) | 80 (0.50)  | 1.33 |
| 12-02 | Gp3 | g.chr4:129764120C>A  | Missense Mutation | PHF17   | p.T22N   |                                  | 60 (0.00)  | 52 (0.15)  | 0.41 |
| 12-02 | Gp3 | g.chr11:46001518C>A  | Splice Site       | PHF21A  |          | PHD finger protein 21A           | 80 (0.00)  | 26 (0.19)  | 0.51 |
| 12-02 | Gp3 | g.chr6:79655070G>T   | Missense Mutation | PHIP    | p.S1592Y | pleckstrin homology do           | 36 (0.00)  | 29 (0.21)  | 0.55 |
| 12-02 | Gp3 | g.chr18:60393544C>G  | Intron            | PHLPP1  |          | PH domain and leucine            | 51 (0.00)  | 14 (0.50)  | 1.33 |
| 12-02 | Gp3 | g.chr18:60518401C>A  | Intron            | PHLPP1  |          | PH domain and leucine            | 63 (0.00)  | 42 (0.33)  | 0.89 |
| 12-02 | Gp3 | g.chr18:60525124G>A  | Intron            | PHLPP1  |          | PH domain and leucine            | 69 (0.00)  | 38 (0.42)  | 1.12 |
| 12-02 | Gp3 | g.chr18:60564789G>A  | Intron            | PHLPP1  |          | PH domain and leucine            | 69 (0.00)  | 22 (0.27)  | 0.73 |
| 12-02 | Gp3 | g.chr18:60634120C>T  | Intron            | PHLPP1  |          | PH domain and leucine            | 137 (0.01) | 223 (0.16) | 0.43 |
| 12-02 | Gp3 | g.chr16:71698289G>C  | Intron            | PHLPP2  |          | PH domain and leucine            | 71 (0.00)  | 22 (0.36)  | 0.58 |
| 12-02 | Gp3 | g.chr16:71718812G>T  | Intron            | PHLPP2  |          | PH domain and leucine            | 64 (0.00)  | 27 (0.37)  | 0.59 |
| 12-02 | Gp3 | g.chr16:71726554C>G  | Intron            | PHLPP2  |          | PH domain and leucine            | 19 (0.00)  | 29 (0.28)  | 0.44 |
| 12-02 | Gp3 | g.chr16:71736919G>A  | Intron            | PHLPP2  |          | PH domain and leucine            | 40 (0.00)  | 37 (0.51)  | 0.82 |
| 12-02 | Gp3 | g.chr1:114255962T>A  | Missense Mutation | PHTF1   | p.E241V  | putative homeodomain t           | 34 (0.00)  | 23 (0.30)  | 0.81 |
| 12-02 | Gp3 | g.chr7:77538240C>T   | Silent            | PHTF2   | p.P154P  | putative homeodomain t           | 88 (0.01)  | 59 (0.27)  | 0.72 |
| 12-02 | Gp3 | g.chr1:151271482T>C  | Missense Mutation | PI4KB   | p.D591G  | phosphatidylinositol 4-k         | 24 (0.00)  | 16 (0.38)  | 1.30 |
| 12-02 | Gp3 | g.chr18:10671651C>T  | Missense Mutation | PIEZO2  | p.C2711Y | piezo-type mechanosens           | 26 (0.00)  | 40 (0.38)  | 1.00 |
| 12-02 | Gp3 | g.chr9:71478883G>A   | Splice Site       | PIP5K1B | p.S67N   | phosphatidylinositol-4- $\gamma$ | 115 (0.01) | 24 (0.42)  | 1.11 |
| 12-02 | Gp3 | g.chr12:130855828G>A | Missense Mutation | PIWIL1  | p.R810H  | piwi-like RNA-mediate            | 59 (0.00)  | 43 (0.37)  | 0.59 |
| 12-02 | Gp3 | g.chr5:108672946C>T  | Missense Mutation | PJA2    | p.A705T  | praja ring finger 2, E3 u        | 25 (0.00)  | 15 (0.33)  | 0.89 |
| 12-02 | Gp3 | g.chr16:71967302G>A  | RNA               | PKD1L3  |          | polycystic kidney diseas         | 32 (0.00)  | 26 (0.54)  | 0.86 |
| 12-02 | Gp3 | g.chr16:71977987G>T  | RNA               | PKD1L3  |          | polycystic kidney diseas         | 70 (0.01)  | 20 (0.40)  | 0.64 |
| 12-02 | Gp3 | g.chr4:88957446G>T   | Missense Mutation | PKD2    | p.V262L  | polycystic kidney diseas         | 34 (0.00)  | 38 (0.61)  | 1.61 |
| 12-02 | Gp3 | g.chr8:110437349C>T  | Silent            | PKHD1L1 | p.Y911Y  | polycystic kidney and h          | 55 (0.00)  | 12 (0.42)  | 1.11 |
| 12-02 | Gp3 | g.chr8:110457011A>G  | Missense Mutation | PKHD1L1 | p.Y1638C | polycystic kidney and h          | 140 (0.00) | 28 (0.43)  | 1.14 |
| 12-02 | Gp3 | g.chr8:110476739G>T  | Missense Mutation | PKHD1L1 | p.A2560S | polycystic kidney and h          | 78 (0.00)  | 58 (0.60)  | 1.61 |
| 12-02 | Gp3 | g.chr15:72502132C>G  | Missense Mutation | PKM     | p.M149I  | pyruvate kinase, muscle          | 55 (0.00)  | 44 (0.27)  | 0.73 |
| 12-02 | Gp3 | g.chr9:26928113C>A   | Nonsense Mutation | PLAA    | p.E184*  | phospholipase A2-activ           | 47 (0.02)  | 33 (0.18)  | 0.48 |
| 12-02 | Gp3 | g.chr20:9388599G>T   | Missense Mutation | PLCB4   | p.M549I  | phospholipase C, beta 4          | 43 (0.02)  | 21 (0.24)  | 0.63 |
| 12-02 | Gp3 | g.chr3:155267631C>T  | Missense Mutation | PLCH1   | p.G424E  | phospholipase C, eta 1           | 39 (0.00)  | 16 (0.31)  | 0.83 |
| 12-02 | Gp3 | g.chr17:4718784G>T   | Missense Mutation | PLD2    | p.R396L  | phospholipase D2                 | 24 (0.00)  | 26 (0.31)  | 0.56 |
| 12-02 | Gp3 | g.chr14:68052725G>A  | Missense Mutation | PLEKHH1 | p.D1282N | pleckstrin homology do           | 90 (0.00)  | 79 (0.33)  | 0.88 |
| 12-02 | Gp3 | g.chr15:65140865G>T  | Missense Mutation | PLEKHO2 | p.S29I   | pleckstrin homology do           | 52 (0.02)  | 54 (0.17)  | 0.44 |

|       |     |                      |                   |          |          |                          |            |            |      |
|-------|-----|----------------------|-------------------|----------|----------|--------------------------|------------|------------|------|
| 12-02 | Gp3 | g.chr6:161152119C>A  | Silent            | PLG      | p.A431A  | plasminogen              | 82 (0.00)  | 19 (0.37)  | 0.98 |
| 12-02 | Gp3 | g.chr3:145839001T>A  | Missense Mutation | PLOD2    | p.D79V   | procollagen-lysine, 2-ox | 102 (0.00) | 34 (0.21)  | 0.55 |
| 12-02 | Gp3 | g.chr3:145914465C>T  | Missense Mutation | PLSCR4   | p.R247H  | phospholipid scramblase  | 59 (0.00)  | 17 (0.41)  | 1.10 |
| 12-02 | Gp3 | g.chr1:208201461C>A  | Missense Mutation | PLXNA2   | p.D1828Y | plexin A2                | 22 (0.00)  | 22 (0.23)  | 0.61 |
| 12-02 | Gp3 | g.chr15:89870229G>T  | Missense Mutation | POLG     | p.A500D  | polymerase (DNA direc    | 36 (0.00)  | 87 (0.22)  | 0.58 |
| 12-02 | Gp3 | g.chr2:86292400T>C   | Silent            | POLR1A   | p.K685K  | polymerase (RNA) I pol   | 20 (0.00)  | 15 (0.47)  | 1.24 |
| 12-02 | Gp3 | g.chr10:79742029A>G  | Silent            | POLR3A   | p.I1214I | polymerase (RNA) III     | 132 (0.00) | 21 (0.29)  | 0.76 |
| 12-02 | Gp3 | g.chr7:72418911C>T   | Missense Mutation | POM121   | p.P968S  | POM121 transmembran      | 25 (0.00)  | 172 (0.21) | 0.56 |
| 12-02 | Gp3 | g.chr6:27278850G>A   | Missense Mutation | POM121L2 | p.T367I  | POM121 transmembran      | 47 (0.00)  | 56 (0.18)  | 0.61 |
| 12-02 | Gp3 | g.chr7:124503538C>G  | Missense Mutation | POT1     | p.V138L  | protection of telomeres  | 69 (0.00)  | 32 (0.16)  | 0.42 |
| 12-02 | Gp3 | g.chr7:124503612G>A  | Missense Mutation | POT1     | p.P113L  | protection of telomeres  | 95 (0.00)  | 40 (0.20)  | 0.53 |
| 12-02 | Gp3 | g.chr11:70178095G>T  | Missense Mutation | PPFIA1   | p.E369D  | protein tyrosine phosph  | 76 (0.00)  | 92 (0.11)  | 0.38 |
| 12-02 | Gp3 | g.chr11:70202283G>A  | Silent            | PPFIA1   | p.T835T  | protein tyrosine phosph  | 97 (0.00)  | 46 (0.17)  | 0.61 |
| 12-02 | Gp3 | g.chr2:170493509G>A  | Missense Mutation | PPIG     | p.D581N  | peptidylprolyl isomer    | 57 (0.00)  | 21 (0.48)  | 0.74 |
| 12-02 | Gp3 | g.chr1:113253214G>T  | Missense Mutation | PPM1J    | p.T413K  | protein phosphatase, M   | 39 (0.00)  | 30 (0.23)  | 0.62 |
| 12-02 | Gp3 | g.chr14:102229246C>A | Nonsense Mutation | PPP2R5C  | p.S11*   | protein phosphatase 2,   | 15 (0.00)  | 16 (0.31)  | 0.83 |
| 12-02 | Gp3 | g.chr6:105800850C>T  | Missense Mutation | PREP     | p.A274T  | prolyl endopeptidase     | 31 (0.00)  | 11 (0.73)  | 1.94 |
| 12-02 | Gp3 | g.chr12:49398769C>G  | Missense Mutation | PRKAG1   | p.V130L  | protein kinase, AMP-ac   | 143 (0.00) | 33 (0.18)  | 0.48 |
| 12-02 | Gp3 | g.chr3:53223971C>A   | Missense Mutation | PRKCD    | p.T609N  | protein kinase C, delta  | 34 (0.00)  | 83 (0.36)  | 0.96 |
| 12-02 | Gp3 | g.chr10:6498699C>A   | Missense Mutation | PRKCC    | p.E528D  | protein kinase C, theta  | 30 (0.00)  | 32 (0.22)  | 0.58 |
| 12-02 | Gp3 | g.chr14:23393293G>A  | Silent            | PRMT5    | p.V433V  | protein arginine methyl  | 42 (0.00)  | 39 (0.23)  | 0.62 |
| 12-02 | Gp3 | g.chr14:23393523C>G  | Silent            | PRMT5    | p.R385R  | protein arginine methyl  | 51 (0.00)  | 47 (0.30)  | 0.79 |
| 12-02 | Gp3 | g.chr14:75329308G>T  | Silent            | PROX2    | p.P410P  | prospero homeobox 2      | 23 (0.00)  | 31 (0.19)  | 0.52 |
| 12-02 | Gp3 | g.chr9:116053081C>T  | Missense Mutation | PRPF4    | p.P417L  | pre-mRNA processing f    | 69 (0.00)  | 40 (0.20)  | 0.53 |
| 12-02 | Gp3 | g.chr2:153526894T>C  | Splice Site       | PRPF40A  | p.E494G  | PRP40 pre-mRNA proc      | 22 (0.00)  | 10 (0.50)  | 0.92 |
| 12-02 | Gp3 | g.chr6:4056660C>A    | Missense Mutation | PRPF4B   | p.P858T  | pre-mRNA processing f    | 46 (0.00)  | 25 (0.24)  | 0.64 |
| 12-02 | Gp3 | g.chr1:171553315C>G  | Missense Mutation | PRRC2C   | p.H2542D | proline-rich coiled-coil | 176 (0.00) | 18 (0.44)  | 1.19 |
| 12-02 | Gp3 | g.chr1:171556814G>T  | Nonsense Mutation | PRRC2C   | p.G2664* | proline-rich coiled-coil | 183 (0.00) | 15 (0.40)  | 1.07 |
| 12-02 | Gp3 | g.chr1:171560972G>A  | Missense Mutation | PRRC2C   | p.E2814K | proline-rich coiled-coil | 142 (0.00) | 11 (0.55)  | 1.45 |
| 12-02 | Gp3 | g.chr7:127998779G>C  | Missense Mutation | PRRT4    | p.P278R  | proline-rich transmembr  | 15 (0.00)  | 36 (0.22)  | 0.59 |
| 12-02 | Gp3 | g.chr9:79318319G>A   | Missense Mutation | PRUNE2   | p.P2737L | prune homolog 2 (Dros    | 81 (0.00)  | 50 (0.40)  | 1.07 |
| 12-02 | Gp3 | g.chr8:18729517C>T   | Missense Mutation | PSD3     | p.R286Q  | pleckstrin and Sec7 don  | 26 (0.00)  | 18 (0.28)  | 0.57 |
| 12-02 | Gp3 | g.chr3:184021134G>A  | Missense Mutation | PSMD2    | p.D366N  | proteasome (prosome,     | 18 (0.00)  | 18 (0.78)  | 2.07 |
| 12-02 | Gp3 | g.chr17:40990984G>A  | Missense Mutation | PSME3    | p.R105K  | proteasome (prosome,     | 68 (0.00)  | 59 (0.14)  | 0.49 |
| 12-02 | Gp3 | g.chr18:43570708G>T  | Missense Mutation | PSTPIP2  | p.P312Q  | proline-serine-threonine | 53 (0.00)  | 43 (0.28)  | 0.74 |

|       |     |                      |                   |         |          |                           |            |            |      |
|-------|-----|----------------------|-------------------|---------|----------|---------------------------|------------|------------|------|
| 12-02 | Gp3 | g.chr9:72338414C>A   | Nonsense Mutation | PTAR1   | p.E259*  | protein prenyltransferase | 28 (0.00)  | 18 (0.28)  | 0.74 |
| 12-02 | Gp3 | g.chr9:114994438G>T  | Missense Mutation | PTBP3   | p.P321T  | polypyrimidine tract bin  | 37 (0.00)  | 29 (0.31)  | 0.83 |
| 12-02 | Gp3 | g.chr10:89675566C>T  | Intron            | PTEN    |          | phosphatase and tensin l  | 143 (0.01) | 29 (0.21)  | 0.55 |
| 12-02 | Gp3 | g.chr10:89700596C>T  | Intron            | PTEN    |          | phosphatase and tensin l  | 122 (0.01) | 33 (0.39)  | 1.05 |
| 12-02 | Gp3 | g.chr1:32374508C>T   | Missense Mutation | PTP4A2  | p.R150Q  | protein tyrosine phosphat | 114 (0.00) | 49 (0.22)  | 0.60 |
| 12-02 | Gp3 | g.chr7:77172424C>A   | Intron            | PTPN12  |          | protein tyrosine phosphat | 143 (0.00) | 46 (0.15)  | 0.41 |
| 12-02 | Gp3 | g.chr7:77206842A>G   | Intron            | PTPN12  |          | protein tyrosine phosphat | 69 (0.00)  | 40 (0.60)  | 1.60 |
| 12-02 | Gp3 | g.chr7:77239312C>A   | Intron            | PTPN12  |          | protein tyrosine phosphat | 66 (0.02)  | 140 (0.15) | 0.40 |
| 12-02 | Gp3 | g.chr7:77260708G>T   | Intron            | PTPN12  |          | protein tyrosine phosphat | 100 (0.00) | 40 (0.28)  | 0.73 |
| 12-02 | Gp3 | g.chr9:112172311C>A  | Missense Mutation | PTPN3   | p.D516Y  | protein tyrosine phosphat | 18 (0.00)  | 25 (0.36)  | 0.96 |
| 12-02 | Gp3 | g.chr12:70949895G>T  | Missense Mutation | PTPRB   | p.P1495H | protein tyrosine phosphat | 124 (0.00) | 63 (0.16)  | 0.42 |
| 12-02 | Gp3 | g.chr12:70953334C>G  | Silent            | PTPRB   | p.G1413G | protein tyrosine phosphat | 40 (0.00)  | 35 (0.26)  | 0.69 |
| 12-02 | Gp3 | g.chr11:48146547C>G  | Missense Mutation | PTPRJ   | p.A301G  | protein tyrosine phosphat | 17 (0.00)  | 37 (0.19)  | 0.50 |
| 12-02 | Gp3 | g.chr2:136481625C>T  | Silent            | R3HDM1  | p.P966P  | R3H domain containing     | 32 (0.00)  | 23 (0.26)  | 0.48 |
| 12-02 | Gp3 | g.chr15:66170279C>T  | Missense Mutation | RAB11A  | p.A139V  | RAB11A, member RAS        | 59 (0.00)  | 73 (0.16)  | 0.44 |
| 12-02 | Gp3 | g.chr12:1042175G>T   | Missense Mutation | RAD52   | p.A17D   | RAD52 homolog (S. cere    | 49 (0.00)  | 75 (0.17)  | 0.46 |
| 12-02 | Gp3 | g.chr20:55949751G>A  | Missense Mutation | RAE1    | p.R305K  | ribonucleic acid export   | 66 (0.00)  | 82 (0.30)  | 0.81 |
| 12-02 | Gp3 | g.chr11:36596172C>A  | Missense Mutation | RAG1    | p.L440M  | recombination activating  | 17 (0.00)  | 47 (0.17)  | 0.45 |
| 12-02 | Gp3 | g.chr9:129937044C>G  | Missense Mutation | RALGPS1 | p.S298C  | Ral GEF with PH domain    | 28 (0.00)  | 36 (0.19)  | 0.65 |
| 12-02 | Gp3 | g.chr2:109368009C>T  | Missense Mutation | RANBP2  | p.T494I  | RAN binding protein 2     | 132 (0.00) | 21 (0.62)  | 1.08 |
| 12-02 | Gp3 | g.chr2:109382892C>A  | Missense Mutation | RANBP2  | p.P1966H | RAN binding protein 2     | 100 (0.01) | 93 (0.44)  | 0.77 |
| 12-02 | Gp3 | g.chr2:109382893C>A  | Silent            | RANBP2  | p.P1966P | RAN binding protein 2     | 99 (0.01)  | 94 (0.45)  | 0.78 |
| 12-02 | Gp3 | g.chr3:25502708C>A   | Missense Mutation | RARB    | p.S61Y   | retinoic acid receptor, b | 62 (0.00)  | 29 (0.38)  | 1.01 |
| 12-02 | Gp3 | g.chr1:178414707G>A  | Missense Mutation | RASAL2  | p.V513I  | RAS protein activator li  | 21 (0.00)  | 31 (0.32)  | 0.86 |
| 12-02 | Gp3 | g.chr15:38805029C>A  | Silent            | RASGRP1 | p.P268P  | RAS guanyl releasing pr   | 44 (0.00)  | 43 (0.26)  | 0.68 |
| 12-02 | Gp3 | g.chr2:33780625A>G   | Missense Mutation | RASGRP3 | p.K524E  | RAS guanyl releasing pr   | 32 (0.00)  | 39 (0.28)  | 0.75 |
| 12-02 | Gp3 | g.chr13:48884204G>A  | Intron            | RB1     |          | retinoblastoma 1          | 118 (0.00) | 50 (0.48)  | 1.28 |
| 12-02 | Gp3 | g.chr13:48907768G>A  | Intron            | RB1     |          | retinoblastoma 1          | 101 (0.00) | 57 (0.61)  | 1.64 |
| 12-02 | Gp3 | g.chr13:48907819A>T  | Intron            | RB1     |          | retinoblastoma 1          | 119 (0.00) | 55 (0.45)  | 1.21 |
| 12-02 | Gp3 | g.chr13:48914203C>A  | Intron            | RB1     |          | retinoblastoma 1          | 28 (0.00)  | 21 (0.43)  | 1.14 |
| 12-02 | Gp3 | g.chr13:48952663C>A  | Intron            | RB1     |          | retinoblastoma 1          | 61 (0.00)  | 15 (0.33)  | 0.89 |
| 12-02 | Gp3 | g.chr13:49020488T>A  | Intron            | RB1     |          | retinoblastoma 1          | 21 (0.00)  | 40 (0.42)  | 1.13 |
| 12-02 | Gp3 | g.chr13:49023699G>A  | Intron            | RB1     |          | retinoblastoma 1          | 80 (0.00)  | 36 (0.25)  | 0.67 |
| 12-02 | Gp3 | g.chr13:49032753A>G  | Intron            | RB1     |          | retinoblastoma 1          | 59 (0.00)  | 73 (0.16)  | 0.44 |
| 12-02 | Gp3 | g.chr10:112541497G>A | Missense Mutation | RBM20   | p.G377D  | RNA binding motif prot    | 22 (0.00)  | 38 (0.24)  | 0.63 |

|       |     |                     |                   |               |          |                                              |            |      |
|-------|-----|---------------------|-------------------|---------------|----------|----------------------------------------------|------------|------|
| 12-02 | Gp3 | g.chr7:127961425C>T | Missense Mutation | RBM28         | p.R486Q  | RNA binding motif prot 35 (0.00)             | 33 (0.39)  | 1.05 |
| 12-02 | Gp3 | g.chr1:89449143G>A  | Missense Mutation | RBMXL1        | p.P123S  | RNA binding motif prot 68 (0.00)             | 16 (0.38)  | 1.00 |
| 12-02 | Gp3 | g.chr2:61144116C>A  | Missense Mutation | REL           | p.L167I  | v-rel avian reticuloendothelial 48 (0.00)    | 35 (0.31)  | 0.84 |
| 12-02 | Gp3 | g.chr11:65426188C>A | Splice Site       | RELA          |          | v-rel avian reticuloendothelial 17 (0.00)    | 79 (0.15)  | 0.53 |
| 12-02 | Gp3 | g.chr4:37651083G>A  | Missense Mutation | RELL1         | p.T43M   | RELT-like 1 40 (0.00)                        | 48 (0.69)  | 1.83 |
| 12-02 | Gp3 | g.chr6:111701373T>C | Silent            | REV3L         | p.E422E  | REV3-like, polymerase 100 (0.00)             | 41 (0.15)  | 0.39 |
| 12-02 | Gp3 | g.chr6:111701410G>T | Missense Mutation | REV3L         | p.P410H  | REV3-like, polymerase 42 (0.00)              | 40 (0.15)  | 0.40 |
| 12-02 | Gp3 | g.chr9:136279840C>T | Missense Mutation | REXO4         | p.D173N  | REX4, RNA exonuclease 28 (0.00)              | 16 (0.31)  | 0.83 |
| 12-02 | Gp3 | g.chr3:186518960A>G | Silent            | RFC4          | p.V52V   | replication factor C (actin) 23 (0.00)       | 24 (0.50)  | 1.33 |
| 12-02 | Gp3 | g.chr22:32754341C>A | Missense Mutation | RFPL3         | p.Q66K   | ret finger protein-like 3 52 (0.00)          | 30 (0.17)  | 0.44 |
| 12-02 | Gp3 | g.chr19:56274496C>T | Silent            | RFPL4A        | p.I273I  | ret finger protein-like 4 29 (0.00)          | 31 (0.19)  | 0.52 |
| 12-02 | Gp3 | g.chr2:198540155C>A | Missense Mutation | RFTN2         | p.D10Y   | raftlin family member 2 108 (0.00)           | 105 (0.17) | 0.46 |
| 12-02 | Gp3 | g.chr5:38982138G>A  | Splice Site       | RICTOR        | p.A195V  | RPTOR independent co-receptor 18 (0.00)      | 15 (0.87)  | 2.31 |
| 12-02 | Gp3 | g.chr8:104948876C>T | Missense Mutation | RIMS2         | p.R603W  | regulating synaptic membrane 21 (0.00)       | 23 (0.39)  | 1.04 |
| 12-02 | Gp3 | g.chr2:7154590G>A   | Silent            | RNF144A       | p.L47L   | ring finger protein 144A 29 (0.00)           | 24 (0.21)  | 0.56 |
| 12-02 | Gp3 | g.chr9:104316328C>A | Missense Mutation | RNF20         | p.P654T  | ring finger protein 20, E37 37 (0.00)        | 19 (0.32)  | 0.84 |
| 12-02 | Gp3 | g.chr13:79190110G>T | Missense Mutation | RNF219        | p.L596I  | ring finger protein 219 55 (0.00)            | 40 (0.38)  | 1.00 |
| 12-02 | Gp3 | g.chr17:58040337T>C | Missense Mutation | RNFT1         | p.E122G  | ring finger protein, transmembrane 36 (0.00) | 30 (0.17)  | 0.56 |
| 12-02 | Gp3 | g.chr3:78656014C>T  | Missense Mutation | ROBO1         | p.R1538K | roundabout, axon guidance 164 (0.00)         | 105 (0.43) | 1.45 |
| 12-02 | Gp3 | g.chr15:78217424C>A | RNA               | RP11-114H24.2 |          | 34 (0.00)                                    | 23 (0.22)  | 0.58 |
| 12-02 | Gp3 | g.chr5:177059237G>T | RNA               | RP11-1277A3.2 |          | 23 (0.00)                                    | 45 (0.16)  | 0.41 |
| 12-02 | Gp3 | g.chr15:76074939G>T | RNA               | RP11-24M17.5  |          | 21 (0.00)                                    | 34 (0.15)  | 0.39 |
| 12-02 | Gp3 | g.chr3:139213532G>T | RNA               | RP11-319G6.1  |          | 31 (0.00)                                    | 22 (0.36)  | 0.97 |
| 12-02 | Gp3 | g.chr10:51822502C>A | RNA               | RP11-324H6.5  |          | 34 (0.00)                                    | 83 (0.28)  | 0.74 |
| 12-02 | Gp3 | g.chr3:97957312C>A  | lincRNA           | RP11-325B23.2 |          | 62 (0.02)                                    | 33 (0.24)  | 0.65 |
| 12-02 | Gp3 | g.chr3:97957351C>A  | lincRNA           | RP11-325B23.2 |          | 78 (0.00)                                    | 34 (0.26)  | 0.71 |
| 12-02 | Gp3 | g.chr3:9390341G>T   | RNA               | RP11-380O24.1 |          | 25 (0.00)                                    | 36 (0.22)  | 0.59 |
| 12-02 | Gp3 | g.chr9:84547687C>G  | lincRNA           | RP11-383M4.6  |          | 33 (0.00)                                    | 18 (0.72)  | 1.93 |
| 12-02 | Gp3 | g.chr1:159320979G>A | RNA               | RP11-550P17.5 |          | 69 (0.00)                                    | 23 (0.74)  | 1.97 |
| 12-02 | Gp3 | g.chr10:89402608A>T | RNA               | RP11-57C13.3  |          | 64 (0.00)                                    | 52 (0.23)  | 0.62 |
| 12-02 | Gp3 | g.chr4:68312079G>A  | lincRNA           | RP11-584P21.2 |          | 24 (0.00)                                    | 40 (0.20)  | 0.53 |
| 12-02 | Gp3 | g.chr14:20151707G>A | lincRNA           | RP11-597A11.2 |          | 79 (0.00)                                    | 22 (0.23)  | 0.61 |
| 12-02 | Gp3 | g.chr17:43626627C>A | lincRNA           | RP11-798G7.6  |          | 41 (0.00)                                    | 30 (0.27)  | 0.86 |
| 12-02 | Gp3 | g.chr18:11913879C>G | lincRNA           | RP11-820I16.1 |          | 19 (0.00)                                    | 29 (0.48)  | 1.29 |
| 12-02 | Gp3 | g.chr11:94647279T>A | RNA               | RP11-856F16.2 |          | 28 (0.00)                                    | 21 (0.24)  | 0.63 |

|       |     |                     |                   |             |          |                                |              |           |      |
|-------|-----|---------------------|-------------------|-------------|----------|--------------------------------|--------------|-----------|------|
| 12-02 | Gp3 | g.chr20:26173969C>A | lincRNA           | RP3-410C9.2 |          |                                | 53 (0.00)    | 24 (0.25) | 0.67 |
| 12-02 | Gp3 | g.chr14:21788274C>A | Missense Mutation | RPGRIP1     | p.P469T  | retinitis pigmentosa           | GTI36 (0.00) | 44 (0.16) | 0.42 |
| 12-02 | Gp3 | g.chr14:21793132C>G | Silent            | RPGRIP1     | p.A706A  | retinitis pigmentosa           | GTI29 (0.00) | 22 (0.23) | 0.61 |
| 12-02 | Gp3 | g.chr14:21796675G>T | Missense Mutation | RPGRIP1     | p.E996D  | retinitis pigmentosa           | GTI39 (0.00) | 27 (0.33) | 0.89 |
| 12-02 | Gp3 | g.chr16:53698861C>A | Missense Mutation | RPGRIP1L    | p.Q388H  | RPGRIP1-like                   | 50 (0.00)    | 37 (0.43) | 0.56 |
| 12-02 | Gp3 | g.chrX:153628858G>C | Missense Mutation | RPL10       | p.R128T  | ribosomal protein L10          | 29 (0.00)    | 31 (0.29) | 0.48 |
| 12-02 | Gp3 | g.chr1:93299218G>C  | Splice Site       | RPL5        |          | ribosomal protein L5           | 79 (0.00)    | 27 (0.59) | 1.58 |
| 12-02 | Gp3 | g.chr17:57990151G>T | Missense Mutation | RPS6KB1     | p.G100W  | ribosomal protein S6 kir67     | 67 (0.00)    | 65 (0.35) | 1.18 |
| 12-02 | Gp3 | g.chr17:78796977C>T | Missense Mutation | RPTOR       | p.P364S  | regulatory associated protein  | 18 (0.00)    | 51 (0.12) | 0.43 |
| 12-02 | Gp3 | g.chr6:7187672G>A   | Silent            | RREB1       | p.T59T   | ras responsive element binding | 42 (0.00)    | 30 (0.27) | 0.71 |
| 12-02 | Gp3 | g.chr2:74654385C>A  | Missense Mutation | RTKN        | p.C374F  | rhotekin                       | 58 (0.02)    | 28 (0.18) | 0.48 |
| 12-02 | Gp3 | g.chr2:55253061T>C  | Missense Mutation | RTN4        | p.E725G  | reticulon 4                    | 45 (0.00)    | 30 (0.23) | 0.62 |
| 12-02 | Gp3 | g.chr3:72451231G>A  | Intron            | RYBP        |          | RING1 and YY1 binding site     | 50 (0.00)    | 23 (0.48) | 1.28 |
| 12-02 | Gp3 | g.chr3:72456786C>A  | Intron            | RYBP        |          | RING1 and YY1 binding site     | 68 (0.00)    | 21 (0.29) | 0.76 |
| 12-02 | Gp3 | g.chr3:72460893C>T  | Intron            | RYBP        |          | RING1 and YY1 binding site     | 107 (0.00)   | 26 (0.19) | 0.51 |
| 12-02 | Gp3 | g.chr3:72463462C>A  | Intron            | RYBP        |          | RING1 and YY1 binding site     | 51 (0.00)    | 61 (0.15) | 0.39 |
| 12-02 | Gp3 | g.chr3:72476605C>A  | Intron            | RYBP        |          | RING1 and YY1 binding site     | 22 (0.00)    | 35 (0.14) | 0.38 |
| 12-02 | Gp3 | g.chr1:237955549C>A | Missense Mutation | RYR2        | p.P4570T | ryanodine receptor 2 (ca 102)  | 102 (0.00)   | 83 (0.17) | 0.45 |
| 12-02 | Gp3 | g.chr1:237993849G>A | Missense Mutation | RYR2        | p.G4892E | ryanodine receptor 2 (ca 73)   | 73 (0.00)    | 11 (0.64) | 1.70 |
| 12-02 | Gp3 | g.chr13:23904861G>T | Missense Mutation | SACS        | p.S4385Y | sacsin molecular chaperone     | 18 (0.00)    | 23 (0.30) | 0.81 |
| 12-02 | Gp3 | g.chr7:92764166C>G  | Silent            | SAMD9L      | p.L373L  | sterile alpha motif domain     | 131 (0.00)   | 92 (0.34) | 0.90 |
| 12-02 | Gp3 | g.chr6:148854045C>A | Silent            | SASH1       | p.A559A  | SAM and SH3 domain containing  | 17 (0.00)    | 22 (0.27) | 0.73 |
| 12-02 | Gp3 | g.chr3:18393591G>T  | Missense Mutation | SATB1       | p.L558I  | SATB homeobox 1                | 26 (0.00)    | 12 (0.42) | 1.11 |
| 12-02 | Gp3 | g.chr11:9864315G>C  | Missense Mutation | SBF2        | p.T1038S | SET binding factor 2           | 55 (0.00)    | 27 (0.26) | 0.69 |
| 12-02 | Gp3 | g.chr12:46316847G>T | Missense Mutation | SCAF11      | p.Q1333K | SR-related CTD-associated      | 136 (0.00)   | 64 (0.28) | 0.75 |
| 12-02 | Gp3 | g.chr6:155114050C>A | Missense Mutation | SCAF8       | p.P139T  | SR-related CTD-associated      | 46 (0.00)    | 21 (0.24) | 0.63 |
| 12-02 | Gp3 | g.chr2:166848812G>A | Missense Mutation | SCN1A       | p.T1630M | sodium channel, voltage-gated  | 64 (0.00)    | 53 (0.58) | 0.91 |
| 12-02 | Gp3 | g.chr2:165971986G>A | Missense Mutation | SCN3A       | p.P1165S | sodium channel, voltage-gated  | 49 (0.00)    | 16 (0.50) | 0.78 |
| 12-02 | Gp3 | g.chr12:52082631C>A | Missense Mutation | SCN8A       | p.P235Q  | sodium channel, voltage-gated  | 81 (0.00)    | 42 (0.29) | 0.76 |
| 12-02 | Gp3 | g.chr12:52159756G>T | Missense Mutation | SCN8A       | p.G949V  | sodium channel, voltage-gated  | 100 (0.00)   | 71 (0.23) | 0.60 |
| 12-02 | Gp3 | g.chr6:35210032C>A  | Missense Mutation | SCUBE3      | p.A490D  | signal peptide, CUB domain     | 16 (0.00)    | 59 (0.17) | 0.45 |
| 12-02 | Gp3 | g.chr1:169833544C>G | Missense Mutation | SCYL3       | p.K307N  | SCY1-like 3 (S. cerevisiae)    | 119 (0.00)   | 35 (0.37) | 0.99 |
| 12-02 | Gp3 | g.chr17:75196707C>A | Missense Mutation | SEC14L1     | p.Q321K  | SEC14-like 1 (S. cerevisiae)   | 106 (0.00)   | 92 (0.12) | 0.43 |
| 12-02 | Gp3 | g.chr1:169586609G>T | Nonsense Mutation | SELP        | p.Y46*   | selectin P (granule membrane)  | 72 (0.00)    | 22 (0.32) | 0.85 |
| 12-02 | Gp3 | g.chr9:91994412G>T  | Missense Mutation | SEMA4D      | p.P599H  | sema domain, immunoglobulin    | 50 (0.00)    | 35 (0.14) | 0.38 |

|       |     |                      |                   |          |          |                            |            |            |      |
|-------|-----|----------------------|-------------------|----------|----------|----------------------------|------------|------------|------|
| 12-02 | Gp3 | g.chr5:115818270T>C  | Splice Site       | SEMA6A   | p.I322V  | sema domain, transmem      | 39 (0.00)  | 31 (0.19)  | 0.52 |
| 12-02 | Gp3 | g.chr3:101136460G>A  | Silent            | SENP7    | p.R153R  | SUMO1/sentrin specific     | 36 (0.00)  | 27 (0.26)  | 0.69 |
| 12-02 | Gp3 | g.chr14:94942472C>A  | Splice Site       | SERPINA9 |          | serpin peptidase inhibitc  | 46 (0.00)  | 50 (0.16)  | 0.43 |
| 12-02 | Gp3 | g.chr6:2890693C>A    | Missense Mutation | SERPINB9 | p.D279Y  | serpin peptidase inhibitc  | 71 (0.00)  | 74 (0.20)  | 0.54 |
| 12-02 | Gp3 | g.chr11:94911882G>A  | Nonsense Mutation | SESN3    | p.R211*  | sestrin 3                  | 21 (0.00)  | 25 (0.20)  | 0.53 |
| 12-02 | Gp3 | g.chr3:9482249G>C    | Missense Mutation | SETD5    | p.S226T  | SET domain containing      | 33 (0.00)  | 21 (0.38)  | 1.02 |
| 12-02 | Gp3 | g.chr3:9515086G>T    | Missense Mutation | SETD5    | p.R1121L | SET domain containing      | 45 (0.00)  | 18 (0.33)  | 0.89 |
| 12-02 | Gp3 | g.chr22:26707870C>A  | Silent            | SEZ6L    | p.I606I  | seizure related 6 homolc   | 19 (0.00)  | 48 (0.65)  | 1.72 |
| 12-02 | Gp3 | g.chr2:198267383C>T  | Nonsense Mutation | SF3B1    | p.W658*  | splicing factor 3b, subur  | 42 (0.00)  | 22 (0.32)  | 0.85 |
| 12-02 | Gp3 | g.chr8:13947965C>A   | Missense Mutation | SGCZ     | p.C309F  | sarcoglycan, zeta          | 46 (0.00)  | 49 (0.43)  | 1.14 |
| 12-02 | Gp3 | g.chr8:67743543C>A   | Silent            | SGK3     | p.G174G  | serum/glucocorticoid re    | 47 (0.00)  | 19 (0.26)  | 0.70 |
| 12-02 | Gp3 | g.chr8:19218765G>T   | Nonsense Mutation | SH2D4A   | p.E171*  | SH2 domain containing      | 30 (0.00)  | 12 (0.42)  | 0.86 |
| 12-02 | Gp3 | g.chr3:72850756A>T   | Intron            | SHQ1     |          | SHQ1, H/ACA ribonucl       | 55 (0.00)  | 26 (0.23)  | 0.62 |
| 12-02 | Gp3 | g.chr3:72855317C>T   | Intron            | SHQ1     |          | SHQ1, H/ACA ribonucl       | 58 (0.00)  | 22 (0.36)  | 0.97 |
| 12-02 | Gp3 | g.chr3:72855320G>T   | Intron            | SHQ1     |          | SHQ1, H/ACA ribonucl       | 57 (0.00)  | 21 (0.38)  | 1.02 |
| 12-02 | Gp3 | g.chr3:72886137C>T   | Intron            | SHQ1     |          | SHQ1, H/ACA ribonucl       | 109 (0.00) | 41 (0.22)  | 0.59 |
| 12-02 | Gp3 | g.chr19:52034653C>G  | Missense Mutation | SIGLEC6  | p.G63A   | sialic acid binding Ig-lik | 21 (0.00)  | 121 (0.18) | 0.69 |
| 12-02 | Gp3 | g.chr17:46257462C>T  | Silent            | SKAP1    | p.E260E  | src kinase associated ph   | 21 (0.00)  | 40 (0.23)  | 0.72 |
| 12-02 | Gp3 | g.chr5:127466891T>A  | Nonsense Mutation | SLC12A2  | p.L394*  | solute carrier family 12   | 33 (0.00)  | 24 (0.25)  | 0.67 |
| 12-02 | Gp3 | g.chr6:133108662C>A  | Missense Mutation | SLC18B1  | p.V138L  | solute carrier family 18,  | 51 (0.00)  | 18 (0.28)  | 0.74 |
| 12-02 | Gp3 | g.chr2:228564171C>T  | Missense Mutation | SLC19A3  | p.G87D   | solute carrier family 19   | 29 (0.00)  | 32 (0.25)  | 0.67 |
| 12-02 | Gp3 | g.chr1:9640219C>T    | Silent            | SLC25A33 | p.S230S  | solute carrier family 25   | 36 (0.00)  | 30 (0.23)  | 0.78 |
| 12-02 | Gp3 | g.chr1:75805306C>T   | Missense Mutation | SLC44A5  | p.R21K   | solute carrier family 44,  | 104 (0.00) | 80 (0.25)  | 0.67 |
| 12-02 | Gp3 | g.chr13:29291966G>A  | Missense Mutation | SLC46A3  | p.P57L   | solute carrier family 46,  | 23 (0.00)  | 25 (0.20)  | 0.53 |
| 12-02 | Gp3 | g.chr22:32477903T>A  | Missense Mutation | SLC5A1   | p.N176K  | solute carrier family 5    | ε68 (0.00) | 73 (0.21)  | 0.55 |
| 12-02 | Gp3 | g.chr22:32498086G>A  | Silent            | SLC5A1   | p.G509G  | solute carrier family 5    | ε25 (0.00) | 23 (0.22)  | 0.58 |
| 12-02 | Gp3 | g.chr21:35468322C>G  | Nonsense Mutation | SLC5A3   | p.Y275*  | solute carrier family 5    | ε82 (0.00) | 51 (0.20)  | 0.52 |
| 12-02 | Gp3 | g.chr8:87242406G>T   | Missense Mutation | SLC7A13  | p.S34Y   | solute carrier family 7    | ε24 (0.00) | 56 (0.21)  | 0.57 |
| 12-02 | Gp3 | g.chr16:67291338G>A  | Splice Site       | SLC9A5   |          | solute carrier family 9,   | s16 (0.00) | 18 (0.28)  | 0.44 |
| 12-02 | Gp3 | g.chr17:33802396T>A  | Missense Mutation | SLFN12L  | p.K438M  | schlafen family member     | 117 (0.00) | 107 (0.25) | 0.67 |
| 12-02 | Gp3 | g.chr17:33802417T>A  | Missense Mutation | SLFN12L  | p.E431V  | schlafen family member     | 113 (0.00) | 107 (0.24) | 0.65 |
| 12-02 | Gp3 | g.chr3:57882601C>T   | Splice Site       | SLMAP    | p.D447D  | sarcolemma associated      | 124 (0.00) | 72 (0.26)  | 0.70 |
| 12-02 | Gp3 | g.chr22:24145550G>T  | Missense Mutation | SMARCB1  | p.R144L  | SWI/SNF related, matri     | 37 (0.00)  | 26 (0.19)  | 0.51 |
| 12-02 | Gp3 | g.chr3:47755931G>T   | Missense Mutation | SMARCC1  | p.P256T  | SWI/SNF related, matri     | 39 (0.00)  | 28 (0.21)  | 0.57 |
| 12-02 | Gp3 | g.chr10:112361622C>A | Missense Mutation | SMC3     | p.Q958K  | structural maintenance c   | 63 (0.00)  | 33 (0.27)  | 0.73 |



|       |     |                     |                   |            |          |                                    |            |      |
|-------|-----|---------------------|-------------------|------------|----------|------------------------------------|------------|------|
| 12-02 | Gp3 | g.chr3:160120546C>A | Missense Mutation | SMC4       | p.A134E  | structural maintenance c39 (0.00)  | 45 (0.51)  | 1.36 |
| 12-02 | Gp3 | g.chr18:73139411C>G | Silent            | SMIM21     | p.L36L   | small integral membran62 (0.00)    | 36 (0.42)  | 1.11 |
| 12-02 | Gp3 | g.chr1:28280984C>G  | Missense Mutation | SMPDL3B    | p.Q213E  | sphingomyelin phospho33 (0.00)     | 29 (0.28)  | 0.92 |
| 12-02 | Gp3 | g.chr1:153633687A>G | Silent            | SNAPIN     | p.R107R  | SNAP-associated protei15 (0.00)    | 28 (0.39)  | 1.05 |
| 12-02 | Gp3 | g.chr5:121785594C>A | Silent            | SNCAIP     | p.A596A  | synuclein, alpha interact23 (0.00) | 22 (0.32)  | 0.85 |
| 12-02 | Gp3 | g.chr7:127544868C>A | Missense Mutation | SND1       | p.S508Y  | staphylococcal nuclease29 (0.00)   | 12 (0.50)  | 1.33 |
| 12-02 | Gp3 | g.chr17:47010675C>A | Missense Mutation | SNF8       | p.K152N  | SNF8, ESCRT-II compl44 (0.00)      | 43 (0.19)  | 0.60 |
| 12-02 | Gp3 | g.chr15:25436590C>A | RNA               | SNHG14     |          | small nucleolar RNA ho17 (0.00)    | 64 (0.33)  | 1.13 |
| 12-02 | Gp3 | g.chr15:25442760G>A | RNA               | SNHG14     |          | small nucleolar RNA ho20 (0.00)    | 49 (0.20)  | 0.70 |
| 12-02 | Gp3 | g.chr20:37062515A>G | RNA               | SNORA71D   |          | small nucleolar RNA, H20 (0.00)    | 29 (0.17)  | 0.46 |
| 12-02 | Gp3 | g.chr2:96956098G>T  | Missense Mutation | SNRNP200   | p.A903E  | small nuclear ribonuclec37 (0.00)  | 40 (0.47)  | 1.27 |
| 12-02 | Gp3 | g.chr2:27596984C>T  | Silent            | SNX17      | p.D155D  | sorting nexin 17 27 (0.00)         | 54 (0.22)  | 0.59 |
| 12-02 | Gp3 | g.chr2:27596987G>T  | Missense Mutation | SNX17      | p.L156F  | sorting nexin 17 27 (0.00)         | 56 (0.23)  | 0.62 |
| 12-02 | Gp3 | g.chr8:101608959C>A | Nonsense Mutation | SNX31      | p.E296*  | sorting nexin 31 68 (0.00)         | 51 (0.20)  | 0.52 |
| 12-02 | Gp3 | g.chr10:97101359G>A | Missense Mutation | SORBS1     | p.H836Y  | sorbin and SH3 domain 39 (0.00)    | 23 (0.22)  | 0.58 |
| 12-02 | Gp3 | g.chr2:231307730G>C | Silent            | SP100      | p.V62V   | SP100 nuclear antigen 43 (0.02)    | 20 (0.30)  | 0.80 |
| 12-02 | Gp3 | g.chr2:231150502G>A | Missense Mutation | SP140      | p.E474K  | SP140 nuclear body pro45 (0.02)    | 20 (0.25)  | 0.67 |
| 12-02 | Gp3 | g.chr2:174820638C>A | Missense Mutation | SP3        | p.S201I  | Sp3 transcription factor 63 (0.00) | 55 (0.42)  | 0.65 |
| 12-02 | Gp3 | g.chr7:123595132C>T | Nonsense Mutation | SPAM1      | p.R346*  | sperm adhesion molecul62 (0.00)    | 19 (0.32)  | 0.84 |
| 12-02 | Gp3 | g.chr9:43624970G>T  | Silent            | SPATA31A6  | p.V1239V | SPATA31 subfamily A, 87 (0.00)     | 90 (0.40)  | 1.40 |
| 12-02 | Gp3 | g.chr9:84608706G>C  | Silent            | SPATA31D1  | p.L1107L | SPATA31 subfamily D, 38 (0.00)     | 48 (0.19)  | 0.50 |
| 12-02 | Gp3 | g.chr9:84534432C>T  | RNA               | SPATA31D5P |          | SPATA31 subfamily D, 46 (0.00)     | 35 (0.20)  | 0.53 |
| 12-02 | Gp3 | g.chr3:52741771C>A  | Missense Mutation | SPCS1      | p.S84R   | signal peptidase comple69 (0.00)   | 34 (0.35)  | 0.94 |
| 12-02 | Gp3 | g.chr15:44890856G>T | Missense Mutation | SPG11      | p.Q1289K | spastic paraplegia 11 (at15 (0.00) | 17 (0.47)  | 1.25 |
| 12-02 | Gp3 | g.chr15:65273278G>A | Missense Mutation | SPG21      | p.P50L   | spastic paraplegia 21 (at26 (0.00) | 24 (0.62)  | 1.67 |
| 12-02 | Gp3 | g.chr5:147715203C>A | Silent            | SPINK9     | p.L9L    | serine peptidase inhibito25 (0.00) | 44 (0.36)  | 0.97 |
| 12-02 | Gp3 | g.chr17:47690822G>T | Intron            | SPOP       |          | speckle-type POZ protei116 (0.00)  | 99 (0.21)  | 0.57 |
| 12-02 | Gp3 | g.chr17:47716368G>T | Intron            | SPOP       |          | speckle-type POZ protei32 (0.00)   | 28 (0.29)  | 0.76 |
| 12-02 | Gp3 | g.chr17:47748965G>A | Intron            | SPOP       |          | speckle-type POZ protei53 (0.00)   | 21 (0.24)  | 0.63 |
| 12-02 | Gp3 | g.chr15:51041898T>A | Missense Mutation | SPPL2A     | p.T38S   | signal peptide peptidase59 (0.00)  | 31 (0.23)  | 0.60 |
| 12-02 | Gp3 | g.chr9:131374506T>A | Missense Mutation | SPTAN1     | p.F1670Y | spectrin, alpha, non-eryt41 (0.00) | 25 (0.32)  | 1.07 |
| 12-02 | Gp3 | g.chr14:65216805G>T | Missense Mutation | SPTB       | p.L2224M | spectrin, beta, erythrocy33 (0.00) | 106 (0.20) | 0.53 |
| 12-02 | Gp3 | g.chr19:41008789G>A | Silent            | SPTBN4     | p.K437K  | spectrin, beta, non-eryth18 (0.00) | 37 (0.32)  | 1.14 |
| 12-02 | Gp3 | g.chr16:30731516C>T | Silent            | SRCAP      | p.L951L  | Snf2-related CREBBP a112 (0.00)    | 313 (0.15) | 0.54 |
| 12-02 | Gp3 | g.chr5:121356079G>A | Missense Mutation | SRFBP1     | p.E217K  | serum response factor bi30 (0.00)  | 13 (0.62)  | 1.64 |

|       |     |                      |                   |          |          |                            |            |            |      |
|-------|-----|----------------------|-------------------|----------|----------|----------------------------|------------|------------|------|
| 12-02 | Gp3 | g.chr10:70856979C>G  | Missense Mutation | SRGN     | p.D73E   | serglycin                  | 56 (0.00)  | 47 (0.19)  | 0.51 |
| 12-02 | Gp3 | g.chr7:87839339G>T   | Missense Mutation | SRI      | p.T119K  | sorcin                     | 89 (0.00)  | 60 (0.27)  | 0.71 |
| 12-02 | Gp3 | g.chr6:35806147C>A   | Nonsense Mutation | SRPK1    | p.G584*  | SRSF protein kinase 1      | 15 (0.00)  | 28 (0.32)  | 0.86 |
| 12-02 | Gp3 | g.chr6:35837363G>A   | Missense Mutation | SRPK1    | p.S436L  | SRSF protein kinase 1      | 116 (0.00) | 67 (0.30)  | 0.80 |
| 12-02 | Gp3 | g.chr1:29476663C>A   | Missense Mutation | SRSF4    | p.R207L  | serine/arginine-rich splic | 25 (0.00)  | 36 (0.39)  | 1.29 |
| 12-02 | Gp3 | g.chrX:48047112C>A   | Silent            | SSX5     | p.L215L  | synovial sarcoma, X bre    | 29 (0.00)  | 50 (0.26)  | 0.43 |
| 12-02 | Gp3 | g.chr11:8747652G>T   | Missense Mutation | ST5      | p.T482N  | suppression of tumorige    | 72 (0.00)  | 68 (0.18)  | 0.47 |
| 12-02 | Gp3 | g.chr12:104121073C>A | Missense Mutation | STAB2    | p.P1627Q | stabilin 2                 | 48 (0.00)  | 24 (0.29)  | 0.46 |
| 12-02 | Gp3 | g.chr13:33686946C>T  | Missense Mutation | STARD13  | p.E802K  | StAR-related lipid trans   | 39 (0.00)  | 27 (0.22)  | 0.59 |
| 12-02 | Gp3 | g.chr17:40474502C>T  | Silent            | STAT3    | p.Q633Q  | signal transducer and ac   | 44 (0.00)  | 35 (0.14)  | 0.51 |
| 12-02 | Gp3 | g.chr7:87910242G>A   | Silent            | STEAP4   | p.F379F  | STEAP family member        | 109 (0.00) | 65 (0.18)  | 0.49 |
| 12-02 | Gp3 | g.chr19:19119186T>C  | Missense Mutation | SUGP2    | p.Q797R  | SURP and G patch dom       | 63 (0.00)  | 76 (0.28)  | 0.96 |
| 12-02 | Gp3 | g.chr12:56397724C>T  | Missense Mutation | SUOX     | p.P184L  | sulfite oxidase            | 25 (0.00)  | 31 (0.23)  | 0.60 |
| 12-02 | Gp3 | g.chr1:223441958C>A  | Nonsense Mutation | SUSD4    | p.E141*  | sushi domain containing    | 54 (0.00)  | 39 (0.15)  | 0.41 |
| 12-02 | Gp3 | g.chr11:67957491C>T  | Missense Mutation | SUV420H1 | p.G18E   | suppressor of variegatio   | 58 (0.02)  | 37 (0.43)  | 1.51 |
| 12-02 | Gp3 | g.chr9:113169630T>C  | Silent            | SVEP1    | p.A2727A | sushi, von Willebrand f    | 86 (0.00)  | 72 (0.33)  | 0.89 |
| 12-02 | Gp3 | g.chr6:10961598G>A   | Silent            | SYCP2L   | p.Q772Q  | synaptonemal complex       | 17 (0.00)  | 17 (0.29)  | 0.78 |
| 12-02 | Gp3 | g.chr6:152690127C>A  | Missense Mutation | SYNE1    | p.A3263S | spectrin repeat containi   | 41 (0.00)  | 24 (0.25)  | 0.67 |
| 12-02 | Gp3 | g.chr6:152757134G>C  | Missense Mutation | SYNE1    | p.Q1418E | spectrin repeat containi   | 21 (0.00)  | 23 (0.22)  | 0.58 |
| 12-02 | Gp3 | g.chr14:64443362G>A  | Missense Mutation | SYNE2    | p.E404K  | spectrin repeat containi   | 47 (0.00)  | 36 (0.19)  | 0.52 |
| 12-02 | Gp3 | g.chr14:64634243G>A  | Silent            | SYNE2    | p.K5472K | spectrin repeat containi   | 72 (0.00)  | 41 (0.22)  | 0.59 |
| 12-02 | Gp3 | g.chr14:64683042G>T  | Missense Mutation | SYNE2    | p.M6412I | spectrin repeat containi   | 40 (0.00)  | 23 (0.39)  | 1.04 |
| 12-02 | Gp3 | g.chr14:64683054G>C  | Missense Mutation | SYNE2    | p.R6416S | spectrin repeat containi   | 42 (0.00)  | 24 (0.38)  | 1.00 |
| 12-02 | Gp3 | g.chr14:70842443C>A  | Missense Mutation | SYNJ2BP  | p.D83Y   | synaptojanin 2 binding     | 165 (0.00) | 19 (0.26)  | 0.70 |
| 12-02 | Gp3 | g.chr17:35879117C>A  | Missense Mutation | SYNRG    | p.A1236S | synergin, gamma            | 46 (0.00)  | 41 (0.37)  | 0.98 |
| 12-02 | Gp3 | g.chr12:33579132T>A  | Missense Mutation | SYT10    | p.E150D  | synaptotagmin X            | 149 (0.00) | 92 (0.36)  | 0.96 |
| 12-02 | Gp3 | g.chr12:33579178T>C  | Missense Mutation | SYT10    | p.H135R  | synaptotagmin X            | 130 (0.00) | 100 (0.17) | 0.45 |
| 12-02 | Gp3 | g.chr11:85407428G>A  | Silent            | SYTL2    | p.T820T  | synaptotagmin-like 2       | 44 (0.02)  | 34 (0.56)  | 1.49 |
| 12-02 | Gp3 | g.chr6:132892049A>G  | Missense Mutation | TAAR6    | p.N197D  | trace amine associated r   | 26 (0.00)  | 17 (0.41)  | 1.10 |
| 12-02 | Gp3 | g.chr10:71166902G>C  | Silent            | TACR2    | p.L292L  | tachykinin receptor 2      | 15 (0.00)  | 37 (0.24)  | 0.65 |
| 12-02 | Gp3 | g.chr18:23845190A>G  | Missense Mutation | TAF4B    | p.T134A  | TAF4b RNA polymeras        | 142 (0.00) | 43 (0.21)  | 0.56 |
| 12-02 | Gp3 | g.chrX:77394376G>T   | Missense Mutation | TAF9B    | p.P33T   | TAF9B RNA polymeras        | 36 (0.03)  | 63 (0.24)  | 0.40 |
| 12-02 | Gp3 | g.chr17:61466060C>T  | Missense Mutation | TANC2    | p.T845I  | tetratricopeptide repea    | 49 (0.00)  | 33 (0.21)  | 0.57 |
| 12-02 | Gp3 | g.chr17:27857622G>A  | Missense Mutation | TAOK1    | p.M782I  | TAO kinase 1               | 49 (0.00)  | 45 (0.18)  | 0.47 |
| 12-02 | Gp3 | g.chr5:33461303C>T   | Missense Mutation | TARS     | p.T518M  | threonyl-tRNA syntheta     | 40 (0.00)  | 30 (0.17)  | 0.44 |

|       |     |                      |                   |          |          |                                      |            |      |
|-------|-----|----------------------|-------------------|----------|----------|--------------------------------------|------------|------|
| 12-02 | Gp3 | g.chr12:10954406G>A  | Missense Mutation | TAS2R7   | p.T255I  | taste receptor, type 2, m 18 (0.00)  | 12 (0.50)  | 0.93 |
| 12-02 | Gp3 | g.chr12:65269534C>A  | Missense Mutation | TBC1D30  | p.P751H  | TBC1 domain family, n 28 (0.00)      | 28 (0.25)  | 0.67 |
| 12-02 | Gp3 | g.chr3:17349593G>A   | Silent            | TBC1D5   | p.F343F  | TBC1 domain family, n 63 (0.00)      | 13 (0.54)  | 1.44 |
| 12-02 | Gp3 | g.chr4:141600967C>T  | Missense Mutation | TBC1D9   | p.D131N  | TBC1 domain family, n 92 (0.00)      | 25 (0.28)  | 0.75 |
| 12-02 | Gp3 | g.chr1:235599871C>A  | Missense Mutation | TBCE     | p.S304Y  | tubulin folding cofactor 58 (0.00)   | 26 (0.27)  | 0.72 |
| 12-02 | Gp3 | g.chr1:168260401G>C  | Silent            | TBX19    | p.R69R   | T-box 19 69 (0.00)                   | 28 (0.18)  | 0.48 |
| 12-02 | Gp3 | g.chr22:42608730G>A  | Missense Mutation | TCF20    | p.S861F  | transcription factor 20 (41 (0.00)   | 71 (0.24)  | 0.82 |
| 12-02 | Gp3 | g.chr1:152057504T>C  | Missense Mutation | TCHHL1   | p.Q885R  | trichohyalin-like 1 23 (0.00)        | 29 (0.21)  | 0.72 |
| 12-02 | Gp3 | g.chr1:152058269C>A  | Missense Mutation | TCHHL1   | p.R630I  | trichohyalin-like 1 59 (0.00)        | 58 (0.12)  | 0.42 |
| 12-02 | Gp3 | g.chr14:104490960C>G | Missense Mutation | TDRD9    | p.N887K  | tudor domain containing 47 (0.00)    | 47 (0.47)  | 1.25 |
| 12-02 | Gp3 | g.chrX:123516567C>T  | Missense Mutation | TENM1    | p.E2458K | teneurin transmembrane 47 (0.00)     | 21 (0.48)  | 0.79 |
| 12-02 | Gp3 | g.chrX:123518535C>A  | Missense Mutation | TENM1    | p.E2075D | teneurin transmembrane 36 (0.00)     | 16 (0.94)  | 1.56 |
| 12-02 | Gp3 | g.chr4:183673017G>A  | Missense Mutation | TENM3    | p.D1232N | teneurin transmembrane 76 (0.00)     | 78 (0.27)  | 0.72 |
| 12-02 | Gp3 | g.chr4:183673030G>A  | Missense Mutation | TENM3    | p.R1236H | teneurin transmembrane 76 (0.01)     | 79 (0.27)  | 0.71 |
| 12-02 | Gp3 | g.chr5:1278815G>A    | Missense Mutation | TERT     | p.R743W  | telomerase reverse trans 17 (0.00)   | 116 (0.28) | 0.76 |
| 12-02 | Gp3 | g.chr10:70333434T>C  | Missense Mutation | TET1     | p.S447P  | tet methylcytosine dioxy 19 (0.00)   | 29 (0.17)  | 0.46 |
| 12-02 | Gp3 | g.chr17:56707861G>T  | Missense Mutation | TEX14    | p.A64E   | testis expressed 14 70 (0.00)        | 64 (0.47)  | 1.25 |
| 12-02 | Gp3 | g.chr17:62290437C>A  | Nonsense Mutation | TEX2     | p.E381*  | testis expressed 2 39 (0.00)         | 14 (0.36)  | 0.95 |
| 12-02 | Gp3 | g.chr3:133476651A>T  | Silent            | TF       | p.L303L  | transferrin 16 (0.00)                | 18 (0.44)  | 1.19 |
| 12-02 | Gp3 | g.chr6:50803808G>A   | Missense Mutation | TFAP2B   | p.M212I  | transcription factor AP-2 44 (0.00)  | 70 (0.30)  | 0.80 |
| 12-02 | Gp3 | g.chr21:43771015A>T  | Missense Mutation | TFF2     | p.C18S   | trefoil factor 2 15 (0.00)           | 46 (0.22)  | 0.77 |
| 12-02 | Gp3 | g.chr3:195780359G>T  | Missense Mutation | TFRC     | p.T657K  | transferrin receptor 24 (0.00)       | 14 (0.50)  | 1.33 |
| 12-02 | Gp3 | g.chr8:133945878A>G  | Missense Mutation | TG       | p.Y1630C | thyroglobulin 21 (0.00)              | 13 (0.38)  | 1.03 |
| 12-02 | Gp3 | g.chr3:30686397G>C   | Missense Mutation | TGFBR2   | p.V85L   | transforming growth fac 27 (0.00)    | 20 (0.25)  | 0.67 |
| 12-02 | Gp3 | g.chr11:134119082C>A | Missense Mutation | THYN1    | p.E153D  | thymocyte nuclear prote 55 (0.00)    | 19 (0.42)  | 1.12 |
| 12-02 | Gp3 | g.chr15:90167004G>T  | Nonsense Mutation | TICRR    | p.E1155* | TOPBP1-interacting chε 32 (0.00)     | 33 (0.18)  | 0.48 |
| 12-02 | Gp3 | g.chr3:114026778C>A  | Missense Mutation | TIGIT    | p.L179I  | T cell immunoreceptor v 70 (0.00)    | 21 (0.24)  | 0.63 |
| 12-02 | Gp3 | g.chr6:54254647G>A   | Missense Mutation | TINAG    | p.R452Q  | tubulointerstitial nephrit 31 (0.00) | 22 (0.32)  | 0.85 |
| 12-02 | Gp3 | g.chr6:43468505G>T   | Missense Mutation | TJAP1    | p.R41S   | tight junction associated 32 (0.00)  | 56 (0.25)  | 0.67 |
| 12-02 | Gp3 | g.chr15:30053453G>T  | Missense Mutation | TJP1     | p.S304Y  | tight junction protein 1 17 (0.00)   | 11 (0.73)  | 1.94 |
| 12-02 | Gp3 | g.chr9:35721775A>T   | Missense Mutation | TLN1     | p.L325Q  | talin 1 29 (0.00)                    | 10 (0.60)  | 1.60 |
| 12-02 | Gp3 | g.chrX:12905384C>T   | Missense Mutation | TLR7     | p.T586I  | toll-like receptor 7 23 (0.00)       | 11 (0.91)  | 1.52 |
| 12-02 | Gp3 | g.chr15:102182682C>T | Silent            | TM2D3    | p.*222*  | TM2 domain containing 54 (0.00)      | 48 (0.42)  | 1.11 |
| 12-02 | Gp3 | g.chr10:98287907T>A  | Silent            | TM9SF3   | p.A474A  | transmembrane 9 superf 124 (0.01)    | 17 (0.29)  | 0.78 |
| 12-02 | Gp3 | g.chr17:41368509G>T  | Missense Mutation | TMEM106A | p.M157I  | transmembrane protein 72 (0.00)      | 77 (0.13)  | 0.42 |

|       |     |                     |                   |          |          |                           |            |            |      |
|-------|-----|---------------------|-------------------|----------|----------|---------------------------|------------|------------|------|
| 12-02 | Gp3 | g.chr7:12263868G>A  | Missense Mutation | TMEM106B | p.A100T  | transmembrane protein     | 89 (0.00)  | 36 (0.64)  | 1.70 |
| 12-02 | Gp3 | g.chr12:44770413T>C | Silent            | TMEM117  | p.D268D  | transmembrane protein     | 26 (0.00)  | 24 (0.33)  | 0.89 |
| 12-02 | Gp3 | g.chr19:36038275C>T | Nonsense Mutation | TMEM147  | p.R201*  | transmembrane protein     | 18 (0.00)  | 38 (0.21)  | 0.56 |
| 12-02 | Gp3 | g.chr6:130762909G>A | Missense Mutation | TMEM200A | p.V448I  | transmembrane protein     | 19 (0.00)  | 16 (0.31)  | 0.83 |
| 12-02 | Gp3 | g.chr3:100277349C>A | Missense Mutation | TMEM45A  | p.F184L  | transmembrane protein     | 43 (0.00)  | 34 (0.21)  | 0.55 |
| 12-02 | Gp3 | g.chr21:34823166G>T | Missense Mutation | TMEM50B  | p.L146M  | transmembrane protein     | 23 (0.00)  | 16 (0.31)  | 0.83 |
| 12-02 | Gp3 | g.chr21:34832806C>T | Missense Mutation | TMEM50B  | p.R96Q   | transmembrane protein     | 70 (0.00)  | 40 (0.17)  | 0.47 |
| 12-02 | Gp3 | g.chr10:45430320T>A | Missense Mutation | TMEM72   | p.I71N   | transmembrane protein     | 19 (0.00)  | 35 (0.23)  | 0.61 |
| 12-02 | Gp3 | g.chr8:109797266C>A | Missense Mutation | TMEM74   | p.W21L   | transmembrane protein     | 33 (0.00)  | 33 (0.18)  | 0.48 |
| 12-02 | Gp3 | g.chr3:69092059A>C  | Missense Mutation | TMF1     | p.I528S  | TATA element modulato     | 50 (0.02)  | 34 (0.15)  | 0.39 |
| 12-02 | Gp3 | g.chr21:42854759C>G | Intron            | TMPRSS2  |          | transmembrane protease    | 86 (0.00)  | 24 (0.62)  | 0.55 |
| 12-02 | Gp3 | g.chr6:47251962T>G  | Missense Mutation | TNFRSF21 | p.T319P  | tumor necrosis factor re  | 31 (0.00)  | 25 (0.28)  | 0.75 |
| 12-02 | Gp3 | g.chr16:24817028C>A | Missense Mutation | TNRC6A   | p.Q1409K | trinucleotide repeat cont | 44 (0.00)  | 29 (0.21)  | 0.55 |
| 12-02 | Gp3 | g.chr17:76060904G>C | Missense Mutation | TNRC6C   | p.A830P  | trinucleotide repeat cont | 20 (0.00)  | 44 (0.16)  | 0.58 |
| 12-02 | Gp3 | g.chr20:39750417G>A | Missense Mutation | TOP1     | p.A678T  | topoisomerase (DNA) I     | 88 (0.00)  | 34 (0.18)  | 0.47 |
| 12-02 | Gp3 | g.chr17:38555073A>G | Silent            | TOP2A    | p.Y1135Y | topoisomerase (DNA) II    | 64 (0.00)  | 46 (0.15)  | 0.41 |
| 12-02 | Gp3 | g.chr17:38569100C>A | Missense Mutation | TOP2A    | p.D234Y  | topoisomerase (DNA) II    | 44 (0.00)  | 33 (0.27)  | 0.73 |
| 12-02 | Gp3 | g.chr3:133368251A>T | Missense Mutation | TOPBP1   | p.Y494N  | topoisomerase (DNA) II    | 48 (0.00)  | 35 (0.14)  | 0.38 |
| 12-02 | Gp3 | g.chr17:7583487C>A  | Intron            | TP53     |          | tumor protein p53         | 83 (0.00)  | 30 (0.23)  | 0.42 |
| 12-02 | Gp3 | g.chr12:72366489C>A | Missense Mutation | TPH2     | p.L267M  | tryptophan hydroxylase    | 38 (0.00)  | 21 (0.24)  | 0.63 |
| 12-02 | Gp3 | g.chr1:186304610G>C | Missense Mutation | TPR      | p.Q1591E | translocated promoter re  | 103 (0.00) | 50 (0.22)  | 0.59 |
| 12-02 | Gp3 | g.chr13:41407011G>A | RNA               | TPTE2P5  |          | transmembrane phospho     | 16 (0.00)  | 45 (0.27)  | 0.71 |
| 12-02 | Gp3 | g.chr11:36511543C>A | Missense Mutation | TRAF6    | p.G472C  | TNF receptor-associate    | 88 (0.00)  | 35 (0.20)  | 0.53 |
| 12-02 | Gp3 | g.chr3:42235335A>G  | Missense Mutation | TRAK1    | p.E233G  | trafficking protein, kine | 44 (0.00)  | 28 (0.46)  | 1.24 |
| 12-02 | Gp3 | g.chr3:36873409G>T  | Silent            | TRANK1   | p.V1961V | tetratricopeptide repeat  | 47 (0.00)  | 34 (0.21)  | 0.55 |
| 12-02 | Gp3 | g.chr3:36873876C>T  | Missense Mutation | TRANK1   | p.D1806N | tetratricopeptide repeat  | 57 (0.00)  | 50 (0.30)  | 0.80 |
| 12-02 | Gp3 | g.chr3:36887807C>A  | Missense Mutation | TRANK1   | p.R1114L | tetratricopeptide repeat  | 53 (0.00)  | 32 (0.16)  | 0.42 |
| 12-02 | Gp3 | g.chr3:36898759G>T  | Missense Mutation | TRANK1   | p.S224R  | tetratricopeptide repeat  | 118 (0.00) | 134 (0.37) | 1.00 |
| 12-02 | Gp3 | g.chr14:22690311C>A | RNA               | TRAV35   |          | T cell receptor alpha var | 27 (0.00)  | 34 (0.24)  | 0.63 |
| 12-02 | Gp3 | g.chr3:140407162C>A | Missense Mutation | TRIM42   | p.D546E  | tripartite motif containi | 16 (0.00)  | 39 (0.23)  | 0.62 |
| 12-02 | Gp3 | g.chr1:248039662T>A | Silent            | TRIM58   | p.L444L  | tripartite motif containi | 19 (0.00)  | 25 (0.92)  | 2.45 |
| 12-02 | Gp3 | g.chr3:32933116G>A  | Missense Mutation | TRIM71   | p.R807H  | tripartite motif containi | 16 (0.00)  | 43 (0.19)  | 0.50 |
| 12-02 | Gp3 | g.chr5:14391099C>G  | Splice Site       | TRIO     | p.D1406E | trio Rho guanine nucleo   | 48 (0.00)  | 37 (0.16)  | 0.43 |
| 12-02 | Gp3 | g.chrX:100278457A>G | Splice Site       | TRMT2B   |          | tRNA methyltransferase    | 37 (0.00)  | 16 (0.31)  | 0.52 |
| 12-02 | Gp3 | g.chr4:8453703C>A   | Missense Mutation | TRMT44   | p.T324N  | tRNA methyltransferase    | 51 (0.00)  | 74 (0.20)  | 0.54 |

|       |     |                      |                   |         |           |                                      |           |      |
|-------|-----|----------------------|-------------------|---------|-----------|--------------------------------------|-----------|------|
| 12-02 | Gp3 | g.chr3:142511685G>A  | Missense Mutation | TRPC1   | p.R486Q   | transient receptor potent69 (0.00)   | 14 (0.43) | 1.14 |
| 12-02 | Gp3 | g.chr11:101341937G>C | Missense Mutation | TRPC6   | p.Q718E   | transient receptor potent64 (0.00)   | 31 (0.39) | 1.03 |
| 12-02 | Gp3 | g.chr9:73442927C>T   | Missense Mutation | TRPM3   | p.R270Q   | transient receptor potent56 (0.00)   | 25 (0.20) | 0.53 |
| 12-02 | Gp3 | g.chr9:135781021C>A  | Silent            | TSC1    | p.V648V   | tuberous sclerosis 1 43 (0.00)       | 30 (0.27) | 0.71 |
| 12-02 | Gp3 | g.chr14:81554324C>T  | Missense Mutation | TSHR    | p.T115I   | thyroid stimulating horn27 (0.00)    | 18 (0.28) | 0.74 |
| 12-02 | Gp3 | g.chr14:81609744G>C  | Missense Mutation | TSHR    | p.V448L   | thyroid stimulating horn83 (0.00)    | 32 (0.16) | 0.42 |
| 12-02 | Gp3 | g.chr18:73000416C>T  | Silent            | TSHZ1   | p.L1018L  | teashirt zinc finger hom638 (0.00)   | 95 (0.16) | 0.42 |
| 12-02 | Gp3 | g.chr20:51870976G>T  | Missense Mutation | TSHZ2   | p.V327F   | teashirt zinc finger hom624 (0.00)   | 35 (0.14) | 0.38 |
| 12-02 | Gp3 | g.chr19:31769454G>T  | Silent            | TSHZ3   | p.T415T   | teashirt zinc finger hom616 (0.00)   | 68 (0.21) | 0.55 |
| 12-02 | Gp3 | g.chr9:135277342C>T  | Silent            | TTF1    | p.E289E   | transcription termination25 (0.00)   | 32 (0.31) | 0.83 |
| 12-02 | Gp3 | g.chr1:117617738C>A  | Missense Mutation | TTF2    | p.L178I   | transcription termination61 (0.00)   | 73 (0.18) | 0.47 |
| 12-02 | Gp3 | g.chr2:179397138G>A  | Missense Mutation | TTN     | p.T34735M | titin 43 (0.00)                      | 48 (0.40) | 0.62 |
| 12-02 | Gp3 | g.chr2:179442145C>A  | Missense Mutation | TTN     | p.G22973C | titin 47 (0.00)                      | 28 (0.29) | 0.44 |
| 12-02 | Gp3 | g.chr2:179486027C>G  | Missense Mutation | TTN     | p.V15140L | titin 58 (0.00)                      | 17 (0.71) | 1.10 |
| 12-02 | Gp3 | g.chr2:179501181C>A  | Missense Mutation | TTN     | p.C13758F | titin 42 (0.00)                      | 22 (0.77) | 1.20 |
| 12-02 | Gp3 | g.chr2:179501436G>A  | Missense Mutation | TTN     | p.P13673L | titin 58 (0.00)                      | 16 (0.31) | 0.49 |
| 12-02 | Gp3 | g.chr12:49579161C>A  | Missense Mutation | TUBA1A  | p.A330S   | tubulin, alpha 1a 22 (0.00)          | 81 (0.19) | 0.49 |
| 12-02 | Gp3 | g.chr12:49522361C>A  | Nonsense Mutation | TUBA1B  | p.G246*   | tubulin, alpha 1b 49 (0.00)          | 38 (0.16) | 0.42 |
| 12-02 | Gp3 | g.chr12:49666937C>A  | Missense Mutation | TUBA1C  | p.A426D   | tubulin, alpha 1c 67 (0.00)          | 75 (0.20) | 0.53 |
| 12-02 | Gp3 | g.chr18:9886890A>G   | Silent            | TXNDC2  | p.S138S   | thioredoxin domain con135 (0.00)     | 28 (0.46) | 1.24 |
| 12-02 | Gp3 | g.chr18:672920G>T    | Missense Mutation | TYMS    | p.D255Y   | thymidylate synthetase 64 (0.00)     | 36 (0.31) | 0.81 |
| 12-02 | Gp3 | g.chr7:66514944G>A   | Silent            | TYW1    | p.K331K   | tRNA-yW synthesizing 57 (0.00)       | 72 (0.28) | 0.74 |
| 12-02 | Gp3 | g.chr7:66515021C>A   | Missense Mutation | TYW1    | p.T357N   | tRNA-yW synthesizing 37 (0.00)       | 27 (0.19) | 0.49 |
| 12-02 | Gp3 | g.chr3:142751748C>G  | Missense Mutation | U2SURP  | p.T578S   | U2 snRNP-associated S119 (0.00)      | 17 (0.29) | 0.78 |
| 12-02 | Gp3 | g.chr9:33944417C>A   | Missense Mutation | UBAP2   | p.Q497H   | ubiquitin associated pro138 (0.00)   | 32 (0.22) | 0.58 |
| 12-02 | Gp3 | g.chr11:118263500C>T | Silent            | UBE4A   | p.A995A   | ubiquitination factor E4.24 (0.00)   | 25 (0.64) | 1.71 |
| 12-02 | Gp3 | g.chr6:42619772G>T   | Silent            | UBR2    | p.A859A   | ubiquitin protein ligase 124 (0.00)  | 16 (0.38) | 1.00 |
| 12-02 | Gp3 | g.chr8:103323643C>A  | Missense Mutation | UBR5    | p.D828Y   | ubiquitin protein ligase 1130 (0.00) | 55 (0.15) | 0.39 |
| 12-02 | Gp3 | g.chr13:76141399C>T  | Missense Mutation | UCHL3   | p.S126F   | ubiquitin carboxyl-termi57 (0.00)    | 33 (0.15) | 0.40 |
| 12-02 | Gp3 | g.chr4:39507325C>A   | Missense Mutation | UGDH    | p.R317L   | UDP-glucose 6-dehydro69 (0.00)       | 25 (0.28) | 0.75 |
| 12-02 | Gp3 | g.chr4:69426370A>T   | Missense Mutation | UGT2B17 | p.V297E   | UDP glucuronosyltransf36 (0.00)      | 21 (0.57) | 1.52 |
| 12-02 | Gp3 | g.chr4:70146274G>A   | Missense Mutation | UGT2B28 | p.S19N    | UDP glucuronosyltransf227 (0.00)     | 50 (0.24) | 0.64 |
| 12-02 | Gp3 | g.chr17:19698941C>T  | Missense Mutation | ULK2    | p.D699N   | unc-51 like autophagy a 51 (0.00)    | 13 (0.46) | 1.23 |
| 12-02 | Gp3 | g.chr8:35579755T>C   | Missense Mutation | UNC5D   | p.L326S   | unc-5 homolog D (C. ele19 (0.00)     | 33 (0.15) | 0.40 |
| 12-02 | Gp3 | g.chr2:210698857G>T  | Missense Mutation | UNC80   | p.E964D   | unc-80 homolog (C. ele167 (0.00)     | 42 (0.36) | 0.95 |

|       |     |                      |                   |         |          |                           |            |            |      |
|-------|-----|----------------------|-------------------|---------|----------|---------------------------|------------|------------|------|
| 12-02 | Gp3 | g.chr2:210837021G>C  | Missense Mutation | UNC80   | p.V2714L | unc-80 homolog (C. elei   | 36 (0.00)  | 31 (0.19)  | 0.52 |
| 12-02 | Gp3 | g.chr7:48141508G>T   | Missense Mutation | UPP1    | p.D84Y   | uridine phosphorylase 1   | 24 (0.00)  | 73 (0.26)  | 0.69 |
| 12-02 | Gp3 | g.chr16:21968622C>G  | Missense Mutation | UQCRC2  | p.Q34E   | ubiquinol-cytochrome c    | 37 (0.00)  | 30 (0.17)  | 0.44 |
| 12-02 | Gp3 | g.chr1:229772149C>A  | Missense Mutation | URB2    | p.L597M  | URB2 ribosome biogen      | 33 (0.00)  | 34 (0.15)  | 0.39 |
| 12-02 | Gp3 | g.chr16:84778667G>A  | Missense Mutation | USP10   | p.A194T  | ubiquitin specific peptid | 29 (0.00)  | 55 (0.40)  | 0.64 |
| 12-02 | Gp3 | g.chr3:49155192C>A   | Missense Mutation | USP19   | p.A124S  | ubiquitin specific peptid | 33 (0.00)  | 65 (0.20)  | 0.53 |
| 12-02 | Gp3 | g.chr1:55620435G>A   | Missense Mutation | USP24   | p.T488I  | ubiquitin specific peptid | 44 (0.00)  | 22 (0.27)  | 0.73 |
| 12-02 | Gp3 | g.chr2:219362537C>T  | Missense Mutation | USP37   | p.E329K  | ubiquitin specific peptid | 25 (0.00)  | 21 (0.33)  | 0.89 |
| 12-02 | Gp3 | g.chr3:49335984C>T   | Splice Site       | USP4    |          | ubiquitin specific peptid | 63 (0.00)  | 38 (0.29)  | 0.77 |
| 12-02 | Gp3 | g.chr10:11531171C>T  | Missense Mutation | USP6NL  | p.M198I  | USP6 N-terminal like      | 38 (0.00)  | 13 (0.54)  | 1.44 |
| 12-02 | Gp3 | g.chr6:144809821C>T  | Nonsense Mutation | UTRN    | p.Q1329* | utrophin                  | 83 (0.00)  | 33 (0.18)  | 0.48 |
| 12-02 | Gp3 | g.chr1:7839694G>A    | Missense Mutation | VAMP3   | p.V70I   | vesicle-associated mem    | 42 (0.00)  | 44 (0.32)  | 1.06 |
| 12-02 | Gp3 | g.chr19:6843173C>A   | Missense Mutation | VAV1    | p.L670I  | vav 1 guanine nucleotid   | 38 (0.00)  | 18 (0.33)  | 1.24 |
| 12-02 | Gp3 | g.chr19:53762707C>T  | Missense Mutation | VN1R2   | p.P360L  | vomer nasal 1 receptor    | 62 (0.00)  | 23 (0.35)  | 0.93 |
| 12-02 | Gp3 | g.chr3:51517767G>A   | Silent            | VPRBP   | p.G26G   | Vpr (HIV-1) binding pr    | 37 (0.00)  | 62 (0.29)  | 0.77 |
| 12-02 | Gp3 | g.chr9:79954534C>T   | Missense Mutation | VPS13A  | p.L2161F | vacuolar protein sorting  | 43 (0.00)  | 16 (0.38)  | 1.00 |
| 12-02 | Gp3 | g.chr12:122745868G>C | Missense Mutation | VPS33A  | p.S141R  | vacuolar protein sorting  | 23 (0.00)  | 53 (0.28)  | 0.45 |
| 12-02 | Gp3 | g.chr11:123988985C>A | Nonsense Mutation | VWA5A   | p.C128*  | von Willebrand factor A   | 26 (0.00)  | 34 (0.24)  | 0.63 |
| 12-02 | Gp3 | g.chr4:85678111C>A   | Missense Mutation | WDFY3   | p.V1798F | WD repeat and FYVE d      | 15 (0.00)  | 36 (0.28)  | 0.74 |
| 12-02 | Gp3 | g.chr4:177069470C>A  | Missense Mutation | WDR17   | p.H627Q  | WD repeat domain 17       | 34 (0.00)  | 16 (0.31)  | 0.83 |
| 12-02 | Gp3 | g.chr4:39274642C>A   | Missense Mutation | WDR19   | p.L1176I | WD repeat domain 19       | 80 (0.00)  | 52 (0.21)  | 0.56 |
| 12-02 | Gp3 | g.chr1:118483795G>T  | Missense Mutation | WDR3    | p.D280Y  | WD repeat domain 3        | 53 (0.00)  | 15 (0.33)  | 0.89 |
| 12-02 | Gp3 | g.chr12:122404860G>A | Splice Site       | WDR66   |          | WD repeat domain 66       | 36 (0.00)  | 118 (0.31) | 0.48 |
| 12-02 | Gp3 | g.chr19:38379838C>A  | Missense Mutation | WDR87   | p.E1452D | WD repeat domain 87       | 50 (0.00)  | 46 (0.22)  | 0.58 |
| 12-02 | Gp3 | g.chr19:33651330C>A  | Silent            | WDR88   | p.L336L  | WD repeat domain 88       | 77 (0.00)  | 49 (0.24)  | 0.65 |
| 12-02 | Gp3 | g.chr8:38146035C>A   | Missense Mutation | WHSC1L1 | p.W1157C | Wolf-Hirschhorn syndrc    | 59 (0.00)  | 31 (0.19)  | 0.52 |
| 12-02 | Gp3 | g.chr6:112382276G>A  | Missense Mutation | WISP3   | p.R44H   | WNT1 inducible signali    | 31 (0.00)  | 26 (0.31)  | 0.82 |
| 12-02 | Gp3 | g.chr12:990024C>A    | Nonsense Mutation | WNK1    | p.Y990*  | WNK lysine deficient p    | 27 (0.00)  | 13 (0.38)  | 1.03 |
| 12-02 | Gp3 | g.chr17:40940179C>T  | Missense Mutation | WNK4    | p.P632L  | WNK lysine deficient p    | 32 (0.00)  | 37 (0.22)  | 0.77 |
| 12-02 | Gp3 | g.chr4:184236868G>A  | Missense Mutation | WWC2    | p.A1189T | WW and C2 domain cor      | 58 (0.00)  | 47 (0.17)  | 0.45 |
| 12-02 | Gp3 | g.chr8:87473466C>G   | Missense Mutation | WWP1    | p.T838R  | WW domain containing      | 32 (0.00)  | 27 (0.22)  | 0.59 |
| 12-02 | Gp3 | g.chr3:14200805G>T   | Intron            | XPC     |          | xeroderma pigmentosun     | 54 (0.00)  | 47 (0.17)  | 0.45 |
| 12-02 | Gp3 | g.chr3:14205299C>G   | Intron            | XPC     |          | xeroderma pigmentosun     | 64 (0.00)  | 47 (0.36)  | 0.96 |
| 12-02 | Gp3 | g.chr3:14213076G>A   | Intron            | XPC     |          | xeroderma pigmentosun     | 15 (0.00)  | 18 (0.61)  | 1.63 |
| 12-02 | Gp3 | g.chr3:141162384G>T  | Missense Mutation | ZBTB38  | p.R385M  | zinc finger and BTB do    | 144 (0.00) | 59 (0.34)  | 0.90 |

|       |     |                     |                   |          |          |                                        |            |      |
|-------|-----|---------------------|-------------------|----------|----------|----------------------------------------|------------|------|
| 12-02 | Gp3 | g.chr16:11857362C>G | Silent            | ZC3H7A   | p.L658L  | zinc finger CCCH-type 36 (0.00)        | 43 (0.30)  | 0.81 |
| 12-02 | Gp3 | g.chr9:37304241C>G  | Silent            | ZCCHC7   | p.A237A  | zinc finger, CCHC domain 69 (0.00)     | 80 (0.28)  | 0.73 |
| 12-02 | Gp3 | g.chr3:44975392G>A  | Silent            | ZDHHC3   | p.F206F  | zinc finger, DHHC-type 42 (0.00)       | 50 (0.38)  | 1.01 |
| 12-02 | Gp3 | g.chr10:46122064A>T | Missense Mutation | ZFAND4   | p.S403T  | zinc finger, AN1-type domain 25 (0.00) | 22 (0.23)  | 0.61 |
| 12-02 | Gp3 | g.chr19:57065950G>A | Missense Mutation | ZFP28    | p.R599K  | ZFP28 zinc finger protein 62 (0.00)    | 25 (0.40)  | 1.07 |
| 12-02 | Gp3 | g.chr3:15127415C>A  | Missense Mutation | ZFYVE20  | p.D115Y  | zinc finger, FYVE domain 65 (0.00)     | 37 (0.41)  | 1.08 |
| 12-02 | Gp3 | g.chr1:52810518G>T  | Missense Mutation | ZFYVE9   | p.A1340S | zinc finger, FYVE domain 26 (0.00)     | 30 (0.37)  | 0.98 |
| 12-02 | Gp3 | g.chr8:124268084G>C | Missense Mutation | ZHX1     | p.L35V   | zinc fingers and homeodomain 61 (0.00) | 17 (0.53)  | 1.41 |
| 12-02 | Gp3 | g.chr8:123964256G>T | Missense Mutation | ZHX2     | p.G169V  | zinc fingers and homeodomain 17 (0.00) | 38 (0.18)  | 0.49 |
| 12-02 | Gp3 | g.chr20:39833311G>T | Nonsense Mutation | ZHX3     | p.C82*   | zinc fingers and homeodomain 65 (0.00) | 72 (0.15)  | 0.41 |
| 12-02 | Gp3 | g.chr19:57654000G>T | Silent            | ZIM3     | p.S4S    | zinc finger, imprinted 3 30 (0.00)     | 64 (0.16)  | 0.42 |
| 12-02 | Gp3 | g.chr3:178745465G>T | Silent            | ZMAT3    | p.R176R  | zinc finger, matrin-type 35 (0.00)     | 18 (0.33)  | 0.89 |
| 12-02 | Gp3 | g.chr7:64168806T>C  | Silent            | ZNF107   | p.T708T  | zinc finger protein 107 30 (0.00)      | 36 (0.33)  | 1.11 |
| 12-02 | Gp3 | g.chr3:44670656G>A  | Missense Mutation | ZNF197   | p.E4K    | zinc finger protein 197 71 (0.00)      | 40 (0.47)  | 1.27 |
| 12-02 | Gp3 | g.chr19:12246643G>A | Missense Mutation | ZNF20    | p.S27F   | zinc finger protein 20 92 (0.00)       | 106 (0.12) | 0.42 |
| 12-02 | Gp3 | g.chr19:12246665C>A | Nonsense Mutation | ZNF20    | p.E20*   | zinc finger protein 20 88 (0.00)       | 99 (0.11)  | 0.38 |
| 12-02 | Gp3 | g.chr19:22156230T>A | Missense Mutation | ZNF208   | p.T536S  | zinc finger protein 208 55 (0.00)      | 49 (0.24)  | 0.85 |
| 12-02 | Gp3 | g.chr19:53304387G>A | Silent            | ZNF28    | p.H237H  | zinc finger protein 28 45 (0.00)       | 28 (0.25)  | 0.67 |
| 12-02 | Gp3 | g.chr5:150322148C>G | RNA               | ZNF300P1 |          | zinc finger protein 300 42 (0.00)      | 22 (0.23)  | 0.61 |
| 12-02 | Gp3 | g.chr10:38345036G>T | Nonsense Mutation | ZNF33A   | p.E662*  | zinc finger protein 33A 50 (0.00)      | 46 (0.17)  | 0.46 |
| 12-02 | Gp3 | g.chr19:53651958C>G | Missense Mutation | ZNF347   | p.E84Q   | zinc finger protein 347 98 (0.00)      | 24 (0.25)  | 0.67 |
| 12-02 | Gp3 | g.chr3:21552471C>A  | Missense Mutation | ZNF385D  | p.K107N  | zinc finger protein 385E 17 (0.00)     | 16 (0.31)  | 0.83 |
| 12-02 | Gp3 | g.chr10:31138920G>C | Missense Mutation | ZNF438   | p.I138M  | zinc finger protein 438 55 (0.00)      | 49 (0.14)  | 0.38 |
| 12-02 | Gp3 | g.chr9:109689859T>C | Silent            | ZNF462   | p.N67N   | zinc finger protein 462 108 (0.00)     | 94 (0.18)  | 0.48 |
| 12-02 | Gp3 | g.chr9:109701274G>T | Missense Mutation | ZNF462   | p.V1011F | zinc finger protein 462 88 (0.00)      | 68 (0.60)  | 1.61 |
| 12-02 | Gp3 | g.chr9:95609765G>C  | Missense Mutation | ZNF484   | p.T435S  | zinc finger protein 484 53 (0.00)      | 20 (0.25)  | 0.80 |
| 12-02 | Gp3 | g.chr19:31039081G>T | Missense Mutation | ZNF536   | p.G852V  | zinc finger protein 536 21 (0.00)      | 26 (0.19)  | 0.51 |
| 12-02 | Gp3 | g.chr19:12639427G>C | Nonsense Mutation | ZNF564   | p.Y29*   | zinc finger protein 564 34 (0.00)      | 24 (0.38)  | 1.30 |
| 12-02 | Gp3 | g.chr19:58929080C>A | Missense Mutation | ZNF584   | p.Q399K  | zinc finger protein 584 22 (0.00)      | 14 (0.36)  | 0.95 |
| 12-02 | Gp3 | g.chr15:85341118C>T | Silent            | ZNF592   | p.V806V  | zinc finger protein 592 21 (0.00)      | 26 (0.42)  | 1.13 |
| 12-02 | Gp3 | g.chr5:123977099C>T | Splice Site       | ZNF608   |          | zinc finger protein 608 39 (0.00)      | 31 (0.23)  | 0.60 |
| 12-02 | Gp3 | g.chr1:91405466C>T  | Missense Mutation | ZNF644   | p.R482H  | zinc finger protein 644 59 (0.00)      | 20 (0.40)  | 1.07 |
| 12-02 | Gp3 | g.chr9:40772410T>A  | Silent            | ZNF658   | p.V955V  | zinc finger protein 658 35 (0.00)      | 34 (0.29)  | 1.03 |
| 12-02 | Gp3 | g.chr19:53669557C>T | Silent            | ZNF665   | p.G62G   | zinc finger protein 665 58 (0.00)      | 92 (0.17)  | 0.46 |
| 12-02 | Gp3 | g.chr19:12015784C>A | Missense Mutation | ZNF69    | p.P191H  | zinc finger protein 69 25 (0.00)       | 18 (0.50)  | 1.73 |

|       |     |                     |                   |          |          |                            |            |            |      |
|-------|-----|---------------------|-------------------|----------|----------|----------------------------|------------|------------|------|
| 12-02 | Gp3 | g.chr19:21281633C>G | Missense Mutation | ZNF714   | p.S20C   | zinc finger protein 714    | 114 (0.00) | 30 (0.37)  | 1.27 |
| 12-02 | Gp3 | g.chr19:53959648C>T | RNA               | ZNF761   |          | zinc finger protein 761    | 37 (0.00)  | 44 (0.32)  | 0.85 |
| 12-02 | Gp3 | g.chr16:89289592G>C | Missense Mutation | ZNF778   | p.V49L   | zinc finger protein 778    | 17 (0.00)  | 29 (0.34)  | 0.55 |
| 12-02 | Gp3 | g.chr19:40541505C>A | Nonsense Mutation | ZNF780B  | p.E273*  | zinc finger protein 780B56 | 66 (0.00)  | 66 (0.30)  | 1.06 |
| 12-02 | Gp3 | g.chr19:52663830G>T | Missense Mutation | ZNF836   | p.F10L   | zinc finger protein 836    | 83 (0.00)  | 88 (0.22)  | 0.58 |
| 12-02 | Gp3 | g.chr19:52580251C>T | Silent            | ZNF841   | p.R34R   | zinc finger protein 841    | 74 (0.01)  | 58 (0.33)  | 0.87 |
| 12-02 | Gp3 | g.chr9:115760372A>G | lincRNA           | ZNF883   |          | zinc finger protein 883    | 17 (0.00)  | 14 (0.43)  | 1.14 |
| 12-02 | Gp3 | g.chr19:23542697G>C | Silent            | ZNF91    | p.G1028G | zinc finger protein 91     | 51 (0.00)  | 57 (0.21)  | 0.73 |
| 12-02 | Gp3 | g.chr19:22574433C>A | Missense Mutation | ZNF98    | p.R535I  | zinc finger protein 98     | 26 (0.00)  | 15 (0.33)  | 1.15 |
| 12-02 | Gp3 | g.chr20:47887522G>T | Missense Mutation | ZNFX1    | p.S276Y  | zinc finger, NFX1-type     | 33 (0.00)  | 14 (0.36)  | 0.95 |
| 12-02 | Gp3 | g.chr15:43653933T>A | Nonsense Mutation | ZSCAN29  | p.K633*  | zinc finger and SCAN d91   | 31 (0.00)  | 31 (0.19)  | 0.52 |
| 12-02 | Gp3 | g.chr5:60839313C>A  | Silent            | ZSWIM6   | p.T939T  | zinc finger, SWIM-type     | 45 (0.00)  | 39 (0.21)  | 0.55 |
| 12-02 | Gp3 | g.chr17:3967998G>A  | Missense Mutation | ZZEF1    | p.R1459C | zinc finger, ZZ-type wit   | 17 (0.00)  | 23 (0.22)  | 0.39 |
| 12-02 | Gp4 | g.chr17:67178897C>T | Silent            | ABCA10   | p.L850L  | ATP-binding cassette, s1   | 50 (0.00)  | 37 (0.30)  | 0.79 |
| 12-02 | Gp4 | g.chr5:5209280G>A   | Missense Mutation | ADAMTS16 | p.G509E  | ADAM metallopeptidas       | 130 (0.00) | 28 (0.18)  | 0.48 |
| 12-02 | Gp4 | g.chr1:202914155G>T | Missense Mutation | ADIPOR1  | p.H191Q  | adiponectin receptor 1     | 110 (0.00) | 19 (0.32)  | 0.84 |
| 12-02 | Gp4 | g.chr10:76468088C>A | Missense Mutation | ADK      | p.S325Y  | adenosine kinase           | 33 (0.00)  | 33 (0.24)  | 0.65 |
| 12-02 | Gp4 | g.chr1:36492763C>T  | Silent            | AGO3     | p.P485P  | argonaute RISC catalyti    | 45 (0.00)  | 53 (0.25)  | 0.65 |
| 12-02 | Gp4 | g.chr4:114278572C>G | Missense Mutation | ANK2     | p.S2900C | ankyrin 2, neuronal        | 126 (0.00) | 44 (0.20)  | 0.55 |
| 12-02 | Gp4 | g.chr9:95650549C>G  | RNA               | ANKRD19P |          | ankyrin repeat domain 1    | 57 (0.00)  | 30 (0.20)  | 0.85 |
| 12-02 | Gp4 | g.chr16:4780000C>A  | Missense Mutation | ANKS3    | p.V51L   | ankyrin repeat and steril  | 107 (0.00) | 133 (0.14) | 0.48 |
| 12-02 | Gp4 | g.chr12:57874614C>A | Missense Mutation | ARHGAP9  | p.S28I   | Rho GTPase activating j    | 37 (0.00)  | 17 (0.29)  | 0.78 |
| 12-02 | Gp4 | g.chr1:183596706C>T | Silent            | ARPC5    | p.G142G  | actin related protein 2/3  | 82 (0.00)  | 25 (0.24)  | 0.50 |
| 12-02 | Gp4 | g.chr9:119488112G>A | Missense Mutation | ASTN2    | p.T864I  | astrotactin 2              | 26 (0.00)  | 35 (0.23)  | 0.97 |
| 12-02 | Gp4 | g.chr2:25965484G>A  | Missense Mutation | ASXL2    | p.T1241I | additional sex combs lik   | 91 (0.00)  | 36 (0.22)  | 0.59 |
| 12-02 | Gp4 | g.chr3:11402189G>C  | Silent            | ATG7     | p.S538S  | autophagy related 7        | 100 (0.00) | 29 (0.34)  | 0.92 |
| 12-02 | Gp4 | g.chr15:25924600G>C | Missense Mutation | ATP10A   | p.A1463G | ATPase, class V, type 1    | 34 (0.00)  | 44 (0.18)  | 0.64 |
| 12-02 | Gp4 | g.chr4:47578884T>A  | Missense Mutation | ATP10D   | p.L1154H | ATPase, class V, type 1    | 40 (0.00)  | 47 (0.28)  | 0.74 |
| 12-02 | Gp4 | g.chr1:160145974C>A | Missense Mutation | ATP1A4   | p.L802I  | ATPase, Na+/K+ transp      | 47 (0.00)  | 47 (0.23)  | 0.62 |
| 12-02 | Gp4 | g.chrX:119504659C>A | Missense Mutation | ATP1B4   | p.P140T  | ATPase, Na+/K+ transp      | 40 (0.00)  | 15 (0.60)  | 1.00 |
| 12-02 | Gp4 | g.chr10:7841022C>A  | Nonsense Mutation | ATP5C1   | p.S98*   | ATP synthase, H+ transj    | 46 (0.00)  | 35 (0.14)  | 0.38 |
| 12-02 | Gp4 | g.chr3:63973759G>C  | Missense Mutation | ATXN7    | p.A374P  | ataxin 7                   | 33 (0.00)  | 12 (0.42)  | 1.11 |
| 12-02 | Gp4 | g.chr17:63554478G>A | Silent            | AXIN2    | p.G87G   | axin 2                     | 17 (0.00)  | 108 (0.17) | 0.44 |
| 12-02 | Gp4 | g.chr20:48259037G>T | Missense Mutation | B4GALT5  | p.R192S  | UDP-Gal:betaGlcNAc t       | 18 (0.00)  | 14 (0.43)  | 1.14 |
| 12-02 | Gp4 | g.chr21:11072874G>A | RNA               | BAGE2    |          | B melanoma antigen far     | 24 (0.00)  | 41 (0.22)  | 0.59 |



|       |     |                      |                   |          |          |                                      |            |      |
|-------|-----|----------------------|-------------------|----------|----------|--------------------------------------|------------|------|
| 12-02 | Gp4 | g.chr2:32670704G>A   | Silent            | BIRC6    | p.R1484R | baculoviral IAP repeat c 66 (0.00)   | 51 (0.24)  | 0.63 |
| 12-02 | Gp4 | g.chr2:32800247C>A   | Missense Mutation | BIRC6    | p.P4390Q | baculoviral IAP repeat c 160 (0.01)  | 50 (0.20)  | 0.53 |
| 12-02 | Gp4 | g.chr15:91348569T>C  | Intron            | BLM      |          | Bloom syndrome, RecQ46 (0.00)        | 181 (0.17) | 0.44 |
| 12-02 | Gp4 | g.chr15:91358394G>T  | Missense Mutation | BLM      | p.S1249I | Bloom syndrome, RecQ43 (0.00)        | 36 (0.17)  | 0.44 |
| 12-02 | Gp4 | g.chr2:198646561G>A  | Missense Mutation | BOLL     | p.S5L    | boule-like RNA-binding44 (0.00)      | 14 (0.43)  | 1.14 |
| 12-02 | Gp4 | g.chr17:41230870G>T  | Intron            | BRCA1    |          | breast cancer 1, early on28 (0.00)   | 25 (0.20)  | 0.53 |
| 12-02 | Gp4 | g.chr17:41230871G>T  | Intron            | BRCA1    |          | breast cancer 1, early on28 (0.00)   | 25 (0.20)  | 0.53 |
| 12-02 | Gp4 | g.chr10:98741863C>A  | Missense Mutation | C10orf12 | p.P239Q  | chromosome 10 open re 55 (0.00)      | 22 (0.27)  | 0.73 |
| 12-02 | Gp4 | g.chr11:76183749G>A  | Missense Mutation | C11orf30 | p.A339T  | chromosome 11 open re 48 (0.00)      | 12 (0.50)  | 1.33 |
| 12-02 | Gp4 | g.chr6:4087934G>C    | Missense Mutation | C6orf201 | p.R20P   | chromosome 6 open rea 44 (0.00)      | 45 (0.24)  | 0.65 |
| 12-02 | Gp4 | g.chr8:86250662G>A   | Silent            | CA1      | p.S18S   | carbonic anhydrase I 26 (0.00)       | 21 (0.24)  | 0.63 |
| 12-02 | Gp4 | g.chr19:13563723C>A  | Missense Mutation | CACNA1A  | p.W169L  | calcium channel, voltage 147 (0.00)  | 75 (0.20)  | 0.69 |
| 12-02 | Gp4 | g.chr3:85044605C>T   | Intron            | CADM2    |          | cell adhesion molecule 247 (0.00)    | 16 (0.31)  | 0.83 |
| 12-02 | Gp4 | g.chr3:85092397A>G   | Intron            | CADM2    |          | cell adhesion molecule 2117 (0.00)   | 48 (0.17)  | 0.44 |
| 12-02 | Gp4 | g.chr3:85155585C>T   | Intron            | CADM2    |          | cell adhesion molecule 256 (0.00)    | 35 (0.34)  | 0.91 |
| 12-02 | Gp4 | g.chr3:85314627A>G   | Intron            | CADM2    |          | cell adhesion molecule 224 (0.00)    | 29 (0.62)  | 1.66 |
| 12-02 | Gp4 | g.chr3:85457847C>T   | Intron            | CADM2    |          | cell adhesion molecule 245 (0.02)    | 11 (0.64)  | 1.70 |
| 12-02 | Gp4 | g.chr3:85469207G>T   | Intron            | CADM2    |          | cell adhesion molecule 276 (0.00)    | 21 (0.24)  | 0.63 |
| 12-02 | Gp4 | g.chr3:85481342G>A   | Intron            | CADM2    |          | cell adhesion molecule 237 (0.00)    | 46 (0.57)  | 1.51 |
| 12-02 | Gp4 | g.chr3:85593815C>G   | Intron            | CADM2    |          | cell adhesion molecule 226 (0.00)    | 41 (0.15)  | 0.39 |
| 12-02 | Gp4 | g.chr3:85961994C>T   | Intron            | CADM2    |          | cell adhesion molecule 227 (0.00)    | 15 (0.60)  | 1.60 |
| 12-02 | Gp4 | g.chr12:121690493C>T | Missense Mutation | CAMKK2   | p.V378M  | calcium/calmodulin-dep 17 (0.00)     | 16 (0.31)  | 0.83 |
| 12-02 | Gp4 | g.chr15:44671956G>A  | Missense Mutation | CASC4    | p.G291R  | cancer susceptibility car 100 (0.00) | 13 (0.38)  | 1.03 |
| 12-02 | Gp4 | g.chr19:38847451G>A  | Missense Mutation | CATSPERG | p.S422N  | catsper channel auxiliary 15 (0.00)  | 27 (0.26)  | 0.88 |
| 12-02 | Gp4 | g.chr5:114611244C>A  | Missense Mutation | CCDC112  | p.R113I  | coiled-coil domain cont: 71 (0.00)   | 16 (0.31)  | 0.83 |
| 12-02 | Gp4 | g.chr5:205685C>T     | Silent            | CCDC127  | p.Q170Q  | coiled-coil domain cont: 35 (0.00)   | 41 (0.15)  | 0.39 |
| 12-02 | Gp4 | g.chr1:117568275G>T  | Missense Mutation | CD101    | p.G858V  | CD101 molecule 33 (0.00)             | 15 (0.33)  | 0.89 |
| 12-02 | Gp4 | g.chr11:118223137G>A | Missense Mutation | CD3G     | p.D168N  | CD3g molecule, gamma 61 (0.00)       | 46 (0.15)  | 0.41 |
| 12-02 | Gp4 | g.chr8:25341691C>G   | Missense Mutation | CDCA2    | p.P444A  | cell division cycle assoc 42 (0.00)  | 19 (0.47)  | 1.26 |
| 12-02 | Gp4 | g.chr9:123280906C>T  | Silent            | CDK5RAP2 | p.E370E  | CDK5 regulatory subun 38 (0.00)      | 65 (0.09)  | 0.39 |
| 12-02 | Gp4 | g.chr18:13059180C>G  | Missense Mutation | CEP192   | p.P1453A | centrosomal protein 192 52 (0.00)    | 29 (0.21)  | 0.55 |
| 12-02 | Gp4 | g.chr20:40083367C>T  | Missense Mutation | CHD6     | p.V1007M | chromodomain helicase 63 (0.00)      | 18 (0.28)  | 0.44 |
| 12-02 | Gp4 | g.chr8:61735108C>A   | Missense Mutation | CHD7     | p.Q1002K | chromodomain helicase 231 (0.00)     | 38 (0.29)  | 0.77 |
| 12-02 | Gp4 | g.chr1:111825123C>T  | RNA               | CHIAP2   |          | chitinase, acidic pseudo: 57 (0.00)  | 28 (0.18)  | 0.48 |
| 12-02 | Gp4 | g.chr8:42587020C>T   | Silent            | CHRNB3   | p.V190V  | cholinergic receptor, nic 39 (0.00)  | 21 (0.48)  | 1.27 |

|       |     |                      |                   |          |          |                                      |           |      |
|-------|-----|----------------------|-------------------|----------|----------|--------------------------------------|-----------|------|
| 12-02 | Gp4 | g.chr2:175213326T>A  | Nonsense Mutation | CIR1     | p.R418*  | corepressor interacting v54 (0.00)   | 14 (0.36) | 0.95 |
| 12-02 | Gp4 | g.chr16:69184788G>C  | Missense Mutation | CIRH1A   | p.R328P  | cirrhosis, autosomal rec80 (0.00)    | 18 (0.33) | 0.40 |
| 12-02 | Gp4 | g.chr2:113509909C>A  | Missense Mutation | CKAP2L   | p.A513S  | cytoskeleton associated 106 (0.00)   | 22 (0.32) | 0.60 |
| 12-02 | Gp4 | g.chr7:155301689C>G  | Missense Mutation | CNPY1    | p.R15T   | canopy FGF signaling r28 (0.00)      | 34 (0.18) | 0.47 |
| 12-02 | Gp4 | g.chr17:55028133G>A  | Missense Mutation | COIL     | p.T157I  | coilin 76 (0.00)                     | 32 (0.25) | 0.67 |
| 12-02 | Gp4 | g.chr16:3786692G>A   | Silent            | CREBBP   | p.L1507L | CREB binding protein 18 (0.00)       | 55 (0.27) | 0.97 |
| 12-02 | Gp4 | g.chr13:37678938C>T  | Silent            | CSNK1A1L | p.K152K  | casein kinase 1, alpha 1-30 (0.00)   | 43 (0.37) | 0.99 |
| 12-02 | Gp4 | g.chr18:19995842G>A  | Missense Mutation | CTAGE1   | p.P645S  | cutaneous T-cell lympho43 (0.00)     | 31 (0.16) | 0.43 |
| 12-02 | Gp4 | g.chr10:102016176G>A | Missense Mutation | CWF19L1  | p.T116I  | CWF19-like 1, cell cycl41 (0.00)     | 46 (0.37) | 0.99 |
| 12-02 | Gp4 | g.chr3:45988339C>T   | Silent            | CXCR6    | p.C122C  | chemokine (C-X-C moti40 (0.00)       | 23 (0.48) | 1.28 |
| 12-02 | Gp4 | g.chr9:124356861C>A  | Intron            | DAB2IP   |          | DAB2 interacting protei21 (0.00)     | 80 (0.23) | 0.60 |
| 12-02 | Gp4 | g.chr9:124466813C>T  | Intron            | DAB2IP   |          | DAB2 interacting protei44 (0.00)     | 46 (0.15) | 0.41 |
| 12-02 | Gp4 | g.chr12:2061951G>A   | Silent            | DCP1B    | p.S259S  | decapping mRNA 1B 25 (0.00)          | 39 (0.18) | 0.48 |
| 12-02 | Gp4 | g.chr9:135522228G>T  | Missense Mutation | DDX31    | p.F500L  | DEAD (Asp-Glu-Ala-A 36 (0.00)        | 57 (0.11) | 0.51 |
| 12-02 | Gp4 | g.chr6:74117334C>G   | Missense Mutation | DDX43    | p.R345G  | DEAD (Asp-Glu-Ala-A 111 (0.00)       | 24 (0.33) | 0.89 |
| 12-02 | Gp4 | g.chrX:50147175G>A   | RNA               | DGKK     |          | diacylglycerol kinase, k31 (0.00)    | 18 (0.28) | 0.46 |
| 12-02 | Gp4 | g.chr11:117389208C>T | Missense Mutation | DSCAML1  | p.E555K  | Down syndrome cell adl47 (0.02)      | 53 (0.15) | 0.40 |
| 12-02 | Gp4 | g.chr6:56469416G>A   | Missense Mutation | DST      | p.S3126F | dystonin 49 (0.00)                   | 32 (0.16) | 0.42 |
| 12-02 | Gp4 | g.chr14:31917441C>G  | Missense Mutation | DTD2     | p.S134T  | D-tyrosyl-tRNA deacyl54 (0.00)       | 26 (0.31) | 0.82 |
| 12-02 | Gp4 | g.chr14:102486374C>A | Missense Mutation | DYNC1H1  | p.L2830M | dynein, cytoplasmic 1, h38 (0.00)    | 35 (0.20) | 0.53 |
| 12-02 | Gp4 | g.chr14:102498632C>G | Missense Mutation | DYNC1H1  | p.H3303D | dynein, cytoplasmic 1, h45 (0.00)    | 96 (0.16) | 0.42 |
| 12-02 | Gp4 | g.chr10:74899103G>C  | Missense Mutation | ECD      | p.S462C  | ecdysoneless homolog ( 20 (0.00)     | 34 (0.15) | 0.39 |
| 12-02 | Gp4 | g.chr6:8097537C>G    | Missense Mutation | EEF1E1   | p.G84A   | eukaryotic translation el 105 (0.00) | 22 (0.36) | 0.56 |
| 12-02 | Gp4 | g.chr12:10659443C>T  | Silent            | EIF2S3L  | p.I314I  | 55 (0.00)                            | 33 (0.15) | 0.40 |
| 12-02 | Gp4 | g.chr10:120809362C>T | Missense Mutation | EIF3A    | p.R870Q  | eukaryotic translation in 157 (0.01) | 79 (0.28) | 0.74 |
| 12-02 | Gp4 | g.chr3:184043696G>A  | Missense Mutation | EIF4G1   | p.G973D  | eukaryotic translation in 18 (0.00)  | 26 (0.19) | 0.71 |
| 12-02 | Gp4 | g.chr13:41515174G>A  | Missense Mutation | ELF1     | p.T380I  | E74-like factor 1 (ets do 71 (0.00)  | 20 (0.35) | 0.93 |
| 12-02 | Gp4 | g.chr1:19563635C>A   | Splice Site       | EMC1     |          | ER membrane protein c25 (0.00)       | 27 (0.26) | 0.69 |
| 12-02 | Gp4 | g.chr22:41569731C>G  | Silent            | EP300    | p.P1574P | E1A binding protein p3(48 (0.00)     | 77 (0.14) | 0.38 |
| 12-02 | Gp4 | g.chr3:37033529G>T   | Missense Mutation | EPM2AIP1 | p.T347N  | EPM2A (laforin) interac95 (0.00)     | 64 (0.16) | 0.42 |
| 12-02 | Gp4 | g.chr1:220170441C>G  | Missense Mutation | EPRS     | p.G809R  | glutamyl-prolyl-tRNA s 108 (0.00)    | 28 (0.18) | 0.48 |
| 12-02 | Gp4 | g.chr12:53673595C>A  | Missense Mutation | ESPL1    | p.S815Y  | extra spindle pole bodie24 (0.00)    | 56 (0.14) | 0.38 |
| 12-02 | Gp4 | g.chr1:11148256C>T   | Splice Site       | EXOSC10  |          | exosome component 10 42 (0.00)       | 11 (0.45) | 1.21 |
| 12-02 | Gp4 | g.chr2:203630211C>A  | Missense Mutation | FAM117B  | p.D498E  | family with sequence sii 108 (0.01)  | 39 (0.28) | 0.75 |
| 12-02 | Gp4 | g.chr11:92087946G>A  | Missense Mutation | FAT3     | p.D740N  | FAT atypical cadherin 3 112 (0.00)   | 22 (0.41) | 1.09 |

|       |     |                      |                   |           |          |                                       |           |      |
|-------|-----|----------------------|-------------------|-----------|----------|---------------------------------------|-----------|------|
| 12-02 | Gp4 | g.chr11:92523136G>T  | Missense Mutation | FAT3      | p.D1305Y | FAT atypical cadherin 353 (0.00)      | 33 (0.24) | 0.65 |
| 12-02 | Gp4 | g.chr17:73922903C>T  | Silent            | FBF1      | p.K163K  | Fas (TNFRSF6) binding 74 (0.00)       | 89 (0.15) | 0.49 |
| 12-02 | Gp4 | g.chr9:37537764G>A   | Silent            | FBXO10    | p.N254N  | F-box protein 10 34 (0.00)            | 61 (0.15) | 0.59 |
| 12-02 | Gp4 | g.chr8:17726142T>G   | Missense Mutation | FGL1      | p.M232L  | fibrinogen-like 1 34 (0.00)           | 19 (0.37) | 0.69 |
| 12-02 | Gp4 | g.chr4:159756585C>T  | Silent            | FNIP2     | p.S228S  | folliculin interacting pro 122 (0.00) | 14 (0.64) | 1.71 |
| 12-02 | Gp4 | g.chr9:85928634T>C   | Missense Mutation | FRMD3     | p.N209D  | FERM domain containi 19 (0.00)        | 22 (0.23) | 0.98 |
| 12-02 | Gp4 | g.chr9:37745173C>A   | Silent            | FRMPD1    | p.P1048P | FERM and PDZ domain 25 (0.00)         | 46 (0.17) | 0.69 |
| 12-02 | Gp4 | g.chr15:83455866C>T  | Missense Mutation | FSD2      | p.E93K   | fibronectin type III and 27 (0.00)    | 62 (0.15) | 0.39 |
| 12-02 | Gp4 | g.chr15:27572045C>T  | Silent            | GABRG3    | p.S120S  | gamma-aminobutyric ac 50 (0.00)       | 35 (0.43) | 1.51 |
| 12-02 | Gp4 | g.chr7:151791346G>A  | Missense Mutation | GALNT11   | p.G12R   | polypeptide N-acetylgl 32 (0.00)      | 20 (0.30) | 0.80 |
| 12-02 | Gp4 | g.chr15:42585049T>A  | Missense Mutation | GANC      | p.V149D  | glucosidase, alpha; neut 30 (0.00)    | 10 (0.60) | 1.60 |
| 12-02 | Gp4 | g.chr5:74021580C>T   | Splice Site       | GFM2      | p.G638E  | G elongation factor, mit 48 (0.00)    | 16 (0.31) | 0.83 |
| 12-02 | Gp4 | g.chr7:150389580G>A  | Missense Mutation | GIMAP2    | p.G69E   | GTPase, IMAP family n 32 (0.00)       | 24 (0.25) | 0.67 |
| 12-02 | Gp4 | g.chr19:3157839C>T   | Silent            | GNA15     | p.I286I  | guanine nucleotide bind 16 (0.00)     | 54 (0.17) | 0.62 |
| 12-02 | Gp4 | g.chr12:131476852G>A | Missense Mutation | GPR133    | p.G326E  | G protein-coupled recep 47 (0.00)     | 60 (0.15) | 0.40 |
| 12-02 | Gp4 | g.chrX:101909343G>A  | Missense Mutation | GPRASP1   | p.E168K  | G protein-coupled recep 31 (0.00)     | 11 (0.45) | 0.76 |
| 12-02 | Gp4 | g.chr5:150406521G>T  | Missense Mutation | GPX3      | p.C101F  | glutathione peroxidase 330 (0.00)     | 10 (0.50) | 1.33 |
| 12-02 | Gp4 | g.chr7:18656874A>G   | Intron            | HDAC9     |          | histone deacetylase 9 207 (0.00)      | 50 (0.18) | 0.48 |
| 12-02 | Gp4 | g.chr7:18784008C>A   | Intron            | HDAC9     |          | histone deacetylase 9 41 (0.00)       | 27 (0.33) | 0.89 |
| 12-02 | Gp4 | g.chr7:18886891C>G   | Intron            | HDAC9     |          | histone deacetylase 9 122 (0.00)      | 22 (0.32) | 0.85 |
| 12-02 | Gp4 | g.chr7:18969728C>G   | Intron            | HDAC9     |          | histone deacetylase 9 52 (0.00)       | 57 (0.16) | 0.42 |
| 12-02 | Gp4 | g.chr7:19003571G>A   | Intron            | HDAC9     |          | histone deacetylase 9 51 (0.00)       | 24 (0.25) | 0.67 |
| 12-02 | Gp4 | g.chr5:74655013G>A   | Missense Mutation | HMGCR     | p.E726K  | 3-hydroxy-3-methylglut 36 (0.00)      | 20 (0.70) | 1.87 |
| 12-02 | Gp4 | g.chr11:6461442C>G   | Missense Mutation | HPX       | p.V97L   | hemopexin 25 (0.00)                   | 18 (0.44) | 1.19 |
| 12-02 | Gp4 | g.chr14:102551084A>T | Silent            | HSP90AA1  | p.T305T  | heat shock protein 90kD 121 (0.00)    | 27 (0.26) | 0.69 |
| 12-02 | Gp4 | g.chr6:52880914C>T   | Silent            | ICK       | p.Q266Q  | intestinal cell (MAK-lik 43 (0.00)    | 19 (0.26) | 0.70 |
| 12-02 | Gp4 | g.chr8:39781054G>A   | Missense Mutation | IDO1      | p.E202K  | indoleamine 2,3-dioxyg 35 (0.00)      | 35 (0.14) | 0.38 |
| 12-02 | Gp4 | g.chr9:21350427G>A   | Silent            | IFNA6     | p.L154L  | interferon, alpha 6 25 (0.00)         | 18 (0.39) | 0.51 |
| 12-02 | Gp4 | g.chr15:99491860C>T  | Silent            | IGF1R     | p.G1214G | insulin-like growth fact 20 (0.00)    | 32 (0.16) | 0.42 |
| 12-02 | Gp4 | g.chr2:90193192G>T   | RNA               | IGKV1D-13 |          | immunoglobulin kappa 40 (0.00)        | 21 (0.29) | 0.76 |
| 12-02 | Gp4 | g.chr2:89278001C>A   | RNA               | IGKV3-7   |          | immunoglobulin kappa 39 (0.00)        | 17 (0.41) | 1.10 |
| 12-02 | Gp4 | g.chr6:137325851C>T  | Silent            | IL20RA    | p.L257L  | interleukin 20 receptor, 174 (0.00)   | 46 (0.35) | 0.93 |
| 12-02 | Gp4 | g.chr4:142955243G>A  | Intron            | INPP4B    |          | inositol polyphosphate- 32 (0.00)     | 57 (0.26) | 0.70 |
| 12-02 | Gp4 | g.chr4:142974221G>A  | Intron            | INPP4B    |          | inositol polyphosphate- 99 (0.00)     | 14 (0.50) | 1.33 |
| 12-02 | Gp4 | g.chr4:143250138A>T  | Intron            | INPP4B    |          | inositol polyphosphate- 104 (0.00)    | 33 (0.15) | 0.40 |

|       |     |                      |                   |           |          |                                               |            |           |      |
|-------|-----|----------------------|-------------------|-----------|----------|-----------------------------------------------|------------|-----------|------|
| 12-02 | Gp4 | g.chr4:143250196G>T  | Intron            | INPP4B    |          | inositol polyphosphate- $\epsilon$ 88 (0.00)  | 26 (0.19)  | 0.51      |      |
| 12-02 | Gp4 | g.chr4:143343025C>T  | Intron            | INPP4B    |          | inositol polyphosphate- $\epsilon$ 202 (0.00) | 35 (0.17)  | 0.46      |      |
| 12-02 | Gp4 | g.chr4:143538217C>T  | Intron            | INPP4B    |          | inositol polyphosphate- $\epsilon$ 80 (0.00)  | 14 (0.50)  | 1.33      |      |
| 12-02 | Gp4 | g.chr4:143717867G>A  | Intron            | INPP4B    |          | inositol polyphosphate- $\epsilon$ 85 (0.00)  | 20 (0.35)  | 0.93      |      |
| 12-02 | Gp4 | g.chr4:143738648C>A  | Intron            | INPP4B    |          | inositol polyphosphate- $\epsilon$ 62 (0.00)  | 19 (0.26)  | 0.70      |      |
| 12-02 | Gp4 | g.chr13:103443683C>G | Missense Mutation | KDEL1     | p.C257S  | KDEL (Lys-Asp-Glu-L $\epsilon$ 109 (0.00)     | 64 (0.16)  | 0.42      |      |
| 12-02 | Gp4 | g.chr11:67013573C>T  | Missense Mutation | KDM2A     | p.P651S  | lysine (K)-specific dem $\epsilon$ 41 (0.00)  | 26 (0.19)  | 0.66      |      |
| 12-02 | Gp4 | g.chr9:114176866C>G  | Missense Mutation | KIAA0368  | p.L610F  | KIAA0368                                      | 73 (0.00)  | 62 (0.10) | 0.41 |
| 12-02 | Gp4 | g.chr9:5919759G>A    | Silent            | KIAA2026  | p.A2079A | KIAA2026                                      | 156 (0.00) | 23 (0.30) | 0.40 |
| 12-02 | Gp4 | g.chr2:8918773C>A    | Missense Mutation | KIDINS220 | p.R900I  | kinase D-interacting sub94 (0.01)             | 24 (0.25)  | 0.67      |      |
| 12-02 | Gp4 | g.chr1:202897667T>A  | Missense Mutation | KLHL12    | p.N4I    | kelch-like family memb32 (0.00)               | 70 (0.23)  | 0.61      |      |
| 12-02 | Gp4 | g.chr21:31654967C>A  | Missense Mutation | KRTAP24-1 | p.C95F   | keratin associated protei29 (0.00)            | 34 (0.15)  | 0.39      |      |
| 12-02 | Gp4 | g.chr6:105405131C>T  | Silent            | LIN28B    | p.A2A    | lin-28 homolog B (C. el44 (0.00)              | 20 (0.35)  | 0.93      |      |
| 12-02 | Gp4 | g.chr13:76379776C>T  | Missense Mutation | LMO7      | p.P126L  | LIM domain 7                                  | 208 (0.00) | 62 (0.18) | 0.47 |
| 12-02 | Gp4 | g.chr4:62758425C>T   | Missense Mutation | LPHN3     | p.T443I  | latrophilin 3                                 | 62 (0.00)  | 50 (0.24) | 0.82 |
| 12-02 | Gp4 | g.chr2:170060624C>T  | Missense Mutation | LRP2      | p.G2625S | low density lipoprotein 186 (0.00)            | 17 (0.41)  | 0.80      |      |
| 12-02 | Gp4 | g.chr1:53716424C>A   | Nonsense Mutation | LRP8      | p.E425*  | low density lipoprotein 155 (0.00)            | 21 (0.29)  | 0.76      |      |
| 12-02 | Gp4 | g.chr6:25280058T>G   | Missense Mutation | LRRC16A   | p.L12W   | leucine rich repeat conta42 (0.00)            | 88 (0.16)  | 0.42      |      |
| 12-02 | Gp4 | g.chr9:114371364G>A  | RNA               | LRRC37A5P |          | leucine rich repeat conta68 (0.00)            | 52 (0.12)  | 0.49      |      |
| 12-02 | Gp4 | g.chr2:33246083G>A   | Missense Mutation | LTBP1     | p.D225N  | latent transforming grow18 (0.00)             | 35 (0.26)  | 0.69      |      |
| 12-02 | Gp4 | g.chr7:77702670G>A   | Intron            | MAGI2     |          | membrane associated gu33 (0.00)               | 54 (0.19)  | 0.49      |      |
| 12-02 | Gp4 | g.chr7:77779487T>C   | Intron            | MAGI2     |          | membrane associated gu77 (0.00)               | 19 (0.26)  | 0.70      |      |
| 12-02 | Gp4 | g.chr7:77781887A>G   | Intron            | MAGI2     |          | membrane associated gu44 (0.00)               | 14 (0.36)  | 0.95      |      |
| 12-02 | Gp4 | g.chr7:77937521C>T   | Intron            | MAGI2     |          | membrane associated gu50 (0.00)               | 15 (0.33)  | 0.89      |      |
| 12-02 | Gp4 | g.chr7:77976137C>G   | Intron            | MAGI2     |          | membrane associated gu97 (0.00)               | 30 (0.17)  | 0.44      |      |
| 12-02 | Gp4 | g.chr7:78059243G>C   | Intron            | MAGI2     |          | membrane associated gu67 (0.00)               | 13 (0.38)  | 1.03      |      |
| 12-02 | Gp4 | g.chr7:78080259G>A   | Intron            | MAGI2     |          | membrane associated gu16 (0.00)               | 21 (0.24)  | 0.63      |      |
| 12-02 | Gp4 | g.chr7:78140161C>T   | Intron            | MAGI2     |          | membrane associated gu62 (0.00)               | 20 (0.35)  | 0.93      |      |
| 12-02 | Gp4 | g.chr7:78324750C>A   | Intron            | MAGI2     |          | membrane associated gu69 (0.00)               | 71 (0.32)  | 0.86      |      |
| 12-02 | Gp4 | g.chr7:78338719C>G   | Intron            | MAGI2     |          | membrane associated gu99 (0.00)               | 48 (0.15)  | 0.39      |      |
| 12-02 | Gp4 | g.chr7:78350214T>A   | Intron            | MAGI2     |          | membrane associated gu51 (0.00)               | 20 (0.40)  | 1.07      |      |
| 12-02 | Gp4 | g.chr7:78394436G>A   | Intron            | MAGI2     |          | membrane associated gu74 (0.00)               | 12 (0.42)  | 1.11      |      |
| 12-02 | Gp4 | g.chr7:78511714C>A   | Intron            | MAGI2     |          | membrane associated gu54 (0.00)               | 28 (0.21)  | 0.57      |      |
| 12-02 | Gp4 | g.chr7:79025668C>T   | Intron            | MAGI2     |          | membrane associated gu70 (0.01)               | 33 (0.33)  | 0.89      |      |
| 12-02 | Gp4 | g.chr11:64566296C>A  | Missense Mutation | MAP4K2    | p.W356L  | mitogen-activated protei19 (0.00)             | 110 (0.25) | 0.68      |      |

|       |     |                     |                   |          |           |                           |            |            |      |
|-------|-----|---------------------|-------------------|----------|-----------|---------------------------|------------|------------|------|
| 12-02 | Gp4 | g.chr2:160599672G>A | Missense Mutation | MARCH7   | p.R47Q    | membrane-associated ri    | 62 (0.02)  | 28 (0.21)  | 0.57 |
| 12-02 | Gp4 | g.chr5:112720806C>A | Missense Mutation | MCC      | p.D92Y    | mutated in colorectal ca  | 49 (0.00)  | 40 (0.15)  | 0.40 |
| 12-02 | Gp4 | g.chr7:128141898G>T | Silent            | METTL2B  | p.G355G   | methyltransferase like 2  | 31 (0.00)  | 42 (0.19)  | 0.51 |
| 12-02 | Gp4 | g.chr3:179103507G>C | Missense Mutation | MFN1     | p.V605L   | mitofusin 1               | 66 (0.00)  | 45 (0.13)  | 0.50 |
| 12-02 | Gp4 | g.chr4:128865097A>T | Nonsense Mutation | MFSD8    | p.Y83*    | major facilitator superfa | 82 (0.01)  | 34 (0.24)  | 0.63 |
| 12-02 | Gp4 | g.chrX:10427723G>T  | Silent            | MID1     | p.G470G   | midline 1                 | 27 (0.00)  | 22 (0.27)  | 0.45 |
| 12-02 | Gp4 | g.chr20:10393719C>A | Missense Mutation | MKKS     | p.Q148H   | McKusick-Kaufman syr      | 55 (0.00)  | 21 (0.24)  | 0.63 |
| 12-02 | Gp4 | g.chr8:89128948C>A  | Splice Site       | MMP16    |           | matrix metallopeptidase   | 40 (0.00)  | 29 (0.24)  | 0.64 |
| 12-02 | Gp4 | g.chr21:37710234C>G | Missense Mutation | MORC3    | p.F150L   | MORC family CW-type       | 31 (0.00)  | 22 (0.41)  | 1.09 |
| 12-02 | Gp4 | g.chr2:202546268A>G | Missense Mutation | MPP4     | p.M201T   | membrane protein, palm    | 87 (0.00)  | 38 (0.21)  | 0.56 |
| 12-02 | Gp4 | g.chr10:30615413G>A | Missense Mutation | MTPAP    | p.P311L   | mitochondrial poly(A) p   | 29 (0.00)  | 16 (0.50)  | 1.33 |
| 12-02 | Gp4 | g.chr13:41791344C>A | Missense Mutation | MTRF1    | p.K415N   | mitochondrial translatio  | 71 (0.00)  | 21 (0.33)  | 0.89 |
| 12-02 | Gp4 | g.chr19:8969326G>A  | Nonsense Mutation | MUC16    | p.Q14340* | mucin 16, cell surface a: | 42 (0.00)  | 60 (0.17)  | 0.62 |
| 12-02 | Gp4 | g.chr19:9026244G>A  | Missense Mutation | MUC16    | p.R12248C | mucin 16, cell surface a: | 23 (0.00)  | 32 (0.25)  | 0.67 |
| 12-02 | Gp4 | g.chr19:9048863G>A  | Missense Mutation | MUC16    | p.T10923I | mucin 16, cell surface a: | 53 (0.00)  | 68 (0.16)  | 0.43 |
| 12-02 | Gp4 | g.chr19:9067082T>A  | Silent            | MUC16    | p.L6788L  | mucin 16, cell surface a: | 23 (0.00)  | 25 (0.28)  | 0.75 |
| 12-02 | Gp4 | g.chr19:9087268G>A  | Missense Mutation | MUC16    | p.T1516M  | mucin 16, cell surface a: | 77 (0.00)  | 41 (0.29)  | 0.78 |
| 12-02 | Gp4 | g.chr7:100680746A>G | Missense Mutation | MUC17    | p.T2017A  | mucin 17, cell surface a: | 67 (0.00)  | 26 (0.19)  | 0.51 |
| 12-02 | Gp4 | g.chr3:195453120C>A | Missense Mutation | MUC20    | p.A549E   | mucin 20, cell surface a: | 21 (0.00)  | 65 (0.12)  | 0.46 |
| 12-02 | Gp4 | g.chr9:113538176G>T | Silent            | MUSK     | p.V431V   | muscle, skeletal, receptc | 115 (0.01) | 58 (0.12)  | 0.51 |
| 12-02 | Gp4 | g.chr8:67492498A>T  | Missense Mutation | MYBL1    | p.M324K   | v-myb avian myeloblast    | 32 (0.00)  | 28 (0.46)  | 1.24 |
| 12-02 | Gp4 | g.chr17:10363323C>A | Missense Mutation | MYH4     | p.Q454H   | myosin, heavy chain 4, s: | 47 (0.00)  | 25 (0.28)  | 0.41 |
| 12-02 | Gp4 | g.chr3:175293950C>A | Missense Mutation | NAALADL2 | p.A592D   | N-acetylated alpha-linkε  | 85 (0.00)  | 28 (0.18)  | 0.66 |
| 12-02 | Gp4 | g.chr12:54894352G>A | Silent            | NCKAP1L  | p.E83E    | NCK-associated protein    | 41 (0.00)  | 29 (0.28)  | 0.74 |
| 12-02 | Gp4 | g.chr2:152497061C>A | Missense Mutation | NEB      | p.E2831D  | nebulin                   | 128 (0.01) | 112 (0.19) | 0.50 |
| 12-02 | Gp4 | g.chr2:152563433G>A | Missense Mutation | NEB      | p.L372F   | nebulin                   | 43 (0.00)  | 19 (0.32)  | 0.84 |
| 12-02 | Gp4 | g.chr1:16774394C>G  | Nonsense Mutation | NECAP2   | p.S41*    | NECAP endocytosis ass     | 15 (0.00)  | 18 (0.50)  | 1.33 |
| 12-02 | Gp4 | g.chr1:115828948C>T | Missense Mutation | NGF      | p.V157M   | nerve growth factor (bet  | 18 (0.00)  | 31 (0.23)  | 0.60 |
| 12-02 | Gp4 | g.chr11:7067911C>T  | Silent            | NLRP14   | p.R657R   | NLR family, pyrin domε    | 58 (0.00)  | 27 (0.19)  | 0.49 |
| 12-02 | Gp4 | g.chr5:176700786G>A | Splice Site       | NSD1     |           | nuclear receptor binding  | 43 (0.00)  | 17 (0.35)  | 0.94 |
| 12-02 | Gp4 | g.chr22:45571948C>T | Silent            | NUP50    | p.P109P   | nucleoporin 50kDa         | 49 (0.00)  | 29 (0.21)  | 0.55 |
| 12-02 | Gp4 | g.chr11:3765738C>A  | Splice Site       | NUP98    |           | nucleoporin 98kDa         | 33 (0.00)  | 15 (0.53)  | 1.42 |
| 12-02 | Gp4 | g.chr1:161954665C>T | Missense Mutation | OLFML2B  | p.R528Q   | olfactomedin-like 2B      | 28 (0.00)  | 16 (0.75)  | 2.00 |
| 12-02 | Gp4 | g.chr1:158576521C>T | Missense Mutation | OR10Z1   | p.A98V    | olfactory receptor, famil | 37 (0.00)  | 11 (0.45)  | 1.21 |
| 12-02 | Gp4 | g.chr9:107380150A>G | Silent            | OR13C9   | p.C112C   | olfactory receptor, famil | 102 (0.00) | 48 (0.12)  | 0.53 |

|       |     |                      |                   |          |          |                                     |            |      |
|-------|-----|----------------------|-------------------|----------|----------|-------------------------------------|------------|------|
| 12-02 | Gp4 | g.chr14:20295635A>G  | Missense Mutation | OR4N2    | p.R10G   | olfactory receptor, famil86 (0.00)  | 45 (0.24)  | 0.65 |
| 12-02 | Gp4 | g.chr11:5863080C>A   | Silent            | OR52E6   | p.L16L   | olfactory receptor, famil166 (0.00) | 42 (0.19)  | 0.51 |
| 12-02 | Gp4 | g.chr11:4615930C>T   | Missense Mutation | OR52I1   | p.S221F  | olfactory receptor, famil86 (0.01)  | 28 (0.29)  | 0.76 |
| 12-02 | Gp4 | g.chr11:4615957T>C   | Missense Mutation | OR52I1   | p.F230S  | olfactory receptor, famil129 (0.00) | 35 (0.17)  | 0.46 |
| 12-02 | Gp4 | g.chr11:5758669G>A   | Missense Mutation | OR56B1   | p.R308K  | olfactory receptor, famil54 (0.00)  | 22 (0.27)  | 0.73 |
| 12-02 | Gp4 | g.chr3:97806122G>T   | Missense Mutation | OR5AC2   | p.V36F   | olfactory receptor, famil23 (0.00)  | 18 (0.50)  | 1.33 |
| 12-02 | Gp4 | g.chr12:29630384G>T  | Nonsense Mutation | OVCH1    | p.S379*  | ovochoymase 1 95 (0.00)             | 27 (0.19)  | 0.49 |
| 12-02 | Gp4 | g.chr8:101724959G>A  | Missense Mutation | PABPC1   | p.A266V  | poly(A) binding protein.129 (0.01)  | 36 (0.17)  | 0.44 |
| 12-02 | Gp4 | g.chr20:3903910G>A   | Missense Mutation | PANK2    | p.G561E  | pantothenate kinase 2 18 (0.00)     | 23 (0.22)  | 0.58 |
| 12-02 | Gp4 | g.chr14:20825866C>G  | Silent            | PARP2    | p.L541L  | poly (ADP-ribose) poly145 (0.00)    | 28 (0.25)  | 0.67 |
| 12-02 | Gp4 | g.chr7:154790397C>G  | Missense Mutation | PAXIP1   | p.G60A   | PAX interacting (with tr109 (0.00)  | 55 (0.15)  | 0.39 |
| 12-02 | Gp4 | g.chr5:140711891C>T  | Missense Mutation | PCDHGA1  | p.S547F  | protocadherin gamma st48 (0.00)     | 164 (0.15) | 0.39 |
| 12-02 | Gp4 | g.chr7:82579281T>A   | Silent            | PCLO     | p.A3541A | piccolo presynaptic cyto49 (0.00)   | 35 (0.37)  | 0.99 |
| 12-02 | Gp4 | g.chr1:144915505T>C  | Silent            | PDE4DIP  | p.E777E  | phosphodiesterase 4D ir62 (0.00)    | 49 (0.16)  | 0.44 |
| 12-02 | Gp4 | g.chr16:15120546A>T  | Missense Mutation | PDXDC1   | p.Q396L  | pyridoxal-dependent dec25 (0.00)    | 10 (0.50)  | 1.33 |
| 12-02 | Gp4 | g.chr3:130427220T>A  | Missense Mutation | PIK3R4   | p.K816N  | phosphoinositide-3-kina54 (0.00)    | 12 (0.42)  | 1.11 |
| 12-02 | Gp4 | g.chr7:6754237G>T    | RNA               | PMS2CL   |          | PMS2 C-terminal like p:67 (0.00)    | 51 (0.18)  | 0.47 |
| 12-02 | Gp4 | g.chr11:70221163G>A  | Silent            | PPFIA1   | p.L1093L | protein tyrosine phospho33 (0.00)   | 13 (0.46)  | 1.57 |
| 12-02 | Gp4 | g.chr12:81733001G>A  | Missense Mutation | PPFIA2   | p.R836C  | protein tyrosine phospho94 (0.00)   | 36 (0.22)  | 0.59 |
| 12-02 | Gp4 | g.chr12:63060964G>A  | Missense Mutation | PPM1H    | p.P464L  | protein phosphatase, Mg31 (0.00)    | 16 (0.44)  | 1.17 |
| 12-02 | Gp4 | g.chr14:102375951G>T | Missense Mutation | PPP2R5C  | p.A393S  | protein phosphatase 2, r23 (0.00)   | 38 (0.16)  | 0.42 |
| 12-02 | Gp4 | g.chr14:63888807A>G  | Silent            | PPP2R5E  | p.S120S  | protein phosphatase 2, r66 (0.00)   | 34 (0.18)  | 0.47 |
| 12-02 | Gp4 | g.chr12:110989697C>T | Silent            | PPTC7    | p.T100T  | PTC7 protein phosphata37 (0.00)     | 27 (0.26)  | 0.69 |
| 12-02 | Gp4 | g.chr1:13695844C>A   | Missense Mutation | PRAMEF19 | p.S305I  | PRAME family membe140 (0.00)        | 40 (0.23)  | 0.60 |
| 12-02 | Gp4 | g.chr1:57161789C>A   | Missense Mutation | PRKAA2   | p.L249M  | protein kinase, AMP-ac191 (0.00)    | 28 (0.25)  | 0.67 |
| 12-02 | Gp4 | g.chr17:74326715G>A  | Nonsense Mutation | PRPSAP1  | p.Q166*  | phosphoribosyl pyropho51 (0.00)     | 32 (0.16)  | 0.53 |
| 12-02 | Gp4 | g.chr1:171486749T>C  | Silent            | PRRC2C   | p.D180D  | proline-rich coiled-coil :92 (0.00) | 33 (0.52)  | 1.37 |
| 12-02 | Gp4 | g.chr1:171510825G>A  | Missense Mutation | PRRC2C   | p.R1405Q | proline-rich coiled-coil :43 (0.00) | 21 (0.48)  | 1.27 |
| 12-02 | Gp4 | g.chr10:89707792C>A  | Intron            | PTEN     |          | phosphatase and tensin l48 (0.00)   | 30 (0.17)  | 0.44 |
| 12-02 | Gp4 | g.chr7:77239323C>T   | Intron            | PTPN12   |          | protein tyrosine phospho70 (0.00)   | 69 (0.17)  | 0.46 |
| 12-02 | Gp4 | g.chr11:48186036G>A  | Missense Mutation | PTPRJ    | p.R1275Q | protein tyrosine phospho23 (0.00)   | 32 (0.22)  | 0.58 |
| 12-02 | Gp4 | g.chr2:136396651G>A  | Missense Mutation | R3HDM1   | p.S337N  | R3H domain containing 220 (0.00)    | 45 (0.20)  | 0.53 |
| 12-02 | Gp4 | g.chr9:125760971T>C  | Missense Mutation | RABGAP1  | p.S434P  | RAB GTPase activating 51 (0.00)     | 96 (0.35)  | 1.65 |
| 12-02 | Gp4 | g.chr2:109352147C>T  | Missense Mutation | RANBP2   | p.H189Y  | RAN binding protein 2 255 (0.00)    | 108 (0.40) | 1.06 |
| 12-02 | Gp4 | g.chr2:109380572G>A  | Missense Mutation | RANBP2   | p.E1193K | RAN binding protein 2 34 (0.00)     | 25 (0.20)  | 0.53 |

|       |     |                     |                   |               |          |                                            |            |           |      |
|-------|-----|---------------------|-------------------|---------------|----------|--------------------------------------------|------------|-----------|------|
| 12-02 | Gp4 | g.chr3:25635044C>T  | Silent            | RARB          | p.F279F  | retinoic acid receptor, beta               | 100 (0.00) | 38 (0.53) | 1.40 |
| 12-02 | Gp4 | g.chr13:48963428C>G | Intron            | RB1           |          | retinoblastoma 1                           | 86 (0.00)  | 22 (0.23) | 0.61 |
| 12-02 | Gp4 | g.chr13:49029541T>A | Intron            | RB1           |          | retinoblastoma 1                           | 147 (0.00) | 32 (0.16) | 0.42 |
| 12-02 | Gp4 | g.chr4:57796227G>T  | Missense Mutation | REST          | p.K401N  | RE1-silencing transcript                   | 48 (0.00)  | 26 (0.23) | 0.62 |
| 12-02 | Gp4 | g.chr2:85577921C>T  | Silent            | RETSAT        | p.K193K  | retinol saturase (all-trans)               | 44 (0.00)  | 24 (0.29) | 0.59 |
| 12-02 | Gp4 | g.chr3:49735329C>A  | Missense Mutation | RNF123        | p.H118Q  | ring finger protein 123                    | 36 (0.00)  | 25 (0.24) | 0.43 |
| 12-02 | Gp4 | g.chr4:1066870A>T   | Missense Mutation | RNF212        | p.V229D  | ring finger protein 212                    | 24 (0.00)  | 22 (0.55) | 1.45 |
| 12-02 | Gp4 | g.chr17:78357548G>T | Silent            | RNF213        | p.V4763V | ring finger protein 213                    | 23 (0.00)  | 23 (0.22) | 0.73 |
| 12-02 | Gp4 | g.chr3:97957237C>T  | lincRNA           | RP11-325B23.2 |          |                                            | 116 (0.01) | 39 (0.38) | 1.03 |
| 12-02 | Gp4 | g.chr14:58751736C>T | RNA               | RP11-349A22.5 |          |                                            | 47 (0.00)  | 22 (0.27) | 0.73 |
| 12-02 | Gp4 | g.chr17:46952366G>T | RNA               | RP11-463M16.4 |          |                                            | 27 (0.00)  | 25 (0.32) | 0.85 |
| 12-02 | Gp4 | g.chr15:22332556C>T | RNA               | RP11-69H14.6  |          |                                            | 55 (0.00)  | 33 (0.39) | 1.39 |
| 12-02 | Gp4 | g.chr14:21792916G>T | Missense Mutation | RPGRIP1       | p.Q634H  | retinitis pigmentosa GTP-binding protein 1 | 112 (0.00) | 58 (0.29) | 0.78 |
| 12-02 | Gp4 | g.chr3:72430250A>T  | Intron            | RYBP          |          | RING1 and YY1 binding protein              | 104 (0.00) | 31 (0.35) | 0.95 |
| 12-02 | Gp4 | g.chr11:9834089C>A  | Missense Mutation | SBF2          | p.W1382L | SET binding factor 2                       | 28 (0.00)  | 35 (0.14) | 0.38 |
| 12-02 | Gp4 | g.chr12:52156321T>C | Missense Mutation | SCN8A         | p.L802P  | sodium channel, voltage-gated, type 8      | 33 (0.00)  | 27 (0.22) | 0.59 |
| 12-02 | Gp4 | g.chr1:169822878C>G | Silent            | SCYL3         | p.L735L  | SCY1-like 3 (S. cerevisiae)                | 67 (0.00)  | 20 (0.25) | 0.67 |
| 12-02 | Gp4 | g.chr4:76896991G>A  | Nonsense Mutation | SDAD1         | p.Q162*  | SDA1 domain containing protein             | 41 (0.00)  | 18 (0.28) | 0.55 |
| 12-02 | Gp4 | g.chr4:25160619C>T  | Silent            | SEPSECS       | p.R75R   | Sep (O-phosphoserine) phosphatase          | 108 (0.00) | 43 (0.21) | 0.56 |
| 12-02 | Gp4 | g.chr6:109323481C>A | Splice Site       | SESN1         | p.E115D  | sestrin 1                                  | 57 (0.00)  | 14 (0.36) | 0.95 |
| 12-02 | Gp4 | g.chr7:94259056C>T  | Silent            | SGCE          | p.G69G   | sarcoglycan, epsilon                       | 113 (0.00) | 19 (0.68) | 1.82 |
| 12-02 | Gp4 | g.chr3:72811696G>A  | Intron            | SHQ1          |          | SHQ1, H/ACA ribonucleoprotein              | 119 (0.00) | 19 (0.26) | 0.70 |
| 12-02 | Gp4 | g.chr19:52034515C>T | Missense Mutation | SIGLEC6       | p.R109K  | sialic acid binding Ig-like lectin 6       | 22 (0.00)  | 83 (0.11) | 0.39 |
| 12-02 | Gp4 | g.chr2:113405031G>A | Silent            | SLC20A1       | p.L155L  | solute carrier family 20 member 1          | 37 (0.03)  | 24 (0.42) | 0.78 |
| 12-02 | Gp4 | g.chr16:18875446T>A | Missense Mutation | SMG1          | p.E1124V | SMG1 phosphatidylinositol 3-kinase         | 69 (0.00)  | 31 (0.23) | 0.60 |
| 12-02 | Gp4 | g.chr16:12571627G>T | Nonsense Mutation | SNX29         | p.E697*  | sorting nexin 29                           | 84 (0.00)  | 46 (0.22) | 0.58 |
| 12-02 | Gp4 | g.chr2:201305478C>A | Silent            | SPATS2L       | p.I253I  | spermatogenesis associated protein 2L      | 74 (0.00)  | 23 (0.26) | 0.70 |
| 12-02 | Gp4 | g.chr1:16257403T>C  | Silent            | SPEN          | p.I1556I | spen family transcription factor           | 59 (0.00)  | 27 (0.19) | 0.49 |
| 12-02 | Gp4 | g.chr17:47724151G>A | Intron            | SPOP          |          | speckle-type POZ protein                   | 48 (0.00)  | 34 (0.18) | 0.47 |
| 12-02 | Gp4 | g.chr14:65246611C>T | Silent            | SPTB          | p.L1435L | spectrin, beta, erythrocyte                | 15 (0.00)  | 23 (0.30) | 0.81 |
| 12-02 | Gp4 | g.chr7:99780423T>C  | Silent            | STAG3         | p.D99D   | stromal antigen 3                          | 69 (0.00)  | 23 (0.22) | 0.58 |
| 12-02 | Gp4 | g.chr2:219540126C>T | Silent            | STK36         | p.L122L  | serine/threonine kinase                    | 62 (0.02)  | 57 (0.23) | 0.61 |
| 12-02 | Gp4 | g.chr13:37619400C>T | Silent            | SUPT20H       | p.R92R   | suppressor of Ty 20 homolog                | 33 (0.00)  | 14 (0.43) | 1.14 |
| 12-02 | Gp4 | g.chr6:10931677G>A  | Silent            | SYCP2L        | p.L546L  | synaptonemal complex protein 2L            | 33 (0.00)  | 16 (0.44) | 0.67 |
| 12-02 | Gp4 | g.chr14:64453263A>G | Silent            | SYNE2         | p.E747E  | spectrin repeat containing protein         | 62 (0.00)  | 41 (0.24) | 0.65 |

|       |     |                      |                   |         |           |                            |              |            |      |
|-------|-----|----------------------|-------------------|---------|-----------|----------------------------|--------------|------------|------|
| 12-02 | Gp4 | g.chr6:132874693C>A  | Missense Mutation | TAAR8   | p.P288T   | trace amine associated r   | 87 (0.00)    | 42 (0.17)  | 0.44 |
| 12-02 | Gp4 | g.chr12:11286236C>T  | Missense Mutation | TAS2R30 | p.C203Y   | taste receptor, type 2, m  | 128 (0.01)   | 42 (0.17)  | 0.44 |
| 12-02 | Gp4 | g.chr12:11286494A>G  | Missense Mutation | TAS2R30 | p.I117T   | taste receptor, type 2, m  | 105 (0.00)   | 49 (0.20)  | 0.54 |
| 12-02 | Gp4 | g.chr20:13463913G>T  | Missense Mutation | TASP1   | p.H316N   | taspase, threonine aspar   | 41 (0.00)    | 27 (0.22)  | 0.59 |
| 12-02 | Gp4 | g.chr8:124153142G>A  | Splice Site       | TBC1D31 |           | TBC1 domain family, r      | 52 (0.00)    | 26 (0.23)  | 0.62 |
| 12-02 | Gp4 | g.chr2:43797599C>A   | Missense Mutation | THADA   | p.Q705H   | thyroid adenoma associ     | 55 (0.00)    | 28 (0.18)  | 0.48 |
| 12-02 | Gp4 | g.chr4:159162721C>A  | Missense Mutation | TMEM144 | p.S288Y   | transmembrane protein      | 49 (0.00)    | 16 (0.44)  | 1.17 |
| 12-02 | Gp4 | g.chr14:93652732G>T  | Missense Mutation | TMEM251 | p.A38S    | transmembrane protein      | 103 (0.00)   | 31 (0.16)  | 0.43 |
| 12-02 | Gp4 | g.chr1:25810707C>A   | Silent            | TMEM57  | p.R419R   | transmembrane protein      | 29 (0.00)    | 29 (0.17)  | 0.46 |
| 12-02 | Gp4 | g.chr11:117984061C>T | Missense Mutation | TMPRSS4 | p.A274V   | transmembrane protease     | 21 (0.00)    | 21 (0.48)  | 1.27 |
| 12-02 | Gp4 | g.chr1:173013078C>T  | Splice Site       | TNFSF18 |           | tumor necrosis factor (li  | 82 (0.00)    | 23 (0.30)  | 0.81 |
| 12-02 | Gp4 | g.chr3:170811651C>T  | Missense Mutation | TNIK    | p.E900K   | TRAF2 and NCK intera       | 95 (0.00)    | 111 (0.14) | 0.54 |
| 12-02 | Gp4 | g.chr4:189063507G>A  | Silent            | TRIML1  | p.Q202Q   | tripartite motif family-li | 26 (0.00)    | 41 (0.15)  | 0.39 |
| 12-02 | Gp4 | g.chr8:116599540C>A  | Missense Mutation | TRPS1   | p.E796D   | trichorhinophalangeal sy   | 16 (0.00)    | 13 (0.62)  | 1.64 |
| 12-02 | Gp4 | g.chr9:100372670G>A  | Missense Mutation | TSTD2   | p.P265S   | thiosulfate sulfurtransfe  | 95 (0.00)    | 69 (0.12)  | 0.49 |
| 12-02 | Gp4 | g.chr6:167754522C>T  | Silent            | TTLL2   | p.D378D   | tubulin tyrosine ligase-li | 76 (0.00)    | 42 (0.14)  | 0.38 |
| 12-02 | Gp4 | g.chr2:179393363G>A  | Silent            | TTN     | p.I35705I | titin                      | 44 (0.00)    | 34 (0.15)  | 0.39 |
| 12-02 | Gp4 | g.chr2:179500795G>A  | Missense Mutation | TTN     | p.R13835W | titin                      | 144 (0.00)   | 26 (0.27)  | 0.72 |
| 12-02 | Gp4 | g.chr2:179599232T>A  | Missense Mutation | TTN     | p.S5107C  | titin                      | 178 (0.00)   | 56 (0.20)  | 0.52 |
| 12-02 | Gp4 | g.chr6:112393229G>T  | Missense Mutation | TUBE1   | p.T382N   | tubulin, epsilon 1         | 108 (0.00)   | 30 (0.33)  | 0.89 |
| 12-02 | Gp4 | g.chr18:9887013C>G   | Missense Mutation | TXNDC2  | p.I179M   | thioredoxin domain con     | 26 (0.00)    | 25 (0.32)  | 0.85 |
| 12-02 | Gp4 | g.chr12:104715056C>T | Missense Mutation | TXNRD1  | p.H205Y   | thioredoxin reductase 1    | 41 (0.00)    | 29 (0.17)  | 0.46 |
| 12-02 | Gp4 | g.chr21:43838522C>A  | Missense Mutation | UBASH3A | p.L246I   | ubiquitin associated and   | 20 (0.00)    | 85 (0.13)  | 0.44 |
| 12-02 | Gp4 | g.chr7:43988316C>A   | Missense Mutation | UBE2D4  | p.P95Q    | ubiquitin-conjugating er   | 58 (0.02)    | 14 (0.57)  | 1.52 |
| 12-02 | Gp4 | g.chr15:43258468T>A  | Missense Mutation | UBR1    | p.I1492F  | ubiquitin protein ligase   | 136 (0.00)   | 22 (0.23)  | 0.61 |
| 12-02 | Gp4 | g.chr2:234628188G>A  | Missense Mutation | UGT1A4  | p.R241K   | UDP glucuronosyltransf     | 44 (0.00)    | 73 (0.21)  | 0.55 |
| 12-02 | Gp4 | g.chr2:234669531C>A  | Missense Mutation | UGT1A8  | p.H200N   | UDP glucuronosyltransf     | 49 (0.00)    | 23 (0.30)  | 0.81 |
| 12-02 | Gp4 | g.chr4:69434083C>A   | Missense Mutation | UGT2B17 | p.K40N    | UDP glucuronosyltransf     | 129 (0.00)   | 48 (0.21)  | 0.56 |
| 12-02 | Gp4 | g.chr1:12342880C>T   | Missense Mutation | VPS13D  | p.P1574L  | vacuolar protein sorting   | 37 (0.00)    | 14 (0.57)  | 1.52 |
| 12-02 | Gp4 | g.chr13:42442517T>A  | Missense Mutation | VWA8    | p.T393S   | von Willebrand factor A    | 72 (0.00)    | 39 (0.21)  | 0.55 |
| 12-02 | Gp4 | g.chr18:30093566C>A  | RNA               | WBP11P1 |           | WW domain binding pr       | 105 (0.00)   | 10 (0.50)  | 0.59 |
| 12-02 | Gp4 | g.chr7:73105305G>T   | Missense Mutation | WBSCR22 | p.R141L   | Williams Beuren syndro     | 30 (0.00)    | 31 (0.16)  | 0.43 |
| 12-02 | Gp4 | g.chr19:38384843G>T  | Missense Mutation | WDR87   | p.F461L   | WD repeat domain           | 87 32 (0.00) | 33 (0.18)  | 0.48 |
| 12-02 | Gp4 | g.chr12:1009828C>A   | Missense Mutation | WNK1    | p.P2212Q  | WNK lysine deficient p     | 22 (0.00)    | 21 (0.24)  | 0.63 |
| 12-02 | Gp4 | g.chr12:989939C>T    | Missense Mutation | WNK1    | p.P962L   | WNK lysine deficient p     | 65 (0.00)    | 33 (0.24)  | 0.65 |



|       |     |                      |                   |            |          |                                    |            |      |
|-------|-----|----------------------|-------------------|------------|----------|------------------------------------|------------|------|
| 12-02 | Gp4 | g.chr1:180853191G>T  | Missense Mutation | XPR1       | p.A694S  | xenotropic and polytrop 40 (0.00)  | 18 (0.39)  | 1.04 |
| 12-02 | Gp4 | g.chr14:75277082C>T  | Silent            | YLPM1      | p.D1023D | YLP motif containing 1 160 (0.00)  | 29 (0.17)  | 0.46 |
| 12-02 | Gp4 | g.chr12:57397637G>C  | Missense Mutation | ZBTB39     | p.N355K  | zinc finger and BTB do37 (0.00)    | 30 (0.23)  | 0.62 |
| 12-02 | Gp4 | g.chr9:129594970A>T  | Missense Mutation | ZBTB43     | p.Q61L   | zinc finger and BTB do23 (0.00)    | 69 (0.13)  | 0.61 |
| 12-02 | Gp4 | g.chr11:110035901C>A | Missense Mutation | ZC3H12C    | p.F698L  | zinc finger CCCH-type 159 (0.00)   | 77 (0.16)  | 0.42 |
| 12-02 | Gp4 | g.chr2:207175052G>A  | Missense Mutation | ZDBF2      | p.A1934T | zinc finger, DBF-type c122 (0.00)  | 53 (0.23)  | 0.60 |
| 12-02 | Gp4 | g.chr2:207175563C>G  | Nonsense Mutation | ZDBF2      | p.S2104* | zinc finger, DBF-type c166 (0.00)  | 31 (0.26)  | 0.69 |
| 12-02 | Gp4 | g.chr8:124266157C>A  | Missense Mutation | ZHX1       | p.S677I  | zinc fingers and homeod 88 (0.01)  | 18 (0.28)  | 0.74 |
| 12-02 | Gp4 | g.chr3:178742869T>C  | Missense Mutation | ZMAT3      | p.Q269R  | zinc finger, matrin-type 73 (0.00) | 49 (0.10)  | 0.38 |
| 12-02 | Gp4 | g.chr19:44681660C>A  | Missense Mutation | ZNF226     | p.H749N  | zinc finger protein 226 79 (0.00)  | 26 (0.35)  | 0.92 |
| 12-02 | Gp4 | g.chr6:109107803G>T  | RNA               | ZNF259P1   |          | zinc finger protein 259 130 (0.00) | 41 (0.20)  | 0.52 |
| 12-02 | Gp4 | g.chr9:109736502C>A  | Silent            | ZNF462     | p.L1166L | zinc finger protein 462 39 (0.00)  | 21 (0.24)  | 1.01 |
| 12-02 | Gp4 | g.chr9:116731399T>C  | Silent            | ZNF618     | p.A12A   | zinc finger protein 618 51 (0.00)  | 63 (0.10)  | 0.40 |
| 12-02 | Gp4 | g.chr19:52400204C>A  | Missense Mutation | ZNF649     | p.V15L   | zinc finger protein 649 116 (0.00) | 30 (0.27)  | 0.71 |
| 12-02 | Gp4 | g.chr9:40774498G>A   | Silent            | ZNF658     | p.N259N  | zinc finger protein 658 41 (0.00)  | 51 (0.16)  | 0.62 |
| 12-02 | Gp4 | g.chr9:130207384G>A  | Missense Mutation | ZNF79      | p.G469S  | zinc finger protein 79 24 (0.00)   | 40 (0.12)  | 0.58 |
| 12-02 | Gp4 | g.chr19:53056508T>A  | Silent            | ZNF808     | p.I113I  | zinc finger protein 808 110 (0.00) | 48 (0.33)  | 0.89 |
| 12-02 | Gp4 | g.chr19:53056549C>A  | Missense Mutation | ZNF808     | p.A127E  | zinc finger protein 808 161 (0.00) | 58 (0.34)  | 0.92 |
| 12-03 | Gp3 | g.chr12:9232276G>A   | Missense Mutation | A2M        | p.T997I  | alpha-2-macroglobulin 104 (0.00)   | 80 (0.23)  | 0.60 |
| 12-03 | Gp3 | g.chr12:53701348G>T  | Silent            | AAAS       | p.S522S  | achalasia, adrenocortica 21 (0.00) | 29 (0.17)  | 0.46 |
| 12-03 | Gp3 | g.chr12:53701398C>A  | Missense Mutation | AAAS       | p.A506S  | achalasia, adrenocortica 43 (0.00) | 45 (0.22)  | 0.59 |
| 12-03 | Gp3 | g.chr2:215843575C>A  | Missense Mutation | ABCA12     | p.D1644Y | ATP-binding cassette, s153 (0.00)  | 88 (0.43)  | 1.15 |
| 12-03 | Gp3 | g.chr7:48550702G>A   | Missense Mutation | ABCA13     | p.C4516Y | ATP-binding cassette, s140 (0.00)  | 149 (0.97) | 2.58 |
| 12-03 | Gp3 | g.chr19:1046228G>T   | Splice Site       | ABCA7      |          | ATP-binding cassette, s128 (0.00)  | 640 (0.14) | 0.38 |
| 12-03 | Gp3 | g.chr17:67031489C>A  | Missense Mutation | ABCA9      | p.W342C  | ATP-binding cassette, s115 (0.00)  | 29 (0.31)  | 0.83 |
| 12-03 | Gp3 | g.chr17:67031490C>A  | Missense Mutation | ABCA9      | p.W342L  | ATP-binding cassette, s115 (0.00)  | 30 (0.30)  | 0.80 |
| 12-03 | Gp3 | g.chr2:169850316C>G  | Missense Mutation | ABCB11     | p.G230R  | ATP-binding cassette, s141 (0.00)  | 26 (0.19)  | 0.51 |
| 12-03 | Gp3 | g.chr15:89728718C>T  | Silent            | ABHD2      | p.D262D  | abhydrolase domain con27 (0.00)    | 94 (0.53)  | 1.42 |
| 12-03 | Gp3 | g.chr15:89738481G>A  | Missense Mutation | ABHD2      | p.V369M  | abhydrolase domain con52 (0.00)    | 63 (0.24)  | 0.63 |
| 12-03 | Gp3 | g.chr9:133760977C>T  | Silent            | ABL1       | p.C1100C | ABL proto-oncogene 1, 24 (0.00)    | 136 (0.16) | 0.43 |
| 12-03 | Gp3 | g.chr9:133761021G>T  | Missense Mutation | ABL1       | p.S1115I | ABL proto-oncogene 1, 19 (0.00)    | 127 (0.24) | 0.63 |
| 12-03 | Gp3 | g.chr15:31093540G>T  | RNA               | AC004460.1 |          | 46 (0.02)                          | 549 (0.24) | 0.80 |
| 12-03 | Gp3 | g.chr19:52097529C>A  | Nonsense Mutation | AC018755.1 | p.E16*   | 21 (0.00)                          | 67 (0.27)  | 0.96 |
| 12-03 | Gp3 | g.chr17:20418719C>T  | RNA               | AC025627.9 |          | 31 (0.00)                          | 29 (0.59)  | 1.56 |
| 12-03 | Gp3 | g.chr3:10029647G>A   | RNA               | AC034193.5 |          | 24 (0.00)                          | 29 (0.45)  | 1.20 |

|       |     |                      |                   |            |          |                             |            |            |      |
|-------|-----|----------------------|-------------------|------------|----------|-----------------------------|------------|------------|------|
| 12-03 | Gp3 | g.chr3:194476404G>T  | lincRNA           | AC090505.6 |          |                             | 20 (0.00)  | 139 (0.14) | 0.38 |
| 12-03 | Gp3 | g.chr3:38167325C>A   | Missense Mutation | ACAA1      | p.A349S  | acetyl-CoA acyltransferase  | 55 (0.00)  | 63 (0.32)  | 0.59 |
| 12-03 | Gp3 | g.chr17:35632928C>G  | Missense Mutation | ACACA      | p.A236P  | acetyl-CoA carboxylase      | 109 (0.00) | 267 (0.37) | 0.98 |
| 12-03 | Gp3 | g.chr12:112184045C>T | Missense Mutation | ACAD10     | p.A738V  | acyl-CoA dehydrogenase      | 46 (0.00)  | 63 (0.19)  | 0.51 |
| 12-03 | Gp3 | g.chr9:19434989C>T   | Missense Mutation | ACER2      | p.T137M  | alkaline ceramidase 2       | 128 (0.00) | 264 (0.19) | 0.52 |
| 12-03 | Gp3 | g.chr1:55050454C>T   | Silent            | ACOT11     | p.L54L   | acyl-CoA thioesterase 1     | 24 (0.00)  | 89 (0.22)  | 0.60 |
| 12-03 | Gp3 | g.chr4:8398676C>G    | Missense Mutation | ACOX3      | p.E348D  | acyl-CoA oxidase 3, primary | 44 (0.00)  | 146 (0.23) | 0.60 |
| 12-03 | Gp3 | g.chr11:125547761C>A | Nonsense Mutation | ACRV1      | p.E162*  | acrosomal vesicle protein   | 45 (0.00)  | 21 (0.76)  | 2.03 |
| 12-03 | Gp3 | g.chr11:66330275G>A  | RNA               | ACTN3      |          | actinin, alpha 3 (gene/ps)  | 32 (0.00)  | 319 (0.20) | 0.73 |
| 12-03 | Gp3 | g.chr20:37400256G>T  | Missense Mutation | ACTR5      | p.A541S  | ARP5 actin-related protein  | 108 (0.00) | 323 (0.18) | 0.49 |
| 12-03 | Gp3 | g.chr5:33616134T>A   | Silent            | ADAMTS12   | p.I729I  | ADAM metalloproteinase      | 33 (0.00)  | 31 (0.19)  | 0.52 |
| 12-03 | Gp3 | g.chr5:33649724G>C   | Silent            | ADAMTS12   | p.L423L  | ADAM metalloproteinase      | 46 (0.00)  | 24 (0.33)  | 0.89 |
| 12-03 | Gp3 | g.chr10:72498603C>A  | Nonsense Mutation | ADAMTS14   | p.C538*  | ADAM metalloproteinase      | 29 (0.00)  | 300 (0.25) | 0.66 |
| 12-03 | Gp3 | g.chr1:150529111G>A  | Missense Mutation | ADAMTSL4   | p.G531R  | ADAMTS-like 4               | 25 (0.00)  | 381 (0.25) | 0.82 |
| 12-03 | Gp3 | g.chr21:46603337G>T  | Silent            | ADARB1     | p.L436L  | adenosine deaminase, R      | 18 (0.00)  | 20 (0.50)  | 1.89 |
| 12-03 | Gp3 | g.chr1:227174223G>T  | Missense Mutation | ADCK3      | p.D577Y  | AAF domain containing       | 20 (0.00)  | 94 (0.57)  | 1.53 |
| 12-03 | Gp3 | g.chr3:123071338G>C  | Missense Mutation | ADCY5      | p.Q42E   | adenylate cyclase 5         | 41 (0.00)  | 227 (0.31) | 0.64 |
| 12-03 | Gp3 | g.chr5:132228792C>A  | Missense Mutation | AFF4       | p.A776S  | AF4/FMR2 family, member     | 194 (0.00) | 68 (0.49)  | 1.29 |
| 12-03 | Gp3 | g.chr10:51748572G>T  | Nonsense Mutation | AGAP6      | p.E33*   | ArfGAP with GTPase domain   | 47 (0.00)  | 374 (0.41) | 1.08 |
| 12-03 | Gp3 | g.chr1:49100186G>T   | Silent            | AGBL4      | p.I310I  | ATP/GTP binding protein     | 50 (0.00)  | 56 (0.18)  | 0.48 |
| 12-03 | Gp3 | g.chr1:247040570G>T  | Missense Mutation | AHCTF1     | p.H934N  | AT hook containing protein  | 22 (0.00)  | 77 (0.16)  | 0.42 |
| 12-03 | Gp3 | g.chr14:105405701C>A | Missense Mutation | AHNAK2     | p.D361Y  | AHNAK nucleoprotein         | 35 (0.00)  | 25 (0.80)  | 2.13 |
| 12-03 | Gp3 | g.chr6:143457998C>T  | Silent            | AIG1       | p.I56I   | androgen-induced 1          | 17 (0.00)  | 119 (0.37) | 0.99 |
| 12-03 | Gp3 | g.chr6:143654546G>T  | Nonsense Mutation | AIG1       | p.E215*  | androgen-induced 1          | 34 (0.00)  | 44 (0.77)  | 2.06 |
| 12-03 | Gp3 | g.chr15:86225398C>T  | Missense Mutation | AKAP13     | p.P1708L | A kinase (PRKA) anchor      | 16 (0.00)  | 19 (0.37)  | 0.98 |
| 12-03 | Gp3 | g.chr15:86236564G>A  | Silent            | AKAP13     | p.K1786K | A kinase (PRKA) anchor      | 39 (0.00)  | 38 (0.97)  | 2.60 |
| 12-03 | Gp3 | g.chr19:15507988C>T  | Silent            | AKAP8L     | p.K503K  | A kinase (PRKA) anchor      | 44 (0.00)  | 52 (0.38)  | 1.32 |
| 12-03 | Gp3 | g.chr15:101427809G>T | Missense Mutation | ALDH1A3    | p.Q79H   | aldehyde dehydrogenase      | 25 (0.00)  | 204 (0.19) | 0.51 |
| 12-03 | Gp3 | g.chr3:125843285G>A  | Missense Mutation | ALDH1L1    | p.L614F  | aldehyde dehydrogenase      | 15 (0.00)  | 81 (0.17)  | 0.46 |
| 12-03 | Gp3 | g.chr2:3730654C>T    | Silent            | ALLC       | p.N167N  | allantoicase                | 36 (0.00)  | 182 (0.69) | 1.83 |
| 12-03 | Gp3 | g.chr2:73678225C>T   | Missense Mutation | ALMS1      | p.S1523L | Alstrom syndrome 1          | 16 (0.00)  | 26 (0.23)  | 0.62 |
| 12-03 | Gp3 | g.chr2:73679655G>A   | Missense Mutation | ALMS1      | p.V2000M | Alstrom syndrome 1          | 39 (0.00)  | 39 (0.44)  | 1.16 |
| 12-03 | Gp3 | g.chr1:110172024G>A  | Missense Mutation | AMPD2      | p.E646K  | adenosine monophosphate     | 25 (0.00)  | 73 (0.16)  | 0.44 |
| 12-03 | Gp3 | g.chr2:112636548C>T  | Splice Site       | ANAPC1     | p.E72K   | anaphase promoting complex  | 31 (0.00)  | 19 (0.47)  | 1.26 |
| 12-03 | Gp3 | g.chr4:25392602T>A   | Missense Mutation | ANAPC4     | p.S224T  | anaphase promoting complex  | 18 (0.00)  | 27 (0.22)  | 0.59 |

|       |     |                      |                   |            |          |                           |            |            |      |
|-------|-----|----------------------|-------------------|------------|----------|---------------------------|------------|------------|------|
| 12-03 | Gp3 | g.chr19:10204068G>T  | Missense Mutation | ANGPTL6    | p.D393E  | angiopoietin-like 6       | 18 (0.00)  | 47 (0.51)  | 1.36 |
| 12-03 | Gp3 | g.chr5:139908027T>C  | Silent            | ANKHD1     | p.N1832N | ankyrin repeat and KH c   | 82 (0.00)  | 72 (0.18)  | 0.48 |
| 12-03 | Gp3 | g.chr12:110466351C>T | Missense Mutation | ANKRD13A   | p.P327L  | ankyrin repeat domain 1   | 19 (0.00)  | 59 (0.61)  | 1.63 |
| 12-03 | Gp3 | g.chr4:73979530T>A   | Missense Mutation | ANKRD17    | p.L1460F | ankyrin repeat domain 1   | 69 (0.00)  | 46 (0.57)  | 1.51 |
| 12-03 | Gp3 | g.chr9:38595861C>T   | Silent            | ANKRD18A   | p.E492E  | ankyrin repeat domain 1   | 108 (0.00) | 107 (0.41) | 1.10 |
| 12-03 | Gp3 | g.chr10:90583080G>T  | Missense Mutation | ANKRD22    | p.P152H  | ankyrin repeat domain 2   | 68 (0.00)  | 366 (0.24) | 0.63 |
| 12-03 | Gp3 | g.chr21:14414971G>A  | RNA               | ANKRD30BP2 |          | ankyrin repeat domain 3   | 148 (0.00) | 37 (0.16)  | 0.43 |
| 12-03 | Gp3 | g.chr1:145561771G>A  | Missense Mutation | ANKRD35    | p.A487T  | ankyrin repeat domain 3   | 35 (0.00)  | 97 (0.15)  | 0.41 |
| 12-03 | Gp3 | g.chr2:89084116G>A   | RNA               | ANKRD36BP2 |          | ankyrin repeat domain 3   | 93 (0.00)  | 59 (0.58)  | 1.22 |
| 12-03 | Gp3 | g.chr2:96521530C>T   | Silent            | ANKRD36C   | p.Q1493Q | ankyrin repeat domain 3   | 55 (0.00)  | 44 (0.57)  | 1.52 |
| 12-03 | Gp3 | g.chr15:90335721G>A  | Silent            | ANPEP      | p.G774G  | alanyl (membrane) amir    | 30 (0.00)  | 75 (0.29)  | 0.78 |
| 12-03 | Gp3 | g.chr11:970258C>A    | Missense Mutation | AP2A2      | p.H76N   | adaptor-related protein c | 64 (0.00)  | 246 (0.18) | 0.48 |
| 12-03 | Gp3 | g.chr15:51289744G>A  | Silent            | AP4E1      | p.E856E  | adaptor-related protein c | 15 (0.00)  | 38 (0.16)  | 0.42 |
| 12-03 | Gp3 | g.chr12:99061338G>A  | Silent            | APAF1      | p.P470P  | apoptotic peptidase activ | 53 (0.00)  | 32 (0.88)  | 2.33 |
| 12-03 | Gp3 | g.chr5:139940648A>G  | Missense Mutation | APBB3      | p.Y289H  | amyloid beta (A4) precu   | 55 (0.00)  | 56 (0.57)  | 1.52 |
| 12-03 | Gp3 | g.chr1:159558435C>T  | Silent            | APCS       | p.D203D  | amyloid P component, s    | 19 (0.05)  | 14 (0.79)  | 1.66 |
| 12-03 | Gp3 | g.chr22:39496332C>A  | Missense Mutation | APOBEC3H   | p.R17S   | apolipoprotein B mRNA     | 16 (0.00)  | 84 (0.20)  | 0.54 |
| 12-03 | Gp3 | g.chr22:36122931G>T  | Silent            | APOL5      | p.T272T  | apolipoprotein L, 5       | 91 (0.00)  | 46 (0.30)  | 0.81 |
| 12-03 | Gp3 | g.chr11:47196609G>T  | Missense Mutation | ARFGAP2    | p.S146Y  | ADP-ribosylation factor   | 15 (0.00)  | 63 (0.68)  | 1.82 |
| 12-03 | Gp3 | g.chr22:43218332C>T  | Silent            | ARFGAP3    | p.A252A  | ADP-ribosylation factor   | 71 (0.00)  | 75 (0.16)  | 0.43 |
| 12-03 | Gp3 | g.chr15:32929968G>C  | Missense Mutation | ARHGAP11A  | p.R809S  | Rho GTPase activating j   | 23 (0.00)  | 24 (0.54)  | 1.78 |
| 12-03 | Gp3 | g.chr10:24908855G>A  | Nonsense Mutation | ARHGAP21   | p.Q657*  | Rho GTPase activating j   | 39 (0.00)  | 41 (0.71)  | 1.89 |
| 12-03 | Gp3 | g.chr17:12819263G>T  | Nonsense Mutation | ARHGAP44   | p.E108*  | Rho GTPase activating j   | 30 (0.00)  | 14 (0.36)  | 0.95 |
| 12-03 | Gp3 | g.chr17:12847463C>A  | Missense Mutation | ARHGAP44   | p.P271T  | Rho GTPase activating j   | 15 (0.00)  | 25 (0.32)  | 0.85 |
| 12-03 | Gp3 | g.chr8:1812554C>T    | Missense Mutation | ARHGEF10   | p.T166I  | Rho guanine nucleotide    | 35 (0.00)  | 25 (0.24)  | 0.64 |
| 12-03 | Gp3 | g.chr1:156909367C>T  | Missense Mutation | ARHGEF11   | p.A1357T | Rho guanine nucleotide    | 27 (0.00)  | 32 (0.75)  | 1.58 |
| 12-03 | Gp3 | g.chr11:73063887C>G  | Missense Mutation | ARHGEF17   | p.P1095A | Rho guanine nucleotide    | 17 (0.00)  | 76 (0.20)  | 0.53 |
| 12-03 | Gp3 | g.chr11:73066629C>A  | Missense Mutation | ARHGEF17   | p.L1169I | Rho guanine nucleotide    | 23 (0.00)  | 16 (0.31)  | 0.83 |
| 12-03 | Gp3 | g.chr11:73066916G>A  | Missense Mutation | ARHGEF17   | p.R1194H | Rho guanine nucleotide    | 132 (0.00) | 264 (0.15) | 0.39 |
| 12-03 | Gp3 | g.chr12:101790300T>C | Missense Mutation | ARL1       | p.E114G  | ADP-ribosylation factor   | 45 (0.00)  | 22 (0.45)  | 1.21 |
| 12-03 | Gp3 | g.chr6:109274326A>G  | Missense Mutation | ARMC2      | p.I563V  | armadillo repeat contain  | 31 (0.00)  | 70 (0.67)  | 1.05 |
| 12-03 | Gp3 | g.chr19:4891568C>T   | Silent            | ARRDC5     | p.E173E  | arrestin domain containi  | 19 (0.00)  | 40 (0.12)  | 0.45 |
| 12-03 | Gp3 | g.chr22:51063793G>T  | Missense Mutation | ARSA       | p.P437H  | arylsulfatase A           | 25 (0.00)  | 252 (0.17) | 0.65 |
| 12-03 | Gp3 | g.chr1:155408730G>A  | Missense Mutation | ASH1L      | p.A1739V | ash1 (absent, small, or h | 28 (0.00)  | 21 (0.24)  | 0.50 |
| 12-03 | Gp3 | g.chr22:26830448C>G  | Missense Mutation | ASPHD2     | p.I289M  | aspartate beta-hydroxyl   | 40 (0.00)  | 26 (0.35)  | 0.92 |

|       |     |                      |                   |         |          |                                                                                    |            |      |
|-------|-----|----------------------|-------------------|---------|----------|------------------------------------------------------------------------------------|------------|------|
| 12-03 | Gp3 | g.chr9:133364742C>G  | Silent            | ASS1    | p.G287G  | argininosuccinate synthase 40 (0.00)                                               | 80 (0.41)  | 1.10 |
| 12-03 | Gp3 | g.chr2:96789818G>T   | Missense Mutation | ASTL    | p.A356E  | astacin-like metallo-endopeptidase 19 (0.00)                                       | 57 (0.33)  | 0.89 |
| 12-03 | Gp3 | g.chr18:31323689A>G  | Missense Mutation | ASXL3   | p.I1293V | additional sex combs like 48 (0.00)                                                | 25 (0.28)  | 0.75 |
| 12-03 | Gp3 | g.chr18:31324919C>T  | Nonsense Mutation | ASXL3   | p.Q1703* | additional sex combs like 34 (0.00)                                                | 54 (0.70)  | 1.88 |
| 12-03 | Gp3 | g.chr17:29161625A>G  | Missense Mutation | ATAD5   | p.K176E  | ATPase family, AAA domain 46 (0.00)                                                | 28 (0.25)  | 0.67 |
| 12-03 | Gp3 | g.chr1:161833037T>C  | Missense Mutation | ATF6    | p.Y552H  | activating transcription factor 150 (0.00)                                         | 27 (0.41)  | 1.09 |
| 12-03 | Gp3 | g.chr11:108142092G>A | Silent            | ATM     | p.R1012R | ATM serine/threonine kinase 27 (0.00)                                              | 35 (0.23)  | 0.61 |
| 12-03 | Gp3 | g.chr11:108163472T>A | Silent            | ATM     | p.V1521V | ATM serine/threonine kinase 47 (0.00)                                              | 69 (0.16)  | 0.43 |
| 12-03 | Gp3 | g.chr4:94751026G>C   | Missense Mutation | ATOH1   | p.G317R  | atonal homolog 1 (Drosophila) 48 (0.00)                                            | 182 (0.24) | 0.63 |
| 12-03 | Gp3 | g.chr15:25940161C>A  | Missense Mutation | ATP10A  | p.A965S  | ATPase, class V, type 10 16 (0.00)                                                 | 108 (0.37) | 1.22 |
| 12-03 | Gp3 | g.chr18:43664288T>C  | Missense Mutation | ATP5A1  | p.K541R  | ATP synthase, H+ transporting, mitochondrial F1F0 complex, alpha subunit 18 (0.00) | 23 (0.26)  | 0.70 |
| 12-03 | Gp3 | g.chr13:26436522C>A  | Silent            | ATP8A2  | p.P1053P | ATPase, aminophospholipid-transporting, cytoplasmic, 39 (0.00)                     | 14 (0.43)  | 1.14 |
| 12-03 | Gp3 | g.chr1:154300325C>T  | Missense Mutation | ATP8B2  | p.S17F   | ATPase, aminophospholipid-transporting, cytoplasmic, 31 (0.00)                     | 106 (0.62) | 1.31 |
| 12-03 | Gp3 | g.chr17:17921958G>T  | Missense Mutation | ATPAF2  | p.L259M  | ATP synthase mitochondrial F1F0 complex, 15 (0.00)                                 | 203 (0.33) | 0.89 |
| 12-03 | Gp3 | g.chr17:8110573C>T   | Missense Mutation | AURKB   | p.V107I  | aurora kinase B 18 (0.00)                                                          | 75 (0.29)  | 0.78 |
| 12-03 | Gp3 | g.chr11:66114009G>T  | Silent            | B3GNT1  | p.P336P  | UDP-GlcNAc:betaGalactosyltransferase 33 (0.00)                                     | 218 (0.12) | 0.44 |
| 12-03 | Gp3 | g.chr3:182987909G>T  | Missense Mutation | B3GNT5  | p.R108I  | UDP-GlcNAc:betaGalactosyltransferase 38 (0.00)                                     | 60 (0.80)  | 2.13 |
| 12-03 | Gp3 | g.chr1:44456019G>T   | Missense Mutation | B4GALT2 | p.G340W  | UDP-Gal:betaGlcNAc transferase 125 (0.00)                                          | 90 (0.21)  | 0.56 |
| 12-03 | Gp3 | g.chr15:40758173C>G  | Silent            | BAHD1   | p.G729G  | bromo adjacent homolog 73 (0.00)                                                   | 366 (0.27) | 0.73 |
| 12-03 | Gp3 | g.chr14:76012836C>T  | Missense Mutation | BATF    | p.A67V   | basic leucine zipper transcription factor 30 (0.00)                                | 118 (0.16) | 0.43 |
| 12-03 | Gp3 | g.chr12:56995476C>A  | Missense Mutation | BAZ2A   | p.D1309Y | bromodomain adjacent to zinc finger domain 188 (0.00)                              | 110 (0.29) | 0.78 |
| 12-03 | Gp3 | g.chr12:56995513G>A  | Silent            | BAZ2A   | p.D1296D | bromodomain adjacent to zinc finger domain 176 (0.00)                              | 99 (0.34)  | 0.92 |
| 12-03 | Gp3 | g.chr19:49309921G>A  | Silent            | BCAT2   | p.P51P   | branched chain aminotransferase 49 (0.00)                                          | 549 (0.15) | 0.53 |
| 12-03 | Gp3 | g.chr14:96707517G>T  | Silent            | BDKRB2  | p.L284L  | bradykinin receptor B2 21 (0.00)                                                   | 37 (0.19)  | 0.50 |
| 12-03 | Gp3 | g.chr10:60549449C>T  | Missense Mutation | BICC1   | p.T268I  | BicC family RNA binding protein 40 (0.00)                                          | 25 (0.68)  | 1.81 |
| 12-03 | Gp3 | g.chr2:32726915C>T   | Missense Mutation | BIRC6   | p.P3056L | baculoviral IAP repeat containing 29 (0.00)                                        | 11 (0.73)  | 1.94 |
| 12-03 | Gp3 | g.chr15:91272171G>T  | Intron            | BLM     |          | Bloom syndrome, RecQ 20 (0.00)                                                     | 30 (0.23)  | 0.62 |
| 12-03 | Gp3 | g.chr15:91290088G>A  | Intron            | BLM     |          | Bloom syndrome, RecQ 172 (0.00)                                                    | 245 (0.60) | 1.60 |
| 12-03 | Gp3 | g.chr15:91305040A>T  | Intron            | BLM     |          | Bloom syndrome, RecQ 66 (0.00)                                                     | 30 (0.23)  | 0.62 |
| 12-03 | Gp3 | g.chr15:91335591C>T  | Intron            | BLM     |          | Bloom syndrome, RecQ 86 (0.00)                                                     | 121 (0.21) | 0.57 |
| 12-03 | Gp3 | g.chr10:133787448C>T | Splice Site       | BNIP3   |          | BCL2/adenovirus E1B 129 (0.00)                                                     | 92 (0.15)  | 0.41 |
| 12-03 | Gp3 | g.chr7:134363641C>A  | Missense Mutation | BPGM    | p.P213H  | 2,3-bisphosphoglycerate 15 (0.00)                                                  | 40 (0.47)  | 1.27 |
| 12-03 | Gp3 | g.chr17:41200633G>A  | Intron            | BRCA1   |          | breast cancer 1, early onset 40 (0.00)                                             | 66 (0.26)  | 0.48 |
| 12-03 | Gp3 | g.chr17:41203400C>T  | Intron            | BRCA1   |          | breast cancer 1, early onset 63 (0.00)                                             | 73 (0.37)  | 0.69 |
| 12-03 | Gp3 | g.chr17:41213189T>C  | Intron            | BRCA1   |          | breast cancer 1, early onset 81 (0.00)                                             | 24 (0.42)  | 0.78 |

|       |     |                      |                   |          |          |                           |            |            |      |
|-------|-----|----------------------|-------------------|----------|----------|---------------------------|------------|------------|------|
| 12-03 | Gp3 | g.chr17:41236912T>C  | Intron            | BRCA1    |          | breast cancer 1, early on | 66 (0.00)  | 23 (0.48)  | 0.89 |
| 12-03 | Gp3 | g.chr17:41237033C>A  | Intron            | BRCA1    |          | breast cancer 1, early on | 48 (0.00)  | 19 (0.95)  | 1.77 |
| 12-03 | Gp3 | g.chr17:41259688G>T  | Intron            | BRCA1    |          | breast cancer 1, early on | 34 (0.00)  | 55 (0.24)  | 0.44 |
| 12-03 | Gp3 | g.chr13:32904642G>C  | Intron            | BRCA2    |          | breast cancer 2, early on | 24 (0.00)  | 37 (0.92)  | 2.45 |
| 12-03 | Gp3 | g.chr13:32928700G>A  | Intron            | BRCA2    |          | breast cancer 2, early on | 168 (0.01) | 73 (0.96)  | 2.56 |
| 12-03 | Gp3 | g.chr22:50217813G>A  | Silent            | BRD1     | p.I51I   | bromodomain containin     | 37 (0.00)  | 269 (0.20) | 0.78 |
| 12-03 | Gp3 | g.chr1:177250157G>A  | Silent            | BRINP2   | p.R615R  | bone morphogenetic pro    | 55 (0.00)  | 134 (0.14) | 0.38 |
| 12-03 | Gp3 | g.chr10:93751924G>T  | Missense Mutation | BTAF1    | p.R968I  | BTAF1 RNA polymera        | 22 (0.00)  | 40 (0.30)  | 0.80 |
| 12-03 | Gp3 | g.chr15:40509749G>C  | Missense Mutation | BUB1B    | p.D911H  | BUB1 mitotic checkpoi     | 94 (0.00)  | 46 (0.20)  | 0.52 |
| 12-03 | Gp3 | g.chr15:40509808T>C  | Silent            | BUB1B    | p.F930F  | BUB1 mitotic checkpoi     | 86 (0.00)  | 53 (0.30)  | 0.81 |
| 12-03 | Gp3 | g.chr15:40509855C>T  | Missense Mutation | BUB1B    | p.S946F  | BUB1 mitotic checkpoi     | 70 (0.00)  | 41 (0.49)  | 1.30 |
| 12-03 | Gp3 | g.chr10:50533032G>A  | Silent            | C10orf71 | p.K814K  | chromosome 10 open re     | 33 (0.00)  | 14 (0.36)  | 0.95 |
| 12-03 | Gp3 | g.chr10:124712521G>A | Silent            | C10orf88 | p.N64N   | chromosome 10 open re     | 15 (0.00)  | 72 (0.39)  | 1.04 |
| 12-03 | Gp3 | g.chr11:66571578G>T  | Nonsense Mutation | C11orf80 | p.E100*  | chromosome 11 open re     | 43 (0.00)  | 73 (0.58)  | 2.13 |
| 12-03 | Gp3 | g.chr11:66581364C>A  | Missense Mutation | C11orf80 | p.P138H  | chromosome 11 open re     | 22 (0.00)  | 64 (0.83)  | 3.07 |
| 12-03 | Gp3 | g.chr14:105460983C>T | Missense Mutation | C14orf79 | p.R289C  | chromosome 14 open re     | 42 (0.00)  | 142 (0.19) | 0.51 |
| 12-03 | Gp3 | g.chr1:169792600C>G  | Missense Mutation | C1orf112 | p.L279V  | chromosome 1 open rea     | 25 (0.00)  | 119 (0.40) | 1.08 |
| 12-03 | Gp3 | g.chr1:150255890C>A  | Silent            | C1orf51  | p.S71S   |                           | 55 (0.00)  | 193 (0.42) | 1.41 |
| 12-03 | Gp3 | g.chr1:197874965G>A  | Missense Mutation | C1orf53  | p.V102M  | chromosome 1 open rea     | 131 (0.00) | 30 (0.40)  | 1.07 |
| 12-03 | Gp3 | g.chr5:34043179G>A   | Missense Mutation | C1QTNF3  | p.P18S   | C1q and tumor necrosis    | 91 (0.00)  | 27 (0.19)  | 0.49 |
| 12-03 | Gp3 | g.chr11:73745033C>A  | Missense Mutation | C2CD3    | p.A2058S | C2 calcium-dependent d    | 102 (0.00) | 33 (0.33)  | 0.89 |
| 12-03 | Gp3 | g.chr2:29296413C>A   | Missense Mutation | C2orf71  | p.D239Y  | chromosome 2 open rea     | 55 (0.00)  | 188 (0.22) | 0.58 |
| 12-03 | Gp3 | g.chr2:29296446C>A   | Nonsense Mutation | C2orf71  | p.E228*  | chromosome 2 open rea     | 47 (0.00)  | 207 (0.17) | 0.45 |
| 12-03 | Gp3 | g.chr4:128938627G>A  | Missense Mutation | C4orf29  | p.G194R  | chromosome 4 open rea     | 74 (0.00)  | 151 (0.36) | 0.95 |
| 12-03 | Gp3 | g.chr4:71024361C>A   | Missense Mutation | C4orf40  | p.A131D  |                           | 57 (0.00)  | 59 (0.27)  | 0.72 |
| 12-03 | Gp3 | g.chr5:37244595G>A   | Missense Mutation | C5orf42  | p.S151F  | chromosome 5 open rea     | 94 (0.00)  | 57 (0.25)  | 0.65 |
| 12-03 | Gp3 | g.chr5:40958231G>T   | Missense Mutation | C7       | p.D453Y  | complement component      | 57 (0.00)  | 117 (0.70) | 1.87 |
| 12-03 | Gp3 | g.chr9:35043869G>A   | Missense Mutation | C9orf131 | p.E415K  | chromosome 9 open rea     | 15 (0.00)  | 57 (0.49)  | 1.31 |
| 12-03 | Gp3 | g.chr8:86249288C>A   | Silent            | CA1      | p.L80L   | carbonic anhydrase I      | 54 (0.00)  | 106 (0.69) | 1.84 |
| 12-03 | Gp3 | g.chr9:140904511C>T  | Silent            | CACNA1B  | p.N714N  | calcium channel, volta    | 15 (0.00)  | 218 (0.17) | 0.44 |
| 12-03 | Gp3 | g.chr12:2717735C>T   | Missense Mutation | CACNA1C  | p.R1159C | calcium channel, volta    | 15 (0.00)  | 64 (0.22)  | 0.58 |
| 12-03 | Gp3 | g.chr22:40068279G>A  | Missense Mutation | CACNA1I  | p.V1539M | calcium channel, volta    | 97 (0.00)  | 19 (0.42)  | 1.12 |
| 12-03 | Gp3 | g.chr12:49220620C>G  | Missense Mutation | CACNB3   | p.L325V  | calcium channel, volta    | 50 (0.00)  | 101 (0.15) | 0.40 |
| 12-03 | Gp3 | g.chr2:27454967G>A   | Missense Mutation | CAD      | p.M777I  | carbamoyl-phosphate sy    | 49 (0.00)  | 37 (0.92)  | 2.45 |
| 12-03 | Gp3 | g.chr2:27455093G>A   | Splice Site       | CAD      |          | carbamoyl-phosphate sy    | 50 (0.00)  | 36 (0.89)  | 2.37 |

|       |     |                      |                   |          |         |                                            |            |      |
|-------|-----|----------------------|-------------------|----------|---------|--------------------------------------------|------------|------|
| 12-03 | Gp3 | g.chr11:115049409G>A | Silent            | CADM1    | p.L389L | cell adhesion molecule 138 (0.00)          | 28 (0.57)  | 1.52 |
| 12-03 | Gp3 | g.chr3:85014467C>T   | Intron            | CADM2    |         | cell adhesion molecule 224 (0.00)          | 18 (0.33)  | 0.89 |
| 12-03 | Gp3 | g.chr3:85117354C>A   | Intron            | CADM2    |         | cell adhesion molecule 227 (0.00)          | 13 (0.38)  | 1.03 |
| 12-03 | Gp3 | g.chr3:85252347C>T   | Intron            | CADM2    |         | cell adhesion molecule 221 (0.00)          | 34 (0.18)  | 0.47 |
| 12-03 | Gp3 | g.chr3:85438297C>T   | Intron            | CADM2    |         | cell adhesion molecule 2100 (0.00)         | 253 (0.28) | 0.75 |
| 12-03 | Gp3 | g.chr3:85553090G>A   | Intron            | CADM2    |         | cell adhesion molecule 250 (0.00)          | 17 (0.59)  | 1.57 |
| 12-03 | Gp3 | g.chr3:85611350A>G   | Intron            | CADM2    |         | cell adhesion molecule 225 (0.00)          | 26 (0.23)  | 0.62 |
| 12-03 | Gp3 | g.chr3:85660780G>T   | Intron            | CADM2    |         | cell adhesion molecule 269 (0.00)          | 20 (0.25)  | 0.67 |
| 12-03 | Gp3 | g.chr3:85763408C>T   | Intron            | CADM2    |         | cell adhesion molecule 2121 (0.00)         | 25 (0.32)  | 0.85 |
| 12-03 | Gp3 | g.chr3:85800359G>A   | Intron            | CADM2    |         | cell adhesion molecule 249 (0.00)          | 135 (0.37) | 0.99 |
| 12-03 | Gp3 | g.chr3:85827052C>A   | Intron            | CADM2    |         | cell adhesion molecule 257 (0.00)          | 30 (0.17)  | 0.44 |
| 12-03 | Gp3 | g.chr3:86064622G>A   | Intron            | CADM2    |         | cell adhesion molecule 235 (0.00)          | 43 (0.21)  | 0.56 |
| 12-03 | Gp3 | g.chr10:105215306C>A | Nonsense Mutation | CALHM1   | p.E252* | calcium homeostasis mc 21 (0.00)           | 186 (0.22) | 0.57 |
| 12-03 | Gp3 | g.chr15:68491943C>A  | Missense Mutation | CALML4   | p.M80I  | calmodulin-like 4 26 (0.00)                | 177 (0.31) | 0.83 |
| 12-03 | Gp3 | g.chr3:49898725G>A   | Silent            | CAMKV    | p.N150N | CaM kinase-like vesicle 16 (0.00)          | 189 (0.23) | 0.62 |
| 12-03 | Gp3 | g.chr1:40527459C>A   | Missense Mutation | CAP1     | p.A90D  | CAP, adenylate cyclase-41 (0.00)           | 132 (0.70) | 1.86 |
| 12-03 | Gp3 | g.chr11:64978313G>A  | Silent            | CAPN1    | p.L696L | calpain 1, (mu/I) large s 36 (0.00)        | 229 (0.59) | 2.19 |
| 12-03 | Gp3 | g.chr19:36633202C>A  | Splice Site       | CAPNS1   | p.S70R  | calpain, small subunit 1 27 (0.00)         | 137 (0.16) | 0.43 |
| 12-03 | Gp3 | g.chr13:111296779A>T | Missense Mutation | CARS2    | p.F457I | cysteinyl-tRNA synthetase 22 (0.00)        | 35 (0.14)  | 0.38 |
| 12-03 | Gp3 | g.chr10:115489176C>T | Silent            | CASP7    | p.T263T | caspase 7, apoptosis-related 24 (0.00)     | 94 (0.96)  | 2.55 |
| 12-03 | Gp3 | g.chr3:121973109C>A  | Silent            | CASR     | p.R25R  | calcium-sensing receptor 23 (0.00)         | 22 (0.95)  | 2.55 |
| 12-03 | Gp3 | g.chr11:65790440G>A  | Missense Mutation | CATSPER1 | p.R437W | cation channel, sperm-associated 15 (0.00) | 54 (0.19)  | 0.69 |
| 12-03 | Gp3 | g.chr19:45293302C>T  | Missense Mutation | CBLC     | p.T320I | Cbl proto-oncogene C, 120 (0.00)           | 111 (0.26) | 0.70 |
| 12-03 | Gp3 | g.chr19:14034152C>A  | Missense Mutation | CC2D1A   | p.P550T | coiled-coil and C2 domain 16 (0.00)        | 236 (0.11) | 0.40 |
| 12-03 | Gp3 | g.chr1:52826803G>A   | Splice Site       | CC2D1B   | p.T107M | coiled-coil and C2 domain 20 (0.00)        | 157 (0.17) | 0.44 |
| 12-03 | Gp3 | g.chr9:131600404C>T  | Missense Mutation | CCBL1    | p.E122K | cysteine conjugate-beta 97 (0.00)          | 81 (0.54)  | 1.45 |
| 12-03 | Gp3 | g.chr7:31617838C>G   | Silent            | CCDC129  | p.A228A | coiled-coil domain containing 49 (0.00)    | 72 (0.64)  | 1.70 |
| 12-03 | Gp3 | g.chr17:79638778C>G  | Missense Mutation | CCDC137  | p.Q168E | coiled-coil domain containing 15 (0.00)    | 110 (0.25) | 0.91 |
| 12-03 | Gp3 | g.chr2:179742714C>A  | Nonsense Mutation | CCDC141  | p.E626* | coiled-coil domain containing 34 (0.00)    | 39 (0.51)  | 1.37 |
| 12-03 | Gp3 | g.chr2:170537558G>A  | Nonsense Mutation | CCDC173  | p.R85*  | coiled-coil domain containing 75 (0.00)    | 57 (0.16)  | 0.42 |
| 12-03 | Gp3 | g.chr1:159860329G>A  | Silent            | CCDC19   | p.G71G  | 103 (0.00)                                 | 63 (0.71)  | 1.51 |
| 12-03 | Gp3 | g.chr17:42761312G>A  | Missense Mutation | CCDC43   | p.L74F  | coiled-coil domain containing 18 (0.00)    | 15 (0.33)  | 0.89 |
| 12-03 | Gp3 | g.chr3:56628052A>T   | Missense Mutation | CCDC66   | p.H467L | coiled-coil domain containing 37 (0.00)    | 33 (0.21)  | 0.57 |
| 12-03 | Gp3 | g.chr17:34304676G>C  | Missense Mutation | CCL16    | p.P97A  | chemokine (C-C motif) 21 (0.00)            | 34 (0.26)  | 0.71 |
| 12-03 | Gp3 | g.chr10:42928724G>A  | RNA               | CCNYL2   |         | cyclin Y-like 2 29 (0.00)                  | 11 (0.45)  | 1.21 |

|       |     |                     |                   |          |          |                             |              |            |      |
|-------|-----|---------------------|-------------------|----------|----------|-----------------------------|--------------|------------|------|
| 12-03 | Gp3 | g.chr10:42928727G>A | RNA               | CCNYL2   |          | cyclin Y-like 2             | 29 (0.00)    | 11 (0.45)  | 1.21 |
| 12-03 | Gp3 | g.chr17:38711666G>A | Silent            | CCR7     | p.Y155Y  | chemokine (C-C motif)       | 35 (0.00)    | 35 (0.40)  | 1.07 |
| 12-03 | Gp3 | g.chr12:7556307C>T  | Missense Mutation | CD163L1  | p.G421E  | CD163 molecule-like 1       | 18 (0.00)    | 10 (0.60)  | 1.60 |
| 12-03 | Gp3 | g.chr17:72537783C>A | Missense Mutation | CD300C   | p.R207I  | CD300c molecule             | 29 (0.00)    | 110 (0.71) | 1.89 |
| 12-03 | Gp3 | g.chr11:60885884T>A | Missense Mutation | CD5      | p.L111Q  | CD5 molecule                | 25 (0.00)    | 201 (0.21) | 0.42 |
| 12-03 | Gp3 | g.chr3:121822515A>G | Missense Mutation | CD86     | p.K68R   | CD86 molecule               | 15 (0.00)    | 13 (0.46)  | 1.23 |
| 12-03 | Gp3 | g.chr11:64594624G>A | Silent            | CDC42BPG | p.D1429D | CDC42 binding protein       | 16 (0.00)    | 496 (0.17) | 0.61 |
| 12-03 | Gp3 | g.chr22:19471492G>A | Silent            | CDC45    | p.G150G  | cell division cycle 45      | 51 (0.00)    | 35 (0.46)  | 1.22 |
| 12-03 | Gp3 | g.chr1:91967349G>A  | Missense Mutation | CDC7     | p.G26S   | cell division cycle 7       | 126 (0.00)   | 209 (0.22) | 0.57 |
| 12-03 | Gp3 | g.chr16:66413301G>T | Missense Mutation | CDH5     | p.A21S   | cadherin 5, type 2 (vascul) | 34 (0.00)    | 236 (0.17) | 0.45 |
| 12-03 | Gp3 | g.chr10:85971996G>T | Nonsense Mutation | CDHR1    | p.E539*  | cadherin-related family     | 44 (0.02)    | 39 (0.21)  | 0.55 |
| 12-03 | Gp3 | g.chr5:176017140G>A | Missense Mutation | CDHR2    | p.A1090T | cadherin-related family     | 142 (0.00)   | 255 (0.15) | 0.41 |
| 12-03 | Gp3 | g.chr1:1581160G>A   | Nonsense Mutation | CDK11B   | p.Q122*  | cyclin-dependent kinase     | 397 (0.00)   | 691 (0.17) | 0.44 |
| 12-03 | Gp3 | g.chr11:67274909G>T | Silent            | CDK2AP2  | p.V80V   | cyclin-dependent kinase     | 21 (0.00)    | 76 (0.13)  | 0.49 |
| 12-03 | Gp3 | g.chr17:30815524G>A | Missense Mutation | CDK5R1   | p.E296K  | cyclin-dependent kinase     | 76 (0.00)    | 145 (0.35) | 0.94 |
| 12-03 | Gp3 | g.chr20:31973458G>T | Missense Mutation | CDK5RAP1 | p.Q292K  | CDK5 regulatory subun       | 33 (0.00)    | 27 (0.19)  | 0.49 |
| 12-03 | Gp3 | g.chr9:123307991C>G | Splice Site       | CDK5RAP2 |          | CDK5 regulatory subun       | 22 (0.00)    | 10 (0.50)  | 1.33 |
| 12-03 | Gp3 | g.chr12:12870966C>A | Missense Mutation | CDKN1B   | p.Q65K   | cyclin-dependent kinase     | 22 (0.00)    | 64 (0.17)  | 0.46 |
| 12-03 | Gp3 | g.chr6:4892219C>T   | Silent            | CDYL     | p.L99L   | chromodomain protein,       | 39 (0.00)    | 69 (0.26)  | 0.70 |
| 12-03 | Gp3 | g.chr19:43093649C>T | Silent            | CEACAM8  | p.A221A  | carcinoembryonic antigen    | 26 (0.00)    | 15 (0.67)  | 1.78 |
| 12-03 | Gp3 | g.chr2:37454720G>A  | Missense Mutation | CEBPZ    | p.T539I  | CCAAT/enhancer binding      | 50 (0.00)    | 34 (0.21)  | 0.55 |
| 12-03 | Gp3 | g.chr22:18028002T>C | Missense Mutation | CECR2    | p.S845P  | cat eye syndrome chrom      | 24 (0.00)    | 60 (0.17)  | 0.44 |
| 12-03 | Gp3 | g.chr22:18029103G>T | Missense Mutation | CECR2    | p.G1212W | cat eye syndrome chrom      | 36 (0.00)    | 80 (0.17)  | 0.47 |
| 12-03 | Gp3 | g.chr1:109794243C>A | Silent            | CELSR2   | p.V514V  | cadherin, EGF LAG sev       | 64 (0.00)    | 50 (0.60)  | 1.60 |
| 12-03 | Gp3 | g.chr1:109795490T>C | Missense Mutation | CELSR2   | p.V930A  | cadherin, EGF LAG sev       | 19 (0.00)    | 71 (0.14)  | 0.38 |
| 12-03 | Gp3 | g.chr3:48691351G>T  | Nonsense Mutation | CELSR3   | p.C1746* | cadherin, EGF LAG sev       | 79 (0.00)    | 353 (0.16) | 0.42 |
| 12-03 | Gp3 | g.chr1:179966068C>A | Missense Mutation | CEP350   | p.P259Q  | centrosomal protein         | 35028 (0.00) | 15 (0.67)  | 1.78 |
| 12-03 | Gp3 | g.chr1:111725522C>T | Silent            | CEPT1    | p.P316P  | choline/ethanolamine pl     | 64 (0.00)    | 76 (0.25)  | 0.48 |
| 12-03 | Gp3 | g.chr19:4408937G>A  | Silent            | CHAF1A   | p.K47K   | chromatin assembly fact     | 43 (0.00)    | 68 (0.34)  | 1.22 |
| 12-03 | Gp3 | g.chr1:6206355G>A   | Silent            | CHD5     | p.P573P  | chromodomain helicase       | 31 (0.00)    | 292 (0.17) | 0.46 |
| 12-03 | Gp3 | g.chr1:6217433G>T   | Intron            | CHD5     |          | chromodomain helicase       | 33 (0.00)    | 65 (0.26)  | 0.70 |
| 12-03 | Gp3 | g.chr1:6235413A>G   | Intron            | CHD5     |          | chromodomain helicase       | 22 (0.00)    | 234 (0.15) | 0.41 |
| 12-03 | Gp3 | g.chr20:32438854T>C | Silent            | CHMP4B   | p.F155F  | charged multivesicular      | 187 (0.00)   | 97 (0.22)  | 0.58 |
| 12-03 | Gp3 | g.chr11:46407104G>A | Missense Mutation | CHRM4    | p.P335L  | cholinergic receptor, mu    | 24 (0.00)    | 360 (0.20) | 0.53 |
| 12-03 | Gp3 | g.chr2:233407730T>A | Missense Mutation | CHRNG    | p.I248N  | cholinergic receptor, nic   | 97 (0.00)    | 222 (0.21) | 0.55 |

|       |     |                      |                   |          |          |                                      |            |      |
|-------|-----|----------------------|-------------------|----------|----------|--------------------------------------|------------|------|
| 12-03 | Gp3 | g.chr16:57473196C>T  | Missense Mutation | CIAPIN1  | p.G70R   | cytokine induced apoptc 30 (0.00)    | 137 (0.16) | 0.43 |
| 12-03 | Gp3 | g.chr11:46774920C>T  | Missense Mutation | CKAP5    | p.R1666H | cytoskeleton associated 44 (0.00)    | 25 (0.88)  | 2.35 |
| 12-03 | Gp3 | g.chr16:74447519C>A  | Missense Mutation | CLEC18B  | p.G171V  | C-type lectin domain fa 20 (0.00)    | 60 (0.20)  | 0.53 |
| 12-03 | Gp3 | g.chr16:70211247G>T  | Missense Mutation | CLEC18C  | p.G107V  | C-type lectin domain fa 20 (0.00)    | 82 (0.17)  | 0.46 |
| 12-03 | Gp3 | g.chr1:25166356G>A   | Missense Mutation | CLIC4    | p.E141K  | chloride intracellular ch 42 (0.00)  | 35 (0.94)  | 2.51 |
| 12-03 | Gp3 | g.chr19:45489754G>A  | Nonsense Mutation | CLPTM1   | p.W224*  | cleft lip and palate assoc 53 (0.00) | 68 (0.18)  | 0.47 |
| 12-03 | Gp3 | g.chr18:72186248G>T  | Missense Mutation | CNDP2    | p.Q425H  | CNDP dipeptidase 2 (m 42 (0.00)      | 197 (0.22) | 0.60 |
| 12-03 | Gp3 | g.chr2:99013190G>A   | Missense Mutation | CNGA3    | p.M523I  | cyclic nucleotide gated c 37 (0.00)  | 67 (0.19)  | 0.52 |
| 12-03 | Gp3 | g.chr6:154762429C>A  | Missense Mutation | CNKSR3   | p.Q88H   | CNKSR family member 51 (0.00)        | 95 (0.22)  | 0.59 |
| 12-03 | Gp3 | g.chr10:104679750C>A | Missense Mutation | CNNM2    | p.P505T  | cyclin and CBS domain 37 (0.00)      | 33 (0.76)  | 2.02 |
| 12-03 | Gp3 | g.chr10:104836919C>G | Missense Mutation | CNNM2    | p.H870Q  | cyclin and CBS domain 37 (0.00)      | 243 (0.22) | 0.59 |
| 12-03 | Gp3 | g.chr2:97493599C>T   | Missense Mutation | CNNM3    | p.R551C  | cyclin and CBS domain 19 (0.00)      | 98 (0.19)  | 0.52 |
| 12-03 | Gp3 | g.chr11:99690407G>T  | Missense Mutation | CNTN5    | p.S63I   | contactin 5 75 (0.00)                | 34 (0.38)  | 1.02 |
| 12-03 | Gp3 | g.chr17:40850669G>T  | Missense Mutation | CNTNAP1  | p.G1299V | contactin associated pro 53 (0.00)   | 104 (0.21) | 0.39 |
| 12-03 | Gp3 | g.chr6:56044694G>T   | Missense Mutation | COL21A1  | p.L108I  | collagen, type XXI, alp 64 (0.00)    | 74 (0.35)  | 0.94 |
| 12-03 | Gp3 | g.chr9:116930954G>A  | Silent            | COL27A1  | p.S373S  | collagen, type XXVII, a 26 (0.00)    | 112 (0.23) | 0.62 |
| 12-03 | Gp3 | g.chr13:110864017G>A | Missense Mutation | COL4A1   | p.P149S  | collagen, type IV, alpha 15 (0.00)   | 31 (0.84)  | 2.24 |
| 12-03 | Gp3 | g.chr9:137622306C>T  | Silent            | COL5A1   | p.T383T  | collagen, type V, alpha 22 (0.00)    | 56 (0.55)  | 1.90 |
| 12-03 | Gp3 | g.chr3:130289760G>T  | Missense Mutation | COL6A6   | p.G834C  | collagen, type VI, alpha 122 (0.00)  | 14 (0.50)  | 1.33 |
| 12-03 | Gp3 | g.chr2:62227970C>T   | Silent            | COMMD1   | p.I105I  | copper metabolism (Mu 38 (0.00)      | 85 (0.52)  | 1.38 |
| 12-03 | Gp3 | g.chr3:149459389G>T  | Silent            | COMMD2   | p.L173L  | COMM domain contain 46 (0.00)        | 106 (0.34) | 0.91 |
| 12-03 | Gp3 | g.chr9:131095789G>T  | Missense Mutation | COQ4     | p.W221C  | coenzyme Q4 56 (0.00)                | 174 (0.19) | 0.51 |
| 12-03 | Gp3 | g.chr5:173380246C>A  | Missense Mutation | CPEB4    | p.Q645K  | cytoplasmic polyadenyl 48 (0.02)     | 141 (0.97) | 2.59 |
| 12-03 | Gp3 | g.chr12:94072767C>A  | Missense Mutation | CRADD    | p.L73I   | CASP2 and RIPK1 dom 70 (0.00)        | 73 (0.75)  | 2.01 |
| 12-03 | Gp3 | g.chr22:50315393C>A  | Silent            | CRELD2   | p.T192T  | cysteine-rich with EGF- 26 (0.00)    | 251 (0.14) | 0.53 |
| 12-03 | Gp3 | g.chr6:49665656C>A   | Silent            | CRISP2   | p.S144S  | cysteine-rich secretory p 59 (0.00)  | 28 (0.25)  | 0.67 |
| 12-03 | Gp3 | g.chr16:84911053T>A  | Nonsense Mutation | CRISPLD2 | p.L389*  | cysteine-rich secretory p 22 (0.00)  | 47 (0.26)  | 0.68 |
| 12-03 | Gp3 | g.chr4:5843070C>A    | Missense Mutation | CRMP1    | p.S257I  | collapsin response medi 64 (0.00)    | 232 (0.16) | 0.44 |
| 12-03 | Gp3 | g.chr22:27008142C>A  | Nonsense Mutation | CRYBB1   | p.E65*   | crystallin, beta B1 25 (0.00)        | 112 (0.21) | 0.55 |
| 12-03 | Gp3 | g.chr22:27008143G>A  | Silent            | CRYBB1   | p.F64F   | crystallin, beta B1 25 (0.00)        | 113 (0.20) | 0.54 |
| 12-03 | Gp3 | g.chr17:61987865G>T  | Nonsense Mutation | CSHL1    | p.S74*   | chorionic somatomamm 18 (0.00)       | 144 (0.28) | 0.74 |
| 12-03 | Gp3 | g.chr1:34006200A>G   | Missense Mutation | CSMD2    | p.Y3186H | CUB and Sushi multiple 26 (0.00)     | 37 (0.54)  | 1.44 |
| 12-03 | Gp3 | g.chr8:113353768G>C  | Missense Mutation | CSMD3    | p.T2197S | CUB and Sushi multiple 50 (0.00)     | 18 (0.89)  | 2.37 |
| 12-03 | Gp3 | g.chr17:80213332T>A  | Missense Mutation | CSNK1D   | p.K103N  | casein kinase 1, delta 30 (0.00)     | 182 (0.13) | 0.47 |
| 12-03 | Gp3 | g.chr11:33108599C>T  | Missense Mutation | CSTF3    | p.R577K  | cleavage stimulation fac 97 (0.00)   | 63 (0.40)  | 1.06 |



|       |     |                      |                   |              |          |                                                      |            |            |      |
|-------|-----|----------------------|-------------------|--------------|----------|------------------------------------------------------|------------|------------|------|
| 12-03 | Gp3 | g.chr17:8141356T>A   | Missense Mutation | CTC1         | p.R214W  | CTS telomere maintenance                             | 25 (0.00)  | 14 (0.43)  | 1.14 |
| 12-03 | Gp3 | g.chr5:56817007G>A   | RNA               | CTD-2023N9.1 |          |                                                      | 23 (0.00)  | 64 (0.95)  | 1.45 |
| 12-03 | Gp3 | g.chr5:138261016G>T  | Missense Mutation | CTNNA1       | p.D607Y  | catenin (cadherin-associated protein 1)              | 29 (0.00)  | 15 (0.67)  | 1.78 |
| 12-03 | Gp3 | g.chr11:57575702A>G  | Missense Mutation | CTNND1       | p.T671A  | catenin (cadherin-associated protein 1)              | 51 (0.00)  | 53 (0.19)  | 0.38 |
| 12-03 | Gp3 | g.chr11:88029405G>C  | Missense Mutation | CTSC         | p.A262G  | cathepsin C                                          | 46 (0.00)  | 92 (0.28)  | 0.75 |
| 12-03 | Gp3 | g.chr1:150772142C>A  | Missense Mutation | CTSK         | p.C221F  | cathepsin K                                          | 15 (0.00)  | 13 (0.62)  | 2.04 |
| 12-03 | Gp3 | g.chr6:43013099G>T   | Silent            | CUL7         | p.G968G  | cullin 7                                             | 36 (0.00)  | 199 (0.15) | 0.40 |
| 12-03 | Gp3 | g.chr17:61514738C>T  | Missense Mutation | CYB561       | p.M57I   | cytochrome b561                                      | 15 (0.00)  | 117 (0.15) | 0.41 |
| 12-03 | Gp3 | g.chr5:156727766G>T  | Missense Mutation | CYFIP2       | p.C118F  | cytoplasmic FMR1 interacting protein 2               | 27 (0.00)  | 76 (0.25)  | 0.67 |
| 12-03 | Gp3 | g.chr19:41352813G>A  | Silent            | CYP2A6       | p.D266D  | cytochrome P450, family 2A subfamily 6 member 1      | 50 (0.00)  | 14 (0.57)  | 1.52 |
| 12-03 | Gp3 | g.chr7:99264276C>T   | Missense Mutation | CYP3A5       | p.V157M  | cytochrome P450, family 3A subfamily 5 member 1      | 39 (0.00)  | 40 (0.97)  | 2.60 |
| 12-03 | Gp3 | g.chr7:99270203C>A   | Splice Site       | CYP3A5       | p.R106S  | cytochrome P450, family 3A subfamily 5 member 1      | 50 (0.00)  | 12 (0.75)  | 2.00 |
| 12-03 | Gp3 | g.chr1:47348888G>A   | RNA               | CYP4Z2P      |          | cytochrome P450, family 4Z subfamily 2 member 1      | 65 (0.00)  | 51 (0.18)  | 0.47 |
| 12-03 | Gp3 | g.chr6:39846004C>A   | Missense Mutation | DAAM2        | p.Q443K  | dishevelled associated armadillo domain containing 2 | 42 (0.00)  | 16 (0.38)  | 1.00 |
| 12-03 | Gp3 | g.chr9:124329988C>G  | Intron            | DAB2IP       |          | DAB2 interacting protein 1                           | 20 (0.00)  | 31 (0.16)  | 0.43 |
| 12-03 | Gp3 | g.chr9:124336181C>A  | Intron            | DAB2IP       |          | DAB2 interacting protein 1                           | 32 (0.00)  | 67 (0.36)  | 0.96 |
| 12-03 | Gp3 | g.chr9:124338196C>A  | Intron            | DAB2IP       |          | DAB2 interacting protein 1                           | 23 (0.00)  | 26 (0.58)  | 1.54 |
| 12-03 | Gp3 | g.chr9:124338526C>T  | Intron            | DAB2IP       |          | DAB2 interacting protein 1                           | 140 (0.00) | 28 (0.21)  | 0.57 |
| 12-03 | Gp3 | g.chr9:124362657C>T  | Intron            | DAB2IP       |          | DAB2 interacting protein 1                           | 26 (0.00)  | 132 (0.17) | 0.44 |
| 12-03 | Gp3 | g.chr9:124396080C>T  | Intron            | DAB2IP       |          | DAB2 interacting protein 1                           | 28 (0.00)  | 28 (0.36)  | 0.95 |
| 12-03 | Gp3 | g.chr9:124399239G>A  | Intron            | DAB2IP       |          | DAB2 interacting protein 1                           | 63 (0.00)  | 81 (0.28)  | 0.76 |
| 12-03 | Gp3 | g.chr9:124399257T>A  | Intron            | DAB2IP       |          | DAB2 interacting protein 1                           | 60 (0.02)  | 80 (0.30)  | 0.80 |
| 12-03 | Gp3 | g.chr9:124411424G>T  | Intron            | DAB2IP       |          | DAB2 interacting protein 1                           | 40 (0.00)  | 18 (0.28)  | 0.74 |
| 12-03 | Gp3 | g.chr9:124463308C>A  | Intron            | DAB2IP       |          | DAB2 interacting protein 1                           | 53 (0.00)  | 52 (0.62)  | 1.64 |
| 12-03 | Gp3 | g.chr9:124480364G>T  | Intron            | DAB2IP       |          | DAB2 interacting protein 1                           | 21 (0.00)  | 135 (0.15) | 0.40 |
| 12-03 | Gp3 | g.chr9:124499260A>G  | Intron            | DAB2IP       |          | DAB2 interacting protein 1                           | 41 (0.00)  | 87 (0.57)  | 1.53 |
| 12-03 | Gp3 | g.chr9:124528073G>A  | Intron            | DAB2IP       |          | DAB2 interacting protein 1                           | 36 (0.00)  | 58 (0.50)  | 1.33 |
| 12-03 | Gp3 | g.chr9:124539015G>A  | Intron            | DAB2IP       |          | DAB2 interacting protein 1                           | 35 (0.00)  | 140 (0.15) | 0.40 |
| 12-03 | Gp3 | g.chr1:159176066G>A  | Silent            | DARC         | p.Q279Q  | DARC                                                 | 93 (0.00)  | 223 (0.30) | 0.63 |
| 12-03 | Gp3 | g.chr19:14070662C>T  | Silent            | DCAF15       | p.G465G  | DDB1 and CUL4 associated factor 15                   | 19 (0.00)  | 194 (0.22) | 0.76 |
| 12-03 | Gp3 | g.chr14:69521518G>T  | Missense Mutation | DCAF5        | p.P629T  | DDB1 and CUL4 associated factor 5                    | 30 (0.00)  | 35 (0.23)  | 0.61 |
| 12-03 | Gp3 | g.chr11:6646869C>T   | Missense Mutation | DCHS1        | p.R2274H | dachsous cadherin-related domain containing 1        | 32 (0.00)  | 78 (0.36)  | 0.71 |
| 12-03 | Gp3 | g.chr3:36780099G>A   | Silent            | DCLK3        | p.L18L   | doublecortin-like kinase 3                           | 75 (0.00)  | 51 (0.49)  | 0.91 |
| 12-03 | Gp3 | g.chr10:115609914T>C | Missense Mutation | DCLRE1A      | p.D317G  | DNA cross-link repair factor 1                       | 39 (0.03)  | 10 (0.60)  | 1.60 |
| 12-03 | Gp3 | g.chr10:115612767C>A | Nonsense Mutation | DCLRE1A      | p.E59*   | DNA cross-link repair factor 1                       | 21 (0.00)  | 12 (0.42)  | 1.11 |

|       |     |                      |                     |         |          |                          |            |            |      |
|-------|-----|----------------------|---------------------|---------|----------|--------------------------|------------|------------|------|
| 12-03 | Gp3 | g.chr12:2061868G>T   | Missense Mutation   | DCP1B   | p.P287Q  | decapping mRNA 1B        | 147 (0.00) | 112 (0.74) | 1.98 |
| 12-03 | Gp3 | g.chr12:31256745A>G  | Missense Mutation   | DDX11   | p.H899R  | DEAD/H (Asp-Glu-Ala)     | 24 (0.00)  | 44 (0.16)  | 0.42 |
| 12-03 | Gp3 | g.chr5:134120077G>A  | Silent              | DDX46   | p.T396T  | DEAD (Asp-Glu-Ala-A)     | 32 (0.00)  | 74 (0.24)  | 0.65 |
| 12-03 | Gp3 | g.chr11:688452C>A    | Missense Mutation   | DEAF1   | p.R132S  | DEAF1 transcription fac  | 20 (0.00)  | 248 (0.38) | 1.01 |
| 12-03 | Gp3 | g.chr15:65960313G>A  | Nonsense Mutation   | DENND4A | p.Q1602* | DENN/MADD domain         | 15 (0.00)  | 32 (0.62)  | 1.67 |
| 12-03 | Gp3 | g.chr12:16189209C>A  | Missense Mutation   | DERA    | p.S265Y  | deoxyribose-phosphate    | 23 (0.00)  | 54 (0.48)  | 1.28 |
| 12-03 | Gp3 | g.chr22:20073458C>A  | De novo Start OutOf | DGCR8   |          | DGCR8 microprocessor     | 92 (0.00)  | 660 (0.10) | 0.40 |
| 12-03 | Gp3 | g.chr10:12131126C>A  | Missense Mutation   | DHTKD1  | p.P287T  | dehydrogenase E1 and t   | 30 (0.00)  | 86 (0.16)  | 0.43 |
| 12-03 | Gp3 | g.chr3:154041970C>T  | Missense Mutation   | DHX36   | p.R79K   | DEAH (Asp-Glu-Ala-H)     | 38 (0.00)  | 78 (0.28)  | 0.75 |
| 12-03 | Gp3 | g.chr17:57682898G>A  | Missense Mutation   | DHX40   | p.R688H  | DEAH (Asp-Glu-Ala-H)     | 41 (0.00)  | 52 (0.38)  | 1.03 |
| 12-03 | Gp3 | g.chr15:40657102C>T  | Missense Mutation   | DISP2   | p.L223F  | dispatched homolog 2 (I  | 34 (0.00)  | 84 (0.21)  | 0.57 |
| 12-03 | Gp3 | g.chr15:41223879C>T  | Silent              | DLL4    | p.R191R  | delta-like 4 (Drosophila | 59 (0.00)  | 91 (0.15)  | 0.41 |
| 12-03 | Gp3 | g.chr22:38934582C>A  | Missense Mutation   | DMC1    | p.A208S  | DNA meiotic recombina    | 17 (0.00)  | 15 (0.33)  | 0.89 |
| 12-03 | Gp3 | g.chr5:118468880G>A  | Missense Mutation   | DMXL1   | p.G457S  | Dmx-like 1               | 52 (0.00)  | 20 (0.35)  | 0.93 |
| 12-03 | Gp3 | g.chr5:118525494C>A  | Silent              | DMXL1   | p.S2409S | Dmx-like 1               | 52 (0.00)  | 88 (0.30)  | 0.79 |
| 12-03 | Gp3 | g.chr10:70196864C>T  | Missense Mutation   | DNA2    | p.R517K  | DNA replication helicase | 23 (0.00)  | 51 (0.86)  | 2.30 |
| 12-03 | Gp3 | g.chr12:124320011A>T | Missense Mutation   | DNAH10  | p.D1495V | dynein, axonemal, heav   | 50 (0.00)  | 39 (0.18)  | 0.48 |
| 12-03 | Gp3 | g.chr7:21621614G>A   | Missense Mutation   | DNAH11  | p.C562Y  | dynein, axonemal, heav   | 48 (0.00)  | 16 (0.31)  | 0.83 |
| 12-03 | Gp3 | g.chr7:21882318G>A   | Silent              | DNAH11  | p.L3616L | dynein, axonemal, heav   | 20 (0.00)  | 33 (0.85)  | 2.26 |
| 12-03 | Gp3 | g.chr17:7674092G>A   | Silent              | DNAH2   | p.Q1401Q | dynein, axonemal, heav   | 42 (0.00)  | 22 (0.36)  | 0.78 |
| 12-03 | Gp3 | g.chr17:7728046G>A   | Splice Site         | DNAH2   |          | dynein, axonemal, heav   | 21 (0.00)  | 27 (0.19)  | 0.40 |
| 12-03 | Gp3 | g.chr17:11593496C>T  | Missense Mutation   | DNAH9   | p.P1453S | dynein, axonemal, heav   | 66 (0.00)  | 24 (0.25)  | 0.67 |
| 12-03 | Gp3 | g.chr10:74103203C>A  | Silent              | DNAJB12 | p.L126L  | DnaJ (Hsp40) homolog,    | 16 (0.00)  | 18 (0.44)  | 1.19 |
| 12-03 | Gp3 | g.chr14:74154076G>T  | Missense Mutation   | DNAL1   | p.V127L  | dynein, axonemal, light  | 58 (0.00)  | 131 (0.16) | 0.43 |
| 12-03 | Gp3 | g.chr22:39176991C>A  | Missense Mutation   | DNAL4   | p.M31I   | dynein, axonemal, light  | 56 (0.00)  | 152 (0.18) | 0.47 |
| 12-03 | Gp3 | g.chr19:12986871G>A  | Missense Mutation   | DNASE2  | p.P339L  | deoxyribonuclease II, ly | 34 (0.00)  | 24 (0.46)  | 1.60 |
| 12-03 | Gp3 | g.chr9:131008723C>T  | Silent              | DNM1    | p.D574D  | dynamamin 1              | 27 (0.00)  | 170 (0.15) | 0.41 |
| 12-03 | Gp3 | g.chr1:172376923C>T  | Missense Mutation   | DNM3    | p.P841L  | dynamamin 3              | 17 (0.00)  | 44 (0.34)  | 0.91 |
| 12-03 | Gp3 | g.chr10:101659743G>A | Silent              | DNMBP   | p.L879L  | dynamamin binding protei | 22 (0.00)  | 20 (0.40)  | 1.07 |
| 12-03 | Gp3 | g.chr10:101667792C>T | Silent              | DNMBP   | p.S838S  | dynamamin binding protei | 47 (0.00)  | 13 (0.38)  | 1.03 |
| 12-03 | Gp3 | g.chr10:129231674C>T | Missense Mutation   | DOCK1   | p.S1660F | dedicator of cytokinesis | 65 (0.00)  | 22 (0.73)  | 1.94 |
| 12-03 | Gp3 | g.chr5:169141387T>C  | Missense Mutation   | DOCK2   | p.W115R  | dedicator of cytokinesis | 23 (0.00)  | 39 (0.21)  | 0.55 |
| 12-03 | Gp3 | g.chr9:377069G>T     | Missense Mutation   | DOCK8   | p.E698D  | dedicator of cytokinesis | 40 (0.00)  | 85 (0.26)  | 0.69 |
| 12-03 | Gp3 | g.chr21:37618314G>A  | Missense Mutation   | DOPEY2  | p.V1346I | dopey family member 2    | 61 (0.00)  | 384 (0.19) | 0.51 |
| 12-03 | Gp3 | g.chr11:118968223G>A | Missense Mutation   | DPAGT1  | p.S319F  | dolichyl-phosphate (UD   | 86 (0.00)  | 14 (0.86)  | 2.29 |

|       |     |                      |                   |          |          |                                     |            |      |
|-------|-----|----------------------|-------------------|----------|----------|-------------------------------------|------------|------|
| 12-03 | Gp3 | g.chr5:146785271C>T  | Missense Mutation | DPYSL3   | p.R238H  | dihydropyrimidinase-lik 25 (0.00)   | 28 (0.21)  | 0.57 |
| 12-03 | Gp3 | g.chr4:9784727C>A    | Silent            | DRD5     | p.I358I  | dopamine receptor D5 23 (0.00)      | 20 (0.30)  | 0.80 |
| 12-03 | Gp3 | g.chr22:31796709G>A  | Missense Mutation | DRG1     | p.G49D   | developmentally regulat 19 (0.00)   | 93 (0.26)  | 0.69 |
| 12-03 | Gp3 | g.chr5:31424540T>A   | Silent            | DROSHA   | p.P1085P | drosha, ribonuclease typ 83 (0.00)  | 78 (0.23)  | 0.62 |
| 12-03 | Gp3 | g.chr18:28991402C>A  | Nonsense Mutation | DSG4     | p.Y782*  | desmoglein 4 43 (0.00)              | 65 (0.42)  | 1.11 |
| 12-03 | Gp3 | g.chr6:56417846C>T   | Silent            | DST      | p.K5037K | dystonin 48 (0.00)                  | 41 (0.17)  | 0.46 |
| 12-03 | Gp3 | g.chr6:56470602C>T   | Missense Mutation | DST      | p.D2731N | dystonin 57 (0.00)                  | 72 (0.25)  | 0.67 |
| 12-03 | Gp3 | g.chr1:205119918T>A  | Missense Mutation | DSTYK    | p.D786V  | dual serine/threonine an 50 (0.00)  | 13 (0.38)  | 0.83 |
| 12-03 | Gp3 | g.chr6:15533626G>A   | Splice Site       | DTNBP1   | p.A171V  | dystrobrevin binding pr 79 (0.00)   | 95 (0.15)  | 0.39 |
| 12-03 | Gp3 | g.chr7:76112178G>C   | Missense Mutation | DTX2     | p.G208R  | deltex 2, E3 ubiquitin li 20 (0.00) | 301 (0.21) | 0.57 |
| 12-03 | Gp3 | g.chr15:45454558C>G  | Missense Mutation | DUOX1    | p.Q1411E | dual oxidase 1 51 (0.00)            | 195 (0.20) | 0.53 |
| 12-03 | Gp3 | g.chr15:45386378G>T  | Silent            | DUOX2    | p.A1539A | dual oxidase 2 17 (0.00)            | 25 (0.28)  | 0.75 |
| 12-03 | Gp3 | g.chr15:45408835G>T  | Silent            | DUOXA2   | p.V154V  | dual oxidase maturation 22 (0.00)   | 273 (0.21) | 0.57 |
| 12-03 | Gp3 | g.chr19:5790080C>T   | Missense Mutation | DUS3L    | p.R122K  | dihydrouridine synthase 21 (0.00)   | 140 (0.12) | 0.44 |
| 12-03 | Gp3 | g.chr1:167097166G>T  | Missense Mutation | DUSP27   | p.S933I  | dual specificity phospho 29 (0.00)  | 11 (0.45)  | 1.21 |
| 12-03 | Gp3 | g.chr11:102987413T>A | Missense Mutation | DYNC2H1  | p.S246T  | dynein, cytoplasmic 2, h 47 (0.00)  | 14 (0.57)  | 1.52 |
| 12-03 | Gp3 | g.chr1:43632541T>G   | Silent            | EBNA1BP2 | p.A221A  | EBNA1 binding protein 22 (0.00)     | 54 (0.17)  | 0.44 |
| 12-03 | Gp3 | g.chr1:21586870C>A   | Missense Mutation | ECE1     | p.S170I  | endothelin converting en 63 (0.00)  | 96 (0.25)  | 0.67 |
| 12-03 | Gp3 | g.chr20:62127356C>G  | Silent            | EEF1A2   | p.V59V   | eukaryotic translation el 19 (0.00) | 270 (0.26) | 0.68 |
| 12-03 | Gp3 | g.chr17:42953319C>T  | Silent            | EFTUD2   | p.E284E  | elongation factor Tu GT 91 (0.00)   | 108 (0.64) | 1.70 |
| 12-03 | Gp3 | g.chr7:55241619G>A   | Silent            | EGFR     | p.V644V  | epidermal growth factor 34 (0.00)   | 86 (0.36)  | 0.96 |
| 12-03 | Gp3 | g.chr10:64573853T>G  | Missense Mutation | EGR2     | p.Y182S  | early growth response 2 93 (0.00)   | 237 (0.19) | 0.51 |
| 12-03 | Gp3 | g.chr19:40030044C>A  | Nonsense Mutation | EID2     | p.E226*  | EP300 interacting inhibi 27 (0.00)  | 146 (0.15) | 0.56 |
| 12-03 | Gp3 | g.chr12:10658908C>A  | Missense Mutation | EIF2S3L  | p.P136H  | 112 (0.00)                          | 408 (0.30) | 0.81 |
| 12-03 | Gp3 | g.chr10:120795741C>T | Missense Mutation | EIF3A    | p.R1320Q | eukaryotic translation in 17 (0.00) | 98 (0.40)  | 1.06 |
| 12-03 | Gp3 | g.chr19:8038698G>A   | Missense Mutation | ELAVL1   | p.P114L  | ELAV like RNA bindin 21 (0.00)      | 124 (0.15) | 0.52 |
| 12-03 | Gp3 | g.chr20:45000036C>T  | Missense Mutation | ELMO2    | p.D586N  | engulfment and cell mot 75 (0.00)   | 47 (0.23)  | 0.62 |
| 12-03 | Gp3 | g.chr20:45022210G>A  | Silent            | ELMO2    | p.T50T   | engulfment and cell mot 60 (0.00)   | 85 (0.15)  | 0.41 |
| 12-03 | Gp3 | g.chr1:43830123C>A   | Missense Mutation | ELOVL1   | p.G164C  | ELOVL fatty acid elong 30 (0.00)    | 17 (0.35)  | 0.94 |
| 12-03 | Gp3 | g.chr14:24608635G>A  | Missense Mutation | EMC9     | p.P51L   | ER membrane protein c 65 (0.00)     | 90 (0.60)  | 1.25 |
| 12-03 | Gp3 | g.chr19:14883162G>A  | Missense Mutation | EMR2     | p.T116M  | egf-like module containi 37 (0.00)  | 30 (0.50)  | 1.33 |
| 12-03 | Gp3 | g.chr16:67698993C>T  | Missense Mutation | ENKD1    | p.R120H  | enkurin domain containi 98 (0.00)   | 50 (0.24)  | 0.64 |
| 12-03 | Gp3 | g.chr16:67698997C>T  | Missense Mutation | ENKD1    | p.E119K  | enkurin domain containi 98 (0.00)   | 49 (0.24)  | 0.65 |
| 12-03 | Gp3 | g.chr4:83372341A>G   | Missense Mutation | ENOPH1   | p.K111R  | enolase-phosphatase 1 21 (0.00)     | 11 (0.64)  | 1.70 |
| 12-03 | Gp3 | g.chr18:685969C>A    | Missense Mutation | ENOSF1   | p.M231I  | enolase superfamily me 43 (0.00)    | 38 (0.66)  | 1.75 |

|       |     |                      |                   |          |          |                           |            |            |      |
|-------|-----|----------------------|-------------------|----------|----------|---------------------------|------------|------------|------|
| 12-03 | Gp3 | g.chrX:129761981C>T  | Missense Mutation | ENOX2    | p.G522E  | ecto-NOX disulfide-thic   | 37 (0.00)  | 66 (0.86)  | 1.44 |
| 12-03 | Gp3 | g.chr4:111398046G>C  | Missense Mutation | ENPEP    | p.R159T  | glutamyl aminopeptidas    | 45 (0.00)  | 194 (0.15) | 0.41 |
| 12-03 | Gp3 | g.chr17:77710896C>T  | Silent            | ENPP7    | p.D361D  | ectonucleotide pyrophos   | 18 (0.00)  | 109 (0.15) | 0.39 |
| 12-03 | Gp3 | g.chr12:132514632G>A | Missense Mutation | EP400    | p.E1895K | E1A binding protein p4    | 47 (0.00)  | 211 (0.18) | 0.47 |
| 12-03 | Gp3 | g.chr3:96706794C>A   | Nonsense Mutation | EPHA6    | p.C357*  | EPH receptor A6           | 33 (0.00)  | 41 (0.85)  | 2.28 |
| 12-03 | Gp3 | g.chr8:144940958G>A  | Missense Mutation | EPPK1    | p.A2155V | epiplakin 1               | 47 (0.00)  | 522 (0.17) | 0.45 |
| 12-03 | Gp3 | g.chr1:220162088T>C  | Missense Mutation | EPRS     | p.I873M  | glutamyl-prolyl-tRNA s    | 25 (0.00)  | 15 (0.87)  | 2.31 |
| 12-03 | Gp3 | g.chr1:51873840C>T   | Silent            | EPS15    | p.Q480Q  | epidermal growth factor   | 30 (0.00)  | 78 (0.83)  | 2.22 |
| 12-03 | Gp3 | g.chr1:51910667G>T   | Missense Mutation | EPS15    | p.A283D  | epidermal growth factor   | 37 (0.00)  | 51 (0.25)  | 0.68 |
| 12-03 | Gp3 | g.chr17:27185164G>A  | Splice Site       | ERAL1    | p.R179R  | Era-like 12S mitochondi   | 20 (0.00)  | 35 (0.80)  | 2.13 |
| 12-03 | Gp3 | g.chr2:212426655C>A  | Silent            | ERBB4    | p.L820L  | v-erb-b2 avian erythrobl  | 95 (0.00)  | 40 (0.55)  | 1.47 |
| 12-03 | Gp3 | g.chr21:39756251C>A  | Intron            | ERG      |          | v-ets avian erythroblastc | 82 (0.00)  | 294 (0.20) | 0.54 |
| 12-03 | Gp3 | g.chr21:39771470C>A  | Intron            | ERG      |          | v-ets avian erythroblastc | 34 (0.00)  | 23 (0.35)  | 0.43 |
| 12-03 | Gp3 | g.chr21:39811206C>T  | Intron            | ERG      |          | v-ets avian erythroblastc | 48 (0.00)  | 20 (0.60)  | 0.73 |
| 12-03 | Gp3 | g.chr21:39811743C>T  | Intron            | ERG      |          | v-ets avian erythroblastc | 83 (0.00)  | 276 (0.37) | 0.45 |
| 12-03 | Gp3 | g.chr21:39844702C>A  | Intron            | ERG      |          | v-ets avian erythroblastc | 29 (0.00)  | 94 (0.46)  | 0.56 |
| 12-03 | Gp3 | g.chr21:39947736G>T  | Intron            | ERG      |          | v-ets avian erythroblastc | 94 (0.00)  | 25 (0.36)  | 0.44 |
| 12-03 | Gp3 | g.chr21:39985671C>A  | Intron            | ERG      |          | v-ets avian erythroblastc | 31 (0.00)  | 10 (0.60)  | 0.73 |
| 12-03 | Gp3 | g.chr21:39993026A>G  | Intron            | ERG      |          | v-ets avian erythroblastc | 20 (0.00)  | 28 (0.36)  | 0.44 |
| 12-03 | Gp3 | g.chr6:11105502T>C   | Silent            | ERVFRD-1 | p.L14L   | endogenous retrovirus g   | 26 (0.00)  | 68 (0.19)  | 0.51 |
| 12-03 | Gp3 | g.chr20:13695658C>A  | Missense Mutation | ESF1     | p.A807S  | ESF1, nucleolar pre-rR    | 54 (0.00)  | 16 (0.44)  | 1.17 |
| 12-03 | Gp3 | g.chr2:67630708C>T   | Silent            | ETAA1    | p.S298S  | Ewing tumor-associated    | 15 (0.00)  | 31 (0.32)  | 0.86 |
| 12-03 | Gp3 | g.chr22:29688580G>A  | Silent            | EWSR1    | p.Q388Q  | EWS RNA-binding prot      | 29 (0.00)  | 24 (0.21)  | 0.56 |
| 12-03 | Gp3 | g.chr1:40980709G>A   | Missense Mutation | EXO5     | p.E165K  | exonuclease 5             | 50 (0.00)  | 46 (0.72)  | 1.91 |
| 12-03 | Gp3 | g.chr8:72127952G>T   | Missense Mutation | EYA1     | p.P458T  | EYA transcriptional coa   | 36 (0.00)  | 39 (0.92)  | 2.46 |
| 12-03 | Gp3 | g.chr7:92207661C>T   | Missense Mutation | FAM133B  | p.G83E   | family with sequence si   | 36 (0.00)  | 66 (0.92)  | 2.46 |
| 12-03 | Gp3 | g.chr4:89711766G>A   | Silent            | FAM13A   | p.P354P  | family with sequence si   | 64 (0.00)  | 47 (0.32)  | 0.85 |
| 12-03 | Gp3 | g.chr4:89772331G>A   | Missense Mutation | FAM13A   | p.P283S  | family with sequence si   | 25 (0.00)  | 52 (0.23)  | 0.62 |
| 12-03 | Gp3 | g.chr10:15256153C>T  | Silent            | FAM171A1 | p.E478E  | family with sequence si   | 15 (0.00)  | 143 (0.26) | 0.69 |
| 12-03 | Gp3 | g.chr7:38725428C>G   | Missense Mutation | FAM183B  | p.E60Q   | family with sequence si   | 40 (0.00)  | 151 (0.39) | 1.04 |
| 12-03 | Gp3 | g.chr3:56658955G>A   | Missense Mutation | FAM208A  | p.H1407Y | family with sequence si   | 30 (0.00)  | 19 (0.53)  | 1.40 |
| 12-03 | Gp3 | g.chrX:34150275G>T   | Missense Mutation | FAM47A   | p.P41T   | family with sequence si   | 63 (0.02)  | 265 (0.25) | 0.42 |
| 12-03 | Gp3 | g.chr16:67575558C>T  | Missense Mutation | FAM65A   | p.P332L  | family with sequence si   | 22 (0.00)  | 81 (0.22)  | 0.59 |
| 12-03 | Gp3 | g.chr8:11990220G>A   | RNA               | FAM66D   |          | family with sequence si   | 125 (0.00) | 76 (0.24)  | 0.63 |
| 12-03 | Gp3 | g.chr16:5139188T>A   | Missense Mutation | FAM86A   | p.E271V  | family with sequence si   | 58 (0.00)  | 465 (0.12) | 0.41 |

|       |     |                      |                   |         |          |                           |              |            |      |
|-------|-----|----------------------|-------------------|---------|----------|---------------------------|--------------|------------|------|
| 12-03 | Gp3 | g.chr3:125643728C>G  | RNA               | FAM86JP |          | family with sequence sim  | 23 (0.00)    | 113 (0.14) | 0.38 |
| 12-03 | Gp3 | g.chr16:89805341C>T  | Silent            | FANCA   | p.L1403L | Fanconi anemia, comple    | 46 (0.00)    | 75 (0.15)  | 0.39 |
| 12-03 | Gp3 | g.chr2:242375932G>T  | Silent            | FARP2   | p.L379L  | FERM, RhoGEF and pl       | 45 (0.00)    | 237 (0.24) | 0.65 |
| 12-03 | Gp3 | g.chr2:170425723T>A  | Silent            | FASTKD1 | p.L139L  | FAST kinase domains 1     | 73 (0.00)    | 94 (0.44)  | 1.16 |
| 12-03 | Gp3 | g.chr4:187510146C>T  | Missense Mutation | FAT1    | p.S4456N | FAT atypical cadherin     | 1265 (0.00)  | 321 (0.41) | 1.10 |
| 12-03 | Gp3 | g.chr5:150885489G>T  | Silent            | FAT2    | p.P4229P | FAT atypical cadherin     | 245 (0.00)   | 341 (0.15) | 0.39 |
| 12-03 | Gp3 | g.chr5:107197503G>A  | Missense Mutation | FBXL17  | p.T277I  | F-box and leucine-rich    | 18 (0.00)    | 65 (0.51)  | 1.35 |
| 12-03 | Gp3 | g.chr5:15936651G>T   | Missense Mutation | FBXL7   | p.D278Y  | F-box and leucine-rich    | 40 (0.00)    | 363 (0.26) | 0.69 |
| 12-03 | Gp3 | g.chr1:224345289G>A  | Silent            | FBXO28  | p.R316R  | F-box protein 28          | 72 (0.00)    | 108 (0.18) | 0.47 |
| 12-03 | Gp3 | g.chr1:224345294C>A  | Missense Mutation | FBXO28  | p.A318E  | F-box protein 28          | 68 (0.00)    | 116 (0.32) | 0.85 |
| 12-03 | Gp3 | g.chr6:146125988C>T  | Missense Mutation | FBXO30  | p.M518I  | F-box protein 30          | 24 (0.00)    | 11 (0.91)  | 2.42 |
| 12-03 | Gp3 | g.chr8:124546989G>T  | Missense Mutation | FBXO32  | p.A61D   | F-box protein 32          | 45 (0.00)    | 24 (0.21)  | 0.56 |
| 12-03 | Gp3 | g.chr19:40368684G>A  | Missense Mutation | FCGBP   | p.R4222C | Fc fragment of IgG bind   | 52 (0.00)    | 478 (0.14) | 0.52 |
| 12-03 | Gp3 | g.chr1:149755757G>A  | Missense Mutation | FCGR1A  | p.R84K   | Fc fragment of IgG, hig   | 89 (0.00)    | 32 (0.47)  | 1.56 |
| 12-03 | Gp3 | g.chr1:155279985C>T  | Missense Mutation | FDPS    | p.R110W  | farnesyl diphosphate sy   | 59 (0.00)    | 212 (0.19) | 0.41 |
| 12-03 | Gp3 | g.chr17:72860021G>T  | Missense Mutation | FDXR    | p.P339T  | ferredoxin reductase      | 28 (0.00)    | 240 (0.15) | 0.41 |
| 12-03 | Gp3 | g.chr2:97370023A>G   | RNA               | FER1L5  |          | fer-1-like family membe   | 70 (0.00)    | 79 (0.47)  | 1.25 |
| 12-03 | Gp3 | g.chr1:241675343C>T  | Missense Mutation | FH      | p.R160K  | fumarate hydratase        | 30 (0.00)    | 17 (0.65)  | 1.73 |
| 12-03 | Gp3 | g.chr6:76124517G>A   | Missense Mutation | FILIP1  | p.H58Y   | filamin A interacting pr  | 15 (0.00)    | 22 (0.95)  | 2.55 |
| 12-03 | Gp3 | g.chr3:99568958G>A   | Missense Mutation | FILIP1L | p.A521V  | filamin A interacting pr  | 19 (0.00)    | 16 (0.88)  | 2.33 |
| 12-03 | Gp3 | g.chr9:115952825G>A  | Missense Mutation | FKBP15  | p.R367W  | FK506 binding protein     | 140 (0.00)   | 23 (0.22)  | 0.58 |
| 12-03 | Gp3 | g.chr1:152281246T>G  | Missense Mutation | FLG     | p.Y2039S | filaggrin                 | 30 (0.00)    | 70 (0.16)  | 0.42 |
| 12-03 | Gp3 | g.chr1:152285802C>T  | Silent            | FLG     | p.P520P  | filaggrin                 | 89 (0.00)    | 290 (0.54) | 1.44 |
| 12-03 | Gp3 | g.chr11:128680581G>C | Missense Mutation | FLI1    | p.G160R  | Fli-1 proto-oncogene, E'  | 221 (0.00)   | 460 (0.51) | 1.36 |
| 12-03 | Gp3 | g.chr11:128680780C>T | Missense Mutation | FLI1    | p.A226V  | Fli-1 proto-oncogene, E'  | 122 (0.00)   | 135 (0.17) | 0.45 |
| 12-03 | Gp3 | g.chr17:27209590C>T  | Splice Site       | FLOT2   |          | flotillin 2               | 33 (0.00)    | 149 (0.54) | 1.43 |
| 12-03 | Gp3 | g.chr15:33192221T>C  | Missense Mutation | FMN1    | p.S1205G | formin 1                  | 40 (0.00)    | 45 (0.27)  | 0.88 |
| 12-03 | Gp3 | g.chr15:33261508C>A  | Missense Mutation | FMN1    | p.K798N  | formin 1                  | 268 (0.00)   | 213 (0.64) | 2.10 |
| 12-03 | Gp3 | g.chr11:71932513G>C  | Splice Site       | FOLR2   |          | folate receptor 2 (fetal) | 30 (0.00)    | 34 (0.41)  | 1.10 |
| 12-03 | Gp3 | g.chr9:130575758C>A  | Missense Mutation | FPGS    | p.H547N  | folylpolyglutamate synt   | 137 (0.03)   | 288 (0.19) | 0.52 |
| 12-03 | Gp3 | g.chr9:37746020A>T   | Missense Mutation | FRMPD1  | p.M1331L | FERM and PDZ domain       | 48 (0.00)    | 141 (0.20) | 0.53 |
| 12-03 | Gp3 | g.chr14:44974030C>T  | Missense Mutation | FSCB    | p.A721T  | fibrous sheath CABYR      | 136 (0.03)   | 65 (0.88)  | 2.34 |
| 12-03 | Gp3 | g.chr2:186665472C>A  | Nonsense Mutation | FSIP2   | p.C3813* | fibrous sheath interact   | in 41 (0.00) | 34 (0.21)  | 0.55 |
| 12-03 | Gp3 | g.chr2:186667217C>T  | Missense Mutation | FSIP2   | p.S4395F | fibrous sheath interact   | in 19 (0.00) | 47 (0.94)  | 2.50 |
| 12-03 | Gp3 | g.chr5:132561473G>A  | Nonsense Mutation | FSTL4   | p.Q352*  | folliculin-like 4         | 38 (0.00)    | 25 (0.32)  | 0.85 |

|       |     |                     |                   |          |          |                                                       |            |      |
|-------|-----|---------------------|-------------------|----------|----------|-------------------------------------------------------|------------|------|
| 12-03 | Gp3 | g.chr17:7509003G>T  | Missense Mutation | FXR2     | p.A63D   | fragile X mental retardation 51 (0.00)                | 115 (0.37) | 0.79 |
| 12-03 | Gp3 | g.chr3:45999947G>A  | Missense Mutation | FYCO1    | p.P1251L | FYVE and coiled-coil domain 15 (0.00)                 | 13 (0.62)  | 1.64 |
| 12-03 | Gp3 | g.chr14:31066724T>C | Silent            | G2E3     | p.I209I  | G2/M-phase specific E331 (0.00)                       | 27 (0.63)  | 1.68 |
| 12-03 | Gp3 | g.chr5:151178813C>A | Missense Mutation | G3BP1    | p.P261H  | GTPase activating protein 37 (0.00)                   | 97 (0.63)  | 1.68 |
| 12-03 | Gp3 | g.chr10:26589852C>A | Missense Mutation | GAD2     | p.L574M  | glutamate decarboxylase 26 (0.00)                     | 31 (0.26)  | 0.69 |
| 12-03 | Gp3 | g.chr4:173930381G>A | Missense Mutation | GALNTL6  | p.G475E  | polypeptide N-acetylgalactosyltransferase 27 (0.00)   | 17 (0.29)  | 0.78 |
| 12-03 | Gp3 | g.chr12:6647301G>T  | Missense Mutation | GAPDH    | p.V325L  | glyceraldehyde-3-phosphate dehydrogenase 30 (0.00)    | 57 (0.18)  | 0.47 |
| 12-03 | Gp3 | g.chr16:90094107C>G | Missense Mutation | GAS8     | p.P23A   | growth arrest-specific protein 8 25 (0.00)            | 284 (0.22) | 0.59 |
| 12-03 | Gp3 | g.chr1:89729549T>A  | Missense Mutation | GBP5     | p.D411V  | guanylate binding protein 26 (0.00)                   | 24 (0.25)  | 0.67 |
| 12-03 | Gp3 | g.chr1:89729579G>A  | Missense Mutation | GBP5     | p.S401F  | guanylate binding protein 28 (0.00)                   | 24 (0.54)  | 1.44 |
| 12-03 | Gp3 | g.chr20:34025300C>A | Missense Mutation | GDF5     | p.A137S  | growth differentiation factor 22 (0.00)               | 96 (0.20)  | 0.53 |
| 12-03 | Gp3 | g.chr17:649497G>T   | Missense Mutation | GEMIN4   | p.P596T  | gem (nuclear organelle) 70 (0.00)                     | 109 (0.50) | 1.35 |
| 12-03 | Gp3 | g.chr17:650787C>A   | Nonsense Mutation | GEMIN4   | p.E166*  | gem (nuclear organelle) 147 (0.00)                    | 444 (0.18) | 0.47 |
| 12-03 | Gp3 | g.chr17:650802G>A   | Silent            | GEMIN4   | p.L161L  | gem (nuclear organelle) 145 (0.00)                    | 371 (0.22) | 0.58 |
| 12-03 | Gp3 | g.chr17:651077G>A   | Missense Mutation | GEMIN4   | p.A69V   | gem (nuclear organelle) 16 (0.00)                     | 23 (0.61)  | 1.62 |
| 12-03 | Gp3 | g.chr5:154316707C>T | Missense Mutation | GEMIN5   | p.G69S   | gem (nuclear organelle) 53 (0.00)                     | 20 (0.95)  | 2.53 |
| 12-03 | Gp3 | g.chr5:179762889C>A | Missense Mutation | GFPT2    | p.W93C   | glutamine-fructose-6-phosphate transaminase 21 (0.00) | 145 (0.19) | 0.60 |
| 12-03 | Gp3 | g.chr8:21608281G>A  | Missense Mutation | GFRA2    | p.R205C  | GNDF family receptor class 2 member 25 (0.00)         | 67 (0.22)  | 0.60 |
| 12-03 | Gp3 | g.chr17:73235056G>A | Missense Mutation | GGA3     | p.S558F  | golgi-associated, gamma class 22 (0.00)               | 74 (0.18)  | 0.47 |
| 12-03 | Gp3 | g.chr2:85777855G>T  | Missense Mutation | GGCX     | p.P636Q  | gamma-glutamyl carboxylase 32 (0.00)                  | 277 (0.23) | 0.49 |
| 12-03 | Gp3 | g.chr22:22989348C>A | Missense Mutation | GGTLC2   | p.P101T  | gamma-glutamyltransferase 42 (0.00)                   | 214 (0.33) | 0.87 |
| 12-03 | Gp3 | g.chr17:17957461C>A | Silent            | GID4     | p.T173T  | GID complex subunit 4 18 (0.00)                       | 12 (0.42)  | 1.11 |
| 12-03 | Gp3 | g.chr2:233671368G>A | Splice Site       | GIGYF2   |          | GRB10 interacting GYF20 (0.00)                        | 24 (0.79)  | 2.11 |
| 12-03 | Gp3 | g.chr1:39341707C>T  | Missense Mutation | GJA9     | p.G22R   | gap junction protein, alpha 97 (0.01)                 | 176 (0.45) | 1.21 |
| 12-03 | Gp3 | g.chr6:42821405G>A  | Missense Mutation | GLTSCR1L | p.A659T  | GLTSCR1-like 53 (0.00)                                | 48 (0.15)  | 0.39 |
| 12-03 | Gp3 | g.chr2:220368914G>T | Missense Mutation | GMPPA    | p.R200L  | GDP-mannose pyrophosphorylase 28 (0.00)               | 18 (0.72)  | 1.93 |
| 12-03 | Gp3 | g.chr3:50294181C>T  | Missense Mutation | GNAI2    | p.S207F  | guanine nucleotide binding protein 29 (0.00)          | 103 (0.15) | 0.39 |
| 12-03 | Gp3 | g.chr3:50294196G>A  | Nonsense Mutation | GNAI2    | p.W212*  | guanine nucleotide binding protein 26 (0.00)          | 117 (0.22) | 0.59 |
| 12-03 | Gp3 | g.chr16:56226488G>A | Missense Mutation | GNAO1    | p.A41T   | guanine nucleotide binding protein 33 (0.00)          | 57 (0.18)  | 0.47 |
| 12-03 | Gp3 | g.chr1:1720564C>T   | Missense Mutation | GNB1     | p.G282R  | guanine nucleotide binding protein 43 (0.00)          | 26 (0.77)  | 2.05 |
| 12-03 | Gp3 | g.chrX:109590018C>A | Silent            | GNG5P2   | p.L40L   | guanine nucleotide binding protein 29 (0.00)          | 122 (0.70) | 1.16 |
| 12-03 | Gp3 | g.chr1:38053043A>G  | Silent            | GNL2     | p.P146P  | guanine nucleotide binding protein 29 (0.00)          | 30 (0.23)  | 0.62 |
| 12-03 | Gp3 | g.chr3:52727021G>T  | Nonsense Mutation | GNL3     | p.E335*  | guanine nucleotide binding protein 49 (0.00)          | 40 (0.23)  | 0.60 |
| 12-03 | Gp3 | g.chr3:37379195G>A  | Silent            | GOLGA4   | p.S2137S | golgin A4 33 (0.00)                                   | 13 (0.38)  | 0.72 |
| 12-03 | Gp3 | g.chr15:28947196C>A | Missense Mutation | GOLGA8M  | p.Q601H  | golgin A8 family, member 58 (0.00)                    | 291 (0.33) | 1.10 |

|       |     |                      |                   |         |          |                           |            |            |      |
|-------|-----|----------------------|-------------------|---------|----------|---------------------------|------------|------------|------|
| 12-03 | Gp3 | g.chr3:121396172G>C  | Missense Mutation | GOLGB1  | p.S3000C | golgin B1                 | 15 (0.00)  | 30 (0.60)  | 1.60 |
| 12-03 | Gp3 | g.chr3:121400536G>T  | Silent            | GOLGB1  | p.L2957L | golgin B1                 | 28 (0.00)  | 18 (0.56)  | 1.48 |
| 12-03 | Gp3 | g.chr3:121410638C>T  | Missense Mutation | GOLGB1  | p.D2525N | golgin B1                 | 46 (0.00)  | 16 (0.94)  | 2.50 |
| 12-03 | Gp3 | g.chr2:171806173G>A  | Nonsense Mutation | GORASP2 | p.W90*   | golgi reassembly stackir  | 31 (0.00)  | 95 (0.57)  | 1.52 |
| 12-03 | Gp3 | g.chr10:113917033C>T | Missense Mutation | GPAM    | p.E699K  | glycerol-3-phosphate ac   | 23 (0.00)  | 16 (0.50)  | 1.33 |
| 12-03 | Gp3 | g.chr19:34857334G>A  | Silent            | GPI     | p.V69V   | glucose-6-phosphate iso   | 34 (0.00)  | 80 (0.20)  | 0.53 |
| 12-03 | Gp3 | g.chr17:36499047A>T  | Missense Mutation | GPR179  | p.L209H  | G protein-coupled recep   | 19 (0.00)  | 55 (0.33)  | 0.87 |
| 12-03 | Gp3 | g.chr13:99907971C>A  | Missense Mutation | GPR18   | p.K52N   | G protein-coupled recep   | 29 (0.00)  | 73 (0.60)  | 1.61 |
| 12-03 | Gp3 | g.chr5:90084016G>A   | Silent            | GPR98   | p.L4594L | G protein-coupled recep   | 27 (0.00)  | 14 (0.64)  | 1.71 |
| 12-03 | Gp3 | g.chr12:52407715G>A  | Silent            | GRASP   | p.L201L  | GRP1 (general receptor    | 60 (0.00)  | 228 (0.16) | 0.43 |
| 12-03 | Gp3 | g.chr7:50800005G>A   | Silent            | GRB10   | p.G5G    | growth factor receptor-b  | 31 (0.00)  | 12 (0.50)  | 1.33 |
| 12-03 | Gp3 | g.chr7:50800007C>A   | Missense Mutation | GRB10   | p.G5C    | growth factor receptor-b  | 31 (0.00)  | 12 (0.50)  | 1.33 |
| 12-03 | Gp3 | g.chr17:37898867C>A  | Silent            | GRB7    | p.P68P   | growth factor receptor-b  | 26 (0.00)  | 127 (0.34) | 0.90 |
| 12-03 | Gp3 | g.chr2:10104151C>T   | Missense Mutation | GRHL1   | p.H295Y  | grainyhead-like 1 (Dros   | 69 (0.00)  | 178 (0.15) | 0.39 |
| 12-03 | Gp3 | g.chr12:66770994A>G  | Missense Mutation | GRIP1   | p.L846S  | glutamate receptor inter  | 74 (0.00)  | 13 (0.69)  | 1.85 |
| 12-03 | Gp3 | g.chr5:176860627A>G  | Missense Mutation | GRK6    | p.M230V  | G protein-coupled recep   | 43 (0.00)  | 211 (0.35) | 1.11 |
| 12-03 | Gp3 | g.chr16:85697000G>T  | Missense Mutation | GSE1    | p.E808D  | Gse1 coiled-coil protein  | 25 (0.00)  | 41 (0.22)  | 0.59 |
| 12-03 | Gp3 | g.chr17:3629258C>T   | Missense Mutation | GSG2    | p.P677S  | germ cell associated 2 (l | 18 (0.00)  | 18 (0.61)  | 1.63 |
| 12-03 | Gp3 | g.chr19:42738519T>C  | Missense Mutation | GSK3A   | p.Y297C  | glycogen synthase kinas   | 48 (0.00)  | 60 (0.28)  | 0.76 |
| 12-03 | Gp3 | g.chr4:106639075G>A  | Missense Mutation | GSTCD   | p.R102K  | glutathione S-transferas  | 25 (0.00)  | 11 (0.45)  | 1.21 |
| 12-03 | Gp3 | g.chr8:30510973G>A   | Missense Mutation | GTF2E2  | p.S48L   | general transcription fac | 27 (0.00)  | 26 (0.92)  | 2.46 |
| 12-03 | Gp3 | g.chr3:148714114G>A  | Missense Mutation | GYG1    | p.E57K   | glycogenin 1              | 83 (0.00)  | 16 (0.31)  | 0.83 |
| 12-03 | Gp3 | g.chr20:23345887G>A  | Silent            | GZF1    | p.E289E  | GDNF-inducible zinc fi    | 21 (0.00)  | 75 (0.52)  | 1.39 |
| 12-03 | Gp3 | g.chr15:89424944C>T  | Missense Mutation | HAPLN3  | p.G108E  | hyaluronan and proteogl   | 27 (0.00)  | 200 (0.23) | 0.63 |
| 12-03 | Gp3 | g.chr7:18536872T>C   | Intron            | HDAC9   |          | histone deacetylase 9     | 110 (0.00) | 32 (0.34)  | 0.92 |
| 12-03 | Gp3 | g.chr7:18537704C>A   | Intron            | HDAC9   |          | histone deacetylase 9     | 35 (0.00)  | 108 (0.31) | 0.81 |
| 12-03 | Gp3 | g.chr7:18575893T>A   | Intron            | HDAC9   |          | histone deacetylase 9     | 89 (0.00)  | 99 (0.29)  | 0.78 |
| 12-03 | Gp3 | g.chr7:18633266G>T   | Intron            | HDAC9   |          | histone deacetylase 9     | 29 (0.00)  | 104 (0.49) | 1.31 |
| 12-03 | Gp3 | g.chr7:18712973G>T   | Intron            | HDAC9   |          | histone deacetylase 9     | 66 (0.00)  | 164 (0.16) | 0.42 |
| 12-03 | Gp3 | g.chr7:18829657G>A   | Intron            | HDAC9   |          | histone deacetylase 9     | 56 (0.00)  | 22 (0.23)  | 0.61 |
| 12-03 | Gp3 | g.chr7:18883013G>T   | Intron            | HDAC9   |          | histone deacetylase 9     | 26 (0.00)  | 27 (0.26)  | 0.69 |
| 12-03 | Gp3 | g.chr7:18887154C>T   | Intron            | HDAC9   |          | histone deacetylase 9     | 33 (0.00)  | 36 (0.44)  | 1.19 |
| 12-03 | Gp3 | g.chr7:18901463G>A   | Intron            | HDAC9   |          | histone deacetylase 9     | 29 (0.00)  | 18 (0.39)  | 1.04 |
| 12-03 | Gp3 | g.chr7:18988883C>G   | Intron            | HDAC9   |          | histone deacetylase 9     | 65 (0.00)  | 80 (0.57)  | 1.53 |
| 12-03 | Gp3 | g.chr15:91475030C>T  | Missense Mutation | HDDC3   | p.V105M  | HD domain containing      | 20 (0.00)  | 71 (0.28)  | 0.75 |

|       |     |                      |                   |           |          |                           |            |            |      |
|-------|-----|----------------------|-------------------|-----------|----------|---------------------------|------------|------------|------|
| 12-03 | Gp3 | g.chr14:31598644A>C  | Missense Mutation | HECTD1    | p.D1311E | HECT domain containir     | 38 (0.00)  | 66 (0.15)  | 0.40 |
| 12-03 | Gp3 | g.chr12:112681776G>T | Missense Mutation | HECTD4    | p.H1371Q | HECT domain containir     | 156 (0.00) | 127 (0.60) | 1.60 |
| 12-03 | Gp3 | g.chr7:43351662G>T   | Missense Mutation | HECW1     | p.D110Y  | HECT, C2 and WW dor       | 29 (0.00)  | 51 (0.16)  | 0.42 |
| 12-03 | Gp3 | g.chr17:65083037G>A  | Missense Mutation | HELZ      | p.P1801L | helicase with zinc finger | 21 (0.00)  | 21 (0.43)  | 1.14 |
| 12-03 | Gp3 | g.chr9:100692844G>C  | Missense Mutation | HEMGN     | p.P278R  | hemogen                   | 68 (0.00)  | 33 (0.15)  | 0.40 |
| 12-03 | Gp3 | g.chr3:50608670C>G   | Silent            | HEMK1     | p.V45V   | HemK methyltransferas     | 34 (0.00)  | 44 (0.43)  | 1.15 |
| 12-03 | Gp3 | g.chr15:28375700C>G  | Missense Mutation | HERC2     | p.C4204S | HECT and RLD domain       | 113 (0.00) | 149 (0.21) | 0.68 |
| 12-03 | Gp3 | g.chr15:28375725C>G  | Missense Mutation | HERC2     | p.G4196R | HECT and RLD domain       | 104 (0.00) | 166 (0.16) | 0.54 |
| 12-03 | Gp3 | g.chr15:28424295C>T  | Silent            | HERC2     | p.L3004L | HECT and RLD domain       | 23 (0.00)  | 23 (0.57)  | 1.86 |
| 12-03 | Gp3 | g.chr15:23311659C>T  | RNA               | HERC2P2   |          | hect domain and RLD 2     | 16 (0.00)  | 61 (0.48)  | 1.27 |
| 12-03 | Gp3 | g.chr15:23318695G>A  | RNA               | HERC2P2   |          | hect domain and RLD 2     | 158 (0.00) | 82 (0.15)  | 0.39 |
| 12-03 | Gp3 | g.chr15:20644845C>A  | RNA               | HERC2P3   |          | hect domain and RLD 2     | 39 (0.00)  | 186 (0.17) | 0.44 |
| 12-03 | Gp3 | g.chr15:20651283G>A  | RNA               | HERC2P3   |          | hect domain and RLD 2     | 75 (0.01)  | 132 (0.23) | 0.63 |
| 12-03 | Gp3 | g.chr1:145416531G>A  | Silent            | HFE2      | p.G292G  | hemochromatosis type      | 262 (0.00) | 66 (0.27)  | 0.73 |
| 12-03 | Gp3 | g.chr22:21799299C>T  | Nonsense Mutation | HIC2      | p.Q39*   | hypermethylated in canc   | 40 (0.00)  | 605 (0.14) | 0.54 |
| 12-03 | Gp3 | g.chr19:40886789C>A  | Missense Mutation | HIPK4     | p.R370L  | homeodomain interactin    | 26 (0.00)  | 215 (0.16) | 0.59 |
| 12-03 | Gp3 | g.chr6:27101235G>A   | Missense Mutation | HIST1H2AG | p.G129S  | histone cluster 1, H2ag   | 39 (0.00)  | 254 (0.21) | 0.56 |
| 12-03 | Gp3 | g.chr6:27100359G>A   | Silent            | HIST1H2BJ | p.S57S   | histone cluster 1, H2bj   | 125 (0.00) | 146 (0.18) | 0.49 |
| 12-03 | Gp3 | g.chr6:27783169C>A   | Silent            | HIST1H2BM | p.T116T  | histone cluster 1, H2bm   | 41 (0.00)  | 272 (0.15) | 0.39 |
| 12-03 | Gp3 | g.chr1:42046859G>A   | Missense Mutation | HIVEP3    | p.H1204Y | human immunodeficien      | 28 (0.00)  | 31 (0.19)  | 0.52 |
| 12-03 | Gp3 | g.chr1:42047121G>C   | Silent            | HIVEP3    | p.P1116P | human immunodeficien      | 22 (0.00)  | 248 (0.29) | 0.77 |
| 12-03 | Gp3 | g.chr1:42049618G>A   | Missense Mutation | HIVEP3    | p.S284F  | human immunodeficien      | 64 (0.00)  | 294 (0.29) | 0.77 |
| 12-03 | Gp3 | g.chr5:177632986T>C  | Missense Mutation | HNRNPAB   | p.F118S  | heterogeneous nuclear r   | 46 (0.00)  | 172 (0.12) | 0.39 |
| 12-03 | Gp3 | g.chr19:41811583G>T  | Silent            | HNRNPUL1  | p.P755P  | heterogeneous nuclear r   | 58 (0.00)  | 50 (0.48)  | 1.28 |
| 12-03 | Gp3 | g.chr22:30517718G>A  | Missense Mutation | HORMAD2   | p.D170N  | HORMA domain contai       | 41 (0.00)  | 20 (0.25)  | 0.67 |
| 12-03 | Gp3 | g.chr7:27134122G>C   | Missense Mutation | HOXA1     | p.S315R  | homeobox A1               | 37 (0.00)  | 20 (0.65)  | 1.73 |
| 12-03 | Gp3 | g.chr7:27135110T>C   | Missense Mutation | HOXA1     | p.Q141R  | homeobox A1               | 35 (0.00)  | 30 (0.33)  | 0.89 |
| 12-03 | Gp3 | g.chr2:177033967G>T  | Missense Mutation | HOXD3     | p.G42V   | homeobox D3               | 60 (0.00)  | 246 (0.15) | 0.39 |
| 12-03 | Gp3 | g.chr10:100195426G>A | Missense Mutation | HPS1      | p.T74M   | Hermansky-Pudlak sync     | 30 (0.00)  | 41 (0.22)  | 0.59 |
| 12-03 | Gp3 | g.chr3:192980799C>T  | Silent            | HRASLS    | p.F165F  | HRAS-like suppressor      | 36 (0.03)  | 148 (0.97) | 2.59 |
| 12-03 | Gp3 | g.chr3:192980800A>T  | Missense Mutation | HRASLS    | p.S166C  | HRAS-like suppressor      | 36 (0.03)  | 148 (0.97) | 2.59 |
| 12-03 | Gp3 | g.chr1:152191816C>T  | Silent            | HRNR      | p.S763S  | hornerin                  | 22 (0.00)  | 238 (0.21) | 0.57 |
| 12-03 | Gp3 | g.chr6:44219568C>G   | Nonsense Mutation | HSP90AB1  | p.S470*  | heat shock protein 90kD   | 18 (0.00)  | 21 (0.29)  | 0.76 |
| 12-03 | Gp3 | g.chr5:132406110G>A  | Silent            | HSPA4     | p.V117V  | heat shock 70kDa protei   | 26 (0.00)  | 17 (0.41)  | 1.10 |
| 12-03 | Gp3 | g.chr9:128002979C>A  | Missense Mutation | HSPA5     | p.Q110H  | heat shock 70kDa protei   | 38 (0.00)  | 59 (0.51)  | 1.36 |



|       |     |                      |                       |             |          |                                 |            |            |      |
|-------|-----|----------------------|-----------------------|-------------|----------|---------------------------------|------------|------------|------|
| 12-03 | Gp3 | g.chr4:3174103G>A    | Missense Mutation     | HTT         | p.M1307I | huntingtin                      | 44 (0.02)  | 21 (0.52)  | 1.40 |
| 12-03 | Gp3 | g.chr21:33296872C>T  | Silent                | HUNK        | p.I118I  | hormonally up-regulated         | 57 (0.00)  | 120 (0.37) | 0.98 |
| 12-03 | Gp3 | g.chr8:39785498G>A   | Missense Mutation     | IDO1        | p.V336M  | indoleamine 2,3-dioxygenase     | 22 (0.00)  | 55 (0.27)  | 0.73 |
| 12-03 | Gp3 | g.chr14:106207828G>T | RNA                   | IGHG1       |          | immunoglobulin heavy chain      | 32 (0.00)  | 35 (0.37)  | 0.99 |
| 12-03 | Gp3 | g.chr14:106208215C>G | RNA                   | IGHG1       |          | immunoglobulin heavy chain      | 34 (0.00)  | 466 (0.31) | 0.82 |
| 12-03 | Gp3 | g.chr21:10862766T>A  | RNA                   | IGHV1OR21-1 |          | immunoglobulin heavy chain      | 128 (0.00) | 62 (0.15)  | 0.39 |
| 12-03 | Gp3 | g.chr14:107013175G>T | RNA                   | IGHV3-49    |          | immunoglobulin heavy chain      | 18 (0.00)  | 36 (0.58)  | 1.56 |
| 12-03 | Gp3 | g.chr14:106805490C>A | RNA                   | IGHV4-31    |          | immunoglobulin heavy chain      | 16 (0.00)  | 87 (0.18)  | 0.49 |
| 12-03 | Gp3 | g.chr14:107083464G>T | RNA                   | IGHV4-59    |          | immunoglobulin heavy chain      | 17 (0.00)  | 82 (0.22)  | 0.59 |
| 12-03 | Gp3 | g.chr3:53894167G>A   | Silent                | IL17RB      | p.K286K  | interleukin 17 receptor 1       | 47 (0.00)  | 52 (0.65)  | 1.74 |
| 12-03 | Gp3 | g.chr15:41277590C>T  | Silent                | INO80       | p.E1289E | INO80 complex subunit           | 35 (0.00)  | 31 (0.42)  | 1.12 |
| 12-03 | Gp3 | g.chr2:99193523G>T   | Silent                | INPP4A      | p.V867V  | inositol polyphosphate 4-kinase | 16 (0.00)  | 146 (0.25) | 0.66 |
| 12-03 | Gp3 | g.chr4:142972477G>A  | Intron                | INPP4B      |          | inositol polyphosphate 4-kinase | 19 (0.00)  | 45 (0.16)  | 0.41 |
| 12-03 | Gp3 | g.chr4:142983212T>A  | Intron                | INPP4B      |          | inositol polyphosphate 4-kinase | 28 (0.00)  | 38 (0.32)  | 0.84 |
| 12-03 | Gp3 | g.chr4:143014481C>T  | Intron                | INPP4B      |          | inositol polyphosphate 4-kinase | 196 (0.00) | 64 (0.88)  | 2.33 |
| 12-03 | Gp3 | g.chr4:143069254C>A  | Intron                | INPP4B      |          | inositol polyphosphate 4-kinase | 52 (0.00)  | 27 (0.30)  | 0.79 |
| 12-03 | Gp3 | g.chr4:143070358C>T  | Intron                | INPP4B      |          | inositol polyphosphate 4-kinase | 15 (0.00)  | 12 (0.42)  | 1.11 |
| 12-03 | Gp3 | g.chr4:143076609C>A  | Intron                | INPP4B      |          | inositol polyphosphate 4-kinase | 140 (0.00) | 21 (0.57)  | 1.52 |
| 12-03 | Gp3 | g.chr4:143163368G>T  | Intron                | INPP4B      |          | inositol polyphosphate 4-kinase | 32 (0.00)  | 22 (0.64)  | 1.70 |
| 12-03 | Gp3 | g.chr4:143188903G>A  | Intron                | INPP4B      |          | inositol polyphosphate 4-kinase | 61 (0.00)  | 30 (0.83)  | 2.22 |
| 12-03 | Gp3 | g.chr4:143214569C>G  | Intron                | INPP4B      |          | inositol polyphosphate 4-kinase | 43 (0.00)  | 13 (0.85)  | 2.26 |
| 12-03 | Gp3 | g.chr4:143272252C>T  | Intron                | INPP4B      |          | inositol polyphosphate 4-kinase | 23 (0.00)  | 42 (0.17)  | 0.44 |
| 12-03 | Gp3 | g.chr4:143305132G>A  | Intron                | INPP4B      |          | inositol polyphosphate 4-kinase | 110 (0.01) | 278 (0.21) | 0.55 |
| 12-03 | Gp3 | g.chr4:143402956C>T  | Intron                | INPP4B      |          | inositol polyphosphate 4-kinase | 38 (0.03)  | 16 (0.75)  | 2.00 |
| 12-03 | Gp3 | g.chr4:143501916C>A  | Intron                | INPP4B      |          | inositol polyphosphate 4-kinase | 90 (0.00)  | 16 (0.31)  | 0.83 |
| 12-03 | Gp3 | g.chr4:143501929G>T  | Intron                | INPP4B      |          | inositol polyphosphate 4-kinase | 86 (0.00)  | 16 (0.38)  | 1.00 |
| 12-03 | Gp3 | g.chr4:143674663A>T  | Intron                | INPP4B      |          | inositol polyphosphate 4-kinase | 94 (0.00)  | 24 (0.42)  | 1.11 |
| 12-03 | Gp3 | g.chr1:212161253G>T  | Silent                | INTS7       | p.I324I  | integrator complex subunit      | 19 (0.00)  | 30 (0.17)  | 0.44 |
| 12-03 | Gp3 | g.chr1:212161285C>A  | Missense Mutation     | INTS7       | p.V314F  | integrator complex subunit      | 19 (0.00)  | 30 (0.23)  | 0.62 |
| 12-03 | Gp3 | g.chr8:95885700G>A   | Missense Mutation     | INTS8       | p.D878N  | integrator complex subunit      | 16 (0.00)  | 50 (0.88)  | 2.35 |
| 12-03 | Gp3 | g.chr2:237240148G>A  | Nonsense Mutation     | IQCA1       | p.Q743*  | IQ motif containing with        | 51 (0.00)  | 47 (0.70)  | 1.87 |
| 12-03 | Gp3 | g.chr7:2634571G>A    | Silent                | IQCE        | p.K467K  | IQ motif containing E           | 83 (0.00)  | 466 (0.20) | 0.52 |
| 12-03 | Gp3 | g.chr15:76632812G>T  | Missense Mutation     | ISL2        | p.R236L  | ISL LIM homeobox 2              | 15 (0.00)  | 20 (0.40)  | 0.55 |
| 12-03 | Gp3 | g.chr16:304412G>A    | De novo Start InFrame | ITFG3       |          | integrin alpha FG-GAP           | 52 (0.02)  | 353 (0.33) | 1.12 |
| 12-03 | Gp3 | g.chr16:30529005G>T  | Missense Mutation     | ITGAL       | p.E1004D | integrin, alpha L (antigen)     | 25 (0.00)  | 248 (0.21) | 0.72 |

|       |     |                      |                   |           |          |                           |            |            |      |
|-------|-----|----------------------|-------------------|-----------|----------|---------------------------|------------|------------|------|
| 12-03 | Gp3 | g.chr16:31284706C>T  | Missense Mutation | ITGAM     | p.T242I  | integrin, alpha M (comp   | 50 (0.00)  | 16 (0.31)  | 1.07 |
| 12-03 | Gp3 | g.chr7:20420383C>T   | Nonsense Mutation | ITGB8     | p.Q244*  | integrin, beta 8          | 53 (0.00)  | 19 (0.26)  | 0.70 |
| 12-03 | Gp3 | g.chr10:7621734C>A   | Missense Mutation | ITIH5     | p.G468C  | inter-alpha-trypsin inhib | 17 (0.00)  | 236 (0.17) | 0.45 |
| 12-03 | Gp3 | g.chr2:24432795G>A   | Silent            | ITSN2     | p.F1455F | intersectin 2             | 52 (0.00)  | 160 (0.68) | 1.80 |
| 12-03 | Gp3 | g.chr14:105618538G>C | Missense Mutation | JAG2      | p.C293W  | jagged 2                  | 21 (0.00)  | 161 (0.22) | 0.58 |
| 12-03 | Gp3 | g.chr10:133950582G>T | Missense Mutation | JAKMIP3   | p.Q392H  | Janus kinase and microt   | 85 (0.00)  | 351 (0.35) | 0.94 |
| 12-03 | Gp3 | g.chr1:153949242G>T  | Nonsense Mutation | JTB       | p.S44*   | jumping translocation b   | 46 (0.00)  | 53 (0.19)  | 0.40 |
| 12-03 | Gp3 | g.chr8:41790017G>T   | Silent            | KAT6A     | p.P1907P | K(lysine) acetyltransfer  | 34 (0.00)  | 59 (0.27)  | 0.72 |
| 12-03 | Gp3 | g.chr16:57785929C>G  | Missense Mutation | KATNB1    | p.H198Q  | katanin p80 (WD repeat    | 48 (0.02)  | 386 (0.32) | 0.85 |
| 12-03 | Gp3 | g.chr12:5021796G>T   | Nonsense Mutation | KCNA1     | p.E418*  | potassium voltage-gated   | 100 (0.00) | 68 (0.78)  | 2.08 |
| 12-03 | Gp3 | g.chr12:4920705G>A   | Missense Mutation | KCNA6     | p.D500N  | potassium voltage-gated   | 39 (0.00)  | 79 (0.61)  | 1.62 |
| 12-03 | Gp3 | g.chr3:156249238G>A  | Silent            | KCNAB1    | p.L356L  | potassium voltage-gated   | 127 (0.00) | 75 (0.64)  | 1.71 |
| 12-03 | Gp3 | g.chr12:75444510G>T  | Silent            | KCNC2     | p.P425P  | potassium voltage-gated   | 30 (0.00)  | 15 (0.40)  | 1.07 |
| 12-03 | Gp3 | g.chr16:84255908G>A  | Missense Mutation | KCNG4     | p.P492L  | potassium voltage-gated   | 91 (0.00)  | 137 (0.35) | 0.93 |
| 12-03 | Gp3 | g.chr20:62073870G>A  | Silent            | KCNQ2     | p.A235A  | potassium voltage-gated   | 22 (0.00)  | 490 (0.27) | 0.71 |
| 12-03 | Gp3 | g.chr8:99440869C>A   | Missense Mutation | KCNS2     | p.P221H  | potassium voltage-gated   | 40 (0.00)  | 133 (0.20) | 0.52 |
| 12-03 | Gp3 | g.chr2:18112555C>A   | Missense Mutation | KCNS3     | p.L94M   | potassium voltage-gated   | 68 (0.00)  | 15 (0.80)  | 2.13 |
| 12-03 | Gp3 | g.chr8:36766868A>T   | Missense Mutation | KCNU1     | p.I716F  | potassium channel, subf   | 140 (0.00) | 71 (0.28)  | 0.75 |
| 12-03 | Gp3 | g.chr7:128530297A>G  | RNA               | KCP       |          | kielin/chordin-like prote | 18 (0.00)  | 58 (0.19)  | 0.51 |
| 12-03 | Gp3 | g.chr6:36447443C>T   | Missense Mutation | KCTD20    | p.L205F  | potassium channel tetra   | 101 (0.00) | 57 (0.35)  | 0.94 |
| 12-03 | Gp3 | g.chr6:36454928G>A   | Missense Mutation | KCTD20    | p.M412I  | potassium channel tetra   | 73 (0.00)  | 35 (0.17)  | 0.46 |
| 12-03 | Gp3 | g.chr12:431710G>A    | Silent            | KDM5A     | p.L767L  | lysine (K)-specific dem   | 26 (0.00)  | 23 (0.96)  | 2.55 |
| 12-03 | Gp3 | g.chr2:27319603G>A   | Silent            | KHK       | p.L117L  | ketoheokinase (fructok    | 56 (0.00)  | 62 (0.66)  | 1.76 |
| 12-03 | Gp3 | g.chr19:6418508G>T   | Missense Mutation | KHSRP     | p.P289T  | KH-type splicing regula   | 15 (0.00)  | 212 (0.56) | 2.02 |
| 12-03 | Gp3 | g.chr19:6418559C>T   | Missense Mutation | KHSRP     | p.D272N  | KH-type splicing regula   | 17 (0.00)  | 216 (0.69) | 2.47 |
| 12-03 | Gp3 | g.chr9:114184267C>T  | Silent            | KIAA0368  | p.A463A  | KIAA0368                  | 19 (0.00)  | 12 (0.75)  | 2.00 |
| 12-03 | Gp3 | g.chr12:105557951C>A | Missense Mutation | KIAA1033  | p.Q1074K | KIAA1033                  | 17 (0.00)  | 12 (0.50)  | 1.33 |
| 12-03 | Gp3 | g.chr15:81234199C>T  | Silent            | KIAA1199  | p.F1139F |                           | 37 (0.00)  | 35 (0.77)  | 2.06 |
| 12-03 | Gp3 | g.chr3:128711914G>A  | Silent            | KIAA1257  | p.T78T   | KIAA1257                  | 50 (0.00)  | 104 (0.15) | 0.41 |
| 12-03 | Gp3 | g.chr10:30317271G>A  | Silent            | KIAA1462  | p.D602D  | KIAA1462                  | 34 (0.00)  | 84 (0.50)  | 1.33 |
| 12-03 | Gp3 | g.chr11:33667258C>A  | Silent            | KIAA1549L | p.T1515T | KIAA1549-like             | 134 (0.00) | 317 (0.31) | 0.82 |
| 12-03 | Gp3 | g.chr17:43006346G>C  | Missense Mutation | KIF18B    | p.L522V  | kinesin family member     | 21 (0.00)  | 98 (0.16)  | 0.44 |
| 12-03 | Gp3 | g.chr2:241666289G>A  | Missense Mutation | KIF1A     | p.T1258I | kinesin family member     | 22 (0.00)  | 197 (0.18) | 0.49 |
| 12-03 | Gp3 | g.chr16:29810009G>T  | Nonsense Mutation | KIF22     | p.E96*   | kinesin family member     | 23 (0.00)  | 88 (0.33)  | 0.88 |
| 12-03 | Gp3 | g.chr5:154393459C>A  | Missense Mutation | KIF4B     | p.L14M   | kinesin family member     | 40 (0.00)  | 60 (0.17)  | 0.44 |

|       |     |                      |                   |           |          |                           |            |            |      |
|-------|-----|----------------------|-------------------|-----------|----------|---------------------------|------------|------------|------|
| 12-03 | Gp3 | g.chr19:36216440C>A  | Silent            | KMT2B     | p.R1235R | lysine (K)-specific meth  | 26 (0.00)  | 113 (0.34) | 0.90 |
| 12-03 | Gp3 | g.chr17:45752013C>A  | Silent            | KPNB1     | p.R448R  | karyopherin (importin) l  | 105 (0.00) | 32 (0.94)  | 2.50 |
| 12-03 | Gp3 | g.chr17:39741258C>T  | Missense Mutation | KRT14     | p.A193T  | keratin 14                | 30 (0.00)  | 23 (0.52)  | 0.97 |
| 12-03 | Gp3 | g.chr11:124984248G>A | RNA               | KRT18P59  |          | keratin 18 pseudogene     | 527 (0.00) | 14 (0.57)  | 1.52 |
| 12-03 | Gp3 | g.chr17:38906659T>C  | Missense Mutation | KRT25     | p.Y383C  | keratin 25                | 51 (0.00)  | 59 (0.20)  | 0.54 |
| 12-03 | Gp3 | g.chr12:53185179G>A  | Missense Mutation | KRT3      | p.A449V  | keratin 3                 | 51 (0.00)  | 351 (0.26) | 0.69 |
| 12-03 | Gp3 | g.chr17:39502390C>G  | Missense Mutation | KRT33A    | p.C399S  | keratin 33A               | 35 (0.00)  | 50 (0.18)  | 0.48 |
| 12-03 | Gp3 | g.chr17:39502394G>C  | Missense Mutation | KRT33A    | p.P398A  | keratin 33A               | 37 (0.00)  | 48 (0.15)  | 0.39 |
| 12-03 | Gp3 | g.chr17:39502754C>T  | Missense Mutation | KRT33A    | p.R348Q  | keratin 33A               | 48 (0.00)  | 167 (0.16) | 0.42 |
| 12-03 | Gp3 | g.chr17:39521222C>A  | Missense Mutation | KRT33B    | p.E302D  | keratin 33B               | 15 (0.00)  | 112 (0.22) | 0.60 |
| 12-03 | Gp3 | g.chr17:39538014C>T  | Missense Mutation | KRT34     | p.V170M  | keratin 34                | 29 (0.00)  | 191 (0.15) | 0.39 |
| 12-03 | Gp3 | g.chr17:39594998G>A  | Missense Mutation | KRT38     | p.A282V  | keratin 38                | 46 (0.00)  | 116 (0.35) | 0.94 |
| 12-03 | Gp3 | g.chr12:52841686G>A  | Silent            | KRT6B     | p.L434L  | keratin 6B                | 59 (0.00)  | 151 (0.32) | 0.87 |
| 12-03 | Gp3 | g.chr12:52967121C>T  | Silent            | KRT74     | p.L147L  | keratin 74                | 15 (0.00)  | 39 (0.46)  | 1.23 |
| 12-03 | Gp3 | g.chr12:52681812C>G  | Missense Mutation | KRT81     | p.V286L  | keratin 81                | 19 (0.00)  | 28 (0.18)  | 0.48 |
| 12-03 | Gp3 | g.chr12:52778955C>T  | Missense Mutation | KRT84     | p.A139T  | keratin 84                | 42 (0.00)  | 22 (0.95)  | 2.55 |
| 12-03 | Gp3 | g.chr17:39334070T>C  | Missense Mutation | KRTAP4-2  | p.Y116C  | keratin associated protei | 34 (0.00)  | 175 (0.18) | 0.47 |
| 12-03 | Gp3 | g.chr11:1628993C>A   | Missense Mutation | KRTAP5-3  | p.G208V  | keratin associated protei | 66 (0.00)  | 556 (0.20) | 0.53 |
| 12-03 | Gp3 | g.chr17:39346851C>A  | Missense Mutation | KRTAP9-1  | p.P238H  | keratin associated protei | 25 (0.00)  | 72 (0.43)  | 1.15 |
| 12-03 | Gp3 | g.chr17:39346885C>A  | Nonsense Mutation | KRTAP9-1  | p.C249*  | keratin associated protei | 22 (0.00)  | 51 (0.55)  | 1.46 |
| 12-03 | Gp3 | g.chr1:201355923G>A  | Missense Mutation | LAD1      | p.T189M  | ladinin 1                 | 47 (0.02)  | 157 (0.19) | 0.51 |
| 12-03 | Gp3 | g.chr7:107613517C>A  | Splice Site       | LAMB1     |          | laminin, beta 1           | 27 (0.00)  | 24 (0.83)  | 2.22 |
| 12-03 | Gp3 | g.chr1:209807795C>A  | Silent            | LAMB3     | p.G187G  | laminin, beta 3           | 39 (0.00)  | 216 (0.29) | 0.77 |
| 12-03 | Gp3 | g.chr6:150004585G>T  | Missense Mutation | LATS1     | p.A547D  | large tumor suppressor l  | 34 (0.00)  | 44 (0.20)  | 0.55 |
| 12-03 | Gp3 | g.chr20:36982723C>A  | Silent            | LBP       | p.I136I  | lipopolysaccharide bind   | 22 (0.00)  | 68 (0.41)  | 1.10 |
| 12-03 | Gp3 | g.chr1:152636701T>C  | Silent            | LCE2D     | p.C40C   | late cornified envelope   | 246 (0.00) | 494 (0.16) | 0.43 |
| 12-03 | Gp3 | g.chr9:139641878G>A  | Silent            | LCN6      | p.H66H   | lipocalin 6               | 15 (0.00)  | 191 (0.12) | 0.41 |
| 12-03 | Gp3 | g.chr4:17885391C>T   | Missense Mutation | LCORL     | p.M503I  | ligand dependent nuclea   | 23 (0.00)  | 16 (0.56)  | 1.50 |
| 12-03 | Gp3 | g.chr19:11230902G>A  | Silent            | LDLR      | p.Q660Q  | low density lipoprotein   | 123 (0.00) | 27 (0.33)  | 1.17 |
| 12-03 | Gp3 | g.chr4:1818635G>T    | Missense Mutation | LETM1     | p.Q584K  | leucine zipper-EF-hand    | 97 (0.00)  | 287 (0.17) | 0.46 |
| 12-03 | Gp3 | g.chr1:180235614G>T  | Silent            | LHX4      | p.L112L  | LIM homeobox 4            | 17 (0.00)  | 57 (0.32)  | 0.84 |
| 12-03 | Gp3 | g.chr13:108860946C>T | Missense Mutation | LIG4      | p.E891K  | ligase IV, DNA, ATP-d     | 31 (0.00)  | 18 (0.67)  | 1.78 |
| 12-03 | Gp3 | g.chr9:132252823C>A  | RNA               | LINC00963 |          | long intergenic non-prot  | 50 (0.00)  | 48 (0.54)  | 1.44 |
| 12-03 | Gp3 | g.chr3:69168170A>G   | Missense Mutation | LMOD3     | p.F446L  | leiomodoin 3 (fetal)      | 147 (0.00) | 33 (0.27)  | 0.73 |
| 12-03 | Gp3 | g.chr7:97833269G>T   | Missense Mutation | LMTK2     | p.E1418D | lemur tyrosine kinase 2   | 57 (0.00)  | 360 (0.15) | 0.41 |

|       |     |                      |                   |         |          |                                     |            |      |
|-------|-----|----------------------|-------------------|---------|----------|-------------------------------------|------------|------|
| 12-03 | Gp3 | g.chr18:44173690T>A  | Missense Mutation | LOXHD1  | p.D435V  | lipoxygenase homology 42 (0.00)     | 25 (0.44)  | 1.17 |
| 12-03 | Gp3 | g.chr10:100016597G>C | Silent            | LOXL4   | p.L456L  | lysyl oxidase-like 4 16 (0.00)      | 53 (0.15)  | 0.40 |
| 12-03 | Gp3 | g.chr6:160978444G>C  | Missense Mutation | LPA     | p.S1597R | lipoprotein, Lp(a) 15 (0.00)        | 39 (0.56)  | 1.50 |
| 12-03 | Gp3 | g.chr12:7087653A>G   | Missense Mutation | LPCAT3  | p.L297S  | lysophosphatidylcholine 78 (0.00)   | 38 (0.50)  | 1.33 |
| 12-03 | Gp3 | g.chr3:197547201G>C  | Silent            | LRCH3   | p.V180V  | leucine-rich repeats and 32 (0.00)  | 19 (0.95)  | 2.53 |
| 12-03 | Gp3 | g.chr3:66436710G>A   | Missense Mutation | LRIG1   | p.P495L  | leucine-rich repeats and 106 (0.00) | 28 (0.93)  | 2.48 |
| 12-03 | Gp3 | g.chr12:57567585G>T  | Missense Mutation | LRP1    | p.W1123C | low density lipoprotein 119 (0.00)  | 164 (0.23) | 0.60 |
| 12-03 | Gp3 | g.chr2:141598606C>A  | Missense Mutation | LRP1B   | p.W1665C | low density lipoprotein 119 (0.00)  | 15 (0.80)  | 2.13 |
| 12-03 | Gp3 | g.chr2:170009391G>A  | Missense Mutation | LRP2    | p.R4127C | low density lipoprotein 161 (0.00)  | 50 (0.60)  | 1.60 |
| 12-03 | Gp3 | g.chr2:170010976C>T  | Missense Mutation | LRP2    | p.G4097S | low density lipoprotein 122 (0.00)  | 10 (0.60)  | 1.60 |
| 12-03 | Gp3 | g.chr3:194081160A>T  | Missense Mutation | LRRC15  | p.Y205N  | leucine rich repeat conta 57 (0.00) | 347 (0.18) | 0.48 |
| 12-03 | Gp3 | g.chr1:70671093G>C   | Missense Mutation | LRRC40  | p.S44W   | leucine rich repeat conta 22 (0.00) | 115 (0.23) | 0.60 |
| 12-03 | Gp3 | g.chr17:45913442C>T  | Silent            | LRRC46  | p.N142N  | leucine rich repeat conta 60 (0.00) | 80 (0.42)  | 1.13 |
| 12-03 | Gp3 | g.chr1:70505212G>T   | Missense Mutation | LRRC7   | p.R1197S | leucine rich repeat conta 15 (0.00) | 32 (0.38)  | 1.00 |
| 12-03 | Gp3 | g.chr9:131670298C>T  | Silent            | LRRC8A  | p.Y285Y  | leucine rich repeat conta 73 (0.00) | 43 (0.35)  | 0.93 |
| 12-03 | Gp3 | g.chr10:68687867C>A  | Missense Mutation | LRRTM3  | p.T398K  | leucine rich repeat trans 34 (0.00) | 207 (0.32) | 0.86 |
| 12-03 | Gp3 | g.chr20:60706520C>A  | Missense Mutation | LSM14B  | p.S315Y  | LSM14B, SCD6 homolo 31 (0.00)       | 33 (0.67)  | 1.78 |
| 12-03 | Gp3 | g.chr14:74971527G>A  | Silent            | LTBP2   | p.Y1425Y | latent transforming grow 31 (0.00)  | 67 (0.18)  | 0.48 |
| 12-03 | Gp3 | g.chr21:30343592C>T  | Splice Site       | LTN1    |          | listerin E3 ubiquitin pro 17 (0.00) | 19 (0.95)  | 2.53 |
| 12-03 | Gp3 | g.chr22:21337335G>A  | Missense Mutation | LZTR1   | p.V74M   | leucine-zipper-like trans 28 (0.00) | 172 (0.12) | 0.47 |
| 12-03 | Gp3 | g.chr1:39753017G>A   | Missense Mutation | MACF1   | p.R528Q  | microtubule-actin crossl 36 (0.00)  | 13 (0.62)  | 1.64 |
| 12-03 | Gp3 | g.chr1:39853268G>A   | Nonsense Mutation | MACF1   | p.W4923* | microtubule-actin crossl 16 (0.00)  | 13 (0.38)  | 1.03 |
| 12-03 | Gp3 | g.chr11:63919788G>T  | Missense Mutation | MACROD1 | p.P126T  | MACRO domain conta 20 (0.00)        | 88 (0.32)  | 0.85 |
| 12-03 | Gp3 | g.chr7:77695969G>C   | Intron            | MAGI2   |          | membrane associated gu 39 (0.03)    | 15 (0.47)  | 1.24 |
| 12-03 | Gp3 | g.chr7:77738387C>T   | Intron            | MAGI2   |          | membrane associated gu 41 (0.02)    | 80 (0.56)  | 1.50 |
| 12-03 | Gp3 | g.chr7:77741822A>G   | Intron            | MAGI2   |          | membrane associated gu 35 (0.00)    | 97 (0.14)  | 0.38 |
| 12-03 | Gp3 | g.chr7:77770678C>T   | Intron            | MAGI2   |          | membrane associated gu 24 (0.00)    | 15 (0.33)  | 0.89 |
| 12-03 | Gp3 | g.chr7:77791478G>C   | Intron            | MAGI2   |          | membrane associated gu 217 (0.00)   | 51 (0.61)  | 1.62 |
| 12-03 | Gp3 | g.chr7:77810564G>A   | Intron            | MAGI2   |          | membrane associated gu 32 (0.00)    | 24 (0.42)  | 1.11 |
| 12-03 | Gp3 | g.chr7:77838934C>T   | Intron            | MAGI2   |          | membrane associated gu 34 (0.00)    | 29 (0.17)  | 0.46 |
| 12-03 | Gp3 | g.chr7:77890734C>A   | Intron            | MAGI2   |          | membrane associated gu 69 (0.01)    | 15 (0.53)  | 1.42 |
| 12-03 | Gp3 | g.chr7:77916139T>C   | Intron            | MAGI2   |          | membrane associated gu 144 (0.00)   | 85 (0.26)  | 0.69 |
| 12-03 | Gp3 | g.chr7:77926466A>T   | Intron            | MAGI2   |          | membrane associated gu 78 (0.00)    | 25 (0.24)  | 0.64 |
| 12-03 | Gp3 | g.chr7:78011141T>C   | Intron            | MAGI2   |          | membrane associated gu 91 (0.00)    | 13 (0.38)  | 1.03 |
| 12-03 | Gp3 | g.chr7:78045083C>T   | Intron            | MAGI2   |          | membrane associated gu 44 (0.00)    | 53 (0.96)  | 2.57 |

|       |     |                      |                   |        |          |                          |            |            |      |
|-------|-----|----------------------|-------------------|--------|----------|--------------------------|------------|------------|------|
| 12-03 | Gp3 | g.chr7:78131712A>T   | Intron            | MAGI2  |          | membrane associated gu   | 33 (0.00)  | 27 (0.26)  | 0.69 |
| 12-03 | Gp3 | g.chr7:78164827T>C   | Intron            | MAGI2  |          | membrane associated gu   | 45 (0.00)  | 29 (0.31)  | 0.83 |
| 12-03 | Gp3 | g.chr7:78413195G>A   | Intron            | MAGI2  |          | membrane associated gu   | 33 (0.00)  | 80 (0.81)  | 2.17 |
| 12-03 | Gp3 | g.chr7:78415267G>A   | Intron            | MAGI2  |          | membrane associated gu   | 32 (0.00)  | 23 (0.52)  | 1.39 |
| 12-03 | Gp3 | g.chr7:78619303C>T   | Intron            | MAGI2  |          | membrane associated gu   | 27 (0.00)  | 11 (0.55)  | 1.45 |
| 12-03 | Gp3 | g.chr7:78625389C>T   | Intron            | MAGI2  |          | membrane associated gu   | 16 (0.00)  | 26 (0.23)  | 0.62 |
| 12-03 | Gp3 | g.chr7:78645532C>A   | Intron            | MAGI2  |          | membrane associated gu   | 49 (0.00)  | 14 (0.50)  | 1.33 |
| 12-03 | Gp3 | g.chr7:78790622G>A   | Intron            | MAGI2  |          | membrane associated gu   | 77 (0.00)  | 16 (0.81)  | 2.17 |
| 12-03 | Gp3 | g.chr7:78916533C>T   | Intron            | MAGI2  |          | membrane associated gu   | 74 (0.00)  | 113 (0.64) | 1.70 |
| 12-03 | Gp3 | g.chr7:78941087G>A   | Intron            | MAGI2  |          | membrane associated gu   | 39 (0.00)  | 193 (0.17) | 0.44 |
| 12-03 | Gp3 | g.chr7:78973435A>T   | Intron            | MAGI2  |          | membrane associated gu   | 63 (0.00)  | 10 (0.80)  | 2.13 |
| 12-03 | Gp3 | g.chr7:78981162T>A   | Intron            | MAGI2  |          | membrane associated gu   | 77 (0.00)  | 14 (0.36)  | 0.95 |
| 12-03 | Gp3 | g.chr7:78994867G>T   | Intron            | MAGI2  |          | membrane associated gu   | 111 (0.00) | 24 (0.71)  | 1.89 |
| 12-03 | Gp3 | g.chr7:79029435C>T   | Intron            | MAGI2  |          | membrane associated gu   | 19 (0.00)  | 54 (0.98)  | 2.62 |
| 12-03 | Gp3 | g.chr7:79081101G>A   | Intron            | MAGI2  |          | membrane associated gu   | 33 (0.00)  | 31 (0.19)  | 0.52 |
| 12-03 | Gp3 | g.chr11:65265490G>A  | lincRNA           | MALAT1 |          | metastasis associated lu | 23 (0.00)  | 257 (0.26) | 0.97 |
| 12-03 | Gp3 | g.chr11:65272573G>A  | lincRNA           | MALAT1 |          | metastasis associated lu | 37 (0.03)  | 70 (0.36)  | 1.32 |
| 12-03 | Gp3 | g.chr15:91461446G>A  | Missense Mutation | MAN2A2 | p.S1006N | mannosidase, alpha, cla  | 24 (0.00)  | 69 (0.51)  | 1.35 |
| 12-03 | Gp3 | g.chr4:103611779C>G  | Missense Mutation | MANBA  | p.V275L  | mannosidase, beta A, ly  | 20 (0.00)  | 22 (0.50)  | 1.33 |
| 12-03 | Gp3 | g.chr15:43815595G>T  | Nonsense Mutation | MAP1A  | p.E880*  | microtubule-associated j | 19 (0.00)  | 56 (0.66)  | 1.76 |
| 12-03 | Gp3 | g.chr15:43818745G>A  | Missense Mutation | MAP1A  | p.E1930K | microtubule-associated j | 44 (0.00)  | 52 (0.44)  | 1.18 |
| 12-03 | Gp3 | g.chr6:137019627C>T  | Splice Site       | MAP3K5 | p.S269N  | mitogen-activated protei | 31 (0.00)  | 20 (0.65)  | 1.73 |
| 12-03 | Gp3 | g.chr3:47910732G>T   | Missense Mutation | MAP4   | p.A2127E | microtubule-associated j | 20 (0.00)  | 95 (0.27)  | 0.73 |
| 12-03 | Gp3 | g.chr3:47951053C>A   | Missense Mutation | MAP4   | p.V1637F | microtubule-associated j | 35 (0.00)  | 17 (0.76)  | 2.04 |
| 12-03 | Gp3 | g.chr12:58152446C>T  | Silent            | MARCH9 | p.D269D  | membrane-associated ri   | 28 (0.00)  | 76 (0.16)  | 0.42 |
| 12-03 | Gp3 | g.chr3:186954276G>A  | Silent            | MASP1  | p.F348F  | mannan-binding lectin s  | 26 (0.00)  | 96 (0.16)  | 0.42 |
| 12-03 | Gp3 | g.chr1:46491395G>A   | Silent            | MAST2  | p.V609V  | microtubule associated   | 51 (0.00)  | 19 (0.89)  | 2.39 |
| 12-03 | Gp3 | g.chr10:27462131C>A  | Silent            | MASTL  | p.R737R  | microtubule associated   | 91 (0.00)  | 29 (0.31)  | 0.83 |
| 12-03 | Gp3 | g.chr8:99015924G>T   | Nonsense Mutation | MATN2  | p.E414*  | matrilin 2               | 15 (0.00)  | 24 (0.92)  | 2.44 |
| 12-03 | Gp3 | g.chr5:138643226C>T  | Missense Mutation | MATR3  | p.S41F   | matrin 3                 | 27 (0.00)  | 36 (0.69)  | 1.85 |
| 12-03 | Gp3 | g.chr16:84088135G>A  | Silent            | MBTPS1 | p.S1026S | membrane-bound transc    | 16 (0.00)  | 195 (0.14) | 0.38 |
| 12-03 | Gp3 | g.chr13:113738348C>A | Nonsense Mutation | MCF2L  | p.C676*  | MCF.2 cell line derived  | 34 (0.00)  | 163 (0.29) | 0.79 |
| 12-03 | Gp3 | g.chr3:127338061C>A  | Silent            | MCM2   | p.L735L  | minichromosome mainte    | 18 (0.00)  | 209 (0.22) | 0.60 |
| 12-03 | Gp3 | g.chr21:47705176C>T  | Missense Mutation | MCM3AP | p.G9R    | minichromosome mainte    | 85 (0.00)  | 197 (0.17) | 0.63 |
| 12-03 | Gp3 | g.chr1:85498408G>A   | Missense Mutation | MCOLN3 | p.L235F  | mucolipin 3              | 104 (0.00) | 165 (0.96) | 2.57 |

|       |     |                      |                   |          |           |                           |             |            |      |
|-------|-----|----------------------|-------------------|----------|-----------|---------------------------|-------------|------------|------|
| 12-03 | Gp3 | g.chr6:41617363C>A   | Missense Mutation | MDFI     | p.P28H    | MyoD family inhibitor     | 24 (0.00)   | 34 (0.26)  | 0.71 |
| 12-03 | Gp3 | g.chrX:153296800G>A  | Missense Mutation | MECP2    | p.T160I   | methyl CpG binding prc    | 21 (0.00)   | 74 (0.23)  | 0.38 |
| 12-03 | Gp3 | g.chr1:28661384C>A   | Missense Mutation | MED18    | p.A177D   | mediator complex subur    | 28 (0.00)   | 28 (0.79)  | 2.10 |
| 12-03 | Gp3 | g.chr2:112722818C>T  | Silent            | MERTK    | p.L270L   | MER proto-oncogene, t     | 17 (0.00)   | 37 (0.41)  | 1.08 |
| 12-03 | Gp3 | g.chr7:116381016G>A  | Silent            | MET      | p.V546V   | MET proto-oncogene, r     | 67 (0.00)   | 67 (0.61)  | 1.63 |
| 12-03 | Gp3 | g.chr17:74729198C>T  | Nonsense Mutation | METTTL23 | p.Q75*    | methyltransferase like    | 2 92 (0.00) | 18 (0.28)  | 0.74 |
| 12-03 | Gp3 | g.chr15:89449895C>T  | Missense Mutation | MFGE8    | p.E168K   | milk fat globule-EGF fa   | 16 (0.00)   | 53 (0.83)  | 2.21 |
| 12-03 | Gp3 | g.chr1:12069697C>A   | Silent            | MFN2     | p.T706T   | mitofusin 2               | 27 (0.00)   | 86 (0.17)  | 0.47 |
| 12-03 | Gp3 | g.chr1:40422854G>A   | Silent            | MFSD2A   | p.L63L    | major facilitator superfa | 39 (0.00)   | 38 (0.76)  | 2.04 |
| 12-03 | Gp3 | g.chr1:205555320G>A  | Missense Mutation | MFSD4    | p.M378I   | major facilitator superfa | 21 (0.00)   | 35 (0.20)  | 0.43 |
| 12-03 | Gp3 | g.chr16:14339488C>T  | Missense Mutation | MKL2     | p.P395S   | MKL/myocardin-like 2      | 35 (0.00)   | 99 (0.60)  | 1.23 |
| 12-03 | Gp3 | g.chr14:75489567C>T  | Missense Mutation | MLH3     | p.G1347E  | mutL homolog 3            | 61 (0.02)   | 78 (0.22)  | 0.58 |
| 12-03 | Gp3 | g.chr1:233498008C>A  | Silent            | MLK4     | p.L507L   |                           | 38 (0.00)   | 37 (0.73)  | 1.95 |
| 12-03 | Gp3 | g.chr16:58074478C>G  | Silent            | MMP15    | p.G262G   | matrix metallopeptidase   | 27 (0.00)   | 313 (0.20) | 0.55 |
| 12-03 | Gp3 | g.chr14:93650221C>T  | Missense Mutation | MOAP1    | p.A123T   | modulator of apoptosis    | 46 (0.02)   | 210 (0.15) | 0.39 |
| 12-03 | Gp3 | g.chr15:79186416G>T  | Nonsense Mutation | MORF4L1  | p.E241*   | mortality factor 4 like 1 | 38 (0.00)   | 9 (0.56)   | 1.48 |
| 12-03 | Gp3 | g.chr17:41960303C>G  | Missense Mutation | MPP2     | p.V158L   | membrane protein, palm    | 72 (0.00)   | 213 (0.43) | 0.81 |
| 12-03 | Gp3 | g.chr14:67799615G>A  | Missense Mutation | MPP5     | p.R657K   | membrane protein, palm    | 27 (0.00)   | 21 (0.86)  | 2.29 |
| 12-03 | Gp3 | g.chr1:54665952A>G   | Silent            | MRPL37   | p.L12L    | mitochondrial ribosoma    | 17 (0.00)   | 109 (0.16) | 0.42 |
| 12-03 | Gp3 | g.chr10:75011562C>T  | Missense Mutation | MRPS16   | p.G78D    | mitochondrial ribosoma    | 70 (0.00)   | 113 (0.50) | 1.32 |
| 12-03 | Gp3 | g.chr2:48023682C>A   | Intron            | MSH6     |           | mutS homolog 6            | 29 (0.00)   | 51 (0.45)  | 1.20 |
| 12-03 | Gp3 | g.chr14:105920584G>A | Missense Mutation | MTA1     | p.D146N   | metastasis associated 1   | 21 (0.00)   | 147 (0.18) | 0.47 |
| 12-03 | Gp3 | g.chr8:11172573G>T   | Splice Site       | MTMR9    | p.Q286H   | myotubularin related pr   | 81 (0.01)   | 142 (0.34) | 0.90 |
| 12-03 | Gp3 | g.chr7:100616205A>G  | Silent            | MUC12    | p.R56R    | mucin 12, cell surface a: | 34 (0.00)   | 33 (0.27)  | 0.73 |
| 12-03 | Gp3 | g.chr7:100643821C>A  | Missense Mutation | MUC12    | p.S3469Y  | mucin 12, cell surface a: | 433 (0.00)  | 192 (0.21) | 0.57 |
| 12-03 | Gp3 | g.chr19:9028332C>A   | Missense Mutation | MUC16    | p.D12154Y | mucin 16, cell surface a: | 41 (0.00)   | 84 (0.40)  | 1.08 |
| 12-03 | Gp3 | g.chr19:9048971G>T   | Missense Mutation | MUC16    | p.A10887E | mucin 16, cell surface a: | 43 (0.00)   | 73 (0.26)  | 0.69 |
| 12-03 | Gp3 | g.chr19:9049125G>A   | Missense Mutation | MUC16    | p.P10836S | mucin 16, cell surface a: | 184 (0.00)  | 97 (0.70)  | 1.87 |
| 12-03 | Gp3 | g.chr19:9056358G>C   | Missense Mutation | MUC16    | p.T10363S | mucin 16, cell surface a: | 34 (0.00)   | 95 (0.22)  | 0.59 |
| 12-03 | Gp3 | g.chr19:9056407C>T   | Missense Mutation | MUC16    | p.A10347T | mucin 16, cell surface a: | 29 (0.00)   | 71 (0.31)  | 0.83 |
| 12-03 | Gp3 | g.chr19:9061641G>A   | Missense Mutation | MUC16    | p.T8602I  | mucin 16, cell surface a: | 76 (0.00)   | 76 (0.16)  | 0.42 |
| 12-03 | Gp3 | g.chr19:9063147G>T   | Missense Mutation | MUC16    | p.T8100K  | mucin 16, cell surface a: | 39 (0.00)   | 24 (0.92)  | 2.44 |
| 12-03 | Gp3 | g.chr19:9068127G>A   | Missense Mutation | MUC16    | p.S6440F  | mucin 16, cell surface a: | 35 (0.00)   | 85 (0.80)  | 2.13 |
| 12-03 | Gp3 | g.chr19:9076162C>T   | Missense Mutation | MUC16    | p.E3762K  | mucin 16, cell surface a: | 111 (0.00)  | 110 (0.35) | 0.92 |
| 12-03 | Gp3 | g.chr19:9082356C>T   | Silent            | MUC16    | p.K3153K  | mucin 16, cell surface a: | 18 (0.00)   | 15 (0.33)  | 0.89 |

|       |     |                      |                   |          |          |                                        |            |      |
|-------|-----|----------------------|-------------------|----------|----------|----------------------------------------|------------|------|
| 12-03 | Gp3 | g.chr19:9085795G>T   | Missense Mutation | MUC16    | p.S2007Y | mucin 16, cell surface a:61 (0.02)     | 84 (0.74)  | 1.97 |
| 12-03 | Gp3 | g.chr19:9085919G>A   | Missense Mutation | MUC16    | p.P1966S | mucin 16, cell surface a:99 (0.01)     | 25 (0.80)  | 2.13 |
| 12-03 | Gp3 | g.chr19:9091111G>T   | Missense Mutation | MUC16    | p.S235Y  | mucin 16, cell surface a:53 (0.00)     | 127 (0.20) | 0.55 |
| 12-03 | Gp3 | g.chr7:100677108G>T  | Missense Mutation | MUC17    | p.G804V  | mucin 17, cell surface a:39 (0.03)     | 32 (0.44)  | 1.17 |
| 12-03 | Gp3 | g.chr7:100678672C>G  | Silent            | MUC17    | p.T1325T | mucin 17, cell surface a:54 (0.00)     | 21 (0.62)  | 1.65 |
| 12-03 | Gp3 | g.chr7:100678718A>G  | Missense Mutation | MUC17    | p.S1341G | mucin 17, cell surface a:70 (0.00)     | 21 (0.33)  | 0.89 |
| 12-03 | Gp3 | g.chr11:1094770C>A   | Missense Mutation | MUC2     | p.S1953Y | mucin 2, oligomeric mu 39 (0.00)       | 486 (0.14) | 0.38 |
| 12-03 | Gp3 | g.chr11:1094771C>A   | Silent            | MUC2     | p.S1953S | mucin 2, oligomeric mu 40 (0.00)       | 482 (0.15) | 0.39 |
| 12-03 | Gp3 | g.chr3:195474218G>A  | Silent            | MUC4     | p.G1120G | mucin 4, cell surface ass 27 (0.00)    | 222 (0.27) | 0.71 |
| 12-03 | Gp3 | g.chr11:1016403G>A   | Missense Mutation | MUC6     | p.P2133L | mucin 6, oligomeric mu 39 (0.00)       | 46 (0.74)  | 1.97 |
| 12-03 | Gp3 | g.chr12:102067331G>C | Missense Mutation | MYBPC1   | p.G907R  | myosin binding protein 156 (0.00)      | 51 (0.24)  | 0.63 |
| 12-03 | Gp3 | g.chr13:77672413C>G  | Missense Mutation | MYCBP2   | p.S2921T | MYC binding protein 2, 79 (0.00)       | 52 (0.42)  | 1.13 |
| 12-03 | Gp3 | g.chr17:48603275C>A  | Missense Mutation | MYCBPAP  | p.H649N  | MYCBP associated prot 62 (0.00)        | 80 (0.23)  | 0.60 |
| 12-03 | Gp3 | g.chr17:10213100C>A  | Missense Mutation | MYH13    | p.E1568D | myosin, heavy chain 13, 18 (0.00)      | 80 (0.74)  | 1.97 |
| 12-03 | Gp3 | g.chr17:10258045C>T  | Silent            | MYH13    | p.E319E  | myosin, heavy chain 13, 27 (0.00)      | 18 (0.61)  | 1.63 |
| 12-03 | Gp3 | g.chr19:50720907G>A  | Silent            | MYH14    | p.P147P  | myosin, heavy chain 14, 45 (0.00)      | 125 (0.11) | 0.40 |
| 12-03 | Gp3 | g.chr14:23893195G>T  | Nonsense Mutation | MYH7     | p.S948*  | myosin, heavy chain 7, 21 (0.00)       | 13 (0.85)  | 1.77 |
| 12-03 | Gp3 | g.chr20:30414434C>A  | Silent            | MYLK2    | p.V333V  | myosin light chain kinase 15 (0.00)    | 24 (0.25)  | 0.67 |
| 12-03 | Gp3 | g.chr2:171264264G>A  | Missense Mutation | MYO3B    | p.D854N  | myosin IIIB 138 (0.00)                 | 45 (0.31)  | 0.83 |
| 12-03 | Gp3 | g.chr2:128341745C>A  | Missense Mutation | MYO7B    | p.F464L  | myosin VIIB 37 (0.00)                  | 121 (0.15) | 0.40 |
| 12-03 | Gp3 | g.chr15:72180387G>A  | Missense Mutation | MYO9A    | p.T1738I | myosin IXA 31 (0.00)                   | 86 (0.41)  | 1.09 |
| 12-03 | Gp3 | g.chr17:12656345T>C  | Silent            | MYOCD    | p.P580P  | myocardin 25 (0.00)                    | 104 (0.15) | 0.41 |
| 12-03 | Gp3 | g.chr11:64815634G>C  | Missense Mutation | NAALADL1 | p.I405M  | N-acetylated alpha-linker 19 (0.00)    | 206 (0.12) | 0.43 |
| 12-03 | Gp3 | g.chr4:164054346A>G  | Silent            | NAF1     | p.I331I  | nuclear assembly factor 24 (0.00)      | 33 (0.15)  | 0.40 |
| 12-03 | Gp3 | g.chr19:50862309C>T  | Missense Mutation | NAPSA    | p.G332R  | napsin A aspartic peptidase 29 (0.00)  | 86 (0.26)  | 0.91 |
| 12-03 | Gp3 | g.chr12:78522592T>A  | Missense Mutation | NAV3     | p.S1463T | neuron navigator 3 25 (0.00)           | 80 (0.20)  | 0.53 |
| 12-03 | Gp3 | g.chr13:35770243G>A  | Missense Mutation | NBEA     | p.E1721K | neurobeachin 132 (0.00)                | 17 (0.35)  | 0.94 |
| 12-03 | Gp3 | g.chr3:47049370C>A   | Silent            | NBEAL2   | p.T2524T | neurobeachin-like 2 23 (0.00)          | 105 (0.14) | 0.38 |
| 12-03 | Gp3 | g.chr1:16914274T>A   | Missense Mutation | NBPF1    | p.D171V  | neuroblastoma breakpoint 102 (0.00)    | 39 (0.15)  | 0.41 |
| 12-03 | Gp3 | g.chr1:146401749T>A  | Missense Mutation | NBPF12   | p.M286K  | neuroblastoma breakpoint 77 (0.00)     | 75 (0.39)  | 1.03 |
| 12-03 | Gp3 | g.chr1:148251901G>T  | Missense Mutation | NBPF20   | p.Q4614K | neuroblastoma breakpoint 51 (0.00)     | 85 (0.18)  | 0.47 |
| 12-03 | Gp3 | g.chr1:144220791A>T  | Missense Mutation | NBPF8    | p.S20C   | neuroblastoma breakpoint 38 (0.00)     | 28 (0.21)  | 0.57 |
| 12-03 | Gp3 | g.chr17:41345270G>A  | Splice Site       | NBR1     | p.K411K  | neighbor of BRCA1 gene 67 (0.00)       | 18 (0.44)  | 0.83 |
| 12-03 | Gp3 | g.chr7:158443536G>A  | Silent            | NCAPG2   | p.H1021H | non-SMC condensin II subunit 41 (0.00) | 28 (0.96)  | 2.57 |
| 12-03 | Gp3 | g.chr7:158485576C>A  | Nonsense Mutation | NCAPG2   | p.E114*  | non-SMC condensin II subunit 32 (0.00) | 24 (0.58)  | 1.56 |

|       |     |                     |                   |         |          |                           |             |            |      |
|-------|-----|---------------------|-------------------|---------|----------|---------------------------|-------------|------------|------|
| 12-03 | Gp3 | g.chr2:97031743G>T  | Nonsense Mutation | NCAPH   | p.G599*  | non-SMC condensin I c     | 56 (0.00)   | 31 (0.42)  | 1.12 |
| 12-03 | Gp3 | g.chr12:54914948C>A | Missense Mutation | NCKAP1L | p.L602M  | NCK-associated protein 18 | (0.00)      | 44 (0.20)  | 0.55 |
| 12-03 | Gp3 | g.chr20:46262893G>A | Missense Mutation | NCOA3   | p.V356I  | nuclear receptor coactiv  | 19 (0.00)   | 72 (0.82)  | 2.19 |
| 12-03 | Gp3 | g.chr6:126206490G>A | Splice Site       | NCOA7   |          | nuclear receptor coactiv  | 26 (0.00)   | 28 (0.57)  | 1.52 |
| 12-03 | Gp3 | g.chr19:55418091G>T | Missense Mutation | NCR1    | p.G94V   | natural cytotoxicity trig | 15 (0.00)   | 104 (0.24) | 0.64 |
| 12-03 | Gp3 | g.chr1:54273410G>A  | Silent            | NDC1    | p.L270L  | NDC1 transmembrane n      | 34 (0.03)   | 306 (0.54) | 1.43 |
| 12-03 | Gp3 | g.chr10:75564553G>A | Silent            | NDST2   | p.L607L  | N-deacetylase/N-sulfotr   | 39 (0.00)   | 13 (0.46)  | 1.23 |
| 12-03 | Gp3 | g.chr7:140421480C>T | Missense Mutation | NDUFB2  | p.P76L   | NADH dehydrogenase (38    | (0.00)      | 24 (0.96)  | 2.56 |
| 12-03 | Gp3 | g.chr2:206991475C>T | Missense Mutation | NDUFS1  | p.E660K  | NADH dehydrogenase (25    | (0.00)      | 15 (0.47)  | 1.24 |
| 12-03 | Gp3 | g.chr15:56208054G>A | Missense Mutation | NEDD4   | p.L326F  | neural precursor cell ex  | 24 (0.00)   | 46 (0.37)  | 0.99 |
| 12-03 | Gp3 | g.chr4:170477213G>A | Missense Mutation | NEK1    | p.P434S  | NIMA-related kinase 1     | 41 (0.00)   | 109 (0.96) | 2.57 |
| 12-03 | Gp3 | g.chr3:52778283C>A  | Missense Mutation | NEK4    | p.K576N  | NIMA-related kinase 4     | 39 (0.00)   | 109 (0.40) | 1.08 |
| 12-03 | Gp3 | g.chr11:21594918C>T | Missense Mutation | NELL1   | p.T782M  | NEL-like 1 (chicken)      | 39 (0.00)   | 49 (0.43)  | 1.14 |
| 12-03 | Gp3 | g.chr17:7224197C>T  | Missense Mutation | NEURL4  | p.E1136K | neuralized E3 ubiquitin   | 58 (0.00)   | 220 (0.28) | 0.60 |
| 12-03 | Gp3 | g.chr17:7225047T>C  | Silent            | NEURL4  | p.T977T  | neuralized E3 ubiquitin   | 29 (0.00)   | 157 (0.20) | 0.43 |
| 12-03 | Gp3 | g.chr19:39395662C>A | Missense Mutation | NFKBIB  | p.H63N   | nuclear factor of kappa   | 199 (0.00)  | 95 (0.61)  | 2.26 |
| 12-03 | Gp3 | g.chr1:115828991C>T | Nonsense Mutation | NGF     | p.W142*  | nerve growth factor (bet  | 33 (0.00)   | 90 (0.16)  | 0.41 |
| 12-03 | Gp3 | g.chr5:36962287T>G  | Missense Mutation | NIPBL   | p.V174G  | Nipped-B homolog (Drc     | 16 (0.00)   | 19 (0.53)  | 1.40 |
| 12-03 | Gp3 | g.chrX:118724452C>T | Silent            | NKRF    | p.K312K  | NFKB repressing factor    | 23 (0.00)   | 45 (0.47)  | 0.78 |
| 12-03 | Gp3 | g.chr11:7981840C>G  | Missense Mutation | NLRP10  | p.G440A  | NLR family, pyrin dom     | 30 (0.00)   | 41 (0.68)  | 1.35 |
| 12-03 | Gp3 | g.chr3:160942774C>G | Missense Mutation | NMD3    | p.A34G   | NMD3 ribosome export      | 63 (0.00)   | 101 (0.40) | 1.06 |
| 12-03 | Gp3 | g.chr17:65733982G>T | Nonsense Mutation | NOL11   | p.E475*  | nucleolar protein 11      | 28 (0.00)   | 28 (0.54)  | 1.43 |
| 12-03 | Gp3 | g.chr20:2635091G>T  | Missense Mutation | NOP56   | p.L80F   | NOP56 ribonucleoprote     | 45 (0.00)   | 29 (0.24)  | 0.64 |
| 12-03 | Gp3 | g.chr20:2635401G>A  | Missense Mutation | NOP56   | p.R126H  | NOP56 ribonucleoprote     | 110 (0.01)  | 398 (0.36) | 0.95 |
| 12-03 | Gp3 | g.chr1:5923353G>A   | Missense Mutation | NPHP4   | p.A1418V | nephronophthisis 4        | 85 (0.00)   | 305 (0.29) | 0.77 |
| 12-03 | Gp3 | g.chr16:29394442C>T | Missense Mutation | NP1PB11 | p.S604N  | nuclear pore complex in   | 178 (0.00)  | 115 (0.15) | 0.39 |
| 12-03 | Gp3 | g.chr16:29394444C>T | Silent            | NP1PB11 | p.P603P  | nuclear pore complex in   | 180 (0.00)  | 113 (0.15) | 0.40 |
| 12-03 | Gp3 | g.chr17:38250185G>A | Missense Mutation | NR1D1   | p.A542V  | nuclear receptor subfam   | 37 (0.00)   | 125 (0.30) | 0.81 |
| 12-03 | Gp3 | g.chr19:19313142G>A | Nonsense Mutation | NR2C2AP | p.Q101*  | nuclear receptor 2C2-as   | 85 (0.00)   | 231 (0.19) | 0.67 |
| 12-03 | Gp3 | g.chr9:102590455G>C | Missense Mutation | NR4A3   | p.S44T   | nuclear receptor subfam   | 47 (0.00)   | 240 (0.23) | 0.60 |
| 12-03 | Gp3 | g.chr1:200017627T>C | Missense Mutation | NR5A2   | p.F264S  | nuclear receptor subfam   | 96 (0.00)   | 36 (0.22)  | 0.59 |
| 12-03 | Gp3 | g.chr2:27664599C>T  | Silent            | NRBP1   | p.L510L  | nuclear receptor binding  | 113 (0.00)  | 369 (0.44) | 1.18 |
| 12-03 | Gp3 | g.chr1:52266242G>A  | Silent            | NRD1    | p.P877P  | nardilysin (N-arginine    | d 58 (0.00) | 87 (0.67)  | 1.78 |
| 12-03 | Gp3 | g.chr14:90764725C>A | Splice Site       | NRDE2   |          | NRDE-2, necessary for     | 25 (0.00)   | 35 (0.14)  | 0.38 |
| 12-03 | Gp3 | g.chr7:129350236G>A | Missense Mutation | NRF1    | p.R263Q  | nuclear respiratory facto | 66 (0.00)   | 65 (0.37)  | 0.98 |



|       |     |                      |                   |         |          |                                 |             |            |      |
|-------|-----|----------------------|-------------------|---------|----------|---------------------------------|-------------|------------|------|
| 12-03 | Gp3 | g.chr5:173473835C>T  | Missense Mutation | NSG2    | p.P26L   |                                 | 25 (0.00)   | 16 (0.69)  | 1.83 |
| 12-03 | Gp3 | g.chr9:132397728C>T  | Silent            | NTMT1   | p.S219S  | N-terminal Xaa-Pro-Lys          | 18 (0.00)   | 73 (0.34)  | 0.91 |
| 12-03 | Gp3 | g.chr12:106461034C>A | Missense Mutation | NUAK1   | p.R511M  | NUAK family, SNF1-like          | 40 (0.00)   | 196 (0.16) | 0.44 |
| 12-03 | Gp3 | g.chr1:153973460G>C  | Missense Mutation | NUP210L | p.S1753C | nucleoporin 210kDa-like         | 64 (0.02)   | 80 (0.36)  | 0.77 |
| 12-03 | Gp3 | g.chr1:153995680G>T  | Missense Mutation | NUP210L | p.L1406I | nucleoporin 210kDa-like         | 48 (0.00)   | 34 (0.26)  | 0.56 |
| 12-03 | Gp3 | g.chr9:134008581G>T  | Silent            | NUP214  | p.V272V  | nucleoporin 214kDa              | 50 (0.00)   | 30 (0.73)  | 1.96 |
| 12-03 | Gp3 | g.chr12:113400461C>T | Missense Mutation | OAS3    | p.A613V  | 2'-5'-oligoadenylate synthetase | 84 (0.01)   | 94 (0.24)  | 0.65 |
| 12-03 | Gp3 | g.chr1:228433208G>C  | Missense Mutation | OBSCN   | p.Q1284H | obscurin, cytoskeletal c        | 68 (0.00)   | 37 (0.54)  | 1.44 |
| 12-03 | Gp3 | g.chr17:29622212G>A  | Silent            | OMG     | p.L380L  | oligodendrocyte myelin          | 20 (0.00)   | 22 (0.50)  | 1.33 |
| 12-03 | Gp3 | g.chr22:16449261G>A  | Missense Mutation | OR11H1  | p.P182S  | olfactory receptor, famil       | 97 (0.00)   | 36 (0.94)  | 2.52 |
| 12-03 | Gp3 | g.chr22:16449670G>T  | Silent            | OR11H1  | p.L45L   | olfactory receptor, famil       | 145 (0.00)  | 162 (0.54) | 1.43 |
| 12-03 | Gp3 | g.chr9:107380318G>A  | Silent            | OR13C9  | p.H56H   | olfactory receptor, famil       | 29 (0.00)   | 51 (0.39)  | 1.05 |
| 12-03 | Gp3 | g.chr1:247902370G>A  | Missense Mutation | OR14K1  | p.A152T  | olfactory receptor, famil       | 30 (0.00)   | 65 (0.25)  | 0.66 |
| 12-03 | Gp3 | g.chr17:3181747G>C   | Silent            | OR3A2   | p.A161A  | olfactory receptor, famil       | 15 (0.00)   | 27 (0.22)  | 0.59 |
| 12-03 | Gp3 | g.chr17:56233241C>T  | Missense Mutation | OR4D1   | p.H243Y  | olfactory receptor, famil       | 26 (0.00)   | 46 (0.89)  | 2.38 |
| 12-03 | Gp3 | g.chr14:22133982C>G  | Nonsense Mutation | OR4E2   | p.S229*  | olfactory receptor, famil       | 26 (0.00)   | 69 (0.83)  | 1.73 |
| 12-03 | Gp3 | g.chr11:5968768C>G   | Nonsense Mutation | OR56A3  | p.Y64*   | olfactory receptor, famil       | 18 (0.00)   | 26 (0.27)  | 0.44 |
| 12-03 | Gp3 | g.chr9:125551593G>T  | Missense Mutation | OR5C1   | p.V128L  | olfactory receptor, famil       | 84 (0.00)   | 216 (0.25) | 0.68 |
| 12-03 | Gp3 | g.chr18:21957416T>C  | Missense Mutation | OSBPL1A | p.M28V   | oxysterol binding protei        | 16 (0.00)   | 14 (0.36)  | 0.95 |
| 12-03 | Gp3 | g.chr1:36904390G>T   | Silent            | OSCP1   | p.S33S   | organic solute carrier pa       | 48 (0.00)   | 92 (0.14)  | 0.38 |
| 12-03 | Gp3 | g.chr17:79804873C>T  | Missense Mutation | P4HB    | p.D225N  | prolyl 4-hydroxylase, be        | 41 (0.00)   | 412 (0.30) | 1.12 |
| 12-03 | Gp3 | g.chr8:101716597G>A  | Silent            | PABPC1  | p.L614L  | poly(A) binding protein.        | 57 (0.00)   | 17 (0.29)  | 0.78 |
| 12-03 | Gp3 | g.chr13:25671613G>A  | Missense Mutation | PABPC3  | p.R426K  | poly(A) binding protein.        | 90 (0.00)   | 80 (0.40)  | 1.07 |
| 12-03 | Gp3 | g.chr1:17555135C>T   | Missense Mutation | PADI1   | p.S223L  | peptidyl arginine deimir        | 45 (0.00)   | 103 (0.17) | 0.47 |
| 12-03 | Gp3 | g.chr1:17555157G>T   | Silent            | PADI1   | p.G230G  | peptidyl arginine deimir        | 52 (0.00)   | 107 (0.18) | 0.47 |
| 12-03 | Gp3 | g.chr2:71429663C>G   | Missense Mutation | PAIP2B  | p.Q19H   | poly(A) binding protein         | 54 (0.00)   | 127 (0.99) | 2.65 |
| 12-03 | Gp3 | g.chr19:14165076C>G  | Missense Mutation | PALM3   | p.G455R  | paralemmin 3                    | 19 (0.00)   | 30 (0.33)  | 1.17 |
| 12-03 | Gp3 | g.chr11:93911752G>A  | Missense Mutation | PANX1   | p.G180E  | pannexin 1                      | 23 (0.00)   | 68 (0.40)  | 1.06 |
| 12-03 | Gp3 | g.chr14:20824096C>T  | Missense Mutation | PARP2   | p.T336I  | poly (ADP-ribose) poly          | 155 (0.00)  | 28 (0.61)  | 1.27 |
| 12-03 | Gp3 | g.chr3:122247339C>T  | Missense Mutation | PARP9   | p.A813T  | poly (ADP-ribose) poly          | 122 (0.00)  | 21 (0.95)  | 1.94 |
| 12-03 | Gp3 | g.chr2:242066757G>A  | Missense Mutation | PASK    | p.P525S  | PAS domain containing           | 75 (0.00)   | 262 (0.15) | 0.41 |
| 12-03 | Gp3 | g.chr2:242075323G>T  | Missense Mutation | PASK    | p.D423E  | PAS domain containing           | 20 (0.00)   | 132 (0.42) | 1.11 |
| 12-03 | Gp3 | g.chr19:19680257C>A  | Splice Site       | PBX4    |          | pre-B-cell leukemia hon         | 25 (0.00)   | 16 (0.44)  | 1.50 |
| 12-03 | Gp3 | g.chr10:56138644G>T  | Silent            | PCDH15  | p.T72T   | protocadherin-related           | 1548 (0.00) | 17 (0.94)  | 2.51 |
| 12-03 | Gp3 | g.chr5:140235926G>A  | Missense Mutation | PCDHA10 | p.S98N   | protocadherin alpha 10          | 39 (0.00)   | 481 (0.19) | 0.51 |

|       |     |                     |                   |         |          |                          |            |            |      |
|-------|-----|---------------------|-------------------|---------|----------|--------------------------|------------|------------|------|
| 12-03 | Gp3 | g.chr5:140249766G>A | Missense Mutation | PCDHA11 | p.E360K  | protocadherin alpha 11   | 20 (0.00)  | 151 (0.46) | 1.24 |
| 12-03 | Gp3 | g.chr5:140502617T>C | Missense Mutation | PCDHB4  | p.L346P  | protocadherin beta 4     | 110 (0.00) | 140 (0.21) | 0.55 |
| 12-03 | Gp3 | g.chr5:140502697G>T | Missense Mutation | PCDHB4  | p.D373Y  | protocadherin beta 4     | 70 (0.00)  | 155 (0.32) | 0.86 |
| 12-03 | Gp3 | g.chr5:140558294G>A | Missense Mutation | PCDHB8  | p.A227T  | protocadherin beta 8     | 33 (0.00)  | 28 (0.68)  | 1.81 |
| 12-03 | Gp3 | g.chr5:140755146C>A | Missense Mutation | PCDHGA6 | p.A499E  | protocadherin gamma st   | 96 (0.00)  | 274 (0.27) | 0.71 |
| 12-03 | Gp3 | g.chr5:140773133C>T | Silent            | PCDHGA8 | p.V251V  | protocadherin gamma st   | 25 (0.00)  | 168 (0.21) | 0.57 |
| 12-03 | Gp3 | g.chr5:140774729G>T | Missense Mutation | PCDHGA8 | p.E783D  | protocadherin gamma st   | 57 (0.00)  | 62 (0.24)  | 0.65 |
| 12-03 | Gp3 | g.chr5:140783613T>G | Missense Mutation | PCDHGA9 | p.V365G  | protocadherin gamma st   | 18 (0.00)  | 39 (0.44)  | 1.16 |
| 12-03 | Gp3 | g.chr5:140750776G>T | Missense Mutation | PCDHGB3 | p.G272V  | protocadherin gamma st   | 183 (0.01) | 254 (0.23) | 0.62 |
| 12-03 | Gp3 | g.chr5:140750953G>A | Missense Mutation | PCDHGB3 | p.C331Y  | protocadherin gamma st   | 124 (0.00) | 141 (0.28) | 0.76 |
| 12-03 | Gp3 | g.chr5:140751956A>G | Silent            | PCDHGB3 | p.A665A  | protocadherin gamma st   | 34 (0.03)  | 161 (0.55) | 1.47 |
| 12-03 | Gp3 | g.chr5:140789966G>T | Missense Mutation | PCDHGB6 | p.V733F  | protocadherin gamma st   | 33 (0.00)  | 99 (0.28)  | 0.75 |
| 12-03 | Gp3 | g.chr7:82584247T>C  | Missense Mutation | PCLO    | p.T2008A | piccolo presynaptic cyto | 112 (0.00) | 38 (0.18)  | 0.49 |
| 12-03 | Gp3 | g.chr21:47831244C>T | Silent            | PCNT    | p.L1753L | pericentrin              | 20 (0.00)  | 397 (0.27) | 1.02 |
| 12-03 | Gp3 | g.chr15:65421503C>A | Missense Mutation | PDCD7   | p.Q292H  | programmed cell death    | 57 (0.00)  | 35 (0.40)  | 1.07 |
| 12-03 | Gp3 | g.chr9:125582601G>A | Silent            | PDCL    | p.G223G  | phosducin-like           | 37 (0.00)  | 12 (0.42)  | 1.11 |
| 12-03 | Gp3 | g.chr1:144881455C>T | Silent            | PDE4DIP | p.E1384E | phosphodiesterase 4D ir  | 87 (0.00)  | 57 (0.82)  | 2.20 |
| 12-03 | Gp3 | g.chr4:120549713C>T | Nonsense Mutation | PDE5A   | p.W38*   | phosphodiesterase 5A, c  | 30 (0.00)  | 107 (0.22) | 0.60 |
| 12-03 | Gp3 | g.chr5:149513155C>T | Missense Mutation | PDGFRB  | p.V310M  | platelet-derived growth  | 15 (0.00)  | 78 (0.83)  | 2.22 |
| 12-03 | Gp3 | g.chr4:39874689T>C  | Missense Mutation | PDS5A   | p.M785V  | PDS5, regulator of cohe  | 18 (0.00)  | 26 (0.35)  | 0.92 |
| 12-03 | Gp3 | g.chr16:70044698G>A | RNA               | PDXDC2P |          | pyridoxal-dependent dec  | 31 (0.00)  | 34 (0.18)  | 0.47 |
| 12-03 | Gp3 | g.chr7:94293076C>T  | Missense Mutation | PEG10   | p.P70S   | paternally expressed 10  | 47 (0.02)  | 56 (0.14)  | 0.38 |
| 12-03 | Gp3 | g.chr17:33903046G>A | Silent            | PEX12   | p.L279L  | peroxisomal biogenesis   | 40 (0.00)  | 14 (0.71)  | 1.90 |
| 12-03 | Gp3 | g.chr6:42932837C>T  | Missense Mutation | PEX6    | p.R881H  | peroxisomal biogenesis   | 55 (0.00)  | 37 (0.65)  | 1.73 |
| 12-03 | Gp3 | g.chr12:48536644G>T | Missense Mutation | PFKM    | p.G578V  | phosphofructokinase, m   | 71 (0.00)  | 31 (0.29)  | 0.77 |
| 12-03 | Gp3 | g.chr6:13228136C>A  | Missense Mutation | PHACTR1 | p.L359I  | phosphatase and actin re | 65 (0.00)  | 35 (0.69)  | 1.83 |
| 12-03 | Gp3 | g.chr5:125939285T>C | Silent            | PHAX    | p.A40A   | phosphorylated adaptor   | 23 (0.00)  | 21 (0.52)  | 1.40 |
| 12-03 | Gp3 | g.chr3:169847266C>T | Missense Mutation | PHC3    | p.V332I  | polyhomeotic homolog     | 138 (0.00) | 102 (0.38) | 1.02 |
| 12-03 | Gp3 | g.chr9:96425286C>T  | Missense Mutation | PHF2    | p.S599L  | PHD finger protein 2     | 86 (0.00)  | 26 (0.96)  | 2.56 |
| 12-03 | Gp3 | g.chr1:120277286A>T | Silent            | PHGDH   | p.P180P  | phosphoglycerate dehyd   | 105 (0.00) | 121 (0.24) | 0.64 |
| 12-03 | Gp3 | g.chr18:60384566C>A | Intron            | PHLPP1  |          | PH domain and leucine    | 58 (0.00)  | 242 (0.18) | 0.48 |
| 12-03 | Gp3 | g.chr18:60384723A>G | Intron            | PHLPP1  |          | PH domain and leucine    | 76 (0.00)  | 122 (0.15) | 0.39 |
| 12-03 | Gp3 | g.chr18:60384790C>T | Intron            | PHLPP1  |          | PH domain and leucine    | 112 (0.00) | 126 (0.18) | 0.49 |
| 12-03 | Gp3 | g.chr18:60522888T>G | Intron            | PHLPP1  |          | PH domain and leucine    | 77 (0.00)  | 67 (0.45)  | 1.19 |
| 12-03 | Gp3 | g.chr18:60525132G>T | Intron            | PHLPP1  |          | PH domain and leucine    | 44 (0.00)  | 124 (0.87) | 2.32 |

|       |     |                      |                   |         |          |                          |            |            |      |
|-------|-----|----------------------|-------------------|---------|----------|--------------------------|------------|------------|------|
| 12-03 | Gp3 | g.chr18:60561766G>A  | Intron            | PHLPP1  |          | PH domain and leucine    | 30 (0.00)  | 99 (0.84)  | 2.24 |
| 12-03 | Gp3 | g.chr18:60609120G>C  | Missense Mutation | PHLPP1  | p.A1044P | PH domain and leucine    | 59 (0.00)  | 109 (0.28) | 0.73 |
| 12-03 | Gp3 | g.chr18:60620171G>A  | Intron            | PHLPP1  |          | PH domain and leucine    | 32 (0.00)  | 15 (0.33)  | 0.89 |
| 12-03 | Gp3 | g.chr18:60644301G>A  | Intron            | PHLPP1  |          | PH domain and leucine    | 39 (0.00)  | 206 (0.43) | 1.14 |
| 12-03 | Gp3 | g.chr16:71678766C>A  | Intron            | PHLPP2  |          | PH domain and leucine    | 25 (0.00)  | 88 (0.33)  | 0.88 |
| 12-03 | Gp3 | g.chr16:71706636C>T  | Intron            | PHLPP2  |          | PH domain and leucine    | 68 (0.00)  | 57 (0.16)  | 0.42 |
| 12-03 | Gp3 | g.chr11:607871T>A    | Missense Mutation | PHRF1   | p.D804E  | PHD and ring finger do   | 42 (0.00)  | 517 (0.17) | 0.46 |
| 12-03 | Gp3 | g.chr22:21064997G>T  | Missense Mutation | PI4KA   | p.L2025M | phosphatidylinositol 4-k | 32 (0.00)  | 140 (0.11) | 0.41 |
| 12-03 | Gp3 | g.chr22:21087360C>A  | Missense Mutation | PI4KA   | p.G1396V | phosphatidylinositol 4-k | 25 (0.00)  | 137 (0.31) | 1.20 |
| 12-03 | Gp3 | g.chr15:65113701G>T  | Missense Mutation | PIF1    | p.A279D  | PIF1 5'-to-3' DNA helic  | 25 (0.00)  | 15 (0.33)  | 0.89 |
| 12-03 | Gp3 | g.chr17:26881273G>A  | Missense Mutation | PIGS    | p.R545C  | phosphatidylinositol gly | 48 (0.00)  | 32 (0.34)  | 0.92 |
| 12-03 | Gp3 | g.chr3:178917582C>T  | Missense Mutation | PIK3CA  | p.L153F  | phosphatidylinositol-4,5 | 81 (0.00)  | 22 (0.41)  | 1.09 |
| 12-03 | Gp3 | g.chr3:130403129G>A  | Missense Mutation | PIK3R4  | p.S1191L | phosphoinositide-3-kina  | 41 (0.00)  | 16 (0.31)  | 0.83 |
| 12-03 | Gp3 | g.chr3:130435326G>C  | Missense Mutation | PIK3R4  | p.Q749E  | phosphoinositide-3-kina  | 27 (0.00)  | 17 (0.59)  | 1.57 |
| 12-03 | Gp3 | g.chr2:209217467T>C  | Silent            | PIKFYVE | p.L1935L | phosphoinositide kinase  | 64 (0.00)  | 98 (0.17)  | 0.46 |
| 12-03 | Gp3 | g.chr1:24105927G>T   | Splice Site       | PITHD1  |          | PITH (C-terminal prote   | 23 (0.00)  | 36 (0.61)  | 1.63 |
| 12-03 | Gp3 | g.chr17:65548431G>T  | Missense Mutation | PITPNC1 | p.A86S   | phosphatidylinositol tra | 24 (0.00)  | 36 (0.89)  | 2.37 |
| 12-03 | Gp3 | g.chr11:67267228G>T  | Silent            | PITPNM1 | p.A379A  | phosphatidylinositol tra | 35 (0.00)  | 69 (0.48)  | 1.77 |
| 12-03 | Gp3 | g.chr22:25144934A>T  | Missense Mutation | PIWIL3  | p.N463K  | piwi-like RNA-mediate    | 37 (0.00)  | 58 (0.79)  | 2.11 |
| 12-03 | Gp3 | g.chr22:25144969A>T  | Missense Mutation | PIWIL3  | p.L452I  | piwi-like RNA-mediate    | 40 (0.00)  | 52 (0.83)  | 2.21 |
| 12-03 | Gp3 | g.chr11:94328517C>T  | Missense Mutation | PIWIL4  | p.A398V  | piwi-like RNA-mediate    | 25 (0.00)  | 114 (0.97) | 2.60 |
| 12-03 | Gp3 | g.chr8:110510941G>A  | Missense Mutation | PKHD1L1 | p.R3590Q | polycystic kidney and h  | 50 (0.00)  | 157 (0.75) | 2.00 |
| 12-03 | Gp3 | g.chr20:30785364G>A  | Missense Mutation | PLAGL2  | p.H128Y  | pleiomorphic adenoma     | 28 (0.00)  | 187 (0.18) | 0.48 |
| 12-03 | Gp3 | g.chr12:113825565C>G | Missense Mutation | PLBD2   | p.H454D  | phospholipase B domai    | 118 (0.00) | 505 (0.15) | 0.39 |
| 12-03 | Gp3 | g.chr6:151153168G>A  | Missense Mutation | PLEKHG1 | p.S974N  | pleckstrin homology do   | 86 (0.00)  | 285 (0.22) | 0.59 |
| 12-03 | Gp3 | g.chr6:151153253G>A  | Silent            | PLEKHG1 | p.E1002E | pleckstrin homology do   | 35 (0.00)  | 27 (0.19)  | 0.49 |
| 12-03 | Gp3 | g.chr19:39915368G>A  | Missense Mutation | PLEKHG2 | p.E1199K | pleckstrin homology do   | 51 (0.00)  | 242 (0.29) | 1.07 |
| 12-03 | Gp3 | g.chr19:39915434C>G  | Missense Mutation | PLEKHG2 | p.L1221V | pleckstrin homology do   | 40 (0.00)  | 271 (0.22) | 0.81 |
| 12-03 | Gp3 | g.chr16:67322069G>T  | Splice Site       | PLEKHG4 |          | pleckstrin homology do   | 36 (0.00)  | 145 (0.30) | 0.79 |
| 12-03 | Gp3 | g.chr14:68040543G>T  | Missense Mutation | PLEKHH1 | p.G622V  | pleckstrin homology do   | 16 (0.00)  | 44 (0.32)  | 0.85 |
| 12-03 | Gp3 | g.chr2:43927544A>G   | Missense Mutation | PLEKHH2 | p.R483G  | pleckstrin homology do   | 19 (0.00)  | 126 (0.40) | 1.08 |
| 12-03 | Gp3 | g.chr19:4512763C>G   | Missense Mutation | PLIN4   | p.M389I  | perilipin 4              | 39 (0.00)  | 67 (0.57)  | 2.04 |
| 12-03 | Gp3 | g.chr7:131872332C>A  | Missense Mutation | PLXNA4  | p.G964V  | plexin A4                | 38 (0.00)  | 96 (0.39)  | 1.03 |
| 12-03 | Gp3 | g.chr3:48454343G>A   | Silent            | PLXNB1  | p.L1554L | plexin B1                | 31 (0.00)  | 158 (0.15) | 0.39 |
| 12-03 | Gp3 | g.chr3:129278594G>A  | Silent            | PLXND1  | p.F1722F | plexin D1                | 25 (0.00)  | 98 (0.18)  | 0.49 |

|       |     |                      |                   |          |          |                           |            |            |            |      |
|-------|-----|----------------------|-------------------|----------|----------|---------------------------|------------|------------|------------|------|
| 12-03 | Gp3 | g.chr22:41980050G>A  | Silent            | PMM1     | p.I129I  | phosphomannomutase 1      | 17 (0.00)  | 20 (0.55)  | 1.47       |      |
| 12-03 | Gp3 | g.chr19:50369667C>T  | Missense Mutation | PNKP     | p.A63T   | polynucleotide kinase 3'  | 41 (0.00)  | 44 (0.11)  | 0.40       |      |
| 12-03 | Gp3 | g.chr6:160237044G>A  | Missense Mutation | PNLDC1   | p.A347T  | poly(A)-specific ribonucl | 126 (0.00) | 52 (0.23)  | 0.62       |      |
| 12-03 | Gp3 | g.chr6:160237612C>T  | Silent            | PNLDC1   | p.A366A  | poly(A)-specific ribonucl | 73 (0.00)  | 90 (0.30)  | 0.80       |      |
| 12-03 | Gp3 | g.chr7:131189226G>A  | Silent            | PODXL    | p.Y507Y  | podocalyxin-like          | 58 (0.00)  | 36 (0.19)  | 0.52       |      |
| 12-03 | Gp3 | g.chr7:44116147G>A   | Nonsense Mutation | POLM     | p.R266*  | polymerase (DNA direc     | 18 (0.00)  | 219 (0.18) | 0.47       |      |
| 12-03 | Gp3 | g.chr3:121187228C>T  | Missense Mutation | POLQ     | p.E2257K | polymerase (DNA direc     | 54 (0.00)  | 60 (0.50)  | 1.33       |      |
| 12-03 | Gp3 | g.chr3:121206962G>A  | Nonsense Mutation | POLQ     | p.Q1606* | polymerase (DNA direc     | 62 (0.00)  | 45 (0.20)  | 0.53       |      |
| 12-03 | Gp3 | g.chr15:21051183G>A  | Missense Mutation | POTEB2   | p.T426I  | POTE ankyrin domain f     | 23 (0.00)  | 17 (0.41)  | 1.10       |      |
| 12-03 | Gp3 | g.chr2:131414319C>A  | Silent            | POTEJ    | p.L662L  | POTE ankyrin domain f     | 135 (0.00) | 248 (0.23) | 0.94       |      |
| 12-03 | Gp3 | g.chr5:149212302G>T  | Silent            | PPARGC1B | p.S222S  | peroxisome proliferator-  | 21 (0.00)  | 189 (0.40) | 1.07       |      |
| 12-03 | Gp3 | g.chr12:81657105T>A  | Missense Mutation | PPFIA2   | p.H1207L | protein tyrosine phosph   | 26 (0.00)  | 71 (0.18)  | 0.49       |      |
| 12-03 | Gp3 | g.chr12:81657129C>A  | Missense Mutation | PPFIA2   | p.R1199M | protein tyrosine phosph   | 27 (0.00)  | 70 (0.17)  | 0.46       |      |
| 12-03 | Gp3 | g.chr1:143767495C>A  | Missense Mutation | PPIAL4G  | p.K118N  | peptidylprolyl isomer     | 115 (0.00) | 141 (0.77) | 2.04       |      |
| 12-03 | Gp3 | g.chr11:73933390G>A  | Missense Mutation | PPME1    | p.V108I  | protein phosphatase met   | 29 (0.00)  | 41 (0.15)  | 0.39       |      |
| 12-03 | Gp3 | g.chr12:111158930C>G | Missense Mutation | PPP1CC   | p.R308T  | protein phosphatase 1, c  | 34 (0.00)  | 35 (0.40)  | 1.07       |      |
| 12-03 | Gp3 | g.chr14:104206734G>T | Silent            | PPP1R13B | p.T673T  | protein phosphatase 1, r  | 43 (0.00)  | 219 (0.23) | 0.61       |      |
| 12-03 | Gp3 | g.chr19:49379064G>A  | Missense Mutation | PPP1R15A | p.R620K  | protein phosphatase 1, r  | 52 (0.00)  | 439 (0.15) | 0.55       |      |
| 12-03 | Gp3 | g.chr9:138379876C>A  | Silent            | PPP1R26  | p.R1174R | protein phosphatase 1, r  | 22 (0.00)  | 261 (0.13) | 0.43       |      |
| 12-03 | Gp3 | g.chr14:102384285G>A | Splice Site       | PPP2R5C  |          | protein phosphatase 2, r  | 31 (0.00)  | 95 (0.26)  | 0.70       |      |
| 12-03 | Gp3 | g.chr1:13036378G>T   | Missense Mutation | PRAMEF22 | p.K150N  | PRAME family member       | 139 (0.01) | 68 (0.18)  | 0.47       |      |
| 12-03 | Gp3 | g.chr1:12939704G>T   | Missense Mutation | PRAMEF4  | p.D366E  | PRAME family member       | 62 (0.00)  | 26 (0.27)  | 0.72       |      |
| 12-03 | Gp3 | g.chr1:14108692G>A   | Missense Mutation | PRDM2    | p.G1468R | PR domain containing      | 288 (0.00) | 44 (0.77)  | 2.06       |      |
| 12-03 | Gp3 | g.chr2:27355172G>T   | Silent            | PREB     | p.A284A  | prolactin regulatory ele  | 22 (0.00)  | 68 (0.28)  | 0.75       |      |
| 12-03 | Gp3 | g.chr12:57135306G>A  | Nonsense Mutation | PRIM1    | p.Q299*  | primase, DNA, polypep     | 39 (0.00)  | 107 (0.59) | 1.57       |      |
| 12-03 | Gp3 | g.chr12:57135324C>A  | Nonsense Mutation | PRIM1    | p.E293*  | primase, DNA, polypep     | 35 (0.00)  | 92 (0.52)  | 1.39       |      |
| 12-03 | Gp3 | g.chr9:71628798C>G   | Missense Mutation | PRKACG   | p.A71P   | protein kinase, cAMP-d    | 38 (0.00)  | 212 (0.17) | 0.45       |      |
| 12-03 | Gp3 | g.chr14:30132925C>T  | Missense Mutation | PRKD1    | p.A226T  | protein kinase D1         | 32 (0.00)  | 119 (0.29) | 0.76       |      |
| 12-03 | Gp3 | g.chr21:48083360T>A  | Missense Mutation | PRMT2    | p.V388E  | protein arginine methyl   | 17 (0.00)  | 90 (0.12)  | 0.46       |      |
| 12-03 | Gp3 | g.chr11:20419210G>T  | Missense Mutation | PRMT3    | p.E216D  | protein arginine methyl   | 36 (0.00)  | 11 (0.82)  | 2.18       |      |
| 12-03 | Gp3 | g.chr12:50027302C>A  | Silent            | PRPF40B  | p.T184T  | PRP40 pre-mRNA proc       | 35 (0.00)  | 97 (0.15)  | 0.41       |      |
| 12-03 | Gp3 | g.chr19:50118217G>A  | Missense Mutation | PRR12    | p.V1659M | proline rich              | 12         | 29 (0.00)  | 286 (0.24) | 0.85 |
| 12-03 | Gp3 | g.chr22:32108724T>C  | Missense Mutation | PRR14L   | p.I1701V | proline rich 14-like      | 84 (0.00)  | 18 (0.28)  | 0.74       |      |
| 12-03 | Gp3 | g.chr9:134353271A>G  | Missense Mutation | PRRC2B   | p.K822R  | proline-rich coiled-coil  | 37 (0.00)  | 102 (0.32) | 0.86       |      |
| 12-03 | Gp3 | g.chr16:29825220C>G  | Missense Mutation | PRRT2    | p.P282R  | proline-rich transmembr   | 19 (0.00)  | 150 (0.16) | 0.43       |      |

|       |     |                      |                   |         |          |                                        |            |      |
|-------|-----|----------------------|-------------------|---------|----------|----------------------------------------|------------|------|
| 12-03 | Gp3 | g.chr16:2871061G>A   | Missense Mutation | PRSS21  | p.G219E  | protease, serine, 21 (test 17 (0.00)   | 225 (0.15) | 0.49 |
| 12-03 | Gp3 | g.chr1:151006411C>A  | Missense Mutation | PRUNE   | p.L355I  | prune exopolyphosphata 19 (0.00)       | 27 (0.37)  | 1.23 |
| 12-03 | Gp3 | g.chr10:73588712C>A  | Missense Mutation | PSAP    | p.E166D  | prosaposin 19 (0.00)                   | 16 (0.94)  | 2.50 |
| 12-03 | Gp3 | g.chr19:43530491G>A  | Missense Mutation | PSG11   | p.H12Y   | pregnancy specific beta-60 (0.00)      | 79 (0.72)  | 1.92 |
| 12-03 | Gp3 | g.chr17:4700783G>A   | Missense Mutation | PSMB6   | p.R74H   | proteasome (prosome, n 74 (0.00)       | 23 (0.83)  | 2.20 |
| 12-03 | Gp3 | g.chr3:64004695T>C   | Silent            | PSMD6   | p.G172G  | proteasome (prosome, n 63 (0.00)       | 27 (0.19)  | 0.49 |
| 12-03 | Gp3 | g.chr10:89648131C>T  | Intron            | PTEN    |          | phosphatase and tensin 129 (0.00)      | 56 (0.43)  | 1.14 |
| 12-03 | Gp3 | g.chr10:89695737G>A  | Intron            | PTEN    |          | phosphatase and tensin 1108 (0.00)     | 61 (0.72)  | 1.92 |
| 12-03 | Gp3 | g.chr10:89700707C>A  | Intron            | PTEN    |          | phosphatase and tensin 161 (0.00)      | 17 (0.41)  | 1.10 |
| 12-03 | Gp3 | g.chr10:89722752C>T  | Intron            | PTEN    |          | phosphatase and tensin 192 (0.00)      | 46 (0.20)  | 0.52 |
| 12-03 | Gp3 | g.chr5:40681479C>G   | Missense Mutation | PTGER4  | p.S128R  | prostaglandin E receptor 141 (0.00)    | 497 (0.16) | 0.42 |
| 12-03 | Gp3 | g.chr1:117529476A>G  | Missense Mutation | PTGFRN  | p.I843V  | prostaglandin F2 receptor 35 (0.00)    | 73 (0.18)  | 0.47 |
| 12-03 | Gp3 | g.chr9:96847022G>A   | Silent            | PTPDC1  | p.E70E   | protein tyrosine phosphatase 79 (0.00) | 203 (0.14) | 0.38 |
| 12-03 | Gp3 | g.chr9:96857666G>A   | Silent            | PTPDC1  | p.V226V  | protein tyrosine phosphatase 49 (0.00) | 78 (0.38)  | 1.03 |
| 12-03 | Gp3 | g.chr7:77195520G>A   | Intron            | PTPN12  |          | protein tyrosine phosphatase 20 (0.00) | 24 (0.67)  | 1.78 |
| 12-03 | Gp3 | g.chr7:77218232C>A   | Intron            | PTPN12  |          | protein tyrosine phosphatase 57 (0.02) | 107 (0.54) | 1.45 |
| 12-03 | Gp3 | g.chr7:77226350C>A   | Intron            | PTPN12  |          | protein tyrosine phosphatase 35 (0.00) | 30 (0.47)  | 1.24 |
| 12-03 | Gp3 | g.chr3:47453028G>A   | Missense Mutation | PTPN23  | p.S1247N | protein tyrosine phosphatase 29 (0.00) | 257 (0.18) | 0.47 |
| 12-03 | Gp3 | g.chr9:112216810G>A  | Missense Mutation | PTPN3   | p.P112S  | protein tyrosine phosphatase 60 (0.00) | 33 (0.88)  | 2.34 |
| 12-03 | Gp3 | g.chr1:44085824T>A   | Missense Mutation | PTPRF   | p.W1715R | protein tyrosine phosphatase 26 (0.00) | 29 (0.21)  | 0.55 |
| 12-03 | Gp3 | g.chr19:55718140C>T  | Missense Mutation | PTPRH   | p.G90E   | protein tyrosine phosphatase 56 (0.00) | 134 (0.21) | 0.56 |
| 12-03 | Gp3 | g.chr19:5219985G>T   | Missense Mutation | PTPRS   | p.L1244I | protein tyrosine phosphatase 36 (0.00) | 342 (0.26) | 0.94 |
| 12-03 | Gp3 | g.chr2:20490431G>T   | Missense Mutation | PUM2    | p.L425I  | pumilio RNA-binding factor 33 (0.00)   | 10 (0.80)  | 2.13 |
| 12-03 | Gp3 | g.chr11:125765837C>T | Missense Mutation | PUS3    | p.G115R  | pseudouridylate synthase 85 (0.00)     | 89 (0.15)  | 0.39 |
| 12-03 | Gp3 | g.chr19:45162096G>A  | Missense Mutation | PVR     | p.G360R  | poliovirus receptor 16 (0.00)          | 18 (0.78)  | 2.07 |
| 12-03 | Gp3 | g.chr19:45162159T>C  | Missense Mutation | PVR     | p.C381R  | poliovirus receptor 16 (0.00)          | 23 (0.30)  | 0.81 |
| 12-03 | Gp3 | g.chr1:226109270G>A  | Silent            | PYCR2   | p.L205L  | pyrroline-5-carboxylate 22 (0.00)      | 181 (0.17) | 0.44 |
| 12-03 | Gp3 | g.chr1:154932271C>A  | Missense Mutation | PYGO2   | p.V69L   | pygopus family PHD finger 19 (0.00)    | 72 (0.18)  | 0.38 |
| 12-03 | Gp3 | g.chr17:74283947T>A  | Missense Mutation | QRICH2  | p.E1111V | glutamine rich 2 33 (0.03)             | 23 (0.22)  | 0.58 |
| 12-03 | Gp3 | g.chr2:136396529G>T  | Missense Mutation | R3HDM1  | p.L296F  | R3H domain containing 55 (0.00)        | 19 (0.79)  | 1.20 |
| 12-03 | Gp3 | g.chr3:128813861T>A  | Missense Mutation | RAB43   | p.Y119F  | RAB43, member RAS c 31 (0.00)          | 80 (0.40)  | 1.07 |
| 12-03 | Gp3 | g.chr15:40993312C>T  | Silent            | RAD51   | p.F46F   | RAD51 recombinase 35 (0.00)            | 32 (0.19)  | 0.50 |
| 12-03 | Gp3 | g.chr5:34823315G>A   | Silent            | RAI14   | p.Q456Q  | retinoic acid induced 14 24 (0.00)     | 57 (0.35)  | 0.94 |
| 12-03 | Gp3 | g.chr9:6015529T>A    | Missense Mutation | RANBP6  | p.I27F   | RAN binding protein 6 17 (0.00)        | 139 (0.29) | 0.79 |
| 12-03 | Gp3 | g.chr9:134526309A>T  | Missense Mutation | RAPGEF1 | p.F30Y   | Rap guanine nucleotide 18 (0.00)       | 12 (0.67)  | 1.78 |

|       |     |                      |                   |               |          |                                     |            |            |      |
|-------|-----|----------------------|-------------------|---------------|----------|-------------------------------------|------------|------------|------|
| 12-03 | Gp3 | g.chr6:88240535G>A   | Silent            | RARS2         | p.D246D  | arginyl-tRNA synthetase 41 (0.00)   | 223 (0.64) | 0.91       |      |
| 12-03 | Gp3 | g.chr5:179548150C>A  | Splice Site       | RASGEF1C      |          | RasGEF domain family, 15 (0.00)     | 15 (0.67)  | 2.14       |      |
| 12-03 | Gp3 | g.chr13:48890459C>A  | Intron            | RB1           |          | retinoblastoma 1 25 (0.00)          | 170 (0.16) | 0.44       |      |
| 12-03 | Gp3 | g.chr13:48890593G>T  | Intron            | RB1           |          | retinoblastoma 1 17 (0.00)          | 20 (0.45)  | 1.20       |      |
| 12-03 | Gp3 | g.chr13:48902905C>T  | Intron            | RB1           |          | retinoblastoma 1 56 (0.00)          | 16 (0.44)  | 1.17       |      |
| 12-03 | Gp3 | g.chr20:34241613G>C  | Silent            | RBM12         | p.V544V  | RNA binding motif prot 134 (0.00)   | 102 (0.98) | 2.61       |      |
| 12-03 | Gp3 | g.chr8:94745914C>T   | Missense Mutation | RBM12B        | p.G909R  | RNA binding motif prot 68 (0.00)    | 240 (0.16) | 0.43       |      |
| 12-03 | Gp3 | g.chr10:6155489A>T   | Missense Mutation | RBM17         | p.D292V  | RNA binding motif prot 22 (0.00)    | 38 (0.21)  | 0.56       |      |
| 12-03 | Gp3 | g.chr19:36120463C>T  | Missense Mutation | RBM42         | p.P57L   | RNA binding motif prot 33 (0.00)    | 53 (0.42)  | 1.11       |      |
| 12-03 | Gp3 | g.chr19:50040307G>A  | Missense Mutation | RCN3          | p.V155M  | reticulocalbin 3, EF-han 46 (0.02)  | 368 (0.26) | 0.92       |      |
| 12-03 | Gp3 | g.chr12:57346727C>T  | Missense Mutation | RDH16         | p.G207D  | retinol dehydrogenase 1 51 (0.00)   | 40 (0.85)  | 2.27       |      |
| 12-03 | Gp3 | g.chr17:73661160C>A  | Missense Mutation | RECQL5        | p.V75L   | RecQ protein-like 5 64 (0.00)       | 62 (0.53)  | 1.42       |      |
| 12-03 | Gp3 | g.chrX:71350203C>T   | Silent            | RGAG4         | p.E396E  | retrotransposon gag don 25 (0.00)   | 70 (0.53)  | 0.88       |      |
| 12-03 | Gp3 | g.chr2:107040815T>C  | Missense Mutation | RGPD3         | p.K1203R | RANBP2-like and GRIIF 117 (0.01)    | 63 (0.29)  | 0.76       |      |
| 12-03 | Gp3 | g.chr2:108489230G>A  | Silent            | RGPD4         | p.Q1590Q | RANBP2-like and GRIIF 53 (0.00)     | 62 (0.53)  | 1.42       |      |
| 12-03 | Gp3 | g.chr4:3430435G>A    | Missense Mutation | RGS12         | p.E1188K | regulator of G-protein si27 (0.00)  | 85 (0.40)  | 1.07       |      |
| 12-03 | Gp3 | g.chr12:2997475T>C   | Silent            | RHNO1         | p.P175P  | RAD9-HUS1-RAD1 int 25 (0.00)        | 20 (0.50)  | 1.33       |      |
| 12-03 | Gp3 | g.chr20:19955473C>T  | Silent            | RIN2          | p.A317A  | Ras and Rab interactor 235 (0.03)   | 167 (0.29) | 0.78       |      |
| 12-03 | Gp3 | g.chr17:41180496C>A  | Nonsense Mutation | RND2          | p.C161*  | Rho family GTPase 2 18 (0.00)       | 89 (0.22)  | 0.42       |      |
| 12-03 | Gp3 | g.chr1:20141544G>C   | Silent            | RNF186        | p.A17A   | ring finger protein 186 15 (0.00)   | 250 (0.22) | 0.59       |      |
| 12-03 | Gp3 | g.chr12:121861260G>C | Missense Mutation | RNF34         | p.D334H  | ring finger protein 34, E 20 (0.00) | 38 (0.24)  | 0.63       |      |
| 12-03 | Gp3 | g.chr1:201958113G>T  | Missense Mutation | RNPEP         | p.A177S  | arginyl aminopeptidase 74 (0.00)    | 60 (0.78)  | 2.09       |      |
| 12-03 | Gp3 | g.chr18:110299G>T    | RNA               | ROCK1P1       |          | Rho-associated, coiled-c 48 (0.02)  | 30 (0.17)  | 0.44       |      |
| 12-03 | Gp3 | g.chr18:110501C>T    | RNA               | ROCK1P1       |          | Rho-associated, coiled-c 25 (0.00)  | 18 (0.28)  | 0.74       |      |
| 12-03 | Gp3 | g.chr18:110527T>C    | RNA               | ROCK1P1       |          | Rho-associated, coiled-c 21 (0.00)  | 16 (0.31)  | 0.83       |      |
| 12-03 | Gp3 | g.chrX:114953381G>T  | Missense Mutation | RP1-241P17.4  | p.Q57K   |                                     | 31 (0.00)  | 14 (0.50)  | 0.83 |
| 12-03 | Gp3 | g.chr22:44761504G>T  | Nonsense Mutation | RP1-32I10.10  | p.G4*    |                                     | 19 (0.00)  | 20 (0.95)  | 2.53 |
| 12-03 | Gp3 | g.chr5:177059252G>A  | RNA               | RP11-1277A3.2 |          |                                     | 19 (0.00)  | 19 (0.42)  | 1.35 |
| 12-03 | Gp3 | g.chr4:9386263G>A    | Silent            | RP11-1396O1.1 | p.H127H  |                                     | 50 (0.00)  | 20 (0.45)  | 1.20 |
| 12-03 | Gp3 | g.chr16:74382953A>C  | RNA               | RP11-252A24.2 |          |                                     | 30 (0.00)  | 73 (0.71)  | 1.90 |
| 12-03 | Gp3 | g.chr4:40045277T>C   | RNA               | RP11-333E13.4 |          |                                     | 15 (0.00)  | 148 (0.23) | 0.61 |
| 12-03 | Gp3 | g.chr1:142810463A>T  | lincRNA           | RP11-423O2.5  |          |                                     | 19 (0.00)  | 42 (0.67)  | 1.78 |
| 12-03 | Gp3 | g.chr1:142810475C>T  | lincRNA           | RP11-423O2.5  |          |                                     | 19 (0.00)  | 38 (0.66)  | 1.75 |
| 12-03 | Gp3 | g.chr3:185689679G>T  | RNA               | RP11-443P15.2 |          |                                     | 33 (0.00)  | 29 (0.72)  | 1.93 |
| 12-03 | Gp3 | g.chr3:196043067G>T  | Missense Mutation | RP11-447L10.1 | p.A50D   |                                     | 15 (0.00)  | 31 (0.26)  | 0.69 |

|       |     |                      |                   |                      |          |                                      |            |            |      |
|-------|-----|----------------------|-------------------|----------------------|----------|--------------------------------------|------------|------------|------|
| 12-03 | Gp3 | g.chr1:145281510G>A  | Missense Mutation | RP11-458D21. p.C147Y |          | 115 (0.00)                           | 122 (0.39) | 1.03       |      |
| 12-03 | Gp3 | g.chr1:202794939G>A  | Missense Mutation | RP11-480I12.4p.C102Y |          | 36 (0.00)                            | 57 (0.61)  | 1.33       |      |
| 12-03 | Gp3 | g.chr9:95647313C>A   | RNA               | RP11-526D8.7         |          | 66 (0.00)                            | 238 (0.53) | 1.40       |      |
| 12-03 | Gp3 | g.chr9:95647769A>G   | RNA               | RP11-526D8.7         |          | 67 (0.00)                            | 71 (0.30)  | 0.79       |      |
| 12-03 | Gp3 | g.chr9:95648403G>A   | RNA               | RP11-526D8.7         |          | 22 (0.00)                            | 12 (0.58)  | 1.56       |      |
| 12-03 | Gp3 | g.chr5:162843571C>A  | RNA               | RP11-541P9.3         |          | 21 (0.00)                            | 31 (0.29)  | 0.77       |      |
| 12-03 | Gp3 | g.chr18:48445G>A     | Nonsense Mutation | RP11-683L23. p.Q60*  |          | 59 (0.00)                            | 201 (0.23) | 0.62       |      |
| 12-03 | Gp3 | g.chr15:67293200G>A  | lincRNA           | RP11-798K3.2         |          | 31 (0.00)                            | 51 (0.20)  | 0.52       |      |
| 12-03 | Gp3 | g.chr1:143743198G>A  | lincRNA           | RP6-206117.1         |          | 18 (0.00)                            | 38 (0.32)  | 0.84       |      |
| 12-03 | Gp3 | g.chr14:21788274C>T  | Missense Mutation | RPGRIP1              | p.P469S  | retinitis pigmentosa GTI42 (0.00)    | 287 (0.29) | 0.61       |      |
| 12-03 | Gp3 | g.chr1:24019171G>A   | Missense Mutation | RPL11                | p.G27R   | ribosomal protein L11                | 22 (0.00)  | 35 (0.91)  | 2.44 |
| 12-03 | Gp3 | g.chr10:15145642G>A  | Missense Mutation | RPP38                | p.R110K  | ribonuclease P/MRP 38I25 (0.00)      | 20 (0.70)  | 1.87       |      |
| 12-03 | Gp3 | g.chr6:166914393C>T  | Missense Mutation | RPS6KA2              | p.G107R  | ribosomal protein S6 kir 55 (0.00)   | 212 (0.20) | 0.53       |      |
| 12-03 | Gp3 | g.chr15:41770811C>T  | Silent            | RTF1                 | p.T602T  | Rtf1, Paf1/RNA polyme 121 (0.01)     | 71 (0.68)  | 1.80       |      |
| 12-03 | Gp3 | g.chr14:101348835G>T | Missense Mutation | RTL1                 | p.S764Y  | retrotransposon-like 1               | 39 (0.00)  | 37 (0.19)  | 0.50 |
| 12-03 | Gp3 | g.chr3:72434321C>G   | Intron            | RYBP                 |          | RING1 and YY1 bindin 108 (0.00)      | 26 (0.54)  | 1.44       |      |
| 12-03 | Gp3 | g.chr3:72443909C>A   | Intron            | RYBP                 |          | RING1 and YY1 bindin 51 (0.00)       | 50 (0.26)  | 0.69       |      |
| 12-03 | Gp3 | g.chr3:72464017G>A   | Intron            | RYBP                 |          | RING1 and YY1 bindin 43 (0.00)       | 31 (0.23)  | 0.60       |      |
| 12-03 | Gp3 | g.chr3:72489962G>A   | Intron            | RYBP                 |          | RING1 and YY1 bindin 58 (0.00)       | 31 (0.81)  | 2.15       |      |
| 12-03 | Gp3 | g.chr19:39051920G>T  | Silent            | RYR1                 | p.S4150S | ryanodine receptor 1 (sk 37 (0.00)   | 352 (0.14) | 0.39       |      |
| 12-03 | Gp3 | g.chr1:237664166C>T  | Missense Mutation | RYR2                 | p.L787F  | ryanodine receptor 2 (ca 19 (0.00)   | 65 (0.38)  | 1.03       |      |
| 12-03 | Gp3 | g.chr13:23904372G>C  | Missense Mutation | SACS                 | p.P4548R | sacsin molecular chaper 77 (0.00)    | 153 (0.66) | 1.76       |      |
| 12-03 | Gp3 | g.chr20:50408682C>T  | Missense Mutation | SALL4                | p.D114N  | spalt-like transcription f 41 (0.00) | 342 (0.29) | 0.77       |      |
| 12-03 | Gp3 | g.chr7:92763751G>T   | Missense Mutation | SAMD9L               | p.L512I  | sterile alpha motif doma 40 (0.00)   | 33 (0.45)  | 1.21       |      |
| 12-03 | Gp3 | g.chr1:100550901G>T  | Missense Mutation | SASS6                | p.Q653K  | spindle assembly 6 hom 93 (0.00)     | 52 (0.23)  | 0.62       |      |
| 12-03 | Gp3 | g.chr15:32972104G>A  | Missense Mutation | SCG5                 | p.V122I  | secretogranin V (7B2 pr 43 (0.00)    | 162 (0.36) | 1.20       |      |
| 12-03 | Gp3 | g.chr5:147261104C>A  | Missense Mutation | SCGB3A2              | p.L51I   | secretoglobin, family 3A 66 (0.00)   | 22 (0.27)  | 0.73       |      |
| 12-03 | Gp3 | g.chr17:5126670C>A   | Missense Mutation | SCIMP                | p.G35C   | SLP adaptor and CSK ir 67 (0.00)     | 23 (0.35)  | 0.75       |      |
| 12-03 | Gp3 | g.chr2:238999877G>T  | Missense Mutation | SCLY                 | p.M309I  | selenocysteine lyase                 | 52 (0.00)  | 101 (0.15) | 0.40 |
| 12-03 | Gp3 | g.chr2:166901664C>T  | Silent            | SCN1A                | p.E517E  | sodium channel, voltage 107 (0.00)   | 85 (0.89)  | 2.38       |      |
| 12-03 | Gp3 | g.chr2:166904278G>A  | Splice Site       | SCN1A                | p.G343G  | sodium channel, voltage 30 (0.00)    | 21 (0.48)  | 1.27       |      |
| 12-03 | Gp3 | g.chr17:62020457C>A  | Splice Site       | SCN4A                |          | sodium channel, voltage 17 (0.00)    | 37 (0.22)  | 0.58       |      |
| 12-03 | Gp3 | g.chr16:23197820C>T  | Silent            | SCNN1G               | p.F76F   | sodium channel, non-vo 34 (0.00)     | 302 (0.21) | 0.55       |      |
| 12-03 | Gp3 | g.chr16:23197897T>A  | Missense Mutation | SCNN1G               | p.I102N  | sodium channel, non-vo 25 (0.00)     | 112 (0.44) | 1.17       |      |
| 12-03 | Gp3 | g.chr22:50962107C>G  | Missense Mutation | SCO2                 | p.R245T  | SCO2 cytochrome c oxi 38 (0.00)      | 104 (0.22) | 0.84       |      |

|       |     |                     |                   |           |          |                                      |            |      |
|-------|-----|---------------------|-------------------|-----------|----------|--------------------------------------|------------|------|
| 12-03 | Gp3 | g.chr11:9069533G>A  | Silent            | SCUBE2    | p.I584I  | signal peptide, CUB dor 67 (0.01)    | 89 (0.24)  | 0.47 |
| 12-03 | Gp3 | g.chr11:65303577C>G | Missense Mutation | SCYL1     | p.L514V  | SCY1-like 1 (S. cerevisi)23 (0.00)   | 91 (0.42)  | 1.55 |
| 12-03 | Gp3 | g.chr5:134059326C>T | Nonsense Mutation | SEC24A    | p.Q1045* | SEC24 family member 25 (0.00)        | 26 (0.35)  | 0.92 |
| 12-03 | Gp3 | g.chr4:83763348A>G  | Silent            | SEC31A    | p.P971P  | SEC31 homolog A (S. c 16 (0.00)      | 16 (0.88)  | 2.33 |
| 12-03 | Gp3 | g.chr1:169676499C>A | Silent            | SELL      | p.G201G  | selectin L 49 (0.00)                 | 46 (0.65)  | 1.74 |
| 12-03 | Gp3 | g.chr22:31501643C>T | Splice Site       | SELM      |          | 39 (0.00)                            | 76 (0.46)  | 1.23 |
| 12-03 | Gp3 | g.chr2:74902904A>T  | Missense Mutation | SEMA4F    | p.E504V  | sema domain, immunog 73 (0.00)       | 53 (0.21)  | 0.55 |
| 12-03 | Gp3 | g.chr2:74906743G>T  | Nonsense Mutation | SEMA4F    | p.E574*  | sema domain, immunog 69 (0.00)       | 319 (0.15) | 0.39 |
| 12-03 | Gp3 | g.chr16:4835815C>T  | Missense Mutation | SEPT12    | p.D123N  | septin 12 43 (0.00)                  | 369 (0.27) | 0.90 |
| 12-03 | Gp3 | g.chr20:43132544G>A | Missense Mutation | SERINC3   | p.P323S  | serine incorporator 3 41 (0.00)      | 53 (0.49)  | 1.31 |
| 12-03 | Gp3 | g.chr14:94914981G>A | Missense Mutation | SERPINA11 | p.A44V   | serpin peptidase inhibito 96 (0.01)  | 248 (0.60) | 1.61 |
| 12-03 | Gp3 | g.chr22:21141334G>A | Missense Mutation | SERPIND1  | p.A494T  | serpin peptidase inhibito 18 (0.00)  | 12 (0.92)  | 3.50 |
| 12-03 | Gp3 | g.chr16:30976227A>G | Silent            | SETD1A    | p.T388T  | SET domain containing 54 (0.00)      | 392 (0.15) | 0.52 |
| 12-03 | Gp3 | g.chr14:99879350C>A | Missense Mutation | SETD3     | p.G263C  | SET domain containing 19 (0.00)      | 100 (0.98) | 2.61 |
| 12-03 | Gp3 | g.chr9:135139653G>A | Silent            | SETX      | p.S2669S | senataxin 95 (0.00)                  | 244 (0.21) | 0.57 |
| 12-03 | Gp3 | g.chr9:135204715T>C | Missense Mutation | SETX      | p.K757R  | senataxin 71 (0.00)                  | 60 (0.20)  | 0.53 |
| 12-03 | Gp3 | g.chr1:149898653C>A | Silent            | SF3B4     | p.L107L  | splicing factor 3b, subu 85 (0.00)   | 65 (0.62)  | 2.04 |
| 12-03 | Gp3 | g.chr10:81372071C>T | Missense Mutation | SFTPA1    | p.P74L   | surfactant protein A1 67 (0.00)      | 178 (0.19) | 0.49 |
| 12-03 | Gp3 | g.chr10:81372122C>T | Missense Mutation | SFTPA1    | p.P91L   | surfactant protein A1 32 (0.00)      | 149 (0.17) | 0.45 |
| 12-03 | Gp3 | g.chr3:72862295G>A  | Intron            | SHQ1      |          | SHQ1, H/ACA ribonucl 23 (0.00)       | 33 (0.91)  | 2.42 |
| 12-03 | Gp3 | g.chr3:72864323A>G  | Intron            | SHQ1      |          | SHQ1, H/ACA ribonucl 53 (0.00)       | 84 (0.24)  | 0.63 |
| 12-03 | Gp3 | g.chr3:72880779C>T  | Intron            | SHQ1      |          | SHQ1, H/ACA ribonucl 125 (0.00)      | 87 (0.36)  | 0.95 |
| 12-03 | Gp3 | g.chr3:72886353G>A  | Intron            | SHQ1      |          | SHQ1, H/ACA ribonucl 18 (0.00)       | 44 (0.93)  | 2.48 |
| 12-03 | Gp3 | g.chr3:113329868G>A | Missense Mutation | SIDT1     | p.M578I  | SID1 transmembrane fa 19 (0.00)      | 56 (0.91)  | 2.43 |
| 12-03 | Gp3 | g.chr9:34635815C>A  | Silent            | SIGMAR1   | p.V162V  | sigma non-opioid intrac 35 (0.00)    | 148 (0.18) | 0.47 |
| 12-03 | Gp3 | g.chr10:21804823T>C | Silent            | SKIDA1    | p.E643E  | SKI/DACH domain con 49 (0.00)        | 17 (0.47)  | 1.25 |
| 12-03 | Gp3 | g.chr1:160466130C>A | Missense Mutation | SLAMF6    | p.G35W   | SLAM family member 32 (0.00)         | 106 (0.78) | 1.65 |
| 12-03 | Gp3 | g.chr4:48490471C>A  | Missense Mutation | SLC10A4   | p.L277M  | solute carrier family 10, 36 (0.00)  | 26 (0.73)  | 1.95 |
| 12-03 | Gp3 | g.chr11:60714088G>A | Missense Mutation | SLC15A3   | p.P255L  | solute carrier family 15 59 (0.00)   | 125 (0.21) | 0.42 |
| 12-03 | Gp3 | g.chr10:61413929C>T | Silent            | SLC16A9   | p.R285R  | solute carrier family 16, 28 (0.00)  | 50 (0.20)  | 0.53 |
| 12-03 | Gp3 | g.chr8:42297033G>T  | Missense Mutation | SLC20A2   | p.A290E  | solute carrier family 20 20 (0.00)   | 23 (0.30)  | 0.81 |
| 12-03 | Gp3 | g.chr7:107415284G>A | Missense Mutation | SLC26A3   | p.R571C  | solute carrier family 26 78 (0.00)   | 79 (0.54)  | 1.45 |
| 12-03 | Gp3 | g.chr19:59012760C>A | Missense Mutation | SLC27A5   | p.A359S  | solute carrier family 27 26 (0.00)   | 50 (0.36)  | 0.96 |
| 12-03 | Gp3 | g.chr1:9098033G>C   | Missense Mutation | SLC2A5    | p.P409A  | solute carrier family 2 (f 16 (0.00) | 62 (0.23)  | 0.60 |
| 12-03 | Gp3 | g.chr12:46764389C>T | Missense Mutation | SLC38A2   | p.G74R   | solute carrier family 38, 29 (0.00)  | 77 (0.17)  | 0.45 |



|       |     |                     |                   |          |          |                                     |            |      |
|-------|-----|---------------------|-------------------|----------|----------|-------------------------------------|------------|------|
| 12-03 | Gp3 | g.chr1:153933100C>A | Missense Mutation | SLC39A1  | p.G150V  | solute carrier family 39_40 (0.00)  | 166 (0.48) | 1.00 |
| 12-03 | Gp3 | g.chr17:70943930C>T | Missense Mutation | SLC39A11 | p.A131T  | solute carrier family 39_31 (0.00)  | 18 (0.50)  | 1.33 |
| 12-03 | Gp3 | g.chr19:10745708G>A | Silent            | SLC44A2  | p.K338K  | solute carrier family 44_83 (0.00)  | 15 (0.93)  | 3.27 |
| 12-03 | Gp3 | g.chr19:10746155C>A | Missense Mutation | SLC44A2  | p.S399R  | solute carrier family 44_22 (0.00)  | 50 (0.14)  | 0.49 |
| 12-03 | Gp3 | g.chr2:162735756C>T | Missense Mutation | SLC4A10  | p.A355V  | solute carrier family 4_s32 (0.00)  | 34 (0.18)  | 0.47 |
| 12-03 | Gp3 | g.chr2:162815024G>T | Missense Mutation | SLC4A10  | p.V941L  | solute carrier family 4_s56 (0.00)  | 27 (0.33)  | 0.89 |
| 12-03 | Gp3 | g.chr11:26734241G>T | Silent            | SLC5A12  | p.R118R  | solute carrier family 5 (s93 (0.00) | 40 (0.40)  | 1.07 |
| 12-03 | Gp3 | g.chr1:44474270C>G  | Silent            | SLC6A9   | p.V50V   | solute carrier family 6 (t19 (0.00) | 18 (0.44)  | 1.19 |
| 12-03 | Gp3 | g.chr1:27428982G>A  | Nonsense Mutation | SLC9A1   | p.Q572*  | solute carrier family 9_s18 (0.00)  | 414 (0.27) | 0.71 |
| 12-03 | Gp3 | g.chr18:48567417C>A | Intron            | SMAD4    |          | SMAD family member_57 (0.00)        | 83 (0.88)  | 2.35 |
| 12-03 | Gp3 | g.chr19:11100023G>A | Silent            | SMARCA4  | p.Q383Q  | SWI/SNF related, matri:19 (0.00)    | 186 (0.28) | 0.98 |
| 12-03 | Gp3 | g.chr22:24145499C>T | Missense Mutation | SMARCB1  | p.P127L  | SWI/SNF related, matri:76 (0.00)    | 156 (0.62) | 1.66 |
| 12-03 | Gp3 | g.chr12:50481239C>T | Missense Mutation | SMARCD1  | p.L209F  | SWI/SNF related, matri:57 (0.00)    | 81 (0.31)  | 0.82 |
| 12-03 | Gp3 | g.chr17:61911866T>C | Missense Mutation | SMARCD2  | p.K297E  | SWI/SNF related, matri:34 (0.00)    | 115 (0.50) | 1.32 |
| 12-03 | Gp3 | g.chr22:45748455C>T | Missense Mutation | SMC1B    | p.E1101K | structural maintenance c19 (0.00)   | 75 (0.92)  | 2.45 |
| 12-03 | Gp3 | g.chr17:18219115C>A | Silent            | SMCR8    | p.A4A    | Smith-Magenis syndrom67 (0.01)      | 162 (0.40) | 1.07 |
| 12-03 | Gp3 | g.chr17:57288171C>T | Silent            | SMG8     | p.D253D  | SMG8 nonsense mediator17 (0.00)     | 34 (0.15)  | 0.39 |
| 12-03 | Gp3 | g.chr16:12662374C>T | Missense Mutation | SNX29    | p.P777L  | sorting nexin 29_68 (0.00)          | 222 (0.26) | 0.54 |
| 12-03 | Gp3 | g.chr16:29342511C>T | lincRNA           | SNX29P2  |          | sorting nexin 29 pseudo_32 (0.00)   | 45 (0.47)  | 1.24 |
| 12-03 | Gp3 | g.chr8:22421558G>A  | Missense Mutation | SORBS3   | p.A215T  | sorbin and SH3 domain 43 (0.00)     | 40 (0.35)  | 0.93 |
| 12-03 | Gp3 | g.chr11:16208371T>A | Missense Mutation | SOX6     | p.K222N  | SRY (sex determining r91 (0.00)     | 68 (0.21)  | 0.55 |
| 12-03 | Gp3 | g.chr17:26912597G>T | Silent            | SPAG5    | p.S605S  | sperm associated antigen27 (0.00)   | 11 (0.82)  | 2.18 |
| 12-03 | Gp3 | g.chr5:169021187A>G | Silent            | SPDL1    | p.R190R  | spindle apparatus coiled39 (0.00)   | 23 (0.26)  | 0.70 |
| 12-03 | Gp3 | g.chr20:3761827T>C  | Splice Site       | SPEF1    | p.G36G   | sperm flagellar 1_39 (0.00)         | 156 (0.17) | 0.46 |
| 12-03 | Gp3 | g.chr1:16257957C>T  | Missense Mutation | SPEN     | p.S1741L | spen family transcription233 (0.00) | 414 (0.66) | 1.75 |
| 12-03 | Gp3 | g.chr18:12506635T>A | Silent            | SPIRE1   | p.R271R  | spire-type actin nucleati38 (0.00)  | 56 (0.98)  | 2.62 |
| 12-03 | Gp3 | g.chr1:32280421T>C  | Missense Mutation | SPOCD1   | p.M172V  | SPOC domain containin22 (0.00)      | 138 (0.16) | 0.43 |
| 12-03 | Gp3 | g.chr17:47679363G>A | Silent            | SPOP     | p.L282L  | speckle-type POZ protei100 (0.00)   | 40 (0.20)  | 0.53 |
| 12-03 | Gp3 | g.chr19:2351471C>T  | RNA               | SPPL2B   |          | signal peptide peptidase 39 (0.00)  | 469 (0.19) | 0.70 |
| 12-03 | Gp3 | g.chr19:41008192C>T | Missense Mutation | SPTBN4   | p.T352M  | spectrin, beta, non-eryth25 (0.00)  | 192 (0.22) | 0.83 |
| 12-03 | Gp3 | g.chr17:2218918T>A  | Missense Mutation | SRR      | p.S22T   | serine racemase_32 (0.00)           | 14 (0.50)  | 1.33 |
| 12-03 | Gp3 | g.chr17:2221228C>T  | Missense Mutation | SRR      | p.A78V   | serine racemase_56 (0.00)           | 76 (0.26)  | 0.70 |
| 12-03 | Gp3 | g.chr20:60749702C>A | Splice Site       | SS18L1   |          | synovial sarcoma transloc65 (0.00)  | 422 (0.29) | 0.78 |
| 12-03 | Gp3 | g.chr7:149481207A>G | RNA               | SSPO     |          | SCO-spondin_19 (0.00)               | 165 (0.16) | 0.42 |
| 12-03 | Gp3 | g.chr7:149485105G>A | RNA               | SSPO     |          | SCO-spondin_16 (0.00)               | 71 (0.24)  | 0.64 |

|       |     |                      |                   |         |          |                                                              |            |      |
|-------|-----|----------------------|-------------------|---------|----------|--------------------------------------------------------------|------------|------|
| 12-03 | Gp3 | g.chr11:8736234G>A   | Missense Mutation | ST5     | p.S135F  | suppression of tumorigenesis 44 (0.00)                       | 17 (0.47)  | 0.93 |
| 12-03 | Gp3 | g.chr18:55020109G>A  | Missense Mutation | ST8SIA3 | p.S11N   | ST8 alpha-N-acetyl-neuraminidase 19 (0.00)                   | 58 (0.26)  | 0.69 |
| 12-03 | Gp3 | g.chr15:42981838G>A  | Missense Mutation | STARD9  | p.A2688T | StAR-related lipid transfer protein 21 (0.00)                | 14 (0.79)  | 2.10 |
| 12-03 | Gp3 | g.chr2:191926534C>A  | Nonsense Mutation | STAT4   | p.E319*  | signal transducer and activator of transcription 4 37 (0.00) | 128 (0.15) | 0.40 |
| 12-03 | Gp3 | g.chr4:27019575G>C   | Missense Mutation | STIM2   | p.E578Q  | stromal interaction molecule 2 72 (0.00)                     | 46 (0.63)  | 1.68 |
| 12-03 | Gp3 | g.chr11:63967417G>A  | Silent            | STIP1   | p.E390E  | stress-induced phosphoprotein 52 (0.00)                      | 124 (0.15) | 0.39 |
| 12-03 | Gp3 | g.chr5:146752735C>A  | Missense Mutation | STK32A  | p.L261I  | serine/threonine kinase 16 (0.00)                            | 11 (0.82)  | 2.18 |
| 12-03 | Gp3 | g.chr4:184930504C>T  | Silent            | STOX2   | p.T171T  | storkhead box 2 22 (0.00)                                    | 41 (0.83)  | 2.21 |
| 12-03 | Gp3 | g.chr2:37082396G>A   | Missense Mutation | STRN    | p.T646I  | striatin, calmodulin binding domain 21 (0.00)                | 19 (0.42)  | 1.12 |
| 12-03 | Gp3 | g.chr10:104386940G>A | Silent            | SUFU    | p.L435L  | suppressor of fused homolog 92 (0.00)                        | 40 (0.20)  | 0.53 |
| 12-03 | Gp3 | g.chr20:46311807G>T  | Missense Mutation | SULF2   | p.S332Y  | sulfatase 2 33 (0.00)                                        | 130 (0.16) | 0.43 |
| 12-03 | Gp3 | g.chr16:28617477C>A  | Missense Mutation | SULT1A1 | p.Q225H  | sulfotransferase family, member 1 24 (0.00)                  | 224 (0.29) | 0.76 |
| 12-03 | Gp3 | g.chr14:21836520C>A  | Missense Mutation | SUPT16H | p.R288L  | suppressor of Ty 16 homolog 33 (0.00)                        | 20 (0.85)  | 1.78 |
| 12-03 | Gp3 | g.chr13:37591392G>C  | Missense Mutation | SUPT20H | p.P661R  | suppressor of Ty 20 homolog 61 (0.02)                        | 131 (0.56) | 1.49 |
| 12-03 | Gp3 | g.chr17:56424548C>T  | Splice Site       | SUPT4H1 |          | suppressor of Ty 4 homolog 55 (0.00)                         | 69 (0.42)  | 1.12 |
| 12-03 | Gp3 | g.chr17:56424592C>T  | Silent            | SUPT4H1 | p.K40K   | suppressor of Ty 4 homolog 54 (0.00)                         | 69 (0.19)  | 0.50 |
| 12-03 | Gp3 | g.chr9:95846929C>A   | Missense Mutation | SUSD3   | p.A223D  | sushi domain containing 24 (0.00)                            | 489 (0.22) | 0.58 |
| 12-03 | Gp3 | g.chr9:95846930C>A   | Silent            | SUSD3   | p.A223A  | sushi domain containing 24 (0.00)                            | 486 (0.22) | 0.58 |
| 12-03 | Gp3 | g.chr1:223402550C>T  | Missense Mutation | SUSD4   | p.C302Y  | sushi domain containing 56 (0.00)                            | 40 (0.50)  | 1.33 |
| 12-03 | Gp3 | g.chr9:113252008C>A  | Nonsense Mutation | SVEP1   | p.G595*  | sushi, von Willebrand factor 29 (0.00)                       | 23 (0.48)  | 1.28 |
| 12-03 | Gp3 | g.chr3:12209987G>A   | RNA               | SYN2    |          | synapsin II 45 (0.00)                                        | 86 (0.30)  | 0.81 |
| 12-03 | Gp3 | g.chr22:32914038C>T  | Silent            | SYN3    | p.P534P  | synapsin III 29 (0.00)                                       | 168 (0.22) | 0.59 |
| 12-03 | Gp3 | g.chr14:64678678G>A  | Splice Site       | SYNE2   |          | spectrin repeat containing 154 (0.00)                        | 184 (0.21) | 0.57 |
| 12-03 | Gp3 | g.chr6:158517268G>A  | Missense Mutation | SYNJ2   | p.G1455S | synaptojanin 2 27 (0.00)                                     | 71 (0.15)  | 0.41 |
| 12-03 | Gp3 | g.chr6:158517325C>A  | Missense Mutation | SYNJ2   | p.H1474N | synaptojanin 2 36 (0.00)                                     | 69 (0.39)  | 1.04 |
| 12-03 | Gp3 | g.chr11:61291372G>T  | Silent            | SYT7    | p.P322P  | synaptotagmin VII 51 (0.02)                                  | 138 (0.65) | 1.32 |
| 12-03 | Gp3 | g.chr11:64898767G>A  | Missense Mutation | SYVN1   | p.R246W  | synovial apoptosis inhibitor 41 (0.00)                       | 165 (0.15) | 0.56 |
| 12-03 | Gp3 | g.chr1:43891306C>T   | Missense Mutation | SZT2    | p.P936L  | seizure threshold 2 homolog 23 (0.00)                        | 63 (0.27)  | 0.72 |
| 12-03 | Gp3 | g.chr17:35797843C>T  | Missense Mutation | TADA2A  | p.S66L   | transcriptional adaptor 238 (0.00)                           | 50 (0.22)  | 0.59 |
| 12-03 | Gp3 | g.chr2:160086806G>C  | Missense Mutation | TANC1   | p.K1623N | tetratricopeptide repeat, family 56 (0.00)                   | 71 (0.18)  | 0.49 |
| 12-03 | Gp3 | g.chr16:29990384A>G  | Missense Mutation | TAOK2   | p.I148V  | TAO kinase 2 92 (0.00)                                       | 21 (0.57)  | 1.52 |
| 12-03 | Gp3 | g.chr1:6631099G>T    | Missense Mutation | TAS1R1  | p.D108Y  | taste receptor, type 1, member 43 (0.00)                     | 100 (0.62) | 1.65 |
| 12-03 | Gp3 | g.chr1:6639250G>A    | Missense Mutation | TAS1R1  | p.R711H  | taste receptor, type 1, member 28 (0.00)                     | 115 (0.21) | 0.56 |
| 12-03 | Gp3 | g.chr7:141673253G>A  | Silent            | TAS2R38 | p.T79T   | taste receptor, type 2, member 53 (0.02)                     | 19 (0.84)  | 2.25 |
| 12-03 | Gp3 | g.chr7:142919670G>A  | Missense Mutation | TAS2R40 | p.V167M  | taste receptor, type 2, member 53 (0.00)                     | 19 (0.63)  | 1.11 |

|       |     |                      |                   |                  |          |                            |             |            |      |
|-------|-----|----------------------|-------------------|------------------|----------|----------------------------|-------------|------------|------|
| 12-03 | Gp3 | g.chr3:10312656A>G   | Missense Mutation | TATDN2           | p.D597G  | TatD DNase domain coi      | 59 (0.00)   | 30 (0.27)  | 0.71 |
| 12-03 | Gp3 | g.chr4:7026740C>T    | Silent            | TBC1D14          | p.T361T  | TBC1 domain family, n      | 47 (0.00)   | 178 (0.22) | 0.58 |
| 12-03 | Gp3 | g.chr17:58088018G>A  | lincRNA           | TBC1D3P1-DHX40P1 |          | TBC1D3P1-DHX40P1           | 179 (0.00)  | 221 (0.26) | 0.70 |
| 12-03 | Gp3 | g.chr17:60344564C>T  | RNA               | TBC1D3P2         |          | TBC1 domain family, n      | 68 (0.00)   | 362 (0.19) | 0.50 |
| 12-03 | Gp3 | g.chr1:23724430T>C   | Silent            | TCEA3            | p.S154S  | transcription elongation   | 31 (0.00)   | 21 (0.52)  | 1.40 |
| 12-03 | Gp3 | g.chr22:42606957T>C  | Missense Mutation | TCF20            | p.E1452G | transcription factor 20    | 128 (0.00)  | 22 (0.23)  | 0.61 |
| 12-03 | Gp3 | g.chr16:89952281G>A  | Missense Mutation | TCF25            | p.R152H  | transcription factor 25    | 1129 (0.00) | 388 (0.20) | 0.53 |
| 12-03 | Gp3 | g.chr1:152080041G>A  | Silent            | TCHH             | p.H1884H | trichohyalin               | 35 (0.00)   | 219 (0.17) | 0.45 |
| 12-03 | Gp3 | g.chr1:152082008G>T  | Missense Mutation | TCHH             | p.P1229T | trichohyalin               | 55 (0.00)   | 96 (0.28)  | 0.75 |
| 12-03 | Gp3 | g.chr6:44250173C>A   | Missense Mutation | TCTE1            | p.A324S  | t-complex-associated-te    | 24 (0.00)   | 51 (0.20)  | 0.52 |
| 12-03 | Gp3 | g.chr10:97453182C>G  | Missense Mutation | TCTN3            | p.C103S  | tectonic family member     | 39 (0.00)   | 78 (0.45)  | 1.20 |
| 12-03 | Gp3 | g.chr6:46657117G>A   | Missense Mutation | TDRD6            | p.V418M  | tudor domain containing    | 31 (0.00)   | 41 (0.68)  | 1.82 |
| 12-03 | Gp3 | g.chr14:104472799G>C | Missense Mutation | TDRD9            | p.R596T  | tudor domain containing    | 31 (0.00)   | 35 (0.69)  | 1.83 |
| 12-03 | Gp3 | g.chr8:442579G>A     | Silent            | TDRP             | p.T126T  | testis development relat   | 59 (0.00)   | 194 (0.21) | 0.56 |
| 12-03 | Gp3 | g.chr19:14674861T>C  | Missense Mutation | TECR             | p.I112T  | trans-2,3-enoyl-CoA rec    | 23 (0.00)   | 125 (0.15) | 0.41 |
| 12-03 | Gp3 | g.chr11:78369627C>A  | Missense Mutation | TENM4            | p.A2596S | teneurin transmembrane     | 67 (0.00)   | 349 (0.17) | 0.46 |
| 12-03 | Gp3 | g.chr11:78380165G>C  | Missense Mutation | TENM4            | p.P2409A | teneurin transmembrane     | 61 (0.00)   | 142 (0.18) | 0.49 |
| 12-03 | Gp3 | g.chr2:122007190C>T  | Missense Mutation | TFCP2L1          | p.R83Q   | transcription factor CP2   | 40 (0.00)   | 47 (0.66)  | 1.76 |
| 12-03 | Gp3 | g.chr15:43585699G>T  | Missense Mutation | TGM7             | p.F47L   | transglutaminase 7         | 23 (0.00)   | 85 (0.19)  | 0.50 |
| 12-03 | Gp3 | g.chr2:242572929C>A  | Missense Mutation | THAP4            | p.G215C  | THAP domain containir      | 37 (0.00)   | 382 (0.15) | 0.40 |
| 12-03 | Gp3 | g.chr5:79354583G>A   | Silent            | THBS4            | p.L143L  | thrombospondin 4           | 22 (0.00)   | 82 (0.44)  | 0.55 |
| 12-03 | Gp3 | g.chr2:88478407C>T   | Missense Mutation | THNSL2           | p.S194F  | threonine synthase-like    | 82 (0.00)   | 13 (0.77)  | 1.62 |
| 12-03 | Gp3 | g.chr7:11675809G>T   | Missense Mutation | THSD7A           | p.Q324K  | thrombospondin, type I,    | 241 (0.00)  | 609 (0.14) | 0.38 |
| 12-03 | Gp3 | g.chr14:24026365G>A  | Silent            | THTPA            | p.L133L  | thiamine triphosphatase    | 31 (0.00)   | 40 (0.42)  | 0.89 |
| 12-03 | Gp3 | g.chr1:32042961G>C   | Missense Mutation | TINAGL1          | p.C71S   | tubulointerstitial nephrit | 35 (0.00)   | 189 (0.40) | 1.06 |
| 12-03 | Gp3 | g.chr3:53263145C>T   | Missense Mutation | TKT              | p.G425R  | transketolase              | 18 (0.00)   | 40 (0.17)  | 0.47 |
| 12-03 | Gp3 | g.chr15:63000704G>C  | Missense Mutation | TLN2             | p.V726L  | talin 2                    | 43 (0.00)   | 333 (0.14) | 0.38 |
| 12-03 | Gp3 | g.chr1:62175008G>A   | Nonsense Mutation | TM2D1            | p.R114*  | TM2 domain containing      | 72 (0.01)   | 82 (0.99)  | 2.63 |
| 12-03 | Gp3 | g.chr14:24664017T>C  | Missense Mutation | TM9SF1           | p.E279G  | transmembrane 9 superf     | 95 (0.00)   | 370 (0.63) | 1.31 |
| 12-03 | Gp3 | g.chr13:100196145A>G | Missense Mutation | TM9SF2           | p.K349R  | transmembrane 9 superf     | 23 (0.00)   | 20 (0.65)  | 1.73 |
| 12-03 | Gp3 | g.chr12:125834725G>A | Silent            | TMEM132B         | p.G260G  | transmembrane protein      | 71 (0.00)   | 155 (0.30) | 0.79 |
| 12-03 | Gp3 | g.chr19:42819230G>A  | Splice Site       | TMEM145          |          | transmembrane protein      | 25 (0.00)   | 69 (0.29)  | 0.77 |
| 12-03 | Gp3 | g.chr1:202989993C>A  | Missense Mutation | TMEM183A         | p.P288T  | transmembrane protein      | 43 (0.00)   | 30 (0.63)  | 1.37 |
| 12-03 | Gp3 | g.chr12:10342524C>T  | Missense Mutation | TMEM52B          | p.R93W   | transmembrane protein      | 15 (0.00)   | 12 (0.42)  | 1.11 |
| 12-03 | Gp3 | g.chr6:44106248G>T   | Missense Mutation | TMEM63B          | p.R134M  | transmembrane protein      | 44 (0.00)   | 124 (0.40) | 1.08 |

|       |     |                      |                   |          |          |                                      |            |      |
|-------|-----|----------------------|-------------------|----------|----------|--------------------------------------|------------|------|
| 12-03 | Gp3 | g.chr10:45430114C>G  | Silent            | TMEM72   | p.L2L    | transmembrane protein '30 (0.00)     | 55 (0.38)  | 1.02 |
| 12-03 | Gp3 | g.chr17:48356617G>T  | Missense Mutation | TMEM92   | p.R143M  | transmembrane protein '25 (0.00)     | 135 (0.73) | 1.94 |
| 12-03 | Gp3 | g.chr3:33135035C>T   | Missense Mutation | TMPPE    | p.G81D   | transmembrane protein '30 (0.00)     | 146 (0.23) | 0.62 |
| 12-03 | Gp3 | g.chr21:42843367G>A  | Intron            | TMPRSS2  |          | transmembrane protease 101 (0.00)    | 25 (0.32)  | 0.39 |
| 12-03 | Gp3 | g.chr21:42852003C>T  | Intron            | TMPRSS2  |          | transmembrane protease 48 (0.00)     | 17 (0.65)  | 0.79 |
| 12-03 | Gp3 | g.chr22:37480371G>T  | Missense Mutation | TMPRSS6  | p.P387Q  | transmembrane protease 33 (0.00)     | 35 (0.20)  | 0.53 |
| 12-03 | Gp3 | g.chr17:7286287C>T   | Silent            | TNK1     | p.L14L   | tyrosine kinase, non-rec'41 (0.00)   | 141 (0.33) | 0.72 |
| 12-03 | Gp3 | g.chr19:12817476G>A  | Silent            | TNPO2    | p.S468S  | transportin 2 27 (0.00)              | 208 (0.35) | 1.23 |
| 12-03 | Gp3 | g.chr2:218758250G>C  | Missense Mutation | TNS1     | p.P85R   | tensin 1 89 (0.00)                   | 214 (0.20) | 0.54 |
| 12-03 | Gp3 | g.chr3:25659950C>T   | Missense Mutation | TOP2B    | p.E1099K | topoisomerase (DNA) II 37 (0.00)     | 19 (0.89)  | 2.39 |
| 12-03 | Gp3 | g.chr3:133368465C>A  | Silent            | TOPBP1   | p.V422V  | topoisomerase (DNA) II 73 (0.00)     | 26 (0.62)  | 1.64 |
| 12-03 | Gp3 | g.chr17:7582909G>A   | Intron            | TP53     |          | tumor protein p53 38 (0.00)          | 115 (0.23) | 0.51 |
| 12-03 | Gp3 | g.chr17:7585446C>T   | Intron            | TP53     |          | tumor protein p53 27 (0.00)          | 79 (0.19)  | 0.41 |
| 12-03 | Gp3 | g.chr7:144320302C>T  | Missense Mutation | TPK1     | p.C104Y  | thiamin pyrophosphokin'28 (0.00)     | 25 (0.20)  | 0.53 |
| 12-03 | Gp3 | g.chr22:26932403G>T  | Missense Mutation | TPST2    | p.L298I  | tyrosylprotein sulfotrans'15 (0.00)  | 84 (0.20)  | 0.54 |
| 12-03 | Gp3 | g.chr13:45964978C>G  | RNA               | TPT1-AS1 |          | TPT1 antisense RNA 1 96 (0.00)       | 373 (0.16) | 0.44 |
| 12-03 | Gp3 | g.chr12:112589728C>A | Nonsense Mutation | TRAFD1   | p.S468*  | TRAF-type zinc finger '94 (0.00)     | 41 (0.85)  | 2.28 |
| 12-03 | Gp3 | g.chr21:45513967G>A  | Silent            | TRAPPC10 | p.V1007V | trafficking protein partic'34 (0.00) | 31 (0.19)  | 0.73 |
| 12-03 | Gp3 | g.chr4:184587563A>G  | Missense Mutation | TRAPPC11 | p.R120G  | trafficking protein partic'72 (0.00) | 25 (0.72)  | 1.92 |
| 12-03 | Gp3 | g.chr11:118889562G>T | Missense Mutation | TRAPPC4  | p.L19F   | trafficking protein partic'37 (0.00) | 656 (0.20) | 0.54 |
| 12-03 | Gp3 | g.chr8:141407832C>T  | Missense Mutation | TRAPPC9  | p.G439R  | trafficking protein partic'24 (0.00) | 17 (0.65)  | 1.73 |
| 12-03 | Gp3 | g.chr7:142428798G>T  | RNA               | TRBV28   |          | T cell receptor beta vari'37 (0.00)  | 22 (0.41)  | 0.72 |
| 12-03 | Gp3 | g.chr7:142180644C>G  | RNA               | TRBV6-5  |          | T cell receptor beta vari'71 (0.00)  | 54 (0.35)  | 0.62 |
| 12-03 | Gp3 | g.chr6:42227381C>A   | Silent            | TRERF1   | p.R655R  | transcriptional regulatin'36 (0.00)  | 179 (0.17) | 0.46 |
| 12-03 | Gp3 | g.chr6:42237063G>C   | Missense Mutation | TRERF1   | p.A89G   | transcriptional regulatin'50 (0.00)  | 92 (0.25)  | 0.67 |
| 12-03 | Gp3 | g.chr20:368679C>T    | Missense Mutation | TRIB3    | p.P9S    | tribbles pseudokinase 3 17 (0.00)    | 57 (0.28)  | 0.75 |
| 12-03 | Gp3 | g.chr4:154216772C>A  | Missense Mutation | TRIM2    | p.T338N  | tripartite motif containir'35 (0.00) | 149 (0.15) | 0.41 |
| 12-03 | Gp3 | g.chr11:6477385C>T   | Missense Mutation | TRIM3    | p.G484S  | tripartite motif containir'41 (0.00) | 174 (0.33) | 0.87 |
| 12-03 | Gp3 | g.chr17:57128689C>T  | Splice Site       | TRIM37   | p.R400R  | tripartite motif containir'63 (0.00) | 82 (0.38)  | 1.01 |
| 12-03 | Gp3 | g.chr1:155149451G>A  | Missense Mutation | TRIM46   | p.C238Y  | tripartite motif containir'39 (0.00) | 18 (0.33)  | 0.70 |
| 12-03 | Gp3 | g.chr11:55655689A>T  | Missense Mutation | TRIM51   | p.Y230F  | tripartite motif-containir'74 (0.00) | 18 (0.33)  | 0.68 |
| 12-03 | Gp3 | g.chr5:14420040C>A   | Missense Mutation | TRIO     | p.P1705T | trio Rho guanine nucleo 16 (0.00)    | 194 (0.19) | 0.51 |
| 12-03 | Gp3 | g.chr5:14508190C>T   | Missense Mutation | TRIO     | p.L2985F | trio Rho guanine nucleo 39 (0.03)    | 35 (0.69)  | 1.83 |
| 12-03 | Gp3 | g.chr1:185114625C>A  | Nonsense Mutation | TRMT1L   | p.G201*  | tRNA methyltransferase 18 (0.00)     | 10 (0.50)  | 1.33 |
| 12-03 | Gp3 | g.chr20:33637752T>A  | Missense Mutation | TRPC4AP  | p.I192F  | transient receptor potent'61 (0.00)  | 29 (0.21)  | 0.55 |

|       |     |                      |                   |          |           |                            |            |            |      |
|-------|-----|----------------------|-------------------|----------|-----------|----------------------------|------------|------------|------|
| 12-03 | Gp3 | g.chr20:33637774C>G  | Missense Mutation | TRPC4AP  | p.L184F   | transient receptor potent  | 67 (0.00)  | 30 (0.27)  | 0.71 |
| 12-03 | Gp3 | g.chr7:98497386G>A   | Missense Mutation | TRRAP    | p.A266T   | transformation/transcrip   | 33 (0.00)  | 27 (0.52)  | 1.38 |
| 12-03 | Gp3 | g.chr7:98553914T>A   | Missense Mutation | TRRAP    | p.I2002N  | transformation/transcrip   | 16 (0.00)  | 15 (0.47)  | 1.24 |
| 12-03 | Gp3 | g.chr7:98553915C>A   | Silent            | TRRAP    | p.I2002I  | transformation/transcrip   | 15 (0.00)  | 15 (0.47)  | 1.24 |
| 12-03 | Gp3 | g.chr16:2115615G>A   | Silent            | TSC2     | p.L565L   | tuberous sclerosis 2       | 37 (0.03)  | 331 (0.23) | 0.76 |
| 12-03 | Gp3 | g.chr20:51871034C>T  | Missense Mutation | TSHZ2    | p.S346F   | teashirt zinc finger hom   | 36 (0.00)  | 48 (0.23)  | 0.61 |
| 12-03 | Gp3 | g.chr20:51871440C>T  | Silent            | TSHZ2    | p.S481S   | teashirt zinc finger hom   | 143 (0.00) | 35 (0.34)  | 0.91 |
| 12-03 | Gp3 | g.chr20:51871863G>A  | Silent            | TSHZ2    | p.E622E   | teashirt zinc finger hom   | 51 (0.00)  | 185 (0.17) | 0.45 |
| 12-03 | Gp3 | g.chr16:67854759G>T  | Start Codon SNP   | TSNAXIP1 | p.M1I     | translin-associated facto  | 101 (0.01) | 478 (0.25) | 0.66 |
| 12-03 | Gp3 | g.chr1:115593112C>A  | Nonstop Mutation  | TSPAN2   | p.*222L   | tetraspanin 2              | 62 (0.00)  | 25 (0.36)  | 0.96 |
| 12-03 | Gp3 | g.chr5:112770251C>G  | Missense Mutation | TSSK1B   | p.G96R    | testis-specific serine kin | 19 (0.00)  | 32 (0.16)  | 0.42 |
| 12-03 | Gp3 | g.chr9:130488548C>A  | Silent            | TTC16    | p.S430S   | tetratricopeptide repeat   | 15 (0.00)  | 72 (0.56)  | 1.48 |
| 12-03 | Gp3 | g.chr7:138832959C>T  | Missense Mutation | TTC26    | p.L154F   | tetratricopeptide repeat   | 68 (0.00)  | 61 (0.98)  | 2.62 |
| 12-03 | Gp3 | g.chr2:32875282G>T   | Nonsense Mutation | TTC27    | p.E208*   | tetratricopeptide repeat   | 51 (0.00)  | 125 (0.16) | 0.43 |
| 12-03 | Gp3 | g.chr22:28378553G>A  | Missense Mutation | TTC28    | p.P2368S  | tetratricopeptide repeat   | 29 (0.00)  | 60 (0.20)  | 0.53 |
| 12-03 | Gp3 | g.chr2:179408047G>T  | Missense Mutation | TTN      | p.T32218N | titin                      | 28 (0.00)  | 11 (0.73)  | 1.94 |
| 12-03 | Gp3 | g.chr2:179428161A>G  | Silent            | TTN      | p.D27566D | titin                      | 54 (0.02)  | 27 (0.74)  | 1.98 |
| 12-03 | Gp3 | g.chr2:179431610C>A  | Nonsense Mutation | TTN      | p.E26417* | titin                      | 43 (0.00)  | 28 (0.86)  | 2.29 |
| 12-03 | Gp3 | g.chr2:179449409C>A  | Silent            | TTN      | p.A21653A | titin                      | 54 (0.00)  | 34 (0.21)  | 0.55 |
| 12-03 | Gp3 | g.chr2:179500726T>A  | Missense Mutation | TTN      | p.N13858Y | titin                      | 177 (0.00) | 144 (0.19) | 0.52 |
| 12-03 | Gp3 | g.chr2:179582046C>T  | Missense Mutation | TTN      | p.S8472N  | titin                      | 59 (0.00)  | 51 (0.55)  | 1.46 |
| 12-03 | Gp3 | g.chr20:57599649C>A  | Missense Mutation | TUBB1    | p.F389L   | tubulin, beta 1 class VI   | 38 (0.00)  | 117 (0.18) | 0.48 |
| 12-03 | Gp3 | g.chr13:113170869C>T | Missense Mutation | TUBGCP3  | p.M657I   | tubulin, gamma comple      | 64 (0.00)  | 74 (0.62)  | 1.66 |
| 12-03 | Gp3 | g.chr22:50659099G>A  | Missense Mutation | TUBGCP6  | p.S1230L  | tubulin, gamma comple      | 19 (0.00)  | 386 (0.20) | 0.75 |
| 12-03 | Gp3 | g.chr22:50682685G>A  | Silent            | TUBGCP6  | p.N68N    | tubulin, gamma comple      | 22 (0.00)  | 118 (0.10) | 0.39 |
| 12-03 | Gp3 | g.chr16:28856784C>T  | Missense Mutation | TUFM     | p.G89R    | Tu translation elongatio   | 22 (0.00)  | 96 (0.15)  | 0.39 |
| 12-03 | Gp3 | g.chr1:32658891A>G   | Missense Mutation | TXLNA    | p.E414G   | taxilin alpha              | 33 (0.00)  | 34 (0.15)  | 0.39 |
| 12-03 | Gp3 | g.chr15:70960206C>T  | Missense Mutation | UACA     | p.M939I   | uveal autoantigen with c   | 35 (0.00)  | 13 (0.54)  | 1.44 |
| 12-03 | Gp3 | g.chr9:33943554C>A   | Missense Mutation | UBAP2    | p.A527S   | ubiquitin associated pro   | 33 (0.00)  | 53 (0.43)  | 1.16 |
| 12-03 | Gp3 | g.chr17:16285515C>T  | Silent            | UBB      | p.T98T    | ubiquitin B                | 63 (0.00)  | 13 (0.54)  | 1.44 |
| 12-03 | Gp3 | g.chr17:74392554C>G  | Missense Mutation | UBE2O    | p.E822Q   | ubiquitin-conjugating er   | 18 (0.00)  | 220 (0.16) | 0.42 |
| 12-03 | Gp3 | g.chr17:47000256T>A  | Missense Mutation | UBE2Z    | p.V284E   | ubiquitin-conjugating er   | 71 (0.00)  | 43 (0.33)  | 0.87 |
| 12-03 | Gp3 | g.chr12:109971326C>T | Missense Mutation | UBE3B    | p.P993L   | ubiquitin protein ligase   | 151 (0.00) | 206 (0.44) | 1.18 |
| 12-03 | Gp3 | g.chr8:103301764G>A  | Nonsense Mutation | UBR5     | p.Q1538*  | ubiquitin protein ligase   | 142 (0.00) | 29 (0.24)  | 0.64 |
| 12-03 | Gp3 | g.chr2:128870680G>C  | Missense Mutation | UGGT1    | p.G182R   | UDP-glucose glycoprot      | 67 (0.00)  | 46 (0.17)  | 0.46 |

|       |     |                      |                   |             |          |                           |            |            |      |
|-------|-----|----------------------|-------------------|-------------|----------|---------------------------|------------|------------|------|
| 12-03 | Gp3 | g.chr21:43541214A>G  | Missense Mutation | UMODL1      | p.R903G  | uromodulin-like 1         | 80 (0.00)  | 67 (0.16)  | 0.62 |
| 12-03 | Gp3 | g.chr11:67766642C>T  | Splice Site       | UNC93B1     |          | unc-93 homolog B1 (C. 37  | 0.00)      | 140 (0.16) | 0.58 |
| 12-03 | Gp3 | g.chr1:229771540G>T  | Missense Mutation | URB2        | p.A394S  | URB2 ribosome biogen      | 37 (0.00)  | 98 (0.50)  | 1.33 |
| 12-03 | Gp3 | g.chr1:229772893G>T  | Missense Mutation | URB2        | p.D845Y  | URB2 ribosome biogen      | 24 (0.00)  | 22 (0.82)  | 2.18 |
| 12-03 | Gp3 | g.chr19:30477200C>T  | Silent            | URI1        | p.G63G   | URI1, prefoldin-like ch   | 42 (0.00)  | 143 (0.32) | 0.86 |
| 12-03 | Gp3 | g.chr2:61415485C>A   | Nonsense Mutation | USP34       | p.E3465* | ubiquitin specific peptid | 19 (0.00)  | 35 (0.46)  | 1.22 |
| 12-03 | Gp3 | g.chr11:77910653G>C  | Missense Mutation | USP35       | p.W273C  | ubiquitin specific peptid | 20 (0.00)  | 103 (0.72) | 1.92 |
| 12-03 | Gp3 | g.chr13:31233133G>A  | Silent            | USPL1       | p.A973A  | ubiquitin specific peptid | 27 (0.00)  | 15 (0.47)  | 1.24 |
| 12-03 | Gp3 | g.chr12:101768611T>A | Missense Mutation | UTP20       | p.L2386Q | UTP20, small subunit (S   | 35 (0.00)  | 56 (0.55)  | 1.48 |
| 12-03 | Gp3 | g.chr4:71555748C>T   | Missense Mutation | UTP3        | p.R452C  | UTP3, small subunit (S    | 88 (0.00)  | 80 (0.23)  | 0.60 |
| 12-03 | Gp3 | g.chr9:2646430C>T    | Silent            | VLDLR       | p.I527I  | very low density lipoprc  | 36 (0.00)  | 69 (0.52)  | 1.39 |
| 12-03 | Gp3 | g.chr9:2652856C>G    | Missense Mutation | VLDLR       | p.N831K  | very low density lipoprc  | 55 (0.00)  | 63 (0.16)  | 0.42 |
| 12-03 | Gp3 | g.chr1:12398321C>A   | Missense Mutation | VPS13D      | p.T2862K | vacuolar protein sorting  | 31 (0.00)  | 99 (0.91)  | 2.42 |
| 12-03 | Gp3 | g.chr15:42476770T>C  | Silent            | VPS39       | p.E221E  | vacuolar protein sorting  | 17 (0.00)  | 48 (0.19)  | 0.50 |
| 12-03 | Gp3 | g.chr1:151149186C>A  | Silent            | VPS72       | p.P354P  | vacuolar protein sorting  | 60 (0.02)  | 102 (0.24) | 0.63 |
| 12-03 | Gp3 | g.chr12:118520003T>C | Missense Mutation | VSIG10      | p.N198S  | V-set and immunoglobu     | 17 (0.00)  | 51 (0.16)  | 0.42 |
| 12-03 | Gp3 | g.chr12:118520231C>A | Missense Mutation | VSIG10      | p.G122V  | V-set and immunoglobu     | 36 (0.00)  | 64 (0.36)  | 0.96 |
| 12-03 | Gp3 | g.chr14:68126485A>G  | Missense Mutation | VTI1B       | p.M110T  | vesicle transport througl | 25 (0.00)  | 17 (0.53)  | 1.41 |
| 12-03 | Gp3 | g.chr2:98736149G>A   | Silent            | VWA3B       | p.E155E  | von Willebrand factor A   | 76 (0.01)  | 38 (0.71)  | 1.89 |
| 12-03 | Gp3 | g.chr2:98750330G>T   | Missense Mutation | VWA3B       | p.A306S  | von Willebrand factor A   | 77 (0.00)  | 165 (0.79) | 2.12 |
| 12-03 | Gp3 | g.chr7:12379974C>T   | Missense Mutation | VWDE        | p.G1447E | von Willebrand factor D   | 37 (0.00)  | 51 (0.41)  | 1.10 |
| 12-03 | Gp3 | g.chr2:74686783G>A   | Missense Mutation | WPB1        | p.C62Y   | WW domain binding pr      | 43 (0.02)  | 168 (0.17) | 0.46 |
| 12-03 | Gp3 | g.chr1:224581562G>A  | Missense Mutation | WDR26       | p.P643L  | WD repeat domain 26       | 58 (0.00)  | 12 (0.42)  | 1.11 |
| 12-03 | Gp3 | g.chr6:170064338C>T  | Silent            | WDR27       | p.V276V  | WD repeat domain 27       | 18 (0.00)  | 134 (0.27) | 0.72 |
| 12-03 | Gp3 | g.chr1:43652390C>A   | Missense Mutation | WDR65       | p.P328T  |                           | 19 (0.00)  | 15 (0.93)  | 2.49 |
| 12-03 | Gp3 | g.chr12:122396317G>C | Missense Mutation | WDR66       | p.G624R  | WD repeat domain 66       | 47 (0.00)  | 107 (0.24) | 0.65 |
| 12-03 | Gp3 | g.chr12:122404946C>A | Missense Mutation | WDR66       | p.R860S  | WD repeat domain 66       | 25 (0.00)  | 226 (0.17) | 0.45 |
| 12-03 | Gp3 | g.chr7:141408640A>G  | Missense Mutation | WEE2        | p.K28E   | WEE1 homolog 2 (S. pc     | 181 (0.00) | 29 (0.31)  | 0.83 |
| 12-03 | Gp3 | g.chr7:141422936G>T  | Missense Mutation | WEE2        | p.G295W  | WEE1 homolog 2 (S. pc     | 24 (0.00)  | 97 (0.53)  | 1.40 |
| 12-03 | Gp3 | g.chr15:23205207C>G  | RNA               | WHAMMP3     |          | WAS protein homolog a     | 46 (0.02)  | 69 (0.49)  | 1.31 |
| 12-03 | Gp3 | g.chr1:13052819C>T   | Silent            | WI2-3308P17 | p.R60R   |                           | 225 (0.00) | 124 (0.31) | 0.84 |
| 12-03 | Gp3 | g.chr12:994912G>T    | Nonsense Mutation | WNK1        | p.G1648* | WNK lysine deficient p    | 16 (0.00)  | 23 (0.30)  | 0.81 |
| 12-03 | Gp3 | g.chr9:96000573G>A   | Missense Mutation | WNK2        | p.G431E  | WNK lysine deficient p    | 24 (0.00)  | 57 (0.37)  | 0.98 |
| 12-03 | Gp3 | g.chr17:5991423C>A   | Splice Site       | WSCD1       | p.R181R  | WSC domain containin      | 38 (0.00)  | 115 (0.57) | 1.22 |
| 12-03 | Gp3 | g.chr5:167824751C>A  | Missense Mutation | WWC1        | p.S152R  | WW and C2 domain cor      | 26 (0.00)  | 90 (0.46)  | 1.21 |

|       |     |                     |                   |         |          |                           |            |            |      |
|-------|-----|---------------------|-------------------|---------|----------|---------------------------|------------|------------|------|
| 12-03 | Gp3 | g.chr16:69973284C>T | Silent            | WWP2    | p.G827G  | WW domain containing 41   | 0.00       | 228 (0.20) | 0.53 |
| 12-03 | Gp3 | g.chr8:11052698C>T  | Missense Mutation | XKR6    | p.R266K  | XK, Kell blood group c    | 17 (0.00)  | 30 (0.27)  | 0.71 |
| 12-03 | Gp3 | g.chr3:14189955C>T  | Intron            | XPC     |          | xeroderma pigmentosun     | 26 (0.00)  | 160 (0.33) | 0.57 |
| 12-03 | Gp3 | g.chr3:14194702C>T  | Intron            | XPC     |          | xeroderma pigmentosun     | 70 (0.00)  | 74 (0.96)  | 1.66 |
| 12-03 | Gp3 | g.chr3:14218929G>A  | Intron            | XPC     |          | xeroderma pigmentosun     | 74 (0.00)  | 39 (0.23)  | 0.40 |
| 12-03 | Gp3 | g.chr1:180775682G>T | Nonsense Mutation | XPR1    | p.G224*  | xenotropic and polytrop   | 40 (0.00)  | 21 (0.38)  | 1.02 |
| 12-03 | Gp3 | g.chr11:74563037G>C | Missense Mutation | XRRA1   | p.R413G  | X-ray radiation resistanc | 68 (0.00)  | 12 (0.42)  | 1.11 |
| 12-03 | Gp3 | g.chr5:112920157C>T | Missense Mutation | YTHDC2  | p.S1269F | YTH domain containing     | 53 (0.00)  | 36 (0.67)  | 1.78 |
| 12-03 | Gp3 | g.chrX:21875213C>T  | Missense Mutation | YY2     | p.A204V  | YY2 transcription facto   | 159 (0.02) | 110 (0.39) | 0.65 |
| 12-03 | Gp3 | g.chr9:129642742G>T | Missense Mutation | ZBTB34  | p.G355V  | zinc finger and BTB do    | 163 (0.00) | 248 (0.25) | 0.68 |
| 12-03 | Gp3 | g.chr9:37442280A>T  | Missense Mutation | ZBTB5   | p.M90K   | zinc finger and BTB do    | 167 (0.00) | 123 (0.17) | 0.46 |
| 12-03 | Gp3 | g.chr16:11852303G>T | Nonsense Mutation | ZC3H7A  | p.Y804*  | zinc finger CCCH-type     | 162 (0.00) | 89 (0.51)  | 1.35 |
| 12-03 | Gp3 | g.chr16:11864763G>A | Silent            | ZC3H7A  | p.T328T  | zinc finger CCCH-type     | 158 (0.02) | 23 (0.30)  | 0.81 |
| 12-03 | Gp3 | g.chr18:60242266C>A | Missense Mutation | ZCCHC2  | p.D984E  | zinc finger, CCHC dom     | 148 (0.00) | 204 (0.24) | 0.64 |
| 12-03 | Gp3 | g.chr10:99211642G>A | Nonsense Mutation | ZDHHC16 | p.W70*   | zinc finger, DHHC-type    | 20 (0.00)  | 89 (0.19)  | 0.51 |
| 12-03 | Gp3 | g.chr2:145161573C>A | Missense Mutation | ZEB2    | p.E239D  | zinc finger E-box bindin  | 39 (0.00)  | 141 (0.40) | 1.08 |
| 12-03 | Gp3 | g.chr8:135613793C>A | Missense Mutation | ZFAT    | p.Q723H  | zinc finger and AT hook   | 41 (0.00)  | 57 (0.44)  | 1.17 |
| 12-03 | Gp3 | g.chr16:72828689C>T | Missense Mutation | ZFHX3   | p.S2631N | zinc finger homeobox 3    | 154 (0.00) | 367 (0.19) | 0.49 |
| 12-03 | Gp3 | g.chr8:106813788C>T | Missense Mutation | ZFPM2   | p.P493L  | zinc finger protein, FOC  | 146 (0.00) | 72 (0.74)  | 1.96 |
| 12-03 | Gp3 | g.chr3:50379446C>A  | Splice Site       | ZMYND10 | p.Q333H  | zinc finger, MYND-typ     | 36 (0.00)  | 148 (0.16) | 0.43 |
| 12-03 | Gp3 | g.chr9:140477000G>T | Silent            | ZMYND19 | p.R227R  | zinc finger, MYND-typ     | 34 (0.03)  | 138 (0.27) | 0.71 |
| 12-03 | Gp3 | g.chr2:219510997T>A | Missense Mutation | ZNF142  | p.T450S  | zinc finger protein 142   | 31 (0.00)  | 30 (0.33)  | 0.89 |
| 12-03 | Gp3 | g.chr19:22271438T>A | Missense Mutation | ZNF257  | p.W296R  | zinc finger protein 257   | 32 (0.00)  | 12 (0.58)  | 2.00 |
| 12-03 | Gp3 | g.chr19:44590076C>A | Missense Mutation | ZNF284  | p.H149N  | zinc finger protein 284   | 56 (0.00)  | 15 (0.53)  | 1.42 |
| 12-03 | Gp3 | g.chr7:148802424C>T | Missense Mutation | ZNF425  | p.R180H  | zinc finger protein 425   | 33 (0.00)  | 47 (0.70)  | 1.87 |
| 12-03 | Gp3 | g.chr1:23688751G>A  | Missense Mutation | ZNF436  | p.S375F  | zinc finger protein 436   | 21 (0.00)  | 23 (0.43)  | 1.16 |
| 12-03 | Gp3 | g.chr19:56669911G>A | Missense Mutation | ZNF444  | p.D116N  | zinc finger protein 444   | 17 (0.00)  | 138 (0.59) | 1.58 |
| 12-03 | Gp3 | g.chr20:62597809A>G | Missense Mutation | ZNF512B | p.V240A  | zinc finger protein 512B  | 22 (0.00)  | 76 (0.28)  | 0.74 |
| 12-03 | Gp3 | g.chr4:10445193T>C  | Silent            | ZNF518B | p.A920A  | zinc finger protein 518B  | 29 (0.00)  | 18 (0.50)  | 1.33 |
| 12-03 | Gp3 | g.chr19:58774037G>T | Nonsense Mutation | ZNF544  | p.E689*  | zinc finger protein 544   | 49 (0.00)  | 29 (0.21)  | 0.55 |
| 12-03 | Gp3 | g.chr19:12429570G>T | Nonsense Mutation | ZNF563  | p.C423*  | zinc finger protein 563   | 31 (0.00)  | 15 (0.47)  | 1.63 |
| 12-03 | Gp3 | g.chr19:42582791C>T | Silent            | ZNF574  | p.Y11Y   | zinc finger protein 574   | 39 (0.00)  | 140 (0.22) | 0.59 |
| 12-03 | Gp3 | g.chr19:56895687A>T | Missense Mutation | ZNF582  | p.Y367N  | zinc finger protein 582   | 32 (0.00)  | 38 (0.55)  | 1.47 |
| 12-03 | Gp3 | g.chr19:58301683G>A | Silent            | ZNF586  | p.L26L   | zinc finger protein 586   | 24 (0.00)  | 66 (0.29)  | 0.77 |
| 12-03 | Gp3 | g.chr15:85327490G>T | Silent            | ZNF592  | p.R528R  | zinc finger protein 592   | 20 (0.00)  | 42 (0.52)  | 1.40 |

|       |             |                      |                   |            |          |                           |            |            |      |
|-------|-------------|----------------------|-------------------|------------|----------|---------------------------|------------|------------|------|
| 12-03 | Gp3         | g.chr16:3486895G>T   | Nonsense Mutation | ZNF597     | p.Y268*  | zinc finger protein 597   | 43 (0.00)  | 14 (0.50)  | 1.69 |
| 12-03 | Gp3         | g.chr19:58491321G>T  | Missense Mutation | ZNF606     | p.H243N  | zinc finger protein 606   | 28 (0.00)  | 16 (0.44)  | 1.17 |
| 12-03 | Gp3         | g.chr8:144732085G>T  | Missense Mutation | ZNF623     | p.G15C   | zinc finger protein 623   | 27 (0.00)  | 12 (0.50)  | 1.33 |
| 12-03 | Gp3         | g.chr19:23405334A>T  | Missense Mutation | ZNF724P    | p.F571L  | zinc finger protein 724,  | 17 (0.00)  | 40 (0.50)  | 1.71 |
| 12-03 | Gp3         | g.chr19:22497606G>T  | Nonsense Mutation | ZNF729     | p.E463*  | zinc finger protein 729   | 57 (0.00)  | 48 (0.83)  | 2.86 |
| 12-03 | Gp3         | g.chr19:22497721C>A  | Nonsense Mutation | ZNF729     | p.S501*  | zinc finger protein 729   | 55 (0.00)  | 35 (0.69)  | 2.35 |
| 12-03 | Gp3         | g.chr19:22497733G>A  | Missense Mutation | ZNF729     | p.R505K  | zinc finger protein 729   | 49 (0.00)  | 34 (0.68)  | 2.32 |
| 12-03 | Gp3         | g.chr17:80789407G>A  | Silent            | ZNF750     | p.F308F  | zinc finger protein 750   | 59 (0.00)  | 404 (0.15) | 0.54 |
| 12-03 | Gp3         | g.chr19:58806781G>T  | Missense Mutation | ZNF8       | p.R536I  | zinc finger protein 8     | 56 (0.00)  | 82 (0.90)  | 2.41 |
| 12-03 | Gp3         | g.chr19:20045249C>T  | Silent            | ZNF93      | p.S495S  | zinc finger protein 93    | 40 (0.00)  | 29 (0.62)  | 2.13 |
| 12-03 | Gp3         | g.chr7:99217360G>C   | Missense Mutation | ZSCAN25    | p.R44T   | zinc finger and SCAN d47  | (0.00)     | 169 (0.15) | 0.39 |
| 12-03 | Gp3         | g.chr1:45499992G>A   | Missense Mutation | ZSWIM5     | p.A814V  | zinc finger, SWIM-type 79 | (0.00)     | 64 (0.30)  | 0.79 |
| 12-03 | Gp3         | g.chr10:75558820G>A  | Missense Mutation | ZSWIM8     | p.V1408M | zinc finger, SWIM-type 30 | (0.00)     | 191 (0.28) | 0.75 |
| 12-03 | Gp3         | g.chr17:3947568G>A   | Missense Mutation | ZZEF1      | p.T2039I | zinc finger, ZZ-type wit  | 40 (0.00)  | 15 (0.67)  | 1.78 |
| 12-03 | Gp4 Focus 1 | g.chr7:48287931G>A   | Silent            | ABCA13     | p.L585L  | ATP-binding cassette, s1  | 46 (0.00)  | 27 (0.19)  | 0.49 |
| 12-03 | Gp4 Focus 1 | g.chr16:16225765C>G  | Missense Mutation | ABCC1      | p.I1313M | ATP-binding cassette, s1  | 34 (0.00)  | 17 (0.29)  | 0.62 |
| 12-03 | Gp4 Focus 1 | g.chr16:48162417C>T  | Missense Mutation | ABCC12     | p.D490N  | ATP-binding cassette, s1  | 32 (0.00)  | 15 (0.80)  | 2.13 |
| 12-03 | Gp4 Focus 1 | g.chr10:101569933G>T | Missense Mutation | ABCC2      | p.D620Y  | ATP-binding cassette, s1  | 20 (0.00)  | 34 (0.82)  | 2.20 |
| 12-03 | Gp4 Focus 1 | g.chr3:58260497A>G   | Silent            | ABHD6      | p.E212E  | abhydrolase domain con    | 61 (0.00)  | 31 (0.32)  | 0.86 |
| 12-03 | Gp4 Focus 1 | g.chr4:8009854G>T    | Missense Mutation | ABLIM2     | p.S517Y  | actin binding LIM prote   | 117 (0.00) | 30 (0.17)  | 0.44 |
| 12-03 | Gp4 Focus 1 | g.chr7:80805255T>C   | Missense Mutation | AC005008.2 | p.I42T   |                           | 21 (0.00)  | 26 (0.27)  | 0.44 |
| 12-03 | Gp4 Focus 1 | g.chr4:118496939C>T  | lincRNA           | AC092661.1 |          |                           | 52 (0.00)  | 17 (0.29)  | 0.78 |
| 12-03 | Gp4 Focus 1 | g.chr18:47318542C>A  | Missense Mutation | ACAA2      | p.V242F  | acetyl-CoA acyltransfer   | 16 (0.00)  | 27 (0.48)  | 1.28 |
| 12-03 | Gp4 Focus 1 | g.chr17:35506888C>T  | Missense Mutation | ACACA      | p.R1823Q | acetyl-CoA carboxylase    | 38 (0.00)  | 48 (0.15)  | 0.51 |
| 12-03 | Gp4 Focus 1 | g.chr3:195022739G>T  | Silent            | ACAP2      | p.I427I  | ArfGAP with coiled-coi    | 111 (0.00) | 18 (0.33)  | 0.89 |
| 12-03 | Gp4 Focus 1 | g.chr9:32430506C>T   | Missense Mutation | ACO1       | p.P554S  | aconitase 1, soluble      | 62 (0.00)  | 12 (0.58)  | 1.56 |
| 12-03 | Gp4 Focus 1 | g.chr22:41914513G>A  | Silent            | ACO2       | p.K348K  | aconitase 2, mitochondr   | 66 (0.02)  | 67 (0.39)  | 1.30 |
| 12-03 | Gp4 Focus 1 | g.chr15:78475099G>A  | Missense Mutation | ACSBG1     | p.A231V  | acyl-CoA synthetase bul   | 55 (0.00)  | 118 (0.37) | 0.99 |
| 12-03 | Gp4 Focus 1 | g.chr11:67412598C>A  | Missense Mutation | ACY3       | p.Q63H   | aspartoacylase (aminocy   | 23 (0.00)  | 121 (0.18) | 0.63 |
| 12-03 | Gp4 Focus 1 | g.chr1:155030345C>T  | Nonsense Mutation | ADAM15     | p.Q479*  | ADAM metallopeptidas      | 28 (0.00)  | 307 (0.24) | 0.63 |
| 12-03 | Gp4 Focus 1 | g.chr1:155033241C>A  | Missense Mutation | ADAM15     | p.A737E  | ADAM metallopeptidas      | 28 (0.00)  | 68 (0.16)  | 0.43 |
| 12-03 | Gp4 Focus 1 | g.chr1:120438695G>T  | Missense Mutation | ADAM30     | p.R89S   | ADAM metallopeptidas      | 19 (0.00)  | 51 (0.35)  | 0.94 |
| 12-03 | Gp4 Focus 1 | g.chr8:39181648G>A   | RNA               | ADAM5      |          | ADAM metallopeptidas      | 28 (0.00)  | 78 (0.18)  | 0.48 |
| 12-03 | Gp4 Focus 1 | g.chr8:39181682C>T   | RNA               | ADAM5      |          | ADAM metallopeptidas      | 29 (0.00)  | 86 (0.17)  | 0.47 |
| 12-03 | Gp4 Focus 1 | g.chr5:5306619C>T    | Silent            | ADAMTS16   | p.C1063C | ADAM metallopeptidas      | 40 (0.00)  | 42 (0.14)  | 0.38 |



|       |             |                      |                   |             |          |                                      |            |      |
|-------|-------------|----------------------|-------------------|-------------|----------|--------------------------------------|------------|------|
| 12-03 | Gp4 Focus 1 | g.chr6:143771730G>T  | Silent            | ADAT2       | p.T22T   | adenosine deaminase, tF33 (0.00)     | 85 (0.53)  | 1.41 |
| 12-03 | Gp4 Focus 1 | g.chr7:31142854A>T   | Silent            | ADCYAP1R1   | p.R378R  | adenylate cyclase activa 48 (0.00)   | 20 (0.40)  | 1.07 |
| 12-03 | Gp4 Focus 1 | g.chr20:49510855G>A  | Silent            | ADNP        | p.N132N  | activity-dependent neur(63 (0.00)    | 26 (0.46)  | 1.23 |
| 12-03 | Gp4 Focus 1 | g.chr18:77895561G>A  | Silent            | ADNP2       | p.L755L  | ADNP homeobox 2 39 (0.00)            | 113 (0.22) | 0.59 |
| 12-03 | Gp4 Focus 1 | g.chr2:64779863A>G   | Missense Mutation | AFTPH       | p.N419D  | aftiphilin 40 (0.00)                 | 36 (0.17)  | 0.44 |
| 12-03 | Gp4 Focus 1 | g.chr10:88768865C>A  | RNA               | AGAP11      |          | ankyrin repeat and GTP:79 (0.00)     | 113 (0.44) | 1.18 |
| 12-03 | Gp4 Focus 1 | g.chr10:51465828C>T  | Missense Mutation | AGAP7       | p.V210I  | 64 (0.00)                            | 56 (0.18)  | 0.48 |
| 12-03 | Gp4 Focus 1 | g.chr1:36372651C>T   | Missense Mutation | AGO1        | p.H505Y  | argonaute RISC catalyti 33 (0.00)    | 11 (0.55)  | 1.80 |
| 12-03 | Gp4 Focus 1 | g.chr1:230846111C>G  | Silent            | AGT         | p.L162L  | angiotensinogen (serpin 37 (0.00)    | 22 (0.36)  | 0.97 |
| 12-03 | Gp4 Focus 1 | g.chr5:432614G>A     | Silent            | AHRR        | p.L337L  | aryl-hydrocarbon recept 40 (0.00)    | 82 (0.27)  | 0.72 |
| 12-03 | Gp4 Focus 1 | g.chr7:91631003C>A   | Missense Mutation | AKAP9       | p.A591E  | A kinase (PRKA) ancho 49 (0.00)      | 13 (0.46)  | 1.23 |
| 12-03 | Gp4 Focus 1 | g.chr7:134216677T>A  | Missense Mutation | AKR1B10     | p.F84L   | aldo-keto reductase fam 131 (0.00)   | 30 (0.27)  | 0.71 |
| 12-03 | Gp4 Focus 1 | g.chr10:5138681A>T   | Missense Mutation | AKR1C3      | p.Y55F   | aldo-keto reductase fam 71 (0.00)    | 52 (0.23)  | 0.62 |
| 12-03 | Gp4 Focus 1 | g.chr2:31756476C>T   | RNA               | AL133247.2  |          | 26 (0.00)                            | 37 (0.70)  | 1.87 |
| 12-03 | Gp4 Focus 1 | g.chr2:73896260C>T   | RNA               | ALMS1P      |          | Alstrom syndrome 1 pse 21 (0.00)     | 29 (0.24)  | 0.64 |
| 12-03 | Gp4 Focus 1 | g.chr15:85400130G>T  | Nonsense Mutation | ALPK3       | p.E923*  | alpha-kinase 3 57 (0.00)             | 120 (0.25) | 0.67 |
| 12-03 | Gp4 Focus 1 | g.chr11:46529791G>A  | Silent            | AMBRA1      | p.D673D  | autophagy/beclin-1 regu 60 (0.00)    | 52 (0.31)  | 0.82 |
| 12-03 | Gp4 Focus 1 | g.chr12:121747602G>T | Missense Mutation | ANAPC5      | p.A653D  | anaphase promoting con 39 (0.00)     | 59 (0.14)  | 0.47 |
| 12-03 | Gp4 Focus 1 | g.chr8:41557967C>G   | Missense Mutation | ANK1        | p.A856P  | ankyrin 1, erythrocytic 98 (0.00)    | 32 (0.19)  | 0.50 |
| 12-03 | Gp4 Focus 1 | g.chr4:114257154C>G  | Missense Mutation | ANK2        | p.Q1145E | ankyrin 2, neuronal 45 (0.00)        | 16 (0.50)  | 1.33 |
| 12-03 | Gp4 Focus 1 | g.chr9:95575834G>A   | RNA               | ANKRD19P    |          | ankyrin repeat domain 126 (0.00)     | 13 (0.54)  | 1.80 |
| 12-03 | Gp4 Focus 1 | g.chr7:36435874G>A   | Splice Site       | ANLN        |          | anillin, actin binding prc 40 (0.00) | 15 (0.60)  | 1.60 |
| 12-03 | Gp4 Focus 1 | g.chr15:90335720G>T  | Missense Mutation | ANPEP       | p.L775I  | alanyl (membrane) amir 29 (0.00)     | 36 (0.19)  | 0.52 |
| 12-03 | Gp4 Focus 1 | g.chr7:150554105G>T  | Missense Mutation | AOC1        | p.A183S  | amine oxidase, copper c 27 (0.00)    | 38 (0.32)  | 1.18 |
| 12-03 | Gp4 Focus 1 | g.chr17:41003592C>A  | Silent            | AOC3        | p.R78R   | amine oxidase, copper c 50 (0.00)    | 307 (0.18) | 0.62 |
| 12-03 | Gp4 Focus 1 | g.chr11:64942742C>A  | RNA               | AP003068.18 |          | 20 (0.00)                            | 54 (0.59)  | 2.05 |
| 12-03 | Gp4 Focus 1 | g.chr19:2138654T>G   | Silent            | AP3D1       | p.I52I   | adaptor-related protein c 61 (0.00)  | 223 (0.14) | 0.55 |
| 12-03 | Gp4 Focus 1 | g.chr11:129996682C>A | Missense Mutation | APLP2       | p.A393D  | amyloid beta (A4) precu 96 (0.00)    | 17 (0.29)  | 0.78 |
| 12-03 | Gp4 Focus 1 | g.chr12:56755618G>T  | Silent            | APOF        | p.I124I  | apolipoprotein F 45 (0.00)           | 34 (0.15)  | 0.39 |
| 12-03 | Gp4 Focus 1 | g.chr11:46700752G>A  | Silent            | ARHGAP1     | p.N385N  | Rho GTPase activating j 28 (0.00)    | 246 (0.48) | 1.29 |
| 12-03 | Gp4 Focus 1 | g.chr10:24908662G>A  | Missense Mutation | ARHGAP21    | p.A721V  | Rho GTPase activating j 45 (0.00)    | 19 (0.79)  | 2.11 |
| 12-03 | Gp4 Focus 1 | g.chr19:47425554G>A  | Missense Mutation | ARHGAP35    | p.E1208K | Rho GTPase activating j 168 (0.01)   | 54 (0.41)  | 1.46 |
| 12-03 | Gp4 Focus 1 | g.chr11:73063938G>T  | Nonsense Mutation | ARHGEF17    | p.E1112* | Rho guanine nucleotide 16 (0.00)     | 95 (0.15)  | 0.53 |
| 12-03 | Gp4 Focus 1 | g.chr7:144063460C>T  | Missense Mutation | ARHGEF5     | p.P1056L | Rho guanine nucleotide 117 (0.00)    | 14 (0.57)  | 0.91 |
| 12-03 | Gp4 Focus 1 | g.chr12:50472324G>T  | Missense Mutation | ASIC1       | p.V320L  | acid-sensing (proton-gat 30 (0.00)   | 69 (0.20)  | 0.54 |

|       |             |                      |                   |         |          |                                        |            |            |      |
|-------|-------------|----------------------|-------------------|---------|----------|----------------------------------------|------------|------------|------|
| 12-03 | Gp4 Focus 1 | g.chr9:133364740G>A  | Missense Mutation | ASS1    | p.G287S  | argininosuccinate synthase 1 (0.00)    | 31 (0.19)  | 0.66       |      |
| 12-03 | Gp4 Focus 1 | g.chr2:25966265G>A   | Missense Mutation | ASXL2   | p.P981S  | additional sex combs like 1 (0.00)     | 45 (0.20)  | 0.53       |      |
| 12-03 | Gp4 Focus 1 | g.chr15:25924550A>G  | Missense Mutation | ATP10A  | p.S1480P | ATPase, class V, type 1 (0.00)         | 34 (0.15)  | 0.39       |      |
| 12-03 | Gp4 Focus 1 | g.chr19:19756736C>A  | Missense Mutation | ATP13A1 | p.V1103F | ATPase type 13A1 (0.00)                | 20 (0.00)  | 103 (0.12) | 0.41 |
| 12-03 | Gp4 Focus 1 | g.chr1:160106789C>A  | Silent            | ATP1A2  | p.T936T  | ATPase, Na+/K+ transport (0.00)        | 25 (0.00)  | 44 (0.34)  | 0.67 |
| 12-03 | Gp4 Focus 1 | g.chr1:203667323C>T  | Nonsense Mutation | ATP2B4  | p.Q78*   | ATPase, Ca++ transport (0.00)          | 29 (0.00)  | 18 (0.72)  | 1.93 |
| 12-03 | Gp4 Focus 1 | g.chr2:176043958C>T  | Silent            | ATP5G3  | p.G47G   | ATP synthase, H+ transport (0.00)      | 38 (0.00)  | 28 (0.29)  | 0.76 |
| 12-03 | Gp4 Focus 1 | g.chrX:77243862C>T   | Missense Mutation | ATP7A   | p.P82L   | ATPase, Cu++ transport (0.00)          | 75 (0.00)  | 17 (0.47)  | 0.78 |
| 12-03 | Gp4 Focus 1 | g.chrX:77245118G>T   | Missense Mutation | ATP7A   | p.A334S  | ATPase, Cu++ transport (0.00)          | 34 (0.00)  | 21 (0.24)  | 0.40 |
| 12-03 | Gp4 Focus 1 | g.chr18:77108169C>T  | Missense Mutation | ATP9B   | p.P959L  | ATPase, class II, type 9 (0.00)        | 156 (0.00) | 73 (0.25)  | 0.66 |
| 12-03 | Gp4 Focus 1 | g.chr20:3581671G>T   | Splice Site       | ATRNL   | p.A1215S | attractin (0.00)                       | 52 (0.00)  | 71 (0.51)  | 1.35 |
| 12-03 | Gp4 Focus 1 | g.chr1:26161605C>T   | Missense Mutation | AUNIP   | p.G318E  | aurora kinase A and nuclear (0.00)     | 84 (0.00)  | 89 (0.28)  | 0.75 |
| 12-03 | Gp4 Focus 1 | g.chr19:41727125C>T  | Missense Mutation | AXL     | p.S128F  | AXL receptor tyrosine kinase (0.00)    | 19 (0.00)  | 35 (0.29)  | 0.76 |
| 12-03 | Gp4 Focus 1 | g.chr1:193150193C>A  | Missense Mutation | B3GALT2 | p.R167I  | UDP-Gal:betaGlcNAc 6-epimerase (0.00)  | 45 (0.00)  | 15 (0.80)  | 2.13 |
| 12-03 | Gp4 Focus 1 | g.chr14:104026416C>T | Silent            | BAG5    | p.E362E  | BCL2-associated athanogene 5 (0.00)    | 57 (0.00)  | 39 (0.23)  | 0.62 |
| 12-03 | Gp4 Focus 1 | g.chr22:23656244C>T  | Silent            | BCR     | p.L1183L | breakpoint cluster region (0.00)       | 30 (0.00)  | 338 (0.15) | 0.52 |
| 12-03 | Gp4 Focus 1 | g.chr10:60577443G>A  | Silent            | BICC1   | p.L885L  | BicC family RNA binding (0.00)         | 35 (0.00)  | 15 (0.47)  | 1.24 |
| 12-03 | Gp4 Focus 1 | g.chr9:95482761C>A   | Missense Mutation | BICD2   | p.D295Y  | bicaudal D homolog 2 (0.00)            | 136 (0.00) | 200 (0.22) | 0.74 |
| 12-03 | Gp4 Focus 1 | g.chr2:32626388C>A   | Missense Mutation | BIRC6   | p.H398N  | baculoviral IAP repeat c94 (0.00)      | 94 (0.00)  | 273 (0.39) | 1.05 |
| 12-03 | Gp4 Focus 1 | g.chr2:32626433G>A   | Missense Mutation | BIRC6   | p.D413N  | baculoviral IAP repeat c100 (0.00)     | 100 (0.00) | 18 (0.28)  | 0.74 |
| 12-03 | Gp4 Focus 1 | g.chr2:32694588C>A   | Missense Mutation | BIRC6   | p.L2085M | baculoviral IAP repeat c98 (0.00)      | 98 (0.00)  | 26 (0.23)  | 0.62 |
| 12-03 | Gp4 Focus 1 | g.chr15:91267806C>A  | Intron            | BLM     |          | Bloom syndrome, RecQ108 (0.00)         | 108 (0.00) | 30 (0.40)  | 1.07 |
| 12-03 | Gp4 Focus 1 | g.chr15:91287530T>A  | Intron            | BLM     |          | Bloom syndrome, RecQ29 (0.00)          | 29 (0.00)  | 10 (0.50)  | 1.33 |
| 12-03 | Gp4 Focus 1 | g.chr15:91339973G>T  | Intron            | BLM     |          | Bloom syndrome, RecQ86 (0.00)          | 86 (0.00)  | 14 (0.36)  | 0.95 |
| 12-03 | Gp4 Focus 1 | g.chr5:172586971G>T  | Missense Mutation | BNIP1   | p.S136I  | BCL2/adenovirus E1B 127 (0.00)         | 127 (0.00) | 48 (0.52)  | 1.39 |
| 12-03 | Gp4 Focus 1 | g.chr18:54814880G>A  | Missense Mutation | BOD1L2  | p.E113K  | biorientation of chromosome 16 (0.00)  | 16 (0.00)  | 78 (0.15)  | 0.41 |
| 12-03 | Gp4 Focus 1 | g.chr17:41210973G>A  | Intron            | BRCA1   |          | breast cancer 1, early onset (0.00)    | 38 (0.00)  | 29 (0.41)  | 1.10 |
| 12-03 | Gp4 Focus 1 | g.chr17:41235586A>G  | Intron            | BRCA1   |          | breast cancer 1, early onset (0.00)    | 45 (0.00)  | 16 (0.62)  | 1.67 |
| 12-03 | Gp4 Focus 1 | g.chr17:41242240C>T  | Intron            | BRCA1   |          | breast cancer 1, early onset (0.00)    | 37 (0.00)  | 137 (0.18) | 0.47 |
| 12-03 | Gp4 Focus 1 | g.chr13:32928595G>C  | Intron            | BRCA2   |          | breast cancer 2, early onset (0.00)    | 100 (0.00) | 24 (0.62)  | 0.81 |
| 12-03 | Gp4 Focus 1 | g.chr19:15355544G>C  | Missense Mutation | BRD4    | p.H730D  | bromodomain containing (0.00)          | 27 (0.00)  | 51 (0.22)  | 0.76 |
| 12-03 | Gp4 Focus 1 | g.chr19:15375568C>T  | Missense Mutation | BRD4    | p.G287R  | bromodomain containing (0.00)          | 63 (0.00)  | 268 (0.32) | 1.14 |
| 12-03 | Gp4 Focus 1 | g.chr5:886707C>T     | Splice Site       | BRD9    | p.S278N  | bromodomain containing (0.00)          | 99 (0.00)  | 287 (0.21) | 0.55 |
| 12-03 | Gp4 Focus 1 | g.chr21:40572285G>T  | Missense Mutation | BRWD1   | p.T1538N | bromodomain and WD40 (0.00)            | 136 (0.00) | 35 (0.14)  | 0.38 |
| 12-03 | Gp4 Focus 1 | g.chr3:49689913C>A   | Missense Mutation | BSN     | p.S975Y  | bassoon presynaptic cytoplasmic (0.00) | 15 (0.00)  | 412 (0.18) | 0.47 |

|       |             |                      |                   |           |          |                                              |            |      |
|-------|-------------|----------------------|-------------------|-----------|----------|----------------------------------------------|------------|------|
| 12-03 | Gp4 Focus 1 | g.chr6:26423195C>T   | RNA               | BTN2A3P   |          | butyrophilin, subfamily 32 (0.00)            | 46 (0.33)  | 0.87 |
| 12-03 | Gp4 Focus 1 | g.chr6:105563609C>T  | Missense Mutation | BVES      | p.D304N  | blood vessel epicardial $\epsilon$ 30 (0.00) | 19 (0.37)  | 0.46 |
| 12-03 | Gp4 Focus 1 | g.chr10:115885779G>A | Missense Mutation | C10orf118 | p.R827W  | 53 (0.00)                                    | 14 (0.93)  | 2.48 |
| 12-03 | Gp4 Focus 1 | g.chr10:98744457G>A  | Missense Mutation | C10orf12  | p.G1104R | chromosome 10 open re 50 (0.00)              | 31 (0.32)  | 0.86 |
| 12-03 | Gp4 Focus 1 | g.chr16:67166423C>T  | Missense Mutation | C16orf70  | p.P117L  | chromosome 16 open re 34 (0.00)              | 37 (0.78)  | 2.09 |
| 12-03 | Gp4 Focus 1 | g.chr16:67180219C>A  | Missense Mutation | C16orf70  | p.T383K  | chromosome 16 open re 27 (0.00)              | 14 (0.86)  | 2.29 |
| 12-03 | Gp4 Focus 1 | g.chr16:5115803G>C   | Missense Mutation | C16orf89  | p.A36G   | chromosome 16 open re 23 (0.00)              | 123 (0.15) | 0.51 |
| 12-03 | Gp4 Focus 1 | g.chr17:42744869T>A  | Missense Mutation | C17orf104 | p.N530K  | chromosome 17 open re 28 (0.00)              | 36 (0.31)  | 1.10 |
| 12-03 | Gp4 Focus 1 | g.chr1:244803275G>T  | Silent            | C1orf101  | p.L916L  | chromosome 1 open rea 122 (0.00)             | 13 (0.46)  | 1.23 |
| 12-03 | Gp4 Focus 1 | g.chr1:150259248G>A  | Missense Mutation | C1orf51   | p.S347N  | 64 (0.00)                                    | 111 (0.42) | 1.58 |
| 12-03 | Gp4 Focus 1 | g.chr1:25571693G>A   | Missense Mutation | C1orf63   | p.A207V  | 70 (0.00)                                    | 84 (0.30)  | 0.79 |
| 12-03 | Gp4 Focus 1 | g.chr1:22974246C>A   | Silent            | C1QC      | p.V236V  | complement component 48 (0.00)               | 64 (0.16)  | 0.42 |
| 12-03 | Gp4 Focus 1 | g.chr21:43523939G>T  | Silent            | C21orf128 | p.V98V   | chromosome 21 open re 59 (0.00)              | 199 (0.16) | 0.61 |
| 12-03 | Gp4 Focus 1 | g.chr2:200820968G>A  | Silent            | C2orf47   | p.K149K  | chromosome 2 open rea 62 (0.00)              | 87 (0.17)  | 0.46 |
| 12-03 | Gp4 Focus 1 | g.chr2:232457708T>C  | Missense Mutation | C2orf57   | p.S16P   | chromosome 2 open rea 26 (0.00)              | 56 (0.38)  | 1.00 |
| 12-03 | Gp4 Focus 1 | g.chr2:29294779A>G   | Silent            | C2orf71   | p.I783I  | chromosome 2 open rea 22 (0.00)              | 38 (0.37)  | 0.98 |
| 12-03 | Gp4 Focus 1 | g.chr3:118865414G>T  | Missense Mutation | C3orf30   | p.Q126H  | chromosome 3 open rea 23 (0.00)              | 12 (0.50)  | 1.33 |
| 12-03 | Gp4 Focus 1 | g.chr3:138669336G>T  | Missense Mutation | C3orf72   | p.E150D  | 19 (0.00)                                    | 28 (0.29)  | 0.76 |
| 12-03 | Gp4 Focus 1 | g.chr7:99754574A>T   | Missense Mutation | C7orf43   | p.L296Q  | chromosome 7 open rea 23 (0.00)              | 60 (0.20)  | 0.53 |
| 12-03 | Gp4 Focus 1 | g.chr9:35044926G>A   | Nonsense Mutation | C9orf131  | p.W767*  | chromosome 9 open rea 69 (0.00)              | 33 (0.15)  | 0.40 |
| 12-03 | Gp4 Focus 1 | g.chr17:50008368G>A  | Silent            | CA10      | p.I87I   | carbonic anhydrase X 104 (0.00)              | 36 (0.33)  | 0.89 |
| 12-03 | Gp4 Focus 1 | g.chr8:86354387G>T   | Missense Mutation | CA3       | p.E106D  | carbonic anhydrase III, $\mu$ 19 (0.00)      | 14 (0.43)  | 1.14 |
| 12-03 | Gp4 Focus 1 | g.chr17:58234870C>T  | Silent            | CA4       | p.H117H  | carbonic anhydrase IV 43 (0.00)              | 104 (0.12) | 0.41 |
| 12-03 | Gp4 Focus 1 | g.chr1:65047903T>C   | Missense Mutation | CACHD1    | p.V58A   | cache domain containing 45 (0.00)            | 13 (0.62)  | 1.64 |
| 12-03 | Gp4 Focus 1 | g.chr3:85037443C>A   | Intron            | CADM2     |          | cell adhesion molecule 264 (0.00)            | 32 (0.41)  | 1.08 |
| 12-03 | Gp4 Focus 1 | g.chr3:85117375C>A   | Intron            | CADM2     |          | cell adhesion molecule 230 (0.00)            | 29 (0.28)  | 0.74 |
| 12-03 | Gp4 Focus 1 | g.chr3:85133189C>T   | Intron            | CADM2     |          | cell adhesion molecule 251 (0.00)            | 14 (0.79)  | 2.10 |
| 12-03 | Gp4 Focus 1 | g.chr3:85155437T>C   | Intron            | CADM2     |          | cell adhesion molecule 2115 (0.00)           | 100 (0.48) | 1.28 |
| 12-03 | Gp4 Focus 1 | g.chr3:85165016C>A   | Intron            | CADM2     |          | cell adhesion molecule 248 (0.00)            | 30 (0.17)  | 0.44 |
| 12-03 | Gp4 Focus 1 | g.chr3:85219259T>A   | Intron            | CADM2     |          | cell adhesion molecule 233 (0.00)            | 17 (0.76)  | 2.04 |
| 12-03 | Gp4 Focus 1 | g.chr3:85219260T>A   | Intron            | CADM2     |          | cell adhesion molecule 233 (0.00)            | 17 (0.41)  | 1.10 |
| 12-03 | Gp4 Focus 1 | g.chr3:85348943G>A   | Intron            | CADM2     |          | cell adhesion molecule 226 (0.00)            | 15 (0.40)  | 1.07 |
| 12-03 | Gp4 Focus 1 | g.chr3:85387326G>A   | Intron            | CADM2     |          | cell adhesion molecule 234 (0.00)            | 26 (0.54)  | 1.44 |
| 12-03 | Gp4 Focus 1 | g.chr3:85408116C>G   | Intron            | CADM2     |          | cell adhesion molecule 239 (0.00)            | 47 (0.30)  | 0.79 |
| 12-03 | Gp4 Focus 1 | g.chr3:85593887G>T   | Intron            | CADM2     |          | cell adhesion molecule 233 (0.00)            | 25 (0.64)  | 1.71 |

|       |             |                      |                   |          |          |                                     |            |      |
|-------|-------------|----------------------|-------------------|----------|----------|-------------------------------------|------------|------|
| 12-03 | Gp4 Focus 1 | g.chr3:85830339T>C   | Intron            | CADM2    |          | cell adhesion molecule 234 (0.00)   | 16 (0.31)  | 0.83 |
| 12-03 | Gp4 Focus 1 | g.chr3:85953016G>C   | Intron            | CADM2    |          | cell adhesion molecule 249 (0.00)   | 40 (0.93)  | 2.47 |
| 12-03 | Gp4 Focus 1 | g.chr4:114378594G>T  | Missense Mutation | CAMK2D   | p.P444T  | calcium/calmodulin-dep 17 (0.00)    | 12 (0.67)  | 1.78 |
| 12-03 | Gp4 Focus 1 | g.chr1:7737671G>A    | Missense Mutation | CAMTA1   | p.G931D  | calmodulin binding tran 37 (0.00)   | 72 (0.36)  | 0.96 |
| 12-03 | Gp4 Focus 1 | g.chr17:38320272C>T  | Missense Mutation | CASC3    | p.P442S  | cancer susceptibility car 65 (0.00) | 59 (0.17)  | 0.45 |
| 12-03 | Gp4 Focus 1 | g.chr17:38325576G>A  | Splice Site       | CASC3    |          | cancer susceptibility car 26 (0.00) | 22 (0.23)  | 0.61 |
| 12-03 | Gp4 Focus 1 | g.chr19:15164721G>A  | Missense Mutation | CASP14   | p.A119T  | caspase 14, apoptosis-re 18 (0.00)  | 17 (0.29)  | 1.04 |
| 12-03 | Gp4 Focus 1 | g.chr10:115489137G>A | Silent            | CASP7    | p.E250E  | caspase 7, apoptosis-rel; 26 (0.00) | 30 (0.33)  | 0.89 |
| 12-03 | Gp4 Focus 1 | g.chr3:122003300C>T  | Silent            | CASR     | p.V833V  | calcium-sensing recepto 18 (0.00)   | 93 (0.26)  | 0.69 |
| 12-03 | Gp4 Focus 1 | g.chr19:15132436A>G  | Silent            | CCDC105  | p.L350L  | coiled-coil domain cont; 38 (0.00)  | 184 (0.12) | 0.44 |
| 12-03 | Gp4 Focus 1 | g.chr7:23682712A>G   | Missense Mutation | CCDC126  | p.N134S  | coiled-coil domain cont; 31 (0.00)  | 12 (0.42)  | 1.11 |
| 12-03 | Gp4 Focus 1 | g.chr9:100132942T>C  | Missense Mutation | CCDC180  | p.L1501P | coiled-coil domain cont; 19 (0.00)  | 57 (0.21)  | 0.56 |
| 12-03 | Gp4 Focus 1 | g.chr17:61843313C>T  | Missense Mutation | CCDC47   | p.D75N   | coiled-coil domain cont; 22 (0.00)  | 21 (0.38)  | 1.02 |
| 12-03 | Gp4 Focus 1 | g.chr12:49308336C>A  | Silent            | CCDC65   | p.T150T  | coiled-coil domain cont; 20 (0.00)  | 44 (0.25)  | 0.67 |
| 12-03 | Gp4 Focus 1 | g.chr3:56627971G>A   | Splice Site       | CCDC66   |          | coiled-coil domain cont; 48 (0.00)  | 23 (0.26)  | 0.70 |
| 12-03 | Gp4 Focus 1 | g.chr5:150563988C>T  | Silent            | CCDC69   | p.L210L  | coiled-coil domain cont; 24 (0.00)  | 52 (0.33)  | 0.58 |
| 12-03 | Gp4 Focus 1 | g.chr2:132289323C>G  | Missense Mutation | CCDC74A  | p.L211V  | coiled-coil domain cont; 78 (0.00)  | 120 (0.23) | 0.83 |
| 12-03 | Gp4 Focus 1 | g.chr3:112358219C>A  | Missense Mutation | CCDC80   | p.E178D  | coiled-coil domain cont; 37 (0.00)  | 11 (0.82)  | 2.18 |
| 12-03 | Gp4 Focus 1 | g.chr11:85627204G>A  | Silent            | CCDC83   | p.E336E  | coiled-coil domain cont; 48 (0.00)  | 17 (0.76)  | 2.04 |
| 12-03 | Gp4 Focus 1 | g.chr12:124427326G>A | Missense Mutation | CCDC92   | p.T46I   | coiled-coil domain cont; 56 (0.00)  | 54 (0.19)  | 0.49 |
| 12-03 | Gp4 Focus 1 | g.chr10:97816730G>A  | Missense Mutation | CCNJ     | p.D185N  | cyclin J 26 (0.00)                  | 51 (0.31)  | 0.84 |
| 12-03 | Gp4 Focus 1 | g.chr3:46414922A>G   | Missense Mutation | CCR5     | p.T177A  | chemokine (C-C motif) 53 (0.00)     | 169 (0.40) | 1.35 |
| 12-03 | Gp4 Focus 1 | g.chr7:56122136G>A   | Silent            | CCT6A    | p.T92T   | chaperonin containing T 38 (0.00)   | 22 (0.23)  | 0.61 |
| 12-03 | Gp4 Focus 1 | g.chr7:5944759T>A    | Missense Mutation | CCZ1     | p.L186Q  | CCZ1 vacuolar protein t 98 (0.00)   | 13 (0.85)  | 2.26 |
| 12-03 | Gp4 Focus 1 | g.chr1:117556076G>C  | Missense Mutation | CD101    | p.G297A  | CD101 molecule 65 (0.00)            | 122 (0.41) | 1.09 |
| 12-03 | Gp4 Focus 1 | g.chr1:167400948G>A  | Silent            | CD247    | p.A155A  | CD247 molecule 55 (0.00)            | 26 (0.50)  | 1.33 |
| 12-03 | Gp4 Focus 1 | g.chr12:6554606G>A   | Silent            | CD27     | p.K51K   | CD27 molecule 46 (0.00)             | 44 (0.43)  | 1.15 |
| 12-03 | Gp4 Focus 1 | g.chr1:207510097C>T  | Missense Mutation | CD55     | p.P241S  | CD55 molecule, decay ε 55 (0.00)    | 58 (0.29)  | 0.78 |
| 12-03 | Gp4 Focus 1 | g.chr9:35612930G>A   | Missense Mutation | CD72     | p.T250I  | CD72 molecule 29 (0.00)             | 34 (0.15)  | 0.39 |
| 12-03 | Gp4 Focus 1 | g.chr14:103466000G>A | Silent            | CDC42BPB | p.S166S  | CDC42 binding protein 18 (0.00)     | 30 (0.37)  | 0.98 |
| 12-03 | Gp4 Focus 1 | g.chr17:38445782C>T  | Missense Mutation | CDC6     | p.T37I   | cell division cycle 6 33 (0.00)     | 26 (0.23)  | 0.62 |
| 12-03 | Gp4 Focus 1 | g.chr16:68849596G>C  | Missense Mutation | CDH1     | p.G500A  | cadherin 1, type 1, E-ca 35 (0.00)  | 28 (0.18)  | 0.61 |
| 12-03 | Gp4 Focus 1 | g.chr10:73491815G>A  | Missense Mutation | CDH23    | p.G1268R | cadherin-related 23 62 (0.00)       | 44 (0.43)  | 1.48 |
| 12-03 | Gp4 Focus 1 | g.chr5:176011676G>T  | Silent            | CDHR2    | p.V798V  | cadherin-related family 28 (0.00)   | 82 (0.16)  | 0.42 |
| 12-03 | Gp4 Focus 1 | g.chr7:105658411C>A  | Missense Mutation | CDHR3    | p.P516T  | cadherin-related family 62 (0.00)   | 19 (0.37)  | 0.98 |

|       |             |                      |                   |          |          |                                     |            |      |
|-------|-------------|----------------------|-------------------|----------|----------|-------------------------------------|------------|------|
| 12-03 | Gp4 Focus 1 | g.chr17:37686906C>A  | Silent            | CDK12    | p.P1270P | cyclin-dependent kinase 43 (0.00)   | 45 (0.16)  | 0.41 |
| 12-03 | Gp4 Focus 1 | g.chr17:37687013C>A  | Missense Mutation | CDK12    | p.S1306Y | cyclin-dependent kinase 55 (0.00)   | 32 (0.25)  | 0.67 |
| 12-03 | Gp4 Focus 1 | g.chr19:51983921G>T  | Missense Mutation | CEACAM18 | p.W129C  | carcinoembryonic antigen 108 (0.00) | 32 (0.25)  | 0.89 |
| 12-03 | Gp4 Focus 1 | g.chr1:109794090C>A  | Missense Mutation | CELSR2   | p.D463E  | cadherin, EGF LAG sev 34 (0.00)     | 42 (0.33)  | 0.89 |
| 12-03 | Gp4 Focus 1 | g.chr1:109804193C>G  | Missense Mutation | CELSR2   | p.H1414D | cadherin, EGF LAG sev 55 (0.00)     | 90 (0.22)  | 0.59 |
| 12-03 | Gp4 Focus 1 | g.chr3:48691068C>A   | Missense Mutation | CELSR3   | p.S1811I | cadherin, EGF LAG sev 64 (0.00)     | 37 (0.16)  | 0.43 |
| 12-03 | Gp4 Focus 1 | g.chr16:67862671C>A  | Silent            | CENPT    | p.R452R  | centromere protein T 23 (0.00)      | 84 (0.29)  | 0.97 |
| 12-03 | Gp4 Focus 1 | g.chr14:81251425C>T  | Silent            | CEP128   | p.R675R  | centrosomal protein 12829 (0.00)    | 25 (0.48)  | 1.28 |
| 12-03 | Gp4 Focus 1 | g.chr4:56886910C>T   | Missense Mutation | CEP135   | p.A1095V | centrosomal protein 13562 (0.00)    | 27 (0.26)  | 0.69 |
| 12-03 | Gp4 Focus 1 | g.chr11:117265692G>A | Silent            | CEP164   | p.K939K  | centrosomal protein 16434 (0.00)    | 294 (0.32) | 0.86 |
| 12-03 | Gp4 Focus 1 | g.chr11:117267908G>A | Missense Mutation | CEP164   | p.R1127Q | centrosomal protein 16422 (0.00)    | 92 (0.14)  | 0.38 |
| 12-03 | Gp4 Focus 1 | g.chr9:131186753G>A  | Missense Mutation | CERCAM   | p.R209H  | cerebral endothelial cell 20 (0.00) | 50 (0.28)  | 0.75 |
| 12-03 | Gp4 Focus 1 | g.chr16:55860091G>T  | Missense Mutation | CES1     | p.A126D  | carboxylesterase 1 131 (0.00)       | 46 (0.91)  | 2.43 |
| 12-03 | Gp4 Focus 1 | g.chr1:6167647G>A    | Intron            | CHD5     |          | chromodomain helicase 18 (0.00)     | 325 (0.36) | 0.95 |
| 12-03 | Gp4 Focus 1 | g.chr1:6182469C>A    | Intron            | CHD5     |          | chromodomain helicase 83 (0.00)     | 272 (0.19) | 0.51 |
| 12-03 | Gp4 Focus 1 | g.chr1:6186930C>T    | Intron            | CHD5     |          | chromodomain helicase 39 (0.00)     | 242 (0.18) | 0.48 |
| 12-03 | Gp4 Focus 1 | g.chr1:6212402C>G    | Intron            | CHD5     |          | chromodomain helicase 20 (0.00)     | 36 (0.19)  | 0.52 |
| 12-03 | Gp4 Focus 1 | g.chr1:6222685G>A    | Intron            | CHD5     |          | chromodomain helicase 28 (0.00)     | 177 (0.14) | 0.38 |
| 12-03 | Gp4 Focus 1 | g.chr1:6227543C>A    | Intron            | CHD5     |          | chromodomain helicase 22 (0.00)     | 93 (0.28)  | 0.75 |
| 12-03 | Gp4 Focus 1 | g.chr1:6228706T>C    | Intron            | CHD5     |          | chromodomain helicase 109 (0.00)    | 53 (0.19)  | 0.50 |
| 12-03 | Gp4 Focus 1 | g.chr15:20490628G>A  | RNA               | CHEK2P2  |          | checkpoint kinase 2 pse168 (0.01)   | 87 (0.86)  | 2.30 |
| 12-03 | Gp4 Focus 1 | g.chr12:102108351C>T | Missense Mutation | CHPT1    | p.S164F  | choline phosphotransfer 60 (0.02)   | 32 (0.53)  | 1.42 |
| 12-03 | Gp4 Focus 1 | g.chr12:102108364G>T | Missense Mutation | CHPT1    | p.M168I  | choline phosphotransfer 61 (0.00)   | 33 (0.55)  | 1.45 |
| 12-03 | Gp4 Focus 1 | g.chr2:101023073C>A  | Missense Mutation | CHST10   | p.S22I   | carbohydrate sulfotransf 36 (0.00)  | 16 (0.44)  | 1.17 |
| 12-03 | Gp4 Focus 1 | g.chr16:75563275C>A  | Missense Mutation | CHST5    | p.K336N  | carbohydrate (N-acetylgl 15 (0.00)  | 148 (0.15) | 0.40 |
| 12-03 | Gp4 Focus 1 | g.chr19:42793042T>A  | Missense Mutation | CIC      | p.S1221T | capicua transcriptional r 15 (0.00) | 78 (0.22)  | 0.58 |
| 12-03 | Gp4 Focus 1 | g.chr2:122125391C>A  | Missense Mutation | CLASP1   | p.G1153V | cytoplasmic linker assoc 63 (0.00)  | 127 (0.16) | 0.42 |
| 12-03 | Gp4 Focus 1 | g.chr1:11897448C>T   | Silent            | CLCN6    | p.D729D  | chloride channel, voltag 30 (0.00)  | 112 (0.45) | 1.19 |
| 12-03 | Gp4 Focus 1 | g.chr15:65450140G>T  | Missense Mutation | CLPX     | p.S334Y  | caseinolytic mitochondr 43 (0.00)   | 41 (0.46)  | 1.24 |
| 12-03 | Gp4 Focus 1 | g.chr17:57744250G>A  | Silent            | CLTC     | p.Q680Q  | clathrin, heavy chain (H 17 (0.00)  | 22 (0.32)  | 1.13 |
| 12-03 | Gp4 Focus 1 | g.chr22:19188971C>A  | Nonsense Mutation | CLTCL1   | p.E1212* | clathrin, heavy chain-lik 46 (0.00) | 138 (0.20) | 0.69 |
| 12-03 | Gp4 Focus 1 | g.chr10:104831549G>C | Missense Mutation | CNNM2    | p.R729P  | cyclin and CBS domain 21 (0.00)     | 70 (0.19)  | 0.50 |
| 12-03 | Gp4 Focus 1 | g.chr10:104836785C>T | Nonsense Mutation | CNNM2    | p.Q826*  | cyclin and CBS domain 62 (0.00)     | 129 (0.31) | 0.83 |
| 12-03 | Gp4 Focus 1 | g.chr5:179994905C>T  | Missense Mutation | CNOT6    | p.S310F  | CCR4-NOT transcriptio 26 (0.00)     | 49 (0.24)  | 0.65 |
| 12-03 | Gp4 Focus 1 | g.chr4:78652577C>A   | Missense Mutation | CNOT6L   | p.V330L  | CCR4-NOT transcriptio 45 (0.00)     | 42 (0.48)  | 1.27 |

|       |             |                     |                   |             |          |                             |            |            |      |
|-------|-------------|---------------------|-------------------|-------------|----------|-----------------------------|------------|------------|------|
| 12-03 | Gp4 Focus 1 | g.chr12:41419113G>A | Missense Mutation | CNTN1       | p.M895I  | contactin 1                 | 64 (0.02)  | 209 (0.38) | 1.01 |
| 12-03 | Gp4 Focus 1 | g.chr11:99932034G>C | Silent            | CNTN5       | p.P357P  | contactin 5                 | 63 (0.00)  | 9 (0.89)   | 2.37 |
| 12-03 | Gp4 Focus 1 | g.chr3:1363333G>A   | Splice Site       | CNTN6       |          | contactin 6                 | 40 (0.00)  | 15 (0.33)  | 0.89 |
| 12-03 | Gp4 Focus 1 | g.chr16:76528814C>A | Silent            | CNTNAP4     | p.T699T  | contactin associated pro 36 | (0.00)     | 21 (0.29)  | 0.76 |
| 12-03 | Gp4 Focus 1 | g.chr16:76587188G>A | Missense Mutation | CNTNAP4     | p.D1154N | contactin associated pro 66 | (0.00)     | 28 (0.43)  | 1.14 |
| 12-03 | Gp4 Focus 1 | g.chr2:125555867G>A | Missense Mutation | CNTNAP5     | p.D1062N | contactin associated pro 34 | (0.00)     | 46 (0.65)  | 1.74 |
| 12-03 | Gp4 Focus 1 | g.chr2:125555879G>A | Missense Mutation | CNTNAP5     | p.V1066I | contactin associated pro 34 | (0.00)     | 41 (0.66)  | 1.76 |
| 12-03 | Gp4 Focus 1 | g.chr17:7836560C>A  | Missense Mutation | CNTROB      | p.Q55K   | centrobin, centrosomal I45  | (0.00)     | 69 (0.26)  | 0.70 |
| 12-03 | Gp4 Focus 1 | g.chr7:51097190C>A  | Missense Mutation | COBL        | p.D535Y  | cordons-bleu WH2 repea      | 29 (0.00)  | 30 (0.17)  | 0.44 |
| 12-03 | Gp4 Focus 1 | g.chr17:48264051G>T | Missense Mutation | COL1A1      | p.P1255H | collagen, type I, alpha 1   | 26 (0.00)  | 62 (0.77)  | 2.06 |
| 12-03 | Gp4 Focus 1 | g.chr8:139749787G>A | Missense Mutation | COL22A1     | p.P707S  | collagen, type XXII, alp    | 28 (0.00)  | 27 (0.74)  | 1.98 |
| 12-03 | Gp4 Focus 1 | g.chr8:139820045C>A | Missense Mutation | COL22A1     | p.G487V  | collagen, type XXII, alp    | 29 (0.00)  | 17 (0.35)  | 0.94 |
| 12-03 | Gp4 Focus 1 | g.chr2:228012192G>A | Missense Mutation | COL4A4      | p.S3F    | collagen, type IV, alpha    | 42 (0.00)  | 26 (0.19)  | 0.51 |
| 12-03 | Gp4 Focus 1 | g.chr19:10078737C>T | Missense Mutation | COL5A3      | p.G1445S | collagen, type V, alpha     | 30 (0.00)  | 16 (0.94)  | 3.32 |
| 12-03 | Gp4 Focus 1 | g.chr2:238265999A>G | Silent            | COL6A3      | p.P2191P | collagen, type VI, alpha    | 87 (0.00)  | 137 (0.31) | 0.84 |
| 12-03 | Gp4 Focus 1 | g.chr2:238266029G>C | Silent            | COL6A3      | p.V2181V | collagen, type VI, alpha    | 33 (0.00)  | 122 (0.54) | 1.44 |
| 12-03 | Gp4 Focus 1 | g.chr3:130289888C>A | Silent            | COL6A6      | p.L876L  | collagen, type VI, alpha    | 140 (0.01) | 14 (0.43)  | 1.14 |
| 12-03 | Gp4 Focus 1 | g.chr4:8608508G>T   | Missense Mutation | CPZ         | p.Q306H  | carboxypeptidase Z          | 37 (0.00)  | 47 (0.21)  | 0.57 |
| 12-03 | Gp4 Focus 1 | g.chr1:207867792C>A | Missense Mutation | CR1L        | p.H186Q  | complement component 107    | (0.00)     | 13 (0.38)  | 1.03 |
| 12-03 | Gp4 Focus 1 | g.chr1:207867826G>A | Missense Mutation | CR1L        | p.E198K  | complement component 97     | (0.00)     | 16 (0.38)  | 1.00 |
| 12-03 | Gp4 Focus 1 | g.chr17:1326921C>T  | Silent            | CRK         | p.T267T  | v-crk avian sarcoma vir     | 22 (0.00)  | 27 (0.22)  | 0.59 |
| 12-03 | Gp4 Focus 1 | g.chr1:16958870G>T  | lincRNA           | CROCCP2     |          | ciliary rootlet coiled-coi  | 58 (0.00)  | 170 (0.16) | 0.42 |
| 12-03 | Gp4 Focus 1 | g.chr5:131409781C>G | Missense Mutation | CSF2        | p.T56R   | colony stimulating facto    | 19 (0.00)  | 112 (0.18) | 0.48 |
| 12-03 | Gp4 Focus 1 | g.chr17:80209349G>T | Missense Mutation | CSNK1D      | p.P264H  | casein kinase 1, delta      | 17 (0.00)  | 39 (0.31)  | 1.08 |
| 12-03 | Gp4 Focus 1 | g.chr8:68102933C>T  | Missense Mutation | CSPP1       | p.P1085L | centrosome and spindle      | 23 (0.00)  | 16 (0.50)  | 1.33 |
| 12-03 | Gp4 Focus 1 | g.chr21:45194562C>T | Missense Mutation | CSTB        | p.A49T   | cystatin B (stefin B)       | 22 (0.00)  | 31 (0.16)  | 0.61 |
| 12-03 | Gp4 Focus 1 | g.chr17:34292222C>A | RNA               | CTB-186H2.2 |          |                             | 41 (0.00)  | 44 (0.86)  | 2.30 |
| 12-03 | Gp4 Focus 1 | g.chr17:3558346G>A  | Missense Mutation | CTNS        | p.V94I   | cystinosis, lysosomal cy    | 20 (0.00)  | 55 (0.15)  | 0.39 |
| 12-03 | Gp4 Focus 1 | g.chr1:112998924A>T | Missense Mutation | CTTNBP2NL   | p.L270F  | CTTNBP2 N-terminal li       | 36 (0.00)  | 49 (0.16)  | 0.44 |
| 12-03 | Gp4 Focus 1 | g.chr1:112998925A>T | Nonsense Mutation | CTTNBP2NL   | p.K271*  | CTTNBP2 N-terminal li       | 36 (0.00)  | 49 (0.16)  | 0.44 |
| 12-03 | Gp4 Focus 1 | g.chr4:105412001C>A | Missense Mutation | CXXC4       | p.C320F  | CXXC finger protein 4       | 93 (0.00)  | 96 (0.25)  | 0.67 |
| 12-03 | Gp4 Focus 1 | g.chr1:47610043C>T  | Silent            | CYP4A22     | p.L269L  | cytochrome P450, famil      | 74 (0.00)  | 28 (0.93)  | 2.48 |
| 12-03 | Gp4 Focus 1 | g.chr9:124408153G>A | Intron            | DAB2IP      |          | DAB2 interacting protei     | 53 (0.00)  | 16 (0.94)  | 0.62 |
| 12-03 | Gp4 Focus 1 | g.chr9:124422733G>A | Intron            | DAB2IP      |          | DAB2 interacting protei     | 37 (0.00)  | 26 (0.73)  | 0.49 |
| 12-03 | Gp4 Focus 1 | g.chr9:124434271G>T | Intron            | DAB2IP      |          | DAB2 interacting protei     | 29 (0.00)  | 66 (0.58)  | 0.38 |

|       |             |                      |                   |         |          |                          |            |            |      |
|-------|-------------|----------------------|-------------------|---------|----------|--------------------------|------------|------------|------|
| 12-03 | Gp4 Focus 1 | g.chr14:69521328C>A  | Missense Mutation | DCAF5   | p.G692V  | DDB1 and CUL4 associ     | 54 (0.00)  | 19 (0.32)  | 0.84 |
| 12-03 | Gp4 Focus 1 | g.chr11:6647863G>A   | Missense Mutation | DCHS1   | p.A2095V | dachsous cadherin-relat  | 21 (0.00)  | 53 (0.25)  | 0.49 |
| 12-03 | Gp4 Focus 1 | g.chr4:155254449C>T  | Missense Mutation | DCHS2   | p.D472N  | dachsous cadherin-relat  | 18 (0.00)  | 16 (0.38)  | 1.00 |
| 12-03 | Gp4 Focus 1 | g.chr13:95121290G>T  | Missense Mutation | DCT     | p.A102D  | dopachrome tautomerase   | 46 (0.00)  | 54 (0.91)  | 1.35 |
| 12-03 | Gp4 Focus 1 | g.chr2:74597751T>C   | Missense Mutation | DCTN1   | p.K349E  | dynactin 1               | 26 (0.00)  | 56 (0.38)  | 1.00 |
| 12-03 | Gp4 Focus 1 | g.chr13:114112385C>A | Missense Mutation | DCUN1D2 | p.A247S  | DCN1, defective in culli | 77 (0.00)  | 206 (0.14) | 0.38 |
| 12-03 | Gp4 Focus 1 | g.chr4:101108898C>A  | Missense Mutation | DDIT4L  | p.G173V  | DNA-damage-inducible     | 48 (0.00)  | 13 (0.69)  | 1.85 |
| 12-03 | Gp4 Focus 1 | g.chr12:31236927G>T  | Nonsense Mutation | DDX11   | p.G109*  | DEAD/H (Asp-Glu-Ala-     | 16 (0.06)  | 30 (0.27)  | 0.71 |
| 12-03 | Gp4 Focus 1 | g.chr1:112303725G>A  | Missense Mutation | DDX20   | p.V314I  | DEAD (Asp-Glu-Ala-A      | 21 (0.00)  | 17 (0.29)  | 0.78 |
| 12-03 | Gp4 Focus 1 | g.chr5:134120150G>T  | Nonsense Mutation | DDX46   | p.G421*  | DEAD (Asp-Glu-Ala-A      | 58 (0.00)  | 46 (0.35)  | 0.93 |
| 12-03 | Gp4 Focus 1 | g.chr8:142176361G>T  | Silent            | DENND3  | p.L542L  | DENN/MADD domain         | 31 (0.00)  | 97 (0.38)  | 1.02 |
| 12-03 | Gp4 Focus 1 | g.chr9:19300235C>A   | Missense Mutation | DENND4C | p.A406E  | DENN/MADD domain         | 23 (0.00)  | 14 (0.64)  | 1.71 |
| 12-03 | Gp4 Focus 1 | g.chr1:68947917A>G   | Missense Mutation | DEPDC1  | p.I525T  | DEP domain containing    | 55 (0.00)  | 99 (0.20)  | 0.54 |
| 12-03 | Gp4 Focus 1 | g.chr22:19050790A>G  | Splice Site       | DGCR2   | p.L184L  | DiGeorge syndrome crit   | 16 (0.00)  | 19 (0.26)  | 0.89 |
| 12-03 | Gp4 Focus 1 | g.chr19:12790981G>A  | Silent            | DHPS    | p.H122H  | deoxyhypusine synthase   | 104 (0.00) | 121 (0.56) | 1.99 |
| 12-03 | Gp4 Focus 1 | g.chr19:12791003G>A  | Missense Mutation | DHPS    | p.T115I  | deoxyhypusine synthase   | 100 (0.00) | 113 (0.58) | 2.04 |
| 12-03 | Gp4 Focus 1 | g.chr14:24424349G>T  | Silent            | DHRS4   | p.G78G   | dehydrogenase/reductas   | 20 (0.00)  | 143 (0.22) | 0.43 |
| 12-03 | Gp4 Focus 1 | g.chr1:182841587G>A  | Missense Mutation | DHX9    | p.C558Y  | DEAH (Asp-Glu-Ala-H      | 50 (0.00)  | 27 (0.26)  | 0.69 |
| 12-03 | Gp4 Focus 1 | g.chr10:54075458C>T  | Intron            | DKK1    |          | dickkopf WNT signalin    | 60 (0.00)  | 107 (0.31) | 0.82 |
| 12-03 | Gp4 Focus 1 | g.chr3:38153780C>T   | Silent            | DLEC1   | p.Y1198Y | deleted in lung and esop | 61 (0.00)  | 79 (0.25)  | 0.41 |
| 12-03 | Gp4 Focus 1 | g.chr10:124377594G>A | Silent            | DMBT1   | p.V1522V | deleted in malignant bra | 262 (0.00) | 20 (0.40)  | 1.07 |
| 12-03 | Gp4 Focus 1 | g.chr17:7701021G>A   | Missense Mutation | DNAH2   | p.V2702M | dynein, axonemal, heav   | 17 (0.00)  | 15 (0.60)  | 1.60 |
| 12-03 | Gp4 Focus 1 | g.chr16:21132173C>A  | Silent            | DNAH3   | p.L529L  | dynein, axonemal, heav   | 98 (0.00)  | 64 (0.89)  | 2.38 |
| 12-03 | Gp4 Focus 1 | g.chr22:41257419C>T  | Missense Mutation | DNAJB7  | p.V194I  | DnaJ (Hsp40) homolog,    | 25 (0.00)  | 36 (0.17)  | 0.56 |
| 12-03 | Gp4 Focus 1 | g.chr15:41068474T>C  | Missense Mutation | DNAJC17 | p.E133G  | DnaJ (Hsp40) homolog,    | 16 (0.00)  | 26 (0.27)  | 0.72 |
| 12-03 | Gp4 Focus 1 | g.chr11:6591252C>T   | Silent            | DNHD1   | p.L4293L | dynein heavy chain dom   | 22 (0.00)  | 47 (0.36)  | 0.96 |
| 12-03 | Gp4 Focus 1 | g.chr9:131012393G>T  | Splice Site       | DNM1    |          | dynamamin 1              | 23 (0.00)  | 253 (0.15) | 0.41 |
| 12-03 | Gp4 Focus 1 | g.chr10:128798486G>A | Silent            | DOCK1   | p.Q300Q  | dedicator of cytokines   | 53 (0.00)  | 73 (0.18)  | 0.47 |
| 12-03 | Gp4 Focus 1 | g.chr2:225637885C>A  | Missense Mutation | DOCK10  | p.V2065F | dedicator of cytokines   | 30 (0.00)  | 34 (0.74)  | 1.96 |
| 12-03 | Gp4 Focus 1 | g.chr2:225710285G>A  | Silent            | DOCK10  | p.D770D  | dedicator of cytokines   | 72 (0.00)  | 28 (0.29)  | 0.76 |
| 12-03 | Gp4 Focus 1 | g.chr1:63008323G>A   | Missense Mutation | DOCK7   | p.R970W  | dedicator of cytokines   | 25 (0.00)  | 15 (0.47)  | 1.24 |
| 12-03 | Gp4 Focus 1 | g.chr1:63100516G>A   | Silent            | DOCK7   | p.A321A  | dedicator of cytokines   | 15 (0.00)  | 23 (0.22)  | 0.58 |
| 12-03 | Gp4 Focus 1 | g.chr6:7580524G>A    | Silent            | DSP     | p.E1367E | desmoplakin              | 49 (0.00)  | 13 (0.38)  | 1.03 |
| 12-03 | Gp4 Focus 1 | g.chr6:56334985G>C   | Missense Mutation | DST     | p.L7153V | dystonin                 | 84 (0.00)  | 18 (0.44)  | 0.88 |
| 12-03 | Gp4 Focus 1 | g.chr6:56382052T>A   | Nonsense Mutation | DST     | p.K5781* | dystonin                 | 29 (0.00)  | 23 (0.43)  | 0.86 |

|       |             |                      |                   |         |          |                               |            |            |      |
|-------|-------------|----------------------|-------------------|---------|----------|-------------------------------|------------|------------|------|
| 12-03 | Gp4 Focus 1 | g.chr15:45448008G>A  | Missense Mutation | DUOX1   | p.G1195R | dual oxidase 1                | 81 (0.00)  | 13 (0.92)  | 2.46 |
| 12-03 | Gp4 Focus 1 | g.chr15:45457018G>A  | Missense Mutation | DUOX1   | p.M1525I | dual oxidase 1                | 27 (0.00)  | 50 (0.50)  | 1.33 |
| 12-03 | Gp4 Focus 1 | g.chr15:45397870C>A  | Nonsense Mutation | DUOX2   | p.E769*  | dual oxidase 2                | 52 (0.00)  | 62 (0.21)  | 0.56 |
| 12-03 | Gp4 Focus 1 | g.chr11:103339377C>A | Missense Mutation | DYNC2H1 | p.L4237I | dynein, cytoplasmic 2, h139   | (0.01)     | 28 (0.18)  | 0.48 |
| 12-03 | Gp4 Focus 1 | g.chr21:38877851C>T  | Missense Mutation | DYRK1A  | p.S502F  | dual-specificity tyrosine 36  | (0.00)     | 25 (0.68)  | 1.81 |
| 12-03 | Gp4 Focus 1 | g.chr2:71778223C>A   | Silent            | DYSF    | p.L543L  | dysferlin                     | 60 (0.00)  | 116 (0.18) | 0.48 |
| 12-03 | Gp4 Focus 1 | g.chr11:65636079G>A  | Missense Mutation | EFEMP2  | p.S250F  | EGF containing fibulin-23     | (0.00)     | 137 (0.20) | 0.68 |
| 12-03 | Gp4 Focus 1 | g.chr8:132996459T>A  | Missense Mutation | EFR3A   | p.L550Q  | EFR3 homolog A (S. ce 22)     | (0.00)     | 34 (0.50)  | 1.33 |
| 12-03 | Gp4 Focus 1 | g.chr15:40282545T>C  | Silent            | EIF2AK4 | p.D866D  | eukaryotic translation in 23  | (0.00)     | 24 (0.25)  | 0.67 |
| 12-03 | Gp4 Focus 1 | g.chr12:10658875G>A  | Missense Mutation | EIF2S3L | p.R125K  |                               | 107 (0.00) | 98 (0.28)  | 0.73 |
| 12-03 | Gp4 Focus 1 | g.chr17:78117976G>T  | Silent            | EIF4A3  | p.I79I   | eukaryotic translation in 45  | (0.00)     | 43 (0.12)  | 0.41 |
| 12-03 | Gp4 Focus 1 | g.chr13:41507692G>A  | Missense Mutation | ELF1    | p.H577Y  | E74-like factor 1 (ets do 47) | (0.00)     | 34 (0.50)  | 0.65 |
| 12-03 | Gp4 Focus 1 | g.chr14:89109332C>A  | Missense Mutation | EML5    | p.G1381V | echinoderm microtubule 45     | (0.00)     | 35 (0.31)  | 0.84 |
| 12-03 | Gp4 Focus 1 | g.chr19:6904129C>A   | Silent            | EMR1    | p.G295G  | egf-like module containi      | 27 (0.00)  | 39 (0.36)  | 1.37 |
| 12-03 | Gp4 Focus 1 | g.chr8:120606044C>A  | Silent            | ENPP2   | p.L395L  | ectonucleotide pyrophos       | 38 (0.00)  | 44 (0.48)  | 1.27 |
| 12-03 | Gp4 Focus 1 | g.chr22:41569780C>A  | Missense Mutation | EP300   | p.H1591N | E1A binding protein p3(25)    | (0.00)     | 60 (0.37)  | 1.23 |
| 12-03 | Gp4 Focus 1 | g.chr12:132502860G>A | Missense Mutation | EP400   | p.E1406K | E1A binding protein p4(22)    | (0.00)     | 28 (0.25)  | 0.67 |
| 12-03 | Gp4 Focus 1 | g.chr7:100411302G>A  | Silent            | EPHB4   | p.D576D  | EPH receptor B4               | 35 (0.00)  | 25 (0.76)  | 2.03 |
| 12-03 | Gp4 Focus 1 | g.chr16:14021961A>G  | Missense Mutation | ERCC4   | p.T221A  | excision repair cross-co      | 50 (0.00)  | 17 (0.29)  | 0.62 |
| 12-03 | Gp4 Focus 1 | g.chr21:39756338G>A  | Intron            | ERG     |          | v-ets avian erythroblastc     | 53 (0.00)  | 60 (0.35)  | 0.93 |
| 12-03 | Gp4 Focus 1 | g.chr21:39770177G>A  | Intron            | ERG     |          | v-ets avian erythroblastc     | 156 (0.00) | 27 (0.33)  | 0.89 |
| 12-03 | Gp4 Focus 1 | g.chr21:39806293C>T  | Intron            | ERG     |          | v-ets avian erythroblastc     | 92 (0.00)  | 44 (0.16)  | 0.42 |
| 12-03 | Gp4 Focus 1 | g.chr21:39813879G>T  | Intron            | ERG     |          | v-ets avian erythroblastc     | 52 (0.00)  | 33 (0.39)  | 1.05 |
| 12-03 | Gp4 Focus 1 | g.chr21:39834713G>T  | Intron            | ERG     |          | v-ets avian erythroblastc     | 43 (0.00)  | 47 (0.15)  | 0.40 |
| 12-03 | Gp4 Focus 1 | g.chr21:39863587C>T  | Intron            | ERG     |          | v-ets avian erythroblastc     | 73 (0.00)  | 25 (0.28)  | 0.75 |
| 12-03 | Gp4 Focus 1 | g.chr21:39867733G>A  | Intron            | ERG     |          | v-ets avian erythroblastc     | 22 (0.00)  | 34 (0.82)  | 2.20 |
| 12-03 | Gp4 Focus 1 | g.chr21:39998480A>G  | Intron            | ERG     |          | v-ets avian erythroblastc     | 17 (0.00)  | 24 (0.42)  | 1.11 |
| 12-03 | Gp4 Focus 1 | g.chr21:40008305G>A  | Intron            | ERG     |          | v-ets avian erythroblastc     | 93 (0.00)  | 49 (0.20)  | 0.54 |
| 12-03 | Gp4 Focus 1 | g.chr21:40008408G>A  | Intron            | ERG     |          | v-ets avian erythroblastc     | 73 (0.00)  | 37 (0.24)  | 0.65 |
| 12-03 | Gp4 Focus 1 | g.chr12:53664539G>T  | Missense Mutation | ESPL1   | p.E442D  | extra spindle pole bodie      | 33 (0.00)  | 37 (0.24)  | 0.65 |
| 12-03 | Gp4 Focus 1 | g.chr12:56531994G>A  | Missense Mutation | ESYT1   | p.G769S  | extended synaptotagmin        | 41 (0.00)  | 18 (0.61)  | 1.63 |
| 12-03 | Gp4 Focus 1 | g.chr4:159627967T>A  | Missense Mutation | ETFDH   | p.I505K  | electron-transferring-fla     | 51 (0.00)  | 33 (0.24)  | 0.65 |
| 12-03 | Gp4 Focus 1 | g.chr14:69695766C>T  | Silent            | EXD2    | p.L189L  | exonuclease 3'-5' domai       | 37 (0.00)  | 18 (0.28)  | 0.74 |
| 12-03 | Gp4 Focus 1 | g.chr5:453492G>T     | Missense Mutation | EXOC3   | p.E124D  | exocyst complex compo         | 26 (0.00)  | 20 (0.35)  | 0.93 |
| 12-03 | Gp4 Focus 1 | g.chr1:11147588C>T   | Missense Mutation | EXOSC10 | p.E336K  | exosome component 10          | 71 (0.00)  | 144 (0.17) | 0.46 |



|       |             |                      |                   |          |          |                           |            |            |      |
|-------|-------------|----------------------|-------------------|----------|----------|---------------------------|------------|------------|------|
| 12-03 | Gp4 Focus 1 | g.chr8:28574353G>A   | Silent            | EXTL3    | p.Q259Q  | exostosin-like glycosyltr | 54 (0.00)  | 83 (0.17)  | 0.45 |
| 12-03 | Gp4 Focus 1 | g.chr1:50941195C>T   | Missense Mutation | FAF1     | p.A604T  | Fas (TNFRSF6) associa     | 29 (0.00)  | 34 (0.26)  | 0.71 |
| 12-03 | Gp4 Focus 1 | g.chr12:50295054C>A  | Nonsense Mutation | FAIM2    | p.E24*   | Fas apoptotic inhibitory  | 36 (0.00)  | 37 (0.19)  | 0.50 |
| 12-03 | Gp4 Focus 1 | g.chr7:22999935G>A   | Nonsense Mutation | FAM126A  | p.R311*  | family with sequence si   | 48 (0.00)  | 19 (0.47)  | 1.26 |
| 12-03 | Gp4 Focus 1 | g.chr4:152499069C>T  | Silent            | FAM160A1 | p.G191G  | family with sequence si   | 48 (0.02)  | 49 (0.16)  | 0.44 |
| 12-03 | Gp4 Focus 1 | g.chr2:62067273G>A   | Missense Mutation | FAM161A  | p.A289V  | family with sequence si   | 103 (0.00) | 14 (0.36)  | 0.95 |
| 12-03 | Gp4 Focus 1 | g.chr7:135433285G>T  | Missense Mutation | FAM180A  | p.A15D   | family with sequence si   | 109 (0.00) | 99 (0.43)  | 1.16 |
| 12-03 | Gp4 Focus 1 | g.chr10:82185747C>T  | Silent            | FAM213A  | p.I132I  | family with sequence si   | 58 (0.00)  | 43 (0.16)  | 0.43 |
| 12-03 | Gp4 Focus 1 | g.chr10:120889053G>A | Missense Mutation | FAM45A   | p.E241K  | family with sequence si   | 18 (0.00)  | 26 (0.54)  | 1.44 |
| 12-03 | Gp4 Focus 1 | g.chr9:97873814C>A   | Silent            | FANCC    | p.T420T  | Fanconi anemia, comple    | 46 (0.00)  | 136 (0.21) | 0.69 |
| 12-03 | Gp4 Focus 1 | g.chr2:207655327T>C  | Missense Mutation | FASTKD2  | p.Y644H  | FAST kinase domains 2     | 88 (0.00)  | 34 (0.18)  | 0.47 |
| 12-03 | Gp4 Focus 1 | g.chr11:92087620G>T  | Missense Mutation | FAT3     | p.G631V  | FAT atypical cadherin     | 338 (0.00) | 38 (0.26)  | 0.70 |
| 12-03 | Gp4 Focus 1 | g.chr9:97382637C>T   | Missense Mutation | FBP1     | p.A103T  | fructose-1,6-bisphospha   | 30 (0.00)  | 38 (0.18)  | 0.62 |
| 12-03 | Gp4 Focus 1 | g.chr8:28340939T>G   | Missense Mutation | FBXO16   | p.N9H    | F-box protein 16          | 26 (0.00)  | 27 (0.52)  | 1.38 |
| 12-03 | Gp4 Focus 1 | g.chr5:171326957G>A  | Missense Mutation | FBXW11   | p.T161I  | F-box and WD repeat dc    | 76 (0.00)  | 59 (0.15)  | 0.41 |
| 12-03 | Gp4 Focus 1 | g.chr3:48421044C>T   | Missense Mutation | FBXW12   | p.P100L  | F-box and WD repeat dc    | 58 (0.00)  | 118 (0.75) | 2.50 |
| 12-03 | Gp4 Focus 1 | g.chr11:72600965C>A  | Missense Mutation | FCHSD2   | p.G181V  | FCH and double SH3 dc     | 24 (0.00)  | 38 (0.32)  | 1.13 |
| 12-03 | Gp4 Focus 1 | g.chr9:95780479C>A   | Missense Mutation | FGD3     | p.S446Y  | FYVE, RhoGEF and PF       | 51 (0.00)  | 42 (0.17)  | 0.56 |
| 12-03 | Gp4 Focus 1 | g.chr11:65655135G>A  | Missense Mutation | FIBP     | p.T116I  | fibroblast growth factor  | 141 (0.00) | 288 (0.19) | 0.66 |
| 12-03 | Gp4 Focus 1 | g.chr14:24601739C>A  | Missense Mutation | FITM1    | p.L196I  | fat storage-inducing trar | 15 (0.00)  | 104 (0.33) | 0.63 |
| 12-03 | Gp4 Focus 1 | g.chr1:152276956G>C  | Missense Mutation | FLG      | p.S3469C | filaggrin                 | 66 (0.00)  | 77 (0.88)  | 2.35 |
| 12-03 | Gp4 Focus 1 | g.chr1:152278970G>A  | Nonsense Mutation | FLG      | p.Q2798* | filaggrin                 | 64 (0.00)  | 130 (0.20) | 0.53 |
| 12-03 | Gp4 Focus 1 | g.chr1:152279013C>T  | Silent            | FLG      | p.Q2783Q | filaggrin                 | 63 (0.00)  | 166 (0.14) | 0.39 |
| 12-03 | Gp4 Focus 1 | g.chr1:152279701G>T  | Nonsense Mutation | FLG      | p.S2554* | filaggrin                 | 37 (0.00)  | 28 (0.61)  | 1.62 |
| 12-03 | Gp4 Focus 1 | g.chr1:152281235G>A  | Nonsense Mutation | FLG      | p.Q2043* | filaggrin                 | 24 (0.00)  | 39 (0.54)  | 1.44 |
| 12-03 | Gp4 Focus 1 | g.chr1:152282690C>A  | Missense Mutation | FLG      | p.G1558W | filaggrin                 | 90 (0.00)  | 135 (0.45) | 1.20 |
| 12-03 | Gp4 Focus 1 | g.chr1:152284551C>T  | Silent            | FLG      | p.R937R  | filaggrin                 | 25 (0.00)  | 32 (0.16)  | 0.42 |
| 12-03 | Gp4 Focus 1 | g.chr1:152285771G>T  | Missense Mutation | FLG      | p.H531N  | filaggrin                 | 102 (0.00) | 186 (0.23) | 0.60 |
| 12-03 | Gp4 Focus 1 | g.chr1:152286362T>A  | Nonsense Mutation | FLG      | p.R334*  | filaggrin                 | 81 (0.00)  | 21 (0.29)  | 0.76 |
| 12-03 | Gp4 Focus 1 | g.chr11:128680806G>A | Missense Mutation | FLI1     | p.G235R  | Fli-1 proto-oncogene, E'  | 136 (0.00) | 42 (0.14)  | 0.38 |
| 12-03 | Gp4 Focus 1 | g.chr7:128481553G>T  | Missense Mutation | FLNC     | p.D685Y  | filamin C, gamma          | 64 (0.00)  | 200 (0.17) | 0.44 |
| 12-03 | Gp4 Focus 1 | g.chr2:153471419G>T  | Missense Mutation | FMNL2    | p.D373Y  | formin-like 2             | 70 (0.00)  | 44 (0.16)  | 0.42 |
| 12-03 | Gp4 Focus 1 | g.chr1:171079979G>A  | Missense Mutation | FMO3     | p.R223Q  | flavin containing monoc   | 28 (0.00)  | 12 (0.75)  | 2.00 |
| 12-03 | Gp4 Focus 1 | g.chr9:132740819G>T  | Silent            | FNBP1    | p.I90I   | formin binding protein    | 122 (0.00) | 50 (0.20)  | 0.53 |
| 12-03 | Gp4 Focus 1 | g.chr16:86612605C>A  | Silent            | FOXL1    | p.G92G   | forkhead box L1           | 16 (0.00)  | 254 (0.12) | 0.39 |

|       |             |                      |                   |          |          |                           |            |            |      |
|-------|-------------|----------------------|-------------------|----------|----------|---------------------------|------------|------------|------|
| 12-03 | Gp4 Focus 1 | g.chr4:79455636C>A   | Missense Mutation | FRAS1    | p.N3653K | Fraser extracellular matr | 83 (0.00)  | 29 (0.62)  | 1.66 |
| 12-03 | Gp4 Focus 1 | g.chr9:14824824G>A   | Missense Mutation | FREM1    | p.T683I  | FRAS1 related extracell   | 39 (0.00)  | 22 (0.23)  | 0.61 |
| 12-03 | Gp4 Focus 1 | g.chr14:44975381C>A  | Missense Mutation | FSCB     | p.Q270H  | fibrous sheath CABYR      | 129 (0.00) | 33 (0.24)  | 0.65 |
| 12-03 | Gp4 Focus 1 | g.chr2:186665487C>A  | Nonsense Mutation | FSIP2    | p.Y3818* | fibrous sheath interacti  | 41 (0.00)  | 21 (0.43)  | 1.14 |
| 12-03 | Gp4 Focus 1 | g.chr2:84518109G>T   | RNA               | FUNDC2P2 |          | FUN14 domain containi     | 57 (0.00)  | 143 (0.31) | 0.82 |
| 12-03 | Gp4 Focus 1 | g.chr5:151176938T>A  | Missense Mutation | G3BP1    | p.S230R  | GTPase activating prote   | 28 (0.00)  | 13 (0.38)  | 1.03 |
| 12-03 | Gp4 Focus 1 | g.chrX:49355887G>T   | Nonsense Mutation | GAGE2A   | p.E57*   | G antigen 2A              | 93 (0.00)  | 67 (0.58)  | 0.74 |
| 12-03 | Gp4 Focus 1 | g.chr7:99758258G>T   | Missense Mutation | GAL3ST4  | p.Q252K  | galactose-3-O-sulfotran   | 48 (0.00)  | 84 (0.14)  | 0.38 |
| 12-03 | Gp4 Focus 1 | g.chr14:88414128G>A  | Missense Mutation | GALC     | p.P478L  | galactosylceramidase      | 23 (0.00)  | 22 (0.36)  | 0.97 |
| 12-03 | Gp4 Focus 1 | g.chr14:88414134C>G  | Missense Mutation | GALC     | p.S476T  | galactosylceramidase      | 23 (0.00)  | 21 (0.38)  | 1.02 |
| 12-03 | Gp4 Focus 1 | g.chr9:35741680G>T   | Missense Mutation | GBA2     | p.H259N  | glucosidase, beta (bile a | 103 (0.00) | 53 (0.70)  | 1.86 |
| 12-03 | Gp4 Focus 1 | g.chr4:22749311G>T   | RNA               | GBA3     |          | glucosidase, beta, acid 3 | 115 (0.00) | 19 (0.47)  | 1.26 |
| 12-03 | Gp4 Focus 1 | g.chr6:10874765G>A   | Silent            | GCM2     | p.N328N  | glial cells missing homo  | 60 (0.00)  | 27 (0.41)  | 1.09 |
| 12-03 | Gp4 Focus 1 | g.chr6:10874855G>C   | Missense Mutation | GCM2     | p.I298M  | glial cells missing homo  | 138 (0.00) | 22 (0.23)  | 0.61 |
| 12-03 | Gp4 Focus 1 | g.chr12:120602254C>G | Missense Mutation | GCN1L1   | p.W578C  | GCN1 general control o    | 19 (0.00)  | 127 (0.14) | 0.38 |
| 12-03 | Gp4 Focus 1 | g.chr12:7843151C>A   | Nonsense Mutation | GDF3     | p.G140*  | growth differentiation fa | 29 (0.00)  | 20 (0.60)  | 1.60 |
| 12-03 | Gp4 Focus 1 | g.chr11:76982220G>A  | Missense Mutation | GDPD4    | p.L119F  | glycerophosphodiester p   | 39 (0.00)  | 61 (0.26)  | 0.70 |
| 12-03 | Gp4 Focus 1 | g.chr11:76982232C>G  | Missense Mutation | GDPD4    | p.V115L  | glycerophosphodiester p   | 38 (0.00)  | 64 (0.25)  | 0.67 |
| 12-03 | Gp4 Focus 1 | g.chr11:76982245C>G  | Silent            | GDPD4    | p.L110L  | glycerophosphodiester p   | 36 (0.00)  | 65 (0.17)  | 0.45 |
| 12-03 | Gp4 Focus 1 | g.chr2:233613701C>A  | Missense Mutation | GIGYF2   | p.P59H   | GRB10 interacting GYF     | 64 (0.00)  | 47 (0.15)  | 0.40 |
| 12-03 | Gp4 Focus 1 | g.chr7:150325230C>A  | Silent            | GIMAP6   | p.V152V  | GTPase, IMAP family n     | 23 (0.00)  | 61 (0.36)  | 1.35 |
| 12-03 | Gp4 Focus 1 | g.chr1:35250424G>A   | Missense Mutation | GJB3     | p.G21R   | gap junction protein, bet | 39 (0.00)  | 115 (0.21) | 0.69 |
| 12-03 | Gp4 Focus 1 | g.chr7:99526772G>A   | Silent            | GJC3     | p.L158L  | gap junction protein, gai | 27 (0.00)  | 39 (0.15)  | 0.41 |
| 12-03 | Gp4 Focus 1 | g.chr4:80328975C>T   | Missense Mutation | GK2      | p.S127N  | glycerol kinase 2         | 55 (0.00)  | 24 (0.21)  | 0.56 |
| 12-03 | Gp4 Focus 1 | g.chr11:134243635C>A | Missense Mutation | GLB1L2   | p.L510M  | galactosidase, beta 1-lik | 52 (0.00)  | 236 (0.16) | 0.43 |
| 12-03 | Gp4 Focus 1 | g.chr11:134243637G>A | Silent            | GLB1L2   | p.L510L  | galactosidase, beta 1-lik | 52 (0.00)  | 236 (0.17) | 0.44 |
| 12-03 | Gp4 Focus 1 | g.chr3:52325877T>C   | Missense Mutation | GLYCTK   | p.I131T  | glycerate kinase          | 19 (0.00)  | 71 (0.14)  | 0.38 |
| 12-03 | Gp4 Focus 1 | g.chr6:16254845G>A   | Missense Mutation | GMPR     | p.S115N  | guanosine monophosph      | 46 (0.00)  | 15 (0.67)  | 1.78 |
| 12-03 | Gp4 Focus 1 | g.chr6:16290798G>T   | Missense Mutation | GMPR     | p.G268V  | guanosine monophosph      | 65 (0.00)  | 10 (0.60)  | 1.60 |
| 12-03 | Gp4 Focus 1 | g.chr15:30906722G>C  | Silent            | GOLGA8H  | p.V619V  | golgin A8 family, mem     | 44 (0.00)  | 82 (0.17)  | 0.46 |
| 12-03 | Gp4 Focus 1 | g.chr1:155724239G>C  | Missense Mutation | GON4L    | p.S1853C | gon-4-like (C. elegans)   | 141 (0.00) | 98 (0.36)  | 0.71 |
| 12-03 | Gp4 Focus 1 | g.chr2:171806120T>A  | Nonsense Mutation | GORASP2  | p.Y72*   | golgi reassembly stacki   | 24 (0.00)  | 24 (0.29)  | 0.78 |
| 12-03 | Gp4 Focus 1 | g.chr3:194118732A>T  | Missense Mutation | GP5      | p.F94I   | glycoprotein V (platelet  | 27 (0.00)  | 114 (0.15) | 0.40 |
| 12-03 | Gp4 Focus 1 | g.chr1:217671729A>C  | Missense Mutation | GPATCH2  | p.F392C  | G patch domain contain    | 43 (0.00)  | 101 (0.47) | 1.24 |
| 12-03 | Gp4 Focus 1 | g.chr1:27223868T>C   | Missense Mutation | GPATCH3  | p.D267G  | G patch domain contain    | 47 (0.00)  | 38 (0.18)  | 0.65 |

|       |             |                     |                   |         |          |                                  |           |            |      |
|-------|-------------|---------------------|-------------------|---------|----------|----------------------------------|-----------|------------|------|
| 12-03 | Gp4 Focus 1 | g.chr1:46099767C>A  | Splice Site       | GPBP1L1 |          | GC-rich promoter binding         | 22 (0.00) | 13 (0.38)  | 1.03 |
| 12-03 | Gp4 Focus 1 | g.chr3:154145383G>A | Missense Mutation | GPR149  | p.R366C  | G protein-coupled receptor       | 18 (0.00) | 83 (0.14)  | 0.39 |
| 12-03 | Gp4 Focus 1 | g.chr10:25885654C>T | Missense Mutation | GPR158  | p.S694F  | G protein-coupled receptor       | 15 (0.00) | 12 (0.58)  | 1.56 |
| 12-03 | Gp4 Focus 1 | g.chr1:168054913C>A | Missense Mutation | GPR161  | p.E350D  | G protein-coupled receptor       | 96 (0.00) | 185 (0.23) | 0.62 |
| 12-03 | Gp4 Focus 1 | g.chr17:36483720G>A | Missense Mutation | GPR179  | p.T191I  | G protein-coupled receptor       | 51 (0.00) | 31 (0.84)  | 2.93 |
| 12-03 | Gp4 Focus 1 | g.chr17:36484024C>A | Missense Mutation | GPR179  | p.A1810S | G protein-coupled receptor       | 83 (0.00) | 115 (0.32) | 1.12 |
| 12-03 | Gp4 Focus 1 | g.chr1:202092242G>C | Missense Mutation | GPR37L1 | p.E51Q   | G protein-coupled receptor       | 16 (0.00) | 46 (0.15)  | 0.41 |
| 12-03 | Gp4 Focus 1 | g.chr5:89931108G>A  | Splice Site       | GPR98   |          | G protein-coupled receptor       | 36 (0.00) | 28 (0.57)  | 1.52 |
| 12-03 | Gp4 Focus 1 | g.chr17:7217019C>A  | Missense Mutation | GPS2    | p.A168S  | G protein pathway suppressor     | 99 (0.00) | 35 (0.17)  | 0.46 |
| 12-03 | Gp4 Focus 1 | g.chr16:9927968C>G  | Missense Mutation | GRIN2A  | p.G591R  | glutamate receptor, ionotropic   | 55 (0.00) | 51 (0.47)  | 1.25 |
| 12-03 | Gp4 Focus 1 | g.chr12:13717335C>T | Missense Mutation | GRIN2B  | p.C946Y  | glutamate receptor, ionotropic   | 27 (0.00) | 46 (0.30)  | 0.81 |
| 12-03 | Gp4 Focus 1 | g.chr12:66838487C>T | Missense Mutation | GRIP1   | p.D470N  | glutamate receptor interacting   | 18 (0.00) | 27 (0.22)  | 0.59 |
| 12-03 | Gp4 Focus 1 | g.chr7:86394687A>G  | Missense Mutation | GRM3    | p.I76V   | glutamate receptor, metabotropic | 32 (0.00) | 22 (0.50)  | 1.33 |
| 12-03 | Gp4 Focus 1 | g.chr3:7188256G>T   | Missense Mutation | GRM7    | p.V213L  | glutamate receptor, metabotropic | 20 (0.00) | 59 (0.71)  | 1.90 |
| 12-03 | Gp4 Focus 1 | g.chr4:71698039C>A  | Missense Mutation | GRSF1   | p.V105L  | G-rich RNA sequence binding      | 44 (0.00) | 20 (0.40)  | 1.07 |
| 12-03 | Gp4 Focus 1 | g.chr1:110282087C>A | Silent            | GSTM3   | p.L51L   | glutathione S-transferase        | 58 (0.00) | 162 (0.27) | 0.71 |
| 12-03 | Gp4 Focus 1 | g.chr7:65432717C>T  | Splice Site       | GUSB    |          | glucuronidase, beta              | 33 (0.00) | 56 (0.14)  | 0.54 |
| 12-03 | Gp4 Focus 1 | g.chr6:26867283C>T  | RNA               | GUSBP2  |          | glucuronidase, beta pseudogene   | 16 (0.00) | 172 (0.22) | 0.72 |
| 12-03 | Gp4 Focus 1 | g.chr12:21721851C>A | Silent            | GYS2    | p.T257T  | glycogen synthase 2 (liver)      | 57 (0.00) | 34 (0.24)  | 0.63 |
| 12-03 | Gp4 Focus 1 | g.chr12:21721944C>T | Splice Site       | GYS2    |          | glycogen synthase 2 (liver)      | 22 (0.00) | 29 (0.45)  | 1.20 |
| 12-03 | Gp4 Focus 1 | g.chr15:89424958T>A | Splice Site       | HAPLN3  |          | hyaluronan and proteoglycan      | 24 (0.00) | 36 (0.39)  | 1.04 |
| 12-03 | Gp4 Focus 1 | g.chr7:18593249C>A  | Intron            | HDAC9   |          | histone deacetylase 9            | 23 (0.00) | 17 (0.53)  | 1.41 |
| 12-03 | Gp4 Focus 1 | g.chr7:18598347C>T  | Intron            | HDAC9   |          | histone deacetylase 9            | 32 (0.00) | 71 (0.48)  | 1.28 |
| 12-03 | Gp4 Focus 1 | g.chr7:18671041T>C  | Intron            | HDAC9   |          | histone deacetylase 9            | 36 (0.00) | 21 (0.48)  | 1.27 |
| 12-03 | Gp4 Focus 1 | g.chr7:18750234C>A  | Intron            | HDAC9   |          | histone deacetylase 9            | 58 (0.00) | 55 (0.67)  | 1.79 |
| 12-03 | Gp4 Focus 1 | g.chr7:18794308C>G  | Intron            | HDAC9   |          | histone deacetylase 9            | 16 (0.00) | 47 (0.45)  | 1.19 |
| 12-03 | Gp4 Focus 1 | g.chr7:18809306T>A  | Intron            | HDAC9   |          | histone deacetylase 9            | 19 (0.00) | 17 (0.47)  | 1.25 |
| 12-03 | Gp4 Focus 1 | g.chr7:18920810A>T  | Intron            | HDAC9   |          | histone deacetylase 9            | 90 (0.00) | 33 (0.24)  | 0.65 |
| 12-03 | Gp4 Focus 1 | g.chr7:18979385C>A  | Intron            | HDAC9   |          | histone deacetylase 9            | 21 (0.00) | 35 (0.74)  | 1.98 |
| 12-03 | Gp4 Focus 1 | g.chr15:91474538C>T | Silent            | HDDC3   | p.K169K  | HD domain containing             | 36 (0.00) | 137 (0.15) | 0.39 |
| 12-03 | Gp4 Focus 1 | g.chr2:242173294G>T | Missense Mutation | HDLBP   | p.Q1077K | high density lipoprotein         | 28 (0.00) | 31 (0.29)  | 0.77 |
| 12-03 | Gp4 Focus 1 | g.chr14:31785131C>T | Missense Mutation | HEATR5A | p.G1355R | HEAT repeat containing           | 44 (0.00) | 26 (0.58)  | 1.54 |
| 12-03 | Gp4 Focus 1 | g.chr14:31597825G>A | Silent            | HECTD1  | p.S1584S | HECT domain containing           | 33 (0.00) | 30 (0.23)  | 0.62 |
| 12-03 | Gp4 Focus 1 | g.chr12:66725034A>T | Missense Mutation | HELB    | p.Y924F  | helicase (DNA) B                 | 16 (0.00) | 12 (0.42)  | 1.11 |
| 12-03 | Gp4 Focus 1 | g.chr1:109192975A>T | Missense Mutation | HENMT1  | p.V205E  | HEN1 methyltransferase           | 15 (0.00) | 11 (0.55)  | 1.45 |

|       |             |                      |                   |             |          |                                                   |            |            |      |
|-------|-------------|----------------------|-------------------|-------------|----------|---------------------------------------------------|------------|------------|------|
| 12-03 | Gp4 Focus 1 | g.chr15:64045275C>T  | Missense Mutation | HERC1       | p.G595D  | HECT and RLD domain                               | 22 (0.00)  | 35 (0.26)  | 0.69 |
| 12-03 | Gp4 Focus 1 | g.chr15:28544659C>T  | Missense Mutation | HERC2       | p.A26T   | HECT and RLD domain                               | 56 (0.00)  | 28 (0.18)  | 0.48 |
| 12-03 | Gp4 Focus 1 | g.chr4:89311842C>A   | Missense Mutation | HERC6       | p.Q159K  | HECT and RLD domain                               | 112 (0.00) | 39 (0.23)  | 0.62 |
| 12-03 | Gp4 Focus 1 | g.chr3:42740618C>A   | Missense Mutation | HHATL       | p.W65L   | hedgehog acyltransferase                          | 50 (0.00)  | 13 (0.62)  | 1.64 |
| 12-03 | Gp4 Focus 1 | g.chr1:222717495C>T  | Missense Mutation | HHIPL2      | p.E120K  | HHIP-like 2                                       | 77 (0.00)  | 22 (0.32)  | 0.85 |
| 12-03 | Gp4 Focus 1 | g.chr16:30005829C>T  | Missense Mutation | HIRIP3      | p.G213R  | HIRA interacting protein                          | 67 (0.00)  | 46 (0.59)  | 2.02 |
| 12-03 | Gp4 Focus 1 | g.chr6:12122658A>T   | Missense Mutation | HIVEP1      | p.D877V  | human immunodeficiency                            | 40 (0.00)  | 40 (0.15)  | 0.40 |
| 12-03 | Gp4 Focus 1 | g.chr10:71158398G>T  | Missense Mutation | HK1         | p.G808V  | hexokinase 1                                      | 22 (0.00)  | 23 (0.26)  | 0.70 |
| 12-03 | Gp4 Focus 1 | g.chr1:185935017A>T  | Missense Mutation | HMCN1       | p.I728F  | hemicentin 1                                      | 19 (0.00)  | 14 (0.57)  | 1.52 |
| 12-03 | Gp4 Focus 1 | g.chr4:174254252C>T  | Silent            | HMGB2       | p.K88K   | high mobility group box                           | 86 (0.00)  | 69 (0.48)  | 1.28 |
| 12-03 | Gp4 Focus 1 | g.chr20:43048382G>A  | Missense Mutation | HNF4A       | p.R253Q  | hepatocyte nuclear factor                         | 42 (0.00)  | 41 (0.15)  | 0.39 |
| 12-03 | Gp4 Focus 1 | g.chr19:41810159C>G  | Missense Mutation | HNRNPUL1    | p.P752R  | heterogeneous nuclear ribonucleoprotein           | 42 (0.00)  | 110 (0.17) | 0.46 |
| 12-03 | Gp4 Focus 1 | g.chr1:152191859G>C  | Missense Mutation | HRNR        | p.S749C  | hornerin                                          | 56 (0.00)  | 245 (0.26) | 0.70 |
| 12-03 | Gp4 Focus 1 | g.chr16:83842296C>A  | Silent            | HSBP1       | p.L19L   | heat shock factor binding protein                 | 54 (0.00)  | 92 (0.30)  | 0.81 |
| 12-03 | Gp4 Focus 1 | g.chr5:63257006G>A   | Missense Mutation | HTR1A       | p.R181C  | 5-hydroxytryptamine (serotonin) receptor 1A       | 58 (0.00)  | 99 (0.30)  | 0.45 |
| 12-03 | Gp4 Focus 1 | g.chr6:87725250G>T   | Silent            | HTR1E       | p.V66V   | 5-hydroxytryptamine (serotonin) receptor 1E       | 44 (0.00)  | 16 (0.56)  | 0.66 |
| 12-03 | Gp4 Focus 1 | g.chr4:3131750G>T    | Nonsense Mutation | HTT         | p.E615*  | huntingtin                                        | 54 (0.00)  | 35 (0.37)  | 0.99 |
| 12-03 | Gp4 Focus 1 | g.chr7:123509039C>T  | Missense Mutation | HYAL4       | p.P238S  | hyaluronoglucosaminidase                          | 51 (0.00)  | 11 (0.45)  | 1.21 |
| 12-03 | Gp4 Focus 1 | g.chr9:95027762C>A   | Splice Site       | IARS        | p.S502I  | isoleucyl-tRNA synthetase                         | 59 (0.00)  | 36 (0.22)  | 0.74 |
| 12-03 | Gp4 Focus 1 | g.chr19:10445026C>A  | Silent            | ICAM3       | p.T417T  | intercellular adhesion molecule 3                 | 24 (0.00)  | 197 (0.12) | 0.43 |
| 12-03 | Gp4 Focus 1 | g.chr21:45656927C>G  | Missense Mutation | ICOSLG      | p.D77H   | inducible T-cell co-stimulatory molecule          | 29 (0.00)  | 71 (0.34)  | 1.29 |
| 12-03 | Gp4 Focus 1 | g.chr8:39785369C>A   | Missense Mutation | IDO1        | p.Q293K  | indoleamine 2,3-dioxygenase 1                     | 36 (0.00)  | 20 (0.30)  | 0.80 |
| 12-03 | Gp4 Focus 1 | g.chr2:27672588G>A   | Missense Mutation | IFT172      | p.A1377V | intraflagellar transport 172                      | 140 (0.00) | 12 (0.67)  | 1.78 |
| 12-03 | Gp4 Focus 1 | g.chr17:26658941G>A  | Missense Mutation | IFT20       | p.P24L   | intraflagellar transport 20                       | 15 (0.00)  | 10 (0.70)  | 1.87 |
| 12-03 | Gp4 Focus 1 | g.chr15:99456489G>A  | Silent            | IGF1R       | p.L602L  | insulin-like growth factor receptor               | 37 (0.00)  | 18 (0.39)  | 1.04 |
| 12-03 | Gp4 Focus 1 | g.chr14:106208090C>A | RNA               | IGHG1       |          | immunoglobulin heavy chain 1                      | 28 (0.00)  | 195 (0.17) | 0.45 |
| 12-03 | Gp4 Focus 1 | g.chr14:106235613G>A | RNA               | IGHG3       |          | immunoglobulin heavy chain 3                      | 25 (0.00)  | 170 (0.34) | 0.91 |
| 12-03 | Gp4 Focus 1 | g.chr15:20169986C>T  | RNA               | IGHV1OR15-9 |          | immunoglobulin heavy chain variable region 15-9   | 30 (0.00)  | 45 (0.18)  | 0.47 |
| 12-03 | Gp4 Focus 1 | g.chr14:107113965C>T | RNA               | IGHV3-64    |          | immunoglobulin heavy chain variable region 3-64   | 33 (0.00)  | 135 (0.29) | 0.77 |
| 12-03 | Gp4 Focus 1 | g.chr22:22556511G>A  | RNA               | IGLV11-55   |          | immunoglobulin lambda chain variable region 11-55 | 31 (0.00)  | 27 (0.22)  | 0.75 |
| 12-03 | Gp4 Focus 1 | g.chr10:124753940C>T | Missense Mutation | IKZF5       | p.V206I  | IKAROS family zinc finger 5                       | 63 (0.00)  | 34 (0.71)  | 1.88 |
| 12-03 | Gp4 Focus 1 | g.chr15:81592159G>A  | Missense Mutation | IL16        | p.R831Q  | interleukin 16                                    | 44 (0.00)  | 74 (0.19)  | 0.50 |
| 12-03 | Gp4 Focus 1 | g.chr3:190373908G>T  | Nonsense Mutation | IL1RAP      | p.G526*  | interleukin 1 receptor accessory 2                | 42 (0.00)  | 12 (0.75)  | 2.00 |
| 12-03 | Gp4 Focus 1 | g.chr5:55237528C>T   | Silent            | IL6ST       | p.L713L  | interleukin 6 signal transducer                   | 53 (0.00)  | 22 (0.82)  | 1.20 |
| 12-03 | Gp4 Focus 1 | g.chr1:153640086C>T  | Missense Mutation | ILF2        | p.M113I  | interleukin enhancer binding protein              | 137 (0.00) | 19 (0.74)  | 1.96 |

|       |             |                     |                   |             |          |                                    |            |            |      |
|-------|-------------|---------------------|-------------------|-------------|----------|------------------------------------|------------|------------|------|
| 12-03 | Gp4 Focus 1 | g.chr19:15227298C>A | Missense Mutation | ILVBL       | p.G408C  | ilvB (bacterial acetolact          | 28 (0.00)  | 223 (0.13) | 0.48 |
| 12-03 | Gp4 Focus 1 | g.chr2:131102245C>T | Silent            | IMP4        | p.A52A   | IMP4, U3 small nucleol             | 31 (0.00)  | 17 (0.29)  | 1.05 |
| 12-03 | Gp4 Focus 1 | g.chr3:100949923C>A | Silent            | IMPG2       | p.V1100V | interphotoreceptor matri           | 40 (0.00)  | 28 (0.25)  | 0.47 |
| 12-03 | Gp4 Focus 1 | g.chr4:142978119C>A | Intron            | INPP4B      |          | inositol polyphosphate- $\epsilon$ | 66 (0.00)  | 15 (0.47)  | 1.24 |
| 12-03 | Gp4 Focus 1 | g.chr4:143123959C>A | Intron            | INPP4B      |          | inositol polyphosphate- $\epsilon$ | 16 (0.00)  | 13 (0.77)  | 2.05 |
| 12-03 | Gp4 Focus 1 | g.chr4:143134383T>C | Intron            | INPP4B      |          | inositol polyphosphate- $\epsilon$ | 160 (0.00) | 96 (0.42)  | 1.11 |
| 12-03 | Gp4 Focus 1 | g.chr4:143160330G>A | Intron            | INPP4B      |          | inositol polyphosphate- $\epsilon$ | 47 (0.00)  | 21 (0.33)  | 0.89 |
| 12-03 | Gp4 Focus 1 | g.chr4:143277264C>A | Intron            | INPP4B      |          | inositol polyphosphate- $\epsilon$ | 25 (0.00)  | 21 (0.38)  | 1.02 |
| 12-03 | Gp4 Focus 1 | g.chr4:143293768C>A | Intron            | INPP4B      |          | inositol polyphosphate- $\epsilon$ | 132 (0.00) | 15 (0.47)  | 1.24 |
| 12-03 | Gp4 Focus 1 | g.chr4:143322271C>T | Intron            | INPP4B      |          | inositol polyphosphate- $\epsilon$ | 50 (0.02)  | 136 (0.97) | 2.59 |
| 12-03 | Gp4 Focus 1 | g.chr4:143344458G>A | Intron            | INPP4B      |          | inositol polyphosphate- $\epsilon$ | 57 (0.00)  | 28 (0.79)  | 2.10 |
| 12-03 | Gp4 Focus 1 | g.chr4:143393538C>T | Intron            | INPP4B      |          | inositol polyphosphate- $\epsilon$ | 70 (0.00)  | 15 (0.47)  | 1.24 |
| 12-03 | Gp4 Focus 1 | g.chr4:143501079G>A | Intron            | INPP4B      |          | inositol polyphosphate- $\epsilon$ | 30 (0.00)  | 19 (0.53)  | 1.40 |
| 12-03 | Gp4 Focus 1 | g.chr4:143639464C>T | Intron            | INPP4B      |          | inositol polyphosphate- $\epsilon$ | 67 (0.00)  | 16 (0.50)  | 1.33 |
| 12-03 | Gp4 Focus 1 | g.chr4:143705235G>T | Intron            | INPP4B      |          | inositol polyphosphate- $\epsilon$ | 44 (0.00)  | 19 (0.58)  | 1.54 |
| 12-03 | Gp4 Focus 1 | g.chr4:143733226C>T | Intron            | INPP4B      |          | inositol polyphosphate- $\epsilon$ | 44 (0.00)  | 35 (0.63)  | 1.68 |
| 12-03 | Gp4 Focus 1 | g.chr8:19688022G>A  | Missense Mutation | INTS10      | p.A416T  | integrator complex subu            | 31 (0.00)  | 12 (0.42)  | 1.11 |
| 12-03 | Gp4 Focus 1 | g.chr9:103055230G>A | Silent            | INVS        | p.E897E  | inversin                           | 17 (0.00)  | 27 (0.63)  | 1.68 |
| 12-03 | Gp4 Focus 1 | g.chr1:201845101T>A | Missense Mutation | IPO9        | p.F1015L | importin 9                         | 24 (0.00)  | 21 (0.33)  | 0.89 |
| 12-03 | Gp4 Focus 1 | g.chr1:32672130C>T  | Silent            | IQCC        | p.T69T   | IQ motif containing C              | 42 (0.00)  | 48 (0.31)  | 0.83 |
| 12-03 | Gp4 Focus 1 | g.chr7:2629540G>A   | Splice Site       | IQCE        |          | IQ motif containing E              | 24 (0.00)  | 193 (0.16) | 0.59 |
| 12-03 | Gp4 Focus 1 | g.chr3:51937085C>T  | Silent            | IQCF1       | p.K8K    | IQ motif containing F1             | 49 (0.02)  | 18 (0.83)  | 2.22 |
| 12-03 | Gp4 Focus 1 | g.chr3:159605525G>A | Missense Mutation | IQCJ-SCHIP1 | p.R302K  | IQCJ-SCHIP1 readthrou              | 17 (0.00)  | 41 (0.54)  | 1.43 |
| 12-03 | Gp4 Focus 1 | g.chr3:12978055C>A  | Missense Mutation | IQSEC1      | p.R168L  | IQ motif and Sec7 domæ             | 24 (0.00)  | 91 (0.14)  | 0.38 |
| 12-03 | Gp4 Focus 1 | g.chr15:74467808G>A | Silent            | ISLR        | p.P203P  | immunoglobulin superfa             | 16 (0.00)  | 101 (0.46) | 0.70 |
| 12-03 | Gp4 Focus 1 | g.chr2:182358067C>G | Missense Mutation | ITGA4       | p.A390G  | integrin, alpha 4 (antige          | 26 (0.00)  | 17 (0.65)  | 1.73 |
| 12-03 | Gp4 Focus 1 | g.chr17:3632827C>A  | Missense Mutation | ITGAE       | p.A953S  | integrin, alpha E (antige          | 74 (0.00)  | 41 (0.39)  | 1.04 |
| 12-03 | Gp4 Focus 1 | g.chr3:4703770G>A   | Missense Mutation | ITPR1       | p.G404D  | inositol 1,4,5-trisphosph          | 34 (0.00)  | 15 (0.73)  | 1.96 |
| 12-03 | Gp4 Focus 1 | g.chr12:26834927G>A | Missense Mutation | ITPR2       | p.A430V  | inositol 1,4,5-trisphosph          | 49 (0.00)  | 18 (0.50)  | 1.33 |
| 12-03 | Gp4 Focus 1 | g.chr17:39919444T>A | Missense Mutation | JUP         | p.T430S  | junction plakoglobin               | 33 (0.00)  | 141 (0.14) | 0.50 |
| 12-03 | Gp4 Focus 1 | g.chr1:62739133G>A  | Missense Mutation | KANK4       | p.P548L  | KN motif and ankyrin rç            | 20 (0.00)  | 178 (0.24) | 0.64 |
| 12-03 | Gp4 Focus 1 | g.chr2:210908705C>G | Missense Mutation | KANSL1L     | p.E627Q  | KAT8 regulatory NSL c              | 15 (0.00)  | 21 (0.52)  | 1.40 |
| 12-03 | Gp4 Focus 1 | g.chr12:5021316G>A  | Missense Mutation | KCNA1       | p.D258N  | potassium voltage-gated            | 75 (0.01)  | 135 (0.19) | 0.49 |
| 12-03 | Gp4 Focus 1 | g.chr12:5021732T>C  | Silent            | KCNA1       | p.G396G  | potassium voltage-gated            | 144 (0.00) | 23 (0.65)  | 1.74 |
| 12-03 | Gp4 Focus 1 | g.chr3:156175287C>T | Missense Mutation | KCNAB1      | p.L117F  | potassium voltage-gated            | 16 (0.00)  | 42 (0.98)  | 2.60 |

|       |             |                     |                   |           |          |                            |      |      |        |        |      |
|-------|-------------|---------------------|-------------------|-----------|----------|----------------------------|------|------|--------|--------|------|
| 12-03 | Gp4 Focus 1 | g.chr12:49937847G>A | Missense Mutation | KCNH3     | p.V325I  | potassium voltage-gated 16 | 0.00 | 31   | (0.16) | 0.43   |      |
| 12-03 | Gp4 Focus 1 | g.chr17:68172233C>T | Silent            | KCNJ2     | p.P351P  | potassium inwardly-rect    | 67   | 0.00 | 21     | (0.90) | 2.41 |
| 12-03 | Gp4 Focus 1 | g.chr6:39271757C>G  | Missense Mutation | KCNK17    | p.V222L  | potassium channel, subf    | 33   | 0.00 | 290    | (0.18) | 0.49 |
| 12-03 | Gp4 Focus 1 | g.chr20:62073854G>A | Missense Mutation | KCNQ2     | p.L241F  | potassium voltage-gated    | 43   | 0.00 | 493    | (0.16) | 0.44 |
| 12-03 | Gp4 Focus 1 | g.chr7:128530321C>G | RNA               | KCP       |          | kielin/chordin-like prote  | 22   | 0.00 | 43     | (0.35) | 0.93 |
| 12-03 | Gp4 Focus 1 | g.chr22:37455385C>A | Silent            | KCTD17    | p.G180G  | potassium channel tetra    | 25   | 0.00 | 222    | (0.14) | 0.47 |
| 12-03 | Gp4 Focus 1 | g.chr11:94731479G>A | Missense Mutation | KDM4D     | p.A315T  | lysine (K)-specific dem    | 19   | 0.00 | 36     | (0.28) | 0.74 |
| 12-03 | Gp4 Focus 1 | g.chr4:55971030C>A  | Missense Mutation | KDR       | p.Q589H  | kinase insert domain rec   | 46   | 0.00 | 56     | (0.23) | 0.62 |
| 12-03 | Gp4 Focus 1 | g.chr14:24900756G>T | Missense Mutation | KHNYN     | p.G97C   | KH and NYN domain c        | 41   | 0.00 | 186    | (0.20) | 0.53 |
| 12-03 | Gp4 Focus 1 | g.chr17:26950898G>T | Silent            | KIAA0100  | p.A1613A | KIAA0100                   | 85   | 0.00 | 25     | (0.24) | 0.64 |
| 12-03 | Gp4 Focus 1 | g.chr15:64673232C>A | Missense Mutation | KIAA0101  | p.A18S   | KIAA0101                   | 33   | 0.00 | 83     | (0.27) | 0.71 |
| 12-03 | Gp4 Focus 1 | g.chr6:24576729C>A  | Missense Mutation | KIAA0319  | p.G534V  | KIAA0319                   | 56   | 0.00 | 150    | (0.18) | 0.48 |
| 12-03 | Gp4 Focus 1 | g.chr19:34791840G>A | Silent            | KIAA0355  | p.T154T  | KIAA0355                   | 50   | 0.00 | 38     | (0.21) | 0.77 |
| 12-03 | Gp4 Focus 1 | g.chr4:123274126C>T | Silent            | KIAA1109  | p.S4639S | KIAA1109                   | 55   | 0.00 | 56     | (0.29) | 0.76 |
| 12-03 | Gp4 Focus 1 | g.chr15:81214425G>A | Missense Mutation | KIAA1199  | p.E717K  |                            | 66   | 0.00 | 12     | (0.92) | 2.44 |
| 12-03 | Gp4 Focus 1 | g.chr9:5763412T>C   | Silent            | KIAA1432  | p.T795T  |                            | 84   | 0.00 | 60     | (0.22) | 0.58 |
| 12-03 | Gp4 Focus 1 | g.chr10:30316246G>T | Missense Mutation | KIAA1462  | p.P944H  | KIAA1462                   | 27   | 0.00 | 148    | (0.18) | 0.49 |
| 12-03 | Gp4 Focus 1 | g.chr10:30317100T>C | Silent            | KIAA1462  | p.R659R  | KIAA1462                   | 24   | 0.00 | 33     | (0.21) | 0.57 |
| 12-03 | Gp4 Focus 1 | g.chr9:115337178C>A | Missense Mutation | KIAA1958  | p.P273H  | KIAA1958                   | 65   | 0.00 | 45     | (0.60) | 1.60 |
| 12-03 | Gp4 Focus 1 | g.chr9:115422252T>C | Missense Mutation | KIAA1958  | p.L685S  | KIAA1958                   | 33   | 0.00 | 54     | (0.50) | 1.33 |
| 12-03 | Gp4 Focus 1 | g.chr8:29018297G>A  | Silent            | KIF13B    | p.L453L  | kinesin family member      | 25   | 0.00 | 21     | (0.24) | 0.63 |
| 12-03 | Gp4 Focus 1 | g.chr16:29810762C>A | Missense Mutation | KIF22     | p.Q245K  | kinesin family member      | 27   | 0.00 | 42     | (0.24) | 0.82 |
| 12-03 | Gp4 Focus 1 | g.chr6:168430296G>C | Missense Mutation | KIF25     | p.E11Q   | kinesin family member      | 24   | 0.00 | 21     | (0.29) | 0.76 |
| 12-03 | Gp4 Focus 1 | g.chr1:18808178G>A  | Missense Mutation | KLHDC7A   | p.E235K  | kelch domain containi      | 17   | 0.00 | 178    | (0.16) | 0.42 |
| 12-03 | Gp4 Focus 1 | g.chr17:40004382G>T | Missense Mutation | KLHL10    | p.K550N  | kelch-like family memb     | 85   | 0.00 | 139    | (0.14) | 0.48 |
| 12-03 | Gp4 Focus 1 | g.chr8:124659190G>A | Missense Mutation | KLHL38    | p.A472V  | kelch-like family memb     | 18   | 0.00 | 18     | (0.28) | 0.74 |
| 12-03 | Gp4 Focus 1 | g.chr1:152732461G>A | Missense Mutation | KPRP      | p.V133I  | keratinocyte proline-ric   | 61   | 0.00 | 50     | (0.34) | 0.91 |
| 12-03 | Gp4 Focus 1 | g.chr17:39635959G>A | Silent            | KRT35     | p.F152F  | keratin 35                 | 69   | 0.00 | 33     | (0.27) | 0.96 |
| 12-03 | Gp4 Focus 1 | g.chr12:53207575C>A | Missense Mutation | KRT4      | p.G90W   | keratin 4                  | 31   | 0.00 | 60     | (0.18) | 0.49 |
| 12-03 | Gp4 Focus 1 | g.chr12:53001984C>T | Missense Mutation | KRT73     | p.R540K  | keratin 73                 | 18   | 0.00 | 14     | (0.64) | 1.71 |
| 12-03 | Gp4 Focus 1 | g.chr12:52774911G>A | Missense Mutation | KRT84     | p.R386C  | keratin 84                 | 54   | 0.00 | 46     | (0.61) | 1.62 |
| 12-03 | Gp4 Focus 1 | g.chr17:39323867G>T | Missense Mutation | KRTAP4-3  | p.H186Q  | keratin associated protei  | 19   | 0.00 | 107    | (0.24) | 0.85 |
| 12-03 | Gp4 Focus 1 | g.chr11:1606289C>T  | Missense Mutation | KRTAP5-1  | p.C64Y   | keratin associated protei  | 19   | 0.00 | 183    | (0.20) | 0.54 |
| 12-03 | Gp4 Focus 1 | g.chr11:71276671G>T | Missense Mutation | KRTAP5-10 | p.G13V   | keratin associated protei  | 30   | 0.00 | 537    | (0.14) | 0.49 |
| 12-03 | Gp4 Focus 1 | g.chr11:71276674G>T | Missense Mutation | KRTAP5-10 | p.C14F   | keratin associated protei  | 30   | 0.00 | 546    | (0.14) | 0.50 |

|       |             |                      |                   |           |          |                           |            |            |      |
|-------|-------------|----------------------|-------------------|-----------|----------|---------------------------|------------|------------|------|
| 12-03 | Gp4 Focus 1 | g.chr11:1642759A>G   | Missense Mutation | KRTAP5-4  | p.C189R  | keratin associated protei | 19 (0.00)  | 209 (0.18) | 0.47 |
| 12-03 | Gp4 Focus 1 | g.chr17:39431995A>T  | Missense Mutation | KRTAP9-7  | p.T16S   | keratin associated protei | 21 (0.00)  | 50 (0.12)  | 0.42 |
| 12-03 | Gp4 Focus 1 | g.chr3:49160275C>T   | Missense Mutation | LAMB2     | p.E1479K | laminin, beta 2 (laminin  | 15 (0.00)  | 46 (0.37)  | 0.99 |
| 12-03 | Gp4 Focus 1 | g.chr3:49169590C>T   | Missense Mutation | LAMB2     | p.E140K  | laminin, beta 2 (laminin  | 24 (0.00)  | 112 (0.15) | 0.40 |
| 12-03 | Gp4 Focus 1 | g.chr16:67973926G>C  | Missense Mutation | LCAT      | p.L402V  | lecithin-cholesterol acyl | 18 (0.00)  | 162 (0.16) | 0.55 |
| 12-03 | Gp4 Focus 1 | g.chr1:152749133T>A  | Missense Mutation | LCE1F     | p.C96S   | late cornified envelope   | 116 (0.00) | 45 (0.16)  | 0.41 |
| 12-03 | Gp4 Focus 1 | g.chr16:25162893C>T  | Silent            | LCMT1     | p.S141S  | leucine carboxyl methyl   | 34 (0.00)  | 17 (0.29)  | 0.78 |
| 12-03 | Gp4 Focus 1 | g.chr2:48950801C>G   | Missense Mutation | LHCGR     | p.D140H  | luteinizing hormone/chc   | 51 (0.00)  | 20 (0.60)  | 1.60 |
| 12-03 | Gp4 Focus 1 | g.chr19:54758798G>A  | Missense Mutation | LILRB5    | p.T352I  | leukocyte immunoglobulu   | 25 (0.00)  | 62 (0.16)  | 0.58 |
| 12-03 | Gp4 Focus 1 | g.chr12:127229479T>G | lincRNA           | LINC00943 |          | long intergenic non-prot  | 53 (0.00)  | 13 (0.62)  | 1.64 |
| 12-03 | Gp4 Focus 1 | g.chr12:49494414G>A  | Silent            | LMBR1L    | p.S366S  | limb development meml     | 34 (0.00)  | 16 (0.50)  | 1.33 |
| 12-03 | Gp4 Focus 1 | g.chr12:49496292C>A  | Missense Mutation | LMBR1L    | p.C243F  | limb development meml     | 94 (0.00)  | 27 (0.19)  | 0.49 |
| 12-03 | Gp4 Focus 1 | g.chr8:12595506G>A   | Nonsense Mutation | LONRF1    | p.Q371*  | LON peptidase N-termi     | 23 (0.00)  | 15 (0.40)  | 1.07 |
| 12-03 | Gp4 Focus 1 | g.chr6:160969557G>A  | Missense Mutation | LPA       | p.P1703L | lipoprotein, Lp(a)        | 52 (0.00)  | 33 (0.64)  | 1.70 |
| 12-03 | Gp4 Focus 1 | g.chr4:62758537G>A   | Missense Mutation | LPHN3     | p.M480I  | latrophilin 3             | 16 (0.00)  | 91 (0.34)  | 0.91 |
| 12-03 | Gp4 Focus 1 | g.chr3:197598227C>T  | Missense Mutation | LRCH3     | p.P675L  | leucine-rich repeats and  | 56 (0.00)  | 32 (0.31)  | 0.83 |
| 12-03 | Gp4 Focus 1 | g.chr1:113657309C>A  | Missense Mutation | LRIG2     | p.L781I  | leucine-rich repeats and  | 22 (0.00)  | 18 (0.33)  | 0.89 |
| 12-03 | Gp4 Focus 1 | g.chr10:134161600G>C | Silent            | LRRC27    | p.G222G  | leucine rich repeat conta | 15 (0.00)  | 55 (0.15)  | 0.39 |
| 12-03 | Gp4 Focus 1 | g.chr16:67401226G>T  | Missense Mutation | LRRC36    | p.S233I  | leucine rich repeat conta | 80 (0.00)  | 130 (0.12) | 0.42 |
| 12-03 | Gp4 Focus 1 | g.chr17:30349165G>A  | Missense Mutation | LRRC37B   | p.A252T  | leucine rich repeat conta | 17 (0.00)  | 25 (0.48)  | 1.28 |
| 12-03 | Gp4 Focus 1 | g.chr1:156902658C>T  | Missense Mutation | LRRC71    | p.A526V  | leucine rich repeat conta | 38 (0.00)  | 44 (0.55)  | 1.08 |
| 12-03 | Gp4 Focus 1 | g.chr15:101569273G>T | Missense Mutation | LRRK1     | p.R933S  | leucine-rich repeat kina  | 34 (0.00)  | 26 (0.23)  | 0.62 |
| 12-03 | Gp4 Focus 1 | g.chr9:130243480G>A  | Silent            | LRSAM1    | p.E354E  | leucine rich repeat and   | s21 (0.00) | 39 (0.23)  | 0.62 |
| 12-03 | Gp4 Focus 1 | g.chr7:77656655G>A   | Intron            | MAGI2     |          | membrane associated gu    | 17 (0.00)  | 19 (0.58)  | 0.94 |
| 12-03 | Gp4 Focus 1 | g.chr7:77676744T>C   | Intron            | MAGI2     |          | membrane associated gu    | 34 (0.00)  | 8 (0.75)   | 1.22 |
| 12-03 | Gp4 Focus 1 | g.chr7:77733821G>A   | Intron            | MAGI2     |          | membrane associated gu    | 59 (0.00)  | 174 (0.35) | 0.57 |
| 12-03 | Gp4 Focus 1 | g.chr7:77850135T>A   | Intron            | MAGI2     |          | membrane associated gu    | 34 (0.00)  | 25 (0.36)  | 0.58 |
| 12-03 | Gp4 Focus 1 | g.chr7:77850562C>A   | Intron            | MAGI2     |          | membrane associated gu    | 51 (0.00)  | 23 (0.26)  | 0.42 |
| 12-03 | Gp4 Focus 1 | g.chr7:77892267G>A   | Intron            | MAGI2     |          | membrane associated gu    | 29 (0.00)  | 27 (0.74)  | 1.20 |
| 12-03 | Gp4 Focus 1 | g.chr7:77909529C>G   | Intron            | MAGI2     |          | membrane associated gu    | 81 (0.00)  | 18 (0.33)  | 0.54 |
| 12-03 | Gp4 Focus 1 | g.chr7:78071066G>A   | Intron            | MAGI2     |          | membrane associated gu    | 54 (0.00)  | 14 (0.43)  | 0.70 |
| 12-03 | Gp4 Focus 1 | g.chr7:78175397C>T   | Intron            | MAGI2     |          | membrane associated gu    | 36 (0.00)  | 26 (0.31)  | 0.50 |
| 12-03 | Gp4 Focus 1 | g.chr7:78222826G>A   | Intron            | MAGI2     |          | membrane associated gu    | 74 (0.00)  | 74 (0.51)  | 0.83 |
| 12-03 | Gp4 Focus 1 | g.chr7:78267807C>T   | Intron            | MAGI2     |          | membrane associated gu    | 46 (0.00)  | 13 (0.38)  | 0.62 |
| 12-03 | Gp4 Focus 1 | g.chr7:78320551G>T   | Intron            | MAGI2     |          | membrane associated gu    | 74 (0.00)  | 37 (0.81)  | 1.32 |

|       |             |                     |                   |          |          |                           |            |            |      |
|-------|-------------|---------------------|-------------------|----------|----------|---------------------------|------------|------------|------|
| 12-03 | Gp4 Focus 1 | g.chr7:78330881G>C  | Intron            | MAGI2    |          | membrane associated gu    | 72 (0.00)  | 19 (0.32)  | 0.51 |
| 12-03 | Gp4 Focus 1 | g.chr7:78347325C>T  | Intron            | MAGI2    |          | membrane associated gu    | 54 (0.00)  | 18 (0.33)  | 0.54 |
| 12-03 | Gp4 Focus 1 | g.chr7:78358257T>A  | Intron            | MAGI2    |          | membrane associated gu    | 24 (0.00)  | 28 (0.57)  | 0.93 |
| 12-03 | Gp4 Focus 1 | g.chr7:78394117C>T  | Intron            | MAGI2    |          | membrane associated gu    | 72 (0.00)  | 28 (0.32)  | 0.52 |
| 12-03 | Gp4 Focus 1 | g.chr7:78452926G>T  | Intron            | MAGI2    |          | membrane associated gu    | 33 (0.00)  | 16 (0.69)  | 1.12 |
| 12-03 | Gp4 Focus 1 | g.chr7:78576569C>A  | Intron            | MAGI2    |          | membrane associated gu    | 64 (0.00)  | 51 (0.84)  | 1.37 |
| 12-03 | Gp4 Focus 1 | g.chr7:78623290C>T  | Intron            | MAGI2    |          | membrane associated gu    | 51 (0.00)  | 58 (0.62)  | 1.01 |
| 12-03 | Gp4 Focus 1 | g.chr7:78632469C>T  | Intron            | MAGI2    |          | membrane associated gu    | 29 (0.00)  | 24 (0.25)  | 0.41 |
| 12-03 | Gp4 Focus 1 | g.chr7:78744128G>A  | Intron            | MAGI2    |          | membrane associated gu    | 83 (0.00)  | 21 (0.71)  | 1.16 |
| 12-03 | Gp4 Focus 1 | g.chr7:78907790C>A  | Intron            | MAGI2    |          | membrane associated gu    | 85 (0.00)  | 31 (0.48)  | 0.79 |
| 12-03 | Gp4 Focus 1 | g.chr7:78929586G>A  | Intron            | MAGI2    |          | membrane associated gu    | 56 (0.00)  | 26 (0.38)  | 0.62 |
| 12-03 | Gp4 Focus 1 | g.chr7:79007288C>A  | Intron            | MAGI2    |          | membrane associated gu    | 57 (0.02)  | 16 (0.38)  | 0.61 |
| 12-03 | Gp4 Focus 1 | g.chr1:26109087A>G  | Silent            | MAN1C1   | p.K554K  | mannosidase, alpha, cla   | 49 (0.00)  | 41 (0.54)  | 1.43 |
| 12-03 | Gp4 Focus 1 | g.chr2:210574820C>G | Missense Mutation | MAP2     | p.P1639A | microtubule-associated j  | 36 (0.00)  | 41 (0.68)  | 1.82 |
| 12-03 | Gp4 Focus 1 | g.chr12:53875875G>A | Silent            | MAP3K12  | p.S810S  | mitogen-activated protei  | 126 (0.00) | 202 (0.23) | 0.62 |
| 12-03 | Gp4 Focus 1 | g.chr2:128065234A>G | Missense Mutation | MAP3K2   | p.L594P  | mitogen-activated protei  | 52 (0.00)  | 63 (0.43)  | 1.14 |
| 12-03 | Gp4 Focus 1 | g.chr2:102493508G>T | Silent            | MAP4K4   | p.L865L  | mitogen-activated protei  | 120 (0.00) | 21 (0.67)  | 1.78 |
| 12-03 | Gp4 Focus 1 | g.chr10:49618192C>T | Missense Mutation | MAPK8    | p.S144F  | mitogen-activated protei  | 90 (0.00)  | 14 (0.43)  | 1.14 |
| 12-03 | Gp4 Focus 1 | g.chr11:45926046G>T | Silent            | MAPK8IP1 | p.V559V  | mitogen-activated protei  | 32 (0.00)  | 114 (0.15) | 0.40 |
| 12-03 | Gp4 Focus 1 | g.chr19:8491618C>T  | Missense Mutation | MARCH2   | p.S101F  | membrane-associated ri    | 24 (0.00)  | 110 (0.22) | 0.83 |
| 12-03 | Gp4 Focus 1 | g.chr2:160605253C>T | Silent            | MARCH7   | p.F446F  | membrane-associated ri    | 87 (0.00)  | 99 (0.18)  | 0.48 |
| 12-03 | Gp4 Focus 1 | g.chr12:57906703G>C | Missense Mutation | MARS     | p.K641N  | methionyl-tRNA synthe     | 78 (0.00)  | 71 (0.14)  | 0.38 |
| 12-03 | Gp4 Focus 1 | g.chr2:198571547T>C | Missense Mutation | MARS2    | p.L473P  | methionyl-tRNA synthe     | 47 (0.02)  | 24 (0.29)  | 0.78 |
| 12-03 | Gp4 Focus 1 | g.chr10:27462169G>T | Silent            | MASTL    | p.L749L  | microtubule associated s  | 56 (0.00)  | 16 (0.56)  | 1.50 |
| 12-03 | Gp4 Focus 1 | g.chr2:149227461C>G | Missense Mutation | MBD5     | p.S650C  | methyl-CpG binding do     | 86 (0.00)  | 20 (0.25)  | 0.67 |
| 12-03 | Gp4 Focus 1 | g.chr8:48874231C>T  | Missense Mutation | MCM4     | p.H76Y   | minichromosome maint      | 36 (0.00)  | 196 (0.17) | 0.46 |
| 12-03 | Gp4 Focus 1 | g.chr17:60043897G>C | Missense Mutation | MED13    | p.S1436C | mediator complex subur    | 22 (0.00)  | 36 (0.14)  | 0.50 |
| 12-03 | Gp4 Focus 1 | g.chr22:42112059C>T | Silent            | MEI1     | p.P146P  | meiosis inhibitor 1       | 71 (0.00)  | 93 (0.44)  | 1.48 |
| 12-03 | Gp4 Focus 1 | g.chr18:29793225C>A | Missense Mutation | MEP1B    | p.P428T  | meprin A, beta            | 30 (0.00)  | 108 (0.24) | 0.64 |
| 12-03 | Gp4 Focus 1 | g.chr7:116435748G>T | Nonsense Mutation | MET      | p.G1298* | MET proto-oncogene, r     | 58 (0.00)  | 52 (0.23)  | 0.62 |
| 12-03 | Gp4 Focus 1 | g.chr14:21969941A>T | Nonsense Mutation | METTL3   | p.C276*  | methyltransferase like 3  | 35 (0.00)  | 19 (0.26)  | 0.51 |
| 12-03 | Gp4 Focus 1 | g.chr17:8701456G>A  | Missense Mutation | MFSD6L   | p.S328L  | major facilitator superfa | 24 (0.00)  | 101 (0.35) | 0.92 |
| 12-03 | Gp4 Focus 1 | g.chr15:42058719G>C | Missense Mutation | MGA      | p.M2813I | MGA, MAX dimerizati       | 16 (0.00)  | 34 (0.32)  | 0.86 |
| 12-03 | Gp4 Focus 1 | g.chr15:42058770T>A | Silent            | MGA      | p.I2830I | MGA, MAX dimerizati       | 16 (0.00)  | 18 (0.33)  | 0.89 |
| 12-03 | Gp4 Focus 1 | g.chr22:39883477G>T | Missense Mutation | MGAT3    | p.S42I   | mannosyl (beta-1,4-)-gl   | 43 (0.00)  | 208 (0.13) | 0.45 |



|       |             |                      |                   |        |          |                           |              |            |      |
|-------|-------------|----------------------|-------------------|--------|----------|---------------------------|--------------|------------|------|
| 12-03 | Gp4 Focus 1 | g.chr10:103557825G>T | Silent            | MGEA5  | p.A632A  | meningioma expressed      | 31 (0.00)    | 45 (0.27)  | 0.71 |
| 12-03 | Gp4 Focus 1 | g.chr1:9211787G>T    | RNA               | MIR34A |          | microRNA 34a              | 115 (0.00)   | 259 (0.14) | 0.38 |
| 12-03 | Gp4 Focus 1 | g.chr10:99227308G>T  | Silent            | MMS19  | p.L417L  | MMS19 nucleotide exci     | 34 (0.03)    | 25 (0.56)  | 1.49 |
| 12-03 | Gp4 Focus 1 | g.chr14:93650183C>A  | Missense Mutation | MOAP1  | p.Q135H  | modulator of apoptosis    | 31 (0.00)    | 51 (0.22)  | 0.58 |
| 12-03 | Gp4 Focus 1 | g.chr12:62919843T>C  | Missense Mutation | MON2   | p.I454T  | MON2 homolog (S. cere     | 45 (0.00)    | 24 (0.21)  | 0.56 |
| 12-03 | Gp4 Focus 1 | g.chr10:99377032A>T  | Missense Mutation | MORN4  | p.Y39N   | MORN repeat containin     | 61 (0.00)    | 27 (0.30)  | 0.79 |
| 12-03 | Gp4 Focus 1 | g.chr16:133110G>T    | Missense Mutation | MPG    | p.E125D  | N-methylpurine-DNA g      | 21 (0.00)    | 93 (0.18)  | 0.64 |
| 12-03 | Gp4 Focus 1 | g.chr11:118107927G>A | Missense Mutation | MPZL3  | p.R85W   | myelin protein zero-like  | 79 (0.00)    | 15 (0.33)  | 0.89 |
| 12-03 | Gp4 Focus 1 | g.chr5:41015568T>G   | Missense Mutation | MROH2B | p.E966A  | maestro heat-like repeat  | 33 (0.00)    | 21 (0.29)  | 0.76 |
| 12-03 | Gp4 Focus 1 | g.chr20:35752035C>A  | Silent            | MROH8  | p.V651V  | maestro heat-like repeat  | 23 (0.00)    | 48 (0.15)  | 0.39 |
| 12-03 | Gp4 Focus 1 | g.chr20:35752096C>A  | Missense Mutation | MROH8  | p.S631I  | maestro heat-like repeat  | 29 (0.00)    | 57 (0.16)  | 0.42 |
| 12-03 | Gp4 Focus 1 | g.chr1:38283131C>T   | Silent            | MTF1   | p.K597K  | metal-regulatory transcr  | 34 (0.00)    | 64 (0.42)  | 1.39 |
| 12-03 | Gp4 Focus 1 | g.chr1:11181417C>T   | Silent            | MTOR   | p.P2273P | mechanistic target of rap | 31 (0.00)    | 10 (0.70)  | 1.87 |
| 12-03 | Gp4 Focus 1 | g.chr1:155160711G>T  | Silent            | MUC1   | p.L272L  | mucin 1, cell surface ass | 38 (0.00)    | 70 (0.36)  | 0.95 |
| 12-03 | Gp4 Focus 1 | g.chr19:9065791C>T   | Missense Mutation | MUC16  | p.E7219K | mucin 16, cell surface a  | 18 (0.00)    | 33 (0.18)  | 0.48 |
| 12-03 | Gp4 Focus 1 | g.chr19:9073305C>T   | Missense Mutation | MUC16  | p.G4714E | mucin 16, cell surface a  | 70 (0.01)    | 18 (0.44)  | 1.19 |
| 12-03 | Gp4 Focus 1 | g.chr19:9083366G>A   | Missense Mutation | MUC16  | p.L2817F | mucin 16, cell surface a  | 32 (0.00)    | 42 (0.31)  | 0.83 |
| 12-03 | Gp4 Focus 1 | g.chr19:9086956G>A   | Missense Mutation | MUC16  | p.T1620I | mucin 16, cell surface a  | 26 (0.00)    | 21 (0.29)  | 0.76 |
| 12-03 | Gp4 Focus 1 | g.chr19:9088933G>C   | Missense Mutation | MUC16  | p.A961G  | mucin 16, cell surface a  | 63 (0.00)    | 43 (0.49)  | 1.30 |
| 12-03 | Gp4 Focus 1 | g.chr19:9091090G>T   | Missense Mutation | MUC16  | p.P242H  | mucin 16, cell surface a  | 52 (0.00)    | 66 (0.17)  | 0.44 |
| 12-03 | Gp4 Focus 1 | g.chr7:100551962C>T  | Missense Mutation | MUC3A  | p.T238I  | mucin 3A, cell surface a  | 220 (0.00)   | 49 (0.14)  | 0.38 |
| 12-03 | Gp4 Focus 1 | g.chr11:1263688G>T   | Nonsense Mutation | MUC5B  | p.E1860* | mucin 5B, oligomeric m    | 21 (0.00)    | 184 (0.32) | 0.84 |
| 12-03 | Gp4 Focus 1 | g.chr11:1018152G>A   | Missense Mutation | MUC6   | p.T1550I | mucin 6, oligomeric mu    | 146 (0.00)   | 32 (0.59)  | 1.58 |
| 12-03 | Gp4 Focus 1 | g.chr17:74673707C>T  | Missense Mutation | MXRA7  | p.G193D  | matrix-remodelling asso   | 60 (0.00)    | 44 (0.11)  | 0.40 |
| 12-03 | Gp4 Focus 1 | g.chr8:67492521C>A   | Missense Mutation | MYBL1  | p.E316D  | v-myb avian myeloblast    | 17 (0.00)    | 22 (0.32)  | 0.85 |
| 12-03 | Gp4 Focus 1 | g.chr20:42331459C>A  | Missense Mutation | MYBL2  | p.S427R  | v-myb avian myeloblast    | 19 (0.00)    | 31 (0.23)  | 0.60 |
| 12-03 | Gp4 Focus 1 | g.chr2:241069366G>T  | Missense Mutation | MYEOV2 | p.R115S  | myeloma overexpressed     | 21 (0.00)    | 93 (0.20)  | 0.54 |
| 12-03 | Gp4 Focus 1 | g.chr3:108216932G>A  | Silent            | MYH15  | p.T215T  | myosin, heavy chain 15    | 43 (0.00)    | 35 (0.29)  | 0.76 |
| 12-03 | Gp4 Focus 1 | g.chr17:10369730C>T  | Missense Mutation | MYH4   | p.V70I   | myosin, heavy chain 4,    | 17 (0.00)    | 29 (0.21)  | 0.55 |
| 12-03 | Gp4 Focus 1 | g.chr14:23871723T>C  | Missense Mutation | MYH6   | p.K364R  | myosin, heavy chain 6,    | 17 (0.00)    | 59 (0.20)  | 0.39 |
| 12-03 | Gp4 Focus 1 | g.chr14:23871750C>T  | Missense Mutation | MYH6   | p.G355E  | myosin, heavy chain 6,    | 18 (0.00)    | 104 (0.23) | 0.44 |
| 12-03 | Gp4 Focus 1 | g.chr17:45297317A>T  | Missense Mutation | MYL4   | p.M71L   | myosin, light chain 4,    | al 36 (0.00) | 41 (0.20)  | 0.70 |
| 12-03 | Gp4 Focus 1 | g.chr3:123452570C>T  | Missense Mutation | MYLK   | p.V425I  | myosin light chain kinas  | 31 (0.00)    | 31 (0.26)  | 0.69 |
| 12-03 | Gp4 Focus 1 | g.chr16:46761162G>T  | Missense Mutation | MYLK3  | p.H293N  | myosin light chain kinas  | 25 (0.00)    | 25 (0.32)  | 0.85 |
| 12-03 | Gp4 Focus 1 | g.chr17:27417925C>T  | Missense Mutation | MYO18A | p.R1736H | myosin XVIIIa             | 66 (0.00)    | 21 (0.52)  | 1.73 |

|       |             |                      |                   |         |          |                           |            |            |      |
|-------|-------------|----------------------|-------------------|---------|----------|---------------------------|------------|------------|------|
| 12-03 | Gp4 Focus 1 | g.chr17:27438822C>T  | Silent            | MYO18A  | p.E886E  | myosin XVIII              | 40 (0.00)  | 60 (0.22)  | 0.72 |
| 12-03 | Gp4 Focus 1 | g.chr17:34854268C>G  | Missense Mutation | MYO19   | p.G867R  | myosin XIX                | 59 (0.00)  | 80 (0.41)  | 1.44 |
| 12-03 | Gp4 Focus 1 | g.chr12:57441853G>T  | Silent            | MYO1A   | p.P50P   | myosin IA                 | 46 (0.00)  | 19 (0.37)  | 0.98 |
| 12-03 | Gp4 Focus 1 | g.chr2:171264245G>A  | Silent            | MYO3B   | p.G847G  | myosin IIIB               | 115 (0.00) | 18 (0.28)  | 0.74 |
| 12-03 | Gp4 Focus 1 | g.chr18:3083883G>T   | Missense Mutation | MYOM1   | p.A1463D | myomesin 1                | 20 (0.00)  | 34 (0.85)  | 2.27 |
| 12-03 | Gp4 Focus 1 | g.chr8:2027652G>T    | Nonsense Mutation | MYOM2   | p.E492*  | myomesin 2                | 66 (0.00)  | 20 (0.30)  | 0.80 |
| 12-03 | Gp4 Focus 1 | g.chr16:5081798G>T   | Missense Mutation | NAGPA   | p.S210R  | N-acetylglucosamine-1-    | 176 (0.00) | 127 (0.13) | 0.44 |
| 12-03 | Gp4 Focus 1 | g.chr11:34153768G>A  | Splice Site       | NAT10   | p.K539K  | N-acetyltransferase 10 (  | 86 (0.00)  | 151 (0.62) | 1.66 |
| 12-03 | Gp4 Focus 1 | g.chr12:78513335A>G  | Missense Mutation | NAV3    | p.Q1120R | neuron navigator 3        | 109 (0.00) | 33 (0.67)  | 1.78 |
| 12-03 | Gp4 Focus 1 | g.chr2:203972381C>T  | Silent            | NBEAL1  | p.V444V  | neurobeachin-like 1       | 23 (0.00)  | 43 (0.26)  | 0.68 |
| 12-03 | Gp4 Focus 1 | g.chr5:85589147G>T   | RNA               | NBPF22P |          | neuroblastoma breakpoi    | 20 (0.00)  | 20 (0.85)  | 2.27 |
| 12-03 | Gp4 Focus 1 | g.chr12:124885101C>T | Missense Mutation | NCOR2   | p.A587T  | nuclear receptor corepre  | 48 (0.00)  | 258 (0.14) | 0.38 |
| 12-03 | Gp4 Focus 1 | g.chr22:42483072C>A  | Missense Mutation | NDUFA6  | p.V83F   | NADH dehydrogenase (56    | 56 (0.00)  | 138 (0.51) | 1.73 |
| 12-03 | Gp4 Focus 1 | g.chr2:152515602C>A  | Missense Mutation | NEB     | p.A2018S | nebulin                   | 35 (0.00)  | 31 (0.35)  | 0.95 |
| 12-03 | Gp4 Focus 1 | g.chr1:72748156G>T   | Missense Mutation | NEGR1   | p.Q8K    | neuronal growth regulat   | 26 (0.00)  | 18 (0.56)  | 1.48 |
| 12-03 | Gp4 Focus 1 | g.chr15:73547154G>T  | Silent            | NEO1    | p.L692L  | neogenin 1                | 99 (0.00)  | 46 (0.20)  | 0.52 |
| 12-03 | Gp4 Focus 1 | g.chr12:54687011G>A  | Missense Mutation | NFE2    | p.S90F   | nuclear factor, erythroid | 26 (0.00)  | 103 (0.26) | 0.70 |
| 12-03 | Gp4 Focus 1 | g.chr10:104157838G>A | Silent            | NFKB2   | p.Q254Q  | nuclear factor of kappa l | 48 (0.02)  | 131 (0.35) | 0.94 |
| 12-03 | Gp4 Focus 1 | g.chr6:138768235C>A  | Silent            | NHSL1   | p.T193T  | NHS-like 1                | 32 (0.00)  | 30 (0.17)  | 0.44 |
| 12-03 | Gp4 Focus 1 | g.chr14:51225021G>A  | Silent            | NIN     | p.V909V  | ninein (GSK3B interacti   | 38 (0.00)  | 84 (0.15)  | 0.41 |
| 12-03 | Gp4 Focus 1 | g.chr6:28228057G>A   | Missense Mutation | NKAPL   | p.G303D  | NFKB activating proteir   | 22 (0.00)  | 57 (0.30)  | 1.00 |
| 12-03 | Gp4 Focus 1 | g.chr8:23539058G>A   | Silent            | NKX3-1  | p.S127S  | NK3 homeobox 1            | 22 (0.00)  | 55 (0.33)  | 0.41 |
| 12-03 | Gp4 Focus 1 | g.chr17:5462474C>G   | Missense Mutation | NLRP1   | p.W514C  | NLR family, pyrin dom:    | 49 (0.00)  | 23 (0.39)  | 1.04 |
| 12-03 | Gp4 Focus 1 | g.chr17:5485186G>A   | Silent            | NLRP1   | p.Y215Y  | NLR family, pyrin dom:    | 19 (0.00)  | 19 (0.37)  | 0.98 |
| 12-03 | Gp4 Focus 1 | g.chr19:54313438G>A  | Missense Mutation | NLRP12  | p.S492F  | NLR family, pyrin dom:    | 33 (0.00)  | 174 (0.11) | 0.41 |
| 12-03 | Gp4 Focus 1 | g.chr11:119052829C>A | Missense Mutation | NLRX1   | p.A794E  | NLR family member X1      | 180 (0.00) | 159 (0.19) | 0.50 |
| 12-03 | Gp4 Focus 1 | g.chr9:33466983T>C   | Missense Mutation | NOL6    | p.H626R  | nucleolar protein 6 (RN.  | 34 (0.00)  | 95 (0.44)  | 1.18 |
| 12-03 | Gp4 Focus 1 | g.chr4:2955285G>A    | Missense Mutation | NOP14   | p.H234Y  | NOP14 nucleolar protei    | 28 (0.00)  | 35 (0.43)  | 1.14 |
| 12-03 | Gp4 Focus 1 | g.chr20:2635483C>T   | Silent            | NOP56   | p.S153S  | NOP56 ribonucleoprote     | 41 (0.00)  | 47 (0.53)  | 1.42 |
| 12-03 | Gp4 Focus 1 | g.chr7:150696168C>A  | Missense Mutation | NOS3    | p.H317Q  | nitric oxide synthase 3 ( | 17 (0.00)  | 175 (0.16) | 0.43 |
| 12-03 | Gp4 Focus 1 | g.chr1:120468186G>T  | Missense Mutation | NOTCH2  | p.P1418H | notch 2                   | 25 (0.00)  | 79 (0.18)  | 0.47 |
| 12-03 | Gp4 Focus 1 | g.chr15:24921972G>T  | Missense Mutation | NPAP1   | p.A320S  | nuclear pore associated   | 30 (0.00)  | 117 (0.21) | 0.55 |
| 12-03 | Gp4 Focus 1 | g.chr18:21119842C>T  | Missense Mutation | NPC1    | p.G910S  | Niemann-Pick disease, t   | 31 (0.00)  | 12 (0.75)  | 2.00 |
| 12-03 | Gp4 Focus 1 | g.chr17:45695820T>C  | Silent            | NPEPPS  | p.L800L  | aminopeptidase puromy     | 34 (0.00)  | 41 (0.15)  | 0.53 |
| 12-03 | Gp4 Focus 1 | g.chr18:11621260G>A  | RNA               | NPIPBP1 |          | nuclear pore complex in   | 77 (0.00)  | 52 (0.90)  | 2.41 |

|       |             |                      |                   |        |          |                                      |            |      |
|-------|-------------|----------------------|-------------------|--------|----------|--------------------------------------|------------|------|
| 12-03 | Gp4 Focus 1 | g.chr16:21848648C>T  | Missense Mutation | NPIP4  | p.A354T  | nuclear pore complex in 109 (0.00)   | 27 (0.19)  | 0.49 |
| 12-03 | Gp4 Focus 1 | g.chr3:50387232G>T   | Missense Mutation | NPRL2  | p.P68H   | nitrogen permease regul 45 (0.00)    | 197 (0.19) | 0.51 |
| 12-03 | Gp4 Focus 1 | g.chr19:50881430C>T  | Missense Mutation | NR1H2  | p.P69L   | nuclear receptor subfam 41 (0.00)    | 353 (0.11) | 0.38 |
| 12-03 | Gp4 Focus 1 | g.chr1:52266322C>G   | Missense Mutation | NRD1   | p.E851Q  | nardilysin (N-arginine d 31 (0.00)   | 46 (0.15)  | 0.41 |
| 12-03 | Gp4 Focus 1 | g.chr2:11802161T>C   | Missense Mutation | NTSR2  | p.Q277R  | neurotensin receptor 2 68 (0.00)     | 50 (0.42)  | 1.12 |
| 12-03 | Gp4 Focus 1 | g.chr1:205274349G>T  | Nonsense Mutation | NUAK2  | p.Y267*  | NUAK family, SNF1-lil32 (0.00)       | 68 (0.84)  | 2.24 |
| 12-03 | Gp4 Focus 1 | g.chr3:13407560G>T   | Missense Mutation | NUP210 | p.S606R  | nucleoporin 210kDa 18 (0.00)         | 61 (0.16)  | 0.44 |
| 12-03 | Gp4 Focus 1 | g.chr9:134073349G>A  | Missense Mutation | NUP214 | p.G1490S | nucleoporin 214kDa 54 (0.00)         | 83 (0.29)  | 0.98 |
| 12-03 | Gp4 Focus 1 | g.chr4:77053744G>A   | Missense Mutation | NUP54  | p.T232I  | nucleoporin 54kDa 62 (0.02)          | 36 (0.92)  | 2.44 |
| 12-03 | Gp4 Focus 1 | g.chr4:77053751C>A   | Missense Mutation | NUP54  | p.G230C  | nucleoporin 54kDa 62 (0.00)          | 32 (0.81)  | 2.17 |
| 12-03 | Gp4 Focus 1 | g.chr15:34648611G>C  | Missense Mutation | NUTM1  | p.G801A  | NUT midline carcinoma55 (0.00)       | 57 (0.58)  | 1.54 |
| 12-03 | Gp4 Focus 1 | g.chr11:62560130C>T  | Missense Mutation | NXF1   | p.A602T  | nuclear RNA export fac 26 (0.00)     | 27 (0.22)  | 0.47 |
| 12-03 | Gp4 Focus 1 | g.chr11:62571376C>A  | Nonsense Mutation | NXF1   | p.E35*   | nuclear RNA export fac 38 (0.00)     | 67 (0.45)  | 0.95 |
| 12-03 | Gp4 Focus 1 | g.chr2:226446931C>T  | Silent            | NYAP2  | p.A266A  | neuronal tyrosine-phosp 44 (0.00)    | 94 (0.27)  | 0.71 |
| 12-03 | Gp4 Focus 1 | g.chr12:113355463T>C | Silent            | OAS1   | p.F332F  | 2'-5'-oligoadenylate syn 37 (0.00)   | 21 (0.43)  | 1.14 |
| 12-03 | Gp4 Focus 1 | g.chr12:121465503C>A | Missense Mutation | OASL   | p.G259C  | 2'-5'-oligoadenylate syn 21 (0.00)   | 15 (0.47)  | 1.63 |
| 12-03 | Gp4 Focus 1 | g.chr1:228437805C>G  | Missense Mutation | OBSCN  | p.S1483R | obscurin, cytoskeletal c 24 (0.00)   | 112 (0.17) | 0.59 |
| 12-03 | Gp4 Focus 1 | g.chr1:228481986G>A  | Silent            | OBSCN  | p.G4184G | obscurin, cytoskeletal c 101 (0.00)  | 103 (0.29) | 1.00 |
| 12-03 | Gp4 Focus 1 | g.chr2:220432687G>T  | Silent            | OBSL1  | p.P429P  | obscurin-like 1 16 (0.00)            | 96 (0.22)  | 0.58 |
| 12-03 | Gp4 Focus 1 | g.chr9:138011508G>A  | Silent            | OLFM1  | p.K287K  | olfactomedin 1 35 (0.00)             | 52 (0.15)  | 0.52 |
| 12-03 | Gp4 Focus 1 | g.chr19:15838887T>C  | Missense Mutation | OR10H2 | p.F12L   | olfactory receptor, famil 38 (0.00)  | 115 (0.17) | 0.62 |
| 12-03 | Gp4 Focus 1 | g.chr11:123847475C>T | Silent            | OR10S1 | p.E308E  | olfactory receptor, famil 42 (0.00)  | 14 (0.36)  | 0.75 |
| 12-03 | Gp4 Focus 1 | g.chr11:123848358G>A | Missense Mutation | OR10S1 | p.T14M   | olfactory receptor, famil 61 (0.00)  | 26 (0.96)  | 2.01 |
| 12-03 | Gp4 Focus 1 | g.chr1:158368708T>C  | Silent            | OR10T2 | p.A183A  | olfactory receptor, famil 29 (0.00)  | 17 (0.47)  | 0.93 |
| 12-03 | Gp4 Focus 1 | g.chr10:45799184G>T  | Missense Mutation | OR13A1 | p.F229L  | olfactory receptor, famil 50 (0.00)  | 53 (0.32)  | 0.86 |
| 12-03 | Gp4 Focus 1 | g.chr17:2996112T>C   | Missense Mutation | OR1D2  | p.Y60C   | olfactory receptor, famil 109 (0.00) | 36 (0.31)  | 0.81 |
| 12-03 | Gp4 Focus 1 | g.chr6:27879265C>T   | Missense Mutation | OR2B2  | p.C278Y  | olfactory receptor, famil 25 (0.00)  | 29 (0.28)  | 0.93 |
| 12-03 | Gp4 Focus 1 | g.chr16:3406177C>T   | Silent            | OR2C1  | p.P79P   | olfactory receptor, famil 39 (0.00)  | 64 (0.69)  | 2.40 |
| 12-03 | Gp4 Focus 1 | g.chr1:248059704G>A  | Missense Mutation | OR2W3  | p.M272I  | olfactory receptor, famil 19 (0.00)  | 64 (0.27)  | 0.71 |
| 12-03 | Gp4 Focus 1 | g.chr12:55820487C>A  | Missense Mutation | OR6C76 | p.F150L  | olfactory receptor, famil 41 (0.00)  | 72 (0.62)  | 1.67 |
| 12-03 | Gp4 Focus 1 | g.chr11:124179969C>A | Nonsense Mutation | OR8D1  | p.E232*  | olfactory receptor, famil 15 (0.00)  | 11 (0.45)  | 1.21 |
| 12-03 | Gp4 Focus 1 | g.chr11:124180573C>T | Silent            | OR8D1  | p.L30L   | olfactory receptor, famil 66 (0.02)  | 42 (0.26)  | 0.70 |
| 12-03 | Gp4 Focus 1 | g.chr11:55979081G>T  | RNA               | OR8J2  |          | olfactory receptor, famil 22 (0.00)  | 46 (0.30)  | 0.65 |
| 12-03 | Gp4 Focus 1 | g.chr2:148693231G>T  | Missense Mutation | ORC4   | p.P387T  | origin recognition comp 54 (0.00)    | 32 (0.28)  | 0.75 |
| 12-03 | Gp4 Focus 1 | g.chr11:59375994G>T  | Missense Mutation | OSBP   | p.A262D  | oxysterol binding protei 75 (0.00)   | 26 (0.19)  | 0.41 |

|       |             |                     |                   |         |          |                           |            |            |      |
|-------|-------------|---------------------|-------------------|---------|----------|---------------------------|------------|------------|------|
| 12-03 | Gp4 Focus 1 | g.chr22:31285623G>T | Splice Site       | OSBP2   | p.P541P  | oxysterol binding protei  | 21 (0.00)  | 49 (0.29)  | 0.76 |
| 12-03 | Gp4 Focus 1 | g.chr17:72926558C>A | Missense Mutation | OTOP2   | p.S276R  | otopetrin 2               | 52 (0.00)  | 229 (0.13) | 0.46 |
| 12-03 | Gp4 Focus 1 | g.chr12:56715869G>A | Silent            | PAN2    | p.N931N  | PAN2 poly(A) specific     | 129 (0.00) | 31 (0.90)  | 2.41 |
| 12-03 | Gp4 Focus 1 | g.chr3:142681301C>A | Missense Mutation | PAQR9   | p.S293I  | progesterin and adipoQ re | 50 (0.00)  | 147 (0.17) | 0.45 |
| 12-03 | Gp4 Focus 1 | g.chr3:122418412G>A | Silent            | PARP14  | p.K337K  | poly (ADP-ribose) poly    | 19 (0.00)  | 13 (0.54)  | 1.44 |
| 12-03 | Gp4 Focus 1 | g.chr11:59410430G>A | Nonsense Mutation | PATL1   | p.Q658*  | protein associated with t | 30 (0.00)  | 33 (0.24)  | 0.51 |
| 12-03 | Gp4 Focus 1 | g.chr22:31723065T>C | Missense Mutation | PATZ1   | p.K626E  | POZ (BTB) and AT hoc      | 34 (0.00)  | 94 (0.46)  | 1.22 |
| 12-03 | Gp4 Focus 1 | g.chr6:138539221G>A | Silent            | PBOV1   | p.A104A  | prostate and breast canc  | 19 (0.00)  | 153 (0.61) | 1.62 |
| 12-03 | Gp4 Focus 1 | g.chr5:141336844G>A | Silent            | PCDH12  | p.T191T  | protocadherin 12          | 59 (0.00)  | 107 (0.55) | 1.47 |
| 12-03 | Gp4 Focus 1 | g.chr4:30725726C>T  | Silent            | PCDH7   | p.I894I  | protocadherin 7           | 18 (0.00)  | 14 (0.43)  | 1.14 |
| 12-03 | Gp4 Focus 1 | g.chr5:140255823C>T | Nonsense Mutation | PCDHA12 | p.Q256*  | protocadherin alpha 12    | 74 (0.00)  | 169 (0.21) | 0.57 |
| 12-03 | Gp4 Focus 1 | g.chr5:140187130G>A | Missense Mutation | PCDHA4  | p.D120N  | protocadherin alpha 4     | 41 (0.00)  | 78 (0.22)  | 0.58 |
| 12-03 | Gp4 Focus 1 | g.chr5:140222601G>A | Silent            | PCDHA8  | p.L565L  | protocadherin alpha 8     | 29 (0.00)  | 333 (0.15) | 0.40 |
| 12-03 | Gp4 Focus 1 | g.chr5:140626167A>G | Missense Mutation | PCDHB15 | p.N341D  | protocadherin beta 15     | 72 (0.00)  | 34 (0.18)  | 0.47 |
| 12-03 | Gp4 Focus 1 | g.chr5:140626362G>C | Missense Mutation | PCDHB15 | p.E406Q  | protocadherin beta 15     | 22 (0.00)  | 18 (0.78)  | 2.07 |
| 12-03 | Gp4 Focus 1 | g.chr5:140476709C>A | Missense Mutation | PCDHB2  | p.Q779K  | protocadherin beta 2      | 46 (0.02)  | 10 (0.80)  | 2.13 |
| 12-03 | Gp4 Focus 1 | g.chr5:140530297G>A | Silent            | PCDHB6  | p.L153L  | protocadherin beta 6      | 38 (0.00)  | 47 (0.23)  | 0.62 |
| 12-03 | Gp4 Focus 1 | g.chr5:140711911G>T | Missense Mutation | PCDHGA1 | p.D554Y  | protocadherin gamma st    | 63 (0.00)  | 35 (0.26)  | 0.69 |
| 12-03 | Gp4 Focus 1 | g.chr5:140744399C>T | Missense Mutation | PCDHGA5 | p.R168W  | protocadherin gamma st    | 40 (0.00)  | 89 (0.26)  | 0.69 |
| 12-03 | Gp4 Focus 1 | g.chr5:140750396G>A | Silent            | PCDHGB3 | p.L145L  | protocadherin gamma st    | 114 (0.00) | 95 (0.17)  | 0.45 |
| 12-03 | Gp4 Focus 1 | g.chr5:140799690G>T | Missense Mutation | PCDHGB7 | p.C755F  | protocadherin gamma st    | 21 (0.00)  | 30 (0.30)  | 0.80 |
| 12-03 | Gp4 Focus 1 | g.chr5:140865638G>A | Missense Mutation | PCDHGC4 | p.G300R  | protocadherin gamma st    | 35 (0.00)  | 131 (0.24) | 0.63 |
| 12-03 | Gp4 Focus 1 | g.chr14:71540492G>T | Missense Mutation | PCNX    | p.V1695L | pecanex homolog (Dros     | 34 (0.00)  | 46 (0.17)  | 0.46 |
| 12-03 | Gp4 Focus 1 | g.chr9:78936393T>C  | Missense Mutation | PCSK5   | p.C1287R | proprotein convertase st  | 115 (0.00) | 63 (0.14)  | 0.38 |
| 12-03 | Gp4 Focus 1 | g.chr3:57542947C>A  | Missense Mutation | PDE12   | p.H281N  | phosphodiesterase 12      | 40 (0.00)  | 182 (0.14) | 0.38 |
| 12-03 | Gp4 Focus 1 | g.chr3:57542959T>C  | Missense Mutation | PDE12   | p.Y285H  | phosphodiesterase 12      | 45 (0.00)  | 174 (0.26) | 0.69 |
| 12-03 | Gp4 Focus 1 | g.chr19:10577584G>A | Missense Mutation | PDE4A   | p.V650M  | phosphodiesterase 4A, c   | 75 (0.00)  | 89 (0.11)  | 0.40 |
| 12-03 | Gp4 Focus 1 | g.chr8:17486174G>A  | Silent            | PDGFRL  | p.K228K  | platelet-derived growth   | 86 (0.00)  | 64 (0.47)  | 1.25 |
| 12-03 | Gp4 Focus 1 | g.chr8:17486175C>A  | Silent            | PDGFRL  | p.R229R  | platelet-derived growth   | 87 (0.00)  | 66 (0.39)  | 1.05 |
| 12-03 | Gp4 Focus 1 | g.chr1:161070520C>G | Missense Mutation | PFDN2   | p.E140Q  | prefoldin subunit 2       | 21 (0.00)  | 20 (0.85)  | 1.68 |
| 12-03 | Gp4 Focus 1 | g.chr3:48573745G>T  | Missense Mutation | PFKFB4  | p.L262I  | 6-phosphofructo-2-kina    | 33 (0.00)  | 150 (0.36) | 1.21 |
| 12-03 | Gp4 Focus 1 | g.chr12:48536630G>T | Missense Mutation | PFKM    | p.M573I  | phosphofructokinase, m    | 61 (0.00)  | 33 (0.27)  | 0.73 |
| 12-03 | Gp4 Focus 1 | g.chr15:99512839G>A | Silent            | PGPEP1L | p.I8I    | pyroglutamyl-peptidase    | 16 (0.00)  | 98 (0.16)  | 0.44 |
| 12-03 | Gp4 Focus 1 | g.chr3:169847257G>C | Missense Mutation | PHC3    | p.H335D  | polyhomeotic homolog      | 140 (0.00) | 218 (0.44) | 1.16 |
| 12-03 | Gp4 Focus 1 | g.chr9:96416762C>A  | Missense Mutation | PHF2    | p.S286Y  | PHD finger protein 2      | 64 (0.00)  | 57 (0.12)  | 0.41 |

|       |             |                      |                   |           |          |                          |             |            |      |
|-------|-------------|----------------------|-------------------|-----------|----------|--------------------------|-------------|------------|------|
| 12-03 | Gp4 Focus 1 | g.chr18:60408951C>T  | Intron            | PHLPP1    |          | PH domain and leucine    | 103 (0.00)  | 20 (0.60)  | 1.60 |
| 12-03 | Gp4 Focus 1 | g.chr18:60450726G>T  | Intron            | PHLPP1    |          | PH domain and leucine    | 62 (0.00)   | 39 (0.23)  | 0.62 |
| 12-03 | Gp4 Focus 1 | g.chr18:60465436G>A  | Intron            | PHLPP1    |          | PH domain and leucine    | 30 (0.00)   | 15 (0.47)  | 1.24 |
| 12-03 | Gp4 Focus 1 | g.chr18:60470023G>A  | Intron            | PHLPP1    |          | PH domain and leucine    | 39 (0.00)   | 44 (0.73)  | 1.94 |
| 12-03 | Gp4 Focus 1 | g.chr18:60571436G>A  | Intron            | PHLPP1    |          | PH domain and leucine    | 40 (0.00)   | 25 (0.40)  | 1.07 |
| 12-03 | Gp4 Focus 1 | g.chr18:60609947C>T  | Intron            | PHLPP1    |          | PH domain and leucine    | 60 (0.00)   | 49 (0.57)  | 1.52 |
| 12-03 | Gp4 Focus 1 | g.chr16:71683836C>G  | Missense Mutation | PHLPP2    | p.D910H  | PH domain and leucine    | 52 (0.00)   | 20 (0.70)  | 1.87 |
| 12-03 | Gp4 Focus 1 | g.chr16:71688544C>T  | Intron            | PHLPP2    |          | PH domain and leucine    | 31 (0.00)   | 57 (0.91)  | 2.43 |
| 12-03 | Gp4 Focus 1 | g.chr16:71689764T>A  | Intron            | PHLPP2    |          | PH domain and leucine    | 85 (0.00)   | 21 (0.38)  | 1.02 |
| 12-03 | Gp4 Focus 1 | g.chr16:71704259G>A  | Intron            | PHLPP2    |          | PH domain and leucine    | 76 (0.00)   | 68 (0.16)  | 0.43 |
| 12-03 | Gp4 Focus 1 | g.chr16:71734915G>A  | Intron            | PHLPP2    |          | PH domain and leucine    | 81 (0.00)   | 29 (0.66)  | 1.75 |
| 12-03 | Gp4 Focus 1 | g.chr16:71736150C>A  | Intron            | PHLPP2    |          | PH domain and leucine    | 23 (0.00)   | 14 (0.57)  | 1.52 |
| 12-03 | Gp4 Focus 1 | g.chr22:21097030G>A  | Missense Mutation | PI4KA     | p.S1160L | phosphatidylinositol 4-k | 52 (0.00)   | 25 (0.72)  | 2.44 |
| 12-03 | Gp4 Focus 1 | g.chr22:21174007G>A  | Silent            | PI4KA     | p.I237I  | phosphatidylinositol 4-k | 35 (0.00)   | 74 (0.61)  | 2.06 |
| 12-03 | Gp4 Focus 1 | g.chr4:517287C>T     | Missense Mutation | PIGG      | p.L544F  | phosphatidylinositol gly | 77 (0.00)   | 90 (0.38)  | 1.01 |
| 12-03 | Gp4 Focus 1 | g.chr7:106508258G>A  | Silent            | PIK3CG    | p.A84A   | phosphatidylinositol-4,5 | 19 (0.00)   | 31 (0.26)  | 0.69 |
| 12-03 | Gp4 Focus 1 | g.chr10:95720995A>G  | RNA               | PIPSL     |          | PIP5K1A and PSMD4-1      | 123 (0.00)  | 45 (0.27)  | 0.71 |
| 12-03 | Gp4 Focus 1 | g.chr8:22168777T>A   | Silent            | PIWIL2    | p.T651T  | piwi-like RNA-mediate    | 24 (0.00)   | 43 (0.33)  | 0.41 |
| 12-03 | Gp4 Focus 1 | g.chr16:71976451C>T  | RNA               | PKD1L3    |          | polycystic kidney diseas | 111 (0.00)  | 22 (0.32)  | 0.85 |
| 12-03 | Gp4 Focus 1 | g.chr22:46655725C>T  | Silent            | PKDREJ    | p.V1165V | polycystin (PKD) family  | 68 (0.01)   | 107 (0.57) | 1.92 |
| 12-03 | Gp4 Focus 1 | g.chr12:33031236C>A  | Missense Mutation | PKP2      | p.R193I  | plakophilin 2            | 25 (0.00)   | 57 (0.18)  | 0.47 |
| 12-03 | Gp4 Focus 1 | g.chr16:68293272G>T  | Silent            | PLA2G15   | p.L223L  | phospholipase A2, grou   | 60 (0.00)   | 205 (0.20) | 0.68 |
| 12-03 | Gp4 Focus 1 | g.chr9:26925891G>T   | Silent            | PLAA      | p.I267I  | phospholipase A2-activ   | 38 (0.00)   | 47 (0.34)  | 0.91 |
| 12-03 | Gp4 Focus 1 | g.chr20:9400537C>T   | Missense Mutation | PLCB4     | p.A700V  | phospholipase C, beta    | 4 59 (0.00) | 42 (0.98)  | 2.60 |
| 12-03 | Gp4 Focus 1 | g.chr17:62811087G>T  | RNA               | PLEKHM1P  |          | pleckstrin homology do   | 20 (0.00)   | 22 (0.45)  | 1.21 |
| 12-03 | Gp4 Focus 1 | g.chr17:62818531G>A  | RNA               | PLEKHM1P  |          | pleckstrin homology do   | 21 (0.00)   | 88 (0.34)  | 0.91 |
| 12-03 | Gp4 Focus 1 | g.chr10:115540460C>T | Silent            | PLEKHS1   | p.L173L  | pleckstrin homology do   | 46 (0.00)   | 48 (0.19)  | 0.50 |
| 12-03 | Gp4 Focus 1 | g.chr16:23690575C>T  | Missense Mutation | PLK1      | p.L108F  | polo-like kinase 1       | 16 (0.00)   | 107 (0.32) | 0.85 |
| 12-03 | Gp4 Focus 1 | g.chr7:75144122T>A   | RNA               | PMS2P3    |          | postmeiotic segregation  | 19 (0.00)   | 37 (0.19)  | 0.50 |
| 12-03 | Gp4 Focus 1 | g.chr22:44340662C>T  | Missense Mutation | PNPLA3    | p.L402F  | patatin-like phospholipa | 62 (0.00)   | 40 (0.23)  | 0.76 |
| 12-03 | Gp4 Focus 1 | g.chr6:43582225C>T   | Silent            | POLH      | p.C691C  | polymerase (DNA direc    | 29 (0.00)   | 21 (0.62)  | 1.65 |
| 12-03 | Gp4 Focus 1 | g.chr1:145608420G>A  | Silent            | POLR3C    | p.L129L  | polymerase (RNA) III     | 190 (0.00)  | 16 (0.50)  | 1.33 |
| 12-03 | Gp4 Focus 1 | g.chr22:24656894G>T  | RNA               | POM121L9P |          | POM121 transmembran      | 32 (0.00)   | 102 (0.13) | 0.43 |
| 12-03 | Gp4 Focus 1 | g.chr18:14542675G>T  | Silent            | POTEC     | p.L157L  | POTE ankyrin domain f    | 96 (0.00)   | 69 (0.23)  | 0.62 |
| 12-03 | Gp4 Focus 1 | g.chr2:130832635G>T  | Missense Mutation | POTEF     | p.L804M  | POTE ankyrin domain f    | 73 (0.00)   | 248 (0.20) | 0.72 |

|       |             |                      |                   |          |          |                                                     |            |      |
|-------|-------------|----------------------|-------------------|----------|----------|-----------------------------------------------------|------------|------|
| 12-03 | Gp4 Focus 1 | g.chr5:93076939G>A   | Missense Mutation | POU5F2   | p.P111S  | POU domain class 5, tra39 (0.00)                    | 147 (0.18) | 0.49 |
| 12-03 | Gp4 Focus 1 | g.chr19:287744G>T    | Missense Mutation | PPAP2C   | p.A71D   | phosphatidic acid phosphatase 28 (0.00)             | 469 (0.15) | 0.39 |
| 12-03 | Gp4 Focus 1 | g.chr12:81657080G>A  | Silent            | PPFIA2   | p.S1215S | protein tyrosine phosphatase 26 (0.00)              | 18 (0.39)  | 1.04 |
| 12-03 | Gp4 Focus 1 | g.chr12:80199415C>A  | Missense Mutation | PPP1R12A | p.A653S  | protein phosphatase 1, regulatory subunit 63 (0.00) | 14 (0.71)  | 1.90 |
| 12-03 | Gp4 Focus 1 | g.chr12:80199417G>A  | Missense Mutation | PPP1R12A | p.T652I  | protein phosphatase 1, regulatory subunit 63 (0.00) | 14 (0.71)  | 1.90 |
| 12-03 | Gp4 Focus 1 | g.chr19:49377782C>T  | Missense Mutation | PPP1R15A | p.A431V  | protein phosphatase 1, regulatory subunit 49 (0.00) | 67 (0.12)  | 0.43 |
| 12-03 | Gp4 Focus 1 | g.chr11:61254629G>A  | Silent            | PPP1R32  | p.G320G  | protein phosphatase 1, regulatory subunit 18 (0.00) | 75 (0.29)  | 0.62 |
| 12-03 | Gp4 Focus 1 | g.chr19:52722972C>T  | Missense Mutation | PPP2R1A  | p.S386F  | protein phosphatase 2, regulatory subunit 59 (0.00) | 61 (0.51)  | 1.82 |
| 12-03 | Gp4 Focus 1 | g.chr5:145972568C>T  | Missense Mutation | PPP2R2B  | p.D340N  | protein phosphatase 2, regulatory subunit 57 (0.00) | 32 (0.72)  | 1.92 |
| 12-03 | Gp4 Focus 1 | g.chr9:127920549C>T  | Missense Mutation | PPP6C    | p.R117K  | protein phosphatase 6, catalytic subunit 37 (0.00)  | 32 (0.53)  | 1.42 |
| 12-03 | Gp4 Focus 1 | g.chr1:12835759G>T   | Missense Mutation | PRAMEF12 | p.A121S  | PRAME family member 144 (0.00)                      | 27 (0.67)  | 1.78 |
| 12-03 | Gp4 Focus 1 | g.chr1:12942131C>T   | Missense Mutation | PRAMEF4  | p.C140Y  | PRAME family member 70 (0.01)                       | 36 (0.42)  | 1.11 |
| 12-03 | Gp4 Focus 1 | g.chr1:14109327G>A   | Splice Site       | PRDM2    |          | PR domain containing 273 (0.00)                     | 72 (0.42)  | 1.11 |
| 12-03 | Gp4 Focus 1 | g.chr10:120934040G>A | Silent            | PRDX3    | p.V78V   | peroxiredoxin 3 (0.03)                              | 16 (0.31)  | 0.83 |
| 12-03 | Gp4 Focus 1 | g.chr19:54403952C>T  | Silent            | PRKCG    | p.P508P  | protein kinase C, gamma (0.00)                      | 45 (0.24)  | 0.87 |
| 12-03 | Gp4 Focus 1 | g.chr14:75330470G>A  | Missense Mutation | PROX2    | p.T23M   | prospero homeobox 2 (0.00)                          | 41 (0.20)  | 0.52 |
| 12-03 | Gp4 Focus 1 | g.chr1:150318933G>A  | Silent            | PRPF3    | p.K603K  | pre-mRNA processing factor 19 (0.00)                | 24 (0.83)  | 3.12 |
| 12-03 | Gp4 Focus 1 | g.chr17:1563726C>T   | Splice Site       | PRPF8    | p.Q1595Q | pre-mRNA processing factor 63 (0.00)                | 19 (0.74)  | 1.96 |
| 12-03 | Gp4 Focus 1 | g.chr17:1586909G>T   | Missense Mutation | PRPF8    | p.P63T   | pre-mRNA processing factor 36 (0.03)                | 77 (0.25)  | 0.66 |
| 12-03 | Gp4 Focus 1 | g.chrX:106884137G>T  | Silent            | PRPS1    | p.R104R  | phosphoribosyl pyrophosphatase 47 (0.00)            | 69 (0.49)  | 0.82 |
| 12-03 | Gp4 Focus 1 | g.chr22:32081569C>T  | Missense Mutation | PRR14L   | p.E2134K | proline rich 14-like protein 20 (0.00)              | 55 (0.25)  | 0.68 |
| 12-03 | Gp4 Focus 1 | g.chr15:55931897G>A  | Missense Mutation | PRTG     | p.T756I  | protogenin (0.00)                                   | 11 (0.64)  | 1.70 |
| 12-03 | Gp4 Focus 1 | g.chr19:43528951G>A  | Silent            | PSG11    | p.L108L  | pregnancy specific beta-16 (0.00)                   | 10 (0.50)  | 1.33 |
| 12-03 | Gp4 Focus 1 | g.chr19:43680297T>A  | Missense Mutation | PSG5     | p.K238M  | pregnancy specific beta-19 (0.00)                   | 16 (0.69)  | 1.83 |
| 12-03 | Gp4 Focus 1 | g.chr19:43766063G>A  | Missense Mutation | PSG9     | p.R220W  | pregnancy specific beta-190 (0.01)                  | 12 (0.83)  | 2.22 |
| 12-03 | Gp4 Focus 1 | g.chr14:23511437G>A  | Start Codon SNP   | PSMB11   | p.M1I    | proteasome (prosome), subunit 17 (0.00)             | 100 (0.34) | 0.65 |
| 12-03 | Gp4 Focus 1 | g.chr2:231937101G>T  | Missense Mutation | PSMD1    | p.G285C  | proteasome (prosome), subunit 66 (0.00)             | 25 (0.24)  | 0.64 |
| 12-03 | Gp4 Focus 1 | g.chr2:120567493C>T  | Nonsense Mutation | PTPN4    | p.R22*   | protein tyrosine phosphatase 31 (0.00)              | 17 (0.59)  | 1.57 |
| 12-03 | Gp4 Focus 1 | g.chr1:44084308G>C   | Missense Mutation | PTPRF    | p.C1451S | protein tyrosine phosphatase 80 (0.00)              | 181 (0.23) | 0.62 |
| 12-03 | Gp4 Focus 1 | g.chr1:31414856G>A   | Nonsense Mutation | PUM1     | p.Q1035* | pumilio RNA-binding factor 33 (0.00)                | 65 (0.38)  | 1.03 |
| 12-03 | Gp4 Focus 1 | g.chr2:1653251C>T    | Silent            | PXDN     | p.L767L  | peroxidase homolog (D18) (0.00)                     | 83 (0.20)  | 0.55 |
| 12-03 | Gp4 Focus 1 | g.chr20:25271166C>A  | Missense Mutation | PYGB     | p.S626Y  | phosphorylase, glycogen phosphorylase 82 (0.00)     | 155 (0.34) | 0.89 |
| 12-03 | Gp4 Focus 1 | g.chr20:25271188T>A  | Missense Mutation | PYGB     | p.H633Q  | phosphorylase, glycogen phosphorylase 88 (0.00)     | 166 (0.30) | 0.79 |
| 12-03 | Gp4 Focus 1 | g.chr12:9317761G>A   | Silent            | PZP      | p.L821L  | pregnancy-zone protein 53 (0.00)                    | 16 (0.75)  | 2.00 |
| 12-03 | Gp4 Focus 1 | g.chr3:49094494G>A   | Missense Mutation | QRICH1   | p.A380V  | glutamine-rich 1 (0.00)                             | 63 (0.40)  | 1.06 |

|       |             |                      |                   |                 |         |                                     |            |      |
|-------|-------------|----------------------|-------------------|-----------------|---------|-------------------------------------|------------|------|
| 12-03 | Gp4 Focus 1 | g.chr19:10812626G>A  | Splice Site       | QTRT1           | p.G82R  | queuine tRNA-ribosyltr:41 (0.00)    | 461 (0.13) | 0.47 |
| 12-03 | Gp4 Focus 1 | g.chr13:111176219C>G | Missense Mutation | RAB20           | p.M166I | RAB20, member RAS c42 (0.00)        | 18 (0.50)  | 1.33 |
| 12-03 | Gp4 Focus 1 | g.chr1:46740280G>A   | Missense Mutation | RAD54L          | p.R587Q | RAD54-like (S. cerevisi25 (0.00)    | 19 (0.74)  | 1.96 |
| 12-03 | Gp4 Focus 1 | g.chr1:46740321G>A   | Missense Mutation | RAD54L          | p.E601K | RAD54-like (S. cerevisi29 (0.00)    | 38 (0.79)  | 2.11 |
| 12-03 | Gp4 Focus 1 | g.chr5:34824438G>A   | Missense Mutation | RAI14           | p.V831M | retinoic acid induced 14 51 (0.00)  | 25 (0.20)  | 0.53 |
| 12-03 | Gp4 Focus 1 | g.chrX:17819626G>T   | Missense Mutation | RAI2            | p.L169M | retinoic acid induced 2 20 (0.00)   | 101 (0.29) | 0.48 |
| 12-03 | Gp4 Focus 1 | g.chr7:45222938T>C   | Missense Mutation | RAMP3           | p.I125T | receptor (G protein-coupl43 (0.02)  | 70 (0.27)  | 0.72 |
| 12-03 | Gp4 Focus 1 | g.chr4:53730645G>A   | Splice Site       | RASL11B         | p.G67D  | RAS-like, family 11, me55 (0.00)    | 92 (0.26)  | 0.70 |
| 12-03 | Gp4 Focus 1 | g.chr1:205065957C>T  | Missense Mutation | RBBP5           | p.G417S | retinoblastoma binding j 118 (0.00) | 67 (0.94)  | 2.51 |
| 12-03 | Gp4 Focus 1 | g.chr1:110883009G>A  | Missense Mutation | RBM15           | p.E328K | RNA binding motif prot44 (0.00)     | 136 (0.15) | 0.39 |
| 12-03 | Gp4 Focus 1 | g.chr1:110883011G>A  | Silent            | RBM15           | p.E328E | RNA binding motif prot44 (0.00)     | 136 (0.15) | 0.39 |
| 12-03 | Gp4 Focus 1 | g.chr1:89449327G>A   | Silent            | RBMXL1          | p.D61D  | RNA binding motif prot 122 (0.00)   | 155 (0.66) | 1.77 |
| 12-03 | Gp4 Focus 1 | g.chr7:73663425G>A   | Silent            | RFC2            | p.T83T  | replication factor C (acti22 (0.00) | 23 (0.91)  | 2.43 |
| 12-03 | Gp4 Focus 1 | g.chr3:53155717G>A   | Nonsense Mutation | RFT1            | p.Q147* | RFT1 homolog (S. cerev37 (0.00)     | 33 (0.48)  | 1.29 |
| 12-03 | Gp4 Focus 1 | g.chr1:163117172C>A  | Missense Mutation | RGS5            | p.R173L | regulator of G-protein si 18 (0.00) | 15 (0.33)  | 0.89 |
| 12-03 | Gp4 Focus 1 | g.chr3:129247680G>T  | Missense Mutation | RHO             | p.W35L  | rhodopsin 34 (0.00)                 | 145 (0.18) | 0.48 |
| 12-03 | Gp4 Focus 1 | g.chr3:129247693G>T  | Missense Mutation | RHO             | p.M39I  | rhodopsin 34 (0.00)                 | 147 (0.20) | 0.53 |
| 12-03 | Gp4 Focus 1 | g.chr18:40503578C>A  | Missense Mutation | RIT2            | p.V129L | Ras-like without CAAX 155 (0.00)    | 168 (0.56) | 1.49 |
| 12-03 | Gp4 Focus 1 | g.chr15:41043663G>T  | Missense Mutation | RMDN3           | p.S162Y | regulator of microtubule 105 (0.00) | 209 (0.16) | 0.43 |
| 12-03 | Gp4 Focus 1 | g.chr15:59350599G>C  | Missense Mutation | RNF111          | p.A406P | ring finger protein 111 95 (0.00)   | 44 (0.32)  | 0.85 |
| 12-03 | Gp4 Focus 1 | g.chr9:104323206A>T  | Nonsense Mutation | RNF20           | p.K836* | ring finger protein 20, E 17 (0.00) | 15 (0.87)  | 2.31 |
| 12-03 | Gp4 Focus 1 | g.chr1:45115368C>T   | Missense Mutation | RNF220          | p.A494V | ring finger protein 220 42 (0.00)   | 257 (0.51) | 1.36 |
| 12-03 | Gp4 Focus 1 | g.chr6:19613423C>A   | RNA               | RP1-167F1.2     |         | 31 (0.00)                           | 43 (0.28)  | 0.74 |
| 12-03 | Gp4 Focus 1 | g.chr17:33900732C>A  | lincRNA           | RP11-1094M14.11 |         | 25 (0.00)                           | 18 (0.33)  | 0.89 |
| 12-03 | Gp4 Focus 1 | g.chr12:112193492C>A | Missense Mutation | RP11-162P23.1   | p.P16Q  | 24 (0.00)                           | 32 (0.22)  | 0.58 |
| 12-03 | Gp4 Focus 1 | g.chr1:63166544G>T   | RNA               | RP11-230B22.1   |         | 20 (0.00)                           | 24 (0.25)  | 0.67 |
| 12-03 | Gp4 Focus 1 | g.chr17:29374256G>T  | RNA               | RP11-271K11.5   |         | 24 (0.00)                           | 72 (0.46)  | 1.52 |
| 12-03 | Gp4 Focus 1 | g.chr1:208050348C>T  | lincRNA           | RP11-328D5.1    |         | 61 (0.00)                           | 107 (0.20) | 0.52 |
| 12-03 | Gp4 Focus 1 | g.chr16:69362952G>A  | Missense Mutation | RP11-343C2.1    | p.T161M | 55 (0.00)                           | 106 (0.42) | 1.45 |
| 12-03 | Gp4 Focus 1 | g.chr12:25956393G>C  | lincRNA           | RP11-443N24.2   |         | 34 (0.00)                           | 25 (0.60)  | 1.60 |
| 12-03 | Gp4 Focus 1 | g.chr5:162843665C>T  | RNA               | RP11-541P9.3    |         | 53 (0.00)                           | 20 (0.35)  | 0.93 |
| 12-03 | Gp4 Focus 1 | g.chr17:44999734G>A  | lincRNA           | RP11-63A1.1     |         | 15 (0.00)                           | 34 (0.32)  | 1.17 |
| 12-03 | Gp4 Focus 1 | g.chr17:33734633C>A  | RNA               | RP11-686D22.8   |         | 91 (0.00)                           | 78 (0.67)  | 1.78 |
| 12-03 | Gp4 Focus 1 | g.chr12:53928314G>A  | Nonsense Mutation | RP11-793H13     | p.Q178* | 65 (0.00)                           | 23 (0.52)  | 1.39 |
| 12-03 | Gp4 Focus 1 | g.chr17:43627128G>A  | lincRNA           | RP11-798G7.6    |         | 142 (0.00)                          | 84 (0.13)  | 0.47 |

|       |             |                      |                   |         |          |                                     |            |      |
|-------|-------------|----------------------|-------------------|---------|----------|-------------------------------------|------------|------|
| 12-03 | Gp4 Focus 1 | g.chr14:21771516C>A  | Missense Mutation | RPGRIP1 | p.S205Y  | retinitis pigmentosa GTI54 (0.00)   | 66 (0.21)  | 0.57 |
| 12-03 | Gp4 Focus 1 | g.chr12:113325607C>T | Missense Mutation | RPH3A   | p.S481F  | rabphilin 3A 73 (0.00)              | 42 (0.14)  | 0.38 |
| 12-03 | Gp4 Focus 1 | g.chr12:113325681C>A | Missense Mutation | RPH3A   | p.P506T  | rabphilin 3A 94 (0.01)              | 48 (0.46)  | 1.22 |
| 12-03 | Gp4 Focus 1 | g.chr8:74204608T>C   | Silent            | RPL7    | p.E12E   | ribosomal protein L7 45 (0.00)      | 103 (0.19) | 0.52 |
| 12-03 | Gp4 Focus 1 | g.chr6:166914390G>A  | Missense Mutation | RPS6KA2 | p.H108Y  | ribosomal protein S6 kir55 (0.00)   | 122 (0.23) | 0.61 |
| 12-03 | Gp4 Focus 1 | g.chr1:213277836T>A  | Nonsense Mutation | RPS6KC1 | p.C89*   | ribosomal protein S6 kir135 (0.00)  | 71 (0.21)  | 0.56 |
| 12-03 | Gp4 Focus 1 | g.chr1:213414501C>T  | Missense Mutation | RPS6KC1 | p.P549L  | ribosomal protein S6 kir27 (0.00)   | 24 (0.67)  | 1.78 |
| 12-03 | Gp4 Focus 1 | g.chr15:41770789C>T  | Missense Mutation | RTF1    | p.T595I  | Rtf1, Paf1/RNA polyme 136 (0.00)    | 69 (0.19)  | 0.50 |
| 12-03 | Gp4 Focus 1 | g.chr2:74659599G>C   | Missense Mutation | RTKN    | p.S52R   | rhotekin 20 (0.00)                  | 249 (0.19) | 0.51 |
| 12-03 | Gp4 Focus 1 | g.chr3:72434375C>T   | Intron            | RYBP    |          | RING1 and YY1 bindin 131 (0.00)     | 31 (0.29)  | 0.77 |
| 12-03 | Gp4 Focus 1 | g.chr3:72453168C>T   | Intron            | RYBP    |          | RING1 and YY1 bindin 107 (0.00)     | 20 (0.30)  | 0.80 |
| 12-03 | Gp4 Focus 1 | g.chr3:72455355C>T   | Intron            | RYBP    |          | RING1 and YY1 bindin 48 (0.00)      | 18 (0.83)  | 2.22 |
| 12-03 | Gp4 Focus 1 | g.chr3:72455365A>G   | Intron            | RYBP    |          | RING1 and YY1 bindin 50 (0.00)      | 19 (0.84)  | 2.25 |
| 12-03 | Gp4 Focus 1 | g.chr19:38939145C>A  | Silent            | RYR1    | p.I317I  | ryanodine receptor 1 (sk40 (0.00)   | 259 (0.11) | 0.39 |
| 12-03 | Gp4 Focus 1 | g.chr19:39070675C>T  | Silent            | RYR1    | p.N4806N | ryanodine receptor 1 (sk21 (0.00)   | 87 (0.20)  | 0.71 |
| 12-03 | Gp4 Focus 1 | g.chr15:33993194G>A  | Silent            | RYR3    | p.R2132R | ryanodine receptor 3 51 (0.00)      | 22 (0.27)  | 0.73 |
| 12-03 | Gp4 Focus 1 | g.chr11:18111040C>A  | Missense Mutation | SAAL1   | p.V203L  | serum amyloid A-like 1 22 (0.00)    | 30 (0.23)  | 0.62 |
| 12-03 | Gp4 Focus 1 | g.chr13:23929005T>C  | Silent            | SACS    | p.E582E  | sacsin molecular chaper 20 (0.00)   | 78 (0.21)  | 0.55 |
| 12-03 | Gp4 Focus 1 | g.chr19:5621407C>A   | Splice Site       | SAFB2   | p.A63S   | scaffold attachment fact 155 (0.00) | 226 (0.16) | 0.61 |
| 12-03 | Gp4 Focus 1 | g.chr20:50408754G>A  | Missense Mutation | SALL4   | p.H90Y   | spalt-like transcription f48 (0.00) | 134 (0.28) | 0.76 |
| 12-03 | Gp4 Focus 1 | g.chr11:65744512G>T  | Missense Mutation | SART1   | p.D629Y  | squamous cell carcinom 18 (0.00)    | 156 (0.20) | 0.69 |
| 12-03 | Gp4 Focus 1 | g.chr5:147261112G>A  | Silent            | SCGB3A2 | p.L53L   | secretoglobin, family 3A61 (0.00)   | 26 (0.19)  | 0.51 |
| 12-03 | Gp4 Focus 1 | g.chr17:62020383C>A  | Missense Mutation | SCN4A   | p.C1364F | sodium channel, voltage26 (0.00)    | 38 (0.79)  | 2.11 |
| 12-03 | Gp4 Focus 1 | g.chr11:118015813G>A | Missense Mutation | SCN4B   | p.H65Y   | sodium channel, voltage84 (0.00)    | 223 (0.19) | 0.51 |
| 12-03 | Gp4 Focus 1 | g.chr4:76878762G>T   | Missense Mutation | SDAD1   | p.R560S  | SDA1 domain containin 114 (0.00)    | 114 (0.39) | 1.03 |
| 12-03 | Gp4 Focus 1 | g.chr3:195690315G>A  | RNA               | SDHAP1  |          | succinate dehydrogenas 107 (0.01)   | 12 (0.42)  | 1.11 |
| 12-03 | Gp4 Focus 1 | g.chr7:4167045G>A    | Missense Mutation | SDK1    | p.E1286K | sidekick cell adhesion r 109 (0.00) | 36 (0.17)  | 0.63 |
| 12-03 | Gp4 Focus 1 | g.chr17:71418491G>T  | Silent            | SDK2    | p.S660S  | sidekick cell adhesion r 17 (0.00)  | 86 (0.33)  | 0.87 |
| 12-03 | Gp4 Focus 1 | g.chr17:75208031G>A  | Splice Site       | SEC14L1 |          | SEC14-like 1 (S. cerevis 24 (0.00)  | 79 (0.35)  | 1.24 |
| 12-03 | Gp4 Focus 1 | g.chr2:97530468G>A   | Silent            | SEMA4C  | p.T312T  | sema domain, immunog 28 (0.00)      | 404 (0.14) | 0.38 |
| 12-03 | Gp4 Focus 1 | g.chr5:115813763G>A  | Silent            | SEMA6A  | p.T505T  | sema domain, transmem 69 (0.00)     | 114 (0.18) | 0.49 |
| 12-03 | Gp4 Focus 1 | g.chr20:43836077C>A  | Missense Mutation | SEMG1   | p.H47N   | semenogelin I 22 (0.00)             | 47 (0.21)  | 0.57 |
| 12-03 | Gp4 Focus 1 | g.chr4:77926819C>A   | Missense Mutation | SEPT11  | p.P70T   | septin 11 39 (0.00)                 | 75 (0.47)  | 1.24 |
| 12-03 | Gp4 Focus 1 | g.chr7:55874853C>A   | Nonsense Mutation | SEPT14  | p.E306*  | septin 14 19 (0.00)                 | 62 (0.40)  | 1.08 |
| 12-03 | Gp4 Focus 1 | g.chr17:56598158G>A  | Silent            | SEPT4   | p.V441V  | septin 4 59 (0.00)                  | 11 (0.73)  | 1.94 |



|       |             |                      |                   |          |          |                            |            |            |      |
|-------|-------------|----------------------|-------------------|----------|----------|----------------------------|------------|------------|------|
| 12-03 | Gp4 Focus 1 | g.chr6:158535948A>G  | Silent            | SERAC1   | p.T519T  | serine active site contain | 64 (0.00)  | 34 (0.15)  | 0.39 |
| 12-03 | Gp4 Focus 1 | g.chr6:2838147G>T    | Silent            | SERPINB1 | p.T131T  | serpin peptidase inhibitor | 66 (0.00)  | 33 (0.76)  | 2.02 |
| 12-03 | Gp4 Focus 1 | g.chr6:2840702G>T    | Missense Mutation | SERPINB1 | p.A40D   | serpin peptidase inhibitor | 42 (0.00)  | 29 (0.52)  | 1.38 |
| 12-03 | Gp4 Focus 1 | g.chr12:132198708C>G | Missense Mutation | SFSWAP   | p.A104G  | splicing factor, suppress  | 28 (0.00)  | 19 (0.47)  | 1.26 |
| 12-03 | Gp4 Focus 1 | g.chr12:132250696C>A | Missense Mutation | SFSWAP   | p.A662D  | splicing factor, suppress  | 59 (0.00)  | 47 (0.28)  | 0.74 |
| 12-03 | Gp4 Focus 1 | g.chr10:81318721C>G  | Silent            | SFTPA2   | p.G71G   | surfactant protein A2      | 67 (0.00)  | 91 (0.14)  | 0.38 |
| 12-03 | Gp4 Focus 1 | g.chr2:201399842T>A  | Missense Mutation | SGOL2    | p.V86E   | shugoshin-like 2 (S. pon   | 24 (0.00)  | 24 (0.21)  | 0.56 |
| 12-03 | Gp4 Focus 1 | g.chr3:72808324A>T   | Intron            | SHQ1     |          | SHQ1, H/ACA ribonucleo     | 46 (0.00)  | 14 (0.50)  | 1.33 |
| 12-03 | Gp4 Focus 1 | g.chr5:132160315G>C  | Silent            | SHROOM1  | p.P411P  | shroom family member       | 23 (0.00)  | 156 (0.74) | 1.97 |
| 12-03 | Gp4 Focus 1 | g.chr10:69672462C>A  | Missense Mutation | SIRT1    | p.T530K  | sirtuin 1                  | 19 (0.00)  | 15 (0.53)  | 1.42 |
| 12-03 | Gp4 Focus 1 | g.chr16:67995559G>C  | Silent            | SLC12A4  | p.V87V   | solute carrier family 12   | 31 (0.00)  | 55 (0.18)  | 0.62 |
| 12-03 | Gp4 Focus 1 | g.chr17:6604348G>A   | Missense Mutation | SLC13A5  | p.L272F  | solute carrier family 13   | 36 (0.00)  | 103 (0.15) | 0.39 |
| 12-03 | Gp4 Focus 1 | g.chr17:73102001C>A  | Missense Mutation | SLC16A5  | p.P464Q  | solute carrier family 16   | 60 (0.00)  | 48 (0.40)  | 1.39 |
| 12-03 | Gp4 Focus 1 | g.chr2:113417313A>G  | Silent            | SLC20A1  | p.S527S  | solute carrier family 20   | 55 (0.00)  | 51 (0.22)  | 0.58 |
| 12-03 | Gp4 Focus 1 | g.chr1:116577928C>T  | Silent            | SLC22A15 | p.I355I  | solute carrier family 22,  | 52 (0.00)  | 20 (0.50)  | 1.33 |
| 12-03 | Gp4 Focus 1 | g.chr15:65945063C>A  | Silent            | SLC24A1  | p.T959T  | solute carrier family 24   | 37 (0.00)  | 47 (0.49)  | 1.30 |
| 12-03 | Gp4 Focus 1 | g.chr15:65946276G>A  | Silent            | SLC24A1  | p.L1023L | solute carrier family 24   | 19 (0.00)  | 18 (0.56)  | 1.48 |
| 12-03 | Gp4 Focus 1 | g.chr2:172666785A>G  | Splice Site       | SLC25A12 | p.G391G  | solute carrier family 25   | 51 (0.00)  | 81 (0.20)  | 0.53 |
| 12-03 | Gp4 Focus 1 | g.chr15:45567706G>T  | Missense Mutation | SLC28A2  | p.A658S  | solute carrier family 28   | 134 (0.00) | 279 (0.18) | 0.48 |
| 12-03 | Gp4 Focus 1 | g.chr12:8075534G>A   | Silent            | SLC2A3   | p.P385P  | solute carrier family 2    | 124 (0.00) | 27 (0.78)  | 2.07 |
| 12-03 | Gp4 Focus 1 | g.chr17:70943976G>T  | Missense Mutation | SLC39A11 | p.N115K  | solute carrier family 39,  | 17 (0.00)  | 56 (0.46)  | 1.24 |
| 12-03 | Gp4 Focus 1 | g.chr1:75805298C>G   | Missense Mutation | SLC44A5  | p.D24H   | solute carrier family 44,  | 74 (0.00)  | 119 (0.24) | 0.63 |
| 12-03 | Gp4 Focus 1 | g.chr22:32630921G>C  | Missense Mutation | SLC5A4   | p.P275R  | solute carrier family 5    | 17 (0.00)  | 17 (0.41)  | 1.10 |
| 12-03 | Gp4 Focus 1 | g.chr5:1235753C>T    | Silent            | SLC6A18  | p.I199I  | solute carrier family 6    | 145 (0.00) | 134 (0.20) | 0.54 |
| 12-03 | Gp4 Focus 1 | g.chr2:40342737C>T   | Missense Mutation | SLC8A1   | p.D860N  | solute carrier family 8    | 35 (0.00)  | 12 (0.67)  | 1.78 |
| 12-03 | Gp4 Focus 1 | g.chr10:105727599C>A | Missense Mutation | SLK      | p.D32E   | STE20-like kinase          | 29 (0.00)  | 36 (0.19)  | 0.52 |
| 12-03 | Gp4 Focus 1 | g.chr16:3639022G>T   | Silent            | SLX4     | p.P1539P | SLX4 structure-specific    | 28 (0.00)  | 200 (0.11) | 0.38 |
| 12-03 | Gp4 Focus 1 | g.chr18:48557730G>A  | Intron            | SMAD4    |          | SMAD family member         | 92 (0.00)  | 125 (0.17) | 0.45 |
| 12-03 | Gp4 Focus 1 | g.chr19:11114048A>G  | Missense Mutation | SMARCA4  | p.E659G  | SWI/SNF related, matrix    | 43 (0.00)  | 39 (0.33)  | 1.18 |
| 12-03 | Gp4 Focus 1 | g.chr11:93212347C>A  | Missense Mutation | SMCO4    | p.Q3H    | single-pass membrane p     | 34 (0.00)  | 47 (0.21)  | 0.57 |
| 12-03 | Gp4 Focus 1 | g.chr17:2203145G>A   | Missense Mutation | SMG6     | p.T301I  | SMG6 nonsense mediator     | 25 (0.00)  | 22 (0.27)  | 0.73 |
| 12-03 | Gp4 Focus 1 | g.chr1:183514254C>T  | Missense Mutation | SMG7     | p.P726L  | SMG7 nonsense mediator     | 86 (0.00)  | 48 (0.21)  | 0.56 |
| 12-03 | Gp4 Focus 1 | g.chr17:57288584C>T  | Missense Mutation | SMG8     | p.S391F  | SMG8 nonsense mediator     | 43 (0.00)  | 62 (0.58)  | 2.07 |
| 12-03 | Gp4 Focus 1 | g.chr17:57290270G>A  | Missense Mutation | SMG8     | p.A696T  | SMG8 nonsense mediator     | 77 (0.00)  | 79 (0.11)  | 0.41 |
| 12-03 | Gp4 Focus 1 | g.chr7:128845061C>A  | Silent            | SMO      | p.I185I  | smoothed, frizzled class   | 32 (0.00)  | 84 (0.21)  | 0.57 |

|       |             |                      |                   |           |          |                                      |            |      |
|-------|-------------|----------------------|-------------------|-----------|----------|--------------------------------------|------------|------|
| 12-03 | Gp4 Focus 1 | g.chr12:54576234C>A  | Missense Mutation | SMUG1     | p.E153D  | single-strand-selective n24 (0.00)   | 170 (0.55) | 1.47 |
| 12-03 | Gp4 Focus 1 | g.chr17:62543863C>T  | Silent            | SMURF2    | p.R642R  | SMAD specific E3 ubiq 26 (0.00)      | 99 (0.27)  | 0.73 |
| 12-03 | Gp4 Focus 1 | g.chr1:151638475A>G  | Missense Mutation | SNX27     | p.S325G  | sorting nexin family me:57 (0.00)    | 41 (0.63)  | 1.69 |
| 12-03 | Gp4 Focus 1 | g.chr10:108380308G>C | Missense Mutation | SORCS1    | p.H892D  | sortilin-related VPS10 d25 (0.00)    | 12 (0.42)  | 1.11 |
| 12-03 | Gp4 Focus 1 | g.chr15:45357535C>T  | Silent            | SORD      | p.A164A  | sorbitol dehydrogenase 18 (0.00)     | 23 (0.30)  | 0.81 |
| 12-03 | Gp4 Focus 1 | g.chr4:77816747T>C   | Missense Mutation | SOWAHB    | p.I752M  | sosondawah ankyrin rep44 (0.00)      | 64 (0.59)  | 1.58 |
| 12-03 | Gp4 Focus 1 | g.chr12:53777045C>T  | Silent            | SP1       | p.L438L  | Sp1 transcription factor 49 (0.00)   | 85 (0.19)  | 0.50 |
| 12-03 | Gp4 Focus 1 | g.chr7:21469739C>T   | Missense Mutation | SP4       | p.S319F  | Sp4 transcription factor 32 (0.00)   | 68 (0.16)  | 0.43 |
| 12-03 | Gp4 Focus 1 | g.chr2:214794752G>A  | Missense Mutation | SPAG16    | p.C428Y  | sperm associated antigen 47 (0.00)   | 28 (0.39)  | 1.05 |
| 12-03 | Gp4 Focus 1 | g.chr1:84991757G>C   | RNA               | SPATA1    |          | spermatogenesis associa55 (0.00)     | 47 (0.15)  | 0.40 |
| 12-03 | Gp4 Focus 1 | g.chr9:65506533C>A   | Nonsense Mutation | SPATA31A7 | p.E343*  | SPATA31 subfamily A, 168 (0.00)      | 184 (0.55) | 1.46 |
| 12-03 | Gp4 Focus 1 | g.chr3:113184499C>T  | Splice Site       | SPICE1    |          | spindle and centriole ass30 (0.00)   | 29 (0.24)  | 0.64 |
| 12-03 | Gp4 Focus 1 | g.chr17:47707028G>A  | Intron            | SPOP      |          | speckle-type POZ protei42 (0.00)     | 34 (0.21)  | 0.55 |
| 12-03 | Gp4 Focus 1 | g.chr2:54873334C>T   | Missense Mutation | SPTBN1    | p.L1530F | spectrin, beta, non-eryth 129 (0.00) | 44 (0.18)  | 0.48 |
| 12-03 | Gp4 Focus 1 | g.chr19:41040238C>A  | Silent            | SPTBN4    | p.L1449L | spectrin, beta, non-eryth24 (0.00)   | 144 (0.12) | 0.46 |
| 12-03 | Gp4 Focus 1 | g.chr16:30733454G>T  | Missense Mutation | SRCAP     | p.V1185F | Snf2-related CREBBP a47 (0.00)       | 42 (0.21)  | 0.74 |
| 12-03 | Gp4 Focus 1 | g.chr17:17723759T>A  | Silent            | SREBF1    | p.A56A   | sterol regulatory elemen35 (0.00)    | 166 (0.71) | 1.90 |
| 12-03 | Gp4 Focus 1 | g.chr1:24975467G>A   | Missense Mutation | SRRM1     | p.G118R  | serine/arginine repetitiv36 (0.00)   | 175 (0.15) | 0.40 |
| 12-03 | Gp4 Focus 1 | g.chr16:2812862G>C   | Missense Mutation | SRRM2     | p.S778T  | serine/arginine repetitiv31 (0.00)   | 48 (0.42)  | 1.45 |
| 12-03 | Gp4 Focus 1 | g.chr16:2817022C>T   | Missense Mutation | SRRM2     | p.P2165S | serine/arginine repetitiv30 (0.00)   | 253 (0.13) | 0.47 |
| 12-03 | Gp4 Focus 1 | g.chr7:100483543G>A  | Nonsense Mutation | SRRT      | p.W480*  | serrate, RNA effector m35 (0.00)     | 115 (0.20) | 0.53 |
| 12-03 | Gp4 Focus 1 | g.chr7:100485362T>A  | Missense Mutation | SRRT      | p.H736Q  | serrate, RNA effector m56 (0.00)     | 144 (0.22) | 0.57 |
| 12-03 | Gp4 Focus 1 | g.chr7:149485096C>T  | RNA               | SSPO      |          | SCO-spondin 17 (0.00)                | 69 (0.13)  | 0.49 |
| 12-03 | Gp4 Focus 1 | g.chrX:48054277A>T   | Missense Mutation | SSX5      | p.I69N   | synovial sarcoma, X bre60 (0.00)     | 41 (0.46)  | 0.59 |
| 12-03 | Gp4 Focus 1 | g.chr3:52556659G>A   | Silent            | STAB1     | p.Q2233Q | stabilin 1 43 (0.00)                 | 68 (0.22)  | 0.59 |
| 12-03 | Gp4 Focus 1 | g.chr7:74303832G>T   | RNA               | STAG3L2   |          | stromal antigen 3-like 2 133 (0.00)  | 59 (0.34)  | 0.90 |
| 12-03 | Gp4 Focus 1 | g.chr10:134039103C>G | Missense Mutation | STK32C    | p.D117H  | serine/threonine kinase 116 (0.00)   | 103 (0.43) | 1.14 |
| 12-03 | Gp4 Focus 1 | g.chr9:136199408C>A  | Missense Mutation | SURF6     | p.E194D  | surfeit 6 36 (0.00)                  | 448 (0.14) | 0.48 |
| 12-03 | Gp4 Focus 1 | g.chr9:113173964C>A  | Missense Mutation | SVEP1     | p.W1986C | sushi, von Willebrand fe45 (0.00)    | 21 (0.57)  | 1.52 |
| 12-03 | Gp4 Focus 1 | g.chr8:110587722C>T  | Missense Mutation | SYBU      | p.E468K  | syntabulin (syntaxin-int40 (0.00)    | 82 (0.20)  | 0.52 |
| 12-03 | Gp4 Focus 1 | g.chr1:85655811T>G   | Missense Mutation | SYDE2     | p.Q457P  | synapse defective 1, Rh64 (0.00)     | 56 (0.39)  | 1.05 |
| 12-03 | Gp4 Focus 1 | g.chr1:33160509G>A   | Missense Mutation | SYNC      | p.A397V  | syncoilin, intermediate 141 (0.00)   | 24 (0.25)  | 0.67 |
| 12-03 | Gp4 Focus 1 | g.chr20:24524185A>G  | Missense Mutation | SYNDIG1   | p.E151G  | synapse differentiation i23 (0.00)   | 48 (0.17)  | 0.44 |
| 12-03 | Gp4 Focus 1 | g.chr14:64449373G>A  | Nonsense Mutation | SYNE2     | p.W621*  | spectrin repeat containir58 (0.00)   | 30 (0.27)  | 0.71 |
| 12-03 | Gp4 Focus 1 | g.chr4:119951109G>A  | Silent            | SYNPO2    | p.G393G  | synaptopodin 2 178 (0.00)            | 116 (0.82) | 2.18 |

|       |             |                      |                   |                  |          |                            |            |            |      |
|-------|-------------|----------------------|-------------------|------------------|----------|----------------------------|------------|------------|------|
| 12-03 | Gp4 Focus 1 | g.chr11:45274089C>A  | Missense Mutation | SYT13            | p.L243F  | synaptotagmin XIII         | 19 (0.00)  | 55 (0.18)  | 0.48 |
| 12-03 | Gp4 Focus 1 | g.chr11:61291355A>G  | Missense Mutation | SYT7             | p.I328T  | synaptotagmin VII          | 41 (0.00)  | 33 (0.30)  | 0.64 |
| 12-03 | Gp4 Focus 1 | g.chr1:43908190G>T   | Missense Mutation | SZT2             | p.W2627C | seizure threshold 2 hom    | 33 (0.00)  | 128 (0.38) | 1.02 |
| 12-03 | Gp4 Focus 1 | g.chr6:149699457G>A  | Missense Mutation | TAB2             | p.G136S  | TGF-beta activated kina    | 24 (0.00)  | 22 (0.68)  | 1.82 |
| 12-03 | Gp4 Focus 1 | g.chr6:149730821G>A  | Missense Mutation | TAB2             | p.R683H  | TGF-beta activated kina    | 77 (0.00)  | 15 (0.53)  | 1.42 |
| 12-03 | Gp4 Focus 1 | g.chr10:123847395G>T | Missense Mutation | TACC2            | p.V1794F | transforming, acidic coil  | 41 (0.00)  | 130 (0.15) | 0.39 |
| 12-03 | Gp4 Focus 1 | g.chr8:120758947G>A  | Missense Mutation | TAF2             | p.P1036S | TAF2 RNA polymerase 27     | (0.00)     | 10 (0.60)  | 1.60 |
| 12-03 | Gp4 Focus 1 | g.chr17:61492963G>A  | Silent            | TANC2            | p.E1281E | tetratricopeptide repeat,  | 85 (0.00)  | 30 (0.93)  | 2.49 |
| 12-03 | Gp4 Focus 1 | g.chr12:53897517C>T  | Missense Mutation | TARBP2           | p.S25F   | TAR (HIV-1) RNA bindi      | 15 (0.00)  | 48 (0.56)  | 1.50 |
| 12-03 | Gp4 Focus 1 | g.chr15:102261454G>A | Silent            | TARSL2           | p.L147L  | threonyl-tRNA syntheta     | 27 (0.00)  | 23 (0.61)  | 1.62 |
| 12-03 | Gp4 Focus 1 | g.chr7:122635168T>C  | Missense Mutation | TAS2R16          | p.H174R  | taste receptor, type 2, m  | 51 (0.00)  | 21 (0.24)  | 0.63 |
| 12-03 | Gp4 Focus 1 | g.chr17:77925288C>A  | Missense Mutation | TBC1D16          | p.Q350H  | TBC1 domain family, m      | 20 (0.00)  | 137 (0.14) | 0.49 |
| 12-03 | Gp4 Focus 1 | g.chr17:34803411C>A  | Missense Mutation | TBC1D3G          | p.K136N  | TBC1 domain family, m      | 46 (0.00)  | 28 (0.18)  | 0.62 |
| 12-03 | Gp4 Focus 1 | g.chr17:58085806C>G  | lincRNA           | TBC1D3P1-DHX40P1 |          | TBC1D3P1-DHX40P1           | 199 (0.00) | 104 (0.17) | 0.62 |
| 12-03 | Gp4 Focus 1 | g.chr17:58090473G>A  | lincRNA           | TBC1D3P1-DHX40P1 |          | TBC1D3P1-DHX40P1           | 150 (0.00) | 12 (0.83)  | 2.97 |
| 12-03 | Gp4 Focus 1 | g.chr5:179315190C>T  | Silent            | TBC1D9B          | p.R389R  | TBC1 domain family, m      | 19 (0.00)  | 86 (0.29)  | 0.78 |
| 12-03 | Gp4 Focus 1 | g.chr22:42610876G>A  | Missense Mutation | TCF20            | p.L146F  | transcription factor 20    | 163 (0.00) | 30 (0.23)  | 0.78 |
| 12-03 | Gp4 Focus 1 | g.chr1:152081943G>T  | Missense Mutation | TCHH             | p.F1250L | trichohyalin               | 38 (0.03)  | 63 (0.21)  | 0.55 |
| 12-03 | Gp4 Focus 1 | g.chr1:152085435G>T  | Nonsense Mutation | TCHH             | p.Y86*   | trichohyalin               | 44 (0.00)  | 82 (0.22)  | 0.59 |
| 12-03 | Gp4 Focus 1 | g.chr5:167674643C>T  | Silent            | TENM2            | p.H1994H | teneurin transmembrane     | 24 (0.00)  | 15 (0.40)  | 1.07 |
| 12-03 | Gp4 Focus 1 | g.chr11:78380192T>C  | Missense Mutation | TENM4            | p.I2400V | teneurin transmembrane     | 57 (0.00)  | 32 (0.19)  | 0.50 |
| 12-03 | Gp4 Focus 1 | g.chr17:56638908A>G  | Missense Mutation | TEX14            | p.L1423P | testis expressed 14        | 73 (0.00)  | 109 (0.18) | 0.49 |
| 12-03 | Gp4 Focus 1 | g.chr17:62271042G>T  | Missense Mutation | TEX2             | p.Q685K  | testis expressed 2         | 54 (0.00)  | 37 (0.43)  | 1.15 |
| 12-03 | Gp4 Focus 1 | g.chr3:51733577G>T   | Missense Mutation | TEX264           | p.Q212H  | testis expressed 264       | 49 (0.00)  | 46 (0.20)  | 0.52 |
| 12-03 | Gp4 Focus 1 | g.chr3:133475798C>T  | Missense Mutation | TF               | p.A272V  | transferrin                | 47 (0.00)  | 16 (0.50)  | 1.33 |
| 12-03 | Gp4 Focus 1 | g.chr22:26890138C>A  | Missense Mutation | TFIP11           | p.D709Y  | tuftelin interacting prote | 24 (0.00)  | 18 (0.44)  | 1.19 |
| 12-03 | Gp4 Focus 1 | g.chr8:134125688G>A  | Missense Mutation | TG               | p.R2532Q | thyroglobulin              | 22 (0.00)  | 20 (0.40)  | 1.07 |
| 12-03 | Gp4 Focus 1 | g.chr15:39876578T>A  | Missense Mutation | THBS1            | p.N327K  | thrombospondin 1           | 25 (0.00)  | 33 (0.45)  | 1.21 |
| 12-03 | Gp4 Focus 1 | g.chr2:88474204C>A   | Silent            | THNSL2           | p.V58V   | threonine synthase-like    | 23 (0.00)  | 75 (0.20)  | 0.39 |
| 12-03 | Gp4 Focus 1 | g.chr5:175387079G>A  | Missense Mutation | THOC3            | p.P317S  | THO complex 3              | 65 (0.00)  | 41 (0.54)  | 1.43 |
| 12-03 | Gp4 Focus 1 | g.chr13:52952547C>A  | Missense Mutation | THSD1            | p.A520S  | thrombospondin, type I,    | 39 (0.03)  | 222 (0.32) | 0.41 |
| 12-03 | Gp4 Focus 1 | g.chr15:90168022C>A  | Missense Mutation | TICRR            | p.A1494E | TOPBP1-interacting ch      | 31 (0.00)  | 27 (0.56)  | 1.48 |
| 12-03 | Gp4 Focus 1 | g.chr3:114026883C>A  | Missense Mutation | TIGIT            | p.Q214K  | T cell immunoreceptor      | 147 (0.00) | 49 (0.14)  | 0.38 |
| 12-03 | Gp4 Focus 1 | g.chr12:56827594G>T  | Missense Mutation | TIMELESS         | p.H72N   | timeless circadian clock   | 71 (0.00)  | 21 (0.48)  | 1.27 |
| 12-03 | Gp4 Focus 1 | g.chr19:39978833T>A  | Missense Mutation | TIMM50           | p.L277M  | translocase of inner mit   | 25 (0.00)  | 141 (0.16) | 0.57 |

|       |             |                     |                   |           |          |                                  |            |            |      |
|-------|-------------|---------------------|-------------------|-----------|----------|----------------------------------|------------|------------|------|
| 12-03 | Gp4 Focus 1 | g.chr20:30730810T>C | Missense Mutation | TM9SF4    | p.F185S  | transmembrane 9 superf           | 18 (0.00)  | 62 (0.48)  | 1.29 |
| 12-03 | Gp4 Focus 1 | g.chr2:98409341C>A  | Missense Mutation | TMEM131   | p.V1218F | transmembrane protein            | 16 (0.00)  | 50 (0.20)  | 0.53 |
| 12-03 | Gp4 Focus 1 | g.chr19:19243283C>T | Silent            | TMEM161A  | p.V107V  | transmembrane protein            | 22 (0.00)  | 56 (0.20)  | 0.70 |
| 12-03 | Gp4 Focus 1 | g.chr7:150493453C>G | Splice Site       | TMEM176B  |          | transmembrane protein            | 25 (0.00)  | 19 (0.53)  | 1.96 |
| 12-03 | Gp4 Focus 1 | g.chr15:72699007C>A | Missense Mutation | TMEM202   | p.A49D   | transmembrane protein            | 32 (0.00)  | 17 (0.29)  | 0.78 |
| 12-03 | Gp4 Focus 1 | g.chr3:190159235C>T | Nonsense Mutation | TMEM207   | p.W50*   | transmembrane protein            | 46 (0.00)  | 25 (0.24)  | 0.64 |
| 12-03 | Gp4 Focus 1 | g.chr10:81850597T>A | Missense Mutation | TMEM254   | p.L99Q   | transmembrane protein            | 46 (0.00)  | 30 (0.20)  | 0.53 |
| 12-03 | Gp4 Focus 1 | g.chr14:57114081T>A | Missense Mutation | TMEM260   | p.L664I  | transmembrane protein            | 17 (0.00)  | 33 (0.45)  | 1.21 |
| 12-03 | Gp4 Focus 1 | g.chr1:226048652G>T | Nonsense Mutation | TMEM63A   | p.C377*  | transmembrane protein            | 31 (0.00)  | 34 (0.29)  | 1.01 |
| 12-03 | Gp4 Focus 1 | g.chr12:98925568A>G | Missense Mutation | TMPO      | p.R173G  | thymopoietin                     | 35 (0.00)  | 24 (0.25)  | 0.67 |
| 12-03 | Gp4 Focus 1 | g.chr12:51281196A>T | Missense Mutation | TMPRSS12  | p.H316L  | transmembrane (C-term            | 21 (0.00)  | 23 (0.22)  | 0.58 |
| 12-03 | Gp4 Focus 1 | g.chr18:66344203C>T | Silent            | TMX3      | p.E444E  | thioredoxin-related tran         | 20 (0.00)  | 19 (0.74)  | 1.96 |
| 12-03 | Gp4 Focus 1 | g.chr17:17766072C>A | Missense Mutation | TOM1L2    | p.G339V  | target of myb1-like 2 (cl        | 19 (0.00)  | 25 (0.28)  | 0.75 |
| 12-03 | Gp4 Focus 1 | g.chr17:7575232G>A  | Intron            | TP53      |          | tumor protein p53                | 36 (0.00)  | 35 (0.23)  | 0.61 |
| 12-03 | Gp4 Focus 1 | g.chr17:7586095C>T  | Intron            | TP53      |          | tumor protein p53                | 24 (0.00)  | 26 (0.77)  | 2.05 |
| 12-03 | Gp4 Focus 1 | g.chr17:27898642G>A | Missense Mutation | TP53I13   | p.A73T   | tumor protein p53 induc          | 56 (0.00)  | 186 (0.16) | 0.53 |
| 12-03 | Gp4 Focus 1 | g.chr11:68840126G>C | Missense Mutation | TPCN2     | p.V365L  | two pore segment chann           | 23 (0.00)  | 88 (0.15)  | 0.51 |
| 12-03 | Gp4 Focus 1 | g.chr19:53945546G>A | RNA               | TPM3P9    |          | tropomyosin 3 pseudoge           | 27 (0.00)  | 32 (0.78)  | 2.79 |
| 12-03 | Gp4 Focus 1 | g.chr14:21500193G>C | Missense Mutation | TPPP2     | p.S157T  | tubulin polymerization- $\gamma$ | 62 (0.00)  | 12 (0.50)  | 1.33 |
| 12-03 | Gp4 Focus 1 | g.chr1:186301464G>C | Missense Mutation | TPR       | p.P1823A | translocated promoter re         | 28 (0.00)  | 25 (0.76)  | 2.03 |
| 12-03 | Gp4 Focus 1 | g.chr3:127298662A>G | Missense Mutation | TPRA1     | p.F60S   | transmembrane protein,           | 50 (0.00)  | 98 (0.14)  | 0.38 |
| 12-03 | Gp4 Focus 1 | g.chr19:57876304C>T | Missense Mutation | TRAPPC2P1 | p.R35C   | trafficking protein partic       | 49 (0.00)  | 47 (0.17)  | 0.45 |
| 12-03 | Gp4 Focus 1 | g.chr14:22446991T>C | RNA               | TRAV8-6   |          | T cell receptor alpha var        | 64 (0.00)  | 17 (0.47)  | 0.91 |
| 12-03 | Gp4 Focus 1 | g.chr17:18638583C>T | Missense Mutation | TRIM16L   | p.P286L  | tripartite motif containir       | 16 (0.00)  | 17 (0.94)  | 2.51 |
| 12-03 | Gp4 Focus 1 | g.chr9:119461005C>A | Missense Mutation | TRIM32    | p.S328R  | tripartite motif containir       | 74 (0.01)  | 57 (0.26)  | 0.70 |
| 12-03 | Gp4 Focus 1 | g.chr16:2105473C>T  | Silent            | TSC2      | p.V184V  | tuberous sclerosis 2             | 20 (0.00)  | 261 (0.15) | 0.51 |
| 12-03 | Gp4 Focus 1 | g.chr13:45149012G>A | Missense Mutation | TSC22D1   | p.P400L  | TSC22 domain family,             | 147 (0.00) | 12 (0.92)  | 1.19 |
| 12-03 | Gp4 Focus 1 | g.chr13:45149601G>A | Missense Mutation | TSC22D1   | p.L204F  | TSC22 domain family,             | 129 (0.00) | 15 (0.80)  | 1.04 |
| 12-03 | Gp4 Focus 1 | g.chr20:51871004C>A | Missense Mutation | TSHZ2     | p.T336N  | teashirt zinc finger hom         | 40 (0.00)  | 24 (0.38)  | 1.00 |
| 12-03 | Gp4 Focus 1 | g.chr19:31770056G>A | Missense Mutation | TSHZ3     | p.R215C  | teashirt zinc finger hom         | 155 (0.00) | 90 (0.20)  | 0.53 |
| 12-03 | Gp4 Focus 1 | g.chr16:67859142C>G | Missense Mutation | TSNAXIP1  | p.Q207E  | translin-associated facto        | 15 (0.00)  | 52 (0.56)  | 1.90 |
| 12-03 | Gp4 Focus 1 | g.chr1:231064814G>A | Silent            | TTC13     | p.H442H  | tetratricopeptide repeat         | 52 (0.00)  | 29 (0.55)  | 1.47 |
| 12-03 | Gp4 Focus 1 | g.chr22:28504323C>G | Missense Mutation | TTC28     | p.A504P  | tetratricopeptide repeat         | 43 (0.00)  | 44 (0.52)  | 1.39 |
| 12-03 | Gp4 Focus 1 | g.chr2:178482400C>T | Missense Mutation | TTC30A    | p.A344T  | tetratricopeptide repeat         | 104 (0.00) | 169 (0.27) | 0.73 |
| 12-03 | Gp4 Focus 1 | g.chr5:94834186G>A  | Missense Mutation | TTC37     | p.H1151Y | tetratricopeptide repeat         | 47 (0.00)  | 55 (0.25)  | 0.68 |

|       |             |                     |                   |         |           |                            |              |            |      |
|-------|-------------|---------------------|-------------------|---------|-----------|----------------------------|--------------|------------|------|
| 12-03 | Gp4 Focus 1 | g.chr14:91211211G>T | Missense Mutation | TTC7B   | p.D167E   | tetratricopeptide repeat   | 65 (0.00)    | 23 (0.22)  | 0.58 |
| 12-03 | Gp4 Focus 1 | g.chr22:43459846G>C | Silent            | TTL1    | p.L240L   | tubulin tyrosine ligase-li | 32 (0.00)    | 41 (0.24)  | 0.82 |
| 12-03 | Gp4 Focus 1 | g.chr2:179410751C>A | Missense Mutation | TTN     | p.A31738S | titin                      | 69 (0.00)    | 71 (0.99)  | 2.63 |
| 12-03 | Gp4 Focus 1 | g.chr2:179425781C>A | Missense Mutation | TTN     | p.D28360Y | titin                      | 39 (0.00)    | 20 (0.30)  | 0.80 |
| 12-03 | Gp4 Focus 1 | g.chr2:179439106G>A | Missense Mutation | TTN     | p.P23918L | titin                      | 106 (0.01)   | 139 (0.17) | 0.44 |
| 12-03 | Gp4 Focus 1 | g.chr2:179455080G>A | Missense Mutation | TTN     | p.P20458S | titin                      | 108 (0.00)   | 69 (0.20)  | 0.54 |
| 12-03 | Gp4 Focus 1 | g.chr2:179485146C>T | Missense Mutation | TTN     | p.E15368K | titin                      | 71 (0.00)    | 24 (0.62)  | 1.67 |
| 12-03 | Gp4 Focus 1 | g.chr2:179582935A>T | Missense Mutation | TTN     | p.F8266L  | titin                      | 69 (0.00)    | 31 (0.35)  | 0.95 |
| 12-03 | Gp4 Focus 1 | g.chr2:132237911C>G | Silent            | TUBA3D  | p.R215R   | tubulin, alpha 3d          | 39 (0.00)    | 25 (0.60)  | 2.14 |
| 12-03 | Gp4 Focus 1 | g.chr20:57599599G>A | Missense Mutation | TUBB1   | p.A373T   | tubulin, beta 1 class VI   | 38 (0.00)    | 43 (0.21)  | 0.56 |
| 12-03 | Gp4 Focus 1 | g.chr15:43689510G>A | Missense Mutation | TUBGCP4 | p.E424K   | tubulin, gamma comple      | 15 (0.00)    | 68 (0.50)  | 1.33 |
| 12-03 | Gp4 Focus 1 | g.chr22:50682471C>T | Missense Mutation | TUBGCP6 | p.G140R   | tubulin, gamma comple      | 26 (0.00)    | 59 (0.14)  | 0.46 |
| 12-03 | Gp4 Focus 1 | g.chrX:16850824A>G  | Missense Mutation | TXLNG   | p.I315V   | taxilin gamma              | 21 (0.00)    | 26 (0.38)  | 0.64 |
| 12-03 | Gp4 Focus 1 | g.chr18:9886243G>A  | Silent            | TXNDC2  | p.L24L    | thioredoxin domain con     | 15 (0.00)    | 20 (0.45)  | 1.20 |
| 12-03 | Gp4 Focus 1 | g.chr11:88924443G>A | Missense Mutation | TYR     | p.R298Q   | tyrosinase                 | 42 (0.00)    | 17 (0.71)  | 1.88 |
| 12-03 | Gp4 Focus 1 | g.chr3:69127005T>C  | Missense Mutation | UBA3    | p.K43E    | ubiquitin-like modifier    | 19 (0.00)    | 42 (0.24)  | 0.63 |
| 12-03 | Gp4 Focus 1 | g.chr1:64669746G>A  | Missense Mutation | UBE2U   | p.A5T     | ubiquitin-conjugating      | er 34 (0.00) | 23 (0.70)  | 1.86 |
| 12-03 | Gp4 Focus 1 | g.chr7:157041189T>C | Missense Mutation | UBE3C   | p.L870S   | ubiquitin protein ligase   | 189 (0.00)   | 101 (0.20) | 0.53 |
| 12-03 | Gp4 Focus 1 | g.chr8:103359299C>A | Silent            | UBR5    | p.V136V   | ubiquitin protein ligase   | 150 (0.00)   | 41 (0.24)  | 0.65 |
| 12-03 | Gp4 Focus 1 | g.chr2:234627941G>A | Missense Mutation | UGT1A4  | p.A159T   | UDP glucuronosyltransf     | 74 (0.00)    | 36 (0.42)  | 1.11 |
| 12-03 | Gp4 Focus 1 | g.chr4:70361547C>T  | Silent            | UGT2B4  | p.L11L    | UDP glucuronosyltransf     | 44 (0.00)    | 22 (0.23)  | 0.61 |
| 12-03 | Gp4 Focus 1 | g.chr19:18956803C>T | Silent            | UPF1    | p.G82G    | UPF1 regulator of nons     | 30 (0.00)    | 110 (0.18) | 0.64 |
| 12-03 | Gp4 Focus 1 | g.chr19:18974298C>G | Silent            | UPF1    | p.L884L   | UPF1 regulator of nons     | 63 (0.00)    | 519 (0.16) | 0.55 |
| 12-03 | Gp4 Focus 1 | g.chr19:18976259G>T | Splice Site       | UPF1    | p.G1007W  | UPF1 regulator of nons     | 47 (0.00)    | 116 (0.11) | 0.40 |
| 12-03 | Gp4 Focus 1 | g.chr11:17542528C>G | Missense Mutation | USH1C   | p.E367Q   | Usher syndrome 1C (au      | 43 (0.00)    | 42 (0.88)  | 2.35 |
| 12-03 | Gp4 Focus 1 | g.chr19:17370100G>T | Nonsense Mutation | USHBP1  | p.Y348*   | Usher syndrome 1C bin      | 15 (0.00)    | 35 (0.63)  | 2.23 |
| 12-03 | Gp4 Focus 1 | g.chr8:11996013C>A  | Missense Mutation | USP17L2 | p.G86V    | ubiquitin specific peptid  | 344 (0.00)   | 293 (0.20) | 0.54 |
| 12-03 | Gp4 Focus 1 | g.chr3:49348071G>A  | Silent            | USP4    | p.F312F   | ubiquitin specific peptid  | 36 (0.00)    | 27 (0.26)  | 0.69 |
| 12-03 | Gp4 Focus 1 | g.chr7:6189213G>A   | Splice Site       | USP42   |           | ubiquitin specific peptid  | 20 (0.00)    | 38 (0.29)  | 0.77 |
| 12-03 | Gp4 Focus 1 | g.chr10:75258554C>A | Missense Mutation | USP54   | p.G1630C  | ubiquitin specific peptid  | 50 (0.00)    | 16 (0.81)  | 2.78 |
| 12-03 | Gp4 Focus 1 | g.chr10:11504511C>A | Missense Mutation | USP6NL  | p.G806W   | USP6 N-terminal like       | 41 (0.00)    | 58 (0.43)  | 1.15 |
| 12-03 | Gp4 Focus 1 | g.chr17:30200717T>C | Missense Mutation | UTP6    | p.Q454R   | UTP6, small subunit (S     | 145 (0.00)   | 38 (0.24)  | 0.63 |
| 12-03 | Gp4 Focus 1 | g.chr17:30200719G>T | Missense Mutation | UTP6    | p.S453R   | UTP6, small subunit (S     | 141 (0.00)   | 36 (0.25)  | 0.67 |
| 12-03 | Gp4 Focus 1 | g.chr6:144811323G>A | Missense Mutation | UTRN    | p.M1417I  | utrophin                   | 23 (0.00)    | 14 (0.36)  | 0.95 |
| 12-03 | Gp4 Focus 1 | g.chr8:67578136T>C  | Missense Mutation | VCPIP1  | p.N353S   | valosin containing prote   | 51 (0.00)    | 48 (0.40)  | 1.06 |

|       |             |                      |                   |         |          |                           |            |            |      |
|-------|-------------|----------------------|-------------------|---------|----------|---------------------------|------------|------------|------|
| 12-03 | Gp4 Focus 1 | g.chr3:51454295C>A   | Missense Mutation | VPRBP   | p.E734D  | Vpr (HIV-1) binding pr    | 48 (0.00)  | 42 (0.17)  | 0.44 |
| 12-03 | Gp4 Focus 1 | g.chr9:79933427C>T   | Missense Mutation | VPS13A  | p.L1745F | vacuolar protein sorting  | 25 (0.00)  | 14 (0.57)  | 1.52 |
| 12-03 | Gp4 Focus 1 | g.chr8:100403806C>A  | Missense Mutation | VPS13B  | p.L986I  | vacuolar protein sorting  | 30 (0.00)  | 23 (0.78)  | 2.09 |
| 12-03 | Gp4 Focus 1 | g.chr8:100790994C>A  | Missense Mutation | VPS13B  | p.P2530Q | vacuolar protein sorting  | 51 (0.00)  | 85 (0.20)  | 0.53 |
| 12-03 | Gp4 Focus 1 | g.chr6:142539739C>T  | Silent            | VTA1    | p.L295L  | vesicle (multivesicular t | 17 (0.00)  | 100 (0.18) | 0.48 |
| 12-03 | Gp4 Focus 1 | g.chr2:98887308G>A   | Missense Mutation | VWA3B   | p.A1003T | von Willebrand factor A43 | 43 (0.00)  | 35 (0.40)  | 1.07 |
| 12-03 | Gp4 Focus 1 | g.chr9:137019599C>A  | Missense Mutation | WDR5    | p.P215T  | WD repeat domain 5        | 37 (0.00)  | 188 (0.15) | 0.51 |
| 12-03 | Gp4 Focus 1 | g.chr16:74943470G>A  | Missense Mutation | WDR59   | p.T524M  | WD repeat domain 59       | 30 (0.00)  | 36 (0.64)  | 1.70 |
| 12-03 | Gp4 Focus 1 | g.chr1:43688629C>T   | Silent            | WDR65   | p.N889N  |                           | 15 (0.00)  | 35 (0.29)  | 0.94 |
| 12-03 | Gp4 Focus 1 | g.chr19:38379959T>C  | Missense Mutation | WDR87   | p.K1412R | WD repeat domain 87       | 45 (0.00)  | 92 (0.13)  | 0.48 |
| 12-03 | Gp4 Focus 1 | g.chr12:1003773C>T   | Missense Mutation | WNK1    | p.A1852V | WNK lysine deficient p    | 47 (0.00)  | 25 (0.64)  | 1.71 |
| 12-03 | Gp4 Focus 1 | g.chr3:55504271C>T   | Missense Mutation | WNT5A   | p.G331D  | wingless-type MMTV ir     | 22 (0.00)  | 47 (0.32)  | 0.85 |
| 12-03 | Gp4 Focus 1 | g.chr10:102240801C>A | Silent            | WNT8B   | p.V96V   | wingless-type MMTV ir     | 29 (0.00)  | 33 (0.15)  | 0.40 |
| 12-03 | Gp4 Focus 1 | g.chr12:108634254G>C | Missense Mutation | WSCD2   | p.M426I  | WSC domain containin      | 108 (0.00) | 238 (0.29) | 0.77 |
| 12-03 | Gp4 Focus 1 | g.chr3:14209238C>T   | Intron            | XPC     |          | xeroderma pigmentosun     | 107 (0.01) | 53 (0.98)  | 1.13 |
| 12-03 | Gp4 Focus 1 | g.chr3:14217269T>A   | Intron            | XPC     |          | xeroderma pigmentosun     | 113 (0.00) | 39 (0.44)  | 0.50 |
| 12-03 | Gp4 Focus 1 | g.chr2:61721055G>A   | Nonsense Mutation | XPO1    | p.Q407*  | exportin 1                | 16 (0.00)  | 21 (0.29)  | 0.76 |
| 12-03 | Gp4 Focus 1 | g.chr2:216990707C>T  | Silent            | XRCC5   | p.L251L  | X-ray repair complemer    | 28 (0.00)  | 29 (0.24)  | 0.64 |
| 12-03 | Gp4 Focus 1 | g.chr12:69756642G>A  | Silent            | YEATS4  | p.G42G   | YEATS domain contain      | 41 (0.00)  | 37 (0.27)  | 0.72 |
| 12-03 | Gp4 Focus 1 | g.chr12:69756645C>T  | Silent            | YEATS4  | p.H43H   | YEATS domain contain      | 41 (0.00)  | 40 (0.15)  | 0.40 |
| 12-03 | Gp4 Focus 1 | g.chrX:21875362G>A   | Missense Mutation | YY2     | p.V254I  | YY2 transcription facto   | 190 (0.00) | 85 (0.76)  | 1.27 |
| 12-03 | Gp4 Focus 1 | g.chr22:50277386G>A  | Missense Mutation | ZBED4   | p.E26K   | zinc finger, BED-type c   | 30 (0.00)  | 17 (0.29)  | 0.99 |
| 12-03 | Gp4 Focus 1 | g.chr20:56188259G>A  | Silent            | ZBP1    | p.H210H  | Z-DNA binding protein     | 19 (0.00)  | 33 (0.21)  | 0.57 |
| 12-03 | Gp4 Focus 1 | g.chr20:56190071G>C  | Missense Mutation | ZBP1    | p.A125G  | Z-DNA binding protein     | 73 (0.00)  | 44 (0.18)  | 0.48 |
| 12-03 | Gp4 Focus 1 | g.chr9:129594873C>T  | Nonsense Mutation | ZBTB43  | p.Q29*   | zinc finger and BTB do    | 25 (0.00)  | 18 (0.94)  | 2.52 |
| 12-03 | Gp4 Focus 1 | g.chr1:203816625C>A  | Missense Mutation | ZC3H11A | p.S452R  | zinc finger CCCH-type     | 79 (0.00)  | 20 (0.65)  | 1.73 |
| 12-03 | Gp4 Focus 1 | g.chr7:129680936C>T  | Silent            | ZC3HC1  | p.L88L   | zinc finger, C3HC-type    | 55 (0.00)  | 81 (0.53)  | 1.42 |
| 12-03 | Gp4 Focus 1 | g.chr2:220072707G>A  | Silent            | ZFAND2B | p.R127R  | zinc finger, AN1-type d   | 22 (0.00)  | 28 (0.18)  | 0.48 |
| 12-03 | Gp4 Focus 1 | g.chr14:24003545G>C  | Silent            | ZFHX2   | p.V330V  | zinc finger homeobox 2    | 19 (0.00)  | 98 (0.28)  | 0.53 |
| 12-03 | Gp4 Focus 1 | g.chr16:72829578G>A  | Silent            | ZFHX3   | p.L2335L | zinc finger homeobox 3    | 100 (0.00) | 171 (0.23) | 0.61 |
| 12-03 | Gp4 Focus 1 | g.chr16:72991627G>T  | Nonsense Mutation | ZFHX3   | p.C806*  | zinc finger homeobox 3    | 50 (0.00)  | 256 (0.20) | 0.53 |
| 12-03 | Gp4 Focus 1 | g.chr19:36898794G>A  | Missense Mutation | ZFP82   | p.S44L   | ZFP82 zinc finger prote   | 28 (0.00)  | 72 (0.32)  | 1.17 |
| 12-03 | Gp4 Focus 1 | g.chr16:68591943G>T  | Nonsense Mutation | ZFP90   | p.E26*   | ZFP90 zinc finger prote   | 37 (0.00)  | 53 (0.30)  | 1.03 |
| 12-03 | Gp4 Focus 1 | g.chr16:25264294T>C  | Silent            | ZKSCAN2 | p.T217T  | zinc finger with KRAB     | 101 (0.00) | 44 (0.18)  | 0.48 |
| 12-03 | Gp4 Focus 1 | g.chr17:4645082G>T   | Missense Mutation | ZMYND15 | p.Q266H  | zinc finger, MYND-typ     | 31 (0.00)  | 17 (0.29)  | 0.78 |

|       |             |                     |                   |            |          |                          |            |            |      |
|-------|-------------|---------------------|-------------------|------------|----------|--------------------------|------------|------------|------|
| 12-03 | Gp4 Focus 1 | g.chr16:3282449G>C  | Missense Mutation | ZNF200     | p.D146E  | zinc finger protein 200  | 45 (0.02)  | 21 (0.43)  | 1.50 |
| 12-03 | Gp4 Focus 1 | g.chr11:7022224C>A  | Missense Mutation | ZNF214     | p.W230C  | zinc finger protein 214  | 91 (0.00)  | 22 (0.77)  | 1.55 |
| 12-03 | Gp4 Focus 1 | g.chr19:44661933G>A | Silent            | ZNF234     | p.R588R  | zinc finger protein 234  | 60 (0.00)  | 48 (0.31)  | 0.83 |
| 12-03 | Gp4 Focus 1 | g.chr6:43325190C>T  | Missense Mutation | ZNF318     | p.D288N  | zinc finger protein 318  | 17 (0.00)  | 25 (0.52)  | 1.39 |
| 12-03 | Gp4 Focus 1 | g.chr6:26637735T>A  | Silent            | ZNF322     | p.L349L  | zinc finger protein 322  | 106 (0.00) | 171 (0.23) | 0.79 |
| 12-03 | Gp4 Focus 1 | g.chr19:37101581C>G | Missense Mutation | ZNF382     | p.R57G   | zinc finger protein 382  | 15 (0.00)  | 56 (0.68)  | 2.48 |
| 12-03 | Gp4 Focus 1 | g.chr18:72344148C>T | Silent            | ZNF407     | p.L391L  | zinc finger protein 407  | 186 (0.00) | 52 (0.27)  | 0.72 |
| 12-03 | Gp4 Focus 1 | g.chr16:49764776C>A | Missense Mutation | ZNF423     | p.M61I   | zinc finger protein 423  | 39 (0.00)  | 15 (0.60)  | 1.60 |
| 12-03 | Gp4 Focus 1 | g.chr1:23688682C>T  | Missense Mutation | ZNF436     | p.S398N  | zinc finger protein 436  | 35 (0.00)  | 32 (0.16)  | 0.42 |
| 12-03 | Gp4 Focus 1 | g.chr10:31133922C>A | Missense Mutation | ZNF438     | p.V819L  | zinc finger protein 438  | 30 (0.00)  | 33 (0.18)  | 0.48 |
| 12-03 | Gp4 Focus 1 | g.chr19:53345247C>T | Silent            | ZNF468     | p.Q100Q  | zinc finger protein 468  | 57 (0.00)  | 21 (0.29)  | 1.02 |
| 12-03 | Gp4 Focus 1 | g.chr1:247492530C>T | Silent            | ZNF496     | p.V117V  | zinc finger protein 496  | 23 (0.00)  | 111 (0.24) | 0.65 |
| 12-03 | Gp4 Focus 1 | g.chr20:62598747A>G | Missense Mutation | ZNF512B    | p.L84P   | zinc finger protein 512B | 52 (0.00)  | 319 (0.20) | 0.54 |
| 12-03 | Gp4 Focus 1 | g.chr19:2876134G>A  | Silent            | ZNF556     | p.Q58Q   | zinc finger protein 556  | 98 (0.00)  | 22 (0.41)  | 1.56 |
| 12-03 | Gp4 Focus 1 | g.chr15:64967936C>T | Silent            | ZNF609     | p.I961I  | zinc finger protein 609  | 24 (0.00)  | 54 (0.19)  | 0.49 |
| 12-03 | Gp4 Focus 1 | g.chr19:53209750A>T | Missense Mutation | ZNF611     | p.D186E  | zinc finger protein 611  | 69 (0.00)  | 64 (0.28)  | 1.00 |
| 12-03 | Gp4 Focus 1 | g.chr9:116811943C>A | Silent            | ZNF618     | p.L787L  | zinc finger protein 618  | 40 (0.00)  | 391 (0.19) | 0.50 |
| 12-03 | Gp4 Focus 1 | g.chr17:16526115G>A | Silent            | ZNF624     | p.P695P  | zinc finger protein 624  | 48 (0.00)  | 45 (0.22)  | 0.59 |
| 12-03 | Gp4 Focus 1 | g.chr19:22363491C>A | Missense Mutation | ZNF676     | p.G343V  | zinc finger protein 676  | 76 (0.00)  | 44 (0.27)  | 0.97 |
| 12-03 | Gp4 Focus 1 | g.chr19:12015617C>A | Silent            | ZNF69      | p.G135G  | zinc finger protein 69   | 18 (0.00)  | 33 (0.21)  | 0.75 |
| 12-03 | Gp4 Focus 1 | g.chr15:90611556C>A | Missense Mutation | ZNF710     | p.A396D  | zinc finger protein 710  | 22 (0.00)  | 192 (0.23) | 0.61 |
| 12-03 | Gp4 Focus 1 | g.chr15:90611719G>A | Silent            | ZNF710     | p.L450L  | zinc finger protein 710  | 47 (0.00)  | 51 (0.35)  | 0.94 |
| 12-03 | Gp4 Focus 1 | g.chr7:149318081C>T | RNA               | ZNF767     |          |                          | 18 (0.00)  | 60 (0.12)  | 0.44 |
| 12-03 | Gp4 Focus 1 | g.chr7:148963789C>A | Missense Mutation | ZNF783     | p.L130M  | zinc finger family mem   | 40 (0.00)  | 312 (0.11) | 0.39 |
| 12-03 | Gp4 Focus 1 | g.chr7:149557977G>T | Missense Mutation | ZNF862     | p.E576D  | zinc finger protein 862  | 83 (0.00)  | 152 (0.18) | 0.66 |
| 12-03 | Gp4 Focus 1 | g.chr10:75558774G>A | Silent            | ZSWIM8     | p.L1392L | zinc finger, SWIM-type   | 26 (0.00)  | 81 (0.15)  | 0.40 |
| 12-03 | Gp4 Focus 2 | g.chr4:170988511C>T | Nonsense Mutation | AADAT      | p.W310*  | amino adipate aminotran  | 24 (0.00)  | 32 (0.28)  | 0.75 |
| 12-03 | Gp4 Focus 2 | g.chr7:48545969G>A  | Silent            | ABCA13     | p.L4443L | ATP-binding cassette, s  | 120 (0.00) | 45 (0.31)  | 0.83 |
| 12-03 | Gp4 Focus 2 | g.chr17:66873758C>T | Silent            | ABCA8      | p.E1367E | ATP-binding cassette, s  | 123 (0.00) | 35 (0.14)  | 0.38 |
| 12-03 | Gp4 Focus 2 | g.chr2:169791882C>T | Silent            | ABCB11     | p.E956E  | ATP-binding cassette, s  | 162 (0.00) | 103 (0.15) | 0.39 |
| 12-03 | Gp4 Focus 2 | g.chr12:21998665C>A | Nonsense Mutation | ABCC9      | p.G990*  | ATP-binding cassette, s  | 134 (0.00) | 35 (0.46)  | 1.22 |
| 12-03 | Gp4 Focus 2 | g.chr2:44078934C>T  | Silent            | ABCG8      | p.T178T  | ATP-binding cassette, s  | 155 (0.00) | 37 (0.16)  | 0.43 |
| 12-03 | Gp4 Focus 2 | g.chr2:233877953C>T | Silent            | AC106876.2 | p.F74F   |                          | 53 (0.00)  | 23 (0.30)  | 0.81 |
| 12-03 | Gp4 Focus 2 | g.chr5:179078941C>A | Missense Mutation | AC136604.1 | p.Q142K  |                          | 22 (0.00)  | 15 (0.40)  | 1.07 |
| 12-03 | Gp4 Focus 2 | g.chr17:35454032G>A | Silent            | ACACA      | p.L2227L | acetyl-CoA carboxylase   | 35 (0.00)  | 25 (0.20)  | 0.53 |

|       |             |                     |                   |            |          |                                      |            |      |
|-------|-------------|---------------------|-------------------|------------|----------|--------------------------------------|------------|------|
| 12-03 | Gp4 Focus 2 | g.chr4:8398748G>T   | Silent            | ACOX3      | p.A324A  | acyl-CoA oxidase 3, pri:46 (0.00)    | 21 (0.33)  | 1.52 |
| 12-03 | Gp4 Focus 2 | g.chr7:149983558C>A | Missense Mutation | ACTR3C     | p.W123C  | ARP3 actin-related prot:49 (0.00)    | 41 (0.24)  | 0.65 |
| 12-03 | Gp4 Focus 2 | g.chrX:127185969G>A | Missense Mutation | ACTRT1     | p.P73S   | actin-related protein T1 51 (0.00)   | 43 (0.19)  | 0.42 |
| 12-03 | Gp4 Focus 2 | g.chr8:38880759G>A  | Missense Mutation | ADAM9      | p.A277T  | ADAM metallopeptidas 17 (0.00)       | 42 (0.17)  | 0.44 |
| 12-03 | Gp4 Focus 2 | g.chr1:167865842C>T | Missense Mutation | ADCY10     | p.E244K  | adenylate cyclase 10 (so 50 (0.00)   | 58 (0.16)  | 0.41 |
| 12-03 | Gp4 Focus 2 | g.chr8:131792741G>A | Silent            | ADCY8      | p.N1217N | adenylate cyclase 8 (bra 38 (0.00)   | 39 (0.31)  | 0.82 |
| 12-03 | Gp4 Focus 2 | g.chr8:131792750C>A | Missense Mutation | ADCY8      | p.E1214D | adenylate cyclase 8 (bra 37 (0.00)   | 30 (0.40)  | 1.07 |
| 12-03 | Gp4 Focus 2 | g.chr8:67357640C>T  | Silent            | ADHFE1     | p.L181L  | alcohol dehydrogenase, 35 (0.00)     | 64 (0.19)  | 0.50 |
| 12-03 | Gp4 Focus 2 | g.chr4:7770701G>A   | Missense Mutation | AFAP1      | p.S679L  | actin filament associatec 20 (0.00)  | 17 (0.47)  | 2.14 |
| 12-03 | Gp4 Focus 2 | g.chr5:132232069C>A | Missense Mutation | AFF4       | p.E751D  | AF4/FMR2 family, men42 (0.00)        | 26 (0.19)  | 0.51 |
| 12-03 | Gp4 Focus 2 | g.chr6:151672374G>A | Missense Mutation | AKAP12     | p.V950I  | A kinase (PRKA) ancho69 (0.00)       | 37 (0.16)  | 0.51 |
| 12-03 | Gp4 Focus 2 | g.chr19:15508426G>A | Missense Mutation | AKAP8L     | p.T437I  | A kinase (PRKA) ancho23 (0.00)       | 27 (0.22)  | 0.59 |
| 12-03 | Gp4 Focus 2 | g.chr10:82012502G>A | Missense Mutation | AL359195.1 | p.G7D    | 35 (0.00)                            | 23 (0.30)  | 0.81 |
| 12-03 | Gp4 Focus 2 | g.chr10:82013288C>T | Missense Mutation | AL359195.1 | p.P269L  | 53 (0.00)                            | 31 (0.19)  | 0.52 |
| 12-03 | Gp4 Focus 2 | g.chr3:183967021A>G | Silent            | ALG3       | p.C15C   | ALG3, alpha-1,3- mann 42 (0.00)      | 16 (0.44)  | 1.17 |
| 12-03 | Gp4 Focus 2 | g.chr11:46439466G>A | Missense Mutation | AMBRA1     | p.P948L  | autophagy/beclin-1 regu 100 (0.00)   | 41 (0.15)  | 0.39 |
| 12-03 | Gp4 Focus 2 | g.chr12:53825000G>T | Missense Mutation | AMHR2      | p.D394Y  | anti-Mullerian hormone 45 (0.00)     | 58 (0.16)  | 0.41 |
| 12-03 | Gp4 Focus 2 | g.chr16:89349555C>T | Missense Mutation | ANKRD11    | p.G1132E | ankyrin repeat domain 145 (0.00)     | 41 (0.15)  | 0.39 |
| 12-03 | Gp4 Focus 2 | g.chr10:37430813T>C | Missense Mutation | ANKRD30A   | p.S274P  | ankyrin repeat domain 3 15 (0.00)    | 47 (0.11)  | 0.44 |
| 12-03 | Gp4 Focus 2 | g.chr2:98206157G>A  | RNA               | ANKRD36B   |          | ankyrin repeat domain 3 73 (0.00)    | 54 (0.70)  | 1.88 |
| 12-03 | Gp4 Focus 2 | g.chr17:41019553C>A | RNA               | AOC4P      |          | amine oxidase, copper c 47 (0.00)    | 35 (0.26)  | 0.69 |
| 12-03 | Gp4 Focus 2 | g.chr19:16317154G>A | Missense Mutation | AP1M1      | p.V68I   | adaptor-related protein c 22 (0.00)  | 24 (0.25)  | 0.67 |
| 12-03 | Gp4 Focus 2 | g.chr12:99043335G>A | Silent            | APAF1      | p.V133V  | apoptotic peptidase activ 27 (0.00)  | 15 (0.47)  | 1.24 |
| 12-03 | Gp4 Focus 2 | g.chr14:20923852G>A | Silent            | APEX1      | p.E16E   | APEX nuclease (multifu 20 (0.00)     | 35 (0.14)  | 0.38 |
| 12-03 | Gp4 Focus 2 | g.chrX:130217182G>A | Silent            | ARHGAP36   | p.L87L   | Rho GTPase activating j 24 (0.00)    | 15 (0.40)  | 0.67 |
| 12-03 | Gp4 Focus 2 | g.chr5:90669505G>A  | Missense Mutation | ARRDC3     | p.S395L  | arrestin domain containi 47 (0.00)   | 54 (0.20)  | 0.79 |
| 12-03 | Gp4 Focus 2 | g.chr19:4902748G>A  | Silent            | ARRDC5     | p.T44T   | arrestin domain containi 42 (0.00)   | 44 (0.18)  | 0.48 |
| 12-03 | Gp4 Focus 2 | g.chr2:9458726G>T   | Splice Site       | ASAP2      | p.G140V  | ArfGAP with SH3 dom:60 (0.00)        | 41 (0.20)  | 0.52 |
| 12-03 | Gp4 Focus 2 | g.chr6:101215115G>A | Missense Mutation | ASCC3      | p.T501I  | activating signal cointeg 52 (0.00)  | 47 (0.21)  | 0.57 |
| 12-03 | Gp4 Focus 2 | g.chr2:25966186A>T  | Missense Mutation | ASXL2      | p.V1007D | additional sex combs lik 41 (0.00)   | 57 (0.19)  | 0.51 |
| 12-03 | Gp4 Focus 2 | g.chr2:25976410C>T  | Missense Mutation | ASXL2      | p.G379R  | additional sex combs lik 69 (0.01)   | 142 (0.18) | 0.47 |
| 12-03 | Gp4 Focus 2 | g.chr22:39918005G>A | Missense Mutation | ATF4       | p.D152N  | activating transcription f 20 (0.00) | 75 (0.21)  | 0.57 |
| 12-03 | Gp4 Focus 2 | g.chr13:25255764G>A | Missense Mutation | ATP12A     | p.G25E   | ATPase, H+/K+ transpo 33 (0.00)      | 29 (0.21)  | 0.55 |
| 12-03 | Gp4 Focus 2 | g.chr16:84485531G>A | Silent            | ATP2C2     | p.L555L  | ATPase, Ca++ transport 36 (0.00)     | 18 (0.28)  | 0.89 |
| 12-03 | Gp4 Focus 2 | g.chr3:48491453G>A  | Silent            | ATRIP      | p.K86K   | ATR interacting protein 75 (0.00)    | 88 (0.28)  | 0.76 |



|       |             |                     |                   |           |          |                                    |            |      |
|-------|-------------|---------------------|-------------------|-----------|----------|------------------------------------|------------|------|
| 12-03 | Gp4 Focus 2 | g.chr12:657251G>A   | Missense Mutation | B4GALNT3  | p.D257N  | beta-1,4-N-acetyl-galact 15 (0.00) | 26 (0.23)  | 0.62 |
| 12-03 | Gp4 Focus 2 | g.chr7:97939854G>A  | Silent            | BAIAP2L1  | p.P286P  | BAI1-associated protein27 (0.00)   | 64 (0.09)  | 0.38 |
| 12-03 | Gp4 Focus 2 | g.chr2:160189186G>A | Silent            | BAZ2B     | p.I1936I | bromodomain adjacent t49 (0.00)    | 25 (0.20)  | 0.53 |
| 12-03 | Gp4 Focus 2 | g.chrX:18221684G>A  | Missense Mutation | BEND2     | p.P282S  | BEN domain containing 15 (0.00)    | 52 (0.63)  | 1.25 |
| 12-03 | Gp4 Focus 2 | g.chr3:5024690G>A   | Silent            | BHLHE40   | p.Q184Q  | basic helix-loop-helix fa84 (0.00) | 14 (0.43)  | 1.14 |
| 12-03 | Gp4 Focus 2 | g.chr2:32740724G>A  | Missense Mutation | BIRC6     | p.A3746T | baculoviral IAP repeat c21 (0.00)  | 67 (0.15)  | 0.40 |
| 12-03 | Gp4 Focus 2 | g.chr2:32774525C>T  | Missense Mutation | BIRC6     | p.S4374L | baculoviral IAP repeat c56 (0.00)  | 76 (0.16)  | 0.42 |
| 12-03 | Gp4 Focus 2 | g.chr15:91266271T>C | Intron            | BLM       |          | Bloom syndrome, RecQ29 (0.00)      | 35 (0.17)  | 0.46 |
| 12-03 | Gp4 Focus 2 | g.chr15:91266293A>G | Intron            | BLM       |          | Bloom syndrome, RecQ29 (0.00)      | 40 (0.15)  | 0.40 |
| 12-03 | Gp4 Focus 2 | g.chr15:91320111G>A | Intron            | BLM       |          | Bloom syndrome, RecQ15 (0.00)      | 60 (0.18)  | 0.49 |
| 12-03 | Gp4 Focus 2 | g.chr15:91320120G>A | Intron            | BLM       |          | Bloom syndrome, RecQ18 (0.00)      | 60 (0.18)  | 0.49 |
| 12-03 | Gp4 Focus 2 | g.chr15:91356957G>A | Intron            | BLM       |          | Bloom syndrome, RecQ25 (0.00)      | 95 (0.21)  | 0.56 |
| 12-03 | Gp4 Focus 2 | g.chr10:43292949C>T | Silent            | BMS1      | p.L689L  | BMS1 ribosome biogen36 (0.00)      | 36 (0.22)  | 0.76 |
| 12-03 | Gp4 Focus 2 | g.chr4:13603261C>T  | Missense Mutation | BOD1L1    | p.V1755I | biorientation of chromo92 (0.00)   | 174 (0.15) | 0.40 |
| 12-03 | Gp4 Focus 2 | g.chr4:13606508G>A  | Silent            | BOD1L1    | p.D672D  | biorientation of chromo90 (0.00)   | 112 (0.18) | 0.48 |
| 12-03 | Gp4 Focus 2 | g.chr1:220233124G>A | Silent            | BPNT1     | p.L228L  | 3'(2'), 5'-bisphosphate n58 (0.00) | 44 (0.18)  | 0.48 |
| 12-03 | Gp4 Focus 2 | g.chr17:41203938C>T | Intron            | BRCA1     |          | breast cancer 1, early on15 (0.00) | 41 (0.17)  | 0.46 |
| 12-03 | Gp4 Focus 2 | g.chr13:32956917G>A | Intron            | BRCA2     |          | breast cancer 2, early on68 (0.00) | 61 (0.30)  | 0.79 |
| 12-03 | Gp4 Focus 2 | g.chr11:8947589C>T  | Missense Mutation | C11orf16  | p.G209R  | chromosome 11 open re59 (0.00)     | 26 (0.42)  | 1.13 |
| 12-03 | Gp4 Focus 2 | g.chr14:23732136G>A | Splice Site       | C14orf164 |          | 69 (0.00)                          | 39 (0.15)  | 0.41 |
| 12-03 | Gp4 Focus 2 | g.chr16:67180180G>A | Splice Site       | C16orf70  |          | chromosome 16 open re28 (0.00)     | 54 (0.15)  | 0.40 |
| 12-03 | Gp4 Focus 2 | g.chr16:9197090C>T  | Missense Mutation | C16orf72  | p.P186L  | chromosome 16 open re17 (0.00)     | 32 (0.16)  | 0.42 |
| 12-03 | Gp4 Focus 2 | g.chr3:126915935C>G | Missense Mutation | C3orf56   | p.P136R  | chromosome 3 open rea81 (0.00)     | 39 (0.28)  | 0.75 |
| 12-03 | Gp4 Focus 2 | g.chr5:41917325G>A  | Missense Mutation | C5orf51   | p.G270E  | chromosome 5 open rea18 (0.00)     | 29 (0.17)  | 0.46 |
| 12-03 | Gp4 Focus 2 | g.chr5:41153964G>A  | Silent            | C6        | p.C746C  | complement component 27 (0.00)     | 18 (0.33)  | 0.89 |
| 12-03 | Gp4 Focus 2 | g.chr8:86250583G>A  | Silent            | CA1       | p.L45L   | carbonic anhydrase I 62 (0.00)     | 66 (0.38)  | 1.01 |
| 12-03 | Gp4 Focus 2 | g.chr1:181731730G>A | Nonsense Mutation | CACNA1E   | p.W1542* | calcium channel, voltag28 (0.00)   | 90 (0.18)  | 0.47 |
| 12-03 | Gp4 Focus 2 | g.chr1:201020130G>A | Silent            | CACNA1S   | p.Y1365Y | calcium channel, voltag29 (0.00)   | 24 (0.25)  | 0.67 |
| 12-03 | Gp4 Focus 2 | g.chr3:85085740C>G  | Intron            | CADM2     |          | cell adhesion molecule 233 (0.00)  | 30 (0.20)  | 0.53 |
| 12-03 | Gp4 Focus 2 | g.chr3:85117158G>A  | Intron            | CADM2     |          | cell adhesion molecule 243 (0.00)  | 39 (0.18)  | 0.48 |
| 12-03 | Gp4 Focus 2 | g.chr3:85156162G>A  | Intron            | CADM2     |          | cell adhesion molecule 216 (0.00)  | 46 (0.17)  | 0.46 |
| 12-03 | Gp4 Focus 2 | g.chr3:85157248G>A  | Intron            | CADM2     |          | cell adhesion molecule 255 (0.00)  | 39 (0.15)  | 0.41 |
| 12-03 | Gp4 Focus 2 | g.chr3:85239009G>A  | Intron            | CADM2     |          | cell adhesion molecule 254 (0.00)  | 59 (0.17)  | 0.45 |
| 12-03 | Gp4 Focus 2 | g.chr3:85412573G>C  | Intron            | CADM2     |          | cell adhesion molecule 2109 (0.00) | 48 (0.17)  | 0.44 |
| 12-03 | Gp4 Focus 2 | g.chr3:85579380C>G  | Intron            | CADM2     |          | cell adhesion molecule 234 (0.00)  | 72 (0.17)  | 0.44 |

|       |             |                      |                     |         |          |                                   |            |            |      |
|-------|-------------|----------------------|---------------------|---------|----------|-----------------------------------|------------|------------|------|
| 12-03 | Gp4 Focus 2 | g.chr3:85603518G>A   | Intron              | CADM2   |          | cell adhesion molecule 219 (0.00) | 14 (0.36)  | 0.95       |      |
| 12-03 | Gp4 Focus 2 | g.chr3:85666403G>T   | Intron              | CADM2   |          | cell adhesion molecule 257 (0.00) | 22 (0.32)  | 0.85       |      |
| 12-03 | Gp4 Focus 2 | g.chr3:85800395G>A   | Intron              | CADM2   |          | cell adhesion molecule 243 (0.00) | 103 (0.18) | 0.49       |      |
| 12-03 | Gp4 Focus 2 | g.chr3:85856120G>A   | Intron              | CADM2   |          | cell adhesion molecule 220 (0.00) | 39 (0.15)  | 0.41       |      |
| 12-03 | Gp4 Focus 2 | g.chr3:85869424G>A   | Intron              | CADM2   |          | cell adhesion molecule 231 (0.00) | 60 (0.22)  | 0.58       |      |
| 12-03 | Gp4 Focus 2 | g.chr8:91094887G>A   | Silent              | CALB1   | p.A13A   | calbindin 1, 28kDa                | 46 (0.00)  | 32 (0.22)  | 0.58 |
| 12-03 | Gp4 Focus 2 | g.chr15:42681196G>A  | Missense Mutation   | CAPN3   | p.V235M  | calpain 3, (p94)                  | 65 (0.02)  | 28 (0.18)  | 0.48 |
| 12-03 | Gp4 Focus 2 | g.chr11:76825414G>A  | Silent              | CAPN5   | p.R251R  | calpain 5                         | 45 (0.00)  | 35 (0.17)  | 0.46 |
| 12-03 | Gp4 Focus 2 | g.chr2:74418556G>A   | Missense Mutation   | CATX-2  | p.G14R   |                                   | 16 (0.00)  | 27 (0.30)  | 0.79 |
| 12-03 | Gp4 Focus 2 | g.chr18:70205565G>A  | Missense Mutation   | CBLN2   | p.A174V  | cerebellin 2 precursor            | 39 (0.00)  | 36 (0.19)  | 0.52 |
| 12-03 | Gp4 Focus 2 | g.chr10:70520911G>A  | Missense Mutation   | CCAR1   | p.D690N  | cell division cycle and a         | 40 (0.00)  | 62 (0.15)  | 0.39 |
| 12-03 | Gp4 Focus 2 | g.chr2:55529097C>T   | Missense Mutation   | CCDC88A | p.G1500E | coiled-coil domain cont           | 43 (0.00)  | 24 (0.21)  | 0.45 |
| 12-03 | Gp4 Focus 2 | g.chr14:91779496C>T  | Silent              | CCDC88C | p.E888E  | coiled-coil domain cont           | 35 (0.00)  | 48 (0.17)  | 0.44 |
| 12-03 | Gp4 Focus 2 | g.chr10:42920824A>T  | RNA                 | CCNYL2  |          | cyclin Y-like 2                   | 20 (0.00)  | 35 (0.74)  | 2.56 |
| 12-03 | Gp4 Focus 2 | g.chr10:73472429C>T  | Silent              | CDH23   | p.G1081G | cadherin-related 23               | 30 (0.00)  | 21 (0.33)  | 0.89 |
| 12-03 | Gp4 Focus 2 | g.chr12:123749797C>T | Missense Mutation   | CDK2AP1 | p.E48K   | cyclin-dependent kinase           | 31 (0.00)  | 55 (0.53)  | 1.41 |
| 12-03 | Gp4 Focus 2 | g.chr19:43025647G>A  | Missense Mutation   | CEACAM1 | p.P244S  | carcinoembryonic antigen          | 53 (0.00)  | 43 (0.21)  | 0.56 |
| 12-03 | Gp4 Focus 2 | g.chr22:17662415C>T  | Silent              | CECR1   | p.K498K  | cat eye syndrome chrom            | 131 (0.00) | 63 (0.30)  | 0.80 |
| 12-03 | Gp4 Focus 2 | g.chr3:48699809C>G   | Missense Mutation   | CELSR3  | p.G87R   | cadherin, EGF LAG sev             | 16 (0.00)  | 14 (0.36)  | 0.95 |
| 12-03 | Gp4 Focus 2 | g.chr3:101450768G>A  | Missense Mutation   | CEP97   | p.A178T  | centrosomal protein 97k           | 64 (0.00)  | 26 (0.19)  | 0.51 |
| 12-03 | Gp4 Focus 2 | g.chr21:37775080G>A  | Missense Mutation   | CHAF1B  | p.D230N  | chromatin assembly fact           | 98 (0.00)  | 60 (0.18)  | 0.49 |
| 12-03 | Gp4 Focus 2 | g.chr5:98259918G>A   | Intron              | CHD1    |          | chromodomain helicase             | 25 (0.00)  | 21 (0.24)  | 0.63 |
| 12-03 | Gp4 Focus 2 | g.chr12:6682247C>A   | Silent              | CHD4    | p.L1875L | chromodomain helicase             | 19 (0.00)  | 21 (0.24)  | 0.63 |
| 12-03 | Gp4 Focus 2 | g.chr20:40161867C>T  | Missense Mutation   | CHD6    | p.E126K  | chromodomain helicase             | 63 (0.00)  | 31 (0.16)  | 0.52 |
| 12-03 | Gp4 Focus 2 | g.chr14:21873998G>A  | Missense Mutation   | CHD8    | p.T978I  | chromodomain helicase             | 18 (0.00)  | 34 (0.24)  | 0.63 |
| 12-03 | Gp4 Focus 2 | g.chr16:53276894G>A  | Missense Mutation   | CHD9    | p.C1007Y | chromodomain helicase             | 44 (0.00)  | 84 (0.14)  | 0.38 |
| 12-03 | Gp4 Focus 2 | g.chr16:53288454G>A  | Silent              | CHD9    | p.L1322L | chromodomain helicase             | 102 (0.00) | 163 (0.15) | 0.41 |
| 12-03 | Gp4 Focus 2 | g.chr1:86896578G>A   | Missense Mutation   | CLCA2   | p.R170H  | chloride channel access           | 114 (0.00) | 49 (0.24)  | 0.65 |
| 12-03 | Gp4 Focus 2 | g.chr14:38724346C>T  | Silent              | CLEC14A | p.P294P  | C-type lectin domain fa           | 37 (0.00)  | 20 (0.25)  | 0.67 |
| 12-03 | Gp4 Focus 2 | g.chr17:57733367T>C  | Silent              | CLTC    | p.I316I  | clathrin, heavy chain (H          | 16 (0.00)  | 25 (0.20)  | 0.53 |
| 12-03 | Gp4 Focus 2 | g.chrX:150911895G>A  | Nonsense Mutation   | CNGA2   | p.W307*  | cyclic nucleotide gated           | 34 (0.00)  | 22 (0.32)  | 0.53 |
| 12-03 | Gp4 Focus 2 | g.chr6:154771236C>T  | De novo Start OutOf | CNKSR3  |          | CNKSR family member               | 25 (0.00)  | 41 (0.22)  | 0.59 |
| 12-03 | Gp4 Focus 2 | g.chr12:56705144C>T  | Missense Mutation   | CNPY2   | p.D87N   | canopy FGF signaling r            | 47 (0.00)  | 35 (0.14)  | 0.38 |
| 12-03 | Gp4 Focus 2 | g.chr1:205033477C>T  | Missense Mutation   | CNTN2   | p.P423L  | contactin 2 (axonal)              | 53 (0.00)  | 45 (0.24)  | 0.65 |
| 12-03 | Gp4 Focus 2 | g.chr2:125530513G>A  | Missense Mutation   | CNTNAP5 | p.V890M  | contactin associated pro          | 40 (0.00)  | 33 (0.39)  | 1.59 |

|       |             |                      |                   |              |          |                             |              |            |      |
|-------|-------------|----------------------|-------------------|--------------|----------|-----------------------------|--------------|------------|------|
| 12-03 | Gp4 Focus 2 | g.chr9:123933708G>A  | Missense Mutation | CNTRL        | p.C2100Y | centriolin                  | 53 (0.00)    | 27 (0.26)  | 0.69 |
| 12-03 | Gp4 Focus 2 | g.chrX:107783035G>A  | Splice Site       | COL4A5       | p.K47K   | collagen, type IV, alpha 17 | 17 (0.00)    | 26 (0.27)  | 0.45 |
| 12-03 | Gp4 Focus 2 | g.chr11:61196698C>T  | Missense Mutation | CPSF7        | p.G4R    | cleavage and polyadeny      | 28 (0.00)    | 50 (0.30)  | 0.80 |
| 12-03 | Gp4 Focus 2 | g.chr19:18864379C>T  | Missense Mutation | CRTC1        | p.A203V  | CREB regulated transcri     | 129 (0.00)   | 22 (0.27)  | 0.73 |
| 12-03 | Gp4 Focus 2 | g.chr3:39185882C>A   | Missense Mutation | CSRNP1       | p.D176Y  | cysteine-serine-rich nuc    | 45 (0.00)    | 20 (0.25)  | 0.67 |
| 12-03 | Gp4 Focus 2 | g.chr4:1244587G>A    | RNA               | CTBP1-AS2    |          | CTBP1 antisense RNA         | 22 (0.00)    | 17 (0.29)  | 0.78 |
| 12-03 | Gp4 Focus 2 | g.chr19:22868402C>T  | RNA               | CTC-457E21.9 |          |                             | 27 (0.00)    | 42 (0.12)  | 0.46 |
| 12-03 | Gp4 Focus 2 | g.chr10:67862982G>A  | Missense Mutation | CTNNA3       | p.S637F  | catenin (cadherin-associ    | 40 (0.00)    | 32 (0.19)  | 0.50 |
| 12-03 | Gp4 Focus 2 | g.chr11:66334725G>A  | Missense Mutation | CTSF         | p.S200L  | cathepsin F                 | 41 (0.00)    | 34 (0.26)  | 0.71 |
| 12-03 | Gp4 Focus 2 | g.chr4:74863957C>T   | Missense Mutation | CXCL5        | p.A70T   | chemokine (C-X-C moti       | 36 (0.00)    | 18 (0.39)  | 1.04 |
| 12-03 | Gp4 Focus 2 | g.chr1:47366047G>A   | RNA               | CYP4Z2P      |          | cytochrome P450, famil      | 17 (0.00)    | 16 (0.31)  | 0.83 |
| 12-03 | Gp4 Focus 2 | g.chr9:124409606C>T  | Intron            | DAB2IP       |          | DAB2 interacting protei     | 33 (0.00)    | 56 (0.14)  | 0.38 |
| 12-03 | Gp4 Focus 2 | g.chr9:124442241G>A  | Intron            | DAB2IP       |          | DAB2 interacting protei     | 67 (0.01)    | 16 (0.38)  | 1.00 |
| 12-03 | Gp4 Focus 2 | g.chr9:124452487C>T  | Intron            | DAB2IP       |          | DAB2 interacting protei     | 45 (0.00)    | 33 (0.15)  | 0.40 |
| 12-03 | Gp4 Focus 2 | g.chr11:6645078G>A   | Missense Mutation | DCHS1        | p.T2610I | dachsous cadherin-relat     | 46 (0.00)    | 60 (0.18)  | 0.49 |
| 12-03 | Gp4 Focus 2 | g.chr13:114138273C>T | Silent            | DCUN1D2      | p.E34E   | DCN1, defective in cull     | 67 (0.00)    | 27 (0.33)  | 0.89 |
| 12-03 | Gp4 Focus 2 | g.chr12:124103357G>A | Missense Mutation | DDX55        | p.E436K  | DEAD (Asp-Glu-Ala-A         | 28 (0.00)    | 46 (0.17)  | 0.46 |
| 12-03 | Gp4 Focus 2 | g.chr1:161092312G>A  | Splice Site       | DEDD         | p.D194D  | death effector domain c     | 27 (0.00)    | 32 (0.22)  | 0.58 |
| 12-03 | Gp4 Focus 2 | g.chr20:210326G>T    | Missense Mutation | DEFB129      | p.A156S  | defensin, beta 129          | 49 (0.00)    | 33 (0.24)  | 0.65 |
| 12-03 | Gp4 Focus 2 | g.chr2:234377165C>T  | Missense Mutation | DGKD         | p.S1174F | diacylglycerol kinase, d    | 42 (0.00)    | 10 (0.70)  | 1.87 |
| 12-03 | Gp4 Focus 2 | g.chr4:24572332C>T   | Missense Mutation | DHX15        | p.E216K  | DEAH (Asp-Glu-Ala-H         | 29 (0.00)    | 33 (0.24)  | 0.65 |
| 12-03 | Gp4 Focus 2 | g.chr17:5353690C>A   | Nonsense Mutation | DHX33        | p.E297*  | DEAH (Asp-Glu-Ala-H         | 83 (0.00)    | 51 (0.16)  | 0.42 |
| 12-03 | Gp4 Focus 2 | g.chr5:140903731G>A  | Missense Mutation | DIAPH1       | p.R1211W | diaphanous-related form     | 27 (0.00)    | 23 (0.22)  | 0.58 |
| 12-03 | Gp4 Focus 2 | g.chr14:95562950G>A  | Missense Mutation | DICER1       | p.A1436V | dicer 1, ribonuclease ty    | 23 (0.00)    | 39 (0.21)  | 0.55 |
| 12-03 | Gp4 Focus 2 | g.chr10:518472G>A    | Missense Mutation | DIP2C        | p.P59S   | DIP2 disco-interacting      | 48 (0.00)    | 13 (0.54)  | 1.44 |
| 12-03 | Gp4 Focus 2 | g.chr15:41223819C>T  | Silent            | DLL4         | p.Y171Y  | delta-like 4 (Drosophila    | 70 (0.00)    | 19 (0.37)  | 0.98 |
| 12-03 | Gp4 Focus 2 | g.chr10:124339155G>A | Silent            | DMBT1        | p.V247V  | deleted in malignant bra    | 237 (0.00)   | 67 (0.15)  | 0.40 |
| 12-03 | Gp4 Focus 2 | g.chr10:70182126G>A  | Silent            | DNA2         | p.D851D  | DNA replication helicase    | 70 (0.00)    | 117 (0.17) | 0.46 |
| 12-03 | Gp4 Focus 2 | g.chr7:21775420C>T   | Missense Mutation | DNAH11       | p.R2535C | dynein, axonemal, heav      | 66 (0.00)    | 102 (0.19) | 0.50 |
| 12-03 | Gp4 Focus 2 | g.chr17:76420158G>A  | Silent            | DNAH17       | p.I440I  | dynein, axonemal, heav      | 61 (0.00)    | 19 (0.42)  | 1.12 |
| 12-03 | Gp4 Focus 2 | g.chr17:11607546G>A  | Nonsense Mutation | DNAH9        | p.W1726* | dynein, axonemal, heav      | 61 (0.00)    | 42 (0.17)  | 0.44 |
| 12-03 | Gp4 Focus 2 | g.chr3:186299241C>T  | Silent            | DNAJB11      | p.L180L  | DnaJ (Hsp40) homolog,       | 66 (0.00)    | 52 (0.15)  | 0.41 |
| 12-03 | Gp4 Focus 2 | g.chr19:12987105C>T  | Missense Mutation | DNASE2       | p.G261D  | deoxyribonuclease II,       | ly 34 (0.00) | 25 (0.20)  | 0.53 |
| 12-03 | Gp4 Focus 2 | g.chr11:6519942C>T   | Missense Mutation | DNHD1        | p.P166L  | dynein heavy chain dom      | 101 (0.00)   | 32 (0.41)  | 1.08 |
| 12-03 | Gp4 Focus 2 | g.chr10:101668873G>A | Missense Mutation | DNMBP        | p.S764L  | dynamamin binding protei    | 29 (0.00)    | 20 (0.25)  | 0.67 |

|       |             |                      |                   |          |          |                                                      |            |      |
|-------|-------------|----------------------|-------------------|----------|----------|------------------------------------------------------|------------|------|
| 12-03 | Gp4 Focus 2 | g.chr19:10270547G>A  | Missense Mutation | DNMT1    | p.L365F  | DNA (cytosine-5-)-metl 37 (0.00)                     | 38 (0.21)  | 0.56 |
| 12-03 | Gp4 Focus 2 | g.chr6:7580848C>T    | Silent            | DSP      | p.T1475T | desmoplakin 82 (0.00)                                | 31 (0.23)  | 0.60 |
| 12-03 | Gp4 Focus 2 | g.chr1:221879483G>T  | Missense Mutation | DUSP10   | p.N379K  | dual specificity phosphatase 146 (0.00)              | 37 (0.57)  | 1.51 |
| 12-03 | Gp4 Focus 2 | g.chr14:102452290G>A | Silent            | DYNC1H1  | p.K576K  | dynein, cytoplasmic 1, heavy chain 21 (0.00)         | 27 (0.33)  | 0.89 |
| 12-03 | Gp4 Focus 2 | g.chr2:207530722C>A  | Missense Mutation | DYTN     | p.D338Y  | dystrotelin 76 (0.00)                                | 64 (0.16)  | 0.42 |
| 12-03 | Gp4 Focus 2 | g.chr3:137802972C>T  | Missense Mutation | DZIP1L   | p.A396T  | DAZ interacting zinc finger protein 21 (0.00)        | 35 (0.20)  | 0.53 |
| 12-03 | Gp4 Focus 2 | g.chr5:158140069G>A  | Silent            | EBF1     | p.N426N  | early B-cell factor 1 62 (0.00)                      | 30 (0.23)  | 0.62 |
| 12-03 | Gp4 Focus 2 | g.chr1:236557749G>A  | Missense Mutation | EDARADD  | p.G2D    | EDAR-associated death domain protein 21 (0.00)       | 33 (0.27)  | 0.73 |
| 12-03 | Gp4 Focus 2 | g.chr2:88874638C>T   | Missense Mutation | EIF2AK3  | p.C788Y  | eukaryotic translation initiation factor 3 (0.00)    | 105 (0.14) | 0.38 |
| 12-03 | Gp4 Focus 2 | g.chr15:40259742C>T  | Silent            | EIF2AK4  | p.Y405Y  | eukaryotic translation initiation factor 3 (0.00)    | 34 (0.18)  | 0.47 |
| 12-03 | Gp4 Focus 2 | g.chr17:12898306G>A  | Silent            | ELAC2    | p.L628L  | elaC ribonuclease Z 2 31 (0.00)                      | 24 (0.50)  | 1.33 |
| 12-03 | Gp4 Focus 2 | g.chr13:41525490G>A  | Silent            | ELF1     | p.G112G  | E74-like factor 1 (ets domain) 37 (0.00)             | 32 (0.19)  | 0.50 |
| 12-03 | Gp4 Focus 2 | g.chr4:111398170C>T  | Silent            | ENPEP    | p.L200L  | glutamyl aminopeptidase 27 (0.00)                    | 31 (0.19)  | 0.52 |
| 12-03 | Gp4 Focus 2 | g.chr22:40161500G>A  | Missense Mutation | ENTHD1   | p.P316L  | ENTH domain containing protein 40 (0.00)             | 48 (0.19)  | 0.50 |
| 12-03 | Gp4 Focus 2 | g.chr22:41521986A>T  | Missense Mutation | EP300    | p.N283I  | E1A binding protein p300 (0.00)                      | 44 (0.23)  | 0.61 |
| 12-03 | Gp4 Focus 2 | g.chr22:41572259T>A  | Missense Mutation | EP300    | p.F1596L | E1A binding protein p300 (0.00)                      | 18 (0.28)  | 0.74 |
| 12-03 | Gp4 Focus 2 | g.chr22:41572260G>A  | Missense Mutation | EP300    | p.V1597M | E1A binding protein p300 (0.00)                      | 18 (0.28)  | 0.74 |
| 12-03 | Gp4 Focus 2 | g.chr12:132479425G>A | Silent            | EP400    | p.E917E  | E1A binding protein p400 (0.00)                      | 37 (0.19)  | 0.50 |
| 12-03 | Gp4 Focus 2 | g.chr12:56489559G>T  | Missense Mutation | ERBB3    | p.R675M  | v-erb-b2 avian erythroblastic oncogene 3 (0.00)      | 49 (0.18)  | 0.49 |
| 12-03 | Gp4 Focus 2 | g.chr16:14022092G>A  | Splice Site       | ERCC4    | p.K264K  | excision repair cross-complementing factor 60 (0.00) | 27 (0.22)  | 0.59 |
| 12-03 | Gp4 Focus 2 | g.chr21:39803533C>T  | Intron            | ERG      |          | v-ets avian erythroblast oncogene 60 (0.00)          | 46 (0.26)  | 0.70 |
| 12-03 | Gp4 Focus 2 | g.chr21:39833410G>A  | Intron            | ERG      |          | v-ets avian erythroblast oncogene 42 (0.00)          | 70 (0.20)  | 0.53 |
| 12-03 | Gp4 Focus 2 | g.chr12:56537050G>A  | Missense Mutation | ESYT1    | p.R1063Q | extended synaptotagmin 21 (0.00)                     | 49 (0.16)  | 0.44 |
| 12-03 | Gp4 Focus 2 | g.chr1:11142912G>A   | Silent            | EXOSC10  | p.D371D  | exosome component 10 55 (0.00)                       | 42 (0.19)  | 0.51 |
| 12-03 | Gp4 Focus 2 | g.chr8:28574101G>C   | Silent            | EXTL3    | p.R175R  | exostosin-like glycosyltransferase 82 (0.00)         | 18 (0.28)  | 0.74 |
| 12-03 | Gp4 Focus 2 | g.chrX:154176085G>A  | Silent            | F8       | p.F667F  | coagulation factor VIII, heavy chain 29 (0.00)       | 12 (0.58)  | 0.97 |
| 12-03 | Gp4 Focus 2 | g.chr19:17653015G>A  | Missense Mutation | FAM129C  | p.S445N  | family with sequence similarity 38 (0.00)            | 24 (0.29)  | 0.78 |
| 12-03 | Gp4 Focus 2 | g.chr5:16474862C>A   | Silent            | FAM134B  | p.L353L  | family with sequence similarity 29 (0.00)            | 49 (0.20)  | 0.54 |
| 12-03 | Gp4 Focus 2 | g.chr5:137298122C>A  | Missense Mutation | FAM13B   | p.G406C  | family with sequence similarity 47 (0.00)            | 34 (0.26)  | 0.71 |
| 12-03 | Gp4 Focus 2 | g.chr1:55077364C>T   | Silent            | FAM151A  | p.L285L  | family with sequence similarity 64 (0.00)            | 19 (0.26)  | 0.70 |
| 12-03 | Gp4 Focus 2 | g.chr11:6235765C>T   | Silent            | FAM160A2 | p.A825A  | family with sequence similarity 88 (0.00)            | 27 (0.22)  | 0.59 |
| 12-03 | Gp4 Focus 2 | g.chr14:45432442C>T  | Missense Mutation | FAM179B  | p.S273F  | family with sequence similarity 41 (0.00)            | 63 (0.16)  | 0.42 |
| 12-03 | Gp4 Focus 2 | g.chr15:31210489C>T  | Missense Mutation | FAN1     | p.P645L  | FANCD2/FANCI-associated protein 19 (0.00)            | 40 (0.17)  | 0.47 |
| 12-03 | Gp4 Focus 2 | g.chr9:35078246C>A   | Missense Mutation | FANCG    | p.E134D  | Fanconi anemia, complementation group 35 (0.03)      | 33 (0.33)  | 0.89 |
| 12-03 | Gp4 Focus 2 | g.chr2:223504350C>G  | Missense Mutation | FARSB    | p.R135P  | phenylalanyl-tRNA synthetase 18 (0.00)               | 57 (0.14)  | 0.45 |

|       |             |                      |                   |         |          |                           |            |            |      |
|-------|-------------|----------------------|-------------------|---------|----------|---------------------------|------------|------------|------|
| 12-03 | Gp4 Focus 2 | g.chr4:187510185G>A  | Missense Mutation | FAT1    | p.P4443L | FAT atypical cadherin 1   | 186 (0.00) | 79 (0.18)  | 0.47 |
| 12-03 | Gp4 Focus 2 | g.chr2:97364816C>T   | RNA               | FER1L5  |          | fer-1-like family membe   | 22 (0.00)  | 28 (0.39)  | 1.05 |
| 12-03 | Gp4 Focus 2 | g.chr15:91437287G>A  | Splice Site       | FES     | p.K775K  | FES proto-oncogene, ty    | 84 (0.00)  | 48 (0.17)  | 0.44 |
| 12-03 | Gp4 Focus 2 | g.chr11:65655091G>A  | Missense Mutation | FIBP    | p.L131F  | fibroblast growth factor  | 103 (0.00) | 29 (0.17)  | 0.46 |
| 12-03 | Gp4 Focus 2 | g.chr6:76024295C>T   | Missense Mutation | FILIP1  | p.S418N  | filamin A interacting pr  | 55 (0.00)  | 135 (0.18) | 0.47 |
| 12-03 | Gp4 Focus 2 | g.chr9:115973787G>A  | Missense Mutation | FKBP15  | p.P47S   | FK506 binding protein     | 140 (0.00) | 41 (0.24)  | 0.65 |
| 12-03 | Gp4 Focus 2 | g.chr1:152281564C>T  | Missense Mutation | FLG     | p.R1933K | filaggrin                 | 36 (0.00)  | 56 (0.14)  | 0.38 |
| 12-03 | Gp4 Focus 2 | g.chrX:153592436G>A  | Missense Mutation | FLNA    | p.A745V  | filamin A, alpha          | 15 (0.00)  | 14 (0.71)  | 1.19 |
| 12-03 | Gp4 Focus 2 | g.chr5:180038347G>A  | Missense Mutation | FLT4    | p.H1224Y | fms-related tyrosine kin  | 15 (0.00)  | 17 (0.59)  | 1.57 |
| 12-03 | Gp4 Focus 2 | g.chr15:33180430G>A  | Nonsense Mutation | FMN1    | p.Q1260* | formin 1                  | 82 (0.00)  | 32 (0.16)  | 0.42 |
| 12-03 | Gp4 Focus 2 | g.chr16:15977957G>A  | Missense Mutation | FOPNL   | p.S45L   | FGFR1OP N-terminal li     | 26 (0.00)  | 33 (0.15)  | 0.40 |
| 12-03 | Gp4 Focus 2 | g.chr17:26856214C>G  | Missense Mutation | FOXN1   | p.L268V  | forkhead box N1           | 22 (0.00)  | 30 (0.17)  | 0.44 |
| 12-03 | Gp4 Focus 2 | g.chr9:14750188G>A   | Missense Mutation | FREM1   | p.P1832S | FRAS1 related extracell   | 54 (0.00)  | 59 (0.19)  | 0.50 |
| 12-03 | Gp4 Focus 2 | g.chr17:61901527C>A  | Missense Mutation | FTSJ3   | p.K357N  | FtsJ homolog 3 (E. coli)  | 43 (0.00)  | 31 (0.16)  | 0.43 |
| 12-03 | Gp4 Focus 2 | g.chr3:97705698C>T   | RNA               | GABRR3  |          | gamma-aminobutyric ac     | 24 (0.00)  | 45 (0.16)  | 0.41 |
| 12-03 | Gp4 Focus 2 | g.chr12:51753019C>A  | Missense Mutation | GALNT6  | p.S422I  | polypeptide N-acetylga    | 62 (0.00)  | 36 (0.25)  | 0.67 |
| 12-03 | Gp4 Focus 2 | g.chr4:174235285C>T  | Silent            | GALNT7  | p.T522T  | polypeptide N-acetylga    | 25 (0.00)  | 26 (0.19)  | 0.51 |
| 12-03 | Gp4 Focus 2 | g.chr9:128113092G>A  | Silent            | GAPVD1  | p.V1149V | GTPase activating prote   | 23 (0.00)  | 34 (0.18)  | 0.47 |
| 12-03 | Gp4 Focus 2 | g.chr17:34074279G>A  | Missense Mutation | GAS2L2  | p.P281S  | growth arrest-specific 2  | 62 (0.00)  | 24 (0.33)  | 0.89 |
| 12-03 | Gp4 Focus 2 | g.chr15:90784200C>T  | Silent            | GDPGP1  | p.D20D   | GDP-D-glucose phosph      | 72 (0.00)  | 46 (0.15)  | 0.41 |
| 12-03 | Gp4 Focus 2 | g.chr7:150164198G>T  | Missense Mutation | GIMAP8  | p.D138Y  | GTPase, IMAP family n     | 24 (0.00)  | 28 (0.21)  | 0.57 |
| 12-03 | Gp4 Focus 2 | g.chr3:155624035C>T  | Missense Mutation | GMPS    | p.S170F  | guanine monphosphate      | 87 (0.00)  | 66 (0.14)  | 0.52 |
| 12-03 | Gp4 Focus 2 | g.chr3:121410022T>C  | Missense Mutation | GOLGB1  | p.E2730G | golgin B1                 | 72 (0.00)  | 108 (0.15) | 0.40 |
| 12-03 | Gp4 Focus 2 | g.chr10:101163297C>T | Nonsense Mutation | GOT1    | p.W296*  | glutamic-oxaloacetic tra  | 30 (0.00)  | 30 (0.20)  | 0.53 |
| 12-03 | Gp4 Focus 2 | g.chr1:167023636C>T  | Missense Mutation | GPA33   | p.D299N  | glycoprotein A33 (trans   | 42 (0.00)  | 17 (0.29)  | 0.78 |
| 12-03 | Gp4 Focus 2 | g.chr1:156565880C>A  | Missense Mutation | GPATCH4 | p.A162S  | G patch domain contain    | 93 (0.00)  | 30 (0.27)  | 0.71 |
| 12-03 | Gp4 Focus 2 | g.chr10:25886763C>T  | Silent            | GPR158  | p.N736N  | G protein-coupled recep   | 28 (0.00)  | 46 (0.15)  | 0.41 |
| 12-03 | Gp4 Focus 2 | g.chr16:57689836G>A  | Missense Mutation | GPR56   | p.V317I  | G protein-coupled recep   | 76 (0.00)  | 43 (0.19)  | 0.50 |
| 12-03 | Gp4 Focus 2 | g.chr16:46952544C>A  | Missense Mutation | GPT2    | p.D304E  | glutamic pyruvate trans   | 24 (0.00)  | 20 (0.30)  | 0.80 |
| 12-03 | Gp4 Focus 2 | g.chr22:40351859C>A  | Missense Mutation | GRAP2   | p.L39I   | GRB2-related adaptor p    | 22 (0.00)  | 21 (0.33)  | 0.89 |
| 12-03 | Gp4 Focus 2 | g.chr17:37900461G>A  | Splice Site       | GRB7    |          | growth factor receptor-b  | 99 (0.00)  | 21 (0.57)  | 1.52 |
| 12-03 | Gp4 Focus 2 | g.chr16:10032177G>A  | Nonsense Mutation | GRIN2A  | p.Q216*  | glutamate receptor, ion   | 30 (0.00)  | 33 (0.15)  | 0.40 |
| 12-03 | Gp4 Focus 2 | g.chr7:74148315C>T   | Missense Mutation | GTF2I   | p.A452V  | general transcription fac | 19 (0.00)  | 51 (0.10)  | 0.42 |
| 12-03 | Gp4 Focus 2 | g.chr17:73774948G>A  | Silent            | H3F3B   | p.I75I   | H3 histone, family 3B     | 140 (0.03) | 13 (0.54)  | 1.44 |
| 12-03 | Gp4 Focus 2 | g.chr7:18572882C>A   | Intron            | HDAC9   |          | histone deacetylase 9     | 32 (0.00)  | 44 (0.27)  | 0.73 |

|       |             |                      |                   |           |          |                                 |            |            |      |
|-------|-------------|----------------------|-------------------|-----------|----------|---------------------------------|------------|------------|------|
| 12-03 | Gp4 Focus 2 | g.chr7:18603147C>T   | Intron            | HDAC9     |          | histone deacetylase 9           | 39 (0.00)  | 54 (0.24)  | 0.64 |
| 12-03 | Gp4 Focus 2 | g.chr7:18665634G>A   | Intron            | HDAC9     |          | histone deacetylase 9           | 56 (0.00)  | 36 (0.25)  | 0.67 |
| 12-03 | Gp4 Focus 2 | g.chr7:18701015T>C   | Intron            | HDAC9     |          | histone deacetylase 9           | 56 (0.00)  | 99 (0.28)  | 0.75 |
| 12-03 | Gp4 Focus 2 | g.chr7:18813137G>A   | Intron            | HDAC9     |          | histone deacetylase 9           | 49 (0.00)  | 86 (0.26)  | 0.68 |
| 12-03 | Gp4 Focus 2 | g.chr12:112681724C>G | Missense Mutation | HECTD4    | p.E1389Q | HECT domain containir           | 190 (0.00) | 43 (0.19)  | 0.50 |
| 12-03 | Gp4 Focus 2 | g.chr4:185941508C>T  | Missense Mutation | HELT      | p.T104M  | helt bHLH transcription         | 26 (0.00)  | 23 (0.26)  | 0.70 |
| 12-03 | Gp4 Focus 2 | g.chr2:75107481G>A   | Missense Mutation | HK2       | p.G424D  | hexokinase 2                    | 20 (0.00)  | 27 (0.26)  | 0.69 |
| 12-03 | Gp4 Focus 2 | g.chr16:72110506C>G  | Silent            | HPR       | p.L191L  | haptoglobin-related prot        | 70 (0.00)  | 65 (0.15)  | 0.41 |
| 12-03 | Gp4 Focus 2 | g.chr22:26861504G>A  | Silent            | HPS4      | p.P240P  | Hermansky-Pudlak sync           | 29 (0.00)  | 30 (0.33)  | 0.89 |
| 12-03 | Gp4 Focus 2 | g.chr1:152192218G>A  | Silent            | HRNR      | p.T629T  | hornerin                        | 116 (0.00) | 36 (0.19)  | 0.52 |
| 12-03 | Gp4 Focus 2 | g.chr1:152192634G>A  | Missense Mutation | HRNR      | p.H491Y  | hornerin                        | 83 (0.00)  | 40 (0.17)  | 0.47 |
| 12-03 | Gp4 Focus 2 | g.chr16:22926459C>T  | Missense Mutation | HS3ST2    | p.T227I  | heparan sulfate (glucosa        | 94 (0.00)  | 27 (0.19)  | 0.49 |
| 12-03 | Gp4 Focus 2 | g.chr1:120056517G>A  | Missense Mutation | HSD3B1    | p.S124N  | hydroxy-delta-5-steroid         | 118 (0.00) | 84 (0.18)  | 0.48 |
| 12-03 | Gp4 Focus 2 | g.chr9:95040546G>A   | Silent            | IARS      | p.L256L  | isoleucyl-tRNA synthet          | 80 (0.00)  | 40 (0.17)  | 0.47 |
| 12-03 | Gp4 Focus 2 | g.chr3:107885714G>A  | Missense Mutation | IFT57     | p.A323V  | intraflagellar transport        | 526 (0.04) | 49 (0.16)  | 0.44 |
| 12-03 | Gp4 Focus 2 | g.chr3:159819046G>A  | RNA               | IL12A-AS1 |          | IL12A antisense RNA             | 139 (0.00) | 32 (0.16)  | 0.42 |
| 12-03 | Gp4 Focus 2 | g.chr1:67792495G>A   | Missense Mutation | IL12RB2   | p.G148R  | interleukin 12 receptor,        | 58 (0.00)  | 98 (0.29)  | 0.76 |
| 12-03 | Gp4 Focus 2 | g.chrX:114242502G>T  | Nonsense Mutation | IL13RA2   | p.C330*  | interleukin 13 receptor,        | 22 (0.00)  | 28 (0.18)  | 0.40 |
| 12-03 | Gp4 Focus 2 | g.chr15:81552182C>T  | Missense Mutation | IL16      | p.P128S  | interleukin 16                  | 68 (0.01)  | 42 (0.17)  | 0.44 |
| 12-03 | Gp4 Focus 2 | g.chr22:17583188C>T  | Missense Mutation | IL17RA    | p.P253L  | interleukin 17 receptor         | 49 (0.00)  | 44 (0.18)  | 0.48 |
| 12-03 | Gp4 Focus 2 | g.chr1:62586932C>A   | Missense Mutation | INADL     | p.T1657K | InaD-like (Drosophila)          | 26 (0.00)  | 44 (0.18)  | 0.48 |
| 12-03 | Gp4 Focus 2 | g.chr4:142993899T>A  | Intron            | INPP4B    |          | inositol polyphosphate- $\zeta$ | 56 (0.00)  | 34 (0.15)  | 0.39 |
| 12-03 | Gp4 Focus 2 | g.chr4:143000416C>T  | Intron            | INPP4B    |          | inositol polyphosphate- $\zeta$ | 74 (0.00)  | 113 (0.16) | 0.42 |
| 12-03 | Gp4 Focus 2 | g.chr4:143190839C>T  | Intron            | INPP4B    |          | inositol polyphosphate- $\zeta$ | 34 (0.00)  | 44 (0.18)  | 0.48 |
| 12-03 | Gp4 Focus 2 | g.chr4:143519581G>A  | Intron            | INPP4B    |          | inositol polyphosphate- $\zeta$ | 108 (0.00) | 43 (0.16)  | 0.43 |
| 12-03 | Gp4 Focus 2 | g.chr4:143598958C>A  | Intron            | INPP4B    |          | inositol polyphosphate- $\zeta$ | 21 (0.00)  | 24 (0.21)  | 0.56 |
| 12-03 | Gp4 Focus 2 | g.chr4:143683761T>C  | Intron            | INPP4B    |          | inositol polyphosphate- $\zeta$ | 51 (0.00)  | 28 (0.36)  | 0.95 |
| 12-03 | Gp4 Focus 2 | g.chr22:31529449G>A  | Missense Mutation | INPP5J    | p.V429M  | inositol polyphosphate- $\zeta$ | 41 (0.00)  | 34 (0.15)  | 0.39 |
| 12-03 | Gp4 Focus 2 | g.chr1:44422885G>A   | Silent            | IPO13     | p.T430T  | importin 13                     | 85 (0.00)  | 40 (0.30)  | 0.80 |
| 12-03 | Gp4 Focus 2 | g.chr12:54793728C>T  | Missense Mutation | ITGA5     | p.D883N  | integrin, alpha 5 (fibron       | 82 (0.00)  | 27 (0.30)  | 0.79 |
| 12-03 | Gp4 Focus 2 | g.chr9:5123117C>T    | Missense Mutation | JAK2      | p.P1058L | Janus kinase 2                  | 26 (0.00)  | 30 (0.17)  | 0.44 |
| 12-03 | Gp4 Focus 2 | g.chr3:124207129G>A  | Missense Mutation | KALRN     | p.A1453T | kalirin, RhoGEF kinase          | 27 (0.00)  | 31 (0.19)  | 0.52 |
| 12-03 | Gp4 Focus 2 | g.chr2:210993868C>T  | Missense Mutation | KANSL1L   | p.V373I  | KAT8 regulatory NSL c           | 19 (0.00)  | 61 (0.16)  | 0.44 |
| 12-03 | Gp4 Focus 2 | g.chr10:76735529G>A  | Silent            | KAT6B     | p.V478V  | K(lysine) acetyltransfer        | 28 (0.00)  | 35 (0.17)  | 0.46 |
| 12-03 | Gp4 Focus 2 | g.chr12:4920153G>T   | Missense Mutation | KCNA6     | p.V316L  | potassium voltage-gated         | 22 (0.00)  | 13 (0.38)  | 1.03 |

|       |             |                      |                   |           |          |                                            |           |            |      |
|-------|-------------|----------------------|-------------------|-----------|----------|--------------------------------------------|-----------|------------|------|
| 12-03 | Gp4 Focus 2 | g.chr3:19575559G>A   | Missense Mutation | KCNH8     | p.E1098K | potassium voltage-gated 19                 | 0.00      | 34 (0.24)  | 0.63 |
| 12-03 | Gp4 Focus 2 | g.chr1:202724551G>A  | Silent            | KDM5B     | p.N462N  | lysine (K)-specific demethylase            | 36 (0.00) | 48 (0.15)  | 0.39 |
| 12-03 | Gp4 Focus 2 | g.chr13:46919720G>A  | Silent            | KIAA0226L | p.F392F  | KIAA0226-like                              | 42 (0.00) | 25 (0.20)  | 0.53 |
| 12-03 | Gp4 Focus 2 | g.chr4:154517429C>T  | Missense Mutation | KIAA0922  | p.S672F  | KIAA0922                                   | 38 (0.03) | 52 (0.15)  | 0.41 |
| 12-03 | Gp4 Focus 2 | g.chr12:105535011G>A | Missense Mutation | KIAA1033  | p.E592K  | KIAA1033                                   | 31 (0.00) | 34 (0.18)  | 0.47 |
| 12-03 | Gp4 Focus 2 | g.chr4:123237970G>A  | Silent            | KIAA1109  | p.V3541V | KIAA1109                                   | 25 (0.00) | 37 (0.16)  | 0.43 |
| 12-03 | Gp4 Focus 2 | g.chr4:37440446G>A   | Missense Mutation | KIAA1239  | p.A244T  |                                            | 46 (0.00) | 46 (0.24)  | 0.64 |
| 12-03 | Gp4 Focus 2 | g.chr1:10357269G>A   | Missense Mutation | KIF1B     | p.E694K  | kinesin family member 7                    | 75 (0.00) | 98 (0.45)  | 1.20 |
| 12-03 | Gp4 Focus 2 | g.chr5:132046693C>T  | Missense Mutation | KIF3A     | p.G396S  | kinesin family member 3                    | 62 (0.00) | 60 (0.25)  | 0.67 |
| 12-03 | Gp4 Focus 2 | g.chr4:39436201G>A   | Silent            | KLB       | p.A399A  | klotho beta                                | 28 (0.00) | 25 (0.36)  | 0.96 |
| 12-03 | Gp4 Focus 2 | g.chr1:161069906C>A  | Silent            | KLHDC9    | p.R314R  | kelch domain containing 9                  | 64 (0.00) | 47 (0.28)  | 0.74 |
| 12-03 | Gp4 Focus 2 | g.chr4:39082739G>A   | Missense Mutation | KLHL5     | p.V180I  | kelch-like family member 5                 | 22 (0.00) | 38 (0.24)  | 0.63 |
| 12-03 | Gp4 Focus 2 | g.chr7:149430301C>T  | Missense Mutation | KRBA1     | p.T692I  | KRAB-A domain containing 1                 | 61 (0.00) | 19 (0.42)  | 1.12 |
| 12-03 | Gp4 Focus 2 | g.chr17:38978597C>T  | Missense Mutation | KRT10     | p.G81S   | keratin 10                                 | 80 (0.00) | 42 (0.17)  | 0.44 |
| 12-03 | Gp4 Focus 2 | g.chr17:39553636G>A  | Silent            | KRT31     | p.F52F   | keratin 31                                 | 49 (0.00) | 41 (0.51)  | 1.37 |
| 12-03 | Gp4 Focus 2 | g.chr17:39643968G>A  | Nonsense Mutation | KRT36     | p.Q241*  | keratin 36                                 | 82 (0.00) | 40 (0.23)  | 0.60 |
| 12-03 | Gp4 Focus 2 | g.chr21:46000130G>A  | Missense Mutation | KRTAP10-5 | p.S109L  | keratin associated protein 10-5            | 20 (0.00) | 16 (0.50)  | 1.33 |
| 12-03 | Gp4 Focus 2 | g.chr21:31869281G>A  | Missense Mutation | KRTAP19-4 | p.R50C   | keratin associated protein 19-4            | 16 (0.00) | 57 (0.32)  | 0.84 |
| 12-03 | Gp4 Focus 2 | g.chr11:71277119C>G  | Missense Mutation | KRTAP5-10 | p.C162W  | keratin associated protein 5-10            | 20 (0.00) | 27 (0.22)  | 0.59 |
| 12-03 | Gp4 Focus 2 | g.chr11:71238802G>A  | Silent            | KRTAP5-7  | p.Q152Q  | keratin associated protein 5-7             | 36 (0.00) | 27 (0.26)  | 0.69 |
| 12-03 | Gp4 Focus 2 | g.chr1:183209483C>A  | Silent            | LAMC2     | p.I1095I | laminin, gamma 2                           | 50 (0.00) | 63 (0.17)  | 0.47 |
| 12-03 | Gp4 Focus 2 | g.chr3:182872149G>A  | Missense Mutation | LAMP3     | p.A3V    | lysosomal-associated membrane protein 3    | 50 (0.00) | 55 (0.47)  | 1.26 |
| 12-03 | Gp4 Focus 2 | g.chr4:113565862G>A  | Missense Mutation | LARP7     | p.E13K   | La ribonucleoprotein domain 7              | 17 (0.00) | 34 (0.15)  | 0.39 |
| 12-03 | Gp4 Focus 2 | g.chr20:36982694G>A  | Missense Mutation | LBP       | p.G127S  | lipopolysaccharide binding protein         | 24 (0.00) | 21 (0.38)  | 1.02 |
| 12-03 | Gp4 Focus 2 | g.chr1:152586534G>A  | Missense Mutation | LCE3B     | p.G83D   | late cornified envelope protein 3B         | 34 (0.00) | 30 (0.17)  | 0.44 |
| 12-03 | Gp4 Focus 2 | g.chr12:51446013C>A  | Missense Mutation | LETMD1    | p.P138Q  | LETMD1 domain containing 1                 | 65 (0.00) | 51 (0.37)  | 0.99 |
| 12-03 | Gp4 Focus 2 | g.chr6:63990210G>A   | Missense Mutation | LGSN      | p.P416S  | lens protein with GSN domain               | 25 (0.00) | 24 (0.29)  | 0.78 |
| 12-03 | Gp4 Focus 2 | g.chr12:8519315G>A   | lincRNA           | LINC00937 |          | long intergenic non-protein coding RNA 937 | 92 (0.00) | 131 (0.15) | 0.41 |
| 12-03 | Gp4 Focus 2 | g.chr5:96314977G>C   | Missense Mutation | LNPEP     | p.R52P   | leucyl/cystinyl aminopeptidase             | 35 (0.00) | 61 (0.15)  | 0.39 |
| 12-03 | Gp4 Focus 2 | g.chr4:62599259G>T   | Silent            | LPHN3     | p.L394L  | latrophilin 3                              | 71 (0.00) | 56 (0.18)  | 0.88 |
| 12-03 | Gp4 Focus 2 | g.chr1:54432007G>A   | Silent            | LRRC42    | p.V322V  | leucine rich repeat containing 42          | 23 (0.00) | 30 (0.17)  | 0.44 |
| 12-03 | Gp4 Focus 2 | g.chr13:36050069G>T  | Silent            | MAB21L1   | p.I69I   | mab-21-like 1 (C. elegans)                 | 82 (0.00) | 20 (0.25)  | 0.67 |
| 12-03 | Gp4 Focus 2 | g.chr7:20193857C>T   | Missense Mutation | MACC1     | p.E769K  | metastasis associated in colon cancer 1    | 55 (0.00) | 71 (0.14)  | 0.38 |
| 12-03 | Gp4 Focus 2 | g.chr1:39750077G>A   | Missense Mutation | MACF1     | p.E375K  | microtubule-actin crosslinking factor 1    | 39 (0.00) | 35 (0.23)  | 0.61 |
| 12-03 | Gp4 Focus 2 | g.chrX:151092936C>T  | Missense Mutation | MAGEA4    | p.P267L  | melanoma antigen family member 4           | 29 (0.00) | 26 (0.46)  | 0.77 |

|       |             |                     |                   |        |           |                           |            |            |      |
|-------|-------------|---------------------|-------------------|--------|-----------|---------------------------|------------|------------|------|
| 12-03 | Gp4 Focus 2 | g.chr7:77680222C>T  | Intron            | MAGI2  |           | membrane associated gu    | 52 (0.00)  | 81 (0.16)  | 0.43 |
| 12-03 | Gp4 Focus 2 | g.chr7:77702646G>A  | Intron            | MAGI2  |           | membrane associated gu    | 27 (0.00)  | 88 (0.16)  | 0.42 |
| 12-03 | Gp4 Focus 2 | g.chr7:77741090G>A  | Intron            | MAGI2  |           | membrane associated gu    | 35 (0.00)  | 37 (0.19)  | 0.50 |
| 12-03 | Gp4 Focus 2 | g.chr7:77811827C>T  | Intron            | MAGI2  |           | membrane associated gu    | 26 (0.00)  | 101 (0.20) | 0.53 |
| 12-03 | Gp4 Focus 2 | g.chr7:77932238G>A  | Intron            | MAGI2  |           | membrane associated gu    | 84 (0.00)  | 100 (0.33) | 0.88 |
| 12-03 | Gp4 Focus 2 | g.chr7:77985586C>T  | Intron            | MAGI2  |           | membrane associated gu    | 29 (0.00)  | 89 (0.30)  | 0.81 |
| 12-03 | Gp4 Focus 2 | g.chr7:77991771C>A  | Intron            | MAGI2  |           | membrane associated gu    | 56 (0.00)  | 73 (0.19)  | 0.51 |
| 12-03 | Gp4 Focus 2 | g.chr7:78004770C>T  | Intron            | MAGI2  |           | membrane associated gu    | 38 (0.00)  | 51 (0.18)  | 0.47 |
| 12-03 | Gp4 Focus 2 | g.chr7:78244325C>T  | Intron            | MAGI2  |           | membrane associated gu    | 24 (0.00)  | 58 (0.16)  | 0.41 |
| 12-03 | Gp4 Focus 2 | g.chr7:78338672T>A  | Intron            | MAGI2  |           | membrane associated gu    | 58 (0.00)  | 43 (0.37)  | 0.99 |
| 12-03 | Gp4 Focus 2 | g.chr7:78492563G>A  | Intron            | MAGI2  |           | membrane associated gu    | 19 (0.00)  | 52 (0.19)  | 0.51 |
| 12-03 | Gp4 Focus 2 | g.chr7:78497205G>A  | Intron            | MAGI2  |           | membrane associated gu    | 49 (0.00)  | 100 (0.41) | 1.09 |
| 12-03 | Gp4 Focus 2 | g.chr7:78615834C>T  | Intron            | MAGI2  |           | membrane associated gu    | 25 (0.00)  | 53 (0.19)  | 0.50 |
| 12-03 | Gp4 Focus 2 | g.chr7:78782008G>A  | Intron            | MAGI2  |           | membrane associated gu    | 21 (0.00)  | 31 (0.16)  | 0.43 |
| 12-03 | Gp4 Focus 2 | g.chr7:78876943C>G  | Intron            | MAGI2  |           | membrane associated gu    | 31 (0.00)  | 30 (0.20)  | 0.53 |
| 12-03 | Gp4 Focus 2 | g.chr6:10791973G>A  | Silent            | MAK    | p.A417A   | male germ cell-associat   | 17 (0.00)  | 41 (0.15)  | 0.39 |
| 12-03 | Gp4 Focus 2 | g.chr1:220986672G>A | Missense Mutation | MARC1  | p.G309E   | mitochondrial amidoxin    | 73 (0.00)  | 19 (0.32)  | 0.84 |
| 12-03 | Gp4 Focus 2 | g.chr2:20200233G>A  | Silent            | MATN3  | p.Y379Y   | matrilin 3                | 61 (0.00)  | 52 (0.23)  | 0.62 |
| 12-03 | Gp4 Focus 2 | g.chr1:150550762G>A | Silent            | MCL1   | p.L298L   | myeloid cell leukemia 1   | 29 (0.00)  | 100 (0.28) | 0.75 |
| 12-03 | Gp4 Focus 2 | g.chr20:5948189C>G  | Missense Mutation | MCM8   | p.T328R   | minichromosome maint      | 24 (0.00)  | 48 (0.15)  | 0.39 |
| 12-03 | Gp4 Focus 2 | g.chr2:32168432G>A  | Silent            | MEMO1  | p.L28L    | mediator of cell motility | 38 (0.00)  | 61 (0.16)  | 0.44 |
| 12-03 | Gp4 Focus 2 | g.chr3:15467828G>A  | Missense Mutation | METTL6 | p.T64I    | methyltransferase like 6  | 69 (0.00)  | 65 (0.18)  | 0.49 |
| 12-03 | Gp4 Focus 2 | g.chr1:12058852C>T  | Silent            | MFN2   | p.L209L   | mitofusin 2               | 43 (0.00)  | 42 (0.17)  | 0.44 |
| 12-03 | Gp4 Focus 2 | g.chr17:74771093G>A | Missense Mutation | MFSD11 | p.G297S   | major facilitator superfa | 61 (0.00)  | 96 (0.20)  | 0.53 |
| 12-03 | Gp4 Focus 2 | g.chr7:141766376C>T | Nonsense Mutation | MGAM   | p.Q1592*  | maltase-glucoamylase (;   | 41 (0.00)  | 41 (0.29)  | 0.78 |
| 12-03 | Gp4 Focus 2 | g.chr7:141766401C>T | Missense Mutation | MGAM   | p.A1600V  | maltase-glucoamylase (;   | 49 (0.00)  | 51 (0.25)  | 0.68 |
| 12-03 | Gp4 Focus 2 | g.chr14:50088371G>A | Missense Mutation | MGAT2  | p.E129K   | mannosyl (alpha-1,6-)-g   | 24 (0.00)  | 15 (0.40)  | 1.07 |
| 12-03 | Gp4 Focus 2 | g.chr1:236966801G>A | Silent            | MTR    | p.G36G    | 5-methyltetrahydrofolat   | 21 (0.00)  | 44 (0.45)  | 1.21 |
| 12-03 | Gp4 Focus 2 | g.chr7:100638730G>A | Missense Mutation | MUC12  | p.G1772D  | mucin 12, cell surface a: | 218 (0.00) | 97 (0.15)  | 0.41 |
| 12-03 | Gp4 Focus 2 | g.chr7:100638847G>A | Missense Mutation | MUC12  | p.G1811E  | mucin 12, cell surface a: | 243 (0.00) | 44 (0.32)  | 0.85 |
| 12-03 | Gp4 Focus 2 | g.chr7:100646436C>T | Missense Mutation | MUC12  | p.P4341S  | mucin 12, cell surface a: | 52 (0.00)  | 29 (0.28)  | 0.74 |
| 12-03 | Gp4 Focus 2 | g.chr19:9018439G>A  | Silent            | MUC16  | p.L12579L | mucin 16, cell surface a: | 28 (0.00)  | 29 (0.28)  | 0.74 |
| 12-03 | Gp4 Focus 2 | g.chr19:9061463G>A  | Silent            | MUC16  | p.S8661S  | mucin 16, cell surface a: | 84 (0.00)  | 90 (0.16)  | 0.41 |
| 12-03 | Gp4 Focus 2 | g.chr19:9063153A>G  | Missense Mutation | MUC16  | p.V8098A  | mucin 16, cell surface a: | 37 (0.00)  | 85 (0.16)  | 0.44 |
| 12-03 | Gp4 Focus 2 | g.chr3:195487949T>C | Missense Mutation | MUC4   | p.D649G   | mucin 4, cell surface ass | 59 (0.00)  | 20 (0.25)  | 0.67 |



|       |             |                     |                   |          |          |                                                        |           |      |
|-------|-------------|---------------------|-------------------|----------|----------|--------------------------------------------------------|-----------|------|
| 12-03 | Gp4 Focus 2 | g.chr6:135515529G>A | Silent            | MYB      | p.K293K  | v-myb avian myeloblast 20 (0.00)                       | 59 (0.15) | 0.41 |
| 12-03 | Gp4 Focus 2 | g.chr17:10547729G>A | Missense Mutation | MYH3     | p.T450M  | myosin, heavy chain 3, $\epsilon$ 39 (0.00)            | 23 (0.22) | 0.58 |
| 12-03 | Gp4 Focus 2 | g.chr6:2685639C>T   | Splice Site       | MYLK4    | p.E146K  | myosin light chain kinase 23 (0.00)                    | 22 (0.36) | 0.97 |
| 12-03 | Gp4 Focus 2 | g.chr17:18077135C>T | Missense Mutation | MYO15A   | p.T728M  | myosin XVA 40 (0.00)                                   | 22 (0.32) | 0.85 |
| 12-03 | Gp4 Focus 2 | g.chr18:3126839C>A  | Missense Mutation | MYOM1    | p.V951F  | myomesin 1 31 (0.00)                                   | 55 (0.16) | 0.44 |
| 12-03 | Gp4 Focus 2 | g.chr12:8051466C>T  | RNA               | NANOGP1  |          | Nanog homeobox pseud 78 (0.01)                         | 84 (0.14) | 0.38 |
| 12-03 | Gp4 Focus 2 | g.chr2:15674696G>A  | Silent            | NBAS     | p.I239I  | neuroblastoma amplification 18 (0.00)                  | 43 (0.26) | 0.68 |
| 12-03 | Gp4 Focus 2 | g.chr2:232320281G>A | Silent            | NCL      | p.A629A  | nucleolin 62 (0.00)                                    | 47 (0.17) | 0.45 |
| 12-03 | Gp4 Focus 2 | g.chr11:74716721C>T | Silent            | NEU3     | p.A190A  | sialidase 3 (membrane associated) 43 (0.00)            | 70 (0.17) | 0.46 |
| 12-03 | Gp4 Focus 2 | g.chr6:41048637G>A  | Splice Site       | NFYA     |          | nuclear transcription factor 38 (0.00)                 | 23 (0.22) | 0.58 |
| 12-03 | Gp4 Focus 2 | g.chr5:175815471G>A | Missense Mutation | NOP16    | p.R24W   | NOP16 nucleolar protein 33 (0.00)                      | 32 (0.25) | 0.67 |
| 12-03 | Gp4 Focus 2 | g.chr14:24773417C>A | Silent            | NOP9     | p.L527L  | NOP9 nucleolar protein 66 (0.00)                       | 34 (0.15) | 0.39 |
| 12-03 | Gp4 Focus 2 | g.chr7:75044572G>A  | RNA               | NSUN5P1  |          | NOP2/Sun domain family 78 (0.00)                       | 50 (0.12) | 0.52 |
| 12-03 | Gp4 Focus 2 | g.chr4:123838689G>A | Missense Mutation | NUDT6    | p.P137S  | nudix (nucleoside diphosphate) 30 (0.00)               | 60 (0.18) | 0.49 |
| 12-03 | Gp4 Focus 2 | g.chr4:123838694C>G | Missense Mutation | NUDT6    | p.R135T  | nudix (nucleoside diphosphate) 30 (0.00)               | 60 (0.18) | 0.49 |
| 12-03 | Gp4 Focus 2 | g.chr11:71726835C>T | Missense Mutation | NUMA1    | p.E572K  | nuclear mitotic apparatus protein 35 (0.00)            | 14 (0.36) | 0.95 |
| 12-03 | Gp4 Focus 2 | g.chr5:37351425C>T  | Missense Mutation | NUP155   | p.G197E  | nucleoporin 155kDa 37 (0.00)                           | 53 (0.15) | 0.40 |
| 12-03 | Gp4 Focus 2 | g.chr9:131757697C>T | Silent            | NUP188   | p.H1085H | nucleoporin 188kDa 78 (0.00)                           | 42 (0.40) | 1.08 |
| 12-03 | Gp4 Focus 2 | g.chr11:3724014G>A  | Missense Mutation | NUP98    | p.S1064F | nucleoporin 98kDa 44 (0.00)                            | 33 (0.33) | 0.89 |
| 12-03 | Gp4 Focus 2 | g.chr1:228432225G>A | Missense Mutation | OBSCN    | p.S1237N | obscurin, cytoskeletal component 15 (0.00)             | 42 (0.19) | 0.51 |
| 12-03 | Gp4 Focus 2 | g.chr9:138011913C>A | Silent            | OLFM1    | p.I422I  | olfactomedin 1 74 (0.00)                               | 32 (0.25) | 0.67 |
| 12-03 | Gp4 Focus 2 | g.chr13:53603053C>T | Missense Mutation | OLFM4    | p.P28S   | olfactomedin 4 41 (0.00)                               | 25 (0.20) | 0.53 |
| 12-03 | Gp4 Focus 2 | g.chr7:128415694G>A | Missense Mutation | OPN1SW   | p.L51F   | opsin 1 (cone pigments) 105 (0.00)                     | 25 (0.28) | 0.75 |
| 12-03 | Gp4 Focus 2 | g.chr1:248084523C>T | Silent            | OR2T8    | p.D68D   | olfactory receptor, family 86 (0.00)                   | 35 (0.20) | 0.53 |
| 12-03 | Gp4 Focus 2 | g.chr19:14991426C>T | Missense Mutation | OR7A17   | p.V248I  | olfactory receptor, family 20 (0.00)                   | 38 (0.18) | 0.49 |
| 12-03 | Gp4 Focus 2 | g.chr8:101718917G>A | Nonsense Mutation | PABPC1   | p.Q522*  | poly(A) binding protein 82 (0.00)                      | 46 (0.17) | 0.46 |
| 12-03 | Gp4 Focus 2 | g.chr1:176525598G>A | Missense Mutation | PAPPA2   | p.G47E   | pappalysin 2 68 (0.00)                                 | 29 (0.17) | 0.46 |
| 12-03 | Gp4 Focus 2 | g.chr1:55223584G>A  | Silent            | PARS2    | p.T417T  | prolyl-tRNA synthetase 32 (0.00)                       | 50 (0.32) | 0.85 |
| 12-03 | Gp4 Focus 2 | g.chr2:242066724C>G | Missense Mutation | PASK     | p.E536Q  | PAS domain containing 79 (0.00)                        | 32 (0.16) | 0.42 |
| 12-03 | Gp4 Focus 2 | g.chr7:154790482G>A | Missense Mutation | PAXIP1   | p.L32F   | PAX interacting (with transcription factor) 120 (0.00) | 33 (0.27) | 0.73 |
| 12-03 | Gp4 Focus 2 | g.chr1:154918714C>T | Nonsense Mutation | PBXIP1   | p.W479*  | pre-B-cell leukemia homology 55 (0.00)                 | 34 (0.26) | 0.71 |
| 12-03 | Gp4 Focus 2 | g.chr5:140210033C>A | Missense Mutation | PCDHA6   | p.A786E  | protocadherin alpha 6 20 (0.00)                        | 32 (0.19) | 0.50 |
| 12-03 | Gp4 Focus 2 | g.chr5:140710633G>A | Missense Mutation | PCDHGA1  | p.D128N  | protocadherin gamma subunit 85 (0.00)                  | 62 (0.15) | 0.39 |
| 12-03 | Gp4 Focus 2 | g.chr5:140811927C>T | Missense Mutation | PCDHGA12 | p.A534V  | protocadherin gamma subunit 61 (0.00)                  | 21 (0.29) | 0.76 |
| 12-03 | Gp4 Focus 2 | g.chr5:140811937C>T | Silent            | PCDHGA12 | p.N537N  | protocadherin gamma subunit 64 (0.00)                  | 22 (0.27) | 0.73 |

|       |             |                     |                   |          |          |                                      |           |      |
|-------|-------------|---------------------|-------------------|----------|----------|--------------------------------------|-----------|------|
| 12-03 | Gp4 Focus 2 | g.chr5:140811964G>A | Silent            | PCDHGA12 | p.V546V  | protocadherin gamma st 64 (0.00)     | 23 (0.52) | 1.39 |
| 12-03 | Gp4 Focus 2 | g.chr5:140725013C>T | Silent            | PCDHGA3  | p.I471I  | protocadherin gamma st 29 (0.00)     | 60 (0.20) | 0.53 |
| 12-03 | Gp4 Focus 2 | g.chr5:140740027G>A | Missense Mutation | PCDHGB2  | p.V109I  | protocadherin gamma st 54 (0.00)     | 37 (0.32) | 0.86 |
| 12-03 | Gp4 Focus 2 | g.chr5:140752018C>T | Missense Mutation | PCDHGB3  | p.A686V  | protocadherin gamma st 79 (0.00)     | 37 (0.19) | 0.50 |
| 12-03 | Gp4 Focus 2 | g.chr5:140865182C>T | Missense Mutation | PCDHGC4  | p.P148S  | protocadherin gamma st 64 (0.00)     | 46 (0.28) | 0.75 |
| 12-03 | Gp4 Focus 2 | g.chr17:53848466G>A | Splice Site       | PCTP     |          | phosphatidylcholine trar 31 (0.00)   | 71 (0.20) | 0.53 |
| 12-03 | Gp4 Focus 2 | g.chr5:31983679G>A  | Missense Mutation | PDZD2    | p.A299T  | PDZ domain containing 64 (0.00)      | 27 (0.19) | 0.49 |
| 12-03 | Gp4 Focus 2 | g.chr12:41967091C>T | Missense Mutation | PDZRN4   | p.S837L  | PDZ domain containing 77 (0.00)      | 30 (0.20) | 0.53 |
| 12-03 | Gp4 Focus 2 | g.chr19:57325276C>A | Nonsense Mutation | PEG3     | p.E1512* | paternally expressed 3 90 (0.00)     | 40 (0.15) | 0.40 |
| 12-03 | Gp4 Focus 2 | g.chr19:57328102C>T | Missense Mutation | PEG3     | p.E570K  | paternally expressed 3 16 (0.00)     | 45 (0.16) | 0.41 |
| 12-03 | Gp4 Focus 2 | g.chr4:152622557G>A | Missense Mutation | PET112   | p.P333L  | 48 (0.00)                            | 36 (0.19) | 0.52 |
| 12-03 | Gp4 Focus 2 | g.chr12:7360356G>A  | Silent            | PEX5     | p.L356L  | peroxisomal biogenesis 28 (0.00)     | 31 (0.19) | 0.52 |
| 12-03 | Gp4 Focus 2 | g.chr10:6265923G>A  | Missense Mutation | PFKFB3   | p.E406K  | 6-phosphofructo-2-kina: 59 (0.00)    | 31 (0.16) | 0.43 |
| 12-03 | Gp4 Focus 2 | g.chr6:28269429C>T  | Missense Mutation | PGBD1    | p.L600F  | piggyBac transposable e 62 (0.00)    | 67 (0.16) | 0.44 |
| 12-03 | Gp4 Focus 2 | g.chr1:249212344G>A | Missense Mutation | PGBD2    | p.A521T  | piggyBac transposable e 43 (0.00)    | 33 (0.55) | 1.45 |
| 12-03 | Gp4 Focus 2 | g.chr1:33833011G>A  | Nonsense Mutation | PHC2     | p.R228*  | polyhomeotic homolog : 27 (0.00)     | 17 (0.29) | 0.78 |
| 12-03 | Gp4 Focus 2 | g.chr18:60413497C>T | Intron            | PHLPP1   |          | PH domain and leucine : 16 (0.00)    | 21 (0.29) | 0.76 |
| 12-03 | Gp4 Focus 2 | g.chr18:60451520G>A | Intron            | PHLPP1   |          | PH domain and leucine : 56 (0.00)    | 50 (0.18) | 0.48 |
| 12-03 | Gp4 Focus 2 | g.chr18:60485157G>A | Intron            | PHLPP1   |          | PH domain and leucine : 28 (0.00)    | 35 (0.20) | 0.53 |
| 12-03 | Gp4 Focus 2 | g.chr18:60553324C>T | Intron            | PHLPP1   |          | PH domain and leucine : 56 (0.00)    | 62 (0.21) | 0.56 |
| 12-03 | Gp4 Focus 2 | g.chr18:60632645G>T | Intron            | PHLPP1   |          | PH domain and leucine : 28 (0.00)    | 52 (0.46) | 1.23 |
| 12-03 | Gp4 Focus 2 | g.chr18:60642970G>A | Intron            | PHLPP1   |          | PH domain and leucine : 57 (0.00)    | 59 (0.19) | 0.50 |
| 12-03 | Gp4 Focus 2 | g.chr9:131689403G>A | Silent            | PHYHD1   | p.V40V   | phytanoyl-CoA dioxyge 18 (0.00)      | 37 (0.27) | 0.72 |
| 12-03 | Gp4 Focus 2 | g.chr6:36931116C>A  | Missense Mutation | PI16     | p.P333Q  | peptidase inhibitor 16 27 (0.00)     | 23 (0.30) | 0.81 |
| 12-03 | Gp4 Focus 2 | g.chr1:145584280C>G | Silent            | PIAS3    | p.A477A  | protein inhibitor of activ 30 (0.00) | 33 (0.18) | 0.48 |
| 12-03 | Gp4 Focus 2 | g.chr3:178942525C>T | Missense Mutation | PIK3CA   | p.P778S  | phosphatidylinositol-4,5 54 (0.00)   | 27 (0.26) | 0.69 |
| 12-03 | Gp4 Focus 2 | g.chr16:81241222G>A | RNA               | PKD1L2   |          | polycystic kidney diseas 45 (0.00)   | 37 (0.16) | 0.52 |
| 12-03 | Gp4 Focus 2 | g.chr5:137226244T>C | Missense Mutation | PKD2L2   | p.F36L   | polycystic kidney diseas 56 (0.00)   | 56 (0.18) | 0.48 |
| 12-03 | Gp4 Focus 2 | g.chr8:110474026C>T | Silent            | PKHD1L1  | p.L2424L | polycystic kidney and h: 44 (0.00)   | 30 (0.20) | 0.53 |
| 12-03 | Gp4 Focus 2 | g.chr14:65208571C>T | Missense Mutation | PLEKHG3  | p.S779F  | pleckstrin homology do: 38 (0.00)    | 29 (0.24) | 0.64 |
| 12-03 | Gp4 Focus 2 | g.chrX:114874721A>G | Splice Site       | PLS3     | p.D298G  | plastin 3 15 (0.00)                  | 29 (0.31) | 0.70 |
| 12-03 | Gp4 Focus 2 | g.chr6:160237620G>A | Missense Mutation | PNLDC1   | p.C369Y  | poly(A)-specific ribonu: 88 (0.00)   | 23 (0.22) | 0.58 |
| 12-03 | Gp4 Focus 2 | g.chr7:108154721C>T | Missense Mutation | PNPLA8   | p.S258N  | patatin-like phospholipa 51 (0.00)   | 57 (0.23) | 0.61 |
| 12-03 | Gp4 Focus 2 | g.chr3:119190190G>T | Missense Mutation | POGLUT1  | p.G71C   | protein O-glycosyltrans: 19 (0.00)   | 53 (0.19) | 0.50 |
| 12-03 | Gp4 Focus 2 | g.chr17:7412292G>A  | Silent            | POLR2A   | p.T1165T | polymerase (RNA) II (E 31 (0.00)     | 53 (0.15) | 0.40 |

|       |             |                     |                       |          |          |                                             |            |      |
|-------|-------------|---------------------|-----------------------|----------|----------|---------------------------------------------|------------|------|
| 12-03 | Gp4 Focus 2 | g.chr17:7417193C>T  | Silent                | POLR2A   | p.T1870T | polymerase (RNA) II (E41 (0.00)             | 67 (0.16)  | 0.44 |
| 12-03 | Gp4 Focus 2 | g.chr4:57897145G>A  | Missense Mutation     | POLR2B   | p.M1172I | polymerase (RNA) II (E61 (0.00)             | 38 (0.21)  | 0.56 |
| 12-03 | Gp4 Focus 2 | g.chr7:44054385G>A  | RNA                   | POLR2J4  |          | polymerase (RNA) II (E74 (0.00)             | 22 (0.27)  | 0.73 |
| 12-03 | Gp4 Focus 2 | g.chr7:75052255G>A  | Missense Mutation     | POM121C  | p.A427V  | POM121 transmembran 45 (0.00)               | 25 (0.44)  | 1.91 |
| 12-03 | Gp4 Focus 2 | g.chr9:134382876G>A | Missense Mutation     | POMT1    | p.M134I  | protein-O-mannosyltran 37 (0.00)            | 27 (0.19)  | 0.49 |
| 12-03 | Gp4 Focus 2 | g.chr3:87313505C>T  | Missense Mutation     | POU1F1   | p.M124I  | POU class 1 homeobox 35 (0.00)              | 43 (0.19)  | 0.50 |
| 12-03 | Gp4 Focus 2 | g.chr11:70194509C>G | Missense Mutation     | PPFIA1   | p.L716V  | protein tyrosine phosphatase 46 (0.00)      | 37 (0.19)  | 0.50 |
| 12-03 | Gp4 Focus 2 | g.chr4:159631922G>T | Missense Mutation     | PPID     | p.Q325K  | peptidylprolyl isomerase 34 (0.00)          | 43 (0.16)  | 0.43 |
| 12-03 | Gp4 Focus 2 | g.chr1:40209591C>T  | Nonsense Mutation     | PPIE     | p.Q127*  | peptidylprolyl isomerase 47 (0.00)          | 27 (0.19)  | 0.49 |
| 12-03 | Gp4 Focus 2 | g.chr7:113519955C>T | Missense Mutation     | PPP1R3A  | p.D398N  | protein phosphatase 1, regulatory 36 (0.00) | 60 (0.22)  | 0.58 |
| 12-03 | Gp4 Focus 2 | g.chr1:12954673G>T  | Missense Mutation     | PRAMEF10 | p.P204T  | PRAME family member 40 (0.00)               | 43 (0.16)  | 0.43 |
| 12-03 | Gp4 Focus 2 | g.chr1:186277096C>T | Missense Mutation     | PRG4     | p.P749S  | proteoglycan 4 63 (0.00)                    | 28 (0.21)  | 0.57 |
| 12-03 | Gp4 Focus 2 | g.chr16:24196821C>T | Missense Mutation     | PRKCB    | p.S552F  | protein kinase C, beta 41 (0.00)            | 34 (0.21)  | 0.55 |
| 12-03 | Gp4 Focus 2 | g.chr3:53220653G>A  | Missense Mutation     | PRKCD    | p.G432R  | protein kinase C, delta 22 (0.00)           | 22 (0.36)  | 0.97 |
| 12-03 | Gp4 Focus 2 | g.chr7:18067122G>A  | Missense Mutation     | PRPS1L1  | p.A95V   | phosphoribosyl pyrophosphate 88 (0.00)      | 96 (0.15)  | 0.39 |
| 12-03 | Gp4 Focus 2 | g.chr17:46030542G>A | Missense Mutation     | PRR15L   | p.P20L   | proline rich 15-like 27 (0.00)              | 21 (0.24)  | 0.63 |
| 12-03 | Gp4 Focus 2 | g.chr19:40478145C>T | Silent                | PSMC4    | p.R43R   | proteasome (prosome, n 37 (0.00)            | 30 (0.23)  | 0.62 |
| 12-03 | Gp4 Focus 2 | g.chr14:53178219G>A | Missense Mutation     | PSMC6    | p.E154K  | proteasome (prosome, n 117 (0.00)           | 101 (0.46) | 1.21 |
| 12-03 | Gp4 Focus 2 | g.chr2:232030664G>A | Missense Mutation     | PSMD1    | p.R883Q  | proteasome (prosome, n 22 (0.00)            | 31 (0.23)  | 0.60 |
| 12-03 | Gp4 Focus 2 | g.chr10:89714051G>A | Intron                | PTEN     |          | phosphatase and tensin 149 (0.00)           | 61 (0.23)  | 0.61 |
| 12-03 | Gp4 Focus 2 | g.chr8:27255086G>A  | De novo Start InFrame | PTK2B    |          | protein tyrosine kinase 248 (0.00)          | 21 (0.24)  | 0.63 |
| 12-03 | Gp4 Focus 2 | g.chr9:8449726C>T   | Splice Site           | PTPRD    | p.P1329P | protein tyrosine phosphatase 25 (0.00)      | 80 (0.19)  | 0.50 |
| 12-03 | Gp4 Focus 2 | g.chr2:61175181C>T  | Missense Mutation     | PUS10    | p.G483D  | pseudouridylate synthase 51 (0.00)          | 31 (0.16)  | 0.43 |
| 12-03 | Gp4 Focus 2 | g.chr3:12626089G>A  | Missense Mutation     | RAF1     | p.S624F  | Raf-1 proto-oncogene, s 50 (0.00)           | 24 (0.42)  | 1.11 |
| 12-03 | Gp4 Focus 2 | g.chr3:12626372T>C  | Missense Mutation     | RAF1     | p.K593E  | Raf-1 proto-oncogene, s 105 (0.00)          | 44 (0.16)  | 0.42 |
| 12-03 | Gp4 Focus 2 | g.chr13:48977620G>A | Intron                | RB1      |          | retinoblastoma 1 26 (0.00)                  | 32 (0.25)  | 0.67 |
| 12-03 | Gp4 Focus 2 | g.chr13:48999709C>T | Intron                | RB1      |          | retinoblastoma 1 17 (0.00)                  | 37 (0.16)  | 0.43 |
| 12-03 | Gp4 Focus 2 | g.chrX:106310817G>A | Silent                | RBM41    | p.L394L  | RNA binding motif protein 28 (0.00)         | 53 (0.17)  | 0.38 |
| 12-03 | Gp4 Focus 2 | g.chr11:66444439C>T | Missense Mutation     | RBM4B    | p.G38S   | RNA binding motif protein 92 (0.00)         | 37 (0.22)  | 0.58 |
| 12-03 | Gp4 Focus 2 | g.chr7:103236996C>T | Missense Mutation     | RELN     | p.R1149K | reelin 24 (0.00)                            | 25 (0.24)  | 0.64 |
| 12-03 | Gp4 Focus 2 | g.chr4:57797262G>A  | Silent                | REST     | p.Q746Q  | RE1-silencing transcript 152 (0.00)         | 66 (0.35)  | 0.93 |
| 12-03 | Gp4 Focus 2 | g.chr9:136277502T>A | Missense Mutation     | REXO4    | p.Y276F  | REX4, RNA exonuclease 77 (0.00)             | 20 (0.30)  | 0.80 |
| 12-03 | Gp4 Focus 2 | g.chr3:16535350C>T  | Silent                | RFTN1    | p.E9E    | raftlin, lipid raft linker 194 (0.00)       | 39 (0.67)  | 1.78 |
| 12-03 | Gp4 Focus 2 | g.chr2:107040786G>A | Nonsense Mutation     | RGPD3    | p.Q1213* | RANBP2-like and GRIF 107 (0.01)             | 139 (0.17) | 0.64 |
| 12-03 | Gp4 Focus 2 | g.chr2:108496546C>T | Missense Mutation     | RGPD4    | p.L1683F | RANBP2-like and GRIF 122 (0.00)             | 97 (0.10)  | 0.38 |

|       |             |                      |                   |              |          |                           |            |           |      |
|-------|-------------|----------------------|-------------------|--------------|----------|---------------------------|------------|-----------|------|
| 12-03 | Gp4 Focus 2 | g.chr18:13731535G>A  | Missense Mutation | RNMT         | p.A7T    | RNA (guanine-7-) meth     | 19 (0.00)  | 40 (0.15) | 0.40 |
| 12-03 | Gp4 Focus 2 | g.chr11:124765442C>T | Missense Mutation | ROBO4        | p.G316D  | roundabout, axon guida    | 26 (0.00)  | 14 (0.36) | 0.95 |
| 12-03 | Gp4 Focus 2 | g.chr16:12021549G>A  | Missense Mutation | RP11-166B2.1 | p.S292L  |                           | 181 (0.00) | 63 (0.14) | 0.38 |
| 12-03 | Gp4 Focus 2 | g.chr16:12021561G>A  | Missense Mutation | RP11-166B2.1 | p.P288L  |                           | 182 (0.00) | 58 (0.16) | 0.41 |
| 12-03 | Gp4 Focus 2 | g.chr1:155141989G>A  | Missense Mutation | RP11-201K10. | p.P217S  |                           | 22 (0.00)  | 22 (0.23) | 0.61 |
| 12-03 | Gp4 Focus 2 | g.chr3:187433497G>A  | Missense Mutation | RP11-211G3.3 | p.G33D   |                           | 38 (0.00)  | 57 (0.16) | 0.42 |
| 12-03 | Gp4 Focus 2 | g.chr3:187433524G>A  | Missense Mutation | RP11-211G3.3 | p.S42N   |                           | 29 (0.00)  | 65 (0.15) | 0.41 |
| 12-03 | Gp4 Focus 2 | g.chr10:42831772G>A  | RNA               | RP11-313J2.1 |          |                           | 37 (0.00)  | 64 (0.11) | 0.38 |
| 12-03 | Gp4 Focus 2 | g.chr7:63353853G>A   | lincRNA           | RP11-340I6.7 |          |                           | 84 (0.00)  | 34 (0.18) | 0.76 |
| 12-03 | Gp4 Focus 2 | g.chr14:24600988C>T  | Missense Mutation | RP11-468E2.6 | p.P260S  |                           | 26 (0.00)  | 15 (0.47) | 1.24 |
| 12-03 | Gp4 Focus 2 | g.chr17:3214154C>T   | RNA               | RP11-64J4.2  |          |                           | 46 (0.00)  | 23 (0.26) | 0.70 |
| 12-03 | Gp4 Focus 2 | g.chr15:41829170C>A  | Missense Mutation | RPAP1        | p.D52Y   | RNA polymerase II assc    | 94 (0.00)  | 33 (0.24) | 0.65 |
| 12-03 | Gp4 Focus 2 | g.chr17:37357546C>T  | Missense Mutation | RPL19        | p.T27I   | ribosomal protein L19     | 37 (0.00)  | 47 (0.17) | 0.45 |
| 12-03 | Gp4 Focus 2 | g.chr15:40863926C>T  | Missense Mutation | RPUSD2       | p.H183Y  | RNA pseudouridylate sy    | 52 (0.00)  | 25 (0.24) | 0.64 |
| 12-03 | Gp4 Focus 2 | g.chr1:218475661C>T  | Silent            | RRP15        | p.H55H   | ribosomal RNA process     | 45 (0.00)  | 47 (0.26) | 0.68 |
| 12-03 | Gp4 Focus 2 | g.chr9:35546526G>A   | Missense Mutation | RUSC2        | p.S3N    | RUN and SH3 domain c      | 18 (0.00)  | 22 (0.27) | 0.73 |
| 12-03 | Gp4 Focus 2 | g.chr3:72474666G>A   | Intron            | RYBP         |          | RING1 and YY1 bindin      | 60 (0.00)  | 40 (0.40) | 1.07 |
| 12-03 | Gp4 Focus 2 | g.chr12:46318555G>A  | Nonsense Mutation | SCAF11       | p.Q1288* | SR-related CTD-associa    | 17 (0.00)  | 22 (0.23) | 0.61 |
| 12-03 | Gp4 Focus 2 | g.chr7:29980461C>T   | Silent            | SCRN1        | p.S192S  | secernin 1                | 17 (0.00)  | 41 (0.15) | 0.39 |
| 12-03 | Gp4 Focus 2 | g.chr7:83614762G>T   | Missense Mutation | SEMA3A       | p.S495Y  | sema domain, immunog      | 18 (0.00)  | 47 (0.15) | 0.40 |
| 12-03 | Gp4 Focus 2 | g.chr3:50219769C>A   | Silent            | SEMA3F       | p.A232A  | sema domain, immunog      | 27 (0.00)  | 40 (0.17) | 0.47 |
| 12-03 | Gp4 Focus 2 | g.chr10:102740587C>T | Silent            | SEMA4G       | p.L492L  | sema domain, immunog      | 17 (0.00)  | 25 (0.20) | 0.53 |
| 12-03 | Gp4 Focus 2 | g.chr18:61647065C>T  | Missense Mutation | SERPINB8     | p.H67Y   | serpin peptidase inhibi   | 51 (0.00)  | 93 (0.26) | 0.69 |
| 12-03 | Gp4 Focus 2 | g.chr1:173878928G>T  | Silent            | SERPINC1     | p.P305P  | serpin peptidase inhibi   | 62 (0.00)  | 41 (0.15) | 0.39 |
| 12-03 | Gp4 Focus 2 | g.chr1:154938476C>T  | Missense Mutation | SHC1         | p.G445R  | SHC (Src homology 2 d     | 19 (0.00)  | 24 (0.29) | 0.78 |
| 12-03 | Gp4 Focus 2 | g.chr9:91657089G>A   | Silent            | SHC3         | p.D404D  | SHC (Src homology 2 d     | 32 (0.00)  | 41 (0.17) | 0.46 |
| 12-03 | Gp4 Focus 2 | g.chr3:72864821G>A   | Intron            | SHQ1         |          | SHQ1, H/ACA ribonucl      | 40 (0.00)  | 31 (0.16) | 0.43 |
| 12-03 | Gp4 Focus 2 | g.chr3:72875098C>T   | Intron            | SHQ1         |          | SHQ1, H/ACA ribonucl      | 42 (0.00)  | 92 (0.20) | 0.52 |
| 12-03 | Gp4 Focus 2 | g.chr11:111594380C>A | Missense Mutation | SIK2         | p.L770M  | salt-inducible kinase 2   | 62 (0.00)  | 44 (0.16) | 0.42 |
| 12-03 | Gp4 Focus 2 | g.chr10:61414159C>A  | Missense Mutation | SLC16A9      | p.D209Y  | solute carrier family 16, | 51 (0.00)  | 59 (0.15) | 0.41 |
| 12-03 | Gp4 Focus 2 | g.chr6:133110931C>A  | Missense Mutation | SLC18B1      | p.V109F  | solute carrier family 18, | 33 (0.00)  | 32 (0.16) | 0.42 |
| 12-03 | Gp4 Focus 2 | g.chr11:124949021G>A | Missense Mutation | SLC37A2      | p.E110K  | solute carrier family 37, | 76 (0.00)  | 29 (0.21) | 0.55 |
| 12-03 | Gp4 Focus 2 | g.chr3:50255357C>T   | RNA               | SLC38A3      |          | solute carrier family 38, | 58 (0.00)  | 32 (0.16) | 0.42 |
| 12-03 | Gp4 Focus 2 | g.chr9:108145534C>T  | Missense Mutation | SLC44A1      | p.S588F  | solute carrier family 44, | 52 (0.00)  | 93 (0.29) | 0.77 |
| 12-03 | Gp4 Focus 2 | g.chr2:27423947G>A   | Silent            | SLC5A6       | p.T561T  | solute carrier family 5 ( | 27 (0.00)  | 23 (0.48) | 1.28 |

|       |             |                     |                   |                  |          |                                     |            |      |
|-------|-------------|---------------------|-------------------|------------------|----------|-------------------------------------|------------|------|
| 12-03 | Gp4 Focus 2 | g.chr3:170198160G>A | Silent            | SLC7A14          | p.A637A  | solute carrier family 7, r28 (0.00) | 42 (0.36)  | 0.95 |
| 12-03 | Gp4 Focus 2 | g.chr1:27480616C>A  | Missense Mutation | SLC9A1           | p.E70D   | solute carrier family 9, s26 (0.00) | 24 (0.29)  | 0.78 |
| 12-03 | Gp4 Focus 2 | g.chr12:21377702G>A | Silent            | SLCO1B1          | p.T598T  | solute carrier organic an28 (0.00)  | 45 (0.20)  | 0.53 |
| 12-03 | Gp4 Focus 2 | g.chr10:98762722G>A | Missense Mutation | SLIT1            | p.A1298V | slit homolog 1 (Drosoph55 (0.02)    | 25 (0.28)  | 0.75 |
| 12-03 | Gp4 Focus 2 | g.chr15:59172239C>A | Nonsense Mutation | SLTM             | p.G1022* | SAFB-like, transcriptior35 (0.00)   | 33 (0.48)  | 1.29 |
| 12-03 | Gp4 Focus 2 | g.chr18:48582726G>A | Intron            | SMAD4            |          | SMAD family member '72 (0.00)       | 54 (0.17)  | 0.44 |
| 12-03 | Gp4 Focus 2 | g.chr14:91927762G>A | Missense Mutation | SMEK1            | p.P772L  | SMEK homolog 1, supp110 (0.01)      | 108 (0.26) | 0.69 |
| 12-03 | Gp4 Focus 2 | g.chr16:18896889G>A | Missense Mutation | SMG1             | p.P308S  | SMG1 phosphatidylinos55 (0.00)      | 90 (0.23)  | 1.07 |
| 12-03 | Gp4 Focus 2 | g.chr8:42407725G>A  | Missense Mutation | SMIM19           | p.D100N  | small integral membran28 (0.00)     | 24 (0.21)  | 0.56 |
| 12-03 | Gp4 Focus 2 | g.chr9:139275843C>T | Splice Site       | SNAPC4           | p.A773A  | small nuclear RNA activ32 (0.00)    | 26 (0.19)  | 0.51 |
| 12-03 | Gp4 Focus 2 | g.chr15:25463809C>T | RNA               | SNHG14           |          | small nucleolar RNA ho70 (0.00)     | 40 (0.17)  | 0.47 |
| 12-03 | Gp4 Focus 2 | g.chr3:43389856G>A  | Missense Mutation | SNRK             | p.G702D  | SNF related kinase 94 (0.00)        | 59 (0.15)  | 0.41 |
| 12-03 | Gp4 Focus 2 | g.chr17:46189435C>T | Silent            | SNX11            | p.N10N   | sorting nexin 11 24 (0.00)          | 33 (0.15)  | 0.40 |
| 12-03 | Gp4 Focus 2 | g.chr2:27598426C>T  | Silent            | SNX17            | p.A276A  | sorting nexin 17 56 (0.00)          | 34 (0.50)  | 1.33 |
| 12-03 | Gp4 Focus 2 | g.chr9:35811780G>A  | Missense Mutation | SPAG8            | p.S88F   | sperm associated antigen23 (0.00)   | 13 (0.38)  | 1.03 |
| 12-03 | Gp4 Focus 2 | g.chr17:47727835G>A | Intron            | SPOP             |          | speckle-type POZ protei15 (0.00)    | 27 (0.30)  | 0.79 |
| 12-03 | Gp4 Focus 2 | g.chr17:47737996C>T | Intron            | SPOP             |          | speckle-type POZ protei56 (0.00)    | 29 (0.21)  | 0.55 |
| 12-03 | Gp4 Focus 2 | g.chr1:153004948C>A | Missense Mutation | SPRR1B           | p.P43T   | small proline-rich protei32 (0.00)  | 21 (0.48)  | 1.27 |
| 12-03 | Gp4 Focus 2 | g.chr1:24995670C>A  | Missense Mutation | SRRM1            | p.P599Q  | serine/arginine repetitiv32 (0.00)  | 35 (0.14)  | 0.38 |
| 12-03 | Gp4 Focus 2 | g.chr15:42927060C>T | Nonsense Mutation | STARD9           | p.Q81*   | StAR-related lipid trans:20 (0.00)  | 44 (0.23)  | 0.61 |
| 12-03 | Gp4 Focus 2 | g.chr19:19119180C>T | Missense Mutation | SUGP2            | p.G799E  | SURP and G patch dom103 (0.00)      | 119 (0.14) | 0.38 |
| 12-03 | Gp4 Focus 2 | g.chr8:70551002C>T  | Silent            | SULF1            | p.G820G  | sulfatase 1 28 (0.00)               | 41 (0.24)  | 0.65 |
| 12-03 | Gp4 Focus 2 | g.chr2:108872087G>A | Silent            | SULT1C3          | p.R153R  | sulfotransferase family, 16 (0.00)  | 28 (0.18)  | 0.66 |
| 12-03 | Gp4 Focus 2 | g.chr7:883146G>A    | Missense Mutation | SUN1             | p.R216K  | Sad1 and UNC84 domai55 (0.00)       | 48 (0.17)  | 0.65 |
| 12-03 | Gp4 Focus 2 | g.chr9:136220643C>T | Missense Mutation | SURF1            | p.G159E  | surfeit 1 50 (0.00)                 | 52 (0.15)  | 0.41 |
| 12-03 | Gp4 Focus 2 | g.chr10:29821708G>A | Missense Mutation | SVIL             | p.P530S  | supervillin 65 (0.00)               | 48 (0.46)  | 1.22 |
| 12-03 | Gp4 Focus 2 | g.chr14:64599079G>T | Missense Mutation | SYNE2            | p.A4730S | spectrin repeat containir49 (0.00)  | 29 (0.24)  | 0.64 |
| 12-03 | Gp4 Focus 2 | g.chr14:64681041C>T | Silent            | SYNE2            | p.L6338L | spectrin repeat containir32 (0.00)  | 42 (0.33)  | 0.89 |
| 12-03 | Gp4 Focus 2 | g.chr17:76166897G>A | Splice Site       | SYNGR2           |          | synaptogyrin 2 58 (0.00)            | 55 (0.24)  | 0.63 |
| 12-03 | Gp4 Focus 2 | g.chr6:149699671G>A | Missense Mutation | TAB2             | p.S207N  | TGF-beta activated kina20 (0.00)    | 56 (0.21)  | 0.68 |
| 12-03 | Gp4 Focus 2 | g.chr17:58094857C>T | lincRNA           | TBC1D3P1-DHX40P1 |          | TBC1D3P1-DHX40P1 1134 (0.01)        | 85 (0.39)  | 1.04 |
| 12-03 | Gp4 Focus 2 | g.chr17:60342444A>G | RNA               | TBC1D3P2         |          | TBC1 domain family, r:67 (0.00)     | 24 (0.25)  | 0.67 |
| 12-03 | Gp4 Focus 2 | g.chr17:80842040G>A | Missense Mutation | TBCD             | p.V499M  | tubulin folding cofactor 161 (0.00) | 31 (0.42)  | 1.12 |
| 12-03 | Gp4 Focus 2 | g.chr17:80858545T>C | Silent            | TBCD             | p.F556F  | tubulin folding cofactor 28 (0.00)  | 32 (0.16)  | 0.42 |
| 12-03 | Gp4 Focus 2 | g.chr19:33292756G>A | Missense Mutation | TDRD12           | p.S725N  | tudor domain containing20 (0.00)    | 48 (0.19)  | 0.50 |

|       |             |                      |                   |          |           |                            |            |            |      |
|-------|-------------|----------------------|-------------------|----------|-----------|----------------------------|------------|------------|------|
| 12-03 | Gp4 Focus 2 | g.chr17:15234625C>T  | Missense Mutation | TEKT3    | p.R93K    | tektin 3                   | 39 (0.00)  | 37 (0.19)  | 0.50 |
| 12-03 | Gp4 Focus 2 | g.chr15:30003155G>A  | Missense Mutation | TJP1     | p.R1342C  | tight junction protein 1   | 35 (0.00)  | 79 (0.11)  | 0.46 |
| 12-03 | Gp4 Focus 2 | g.chr15:30010244G>A  | Missense Mutation | TJP1     | p.H1243Y  | tight junction protein 1   | 72 (0.00)  | 56 (0.14)  | 0.58 |
| 12-03 | Gp4 Focus 2 | g.chr3:52257086C>A   | Missense Mutation | TLR9     | p.W569L   | toll-like receptor 9       | 23 (0.00)  | 28 (0.18)  | 0.48 |
| 12-03 | Gp4 Focus 2 | g.chr17:41365203G>A  | Missense Mutation | TMEM106A | p.C48Y    | transmembrane protein      | 26 (0.00)  | 30 (0.17)  | 0.44 |
| 12-03 | Gp4 Focus 2 | g.chr12:130185004G>A | Missense Mutation | TMEM132D | p.P107S   | transmembrane protein      | 20 (0.00)  | 24 (0.25)  | 1.01 |
| 12-03 | Gp4 Focus 2 | g.chr1:202992083G>A  | Missense Mutation | TMEM183A | p.G349D   | transmembrane protein      | 183 (0.00) | 25 (0.24)  | 0.64 |
| 12-03 | Gp4 Focus 2 | g.chr1:46159154C>T   | Silent            | TMEM69   | p.P107P   | transmembrane protein      | 64 (0.00)  | 37 (0.16)  | 0.43 |
| 12-03 | Gp4 Focus 2 | g.chr9:100353666C>A  | Missense Mutation | TMOD1    | p.Q322K   | tropomodulin 1             | 20 (0.00)  | 48 (0.15)  | 0.39 |
| 12-03 | Gp4 Focus 2 | g.chr12:83250808C>T  | Nonsense Mutation | TMTC2    | p.Q35*    | transmembrane and tetra    | 20 (0.00)  | 50 (0.38)  | 1.60 |
| 12-03 | Gp4 Focus 2 | g.chr9:117852978G>A  | Missense Mutation | TNC      | p.P107L   | tenascin C                 | 97 (0.00)  | 41 (0.20)  | 0.52 |
| 12-03 | Gp4 Focus 2 | g.chr1:201332489C>A  | Nonsense Mutation | TNNT2    | p.E169*   | troponin T type 2 (cardi   | 43 (0.00)  | 64 (0.16)  | 0.42 |
| 12-03 | Gp4 Focus 2 | g.chr16:24788264G>T  | Missense Mutation | TNRC6A   | p.Q58H    | trinucleotide repeat cont  | 182 (0.00) | 45 (0.20)  | 0.53 |
| 12-03 | Gp4 Focus 2 | g.chr22:40711390C>T  | Silent            | TNRC6B   | p.N790N   | trinucleotide repeat cont  | 31 (0.00)  | 34 (0.24)  | 0.63 |
| 12-03 | Gp4 Focus 2 | g.chr17:76063993G>A  | Missense Mutation | TNRC6C   | p.G920R   | trinucleotide repeat cont  | 41 (0.00)  | 54 (0.20)  | 0.54 |
| 12-03 | Gp4 Focus 2 | g.chr2:12863524A>G   | Missense Mutation | TRIB2    | p.M137V   | tribbles pseudokinase 2    | 54 (0.00)  | 23 (0.26)  | 0.70 |
| 12-03 | Gp4 Focus 2 | g.chr4:154217169C>T  | Silent            | TRIM2    | p.D470D   | tripartite motif containir | 41 (0.00)  | 37 (0.24)  | 0.65 |
| 12-03 | Gp4 Focus 2 | g.chr5:180651803G>A  | Silent            | TRIM41   | p.Q268Q   | tripartite motif containir | 48 (0.00)  | 20 (0.40)  | 1.07 |
| 12-03 | Gp4 Focus 2 | g.chr11:5631433T>A   | Missense Mutation | TRIM6    | p.F103I   | tripartite motif containir | 38 (0.00)  | 38 (0.21)  | 0.56 |
| 12-03 | Gp4 Focus 2 | g.chr1:26392814G>A   | Nonsense Mutation | TRIM63   | p.Q93*    | tripartite motif containir | 24 (0.00)  | 17 (0.29)  | 0.78 |
| 12-03 | Gp4 Focus 2 | g.chr21:38567975G>A  | Splice Site       | TTC3     |           | tetratricopeptide repeat   | 20 (0.00)  | 35 (0.17)  | 0.46 |
| 12-03 | Gp4 Focus 2 | g.chr2:179397070G>A  | Missense Mutation | TTN      | p.P34758S | titin                      | 126 (0.00) | 99 (0.15)  | 0.40 |
| 12-03 | Gp4 Focus 2 | g.chr2:179417150G>A  | Silent            | TTN      | p.P30159P | titin                      | 18 (0.00)  | 105 (0.67) | 1.78 |
| 12-03 | Gp4 Focus 2 | g.chr2:179629254C>T  | Splice Site       | TTN      | p.V3330I  | titin                      | 91 (0.00)  | 60 (0.33)  | 0.89 |
| 12-03 | Gp4 Focus 2 | g.chr2:179629262G>C  | Nonsense Mutation | TTN      | p.S3327*  | titin                      | 100 (0.01) | 61 (0.34)  | 0.92 |
| 12-03 | Gp4 Focus 2 | g.chr13:19748059C>T  | Missense Mutation | TUBA3C   | p.E433K   | tubulin, alpha 3c          | 36 (0.00)  | 27 (0.19)  | 0.49 |
| 12-03 | Gp4 Focus 2 | g.chr20:57599157C>G  | Silent            | TUBB1    | p.L225L   | tubulin, beta 1 class VI   | 73 (0.00)  | 27 (0.67)  | 1.78 |
| 12-03 | Gp4 Focus 2 | g.chr7:66703393C>T   | Silent            | TYW1     | p.S692S   | tRNA-yW synthesizing       | 84 (0.00)  | 52 (0.23)  | 1.00 |
| 12-03 | Gp4 Focus 2 | g.chr2:234669144G>A  | Missense Mutation | UGT1A8   | p.G71R    | UDP glucuronosyltransf     | 21 (0.00)  | 45 (0.22)  | 0.59 |
| 12-03 | Gp4 Focus 2 | g.chr15:54305873C>T  | Missense Mutation | UNC13C   | p.T258I   | unc-13 homolog C (C. e     | 24 (0.00)  | 37 (0.19)  | 0.50 |
| 12-03 | Gp4 Focus 2 | g.chr15:91479619G>A  | Missense Mutation | UNC45A   | p.V119M   | unc-45 homolog A (C. e     | 19 (0.00)  | 12 (0.50)  | 1.33 |
| 12-03 | Gp4 Focus 2 | g.chr17:58332538G>A  | Nonsense Mutation | USP32    | p.Q358*   | ubiquitin specific peptid  | 47 (0.00)  | 37 (0.16)  | 0.43 |
| 12-03 | Gp4 Focus 2 | g.chr2:219330847G>A  | Silent            | USP37    | p.N690N   | ubiquitin specific peptid  | 26 (0.00)  | 35 (0.14)  | 0.38 |
| 12-03 | Gp4 Focus 2 | g.chr19:54545441G>A  | Missense Mutation | VSTM1    | p.S166F   | V-set and transmembrar     | 18 (0.00)  | 43 (0.26)  | 0.68 |
| 12-03 | Gp4 Focus 2 | g.chr10:50256581G>A  | Silent            | VSTM4    | p.P239P   | V-set and transmembrar     | 56 (0.02)  | 33 (0.30)  | 0.81 |

|       |             |                      |                   |         |         |                          |            |            |      |
|-------|-------------|----------------------|-------------------|---------|---------|--------------------------|------------|------------|------|
| 12-03 | Gp4 Focus 2 | g.chr10:122618179C>T | Missense Mutation | WDR11   | p.H75Y  | WD repeat domain 11      | 15 (0.00)  | 27 (0.19)  | 0.49 |
| 12-03 | Gp4 Focus 2 | g.chr1:85587443G>A   | Missense Mutation | WDR63   | p.V643M | WD repeat domain 63      | 46 (0.00)  | 28 (0.36)  | 0.95 |
| 12-03 | Gp4 Focus 2 | g.chr1:27622882C>A   | Missense Mutation | WDTC1   | p.H313Q | WD and tetratricopeptid  | 73 (0.00)  | 45 (0.22)  | 0.59 |
| 12-03 | Gp4 Focus 2 | g.chr4:6302761C>T    | Silent            | WFS1    | p.F413F | Wolfram syndrome 1 (w    | 38 (0.00)  | 19 (0.26)  | 0.70 |
| 12-03 | Gp4 Focus 2 | g.chr7:5257582C>T    | Silent            | WIPI2   | p.D184D | WD repeat domain, pho    | 39 (0.00)  | 31 (0.19)  | 0.76 |
| 12-03 | Gp4 Focus 2 | g.chr3:39229551C>A   | Silent            | XIRP1   | p.G462G | xin actin-binding repeat | 45 (0.00)  | 36 (0.36)  | 0.96 |
| 12-03 | Gp4 Focus 2 | g.chr22:42059771G>A  | Silent            | XRCC6   | p.L594L | X-ray repair complemer   | 47 (0.00)  | 24 (0.21)  | 0.56 |
| 12-03 | Gp4 Focus 2 | g.chr7:100373152C>T  | RNA               | ZAN     |         | zonadhesin (gene/pseud   | 36 (0.00)  | 20 (0.25)  | 0.67 |
| 12-03 | Gp4 Focus 2 | g.chr22:50277537C>T  | Missense Mutation | ZBED4   | p.S76F  | zinc finger, BED-type c  | 28 (0.00)  | 74 (0.16)  | 0.43 |
| 12-03 | Gp4 Focus 2 | g.chr11:62519590A>G  | Missense Mutation | ZBTB3   | p.F566S | zinc finger and BTB do   | 45 (0.00)  | 32 (0.41)  | 1.08 |
| 12-03 | Gp4 Focus 2 | g.chr1:22817964G>A   | Missense Mutation | ZBTB40  | p.V257I | zinc finger and BTB do   | 84 (0.00)  | 32 (0.31)  | 0.83 |
| 12-03 | Gp4 Focus 2 | g.chr1:52941017C>T   | Silent            | ZCCHC11 | p.S738S | zinc finger, CCHC dom    | 100 (0.00) | 69 (0.14)  | 0.39 |
| 12-03 | Gp4 Focus 2 | g.chr19:44662041C>T  | Silent            | ZNF234  | p.Y624Y | zinc finger protein 234  | 40 (0.00)  | 101 (0.35) | 0.92 |
| 12-03 | Gp4 Focus 2 | g.chr19:21719827G>A  | Silent            | ZNF429  | p.R324R | zinc finger protein 429  | 21 (0.00)  | 23 (0.30)  | 0.81 |
| 12-03 | Gp4 Focus 2 | g.chr19:21606879C>A  | Missense Mutation | ZNF493  | p.S473Y | zinc finger protein 493  | 15 (0.00)  | 43 (0.16)  | 0.43 |
| 12-03 | Gp4 Focus 2 | g.chr19:37441970G>A  | Missense Mutation | ZNF568  | p.E639K | zinc finger protein 568  | 21 (0.00)  | 35 (0.14)  | 0.38 |
| 12-03 | Gp4 Focus 2 | g.chr19:42585365G>A  | Silent            | ZNF574  | p.E869E | zinc finger protein 574  | 26 (0.00)  | 22 (0.27)  | 0.73 |
| 12-03 | Gp4 Focus 2 | g.chr7:57522288C>T   | Silent            | ZNF716  | p.S54S  | zinc finger protein 716  | 44 (0.00)  | 88 (0.14)  | 0.60 |
| 12-03 | Gp4 Focus 2 | g.chr19:22498639G>A  | Nonsense Mutation | ZNF729  | p.W807* | zinc finger protein 729  | 28 (0.00)  | 39 (0.15)  | 0.41 |
| 12-03 | Gp4 Focus 2 | g.chr14:102802148G>T | Missense Mutation | ZNF839  | p.Q544H | zinc finger protein 839  | 66 (0.00)  | 71 (0.20)  | 0.53 |
| 12-03 | Gp4 Focus 2 | g.chr20:47870345G>A  | Missense Mutation | ZNFX1   | p.A988V | zinc finger, NFX1-type   | 49 (0.00)  | 79 (0.16)  | 0.44 |
| 12-03 | Gp4 Focus 2 | g.chr19:56758152C>G  | Silent            | ZSCAN5D | p.V260V |                          | 21 (0.00)  | 31 (0.26)  | 0.69 |
| 12-03 | Gp4 Focus 2 | g.chr1:45553773G>A   | Silent            | ZSWIM5  | p.Y244Y | zinc finger, SWIM-type   | 20 (0.00)  | 64 (0.27)  | 0.71 |
