# Supplementary material
Source: PubMed Central journal article supplement (PMC5511561)
Supplement: NIHMS847247-supplement-5.pdf [file NIHMS847247-supplement-5.pdf]

**Supplementary Table S5. Resequencing of a subset of focal mutations.** For each mutation shown, the total number of reads covering each position and the number of reads confirming the alteration are shown. Also shown are the locus-specific sequences of the primer pairs for each alteration. Loci that failed to amplify during verification are omitted from this list. The boldface read depth indicates the focus with the mutated allele. 23 of 28 loci (82%) verified successfully.

| Case  | Clonality | Chr | Position  | Gene Symbol   | Ref | Alt | Effect     | Norm Cov | Gp3 Cov | Gp4 Focus 1 Cov | Gp4 Focus 2 Cov | Norm Alt Reads | Gp3 Alt Reads | Gp4 Focus 1 Alt Read | Gp4 Focus 2 Alt Reads | Forward Seq                            | Reverse Seq                         |
|-------|-----------|-----|-----------|---------------|-----|-----|------------|----------|---------|-----------------|-----------------|----------------|---------------|----------------------|-----------------------|----------------------------------------|-------------------------------------|
| 10-01 | Focal     | 3   | 39374844  | <i>CCR8</i>   | G   | A   | Coding     | 642      | 1234    | 3010            | N/A             | 0              | 2             | <b>646</b>           | N/A                   | CTCACTGC<br>TGTTGTGAA<br>CCCTGTTA<br>T | ATGTAGTC<br>TACGCTGG<br>AGGAACG     |
| 10-01 | Focal     | 4   | 70359441  | <i>UGT2B4</i> | G   | A   | Non-coding | 8125     | 6055    | 11184           | N/A             | 4              | <b>3</b>      | 8                    | N/A                   | TCGTA CTG<br>AAACTTCA<br>AAGCAGAC<br>A | TGAGACA<br>ATGGCAA<br>AAGCTGAC<br>A |
| 11-01 | Focal     | 3   | 52404493  | <i>DNAH1</i>  | G   | A   | Non-coding | 2378     | 31065   | 1157            | N/A             | 54             | 581           | <b>21</b>            | N/A                   | CAAAGCTG<br>TGTAGCAG<br>AGGTCA         | CGCTCCAG<br>ATCAGGG<br>AGAAGAT<br>G |
| 11-01 | Focal     | 5   | 137762882 | <i>KDM3B</i>  | G   | T   | Coding     | 28757    | 223928  | 49769           | N/A             | 103            | <b>216714</b> | 153                  | N/A                   | GTGTCATC<br>TTCAGAAG<br>CCATCACA<br>A  | GCTAGGTA<br>GCCTAGAG<br>GCCAGATT    |
| 11-01 | Focal     | 22  | 36205898  | <i>RBFOX2</i> | G   | A   | Coding     | 8051     | 646     | 6069            | N/A             | 3              | 0             | <b>1114</b>          | N/A                   | TGATTGCC<br>ATGCATCC<br>TTCCATT        | CGCAGAAT<br>GGAATTCC<br>CACAGA      |
| 11-02 | Focal     | 16  | 71807237  | <i>APIG1</i>  | G   | A   | Coding     | 965      | 5295    | 10743           | 19701           | 1              | <b>4095</b>   | 10                   | 19                    | AAGAGTTG<br>GAGGTTTT<br>CAGGAGCT<br>T  | TCTTGGGG<br>AGCACCA<br>GGCT         |
| 11-02 | Focal     | X   | 154348368 | <i>BRCC3</i>  | G   | A   | Silent     | 1183     | 252     | 22370           | 106             | 27             | 16            | <b>17917</b>         | 6                     | ATGTCGGC<br>AGTCAGCG<br>GG             | GCTGTGTG<br>CATTTTCA<br>GACTGTGT    |
| 11-02 | Focal     | 5   | 1278807   | <i>TERT</i>   | G   | A   | Silent     | 1454     | 11070   | 5798            | 1011            | 0              | <b>7928</b>   | 6                    | 11                    | ATCCTGGA<br>CACGACTA<br>TCACACG        | TCACACAG<br>GTGGATGT<br>GACGG       |

|       |       |    |           |               |   |   |            |        |        |        |     |     |              |              |     |                                       |                                       |
|-------|-------|----|-----------|---------------|---|---|------------|--------|--------|--------|-----|-----|--------------|--------------|-----|---------------------------------------|---------------------------------------|
| 11-03 | Focal | 16 | 84158313  | <i>HSDL1</i>  | C | T | Coding     | 128154 | 91788  | 264807 | N/A | 66  | 55           | <b>57465</b> | N/A | AGGTTCCC<br>AGGAGTTG<br>GCAAAA        | TCCTTCAG<br>TGTTGATT<br>TTGGGTTC<br>T |
| 11-03 | Focal | 5  | 65466776  | <i>SREK1</i>  | G | A | Non-coding | 127    | 719    | 375    | N/A | 0   | 1            | <b>205</b>   | N/A | ACAGGACA<br>AAGAAAA<br>GGAACGA<br>GAA | CCAATTGT<br>CATCAGCA<br>AATCCCTT      |
| 11-03 | Focal | 22 | 37603492  | <i>SSTR3</i>  | G | A | Silent     | 14797  | 97847  | 35791  | N/A | 12  | <b>23313</b> | 14           | N/A | GCGGTCCA<br>CGCTCATG<br>ACA           | GCCCTTCA<br>GTCACCAA<br>CGTCT         |
| 11-03 | Focal | 1  | 118483775 | <i>WDR3</i>   | C | T | Coding     | 25601  | 64346  | 94281  | N/A | 144 | 90           | <b>84290</b> | N/A | TCTGCTCT<br>TGCTTCTT<br>CTGTAGC       | TGAGTGTT<br>TGGAAGG<br>AACAGCCT<br>A  |
| 11-10 | Focal | 4  | 143393616 | <i>INPP4B</i> | T | C | Non-coding | 4818   | 12664  | 9931   | N/A | 9   | <b>3722</b>  | 19           | N/A | TCAGTGAT<br>ACCGAACC<br>CAGTAAGT      | TCTGAGGC<br>ACTGGTAT<br>TGGGGA        |
| 11-10 | Focal | 7  | 77740060  | <i>MAGI2</i>  | A | G | Non-coding | 125    | 278    | 877    | N/A | 0   | <b>102</b>   | 0            | N/A | TTCTCCCT<br>TTGTATGG<br>GCTCTACT<br>T | TGTCAGAC<br>CCTGTCCC<br>CTTCTT        |
| 11-10 | Focal | 11 | 4615225   | <i>OR52I1</i> | T | C | Coding     | 1520   | 1968   | 4919   | N/A | 2   | 0            | <b>1114</b>  | N/A | TTTTCTGA<br>TCCTGCCA<br>TACCACC       | CCACAAG<br>GAGGAAG<br>GAGGCA          |
| 11-10 | Focal | 4  | 142152631 | <i>ZNF330</i> | C | T | Coding     | 6096   | 7124   | 7858   | N/A | 6   | 119          | <b>3083</b>  | N/A | TTCCATTG<br>CAAGCTTT<br>TAGTGATT<br>T | CCAAGGA<br>CTGGTGGA<br>GGGGTA         |
| 11-12 | Focal | 9  | 124408123 | <i>DAB2IP</i> | G | A | Non-coding | 51375  | 201033 | 115602 | N/A | 208 | <b>71899</b> | 67           | N/A | AGCTTCCC<br>CCGTTCCAT<br>CAGTTT       | GCTCACCT<br>CCCAGAG<br>ATTCCATC       |
| 11-12 | Focal | 2  | 48018181  | <i>MSH6</i>   | T | C | Coding     | 1596   | 332    | 46     | N/A | 3   | <b>170</b>   | 0            | N/A | GGTTACCC<br>CTGGTGCC<br>CTTG          | TGGCAGTA<br>GTGACTCT<br>TACCTGT       |
| 11-12 | Focal | 9  | 115759765 | <i>ZNF883</i> | G | A | Non-coding | 80097  | 563053 | 46350  | N/A | 36  | 123          | <b>17262</b> | N/A | AGGTGTGT<br>ACTTCGAC<br>TGAAGGTT      | GCTTTCAG<br>CCATACCC<br>CAGC          |

|       |       |    |           |                |   |   |            |        |        |        |      |     |              |              |     |                                       |                                  |
|-------|-------|----|-----------|----------------|---|---|------------|--------|--------|--------|------|-----|--------------|--------------|-----|---------------------------------------|----------------------------------|
| 11-13 | Focal | 4  | 25005261  | <i>LGI2</i>    | A | G | Coding     | 22011  | 78380  | 388991 | N/A  | 9   | <b>12977</b> | 341          | N/A | GACAGCTG<br>TGAATGAA<br>CGAGGC        | AGCAGTTT<br>GTGGAGAT<br>CCAAGCTC |
| 11-13 | Focal | 1  | 36755226  | <i>THRAP3</i>  | C | A | Coding     | 12386  | 1116   | 28     | N/A  | 14  | <b>508</b>   | 0            | N/A | AAGAGAA<br>GCGAAGGT<br>GGGCA          | CGGACATT<br>GACCTGTG<br>CCTC     |
| 11-14 | Focal | 2  | 27306488  | <i>EMILINI</i> | C | T | Silent     | 41996  | 338349 | 73739  | N/A  | 44  | 171          | <b>70010</b> | N/A | TGAGGTTA<br>TTCTCAGC<br>TTCAGCTC<br>C | CTCGGAAG<br>CGCTCTTC<br>ACTCTCT  |
| 11-14 | Focal | 1  | 9777144   | <i>PIK3CD</i>  | C | T | Coding     | 129467 | 48363  | 100199 | N/A  | 85  | 26           | <b>60380</b> | N/A | GTCCATTC<br>CTCCTCCA<br>TCCTCG        | CATGGCCA<br>GTAGCACA<br>TGGAGT   |
| 12-01 | Focal | 9  | 138709867 | <i>CAMSAPI</i> | C | T | Silent     | 180353 | 149670 | 185219 | N/A  | 291 | 200          | <b>59035</b> | N/A | TAATCAGG<br>AAGTCCCA<br>CCCTGC        | GTTTCTGT<br>CTCTGGCA<br>GCTGATAA |
| 12-02 | Focal | 7  | 82579281  | <i>PCLO</i>    | T | A | Silent     | 124065 | 59811  | 8533   | N/A  | 33  | 13           | <b>1</b>     | N/A | TGAGGACT<br>TTGTGTGT<br>CTGAATCT<br>G | CCAGCATA<br>GCAGTTCA<br>AACGGT   |
| 12-02 | Focal | 9  | 125760971 | <i>RABGAP1</i> | T | C | Coding     | 25404  | 2232   | 5994   | N/A  | 9   | 2            | <b>0</b>     | N/A | AGGAGCCT<br>GTTCGATT<br>TCTCCTG       | TCAGCCTC<br>AGACGTG<br>ATTTCTCC  |
| 12-02 | Focal | 12 | 122404860 | <i>WDR66</i>   | G | A | Non-coding | 7388   | 1472   | 7461   | N/A  | 24  | 3            | <b>7</b>     | N/A | CCCGACCA<br>AAGAATCT<br>TAAAACCT      | AGCGCTGT<br>TACCTTGT<br>CTCTGT   |
| 12-03 | Focal | 7  | 129350236 | <i>NRF1</i>    | G | A | Coding     | 121841 | 15082  | 39024  | 8709 | 389 | <b>14638</b> | 80           | 22  | AGCTGCTT<br>ATTGCATA<br>TTGGGACT<br>A | GTGGCTGT<br>GGCCTGTG<br>TTTG     |

**Supplementary Table S6.** Subclonal mutations shared by two foci of Gp4 but not Gp3. For each focus with three foci of tumor sequenced, all somatic mutations shared by both foci of Gp4 tumor (but not shared by a clonal focus of Gp3 tumor) are shown. Mutations were considered shared between foci of Gp4 if found in at least one focus of Gp4 at high confidence and present at any frequency in the second focus, as well as not detected in the Gp3 and benign foci. To avoid misclassifying truncal mutations or undercovered germline SNP as Gp4-only, mutations were considered absent from the benign and Gp3 only if the other foci were covered at comparable coverage. Also shown is the reference and alternative allele depth, frequencies, and computed cancer cell fraction (CCF) for each focus and the matched benign control.

| Case  | Genomic Coordinate   | Classification    | Gene Symbol | Effect   | Description                                                          | Normal coverage (freq.) | Gp4 Focus                |                          | Gp4 Focus             |                       |
|-------|----------------------|-------------------|-------------|----------|----------------------------------------------------------------------|-------------------------|--------------------------|--------------------------|-----------------------|-----------------------|
|       |                      |                   |             |          |                                                                      |                         | 1 tumor coverage (freq.) | 2 tumor coverage (freq.) | Gp4 Focus 1 tumor CCF | Gp4 Focus 2 tumor CCF |
| 11-02 | g.chr3:1425032G>A    | Missense Mutation | CNTN6       | p.M819I  | contactin 6                                                          | 73 (0.01)               | 47 (0.15)                | 23 (0.26)                | 0.40                  | 0.70                  |
| 11-02 | g.chr2:160698852G>A  | Silent            | LY75-CD302  | p.L1062L | LY75-CD302 readthrough                                               | 23 (0.00)               | 29 (0.14)                | 22 (0.23)                | 0.37                  | 0.61                  |
| 11-02 | g.chr7:78263867G>A   | Intron            | MAGI2       |          | membrane associated guanylate kinase, WW and PDZ domain containing 2 | 65 (0.00)               | 64 (0.09)                | 56 (0.14)                | 0.25                  | 0.38                  |
| 12-03 | g.chr21:39975901G>A  | Intron            | ERG         |          | v-ets avian erythroblastosis virus E26 oncogene homolog              | 19 (0.00)               | 11 (0.82)                | 18 (0.67)                | 2.18                  | 1.78                  |
| 12-03 | g.chr1:42049343C>T   | Missense Mutation | HIVEP3      | p.D376N  | human immunodeficiency virus type 1 enhancer binding protein 3       | 73 (0.00)               | 64 (0.27)                | 6 (0.50)                 | 0.88                  | 1.33                  |
| 12-03 | g.chr12:108917408C>A | Missense Mutation | SART3       | p.R906S  | squamous cell carcinoma antigen recognized by T cells 3              | 18 (0.00)               | 24 (0.25)                | 15 (0.27)                | 0.67                  | 0.71                  |

**Supplementary Table S7. Genes with at least two-fold change between Gp4 and Gp3.** Linear values for each gene were transformed into fold change values (Gp4 divided by Gp3) and fold change values were averaged. Average fold change values greater than 2 or less than -2 are shown. Student's paired *t*-test was performed; data is sorted by *P* value.

| <b>mRNA ID</b> | <b>Gene Symbol</b> | <b>Average Fold Change (Gp4 vs Gp3)</b> | <b>P Value</b> |
|----------------|--------------------|-----------------------------------------|----------------|
| NR_037962      | RHOU               | 3.863098279                             | 0.0014         |
| NM_004522      | KIF5C              | 2.170975394                             | 0.0017         |
| NM_001040113   | MYH11              | -2.875613766                            | 0.0040         |
| NR_034105      | CRNDE              | 2.054563765                             | 0.0082         |
| NM_001012977   | PABPC1L2A          | -2.250521295                            | 0.0097         |
| NM_001040665   | STEAP2             | 2.044580245                             | 0.0097         |
| NM_001256410   | RAB18              | 2.302530358                             | 0.0159         |
| NM_000414      | HSD17B4            | 2.677735667                             | 0.0193         |
| NM_030939      | C6orf62            | 2.390670598                             | 0.0212         |
| NR_002576      | SNORA21            | -2.236589128                            | 0.0224         |
| NM_016192      | TMEFF2             | 5.010114016                             | 0.0230         |
| NM_002628      | PFN2               | 2.015491998                             | 0.0267         |
| NM_213674      | TPM2               | -2.812618784                            | 0.0288         |
| NM_001205315   | STEAP4             | 2.068694755                             | 0.0291         |
| NM_004569      | PIGH               | 2.103350172                             | 0.0297         |
| NM_001141945   | ACTA2              | -2.072392092                            | 0.0299         |
| NM_001634      | AMD1               | 3.317847997                             | 0.0313         |
| NM_001154      | ANXA5              | 2.309493215                             | 0.0418         |
| NM_001014986   | FOLH1              | 4.806463722                             | 0.0437         |
| NM_153826      | CD46               | 2.190651077                             | 0.0467         |
| NM_006708      | GLO1               | 3.612848414                             | 0.0480         |
| NR_045562      | GULP1              | 2.483435589                             | 0.0521         |
| NM_001203      | BMPR1B             | 2.070588472                             | 0.0527         |
| NM_004521      | KIF5B              | 2.12810031                              | 0.0528         |
| NM_015076      | CDK19              | 2.290294025                             | 0.0546         |
| NM_005013      | NUCB2              | 2.2880836                               | 0.0576         |
| NM_000905      | NPY                | 5.976453258                             | 0.0577         |
| NM_006198      | PCP4               | -5.162221863                            | 0.0631         |
| NM_001257391   | CD63               | 2.129084745                             | 0.0717         |
| NM_000240      | MAOA               | 3.53583713                              | 0.0820         |
| NM_001242915   | ZFAND6             | 3.239059016                             | 0.0827         |
| NM_016497      | MRPL51             | 10.46164199                             | 0.0899         |
| NM_004374      | COX6C              | 2.121945085                             | 0.1042         |
| NM_001277198   | CNIH4              | 2.051503886                             | 0.1064         |
| NM_003676      | DEGS1              | 3.765565708                             | 0.1101         |
| NM_003299      | HSP90B1            | 2.060209166                             | 0.1109         |
| NM_001220473   | PPFIA2             | 3.320098095                             | 0.1122         |
| NM_007008      | RTN4               | 4.435015606                             | 0.1123         |
| NR_104319      | SCHLAP1            | 2.784417015                             | 0.1155         |
| NM_004766      | COPB2              | 2.202044039                             | 0.1187         |
| NM_024312      | GNPTAB             | 5.854525403                             | 0.1395         |
| NM_030774      | OR51E2             | 4.391844706                             | 0.1547         |
| NM_015243      | VPS13B             | 2.961494585                             | 0.1559         |
| NM_006267      | RANBP2             | 2.901920817                             | 0.1709         |
| NM_001243797   | TSC22D1            | 2.390604371                             | 0.1717         |
| NR_001575      | RNF138P1           | 2.839981992                             | 0.1759         |
| NM_000214      | JAG1               | 2.82802586                              | 0.1783         |

|              |           |              |        |
|--------------|-----------|--------------|--------|
| NM_001005474 | NFKBIZ    | 4.278067537  | 0.1797 |
| NM_001024629 | NRP1      | 2.011674456  | 0.1950 |
| NM_020188    | CMC2      | 3.321581506  | 0.1983 |
| NM_025087    | CWH43     | 2.09590401   | 0.1993 |
| NM_004654    | USP9Y     | 2.584481045  | 0.1997 |
| NM_001037495 | DYNLL1    | 2.271146646  | 0.2049 |
| NR_015401    | LINC00957 | 2.732038306  | 0.2089 |
| NM_001271594 | SESN3     | 2.46005016   | 0.2090 |
| NM_003711    | PPAP2A    | 2.855377388  | 0.2138 |
| NM_002923    | RGS2      | 2.779722772  | 0.2243 |
| NR_015342    | PCA3      | -13.74152767 | 0.2297 |
| NR_000009    | SNORD4B   | -2.459011511 | 0.2317 |
| NM_001677    | ATP1B1    | 2.001961571  | 0.2406 |
| NR_002440    | SNORD16   | -2.204282113 | 0.2467 |
| NM_018584    | CAMK2N1   | 4.60631125   | 0.2485 |
| NM_001003712 | OSBPL8    | 2.119553286  | 0.2705 |
| NM_001015038 | PAGE2B    | -2.349273947 | 0.2765 |
| NM_001195100 | PTP4A2    | 2.691204005  | 0.2783 |
| NR_000017    | SNORD36B  | -4.380495431 | 0.2834 |
| NM_000300    | PLA2G2A   | 3.68168087   | 0.3021 |
| NR_038400    | LINC00308 | 5.615114468  | 0.3113 |
| NM_181617    | KRTAP21-2 | -2.628813445 | 0.3114 |
| NR_002559    | SNORD29   | -10.94592177 | 0.3144 |
| NM_002298    | LCP1      | 3.507951401  | 0.3219 |
| NM_022170    | EIF4H     | -2.948698618 | 0.3261 |
| NR_046944    | RNU6-78P  | -4.117813566 | 0.3379 |
| NM_001282480 | PRKG2     | 3.393207252  | 0.3387 |
| NM_000110    | DPYD      | 5.21862161   | 0.3405 |
| NR_002959    | SNORA18   | -10.97243149 | 0.3423 |
| NM_001003799 | TARP      | 3.128707867  | 0.3465 |
| NM_001033019 | DEFB134   | -3.358009359 | 0.3544 |
| NR_004403    | SNORD97   | -2.845224212 | 0.3555 |
| NM_003725    | HSD17B6   | -2.034220518 | 0.3588 |
| NM_001012456 | SEC61G    | 2.523303307  | 0.3632 |
| NM_001190986 | CRISP3    | 13.69443938  | 0.3662 |
| NR_002564    | SNORD26   | -6.350675905 | 0.3756 |
| NR_003140    | SNORD117  | -2.28378835  | 0.3804 |
| NR_002561    | SNORD30   | -7.992724794 | 0.3859 |
| NR_002956    | SNORA14B  | -25.5027109  | 0.3908 |
| NR_038903    | RAB30-AS1 | -2.440090795 | 0.3946 |
| NM_001136154 | ERG       | 2.348746503  | 0.4108 |
| NR_003033    | SNORD5    | 2.729914108  | 0.4391 |
| NM_001254718 | MYBPC1    | -2.164278745 | 0.4541 |
| NM_005345    | HSPA1A    | 3.752231853  | 0.4547 |
| NM_003528    | HIST2H2BE | 4.914879194  | 0.4582 |
| NM_022132    | MCCC2     | 3.04405036   | 0.5491 |
| NR_002447    | SNORD24   | -20.22256652 | 0.5907 |
| NR_024387    | CXADRP2   | -2.624408588 | 0.6742 |
| NM_001008    | RPS4Y1    | 2.36943954   | 0.7224 |
| NR_002962    | SNORA23   | -2.050110027 | 0.7878 |
| NM_014917    | NTNG1     | -2.15483043  | 0.8797 |
| NR_002572    | SNORD58B  | 3.011467142  | 0.9559 |
| NM_058186    | FAM3B     | -2.78083161  | 0.9936 |

**Supplementary Table S8. Gene Expression Omnibus (GEO) and Sequence Read Archive (SRA) accession identification numbers.** For each case and tumor/normal tissue reported in this paper, the GEO and SRA accession identification numbers for each case is reported.

| <b>Study ID</b> | <b>Focus</b> | <b>GEO</b> | <b>SRA</b> |
|-----------------|--------------|------------|------------|
| 10-01           | N            |            | SRX290885  |
| 10-01           | Gp3          |            | SRX290886  |
| 10-01           | Gp4          |            | SRX290887  |
| 11-01           | N            |            | SRX290528  |
| 11-01           | Gp3          |            | SRX290531  |
| 11-01           | Gp4          |            | SRX290532  |
| 11-02           | N            |            | SRX288309  |
| 11-02           | Gp3          |            | SRX288310  |
| 11-02           | Gp4 Focus 1  |            | SRX288447  |
| 11-02           | Gp4 Focus 2  |            | SRX288448  |
| 11-03           | N            |            | SRX295000  |
| 11-03           | Gp3          | GSM1269835 | SRX295001  |
| 11-03           | Gp4          | GSM1269836 | SRX295002  |
| 11-04           | Gp3          | GSM1269837 |            |
| 11-04           | Gp4          | GSM1269838 |            |
| 11-05           | Gp3          | GSM1269839 |            |
| 11-05           | Gp4          | GSM1269840 |            |
| 11-06           | Gp3          | GSM1269841 |            |
| 11-06           | Gp4          | GSM1269842 |            |
| 11-07 Area 1    | Gp3          | GSM1269843 |            |
| 11-07 Area 1    | Gp4          | GSM1269844 |            |
| 11-07 Area 2    | Gp3          | GSM1269845 |            |
| 11-07 Area 2    | Gp4          | GSM1269846 |            |
| 11-09           | Gp3          | GSM1269847 |            |
| 11-09           | Gp4          | GSM1269848 |            |
| 11-10           | N            |            | SRX315064  |
| 11-10 Area 1    | Gp3          |            | SRX315065  |
| 11-10 Area 1    | Gp4          |            | SRX315067  |
| 11-10 Area 2    | Gp3          |            | SRX315068  |
| 11-10 Area 2    | Gp4          |            | SRX315069  |
| 11-12           | N            |            | SRX297101  |
| 11-12           | Gp3          | GSM1269849 | SRX297102  |
| 11-12           | Gp4          | GSM1269850 | SRX297103  |
| 11-13           | N            |            | SRX298673  |
| 11-13           | Gp3          | GSM1269853 | SRX298674  |
| 11-13           | Gp4          | GSM1269854 | SRX298675  |
| 11-14           | N            |            | SRX298261  |
| 11-14           | Gp3          | GSM1269851 | SRX298262  |
| 11-14           | Gp4          | GSM1269852 | SRX298263  |
| 12-01           | N            |            | SRX300927  |
| 12-01           | Gp3          | GSM1269859 | SRX300942  |
| 12-01           | Gp4          | GSM1269860 | SRX300943  |
| 12-02           | N            |            | SRX304896  |
| 12-02           | Gp3          | GSM1269857 | SRX304897  |
| 12-02           | Gp4          | GSM1269858 | SRX304898  |
| 12-03           | N            |            | SRX309628  |
| 12-03           | Gp3          | GSM1269855 | SRX309630  |
| 12-03           | Gp4 Focus 1  | GSM1269856 | SRX309631  |
| 12-03           | Gp4 Focus 2  |            | SRX309633  |

**Supplementary Table S9. Exome sequencing metrics for each library.** For each library, the version of the Agilent SureSelect Exome library is shown. Also shown: the size of the custom bait library (in bases), the number of pass-filter reads for each library (in reads), the percentage of targets covered at 2x, 10x, 20x, 30x, 40x, 50x and 100x coverage, and the total number of unique library molecules.

| Sample            | Exome Version | Size of Custom Content | Genome Size | Number of bases in bait library | Number of bases in target regions | Pass Filter Reads | Unique Pass Filter Reads | Percent Unique Reads | Unique Aligned Pass Filter Reads | Percent of Unique Pass Filter Reads Aligned | Bases aligned in pass filter reads | Pass filter aligned bases | Bases Mapped Near Baits | Based Mapped Far From Baits |
|-------------------|---------------|------------------------|-------------|---------------------------------|-----------------------------------|-------------------|--------------------------|----------------------|----------------------------------|---------------------------------------------|------------------------------------|---------------------------|-------------------------|-----------------------------|
| 10-01 Gp3 Focus 1 | 3             | 5998080                | 3137161264  | 57635363                        | 57633968                          | 96855342          | 72120797                 | 0.744624             | 65106647                         | 0.902744                                    | 6298730912                         | 2354133090                | 826258073               | 3118339749                  |
| 10-01 Gp4 Focus 1 | 3             | 5998080                | 3137161264  | 57635363                        | 57633968                          | 108183314         | 79630565                 | 0.736071             | 71704287                         | 0.900462                                    | 6921799623                         | 2607936925                | 939168602               | 3374694096                  |
| 10-01 N           | 3             | 5998080                | 3137161264  | 57635363                        | 57633968                          | 106016624         | 74597322                 | 0.703638             | 67015059                         | 0.898357                                    | 6460939014                         | 2410803700                | 843500621               | 3206634693                  |
| 11-01 Gp3 Focus 1 | 3             | 5998080                | 3137161264  | 57635363                        | 57633968                          | 84999748          | 47860015                 | 0.563061             | 42182021                         | 0.881362                                    | 3919835064                         | 1505856050                | 356310237               | 2057668777                  |
| 11-01 Gp4 Focus 1 | 3             | 5998080                | 3137161264  | 57635363                        | 57633968                          | 133362450         | 96086844                 | 0.720494             | 85276377                         | 0.887493                                    | 7994292336                         | 3148444882                | 912086763               | 3933760691                  |
| 11-01 N           | 3             | 5998080                | 3137161264  | 57635363                        | 57633968                          | 88339758          | 64213475                 | 0.726892             | 57632702                         | 0.897517                                    | 5412483554                         | 2179317915                | 611044489               | 2622121150                  |
| 11-02 Gp3 Focus 1 | 3             | 5998080                | 3137161264  | 57635363                        | 57633968                          | 126569422         | 64434030                 | 0.509081             | 57023378                         | 0.884989                                    | 5479724157                         | 1648752996                | 508147189               | 3322823972                  |
| 11-02 Gp4 Focus 1 | 3             | 5998080                | 3137161264  | 57635363                        | 57633968                          | 105816302         | 60876503                 | 0.575304             | 53321731                         | 0.8759                                      | 5013694108                         | 1602513492                | 519382660               | 2891797956                  |
| 11-02 Gp4 Focus 2 | 5             | 3901294                | 3137161264  | 54413025                        | 56496747                          | 81239684          | 39297519                 | 0.483723             | 31008668                         | 0.789074                                    | 2858970143                         | 608885919                 | 282035763               | 1968048461                  |
| 11-02 N           | 3             | 5998080                | 3137161264  | 57635363                        | 57633968                          | 75039912          | 47427374                 | 0.632029             | 42408690                         | 0.894182                                    | 4061324237                         | 1455319343                | 485537466               | 2120467428                  |
| 11-03 Gp3 Focus 1 | 3             | 5998080                | 3137161264  | 57635363                        | 57633968                          | 63239466          | 51520002                 | 0.814681             | 43173311                         | 0.837991                                    | 4036699998                         | 785655536                 | 318045888               | 2932998574                  |
| 11-03 Gp4 Focus 1 | 3             | 5998080                | 3137161264  | 57635363                        | 57633968                          | 35923872          | 27013101                 | 0.751954             | 23136672                         | 0.856498                                    | 2160228375                         | 667164098                 | 239063277               | 1254001000                  |
| 11-03 N           | 3             | 5998080                | 3137161264  | 57635363                        | 57633968                          | 53232944          | 36491534                 | 0.685507             | 32300289                         | 0.885145                                    | 3085926182                         | 898133174                 | 370530551               | 1817262457                  |
| 11-10 Gp3 Focus 1 | 3             | 5998080                | 3137161264  | 57635363                        | 57633968                          | 96568478          | 72904012                 | 0.754946             | 62007703                         | 0.850539                                    | 5829322028                         | 1813298385                | 559882403               | 3456141240                  |
| 11-10 Gp3 Focus 2 | 3             | 5998080                | 3137161264  | 57635363                        | 57633968                          | 73830878          | 30751756                 | 0.416516             | 21477581                         | 0.698418                                    | 1809295652                         | 657977352                 | 221367010               | 929951290                   |
| 11-10 Gp4 Focus 1 | 3             | 5998080                | 3137161264  | 57635363                        | 57633968                          | 80954012          | 55331259                 | 0.68349              | 47186299                         | 0.852796                                    | 4408368248                         | 1355503684                | 420501897               | 2632362667                  |
| 11-10 Gp4 Focus 2 | 3             | 5998080                | 3137161264  | 57635363                        | 57633968                          | 71924476          | 38915918                 | 0.541066             | 29597594                         | 0.760552                                    | 2432078924                         | 738047268                 | 255056129               | 1438975527                  |
| 11-10 N           | 3             | 5998080                | 3137161264  | 57635363                        | 57633968                          | 110170342         | 70102706                 | 0.636312             | 62586617                         | 0.892785                                    | 6027896201                         | 2003440974                | 587277749               | 3437177478                  |
| 11-12 Gp3 Focus 1 | 3             | 5998080                | 3137161264  | 57635363                        | 57633968                          | 99934318          | 48187408                 | 0.482191             | 37590667                         | 0.780093                                    | 3303153535                         | 955103158                 | 309104455               | 2038945922                  |
| 11-12 Gp4 Focus 1 | 3             | 5998080                | 3137161264  | 57635363                        | 57633968                          | 82933722          | 43948990                 | 0.529929             | 38910841                         | 0.885364                                    | 3664311061                         | 1237376360                | 464439686               | 1962495015                  |
| 11-12 N           | 3             | 5998080                | 3137161264  | 57635363                        | 57633968                          | 104911674         | 65883552                 | 0.627991             | 59710877                         | 0.906309                                    | 5654586156                         | 1705109906                | 689629018               | 3259847232                  |
| 11-13 Gp3 Focus 1 | 3             | 5998080                | 3137161264  | 57635363                        | 57633968                          | 69516728          | 33424647                 | 0.480814             | 21108921                         | 0.631538                                    | 1833306284                         | 447104859                 | 142063791               | 1244137634                  |
| 11-13 Gp4 Focus 1 | 3             | 5998080                | 3137161264  | 57635363                        | 57633968                          | 87193886          | 40709535                 | 0.466885             | 27000270                         | 0.663242                                    | 2322566210                         | 607400808                 | 192004574               | 1523160828                  |
| 11-13 N           | 3             | 5998080                | 3137161264  | 57635363                        | 57633968                          | 88648174          | 68463170                 | 0.772302             | 60145510                         | 0.878509                                    | 5569849788                         | 2029786366                | 754383344               | 2785680078                  |
| 11-14 Gp3 Focus 1 | 3             | 5998080                | 3137161264  | 57635363                        | 57633968                          | 93496090          | 39639907                 | 0.423974             | 32647596                         | 0.823604                                    | 3035581859                         | 1286895966                | 404895911               | 1343789982                  |
| 11-14 Gp4 Focus 1 | 3             | 5998080                | 3137161264  | 57635363                        | 57633968                          | 98293854          | 35909497                 | 0.365328             | 30289272                         | 0.843489                                    | 2805045035                         | 1078750509                | 358034784               | 1368259742                  |
| 11-14 N           | 3             | 5998080                | 3137161264  | 57635363                        | 57633968                          | 85543076          | 53622306                 | 0.626846             | 47952521                         | 0.894264                                    | 4621444607                         | 1646624028                | 624241224               | 2350579355                  |
| 12-01 Gp3 Focus 1 | 3             | 5998080                | 3137161264  | 57635363                        | 57633968                          | 98588890          | 53021655                 | 0.537806             | 47469844                         | 0.895292                                    | 4563236629                         | 1960174461                | 656414480               | 1946647688                  |
| 12-01 Gp4 Focus 1 | 3             | 5998080                | 3137161264  | 57635363                        | 57633968                          | 103418684         | 54442241                 | 0.526426             | 46114403                         | 0.847034                                    | 4208818825                         | 1640518595                | 543173089               | 2025127141                  |
| 12-01 N           | 3             | 5998080                | 3137161264  | 57635363                        | 57633968                          | 170637090         | 89536340                 | 0.524718             | 80396743                         | 0.897923                                    | 7747921347                         | 2915918887                | 1.016E+09               | 3815710393                  |
| 12-02 Gp3 Focus 1 | 3             | 5998080                | 3137161264  | 57635363                        | 57633968                          | 98962504          | 53054087                 | 0.536103             | 46768698                         | 0.881529                                    | 4476891863                         | 1504803751                | 548518958               | 2423569154                  |
| 12-02 Gp4 Focus 1 | 3             | 5998080                | 3137161264  | 57635363                        | 57633968                          | 81207320          | 47984633                 | 0.59089              | 42427281                         | 0.884185                                    | 4078690326                         | 1215467036                | 508267406               | 2354955884                  |
| 12-02 N           | 3             | 5998080                | 3137161264  | 57635363                        | 57633968                          | 64933654          | 43474071                 | 0.669515             | 39682788                         | 0.912792                                    | 3804440182                         | 1170783114                | 454821800               | 2178835268                  |
| 12-03 Gp3 Focus 1 | 3             | 5998080                | 3137161264  | 57635363                        | 57633968                          | 162459520         | 65502483                 | 0.403193             | 57555837                         | 0.878682                                    | 5429654546                         | 2280941652                | 722927695               | 2425785199                  |
| 12-03 Gp4 Focus 1 | 3             | 5998080                | 3137161264  | 57635363                        | 57633968                          | 117608098         | 48827856                 | 0.415174             | 43025298                         | 0.881163                                    | 4069261042                         | 1752389364                | 531571092               | 1785300586                  |
| 12-03 Gp4 Focus 2 | 5             | 3901294                | 3137161264  | 54413025                        | 56496747                          | 109639462         | 64814324                 | 0.591159             | 55261918                         | 0.852619                                    | 5173587408                         | 1324943019                | 721794773               | 3126849616                  |
| 12-03 N           | 3             | 5998080                | 3137161264  | 57635363                        | 57633968                          | 64159742          | 37539001                 | 0.585087             | 34269128                         | 0.912894                                    | 3317140570                         | 1179252482                | 410020993               | 1727867095                  |
| Mean              |               |                        | 3137161264  | 57461183                        | 57572497                          | 93901446.22       | 54528660.41              | 0.59015459           | 47093893                         | 0.8539819                                   | 4429489082                         | 1523798084                | 521832322               | 2383858676                  |
| Median            |               |                        | 3137161264  | 57635363                        | 57633968                          | 93496090          | 53021655                 | 0.585087             | 46114403                         | 0.881362                                    | 4208818825                         | 1504803751                | 508267406               | 2350579355                  |



| Sample            | Bases Mapped to Bait Intervals |                  |                  | Percent On + Near Bases | Percent Off Target | Mean Bait Coverage (Fold) | Mean Target Coverage (fold) | Percent Unique On-Bait Bases | Percent Unique On-Target Bases | Fold Enrichment | Percent Targets without Coverage | Percent On Target Bases Covered at 2x | Percent On Target Bases Covered at 10x | Percent On Target Bases Covered at 20x | Percent On Target Bases Covered at 30x | Percent On Target Bases Covered at 40x |
|-------------------|--------------------------------|------------------|------------------|-------------------------|--------------------|---------------------------|-----------------------------|------------------------------|--------------------------------|-----------------|----------------------------------|---------------------------------------|----------------------------------------|----------------------------------------|----------------------------------------|----------------------------------------|
|                   | Percent On Bases               | Percent On Bases | Percent On Bases |                         |                    |                           |                             |                              |                                |                 |                                  |                                       |                                        |                                        |                                        |                                        |
| 10-01 Gp3 Focus 1 | 2.354E+09                      | 0.504926         | 0.495074         | 40.84529                | 43.152662          | 0.243057                  | 0.243054                    | 20.343504                    | 0.074115                       | 0.887552        | 0.713089                         | 0.562823                              | 0.449168                               | 0.361247                               |                                        |                                        |
| 10-01 Gp4 Focus 1 | 2.608E+09                      | 0.512454         | 0.487546         | 45.248903               | 47.552748          | 0.241066                  | 0.241064                    | 20.508121                    | 0.066828                       | 0.901306        | 0.74226                          | 0.597684                              | 0.485551                               | 0.396612                               |                                        |                                        |
| 10-01 N           | 2.411E+09                      | 0.503689         | 0.496311         | 41.828551               | 44.598637          | 0.227399                  | 0.227396                    | 20.310192                    | 0.084645                       | 0.875203        | 0.70326                          | 0.55448                               | 0.444707                               | 0.36067                                |                                        |                                        |
| 11-01 Gp3 Focus 1 | 1.506E+09                      | 0.475062         | 0.524938         | 26.127294               | 27.696429          | 0.17716                   | 0.177158                    | 20.910455                    | 0.082358                       | 0.85391         | 0.589511                         | 0.402961                              | 0.286625                               | 0.209107                               |                                        |                                        |
| 11-01 Gp4 Focus 1 | 3.148E+09                      | 0.507929         | 0.492071         | 54.626964               | 56.787964          | 0.236082                  | 0.23608                     | 21.436994                    | 0.05116                        | 0.932876        | 0.813294                         | 0.674199                              | 0.558394                               | 0.463241                               |                                        |                                        |
| 11-01 N           | 2.179E+09                      | 0.515542         | 0.484458         | 37.812166               | 39.854156          | 0.246697                  | 0.246694                    | 21.916531                    | 0.070403                       | 0.896868        | 0.726179                         | 0.557515                              | 0.430252                               | 0.334525                               |                                        |                                        |
| 11-02 Gp3 Focus 1 | 1.649E+09                      | 0.393615         | 0.606385         | 28.606621               | 30.21211           | 0.130265                  | 0.130263                    | 16.377391                    | 0.074242                       | 0.882056        | 0.659229                         | 0.469211                              | 0.339033                               | 0.247669                               |                                        |                                        |
| 11-02 Gp4 Focus 1 | 1.602E+09                      | 0.42322          | 0.57678          | 27.804345               | 29.440781          | 0.151443                  | 0.151441                    | 17.397693                    | 0.077202                       | 0.885419        | 0.657781                         | 0.460441                              | 0.327116                               | 0.235515                               |                                        |                                        |
| 11-02 Gp4 Focus 2 | 633913476                      | 0.311623         | 0.688377         | 11.190077               | 12.520817          | 0.074949                  | 0.07803                     | 12.278923                    | 0.141115                       | 0.750967        | 0.388334                         | 0.183161                              | 0.091492                               | 0.048574                               |                                        |                                        |
| 11-02 N           | 1.455E+09                      | 0.477888         | 0.522112         | 25.250459               | 27.183251          | 0.193939                  | 0.193937                    | 19.504663                    | 0.09708                        | 0.853021        | 0.615281                         | 0.424265                              | 0.299329                               | 0.214131                               |                                        |                                        |
| 11-03 Gp3 Focus 1 | 785645828                      | 0.273417         | 0.726583         | 13.631484               | 14.728587          | 0.124235                  | 0.124233                    | 10.593842                    | 0.109364                       | 0.814864        | 0.437562                         | 0.222384                              | 0.122621                               | 0.071474                               |                                        |                                        |
| 11-03 Gp4 Focus 1 | 667154456                      | 0.419505         | 0.580495         | 11.575603               | 12.973597          | 0.185716                  | 0.185713                    | 16.810507                    | 0.158784                       | 0.727902        | 0.352322                         | 0.183798                              | 0.106239                               | 0.064443                               |                                        |                                        |
| 11-03 N           | 898121784                      | 0.411113         | 0.588887         | 15.583023               | 17.080529          | 0.168718                  | 0.168715                    | 15.841745                    | 0.124791                       | 0.804806        | 0.476499                         | 0.269803                              | 0.160609                               | 0.098801                               |                                        |                                        |
| 11-10 Gp3 Focus 1 | 1.813E+09                      | 0.407111         | 0.592889         | 31.461559               | 33.091735          | 0.187773                  | 0.187771                    | 16.93164                     | 0.068879                       | 0.895743        | 0.686248                         | 0.49696                               | 0.365638                               | 0.272369                               |                                        |                                        |
| 11-10 Gp3 Focus 2 | 657956037                      | 0.486015         | 0.513985         | 11.416209               | 20.72764           | 0.08912                   | 0.089117                    | 19.794713                    | 0.596433                       | 0.201279        | 0.123776                         | 0.102024                              | 0.087306                               | 0.075854                               |                                        |                                        |
| 11-10 Gp4 Focus 1 | 1.355E+09                      | 0.402871         | 0.597129         | 23.518611               | 25.074348          | 0.167441                  | 0.167439                    | 16.736731                    | 0.088682                       | 0.852591        | 0.57449                          | 0.379353                              | 0.262499                               | 0.186627                               |                                        |                                        |
| 11-10 Gp4 Focus 2 | 738039093                      | 0.408335         | 0.591665         | 12.805459               | 18.597452          | 0.102614                  | 0.102613                    | 16.517881                    | 0.429218                       | 0.32582         | 0.198599                         | 0.15189                               | 0.121862                               | 0.099705                               |                                        |                                        |
| 11-10 N           | 2.003E+09                      | 0.429788         | 0.570212         | 34.76062                | 36.893111          | 0.181849                  | 0.181847                    | 18.090834                    | 0.080095                       | 0.871417        | 0.662424                         | 0.494922                              | 0.381045                               | 0.298458                               |                                        |                                        |
| 11-12 Gp3 Focus 1 | 955095510                      | 0.382727         | 0.617273         | 16.571478               | 26.501284          | 0.095573                  | 0.095572                    | 15.738717                    | 0.513049                       | 0.308876        | 0.169551                         | 0.126347                              | 0.103901                               | 0.089004                               |                                        |                                        |
| 11-12 Gp4 Focus 1 | 1.237E+09                      | 0.46443          | 0.53557          | 21.469048               | 24.485946          | 0.149201                  | 0.149199                    | 18.380499                    | 0.186072                       | 0.696916        | 0.401027                         | 0.267655                              | 0.196713                               | 0.151656                               |                                        |                                        |
| 11-12 N           | 1.705E+09                      | 0.423504         | 0.576496         | 29.584439               | 31.523104          | 0.162528                  | 0.162526                    | 16.413431                    | 0.084974                       | 0.878652        | 0.657115                         | 0.468287                              | 0.339877                               | 0.25133                                |                                        |                                        |
| 11-13 Gp3 Focus 1 | 447103372                      | 0.321369         | 0.678631         | 7.757475                | 21.626267          | 0.064316                  | 0.064316                    | 13.274622                    | 0.805469                       | 0.077227        | 0.031952                         | 0.026867                              | 0.024404                               | 0.022678                               |                                        |                                        |
| 11-13 Gp4 Focus 1 | 607396800                      | 0.344191         | 0.655809         | 10.538683               | 18.387602          | 0.069661                  | 0.06966                     | 14.234921                    | 0.56986                        | 0.241523        | 0.094378                         | 0.063603                              | 0.050249                               | 0.042463                               |                                        |                                        |
| 11-13 N           | 2.03E+09                       | 0.499864         | 0.500136         | 35.217725               | 37.758536          | 0.228971                  | 0.228968                    | 19.836026                    | 0.092718                       | 0.86546         | 0.655421                         | 0.489321                              | 0.376423                               | 0.295561                               |                                        |                                        |
| 11-14 Gp3 Focus 1 | 1.287E+09                      | 0.55732          | 0.44268          | 22.328236               | 32.756034          | 0.137642                  | 0.137641                    | 23.075403                    | 0.445756                       | 0.403619        | 0.247637                         | 0.19139                               | 0.159501                               | 0.137205                               |                                        |                                        |
| 11-14 Gp4 Focus 1 | 1.079E+09                      | 0.512215         | 0.487785         | 18.716816               | 29.479019          | 0.109748                  | 0.109746                    | 20.93288                     | 0.503423                       | 0.347634        | 0.22168                          | 0.172922                              | 0.14348                                | 0.122723                               |                                        |                                        |
| 11-14 N           | 1.647E+09                      | 0.491376         | 0.508624         | 28.569683               | 30.39136           | 0.192491                  | 0.192488                    | 19.393871                    | 0.083059                       | 0.880618        | 0.660979                         | 0.465335                              | 0.333238                               | 0.242189                               |                                        |                                        |
| 12-01 Gp3 Focus 1 | 1.96E+09                       | 0.573406         | 0.426594         | 34.009927               | 36.090085          | 0.198823                  | 0.198821                    | 23.381348                    | 0.087289                       | 0.848771        | 0.543849                         | 0.384633                              | 0.298506                               | 0.241404                               |                                        |                                        |
| 12-01 Gp4 Focus 1 | 1.641E+09                      | 0.518837         | 0.481163         | 28.463751               | 35.92585           | 0.158629                  | 0.158628                    | 21.216256                    | 0.301275                       | 0.54197         | 0.324264                         | 0.247329                              | 0.204527                               | 0.174955                               |                                        |                                        |
| 12-01 N           | 2.916E+09                      | 0.507518         | 0.492482         | 50.592531               | 52.753587          | 0.170884                  | 0.170883                    | 20.485098                    | 0.057615                       | 0.917389        | 0.732652                         | 0.577166                              | 0.470277                               | 0.391106                               |                                        |                                        |
| 12-02 Gp3 Focus 1 | 1.505E+09                      | 0.458649         | 0.541351         | 26.109036               | 27.390449          | 0.152058                  | 0.152056                    | 18.295786                    | 0.067604                       | 0.884028        | 0.568124                         | 0.357956                              | 0.247097                               | 0.181298                               |                                        |                                        |
| 12-02 Gp4 Focus 1 | 1.215E+09                      | 0.42262          | 0.57738          | 21.088911               | 22.142399          | 0.149675                  | 0.149673                    | 16.220725                    | 0.069349                       | 0.880762        | 0.524342                         | 0.294692                              | 0.189962                               | 0.134015                               |                                        |                                        |
| 12-02 N           | 1.171E+09                      | 0.427291         | 0.572709         | 20.313624               | 22.66386           | 0.180305                  | 0.180302                    | 16.750721                    | 0.138769                       | 0.795248        | 0.525007                         | 0.342683                              | 0.232312                               | 0.161081                               |                                        |                                        |
| 12-03 Gp3 Focus 1 | 2.281E+09                      | 0.553234         | 0.446766         | 39.575385               | 43.683025          | 0.140401                  | 0.140399                    | 22.865978                    | 0.142641                       | 0.7454          | 0.456438                         | 0.338172                              | 0.274996                               | 0.23302                                |                                        |                                        |
| 12-03 Gp4 Focus 1 | 1.752E+09                      | 0.561272         | 0.438728         | 30.40476                | 32.997801          | 0.149002                  | 0.149001                    | 23.440284                    | 0.117306                       | 0.775521        | 0.437683                         | 0.291969                              | 0.222961                               | 0.180966                               |                                        |                                        |
| 12-03 Gp4 Focus 2 | 1.394E+09                      | 0.395613         | 0.604387         | 24.34974                | 26.843468          | 0.120845                  | 0.127178                    | 14.765202                    | 0.10218                        | 0.847206        | 0.643807                         | 0.461555                              | 0.320627                               | 0.216466                               |                                        |                                        |
| 12-03 N           | 1.179E+09                      | 0.479109         | 0.520891         | 20.460572               | 22.070116          | 0.183799                  | 0.183797                    | 19.350435                    | 0.104368                       | 0.837811        | 0.549855                         | 0.347599                              | 0.229275                               | 0.155163                               |                                        |                                        |
| Mean              | 1.526E+09                      | 0.4529364        | 0.54706357       | 26.492299               | 30.09828           | 0.160650676               | 0.160903216                 | 18.3879612                   | 0.1877884                      | 0.7294116       | 0.50178105                       | 0.35414473                            | 0.2631841                              | 0.201710946                            |                                        |                                        |
| Median            | 1.505E+09                      | 0.46443          | 0.53557          | 26.109036               | 29.440781          | 0.162528                  | 0.162526                    | 18.380499                    | 0.09708                        | 0.848771        | 0.549855                         | 0.357956                              | 0.262499                               | 0.186627                               |                                        |                                        |

| Sample            | Percent On Target Bases Covered at 50x | Percent On Target Bases Covered at 100x | Unique Library Molecules | % Under Covered AT regions | % Under Covered GC Regions |
|-------------------|----------------------------------------|-----------------------------------------|--------------------------|----------------------------|----------------------------|
| 10-01 Gp3 Focus 1 | 0.291391                               | 0.103567                                | 27131421                 | 2.571488                   | 18.043049                  |
| 10-01 Gp4 Focus 1 | 0.325268                               | 0.124014                                | 30550244                 | 2.783109                   | 17.93582                   |
| 10-01 N           | 0.29473                                | 0.112987                                | 25056624                 | 1.267461                   | 22.734788                  |
| 11-01 Gp3 Focus 1 | 0.1559                                 | 0.044196                                | 12464057                 | 3.91791                    | 8.551229                   |
| 11-01 Gp4 Focus 1 | 0.385419                               | 0.160596                                | 34322079                 | 4.199153                   | 9.66224                    |
| 11-01 N           | 0.261819                               | 0.083192                                | 24087567                 | 2.746272                   | 15.514336                  |
| 11-02 Gp3 Focus 1 | 0.182206                               | 0.043339                                | 12915249                 | 2.783361                   | 14.35033                   |
| 11-02 Gp4 Focus 1 | 0.171405                               | 0.039818                                | 14151751                 | 3.903233                   | 14.213213                  |
| 11-02 Gp4 Focus 2 | 0.027127                               | 0.002651                                | 5024312                  | 7.306844                   | 6.541224                   |
| 11-02 N           | 0.154675                               | 0.032886                                | 13599985                 | 1.747904                   | 21.312466                  |
| 11-03 Gp3 Focus 1 | 0.043797                               | 0.006025                                | 10056115                 | 3.388409                   | 15.020479                  |
| 11-03 Gp4 Focus 1 | 0.040624                               | 0.005499                                | 7569665                  | 2.187367                   | 17.359724                  |
| 11-03 N           | 0.062211                               | 0.008306                                | 9553012                  | 3.206655                   | 16.656886                  |
| 11-10 Gp3 Focus 1 | 0.205073                               | 0.054978                                | 20245671                 | 3.273632                   | 15.689328                  |
| 11-10 Gp3 Focus 2 | 0.066595                               | 0.03779                                 | 5513199                  | 2.597397                   | 8.36857                    |
| 11-10 Gp4 Focus 1 | 0.13551                                | 0.032587                                | 13473136                 | 4.478897                   | 16.514127                  |
| 11-10 Gp4 Focus 2 | 0.082613                               | 0.035372                                | 6513160                  | 1.741161                   | 9.862863                   |
| 11-10 N           | 0.235998                               | 0.079225                                | 17825283                 | 3.484452                   | 18.147618                  |
| 11-12 Gp3 Focus 1 | 0.07808                                | 0.047419                                | 8521212                  | 18.828768                  | 4.276563                   |
| 11-12 Gp4 Focus 1 | 0.120729                               | 0.049056                                | 11096815                 | 28.90725                   | 3.408482                   |
| 11-12 N           | 0.188138                               | 0.050901                                | 17128191                 | 2.077016                   | 15.047545                  |
| 11-13 Gp3 Focus 1 | 0.021334                               | 0.017015                                | 3863167                  | 5.534232                   | 8.348112                   |
| 11-13 Gp4 Focus 1 | 0.037197                               | 0.023896                                | 5271994                  | 2.104619                   | 12.109629                  |
| 11-13 N           | 0.234841                               | 0.083359                                | 27195751                 | 2.564102                   | 18.173925                  |
| 11-14 Gp3 Focus 1 | 0.120254                               | 0.069601                                | 10387188                 | 28.608067                  | 4.782018                   |
| 11-14 Gp4 Focus 1 | 0.106623                               | 0.058708                                | 8787688                  | 30.998783                  | 3.571985                   |
| 11-14 N           | 0.178704                               | 0.044864                                | 16222890                 | 2.047872                   | 13.408678                  |
| 12-01 Gp3 Focus 1 | 0.200371                               | 0.093551                                | 16977634                 | 31.255815                  | 3.381309                   |
| 12-01 Gp4 Focus 1 | 0.152456                               | 0.086027                                | 14790596                 | 32.497526                  | 3.333902                   |
| 12-01 N           | 0.329422                               | 0.153487                                | 25070246                 | 15.534268                  | 6.335949                   |
| 12-02 Gp3 Focus 1 | 0.138657                               | 0.04975                                 | 13396695                 | 18.615858                  | 2.897681                   |
| 12-02 Gp4 Focus 1 | 0.100099                               | 0.033165                                | 11582122                 | 20.348277                  | 3.240493                   |
| 12-02 N           | 0.113477                               | 0.022241                                | 11857638                 | 1.221552                   | 25.553171                  |
| 12-03 Gp3 Focus 1 | 0.201781                               | 0.113895                                | 18023350                 | 32.697887                  | 5.145077                   |
| 12-03 Gp4 Focus 1 | 0.151909                               | 0.078831                                | 13813082                 | 32.910659                  | 4.985944                   |
| 12-03 Gp4 Focus 2 | 0.143639                               | 0.018999                                | 12887348                 | 0.510163                   | 23.063813                  |
| 12-03 N           | 0.107337                               | 0.020492                                | 10379587                 | 2.797521                   | 13.185417                  |
| Mean              | 0.1580381                              | 0.0573591                               | 14792046.6               | 9.9363497                  | 11.911567                  |
| Median            | 0.151909                               | 0.047419                                | 13396695                 | 3.388409                   | 13.185417                  |
